# Supplementary material for: Proteomics investigation of human platelets in healthy donors and cystic fibrosis patients by shotgun nUPLC-MSE and 2DE: a comparative study
Source: Royal Society of Chemistry journal article supplement (doi:10.1039/c0mb00135j), 2010-11-12
Supplement: c0mb00135j.pdf [file c0mb00135j.pdf]

A

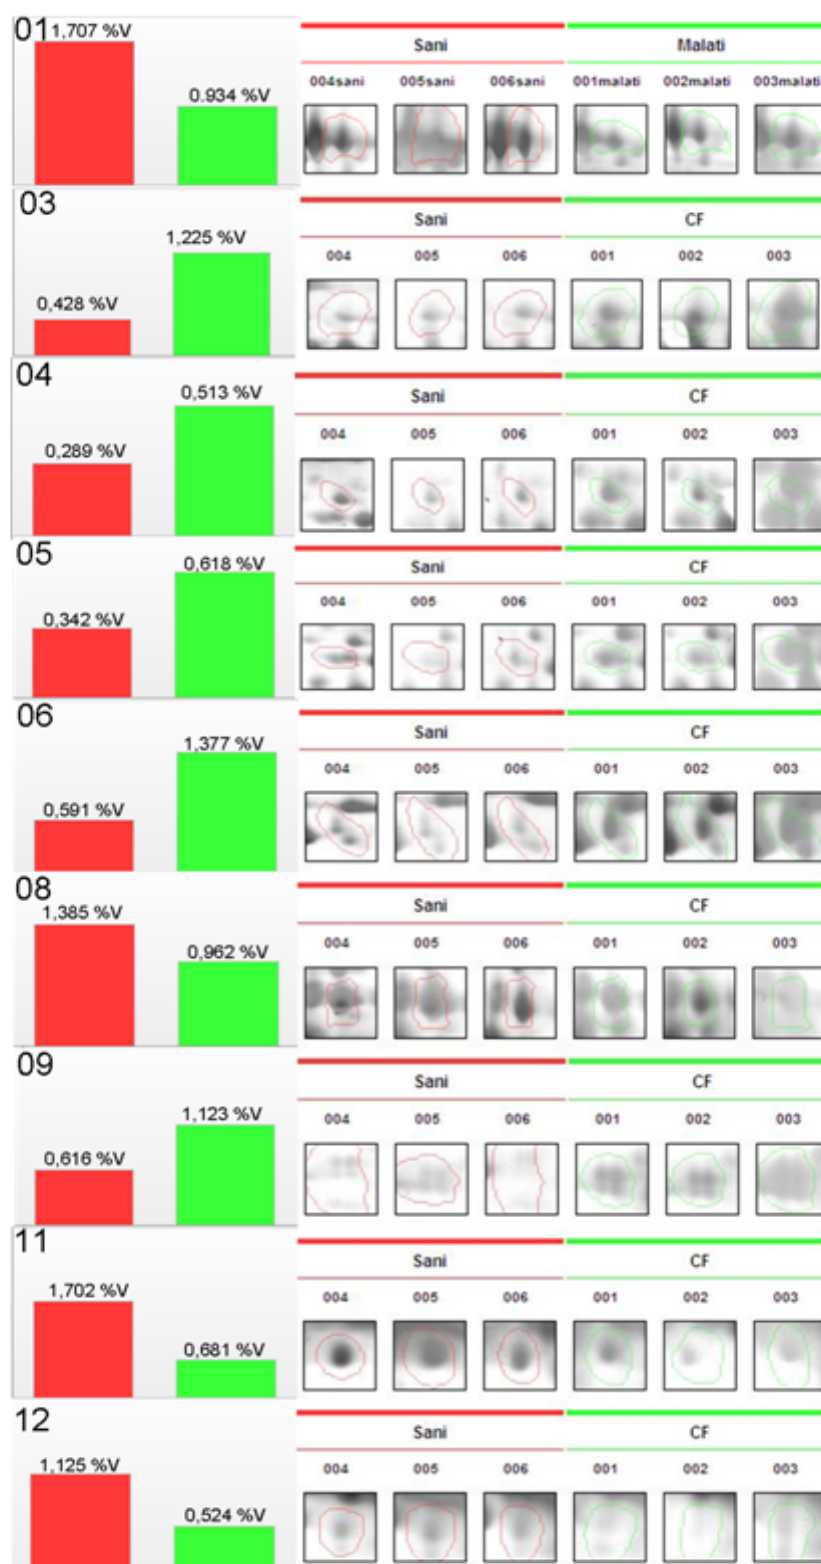

Supplementary Fig. 1

B

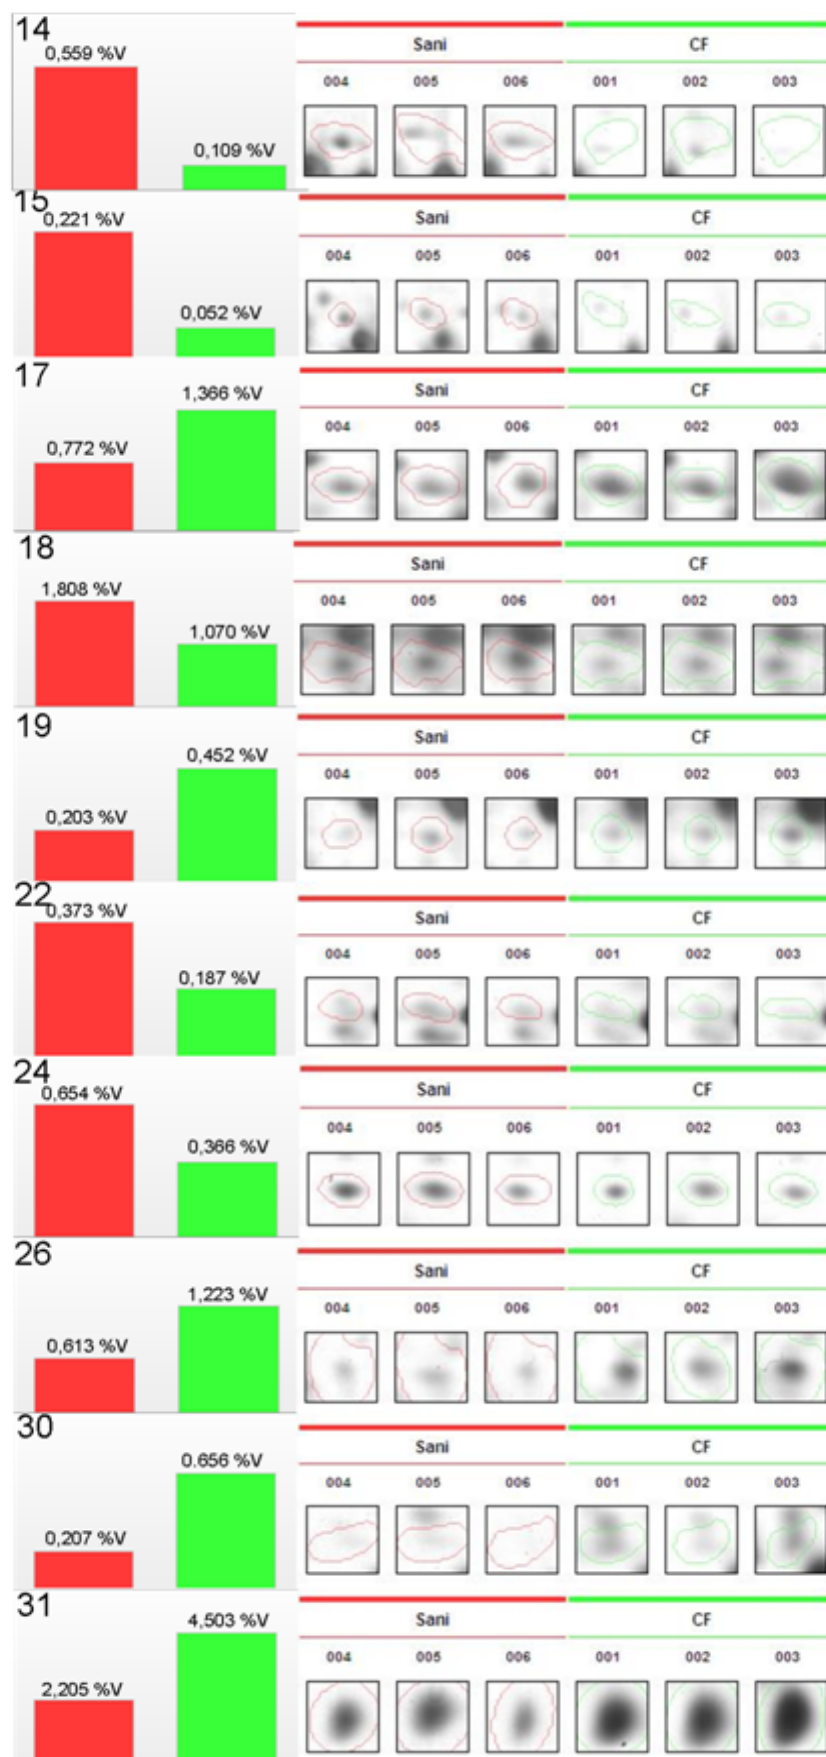

Supplementary Fig. 1

C

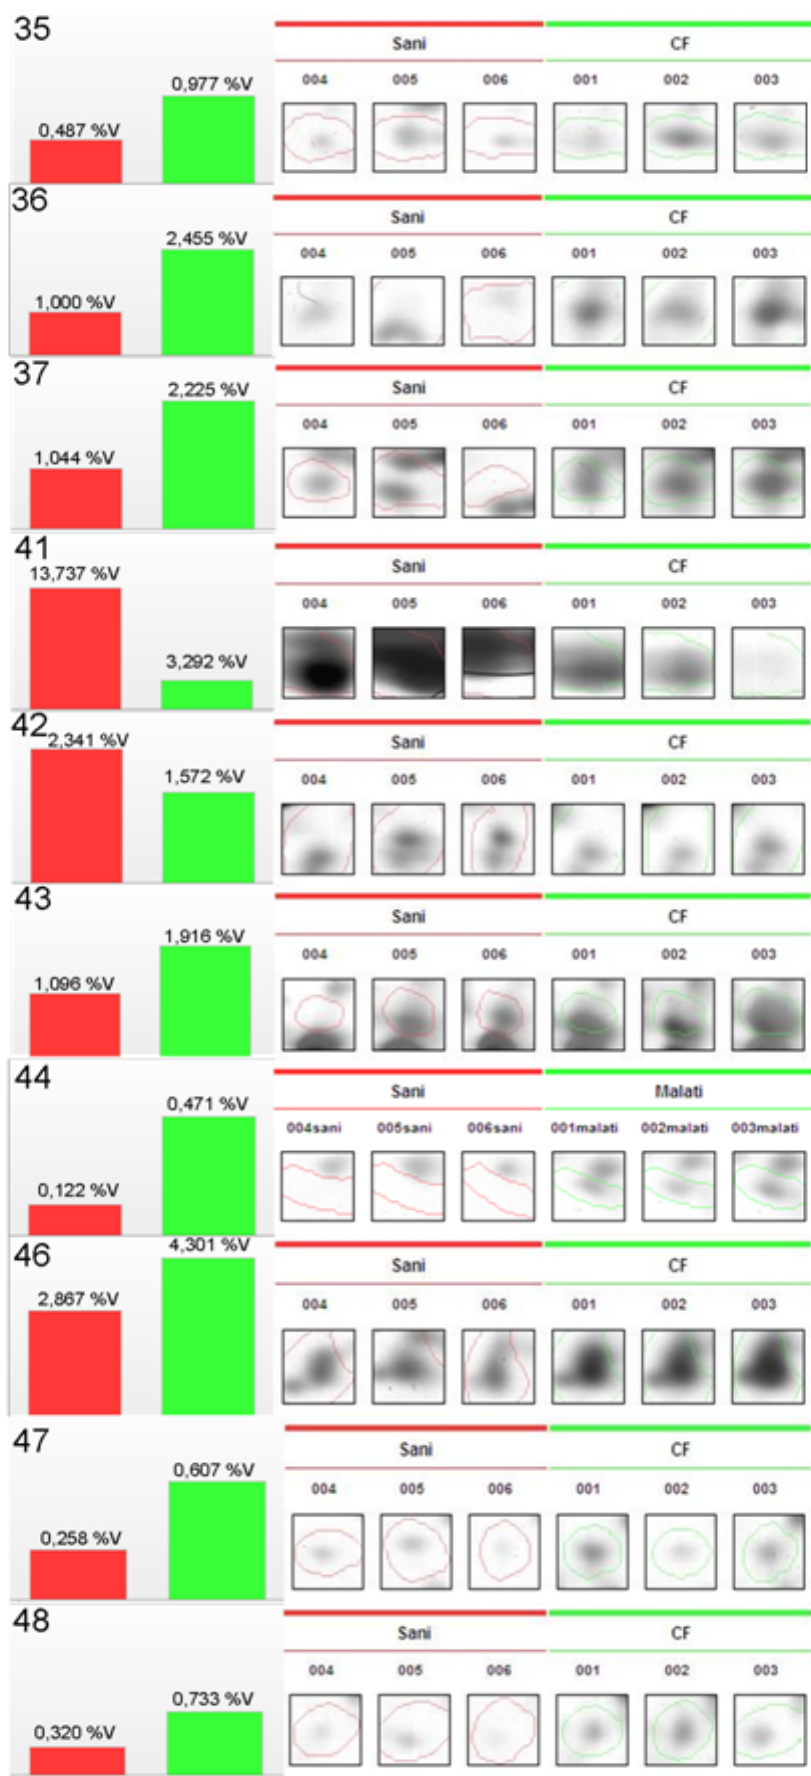

Supplementary Fig. 1

D

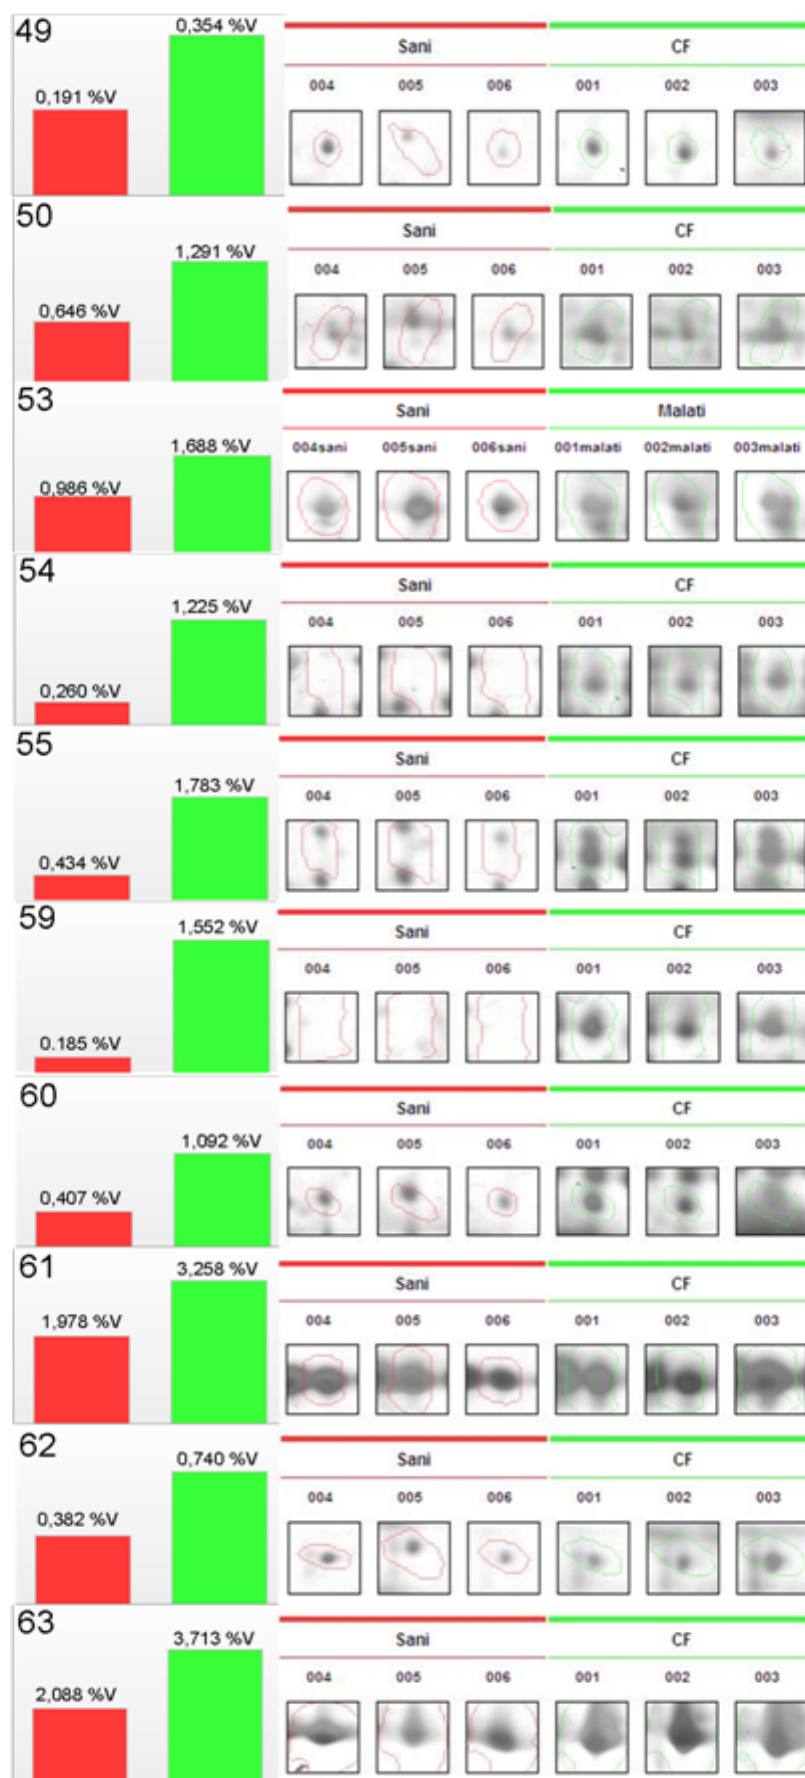

Supplementary Fig. 1

E

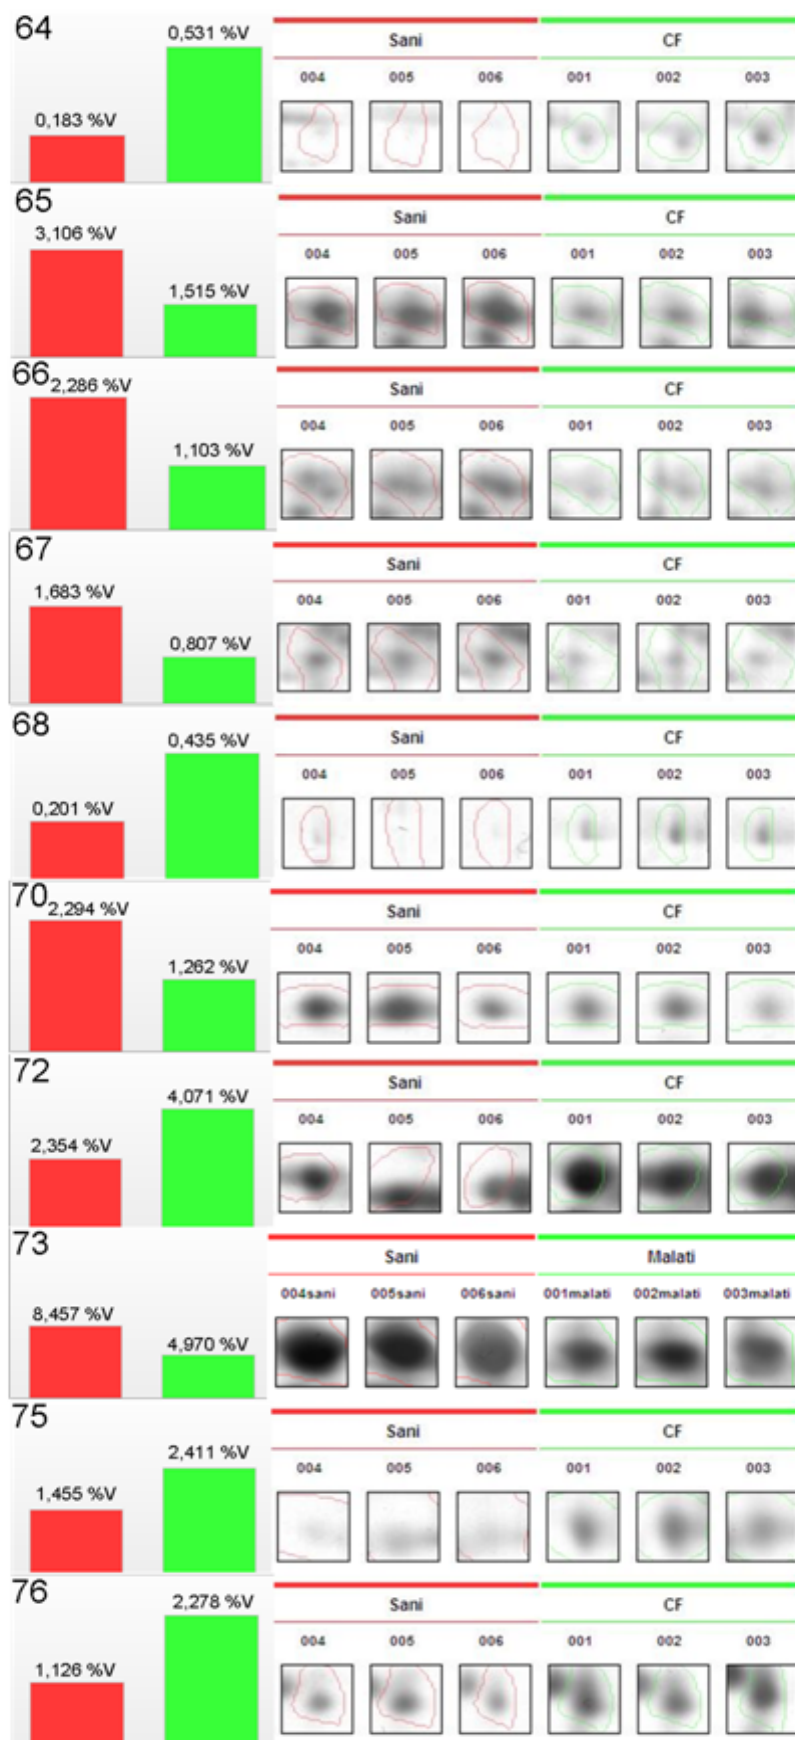

Supplementary Fig. 1

F

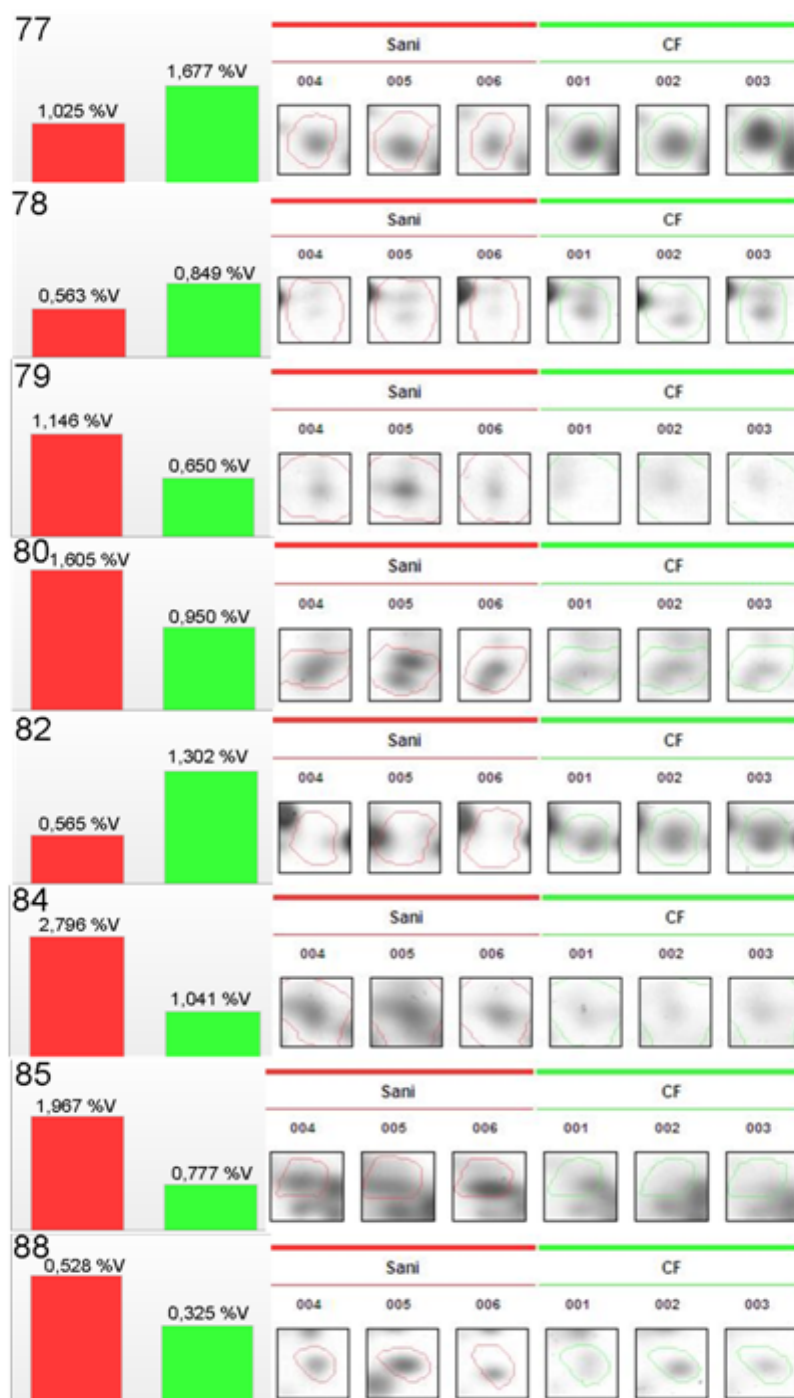

Supplementary Fig. 1
