# Supplementary material for: Proteomics investigation of human platelets in healthy donors and cystic fibrosis patients by shotgun nUPLC-MSE and 2DE: a comparative study
Source: Royal Society of Chemistry journal article supplement (doi:10.1039/c0mb00135j), 2010-11-12
Supplement: c0mb00135j1.pdf [file c0mb00135j1.pdf]

## Column Chromatography

### Name of Person/People Completing template

Valeria Marzano

#### 1. General features

##### 1.(a) Global Descriptors

Date stamp: 2009-07-31

Responsible person: Valeria Marzano

##### 1. (b) Sample

Brief description of sample: Human platelets

Processing applied to the sample: Platelets were dissolved in 100 mM Tris pH 7.5 containing 6 M Urea. After reduction and alkylation of proteins, samples were digested with 50:1 (w/w) sequence grade trypsin at 37° C overnight. Samples were diluted with 0.1% formic acid to a final concentration of 0.365 ug/ul in presence of Enolase *Saccharomyces cerevisiae* digestion (50fmol/ul).

Sample injection: sample temperature 15 °C; injection volume = 2µl, full loop

#### 2. Equipment

##### 2.(a) Product details for Column

Manufacturer: Waters Corp.

Model: nanoACQUITY UPLC BEH300 C18, 75µm X 250 mm, 1.7µm

Separation Mode: Reverse Phase

##### 2. (b) Physical Characteristics of Column

Dimensions: length 250 mm; inner diameter 75µm

Description of stationary phase: C18, particle size 1.7µm

Additional accessories: nanoACQUITY UPLC Trap Symmetry C18, 180µm X 20 mm, 5µm

##### 2. (c) Chromatography System Used for the Separation

Manufacturer: Waters Corp.

Model: NanoAcquity UPLC

Controller software and version: MassLynx v.4.1

#### 3. Mobile Phase

Name of Mobile phase: A; Description of the constituents: 99.9% water/0.1% formic acid

Name of Mobile phase: B; Description of the constituents: 99.9% acetonitrile/0.1% formic acid

#### 4. Properties of the Column Run

Separation run

Time:151 min

Flow: 0.3 µl/min

Time(min): 0        %A:97    %B:3    Curve = -

Time(min): 1.00    %A:97    %B:3    Curve = 6

Time(min): 120.00   %A:60    %B:40   Curve = 6

Time(min): 135.00   %A:10    %B:90   Curve = 6

Time(min): 150.00   %A:10    %B:90   Curve = 6

Time(min): 151.00   %A:97    %B:3    Curve = 6

Temperature: 50 °C

#### 5. Pre and Post Run Processes

Type: Trapping, pre run process

Substance: 100% A

Time: 5.00 min

Flow rate: 10 µL/min

Type: Equilibration, post run process

Substance: 97% A, 3%B

Time: 29.0 min  
Flow rate: 0.3  $\mu\text{L}/\text{min}$

## 6. Column Outputs

### 6.(a) Detection

Equipment used for detection: Waters Corp., Q-Tof Premiere  
Type: mass spectrometer  
Equipment settings: Expression analysis  
Timescale over which data was collected: 10-150 min

### 6. (b) Fractions

Fraction description: Fractions not collected, eluent directed to MS

## Mass Spectrometry

### 1. General features

#### 1.(a) Global descriptors

Date stamp: 2009-07-31  
Responsible person: Valeria Marzano  
Instrument manufacturer, model: Waters Corporation, Q-Tof Premiere

#### 1. (b) Control and analysis software

Software name and version: MassLynx v4.1 and ProteinLynx Global Server, v2.3  
Switching criteria: Expression (Electrospray-shotgun) (see Ref. 1)  
Acquisition times: start 10 minutes, end 150 minutes  
Acquisition ionization mode: Source: ESI; Polarity: positive; Analyzer mode: V mode  
TOF MS: MS survey over the range: Start 50 Da, End 1990 Da; MS survey scanning conditions:  
scan time 1.5 seconds  
Expression criteria: Ramp high energy from 15 to 40 volts; Low energy 4 volts  
Lock mass: Reference scan: Scan time 1.5 seconds, frequency: 30 seconds; Sampling cone 35  
volts; Collision Energy 4 volts.

### 2. Ion sources (a) Electrospray ionization (ESI)

Supply type: Fed nanoelectrospray: NanoLockSpray source equipped with a reference spray (Lock mass)  
Interface manufacturer: nanoACQUITY UPLC, Waters Corporation  
Sprayer type: PicoTip EMITTER SilicaTip, 10 $\pm$ 1  $\mu\text{m}$ , New Objective, Inc.  
Relevant voltage: capillary 2.8 kV, sampling cone 35, extraction cone 2.5, ion guide 2.5  
Nebulizing gas: cone 26 l/hr, nanoflow 0.40 bar

### 3. Post-source componentry (b) TOF drift tube

Reflectron status: ON (ion optics in V-mode)

### 3. Post-source componentry (d) Collision energy

Collision energy: Expression criteria (Electrospray-shotgun): continuous gradient of collision energies from 15 to 40 V. The radiofrequency applied to the quadrupole mass analyzer was adjusted such that ions from m/z 300 to 2000 were efficiently transmitted, ensuring that any ions less than m/z 300 observed in the LC-MS data only arose from dissociations in the collision cell.

### 3. Post-source componentry (f) Detectors

Detector type: microchannel plate/time to digital converter (MCP/TDC)

### 4. Spectrum and peak list generation and annotation

#### **4. (a) Spectrum description**

Source files: PLT\_sani\_290709\_01, PLT\_sani\_290709\_02, PLT\_sani\_290709\_03,  
PLT\_CF\_290709\_01, PLT\_CF\_290709\_02, PLT\_CF\_290709\_03

MS level for each spectrum: MS and MS<sup>E</sup>

Ion mode for each spectrum: positive

Precursor m/z and charge: see SupplPeptideTable\_Pieroni\_01/02/03/04/05/06.pdf

#### **4. (b) Peak list generation**

This task was performed with the specific algorithm of the ProteinLynx Global Server (PLGS) v2.3 developed for Electrospray-Shotgun mass acquisition: peak apexes are located, the data calibrated and lock-mass corrected (using Apex3D), and then deconvoluted (using Peptide3D) (see Ref.2, 3).

Processing parameters applied:

Chromatographic peak width: Automatic

MS TOF resolution: Automatic

Lock mass for charge 2: 785.8426 Da/e

Lock mass Window (Tolerance): 0.25 Da

Low energy Threshold: 250 counts

Elevated energy Threshold: 100 counts

Retention time window: automatic

Intensity threshold value: 1500counts

### **Mass Spectrometry Informatics**

#### **1. General features (a) Global decriptors**

Date stamp: 2009-07-31

Responsible person: Valeria Marzano

Software name, version and manufacturer: ProteinLynx Global Server, v2.3, Waters Corporation

Location of the file generated: contact Valeria Marzano, project:

Proj\_\_12336763316560\_16970584927243348

#### **2. Input data and parameters**

##### **2.(a) input data**

Description and type of MS data:

Healthy PLT LC-MS run1 = PLT\_sani\_290709\_01,

Healthy PLT LC-MS run2 = PLT\_sani\_290709\_02,

Healthy PLT LC-MS run3 = PLT\_sani\_290709\_03,

Cystic Fibrosis PLT LC-MS run1 = PLT\_CF\_290709\_01,

Cystic Fibrosis PLT LC-MS run2 = PLT\_CF\_290709\_02,

Cystic Fibrosis PLT LC-MS run3 = PLT\_CF\_290709\_03

##### **2. (b) input parameters**

Database queried: UniProtKB/Swiss-Prot Protein Knowledgebase, release 56.0 of 22-July-08 containing 392667 sequence entries

Taxonomical restrictions: Homo sapiens (Human), 20069 sequence entries

Description of tool and scoring scheme: Search engine PLGS, ESI-QUAD-TOF, Ion accounting algorithm (see Ref.4)

Specified cleavage agent: Trypsin

Allowed number of missed cleavage: 1

Permissible amino acid modifications: Fixed: cysteine carbamidomethylation; variable: oxidation of methionine

Peptide tolerance: Automatic

Fragment tolerance: Automatic

Threshold, minimum scores for peptides, proteins: Minimum number of fragment ion matches for a peptide: 3; minimum number of fragment ion matches for a protein: 7; minimum number of peptide matches for a protein: 2.

Other relevant parameters: maximum protein mass 250000 Da; false positive rate 4%; data from Enolase *Saccharomyces cerevisiae* (UniProt/Swiss-Prot AC: P00924) was appended to the database.

### 3. The output of the procedure

#### 3.(a) for identified proteins

See file: SupplProteinTable\_Pieroni.pdf

#### 3.(b) for identified peptides

See file: SupplPeptideTable\_Pieroni\_01/02/03704/05/06.pdf

#### 3. (c) quantitation

Quantitation approach: Expression Analysis (PLGS, Waters Corp.)

Quantitation measurement: The intensity of peptides matched on the basis of their unique EMRT (Exact Mass Retention Time) signatures are compared to determine their relative abundance. The relative expression of each identified protein is calculated from the averaged ratio of multiple matched EMRT signatures (Ref. 5).

Number of replicates: 3

Acceptance criteria: Replicate filter settings: 2 out of three replicate for each condition; probability of upregulation settings: P-value lower than 0.05 and upper than 0.95.

Results: See Table2

### References:

- 1 Vissers JP, Langridge JI, Aerts JM. Analysis and quantification of diagnostic serum markers and protein signatures for Gaucher disease. *Mol Cell Proteomics*. 2007;6:755-66.
- 2 Geromanos SJ, Vissers JP, Silva JC, Dorschel CA, Li GZ, Gorenstein MV, et al. The detection, correlation, and comparison of peptide precursor and product ions from data independent LC-MS with data dependant LC-MS/MS. *Proteomics*. 2009;9:1683-95.
- 3 Silva JC, Denny R, Dorschel CA, Gorenstein M, Kass IJ, Li GZ, et al. Quantitative proteomic analysis by accurate mass retention time pairs. *Anal Chem*. 2005;77:2187-200.
- 4 Li GZ, Vissers JP, Silva JC, Golick D, Gorenstein MV, Geromanos SJ. Database searching and accounting of multiplexed precursor and product ion spectra from the data independent analysis of simple and complex peptide mixtures. *Proteomics*. 2009;9:1696-719.
- 5 Silva JC, Gorenstein MV, Li GZ, Vissers JP, Geromanos SJ. Absolute quantification of proteins by LCMSE: a virtue of parallel MS acquisition. *Mol Cell Proteomics*. 2006;5:144-56.

**Healthy PLT LC-MS run 1: PLT\_sani\_290709\_01**

| Accession | Description                              | mW (Da) | pI (pH) | PLGS Score | Peptides | Theoretical Peptides | Coverage (%) | Precursor RMS Mass Error (ppm) | Products | Modified Peptides | Products RMS Mass Error (ppm) | Products RMS RT Error (min) |
|-----------|------------------------------------------|---------|---------|------------|----------|----------------------|--------------|--------------------------------|----------|-------------------|-------------------------------|-----------------------------|
| P35579    | Myosin 9                                 | 226390  | 5.34    | 4008.92    | 124      | 164                  | 59.49        | 7.81                           | 929      | 6                 | 18.18                         | 0.043                       |
| P35580    | Myosin 10                                | 228856  | 5.27    | 1625.52    | 71       | 164                  | 44.79        | 9.14                           | 364      | 10                | 22.10                         | 0.047                       |
| P18206    | Vinculin                                 | 123721  | 5.35    | 2229.62    | 54       | 107                  | 62.08        | 6.98                           | 493      | 10                | 17.10                         | 0.041                       |
| Q7Z406    | Myosin 14                                | 227861  | 5.63    | 1601.60    | 53       | 173                  | 35.84        | 9.25                           | 334      | 8                 | 21.87                         | 0.046                       |
| P35749    | Myosin 11                                | 227197  | 5.25    | 1470.44    | 51       | 161                  | 35.34        | 9.69                           | 293      | 9                 | 23.32                         | 0.047                       |
| P07996    | Thrombospondin 1                         | 129299  | 4.53    | 2226.52    | 47       | 101                  | 57.69        | 7.93                           | 420      | 2                 | 19.26                         | 0.042                       |
| P12814    | Alpha actinin 1                          | 102992  | 5.09    | 1617.21    | 47       | 77                   | 67.49        | 9.65                           | 349      | 5                 | 20.59                         | 0.044                       |
| O43707    | Alpha actinin 4                          | 104788  | 5.12    | 1133.34    | 34       | 87                   | 49.73        | 9.58                           | 227      | 1                 | 21.97                         | 0.046                       |
| P02768    | Serum albumin                            | 69321   | 5.86    | 1069.56    | 34       | 55                   | 58.46        | 7.77                           | 285      | 3                 | 17.81                         | 0.039                       |
| P02671    | Fibrinogen alpha chain                   | 94914   | 5.61    | 833.60     | 33       | 59                   | 43.65        | 7.36                           | 232      | 5                 | 20.16                         | 0.046                       |
| P63261    | Actin cytoplasmic 2                      | 41765   | 5.16    | 2868.90    | 30       | 34                   | 88.00        | 7.09                           | 515      | 2                 | 13.39                         | 0.038                       |
| P06396    | Gelsolin                                 | 85644   | 5.84    | 944.76     | 30       | 51                   | 57.80        | 8.66                           | 223      | 0                 | 19.71                         | 0.043                       |
| Q14112    | Nidogen 2                                | 151299  | 4.92    | 757.20     | 28       | 92                   | 31.78        | 11.33                          | 180      | 3                 | 25.84                         | 0.048                       |
| Q86UX7    | Fermitin family homolog 3                | 75905   | 6.54    | 814.30     | 27       | 45                   | 58.92        | 8.21                           | 200      | 4                 | 20.24                         | 0.042                       |
| P60709    | Actin cytoplasmic 1                      | 41709   | 5.14    | 2843.04    | 24       | 34                   | 89.07        | 6.89                           | 478      | 6                 | 13.19                         | 0.037                       |
| Q6S8J3    | ANKRD26 like family C member 1A          | 121285  | 5.77    | 1387.57    | 24       | 101                  | 32.37        | 8.57                           | 230      | 5                 | 17.60                         | 0.040                       |
| P00488    | Coagulation factor XIII A chain          | 83214   | 5.67    | 817.86     | 23       | 58                   | 43.44        | 6.64                           | 136      | 2                 | 20.17                         | 0.041                       |
| P37802    | Transgelin 2                             | 22377   | 8.45    | 1346.16    | 22       | 25                   | 94.47        | 6.37                           | 264      | 1                 | 18.09                         | 0.041                       |
| P02679    | Fibrinogen gamma chain                   | 51478   | 5.24    | 928.56     | 22       | 37                   | 64.24        | 7.58                           | 189      | 2                 | 16.75                         | 0.042                       |
| P14618    | Pyruvate kinase isozymes M1 M2           | 57900   | 7.75    | 611.71     | 21       | 43                   | 62.90        | 7.83                           | 136      | 2                 | 21.42                         | 0.046                       |
| P67936    | Tropomyosin alpha 4 chain                | 28504   | 4.47    | 633.97     | 20       | 29                   | 64.52        | 8.17                           | 158      | 1                 | 17.14                         | 0.037                       |
| P11142    | Heat shock cognate 71 kDa protein        | 70854   | 5.20    | 547.62     | 20       | 50                   | 40.25        | 10.33                          | 98       | 0                 | 18.67                         | 0.046                       |
| P06733    | Alpha enolase                            | 47139   | 7.17    | 497.44     | 20       | 31                   | 55.76        | 8.38                           | 122      | 2                 | 21.99                         | 0.045                       |
| P54652    | Heat shock related 70 kDa protein 2      | 69977   | 5.41    | 428.50     | 20       | 50                   | 43.35        | 9.76                           | 114      | 3                 | 22.45                         | 0.046                       |
| P68133    | Actin alpha skeletal muscle              | 42023   | 5.07    | 1426.92    | 19       | 34                   | 56.50        | 6.25                           | 257      | 3                 | 14.96                         | 0.036                       |
| Q9H4B7    | Tubulin beta 1 chain                     | 50294   | 4.88    | 1052.20    | 19       | 32                   | 74.28        | 7.14                           | 166      | 1                 | 17.56                         | 0.043                       |
| P08567    | Pleckstrin                               | 40071   | 8.34    | 827.11     | 18       | 27                   | 60.00        | 8.87                           | 171      | 2                 | 18.64                         | 0.040                       |
| Q562R1    | Beta actin like protein 2                | 41975   | 5.25    | 762.59     | 18       | 35                   | 65.69        | 7.97                           | 167      | 2                 | 19.02                         | 0.044                       |
| P34931    | Heat shock 70 kDa protein 1L             | 70331   | 5.65    | 455.92     | 18       | 48                   | 51.01        | 9.77                           | 111      | 1                 | 25.00                         | 0.049                       |
| Q01518    | Adenylyl cyclase associated protein 1    | 51822   | 8.13    | 427.89     | 18       | 44                   | 49.47        | 8.35                           | 101      | 1                 | 19.00                         | 0.048                       |
| Q9UBW5    | Bridging integrator 2                    | 61836   | 4.93    | 316.85     | 18       | 42                   | 58.41        | 10.19                          | 99       | 3                 | 22.83                         | 0.051                       |
| A5A3E0    | ANKRD26 like family C member 1B          | 121366  | 5.77    | 1186.61    | 17       | 101                  | 29.77        | 11.22                          | 165      | 4                 | 20.95                         | 0.044                       |
| Q15942    | Zyxin                                    | 61238   | 6.21    | 568.66     | 17       | 29                   | 50.35        | 6.36                           | 115      | 0                 | 18.25                         | 0.046                       |
| P00924    | Enolase 1                                | 46773   | 6.15    | 460.20     | 17       | 28                   | 47.83        | 10.89                          | 104      | 2                 | 19.84                         | 0.046                       |
| Q80930    | Regulatory protein E2                    | 45528   | 9.24    | 336.38     | 17       | 35                   | 52.78        | 6.65                           | 84       | 1                 | 21.59                         | 0.046                       |
| P04406    | Glyceraldehyde 3 phosphate dehydrogenase | 36030   | 8.70    | 1041.05    | 16       | 21                   | 63.88        | 9.35                           | 214      | 5                 | 16.65                         | 0.040                       |
| P09972    | Fructose bisphosphate aldolase C         | 39431   | 6.43    | 424.98     | 16       | 34                   | 57.69        | 7.86                           | 104      | 1                 | 23.46                         | 0.045                       |
| Q58FF3    | Putative endoplasmic like protein        | 45829   | 4.96    | 296.00     | 16       | 44                   | 53.38        | 11.30                          | 76       | 4                 | 23.67                         | 0.047                       |
| P50552    | Vasodilator stimulated phosphoprotein    | 39805   | 9.33    | 392.57     | 15       | 30                   | 56.32        | 7.92                           | 86       | 1                 | 22.98                         | 0.050                       |
| O00299    | Chloride intracellular channel protein 1 | 26905   | 4.90    | 253.60     | 15       | 20                   | 74.69        | 8.07                           | 88       | 1                 | 22.30                         | 0.049                       |
| P68032    | Actin alpha cardiac muscle 1             | 41991   | 5.07    | 1443.74    | 14       | 34                   | 44.30        | 4.68                           | 219      | 1                 | 13.73                         | 0.034                       |
| P06753    | Tropomyosin alpha 3 chain                | 32798   | 4.49    | 482.41     | 14       | 27                   | 40.85        | 10.38                          | 93       | 0                 | 16.03                         | 0.038                       |
| O95810    | Serum deprivation response protein       | 47144   | 4.96    | 469.59     | 14       | 28                   | 51.53        | 8.49                           | 100      | 0                 | 20.45                         | 0.045                       |
| P08107    | Heat shock 70 kDa protein 1              | 70009   | 5.32    | 459.25     | 14       | 49                   | 41.19        | 11.74                          | 95       | 5                 | 20.61                         | 0.051                       |

|        |                                               |       |      |         |    |    |       |       |     |   |       |       |
|--------|-----------------------------------------------|-------|------|---------|----|----|-------|-------|-----|---|-------|-------|
| O00151 | PDZ and LIM domain protein 1                  | 36049 | 6.60 | 458.88  | 14 | 21 | 65.96 | 6.98  | 109 | 1 | 22.06 | 0.048 |
| P60174 | Triosephosphate isomerase                     | 26652 | 6.50 | 268.39  | 14 | 21 | 63.05 | 7.74  | 92  | 1 | 23.29 | 0.046 |
| P62736 | Actin aortic smooth muscle                    | 41981 | 5.08 | 1406.37 | 13 | 34 | 36.07 | 4.64  | 210 | 0 | 13.44 | 0.033 |
| P63267 | Actin gamma enteric smooth muscle             | 41849 | 5.16 | 1376.89 | 13 | 33 | 42.02 | 5.61  | 223 | 3 | 14.05 | 0.036 |
| P60660 | Myosin light polypeptide 6                    | 16919 | 4.36 | 505.67  | 13 | 15 | 76.82 | 7.80  | 94  | 0 | 15.67 | 0.036 |
| P68871 | Hemoglobin subunit beta                       | 15988 | 6.88 | 1464.32 | 12 | 13 | 93.88 | 6.94  | 231 | 1 | 12.95 | 0.031 |
| P68366 | Tubulin alpha 4A chain                        | 49892 | 4.75 | 870.76  | 12 | 35 | 31.03 | 9.08  | 128 | 0 | 17.86 | 0.033 |
| P07437 | Tubulin beta chain                            | 49638 | 4.59 | 721.72  | 12 | 31 | 43.92 | 6.67  | 107 | 0 | 16.49 | 0.046 |
| P02042 | Hemoglobin subunit delta                      | 16045 | 8.24 | 602.41  | 12 | 13 | 80.27 | 6.67  | 124 | 1 | 17.14 | 0.038 |
| Q9BQE3 | Tubulin alpha 1C chain                        | 49863 | 4.79 | 563.43  | 12 | 35 | 43.21 | 7.68  | 103 | 2 | 20.10 | 0.038 |
| Q13418 | Integrin linked protein kinase                | 51385 | 8.02 | 429.19  | 12 | 40 | 54.87 | 8.02  | 68  | 2 | 23.11 | 0.047 |
| P62937 | Peptidyl prolyl cis trans isomerase A         | 18000 | 7.85 | 170.20  | 12 | 12 | 73.94 | 8.06  | 60  | 2 | 19.85 | 0.047 |
| P68363 | Tubulin alpha 1B chain                        | 50119 | 4.76 | 693.28  | 11 | 35 | 35.92 | 7.56  | 102 | 0 | 17.03 | 0.035 |
| P23528 | Cofilin 1                                     | 18490 | 8.22 | 556.52  | 11 | 19 | 61.45 | 8.51  | 103 | 2 | 18.47 | 0.041 |
| P63104 | 14 3 3 protein zeta delta                     | 27727 | 4.53 | 505.14  | 11 | 25 | 51.43 | 7.77  | 93  | 0 | 16.91 | 0.047 |
| Q13509 | Tubulin beta 3 chain                          | 50400 | 4.64 | 458.25  | 11 | 31 | 42.44 | 6.54  | 67  | 1 | 18.55 | 0.045 |
| P00338 | L lactate dehydrogenase A chain               | 36665 | 8.37 | 314.55  | 11 | 33 | 47.29 | 9.36  | 64  | 2 | 21.20 | 0.046 |
| P12605 | Fusion glycoprotein F0                        | 60747 | 7.33 | 185.00  | 11 | 39 | 27.21 | 9.59  | 58  | 1 | 22.04 | 0.046 |
| Q13885 | Tubulin beta 2A chain                         | 49874 | 4.59 | 606.91  | 10 | 31 | 37.75 | 8.58  | 81  | 0 | 21.49 | 0.045 |
| P04075 | Fructose bisphosphate aldolase A              | 39395 | 8.06 | 457.74  | 10 | 32 | 42.58 | 7.32  | 96  | 2 | 21.51 | 0.041 |
| Q3ZCM7 | Tubulin beta 8 chain                          | 49743 | 4.60 | 298.07  | 10 | 31 | 46.85 | 9.01  | 51  | 2 | 21.65 | 0.047 |
| P07737 | Profilin 1                                    | 15044 | 8.46 | 755.40  | 9  | 17 | 86.43 | 7.96  | 129 | 3 | 15.23 | 0.037 |
| Q71U36 | Tubulin alpha 1A chain                        | 50103 | 4.76 | 576.64  | 9  | 35 | 31.26 | 8.12  | 88  | 1 | 17.10 | 0.035 |
| P19105 | Myosin regulatory light chain MRLC3           | 19781 | 4.45 | 378.20  | 9  | 19 | 61.99 | 4.55  | 57  | 0 | 15.49 | 0.040 |
| P07195 | L lactate dehydrogenase B chain               | 36615 | 5.64 | 280.08  | 9  | 25 | 40.42 | 9.60  | 54  | 0 | 26.78 | 0.045 |
| P09486 | SPARC                                         | 34609 | 4.54 | 190.93  | 9  | 20 | 51.82 | 8.77  | 46  | 2 | 22.64 | 0.049 |
| P69905 | Hemoglobin subunit alpha                      | 15247 | 9.18 | 678.33  | 8  | 9  | 87.32 | 7.51  | 122 | 1 | 15.68 | 0.037 |
| Q9BYX7 | Kappa actin                                   | 41988 | 5.88 | 621.20  | 8  | 30 | 30.40 | 9.11  | 89  | 2 | 15.37 | 0.041 |
| P04350 | Tubulin beta 4 chain                          | 49553 | 4.59 | 557.46  | 8  | 31 | 29.73 | 9.23  | 72  | 0 | 19.89 | 0.043 |
| Q9NY65 | Tubulin alpha 8 chain                         | 50061 | 4.76 | 370.66  | 8  | 35 | 28.29 | 8.09  | 67  | 0 | 21.65 | 0.039 |
| P07951 | Tropomyosin beta chain                        | 32830 | 4.46 | 346.49  | 8  | 28 | 28.87 | 9.74  | 47  | 0 | 16.63 | 0.034 |
| P24844 | Myosin regulatory light polypeptide 9         | 19814 | 4.59 | 280.09  | 8  | 19 | 47.09 | 12.04 | 47  | 0 | 21.37 | 0.041 |
| P68371 | Tubulin beta 2C chain                         | 49799 | 4.60 | 615.92  | 7  | 31 | 27.19 | 4.74  | 68  | 0 | 18.06 | 0.044 |
| Q13748 | Tubulin alpha 3C D chain                      | 49927 | 4.80 | 465.29  | 7  | 35 | 33.33 | 8.81  | 71  | 1 | 18.23 | 0.040 |
| P02775 | Platelet basic protein                        | 13885 | 9.07 | 448.18  | 7  | 9  | 38.28 | 8.56  | 105 | 0 | 16.51 | 0.036 |
| Q9Y281 | Cofilin 2                                     | 18724 | 8.16 | 303.82  | 7  | 18 | 34.34 | 8.85  | 45  | 0 | 18.06 | 0.039 |
| P14649 | Myosin light chain 6B                         | 22749 | 5.42 | 224.12  | 7  | 18 | 37.50 | 8.41  | 49  | 0 | 19.53 | 0.042 |
| Q9BVA1 | Tubulin beta 2B chain                         | 49920 | 4.59 | 590.82  | 6  | 31 | 25.39 | 6.35  | 63  | 1 | 16.34 | 0.041 |
| Q6PEY2 | Tubulin alpha 3E chain                        | 49884 | 4.79 | 364.57  | 6  | 34 | 19.11 | 8.67  | 56  | 0 | 18.81 | 0.035 |
| P09493 | Tropomyosin alpha 1 chain                     | 32688 | 4.49 | 345.88  | 6  | 28 | 21.13 | 8.98  | 46  | 0 | 19.52 | 0.037 |
| Q15404 | Ras suppressor protein 1                      | 31520 | 9.14 | 316.98  | 6  | 23 | 46.21 | 8.67  | 53  | 0 | 20.96 | 0.035 |
| A6NNZ2 | Tubulin beta 8 chain B                        | 49540 | 4.56 | 244.48  | 6  | 28 | 18.92 | 11.96 | 35  | 1 | 23.02 | 0.043 |
| P69891 | Hemoglobin subunit gamma 1                    | 16130 | 6.78 | 177.21  | 6  | 13 | 56.46 | 8.34  | 46  | 1 | 21.57 | 0.041 |
| Q9UI15 | Transgelin 3                                  | 22458 | 7.17 | 165.84  | 6  | 18 | 43.72 | 7.41  | 47  | 1 | 23.72 | 0.046 |
| P13929 | Beta enolase                                  | 46957 | 7.66 | 124.14  | 6  | 28 | 20.74 | 7.93  | 29  | 0 | 24.01 | 0.048 |
| O14950 | Myosin regulatory light chain MRLC2           | 19766 | 4.49 | 368.10  | 5  | 19 | 50.58 | 6.60  | 48  | 2 | 15.66 | 0.040 |
| P24071 | Immunoglobulin alpha Fc receptor              | 32244 | 6.48 | 158.85  | 5  | 17 | 35.19 | 11.08 | 52  | 1 | 22.40 | 0.044 |
| Q9GZV4 | Eukaryotic translation initiation factor 5A 2 | 16782 | 5.24 | 101.18  | 5  | 15 | 73.86 | 10.01 | 30  | 2 | 24.01 | 0.053 |

|        |                                                             |       |      |        |   |    |       |       |    |   |       |       |
|--------|-------------------------------------------------------------|-------|------|--------|---|----|-------|-------|----|---|-------|-------|
| P02776 | Platelet factor 4                                           | 10837 | 8.78 | 357.25 | 4 | 7  | 35.64 | 6.39  | 45 | 0 | 14.56 | 0.030 |
| Q9H299 | SH3 domain binding glutamic acid rich like protein 3        | 10431 | 4.62 | 220.98 | 4 | 7  | 66.67 | 5.93  | 46 | 0 | 14.32 | 0.042 |
| P02100 | Hemoglobin subunit epsilon                                  | 16192 | 9.18 | 201.76 | 4 | 14 | 40.82 | 9.99  | 34 | 0 | 17.95 | 0.041 |
| P30041 | Peroxiredoxin 6                                             | 25019 | 5.96 | 164.92 | 4 | 28 | 31.70 | 7.11  | 27 | 1 | 22.26 | 0.049 |
| P10720 | Platelet factor 4 variant                                   | 11545 | 9.49 | 309.89 | 3 | 8  | 27.88 | 9.38  | 32 | 0 | 13.27 | 0.031 |
| A6NKZ8 | Putative tubulin beta chain like protein<br>ENSP00000290377 | 41748 | 4.57 | 184.45 | 3 | 24 | 21.24 | 7.77  | 29 | 2 | 22.34 | 0.035 |
| P69892 | Hemoglobin subunit gamma 2                                  | 16116 | 6.78 | 171.12 | 3 | 13 | 25.85 | 12.43 | 32 | 0 | 16.75 | 0.038 |
| Q9BUF5 | Tubulin beta 6 chain                                        | 49825 | 4.58 | 374.25 | 2 | 31 | 11.21 | 9.07  | 31 | 2 | 19.46 | 0.039 |
|        |                                                             |       |      |        |   |    |       |       |    |   |       |       |

**Healthy PLT LC-MS run 2: PLT\_sani\_290709\_02**

| Accession | Description                                       | mW (Da) | pI (pH) | PLGS Score | Peptides | Theoretical Peptides | Coverage (%) | Precursor RMS Mass Error (ppm) | Products | Modified Peptides | Products RMS Mass Error (ppm) | Products RMS RT Error (min) |
|-----------|---------------------------------------------------|---------|---------|------------|----------|----------------------|--------------|--------------------------------|----------|-------------------|-------------------------------|-----------------------------|
| P35579    | Myosin 9                                          | 226390  | 5.34    | 4023.88    | 114      | 164                  | 61.33        | 8.42                           | 912      | 7                 | 18.60                         | 0.042                       |
| P35749    | Myosin 11                                         | 227197  | 5.25    | 1483.73    | 68       | 161                  | 40.16        | 9.65                           | 349      | 5                 | 22.74                         | 0.046                       |
| P18206    | Vinculin                                          | 123721  | 5.35    | 2089.12    | 52       | 107                  | 60.32        | 8.79                           | 458      | 6                 | 17.86                         | 0.038                       |
| Q7Z406    | Myosin 14                                         | 227861  | 5.63    | 1420.94    | 49       | 173                  | 37.34        | 9.94                           | 299      | 10                | 24.18                         | 0.045                       |
| P07996    | Thrombospondin 1                                  | 129299  | 4.53    | 2190.13    | 49       | 101                  | 54.44        | 8.21                           | 434      | 1                 | 18.50                         | 0.040                       |
| P12814    | Alpha actinin 1                                   | 102992  | 5.09    | 1630.59    | 43       | 77                   | 60.31        | 9.77                           | 327      | 1                 | 20.13                         | 0.045                       |
| O43707    | Alpha actinin 4                                   | 104788  | 5.12    | 1228.13    | 35       | 87                   | 45.88        | 8.87                           | 224      | 2                 | 20.42                         | 0.048                       |
| P02768    | Serum albumin                                     | 69321   | 5.86    | 1018.06    | 34       | 55                   | 58.13        | 7.99                           | 279      | 3                 | 19.46                         | 0.038                       |
| Q86UX7    | Fermitin family homolog 3                         | 75905   | 6.54    | 857.72     | 29       | 45                   | 61.92        | 8.12                           | 194      | 2                 | 21.98                         | 0.041                       |
| P02671    | Fibrinogen alpha chain                            | 94914   | 5.61    | 773.15     | 29       | 59                   | 34.41        | 9.86                           | 195      | 3                 | 20.21                         | 0.042                       |
| P00488    | Coagulation factor XIII A chain                   | 83214   | 5.67    | 861.19     | 28       | 58                   | 55.87        | 7.97                           | 185      | 2                 | 19.85                         | 0.045                       |
| P02675    | Fibrinogen beta chain                             | 55892   | 8.25    | 720.17     | 27       | 42                   | 68.64        | 9.91                           | 204      | 3                 | 18.92                         | 0.041                       |
| P60709    | Actin cytoplasmic 1                               | 41709   | 5.14    | 2975.97    | 26       | 34                   | 69.60        | 6.66                           | 485      | 3                 | 13.79                         | 0.037                       |
| Q6S8J3    | ANKRD26 like family C member 1A                   | 121285  | 5.77    | 1507.47    | 25       | 101                  | 31.26        | 9.79                           | 248      | 8                 | 18.60                         | 0.043                       |
| P08514    | Integrin alpha IIb                                | 113319  | 5.04    | 535.39     | 25       | 53                   | 29.93        | 10.26                          | 122      | 2                 | 24.40                         | 0.046                       |
| P11021    | 78 kDa glucose regulated protein                  | 72288   | 4.87    | 429.38     | 24       | 52                   | 39.14        | 10.11                          | 123      | 2                 | 22.99                         | 0.045                       |
| P06733    | Alpha enolase                                     | 47139   | 7.17    | 551.81     | 24       | 31                   | 62.21        | 10.05                          | 139      | 0                 | 21.85                         | 0.047                       |
| P50552    | Vasodilator stimulated phosphoprotein             | 39805   | 9.33    | 440.60     | 23       | 30                   | 58.42        | 7.59                           | 119      | 1                 | 22.20                         | 0.043                       |
| P11142    | Heat shock cognate 71 kDa protein                 | 70854   | 5.20    | 616.84     | 23       | 50                   | 44.74        | 8.32                           | 142      | 4                 | 23.31                         | 0.048                       |
| P06396    | Gelsolin                                          | 85644   | 5.84    | 892.12     | 23       | 51                   | 53.20        | 9.07                           | 188      | 2                 | 18.16                         | 0.045                       |
| P02679    | Fibrinogen gamma chain                            | 51478   | 5.24    | 970.54     | 23       | 37                   | 63.36        | 8.43                           | 205      | 5                 | 17.21                         | 0.042                       |
| Q6Q0C0    | E3 ubiquitin protein ligase TRAF7                 | 74560   | 6.75    | 432.03     | 21       | 51                   | 44.33        | 11.97                          | 98       | 3                 | 26.09                         | 0.049                       |
| P63261    | Actin cytoplasmic 2                               | 41765   | 5.16    | 2989.25    | 21       | 34                   | 81.87        | 6.56                           | 476      | 3                 | 13.90                         | 0.035                       |
| P04406    | Glyceraldehyde 3 phosphate dehydrogenase          | 36030   | 8.70    | 894.66     | 21       | 21                   | 68.96        | 7.57                           | 173      | 2                 | 16.58                         | 0.042                       |
| Q05209    | Tyrosine protein phosphatase non receptor type 12 | 88065   | 5.27    | 504.43     | 20       | 65                   | 37.69        | 10.98                          | 107      | 2                 | 27.11                         | 0.045                       |
| P54652    | Heat shock related 70 kDa protein 2               | 69977   | 5.41    | 512.19     | 20       | 50                   | 42.10        | 9.18                           | 114      | 1                 | 20.27                         | 0.046                       |
| P14618    | Pyruvate kinase isozymes M1 M2                    | 57900   | 7.75    | 555.67     | 20       | 43                   | 48.21        | 5.72                           | 132      | 3                 | 21.42                         | 0.049                       |
| O95810    | Serum deprivation response protein                | 47144   | 4.96    | 539.22     | 20       | 28                   | 57.88        | 8.39                           | 153      | 4                 | 20.54                         | 0.046                       |
| Q9H4B7    | Tubulin beta 1 chain                              | 50294   | 4.88    | 971.75     | 18       | 32                   | 67.18        | 8.40                           | 186      | 3                 | 18.09                         | 0.044                       |
| Q562R1    | Beta actin like protein 2                         | 41975   | 5.25    | 762.69     | 18       | 35                   | 73.67        | 8.89                           | 172      | 4                 | 20.11                         | 0.037                       |
| P34931    | Heat shock 70 kDa protein 1L                      | 70331   | 5.65    | 475.28     | 18       | 48                   | 38.69        | 11.56                          | 91       | 2                 | 22.64                         | 0.045                       |
| P37802    | Transgelin 2                                      | 22377   | 8.45    | 1066.15    | 17       | 25                   | 89.45        | 6.69                           | 211      | 2                 | 17.63                         | 0.042                       |
| P68366    | Tubulin alpha 4A chain                            | 49892   | 4.75    | 812.76     | 16       | 35                   | 56.03        | 9.04                           | 144      | 0                 | 18.25                         | 0.038                       |
| P68032    | Actin alpha cardiac muscle 1                      | 41991   | 5.07    | 1395.33    | 15       | 34                   | 51.19        | 7.10                           | 248      | 3                 | 15.13                         | 0.035                       |

|        |                                                      |        |      |         |    |     |       |       |     |   |       |       |
|--------|------------------------------------------------------|--------|------|---------|----|-----|-------|-------|-----|---|-------|-------|
| P60660 | Myosin light polypeptide 6                           | 16919  | 4.36 | 439.40  | 15 | 15  | 90.73 | 10.52 | 114 | 2 | 20.76 | 0.041 |
| P08567 | Pleckstrin                                           | 40071  | 8.34 | 845.97  | 15 | 27  | 51.71 | 9.07  | 149 | 1 | 21.01 | 0.041 |
| Q15942 | Zyxin                                                | 61238  | 6.21 | 555.04  | 14 | 29  | 46.33 | 5.78  | 146 | 6 | 18.99 | 0.045 |
| Q01518 | Adenylyl cyclase associated protein 1                | 51822  | 8.13 | 488.75  | 14 | 44  | 37.68 | 6.78  | 89  | 0 | 18.29 | 0.045 |
| P67936 | Tropomyosin alpha 4 chain                            | 28504  | 4.47 | 527.37  | 14 | 29  | 45.56 | 5.81  | 126 | 0 | 15.21 | 0.039 |
| P09972 | Fructose bisphosphate aldolase C                     | 39431  | 6.43 | 375.11  | 14 | 34  | 59.34 | 9.76  | 93  | 2 | 24.70 | 0.052 |
| P06753 | Tropomyosin alpha 3 chain                            | 32798  | 4.49 | 307.56  | 14 | 27  | 40.85 | 10.79 | 81  | 1 | 18.96 | 0.044 |
| Q9BQE3 | Tubulin alpha 1C chain                               | 49863  | 4.79 | 542.22  | 13 | 35  | 45.21 | 8.56  | 103 | 1 | 17.33 | 0.041 |
| P68871 | Hemoglobin subunit beta                              | 15988  | 6.88 | 1509.88 | 13 | 13  | 93.88 | 8.51  | 271 | 1 | 13.53 | 0.032 |
| P63104 | 14 3 3 protein zeta delta                            | 27727  | 4.53 | 586.45  | 13 | 25  | 57.14 | 8.75  | 113 | 2 | 19.37 | 0.041 |
| Q8IZ40 | REST corepressor 2                                   | 57976  | 9.35 | 243.98  | 12 | 41  | 35.37 | 10.51 | 74  | 3 | 24.18 | 0.045 |
| P19105 | Myosin regulatory light chain MRLC3                  | 19781  | 4.45 | 487.34  | 12 | 19  | 77.19 | 7.68  | 79  | 0 | 19.51 | 0.048 |
| P07737 | Profilin 1                                           | 15044  | 8.46 | 655.94  | 12 | 17  | 90.71 | 7.92  | 126 | 1 | 13.99 | 0.036 |
| P02042 | Hemoglobin subunit delta                             | 16045  | 8.24 | 616.79  | 12 | 13  | 83.67 | 8.74  | 126 | 1 | 16.63 | 0.038 |
| A5A3E0 | ANKRD26 like family C member 1B                      | 121366 | 5.77 | 1272.78 | 12 | 101 | 23.72 | 11.87 | 157 | 6 | 19.29 | 0.038 |
| P68363 | Tubulin alpha 1B chain                               | 50119  | 4.76 | 684.34  | 11 | 35  | 38.14 | 7.67  | 106 | 0 | 16.07 | 0.040 |
| P68133 | Actin alpha skeletal muscle                          | 42023  | 5.07 | 1394.53 | 11 | 34  | 38.73 | 4.32  | 217 | 2 | 14.88 | 0.033 |
| Q9BYX7 | Kappa actin                                          | 41988  | 5.88 | 611.93  | 10 | 30  | 54.67 | 9.03  | 105 | 5 | 17.00 | 0.039 |
| P69905 | Hemoglobin subunit alpha                             | 15247  | 9.18 | 542.41  | 10 | 9   | 90.85 | 9.34  | 106 | 0 | 19.08 | 0.035 |
| P62736 | Actin aortic smooth muscle                           | 41981  | 5.08 | 1359.31 | 10 | 34  | 46.42 | 4.81  | 208 | 2 | 13.69 | 0.030 |
| P08107 | Heat shock 70 kDa protein 1                          | 70009  | 5.32 | 466.36  | 10 | 49  | 34.01 | 12.90 | 87  | 4 | 25.91 | 0.048 |
| P07437 | Tubulin beta chain                                   | 49638  | 4.59 | 490.23  | 10 | 31  | 43.69 | 9.23  | 75  | 0 | 16.88 | 0.047 |
| P04075 | Fructose bisphosphate aldolase A                     | 39395  | 8.06 | 480.55  | 10 | 32  | 51.65 | 7.05  | 105 | 4 | 20.05 | 0.044 |
| Q9NY65 | Tubulin alpha 8 chain                                | 50061  | 4.76 | 353.78  | 9  | 35  | 34.52 | 10.45 | 72  | 1 | 21.40 | 0.040 |
| Q99867 | Putative tubulin beta 4q chain                       | 48403  | 4.95 | 341.56  | 9  | 32  | 39.17 | 9.84  | 68  | 1 | 23.47 | 0.043 |
| Q13885 | Tubulin beta 2A chain                                | 49874  | 4.59 | 448.66  | 9  | 31  | 32.13 | 9.52  | 59  | 0 | 17.45 | 0.049 |
| P68371 | Tubulin beta 2C chain                                | 49799  | 4.60 | 450.00  | 9  | 31  | 37.08 | 5.96  | 71  | 0 | 17.66 | 0.046 |
| P23528 | Cofilin 1                                            | 18490  | 8.22 | 515.34  | 9  | 19  | 56.63 | 7.17  | 76  | 0 | 13.46 | 0.046 |
| Q15404 | Ras suppressor protein 1                             | 31520  | 9.14 | 241.86  | 8  | 23  | 58.12 | 11.23 | 58  | 1 | 21.83 | 0.041 |
| P04350 | Tubulin beta 4 chain                                 | 49553  | 4.59 | 427.39  | 8  | 31  | 32.66 | 6.46  | 58  | 0 | 18.97 | 0.043 |
| Q6PEY2 | Tubulin alpha 3E chain                               | 49884  | 4.79 | 289.64  | 7  | 34  | 29.33 | 8.48  | 62  | 0 | 17.66 | 0.038 |
| P24844 | Myosin regulatory light polypeptide 9                | 19814  | 4.59 | 394.13  | 7  | 19  | 55.81 | 10.05 | 56  | 2 | 18.90 | 0.048 |
| O14950 | Myosin regulatory light chain MRLC2                  | 19766  | 4.49 | 497.36  | 7  | 19  | 55.23 | 6.79  | 65  | 2 | 18.41 | 0.044 |
| Q9BVA1 | Tubulin beta 2B chain                                | 49920  | 4.59 | 448.66  | 6  | 31  | 26.97 | 11.13 | 57  | 1 | 16.68 | 0.047 |
| Q3ZCM7 | Tubulin beta 8 chain                                 | 49743  | 4.60 | 334.97  | 6  | 31  | 35.59 | 8.44  | 55  | 3 | 23.02 | 0.045 |
| Q13509 | Tubulin beta 3 chain                                 | 50400  | 4.64 | 445.13  | 6  | 31  | 24.00 | 6.57  | 50  | 0 | 18.23 | 0.045 |
| P02775 | Platelet basic protein                               | 13885  | 9.07 | 496.12  | 6  | 9   | 38.28 | 4.87  | 86  | 0 | 15.26 | 0.036 |
| Q9Y281 | Cofilin 2                                            | 18724  | 8.16 | 250.68  | 5  | 18  | 37.95 | 7.30  | 27  | 0 | 16.45 | 0.045 |
| Q9BUF5 | Tubulin beta 6 chain                                 | 49825  | 4.58 | 292.16  | 5  | 31  | 23.77 | 10.81 | 50  | 3 | 18.80 | 0.045 |
| P69891 | Hemoglobin subunit gamma 1                           | 16130  | 6.78 | 190.39  | 5  | 13  | 50.34 | 8.01  | 45  | 1 | 17.08 | 0.041 |
| P02776 | Platelet factor 4                                    | 10837  | 8.78 | 449.66  | 5  | 7   | 36.63 | 8.48  | 58  | 0 | 15.01 | 0.031 |
| P00918 | Carbonic anhydrase 2                                 | 29227  | 7.03 | 182.82  | 5  | 19  | 34.62 | 6.53  | 26  | 0 | 19.16 | 0.044 |
| A6NNZ2 | Tubulin beta 8 chain B                               | 49540  | 4.56 | 293.16  | 5  | 28  | 27.93 | 8.70  | 49  | 1 | 18.08 | 0.045 |
| Q9H299 | SH3 domain binding glutamic acid rich like protein 3 | 10431  | 4.62 | 270.14  | 4  | 7   | 63.44 | 6.10  | 50  | 1 | 19.17 | 0.043 |
| P69892 | Hemoglobin subunit gamma 2                           | 16116  | 6.78 | 184.70  | 4  | 13  | 36.73 | 9.25  | 38  | 1 | 19.12 | 0.036 |
| P14649 | Myosin light chain 6B                                | 22749  | 5.42 | 208.98  | 4  | 18  | 25.48 | 7.54  | 36  | 2 | 15.55 | 0.042 |
| P10720 | Platelet factor 4 variant                            | 11545  | 9.49 | 297.09  | 3  | 8   | 27.88 | 6.27  | 33  | 0 | 13.88 | 0.024 |
| Q8NGU1 | Putative olfactory receptor 9A1                      | 29526  | 7.37 | 168.08  | 2  | 12  | 9.13  | 9.49  | 29  | 1 | 21.87 | 0.042 |



**Healthy PLT LC-MS run 3: PLT\_sani\_290709\_03**

| Accession | Description                                           | mW (Da) | pI (pH) | PLGS Score | Peptides | Theoretical Peptides | Coverage (%) | Precursor RMS Mass Error (ppm) | Products | Modified Peptides | Products RMS Mass Error (ppm) | Products RMS RT Error (min) |
|-----------|-------------------------------------------------------|---------|---------|------------|----------|----------------------|--------------|--------------------------------|----------|-------------------|-------------------------------|-----------------------------|
| P35579    | Myosin 9                                              | 226390  | 5.34    | 4097.94    | 114      | 164                  | 57.30        | 7.00                           | 913      | 12                | 17.48                         | 0.036                       |
| P35749    | Myosin 11                                             | 227197  | 5.25    | 1598.09    | 73       | 161                  | 39.40        | 9.89                           | 416      | 8                 | 22.92                         | 0.039                       |
| P35580    | Myosin 10                                             | 228856  | 5.27    | 1592.00    | 67       | 164                  | 43.47        | 9.29                           | 405      | 12                | 22.41                         | 0.037                       |
| Q7Z406    | Myosin 14                                             | 227861  | 5.63    | 1663.22    | 62       | 173                  | 39.00        | 10.75                          | 356      | 6                 | 22.84                         | 0.039                       |
| P18206    | Vinculin                                              | 123721  | 5.35    | 2245.82    | 62       | 107                  | 64.02        | 8.63                           | 520      | 7                 | 18.30                         | 0.034                       |
| P07996    | Thrombospondin 1                                      | 129299  | 4.53    | 2156.48    | 46       | 101                  | 49.06        | 8.16                           | 441      | 5                 | 18.62                         | 0.034                       |
| P12814    | Alpha actinin 1                                       | 102992  | 5.09    | 1519.69    | 41       | 77                   | 62.89        | 10.07                          | 344      | 10                | 19.45                         | 0.036                       |
| Q14185    | Dedicator of cytokinesis protein 1                    | 215207  | 7.26    | 991.63     | 39       | 153                  | 26.06        | 10.99                          | 209      | 10                | 23.61                         | 0.040                       |
| A5A3E0    | ANKRD26 like family C member 1B                       | 121366  | 5.77    | 1303.00    | 37       | 101                  | 41.30        | 9.95                           | 263      | 7                 | 20.00                         | 0.037                       |
| Q86UX7    | Fermitin family homolog 3                             | 75905   | 6.54    | 717.67     | 35       | 45                   | 67.17        | 8.76                           | 206      | 1                 | 21.36                         | 0.033                       |
| P02675    | Fibrinogen beta chain                                 | 55892   | 8.25    | 814.15     | 33       | 42                   | 78.41        | 9.70                           | 255      | 5                 | 19.62                         | 0.036                       |
| P02768    | Serum albumin                                         | 69321   | 5.86    | 1230.01    | 32       | 55                   | 60.43        | 9.49                           | 294      | 4                 | 17.55                         | 0.035                       |
| O43707    | Alpha actinin 4                                       | 104788  | 5.12    | 1246.60    | 32       | 87                   | 48.08        | 9.05                           | 218      | 2                 | 22.35                         | 0.037                       |
| P00488    | Coagulation factor XIII A chain                       | 83214   | 5.67    | 794.05     | 31       | 58                   | 54.51        | 7.56                           | 196      | 3                 | 19.84                         | 0.036                       |
| P02671    | Fibrinogen alpha chain                                | 94914   | 5.61    | 975.31     | 28       | 59                   | 39.84        | 7.06                           | 231      | 4                 | 18.84                         | 0.038                       |
| P60709    | Actin cytoplasmic 1                                   | 41709   | 5.14    | 2612.17    | 27       | 34                   | 76.80        | 6.78                           | 510      | 4                 | 14.62                         | 0.031                       |
| P06396    | Gelsolin                                              | 85644   | 5.84    | 912.88     | 26       | 51                   | 47.06        | 9.22                           | 243      | 4                 | 20.28                         | 0.036                       |
| P02679    | Fibrinogen gamma chain                                | 51478   | 5.24    | 935.04     | 24       | 37                   | 59.38        | 9.89                           | 210      | 1                 | 17.92                         | 0.035                       |
| Q9H4B7    | Tubulin beta 1 chain                                  | 50294   | 4.88    | 1078.28    | 23       | 32                   | 79.82        | 6.67                           | 197      | 4                 | 17.69                         | 0.033                       |
| P34931    | Heat shock 70 kDa protein 1L                          | 70331   | 5.65    | 378.90     | 22       | 48                   | 41.03        | 9.40                           | 133      | 3                 | 25.08                         | 0.037                       |
| P63261    | Actin cytoplasmic 2                                   | 41765   | 5.16    | 2617.92    | 22       | 34                   | 73.33        | 6.33                           | 451      | 6                 | 14.58                         | 0.030                       |
| Q01518    | Adenylyl cyclase associated protein 1                 | 51822   | 8.13    | 426.71     | 21       | 44                   | 52.84        | 8.29                           | 127      | 2                 | 20.18                         | 0.036                       |
| P54652    | Heat shock related 70 kDa protein 2                   | 69977   | 5.41    | 377.90     | 21       | 50                   | 39.12        | 9.12                           | 115      | 2                 | 22.99                         | 0.043                       |
| P08567    | Pleckstrin                                            | 40071   | 8.34    | 934.51     | 21       | 27                   | 58.57        | 7.98                           | 181      | 2                 | 19.24                         | 0.036                       |
| Q562R1    | Beta actin like protein 2                             | 41975   | 5.25    | 793.00     | 20       | 35                   | 63.83        | 10.91                          | 180      | 4                 | 17.60                         | 0.035                       |
| P11142    | Heat shock cognate 71 kDa protein                     | 70854   | 5.20    | 520.18     | 19       | 50                   | 37.31        | 8.52                           | 88       | 0                 | 20.15                         | 0.036                       |
| P06753    | Tropomyosin alpha 3 chain                             | 32798   | 4.49    | 326.76     | 19       | 27                   | 53.52        | 9.30                           | 95       | 0                 | 20.54                         | 0.036                       |
| P06733    | Alpha enolase                                         | 47139   | 7.17    | 539.92     | 19       | 31                   | 60.83        | 7.78                           | 131      | 3                 | 18.30                         | 0.036                       |
| Q6S8J3    | ANKRD26 like family C member 1A                       | 121285  | 5.77    | 1470.81    | 18       | 101                  | 23.44        | 9.53                           | 172      | 1                 | 17.54                         | 0.033                       |
| P04406    | Glyceraldehyde 3 phosphate dehydrogenase              | 36030   | 8.70    | 929.92     | 18       | 21                   | 67.76        | 8.29                           | 182      | 4                 | 17.21                         | 0.032                       |
| P67936    | Tropomyosin alpha 4 chain                             | 28504   | 4.47    | 581.39     | 18       | 29                   | 57.66        | 7.15                           | 146      | 2                 | 17.82                         | 0.033                       |
| Q9UBW5    | Bridging integrator 2                                 | 61836   | 4.93    | 463.25     | 18       | 42                   | 56.28        | 10.66                          | 149      | 5                 | 21.69                         | 0.040                       |
| P11021    | 78 kDa glucose regulated protein                      | 72288   | 4.87    | 360.85     | 18       | 52                   | 34.40        | 10.65                          | 100      | 2                 | 22.30                         | 0.038                       |
| P68133    | Actin alpha skeletal muscle                           | 42023   | 5.07    | 1523.28    | 18       | 34                   | 54.91        | 7.54                           | 276      | 2                 | 15.06                         | 0.032                       |
| O00151    | PDZ and LIM domain protein 1                          | 36049   | 6.60    | 443.26     | 17       | 21                   | 76.90        | 8.09                           | 118      | 3                 | 22.34                         | 0.034                       |
| Q9BQE3    | Tubulin alpha 1C chain                                | 49863   | 4.79    | 629.98     | 16       | 35                   | 51.22        | 7.10                           | 133      | 1                 | 20.08                         | 0.037                       |
| Q15942    | Zyxin                                                 | 61238   | 6.21    | 517.14     | 16       | 29                   | 51.22        | 7.46                           | 120      | 2                 | 19.47                         | 0.038                       |
| Q6NUK1    | Calcium binding mitochondrial carrier protein SCaMC 1 | 53320   | 5.93    | 291.73     | 16       | 39                   | 40.25        | 9.77                           | 86       | 1                 | 22.08                         | 0.043                       |
| P68366    | Tubulin alpha 4A chain                                | 49892   | 4.75    | 964.94     | 16       | 35                   | 55.13        | 5.63                           | 165      | 0                 | 17.90                         | 0.035                       |
| P62736    | Actin aortic smooth muscle                            | 41981   | 5.08    | 1535.42    | 15       | 34                   | 48.28        | 7.75                           | 240      | 0                 | 14.06                         | 0.031                       |
| P63267    | Actin gamma enteric smooth muscle                     | 41849   | 5.16    | 1502.74    | 15       | 33                   | 45.21        | 7.94                           | 240      | 1                 | 14.16                         | 0.031                       |
| P37802    | Transgelin 2                                          | 22377   | 8.45    | 1125.64    | 15       | 25                   | 86.43        | 5.32                           | 189      | 1                 | 15.73                         | 0.033                       |
| P00924    | Enolase 1                                             | 46773   | 6.15    | 670.45     | 15       | 28                   | 44.16        | 8.88                           | 150      | 5                 | 19.13                         | 0.036                       |
| Q13885    | Tubulin beta 2A chain                                 | 49874   | 4.59    | 521.90     | 15       | 31                   | 47.87        | 9.94                           | 113      | 2                 | 20.68                         | 0.034                       |

|        |                                                          |       |      |         |    |    |       |       |     |   |       |       |
|--------|----------------------------------------------------------|-------|------|---------|----|----|-------|-------|-----|---|-------|-------|
| P68032 | Actin alpha cardiac muscle 1                             | 41991 | 5.07 | 1570.23 | 15 | 34 | 48.28 | 7.65  | 244 | 1 | 13.98 | 0.032 |
| P04075 | Fructose bisphosphate aldolase A                         | 39395 | 8.06 | 506.85  | 14 | 32 | 58.24 | 8.12  | 113 | 3 | 18.94 | 0.031 |
| O95810 | Serum deprivation response protein                       | 47144 | 4.96 | 494.36  | 14 | 28 | 49.88 | 8.53  | 117 | 2 | 17.85 | 0.036 |
| P63104 | 14 3 3 protein zeta delta                                | 27727 | 4.53 | 574.04  | 14 | 25 | 51.84 | 7.76  | 123 | 1 | 19.69 | 0.036 |
| Q13418 | Integrin linked protein kinase                           | 51385 | 8.02 | 406.34  | 13 | 40 | 44.91 | 5.82  | 53  | 0 | 22.77 | 0.042 |
| P50552 | Vasodilator stimulated phosphoprotein                    | 39805 | 9.33 | 397.66  | 13 | 30 | 34.21 | 8.85  | 88  | 1 | 22.10 | 0.037 |
| P68871 | Hemoglobin subunit beta                                  | 15988 | 6.88 | 1363.60 | 13 | 13 | 93.88 | 7.96  | 273 | 2 | 13.79 | 0.031 |
| O00299 | Chloride intracellular channel protein 1                 | 26905 | 4.90 | 336.74  | 12 | 20 | 68.88 | 6.39  | 85  | 1 | 20.95 | 0.034 |
| P00338 | L lactate dehydrogenase A chain                          | 36665 | 8.37 | 309.23  | 12 | 33 | 39.76 | 9.50  | 60  | 0 | 20.94 | 0.039 |
| P68363 | Tubulin alpha 1B chain                                   | 50119 | 4.76 | 845.35  | 12 | 35 | 40.13 | 4.31  | 133 | 0 | 17.72 | 0.036 |
| P60660 | Myosin light polypeptide 6                               | 16919 | 4.36 | 588.86  | 11 | 15 | 61.59 | 5.82  | 124 | 2 | 16.98 | 0.035 |
| P04350 | Tubulin beta 4 chain                                     | 49553 | 4.59 | 471.52  | 11 | 31 | 48.42 | 7.89  | 87  | 2 | 16.71 | 0.033 |
| Q9NY65 | Tubulin alpha 8 chain                                    | 50061 | 4.76 | 451.67  | 11 | 35 | 41.43 | 7.78  | 101 | 2 | 20.25 | 0.038 |
| Q99867 | Putative tubulin beta 4q chain                           | 48403 | 4.95 | 366.36  | 11 | 32 | 35.48 | 9.40  | 75  | 2 | 23.36 | 0.032 |
| O94888 | UBX domain containing protein 7                          | 54828 | 4.89 | 270.18  | 11 | 36 | 38.85 | 10.38 | 83  | 3 | 24.82 | 0.039 |
| P07437 | Tubulin beta chain                                       | 49638 | 4.59 | 633.48  | 11 | 31 | 47.07 | 6.97  | 103 | 2 | 15.45 | 0.031 |
| P68371 | Tubulin beta 2C chain                                    | 49799 | 4.60 | 536.10  | 10 | 31 | 44.94 | 6.14  | 79  | 1 | 17.44 | 0.032 |
| P19105 | Myosin regulatory light chain MRLC3                      | 19781 | 4.45 | 469.56  | 10 | 19 | 80.12 | 6.95  | 76  | 0 | 18.55 | 0.036 |
| P09972 | Fructose bisphosphate aldolase C                         | 39431 | 6.43 | 367.24  | 10 | 34 | 31.87 | 10.13 | 61  | 0 | 19.80 | 0.035 |
| P31146 | Coronin 1A                                               | 50993 | 6.24 | 307.79  | 10 | 36 | 35.14 | 9.84  | 74  | 2 | 22.47 | 0.037 |
| Q15404 | Ras suppressor protein 1                                 | 31520 | 9.14 | 262.56  | 10 | 23 | 46.93 | 9.74  | 59  | 0 | 22.24 | 0.034 |
| P07737 | Profilin 1                                               | 15044 | 8.46 | 637.45  | 10 | 17 | 80.00 | 7.07  | 110 | 1 | 15.96 | 0.030 |
| Q13748 | Tubulin alpha 3C D chain                                 | 49927 | 4.80 | 566.27  | 9  | 35 | 36.00 | 5.67  | 97  | 1 | 19.09 | 0.037 |
| Q9BVA1 | Tubulin beta 2B chain                                    | 49920 | 4.59 | 538.48  | 9  | 31 | 36.63 | 7.64  | 75  | 0 | 15.68 | 0.030 |
| Q13509 | Tubulin beta 3 chain                                     | 50400 | 4.64 | 427.05  | 9  | 31 | 32.89 | 11.47 | 52  | 0 | 22.66 | 0.033 |
| P24844 | Myosin regulatory light polypeptide 9                    | 19814 | 4.59 | 372.34  | 9  | 19 | 70.35 | 11.56 | 72  | 2 | 18.99 | 0.037 |
| Q3ZCM7 | Tubulin beta 8 chain                                     | 49743 | 4.60 | 331.96  | 9  | 31 | 32.66 | 11.39 | 63  | 2 | 18.26 | 0.036 |
| Q9HB11 | Beta parvin                                              | 41688 | 6.26 | 227.91  | 9  | 29 | 39.84 | 11.18 | 64  | 4 | 22.73 | 0.037 |
| P28065 | Proteasome subunit beta type 9                           | 23249 | 4.71 | 216.37  | 9  | 16 | 60.27 | 8.24  | 76  | 2 | 23.21 | 0.037 |
| P09417 | Dihydropteridine reductase                               | 25773 | 7.17 | 142.11  | 9  | 19 | 50.82 | 12.74 | 60  | 3 | 23.54 | 0.043 |
| P23528 | Cofilin 1                                                | 18490 | 8.22 | 582.62  | 9  | 19 | 56.02 | 7.39  | 84  | 0 | 14.99 | 0.037 |
| P02042 | Hemoglobin subunit delta                                 | 16045 | 8.24 | 526.46  | 8  | 13 | 82.31 | 7.55  | 107 | 3 | 13.01 | 0.031 |
| Q9BUF5 | Tubulin beta 6 chain                                     | 49825 | 4.58 | 337.36  | 8  | 31 | 34.08 | 9.45  | 64  | 4 | 18.45 | 0.033 |
| P62937 | Peptidyl prolyl cis trans isomerase A                    | 18000 | 7.85 | 245.52  | 8  | 12 | 57.58 | 8.13  | 50  | 1 | 19.89 | 0.034 |
| P69891 | Hemoglobin subunit gamma 1                               | 16130 | 6.78 | 211.20  | 8  | 13 | 58.50 | 6.57  | 49  | 0 | 19.06 | 0.036 |
| P69905 | Hemoglobin subunit alpha                                 | 15247 | 9.18 | 625.65  | 8  | 9  | 89.44 | 9.16  | 110 | 0 | 14.16 | 0.026 |
| Q9BYX7 | Kappa actin                                              | 41988 | 5.88 | 587.88  | 7  | 30 | 34.40 | 8.64  | 79  | 2 | 16.40 | 0.033 |
| Q6PEY2 | Tubulin alpha 3E chain                                   | 49884 | 4.79 | 388.55  | 7  | 34 | 31.11 | 5.83  | 66  | 0 | 19.28 | 0.037 |
| P07951 | Tropomyosin beta chain                                   | 32830 | 4.46 | 328.07  | 7  | 28 | 27.46 | 9.43  | 52  | 0 | 19.64 | 0.032 |
| P60174 | Triosephosphate isomerase                                | 26652 | 6.50 | 294.15  | 7  | 21 | 47.39 | 4.85  | 61  | 2 | 20.26 | 0.040 |
| P14649 | Myosin light chain 6B                                    | 22749 | 5.42 | 264.54  | 7  | 18 | 47.12 | 9.90  | 61  | 2 | 21.99 | 0.038 |
| Q9BV86 | Methyltransferase like protein 11A                       | 25370 | 5.16 | 152.80  | 7  | 21 | 37.22 | 11.84 | 41  | 1 | 24.60 | 0.040 |
| P02775 | Platelet basic protein                                   | 13885 | 9.07 | 640.33  | 7  | 9  | 38.28 | 7.00  | 92  | 0 | 12.45 | 0.027 |
| Q9Y281 | Cofilin 2                                                | 18724 | 8.16 | 362.79  | 6  | 18 | 47.59 | 9.48  | 50  | 1 | 18.05 | 0.043 |
| A6NKZ8 | Putative tubulin beta chain like protein ENSP00000290377 | 41748 | 4.57 | 300.38  | 6  | 24 | 26.08 | 5.04  | 44  | 1 | 18.97 | 0.028 |
| P09493 | Tropomyosin alpha 1 chain                                | 32688 | 4.49 | 297.08  | 6  | 28 | 21.83 | 10.78 | 52  | 0 | 19.07 | 0.032 |
| O14950 | Myosin regulatory light chain MRLC2                      | 19766 | 4.49 | 469.56  | 6  | 19 | 51.74 | 6.63  | 59  | 1 | 16.15 | 0.036 |

|        |                                                      |       |      |        |   |    |       |      |    |   |       |       |
|--------|------------------------------------------------------|-------|------|--------|---|----|-------|------|----|---|-------|-------|
| P07195 | L lactate dehydrogenase B chain                      | 36615 | 5.64 | 271.89 | 5 | 25 | 18.26 | 6.17 | 24 | 0 | 25.60 | 0.035 |
| Q9H299 | SH3 domain binding glutamic acid rich like protein 3 | 10431 | 4.62 | 159.55 | 5 | 7  | 69.89 | 8.56 | 42 | 0 | 15.07 | 0.042 |
| A6NNZ2 | Tubulin beta 8 chain B                               | 49540 | 4.56 | 306.39 | 5 | 28 | 17.79 | 8.74 | 35 | 1 | 14.39 | 0.028 |
| P69892 | Hemoglobin subunit gamma 2                           | 16116 | 6.78 | 207.79 | 4 | 13 | 32.65 | 2.89 | 46 | 0 | 19.47 | 0.037 |
| P02776 | Platelet factor 4                                    | 10837 | 8.78 | 264.02 | 4 | 7  | 35.64 | 5.43 | 37 | 0 | 13.64 | 0.028 |
| P02100 | Hemoglobin subunit epsilon                           | 16192 | 9.18 | 224.11 | 3 | 14 | 12.93 | 3.20 | 28 | 0 | 14.52 | 0.036 |
|        |                                                      |       |      |        |   |    |       |      |    |   |       |       |

**Cystic fibrosis PLT LC-MS run 1: PLT\_CF\_290709\_01**

| Accession | Description                              | mW (Da) | pI (pH) | PLGS Score | Peptides | Theoretical Peptides | Coverage (%) | Precursor RMS Mass Error (ppm) | Products | Modified Peptides | Products RMS Mass Error (ppm) | Products RMS RT Error (min) |
|-----------|------------------------------------------|---------|---------|------------|----------|----------------------|--------------|--------------------------------|----------|-------------------|-------------------------------|-----------------------------|
| P35579    | Myosin 9                                 | 226390  | 5.34    | 4441.96    | 122      | 164                  | 61.17        | 7.25                           | 1069     | 7                 | 18.24                         | 0.040                       |
| Q7Z406    | Myosin 14                                | 227861  | 5.63    | 1485.78    | 63       | 173                  | 34.24        | 9.62                           | 348      | 4                 | 21.19                         | 0.045                       |
| P18206    | Vinculin                                 | 123721  | 5.35    | 2596.04    | 63       | 107                  | 64.29        | 7.92                           | 547      | 3                 | 16.21                         | 0.039                       |
| P35580    | Myosin 10                                | 228856  | 5.27    | 1454.41    | 61       | 164                  | 38.36        | 9.16                           | 309      | 5                 | 22.09                         | 0.044                       |
| P35749    | Myosin 11                                | 227197  | 5.25    | 1644.38    | 55       | 161                  | 36.87        | 10.61                          | 333      | 3                 | 21.96                         | 0.045                       |
| P07996    | Thrombospondin 1                         | 129299  | 4.53    | 2210.22    | 51       | 101                  | 56.84        | 7.76                           | 449      | 2                 | 17.38                         | 0.039                       |
| P12814    | Alpha actinin 1                          | 102992  | 5.09    | 1769.67    | 43       | 77                   | 66.14        | 8.11                           | 381      | 7                 | 18.21                         | 0.041                       |
| Q13201    | Multimerin 1                             | 138023  | 7.82    | 745.34     | 34       | 102                  | 46.99        | 9.28                           | 243      | 8                 | 21.50                         | 0.044                       |
| P02768    | Serum albumin                            | 69321   | 5.86    | 946.76     | 33       | 55                   | 60.43        | 9.20                           | 252      | 3                 | 18.05                         | 0.041                       |
| P02671    | Fibrinogen alpha chain                   | 94914   | 5.61    | 1027.61    | 33       | 59                   | 43.88        | 8.72                           | 251      | 4                 | 18.46                         | 0.040                       |
| P00488    | Coagulation factor XIII A chain          | 83214   | 5.67    | 1046.03    | 31       | 58                   | 65.16        | 7.42                           | 217      | 2                 | 20.89                         | 0.044                       |
| P60709    | Actin cytoplasmic 1                      | 41709   | 5.14    | 2938.20    | 29       | 34                   | 73.87        | 7.37                           | 557      | 4                 | 13.50                         | 0.035                       |
| P06396    | Gelsolin                                 | 85644   | 5.84    | 889.76     | 29       | 51                   | 63.30        | 7.85                           | 227      | 2                 | 19.21                         | 0.043                       |
| P02675    | Fibrinogen beta chain                    | 55892   | 8.25    | 847.12     | 29       | 42                   | 68.84        | 9.65                           | 264      | 5                 | 18.96                         | 0.042                       |
| P02679    | Fibrinogen gamma chain                   | 51478   | 5.24    | 1134.30    | 28       | 37                   | 67.11        | 9.15                           | 237      | 1                 | 17.69                         | 0.039                       |
| Q86UX7    | Fermitin family homolog 3                | 75905   | 6.54    | 917.73     | 26       | 45                   | 54.87        | 7.92                           | 188      | 1                 | 20.28                         | 0.040                       |
| P14618    | Pyruvate kinase isozymes M1 M2           | 57900   | 7.75    | 606.33     | 26       | 43                   | 63.09        | 9.71                           | 168      | 4                 | 21.86                         | 0.045                       |
| P13645    | Keratin type I cytoskeletal 10           | 59474   | 4.96    | 365.25     | 25       | 35                   | 49.58        | 8.71                           | 115      | 1                 | 25.70                         | 0.049                       |
| P63261    | Actin cytoplasmic 2                      | 41765   | 5.16    | 2956.11    | 23       | 34                   | 74.93        | 7.55                           | 504      | 3                 | 13.33                         | 0.037                       |
| P30101    | Protein disulfide isomerase A3           | 56746   | 5.93    | 394.35     | 23       | 49                   | 50.10        | 10.29                          | 113      | 3                 | 21.88                         | 0.044                       |
| P11142    | Heat shock cognate 71 kDa protein        | 70854   | 5.20    | 653.76     | 23       | 50                   | 57.59        | 9.04                           | 166      | 4                 | 21.01                         | 0.042                       |
| P08514    | Integrin alpha IIb                       | 113319  | 5.04    | 811.04     | 23       | 53                   | 38.79        | 6.91                           | 158      | 3                 | 20.37                         | 0.041                       |
| Q9H4B7    | Tubulin beta 1 chain                     | 50294   | 4.88    | 1128.59    | 21       | 32                   | 80.04        | 6.16                           | 197      | 1                 | 18.84                         | 0.041                       |
| P37802    | Transgelin 2                             | 22377   | 8.45    | 1146.07    | 21       | 25                   | 94.97        | 5.96                           | 218      | 2                 | 17.39                         | 0.041                       |
| P11021    | 78 kDa glucose regulated protein         | 72288   | 4.87    | 372.56     | 21       | 52                   | 40.98        | 7.86                           | 126      | 4                 | 23.69                         | 0.045                       |
| P06733    | Alpha enolase                            | 47139   | 7.17    | 644.26     | 21       | 31                   | 59.91        | 9.16                           | 147      | 1                 | 21.17                         | 0.042                       |
| P04406    | Glyceraldehyde 3 phosphate dehydrogenase | 36030   | 8.70    | 1212.49    | 21       | 21                   | 70.45        | 7.93                           | 233      | 1                 | 15.70                         | 0.037                       |
| Q01518    | Adenylyl cyclase associated protein 1    | 51822   | 8.13    | 585.34     | 20       | 44                   | 60.21        | 8.34                           | 141      | 2                 | 19.46                         | 0.042                       |
| P68133    | Actin alpha skeletal muscle              | 42023   | 5.07    | 1468.28    | 20       | 34                   | 52.52        | 7.39                           | 284      | 2                 | 15.45                         | 0.034                       |
| P54652    | Heat shock related 70 kDa protein 2      | 69977   | 5.41    | 465.44     | 20       | 50                   | 40.53        | 9.32                           | 106      | 1                 | 20.84                         | 0.046                       |
| P08567    | Pleckstrin                               | 40071   | 8.34    | 1004.69    | 18       | 27                   | 54.00        | 9.22                           | 196      | 2                 | 18.49                         | 0.039                       |
| Q9UBW5    | Bridging integrator 2                    | 61836   | 4.93    | 392.86     | 17       | 42                   | 50.97        | 9.94                           | 94       | 5                 | 27.03                         | 0.048                       |
| P07237    | Protein disulfide isomerase              | 57080   | 4.56    | 389.36     | 17       | 50                   | 47.44        | 9.60                           | 88       | 2                 | 26.62                         | 0.044                       |
| P05106    | Integrin beta 3                          | 87000   | 4.91    | 581.05     | 17       | 66                   | 40.36        | 7.95                           | 136      | 5                 | 19.70                         | 0.039                       |
| Q96TA2    | ATP dependent metalloprotease YME1L1     | 86401   | 9.07    | 445.34     | 16       | 62                   | 33.38        | 9.91                           | 105      | 2                 | 24.43                         | 0.045                       |
| Q13418    | Integrin linked protein kinase           | 51385   | 8.02    | 390.54     | 16       | 40                   | 63.50        | 8.05                           | 111      | 3                 | 20.66                         | 0.041                       |
| P68366    | Tubulin alpha 4A chain                   | 49892   | 4.75    | 952.03     | 16       | 35                   | 51.34        | 6.93                           | 168      | 0                 | 19.46                         | 0.041                       |

|        |                                              |        |      |         |    |     |       |       |     |   |       |       |
|--------|----------------------------------------------|--------|------|---------|----|-----|-------|-------|-----|---|-------|-------|
| P63104 | 14 3 3 protein zeta delta                    | 27727  | 4.53 | 700.22  | 16 | 25  | 50.20 | 8.64  | 123 | 0 | 15.38 | 0.040 |
| P06753 | Tropomyosin alpha 3 chain                    | 32798  | 4.49 | 394.63  | 16 | 27  | 48.24 | 9.67  | 77  | 0 | 19.40 | 0.037 |
| O95810 | Serum deprivation response protein           | 47144  | 4.96 | 417.31  | 16 | 28  | 46.59 | 10.23 | 99  | 1 | 23.03 | 0.039 |
| P00924 | Enolase 1                                    | 46773  | 6.15 | 258.85  | 15 | 28  | 46.00 | 11.04 | 98  | 3 | 20.78 | 0.042 |
| P68032 | Actin alpha cardiac muscle 1                 | 41991  | 5.07 | 1512.79 | 14 | 34  | 53.58 | 7.02  | 252 | 4 | 14.10 | 0.033 |
| P63267 | Actin gamma enteric smooth muscle            | 41849  | 5.16 | 1346.91 | 14 | 33  | 43.62 | 8.75  | 225 | 1 | 14.31 | 0.031 |
| P50552 | Vasodilator stimulated phosphoprotein        | 39805  | 9.33 | 494.22  | 14 | 30  | 45.79 | 8.03  | 86  | 1 | 19.54 | 0.041 |
| P34931 | Heat shock 70 kDa protein 1L                 | 70331  | 5.65 | 440.93  | 14 | 48  | 30.42 | 8.77  | 72  | 0 | 22.78 | 0.044 |
| Q9BVA1 | Tubulin beta 2B chain                        | 49920  | 4.59 | 592.94  | 13 | 31  | 40.00 | 9.37  | 90  | 1 | 19.21 | 0.042 |
| Q562R1 | Beta actin like protein 2                    | 41975  | 5.25 | 611.72  | 13 | 35  | 57.45 | 8.88  | 124 | 2 | 17.14 | 0.036 |
| P62736 | Actin aortic smooth muscle                   | 41981  | 5.08 | 1428.19 | 13 | 34  | 44.83 | 6.88  | 231 | 1 | 13.92 | 0.031 |
| P08107 | Heat shock 70 kDa protein 1                  | 70009  | 5.32 | 454.47  | 13 | 49  | 32.14 | 8.32  | 99  | 4 | 22.39 | 0.045 |
| P04075 | Fructose bisphosphate aldolase A             | 39395  | 8.06 | 568.58  | 13 | 32  | 44.23 | 7.51  | 116 | 2 | 20.46 | 0.040 |
| P00558 | Phosphoglycerate kinase 1                    | 44586  | 8.15 | 275.54  | 13 | 33  | 50.60 | 9.46  | 76  | 1 | 23.05 | 0.042 |
| P00338 | L lactate dehydrogenase A chain              | 36665  | 8.37 | 300.66  | 13 | 33  | 55.12 | 10.65 | 79  | 2 | 20.33 | 0.047 |
| Q6S8J3 | ANKRD26 like family C member 1A              | 121285 | 5.77 | 1237.12 | 12 | 101 | 17.58 | 7.99  | 126 | 3 | 17.13 | 0.040 |
| P67936 | Tropomyosin alpha 4 chain                    | 28504  | 4.47 | 439.60  | 12 | 29  | 42.74 | 8.73  | 86  | 0 | 20.34 | 0.035 |
| Q15942 | Zyxin                                        | 61238  | 6.21 | 440.84  | 11 | 29  | 39.69 | 5.12  | 96  | 2 | 20.44 | 0.041 |
| P68871 | Hemoglobin subunit beta                      | 15988  | 6.88 | 989.11  | 11 | 13  | 76.87 | 7.83  | 151 | 0 | 13.40 | 0.029 |
| P68371 | Tubulin beta 2C chain                        | 49799  | 4.60 | 691.78  | 11 | 31  | 37.75 | 6.19  | 91  | 1 | 16.72 | 0.039 |
| P62937 | Peptidyl prolyl cis trans isomerase A        | 18000  | 7.85 | 203.36  | 11 | 12  | 70.30 | 4.92  | 64  | 1 | 20.04 | 0.044 |
| Q9BQE3 | Tubulin alpha 1C chain                       | 49863  | 4.79 | 750.80  | 10 | 35  | 45.43 | 8.52  | 114 | 2 | 18.37 | 0.039 |
| Q99867 | Putative tubulin beta 4q chain               | 48403  | 4.95 | 411.36  | 10 | 32  | 39.63 | 10.25 | 57  | 0 | 19.97 | 0.040 |
| P68363 | Tubulin alpha 1B chain                       | 50119  | 4.76 | 939.70  | 10 | 35  | 31.93 | 5.69  | 121 | 0 | 15.52 | 0.037 |
| P31146 | Coronin 1A                                   | 50993  | 6.24 | 284.90  | 10 | 36  | 40.13 | 8.23  | 79  | 3 | 18.53 | 0.043 |
| P23528 | Cofilin 1                                    | 18490  | 8.22 | 582.07  | 10 | 19  | 59.64 | 5.72  | 82  | 0 | 15.83 | 0.035 |
| P17066 | Heat shock 70 kDa protein 6                  | 70984  | 5.73 | 423.44  | 10 | 57  | 28.30 | 9.77  | 53  | 0 | 23.98 | 0.040 |
| P07437 | Tubulin beta chain                           | 49638  | 4.59 | 693.14  | 10 | 31  | 31.53 | 6.19  | 86  | 0 | 16.03 | 0.039 |
| P04350 | Tubulin beta 4 chain                         | 49553  | 4.59 | 635.59  | 10 | 31  | 35.14 | 8.62  | 101 | 2 | 20.83 | 0.041 |
| Q9BYX7 | Kappa actin                                  | 41988  | 5.88 | 508.52  | 9  | 30  | 36.00 | 10.10 | 80  | 2 | 19.22 | 0.044 |
| Q13885 | Tubulin beta 2A chain                        | 49874  | 4.59 | 615.97  | 9  | 31  | 30.11 | 6.07  | 75  | 1 | 16.73 | 0.039 |
| P60660 | Myosin light polypeptide 6                   | 16919  | 4.36 | 411.42  | 9  | 15  | 78.15 | 7.86  | 76  | 0 | 17.23 | 0.034 |
| Q71U36 | Tubulin alpha 1A chain                       | 50103  | 4.76 | 696.55  | 8  | 35  | 28.82 | 6.16  | 99  | 1 | 14.77 | 0.038 |
| Q3ZCM7 | Tubulin beta 8 chain                         | 49743  | 4.60 | 426.48  | 8  | 31  | 20.72 | 10.86 | 66  | 1 | 17.13 | 0.040 |
| P48741 | Putative heat shock 70 kDa protein 7         | 40219  | 7.86 | 257.00  | 8  | 29  | 31.88 | 9.19  | 48  | 1 | 26.71 | 0.044 |
| P27105 | Erythrocyte band 7 integral membrane protein | 31710  | 7.99 | 253.66  | 8  | 23  | 39.24 | 5.70  | 44  | 0 | 19.23 | 0.042 |
| P09972 | Fructose bisphosphate aldolase C             | 39431  | 6.43 | 381.03  | 8  | 34  | 37.64 | 10.27 | 74  | 2 | 23.86 | 0.040 |
| P07951 | Tropomyosin beta chain                       | 32830  | 4.46 | 305.24  | 8  | 28  | 27.82 | 9.89  | 56  | 0 | 23.18 | 0.034 |
| P07195 | L lactate dehydrogenase B chain              | 36615  | 5.64 | 322.98  | 8  | 25  | 35.33 | 8.26  | 47  | 0 | 19.08 | 0.047 |
| Q9NY65 | Tubulin alpha 8 chain                        | 50061  | 4.76 | 445.65  | 7  | 35  | 41.43 | 7.68  | 105 | 3 | 17.43 | 0.038 |
| Q13748 | Tubulin alpha 3C D chain                     | 49927  | 4.80 | 443.95  | 7  | 35  | 27.78 | 6.78  | 72  | 0 | 16.12 | 0.038 |
| P69905 | Hemoglobin subunit alpha                     | 15247  | 9.18 | 535.71  | 7  | 9   | 84.51 | 9.90  | 90  | 0 | 15.81 | 0.033 |
| P19105 | Myosin regulatory light chain MRLC3          | 19781  | 4.45 | 353.98  | 7  | 19  | 46.20 | 6.03  | 63  | 2 | 18.92 | 0.042 |
| P07737 | Profilin 1                                   | 15044  | 8.46 | 527.53  | 7  | 17  | 75.00 | 9.86  | 100 | 1 | 12.99 | 0.028 |
| P02042 | Hemoglobin subunit delta                     | 16045  | 8.24 | 323.05  | 7  | 13  | 46.94 | 7.05  | 66  | 0 | 14.43 | 0.030 |
| Q9Y281 | Cofilin 2                                    | 18724  | 8.16 | 302.60  | 6  | 18  | 42.17 | 8.35  | 39  | 0 | 20.52 | 0.041 |
| Q15404 | Ras suppressor protein 1                     | 31520  | 9.14 | 275.78  | 6  | 23  | 49.46 | 4.33  | 60  | 0 | 19.71 | 0.036 |
| Q13509 | Tubulin beta 3 chain                         | 50400  | 4.64 | 505.58  | 6  | 31  | 25.56 | 5.19  | 52  | 1 | 19.63 | 0.039 |

|        |                                                      |       |      |        |   |    |       |       |    |   |       |       |
|--------|------------------------------------------------------|-------|------|--------|---|----|-------|-------|----|---|-------|-------|
| P24844 | Myosin regulatory light polypeptide 9                | 19814 | 4.59 | 242.72 | 6 | 19 | 56.40 | 9.44  | 59 | 3 | 21.68 | 0.036 |
| P14649 | Myosin light chain 6B                                | 22749 | 5.42 | 217.50 | 6 | 18 | 44.23 | 10.52 | 51 | 1 | 20.98 | 0.036 |
| P09493 | Tropomyosin alpha 1 chain                            | 32688 | 4.49 | 326.64 | 6 | 28 | 21.13 | 9.99  | 60 | 1 | 19.18 | 0.035 |
| P02775 | Platelet basic protein                               | 13885 | 9.07 | 278.91 | 6 | 9  | 38.28 | 9.11  | 70 | 0 | 18.22 | 0.035 |
| Q9BUF5 | Tubulin beta 6 chain                                 | 49825 | 4.58 | 362.11 | 5 | 31 | 23.54 | 10.01 | 43 | 2 | 15.88 | 0.034 |
| Q6PEY2 | Tubulin alpha 3E chain                               | 49884 | 4.79 | 360.11 | 5 | 34 | 26.89 | 6.22  | 74 | 2 | 16.32 | 0.037 |
| P69891 | Hemoglobin subunit gamma 1                           | 16130 | 6.78 | 190.29 | 5 | 13 | 46.26 | 6.41  | 42 | 0 | 16.01 | 0.040 |
| P30041 | Peroxiredoxin 6                                      | 25019 | 5.96 | 168.18 | 5 | 28 | 31.70 | 10.25 | 21 | 0 | 16.77 | 0.050 |
| Q9H299 | SH3 domain binding glutamic acid rich like protein 3 | 10431 | 4.62 | 474.30 | 4 | 7  | 66.67 | 7.55  | 61 | 0 | 16.02 | 0.035 |
| P02776 | Platelet factor 4                                    | 10837 | 8.78 | 225.70 | 4 | 7  | 35.64 | 7.47  | 41 | 1 | 16.69 | 0.035 |
| P10720 | Platelet factor 4 variant                            | 11545 | 9.49 | 197.94 | 3 | 8  | 27.88 | 10.22 | 26 | 0 | 14.63 | 0.030 |
| P69892 | Hemoglobin subunit gamma 2                           | 16116 | 6.78 | 183.94 | 2 | 13 | 28.57 | 9.04  | 29 | 1 | 17.15 | 0.034 |
|        |                                                      |       |      |        |   |    |       |       |    |   |       |       |

**Cystic fibrosis PLT LC-MS run 2: PLT\_CF\_290709\_02**

| Accession | Description                                   | mW (Da) | pI (pH) | PLGS Score | Peptides | Theoretical Peptides | Coverage (%) | Precursor RMS Mass Error (ppm) | Products | Modified Peptides | Products RMS Mass Error (ppm) | Products RMS RT Error (min) |
|-----------|-----------------------------------------------|---------|---------|------------|----------|----------------------|--------------|--------------------------------|----------|-------------------|-------------------------------|-----------------------------|
| P35579    | Myosin 9                                      | 226390  | 5.34    | 5084.87    | 131      | 164                  | 61.68        | 7.63                           | 1168     | 14                | 17.89                         | 0.036                       |
| P35580    | Myosin 10                                     | 228856  | 5.27    | 1773.12    | 77       | 164                  | 45.29        | 8.69                           | 436      | 10                | 22.51                         | 0.041                       |
| Q7Z406    | Myosin 14                                     | 227861  | 5.63    | 1602.31    | 70       | 173                  | 43.41        | 9.97                           | 430      | 8                 | 22.66                         | 0.044                       |
| P18206    | Vinculin                                      | 123721  | 5.35    | 2829.98    | 66       | 107                  | 63.14        | 8.03                           | 617      | 11                | 18.50                         | 0.037                       |
| P35749    | Myosin 11                                     | 227197  | 5.25    | 1892.68    | 61       | 161                  | 42.19        | 9.51                           | 452      | 11                | 23.49                         | 0.041                       |
| P07996    | Thrombospondin 1                              | 129299  | 4.53    | 2050.71    | 51       | 101                  | 54.79        | 8.40                           | 459      | 4                 | 17.86                         | 0.040                       |
| P12814    | Alpha actinin 1                               | 102992  | 5.09    | 1855.23    | 44       | 77                   | 64.01        | 8.32                           | 415      | 5                 | 18.78                         | 0.039                       |
| Q9P278    | Folliculin interacting protein 2              | 122037  | 6.17    | 614.05     | 36       | 81                   | 38.96        | 8.57                           | 176      | 5                 | 23.99                         | 0.045                       |
| Q13201    | Multimerin 1                                  | 138023  | 7.82    | 824.76     | 36       | 102                  | 47.72        | 10.42                          | 256      | 11                | 21.97                         | 0.041                       |
| P06396    | Gelsolin                                      | 85644   | 5.84    | 1016.78    | 35       | 51                   | 62.40        | 7.67                           | 269      | 3                 | 21.14                         | 0.040                       |
| P14618    | Pyruvate kinase isozymes M1 M2                | 57900   | 7.75    | 761.35     | 34       | 43                   | 72.69        | 7.45                           | 217      | 3                 | 20.82                         | 0.040                       |
| P00488    | Coagulation factor XIII A chain               | 83214   | 5.67    | 859.42     | 32       | 58                   | 55.19        | 7.98                           | 215      | 3                 | 22.83                         | 0.040                       |
| Q6S8J3    | ANKRD26 like family C member 1A               | 121285  | 5.77    | 1261.07    | 32       | 101                  | 45.86        | 8.65                           | 204      | 6                 | 19.83                         | 0.042                       |
| P02675    | Fibrinogen beta chain                         | 55892   | 8.25    | 903.01     | 31       | 42                   | 72.30        | 8.68                           | 277      | 4                 | 18.45                         | 0.038                       |
| P08514    | Integrin alpha IIb                            | 113319  | 5.04    | 836.70     | 31       | 53                   | 36.86        | 9.27                           | 208      | 5                 | 21.50                         | 0.040                       |
| P02671    | Fibrinogen alpha chain                        | 94914   | 5.61    | 1065.97    | 31       | 59                   | 42.15        | 9.02                           | 263      | 9                 | 18.82                         | 0.041                       |
| Q08043    | Alpha actinin 3                               | 103176  | 5.22    | 708.56     | 29       | 79                   | 39.18        | 11.16                          | 158      | 1                 | 24.79                         | 0.042                       |
| P60709    | Actin cytoplasmic 1                           | 41709   | 5.14    | 2694.42    | 29       | 34                   | 81.87        | 6.65                           | 507      | 4                 | 13.79                         | 0.039                       |
| Q4UJ75    | Ankyrin repeat domain containing protein 20A4 | 94090   | 7.86    | 634.56     | 28       | 87                   | 42.16        | 9.25                           | 154      | 5                 | 23.93                         | 0.042                       |
| P02768    | Serum albumin                                 | 69321   | 5.86    | 831.99     | 28       | 55                   | 50.90        | 9.38                           | 194      | 2                 | 17.90                         | 0.037                       |
| P26038    | Moesin                                        | 67777   | 6.01    | 621.29     | 27       | 63                   | 54.42        | 8.53                           | 144      | 4                 | 23.46                         | 0.039                       |
| P35609    | Alpha actinin 2                               | 103788  | 5.15    | 836.15     | 27       | 80                   | 40.94        | 9.63                           | 178      | 6                 | 23.75                         | 0.044                       |
| P11142    | Heat shock cognate 71 kDa protein             | 70854   | 5.20    | 672.28     | 26       | 50                   | 55.57        | 7.77                           | 162      | 3                 | 20.31                         | 0.039                       |
| O75083    | WD repeat containing protein 1                | 66151   | 6.18    | 505.05     | 26       | 43                   | 64.19        | 7.87                           | 148      | 2                 | 19.08                         | 0.044                       |
| P63261    | Actin cytoplasmic 2                           | 41765   | 5.16    | 2694.48    | 26       | 34                   | 84.80        | 6.51                           | 519      | 3                 | 13.39                         | 0.039                       |
| P11021    | 78 kDa glucose regulated protein              | 72288   | 4.87    | 431.43     | 25       | 52                   | 38.69        | 8.20                           | 137      | 3                 | 21.07                         | 0.044                       |
| Q86UX7    | Fermitin family homolog 3                     | 75905   | 6.54    | 888.44     | 25       | 45                   | 60.42        | 9.12                           | 182      | 0                 | 20.86                         | 0.035                       |
| O43707    | Alpha actinin 4                               | 104788  | 5.12    | 1239.21    | 24       | 87                   | 36.66        | 9.19                           | 193      | 4                 | 22.18                         | 0.040                       |
| P05106    | Integrin beta 3                               | 87000   | 4.91    | 714.46     | 23       | 66                   | 39.85        | 9.91                           | 150      | 2                 | 21.47                         | 0.041                       |
| P06733    | Alpha enolase                                 | 47139   | 7.17    | 634.48     | 22       | 31                   | 61.29        | 8.28                           | 155      | 2                 | 20.09                         | 0.040                       |
| P02679    | Fibrinogen gamma chain                        | 51478   | 5.24    | 1249.88    | 22       | 37                   | 64.24        | 7.65                           | 224      | 2                 | 17.65                         | 0.037                       |

|        |                                                                     |        |      |         |    |    |       |       |     |   |       |       |
|--------|---------------------------------------------------------------------|--------|------|---------|----|----|-------|-------|-----|---|-------|-------|
| Q562R1 | Beta actin like protein 2                                           | 41975  | 5.25 | 684.52  | 21 | 35 | 74.20 | 9.74  | 180 | 3 | 20.43 | 0.039 |
| Q9H4B7 | Tubulin beta 1 chain                                                | 50294  | 4.88 | 1131.27 | 21 | 32 | 74.94 | 5.74  | 214 | 1 | 16.80 | 0.036 |
| Q01518 | Adenylyl cyclase associated protein 1                               | 51822  | 8.13 | 637.92  | 20 | 44 | 61.26 | 7.74  | 133 | 1 | 19.77 | 0.039 |
| P00924 | Enolase 1                                                           | 46773  | 6.15 | 439.28  | 20 | 28 | 49.89 | 9.10  | 127 | 2 | 19.01 | 0.034 |
| O95810 | Serum deprivation response protein                                  | 47144  | 4.96 | 397.79  | 20 | 28 | 61.18 | 9.20  | 120 | 1 | 22.09 | 0.037 |
| P63104 | 14 3 3 protein zeta delta                                           | 27727  | 4.53 | 717.27  | 20 | 25 | 64.90 | 7.45  | 147 | 1 | 15.62 | 0.039 |
| Q9Y2G4 | Ankyrin repeat domain containing protein 6                          | 79908  | 9.69 | 517.16  | 19 | 51 | 34.11 | 8.48  | 120 | 2 | 23.69 | 0.043 |
| P34931 | Heat shock 70 kDa protein 1L                                        | 70331  | 5.65 | 472.64  | 19 | 48 | 52.26 | 7.00  | 127 | 5 | 23.09 | 0.040 |
| P68133 | Actin alpha skeletal muscle                                         | 42023  | 5.07 | 1374.96 | 19 | 34 | 53.85 | 10.71 | 283 | 2 | 15.83 | 0.037 |
| P04075 | Fructose bisphosphate aldolase A                                    | 39395  | 8.06 | 609.76  | 18 | 32 | 60.71 | 8.20  | 164 | 4 | 19.07 | 0.042 |
| P54652 | Heat shock related 70 kDa protein 2                                 | 69977  | 5.41 | 471.47  | 18 | 50 | 42.10 | 9.83  | 141 | 6 | 21.62 | 0.042 |
| Q99867 | Putative tubulin beta 4q chain                                      | 48403  | 4.95 | 436.43  | 18 | 32 | 58.76 | 11.12 | 108 | 2 | 25.23 | 0.041 |
| P35527 | Keratin type I cytoskeletal 9                                       | 62091  | 5.01 | 346.28  | 18 | 40 | 44.78 | 9.50  | 94  | 0 | 24.11 | 0.045 |
| P13645 | Keratin type I cytoskeletal 10                                      | 59474  | 4.96 | 323.25  | 18 | 35 | 40.47 | 8.59  | 93  | 0 | 20.18 | 0.043 |
| P00558 | Phosphoglycerate kinase 1                                           | 44586  | 8.15 | 298.01  | 18 | 33 | 58.99 | 11.55 | 115 | 3 | 25.04 | 0.042 |
| P04406 | Glyceraldehyde 3 phosphate dehydrogenase                            | 36030  | 8.70 | 991.13  | 18 | 21 | 68.96 | 7.27  | 221 | 1 | 16.26 | 0.033 |
| Q8NFP4 | MAM domain containing glycosylphosphatidylinositol anchor protein 1 | 105723 | 8.27 | 605.58  | 17 | 64 | 30.37 | 10.99 | 98  | 2 | 23.41 | 0.045 |
| P37802 | Transgelin 2                                                        | 22377  | 8.45 | 983.89  | 16 | 25 | 85.93 | 6.05  | 204 | 4 | 17.56 | 0.039 |
| P07437 | Tubulin beta chain                                                  | 49638  | 4.59 | 794.85  | 16 | 31 | 55.41 | 5.59  | 127 | 2 | 17.45 | 0.040 |
| Q9H892 | Tetratricopeptide repeat protein 12                                 | 78687  | 5.36 | 368.28  | 16 | 57 | 25.11 | 10.12 | 79  | 1 | 27.05 | 0.042 |
| Q13418 | Integrin linked protein kinase                                      | 51385  | 8.02 | 280.55  | 16 | 40 | 58.63 | 8.88  | 86  | 3 | 20.67 | 0.042 |
| P08567 | Pleckstrin                                                          | 40071  | 8.34 | 1106.78 | 16 | 27 | 55.43 | 8.28  | 205 | 2 | 18.34 | 0.034 |
| O00151 | PDZ and LIM domain protein 1                                        | 36049  | 6.60 | 357.85  | 15 | 21 | 69.60 | 7.51  | 89  | 3 | 21.17 | 0.041 |
| P68366 | Tubulin alpha 4A chain                                              | 49892  | 4.75 | 858.89  | 15 | 35 | 60.04 | 7.28  | 169 | 2 | 17.55 | 0.034 |
| P08107 | Heat shock 70 kDa protein 1                                         | 70009  | 5.32 | 542.87  | 14 | 49 | 34.17 | 9.63  | 79  | 2 | 24.07 | 0.042 |
| P23528 | Cofilin 1                                                           | 18490  | 8.22 | 485.38  | 14 | 19 | 72.29 | 7.39  | 97  | 0 | 15.10 | 0.036 |
| Q9BVA1 | Tubulin beta 2B chain                                               | 49920  | 4.59 | 725.68  | 14 | 31 | 48.09 | 8.41  | 109 | 1 | 17.82 | 0.039 |
| P07737 | Profilin 1                                                          | 15044  | 8.46 | 813.11  | 13 | 17 | 90.71 | 7.31  | 176 | 2 | 15.65 | 0.030 |
| Q9BQE3 | Tubulin alpha 1C chain                                              | 49863  | 4.79 | 633.93  | 13 | 35 | 46.77 | 7.52  | 125 | 2 | 19.30 | 0.035 |
| Q15942 | Zyxin                                                               | 61238  | 6.21 | 521.15  | 13 | 29 | 38.29 | 7.83  | 103 | 1 | 21.19 | 0.038 |
| P17066 | Heat shock 70 kDa protein 6                                         | 70984  | 5.73 | 467.17  | 13 | 57 | 28.30 | 8.59  | 66  | 2 | 23.39 | 0.039 |
| P02042 | Hemoglobin subunit delta                                            | 16045  | 8.24 | 404.64  | 13 | 13 | 86.39 | 8.74  | 94  | 0 | 18.10 | 0.033 |
| P09493 | Tropomyosin alpha 1 chain                                           | 32688  | 4.49 | 302.61  | 13 | 28 | 36.27 | 7.75  | 57  | 0 | 21.32 | 0.039 |
| Q15404 | Ras suppressor protein 1                                            | 31520  | 9.14 | 283.63  | 13 | 23 | 71.84 | 8.92  | 86  | 1 | 21.65 | 0.036 |
| P68363 | Tubulin alpha 1B chain                                              | 50119  | 4.76 | 838.53  | 13 | 35 | 47.01 | 6.75  | 137 | 0 | 17.75 | 0.033 |
| P68371 | Tubulin beta 2C chain                                               | 49799  | 4.60 | 741.54  | 12 | 31 | 57.75 | 6.41  | 108 | 2 | 15.33 | 0.035 |
| P04350 | Tubulin beta 4 chain                                                | 49553  | 4.59 | 644.07  | 12 | 31 | 47.30 | 7.03  | 105 | 1 | 17.59 | 0.036 |
| P67936 | Tropomyosin alpha 4 chain                                           | 28504  | 4.47 | 384.18  | 12 | 29 | 42.34 | 7.20  | 85  | 0 | 17.86 | 0.038 |
| P00338 | L lactate dehydrogenase A chain                                     | 36665  | 8.37 | 349.99  | 12 | 33 | 48.49 | 8.45  | 90  | 2 | 19.27 | 0.041 |
| P07951 | Tropomyosin beta chain                                              | 32830  | 4.46 | 322.70  | 12 | 28 | 42.25 | 4.85  | 70  | 0 | 18.24 | 0.035 |
| O15145 | Actin related protein 2 3 complex subunit 3                         | 20533  | 8.80 | 108.09  | 12 | 17 | 72.47 | 8.32  | 74  | 2 | 24.99 | 0.040 |
| P68871 | Hemoglobin subunit beta                                             | 15988  | 6.88 | 1050.92 | 12 | 13 | 93.88 | 8.64  | 184 | 0 | 13.68 | 0.030 |
| Q71U36 | Tubulin alpha 1A chain                                              | 50103  | 4.76 | 661.68  | 11 | 35 | 41.02 | 7.63  | 121 | 1 | 17.32 | 0.033 |
| P60660 | Myosin light polypeptide 6                                          | 16919  | 4.36 | 591.87  | 11 | 15 | 61.59 | 5.86  | 113 | 0 | 17.52 | 0.042 |
| Q13509 | Tubulin beta 3 chain                                                | 50400  | 4.64 | 543.37  | 11 | 31 | 39.78 | 8.07  | 89  | 2 | 20.83 | 0.039 |
| Q6PEY2 | Tubulin alpha 3E chain                                              | 49884  | 4.79 | 363.82  | 11 | 34 | 45.78 | 7.78  | 96  | 1 | 22.36 | 0.035 |
| Q9UG22 | GTPase IMAP family member 2                                         | 37992  | 8.16 | 325.24  | 11 | 32 | 34.42 | 10.08 | 55  | 1 | 25.78 | 0.045 |

|        |                                          |        |      |         |    |     |       |       |     |   |       |       |
|--------|------------------------------------------|--------|------|---------|----|-----|-------|-------|-----|---|-------|-------|
| Q04917 | 14 3 3 protein eta                       | 28201  | 4.56 | 284.42  | 11 | 28  | 47.56 | 10.67 | 71  | 1 | 19.62 | 0.040 |
| P68032 | Actin alpha cardiac muscle 1             | 41991  | 5.07 | 1423.64 | 11 | 34  | 42.44 | 6.68  | 226 | 2 | 13.60 | 0.034 |
| A5A3E0 | ANKRD26 like family C member 1B          | 121366 | 5.77 | 1201.62 | 10 | 101 | 16.65 | 10.01 | 128 | 8 | 18.46 | 0.038 |
| Q13885 | Tubulin beta 2A chain                    | 49874  | 4.59 | 733.35  | 10 | 31  | 35.28 | 4.57  | 85  | 0 | 15.64 | 0.038 |
| P69905 | Hemoglobin subunit alpha                 | 15247  | 9.18 | 328.12  | 10 | 9   | 92.96 | 10.37 | 86  | 0 | 17.25 | 0.035 |
| P06753 | Tropomyosin alpha 3 chain                | 32798  | 4.49 | 292.91  | 10 | 27  | 39.44 | 7.90  | 60  | 1 | 18.47 | 0.045 |
| P24844 | Myosin regulatory light polypeptide 9    | 19814  | 4.59 | 277.65  | 10 | 19  | 60.47 | 7.20  | 50  | 0 | 19.95 | 0.042 |
| P28065 | Proteasome subunit beta type 9           | 23249  | 4.71 | 263.83  | 10 | 16  | 63.01 | 12.26 | 67  | 4 | 21.44 | 0.047 |
| P31946 | 14 3 3 protein beta alpha                | 28064  | 4.57 | 252.70  | 10 | 22  | 49.59 | 11.13 | 65  | 1 | 24.15 | 0.040 |
| P62736 | Actin aortic smooth muscle               | 41981  | 5.08 | 1386.34 | 10 | 34  | 43.50 | 6.18  | 226 | 4 | 13.90 | 0.035 |
| P02775 | Platelet basic protein                   | 13885  | 9.07 | 674.37  | 9  | 9   | 47.66 | 8.17  | 116 | 1 | 15.07 | 0.033 |
| Q9NY65 | Tubulin alpha 8 chain                    | 50061  | 4.76 | 391.52  | 9  | 35  | 44.10 | 7.37  | 98  | 1 | 18.19 | 0.038 |
| Q9BUF5 | Tubulin beta 6 chain                     | 49825  | 4.58 | 384.41  | 9  | 31  | 31.39 | 9.81  | 61  | 3 | 23.62 | 0.037 |
| P27348 | 14 3 3 protein theta                     | 27746  | 4.48 | 258.18  | 9  | 24  | 37.96 | 7.28  | 49  | 0 | 23.66 | 0.038 |
| O00299 | Chloride intracellular channel protein 1 | 26905  | 4.90 | 250.35  | 9  | 20  | 60.17 | 6.93  | 77  | 1 | 24.12 | 0.041 |
| P63267 | Actin gamma enteric smooth muscle        | 41849  | 5.16 | 1328.08 | 9  | 33  | 24.73 | 6.72  | 212 | 1 | 13.74 | 0.035 |
| P48741 | Putative heat shock 70 kDa protein 7     | 40219  | 7.86 | 314.95  | 8  | 29  | 38.42 | 10.05 | 65  | 2 | 27.48 | 0.040 |
| P14649 | Myosin light chain 6B                    | 22749  | 5.42 | 239.50  | 8  | 18  | 38.46 | 6.17  | 54  | 1 | 18.69 | 0.039 |
| Q13748 | Tubulin alpha 3C D chain                 | 49927  | 4.80 | 480.48  | 8  | 35  | 35.78 | 7.61  | 92  | 2 | 17.34 | 0.036 |
|        |                                          |        |      |         |    |     |       |       |     |   |       |       |

**Cystic fibrosis PLT LC-MS run 3: PLT\_CF\_290709\_03**

| Accession | Description                                          | mW (Da) | pI (pH) | PLGS Score | Peptides | Theoretical Peptides | Coverage (%) | Precursor RMS Mass Error (ppm) | Products | Modified Peptides | Products RMS Mass Error (ppm) | Products RMS RT Error (min) |
|-----------|------------------------------------------------------|---------|---------|------------|----------|----------------------|--------------|--------------------------------|----------|-------------------|-------------------------------|-----------------------------|
| P35579    | Myosin 9                                             | 226390  | 5.34    | 4137.32    | 134      | 164                  | 65.66        | 7.84                           | 1081     | 12                | 18.36                         | 0.033                       |
| P35580    | Myosin 10                                            | 228856  | 5.27    | 1623.74    | 86       | 164                  | 44.84        | 9.53                           | 531      | 11                | 23.04                         | 0.035                       |
| Q7Z406    | Myosin 14                                            | 227861  | 5.63    | 2001.38    | 65       | 173                  | 37.34        | 10.17                          | 419      | 7                 | 22.61                         | 0.035                       |
| P35749    | Myosin 11                                            | 227197  | 5.25    | 1759.58    | 64       | 161                  | 42.70        | 9.97                           | 402      | 10                | 21.64                         | 0.036                       |
| P18206    | Vinculin                                             | 123721  | 5.35    | 2640.73    | 63       | 107                  | 60.23        | 7.59                           | 565      | 3                 | 18.48                         | 0.030                       |
| P12814    | Alpha actinin 1                                      | 102992  | 5.09    | 1648.55    | 58       | 77                   | 67.60        | 10.10                          | 448      | 7                 | 20.33                         | 0.033                       |
| P07996    | Thrombospondin 1                                     | 129299  | 4.53    | 2020.04    | 45       | 101                  | 57.78        | 7.59                           | 429      | 3                 | 17.72                         | 0.032                       |
| Q6TFL3    | Uncharacterized protein C9orf93                      | 152714  | 6.35    | 1209.36    | 42       | 148                  | 41.93        | 10.31                          | 273      | 12                | 24.51                         | 0.035                       |
| O43707    | Alpha actinin 4                                      | 104788  | 5.12    | 1311.99    | 36       | 87                   | 50.05        | 9.31                           | 274      | 5                 | 23.16                         | 0.034                       |
| Q6S8J3    | ANKRD26 like family C member 1A                      | 121285  | 5.77    | 1799.23    | 36       | 101                  | 48.00        | 10.59                          | 330      | 8                 | 20.21                         | 0.032                       |
| Q96SB8    | Structural maintenance of chromosomes protein 6      | 126246  | 6.56    | 832.08     | 34       | 104                  | 39.23        | 11.04                          | 220      | 6                 | 24.47                         | 0.037                       |
| P00488    | Coagulation factor XIII A chain                      | 83214   | 5.67    | 1142.73    | 34       | 58                   | 57.38        | 5.34                           | 252      | 2                 | 17.50                         | 0.032                       |
| P02671    | Fibrinogen alpha chain                               | 94914   | 5.61    | 967.83     | 33       | 59                   | 39.26        | 7.77                           | 252      | 3                 | 20.62                         | 0.034                       |
| P02675    | Fibrinogen beta chain                                | 55892   | 8.25    | 750.62     | 32       | 42                   | 77.80        | 8.42                           | 259      | 6                 | 20.86                         | 0.032                       |
| P10236    | DNA helicase primase complex protein                 | 114351  | 6.42    | 786.90     | 31       | 75                   | 41.97        | 10.42                          | 216      | 8                 | 23.30                         | 0.035                       |
| P06396    | Gelsolin                                             | 85644   | 5.84    | 1130.70    | 31       | 51                   | 62.92        | 8.75                           | 285      | 3                 | 20.77                         | 0.033                       |
| Q9H501    | ESF1 homolog                                         | 98734   | 4.82    | 633.81     | 30       | 87                   | 37.84        | 8.66                           | 176      | 4                 | 22.49                         | 0.037                       |
| O75083    | WD repeat containing protein 1                       | 66151   | 6.18    | 415.63     | 30       | 43                   | 74.42        | 7.66                           | 158      | 1                 | 22.65                         | 0.032                       |
| P60709    | Actin cytoplasmic 1                                  | 41709   | 5.14    | 2817.59    | 30       | 34                   | 83.20        | 6.76                           | 512      | 2                 | 14.36                         | 0.030                       |
| Q99613    | Eukaryotic translation initiation factor 3 subunit C | 105277  | 5.35    | 436.56     | 29       | 65                   | 36.25        | 10.51                          | 137      | 1                 | 24.96                         | 0.035                       |
| P08514    | Integrin alpha IIb                                   | 113319  | 5.04    | 986.12     | 29       | 53                   | 36.86        | 7.61                           | 202      | 3                 | 22.56                         | 0.035                       |
| P14618    | Pyruvate kinase isozymes M1 M2                       | 57900   | 7.75    | 849.51     | 28       | 43                   | 66.67        | 8.69                           | 190      | 2                 | 18.62                         | 0.031                       |
| Q86UX7    | Fermitin family homolog 3                            | 75905   | 6.54    | 927.53     | 26       | 45                   | 57.42        | 8.53                           | 193      | 0                 | 18.45                         | 0.031                       |
| P05106    | Integrin beta 3                                      | 87000   | 4.91    | 800.39     | 26       | 66                   | 51.14        | 10.06                          | 190      | 4                 | 20.24                         | 0.031                       |

|        |                                                      |        |      |         |    |     |       |       |     |   |       |       |
|--------|------------------------------------------------------|--------|------|---------|----|-----|-------|-------|-----|---|-------|-------|
| P02679 | Fibrinogen gamma chain                               | 51478  | 5.24 | 1064.73 | 26 | 37  | 71.08 | 8.36  | 221 | 2 | 18.99 | 0.030 |
| P02533 | Keratin type I cytoskeletal 14                       | 51589  | 4.90 | 414.70  | 25 | 42  | 50.64 | 8.94  | 155 | 7 | 23.65 | 0.036 |
| P02768 | Serum albumin                                        | 69321  | 5.86 | 893.59  | 25 | 55  | 47.29 | 11.11 | 197 | 2 | 18.96 | 0.031 |
| P63261 | Actin cytoplasmic 2                                  | 41765  | 5.16 | 2831.73 | 24 | 34  | 77.87 | 7.13  | 466 | 3 | 13.85 | 0.029 |
| P30101 | Protein disulfide isomerase A3                       | 56746  | 5.93 | 615.28  | 23 | 49  | 58.61 | 9.89  | 148 | 4 | 24.45 | 0.033 |
| P11142 | Heat shock cognate 71 kDa protein                    | 70854  | 5.20 | 539.19  | 22 | 50  | 41.80 | 8.53  | 113 | 2 | 22.89 | 0.037 |
| Q9H4B7 | Tubulin beta 1 chain                                 | 50294  | 4.88 | 1175.30 | 20 | 32  | 70.07 | 5.33  | 226 | 3 | 17.49 | 0.030 |
| P17066 | Heat shock 70 kDa protein 6                          | 70984  | 5.73 | 661.88  | 20 | 57  | 46.66 | 8.93  | 127 | 1 | 20.55 | 0.035 |
| P54652 | Heat shock related 70 kDa protein 2                  | 69977  | 5.41 | 409.99  | 20 | 50  | 45.54 | 10.16 | 106 | 2 | 19.91 | 0.035 |
| P06753 | Tropomyosin alpha 3 chain                            | 32798  | 4.49 | 354.43  | 20 | 27  | 61.27 | 8.44  | 107 | 0 | 19.69 | 0.028 |
| P04406 | Glyceraldehyde 3 phosphate dehydrogenase             | 36030  | 8.70 | 1213.66 | 20 | 21  | 69.55 | 7.66  | 252 | 2 | 16.44 | 0.028 |
| P63104 | 14 3 3 protein zeta delta                            | 27727  | 4.53 | 724.46  | 19 | 25  | 58.37 | 6.31  | 142 | 0 | 17.60 | 0.033 |
| Q15942 | Zyxin                                                | 61238  | 6.21 | 435.40  | 19 | 29  | 46.68 | 7.64  | 114 | 2 | 22.43 | 0.035 |
| P34931 | Heat shock 70 kDa protein 1L                         | 70331  | 5.65 | 403.11  | 19 | 48  | 33.23 | 12.07 | 107 | 1 | 24.31 | 0.035 |
| P68133 | Actin alpha skeletal muscle                          | 42023  | 5.07 | 1343.98 | 19 | 34  | 63.40 | 8.15  | 287 | 7 | 16.76 | 0.030 |
| Q01518 | Adenylyl cyclase associated protein 1                | 51822  | 8.13 | 566.67  | 18 | 44  | 50.74 | 7.37  | 137 | 2 | 18.16 | 0.029 |
| P00924 | Enolase 1                                            | 46773  | 6.15 | 458.96  | 18 | 28  | 45.77 | 10.46 | 126 | 1 | 19.19 | 0.034 |
| P31146 | Coronin 1A                                           | 50993  | 6.24 | 451.15  | 18 | 36  | 50.33 | 6.92  | 127 | 3 | 18.65 | 0.034 |
| P37802 | Transgelin 2                                         | 22377  | 8.45 | 1069.77 | 18 | 25  | 85.43 | 5.92  | 217 | 2 | 15.18 | 0.033 |
| P06733 | Alpha enolase                                        | 47139  | 7.17 | 736.42  | 17 | 31  | 53.69 | 6.93  | 126 | 0 | 18.34 | 0.033 |
| P04075 | Fructose bisphosphate aldolase A                     | 39395  | 8.06 | 682.54  | 17 | 32  | 54.95 | 10.15 | 151 | 2 | 18.12 | 0.033 |
| Q562R1 | Beta actin like protein 2                            | 41975  | 5.25 | 810.08  | 17 | 35  | 62.77 | 10.13 | 207 | 6 | 17.99 | 0.033 |
| Q9NY65 | Tubulin alpha 8 chain                                | 50061  | 4.76 | 520.08  | 16 | 35  | 65.92 | 7.63  | 146 | 3 | 20.96 | 0.035 |
| P50552 | Vasodilator stimulated phosphoprotein                | 39805  | 9.33 | 394.41  | 16 | 30  | 53.68 | 9.75  | 108 | 0 | 20.61 | 0.036 |
| Q8WVQ1 | Soluble calcium activated nucleotidase 1             | 44811  | 5.65 | 386.34  | 16 | 31  | 53.12 | 9.89  | 124 | 4 | 23.83 | 0.034 |
| O00299 | Chloride intracellular channel protein 1             | 26905  | 4.90 | 325.39  | 16 | 20  | 75.10 | 6.42  | 107 | 2 | 23.31 | 0.032 |
| P62258 | 14 3 3 protein epsilon                               | 29155  | 4.44 | 307.41  | 16 | 30  | 52.55 | 7.25  | 85  | 1 | 20.10 | 0.032 |
| P08567 | Pleckstrin                                           | 40071  | 8.34 | 862.88  | 16 | 27  | 53.71 | 7.71  | 165 | 2 | 18.89 | 0.030 |
| P68366 | Tubulin alpha 4A chain                               | 49892  | 4.75 | 873.46  | 15 | 35  | 54.91 | 8.15  | 156 | 1 | 17.68 | 0.031 |
| P07437 | Tubulin beta chain                                   | 49638  | 4.59 | 754.03  | 15 | 31  | 57.66 | 5.82  | 134 | 2 | 18.22 | 0.032 |
| P04350 | Tubulin beta 4 chain                                 | 49553  | 4.59 | 679.75  | 15 | 31  | 54.05 | 9.00  | 121 | 1 | 18.15 | 0.032 |
| P09972 | Fructose bisphosphate aldolase C                     | 39431  | 6.43 | 394.13  | 15 | 34  | 54.67 | 7.99  | 109 | 2 | 21.92 | 0.031 |
| Q9Y247 | Protein FAM50B                                       | 38684  | 9.28 | 326.59  | 15 | 36  | 38.46 | 6.27  | 80  | 0 | 21.84 | 0.037 |
| A5A3E0 | ANKRD26 like family C member 1B                      | 121366 | 5.77 | 1458.45 | 15 | 101 | 24.74 | 9.61  | 171 | 4 | 17.25 | 0.030 |
| P67936 | Tropomyosin alpha 4 chain                            | 28504  | 4.47 | 487.13  | 14 | 29  | 56.45 | 6.88  | 117 | 2 | 20.56 | 0.034 |
| O95810 | Serum deprivation response protein                   | 47144  | 4.96 | 372.79  | 14 | 28  | 45.18 | 8.67  | 98  | 2 | 21.19 | 0.031 |
| P68032 | Actin alpha cardiac muscle 1                         | 41991  | 5.07 | 1350.89 | 14 | 34  | 49.60 | 9.07  | 221 | 1 | 15.47 | 0.029 |
| P68363 | Tubulin alpha 1B chain                               | 50119  | 4.76 | 886.05  | 13 | 35  | 49.22 | 8.16  | 147 | 1 | 17.33 | 0.030 |
| P68371 | Tubulin beta 2C chain                                | 49799  | 4.60 | 751.17  | 13 | 31  | 47.87 | 5.23  | 107 | 0 | 15.12 | 0.032 |
| Q71U36 | Tubulin alpha 1A chain                               | 50103  | 4.76 | 743.62  | 13 | 35  | 50.11 | 8.03  | 136 | 2 | 17.78 | 0.032 |
| Q3ZCM7 | Tubulin beta 8 chain                                 | 49743  | 4.60 | 385.15  | 13 | 31  | 46.62 | 10.96 | 102 | 5 | 22.01 | 0.036 |
| Q9BUN1 | Uncharacterized protein C1orf56                      | 36746  | 8.59 | 317.28  | 13 | 25  | 54.25 | 7.39  | 96  | 1 | 24.42 | 0.035 |
| P28062 | Proteasome subunit beta type 8                       | 30334  | 7.66 | 264.56  | 13 | 26  | 52.54 | 10.23 | 80  | 5 | 25.36 | 0.037 |
| Q13347 | Eukaryotic translation initiation factor 3 subunit I | 36478  | 5.26 | 264.09  | 13 | 29  | 57.85 | 10.41 | 84  | 4 | 24.33 | 0.038 |
| P68871 | Hemoglobin subunit beta                              | 15988  | 6.88 | 895.99  | 13 | 13  | 83.67 | 6.60  | 179 | 0 | 13.67 | 0.027 |
| Q9BQE3 | Tubulin alpha 1C chain                               | 49863  | 4.79 | 752.73  | 12 | 35  | 44.77 | 7.80  | 121 | 0 | 17.06 | 0.032 |
| Q9BYX7 | Kappa actin                                          | 41988  | 5.88 | 664.41  | 12 | 30  | 53.33 | 9.87  | 132 | 4 | 19.66 | 0.034 |
| P60660 | Myosin light polypeptide 6                           | 16919  | 4.36 | 611.30  | 12 | 15  | 76.16 | 7.13  | 110 | 1 | 17.16 | 0.035 |



|        |                                              |       |      |         |    |    |       |       |     |   |       |       |
|--------|----------------------------------------------|-------|------|---------|----|----|-------|-------|-----|---|-------|-------|
| P23528 | Cofilin 1                                    | 18490 | 8.22 | 523.31  | 12 | 19 | 70.48 | 6.86  | 105 | 1 | 17.29 | 0.029 |
| Q13509 | Tubulin beta 3 chain                         | 50400 | 4.64 | 511.98  | 12 | 31 | 46.67 | 10.63 | 78  | 0 | 22.39 | 0.028 |
| P08107 | Heat shock 70 kDa protein 1                  | 70009 | 5.32 | 449.40  | 12 | 49 | 30.73 | 10.45 | 68  | 1 | 24.89 | 0.037 |
| P09104 | Gamma enolase                                | 47239 | 4.72 | 397.15  | 12 | 30 | 54.38 | 9.41  | 85  | 4 | 22.96 | 0.038 |
| Q9HCU5 | Prolactin regulatory element binding protein | 45439 | 7.77 | 194.32  | 12 | 26 | 51.08 | 9.42  | 83  | 3 | 23.48 | 0.038 |
| P63267 | Actin gamma enteric smooth muscle            | 41849 | 5.16 | 1298.29 | 12 | 33 | 38.83 | 7.52  | 212 | 1 | 15.95 | 0.028 |
| Q15404 | Ras suppressor protein 1                     | 31520 | 9.14 | 282.75  | 11 | 23 | 68.95 | 8.92  | 95  | 2 | 23.81 | 0.036 |
| P47756 | F actin capping protein subunit beta         | 31330 | 5.21 | 271.17  | 11 | 29 | 44.77 | 12.01 | 59  | 1 | 27.78 | 0.035 |
| P62736 | Actin aortic smooth muscle                   | 41981 | 5.08 | 1322.81 | 11 | 34 | 33.95 | 7.10  | 208 | 1 | 14.49 | 0.029 |
| P48741 | Putative heat shock 70 kDa protein 7         | 40219 | 7.86 | 505.43  | 10 | 29 | 48.50 | 10.64 | 97  | 3 | 23.61 | 0.037 |
| Q13748 | Tubulin alpha 3C D chain                     | 49927 | 4.80 | 528.15  | 10 | 35 | 41.56 | 8.49  | 102 | 1 | 19.12 | 0.034 |
| P62937 | Peptidyl prolyl cis trans isomerase A        | 18000 | 7.85 | 413.90  | 9  | 12 | 61.21 | 7.18  | 61  | 1 | 18.10 | 0.034 |
| Q6PEY2 | Tubulin alpha 3E chain                       | 49884 | 4.79 | 409.56  | 9  | 34 | 36.89 | 7.87  | 88  | 1 | 19.76 | 0.036 |
| O15144 | Actin related protein 2 3 complex subunit 2  | 34311 | 6.98 | 203.85  | 9  | 37 | 34.00 | 8.15  | 44  | 1 | 25.33 | 0.038 |
| P07737 | Profilin 1                                   | 15044 | 8.46 | 538.58  | 9  | 17 | 79.29 | 8.41  | 118 | 3 | 15.62 | 0.027 |
| P02042 | Hemoglobin subunit delta                     | 16045 | 8.24 | 377.44  | 8  | 13 | 71.43 | 8.32  | 74  | 1 | 17.46 | 0.030 |
| P07951 | Tropomyosin beta chain                       | 32830 | 4.46 | 376.00  | 8  | 28 | 31.69 | 7.05  | 63  | 1 | 20.44 | 0.031 |
| P24844 | Myosin regulatory light polypeptide 9        | 19814 | 4.59 | 294.77  | 8  | 19 | 58.72 | 8.45  | 54  | 2 | 20.47 | 0.037 |
| P13929 | Beta enolase                                 | 46957 | 7.66 | 237.33  | 8  | 28 | 26.04 | 9.35  | 53  | 2 | 21.48 | 0.038 |
| Q13885 | Tubulin beta 2A chain                        | 49874 | 4.59 | 679.01  | 8  | 31 | 35.51 | 9.97  | 85  | 2 | 18.06 | 0.034 |
| O14950 | Myosin regulatory light chain MRLC2          | 19766 | 4.49 | 413.41  | 7  | 19 | 57.56 | 3.27  | 51  | 0 | 16.71 | 0.033 |
| P19105 | Myosin regulatory light chain MRLC3          | 19781 | 4.45 | 388.87  | 7  | 19 | 40.35 | 2.98  | 51  | 0 | 15.27 | 0.033 |
| Q9Y281 | Cofilin 2                                    | 18724 | 8.16 | 352.18  | 7  | 18 | 55.42 | 5.69  | 56  | 1 | 18.68 | 0.028 |
| P09493 | Tropomyosin alpha 1 chain                    | 32688 | 4.49 | 306.85  | 7  | 28 | 24.65 | 8.48  | 52  | 0 | 19.01 | 0.031 |
| P14649 | Myosin light chain 6B                        | 22749 | 5.42 | 255.00  | 7  | 18 | 66.83 | 8.30  | 64  | 4 | 21.07 | 0.036 |

Healty PLT LC-MS run 1: PLT\_sani\_290709\_01

| Protein name                                       | Peptide Rank | Peptide Modification                                                    | Peptide Sequence                  | Peptide sequence start | Peptide sequence Length | Peptide Matched Products | Score  | By Matches                                                             | Precursor MH+ (Da) | Retention time (min) | Intensity | z | Precursor m/z | MH+ Error (ppm) |
|----------------------------------------------------|--------------|-------------------------------------------------------------------------|-----------------------------------|------------------------|-------------------------|--------------------------|--------|------------------------------------------------------------------------|--------------------|----------------------|-----------|---|---------------|-----------------|
| A5A3E0 A26CB_HUMAN ANKRD26-like family C member 1B | 1            |                                                                         | SYELPDGQVITIGNER                  | 938                    | 16                      | 26                       | 193.4  | b2b3b4°b4b8b9°b9b10b12°b12y3*y3y4*y4y5y6*y6y7y8y10*y10y11y12°y12y13y16 | 1790.90            | 71.713               | 2411471   | 2 | 895.95        | 2.39            |
| A5A3E0 A26CB_HUMAN ANKRD26-like family C member 1B | 2            |                                                                         | AVFPSIVGRPR                       | 728                    | 11                      | 14                       | 114.32 | b2b3y1y2y3y4y5y6y7y8°y8y9y10y11                                        | 1198.70            | 56.497               | 1585024   | 2 | 599.86        | -1.32           |
| A5A3E0 A26CB_HUMAN ANKRD26-like family C member 1B | 3            |                                                                         | AGFAGDDAPR                        | 718                    | 10                      | 17                       | 127.22 | b2b3b4b8y1y2y3y4°y4y5y6°y6y7°y7y8y9y10                                 | 976.44             | 31.469               | 1341809   | 2 | 488.73        | -4.50           |
| A5A3E0 A26CB_HUMAN ANKRD26-like family C member 1B | 4            |                                                                         | QEYDESGPSIVHRK                    | 1059                   | 14                      | 18                       | 140.35 | b3°b3*b3b14y2y3y4y5y6y7y8y9y10°y10y11y12y14*y14                        | 1644.78            | 32.324               | 365178    | 3 | 548.93        | -12.02          |
| A5A3E0 A26CB_HUMAN ANKRD26-like family C member 1B | 5            |                                                                         | QEYDESGPSIVHR                     | 1059                   | 13                      | 9                        | 93.28  | y2y3y4y5y6y8y10°y10y11                                                 | 1516.69            | 38.236               | 317262    | 3 | 506.24        | -7.73           |
| A5A3E0 A26CB_HUMAN ANKRD26-like family C member 1B | 6            |                                                                         | ISSENSNPEQDLK                     | 367                    | 13                      | 5                        | 28.31  | y5y9*y9y10°y10                                                         | 1460.67            | 54.625               | 36683     | 3 | 487.56        | -10.70          |
| A5A3E0 A26CB_HUMAN ANKRD26-like family C member 1B | 7            |                                                                         | IWHHTFYNELR                       | 784                    | 11                      | 6                        | 24.51  | b10°b10y6°y6y8*y8                                                      | 1515.76            | 56.234               | 11854     | 2 | 758.38        | 5.32            |
| A5A3E0 A26CB_HUMAN ANKRD26-like family C member 1B | 8            |                                                                         | VVEVDSMPAASSVK                    | 1                      | 14                      | 3                        | 19.46  | b7y7y12                                                                | 1418.73            | 50.697               | 133456    | 2 | 709.87        | 7.31            |
| A5A3E0 A26CB_HUMAN ANKRD26-like family C member 1B | 9            | Carbamidomethyl+C(3)                                                    | QFCEEQNTGILHDEILHEEK              | 601                    | 21                      | 4                        | 23.66  | b10b12*b12b13                                                          | 2582.21            | 69.647               | 39657     | 3 | 861.41        | -3.12           |
| A5A3E0 A26CB_HUMAN ANKRD26-like family C member 1B | 10           | Carbamidomethyl+C(2)                                                    | LCYVALDFEQEMATVASSSSLEK           | 915                    | 23                      | 4                        | 20.32  | b5y6y11y13                                                             | 2578.25            | 117.858              | 20303     | 3 | 860.09        | 18.28           |
| A5A3E0 A26CB_HUMAN ANKRD26-like family C member 1B | 11           |                                                                         | EIAALAPSMMK                       | 1015                   | 11                      | 5                        | 24.51  | b3°b3b5y5°y5                                                           | 1161.63            | 36.006               | 8519      | 2 | 581.32        | 21.33           |
| A5A3E0 A26CB_HUMAN ANKRD26-like family C member 1B | 12           | Carbamidomethyl+C(1);<br>Carbamidomethyl+C(9);<br>Carbamidomethyl+C(16) | CPEALFQPCFLGMESCGIHETTFN<br>SIMK  | 956                    | 28                      | 7                        | 25.28  | b3b4y11°y11y14°y14*y14                                                 | 3304.47            | 83.247               | 6051      | 4 | 826.87        | 3.84            |
| A5A3E0 A26CB_HUMAN ANKRD26-like family C member 1B | 13           |                                                                         | ELENFMAIEEMK                      | 531                    | 12                      | 3                        | 22.47  | b5b9y7                                                                 | 1483.69            | 55.766               | 4370      | 3 | 495.24        | 7.49            |
| A5A3E0 A26CB_HUMAN ANKRD26-like family C member 1B | 14           |                                                                         | DLYTNTVLSGGTTMYPGMAHR             | 991                    | 21                      | 9                        | 58.05  | b7b12°b12°b12y6y7y8y9y13                                               | 2285.04            | 136.254              | 3046      | 2 | 1143.02       | -11.97          |
| A5A3E0 A26CB_HUMAN ANKRD26-like family C member 1B | 15           |                                                                         | HESNNVGLLENLTNGVTAGNGD<br>NGLIPQR | 421                    | 29                      | 5                        | 36.5   | b6°b6b7b8b14                                                           | 3003.52            | 86.213               | 2691      | 4 | 751.63        | 9.75            |
| A5A3E0 A26CB_HUMAN ANKRD26-like family C member 1B | 16           |                                                                         | MVVEVDSMPAASSVK                   | 0                      | 15                      | 4                        | 38.09  | b12b13y12y13                                                           | 1549.79            | 59.677               | 2510      | 3 | 517.27        | 20.01           |
| A5A3E0 A26CB_HUMAN ANKRD26-like family C member 1B | 17           | Carbamidomethyl+C(25)                                                   | ALQLNELTMDDDTAVLVIDNGSG<br>MCK    | 692                    | 26                      | 5                        | 22.01  | b3b4y12°y12*y12                                                        | 2823.26            | 118.936              | 1818      | 3 | 941.76        | -20.23          |

|                                                                             |    |                                                                 |                                |     |    |    |       |                                                                 |         |         |        |   |         |        |
|-----------------------------------------------------------------------------|----|-----------------------------------------------------------------|--------------------------------|-----|----|----|-------|-----------------------------------------------------------------|---------|---------|--------|---|---------|--------|
| A5A3E0 A26CB_HUMAN ANKRD26-like family C member 1B                          | 18 | Phosphoryl STY(15)                                              | STHVGFPENLTNGATAGNGDDGLIPPRK   | 546 | 28 | 5  | 11.78 | b13°b13y12y15*y15                                               | 2915.34 | 87.085  | 5823   | 3 | 972.45  | -6.62  |
| A5A3E0 A26CB_HUMAN ANKRD26-like family C member 1B                          | 19 | Oxidation+M(14)                                                 | SNVGASGDHDDSAMK                | 77  | 15 | 6  | 18.31 | b3°b3*b3b14y7°y7                                                | 1506.60 | 25.925  | 434211 | 2 | 753.80  | -10.53 |
| A5A3E0 A26CB_HUMAN ANKRD26-like family C member 1B                          | 20 | Oxidation+M()                                                   | YPMEHGIIITNWDDMEK              | 768 | 16 | 6  | 24.51 | b5b13°b13*b13y4y7                                               | 1994.87 | 52.731  | 13291  | 2 | 997.94  | 4.47   |
| A5A3E0 A26CB_HUMAN ANKRD26-like family C member 1B                          | 21 | Carbamidomethyl+C(25);Oxidation+M()                             | ALQLNELTMDDDTAVLVIDNGSGMCK     | 692 | 26 | 4  | 22.9  | b10°b10b11b13                                                   | 2839.35 | 105.251 | 2812   | 3 | 947.12  | 11.01  |
| A6NKZ8 YI016_HUMAN Putative tubulin beta chain-like protein ENSP00000290377 | 1  |                                                                 | LAVNMVPPFR                     | 180 | 10 | 10 | 88.11 | b2b5*b5y4y5y6y7y8y9y10                                          | 1143.63 | 73.053  | 165955 | 2 | 572.32  | -2.99  |
| A6NKZ8 YI016_HUMAN Putative tubulin beta chain-like protein ENSP00000290377 | 2  | Carbamidomethyl+C(23)                                           | LPTPTYGDLNHLVSATMSGVTTCLR      | 144 | 25 | 4  | 8.52  | b11y5°y5y25                                                     | 2704.36 | 82.680  | 7501   | 2 | 1352.68 | 6.32   |
| A6NKZ8 YI016_HUMAN Putative tubulin beta chain-like protein ENSP00000290377 | 3  | Carbamidomethyl+C(18)                                           | MSASFIGNNAAIQELFTCVSEQFTAMFR   | 290 | 28 | 6  | 28.45 | b7b10b13b17y4y10                                                | 3170.43 | 101.181 | 6481   | 4 | 793.36  | -13.86 |
| A6NKZ8 YI016_HUMAN Putative tubulin beta chain-like protein ENSP00000290377 | 4  | Carbamidomethyl+C(18);Oxidation+M(1)                            | MSASFIGNNAAIQELFTCVSEQFTAMFR   | 290 | 28 | 3  | 11.78 | b11y6y9                                                         | 3186.45 | 84.897  | 45538  | 3 | 1062.82 | -5.06  |
| A6NKZ8 YI016_HUMAN Putative tubulin beta chain-like protein ENSP00000290377 | 5  | Oxidation+M()                                                   | YTEGAELTESVMDVVR               | 33  | 16 | 6  | 39.12 | b4°b4b6b8b13°b13                                                | 1814.86 | 48.046  | 22233  | 3 | 605.62  | 5.92   |
| A6NNZ2 TBB8B_HUMAN Tubulin beta-8 chain B                                   | 1  |                                                                 | LAVNMVPPFR                     | 252 | 10 | 10 | 88.11 | b2b5*b5y4y5y6y7y8y9y10                                          | 1143.63 | 73.053  | 165955 | 2 | 572.32  | -2.99  |
| A6NNZ2 TBB8B_HUMAN Tubulin beta-8 chain B                                   | 2  | Carbamidomethyl+C(23)                                           | LPTPTYGDLNHLVSATMSGVTTCLR      | 216 | 25 | 4  | 8.52  | b11y5°y5y25                                                     | 2704.36 | 82.680  | 7501   | 2 | 1352.68 | 6.32   |
| A6NNZ2 TBB8B_HUMAN Tubulin beta-8 chain B                                   | 3  |                                                                 | NSSYFADWFPDNVK                 | 336 | 14 | 3  | 35.03 | y6y7y8                                                          | 1689.78 | 33.100  | 112197 | 3 | 563.93  | 16.54  |
| A6NNZ2 TBB8B_HUMAN Tubulin beta-8 chain B                                   | 4  |                                                                 | INVHHHEASGGR                   | 46  | 12 | 5  | 34.53 | b5*b5b9b10y8                                                    | 1313.65 | 38.741  | 9259   | 3 | 438.55  | 1.67   |
| A6NNZ2 TBB8B_HUMAN Tubulin beta-8 chain B                                   | 5  | Carbamidomethyl+C(10)                                           | EIVLTQTGQCGNQIGAK              | 2   | 17 | 3  | 16.47 | b11b13y16                                                       | 1816.96 | 136.743 | 2542   | 1 | 1816.96 | 20.96  |
| A6NNZ2 TBB8B_HUMAN Tubulin beta-8 chain B                                   | 6  |                                                                 | INVHHHEASGGRYVPR               | 46  | 16 | 7  | 28.59 | b14°b14y12y14°y14y15*y15                                        | 1828.95 | 136.756 | 1901   | 1 | 1828.95 | 10.95  |
| A6NNZ2 TBB8B_HUMAN Tubulin beta-8 chain B                                   | 7  | Carbamidomethyl+C(12);Oxidation+M(1)                            | MREIVLTQTGQCGNQIGAK            | 0   | 19 | 3  | 15.08 | b3b15y9                                                         | 2120.04 | 82.596  | 29311  | 3 | 707.35  | -10.82 |
| O00151 PDL1_HUMAN PDZ and LIM domain protein 1                              | 1  | Carbamidomethyl+C(7)                                            | AALANLCIGDVITAIDGENTSNMTHLEAQR | 38  | 31 | 23 | 148.5 | b3b5*b5b8y3y4*y4y5*y5y6y7y10°y10*y10y11y13y14y15y19y22y23y28y31 | 3312.60 | 96.298  | 110343 | 3 | 1104.87 | 0.44   |
| O00151 PDL1_HUMAN PDZ and LIM domain protein 1                              | 2  |                                                                 | LVGGKDFEQPLAIR                 | 17  | 15 | 6  | 36.97 | b2y4y6y13y14y15                                                 | 1629.88 | 59.214  | 57256  | 3 | 543.97  | -7.56  |
| O00151 PDL1_HUMAN PDZ and LIM domain protein 1                              | 3  |                                                                 | MNLASEPQEVLHIGSAHR             | 103 | 19 | 16 | 77.84 | b2b4b11b13°b13y2y5y6°y6*y6y7*y7y8y13y15y19                      | 2103.04 | 62.356  | 20141  | 3 | 701.68  | -1.63  |
| O00151 PDL1_HUMAN PDZ and LIM domain protein 1                              | 4  |                                                                 | SAMPFTASPASTAR                 | 122 | 16 | 6  | 40.09 | b1y9y10y11y13y16                                                | 1582.76 | 50.887  | 17652  | 2 | 791.88  | 4.63   |
| O00151 PDL1_HUMAN PDZ and LIM domain protein 1                              | 5  | Carbamidomethyl+C(4);Carbamidomethyl+C(7);Carbamidomethyl+C(10) | HPECYVCTDCGTNLK                | 279 | 15 | 5  | 29.7  | b6y2y6y9y10                                                     | 1853.78 | 39.052  | 6871   | 2 | 927.39  | 8.56   |

|                                                             |    |                                             |                                                  |     |    |    |        |                                     |         |         |        |   |         |        |
|-------------------------------------------------------------|----|---------------------------------------------|--------------------------------------------------|-----|----|----|--------|-------------------------------------|---------|---------|--------|---|---------|--------|
| O00151 PDLI1_HUMAN PDZ and LIM domain protein 1             | 6  |                                             | VAASIGNAQK                                       | 246 | 10 | 3  | 27.12  | b9y5y8                              | 958.53  | 24.170  | 11245  | 2 | 479.77  | -0.32  |
| O00151 PDLI1_HUMAN PDZ and LIM domain protein 1             | 7  | Carbamidomethyl+C(4)                        | LPMCDK                                           | 256 | 6  | 1  | 13.7   | b4                                  | 763.35  | 85.183  | 8701   | 1 | 763.35  | 6.96   |
| O00151 PDLI1_HUMAN PDZ and LIM domain protein 1             | 8  |                                             | QSTSFLVLQEILESEEK                                | 211 | 17 | 3  | 16.47  | b9y7y12                             | 1980.04 | 91.663  | 5835   | 3 | 660.68  | 9.06   |
| O00151 PDLI1_HUMAN PDZ and LIM domain protein 1             | 9  |                                             | MTTQQIDLQGGPWGFR                                 | 0   | 17 | 8  | 33.08  | b3*b3b5*b5b9*b9y3y8                 | 1931.96 | 102.657 | 3890   | 2 | 966.48  | 7.27   |
| O00151 PDLI1_HUMAN PDZ and LIM domain protein 1             | 10 |                                             | SEHKVWSPLVTEEGK                                  | 83  | 15 | 8  | 48.01  | b5b8b9b14*b14y3*y3y13               | 1725.86 | 86.230  | 20603  | 3 | 575.96  | -11.03 |
| O00151 PDLI1_HUMAN PDZ and LIM domain protein 1             | 11 |                                             | SAMPFTASPASSTTARVITNQYNN<br>PAGLYSSENISNFNNALESK | 122 | 44 | 8  | 42.61  | y9y12*y12y13y14*y14y19y26           | 4665.18 | 101.176 | 16522  | 4 | 1167.05 | -7.22  |
| O00151 PDLI1_HUMAN PDZ and LIM domain protein 1             | 12 | Carbamidomethyl+C(11)                       | GHFFVEDQIYCEKHAR                                 | 296 | 16 | 4  | 35.32  | y8y9y11y13                          | 2035.95 | 83.232  | 9128   | 2 | 1018.48 | 1.80   |
| O00151 PDLI1_HUMAN PDZ and LIM domain protein 1             | 13 | Carbamidomethyl+C(2)                        | GCTDNLTLTVARSEHK                                 | 71  | 16 | 5  | 17.33  | b9*b9b14*b14y3                      | 1801.89 | 69.626  | 6092   | 2 | 901.45  | 3.59   |
| O00151 PDLI1_HUMAN PDZ and LIM domain protein 1             | 14 |                                             | MNLASEPQEV LHIGSAHNRSAMP<br>FTASPASSTTAR         | 103 | 35 | 8  | 40.01  | b3b8y3y8y9y13y14*y14                | 3666.81 | 112.210 | 3008   | 3 | 1222.94 | 8.39   |
| O00151 PDLI1_HUMAN PDZ and LIM domain protein 1             | 15 | Oxidation+M(1)                              | MNLASEPQEV LHIGSAHNR                             | 103 | 19 | 4  | 20.92  | b4b13y6y11                          | 2119.06 | 112.320 | 2944   | 3 | 707.03  | 13.36  |
| O00151 PDLI1_HUMAN PDZ and LIM domain protein 1             | 16 |                                             | GGKDFEQPLAISR                                    | 19  | 13 | 1  | 7.27   | b5                                  | 1417.75 | 59.170  | 2644   | 2 | 709.38  | 1.29   |
| O00299 CLIC1_HUMAN Chloride intracellular channel protein 1 | 1  |                                             | LAALNPESNTAGLDIFAK                               | 95  | 18 | 13 | 88.23  | b2b3b5b15y3y4y5y12*y12y13*y13y14y18 | 1844.99 | 80.962  | 80890  | 2 | 923.00  | 8.01   |
| O00299 CLIC1_HUMAN Chloride intracellular channel protein 1 | 2  |                                             | VLDNYLTSPLPEEVD ETSAEDEGV<br>SQRK                | 138 | 28 | 4  | 17.8   | y4y10y21y28                         | 3120.50 | 70.513  | 33693  | 3 | 1040.84 | 5.32   |
| O00299 CLIC1_HUMAN Chloride intracellular channel protein 1 | 3  |                                             | GVTFNVTTVDTKR                                    | 37  | 13 | 5  | 28.31  | b4b5b11*b11y13                      | 1437.78 | 137.863 | 3491   | 2 | 719.39  | 6.45   |
| O00299 CLIC1_HUMAN Chloride intracellular channel protein 1 | 4  |                                             | VLDNYLTSPLPEEVD ETSAEDEGV<br>SQR                 | 138 | 27 | 6  | 21.45  | b8b20y4y9*y9y12                     | 2992.36 | 129.797 | 1696   | 3 | 998.13  | -9.38  |
| O00299 CLIC1_HUMAN Chloride intracellular channel protein 1 | 5  | Carbamidomethyl+C(7)                        | EEFASTCPDDEEIELAYEQVAK                           | 216 | 22 | 5  | 21.07  | b3y6y8y12*y12                       | 2573.15 | 78.281  | 38026  | 2 | 1287.08 | 8.73   |
| O00299 CLIC1_HUMAN Chloride intracellular channel protein 1 | 6  | Carbamidomethyl+C(4)                        | IGNCPFSQR                                        | 20  | 9  | 3  | 30.7   | b3y5y8                              | 1078.51 | 38.293  | 33023  | 2 | 539.76  | -0.34  |
| O00299 CLIC1_HUMAN Chloride intracellular channel protein 1 | 7  |                                             | GVTFNVTTVDTK                                     | 37  | 12 | 4  | 32.68  | y3y5*y5y10                          | 1281.68 | 56.059  | 28254  | 2 | 641.34  | 7.52   |
| O00299 CLIC1_HUMAN Chloride intracellular channel protein 1 | 8  |                                             | NSNPALNDNLEK                                     | 119 | 12 | 14 | 103.92 | b3*b3b4*b4b5b6*b6b8y4y5*y5y6y9*y9   | 1328.65 | 38.057  | 27232  | 2 | 664.83  | 2.30   |
| O00299 CLIC1_HUMAN Chloride intracellular channel protein 1 | 9  | Carbamidomethyl+C(2)                        | LCPGGQLPFLLYGTEVHTDTNK                           | 57  | 22 | 4  | 27.12  | b9b10y5y20                          | 2460.22 | 106.342 | 7958   | 3 | 820.74  | -1.98  |
| O00299 CLIC1_HUMAN Chloride intracellular channel protein 1 | 10 | Carbamidomethyl+C(10)                       | IEEFLEAVLCPFR                                    | 79  | 13 | 4  | 20.83  | b6b11*b11y8                         | 1572.78 | 56.100  | 4422   | 2 | 786.89  | -20.96 |
| O00299 CLIC1_HUMAN Chloride intracellular channel protein 1 | 11 | Carbamidomethyl+C(12)                       | FLDGNELTLADCNLLPK                                | 166 | 17 | 3  | 16.47  | b6y10y14                            | 1932.98 | 126.176 | 3262   | 3 | 645.00  | 5.24   |
| O00299 CLIC1_HUMAN Chloride intracellular channel protein 1 | 12 |                                             | FSAYIKNSNPALNDNLEK                               | 113 | 18 | 3  | 15.73  | b3b8y6                              | 2038.03 | 61.482  | 254048 | 2 | 1019.52 | 3.83   |
| O00299 CLIC1_HUMAN Chloride intracellular channel protein 1 | 13 | Carbamidomethyl+C(13)                       | KFLDGNELTLADCNLLPK                               | 165 | 18 | 4  | 21.98  | b7b10y7y17                          | 2061.06 | 80.148  | 19482  | 3 | 687.69  | -6.28  |
| O00299 CLIC1_HUMAN Chloride intracellular channel protein 1 | 14 |                                             | MAEEQPQVELFVKAGSDGAK                             | 0   | 20 | 4  | 19.98  | b8b15y5y7                           | 2134.02 | 101.216 | 14988  | 2 | 1067.51 | -12.47 |
| O00299 CLIC1_HUMAN Chloride intracellular channel protein 1 | 15 |                                             | AEEQPQVELFVKAGSDGAK                              | 1   | 19 | 6  | 40.74  | b6b9b18y4y6y7                       | 2003.00 | 72.818  | 8348   | 3 | 668.34  | -6.09  |
| O00299 CLIC1_HUMAN Chloride intracellular channel protein 1 | 16 | Carbamidomethyl+C(2);<br>Phosphoryl STY(18) | LCPGGQLPFLLYGTEVHTDTNK                           | 57  | 22 | 5  | 25.89  | b6b13b17y6y16                       | 2540.18 | 92.971  | 1555   | 2 | 1270.59 | -1.35  |
| O00299 CLIC1_HUMAN Chloride intracellular channel protein 1 | 17 |                                             | VLDNYLTSPLPEEVD ETSAEDEGV<br>SQR                 | 138 | 27 | 1  | 8.61   | b9                                  | 2975.38 | 129.763 | 16284  | 3 | 992.46  | 5.17   |

|                                                        |    |                       |                                                  |     |    |    |        |                                                                                       |         |         |        |   |         |        |
|--------------------------------------------------------|----|-----------------------|--------------------------------------------------|-----|----|----|--------|---------------------------------------------------------------------------------------|---------|---------|--------|---|---------|--------|
| O14950 MRLC2_HUMAN Myosin regulatory light chain MRLC2 | 1  |                       | LNGTDPEDVIR                                      | 93  | 11 | 8  | 68.89  | y1y3y4y6y8y9°y9y11                                                                    | 1228.62 | 49.380  | 142462 | 2 | 614.81  | 1.49   |
| O14950 MRLC2_HUMAN Myosin regulatory light chain MRLC2 | 2  |                       | GNFNIEFTR                                        | 151 | 10 | 10 | 95.1   | b2*b2b3b5b9y4y5y7y8y10                                                                | 1260.60 | 67.513  | 120827 | 2 | 630.80  | 0.10   |
| O14950 MRLC2_HUMAN Myosin regulatory light chain MRLC2 | 3  |                       | ATSNVFAMFDQSQIQEFK                               | 17  | 18 | 9  | 34.97  | b5*b5y2y3°y3y4y6y10y18                                                                | 2091.00 | 90.513  | 104332 | 2 | 1046.01 | 9.11   |
| O14950 MRLC2_HUMAN Myosin regulatory light chain MRLC2 | 4  |                       | FTDEEVDELYR                                      | 133 | 11 | 8  | 65.88  | b11y2y5y7y8y9y10y11                                                                   | 1415.64 | 59.898  | 88805  | 2 | 708.32  | 3.10   |
| O14950 MRLC2_HUMAN Myosin regulatory light chain MRLC2 | 5  |                       | ELLTTMGDR                                        | 124 | 9  | 6  | 54.8   | b9y3y5y6y7y9                                                                          | 1035.51 | 49.455  | 30292  | 2 | 518.26  | -3.54  |
| O14950 MRLC2_HUMAN Myosin regulatory light chain MRLC2 | 6  | Oxidation+M()         | ATSNVFAMFDQSQIQEFK                               | 17  | 18 | 4  | 21.98  | b4b14y8y13                                                                            | 2107.00 | 108.818 | 9333   | 2 | 1054.01 | 10.78  |
| O14950 MRLC2_HUMAN Myosin regulatory light chain MRLC2 | 7  | Oxidation+M()         | EAFNMIDQNRDGFIDKEDLHDMLASLGK                     | 35  | 28 | 3  | 22.8   | y8y12y13                                                                              | 3238.54 | 100.594 | 7685   | 3 | 1080.19 | 9.05   |
| O43707 ACTN4_HUMAN Alpha-actinin-4                     | 1  |                       | VGWEQLLTIAR                                      | 733 | 12 | 19 | 167.92 | b1b4b5*b5b6*b6b8b9y2y3y4y5y6y7y8*y8y9y11y12                                           | 1386.77 | 98.548  | 232022 | 2 | 693.89  | -1.14  |
| O43707 ACTN4_HUMAN Alpha-actinin-4                     | 2  |                       | AIMTYVSSFYHAFSGAQK                               | 255 | 18 | 31 | 201.26 | b2b3b5°b5b9b13b14y1y2*y2y4y5°y5y6°y6y7y8°y8*y8y9y10°y10y11y12°y12y13y14y16*y16y18*y18 | 2007.95 | 91.000  | 170186 | 3 | 669.99  | -5.53  |
| O43707 ACTN4_HUMAN Alpha-actinin-4                     | 3  |                       | TINEVENQILTR                                     | 745 | 12 | 9  | 64.02  | b2°b2b9b10y3y4y6y10y12                                                                | 1429.76 | 60.369  | 134055 | 2 | 715.38  | -1.45  |
| O43707 ACTN4_HUMAN Alpha-actinin-4                     | 4  |                       | LASDLLEWIR                                       | 300 | 10 | 5  | 34.11  | y2y3y4y8y10                                                                           | 1215.67 | 92.499  | 118327 | 2 | 608.34  | -3.92  |
| O43707 ACTN4_HUMAN Alpha-actinin-4                     | 5  |                       | KDDPVTNLNNAFEVAEK                                | 216 | 17 | 8  | 33.08  | b3b13*b13y3°y3y6y12y17                                                                | 1903.92 | 71.415  | 35716  | 3 | 635.31  | -9.04  |
| O43707 ACTN4_HUMAN Alpha-actinin-4                     | 6  |                       | VDYHAANQSYQYGPSSAGNGAGGGGSMGDYMAQEDDWRDRLLDPAWEK | 1   | 49 | 5  | 11.38  | b1b14y2y7y17                                                                          | 5265.30 | 87.814  | 33670  | 5 | 1053.87 | 10.02  |
| O43707 ACTN4_HUMAN Alpha-actinin-4                     | 7  |                       | DDPVTNLNNAFEVAEK                                 | 217 | 16 | 4  | 17.33  | b14y8*y8y11                                                                           | 1775.86 | 62.705  | 20904  | 3 | 592.62  | 6.53   |
| O43707 ACTN4_HUMAN Alpha-actinin-4                     | 8  |                       | HEAFESDLAAHQDR                                   | 455 | 14 | 5  | 31.8   | b1b6b8b10y8                                                                           | 1625.72 | 37.389  | 19215  | 3 | 542.58  | -8.33  |
| O43707 ACTN4_HUMAN Alpha-actinin-4                     | 9  | Carbamidomethyl+C(2)  | ICDQWDALGSLTHSR                                  | 497 | 15 | 3  | 18.31  | b4b13y3                                                                               | 1758.81 | 69.648  | 10182  | 3 | 586.94  | -6.94  |
| O43707 ACTN4_HUMAN Alpha-actinin-4                     | 10 | Carbamidomethyl+C(10) | ELPPDQAEYCIAR                                    | 869 | 13 | 4  | 28.31  | y4y6y7y13                                                                             | 1561.73 | 50.799  | 8875   | 2 | 781.37  | 2.03   |
| O43707 ACTN4_HUMAN Alpha-actinin-4                     | 11 |                       | STLPDADREREAILAIHKEAQR                           | 574 | 22 | 7  | 23.43  | b1b2°b2b8b10b11°b11                                                                   | 2519.31 | 136.239 | 8158   | 3 | 840.44  | -8.33  |
| O43707 ACTN4_HUMAN Alpha-actinin-4                     | 12 |                       | ASFNFHDKDHGGALGPPEEFK                            | 771 | 20 | 3  | 22.64  | b11y11y12                                                                             | 2202.99 | 59.028  | 3427   | 3 | 735.00  | -12.19 |
| O43707 ACTN4_HUMAN Alpha-actinin-4                     | 13 |                       | DHALLEEQSK                                       | 633 | 10 | 5  | 28.88  | b4°b4b5°b5y9                                                                          | 1169.57 | 60.761  | 147043 | 2 | 585.29  | -11.69 |
| O43707 ACTN4_HUMAN Alpha-actinin-4                     | 14 |                       | VLAVNQENEHLMEDYEK                                | 283 | 17 | 6  | 26.39  | b8*b8y3°y3y6y11                                                                       | 2060.95 | 69.627  | 62478  | 2 | 1030.98 | -3.32  |
| O43707 ACTN4_HUMAN Alpha-actinin-4                     | 15 |                       | MLDAEDIVNTARPDEK                                 | 239 | 16 | 5  | 17.33  | b4°b4y3y6°y6                                                                          | 1816.88 | 62.967  | 18060  | 3 | 606.30  | 2.22   |
| O43707 ACTN4_HUMAN Alpha-actinin-4                     | 16 |                       | ETTDTDADQVIASFK                                  | 837 | 16 | 3  | 25.03  | y4y8y14                                                                               | 1741.84 | 86.209  | 13008  | 3 | 581.28  | 14.37  |
| O43707 ACTN4_HUMAN Alpha-actinin-4                     | 17 |                       | AGTQIENIDEDFR                                    | 66  | 13 | 4  | 20.83  | b6y4y11°y11                                                                           | 1507.73 | 45.474  | 6321   | 2 | 754.37  | 18.70  |
| O43707 ACTN4_HUMAN Alpha-actinin-4                     | 18 |                       | GISQEQMQEFR                                      | 760 | 11 | 10 | 85.5   | b3b4b6b9°b9b10*b10y5*y5y8                                                             | 1352.65 | 42.628  | 5432   | 2 | 676.83  | 16.06  |
| O43707 ACTN4_HUMAN Alpha-actinin-4                     | 19 | Carbamidomethyl+C(2)  | ACLISLGYDVENDR                                   | 791 | 14 | 5  | 31.01  | b4b5b10°b10y10                                                                        | 1624.76 | 63.178  | 4778   | 4 | 406.95  | -3.08  |

|                                                      |    |                      |                                                  |     |    |    |        |                                                             |         |         |        |   |         |        |
|------------------------------------------------------|----|----------------------|--------------------------------------------------|-----|----|----|--------|-------------------------------------------------------------|---------|---------|--------|---|---------|--------|
| O43707 ACTN4_HUMAN Alpha-actinin-4                   | 20 |                      | IMSLVDPNHSGLVTFQAFIDFMSR                         | 813 | 24 | 13 | 83.25  | b8°b8b9b10°b10b11b13°b13y4y5y12y13°y13                      | 2725.33 | 119.726 | 4294   | 3 | 909.12  | -6.27  |
| O43707 ACTN4_HUMAN Alpha-actinin-4                   | 21 |                      | DHGGALGPEEFK                                     | 779 | 12 | 4  | 22.47  | b11y4y8°y8                                                  | 1256.57 | 32.098  | 4127   | 3 | 419.53  | -19.82 |
| O43707 ACTN4_HUMAN Alpha-actinin-4                   | 22 |                      | DYETATLSDIK                                      | 439 | 11 | 5  | 38.6   | b8b9y6°y6y10                                                | 1255.58 | 136.279 | 2002   | 1 | 1255.58 | -16.24 |
| O43707 ACTN4_HUMAN Alpha-actinin-4                   | 23 | Carbamidomethyl+C(2) | ACLSISLGYDVENDRQGEAEFNR                          | 791 | 22 | 5  | 25.89  | b3b12y8y11y17                                               | 2556.19 | 57.501  | 323310 | 3 | 852.73  | 2.87   |
| O43707 ACTN4_HUMAN Alpha-actinin-4                   | 24 |                      | DHALLEEQSKQSSNEHLR                               | 633 | 18 | 7  | 15.73  | b11°b11°*b11y6°y6y16°y16                                    | 2162.08 | 63.803  | 126968 | 3 | 721.36  | 8.92   |
| O43707 ACTN4_HUMAN Alpha-actinin-4                   | 25 |                      | LRLSNRPAFMPSEGK                                  | 363 | 15 | 5  | 26.39  | y3y5°y5y7°y7                                                | 1702.90 | 98.387  | 24612  | 2 | 851.95  | -4.59  |
| O43707 ACTN4_HUMAN Alpha-actinin-4                   | 26 |                      | QQSNEHLRR                                        | 643 | 9  | 5  | 38.48  | b3°b3b4b8°b8                                                | 1167.59 | 37.253  | 18709  | 2 | 584.30  | -7.21  |
| O43707 ACTN4_HUMAN Alpha-actinin-4                   | 27 |                      | MEEIGRISIEMNGTLEDQLSHLK                          | 668 | 23 | 4  | 23.25  | b7b11°b11b12                                                | 2643.35 | 74.096  | 8220   | 4 | 661.59  | 12.75  |
| O43707 ACTN4_HUMAN Alpha-actinin-4                   | 28 |                      | DAKGISQEQMQEFR                                   | 757 | 14 | 5  | 31.8   | b4b10°b10b12y6                                              | 1666.79 | 44.489  | 5660   | 4 | 417.45  | 1.83   |
| O43707 ACTN4_HUMAN Alpha-actinin-4                   | 29 |                      | KDDPVTNLNNAFEVAEK                                | 216 | 17 | 5  | 25.13  | b4b11°b11b12°b12                                            | 1903.92 | 65.920  | 4403   | 2 | 952.46  | -8.98  |
| O43707 ACTN4_HUMAN Alpha-actinin-4                   | 30 | Carbamidomethyl+C(2) | ICKVLAVNQENEHLMEDYEK                             | 280 | 20 | 7  | 28.31  | b3b12y3y8°y8y11°y11                                         | 2462.14 | 121.814 | 4293   | 3 | 821.38  | -12.99 |
| O43707 ACTN4_HUMAN Alpha-actinin-4                   | 31 |                      | VLAVNQENEHLMEDYEKLASDLL<br>EWIR                  | 283 | 27 | 4  | 22.84  | b10b13°b13b14                                               | 3257.57 | 84.484  | 4225   | 3 | 1086.53 | -12.29 |
| O43707 ACTN4_HUMAN Alpha-actinin-4                   | 32 |                      | QFASQANVVGPIQTKMEEIGR                            | 652 | 22 | 5  | 29.57  | b4°b4b6b7b14                                                | 2489.23 | 100.332 | 4170   | 3 | 830.41  | -12.95 |
| O43707 ACTN4_HUMAN Alpha-actinin-4                   | 33 |                      | MAPYQGPDAVPGALDYKSFSTAL<br>YGESDL                | 882 | 29 | 3  | 17.56  | y8y14y16                                                    | 3063.43 | 52.533  | 3171   | 3 | 1021.81 | -0.72  |
| O43707 ACTN4_HUMAN Alpha-actinin-4                   | 34 |                      | TIQEMQKLEDFR                                     | 323 | 13 | 4  | 29.94  | b9b12y8y10                                                  | 1665.81 | 59.100  | 2000   | 2 | 833.41  | -9.01  |
| O43707 ACTN4_HUMAN Alpha-actinin-4                   | 35 | Oxidation+M(8)       | LSNRPAFMPSEGK                                    | 365 | 13 | 5  | 20.83  | b3°b3°b3b10y5                                               | 1449.72 | 60.476  | 24324  | 3 | 483.91  | 2.86   |
| O43707 ACTN4_HUMAN Alpha-actinin-4                   | 36 |                      | STLPDADRERE                                      | 574 | 11 | 0  | 6.75   |                                                             | 1288.61 | 136.262 | 1960   | 1 | 1288.61 | -5.49  |
| O95810 SDPR_HUMAN Serum deprivation-response protein | 1  |                      | VLIFQEENEIPASVFK                                 | 156 | 17 | 22 | 168.73 | b1b2b3b4b5b8b9°b9b10b14°b14°*b14y3y4y5y7y11°y11y12y13y14y17 | 1962.07 | 89.590  | 212739 | 2 | 981.54  | 5.04   |
| O95810 SDPR_HUMAN Serum deprivation-response protein | 2  |                      | LVNMLDAVQENQHK                                   | 64  | 14 | 10 | 60.83  | b3y1y5°y5°y5y7y9y12y13y14                                   | 1638.81 | 60.029  | 123902 | 3 | 546.94  | -8.49  |
| O95810 SDPR_HUMAN Serum deprivation-response protein | 3  |                      | SDGDPVQPAVLQVHQTS                                | 408 | 17 | 5  | 16.47  | b2b5b11y10y17                                               | 1777.88 | 53.749  | 25714  | 2 | 889.44  | 2.88   |
| O95810 SDPR_HUMAN Serum deprivation-response protein | 4  |                      | VSPLTFGR                                         | 291 | 8  | 5  | 49.63  | b3y4y5y6y8                                                  | 876.48  | 55.811  | 24132  | 2 | 438.74  | -14.14 |
| O95810 SDPR_HUMAN Serum deprivation-response protein | 5  |                      | YQASTSNTVSK                                      | 102 | 11 | 13 | 87.71  | b1b2°b2b3y2y3y4y6y7y8y9°y9y11                               | 1185.57 | 19.753  | 15780  | 2 | 593.29  | -0.62  |
| O95810 SDPR_HUMAN Serum deprivation-response protein | 6  |                      | SSPFK                                            | 286 | 5  | 1  | 13.3   | b4                                                          | 565.30  | 51.000  | 17900  | 1 | 565.30  | -2.16  |
| O95810 SDPR_HUMAN Serum deprivation-response protein | 7  |                      | YEGSYALTSEEAEER                                  | 394 | 14 | 4  | 19.46  | b7y4°y4y8                                                   | 1604.72 | 45.570  | 9931   | 2 | 802.86  | 8.06   |
| O95810 SDPR_HUMAN Serum deprivation-response protein | 8  |                      | GSNSGMDSNIDLTIVEDEEEESVA<br>LEQAQK               | 362 | 30 | 4  | 11.44  | b3°b3y13y16                                                 | 3237.52 | 77.430  | 3856   | 5 | 648.31  | 18.70  |
| O95810 SDPR_HUMAN Serum deprivation-response protein | 9  |                      | EGESHAENETK                                      | 303 | 11 | 13 | 84.7   | b5°b5b6°b6b7b8y8°y8y9°y9°y9y10°y10                          | 1230.51 | 25.956  | 3373   | 2 | 615.76  | -10.02 |
| O95810 SDPR_HUMAN Serum deprivation-response protein | 10 |                      | QEKPSSPSPMPSSTPSPSLNLGNT<br>EAIRDNSQVNAVTVLTLDDK | 19  | 45 | 6  | 16.52  | b10°b10b12°b12b14°b14                                       | 4749.41 | 96.287  | 38862  | 4 | 1188.11 | 4.01   |

|                                                       |    |                       |                                               |     |    |    |       |                                            |         |         |        |   |         |        |
|-------------------------------------------------------|----|-----------------------|-----------------------------------------------|-----|----|----|-------|--------------------------------------------|---------|---------|--------|---|---------|--------|
| [O95810]SDPR_HUMAN Serum deprivation-response protein | 11 |                       | VLIFQEENEIPASVFKQPVSGAVE GK                   | 156 | 27 | 5  | 15.5  | b9*b9b13y3y6                               | 2914.56 | 84.297  | 18948  | 3 | 972.19  | 1.01   |
| [O95810]SDPR_HUMAN Serum deprivation-response protein | 12 |                       | QISLEGSVKGIQNDLTK                             | 82  | 17 | 3  | 23.46 | b3b4y5                                     | 1829.97 | 38.703  | 10529  | 3 | 610.66  | -12.41 |
| [O95810]SDPR_HUMAN Serum deprivation-response protein | 13 |                       | VRYEGSYALTSEEAEER                             | 392 | 16 | 4  | 37.62 | b12y12y13y14                               | 1859.87 | 48.006  | 3911   | 2 | 930.44  | -1.90  |
| [O95810]SDPR_HUMAN Serum deprivation-response protein | 14 |                       | GEDAAQAEKQHPGSDMR                             | 1   | 18 | 3  | 22.89 | y3y9y12                                    | 1973.87 | 109.868 | 1996   | 3 | 658.63  | -5.01  |
| [O95810]SDPR_HUMAN Serum deprivation-response protein | 15 |                       | NMLDAVQENQHK                                  | 66  | 12 | 2  | 15.7  | b3b5                                       | 1426.68 | 60.031  | 8937   | 2 | 713.85  | 7.44   |
| [P00338]LDHA_HUMAN L-lactate dehydrogenase A chain    | 1  | Carbamidomethyl+C(6)  | VIGSGCNLDSAR                                  | 157 | 12 | 11 | 95.89 | b2y1y3y4y5y6y8y9 <sup>o</sup> y9y10y12     | 1248.60 | 36.371  | 72187  | 2 | 624.80  | 0.29   |
| [P00338]LDHA_HUMAN L-lactate dehydrogenase A chain    | 2  |                       | LLIVSNPVDILTYVAWK                             | 132 | 17 | 5  | 26.39 | b3y4y11y13y17                              | 1944.13 | 116.254 | 27245  | 2 | 972.57  | 4.33   |
| [P00338]LDHA_HUMAN L-lactate dehydrogenase A chain    | 3  |                       | IVSGKDYNTVANSK                                | 76  | 14 | 7  | 39.38 | b4 <sup>b</sup> b4b8*b8y3y8y9              | 1495.76 | 30.609  | 16819  | 3 | 499.26  | -12.08 |
| [P00338]LDHA_HUMAN L-lactate dehydrogenase A chain    | 4  |                       | QVVESAYEVIK                                   | 232 | 11 | 8  | 64.41 | b4b8b9b10y2y7 <sup>o</sup> y7y9            | 1264.69 | 98.706  | 5462   | 3 | 422.24  | 12.16  |
| [P00338]LDHA_HUMAN L-lactate dehydrogenase A chain    | 5  |                       | LNLVQR                                        | 106 | 6  | 1  | 13.7  | y4                                         | 742.45  | 39.266  | 20363  | 2 | 371.73  | -11.67 |
| [P00338]LDHA_HUMAN L-lactate dehydrogenase A chain    | 6  |                       | SADTLWGIQK                                    | 318 | 10 | 3  | 28.88 | b8b9y9                                     | 1118.58 | 60.550  | 15890  | 2 | 559.79  | -5.57  |
| [P00338]LDHA_HUMAN L-lactate dehydrogenase A chain    | 7  |                       | VTLTSEEER                                     | 305 | 10 | 5  | 41.39 | b5b7y4y5 <sup>o</sup> y5                   | 1134.54 | 22.890  | 2784   | 2 | 567.77  | -20.98 |
| [P00338]LDHA_HUMAN L-lactate dehydrogenase A chain    | 8  |                       | NVNIFK                                        | 112 | 6  | 1  | 13.7  | y4                                         | 734.42  | 36.263  | 1849   | 2 | 367.72  | 4.57   |
| [P00338]LDHA_HUMAN L-lactate dehydrogenase A chain    | 9  |                       | LKGYTSWAIGLSVADLAESIMK                        | 243 | 22 | 5  | 38.35 | b6y5y7y8y9                                 | 2353.23 | 79.197  | 27399  | 3 | 785.08  | -6.22  |
| [P00338]LDHA_HUMAN L-lactate dehydrogenase A chain    | 10 | Carbamidomethyl+C(15) | GLYGIKDDVFLSVPCILQGNGISDL VK                  | 278 | 27 | 3  | 11.99 | b10b12y14                                  | 2920.56 | 105.338 | 12799  | 3 | 974.19  | 3.34   |
| [P00338]LDHA_HUMAN L-lactate dehydrogenase A chain    | 11 | Carbamidomethyl+C(8)  | NRVIGSGCNLDSAR                                | 155 | 14 | 4  | 27.25 | b8b9b13*b13                                | 1518.75 | 90.934  | 8331   | 2 | 759.88  | 2.65   |
| [P00338]LDHA_HUMAN L-lactate dehydrogenase A chain    | 12 | Phosphoryl STY(2)     | VTLTSEEER                                     | 305 | 10 | 4  | 27.12 | b3 <sup>b</sup> b3b5y7                     | 1214.52 | 25.980  | 6905   | 2 | 607.76  | 1.71   |
| [P00338]LDHA_HUMAN L-lactate dehydrogenase A chain    | 13 | Phosphoryl STY(8)     | TLHPDLGTDKDKQWKEVHK                           | 212 | 20 | 5  | 14.51 | b15_HPO3<br>b15y11 <sup>o</sup> y11y14*y14 | 2484.22 | 136.831 | 1550   | 2 | 1242.61 | 14.55  |
| [P00338]LDHA_HUMAN L-lactate dehydrogenase A chain    | 14 |                       | DYNTVANSK                                     | 81  | 9  | 1  | 7.33  | b4                                         | 1011.47 | 30.614  | 100067 | 2 | 506.24  | -7.78  |
| [P00338]LDHA_HUMAN L-lactate dehydrogenase A chain    | 15 |                       | YNTVANSK                                      | 82  | 8  | 0  | 3.57  |                                            | 896.44  | 30.602  | 10538  | 2 | 448.72  | -6.47  |
| [P00488]F13A_HUMAN Coagulation factor XIII A chain    | 1  |                       | GTYIPVPIVSELQSGK                              | 114 | 16 | 9  | 66.02 | b3 <sup>b</sup> b3b4y3y7y8y10y12y16        | 1687.94 | 84.688  | 116900 | 2 | 844.47  | 5.79   |
| [P00488]F13A_HUMAN Coagulation factor XIII A chain    | 2  |                       | LIASMSSDSL                                    | 705 | 11 | 10 | 67.42 | b2b3b9y1y3y6y7 <sup>o</sup> y7y9y11        | 1179.60 | 50.820  | 98519  | 2 | 590.30  | -2.90  |
| [P00488]F13A_HUMAN Coagulation factor XIII A chain    | 3  |                       | STVLTIPEIIK                                   | 624 | 12 | 11 | 94.42 | b2 <sup>b</sup> b2b4b6y4y6y7y8y9y10y12     | 1326.83 | 89.383  | 83846  | 2 | 663.92  | 1.84   |
| [P00488]F13A_HUMAN Coagulation factor XIII A chain    | 4  |                       | AVPPNNSNAEEDDLPTVELQGVV PR                    | 13  | 25 | 8  | 32.32 | b3b6b13b14 <sup>b</sup> b14y3y5y25         | 2602.30 | 75.515  | 72140  | 3 | 868.11  | -3.19  |
| [P00488]F13A_HUMAN Coagulation factor XIII A chain    | 5  |                       | MYVAVWTPYGVLR                                 | 159 | 13 | 7  | 39.57 | b2b3b4b5y1y7y13                            | 1554.82 | 91.584  | 45227  | 2 | 777.91  | 4.87   |
| [P00488]F13A_HUMAN Coagulation factor XIII A chain    | 6  |                       | GQSFYVQIDFSRPYDPRR                            | 79  | 18 | 5  | 15.73 | b3b14y1y10y18                              | 2231.10 | 94.484  | 41031  | 2 | 1116.06 | 2.41   |
| [P00488]F13A_HUMAN Coagulation factor XIII A chain    | 7  | Carbamidomethyl+C(8)  | DSVWNYHCWNEAWMTRPDLPV GFGGWQAVDSTPQENS DGM YR | 367 | 42 | 7  | 19.84 | b19b21y2y4y10y13y15                        | 4959.16 | 97.823  | 36520  | 4 | 1240.54 | 2.86   |
| [P00488]F13A_HUMAN Coagulation factor XIII A chain    | 8  |                       | LSIQSSPK                                      | 144 | 8  | 5  | 57.41 | y3y4y6y7y8                                 | 859.48  | 31.741  | 31702  | 2 | 430.24  | -7.24  |

|                                                    |    |                       |                                     |     |    |    |       |                                |         |         |        |   |         |        |
|----------------------------------------------------|----|-----------------------|-------------------------------------|-----|----|----|-------|--------------------------------|---------|---------|--------|---|---------|--------|
| [P00488]F13A_HUMAN Coagulation factor XIII A chain | 9  |                       | DGTHVVENVVDATHIGK                   | 447 | 16 | 5  | 28.59 | b4b5b8y3y16                    | 1691.82 | 40.864  | 23496  | 3 | 564.61  | -7.94  |
| [P00488]F13A_HUMAN Coagulation factor XIII A chain | 10 |                       | VEYVIGR                             | 101 | 7  | 3  | 40.7  | y3y5y6                         | 835.46  | 43.284  | 20237  | 2 | 418.24  | -4.68  |
| [P00488]F13A_HUMAN Coagulation factor XIII A chain | 11 |                       | VGSAMVNAK                           | 261 | 9  | 7  | 53.55 | b2b7y2y4y6y8y9                 | 876.46  | 25.901  | 15990  | 2 | 438.73  | -4.74  |
| [P00488]F13A_HUMAN Coagulation factor XIII A chain | 12 |                       | SNVDMDFEVENAVLGK                    | 516 | 16 | 5  | 23.86 | b2b15*b15y12y13                | 1766.81 | 69.784  | 8161   | 2 | 883.91  | -8.71  |
| [P00488]F13A_HUMAN Coagulation factor XIII A chain | 13 |                       | GQSFYVQIDFSRPYDPR                   | 79  | 17 | 5  | 23.46 | b11b12*b12y8*y8                | 2075.01 | 65.984  | 2264   | 3 | 692.34  | 6.94   |
| [P00488]F13A_HUMAN Coagulation factor XIII A chain | 14 |                       | QIGGDGMMDITDTYK                     | 468 | 15 | 4  | 38.15 | b6y4y5y6                       | 1644.72 | 91.723  | 1942   | 2 | 822.87  | 0.07   |
| [P00488]F13A_HUMAN Coagulation factor XIII A chain | 15 | Carbamidomethyl+C(1)  | CGPASVQAIK                          | 409 | 10 | 3  | 28.88 | b3y7y8                         | 1030.53 | 35.493  | 37905  | 2 | 515.77  | -1.54  |
| [P00488]F13A_HUMAN Coagulation factor XIII A chain | 16 | Carbamidomethyl+C(4)  | YGQCWVFAGVFNFLR                     | 311 | 16 | 7  | 53.55 | b8y3y5y6y8y9*y9                | 1964.96 | 114.941 | 12516  | 2 | 982.98  | 6.03   |
| [P00488]F13A_HUMAN Coagulation factor XIII A chain | 17 | Carbamidomethyl+C(14) | EIRPNSTVQWEEVCRPWVSGHR              | 682 | 22 | 3  | 22.31 | b11y4y5                        | 2722.34 | 61.491  | 9086   | 3 | 908.12  | 4.13   |
| [P00488]F13A_HUMAN Coagulation factor XIII A chain | 18 | Carbamidomethyl+C(14) | NPETDTYILFNPWCEDDAVYLDN EK          | 175 | 25 | 4  | 22.99 | y5y6*y6y24                     | 3061.37 | 98.673  | 4426   | 3 | 1021.13 | 8.29   |
| [P00488]F13A_HUMAN Coagulation factor XIII A chain | 19 |                       | EEYVLNDIGVIFYGEVNDIK                | 202 | 20 | 7  | 42.51 | b12y11y12y16*y16y17*y17        | 2329.12 | 136.804 | 1644   | 2 | 1165.06 | -18.45 |
| [P00488]F13A_HUMAN Coagulation factor XIII A chain | 20 |                       | SRSNVDMDFEVENAVLGK                  | 514 | 18 | 3  | 22.89 | b3b11b14                       | 2009.95 | 52.751  | 9355   | 2 | 1005.48 | -4.13  |
| [P00488]F13A_HUMAN Coagulation factor XIII A chain | 21 |                       | GNPIKVSR                            | 253 | 8  | 6  | 62.93 | b4*b4y3y4y5y6                  | 870.51  | 24.967  | 7357   | 2 | 435.76  | -2.03  |
| [P00488]F13A_HUMAN Coagulation factor XIII A chain | 22 | Carbamidomethyl+C(14) | NPETDTYILFNPWCEDDAVYLDN EKER        | 175 | 27 | 3  | 11.99 | b4b12y5                        | 3346.52 | 90.269  | 6078   | 3 | 1116.18 | 10.29  |
| [P00488]F13A_HUMAN Coagulation factor XIII A chain | 23 |                       | LIVTKQIGGDGMMDITDTYK                | 463 | 20 | 3  | 23.93 | y3y7y8                         | 2199.09 | 105.305 | 3680   | 3 | 733.70  | -7.22  |
| [P00488]F13A_HUMAN Coagulation factor XIII A chain | 24 | Phosphoryl STY(7)     | MYVAVWTPYGVLR                       | 159 | 13 | 3  | 20.83 | b5b11y8                        | 1634.78 | 58.568  | 42179  | 3 | 545.60  | 4.33   |
| [P00488]F13A_HUMAN Coagulation factor XIII A chain | 25 | Phosphoryl STY(11)    | GQSFYVQIDFSRPYDPRR                  | 79  | 18 | 3  | 15.73 | b8b10y8                        | 2311.04 | 136.237 | 2283   | 2 | 1156.02 | -7.92  |
| [P00924]ENO1_YEAST Enolase 1                       | 1  |                       | NVNDVIAPAFVK                        | 67  | 12 | 12 | 81.12 | b1*b1b2b4b5*b5b6y5y6y9y10y12   | 1286.70 | 65.995  | 133175 | 2 | 643.85  | -6.26  |
| [P00924]ENO1_YEAST Enolase 1                       | 2  |                       | SIVPSGASTGVHEALEMR                  | 32  | 18 | 12 | 77.44 | b1b7b13b17y1y5y6y9*y9y11y12y13 | 1840.90 | 61.284  | 103992 | 3 | 614.31  | -10.15 |
| [P00924]ENO1_YEAST Enolase 1                       | 3  |                       | IGSEVYHNLK                          | 185 | 10 | 5  | 52.18 | y3y4y5y9y10                    | 1159.61 | 37.704  | 94973  | 2 | 580.31  | -0.74  |
| [P00924]ENO1_YEAST Enolase 1                       | 4  |                       | VNQIGTLESSEIK                       | 346 | 12 | 7  | 69.29 | b2y3y5y8y9y11y12               | 1288.71 | 54.525  | 83648  | 2 | 644.86  | -4.17  |
| [P00924]ENO1_YEAST Enolase 1                       | 5  |                       | IEEELGDNAVAFAGENFHHGDK              | 415 | 21 | 3  | 14    | b10y8y11                       | 2328.04 | 57.663  | 47142  | 4 | 582.76  | -7.03  |
| [P00924]ENO1_YEAST Enolase 1                       | 6  |                       | IATAIEK                             | 330 | 7  | 6  | 50.99 | b4*b4y4y5y6y7                  | 745.44  | 28.016  | 16143  | 2 | 373.22  | -13.35 |
| [P00924]ENO1_YEAST Enolase 1                       | 7  |                       | SGETEDTFIADLVVGLR                   | 375 | 17 | 3  | 16.47 | b9b16y13                       | 1821.90 | 87.094  | 3224   | 3 | 607.97  | -13.53 |
| [P00924]ENO1_YEAST Enolase 1                       | 8  |                       | AADALLLK                            | 338 | 8  | 6  | 81    | b3b5b6y4y6y7                   | 814.49  | 53.160  | 123221 | 2 | 407.75  | -17.09 |
| [P00924]ENO1_YEAST Enolase 1                       | 9  |                       | TFAEALR                             | 178 | 7  | 4  | 40.7  | y4*y4y5y6                      | 807.43  | 45.490  | 71444  | 2 | 404.22  | -10.51 |
| [P00924]ENO1_YEAST Enolase 1                       | 10 |                       | LNQLLR                              | 409 | 6  | 3  | 40.3  | b3y4y5                         | 756.46  | 42.158  | 43540  | 2 | 378.74  | -12.26 |
| [P00924]ENO1_YEAST Enolase 1                       | 11 |                       | AAQDSFAAGWGVMSHR                    | 358 | 17 | 4  | 26.39 | b10b12b15y16                   | 1789.81 | 71.208  | 12428  | 3 | 597.28  | -17.19 |
| [P00924]ENO1_YEAST Enolase 1                       | 12 |                       | AVDDFLISLDGTANK                     | 88  | 15 | 3  | 24.33 | b3b4y8                         | 1578.82 | 90.376  | 3833   | 2 | 789.91  | 9.43   |
| [P00924]ENO1_YEAST Enolase 1                       | 13 |                       | RYGASAGNVGDEGGVAPNIQTAE EALDLIVDAIK | 200 | 34 | 6  | 21.63 | b5b8b9*b9*y32                  | 3413.76 | 126.804 | 98987  | 3 | 1138.59 | 11.16  |
| [P00924]ENO1_YEAST Enolase 1                       | 14 |                       | IEEELGDNAVAFAGENFHHGDKL             | 415 | 22 | 9  | 46.26 | b4b12b13*b13b15y9*y9y10y12     | 2441.12 | 63.782  | 55648  | 4 | 611.04  | -7.10  |
| [P00924]ENO1_YEAST Enolase 1                       | 15 |                       | GNPTVEVELTTEKGVFR                   | 15  | 17 | 7  | 39.4  | b3*b3b5b6*b6b7*b7              | 1875.97 | 44.459  | 17156  | 3 | 625.99  | -8.59  |
| [P00924]ENO1_YEAST Enolase 1                       | 16 |                       | DQKAVDDFLISLDGTANK                  | 85  | 18 | 4  | 26.81 | b14y5y6y14                     | 1950.00 | 80.628  | 2990   | 3 | 650.67  | 11.64  |
| [P00924]ENO1_YEAST Enolase 1                       | 17 |                       | SIVPSGASTGVHEALEMRDGDGK             | 32  | 22 | 3  | 13.56 | b13y4y9                        | 2256.12 | 80.102  | 2577   | 3 | 752.71  | 12.23  |
| [P00924]ENO1_YEAST Enolase 1                       | 18 | Phosphoryl STY(8)     | AVDDFLISLDGTANK                     | 88  | 15 | 4  | 18.31 | b9*b9y6y11                     | 1658.74 | 46.410  | 2166   | 2 | 829.87  | -12.36 |
| [P00924]ENO1_YEAST Enolase 1                       | 19 | Oxidation+M(13)       | AAQDSFAAGWGVMSHR                    | 358 | 17 | 3  | 16.47 | b4y3y10                        | 1805.85 | 58.608  | 4011   | 2 | 903.43  | 6.90   |
| [P00924]ENO1_YEAST Enolase 1                       | 20 |                       | SGASTGVHEALEMR                      | 36  | 14 | 0  | 5.16  |                                | 1444.67 | 61.239  | 13286  | 3 | 482.23  | -11.32 |



|                                             |    |                       |                                |     |    |    |        |                                                       |         |         |         |   |         |        |
|---------------------------------------------|----|-----------------------|--------------------------------|-----|----|----|--------|-------------------------------------------------------|---------|---------|---------|---|---------|--------|
| P02042 HBD_HUMAN Hemoglobin subunit delta   | 1  |                       | LLVVYPWTQR                     | 31  | 10 | 20 | 130.23 | b2b3b4b5y1y2*y2y3y3*y3y4y5°y5*y5y6°y6y7y8y9y10        | 1274.73 | 79.172  | 1361804 | 2 | 637.87  | -0.29  |
| P02042 HBD_HUMAN Hemoglobin subunit delta   | 2  |                       | VLGAFSDGLAHLNDLNK              | 67  | 16 | 18 | 153.58 | b2b3y1y2y3y4°y4y5y6y7y9y10y11y12°y12y13y14y16         | 1669.87 | 77.106  | 1101162 | 3 | 557.30  | -10.23 |
| P02042 HBD_HUMAN Hemoglobin subunit delta   | 3  |                       | VVAGVANALAHK                   | 133 | 12 | 16 | 127.35 | b2b5y2y3y4y5y6*y6y7*y7y8y9*y9y10y11y12                | 1149.67 | 42.842  | 341590  | 2 | 575.34  | -3.08  |
| P02042 HBD_HUMAN Hemoglobin subunit delta   | 4  | Carbamidomethyl+C(11) | GTFSQLSELHCDK                  | 83  | 13 | 7  | 34.71  | b5b11y2y4y5y13*y13                                    | 1521.71 | 66.061  | 195044  | 2 | 761.36  | 3.85   |
| P02042 HBD_HUMAN Hemoglobin subunit delta   | 5  |                       | VHLTPEEK                       | 1   | 8  | 6  | 49.63  | b2b3y4y5y6y8                                          | 952.50  | 26.602  | 110160  | 2 | 476.76  | -5.38  |
| P02042 HBD_HUMAN Hemoglobin subunit delta   | 6  |                       | LHVDPENFR                      | 96  | 9  | 12 | 91.69  | b2b3b4b6y2y3*y3y4°y4y5y7y9                            | 1126.56 | 47.804  | 106928  | 2 | 563.78  | -3.47  |
| P02042 HBD_HUMAN Hemoglobin subunit delta   | 7  |                       | VNVDAVGEALGR                   | 18  | 13 | 5  | 32.58  | b5y6y7°y7y11                                          | 1256.66 | 50.702  | 28836   | 2 | 628.83  | -2.43  |
| P02042 HBD_HUMAN Hemoglobin subunit delta   | 8  |                       | FFESFGDLSSPDAMGNPK             | 41  | 19 | 6  | 33.66  | b16y10*y10y12y15y16                                   | 2044.96 | 81.806  | 22389   | 2 | 1022.98 | 14.68  |
| P02042 HBD_HUMAN Hemoglobin subunit delta   | 9  |                       | EFTPQMQAAYQK                   | 121 | 12 | 3  | 22.47  | b10y5y9                                               | 1441.68 | 48.083  | 17924   | 2 | 721.35  | 3.56   |
| P02042 HBD_HUMAN Hemoglobin subunit delta   | 10 | Carbamidomethyl+C(27) | VLGAFSDGLAHLNDLNKGTFSQLSELHCDK | 67  | 29 | 12 | 94.2   | b3b4b9b11°b11b12y3y4y5y6y7°y7                         | 3172.55 | 112.287 | 125186  | 4 | 793.89  | -8.62  |
| P02042 HBD_HUMAN Hemoglobin subunit delta   | 11 |                       | VVAGVANALAHKYH                 | 133 | 14 | 11 | 124.55 | b3b4y3y4y5y6y7y9*y9y11y12                             | 1449.80 | 46.418  | 79984   | 2 | 725.40  | 0.17   |
| P02042 HBD_HUMAN Hemoglobin subunit delta   | 12 |                       | EFTPQMQAAYQKVAGVANALAHK        | 121 | 24 | 4  | 28.15  | b3b10b12b15                                           | 2572.32 | 84.366  | 9548    | 3 | 858.11  | -6.74  |
| P02042 HBD_HUMAN Hemoglobin subunit delta   | 13 | Phosphoryl STY(7)     | NFGKEFTPQMQAAYQK               | 117 | 16 | 4  | 23.86  | b5°b5b6y13                                            | 1967.88 | 72.869  | 23785   | 2 | 984.44  | 7.32   |
| P02100 HBE_HUMAN Hemoglobin subunit epsilon | 1  |                       | LLVVYPWTQR                     | 31  | 10 | 20 | 130.23 | b2b3b4b5y1y2*y2y3y3*y3y4y5°y5*y5y6°y6y7y8y9y10        | 1274.73 | 79.172  | 1361804 | 2 | 637.87  | -0.29  |
| P02100 HBE_HUMAN Hemoglobin subunit epsilon | 2  |                       | MVHFTAEEK                      | 0   | 9  | 5  | 30.7   | b2b6b7y5y9                                            | 1091.53 | 121.039 | 2032    | 1 | 1091.53 | 13.98  |
| P02100 HBE_HUMAN Hemoglobin subunit epsilon | 3  |                       | AAVTSLSWKMNVEEAGGEALGR         | 9   | 22 | 6  | 24.43  | b8°b8y9y10y13*y13                                     | 2276.10 | 108.673 | 3558    | 3 | 759.37  | -13.19 |
| P02100 HBE_HUMAN Hemoglobin subunit epsilon | 4  | Carbamidomethyl+C(17) | NMDNLKPAFAKLSELHCDK            | 77  | 19 | 3  | 15.08  | b5y5y13                                               | 2231.11 | 69.851  | 1715    | 4 | 558.53  | 5.47   |
| P02671 FIBA_HUMAN Fibrinogen alpha chain    | 1  |                       | GLIDEVNDQFTNR                  | 71  | 13 | 11 | 97.55  | b5y2y3*y3y4y5y7y8y9y10y13                             | 1520.74 | 69.904  | 166679  | 2 | 760.87  | 3.77   |
| P02671 FIBA_HUMAN Fibrinogen alpha chain    | 2  |                       | NSLFEYQK                       | 89  | 8  | 7  | 41.1   | b2y1y4*y4y5y6y8                                       | 1028.50 | 51.098  | 79905   | 2 | 514.75  | -6.29  |
| P02671 FIBA_HUMAN Fibrinogen alpha chain    | 3  |                       | TFPGFFSPMLGEFVSETESR           | 527 | 20 | 20 | 124.45 | b2b3b11b13b14y1y4y5°y5y6°y6y7°y7y8y10y13y14°y14y18y20 | 2265.07 | 109.879 | 51522   | 2 | 1133.04 | 7.22   |
| P02671 FIBA_HUMAN Fibrinogen alpha chain    | 4  | Carbamidomethyl+C(7)  | DSDWPFCSEDEWNYK                | 48  | 15 | 4  | 15.01  | y4*y4y11y15                                           | 1963.77 | 81.570  | 42285   | 2 | 982.39  | 14.55  |
| P02671 FIBA_HUMAN Fibrinogen alpha chain    | 5  |                       | EVDLKDYEDQQK                   | 190 | 12 | 10 | 44.52  | b3b10y1y2*y2y4y7°y7y8y12                              | 1509.71 | 41.326  | 41913   | 2 | 755.36  | 2.99   |
| P02671 FIBA_HUMAN Fibrinogen alpha chain    | 6  |                       | ESSSHHPGIAEFPSR                | 558 | 15 | 9  | 55     | b6°b6b11b15y3y4y8y9y15                                | 1637.75 | 39.501  | 41227   | 3 | 546.59  | -8.65  |
| P02671 FIBA_HUMAN Fibrinogen alpha chain    | 7  |                       | TVIGPDGHKEVTK                  | 467 | 13 | 11 | 75.21  | b2°b2y1y2y3y4°y4y7y8y9y10                             | 1380.74 | 24.964  | 32345   | 3 | 460.92  | -7.87  |
| P02671 FIBA_HUMAN Fibrinogen alpha chain    | 8  | Carbamidomethyl+C(11) | EVVTSSEDCPEAMDGLTSLGIGTLDGFR   | 480 | 30 | 12 | 80.8   | b4y2y3y4y6y7°y7y9y10y12y13y30                         | 3128.44 | 91.883  | 28308   | 2 | 1564.72 | 10.54  |
| P02671 FIBA_HUMAN Fibrinogen alpha chain    | 9  |                       | GDFSSANNRDNTYNR                | 114 | 15 | 9  | 26.39  | y2y3*y3y4y5°y5*y12°y12y15                             | 1730.74 | 26.846  | 24368   | 3 | 577.58  | -5.64  |

|                                           |    |                                       |                                            |     |    |    |       |                               |         |         |        |   |         |        |
|-------------------------------------------|----|---------------------------------------|--------------------------------------------|-----|----|----|-------|-------------------------------|---------|---------|--------|---|---------|--------|
| [P02671 FIBA_HUMAN Fibrinogen alpha chain | 10 |                                       | MADEAGSEADHEGTHSTK                         | 602 | 18 | 11 | 74.2  | b2b3y2y3y6y7y8y13y14y16y18    | 1872.74 | 17.264  | 20717  | 4 | 468.94  | -12.19 |
| [P02671 FIBA_HUMAN Fibrinogen alpha chain | 11 |                                       | GGSTSYGTGSETESPR                           | 271 | 16 | 4  | 25.03 | y8y10y12y16                   | 1572.68 | 26.136  | 16082  | 2 | 786.84  | 1.47   |
| [P02671 FIBA_HUMAN Fibrinogen alpha chain | 12 |                                       | GSESGIFTNTKESSSHHPGIAEFPSR                 | 547 | 26 | 6  | 25.74 | b18b19*b19y13*y13y23          | 2759.32 | 136.812 | 10732  | 2 | 1380.16 | 6.37   |
| [P02671 FIBA_HUMAN Fibrinogen alpha chain | 13 |                                       | QFTSSTSYNR                                 | 581 | 10 | 4  | 28.88 | b7y7y8y10                     | 1190.54 | 29.898  | 5621   | 2 | 595.78  | 0.62   |
| [P02671 FIBA_HUMAN Fibrinogen alpha chain | 14 |                                       | MADEAGSEADHEGTHSTKR                        | 602 | 19 | 6  | 40.19 | b3y2y4y7y8y9                  | 2028.87 | 16.188  | 3348   | 3 | 676.96  | 0.18   |
| [P02671 FIBA_HUMAN Fibrinogen alpha chain | 15 |                                       | MELERPGGNEITR                              | 258 | 13 | 4  | 20.83 | b4y8*y8y12                    | 1501.73 | 42.468  | 170101 | 3 | 501.25  | -7.64  |
| [P02671 FIBA_HUMAN Fibrinogen alpha chain | 16 |                                       | IEVLK                                      | 137 | 5  | 2  | 26.6  | b3b4                          | 601.39  | 61.714  | 43749  | 1 | 601.39  | 3.55   |
| [P02671 FIBA_HUMAN Fibrinogen alpha chain | 17 | Carbamidomethyl+C(6)                  | IFSVMYCDQETSLGGWLLIQQR                     | 657 | 21 | 4  | 20.65 | b3*b3b6b11                    | 2513.27 | 104.219 | 34804  | 3 | 838.43  | 6.31   |
| [P02671 FIBA_HUMAN Fibrinogen alpha chain | 18 |                                       | HPDEAAFFDTASTGK                            | 512 | 15 | 4  | 18.31 | b6b14y12*y12                  | 1593.73 | 52.801  | 21449  | 2 | 797.37  | 8.58   |
| [P02671 FIBA_HUMAN Fibrinogen alpha chain | 19 |                                       | TWQDYK                                     | 687 | 6  | 1  | 13.7  | y4                            | 840.39  | 87.962  | 2447   | 1 | 840.39  | 2.91   |
| [P02671 FIBA_HUMAN Fibrinogen alpha chain | 20 |                                       | NPSSAGSWNSGSSGPGSTGNR                      | 287 | 21 | 5  | 30.05 | b4b5b8y6y11                   | 1963.84 | 102.651 | 2255   | 4 | 491.72  | -4.29  |
| [P02671 FIBA_HUMAN Fibrinogen alpha chain | 21 |                                       | VTSGSTTTTR                                 | 448 | 10 | 5  | 27.12 | b6*b6y5y7*y7                  | 1010.51 | 27.999  | 2190   | 2 | 505.76  | -6.22  |
| [P02671 FIBA_HUMAN Fibrinogen alpha chain | 22 |                                       | VTSGSTTTTRR                                | 448 | 11 | 3  | 24.51 | b7b10y9                       | 1166.60 | 55.633  | 126768 | 2 | 583.80  | -10.05 |
| [P02671 FIBA_HUMAN Fibrinogen alpha chain | 23 |                                       | QFTSSTSYNRGDSTFESK                         | 581 | 18 | 3  | 23.13 | b4b5y6                        | 2041.94 | 54.935  | 92100  | 3 | 681.32  | 13.99  |
| [P02671 FIBA_HUMAN Fibrinogen alpha chain | 24 |                                       | MELERPGGNEITRGGSTSYGTGSETESPR              | 258 | 29 | 10 | 43.92 | b8b10*b10b11b14*b14y7y9y12y13 | 3055.40 | 118.888 | 78573  | 4 | 764.61  | 0.56   |
| [P02671 FIBA_HUMAN Fibrinogen alpha chain | 25 |                                       | HRHPDEAAFFDTASTGK                          | 510 | 17 | 4  | 30.15 | b4b10y12y13                   | 1886.88 | 84.606  | 40407  | 3 | 629.63  | -0.45  |
| [P02671 FIBA_HUMAN Fibrinogen alpha chain | 26 |                                       | GSESGIFTNTKESSSHHPGIAEFPSR                 | 547 | 26 | 4  | 12.23 | b9y5*y5y8                     | 2759.26 | 105.747 | 22811  | 3 | 920.43  | -14.69 |
| [P02671 FIBA_HUMAN Fibrinogen alpha chain | 27 |                                       | NNSPYEIENGVVVWSFRGADYSLR                   | 830 | 24 | 3  | 12.81 | b12y9y12                      | 2772.33 | 118.938 | 19265  | 3 | 924.78  | -3.79  |
| [P02671 FIBA_HUMAN Fibrinogen alpha chain | 28 |                                       | ALTDMPQMRMELERPGGNEITR                     | 249 | 22 | 6  | 13.56 | b5b12*b12y7*y7*y7             | 2545.23 | 104.280 | 16343  | 3 | 849.08  | -1.63  |
| [P02671 FIBA_HUMAN Fibrinogen alpha chain | 29 |                                       | GKSSSYSK                                   | 573 | 8  | 3  | 33.32 | b5y3y4                        | 843.42  | 48.593  | 16011  | 1 | 843.42  | -3.04  |
| [P02671 FIBA_HUMAN Fibrinogen alpha chain | 30 |                                       | HPDEAAFFDTASTGKTFPGFFSPMLGEFVSETESR        | 512 | 35 | 5  | 12.94 | b8b14y12*y12y17               | 3839.75 | 76.615  | 3213   | 4 | 960.69  | -1.91  |
| [P02671 FIBA_HUMAN Fibrinogen alpha chain | 31 |                                       | DSHSLTTNIMEILRGDFSSANNR                    | 100 | 23 | 5  | 26.71 | b10*b10b11y12y22              | 2578.25 | 76.549  | 2852   | 3 | 860.09  | 7.20   |
| [P02671 FIBA_HUMAN Fibrinogen alpha chain | 32 |                                       | VPPEWKALTDMPQMR                            | 243 | 15 | 6  | 36.97 | y3y8*y8y12*y12y13             | 1798.88 | 67.158  | 2534   | 3 | 600.30  | -7.60  |
| [P02671 FIBA_HUMAN Fibrinogen alpha chain | 33 | Carbamidomethyl+C(9)                  | VVERHQACK                                  | 38  | 10 | 4  | 39.63 | b3b9y5y9                      | 1213.61 | 110.903 | 1985   | 1 | 1213.61 | 0.30   |
| [P02671 FIBA_HUMAN Fibrinogen alpha chain | 34 | Carbamidomethyl+C(24);Oxidation+M(28) | TVIGPDGHKEVTKEVVTSEDGSDCPEAMDLGTLGIGTLDGFR | 467 | 43 | 4  | 25.36 | y3y4y10y14                    | 4506.19 | 68.525  | 33066  | 5 | 902.04  | 14.41  |
| [P02671 FIBA_HUMAN Fibrinogen alpha chain | 35 | Oxidation+M(6)                        | AQLVDMKR                                   | 160 | 8  | 3  | 33.32 | b3y3y4                        | 976.52  | 26.909  | 12042  | 2 | 488.76  | -7.00  |
| [P02671 FIBA_HUMAN Fibrinogen alpha chain | 36 | Oxidation+M(8)                        | ALTDMPQMR                                  | 249 | 9  | 4  | 30.7  | b4b7y4*y4                     | 1078.51 | 28.277  | 5972   | 2 | 539.76  | 11.21  |
| [P02671 FIBA_HUMAN Fibrinogen alpha chain | 37 | Oxidation+M(9)                        | TFPGFFSPMLGEFVSETESR                       | 527 | 20 | 3  | 14.51 | b3b9y9                        | 2281.07 | 136.244 | 1750   | 2 | 1141.04 | 8.24   |
| [P02671 FIBA_HUMAN Fibrinogen alpha chain | 38 | Oxidation+M(1)                        | MELERPGGNEITR                              | 258 | 13 | 4  | 25.6  | b6b7y10*y10                   | 1517.74 | 117.464 | 1748   | 2 | 759.37  | 2.01   |

|                                           |    |                                                                    |                                   |     |    |    |        |                                                       |         |         |        |   |         |        |
|-------------------------------------------|----|--------------------------------------------------------------------|-----------------------------------|-----|----|----|--------|-------------------------------------------------------|---------|---------|--------|---|---------|--------|
| [P02671 FIBA_HUMAN Fibrinogen alpha chain | 39 |                                                                    | IGPDGHKEVTK                       | 469 | 11 | 1  | 7.45   | b9                                                    | 1180.63 | 24.957  | 17101  | 2 | 590.82  | -1.65  |
| [P02671 FIBA_HUMAN Fibrinogen alpha chain | 40 |                                                                    | GPDGHKEVTK                        | 470 | 10 | 3  | 28.31  | b5b6b9                                                | 1067.55 | 24.960  | 8652   | 2 | 534.28  | -1.26  |
| [P02671 FIBA_HUMAN Fibrinogen alpha chain | 41 |                                                                    | IFTNTKESSSHHPGIAEPPSR             | 552 | 21 | 1  | 8.41   | b16                                                   | 2342.14 | 136.844 | 4259   | 2 | 1171.58 | -3.23  |
| [P02671 FIBA_HUMAN Fibrinogen alpha chain | 42 |                                                                    | EVDLKDYEDQQK                      | 190 | 12 | 3  | 17.62  | y8y10*y10                                             | 1491.69 | 41.371  | 9643   | 3 | 497.90  | -3.52  |
| [P02671 FIBA_HUMAN Fibrinogen alpha chain | 43 |                                                                    | NSLFEYQK                          | 89  | 8  | 1  | 9.72   | b4                                                    | 1011.49 | 51.066  | 1914   | 2 | 506.25  | 12.13  |
| [P02679 FIBG_HUMAN Fibrinogen gamma chain | 1  |                                                                    | AIQLTYNPDESSKPNMIDAATLK           | 88  | 23 | 20 | 154.21 | b1b2b3b4b5b14y2y3y4y10y13y14y16y17y18*y18y19y20y21y23 | 2520.26 | 66.894  | 293973 | 3 | 840.76  | -0.48  |
| [P02679 FIBG_HUMAN Fibrinogen gamma chain | 2  |                                                                    | EGFGHLSPTGTTEFWLGNEK              | 238 | 20 | 9  | 28.31  | b2b6°b6b14°b14y4y6y14y20                              | 2207.05 | 77.559  | 239717 | 3 | 736.36  | 4.87   |
| [P02679 FIBG_HUMAN Fibrinogen gamma chain | 3  |                                                                    | ASTPNGYDNGIHWATWK                 | 382 | 17 | 8  | 58.51  | b4b12b15y4y5y6y10y17                                  | 1893.93 | 81.475  | 206136 | 2 | 947.47  | 7.09   |
| [P02679 FIBG_HUMAN Fibrinogen gamma chain | 4  | Carbamidomethyl+C(8); Carbamidomethyl+C(12); Carbamidomethyl+C(26) | VAQLEAQCQEPCCKDTVQIHDITGKDCQDIANK | 153 | 32 | 13 | 65.78  | b3b5b16y2y4y5y8y10y11y14y22y29y32                     | 3712.69 | 50.539  | 203834 | 5 | 743.34  | -13.02 |
| [P02679 FIBG_HUMAN Fibrinogen gamma chain | 5  |                                                                    | VELEDWNGR                         | 273 | 9  | 5  | 57.81  | y4y5y7y8y9                                            | 1117.53 | 52.529  | 128082 | 2 | 559.27  | -0.66  |
| [P02679 FIBG_HUMAN Fibrinogen gamma chain | 6  | Carbamidomethyl+C(5); Carbamidomethyl+C(9)                         | FGSYCPTTCGIADFLSTYQTK             | 40  | 21 | 18 | 133.46 | b2b3b5b15y2y3*y3y4y5y6y7y8y9y10y13y16°y16y21          | 2417.10 | 89.096  | 121114 | 2 | 1209.05 | 8.79   |
| [P02679 FIBG_HUMAN Fibrinogen gamma chain | 7  | Carbamidomethyl+C(8); Carbamidomethyl+C(12)                        | VAQLEAQCQEPCCKDTVQIHDITGK         | 153 | 24 | 6  | 42.7   | y14y17y19y20y21y24                                    | 2768.31 | 51.284  | 111204 | 4 | 692.83  | -7.06  |
| [P02679 FIBG_HUMAN Fibrinogen gamma chain | 8  |                                                                    | TSTADYAMFK                        | 282 | 10 | 5  | 28.88  | b1b8y8y9y10                                           | 1134.51 | 53.469  | 94410  | 2 | 567.76  | -1.51  |
| [P02679 FIBG_HUMAN Fibrinogen gamma chain | 9  |                                                                    | IHLISTQSAIPYALR                   | 258 | 15 | 8  | 58.8   | b2b3b4y3y5y11y13y15                                   | 1682.94 | 70.998  | 86470  | 3 | 561.65  | -10.88 |
| [P02679 FIBG_HUMAN Fibrinogen gamma chain | 10 | Carbamidomethyl+C(3); Carbamidomethyl+C(4)                         | DNCCILDER                         | 31  | 9  | 9  | 75.38  | b3°b3y2y3y4y5y6y7y9                                   | 1194.49 | 45.186  | 82241  | 2 | 597.75  | 2.35   |
| [P02679 FIBG_HUMAN Fibrinogen gamma chain | 11 |                                                                    | YLQEIYNSNNQK                      | 134 | 12 | 12 | 82.88  | b2b3b4°b4b5y7y8y9y10*y10y12*y12                       | 1513.73 | 45.118  | 82024  | 2 | 757.37  | 1.37   |
| [P02679 FIBG_HUMAN Fibrinogen gamma chain | 12 |                                                                    | QVRPEHPAETEYDSLYPEDDL             | 432 | 21 | 8  | 31.48  | b2b5b9b10°b10b13y4°y4                                 | 2503.13 | 93.064  | 24532  | 4 | 626.54  | 1.07   |
| [P02679 FIBG_HUMAN Fibrinogen gamma chain | 13 |                                                                    | YEASILTHDSSIR                     | 121 | 13 | 5  | 28.31  | b5°b5b6b9b13                                          | 1491.74 | 53.149  | 15538  | 2 | 746.37  | -4.17  |
| [P02679 FIBG_HUMAN Fibrinogen gamma chain | 14 | Carbamidomethyl+C(1)                                               | CHAGHLNGVYYQGGTYSK                | 364 | 18 | 7  | 44     | b9y3°y3y4y7y8y18                                      | 2011.91 | 38.816  | 6151   | 3 | 671.31  | 2.55   |
| [P02679 FIBG_HUMAN Fibrinogen gamma chain | 15 |                                                                    | QSGLYFIKPLK                       | 188 | 11 | 7  | 52.87  | b3°b3b5°b5y3y4y5                                      | 1293.73 | 65.638  | 143577 | 3 | 431.92  | -18.12 |
| [P02679 FIBG_HUMAN Fibrinogen gamma chain | 16 | Carbamidomethyl+C(8); Carbamidomethyl+C(12)                        | VAQLEAQCQEPCCK                    | 153 | 13 | 4  | 20.83  | b11y3y5*y5                                            | 1560.73 | 91.736  | 89765  | 3 | 520.92  | 11.89  |
| [P02679 FIBG_HUMAN Fibrinogen gamma chain | 17 |                                                                    | DLQSLEDILHQVENK                   | 64  | 15 | 4  | 18.31  | b3°b3b9y12                                            | 1780.92 | 107.043 | 39475  | 2 | 890.96  | 4.18   |
| [P02679 FIBG_HUMAN Fibrinogen gamma chain | 18 | Carbamidomethyl+C(9)                                               | ANQQFLVYCEIDGSGNGWTVFQK           | 199 | 23 | 3  | 19.57  | y3y10y13                                              | 2661.26 | 88.409  | 26644  | 3 | 887.76  | 8.16   |
| [P02679 FIBG_HUMAN Fibrinogen gamma chain | 19 |                                                                    | NWIQYKEGFGHLSPTGTTEFWLGNEK        | 232 | 26 | 9  | 41.25  | b4b7b10b13y9°y9y12y13*y13                             | 3039.46 | 118.898 | 147494 | 3 | 1013.83 | 0.16   |
| [P02679 FIBG_HUMAN Fibrinogen gamma chain | 20 |                                                                    | VGPEADKYR                         | 292 | 9  | 11 | 88.68  | b8y3y4°y4y5°y5y6°y6y7°y7y8                            | 1034.53 | 24.067  | 36437  | 2 | 517.77  | 4.13   |

|                                           |    |                                                                         |                           |     |    |    |        |                                                                                      |         |         |         |   |         |        |
|-------------------------------------------|----|-------------------------------------------------------------------------|---------------------------|-----|----|----|--------|--------------------------------------------------------------------------------------|---------|---------|---------|---|---------|--------|
| [P02679]FIBG_HUMAN Fibrinogen gamma chain | 21 |                                                                         | ASTPNGYDNGHIWATWKTR       | 382 | 19 | 3  | 22.86  | b11b12y3                                                                             | 2151.05 | 51.864  | 4634    | 5 | 431.02  | -5.56  |
| [P02679]FIBG_HUMAN Fibrinogen gamma chain | 22 |                                                                         | TRWYSMK                   | 399 | 7  | 4  | 37.69  | b4*b4b5y5                                                                            | 971.47  | 102.704 | 2566    | 1 | 971.47  | -12.06 |
| [P02679]FIBG_HUMAN Fibrinogen gamma chain | 23 | Phosphoryl.STY(5)                                                       | AIQLTYNPDESSKPNMIDAATLK   | 88  | 23 | 3  | 22.19  | b3b4y14                                                                              | 2600.24 | 120.231 | 3887    | 3 | 867.42  | 7.79   |
| [P02679]FIBG_HUMAN Fibrinogen gamma chain | 24 | Oxidation+M(16)                                                         | AIQLTYNPDESSKPNMIDAATLK   | 88  | 23 | 8  | 53.86  | b10*b10b11b12*b12b13y11y14                                                           | 2536.23 | 100.415 | 130148  | 3 | 846.08  | -10.11 |
| [P02679]FIBG_HUMAN Fibrinogen gamma chain | 25 |                                                                         | YLQEIYNSNNQK              | 134 | 12 | 0  | 2.78   |                                                                                      | 1495.71 | 45.154  | 1894    | 3 | 499.24  | -1.31  |
| [P02768]ALBU_HUMAN Serum albumin          | 1  | Carbamidomethyl+C(3)                                                    | YICENQDSISSK              | 286 | 12 | 23 | 103.92 | b2b3b8*b8b9*b9*b9b11b12y2*y2y3*y3y4y9*y9*y9y10*y10*y10y11y12*y12                     | 1443.65 | 33.980  | 1485615 | 2 | 722.33  | 4.90   |
| [P02768]ALBU_HUMAN Serum albumin          | 2  | Carbamidomethyl+C(1);<br>Carbamidomethyl+C(2)                           | CCTESLVNR                 | 499 | 9  | 20 | 103.23 | b2b3b4y2*y2y3*y3y4*y4y5y6*y6*y6y7*y7*y7y8*y8y9*y9                                    | 1138.50 | 32.746  | 215526  | 2 | 569.75  | 0.21   |
| [P02768]ALBU_HUMAN Serum albumin          | 3  | Carbamidomethyl+C(14)                                                   | ALVLIAFAQYLQPCPFEDHVK     | 44  | 21 | 30 | 184.75 | b2b3b4b5b6b13b18*b18y2y3y4*y4y7y8*y8y10*y10*y10y11*y11y12*y12y13*y13*y13y15y18y19y21 | 2490.28 | 108.826 | 151267  | 3 | 830.77  | -0.49  |
| [P02768]ALBU_HUMAN Serum albumin          | 4  |                                                                         | LVNEVTEFAK                | 65  | 10 | 9  | 81.8   | b2y3y4*y4y5y6y8y9y10                                                                 | 1149.61 | 55.133  | 95036   | 2 | 575.31  | -3.19  |
| [P02768]ALBU_HUMAN Serum albumin          | 5  |                                                                         | VPQVSTPTLVEVSR            | 438 | 14 | 9  | 59.58  | b3*b3b4y1y3y9y10y11y14                                                               | 1511.84 | 60.545  | 89927   | 2 | 756.42  | -4.60  |
| [P02768]ALBU_HUMAN Serum albumin          | 6  |                                                                         | FQNALLVR                  | 426 | 8  | 8  | 49.63  | b2b4y2y3y4y6*y6y8                                                                    | 960.55  | 55.945  | 82233   | 2 | 480.78  | -9.28  |
| [P02768]ALBU_HUMAN Serum albumin          | 7  | Carbamidomethyl+C(3)                                                    | QNCLEFEQLGEYK             | 413 | 13 | 12 | 63.17  | b9b13y2y3y7*y7y8y9y10*y10y13*y13                                                     | 1657.76 | 71.445  | 72289   | 2 | 829.38  | 5.96   |
| [P02768]ALBU_HUMAN Serum albumin          | 8  | Carbamidomethyl+C(6);<br>Carbamidomethyl+C(7)                           | AAFTECCQAADK              | 186 | 12 | 13 | 79.58  | b1y1y2*y2y3y6*y6y7y8y9y10*y10y12                                                     | 1371.57 | 32.047  | 57974   | 2 | 686.29  | 2.05   |
| [P02768]ALBU_HUMAN Serum albumin          | 9  | Carbamidomethyl+C(3)                                                    | RPCFSALEVDETYVPK          | 508 | 16 | 7  | 17.33  | b2b6b14*b14y2y8y16                                                                   | 1910.92 | 65.775  | 34012   | 3 | 637.64  | -6.71  |
| [P02768]ALBU_HUMAN Serum albumin          | 10 |                                                                         | LYYEIAR                   | 161 | 7  | 7  | 57.01  | b5*b5b6*b6y2y3y6                                                                     | 927.49  | 80.136  | 26142   | 2 | 464.25  | -6.32  |
| [P02768]ALBU_HUMAN Serum albumin          | 11 | Carbamidomethyl+C(2)                                                    | LCTVATLR                  | 97  | 8  | 4  | 41.1   | y3y4y6y8                                                                             | 933.51  | 44.121  | 21949   | 2 | 467.26  | -7.06  |
| [P02768]ALBU_HUMAN Serum albumin          | 12 | Carbamidomethyl+C(2);<br>Carbamidomethyl+C(11)                          | TCVADESAENCDK             | 75  | 13 | 12 | 97.55  | b2b6*b6y5y6y7y8*y8y9y10y11y13                                                        | 1498.58 | 22.506  | 19437   | 2 | 749.80  | 3.75   |
| [P02768]ALBU_HUMAN Serum albumin          | 13 | Carbamidomethyl+C(1);<br>Carbamidomethyl+C(2);<br>Carbamidomethyl+C(10) | CCAAADPHECYAK             | 383 | 13 | 5  | 25.6   | b1b3y2y6y7                                                                           | 1552.59 | 24.712  | 11120   | 3 | 518.20  | -4.01  |
| [P02768]ALBU_HUMAN Serum albumin          | 14 | Carbamidomethyl+C(1);<br>Carbamidomethyl+C(2);<br>Carbamidomethyl+C(12) | CCTESLVNRRPCFSALEVDETYVPK | 499 | 25 | 5  | 12.5   | b1b15*b15y9y12                                                                       | 3030.40 | 80.106  | 3168    | 2 | 1515.70 | -4.35  |
| [P02768]ALBU_HUMAN Serum albumin          | 15 | Carbamidomethyl+C(9);<br>Carbamidomethyl+C(10)                          | ETYGEMADCCA               | 105 | 12 | 5  | 22.47  | b2*b2b6b10y5                                                                         | 1434.55 | 18.007  | 2383    | 2 | 717.78  | 11.74  |
| [P02768]ALBU_HUMAN Serum albumin          | 16 |                                                                         | AEFAEVSK                  | 249 | 8  | 4  | 36.33  | b3y3y6*y6                                                                            | 880.44  | 33.606  | 50307   | 2 | 440.72  | -4.64  |

|                                              |    |                                                                         |                                           |     |    |    |        |                                                                                                                  |         |         |         |   |         |        |
|----------------------------------------------|----|-------------------------------------------------------------------------|-------------------------------------------|-----|----|----|--------|------------------------------------------------------------------------------------------------------------------|---------|---------|---------|---|---------|--------|
| P02768 ALBU_HUMAN Serum albumin              | 17 |                                                                         | LVTDLTK                                   | 257 | 7  | 5  | 50.99  | b4°b4y3y5y6                                                                                                      | 789.47  | 71.158  | 33895   | 2 | 395.24  | -5.88  |
| P02768 ALBU_HUMAN Serum albumin              | 18 | Carbamidomethyl+C(14)                                                   | EFNAETFTFHADICTLSEK                       | 524 | 19 | 4  | 23.88  | b4b11b13y13                                                                                                      | 2260.07 | 101.019 | 10088   | 3 | 754.03  | 18.80  |
| P02768 ALBU_HUMAN Serum albumin              | 19 |                                                                         | SEVAHR                                    | 28  | 6  | 1  | 13.7   | y3                                                                                                               | 698.35  | 30.948  | 6094    | 2 | 349.68  | -11.62 |
| P02768 ALBU_HUMAN Serum albumin              | 20 | Carbamidomethyl+C(3)                                                    | SHCIAEVENDEMPADLPSLAADFV<br>ESK           | 310 | 27 | 7  | 35.79  | b4y6y9°y9y13y15y19                                                                                               | 2974.39 | 98.760  | 5699    | 3 | 992.13  | 14.20  |
| P02768 ALBU_HUMAN Serum albumin              | 21 |                                                                         | DVFLGMFLYEYAR                             | 347 | 13 | 6  | 62.78  | b6b10y6y7y8y9                                                                                                    | 1623.80 | 101.132 | 1970    | 2 | 812.40  | 6.39   |
| P02768 ALBU_HUMAN Serum albumin              | 22 |                                                                         | TPVSDR                                    | 490 | 6  | 1  | 13.7   | y4                                                                                                               | 674.34  | 31.189  | 1716    | 1 | 674.34  | -10.95 |
| P02768 ALBU_HUMAN Serum albumin              | 23 |                                                                         | KVPQVSTPTLVEVSR                           | 437 | 15 | 34 | 217.1  | b4*b4b5*b5b6°b6*b6b7<br>°b7*b7b9°b9b10*b10y3<br>y4°y4y5°y5y6y7y8°y8y9<br>°y9y10°y10y11°y11y12°<br>y12*y12y13*y13 | 1639.92 | 55.880  | 1627099 | 3 | 547.31  | -11.09 |
| P02768 ALBU_HUMAN Serum albumin              | 24 |                                                                         | FKDLGEENFK                                | 34  | 10 | 4  | 27.12  | b9*b9y6y9                                                                                                        | 1226.60 | 68.419  | 477849  | 2 | 613.80  | -2.69  |
| P02768 ALBU_HUMAN Serum albumin              | 25 | Carbamidomethyl+C(4);<br>Carbamidomethyl+C(17)                          | RMPCAEDYLSVVLNQLCVLHEK                    | 468 | 22 | 6  | 30.57  | b7y4y8°y8y9y13                                                                                                   | 2674.32 | 104.188 | 92514   | 3 | 892.11  | 2.83   |
| P02768 ALBU_HUMAN Serum albumin              | 26 | Carbamidomethyl+C(3)                                                    | DVCKNYAEAK                                | 337 | 10 | 3  | 27.12  | b6b9y8                                                                                                           | 1197.57 | 31.194  | 31662   | 2 | 599.29  | 10.91  |
| P02768 ALBU_HUMAN Serum albumin              | 27 | Carbamidomethyl+C(5);<br>Carbamidomethyl+C(6);<br>Carbamidomethyl+C(13) | VHTECCHGDLLCADDRDLAK                      | 264 | 22 | 4  | 18.37  | b3b12y10y13                                                                                                      | 2585.12 | 44.472  | 26084   | 3 | 862.38  | 1.61   |
| P02768 ALBU_HUMAN Serum albumin              | 28 |                                                                         | EQLKAVMDDFAAFVEK                          | 565 | 16 | 5  | 24.51  | b10b14*b14y3y8                                                                                                   | 1840.93 | 87.071  | 15135   | 2 | 920.97  | 6.10   |
| P02768 ALBU_HUMAN Serum albumin              | 29 |                                                                         | DVFLGMFLYEYARR                            | 347 | 14 | 4  | 31.8   | b3b6b8y8                                                                                                         | 1779.87 | 35.380  | 13725   | 3 | 593.96  | -10.70 |
| P02768 ALBU_HUMAN Serum albumin              | 30 | Carbamidomethyl+C(4);<br>Carbamidomethyl+C(5)                           | VTKCCTESLVNR                              | 496 | 12 | 3  | 26.45  | b11y9y10                                                                                                         | 1466.71 | 136.771 | 5624    | 1 | 1466.71 | 1.17   |
| P02768 ALBU_HUMAN Serum albumin              | 31 | Carbamidomethyl+C(8)                                                    | ADLAKYICENQDISSK                          | 281 | 17 | 3  | 16.47  | b6b11y8                                                                                                          | 1941.94 | 40.000  | 3378    | 3 | 647.99  | 11.50  |
| P02768 ALBU_HUMAN Serum albumin              | 32 | Carbamidomethyl+C(6);<br>Carbamidomethyl+C(7);<br>Carbamidomethyl+C(15) | AAFTECCQAADKAACLLPK                       | 186 | 19 | 4  | 28.7   | b3b5y15y16                                                                                                       | 2124.96 | 108.803 | 1854    | 4 | 532.00  | -13.90 |
| P02768 ALBU_HUMAN Serum albumin              | 33 |                                                                         | NYAEAKDVFLGMFLYEYAR                       | 341 | 19 | 3  | 22.86  | b16y4y5                                                                                                          | 2300.11 | 128.044 | 1668    | 3 | 767.38  | 2.76   |
| P02768 ALBU_HUMAN Serum albumin              | 34 | Carbamidomethyl+C(2);<br>Carbamidomethyl+C(3);<br>Carbamidomethyl+C(13) | ECCEKPLLEKSHCIAEVENDEMPA<br>DLPSLAADFVESK | 300 | 37 | 5  | 23.76  | b12y9y12y13y15                                                                                                   | 4260.96 | 115.590 | 1667    | 3 | 1420.99 | 4.24   |
| P02768 ALBU_HUMAN Serum albumin              | 35 | Phosphoryl STY(9)                                                       | DVFLGMFLYEYARR                            | 347 | 14 | 3  | 19.46  | b7y7y11                                                                                                          | 1859.84 | 91.168  | 1783    | 4 | 465.72  | -0.33  |
| P02768 ALBU_HUMAN Serum albumin              | 36 | Oxidation+M(6)                                                          | DVFLGMFLYEYAR                             | 347 | 13 | 4  | 34.71  | b11b12y5y11                                                                                                      | 1639.77 | 71.299  | 7121    | 3 | 547.26  | -7.37  |
| P02768 ALBU_HUMAN Serum albumin              | 37 | Oxidation+M(6)                                                          | DVFLGMFLYEYARR                            | 347 | 14 | 3  | 19.46  | b5b9y5                                                                                                           | 1795.88 | 69.235  | 2176    | 2 | 898.44  | -1.70  |
| P02768 ALBU_HUMAN Serum albumin              | 38 |                                                                         | LVNEVTEF                                  | 65  | 8  | 0  | 1.98   |                                                                                                                  | 950.48  | 55.058  | 141036  | 2 | 475.74  | -7.90  |
| P02775 CXCL7_HUMAN Platelet basic<br>protein | 1  |                                                                         | NIQSLEVIGK                                | 75  | 10 | 17 | 100.62 | b1*b1b2b3*b3b8y1y2y3<br>y4y5y6y7y8°y8*y8y10                                                                      | 1100.63 | 57.249  | 989966  | 2 | 550.82  | -3.11  |

|                                                     |    |                      |                              |     |    |    |        |                                                                             |         |         |        |   |         |        |
|-----------------------------------------------------|----|----------------------|------------------------------|-----|----|----|--------|-----------------------------------------------------------------------------|---------|---------|--------|---|---------|--------|
| P02775 CXCL7_HUMAN Platelet basic protein           | 2  | Carbamidomethyl+C(2) | ICLDPDAPR                    | 103 | 9  | 16 | 89.93  | b2b4b5b9°b9y1y2y3y5°y5y6y7°y7y8°y8y9                                        | 1056.51 | 47.512  | 841210 | 2 | 528.76  | -4.28  |
| P02775 CXCL7_HUMAN Platelet basic protein           | 3  |                      | GKEESLSDLYAELR               | 47  | 15 | 29 | 240.4  | b2b4°b4b6°b6b7b9b10b12°b12b14y1y2y3°y3y4°y4y5y6y7°y7y8y9y10y11y12y13°y13y15 | 1724.84 | 65.047  | 759023 | 2 | 862.92  | 0.99   |
| P02775 CXCL7_HUMAN Platelet basic protein           | 4  | Carbamidomethyl+C(4) | GTHCNQVEVIATLK               | 85  | 14 | 12 | 114.04 | b4b6b7°b7b9b10°b10b12y3y4y5y11                                              | 1569.78 | 52.041  | 229224 | 3 | 523.93  | -18.90 |
| P02775 CXCL7_HUMAN Platelet basic protein           | 5  |                      | EESLSDLYAELR                 | 49  | 13 | 5  | 50.65  | b4y4y5y8y9                                                                  | 1539.74 | 71.432  | 77196  | 2 | 770.37  | 16.41  |
| P02775 CXCL7_HUMAN Platelet basic protein           | 6  | Carbamidomethyl+C(3) | KICLDPDAPR                   | 102 | 10 | 11 | 116.93 | b5°b5b7b8y3y4y5°y5y7y8y9                                                    | 1184.61 | 42.136  | 191633 | 2 | 592.81  | -0.93  |
| P02775 CXCL7_HUMAN Platelet basic protein           | 7  |                      | GKEESLSDLYAELR               | 47  | 15 | 4  | 18.31  | b4y8°y8y10                                                                  | 1724.83 | 66.706  | 3068   | 3 | 575.62  | -1.27  |
| P02775 CXCL7_HUMAN Platelet basic protein           | 8  |                      | QSLEVIGK                     | 77  | 8  | 8  | 52.18  | b3*b3b4°b4b5°b5°b5b7                                                        | 873.50  | 57.309  | 24384  | 1 | 873.50  | 0.00   |
| P02775 CXCL7_HUMAN Platelet basic protein           | 9  |                      | LDPDAPR                      | 105 | 7  | 3  | 38.48  | b3b4b5                                                                      | 783.40  | 47.509  | 9211   | 1 | 783.40  | -1.32  |
| P02776 PLF4_HUMAN Platelet factor 4                 | 1  | Carbamidomethyl+C(5) | AGPHCPTAQLIATLK              | 62  | 15 | 17 | 187.94 | b4b5b7b8b9b10b13*b13b14y3y4y5y6y7y8y11y15                                   | 1577.83 | 61.455  | 386705 | 3 | 526.61  | -12.15 |
| P02776 PLF4_HUMAN Platelet factor 4                 | 2  |                      | HITSLEVIK                    | 53  | 9  | 14 | 111.02 | b1b2b4°b4b5°b5b6b7y2y3y4y7y8y9                                              | 1039.61 | 48.733  | 288121 | 2 | 520.31  | -2.47  |
| P02776 PLF4_HUMAN Platelet factor 4                 | 3  | Carbamidomethyl+C(2) | ICLDLQAPLYK                  | 81  | 11 | 11 | 67.42  | b2b4°b4b5y2y4y8y9y10°y10y11                                                 | 1333.72 | 74.076  | 125126 | 2 | 667.36  | 3.02   |
| P02776 PLF4_HUMAN Platelet factor 4                 | 4  | Carbamidomethyl+C(3) | KICLDLQAPLYK                 | 80  | 12 | 3  | 26.45  | b5y4y5                                                                      | 1461.82 | 67.803  | 72233  | 2 | 731.41  | 2.59   |
| P02776 PLF4_HUMAN Platelet factor 4                 | 5  | Carbamidomethyl+C(5) | AGPHCPTAQLIATLK              | 62  | 15 | 0  | 3.97   |                                                                             | 1560.81 | 61.387  | 5035   | 3 | 520.94  | -5.87  |
| P04075 ALDOA_HUMAN Fructose-bisphosphate aldolase A | 1  |                      | IGEHTPSALAIMENANVLAR         | 153 | 20 | 11 | 37.98  | b5°b5b8°b8y1y2y3y6y8y9y20                                                   | 2107.09 | 81.269  | 111244 | 3 | 703.03  | -3.71  |
| P04075 ALDOA_HUMAN Fructose-bisphosphate aldolase A | 2  | Carbamidomethyl+C(5) | YASICQQNGIVPIVEPEILPDGDHDLKR | 173 | 28 | 20 | 104.49 | b4b9b10°b10°b10b11°b11°b11y1y3y5y7y9y10y11y13y14°y14y17y28                  | 3176.58 | 76.588  | 94936  | 4 | 794.90  | -7.07  |
| P04075 ALDOA_HUMAN Fructose-bisphosphate aldolase A | 3  | Carbamidomethyl+C(8) | ALANSLACQGK                  | 331 | 11 | 10 | 48.1   | b2b3b8y2y4*y4y5y8°y8y11                                                     | 1132.58 | 35.993  | 75951  | 2 | 566.79  | -0.54  |
| P04075 ALDOA_HUMAN Fructose-bisphosphate aldolase A | 4  |                      | GVVPLAGTNGETTTQGLDGLSER      | 111 | 23 | 7  | 41.39  | b3y3y7y14y17y20y23                                                          | 2272.17 | 65.464  | 44850  | 2 | 1136.59 | 12.89  |
| P04075 ALDOA_HUMAN Fructose-bisphosphate aldolase A | 5  |                      | MPYQYPALTPEQK                | 0   | 13 | 7  | 30.07  | b3b6b11b13y1y13*y13                                                         | 1565.76 | 60.099  | 43116  | 3 | 522.59  | -3.66  |
| P04075 ALDOA_HUMAN Fructose-bisphosphate aldolase A | 6  |                      | GILAADESTGSIK                | 28  | 14 | 9  | 69.49  | b4b7b13y1y8y9y11y12y14                                                      | 1332.70 | 49.052  | 42323  | 2 | 666.86  | 2.02   |
| P04075 ALDOA_HUMAN Fructose-bisphosphate aldolase A | 7  |                      | AAQEEYVKR                    | 322 | 9  | 4  | 38.48  | y2y3y4y5                                                                    | 1093.56 | 20.325  | 6374   | 2 | 547.29  | 1.00   |
| P04075 ALDOA_HUMAN Fructose-bisphosphate aldolase A | 8  | Carbamidomethyl+C(1) | CPLLKPWALTFSYGR              | 289 | 15 | 7  | 64.16  | b3b4b6y3y5y7y12                                                             | 1808.93 | 86.339  | 23378  | 3 | 603.65  | -9.31  |
| P04075 ALDOA_HUMAN Fructose-bisphosphate aldolase A | 9  | Carbamidomethyl+C(4) | VNPCIQGVILFHETLYQK           | 69  | 18 | 6  | 53.1   | b4b5°b5b6b7b9                                                               | 2088.13 | 101.206 | 18144  | 2 | 1044.57 | 14.97  |
| P04075 ALDOA_HUMAN Fructose-bisphosphate aldolase A | 10 |                      | VDKGVVPLAGTNGETTTQGLDGLSER   | 108 | 26 | 6  | 31.97  | b5b6y10y12*y12y14                                                           | 2614.33 | 61.295  | 59989  | 3 | 872.11  | -1.49  |
| P04075 ALDOA_HUMAN Fructose-bisphosphate aldolase A | 11 | Phosphoryl STY(6)    | AAQEEYVKR                    | 322 | 9  | 4  | 45.25  | b3b4y4y6                                                                    | 1173.53 | 54.533  | 10406  | 2 | 587.27  | 6.76   |
| P04075 ALDOA_HUMAN Fructose-bisphosphate aldolase A | 12 | Phosphoryl STY(9)    | GILAADESTGSIK                | 28  | 15 | 5  | 29.7   | b7°b7y7y13y14                                                               | 1568.78 | 91.730  | 4349   | 2 | 784.89  | 11.52  |
| P04075 ALDOA_HUMAN Fructose-bisphosphate aldolase A | 13 |                      | QEEYVKR                      | 324 | 7  | 0  | 1.59   |                                                                             | 951.49  | 20.326  | 2791   | 2 | 476.25  | -2.37  |

|                                                             |    |                                             |                             |     |    |    |        |                                                                                       |         |         |        |   |         |        |
|-------------------------------------------------------------|----|---------------------------------------------|-----------------------------|-----|----|----|--------|---------------------------------------------------------------------------------------|---------|---------|--------|---|---------|--------|
| P04075 ALDOA_HUMAN Fructose-bisphosphate aldolase A         | 14 |                                             | AQEEYVVKR                   | 323 | 8  | 0  | 1.59   |                                                                                       | 1022.53 | 20.347  | 2214   | 2 | 511.77  | 2.27   |
| P04350 TBB4_HUMAN Tubulin beta-4 chain                      | 1  |                                             | LAVNMVPPFR                  | 252 | 10 | 10 | 88.11  | b2b5*b5y4y5y6y7y8y9y10                                                                | 1143.63 | 73.053  | 165955 | 2 | 572.32  | -2.99  |
| P04350 TBB4_HUMAN Tubulin beta-4 chain                      | 2  |                                             | SGPFGQIFRPDNFVFGQSGAGNNWAK  | 77  | 26 | 19 | 104.86 | b2*b2b3b5b7*b7b13b14*b14b15b16y1y4y6y9y12y14y18y26                                    | 2798.37 | 90.282  | 157550 | 3 | 933.46  | 8.55   |
| P04350 TBB4_HUMAN Tubulin beta-4 chain                      | 3  | Carbamidomethyl+C(23)                       | LTTPTYGDLNHLVSATMSGVTTCLR   | 216 | 25 | 10 | 75.02  | y2y3y5y6y7y8y12y13y22y25                                                              | 2708.34 | 96.113  | 91949  | 3 | 903.45  | 0.45   |
| P04350 TBB4_HUMAN Tubulin beta-4 chain                      | 4  |                                             | IMNTFSVVPSPK                | 162 | 12 | 5  | 34.53  | b3y4y7y8y12                                                                           | 1319.70 | 64.056  | 73068  | 2 | 660.35  | -1.39  |
| P04350 TBB4_HUMAN Tubulin beta-4 chain                      | 5  |                                             | NSSYFVEWIPNNVK              | 336 | 14 | 13 | 70.45  | b1*b1b2b8b9*b9b10y6y8y11y12*y12y14                                                    | 1696.85 | 81.608  | 69008  | 2 | 848.93  | 7.63   |
| P04350 TBB4_HUMAN Tubulin beta-4 chain                      | 6  |                                             | INVYYNEATGGNYVPR            | 46  | 16 | 6  | 35.1   | b7b10b13b16y5y13                                                                      | 1829.87 | 82.308  | 18497  | 2 | 915.44  | -4.27  |
| P04350 TBB4_HUMAN Tubulin beta-4 chain                      | 7  |                                             | MAATFIGNSTAIQELFK           | 362 | 17 | 4  | 33.96  | b4b6b7b9                                                                              | 1841.97 | 116.852 | 81639  | 3 | 614.66  | 11.47  |
| P04350 TBB4_HUMAN Tubulin beta-4 chain                      | 8  |                                             | EVDEQMLSVQSK                | 324 | 12 | 5  | 44.52  | b5b7b8y7y11                                                                           | 1392.69 | 88.798  | 5883   | 2 | 696.85  | 19.72  |
| P04406 G3P_HUMAN Glycerinaldehyde-3-phosphate dehydrogenase | 1  |                                             | VIHDNFGIVEGLMTTVHAIATQK     | 162 | 24 | 32 | 200.21 | b2b3b4*b4b5b6b7*b7b8*b8b9b14*b14y2*y2y3*y3y4*y4y5*y5y6y7y8y11y12*y12*y12y14y15*y15y24 | 2595.33 | 104.063 | 252615 | 4 | 649.59  | -11.19 |
| P04406 G3P_HUMAN Glycerinaldehyde-3-phosphate dehydrogenase | 2  |                                             | LVINGNPITIFQERDPSK          | 66  | 18 | 9  | 50.67  | b2y3*y3y8y12y14*y14y16y18                                                             | 2041.09 | 78.102  | 164832 | 3 | 681.04  | -7.12  |
| P04406 G3P_HUMAN Glycerinaldehyde-3-phosphate dehydrogenase | 3  |                                             | LISWYDNEFGYSNR              | 309 | 14 | 13 | 140.35 | b3y3y4y5y6y7y8y9y10y11y12y14*y14                                                      | 1763.81 | 76.724  | 160121 | 2 | 882.41  | 5.05   |
| P04406 G3P_HUMAN Glycerinaldehyde-3-phosphate dehydrogenase | 4  | Carbamidomethyl+C(7); Carbamidomethyl+C(11) | IISNASCTTNCLAPLAK           | 145 | 17 | 25 | 182.71 | b2b11b12*b12b13*b13*b13b16y2y3y4y5y6y8y9y11*y11y12*y12y13*y13y14y15*y15y17            | 1833.93 | 55.224  | 157699 | 2 | 917.47  | 3.99   |
| P04406 G3P_HUMAN Glycerinaldehyde-3-phosphate dehydrogenase | 5  | Carbamidomethyl+C(13)                       | VPTANVSVVDLTCR              | 234 | 14 | 11 | 104.05 | b5b12b14y4y5y6y8y10y12y13y14                                                          | 1530.80 | 62.033  | 136480 | 2 | 765.90  | 3.83   |
| P04406 G3P_HUMAN Glycerinaldehyde-3-phosphate dehydrogenase | 6  |                                             | GALQNIIPASTGAAK             | 200 | 15 | 8  | 59.01  | b4y2y4y8y9y10y11y15                                                                   | 1411.79 | 60.472  | 126287 | 2 | 706.40  | 0.61   |
| P04406 G3P_HUMAN Glycerinaldehyde-3-phosphate dehydrogenase | 7  |                                             | VGVNGFGR                    | 5   | 8  | 10 | 54.4   | b1b4b7y1y2y5*y5y7*y7y8                                                                | 805.42  | 40.174  | 103168 | 2 | 403.22  | -10.23 |
| P04406 G3P_HUMAN Glycerinaldehyde-3-phosphate dehydrogenase | 8  |                                             | VIISAPSADAPMFVMGVNHEK       | 118 | 21 | 11 | 71.84  | b2b3b5y3y6y11y12y14y15y16y21                                                          | 2213.10 | 76.030  | 84099  | 3 | 738.37  | -3.09  |
| P04406 G3P_HUMAN Glycerinaldehyde-3-phosphate dehydrogenase | 9  |                                             | LVINGNPITIFQER              | 66  | 14 | 8  | 60.83  | b2b3y3y4y6y8y11y14                                                                    | 1613.89 | 84.919  | 80515  | 2 | 807.45  | -5.22  |
| P04406 G3P_HUMAN Glycerinaldehyde-3-phosphate dehydrogenase | 10 |                                             | VDIVAINDPFIDLNYMVMFQYDSTHGK | 27  | 28 | 20 | 166.32 | b1b3b4b5b6y2y4y5y6y7*y7y8*y8y9y10y11y12y22y24y28                                      | 3308.57 | 125.816 | 29691  | 3 | 1103.53 | 2.36   |

|                                                            |    |                                                     |                                         |     |    |    |       |                                                               |         |         |        |   |         |        |
|------------------------------------------------------------|----|-----------------------------------------------------|-----------------------------------------|-----|----|----|-------|---------------------------------------------------------------|---------|---------|--------|---|---------|--------|
| P04406 G3P_HUMAN Glycer aldehyde-3-phosphate dehydrogenase | 11 |                                                     | VIPELNGK                                | 219 | 8  | 6  | 54.4  | y3*y3y4y5y6*y6                                                | 869.49  | 43.253  | 42989  | 2 | 435.25  | -17.90 |
| P04406 G3P_HUMAN Glycer aldehyde-3-phosphate dehydrogenase | 12 |                                                     | VVDLMAHMASK                             | 323 | 11 | 3  | 31.5  | y3y4y7                                                        | 1201.59 | 53.052  | 21934  | 3 | 401.20  | -16.86 |
| P04406 G3P_HUMAN Glycer aldehyde-3-phosphate dehydrogenase | 13 |                                                     | WGDAGAEYVVESTGVFTTMEK                   | 86  | 21 | 3  | 14    | b10y9y11                                                      | 2277.00 | 58.807  | 2432   | 2 | 1139.00 | -15.65 |
| P04406 G3P_HUMAN Glycer aldehyde-3-phosphate dehydrogenase | 14 |                                                     | VIISAPSADAPMFVMGVNHEKYD<br>NSLK         | 118 | 27 | 13 | 99.75 | b3b12b21b23y6y10y11y<br>12y13y19y21y22y24                     | 2933.43 | 75.043  | 75082  | 4 | 734.11  | -7.57  |
| P04406 G3P_HUMAN Glycer aldehyde-3-phosphate dehydrogenase | 15 |                                                     | AAFNSGKVDIVAINDPFIDLNYMV<br>YMFQYDSTHGK | 20  | 35 | 10 | 47.42 | b6b7*b7b8b15y6*y6y8y<br>11y22                                 | 3983.89 | 119.683 | 9646   | 4 | 996.73  | -2.33  |
| P04406 G3P_HUMAN Glycer aldehyde-3-phosphate dehydrogenase | 16 |                                                     | IKWGDAGAEYVVESTGVFTTMEK                 | 84  | 23 | 8  | 35.67 | b7*b7b9*b9b14y3y8y9                                           | 2518.19 | 114.940 | 4133   | 3 | 840.07  | -9.70  |
| P04406 G3P_HUMAN Glycer aldehyde-3-phosphate dehydrogenase | 17 | Carbamidomethyl+C(13)<br>:Phosphoryl STY(7)         | VPTANVSVVDLTCR                          | 234 | 14 | 3  | 19.46 | b7y3y6                                                        | 1610.75 | 107.158 | 207513 | 2 | 805.88  | -0.38  |
| P04406 G3P_HUMAN Glycer aldehyde-3-phosphate dehydrogenase | 18 | Phosphoryl STY(10)                                  | VVDLMAHMASK                             | 323 | 11 | 3  | 27.52 | b8b9y9_HPO3 y9                                                | 1281.56 | 41.346  | 6725   | 2 | 641.28  | -3.43  |
| P04406 G3P_HUMAN Glycer aldehyde-3-phosphate dehydrogenase | 19 | Phosphoryl STY(15)                                  | VDIVAINDPFIDLNYMVYMFQYDS<br>THGK        | 27  | 28 | 4  | 15.06 | b4b14y7y12_H3PO4<br>y12                                       | 3388.57 | 110.856 | 2264   | 3 | 1130.19 | 13.83  |
| P04406 G3P_HUMAN Glycer aldehyde-3-phosphate dehydrogenase | 20 | Oxidation+M(12)                                     | VIISAPSADAPMFVMGVNHEK                   | 118 | 21 | 7  | 48.42 | y7*y7y8*y8y9*y9y10                                            | 2229.09 | 38.006  | 286417 | 4 | 558.03  | -7.12  |
| P04406 G3P_HUMAN Glycer aldehyde-3-phosphate dehydrogenase | 21 | Oxidation+M(8)                                      | VVDLMAHMASK                             | 323 | 11 | 4  | 38.6  | b4b7y8y9                                                      | 1217.59 | 32.150  | 1861   | 2 | 609.30  | -10.53 |
| P04406 G3P_HUMAN Glycer aldehyde-3-phosphate dehydrogenase | 22 |                                                     | GALQNIIPASTG                            | 200 | 12 | 1  | 7.27  | y9                                                            | 1141.61 | 60.496  | 56398  | 2 | 571.31  | -13.15 |
| P06396 GELS_HUMAN Gelsolin                                 | 1  |                                                     | VPFDAATLHTSTAMAAQHGMDD<br>DGTGQK        | 419 | 28 | 14 | 59.59 | b2b4b5b10b14b27y1y6°<br>y6y10y14y19y24y28                     | 2873.26 | 57.381  | 176101 | 4 | 719.07  | -8.41  |
| P06396 GELS_HUMAN Gelsolin                                 | 2  |                                                     | AGALNSNDAFVLK                           | 584 | 13 | 6  | 29.94 | b3b11b13y4y9y13                                               | 1319.69 | 61.109  | 156623 | 2 | 660.35  | -2.96  |
| P06396 GELS_HUMAN Gelsolin                                 | 3  |                                                     | NWRDPDQTDGLGLSYLSSHIANV<br>ER           | 394 | 25 | 11 | 47.49 | b2b3b4b6b12*b12y8y10<br>y12y14y25                             | 2843.35 | 78.762  | 121620 | 4 | 711.59  | -6.78  |
| P06396 GELS_HUMAN Gelsolin                                 | 4  |                                                     | AQPVQVAEGSEPDGFWEALGGK                  | 626 | 22 | 17 | 79.55 | b2*b2b5b9b12*b12y3y4<br>y5y9*y9y11*y11y14y16°<br>y16y22       | 2272.12 | 83.173  | 111100 | 2 | 1136.56 | 12.36  |
| P06396 GELS_HUMAN Gelsolin                                 | 5  |                                                     | QTQVSVLPEGGETPLFK                       | 373 | 17 | 17 | 78.21 | b4b5*b5b7*b14*b14b16<br>*b16y2y4y10*y10y12y1<br>3y14y17*y17   | 1829.97 | 73.480  | 106467 | 2 | 915.49  | 4.14   |
| P06396 GELS_HUMAN Gelsolin                                 | 6  |                                                     | TGAQELLR                                | 615 | 8  | 6  | 57.41 | b2y3y4y6y7y8                                                  | 887.49  | 41.765  | 91661  | 2 | 444.25  | -10.73 |
| P06396 GELS_HUMAN Gelsolin                                 | 7  | Carbamidomethyl+C(16)<br>;Carbamidomethyl+C(29<br>) | ATEVPVSWESFNNGDCFILDG<br>NIHQWCGSNSNR   | 199 | 35 | 19 | 97.15 | b2*b2b3*b3b4b5b10b11<br>b13y6y8y14*y14y15*y1<br>5y16y17y19y35 | 4037.82 | 100.425 | 72600  | 3 | 1346.61 | 7.74   |
| P06396 GELS_HUMAN Gelsolin                                 | 8  |                                                     | EVQGFESATFLGYFK                         | 147 | 15 | 12 | 63.74 | b2*b2b3b10y3y4y10y12<br>y14*y14y15*y15                        | 1722.84 | 90.927  | 58568  | 2 | 861.93  | 4.25   |
| P06396 GELS_HUMAN Gelsolin                                 | 9  |                                                     | HVVPNEVVVQR                             | 177 | 11 | 9  | 82.49 | b2b3b7y4y5y8y9y10y11                                          | 1275.72 | 38.761  | 35736  | 2 | 638.36  | 2.49   |



|                                  |    |                                                     |                                             |     |    |    |        |                                                            |         |         |       |   |         |        |
|----------------------------------|----|-----------------------------------------------------|---------------------------------------------|-----|----|----|--------|------------------------------------------------------------|---------|---------|-------|---|---------|--------|
| IP06396 GELS_HUMAN Gelsolin      | 10 |                                                     | YIETDPANR                                   | 729 | 9  | 8  | 38.48  | b2y4*y4y5*y5y7*y7y9                                        | 1078.52 | 30.121  | 35238 | 2 | 539.76  | 1.58   |
| IP06396 GELS_HUMAN Gelsolin      | 11 |                                                     | AVEVLPK                                     | 577 | 7  | 5  | 40.7   | b1y3y4y5y7                                                 | 755.46  | 40.343  | 30271 | 2 | 378.23  | -10.34 |
| IP06396 GELS_HUMAN Gelsolin      | 12 |                                                     | VSNGAGTMSVSLVADENPFAQGA<br>LK               | 302 | 25 | 12 | 56.01  | b7b8b11b12*b12b16y2y<br>11y12*y12y25*y25                   | 2463.26 | 83.290  | 15684 | 2 | 1232.13 | 14.87  |
| IP06396 GELS_HUMAN Gelsolin      | 13 |                                                     | QGQIYNWQGAQSTQDEVAASAIL<br>TAQLDEELGGTPVQSR | 485 | 40 | 4  | 23.56  | b4b6b7*b7                                                  | 4273.11 | 98.737  | 4269  | 3 | 1425.04 | 3.20   |
| IP06396 GELS_HUMAN Gelsolin      | 14 |                                                     | QGFEPSPFVGWFLGWDDDYWSV<br>DPLDR             | 748 | 27 | 9  | 26.22  | b2b3*b3b11b12y1y2y4y<br>7                                  | 3230.47 | 132.045 | 3015  | 3 | 1077.49 | 4.01   |
| IP06396 GELS_HUMAN Gelsolin      | 15 |                                                     | TPSAAYLWVGTGASEAEK                          | 597 | 18 | 4  | 25.05  | b3b8b13y9                                                  | 1837.88 | 110.940 | 1958  | 2 | 919.44  | -10.56 |
| IP06396 GELS_HUMAN Gelsolin      | 16 | Carbamidomethyl+C(4)                                | SEDCFILDHGK                                 | 327 | 11 | 4  | 41.79  | b8y3y4y5                                                   | 1320.58 | 49.021  | 34056 | 3 | 440.86  | -10.08 |
| IP06396 GELS_HUMAN Gelsolin      | 17 |                                                     | LFQVK                                       | 188 | 5  | 1  | 13.3   | y4                                                         | 634.40  | 42.095  | 14827 | 1 | 634.40  | 10.49  |
| IP06396 GELS_HUMAN Gelsolin      | 18 |                                                     | VPVDPATYQGQFYGGDSYIILYNYR                   | 457 | 24 | 7  | 30.7   | b9b16b18*b18y5y12y14                                       | 2771.29 | 90.130  | 14656 | 3 | 924.44  | -15.42 |
| IP06396 GELS_HUMAN Gelsolin      | 19 |                                                     | VHVSEEGTEPEAMLQVLGPKPAL<br>PAGTEDTAK        | 257 | 32 | 3  | 11.19  | b3b10y8                                                    | 3301.68 | 74.865  | 8929  | 3 | 1101.23 | 5.92   |
| IP06396 GELS_HUMAN Gelsolin      | 20 |                                                     | DPDQTDGLGLSYLSSHIANVER                      | 397 | 22 | 3  | 20.07  | b8b15b18                                                   | 2387.12 | 69.192  | 4167  | 3 | 796.38  | -12.68 |
| IP06396 GELS_HUMAN Gelsolin      | 21 |                                                     | FDLVPVPTNLYGDFFTGDAYVILK                    | 75  | 24 | 4  | 12.81  | b4b13y10*y10                                               | 2704.40 | 116.236 | 3154  | 2 | 1352.71 | 4.97   |
| IP06396 GELS_HUMAN Gelsolin      | 22 |                                                     | IEGSNKVPVDPATYQGQFYGGDSYI<br>ILYNYR         | 451 | 30 | 13 | 87.25  | b7b10b25b26y3y4y5*y5<br>y6y9y12y13y23                      | 3399.67 | 85.527  | 83285 | 3 | 1133.89 | 4.74   |
| IP06396 GELS_HUMAN Gelsolin      | 23 | Carbamidomethyl+C(16)<br>;Carbamidomethyl+C(29<br>) | ATEVPPVSWESFNNGDCFILDLGN<br>NIHQWCGSNSNRYER | 199 | 38 | 6  | 24.3   | b3b4*b4y7*y7y10                                            | 4486.01 | 97.653  | 11426 | 4 | 1122.26 | 2.50   |
| IP06396 GELS_HUMAN Gelsolin      | 24 |                                                     | MDYPKQTQVSVLPEGGETPLFK                      | 368 | 22 | 3  | 20.07  | b5b7b9                                                     | 2464.23 | 84.885  | 9167  | 2 | 1232.62 | -7.03  |
| IP06396 GELS_HUMAN Gelsolin      | 25 |                                                     | YIETDPANRDR                                 | 729 | 11 | 3  | 24.51  | b7b9y9                                                     | 1349.66 | 51.925  | 8267  | 2 | 675.33  | 12.48  |
| IP06396 GELS_HUMAN Gelsolin      | 26 |                                                     | VPFDAATLHTSTAMAAQHGMDD<br>DGTGQKQIWR        | 419 | 32 | 4  | 17     | b7*b7b11b16                                                | 3456.56 | 84.690  | 8115  | 3 | 1152.86 | -11.87 |
| IP06396 GELS_HUMAN Gelsolin      | 27 |                                                     | KMDAHPFR                                    | 660 | 8  | 5  | 67.7   | b3b4b5b6b7                                                 | 951.48  | 99.566  | 7655  | 1 | 951.48  | -7.70  |
| IP06396 GELS_HUMAN Gelsolin      | 28 |                                                     | EVQGFESATFLGYFKSGLK                         | 147 | 19 | 3  | 24.26  | b6b9b10                                                    | 2108.08 | 44.489  | 5343  | 4 | 527.77  | 2.66   |
| IP06396 GELS_HUMAN Gelsolin      | 29 |                                                     | GGTSREGGQTAPASTR                            | 548 | 16 | 7  | 53.17  | b5*b5b6b10b11y3y11                                         | 1532.74 | 104.469 | 4894  | 3 | 511.58  | -3.74  |
| IP06396 GELS_HUMAN Gelsolin      | 30 |                                                     | TASDFITKMDYPK                               | 360 | 13 | 4  | 32.58  | b4y4y5y7                                                   | 1516.72 | 30.653  | 3270  | 2 | 758.86  | -10.38 |
| IP06396 GELS_HUMAN Gelsolin      | 31 |                                                     | VSNGAGTMSVSLVADENPFAQGA<br>LK               | 302 | 25 | 0  | 7.94   |                                                            | 2446.16 | 83.277  | 8098  | 2 | 1223.58 | -11.48 |
| IP06733 ENOA_HUMAN Alpha-enolase | 1  |                                                     | YISPDQLADLYK                                | 269 | 12 | 5  | 29.67  | b2y5y9y10y12                                               | 1425.73 | 73.655  | 78486 | 2 | 713.37  | 4.88   |
| IP06733 ENOA_HUMAN Alpha-enolase | 2  |                                                     | HIADLAGNSEVILPVPFNVINGGS<br>HAGNK           | 132 | 30 | 17 | 102.33 | b4b7b8b10b11b12*b12b<br>13y8y12*y12y15*y15y1<br>6y17y23y30 | 3011.55 | 85.158  | 65483 | 4 | 753.64  | -7.46  |
| IP06733 ENOA_HUMAN Alpha-enolase | 3  | Carbamidomethyl+C(14)                               | VNQIGSVTESLQACK                             | 343 | 15 | 9  | 55.71  | b15y4*y4y5y9*y9y10y1<br>ly15                               | 1633.82 | 54.913  | 49642 | 2 | 817.42  | 1.27   |
| IP06733 ENOA_HUMAN Alpha-enolase | 4  |                                                     | LAMQEFMILPVGAANFR                           | 162 | 17 | 7  | 56.3   | b4y6y7y8y9y11y17                                           | 1908.00 | 100.784 | 48064 | 2 | 954.50  | 7.55   |
| IP06733 ENOA_HUMAN Alpha-enolase | 5  |                                                     | DATNVGDEGGFAPNILENKEGLEL<br>LK              | 202 | 26 | 6  | 22.9   | b2b3*b3b5b6y26                                             | 2743.38 | 85.150  | 45883 | 3 | 915.13  | 0.18   |
| IP06733 ENOA_HUMAN Alpha-enolase | 6  |                                                     | SFIKDYPVVSIEDPFDQDDWGAW<br>QK               | 281 | 25 | 6  | 26.03  | b6b13y2y12*y12y13                                          | 2985.41 | 95.970  | 43003 | 3 | 995.81  | 4.91   |
| IP06733 ENOA_HUMAN Alpha-enolase | 7  |                                                     | AAVPSGASTGIYEALRLR                          | 32  | 18 | 10 | 41.21  | b2b7*b7b12*b12y7y11y<br>14y15y18                           | 1804.96 | 78.992  | 26044 | 2 | 902.98  | 7.10   |
| IP06733 ENOA_HUMAN Alpha-enolase | 8  |                                                     | IGAEVYHNLK                                  | 183 | 10 | 5  | 41.89  | y3y5*y5y7y10                                               | 1143.62 | 39.930  | 16089 | 2 | 572.31  | 0.96   |

|                                                |    |                      |                                   |     |    |    |        |                                                      |         |         |        |   |         |        |
|------------------------------------------------|----|----------------------|-----------------------------------|-----|----|----|--------|------------------------------------------------------|---------|---------|--------|---|---------|--------|
| P06733 ENOA_HUMAN Alpha-enolase                | 9  |                      | YGKDATNVGDEGGFAPNILENKE<br>GLELLK | 199 | 29 | 6  | 24.96  | b4b6°b6b8°b8b18                                      | 3091.54 | 80.088  | 9560   | 4 | 773.64  | -5.13  |
| P06733 ENOA_HUMAN Alpha-enolase                | 10 |                      | GNPTVEVDLFTSK                     | 15  | 13 | 9  | 68.51  | b3b7b8°b8y6y8°y8y9y1<br>0                            | 1406.72 | 68.549  | 49795  | 2 | 703.86  | 1.30   |
| P06733 ENOA_HUMAN Alpha-enolase                | 11 |                      | NPLAK                             | 429 | 5  | 2  | 26.6   | b3b4                                                 | 542.33  | 61.717  | 42845  | 1 | 542.33  | -3.60  |
| P06733 ENOA_HUMAN Alpha-enolase                | 12 |                      | LAQANGWGVMSHR                     | 358 | 14 | 9  | 104.05 | b5b10y3y4y6y7y9y10y1<br>1                            | 1525.74 | 55.702  | 41521  | 3 | 509.25  | -20.56 |
| P06733 ENOA_HUMAN Alpha-enolase                | 13 |                      | DYPVVSIEDPFDQDDWGAWQK             | 285 | 21 | 5  | 14     | b10y5°y5y13°y13                                      | 2510.14 | 64.762  | 30436  | 3 | 837.38  | 9.34   |
| P06733 ENOA_HUMAN Alpha-enolase                | 14 |                      | VVIGMDVAASEFFR                    | 239 | 14 | 3  | 19.46  | b6b11y7                                              | 1540.79 | 62.881  | 9482   | 2 | 770.90  | 7.53   |
| P06733 ENOA_HUMAN Alpha-enolase                | 15 |                      | EIFDSR                            | 9   | 6  | 1  | 13.7   | y3                                                   | 766.38  | 30.670  | 3177   | 1 | 766.38  | 10.59  |
| P06733 ENOA_HUMAN Alpha-enolase                | 16 |                      | LMIEMDGTEK                        | 92  | 11 | 3  | 24.51  | b10y4y9                                              | 1280.61 | 136.259 | 2068   | 1 | 1280.61 | 17.63  |
| P06733 ENOA_HUMAN Alpha-enolase                | 17 |                      | AGYTDK                            | 233 | 6  | 2  | 27     | b4y3                                                 | 654.31  | 54.560  | 2067   | 1 | 654.31  | 1.77   |
| P06733 ENOA_HUMAN Alpha-enolase                | 18 |                      | IHAREIFDSR                        | 5   | 10 | 3  | 28.88  | b5y6y7                                               | 1243.66 | 28.243  | 151336 | 2 | 622.34  | 7.66   |
| P06733 ENOA_HUMAN Alpha-enolase                | 19 |                      | SPDDPSRYISPDQLADLYK               | 262 | 19 | 3  | 15.08  | b7b14y9                                              | 2180.03 | 86.293  | 5819   | 3 | 727.35  | -8.06  |
| P06733 ENOA_HUMAN Alpha-enolase                | 20 |                      | LMIEMDGTEKSK                      | 92  | 13 | 3  | 28.31  | y8y11y12                                             | 1495.69 | 54.462  | 2625   | 2 | 748.35  | -12.81 |
| P06733 ENOA_HUMAN Alpha-enolase                | 21 | Oxidation+M()        | LAMQEFMILPVGAA NFREAMR            | 162 | 21 | 3  | 23.66  | y6y9y10                                              | 2411.21 | 44.015  | 179950 | 4 | 603.56  | 1.32   |
| P06733 ENOA_HUMAN Alpha-enolase                | 22 | Oxidation+M(3)       | LAMQEFMILPVGAA NFR                | 162 | 17 | 4  | 23.16  | b10b14y4y13                                          | 1923.97 | 107.272 | 14300  | 2 | 962.49  | -8.57  |
| P06733 ENOA_HUMAN Alpha-enolase                | 23 |                      | NSEVILPVPAFN VINGGSHAGNK          | 139 | 23 | 1  | 9.24   | b4                                                   | 2334.20 | 85.101  | 12634  | 3 | 778.74  | -8.68  |
| P06733 ENOA_HUMAN Alpha-enolase                | 24 |                      | DWGAWQK                           | 299 | 7  | 0  | 7.94   |                                                      | 890.42  | 96.053  | 1875   | 1 | 890.42  | 0.96   |
| P06753 TPM3_HUMAN Tropomyosin<br>alpha-3 chain | 1  |                      | IQLVEEELDR                        | 91  | 10 | 19 | 127.22 | b2°b2b3b4b7y1y2y3y4y<br>5°y5y6y7°y7y8y9°y9°y9<br>y10 | 1243.66 | 59.697  | 442286 | 2 | 622.33  | 1.77   |
| P06753 TPM3_HUMAN Tropomyosin<br>alpha-3 chain | 2  |                      | MELQEIQLK                         | 140 | 9  | 4  | 38.48  | y4y5y7y9                                             | 1131.60 | 62.781  | 97333  | 2 | 566.31  | -3.02  |
| P06753 TPM3_HUMAN Tropomyosin<br>alpha-3 chain | 3  |                      | AADAEAEVASLNRR                    | 77  | 14 | 6  | 27.25  | y7°y7y9°y9y10°y10                                    | 1472.73 | 39.022  | 72848  | 3 | 491.58  | -10.44 |
| P06753 TPM3_HUMAN Tropomyosin<br>alpha-3 chain | 4  |                      | LATALQK                           | 105 | 7  | 8  | 64.29  | b4°b4y3y4y5y6°y6y7                                   | 744.45  | 28.993  | 31476  | 2 | 372.73  | -13.77 |
| P06753 TPM3_HUMAN Tropomyosin<br>alpha-3 chain | 5  |                      | AADAEAEVASLNR                     | 77  | 13 | 11 | 63.17  | b2b4y6°y6y7°y7y8y10y<br>11°y11y13                    | 1316.65 | 41.823  | 15325  | 2 | 658.83  | 1.30   |
| P06753 TPM3_HUMAN Tropomyosin<br>alpha-3 chain | 6  |                      | LDKENALDR                         | 12  | 9  | 5  | 38.48  | b2y3°y3y4y5                                          | 1073.55 | 23.003  | 5152   | 2 | 537.28  | -7.28  |
| P06753 TPM3_HUMAN Tropomyosin<br>alpha-3 chain | 7  |                      | HIAEEADRK                         | 152 | 9  | 11 | 89.93  | b2b3b5y2y3y4y6°y6y7y<br>8y9                          | 1068.53 | 22.362  | 4032   | 3 | 356.85  | -10.74 |
| P06753 TPM3_HUMAN Tropomyosin<br>alpha-3 chain | 8  | Carbamidomethyl+C(1) | CSELEEELK                         | 189 | 9  | 4  | 38.48  | b3b4b5°b5                                            | 1136.54 | 93.079  | 131659 | 2 | 568.77  | 21.91  |
| P06753 TPM3_HUMAN Tropomyosin<br>alpha-3 chain | 9  |                      | ENALDR                            | 15  | 6  | 1  | 13.7   | b4                                                   | 717.35  | 65.232  | 10781  | 1 | 717.35  | -2.89  |
| P06753 TPM3_HUMAN Tropomyosin<br>alpha-3 chain | 10 |                      | QLEDELAAMQK                       | 37  | 11 | 5  | 37.02  | b5b6°b6b8y3                                          | 1275.61 | 42.643  | 6738   | 2 | 638.31  | -11.58 |
| P06753 TPM3_HUMAN Tropomyosin<br>alpha-3 chain | 11 |                      | SKQLEDELAAMQK                     | 35  | 13 | 3  | 28.31  | b7b8b10                                              | 1490.77 | 81.656  | 44442  | 2 | 745.89  | 12.12  |
| P06753 TPM3_HUMAN Tropomyosin<br>alpha-3 chain | 12 |                      | KLVIIEGDLER                       | 167 | 11 | 5  | 55.88  | b3b4y3y5y7                                           | 1284.75 | 58.028  | 33257  | 2 | 642.88  | -3.42  |
| P06753 TPM3_HUMAN Tropomyosin<br>alpha-3 chain | 13 |                      | ENALDRAEQAEAEQK                   | 15  | 15 | 3  | 26.39  | y6y9y14                                              | 1701.78 | 104.550 | 16763  | 3 | 567.93  | -13.41 |

|                                                   |    |                       |                             |     |    |    |        |                                                             |         |         |        |   |         |        |
|---------------------------------------------------|----|-----------------------|-----------------------------|-----|----|----|--------|-------------------------------------------------------------|---------|---------|--------|---|---------|--------|
| P06753 TPM3_HUMAN Tropomyosin alpha-3 chain       | 14 |                       | LEKTIDDLEDELYAQK            | 248 | 16 | 8  | 41.63  | b7b9b13°b13y7°y7y8                                          | 1922.94 | 72.817  | 12728  | 3 | 641.65  | -12.63 |
| P06753 TPM3_HUMAN Tropomyosin alpha-3 chain       | 15 |                       | AADAEAEVASLNRR              | 77  | 14 | 0  | 3.57   |                                                             | 1454.72 | 39.022  | 9856   | 3 | 485.58  | -3.86  |
| P07195 LDHB_HUMAN L-lactate dehydrogenase B chain | 1  | Carbamidomethyl+C(6)  | VIGSGCNLDSAR                | 158 | 12 | 11 | 95.89  | b2y1y3y4y5y6y8y9°y9y10y12                                   | 1248.60 | 36.371  | 72187  | 2 | 624.80  | 0.29   |
| P07195 LDHB_HUMAN L-lactate dehydrogenase B chain | 2  |                       | IVADKDYSVTANSK              | 77  | 14 | 6  | 39     | y5°y5y8y9°y9y12                                             | 1510.77 | 32.797  | 40505  | 3 | 504.26  | -6.46  |
| P07195 LDHB_HUMAN L-lactate dehydrogenase B chain | 3  |                       | LIAPVAEEEEATVPNNK           | 7   | 16 | 6  | 25.03  | b2y4y11*y11y14y16                                           | 1694.90 | 53.349  | 28881  | 2 | 847.95  | 3.39   |
| P07195 LDHB_HUMAN L-lactate dehydrogenase B chain | 4  |                       | GEMMDLQHGSFLQTPK            | 60  | 17 | 3  | 23.88  | b4b11b14                                                    | 1931.95 | 90.133  | 102184 | 2 | 966.48  | 9.54   |
| P07195 LDHB_HUMAN L-lactate dehydrogenase B chain | 5  |                       | MVVESAYEVIK                 | 233 | 11 | 5  | 38.6   | b4b8y7y8°y8                                                 | 1267.65 | 62.236  | 30591  | 2 | 634.33  | -5.59  |
| P07195 LDHB_HUMAN L-lactate dehydrogenase B chain | 6  |                       | SLADELALVDVLEDK             | 43  | 15 | 8  | 79.76  | b6b7y4y6°y6y8y11y13                                         | 1629.85 | 98.821  | 15558  | 2 | 815.43  | -5.69  |
| P07195 LDHB_HUMAN L-lactate dehydrogenase B chain | 7  | Carbamidomethyl+C(15) | GYMGIENEVFLSLPCLNAR         | 279 | 20 | 5  | 30.97  | b5b9b10b15°b15                                              | 2296.12 | 105.484 | 6033   | 2 | 1148.56 | -10.95 |
| P07195 LDHB_HUMAN L-lactate dehydrogenase B chain | 8  | Carbamidomethyl+C(5)  | YSPDCIIVVSNPVDILTYVTWK      | 127 | 23 | 5  | 35.74  | b11b12y5°y5y6                                               | 2695.36 | 131.358 | 1971   | 3 | 899.12  | -17.48 |
| P07195 LDHB_HUMAN L-lactate dehydrogenase B chain | 9  |                       | QQEGESR                     | 100 | 7  | 5  | 37.69  | b4*b4b5y6°y6                                                | 833.39  | 46.477  | 1872   | 1 | 833.39  | 13.99  |
| P07437 TBB5_HUMAN Tubulin beta chain              | 1  |                       | LAVNMVPPFR                  | 252 | 10 | 10 | 88.11  | b2b5°b5y4y5y6y7y8y9y10                                      | 1143.63 | 73.053  | 165955 | 2 | 572.32  | -2.99  |
| P07437 TBB5_HUMAN Tubulin beta chain              | 2  |                       | SGPFGQIFRPDNFVFGQSGAGNNWAK  | 77  | 26 | 19 | 104.86 | b2°b2b3b5b7°b7b13b14*b14b15b16y1y4y6y9y12y14y18y26          | 2798.37 | 90.282  | 157550 | 3 | 933.46  | 8.55   |
| P07437 TBB5_HUMAN Tubulin beta chain              | 3  | Carbamidomethyl+C(23) | LTTPTYGDLNHLVSATMSGVTTCLR   | 216 | 25 | 10 | 75.02  | y2y3y5y6y7y8y12y13y22y25                                    | 2708.34 | 96.113  | 91949  | 3 | 903.45  | 0.45   |
| P07437 TBB5_HUMAN Tubulin beta chain              | 4  |                       | ALTVPELTQQVFDK              | 282 | 15 | 4  | 18.31  | b3y4y11y15                                                  | 1659.90 | 84.745  | 90571  | 2 | 830.45  | 1.62   |
| P07437 TBB5_HUMAN Tubulin beta chain              | 5  |                       | IMNTFSVVPSPK                | 162 | 12 | 5  | 34.53  | b3y4y7y8y12                                                 | 1319.70 | 64.056  | 73068  | 2 | 660.35  | -1.39  |
| P07437 TBB5_HUMAN Tubulin beta chain              | 6  |                       | NSSYFVEWIPNNVK              | 336 | 14 | 13 | 70.45  | b1*b1b2b8b9°b9b10y6y8y11y12*y12y14                          | 1696.85 | 81.608  | 69008  | 2 | 848.93  | 7.63   |
| P07437 TBB5_HUMAN Tubulin beta chain              | 7  |                       | ISVYYNEATGGK                | 46  | 12 | 15 | 98.4   | b6°b6*b6b7y1y2y3y4y7*y7y8°y8y9y10y12                        | 1301.64 | 45.520  | 43489  | 2 | 651.32  | 1.88   |
| P07437 TBB5_HUMAN Tubulin beta chain              | 8  |                       | MAVTFIGNSTAIQELFKR          | 362 | 18 | 9  | 42.38  | b3b7b14y1y2y4y12*y12y13                                     | 2026.07 | 91.627  | 40895  | 3 | 676.03  | -3.43  |
| P07437 TBB5_HUMAN Tubulin beta chain              | 9  |                       | GHYTEGAELVDSVLDVVRK         | 103 | 19 | 4  | 23.88  | b5b12b14y4                                                  | 2087.07 | 87.643  | 31973  | 3 | 696.36  | -1.99  |
| P07437 TBB5_HUMAN Tubulin beta chain              | 10 | Carbamidomethyl+C(10) | EIVHIQAGCQGNQIGAK           | 2   | 17 | 4  | 16.47  | b12y2y3y8                                                   | 1822.93 | 44.237  | 10446  | 2 | 911.97  | 2.41   |
| P07437 TBB5_HUMAN Tubulin beta chain              | 11 |                       | FWEVISDEHGIDPTGTYHGSDSLQLDR | 19  | 27 | 7  | 17.95  | b3b5b11°b11y2y8*y8                                          | 3102.45 | 120.876 | 7084   | 4 | 776.37  | 14.87  |
| P07437 TBB5_HUMAN Tubulin beta chain              | 12 |                       | MAVTFIGNSTAIQELFK           | 362 | 17 | 7  | 49.02  | b3b4b5b7°b7b14°b14                                          | 1869.98 | 116.750 | 3412   | 3 | 624.00  | 1.11   |
| P07437 TBB5_HUMAN Tubulin beta chain              | 13 |                       | MAVTFIGNSTAIQELF            | 362 | 16 | 0  | 5.16   |                                                             | 1741.87 | 91.688  | 8109   | 2 | 871.44  | -10.09 |
| P07437 TBB5_HUMAN Tubulin beta chain              | 14 |                       | MAVTFIGNSTAIQELFK           | 362 | 17 | 0  | 4.76   |                                                             | 1851.98 | 116.769 | 3296   | 3 | 618.00  | 11.34  |
| P07737 PROF1_HUMAN Profilin-1                     | 1  |                       | TFVNITPAEVGLVVGK            | 38  | 16 | 23 | 129.98 | b1b2°b2b3b4°b4*b4b5°b5*b5b6°b6*b6b14y2y3y6y7y10y11y12y13y16 | 1643.94 | 86.385  | 379313 | 2 | 822.47  | 1.71   |

|                                             |    |                                             |                                          |     |    |    |        |                                                    |         |         |        |   |         |        |
|---------------------------------------------|----|---------------------------------------------|------------------------------------------|-----|----|----|--------|----------------------------------------------------|---------|---------|--------|---|---------|--------|
| P07737 PROF1_HUMAN Profilin-1               | 2  |                                             | TFVNITPAEVLVVGKDR                        | 38  | 18 | 16 | 123.29 | b2°b2b3°b3b4b5°b5y5y6y8y9y13y14y15y16y18           | 1915.05 | 80.563  | 293726 | 3 | 639.02  | -7.97  |
| P07737 PROF1_HUMAN Profilin-1               | 3  |                                             | STGGAPTFNVTVTK                           | 91  | 14 | 12 | 72.88  | b2°b2b4b5°b5y1y3y4y9y10y12y14                      | 1379.72 | 52.579  | 288172 | 2 | 690.36  | 0.35   |
| P07737 PROF1_HUMAN Profilin-1               | 4  |                                             | SSFYVNGLTGGQK                            | 56  | 14 | 20 | 176.79 | b3°b3b4°b4b5b6b9y3y4*y4y5y6y7y8y9y10y11*y11y14*y14 | 1470.76 | 67.892  | 283655 | 2 | 735.88  | 0.33   |
| P07737 PROF1_HUMAN Profilin-1               | 5  |                                             | TLVLLMGK                                 | 108 | 8  | 5  | 54.4   | y3y4y5y6y8                                         | 874.53  | 69.516  | 209319 | 2 | 437.77  | -14.31 |
| P07737 PROF1_HUMAN Profilin-1               | 6  |                                             | DSPSVWAAVPGK                             | 26  | 12 | 12 | 112.5  | b8b9b10y1y2y3y4y5y6y7y10y12                        | 1213.62 | 59.433  | 166046 | 2 | 607.31  | 0.50   |
| P07737 PROF1_HUMAN Profilin-1               | 7  |                                             | EGVHGGLINKK                              | 116 | 11 | 8  | 48.1   | b7°b7b9b10y1y2y3y8                                 | 1151.65 | 23.856  | 21251  | 2 | 576.33  | -4.13  |
| P07737 PROF1_HUMAN Profilin-1               | 8  | Carbamidomethyl+C(16)                       | AGWNAYIDNLMADGTCQDAIV<br>GYK             | 1   | 25 | 9  | 51.85  | b12°b12°b12b13b14b17y10y12y13                      | 2717.25 | 96.449  | 4273   | 2 | 1359.13 | 5.39   |
| P07737 PROF1_HUMAN Profilin-1               | 9  |                                             | DSLLQDGEFSMDLR                           | 75  | 14 | 4  | 27.84  | b3b13y5y7                                          | 1625.76 | 54.924  | 4251   | 2 | 813.38  | 6.08   |
| P07737 PROF1_HUMAN Profilin-1               | 10 | Carbamidomethyl+C(16);<br>Phosphoryl STY(6) | AGWNAYIDNLMADGTCQDAIV<br>GYKDSPSVWAAVPGK | 1   | 37 | 12 | 74.64  | b3y3y5y7y12y15y16y23y24y30y31°y31                  | 3991.79 | 105.482 | 437718 | 4 | 998.70  | -0.67  |
| P07737 PROF1_HUMAN Profilin-1               | 11 | Carbamidomethyl+C(1);<br>Oxidation+M(16)    | CSVIRDSLLQDGEFSMDLR                      | 70  | 19 | 4  | 26.1   | b10y5y12y13                                        | 2257.08 | 62.316  | 70813  | 3 | 753.03  | 7.90   |
| P07737 PROF1_HUMAN Profilin-1               | 12 | Oxidation+M(11)                             | DSLLQDGEFSMDLR                           | 75  | 14 | 3  | 24.9   | b6b7y12                                            | 1641.76 | 96.617  | 19511  | 2 | 821.38  | 11.75  |
| P07737 PROF1_HUMAN Profilin-1               | 13 |                                             | GVHGGLINKK                               | 117 | 10 | 0  | 2.38   |                                                    | 1022.60 | 23.860  | 7575   | 3 | 341.54  | -12.06 |
| P07737 PROF1_HUMAN Profilin-1               | 14 |                                             | TFVNITPAE                                | 38  | 9  | 1  | 7.25   | y5                                                 | 991.52  | 86.341  | 4659   | 2 | 496.26  | 9.91   |
| P07737 PROF1_HUMAN Profilin-1               | 15 |                                             | HGGLINKK                                 | 119 | 8  | 0  | 2.38   |                                                    | 866.51  | 23.845  | 2539   | 2 | 433.76  | -8.88  |
| P07737 PROF1_HUMAN Profilin-1               | 16 |                                             | EGVHGGLINKK                              | 116 | 11 | 0  | 2.38   |                                                    | 1133.62 | 23.840  | 30226  | 3 | 378.55  | -11.63 |
| P07951 TPM2_HUMAN Tropomyosin<br>beta chain | 1  |                                             | IQLVEELDR                                | 91  | 10 | 19 | 127.22 | b2°b2b3b4b7y1y2y3y4y5°y5y6y7°y7y8y9°y9*y9y10       | 1243.66 | 59.697  | 442286 | 2 | 622.33  | 1.77   |
| P07951 TPM2_HUMAN Tropomyosin<br>beta chain | 2  |                                             | LATALQK                                  | 105 | 7  | 8  | 64.29  | b4°b4y3y4y5y6°y6y7                                 | 744.45  | 28.993  | 31476  | 2 | 372.73  | -13.77 |
| P07951 TPM2_HUMAN Tropomyosin<br>beta chain | 3  |                                             | LEQAEK                                   | 70  | 6  | 1  | 13.7   | b3                                                 | 717.39  | 28.124  | 10402  | 2 | 359.20  | 10.12  |
| P07951 TPM2_HUMAN Tropomyosin<br>beta chain | 4  |                                             | QLEEEQALQKK                              | 37  | 12 | 3  | 29.67  | b4b7b8                                             | 1471.78 | 46.422  | 31075  | 2 | 736.40  | 5.14   |
| P07951 TPM2_HUMAN Tropomyosin<br>beta chain | 5  | Carbamidomethyl+C(8)                        | AEVAESKCGDLEELK                          | 182 | 16 | 4  | 17.33  | b12y9y11°y11                                       | 1806.82 | 48.087  | 10654  | 2 | 903.91  | -11.96 |
| P07951 TPM2_HUMAN Tropomyosin<br>beta chain | 6  | Carbamidomethyl+C(1)                        | CKQLEEEQALQK                             | 35  | 13 | 3  | 25.6   | b4b5y7                                             | 1631.82 | 69.797  | 4960   | 2 | 816.41  | 8.53   |
| P07951 TPM2_HUMAN Tropomyosin<br>beta chain | 7  |                                             | KATDAEADVASLNR                           | 76  | 14 | 3  | 19.46  | b3y3y12                                            | 1460.75 | 38.906  | 3267   | 3 | 487.59  | 10.86  |
| P07951 TPM2_HUMAN Tropomyosin<br>beta chain | 8  |                                             | TIDDLEDEVYAQKMK                          | 251 | 15 | 6  | 26.05  | b11b13y11°y11*y11y14                               | 1797.88 | 136.775 | 1771   | 1 | 1797.88 | 10.18  |
| P07996 TSP1_HUMAN Thrombospondin-<br>1      | 1  |                                             | FVFGTTPEDILR                             | 216 | 12 | 17 | 122.79 | b2b3b5°b5b6°b6b12y1y3y4y6y7y8y9y10°y10y12          | 1394.73 | 83.171  | 371733 | 2 | 697.87  | -4.64  |
| P07996 TSP1_HUMAN Thrombospondin-<br>1      | 2  |                                             | TIVTTLQDSIR                              | 288 | 11 | 13 | 101.02 | b1b2°b2b3°b3y3y4y5y6y7y8y9y11                      | 1246.69 | 68.492  | 297660 | 2 | 623.85  | -4.21  |

|                                    |    |                                                                          |                           |      |    |    |        |                                                                      |         |         |        |   |         |        |
|------------------------------------|----|--------------------------------------------------------------------------|---------------------------|------|----|----|--------|----------------------------------------------------------------------|---------|---------|--------|---|---------|--------|
| P07996 TSP1_HUMAN Thrombospondin-1 | 3  |                                                                          | FTGSQPFQGVVEHATANK        | 623  | 18 | 25 | 165.45 | b2°b2b3b4°b4b5b8b10b13y1y2y3y4y6y7*y7y9y11y12*y12y13°y13*y13y16y18   | 1875.88 | 45.520  | 254775 | 3 | 625.97  | -7.35  |
| P07996 TSP1_HUMAN Thrombospondin-1 | 4  |                                                                          | GPDSSPAFR                 | 50   | 10 | 16 | 135.01 | b2b3°b3b6b9y2y3y4y5y6°y6y7°y7y8y9y10                                 | 1030.49 | 36.845  | 220674 | 2 | 515.75  | -2.72  |
| P07996 TSP1_HUMAN Thrombospondin-1 | 5  |                                                                          | AQGYSGLSVK                | 1054 | 10 | 10 | 74.81  | b2°b2b3y2y3y4y6y7y8y10                                               | 1009.53 | 39.705  | 198447 | 2 | 505.27  | -6.17  |
| P07996 TSP1_HUMAN Thrombospondin-1 | 6  |                                                                          | GGVNDNFQGVLQNVNR          | 201  | 15 | 21 | 168.62 | b2b5b6b7°b7b10b11b12b13y2y3*y3y4*y4y6y7y9y10y11y15*y15               | 1616.82 | 66.754  | 194840 | 2 | 808.91  | 2.04   |
| P07996 TSP1_HUMAN Thrombospondin-1 | 7  |                                                                          | MENAELDVPIQSVFTR          | 173  | 16 | 20 | 184.36 | b2b3b4b6b7b8°b8b11°b11b12b14b15y1y3y5y6y8y10y11y16                   | 1848.93 | 82.326  | 183215 | 2 | 924.97  | 5.35   |
| P07996 TSP1_HUMAN Thrombospondin-1 | 8  |                                                                          | GTSQNDPNWVVR              | 968  | 12 | 7  | 50.05  | b6y2y3y4y6y10°y10                                                    | 1372.67 | 48.240  | 151333 | 2 | 686.84  | 3.82   |
| P07996 TSP1_HUMAN Thrombospondin-1 | 9  |                                                                          | NALWHTGNTPGQVR            | 1077 | 14 | 6  | 45.02  | y4y5*y5y9y10y14                                                      | 1550.76 | 46.096  | 133004 | 3 | 517.59  | -12.52 |
| P07996 TSP1_HUMAN Thrombospondin-1 | 10 | Carbamidomethyl+C(2);<br>Carbamidomethyl+C(14)                           | LCNSPSPQMNGKPCGEAR        | 460  | 19 | 25 | 194.17 | b2b3b4°b4b11b19y2y4y5y6y7y8°y8y9y10°y10*y10y11*y11y13y15y16y17y18y19 | 2131.92 | 32.021  | 131284 | 3 | 711.31  | -7.21  |
| P07996 TSP1_HUMAN Thrombospondin-1 | 11 | Carbamidomethyl+C(5)                                                     | RPPLCYHNGVQYR             | 313  | 13 | 9  | 55.21  | b2b4b5b8°b8y4y6y8y13                                                 | 1659.80 | 37.336  | 102088 | 3 | 553.94  | -8.16  |
| P07996 TSP1_HUMAN Thrombospondin-1 | 12 | Carbamidomethyl+C(3)                                                     | DNCQYVYNVDQR              | 810  | 12 | 9  | 69.37  | b3y1y2y3y5y6y7y9y12                                                  | 1573.68 | 44.710  | 85476  | 2 | 787.34  | 4.34   |
| P07996 TSP1_HUMAN Thrombospondin-1 | 13 |                                                                          | GFLLLASLR                 | 86   | 9  | 8  | 62.08  | b2b3y2y4y5y6y7y9                                                     | 989.61  | 90.886  | 74316  | 2 | 495.31  | -4.38  |
| P07996 TSP1_HUMAN Thrombospondin-1 | 14 |                                                                          | GTLLALER                  | 101  | 8  | 7  | 54.4   | y2°y2y3y4y5y6y8                                                      | 872.52  | 57.373  | 58411  | 2 | 436.76  | -4.83  |
| P07996 TSP1_HUMAN Thrombospondin-1 | 15 |                                                                          | IPESGGDNSVDFIFELTGAAR     | 20   | 21 | 9  | 63.33  | b3°b3y1y3y4y5y6y7y21                                                 | 2195.08 | 100.246 | 52827  | 2 | 1098.04 | 8.01   |
| P07996 TSP1_HUMAN Thrombospondin-1 | 16 |                                                                          | QVTQSYWDTNPTR             | 1041 | 13 | 11 | 91.6   | b3b12°b12y5y7y9y10y11°y11y12y13                                      | 1595.75 | 50.015  | 42082  | 2 | 798.38  | 4.51   |
| P07996 TSP1_HUMAN Thrombospondin-1 | 17 | Carbamidomethyl+C(2)                                                     | LCNNPTQFGGK               | 517  | 12 | 9  | 70.83  | b2b6b9y2y3y6y8y10y12                                                 | 1332.64 | 40.457  | 39209  | 2 | 666.82  | 2.02   |
| P07996 TSP1_HUMAN Thrombospondin-1 | 18 | Carbamidomethyl+C(2);<br>Carbamidomethyl+C(14);<br>Carbamidomethyl+C(24) | LCNNPTQFGGKDCVGDVTENQICNK | 517  | 26 | 9  | 46.97  | b4b9b12y3y7y11y20y22y26                                              | 2965.32 | 53.345  | 24560  | 3 | 989.11  | 0.25   |
| P07996 TSP1_HUMAN Thrombospondin-1 | 19 | Carbamidomethyl+C(2);<br>Carbamidomethyl+C(7)                            | TCHIQCCKR                 | 421  | 10 | 13 | 102.38 | b3°b3b4y2y3y4y5°y5y6*y6y7y8y10                                       | 1346.58 | 14.905  | 21988  | 3 | 449.53  | -10.52 |
| P07996 TSP1_HUMAN Thrombospondin-1 | 20 | Carbamidomethyl+C(8)                                                     | IPDDRDNCPFHYNPAQYDYDR     | 746  | 21 | 5  | 21.91  | b10y6y10°y10y12                                                      | 2671.16 | 47.944  | 19507  | 4 | 668.54  | 10.79  |
| P07996 TSP1_HUMAN Thrombospondin-1 | 21 | Carbamidomethyl+C(6)                                                     | EVPDACFNHNGEHR            | 593  | 14 | 6  | 19.46  | b11°b11y2y4y10*y10                                                   | 1681.71 | 30.867  | 18972  | 3 | 561.24  | -3.41  |
| P07996 TSP1_HUMAN Thrombospondin-1 | 22 |                                                                          | IEDANLIPPVDDK             | 60   | 14 | 6  | 33.28  | b6b12y3°y3y4y14                                                      | 1535.78 | 62.953  | 12756  | 2 | 768.39  | -8.98  |
| P07996 TSP1_HUMAN Thrombospondin-1 | 23 |                                                                          | FQMIPLDPK                 | 959  | 9  | 3  | 38.48  | b3b4b5                                                               | 1088.59 | 55.773  | 9741   | 2 | 544.80  | 5.38   |
| P07996 TSP1_HUMAN Thrombospondin-1 | 24 | Carbamidomethyl+C(2);<br>Carbamidomethyl+C(12)                           | DCVGDVTENQICNK            | 529  | 14 | 7  | 27.25  | b2y4*y4y5*y5y7y14                                                    | 1651.71 | 46.370  | 8117   | 2 | 826.36  | 4.66   |

|                                    |    |                                                                                                             |                                       |      |    |    |        |                                                    |         |         |        |   |         |        |
|------------------------------------|----|-------------------------------------------------------------------------------------------------------------|---------------------------------------|------|----|----|--------|----------------------------------------------------|---------|---------|--------|---|---------|--------|
| P07996 TSP1_HUMAN Thrombospondin-1 | 25 | Carbamidomethyl+C(11);Carbamidomethyl+C(14)                                                                 | DTDMDGVGDQCDNCPLEHNPDQLSDSDR          | 822  | 29 | 5  | 26.22  | b15y3y9y10y26                                      | 3320.28 | 53.139  | 89478  | 3 | 1107.43 | 3.24   |
| P07996 TSP1_HUMAN Thrombospondin-1 | 26 | Carbamidomethyl+C(1);Carbamidomethyl+C(10);Carbamidomethyl+C(13)                                            | CENTDPGYNCLPCPPR                      | 607  | 16 | 6  | 45.69  | b5b11b13y5y9y11                                    | 1949.80 | 50.858  | 62492  | 2 | 975.41  | 5.07   |
| P07996 TSP1_HUMAN Thrombospondin-1 | 27 | Carbamidomethyl+C(6);Carbamidomethyl+C(10)                                                                  | DLQAICGISCDELSSMVLELR                 | 264  | 21 | 5  | 41.9   | b4y4y5y7y8                                         | 2409.14 | 102.938 | 62405  | 3 | 803.72  | -3.04  |
| P07996 TSP1_HUMAN Thrombospondin-1 | 28 | Carbamidomethyl+C(1)                                                                                        | CNYLGHYSDPMYR                         | 662  | 13 | 3  | 20.83  | b9y4y6                                             | 1675.68 | 54.252  | 56831  | 3 | 559.23  | -10.05 |
| P07996 TSP1_HUMAN Thrombospondin-1 | 29 |                                                                                                             | FYVVMWK                               | 1034 | 7  | 3  | 40.7   | b3b6y5                                             | 972.50  | 77.316  | 37161  | 2 | 486.75  | -4.08  |
| P07996 TSP1_HUMAN Thrombospondin-1 | 30 |                                                                                                             | DFTAYR                                | 1103 | 6  | 2  | 13.7   | y4*y4                                              | 772.36  | 39.941  | 17176  | 1 | 772.36  | -3.64  |
| P07996 TSP1_HUMAN Thrombospondin-1 | 31 | Carbamidomethyl+C(1);Carbamidomethyl+C(4);Carbamidomethyl+C(24)                                             | CDNCPYNHNPDQADTDNNGEGDACAADIDGDGILNER | 773  | 37 | 3  | 10.88  | b4y11y13                                           | 4092.63 | 58.152  | 16498  | 3 | 1364.88 | 10.92  |
| P07996 TSP1_HUMAN Thrombospondin-1 | 32 |                                                                                                             | IMADSGPIYDK                           | 1130 | 11 | 4  | 41.79  | b9y3y6y8                                           | 1209.61 | 26.996  | 15559  | 3 | 403.87  | 20.18  |
| P07996 TSP1_HUMAN Thrombospondin-1 | 33 |                                                                                                             | LGLFVFSQEMVFFSDLK                     | 1147 | 17 | 5  | 30.15  | b9b10*b10y6y11                                     | 2007.03 | 95.405  | 11118  | 2 | 1004.02 | 0.12   |
| P07996 TSP1_HUMAN Thrombospondin-1 | 34 | Carbamidomethyl+C(2)                                                                                        | GCSSSTSVLLTLDNNVVGSSPAIR              | 230  | 25 | 4  | 12.5   | b12b14*b14y8                                       | 2548.27 | 129.140 | 5090   | 3 | 850.09  | 0.29   |
| P07996 TSP1_HUMAN Thrombospondin-1 | 35 |                                                                                                             | DHSGQVFSVVSNGK                        | 110  | 14 | 3  | 19.46  | b13y3y8                                            | 1460.71 | 44.128  | 2751   | 3 | 487.57  | -2.09  |
| P07996 TSP1_HUMAN Thrombospondin-1 | 36 |                                                                                                             | QHVVSVEEALLATGQWK                     | 137  | 17 | 9  | 53.78  | b8*b8b9*b9b10y4y11y13*y13                          | 1894.98 | 117.923 | 2473   | 2 | 947.99  | -10.76 |
| P07996 TSP1_HUMAN Thrombospondin-1 | 37 | Carbamidomethyl+C(15)                                                                                       | DDFDHDSVPDIDDICPENVDISETDFR           | 931  | 27 | 5  | 11.99  | b14y3*y3y12*y12                                    | 3180.36 | 68.315  | 2291   | 3 | 1060.79 | 11.05  |
| P07996 TSP1_HUMAN Thrombospondin-1 | 38 |                                                                                                             | IEDANLIPPVPDDKFQDLVDAVR               | 60   | 23 | 20 | 175.12 | b4b5*b5b6*b6b7*b7b10y3y4y5y6y7*y7y9y10y11y14y15y16 | 2579.34 | 89.006  | 346525 | 3 | 860.45  | 1.14   |
| P07996 TSP1_HUMAN Thrombospondin-1 | 39 |                                                                                                             | VTEENKELANELR                         | 300  | 13 | 8  | 67.55  | b3b5b10*b10b12y3y4*y4                              | 1544.79 | 91.750  | 174907 | 2 | 772.90  | -0.95  |
| P07996 TSP1_HUMAN Thrombospondin-1 | 40 | Carbamidomethyl+C(4);Carbamidomethyl+C(16)                                                                  | IRLCNSPSPQMNGKPCGEAR                  | 458  | 21 | 10 | 58.05  | b5b10*b10y6y7y9*y9y10y11*y11                       | 2401.11 | 38.774  | 76254  | 4 | 601.03  | -2.24  |
| P07996 TSP1_HUMAN Thrombospondin-1 | 41 | Carbamidomethyl+C(1);Carbamidomethyl+C(4);Carbamidomethyl+C(15);Carbamidomethyl+C(21);Carbamidomethyl+C(28) | CGACPPGYSGNGIQCTDVDECKEVPDACFNHNGEHR  | 571  | 36 | 4  | 21.5   | b3b4b11y12                                         | 4107.61 | 50.234  | 73666  | 5 | 822.33  | -9.63  |
| P07996 TSP1_HUMAN Thrombospondin-1 | 42 |                                                                                                             | LVPNPQKQSDGDGR                        | 911  | 15 | 8  | 38.09  | b13b14*b14*b14y10y11*y11*y11                       | 1612.73 | 63.862  | 13766  | 3 | 538.25  | -13.25 |
| P07996 TSP1_HUMAN Thrombospondin-1 | 43 | Carbamidomethyl+C(2);Carbamidomethyl+C(9)                                                                   | SCDSLNNRCEGSSVQTR                     | 404  | 17 | 4  | 25.13  | y8y9*y9y14                                         | 1969.86 | 90.132  | 4825   | 4 | 493.22  | 5.76   |

|                                                |    |                                                                                                                              |                                          |      |    |    |       |                                             |         |         |       |   |         |        |
|------------------------------------------------|----|------------------------------------------------------------------------------------------------------------------------------|------------------------------------------|------|----|----|-------|---------------------------------------------|---------|---------|-------|---|---------|--------|
| P07996 TSP1_HUMAN Thrombospondin-1             | 44 | Carbamidomethyl+C(5);<br>Carbamidomethyl+C(23);<br>Carbamidomethyl+C(26);<br>Carbamidomethyl+C(28);<br>Carbamidomethyl+C(35) | RPPLCYHNGVQYRNNEEWTVDSC<br>TECHCQNSVTICK | 313  | 36 | 4  | 12.74 | b7b12y7y9                                   | 4512.00 | 84.517  | 3059  | 4 | 1128.75 | 11.90  |
| P07996 TSP1_HUMAN Thrombospondin-1             | 45 | Carbamidomethyl+C(4)                                                                                                         | SRLCENNTPQFGGK                           | 515  | 14 | 4  | 19.46 | b6y6*y6y8                                   | 1575.79 | 75.310  | 3055  | 3 | 525.93  | 11.47  |
| P07996 TSP1_HUMAN Thrombospondin-1             | 46 |                                                                                                                              | QVTQSYWDTNPTRAQGYGLSV<br>K               | 1041 | 23 | 13 | 64.93 | b3b7°b7*b7b9b10b12°b<br>12b13°b13*b13y13y14 | 2586.24 | 118.867 | 2967  | 3 | 862.75  | -7.08  |
| P07996 TSP1_HUMAN Thrombospondin-1             | 47 |                                                                                                                              | IMADSGPIYDKTYAGGR                        | 1130 | 17 | 6  | 53.78 | b11b12b13y10y13y15                          | 1814.85 | 136.698 | 2316  | 1 | 1814.85 | -11.50 |
| P07996 TSP1_HUMAN Thrombospondin-1             | 48 | Phosphoryl STY(10)                                                                                                           | LVPNPQKDSGDGDR                           | 911  | 15 | 4  | 38.15 | b3y3y4y5                                    | 1692.69 | 107.148 | 3206  | 2 | 846.85  | -11.18 |
| P07996 TSP1_HUMAN Thrombospondin-1             | 49 | Carbamidomethyl+C(15);<br>Oxidation+M(12)                                                                                    | GLAWGLGVFLMHVCGTNR                       | 1    | 19 | 4  | 22.86 | b3b4y6°y6                                   | 2117.06 | 115.484 | 6528  | 2 | 1059.04 | -6.69  |
| P07996 TSP1_HUMAN Thrombospondin-1             | 50 | Carbamidomethyl+C(4)                                                                                                         | PDACFNHNGEHR                             | 595  | 12 | 1  | 7.33  | b10                                         | 1453.59 | 30.894  | 18717 | 3 | 485.20  | -7.73  |
| P07996 TSP1_HUMAN Thrombospondin-1             | 51 | Carbamidomethyl+C(5)                                                                                                         | RPPLCYHNGVQ                              | 313  | 11 | 0  | 3.17  |                                             | 1340.67 | 37.290  | 5291  | 3 | 447.56  | 11.38  |
| P07996 TSP1_HUMAN Thrombospondin-1             | 52 | Carbamidomethyl+C(1);<br>Carbamidomethyl+C(6)                                                                                | CHIQECDKR                                | 422  | 9  | 2  | 22.57 | b3b4                                        | 1245.53 | 14.902  | 3761  | 3 | 415.85  | -13.43 |
| P07996 TSP1_HUMAN Thrombospondin-1             | 53 |                                                                                                                              | LLLASLR                                  | 88   | 7  | 0  | 1.59  |                                             | 785.52  | 90.896  | 2575  | 2 | 393.26  | -8.86  |
| P07996 TSP1_HUMAN Thrombospondin-1             | 54 |                                                                                                                              | NALWHTGN                                 | 1077 | 8  | 0  | 3.57  |                                             | 912.44  | 46.116  | 2227  | 2 | 456.73  | 13.65  |
| P07996 TSP1_HUMAN Thrombospondin-1             | 55 |                                                                                                                              | GTLLALER                                 | 101  | 8  | 0  | 1.19  |                                             | 854.50  | 57.374  | 7922  | 2 | 427.75  | -5.29  |
| P07996 TSP1_HUMAN Thrombospondin-1             | 56 | Carbamidomethyl+C(6)                                                                                                         | EVPDACFNHNGEHR                           | 593  | 14 | 0  | 3.57  |                                             | 1663.70 | 30.856  | 2469  | 3 | 555.24  | -0.95  |
| P08107 HSP71_HUMAN Heat shock 70 kDa protein 1 | 1  |                                                                                                                              | VEIANDQGNR                               | 25   | 11 | 8  | 64.41 | b2b3b7y4y6y7y8y11                           | 1228.62 | 36.891  | 58804 | 2 | 614.82  | -2.58  |
| P08107 HSP71_HUMAN Heat shock 70 kDa protein 1 | 2  |                                                                                                                              | TTPSYVAFTDTER                            | 36   | 13 | 10 | 62.78 | b1°b1b5b9y3y6y9y11°y<br>11y13               | 1487.71 | 55.692  | 51609 | 2 | 744.36  | 2.71   |
| P08107 HSP71_HUMAN Heat shock 70 kDa protein 1 | 3  |                                                                                                                              | SINPDEAVAYGAAVQAAILMGDK                  | 361  | 23 | 6  | 23.25 | b9b13b14°b14b16°y23                         | 2304.15 | 77.541  | 28094 | 2 | 1152.58 | 0.32   |
| P08107 HSP71_HUMAN Heat shock 70 kDa protein 1 | 4  | Carbamidomethyl+C(6)                                                                                                         | ELEQVCNPIISGLYQGAGGPGPGG<br>FGAQQGPK     | 597  | 31 | 4  | 13.98 | b7b11y17y26                                 | 3055.43 | 93.935  | 20313 | 3 | 1019.15 | -20.93 |
| P08107 HSP71_HUMAN Heat shock 70 kDa protein 1 | 5  | Carbamidomethyl+C(14)                                                                                                        | AAAIGIDLGTTYSCVGVFQHGK                   | 3    | 22 | 4  | 13.56 | b12°b12b20y14                               | 2265.10 | 77.508  | 12259 | 3 | 755.71  | -13.58 |
| P08107 HSP71_HUMAN Heat shock 70 kDa protein 1 | 6  | Carbamidomethyl+C(1)                                                                                                         | CQEVISWLDANTLAEK                         | 573  | 16 | 6  | 38.21 | b5b8°b8b12b13y11                            | 1876.93 | 121.858 | 5681  | 2 | 938.97  | 11.97  |
| P08107 HSP71_HUMAN Heat shock 70 kDa protein 1 | 7  |                                                                                                                              | NQVALNPQNTVFDK                           | 56   | 15 | 4  | 29.7  | b5b10b14y12                                 | 1658.85 | 95.746  | 3902  | 2 | 829.93  | 2.43   |
| P08107 HSP71_HUMAN Heat shock 70 kDa protein 1 | 8  |                                                                                                                              | GGSGSGPTIEEVD                            | 628  | 13 | 3  | 25.6  | b6b7y5                                      | 1204.51 | 20.661  | 3355  | 3 | 402.17  | -18.75 |
| P08107 HSP71_HUMAN Heat shock 70 kDa protein 1 | 9  |                                                                                                                              | VSAKNALESYAFNMK                          | 535  | 15 | 4  | 18.31 | b3y11y13°y13                                | 1672.81 | 60.600  | 27899 | 2 | 836.91  | -13.06 |
| P08107 HSP71_HUMAN Heat shock 70 kDa protein 1 | 10 |                                                                                                                              | ATAGDTHLGGEDFDNRLVNHFE<br>EFK            | 220  | 26 | 3  | 12.23 | b5y10y12                                    | 2918.41 | 110.511 | 13813 | 5 | 584.49  | 12.55  |
| P08107 HSP71_HUMAN Heat shock 70 kDa protein 1 | 11 |                                                                                                                              | FGDPVVQSDMKHWPQVINDGD<br>KPK             | 77   | 25 | 3  | 12.5  | b10b20y7                                    | 2884.44 | 59.946  | 4974  | 4 | 721.87  | 12.27  |
| P08107 HSP71_HUMAN Heat shock 70 kDa protein 1 | 12 |                                                                                                                              | DLNKSINPDEAVAYGAAVQAAIL<br>MGDK          | 357  | 27 | 4  | 22.84 | b9b10b15*b15                                | 2774.36 | 80.380  | 3736  | 4 | 694.35  | -14.26 |

|                                                |    |                                                |                                      |     |    |    |        |                                                                                                                                                                  |         |         |        |   |         |        |
|------------------------------------------------|----|------------------------------------------------|--------------------------------------|-----|----|----|--------|------------------------------------------------------------------------------------------------------------------------------------------------------------------|---------|---------|--------|---|---------|--------|
| P08107 HSP71_HUMAN Heat shock 70 kDa protein 1 | 13 | Carbamidomethyl+C(14)                          | AAAIGIDLGTTYSVGVFQHGKVE<br>IIANDQGNR | 3   | 33 | 5  | 18.02  | b7b16y8y10y14                                                                                                                                                    | 3474.70 | 126.826 | 2397   | 3 | 1158.90 | -13.14 |
| P08107 HSP71_HUMAN Heat shock 70 kDa protein 1 | 14 |                                                | NALESYAFNMKSAVEDEGLK                 | 539 | 20 | 8  | 39.27  | b3b6b14y5°y5y11y12*y12                                                                                                                                           | 2216.02 | 111.334 | 1588   | 3 | 739.35  | -13.11 |
| P08107 HSP71_HUMAN Heat shock 70 kDa protein 1 | 15 | Phosphoryl STY(14)                             | TLSSSTQASLEIDSLFEGIDFYTSIT<br>R      | 272 | 27 | 4  | 15.5   | b13b15_H3PO4<br>b15y9y12                                                                                                                                         | 3061.46 | 118.898 | 21989  | 3 | 1021.16 | 12.92  |
| P08107 HSP71_HUMAN Heat shock 70 kDa protein 1 | 16 | Carbamidomethyl+C(1);<br>Phosphoryl STY(6)     | CQEVISWLDANTLAEK                     | 573 | 16 | 5  | 27.92  | b5y3y9y11_HPO3<br>y11*y11                                                                                                                                        | 1956.84 | 60.487  | 21806  | 3 | 652.95  | -12.60 |
| P08107 HSP71_HUMAN Heat shock 70 kDa protein 1 | 17 | Oxidation+M()                                  | NALESYAFNMK                          | 539 | 11 | 4  | 24.51  | b9°b9y3y10                                                                                                                                                       | 1303.61 | 77.314  | 8594   | 1 | 1303.61 | 11.14  |
| P08107 HSP71_HUMAN Heat shock 70 kDa protein 1 | 18 | Oxidation+M()                                  | AFYPEEISSMVLTK                       | 112 | 14 | 3  | 19.46  | b3b7y11                                                                                                                                                          | 1630.80 | 112.893 | 2515   | 2 | 815.91  | -0.07  |
| P08107 HSP71_HUMAN Heat shock 70 kDa protein 1 | 19 | Oxidation+M(10)                                | FGDPVVQSDMK                          | 77  | 11 | 5  | 37.02  | b9°b9y7y9y10                                                                                                                                                     | 1238.58 | 116.321 | 1662   | 1 | 1238.58 | 2.66   |
| P08567 PLEK_HUMAN Pleckstrin                   | 1  |                                                | EDPAYLHYYPAGAEDPLGAIHLR              | 269 | 24 | 24 | 171.04 | b2b7°b7b10°b10b12b13<br>°b13b15y1y2y3y4y5y6y<br>7y8y9y10y12y13y14y22<br>y24                                                                                      | 2683.26 | 79.885  | 229942 | 4 | 671.57  | -7.28  |
| P08567 PLEK_HUMAN Pleckstrin                   | 2  |                                                | SEEEENLFEIITADEVHYFLQAATPK           | 308 | 25 | 48 | 334.75 | b1b2°b2b3°b3b4b5°b5b<br>6°b6°b6b7°b7b9°b9b10<br>°b10°b10b13°b13y2y3°<br>y3y4°y4y5°y5y6y7y8y10<br>y11y12°y12°y12y13y14<br>y15y16y18°y18y19y20y<br>21*y21y22y23y25 | 2894.41 | 122.475 | 229902 | 3 | 965.47  | -1.43  |
| P08567 PLEK_HUMAN Pleckstrin                   | 3  | Carbamidomethyl+C(5);<br>Carbamidomethyl+C(10) | IFNHCFGTGNCVIDWLVSNQSVR              | 150 | 22 | 4  | 21.07  | b12y3y7y9                                                                                                                                                        | 2666.28 | 93.545  | 130858 | 3 | 889.43  | 5.59   |
| P08567 PLEK_HUMAN Pleckstrin                   | 4  |                                                | QEGLMIASSLLNEGYLQPADMS<br>K          | 174 | 24 | 13 | 85.36  | b4b5°b5b14b15b16b17y<br>2y7y11y13y15y24                                                                                                                          | 2552.24 | 91.884  | 72037  | 3 | 851.42  | -0.48  |
| P08567 PLEK_HUMAN Pleckstrin                   | 5  | Carbamidomethyl+C(8)                           | GSTLTSPCQDFGKR                       | 51  | 14 | 8  | 72.59  | y2y3y4y7y8y9y10y14                                                                                                                                               | 1553.75 | 42.124  | 48548  | 2 | 777.38  | 5.03   |
| P08567 PLEK_HUMAN Pleckstrin                   | 6  |                                                | LPETIDLGALYLSMKDTEK                  | 119 | 19 | 5  | 15.08  | b2b14y2y3y8                                                                                                                                                      | 2137.10 | 88.930  | 22180  | 3 | 713.04  | -3.88  |
| P08567 PLEK_HUMAN Pleckstrin                   | 7  | Carbamidomethyl+C(2)                           | GCVVTVSVESNSNGRK                     | 293 | 15 | 9  | 29.7   | b2b3y1y7°y7°y7y10y11<br>y15                                                                                                                                      | 1593.75 | 30.046  | 16447  | 3 | 531.92  | -9.50  |
| P08567 PLEK_HUMAN Pleckstrin                   | 8  |                                                | QQDHFFQAAFLER                        | 75  | 14 | 11 | 57.15  | b8b13y3°y3y5°y5y8°y8°<br>y8y12°y12                                                                                                                               | 1765.83 | 72.854  | 46664  | 3 | 589.28  | 3.11   |
| P08567 PLEK_HUMAN Pleckstrin                   | 9  |                                                | LPETIDLGALYLSMK                      | 119 | 15 | 7  | 48.01  | b4°b4b11b13b14y3y11                                                                                                                                              | 1663.91 | 116.847 | 38800  | 2 | 832.46  | 6.53   |
| P08567 PLEK_HUMAN Pleckstrin                   | 10 |                                                | TEWIK                                | 335 | 5  | 1  | 13.3   | y4                                                                                                                                                               | 676.37  | 39.878  | 10773  | 2 | 338.69  | -0.09  |
| P08567 PLEK_HUMAN Pleckstrin                   | 11 |                                                | SDNSPK                               | 39  | 6  | 1  | 13.7   | y5                                                                                                                                                               | 647.31  | 72.895  | 7807   | 1 | 647.31  | 8.67   |
| P08567 PLEK_HUMAN Pleckstrin                   | 12 |                                                | GSVFNTWKPMWVVLEDGIEFYK               | 14  | 23 | 3  | 13.16  | b7b12y9                                                                                                                                                          | 2758.45 | 71.007  | 5737   | 3 | 920.16  | 20.80  |
| P08567 PLEK_HUMAN Pleckstrin                   | 13 | Carbamidomethyl+C(8)                           | GSTLTSPCQDFGK                        | 51  | 13 | 3  | 20.83  | b5b11y10                                                                                                                                                         | 1397.66 | 55.803  | 5182   | 2 | 699.33  | 13.89  |
| P08567 PLEK_HUMAN Pleckstrin                   | 14 | Carbamidomethyl+C(3)                           | QGCLLK                               | 247 | 6  | 2  | 13.7   | b3°b3                                                                                                                                                            | 718.38  | 35.499  | 4918   | 1 | 718.38  | -14.70 |
| P08567 PLEK_HUMAN Pleckstrin                   | 15 |                                                | NRQEGLMIASSLLNEGYLQPADG<br>MSK       | 172 | 26 | 9  | 51.79  | b7b11°b11b13y3y11y12<br>y13y21                                                                                                                                   | 2822.39 | 86.762  | 63447  | 3 | 941.47  | 4.24   |
| P08567 PLEK_HUMAN Pleckstrin                   | 16 |                                                | KSEEEENLFEIITADEVHYFLQAATP<br>K      | 307 | 26 | 4  | 22.01  | b11y14y°y14y15                                                                                                                                                   | 3022.50 | 116.785 | 34792  | 3 | 1008.17 | -1.29  |
| P08567 PLEK_HUMAN Pleckstrin                   | 17 |                                                | AIQMASRTGK                           | 340 | 10 | 6  | 43.43  | b6°b6b7°b7b8y6                                                                                                                                                   | 1062.56 | 105.222 | 11181  | 2 | 531.78  | -13.67 |
| P08567 PLEK_HUMAN Pleckstrin                   | 18 | Carbamidomethyl+C(6);<br>Carbamidomethyl+C(11) | KIFNHCFGTGNCVIDWLVSNQSVR             | 149 | 23 | 5  | 23.25  | b9b10°b10b12°b12                                                                                                                                                 | 2794.32 | 118.929 | 11152  | 3 | 932.11  | -13.63 |



|                                                        |    |                                                                                                    |                                        |     |    |    |        |                                                                    |         |         |        |   |         |        |
|--------------------------------------------------------|----|----------------------------------------------------------------------------------------------------|----------------------------------------|-----|----|----|--------|--------------------------------------------------------------------|---------|---------|--------|---|---------|--------|
| P08567 PLEK_HUMAN Pleckstrin                           | 19 | Phosphoryl STY(11)                                                                                 | LPETIDL GALYLSMKDTEK                   | 119 | 19 | 3  | 22.86  | b15y7y8                                                            | 2217.06 | 110.833 | 1513   | 2 | 1109.03 | -4.51  |
| P08567 PLEK_HUMAN Pleckstrin                           | 20 | Oxidation+M(5)                                                                                     | QEGLMIASSLLNEG YLQ PAGDMS<br>K         | 174 | 24 | 5  | 12.81  | b10y13°y13y16°y16                                                  | 2568.22 | 102.282 | 4619   | 3 | 856.74  | -4.56  |
| P08567 PLEK_HUMAN Pleckstrin                           | 21 | Carbamidomethyl+C(4)                                                                               | TSPCQDFGKR                             | 55  | 10 | 0  | 3.57   |                                                                    | 1195.56 | 42.086  | 7395   | 2 | 598.28  | 6.43   |
| P08567 PLEK_HUMAN Pleckstrin                           | 22 |                                                                                                    | EDPAYLHY YDPAGAEDPLGAIHLR              | 269 | 24 | 0  | 7.54   |                                                                    | 2665.24 | 79.815  | 27792  | 4 | 667.07  | -8.24  |
| P09486 SPRC_HUMAN SPARC                                | 1  | Carbamidomethyl+C(5)                                                                               | YIPCLDSELTEFPLR                        | 150 | 16 | 6  | 44.8   | b7b8b9y3y14y16                                                     | 1949.98 | 88.716  | 40359  | 2 | 975.49  | 7.57   |
| P09486 SPRC_HUMAN SPARC                                | 2  | Carbamidomethyl+C(2);<br>Carbamidomethyl+C(12);<br>Carbamidomethyl+C(14);<br>Carbamidomethyl+C(20) | VCEL DENNTPMCVCQDPTSCAPI<br>GEFEK      | 81  | 29 | 5  | 50.24  | y6y7y8y9y13                                                        | 3397.43 | 69.005  | 22062  | 3 | 1133.15 | 4.38   |
| P09486 SPRC_HUMAN SPARC                                | 3  | Carbamidomethyl+C(9)                                                                               | LHLDYIGPCK                             | 140 | 10 | 4  | 20.81  | b2b3b5°b5                                                          | 1215.61 | 54.438  | 12500  | 2 | 608.31  | -3.82  |
| P09486 SPRC_HUMAN SPARC                                | 4  |                                                                                                    | NYNMYIFPVHWFQGLDQHPIDG<br>YLSHTE LAPLR | 222 | 34 | 3  | 22.95  | b11b12b16                                                          | 4099.99 | 97.342  | 6884   | 4 | 1025.75 | -0.48  |
| P09486 SPRC_HUMAN SPARC                                | 5  | Carbamidomethyl+C(10)                                                                              | YIALDEWAGCFGIK                         | 279 | 14 | 3  | 19.46  | b4y7y13                                                            | 1642.81 | 44.810  | 59056  | 2 | 821.91  | 7.73   |
| P09486 SPRC_HUMAN SPARC                                | 6  | Carbamidomethyl+C(8)                                                                               | AWIFFLLCLAGR                           | 2   | 12 | 3  | 22.47  | b3y6y9                                                             | 1466.80 | 46.455  | 5161   | 3 | 489.60  | -1.25  |
| P09486 SPRC_HUMAN SPARC                                | 7  |                                                                                                    | LEAGDHPVELLAR                          | 205 | 13 | 4  | 28.31  | b7°b7b9b10                                                         | 1419.73 | 102.713 | 3006   | 2 | 710.37  | -20.64 |
| P09486 SPRC_HUMAN SPARC                                | 8  |                                                                                                    | IHENEK                                 | 198 | 6  | 1  | 13.7   | b3                                                                 | 769.39  | 74.318  | 2024   | 2 | 385.20  | 11.98  |
| P09486 SPRC_HUMAN SPARC                                | 9  | Carbamidomethyl+C(5);<br>Carbamidomethyl+C(21)                                                     | FFETCDLDNDKYIALDEWAGCFGI<br>K          | 268 | 25 | 9  | 92.72  | b12y3y4y5y6y7y8y11y1<br>2                                          | 3027.36 | 98.219  | 48219  | 3 | 1009.79 | 3.31   |
| P09486 SPRC_HUMAN SPARC                                | 10 | Carbamidomethyl+C(5);<br>Phosphoryl STY(11)                                                        | YIPCLDSELTEFPLR                        | 150 | 16 | 4  | 34.73  | b8b9b10°b10                                                        | 2029.94 | 85.934  | 3501   | 3 | 677.32  | 10.04  |
| P09486 SPRC_HUMAN SPARC                                | 11 | Carbamidomethyl+C(9);<br>Oxidation+M(6)                                                            | APLIPMEHCTTR                           | 256 | 12 | 4  | 22.47  | b3y9y11°y11                                                        | 1441.69 | 66.028  | 1960   | 1 | 1441.69 | -3.56  |
| P09493 TPM1_HUMAN Tropomyosin<br>alpha-1 chain         | 1  |                                                                                                    | IQLVEELDR                              | 91  | 10 | 19 | 127.22 | b2°b2b3b4b7y1y2y3y4y<br>5°y5y6y7°y7y8y9°y9*y9<br>y10               | 1243.66 | 59.697  | 442286 | 2 | 622.33  | 1.77   |
| P09493 TPM1_HUMAN Tropomyosin<br>alpha-1 chain         | 2  |                                                                                                    | LATALQK                                | 105 | 7  | 8  | 64.29  | b4°b4y3y4y5y6°y6y7                                                 | 744.45  | 28.993  | 31476  | 2 | 372.73  | -13.77 |
| P09493 TPM1_HUMAN Tropomyosin<br>alpha-1 chain         | 3  |                                                                                                    | LDKENALDR                              | 12  | 9  | 5  | 38.48  | b2y3°y3y4y5                                                        | 1073.55 | 23.003  | 5152   | 2 | 537.28  | -7.28  |
| P09493 TPM1_HUMAN Tropomyosin<br>alpha-1 chain         | 4  |                                                                                                    | SIDDLEDELYAQK                          | 251 | 13 | 3  | 20.83  | b6b10y11                                                           | 1538.74 | 64.698  | 22418  | 2 | 769.88  | 13.80  |
| P09493 TPM1_HUMAN Tropomyosin<br>alpha-1 chain         | 5  |                                                                                                    | ATDAEADVASLNR                          | 77  | 13 | 5  | 29.94  | b3b12y8*y8y12                                                      | 1332.63 | 52.007  | 10504  | 2 | 666.82  | -8.34  |
| P09493 TPM1_HUMAN Tropomyosin<br>alpha-1 chain         | 6  |                                                                                                    | ENALDRAEQAEADK                         | 15  | 14 | 6  | 39.38  | b6°b6b12b13y3y10                                                   | 1559.74 | 90.150  | 2715   | 2 | 780.37  | 6.50   |
| P09493 TPM1_HUMAN Tropomyosin<br>alpha-1 chain         | 7  |                                                                                                    | LATALQK                                | 105 | 7  | 0  | 0.79   |                                                                    | 726.44  | 28.985  | 4406   | 2 | 363.73  | -4.12  |
| P09972 ALDOC_HUMAN Fructose-<br>biphosphate aldolase C | 1  | Carbamidomethyl+C(5)                                                                               | YASICQQNGIVPIVEPEILPDGDHD<br>LKR       | 173 | 28 | 20 | 104.49 | b4b9b10°b10*b10b11°b<br>11°b11y1y3y5y7y9y10y<br>11y13y14°y14y17y28 | 3176.58 | 76.588  | 94936  | 4 | 794.90  | -7.07  |
| P09972 ALDOC_HUMAN Fructose-<br>biphosphate aldolase C | 2  |                                                                                                    | YTPEEIAMATVTALRR                       | 243 | 16 | 5  | 27.92  | b6b10b14y15y16                                                     | 1821.93 | 91.156  | 37052  | 3 | 607.98  | -11.39 |
| P09972 ALDOC_HUMAN Fructose-<br>biphosphate aldolase C | 3  |                                                                                                    | YEGSGEDGGAAAQSLYIANHAY                 | 342 | 22 | 3  | 23.43  | y4y5y7                                                             | 2243.99 | 62.304  | 3905   | 2 | 1122.50 | 2.18   |
| P09972 ALDOC_HUMAN Fructose-<br>biphosphate aldolase C | 4  |                                                                                                    | LSQIGVENTEENRR                         | 43  | 14 | 8  | 60.83  | b12y5y6*y6y8y11y13*y<br>13                                         | 1644.85 | 109.870 | 3189   | 2 | 822.93  | 11.06  |

|                                                       |    |                      |                                      |     |    |    |        |                                           |         |         |        |   |         |        |
|-------------------------------------------------------|----|----------------------|--------------------------------------|-----|----|----|--------|-------------------------------------------|---------|---------|--------|---|---------|--------|
| [P09972]ALDOC_HUMAN Fructose-bisphosphate aldolase C  | 5  |                      | IVAPGK                               | 22  | 6  | 1  | 13.7   | b5                                        | 584.38  | 43.284  | 17488  | 1 | 584.38  | 7.83   |
| [P09972]ALDOC_HUMAN Fructose-bisphosphate aldolase C  | 6  |                      | TVPPAVPGVTFLSGGQSEEEASFNLNAINR       | 259 | 30 | 8  | 26.68  | b5b16y10y12*y12y14*y14y16                 | 3101.55 | 94.568  | 13139  | 3 | 1034.52 | -1.97  |
| [P09972]ALDOC_HUMAN Fructose-bisphosphate aldolase C  | 7  |                      | ISER                                 | 153 | 4  | 1  | 12.91  | y3                                        | 504.28  | 71.525  | 5664   | 1 | 504.28  | 3.09   |
| [P09972]ALDOC_HUMAN Fructose-bisphosphate aldolase C  | 8  |                      | MPHSYPALSAEQK                        | 0   | 13 | 5  | 34.34  | b3b6b8y11*y11                             | 1458.70 | 109.691 | 4602   | 2 | 729.85  | -5.44  |
| [P09972]ALDOC_HUMAN Fructose-bisphosphate aldolase C  | 9  |                      | LSQIGVENTEENR                        | 43  | 13 | 7  | 48.68  | b3*b3b5*b5y9y10y11                        | 1488.73 | 46.381  | 3631   | 2 | 744.87  | -0.57  |
| [P09972]ALDOC_HUMAN Fructose-bisphosphate aldolase C  | 10 |                      | GVVPLAGTDGETTTQGLDGLSER              | 111 | 23 | 5  | 20.32  | b3b11b13y10*y10                           | 2273.08 | 122.617 | 2665   | 3 | 758.37  | -18.37 |
| [P09972]ALDOC_HUMAN Fructose-bisphosphate aldolase C  | 11 | Carbamidomethyl+C(1) | CIGGVIFFHETLYQK                      | 72  | 15 | 13 | 76.95  | b3b4b12*b12b13y6*y6y8*y8*y8y9*y9y12       | 1811.93 | 97.625  | 2643   | 3 | 604.65  | 6.87   |
| [P09972]ALDOC_HUMAN Fructose-bisphosphate aldolase C  | 12 |                      | DDNGVVPFVR                           | 87  | 9  | 5  | 57.81  | b3b4*b4b6b8                               | 1018.48 | 46.437  | 2497   | 1 | 1018.48 | -10.73 |
| [P09972]ALDOC_HUMAN Fructose-bisphosphate aldolase C  | 13 |                      | IVAPGKGILAADESVGSMAK                 | 22  | 20 | 3  | 14.51  | b5y4y8                                    | 1914.02 | 118.599 | 18293  | 3 | 638.68  | -9.12  |
| [P09972]ALDOC_HUMAN Fructose-bisphosphate aldolase C  | 14 |                      | AEVNGLAAQKGK YEGSGEDGGAA AQLSYIANHAY | 331 | 33 | 3  | 11.09  | b7b9y3                                    | 3282.51 | 87.001  | 5017   | 3 | 1094.84 | -5.65  |
| [P09972]ALDOC_HUMAN Fructose-bisphosphate aldolase C  | 15 |                      | RTVPPAVPGVTFLSGGQSEEEASFNLNAINR      | 258 | 31 | 4  | 11.3   | b15y3*y3y14                               | 3257.63 | 86.332  | 3123   | 3 | 1086.55 | -8.84  |
| [P09972]ALDOC_HUMAN Fructose-bisphosphate aldolase C  | 16 |                      | DDNGVFPVRTIQDK                       | 87  | 14 | 3  | 27.25  | b9b10b13                                  | 1603.81 | 103.817 | 1908   | 2 | 802.41  | -0.38  |
| [P09972]ALDOC_HUMAN Fructose-bisphosphate aldolase C  | 17 | Phosphoryl STY(8)    | GILAADESVGSMAK                       | 28  | 14 | 5  | 40.17  | b7b9b11y9y13                              | 1428.65 | 26.832  | 1702   | 2 | 714.83  | 8.03   |
| [P09972]ALDOC_HUMAN Fructose-bisphosphate aldolase C  | 18 |                      | PIVEPEILPDGDHDLKR                    | 184 | 17 | 4  | 39.55  | b3b4b12b13                                | 1943.02 | 76.586  | 7169   | 2 | 972.01  | -2.01  |
| [P09972]ALDOC_HUMAN Fructose-bisphosphate aldolase C  | 19 |                      | PEILPDGDHDLKR                        | 188 | 13 | 1  | 8.81   | b11                                       | 1504.78 | 76.527  | 1942   | 3 | 502.26  | 0.08   |
| [P10720]PF4V_HUMAN Platelet factor 4 variant          | 1  | Carbamidomethyl+C(5) | AGPHCPTAQLIATLK                      | 65  | 15 | 17 | 187.94 | b4b5b7b8b9b10b13*b13b14y3y4y5y6y7y8y11y15 | 1577.83 | 61.455  | 386705 | 3 | 526.61  | -12.15 |
| [P10720]PF4V_HUMAN Platelet factor 4 variant          | 2  |                      | HITSLEVIK                            | 56  | 9  | 14 | 111.02 | b1b2b4*b4b5*b5b6b7y2y3y4y7y8y9            | 1039.61 | 48.733  | 288121 | 2 | 520.31  | -2.47  |
| [P10720]PF4V_HUMAN Platelet factor 4 variant          | 3  |                      | SSAAR                                | 1   | 5  | 1  | 13.3   | y4                                        | 491.26  | 28.158  | 15618  | 1 | 491.26  | 10.50  |
| [P11142]HSP7C_HUMAN Heat shock cognate 71 kDa protein | 1  |                      | VEIANDQGNR                           | 25  | 11 | 8  | 64.41  | b2b3b7y4y6y7y8y11                         | 1228.62 | 36.891  | 58804  | 2 | 614.82  | -2.58  |
| [P11142]HSP7C_HUMAN Heat shock cognate 71 kDa protein | 2  |                      | TTPSYVAFTDTER                        | 36  | 13 | 10 | 62.78  | b1*b1b5b9y3y6y9y11*y11y13                 | 1487.71 | 55.692  | 51609  | 2 | 744.36  | 2.71   |
| [P11142]HSP7C_HUMAN Heat shock cognate 71 kDa protein | 3  | Carbamidomethyl+C(2) | VCNPIITK                             | 601 | 8  | 5  | 33.32  | b2b5y6y7y8                                | 944.52  | 39.956  | 39201  | 2 | 472.76  | -3.88  |
| [P11142]HSP7C_HUMAN Heat shock cognate 71 kDa protein | 4  |                      | FEELNADLFR                           | 301 | 10 | 4  | 27.12  | b3b9y8y10                                 | 1253.62 | 74.666  | 35560  | 2 | 627.31  | 2.24   |
| [P11142]HSP7C_HUMAN Heat shock cognate 71 kDa protein | 5  |                      | NSLESYAFNMK                          | 539 | 11 | 6  | 13.42  | b2*b2b4*b8y8y11                           | 1303.61 | 65.104  | 26649  | 2 | 652.31  | 9.46   |
| [P11142]HSP7C_HUMAN Heat shock cognate 71 kDa protein | 6  |                      | TVTNAVVTVPAYFNDSQR                   | 137 | 18 | 5  | 62.13  | y9y10y11y12y13                            | 1982.00 | 69.370  | 25821  | 2 | 991.51  | 3.02   |
| [P11142]HSP7C_HUMAN Heat shock cognate 71 kDa protein | 7  |                      | DAGTIAGLNVLR                         | 159 | 12 | 3  | 22.47  | b3b7y3                                    | 1199.69 | 72.803  | 25758  | 2 | 600.35  | 10.18  |
| [P11142]HSP7C_HUMAN Heat shock cognate 71 kDa protein | 8  |                      | STAGDTHLGGEDFDNR                     | 220 | 16 | 6  | 23.86  | b2*b2b8y8y9y16                            | 1691.71 | 39.112  | 18711  | 3 | 564.58  | -7.14  |
| [P11142]HSP7C_HUMAN Heat shock cognate 71 kDa protein | 9  |                      | QTQFTTYSNQPGLVQVYEGER                | 423 | 24 | 3  | 12.81  | b16y5y12                                  | 2774.30 | 77.791  | 8571   | 3 | 925.44  | -9.68  |
| [P11142]HSP7C_HUMAN Heat shock cognate 71 kDa protein | 10 |                      | NQVAMNPTNTVFDK                       | 56  | 15 | 5  | 38.15  | b11b12b13*b13y12                          | 1649.80 | 73.383  | 3475   | 2 | 825.40  | 0.30   |

|                                                      |    |                                                                                |                                            |     |    |    |        |                                                     |         |         |        |   |         |        |
|------------------------------------------------------|----|--------------------------------------------------------------------------------|--------------------------------------------|-----|----|----|--------|-----------------------------------------------------|---------|---------|--------|---|---------|--------|
| P11142 HSP7C_HUMAN Heat shock cognate 71 kDa protein | 11 | Carbamidomethyl+C(1)                                                           | CNEIINWLDK                                 | 573 | 10 | 3  | 28.88  | b8b9y6                                              | 1304.60 | 43.290  | 165513 | 2 | 652.81  | -20.30 |
| P11142 HSP7C_HUMAN Heat shock cognate 71 kDa protein | 12 |                                                                                | LYQSAGGMPPGMPGGFPPGGGAP<br>PSGGASSGPTIEEVD | 609 | 37 | 4  | 21.46  | b29y7y8y19                                          | 3346.45 | 87.964  | 45793  | 4 | 837.37  | -15.76 |
| P11142 HSP7C_HUMAN Heat shock cognate 71 kDa protein | 13 | Carbamidomethyl+C(14)                                                          | GPAVGDIDLGTTYSCVGVFQH GK                   | 3   | 22 | 3  | 13.56  | b12b15y14                                           | 2263.07 | 116.159 | 18007  | 3 | 755.03  | -21.90 |
| P11142 HSP7C_HUMAN Heat shock cognate 71 kDa protein | 14 |                                                                                | HWPFMVVNDAGRPK                             | 88  | 14 | 4  | 33.28  | b6b8y12y13                                          | 1653.81 | 78.312  | 17112  | 2 | 827.41  | -14.84 |
| P11142 HSP7C_HUMAN Heat shock cognate 71 kDa protein | 15 |                                                                                | VGAER                                      | 188 | 5  | 1  | 13.3   | b3                                                  | 531.28  | 56.084  | 12103  | 1 | 531.28  | -12.64 |
| P11142 HSP7C_HUMAN Heat shock cognate 71 kDa protein | 16 |                                                                                | YKAEDEK                                    | 524 | 7  | 3  | 37.69  | b5b6y6                                              | 882.42  | 41.199  | 20315  | 1 | 882.42  | -0.83  |
| P11142 HSP7C_HUMAN Heat shock cognate 71 kDa protein | 17 | Carbamidomethyl+C(14)                                                          | GPAVGIDLGTTYSCVGVFQH GK<br>EIIANDQGNR      | 3   | 33 | 3  | 16.87  | b15b17b19                                           | 3472.72 | 80.546  | 19091  | 4 | 868.93  | -3.66  |
| P11142 HSP7C_HUMAN Heat shock cognate 71 kDa protein | 18 |                                                                                | NSLESYAFNMKATVEDEK                         | 539 | 18 | 14 | 78.23  | b6b12°b12b13y3y4y6°y<br>6y10*y10y13°y13y14*y<br>14  | 2075.98 | 100.344 | 9373   | 2 | 1038.49 | 10.70  |
| P11142 HSP7C_HUMAN Heat shock cognate 71 kDa protein | 19 | Carbamidomethyl+C(5)                                                           | ILDKCNEIINWLDK                             | 569 | 14 | 5  | 27.84  | b5b11y5°y5y10                                       | 1773.90 | 79.152  | 6122   | 3 | 591.97  | -9.84  |
| P11142 HSP7C_HUMAN Heat shock cognate 71 kDa protein | 20 |                                                                                | SFYPEEVSSMVLTKMK                           | 112 | 16 | 3  | 17.33  | b12y4y12                                            | 1875.92 | 116.797 | 2047   | 3 | 625.98  | -3.06  |
| P12605 FUS_PIIHC Fusion glycoprotein F0              | 1  | Carbamidomethyl+C(12)                                                          | ASSLGGADVTNCIESR                           | 322 | 16 | 10 | 56.06  | b1b6b7b15°b15y2y7y8y<br>9y16                        | 1636.75 | 40.153  | 33206  | 2 | 818.88  | -3.65  |
| P12605 FUS_PIIHC Fusion glycoprotein F0              | 2  | Carbamidomethyl+C(12)<br>;Carbamidomethyl+C(17)<br>);Carbamidomethyl+C(1<br>9) | FAFINGGVVANCIASTCTCGTNR                    | 378 | 23 | 7  | 37.55  | b2b13b14y3y4*y4y22                                  | 2490.11 | 120.494 | 2058   | 4 | 623.28  | -10.88 |
| P12605 FUS_PIIHC Fusion glycoprotein F0              | 3  |                                                                                | DIALIK                                     | 145 | 6  | 3  | 43.31  | b3y3y5                                              | 672.43  | 53.160  | 27590  | 1 | 672.43  | 5.26   |
| P12605 FUS_PIIHC Fusion glycoprotein F0              | 4  |                                                                                | DSIIK                                      | 151 | 5  | 1  | 13.3   | b3                                                  | 575.34  | 42.070  | 24426  | 1 | 575.34  | 6.26   |
| P12605 FUS_PIIHC Fusion glycoprotein F0              | 5  |                                                                                | LGIK                                       | 201 | 4  | 1  | 12.91  | y3                                                  | 430.30  | 47.139  | 15685  | 1 | 430.30  | 4.40   |
| P12605 FUS_PIIHC Fusion glycoprotein F0              | 6  |                                                                                | TLQDFVNNEIRPAIGELR                         | 176 | 18 | 8  | 44.65  | b4°b4b5b7b9°b9b13*b1<br>3                           | 2085.11 | 96.493  | 10375  | 2 | 1043.06 | -1.41  |
| P12605 FUS_PIIHC Fusion glycoprotein F0              | 7  |                                                                                | NLLNR                                      | 75  | 5  | 1  | 13.3   | y4                                                  | 629.37  | 39.233  | 5331   | 1 | 629.37  | -4.17  |
| P12605 FUS_PIIHC Fusion glycoprotein F0              | 8  |                                                                                | LLVMINSTHNSPVNTYTLESR                      | 523 | 21 | 6  | 32.28  | b10y8y10y14°y14y18                                  | 2389.17 | 79.975  | 3917   | 2 | 1195.09 | -19.62 |
| P12605 FUS_PIIHC Fusion glycoprotein F0              | 9  |                                                                                | SDIYDIHYTEQVK                              | 253 | 13 | 8  | 46.46  | b9°b9b10°b10y6y9*y9y<br>10                          | 1586.83 | 104.440 | 3694   | 2 | 793.92  | 20.85  |
| P12605 FUS_PIIHC Fusion glycoprotein F0              | 10 | Carbamidomethyl+C(12)<br>;Carbamidomethyl+C(21<br>)                            | ASSLGGADVTNCIESRLAYICPR                    | 322 | 23 | 4  | 37.13  | b10b12b13b14                                        | 2510.22 | 84.695  | 37787  | 2 | 1255.61 | 2.24   |
| P12605 FUS_PIIHC Fusion glycoprotein F0              | 11 |                                                                                | MRNPYIGNNSN                                | 544 | 11 | 3  | 24.51  | b7b9y9                                              | 1279.59 | 62.486  | 6395   | 2 | 640.30  | 2.96   |
| P12605 FUS_PIIHC Fusion glycoprotein F0              | 12 | Phosphoryl STY(10)                                                             | LTQHYSELATAFSSNLGTIGEK                     | 205 | 22 | 5  | 29.24  | b9b21y10y12y13                                      | 2447.11 | 116.315 | 8344   | 3 | 816.37  | -13.57 |
| P12605 FUS_PIIHC Fusion glycoprotein F0              | 13 | Carbamidomethyl+C(3)                                                           | TNCIESR                                    | 331 | 7  | 0  | 4.37   |                                                     | 879.40  | 40.097  | 8243   | 1 | 879.40  | 1.60   |
| P12605 FUS_PIIHC Fusion glycoprotein F0              | 14 | Carbamidomethyl+C(12)                                                          | ASSLGGADVTNCI                              | 322 | 13 | 1  | 7.25   | y8                                                  | 1264.58 | 40.204  | 5894   | 3 | 422.20  | -5.60  |
| P12814 ACTN1_HUMAN Alpha-actinin-1                   | 1  |                                                                                | VGWEQLLTIAR                                | 714 | 12 | 19 | 167.92 | b1b4b5*b5b6*b6b8b9y<br>2y3y4y5y6y7y8*y8y9y1<br>1y12 | 1386.77 | 98.548  | 232022 | 2 | 693.89  | -1.14  |

|                                    |    |                       |                                 |     |    |    |        |                                                                                       |         |         |        |   |         |        |
|------------------------------------|----|-----------------------|---------------------------------|-----|----|----|--------|---------------------------------------------------------------------------------------|---------|---------|--------|---|---------|--------|
| P12814 ACTN1_HUMAN Alpha-actinin-1 | 2  |                       | AIMTYVSSFYHAFSGAQK              | 236 | 18 | 31 | 201.26 | b2b3b5°b5b9b13b14y1y2*y2y4y5°y5y6°y6y7y8°y8*y8y9y10°y10y11y12°y12y13y14y16*y16y18*y18 | 2007.95 | 91.000  | 170186 | 3 | 669.99  | -5.53  |
| P12814 ACTN1_HUMAN Alpha-actinin-1 | 3  |                       | TINEVENQILTR                    | 726 | 12 | 9  | 64.02  | b2°b2b9b10y3y4y6y10y12                                                                | 1429.76 | 60.369  | 134055 | 2 | 715.38  | -1.45  |
| P12814 ACTN1_HUMAN Alpha-actinin-1 | 4  |                       | VEQIAAIAQELNELDYDPSVNA<br>R     | 450 | 25 | 23 | 155.53 | b2b3b4b5b6°b6b7b13b14y2y3*y3y4*y4y5y6*y6y7y8*y8y10y12y25                              | 2808.40 | 95.066  | 127322 | 3 | 936.81  | 12.17  |
| P12814 ACTN1_HUMAN Alpha-actinin-1 | 5  |                       | MLDAEDIVGTARPDEK                | 220 | 16 | 9  | 45.39  | b11°b11b14y5y11y12y14°y14y16                                                          | 1759.84 | 60.608  | 123874 | 3 | 587.29  | -6.38  |
| P12814 ACTN1_HUMAN Alpha-actinin-1 | 6  |                       | LASDLLEWIR                      | 281 | 10 | 5  | 34.11  | y2y3y4y8y10                                                                           | 1215.67 | 92.499  | 118327 | 2 | 608.34  | -3.92  |
| P12814 ACTN1_HUMAN Alpha-actinin-1 | 7  |                       | VLAVNQENEQLMEDYEK               | 264 | 17 | 8  | 43.16  | b2b3b12y3y6y12y13y17                                                                  | 2051.97 | 62.090  | 110547 | 2 | 1026.49 | 4.52   |
| P12814 ACTN1_HUMAN Alpha-actinin-1 | 8  |                       | IDQLEGDHQLIQEALIFDNK            | 684 | 20 | 8  | 49.91  | b3y1y3y4*y4y5y6y20                                                                    | 2339.20 | 82.601  | 102729 | 3 | 780.40  | 3.13   |
| P12814 ACTN1_HUMAN Alpha-actinin-1 | 9  | Carbamidomethyl+C(2)  | ICDQWDNLGALTQK                  | 478 | 14 | 9  | 57.07  | b2y2y3y4y6y9y12°y12y14                                                                | 1661.77 | 70.341  | 86567  | 2 | 831.39  | -12.56 |
| P12814 ACTN1_HUMAN Alpha-actinin-1 | 10 |                       | LLETIDQLYLEYAKR                 | 502 | 15 | 14 | 80.05  | b2b3°b3b5y1y4y5y7y8y10°y10*y10y13y15                                                  | 1868.00 | 86.289  | 82931  | 3 | 623.34  | -9.54  |
| P12814 ACTN1_HUMAN Alpha-actinin-1 | 11 |                       | LLETIDQLYLEYAK                  | 502 | 14 | 11 | 92.67  | b5y2y3y4y5y6y9y10y11°y11y14                                                           | 1711.93 | 91.874  | 80311  | 2 | 856.47  | 6.63   |
| P12814 ACTN1_HUMAN Alpha-actinin-1 | 12 | Carbamidomethyl+C(11) | MVSDINNAWGCLEQVEK               | 359 | 17 | 5  | 30.15  | b8b13y8y9y17                                                                          | 1992.93 | 76.749  | 70847  | 2 | 996.97  | 5.64   |
| P12814 ACTN1_HUMAN Alpha-actinin-1 | 13 |                       | IVQTYHVN MAGTNPYTTITPQEIN<br>GK | 577 | 26 | 10 | 41.25  | b7b10b13b19y7y8*y8y13*y13y26                                                          | 2890.43 | 64.649  | 54080  | 3 | 964.15  | -2.20  |
| P12814 ACTN1_HUMAN Alpha-actinin-1 | 14 |                       | QFGAQANVIGPWQTK                 | 633 | 16 | 6  | 27.92  | b7b12b15°b15y7y16                                                                     | 1757.94 | 76.446  | 50663  | 2 | 879.47  | 1.46   |
| P12814 ACTN1_HUMAN Alpha-actinin-1 | 15 |                       | RDQALTEEHAR                     | 613 | 11 | 9  | 53.33  | b1b2b3b4b5b7y1y2y3                                                                    | 1325.65 | 17.524  | 28903  | 3 | 442.55  | -6.26  |
| P12814 ACTN1_HUMAN Alpha-actinin-1 | 16 |                       | ATLPDADKER                      | 555 | 10 | 8  | 61.51  | b2b9y1y3y5y7y8y10                                                                     | 1115.57 | 26.327  | 27447  | 2 | 558.29  | 1.20   |
| P12814 ACTN1_HUMAN Alpha-actinin-1 | 17 |                       | HEAFESDLAAHQDR                  | 436 | 14 | 5  | 31.8   | b1b6b8b10y8                                                                           | 1625.72 | 37.389  | 19215  | 3 | 542.58  | -8.33  |
| P12814 ACTN1_HUMAN Alpha-actinin-1 | 18 | Carbamidomethyl+C(10) | ELPPDQAEYCIAR                   | 850 | 13 | 4  | 28.31  | y4y6y7y13                                                                             | 1561.73 | 50.799  | 8875   | 2 | 781.37  | 2.03   |
| P12814 ACTN1_HUMAN Alpha-actinin-1 | 19 |                       | DQALTEEHAR                      | 614 | 10 | 8  | 74.81  | b3°b3y2y3y4y5y6y7                                                                     | 1169.55 | 21.305  | 4804   | 2 | 585.28  | -1.04  |
| P12814 ACTN1_HUMAN Alpha-actinin-1 | 20 |                       | ASFNHFRDRHSGTLGPEEFK            | 752 | 20 | 4  | 22.84  | b5b14b16y8                                                                            | 2291.06 | 101.160 | 2722   | 4 | 573.52  | 5.22   |
| P12814 ACTN1_HUMAN Alpha-actinin-1 | 21 |                       | AGTQIENIEEDFRDGLK               | 47  | 17 | 3  | 23.88  | b7b11b14                                                                              | 1934.93 | 89.040  | 2213   | 2 | 967.97  | -5.99  |
| P12814 ACTN1_HUMAN Alpha-actinin-1 | 22 |                       | LSNRPAFMPSEGR                   | 346 | 13 | 4  | 20.83  | b3y4°y4y12                                                                            | 1461.74 | 107.341 | 1899   | 1 | 1461.74 | 8.27   |
| P12814 ACTN1_HUMAN Alpha-actinin-1 | 23 |                       | LAILGIHNEVSK                    | 565 | 12 | 5  | 37.54  | b3y3y6*y6y9                                                                           | 1293.73 | 58.882  | 143303 | 3 | 431.91  | -17.55 |
| P12814 ACTN1_HUMAN Alpha-actinin-1 | 24 |                       | ALDFIASK                        | 95  | 8  | 4  | 49.63  | b3y4y5y6                                                                              | 864.48  | 55.847  | 55146  | 2 | 432.74  | -7.91  |
| P12814 ACTN1_HUMAN Alpha-actinin-1 | 25 |                       | ASIHEAWTDGK                     | 402 | 11 | 6  | 65.38  | b5b7b8y3y5y8                                                                          | 1214.57 | 38.559  | 40741  | 3 | 405.53  | -11.56 |
| P12814 ACTN1_HUMAN Alpha-actinin-1 | 26 |                       | DYETATLSEIK                     | 420 | 11 | 4  | 24.51  | b3°b3b7y6                                                                             | 1269.62 | 38.116  | 40221  | 3 | 423.88  | -2.88  |
| P12814 ACTN1_HUMAN Alpha-actinin-1 | 27 | Carbamidomethyl+C(2)  | ACLSLGYDIGNDPQGEAEFAR           | 772 | 22 | 7  | 25.89  | b6b14b17°b17y7y14*y14                                                                 | 2396.17 | 81.928  | 30882  | 3 | 799.40  | 21.70  |

|                                    |    |                                             |                                           |     |    |    |       |                                        |         |         |       |   |         |        |
|------------------------------------|----|---------------------------------------------|-------------------------------------------|-----|----|----|-------|----------------------------------------|---------|---------|-------|---|---------|--------|
| P12814 ACTN1_HUMAN Alpha-actinin-1 | 28 |                                             | AAPFNNWMEGAMEDLQDTFIVH<br>TIEEQGLTTAHEQFK | 517 | 38 | 13 | 66.43 | b3b5*b5y3y4y6y7y8y10<br>y10y11*y11*y11 | 4362.03 | 136.250 | 29124 | 4 | 1091.26 | -4.37  |
| P12814 ACTN1_HUMAN Alpha-actinin-1 | 29 |                                             | DLLLDPAWEK                                | 21  | 10 | 4  | 27.12 | b9*b9y6y8                              | 1199.64 | 78.267  | 26173 | 2 | 600.32  | 4.07   |
| P12814 ACTN1_HUMAN Alpha-actinin-1 | 30 |                                             | NVNIQNFHISWK                              | 162 | 12 | 3  | 26.45 | b8b9y10                                | 1499.77 | 51.578  | 21706 | 3 | 500.59  | -3.58  |
| P12814 ACTN1_HUMAN Alpha-actinin-1 | 31 |                                             | AGTQIENIEEDFR                             | 47  | 13 | 4  | 41.61 | b4b5b7b10                              | 1521.75 | 54.566  | 15286 | 3 | 507.92  | 20.46  |
| P12814 ACTN1_HUMAN Alpha-actinin-1 | 32 |                                             | VPENTMHAMQKK                              | 300 | 12 | 4  | 22.47 | b6y4y6*y6                              | 1413.69 | 28.826  | 12575 | 3 | 471.90  | 18.05  |
| P12814 ACTN1_HUMAN Alpha-actinin-1 | 33 |                                             | GISQEQMNEFR                               | 741 | 11 | 6  | 31.5  | y3*y3y4*y4*y4y9                        | 1338.64 | 48.632  | 8477  | 2 | 669.82  | 18.79  |
| P12814 ACTN1_HUMAN Alpha-actinin-1 | 34 |                                             | YLDIPK                                    | 214 | 6  | 1  | 13.7  | b3                                     | 748.42  | 32.621  | 5828  | 2 | 374.72  | 0.98   |
| P12814 ACTN1_HUMAN Alpha-actinin-1 | 35 |                                             | HTNYTMEHIR                                | 704 | 10 | 3  | 27.12 | b8y6y9                                 | 1301.63 | 33.446  | 3091  | 2 | 651.32  | 15.38  |
| P12814 ACTN1_HUMAN Alpha-actinin-1 | 36 |                                             | DDPLTNLNTAFDVAEK                          | 198 | 16 | 6  | 45.69 | b10b12b15y3y5y14                       | 1762.82 | 79.945  | 3007  | 2 | 881.91  | -16.97 |
| P12814 ACTN1_HUMAN Alpha-actinin-1 | 37 |                                             | LMLLLEVISGER                              | 64  | 12 | 3  | 29.67 | y4y5y8                                 | 1372.79 | 108.606 | 2526  | 2 | 686.90  | 3.29   |
| P12814 ACTN1_HUMAN Alpha-actinin-1 | 38 |                                             | TAPYK                                     | 157 | 5  | 1  | 13.3  | b4                                     | 579.31  | 109.490 | 2394  | 1 | 579.31  | -1.69  |
| P12814 ACTN1_HUMAN Alpha-actinin-1 | 39 | Carbamidomethyl+C(6)                        | TFTAWCNSHLR                               | 35  | 11 | 5  | 38.6  | b9b10y6y8*y8                           | 1392.67 | 55.744  | 2114  | 2 | 696.84  | 14.38  |
| P12814 ACTN1_HUMAN Alpha-actinin-1 | 40 |                                             | IDQLEGDHQLIQEALIFDNKHTNY<br>TMEHIR        | 684 | 30 | 3  | 22.05 | b10b11y14                              | 3621.73 | 76.718  | 96617 | 5 | 725.15  | -13.28 |
| P12814 ACTN1_HUMAN Alpha-actinin-1 | 41 |                                             | VPENTMHAMQKKLEDFR                         | 300 | 17 | 5  | 26.39 | b3b6b14y6*y6                           | 2073.99 | 108.584 | 37364 | 3 | 692.00  | 3.88   |
| P12814 ACTN1_HUMAN Alpha-actinin-1 | 42 |                                             | LLETIDQLYEYAKR                            | 502 | 15 | 3  | 18.31 | b9y7y13                                | 1868.00 | 74.681  | 20577 | 2 | 934.50  | -8.23  |
| P12814 ACTN1_HUMAN Alpha-actinin-1 | 43 | Carbamidomethyl+C(2)                        | ACLISLGYDIGNDPQGEAEFARIMS<br>IVDPNR       | 772 | 31 | 7  | 29.79 | b3b9*b9b11y3*y3y4                      | 3421.61 | 119.651 | 5578  | 3 | 1141.21 | -10.85 |
| P12814 ACTN1_HUMAN Alpha-actinin-1 | 44 |                                             | ILAGDKNYITMDEL                            | 834 | 15 | 4  | 32.07 | b4b5y5y7                               | 1751.91 | 94.370  | 4652  | 3 | 584.64  | 5.64   |
| P12814 ACTN1_HUMAN Alpha-actinin-1 | 45 |                                             | ASFNHFDRDHSGLTGPPEFK                      | 752 | 20 | 3  | 14.51 | b4y4y9                                 | 2291.01 | 38.046  | 3769  | 4 | 573.51  | -14.49 |
| P12814 ACTN1_HUMAN Alpha-actinin-1 | 46 |                                             | DQALTEEHARQQHNER                          | 614 | 16 | 4  | 27.92 | b6b8b11y5                              | 1961.91 | 127.969 | 2100  | 2 | 981.46  | -2.24  |
| P12814 ACTN1_HUMAN Alpha-actinin-1 | 47 |                                             | IVQTYHVNMMAGTNPYTTITPQEIN<br>GKWDHVR      | 577 | 31 | 4  | 22.1  | b13b14*b14y11                          | 3583.75 | 107.179 | 1854  | 3 | 1195.25 | -8.24  |
| P12814 ACTN1_HUMAN Alpha-actinin-1 | 48 | Carbamidomethyl+C(2);<br>Phosphoryl STY(12) | ICDQWDLGALTQKR                            | 478 | 15 | 5  | 29.7  | b10y4y7y9*y9                           | 1897.87 | 45.547  | 16638 | 3 | 633.30  | 9.46   |
| P12814 ACTN1_HUMAN Alpha-actinin-1 | 49 | Phosphoryl STY(9)                           | MDHYDSQQTNDYMQPEEDWDR                     | 0   | 21 | 5  | 14    | b10*b10b13*b13y11                      | 2782.95 | 136.839 | 5450  | 2 | 1391.98 | -14.83 |
| P12814 ACTN1_HUMAN Alpha-actinin-1 | 50 | Phosphoryl STY(6)                           | RDQALTEEHAR                               | 613 | 11 | 5  | 24.51 | b4*b4*b4y4y8                           | 1405.60 | 45.483  | 3855  | 2 | 703.31  | -6.51  |
| P12814 ACTN1_HUMAN Alpha-actinin-1 | 51 | Phosphoryl STY(3)                           | GISQEQMNEFR                               | 741 | 11 | 6  | 37.02 | b4*b4b5*b5b7y7                         | 1418.55 | 18.042  | 1746  | 2 | 709.78  | -9.29  |
| P12814 ACTN1_HUMAN Alpha-actinin-1 | 52 | Oxidation+M(5)                              | ISIEMHGTLEDQLSHLR                         | 655 | 17 | 3  | 16.47 | b12y8y11                               | 1994.97 | 83.113  | 3153  | 2 | 997.99  | -11.32 |
| P12814 ACTN1_HUMAN Alpha-actinin-1 | 53 |                                             | LPDADKER                                  | 557 | 8  | 0  | 1.98  |                                        | 943.48  | 26.324  | 15700 | 2 | 472.24  | -4.66  |
| P12814 ACTN1_HUMAN Alpha-actinin-1 | 54 |                                             | PDADKER                                   | 558 | 7  | 1  | 8.3   | b4                                     | 830.40  | 26.322  | 12194 | 2 | 415.70  | -0.81  |
| P12814 ACTN1_HUMAN Alpha-actinin-1 | 55 |                                             | TLPDADKER                                 | 556 | 9  | 0  | 1.98  |                                        | 1044.53 | 26.324  | 7158  | 2 | 522.77  | 1.87   |

|                                                  |    |                       |                                    |     |    |    |        |                                         |         |         |        |   |         |        |
|--------------------------------------------------|----|-----------------------|------------------------------------|-----|----|----|--------|-----------------------------------------|---------|---------|--------|---|---------|--------|
| P12814 ACTN1_HUMAN Alpha-actinin-1               | 56 | Carbamidomethyl+C(2)  | ICDQWDNLGALTQK                     | 478 | 14 | 0  | 3.57   |                                         | 1643.79 | 70.391  | 23844  | 3 | 548.60  | 4.68   |
| P12814 ACTN1_HUMAN Alpha-actinin-1               | 57 |                       | ATLPDADKER                         | 555 | 10 | 0  | 1.98   |                                         | 1097.54 | 26.321  | 2654   | 3 | 366.52  | -13.68 |
| P12814 ACTN1_HUMAN Alpha-actinin-1               | 58 |                       | VGWEQLLTTIAR                       | 714 | 12 | 0  | 2.78   |                                         | 1368.74 | 98.525  | 1582   | 3 | 456.92  | -13.82 |
| P13929 ENOB_HUMAN Beta-enolase                   | 1  |                       | AAVPSGASTGIYEALELR                 | 32  | 18 | 10 | 41.21  | b2b7°b7b12°b12y7y11y14y15y18            | 1804.96 | 78.992  | 26044  | 2 | 902.98  | 7.10   |
| P13929 ENOB_HUMAN Beta-enolase                   | 2  |                       | LAQSNWGVVMVSHR                     | 358 | 14 | 3  | 11.09  | b10y7y11*                               | 1541.75 | 61.280  | 5660   | 2 | 771.38  | -11.32 |
| P13929 ENOB_HUMAN Beta-enolase                   | 3  |                       | LAMQEFMILPVGASSFK                  | 162 | 17 | 7  | 43.16  | b5b7b8b11y5y8°y8                        | 1868.98 | 133.615 | 16460  | 2 | 934.99  | 6.40   |
| P13929 ENOB_HUMAN Beta-enolase                   | 4  |                       | FMIELDGTENKSK                      | 92  | 13 | 3  | 25.6   | b8y9y10                                 | 1511.73 | 47.454  | 12224  | 2 | 756.37  | -7.83  |
| P13929 ENOB_HUMAN Beta-enolase                   | 5  |                       | GNPTVEVDLHTAKGR                    | 15  | 15 | 3  | 26.39  | b7b9b13                                 | 1593.84 | 71.989  | 4103   | 3 | 531.95  | 0.38   |
| P13929 ENOB_HUMAN Beta-enolase                   | 6  |                       | YDLDFKSPDDPAR                      | 256 | 13 | 3  | 20.83  | b10y6y12                                | 1538.71 | 60.472  | 2893   | 2 | 769.86  | 0.56   |
| P13929 ENOB_HUMAN Beta-enolase                   | 7  |                       | GVMVSHR                            | 365 | 7  | 0  | 3.57   |                                         | 785.42  | 61.286  | 6262   | 1 | 785.42  | 12.59  |
| P14618 KPYM_HUMAN Pyruvate kinase isozymes M1/M2 | 1  |                       | GADFLVTEVENGGSLGSK                 | 188 | 18 | 6  | 26.81  | b6y2y9y12y13y18                         | 1779.88 | 74.220  | 68588  | 2 | 890.45  | 4.32   |
| P14618 KPYM_HUMAN Pyruvate kinase isozymes M1/M2 | 2  |                       | ITLDNAYMEK                         | 141 | 10 | 9  | 74.81  | b9y2y3y6y7°y7y8y9y10                    | 1197.58 | 53.399  | 49735  | 2 | 599.29  | -1.33  |
| P14618 KPYM_HUMAN Pyruvate kinase isozymes M1/M2 | 3  | Carbamidomethyl+C(6)  | NTGIICIGPASR                       | 43  | 13 | 10 | 100.34 | b4°b4b5b10y4y5y7y8y9y10                 | 1359.71 | 54.269  | 45108  | 2 | 680.36  | 0.00   |
| P14618 KPYM_HUMAN Pyruvate kinase isozymes M1/M2 | 4  | Carbamidomethyl+C(7)  | GIFPVLCKDPVQEAWAEDVDLR             | 467 | 22 | 7  | 51.33  | b2y2y6y7y8y9y14                         | 2557.28 | 90.896  | 42442  | 3 | 853.10  | 2.29   |
| P14618 KPYM_HUMAN Pyruvate kinase isozymes M1/M2 | 5  |                       | GSGTAEVELKK                        | 125 | 11 | 12 | 71.4   | b2°b2b3°b3y1y2y3y4y5y6y7y11             | 1118.61 | 26.853  | 12046  | 2 | 559.81  | 1.86   |
| P14618 KPYM_HUMAN Pyruvate kinase isozymes M1/M2 | 6  |                       | SVETLK                             | 56  | 6  | 4  | 27     | b3°b3y3°y3                              | 676.39  | 39.125  | 90201  | 1 | 676.39  | 1.35   |
| P14618 KPYM_HUMAN Pyruvate kinase isozymes M1/M2 | 7  |                       | APIHAVTR                           | 447 | 8  | 4  | 33.32  | b3y4y5°y5                               | 840.52  | 45.632  | 49201  | 2 | 420.76  | -11.33 |
| P14618 KPYM_HUMAN Pyruvate kinase isozymes M1/M2 | 8  | Carbamidomethyl+C(7)  | AGKPVICATQMLESNIK                  | 319 | 17 | 5  | 33.08  | b3b9b11y5y15                            | 1876.96 | 88.988  | 34940  | 3 | 626.33  | -2.41  |
| P14618 KPYM_HUMAN Pyruvate kinase isozymes M1/M2 | 9  | Carbamidomethyl+C(16) | AEGSDVANAVLDGADCIMLSGETAK          | 342 | 25 | 5  | 32.54  | b3b4y8y11y13                            | 2494.14 | 71.244  | 15918  | 4 | 624.29  | -2.74  |
| P14618 KPYM_HUMAN Pyruvate kinase isozymes M1/M2 | 10 | Carbamidomethyl+C(30) | SKPHSEAGTAFIQTQQLHAAMADTFLEHMCR    | 1   | 31 | 3  | 22.81  | y7y12y13                                | 3513.62 | 80.125  | 15709  | 4 | 879.16  | -7.09  |
| P14618 KPYM_HUMAN Pyruvate kinase isozymes M1/M2 | 11 |                       | DPVQEAWAEDVDLR                     | 475 | 14 | 5  | 31.01  | b4*b4y9y11y12                           | 1642.76 | 63.041  | 15157  | 3 | 548.26  | -6.32  |
| P14618 KPYM_HUMAN Pyruvate kinase isozymes M1/M2 | 12 |                       | GVNLPGAAVDLPVSEK                   | 207 | 17 | 6  | 44.24  | b3b4b6y3y5y13                           | 1636.90 | 69.948  | 12768  | 2 | 818.96  | 8.05   |
| P14618 KPYM_HUMAN Pyruvate kinase isozymes M1/M2 | 13 |                       | GDVVIVLTGWRPGSGFTNTMR              | 505 | 21 | 4  | 19.13  | b4b14y5y10                              | 2263.12 | 91.642  | 3198   | 3 | 755.05  | -18.99 |
| P14618 KPYM_HUMAN Pyruvate kinase isozymes M1/M2 | 14 |                       | LAPITSDPTEATAVGAVEASFK             | 400 | 22 | 5  | 18.37  | b14b17y13°y13y17                        | 2175.09 | 88.937  | 1925   | 3 | 725.70  | -13.58 |
| P14618 KPYM_HUMAN Pyruvate kinase isozymes M1/M2 | 15 |                       | LNFSHGTHEYHAETIK                   | 73  | 16 | 4  | 27.92  | b3b10b14y15                             | 1883.93 | 69.656  | 1511   | 3 | 628.65  | 11.60  |
| P14618 KPYM_HUMAN Pyruvate kinase isozymes M1/M2 | 16 |                       | TATESFASDPILYRPVAVALDTKGP<br>PEIR  | 92  | 28 | 3  | 11.78  | b7b14y19                                | 3017.59 | 81.897  | 141363 | 4 | 755.15  | -1.62  |
| P14618 KPYM_HUMAN Pyruvate kinase isozymes M1/M2 | 17 | Carbamidomethyl+C(16) | AEGSDVANAVLDGADCIMLSGETAKGDYPLEAVR | 342 | 34 | 15 | 124.48 | b6b9b10b11y3y4y5y6y14y15y16y22y24y25y27 | 3494.67 | 95.293  | 63473  | 3 | 1165.56 | 9.29   |
| P14618 KPYM_HUMAN Pyruvate kinase isozymes M1/M2 | 18 | Carbamidomethyl+C(7)  | GIFPVLCKDPVQEAWAEDVDLR             | 467 | 22 | 6  | 40.36  | y7°y7y8y12*y12y13                       | 2557.26 | 118.884 | 24155  | 3 | 853.09  | -6.97  |
| P14618 KPYM_HUMAN Pyruvate kinase isozymes M1/M2 | 19 |                       | FDEILEASDGIMVARGDLGIEIPAEK         | 279 | 26 | 4  | 22.9   | b4b5°b5b17                              | 2788.44 | 83.554  | 18224  | 3 | 930.15  | 12.52  |

|                                                   |    |                                       |                                  |      |    |    |        |                                                                                                               |         |         |        |   |         |        |
|---------------------------------------------------|----|---------------------------------------|----------------------------------|------|----|----|--------|---------------------------------------------------------------------------------------------------------------|---------|---------|--------|---|---------|--------|
| [P14618]KPYM_HUMAN Pyruvate kinase isozymes M1/M2 | 20 |                                       | FGVEQDVDMVFASFIRK                | 230  | 17 | 5  | 27.64  | b14°b14y13y14y16                                                                                              | 1987.98 | 105.579 | 15276  | 3 | 663.33  | -6.39  |
| [P14618]KPYM_HUMAN Pyruvate kinase isozymes M1/M2 | 21 |                                       | EAEAAYHLQLFEELRR                 | 383  | 17 | 6  | 16.47  | b6°b6b13°b13y10*y10                                                                                           | 2088.07 | 90.282  | 1557   | 3 | 696.70  | -6.55  |
| [P14618]KPYM_HUMAN Pyruvate kinase isozymes M1/M2 | 22 | Carbamidomethyl+C(30);Oxidation+M()   | SKPHSEAGTAFIQTQQLHAAMADTFLEHMCR  | 1    | 31 | 5  | 21.96  | b8°b8b10b11y15                                                                                                | 3529.63 | 91.022  | 8035   | 4 | 883.16  | -3.32  |
| [P14618]KPYM_HUMAN Pyruvate kinase isozymes M1/M2 | 23 | Carbamidomethyl+C(16);Oxidation+M(18) | AEGSDVANAVLDGADCIMLSGETAK        | 342  | 25 | 3  | 22.05  | b12b13y5                                                                                                      | 2510.16 | 112.951 | 2817   | 3 | 837.39  | 7.98   |
| [P14618]KPYM_HUMAN Pyruvate kinase isozymes M1/M2 | 24 | Carbamidomethyl+C(3)                  | IICTIGPASR                       | 46   | 10 | 0  | 3.17   |                                                                                                               | 1087.60 | 54.271  | 1932   | 2 | 544.30  | 3.59   |
| [P14649]MYL6B_HUMAN Myosin light chain 6B         | 1  |                                       | ALGQNPTNAEVLK                    | 94   | 13 | 16 | 99.09  | b1b2b3b4b5*b5b12y1y2y3y7y8y9y11*y11y13                                                                        | 1354.73 | 45.648  | 200130 | 2 | 677.87  | -0.99  |
| [P14649]MYL6B_HUMAN Myosin light chain 6B         | 2  | Carbamidomethyl+C(6)                  | ILYSQCGDVMR                      | 83   | 11 | 10 | 71.4   | b2b3y2y3y6y7y8y9y11*y11                                                                                       | 1341.63 | 49.249  | 161891 | 2 | 671.32  | 2.37   |
| [P14649]MYL6B_HUMAN Myosin light chain 6B         | 3  |                                       | AEPAVPQAPQK                      | 35   | 11 | 5  | 41.79  | b3b4b5y5*y5                                                                                                   | 1135.59 | 35.983  | 19294  | 2 | 568.30  | -15.26 |
| [P14649]MYL6B_HUMAN Myosin light chain 6B         | 4  |                                       | VDFETFLPMLQAVAK                  | 121  | 15 | 6  | 38.15  | b8°b8b9°b9b10y8                                                                                               | 1708.89 | 46.489  | 4440   | 3 | 570.30  | -4.43  |
| [P14649]MYL6B_HUMAN Myosin light chain 6B         | 5  |                                       | NRGQGT YEDYLEGFR                 | 136  | 15 | 4  | 32.07  | b7b9y5y6                                                                                                      | 1804.83 | 58.604  | 21605  | 3 | 602.28  | 2.23   |
| [P14649]MYL6B_HUMAN Myosin light chain 6B         | 6  | Carbamidomethyl+C(6)                  | ILYSQCGDVMRALGQNPTNAEVLK         | 83   | 24 | 3  | 12.81  | b9y11y13                                                                                                      | 2677.33 | 136.846 | 7700   | 2 | 1339.17 | -4.83  |
| [P14649]MYL6B_HUMAN Myosin light chain 6B         | 7  |                                       | EAFELFDRVGDGK                    | 70   | 13 | 5  | 25.6   | b12y11°y11y12°y12                                                                                             | 1482.74 | 136.763 | 6831   | 1 | 1482.74 | 14.41  |
| [P18206]VINC_HUMAN Vinculin                       | 1  |                                       | TIESILEPVAQQISHLVIMHEEGEV<br>DGK | 7    | 28 | 34 | 223.1  | b1b2°b2b3°b3b4°b4b5°<br>b5b6°b6b12*b12y2y4y6°<br>y6y7y8y9y11y12y13°y<br>13y14y15y19y21y22°y2<br>2y23y25y26y28 | 3101.54 | 111.323 | 234400 | 4 | 776.14  | -12.28 |
| [P18206]VINC_HUMAN Vinculin                       | 2  |                                       | AQQVSQGLDVLTA                    | 352  | 14 | 18 | 123.08 | b1b2*b2b3b4b7b9*b9b<br>12y2y3y4y8y10y11y12*<br>y12y14                                                         | 1457.80 | 58.525  | 131518 | 2 | 729.40  | 0.59   |
| [P18206]VINC_HUMAN Vinculin                       | 3  |                                       | LLAVAATAPPDAPNREEVFDER           | 607  | 22 | 11 | 35.76  | b2b3b8y1y2y11y14y16*<br>y16y18y22                                                                             | 2381.21 | 62.268  | 116135 | 3 | 794.41  | -1.13  |
| [P18206]VINC_HUMAN Vinculin                       | 4  |                                       | AIPDLTAPVAAVQAAVSNLVR            | 35   | 21 | 18 | 125.89 | b2b4b6°b6b7°b7y2y3y4<br>*y4y5y6y7y8y14y15y16<br>y21                                                           | 2076.16 | 118.596 | 114325 | 3 | 692.73  | -9.17  |
| [P18206]VINC_HUMAN Vinculin                       | 5  |                                       | AVAGNISDPGLQK                    | 802  | 13 | 10 | 97.55  | b2b8y5y6y7y8y9y10y11<br>y13                                                                                   | 1269.68 | 40.913  | 113665 | 2 | 635.34  | -2.02  |
| [P18206]VINC_HUMAN Vinculin                       | 6  |                                       | VLQLTSWDEDAWASK                  | 246  | 15 | 10 | 59.39  | b3b12*b12b13y6°y6y8y<br>11y12y15                                                                              | 1748.86 | 80.008  | 98238  | 2 | 874.93  | 6.14   |
| [P18206]VINC_HUMAN Vinculin                       | 7  |                                       | TNISDEESEQATEMLVHNAQNLM<br>QSVK  | 1076 | 27 | 15 | 68.83  | b2*b2b3b4°b4*b4y5°y5<br>y10y11y13y22y24y25y2<br>7                                                             | 3046.42 | 96.922  | 98142  | 3 | 1016.15 | 4.41   |
| [P18206]VINC_HUMAN Vinculin                       | 8  |                                       | ELTPQVVSAAAR                     | 669  | 11 | 13 | 98.8   | b2b3°b3b10y4y5y6y7y8<br>°y8*y8y9y11                                                                           | 1170.65 | 46.476  | 90591  | 2 | 585.83  | 0.52   |
| [P18206]VINC_HUMAN Vinculin                       | 9  |                                       | ELLPVLISAMK                      | 199  | 11 | 11 | 101.81 | b2°b2b3b4y3y4y5y6y8y<br>9y11                                                                                  | 1213.72 | 91.869  | 83438  | 2 | 607.36  | -1.21  |
| [P18206]VINC_HUMAN Vinculin                       | 10 |                                       | GWLRDPSASPGDAGEQAIR              | 281  | 19 | 8  | 26.1   | b2b9°b9b19y2y3y9y10                                                                                           | 1982.96 | 54.266  | 78060  | 3 | 661.66  | -4.99  |
| [P18206]VINC_HUMAN Vinculin                       | 11 |                                       | VAMANIQPMLVAGATSIAR              | 738  | 20 | 18 | 96.76  | b3b4b5°b5b7°b7b10b1<br>1°b11y1y2y3y7y8°y8y1<br>3y14y20                                                        | 2042.11 | 84.600  | 76458  | 2 | 1021.56 | 9.21   |
| [P18206]VINC_HUMAN Vinculin                       | 12 |                                       | ALASQLQDSLK                      | 570  | 11 | 5  | 36.27  | b2y3y6y9y11                                                                                                   | 1173.64 | 55.190  | 74823  | 2 | 587.33  | -2.18  |
| [P18206]VINC_HUMAN Vinculin                       | 13 |                                       | MTGLVDEAIDTK                     | 708  | 12 | 11 | 102.21 | b2b3b4b5y2y3y5y7y10y<br>11y12                                                                                 | 1292.64 | 58.158  | 71251  | 2 | 646.83  | 1.98   |

|                             |    |                      |                           |      |    |    |        |                                                 |         |         |        |   |         |        |
|-----------------------------|----|----------------------|---------------------------|------|----|----|--------|-------------------------------------------------|---------|---------|--------|---|---------|--------|
| IP18206 VINC_HUMAN Vinculin | 14 |                      | QVATALQNLQTK              | 464  | 12 | 19 | 110.74 | b2b3*b3b5°b5*b5b12y2y3*y3y4y5y6*y6*y6y7y9y10y12 | 1314.74 | 49.208  | 70495  | 2 | 657.87  | 1.21   |
| IP18206 VINC_HUMAN Vinculin | 15 |                      | STVEGIQASVK               | 655  | 11 | 10 | 68.89  | b2°b2y2y3y4y6y7y8°y9y11                         | 1118.59 | 40.552  | 67910  | 2 | 559.80  | -12.22 |
| IP18206 VINC_HUMAN Vinculin | 16 |                      | LVQAAQMLQSDPYSPAR         | 87   | 18 | 14 | 89.77  | b2b10b13b15°b15y1y3y7y9y10y12y13y14y18          | 1974.02 | 66.274  | 67310  | 2 | 987.52  | 5.94   |
| IP18206 VINC_HUMAN Vinculin | 17 |                      | MQEAMTQEVSDVFSDTTPIK      | 586  | 21 | 6  | 23.66  | b1y2y3y8y9y21                                   | 2358.11 | 81.015  | 60784  | 2 | 1179.56 | 12.63  |
| IP18206 VINC_HUMAN Vinculin | 18 |                      | AGEVINQPMMAAR             | 889  | 14 | 15 | 124.33 | b3b4b6b7°b7b13°b13°b13y3y4y5y6y9y11y14          | 1518.73 | 59.166  | 59445  | 2 | 759.87  | 4.82   |
| IP18206 VINC_HUMAN Vinculin | 19 |                      | ETVQTTEDQILKR             | 59   | 13 | 13 | 78.22  | b2°b2y1y2y3y4y5*y5y7y8°y8y9y13                  | 1560.81 | 47.563  | 55308  | 3 | 520.94  | -10.17 |
| IP18206 VINC_HUMAN Vinculin | 20 |                      | WIDNPTVDDR                | 502  | 10 | 10 | 55.94  | b3b7°b7y2y6°y6y7°y7y8y10                        | 1230.58 | 48.682  | 52905  | 2 | 615.79  | 0.20   |
| IP18206 VINC_HUMAN Vinculin | 21 |                      | TISPMVMDAK                | 792  | 10 | 6  | 27.12  | b6y2y4°y4y7y10                                  | 1092.54 | 51.775  | 46533  | 2 | 546.77  | -5.03  |
| IP18206 VINC_HUMAN Vinculin | 22 |                      | NQWIDNVEK                 | 699  | 9  | 5  | 38.48  | y4y5y7*y7y9                                     | 1145.55 | 50.460  | 43615  | 2 | 573.28  | -5.33  |
| IP18206 VINC_HUMAN Vinculin | 23 |                      | GVGQAAIR                  | 512  | 8  | 4  | 33.32  | b5y4y5*y5                                       | 771.45  | 39.135  | 40940  | 2 | 386.23  | 6.96   |
| IP18206 VINC_HUMAN Vinculin | 24 |                      | LTDELAPPKPLPEGEVPPRPPPEEK | 853  | 28 | 4  | 17.48  | b11y11y16y22                                    | 3023.61 | 61.055  | 27774  | 3 | 1008.54 | -0.32  |
| IP18206 VINC_HUMAN Vinculin | 25 |                      | GQGSSPVAMQK               | 341  | 11 | 14 | 79.93  | b2°b2b4°b4b7°b7b8°b8y1y4y6y7y9y11               | 1089.53 | 26.873  | 22860  | 2 | 545.27  | -1.12  |
| IP18206 VINC_HUMAN Vinculin | 26 |                      | ALASIDSK                  | 268  | 8  | 5  | 48.88  | y2y3y5y7y8                                      | 804.44  | 31.473  | 20533  | 2 | 402.72  | -11.15 |
| IP18206 VINC_HUMAN Vinculin | 27 |                      | DPSASPGDAGEQAIR           | 285  | 15 | 10 | 63.74  | b7b10y7*y7y10y11y12*y12y14y15                   | 1470.69 | 35.804  | 18090  | 2 | 735.85  | 3.74   |
| IP18206 VINC_HUMAN Vinculin | 28 |                      | NPGNQAAYEHFETMK           | 684  | 15 | 6  | 44.25  | b7y8y9y10y14y15                                 | 1736.78 | 47.621  | 10902  | 2 | 868.89  | 6.54   |
| IP18206 VINC_HUMAN Vinculin | 29 |                      | GNDIIAAAK                 | 983  | 9  | 9  | 45.25  | b2b5°b5b8°b8°b8b9y4y7                           | 872.48  | 26.963  | 8900   | 2 | 436.74  | -4.34  |
| IP18206 VINC_HUMAN Vinculin | 30 | Carbamidomethyl-C(5) | IAELCDDPKER               | 417  | 11 | 4  | 31.5   | y4y7y8y11                                       | 1345.64 | 33.078  | 7112   | 3 | 449.22  | -4.72  |
| IP18206 VINC_HUMAN Vinculin | 31 |                      | SLLDASEEAIK               | 720  | 11 | 5  | 36.27  | y8y9y10°y10y11                                  | 1175.61 | 61.543  | 6534   | 2 | 588.31  | -5.09  |
| IP18206 VINC_HUMAN Vinculin | 32 |                      | GALAEAR                   | 409  | 7  | 3  | 40.7   | b3b5y6                                          | 687.38  | 28.174  | 5208   | 1 | 687.38  | 3.46   |
| IP18206 VINC_HUMAN Vinculin | 33 |                      | VREAFQPQEPDFPPPPDLEQLR    | 830  | 23 | 4  | 13.16  | b1b9y3y7                                        | 2702.36 | 136.436 | 2138   | 3 | 901.46  | 0.00   |
| IP18206 VINC_HUMAN Vinculin | 34 |                      | AVANSRPAK                 | 479  | 9  | 4  | 30.7   | b3b5y7*y7                                       | 913.53  | 57.398  | 80615  | 2 | 457.27  | 9.22   |
| IP18206 VINC_HUMAN Vinculin | 35 |                      | GILEYLTVAEVVETMEDLVYTK    | 139  | 23 | 3  | 22.19  | b3y9y10                                         | 2616.33 | 124.333 | 46126  | 3 | 872.78  | -3.08  |
| IP18206 VINC_HUMAN Vinculin | 36 |                      | MALLMAEMSR                | 993  | 10 | 4  | 41.39  | b3b6y6y7                                        | 1152.56 | 72.947  | 41200  | 2 | 576.78  | 1.80   |
| IP18206 VINC_HUMAN Vinculin | 37 |                      | TDAGFTLR                  | 1117 | 8  | 3  | 41.1   | y3y5y6                                          | 880.45  | 47.879  | 39571  | 2 | 440.73  | -6.17  |
| IP18206 VINC_HUMAN Vinculin | 38 |                      | GILSGTSDLLTLFDEAEVR       | 113  | 19 | 4  | 38.35  | y5y6y7y11                                       | 2036.06 | 101.127 | 26084  | 2 | 1018.53 | 3.06   |
| IP18206 VINC_HUMAN Vinculin | 39 |                      | AANFENHSGK                | 629  | 10 | 5  | 54.69  | b3b7b8y7y8                                      | 1074.50 | 65.048  | 22366  | 2 | 537.75  | -0.91  |
| IP18206 VINC_HUMAN Vinculin | 40 |                      | VDQLTAQLADLAAR            | 547  | 14 | 3  | 19.46  | b12y3y5                                         | 1484.82 | 75.537  | 17833  | 2 | 742.91  | 5.67   |
| IP18206 VINC_HUMAN Vinculin | 41 |                      | IFVTTK                    | 210  | 6  | 1  | 13.7   | y5                                              | 708.42  | 35.928  | 12673  | 2 | 354.72  | -8.01  |
| IP18206 VINC_HUMAN Vinculin | 42 |                      | DEEFPEQK                  | 881  | 8  | 4  | 33.32  | b3b4y4*y4                                       | 1021.44 | 32.091  | 3032   | 1 | 1021.44 | -4.96  |
| IP18206 VINC_HUMAN Vinculin | 43 |                      | LLAVAATAPPDAPNR           | 607  | 15 | 4  | 29.7   | b8y3y8y11                                       | 1476.81 | 51.595  | 2940   | 3 | 492.94  | -8.02  |
| IP18206 VINC_HUMAN Vinculin | 44 |                      | LANVMMGPYRQDLLAK          | 528  | 16 | 3  | 25.7   | b3b4b7                                          | 1819.97 | 116.863 | 743926 | 3 | 607.33  | 9.93   |
| IP18206 VINC_HUMAN Vinculin | 45 |                      | KIDAAQNWLADPNGGPEGEEQIR   | 386  | 23 | 10 | 58.99  | b11b13°b13b14b15°b15y6y10y12y14                 | 2508.19 | 62.427  | 87311  | 3 | 836.73  | -9.73  |
| IP18206 VINC_HUMAN Vinculin | 46 |                      | ARMQEAMTQEVSDVFSDTTPIK    | 584  | 23 | 4  | 20.32  | b3b7b11y3                                       | 2585.20 | 72.916  | 22117  | 3 | 862.41  | -6.71  |
| IP18206 VINC_HUMAN Vinculin | 47 |                      | EVENSEDPKFR               | 769  | 11 | 6  | 50.82  | y3y4y8y9°y9*y9                                  | 1349.62 | 29.821  | 16174  | 3 | 450.54  | -11.03 |
| IP18206 VINC_HUMAN Vinculin | 48 |                      | MTGLVDEAIDTKSLLDASEEAIK   | 708  | 23 | 3  | 19.57  | y3y7y9                                          | 2449.23 | 70.617  | 13574  | 3 | 817.08  | -5.18  |
| IP18206 VINC_HUMAN Vinculin | 49 |                      | EAVKAASDELSK              | 780  | 12 | 5  | 47.53  | b3b9b11y6y8                                     | 1247.63 | 59.207  | 9656   | 3 | 416.55  | -11.84 |
| IP18206 VINC_HUMAN Vinculin | 50 |                      | GNDIIAAAKR                | 983  | 10 | 3  | 37.12  | y4y5y6                                          | 1028.58 | 33.061  | 5692   | 2 | 514.79  | -9.02  |
| IP18206 VINC_HUMAN Vinculin | 51 | Carbamidomethyl-C(6) | EILGTCKMLGQMTDQVADLR      | 319  | 20 | 7  | 19.98  | b8°b8b10°b10y9*y9y14                            | 2279.09 | 116.302 | 4423   | 3 | 760.37  | -14.03 |



|                                                           |    |                      |                                              |     |    |    |        |                                                              |         |         |        |   |         |        |
|-----------------------------------------------------------|----|----------------------|----------------------------------------------|-----|----|----|--------|--------------------------------------------------------------|---------|---------|--------|---|---------|--------|
| P18206 VINC_HUMAN Vinculin                                | 52 |                      | KLEAMTNSK                                    | 372 | 9  | 3  | 30.7   | b8y5y7                                                       | 1021.53 | 21.728  | 4107   | 2 | 511.27  | -1.91  |
| P18206 VINC_HUMAN Vinculin                                | 53 |                      | NLPGPGMTKMAK                                 | 162 | 11 | 5  | 37.02  | b4b5*b5b10y6                                                 | 1147.59 | 35.927  | 3677   | 2 | 574.30  | -5.21  |
| P18206 VINC_HUMAN Vinculin                                | 54 |                      | DYLIDGSRGILSGTSDLLLTDFDEAE<br>VR             | 105 | 27 | 3  | 11.99  | b8b13y5                                                      | 2955.49 | 103.368 | 2376   | 3 | 985.83  | -2.31  |
| P18206 VINC_HUMAN Vinculin                                | 55 | Phosphoryl STY(8)    | ELTPQVVSAAAR                                 | 669 | 11 | 6  | 35.59  | b3*b3b9*b9y3y6                                               | 1250.60 | 99.607  | 27804  | 2 | 625.80  | -5.08  |
| P18206 VINC_HUMAN Vinculin                                | 56 | Phosphoryl STY(14)   | GILEYLTVAEUVETMEDLVITYTK                     | 139 | 23 | 5  | 24     | b7y3°y3y8y9                                                  | 2696.26 | 104.163 | 7858   | 4 | 674.82  | -11.32 |
| P18206 VINC_HUMAN Vinculin                                | 57 | Phosphoryl STY(10)   | LVQAAQMLQSDPYSVPAR                           | 87  | 18 | 3  | 24.65  | b9b10_HPO3<br>b10b13_H3PO4<br>b13_HPO3 b13                   | 2053.98 | 72.065  | 6905   | 3 | 685.33  | 7.61   |
| P18206 VINC_HUMAN Vinculin                                | 58 | Phosphoryl STY(5)    | AQQVSQGLDVLTAQ                               | 352 | 14 | 6  | 58.7   | b3b4b11y10y11y12                                             | 1537.75 | 108.672 | 2235   | 2 | 769.38  | -0.56  |
| P18206 VINC_HUMAN Vinculin                                | 59 | Phosphoryl STY(6)    | SLGEISALTSK                                  | 433 | 11 | 4  | 27.52  | b4y6y7°y7                                                    | 1185.57 | 99.577  | 1634   | 3 | 395.86  | 5.25   |
| P18206 VINC_HUMAN Vinculin                                | 60 | Oxidation+M(19)      | TIESILEPVAQQISHLVIMHEEGEV<br>DGK             | 7   | 28 | 6  | 26.46  | b3b5b12y4y12y23                                              | 3117.55 | 107.984 | 19392  | 4 | 780.14  | -10.02 |
| P18206 VINC_HUMAN Vinculin                                | 61 | Oxidation+M(5)       | MLGQMTDQVADLR                                | 326 | 13 | 5  | 34.34  | b3y6y8y10°y10                                                | 1493.72 | 52.000  | 10846  | 3 | 498.58  | 10.87  |
| P18206 VINC_HUMAN Vinculin                                | 62 | Oxidation+M(10)      | VAMANIQQMLVAGATSIAR                          | 738 | 20 | 6  | 30.97  | b8*b8b10b13b14*b14                                           | 2058.07 | 97.784  | 9744   | 3 | 686.70  | -5.10  |
| P18206 VINC_HUMAN Vinculin                                | 63 | Oxidation+M(7)       | LVQAAQMLQSDPYSVPARDYLID<br>GSR               | 87  | 26 | 4  | 22.9   | y4y10°y10y11                                                 | 2909.42 | 101.267 | 2880   | 3 | 970.48  | -7.97  |
| P18206 VINC_HUMAN Vinculin                                | 64 | Oxidation+M(5)       | TISPMVMDAK                                   | 792 | 10 | 3  | 34.11  | y5y6y8                                                       | 1108.54 | 84.437  | 2100   | 1 | 1108.54 | -2.20  |
| P18206 VINC_HUMAN Vinculin                                | 65 |                      | PDLTAPVAQVAAVSNLVR                           | 37  | 19 | 7  | 44.67  | b4°b4b5°b5b7b9b10                                            | 1892.04 | 118.615 | 3676   | 3 | 631.35  | -12.00 |
| P18206 VINC_HUMAN Vinculin                                | 66 |                      | PSASPGDAGEQAIR                               | 286 | 14 | 0  | 3.97   |                                                              | 1355.65 | 35.765  | 2280   | 3 | 452.55  | -3.87  |
| P18206 VINC_HUMAN Vinculin                                | 67 |                      | ETVQTTEDQILKR                                | 59  | 13 | 0  | 3.17   |                                                              | 1542.81 | 47.572  | 21914  | 3 | 514.94  | 1.19   |
| P18206 VINC_HUMAN Vinculin                                | 68 |                      | MQEAMTQEVSDVFSDDTTPIK                        | 586 | 21 | 0  | 6.35   |                                                              | 2341.08 | 80.978  | 4425   | 3 | 781.03  | 13.24  |
| P19105 MRLC3_HUMAN Myosin<br>regulatory light chain MRLC3 | 1  |                      | LNGTDPEDVIR                                  | 92  | 11 | 8  | 68.89  | y1y3y4y6y8y9°y9y11                                           | 1228.62 | 49.380  | 142462 | 2 | 614.81  | 1.49   |
| P19105 MRLC3_HUMAN Myosin<br>regulatory light chain MRLC3 | 2  |                      | GNFNIEFTR                                    | 150 | 10 | 10 | 95.1   | b2*b2b3b5b9y4y5y7y8y<br>10                                   | 1260.60 | 67.513  | 120827 | 2 | 630.80  | 0.10   |
| P19105 MRLC3_HUMAN Myosin<br>regulatory light chain MRLC3 | 3  |                      | ATSNVFAMFDQSQIQEFK                           | 16  | 18 | 9  | 34.97  | b5*b5y2y3°y3y4y6y10y<br>18                                   | 2091.00 | 90.513  | 104332 | 2 | 1046.01 | 9.11   |
| P19105 MRLC3_HUMAN Myosin<br>regulatory light chain MRLC3 | 4  |                      | FTDEEVDLYR                                   | 132 | 11 | 8  | 65.88  | b11y2y5y7y8y9y10y11                                          | 1415.64 | 59.898  | 88805  | 2 | 708.32  | 3.10   |
| P19105 MRLC3_HUMAN Myosin<br>regulatory light chain MRLC3 | 5  |                      | ELLTTMGDR                                    | 123 | 9  | 6  | 54.8   | b9y3y5y6y7y9                                                 | 1035.51 | 49.455  | 30292  | 2 | 518.26  | -3.54  |
| P19105 MRLC3_HUMAN Myosin<br>regulatory light chain MRLC3 | 6  |                      | ELLTTMGDRFTDEEVDLYR                          | 123 | 20 | 3  | 23.93  | b8b9b11                                                      | 2432.12 | 116.303 | 49489  | 3 | 811.38  | -3.91  |
| P19105 MRLC3_HUMAN Myosin<br>regulatory light chain MRLC3 | 7  |                      | NPTDEYLDAMMNEAPGPINFMTF<br>LTMFGEKLNQTDPEVIR | 62  | 41 | 5  | 14.16  | b16y9°y9y23y30                                               | 4634.11 | 90.181  | 15319  | 4 | 1159.28 | -2.74  |
| P19105 MRLC3_HUMAN Myosin<br>regulatory light chain MRLC3 | 8  |                      | EAFNMIDQNRDGFIDK                             | 34  | 16 | 3  | 17.33  | b3b9y10                                                      | 1912.90 | 47.477  | 10630  | 3 | 638.30  | 7.15   |
| P19105 MRLC3_HUMAN Myosin<br>regulatory light chain MRLC3 | 9  |                      | KGNFNIEFTR                                   | 149 | 11 | 5  | 24.51  | b6b9°b9y9*y9                                                 | 1388.70 | 37.919  | 4838   | 3 | 463.57  | 2.29   |
| P23528 COF1_HUMAN Cofilin-1                               | 1  |                      | KEDLVFIFWAPESAPLK                            | 95  | 17 | 11 | 102.82 | b5b6b7b9b10y3y6y7y8y<br>9y17                                 | 1990.05 | 98.270  | 285289 | 3 | 664.02  | -6.93  |
| P23528 COF1_HUMAN Cofilin-1                               | 2  |                      | NIILEEGKEILVGDVGQTVDDPYA<br>TFVK             | 45  | 28 | 6  | 20.76  | b3b12b24y3y9y28                                              | 3062.60 | 93.429  | 279401 | 3 | 1021.54 | 2.87   |
| P23528 COF1_HUMAN Cofilin-1                               | 3  |                      | YALYDATYETK                                  | 81  | 11 | 11 | 87.71  | b2b3y2y4y5°y5y7y8y9y<br>10y11                                | 1337.63 | 53.194  | 149364 | 2 | 669.32  | -0.64  |
| P23528 COF1_HUMAN Cofilin-1                               | 4  | Carbamidomethyl+C(5) | AVLFLCSEDKK                                  | 34  | 11 | 13 | 101.02 | b2b3y2y3y4y5°y5y6y7°<br>y7y8y9y11                            | 1309.66 | 58.185  | 141492 | 3 | 437.23  | -14.26 |
| P23528 COF1_HUMAN Cofilin-1                               | 5  |                      | EILVGDVGQTVDDPYATFVK                         | 53  | 20 | 20 | 164.48 | b2°b2b3b4b6°b6b7b16b<br>17y3y4y7y8y10y11y14y<br>16*y16y17y20 | 2166.12 | 81.669  | 122227 | 2 | 1083.56 | 8.79   |
| P23528 COF1_HUMAN Cofilin-1                               | 6  | Carbamidomethyl+C(7) | MLPKDKCR                                     | 73  | 8  | 5  | 41.1   | b2y2y4y5y6                                                   | 1034.47 | 22.137  | 15165  | 2 | 517.74  | -3.78  |
| P23528 COF1_HUMAN Cofilin-1                               | 7  |                      | NIILEEGK                                     | 45  | 8  | 4  | 41.1   | y3°y3y5y6                                                    | 915.51  | 45.021  | 72093  | 2 | 458.26  | -5.53  |

|                                                         |    |                                              |                                      |     |    |    |       |                                                               |         |         |        |   |         |        |
|---------------------------------------------------------|----|----------------------------------------------|--------------------------------------|-----|----|----|-------|---------------------------------------------------------------|---------|---------|--------|---|---------|--------|
| P23528 COF1_HUMAN Cofilin-1                             | 8  |                                              | EDLVFIFWAPESAPLK                     | 96  | 16 | 3  | 17.33 | b4b12y13                                                      | 1861.98 | 93.278  | 18158  | 2 | 931.50  | 5.77   |
| P23528 COF1_HUMAN Cofilin-1                             | 9  | Carbamidomethyl+C(7)                         | HELQANCYEEVK                         | 132 | 12 | 5  | 32.46 | b3°b3b6y5y7                                                   | 1519.71 | 36.069  | 5257   | 2 | 760.36  | 17.51  |
| P23528 COF1_HUMAN Cofilin-1                             | 10 | Carbamidomethyl+C(2)                         | DCRYALYDATYETK                       | 78  | 14 | 5  | 19.46 | b10y5°y5y12°y12                                               | 1768.79 | 60.555  | 140297 | 2 | 884.90  | 3.86   |
| P23528 COF1_HUMAN Cofilin-1                             | 11 | Carbamidomethyl+C(7)                         | HELQANCYEEVKDR                       | 132 | 14 | 5  | 38.72 | b6b7y10y11*y11                                                | 1790.82 | 93.022  | 2590   | 2 | 895.91  | 3.48   |
| P23528 COF1_HUMAN Cofilin-1                             | 12 | Phosphoryl STY()                             | EDLVFIFWAPESAPLK                     | 96  | 16 | 5  | 17.33 | b11°b11b13y8_H3PO4<br>y8°y8                                   | 1941.90 | 71.184  | 3243   | 2 | 971.46  | -14.08 |
| P23528 COF1_HUMAN Cofilin-1                             | 13 | Phosphoryl STY(8)                            | MASGVAVSDGVIK                        | 0   | 13 | 5  | 47.64 | b6y7y10y11y12                                                 | 1313.62 | 136.318 | 2454   | 1 | 1313.62 | 11.06  |
| P23528 COF1_HUMAN Cofilin-1                             | 14 | Carbamidomethyl+C(3)                         | LFCLSEDKK                            | 36  | 9  | 1  | 7.9   | b3                                                            | 1139.58 | 58.158  | 77471  | 2 | 570.29  | 0.21   |
| P23528 COF1_HUMAN Cofilin-1                             | 15 | Carbamidomethyl+C(4)                         | VLFLSEDKK                            | 35  | 10 | 0  | 2.38  |                                                               | 1238.64 | 58.216  | 12031  | 2 | 619.83  | -0.89  |
| P23528 COF1_HUMAN Cofilin-1                             | 16 |                                              | PESAPLK                              | 105 | 7  | 2  | 7.27  | b4°b4                                                         | 741.41  | 98.247  | 5814   | 1 | 741.41  | -8.23  |
| P23528 COF1_HUMAN Cofilin-1                             | 17 |                                              | EILVGDVGGQTVDD                       | 53  | 13 | 1  | 7.49  | y7                                                            | 1359.65 | 81.658  | 2577   | 2 | 680.33  | -9.61  |
| P24071 FCAR_HUMAN Immunoglobulin alpha Fc receptor      | 1  | Carbamidomethyl+C(14)                        | GLVLMPGENISLTCSSAHIPFDR              | 132 | 23 | 18 | 72.49 | b2b3b4b9°b9b14*b14b1<br>5b17°b17*b17y4°y4y14<br>°y14y19y21y23 | 2514.24 | 100.420 | 772617 | 3 | 838.75  | -1.55  |
| P24071 FCAR_HUMAN Immunoglobulin alpha Fc receptor      | 2  |                                              | IQAQEGDFPMPFISAK                     | 18  | 16 | 8  | 45.69 | b3b13b15°b15y5y12°y1<br>2y14                                  | 1778.86 | 81.599  | 9113   | 3 | 593.63  | -8.44  |
| P24071 FCAR_HUMAN Immunoglobulin alpha Fc receptor      | 3  |                                              | FWNETDPEFVIDHMDANK                   | 76  | 18 | 4  | 21.98 | b10b13y5y14                                                   | 2208.01 | 69.749  | 7591   | 4 | 552.76  | 19.57  |
| P24071 FCAR_HUMAN Immunoglobulin alpha Fc receptor      | 4  |                                              | EGELSLPQHQSGEHPANFSLGPVD<br>LNVSGIYR | 160 | 32 | 6  | 24.66 | b5°b5b6y4y7*y7                                                | 3447.68 | 119.751 | 2225   | 3 | 1149.90 | -3.19  |
| P24071 FCAR_HUMAN Immunoglobulin alpha Fc receptor      | 5  |                                              | IQAQEGDFPMPFISAKSSPVIPLDG<br>SVK     | 18  | 28 | 8  | 45.99 | b5b7b8b13b14b16y6°y6                                          | 2958.49 | 84.592  | 126699 | 4 | 740.38  | -14.03 |
| P24071 FCAR_HUMAN Immunoglobulin alpha Fc receptor      | 6  | Carbamidomethyl+C(14)<br>;Phosphoryl STY(11) | GLVLMPGENISLTCSSAHIPFDR              | 132 | 23 | 4  | 17.68 | b11b13y3y12                                                   | 2594.22 | 117.850 | 10425  | 3 | 865.41  | 6.78   |
| P24071 FCAR_HUMAN Immunoglobulin alpha Fc receptor      | 7  | Carbamidomethyl+C(12)                        | VLMPGENISLTCSSAHIPFDR                | 134 | 21 | 1  | 7.89  | b12                                                           | 2344.11 | 100.433 | 4620   | 4 | 586.78  | -13.96 |
| P24071 FCAR_HUMAN Immunoglobulin alpha Fc receptor      | 8  | Carbamidomethyl+C(10)                        | MPGENISLTCSSAHIPFDR                  | 136 | 19 | 3  | 19.57 | b5b7b15                                                       | 2131.97 | 100.352 | 4081   | 3 | 711.33  | -8.82  |
| P24844 MYL9_HUMAN Myosin regulatory light polypeptide 9 | 1  |                                              | LNGTDPEDVIR                          | 93  | 11 | 8  | 68.89 | y1y3y4y6y8y9°y9y11                                            | 1228.62 | 49.380  | 142462 | 2 | 614.81  | 1.49   |
| P24844 MYL9_HUMAN Myosin regulatory light polypeptide 9 | 2  |                                              | ATSNVFMFDQSQIQEFK                    | 17  | 18 | 9  | 34.97 | b5*b5y2y3°y3y4y6y10y<br>18                                    | 2091.00 | 90.513  | 104332 | 2 | 1046.01 | 9.11   |
| P24844 MYL9_HUMAN Myosin regulatory light polypeptide 9 | 3  |                                              | GNFNHYVEFTR                          | 151 | 10 | 6  | 43.43 | b2*b2b6y4y5y6                                                 | 1246.58 | 62.803  | 44423  | 2 | 623.80  | -0.98  |
| P24844 MYL9_HUMAN Myosin regulatory light polypeptide 9 | 4  |                                              | ELLTTMGDR                            | 124 | 9  | 6  | 54.8  | b9y3y5y6y7y9                                                  | 1035.51 | 49.455  | 30292  | 2 | 518.26  | -3.54  |
| P24844 MYL9_HUMAN Myosin regulatory light polypeptide 9 | 5  |                                              | FTDEEVDEMYR                          | 133 | 11 | 5  | 68.89 | y3y4y5y7y10                                                   | 1433.62 | 54.603  | 17662  | 2 | 717.31  | 21.29  |
| P24844 MYL9_HUMAN Myosin regulatory light polypeptide 9 | 6  |                                              | EAFNMIDQNR                           | 35  | 10 | 6  | 48.2  | b3y5°y5*y5y7y9                                                | 1237.57 | 28.132  | 2291   | 2 | 619.29  | 9.47   |
| P24844 MYL9_HUMAN Myosin regulatory light polypeptide 9 | 7  |                                              | EDLHDMLASLGK                         | 51  | 12 | 4  | 29.67 | b8b10b11°b11                                                  | 1328.62 | 60.658  | 1618   | 3 | 443.55  | -21.04 |
| P24844 MYL9_HUMAN Myosin regulatory light polypeptide 9 | 8  |                                              | ELLTTMGDRFTDEEVDEMYR                 | 124 | 20 | 3  | 23.93 | b8b9b11                                                       | 2450.06 | 116.315 | 1780   | 4 | 613.27  | -8.67  |
| P30041 PRDX6_HUMAN Peroxiredoxin-6                      | 1  | Carbamidomethyl+C(6)                         | DFTPVCTTELGR                         | 41  | 12 | 6  | 34.53 | b2b4y6y9y10y12                                                | 1395.67 | 57.948  | 43044  | 2 | 698.34  | 5.95   |
| P30041 PRDX6_HUMAN Peroxiredoxin-6                      | 2  |                                              | LIALSIDSVEDHLAWSK                    | 67  | 17 | 5  | 26.39 | b3y1y3y11y15                                                  | 1897.00 | 86.478  | 31943  | 3 | 633.00  | -5.73  |
| P30041 PRDX6_HUMAN Peroxiredoxin-6                      | 3  |                                              | VATPVDWK                             | 174 | 8  | 4  | 41.1  | y4°y4y5y7                                                     | 915.48  | 31.221  | 23128  | 2 | 458.24  | -11.87 |
| P30041 PRDX6_HUMAN Peroxiredoxin-6                      | 4  |                                              | ELAILLGMLDPAEKDEK                    | 108 | 17 | 3  | 23.88 | y3y8y13                                                       | 1884.98 | 95.169  | 21587  | 3 | 629.00  | -7.84  |

|                                                    |    |                                                |                                    |      |    |    |        |                                                                                 |         |         |        |   |         |        |
|----------------------------------------------------|----|------------------------------------------------|------------------------------------|------|----|----|--------|---------------------------------------------------------------------------------|---------|---------|--------|---|---------|--------|
| P30041 PRDX6_HUMAN Peroxiredoxin-6                 | 5  | Carbamidomethyl+C(23);Phosphoryl STY(8)        | FHDFLGDSWGILFSHPDRDFTPVCT<br>TELGR | 24   | 29 | 5  | 17.06  | b6y7°y7y12_H3PO4<br>y12_HPO3 y12y21                                             | 3487.59 | 119.753 | 2003   | 3 | 1163.20 | 2.10   |
| P30041 PRDX6_HUMAN Peroxiredoxin-6                 | 6  |                                                | LIALSIDSVEDHLAW                    | 67   | 15 | 2  | 20.95  | y4y5                                                                            | 1681.87 | 86.391  | 52310  | 3 | 561.30  | -5.30  |
| P34931 HS71L_HUMAN Heat shock 70<br>kDa protein 1L | 1  |                                                | VEIANDQGNR                         | 27   | 11 | 8  | 64.41  | b2b3b7y4y6y7y8y11                                                               | 1228.62 | 36.891  | 58804  | 2 | 614.82  | -2.58  |
| P34931 HS71L_HUMAN Heat shock 70<br>kDa protein 1L | 2  |                                                | TTPSYVAFTDTER                      | 38   | 13 | 10 | 62.78  | b1°b1b5b9y3y6y9y11°y<br>11y13                                                   | 1487.71 | 55.692  | 51609  | 2 | 744.36  | 2.71   |
| P34931 HS71L_HUMAN Heat shock 70<br>kDa protein 1L | 3  |                                                | SINPDEAVAYGAAVQAAILMGDK            | 363  | 23 | 6  | 23.25  | b9b13b14°b14b16°y23                                                             | 2304.15 | 77.541  | 28094  | 2 | 1152.58 | 0.32   |
| P34931 HS71L_HUMAN Heat shock 70<br>kDa protein 1L | 4  | Carbamidomethyl+C(1)                           | CNELLSWLEVNQLAEKDEFDHK             | 575  | 22 | 8  | 51.58  | b5b8°b8b9°b9y6y7y8                                                              | 2717.28 | 136.294 | 3754   | 2 | 1359.15 | -1.26  |
| P34931 HS71L_HUMAN Heat shock 70<br>kDa protein 1L | 5  |                                                | NQVAMNPQNTVFDK                     | 58   | 15 | 5  | 26.05  | b1b6b9y8y11                                                                     | 1676.80 | 106.441 | 1507   | 3 | 559.61  | -2.26  |
| P34931 HS71L_HUMAN Heat shock 70<br>kDa protein 1L | 6  |                                                | TLSSSTQANLEIDSLYEGIDFYTSIT<br>R    | 274  | 27 | 3  | 8.49   | b13°b13y13                                                                      | 3024.45 | 110.859 | 1507   | 3 | 1008.82 | -6.62  |
| P34931 HS71L_HUMAN Heat shock 70<br>kDa protein 1L | 7  | Carbamidomethyl+C(6);<br>Carbamidomethyl+C(11) | LYQGGCTGPACGTGYVGRPATG<br>PTIEEVD  | 611  | 30 | 9  | 31.91  | b3b8b10y3y10°y10y15°<br>y15y17                                                  | 3080.44 | 111.499 | 29411  | 4 | 770.87  | 9.67   |
| P34931 HS71L_HUMAN Heat shock 70<br>kDa protein 1L | 8  |                                                | ETAEAFGLHPVTNAVITVPAYFND<br>SQR    | 130  | 27 | 6  | 35.79  | b3b5b10b12b16y4                                                                 | 2947.50 | 106.344 | 9078   | 3 | 983.17  | 13.92  |
| P34931 HS71L_HUMAN Heat shock 70<br>kDa protein 1L | 9  |                                                | MVLDAEK                            | 519  | 7  | 4  | 37.69  | b4y3°y3y4                                                                       | 805.42  | 38.091  | 5986   | 2 | 403.22  | 13.41  |
| P34931 HS71L_HUMAN Heat shock 70<br>kDa protein 1L | 10 |                                                | ISESDK                             | 563  | 6  | 3  | 30.01  | b3b5°b5                                                                         | 678.33  | 31.359  | 5554   | 1 | 678.33  | -5.49  |
| P34931 HS71L_HUMAN Heat shock 70<br>kDa protein 1L | 11 |                                                | FDLTGIPPAPR                        | 460  | 11 | 4  | 36.27  | b3b5°b5b7                                                                       | 1183.64 | 62.977  | 5115   | 3 | 395.22  | -2.37  |
| P34931 HS71L_HUMAN Heat shock 70<br>kDa protein 1L | 12 |                                                | NALESYAFNMK                        | 541  | 11 | 9  | 60.61  | b4°b4b8°b8b9y3y4y10°<br>y10                                                     | 1287.60 | 108.846 | 3324   | 2 | 644.30  | -1.99  |
| P34931 HS71L_HUMAN Heat shock 70<br>kDa protein 1L | 13 |                                                | IINEPTAAAIAYGLDK                   | 173  | 16 | 3  | 17.33  | b4b12y5                                                                         | 1659.87 | 69.882  | 2834   | 3 | 553.96  | -17.72 |
| P34931 HS71L_HUMAN Heat shock 70<br>kDa protein 1L | 14 |                                                | GVPQIEVTFDIDANGILNVTATDK           | 471  | 24 | 5  | 12.81  | b10°b10b12y13*y13                                                               | 2530.25 | 128.144 | 1723   | 3 | 844.09  | -21.52 |
| P34931 HS71L_HUMAN Heat shock 70<br>kDa protein 1L | 15 |                                                | LLQDYFNDRDLNK                      | 350  | 13 | 4  | 34.34  | b3b9b11y11                                                                      | 1595.81 | 61.325  | 31953  | 2 | 798.41  | -3.37  |
| P34931 HS71L_HUMAN Heat shock 70<br>kDa protein 1L | 16 |                                                | GENKAFYEEISSMVLTK                  | 110  | 18 | 7  | 26.81  | b5°b5b15b16°b16°b16y<br>13                                                      | 2042.99 | 74.163  | 10930  | 3 | 681.67  | -9.44  |
| P34931 HS71L_HUMAN Heat shock 70<br>kDa protein 1L | 17 | Carbamidomethyl+C(19)                          | MATAKGIAIGIDLGTYSYCVGVFQ<br>HGK    | 0    | 27 | 3  | 11.99  | b3b12y5                                                                         | 2795.40 | 74.820  | 4796   | 4 | 699.61  | -8.03  |
| P34931 HS71L_HUMAN Heat shock 70<br>kDa protein 1L | 18 |                                                | ATAGDTHLGGEDFDNRLVSHFVE<br>EFK     | 222  | 26 | 5  | 41.75  | b5b9b10b11b15                                                                   | 2891.32 | 44.117  | 3750   | 4 | 723.59  | -12.58 |
| P34931 HS71L_HUMAN Heat shock 70<br>kDa protein 1L | 19 | Phosphoryl STY()                               | AFYEEISSMVLTK                      | 114  | 14 | 5  | 42.76  | b4b7b8b13_H3PO4<br>b13y12                                                       | 1694.78 | 57.347  | 573200 | 3 | 565.60  | 8.36   |
| P34931 HS71L_HUMAN Heat shock 70<br>kDa protein 1L | 20 |                                                | TTPSYVAF                           | 38   | 8  | 0  | 3.17   |                                                                                 | 885.43  | 55.628  | 5491   | 1 | 885.43  | -7.72  |
| P34931 HS71L_HUMAN Heat shock 70<br>kDa protein 1L | 21 | Carbamidomethyl+C(1)                           | CNELLSWLEVNQLAE                    | 575  | 15 | 3  | 12.56  | y5y7°y7                                                                         | 1817.90 | 136.329 | 2153   | 2 | 909.45  | 14.24  |
| P35579 MYH9_HUMAN Myosin-9                         | 1  |                                                | LQQLDDLLVLDLHQR                    | 1417 | 16 | 25 | 186.42 | b2°b2b3°b3b4°b4b5°b5<br>b12y3*y3y4y5y6y7*y7y<br>8y10y11y12y13y14*y14<br>*y14y16 | 1949.98 | 86.336  | 288056 | 3 | 650.66  | -7.01  |
| P35579 MYH9_HUMAN Myosin-9                         | 2  |                                                | IAQLEEQLDNETK                      | 1815 | 13 | 14 | 130.93 | b3b4°b4b5b9b11y5y6y9<br>y10y11y12°y12y13                                        | 1530.76 | 52.175  | 236915 | 2 | 765.89  | -0.56  |
| P35579 MYH9_HUMAN Myosin-9                         | 3  |                                                | IIGLDQVAGMSETALPGAFK               | 617  | 20 | 11 | 73.24  | b2b3b15y2y4y5y6y7y8y<br>13y20                                                   | 2018.08 | 90.540  | 223584 | 2 | 1009.54 | 7.62   |

|                            |    |                      |                        |      |    |    |        |                                                                           |         |        |        |   |         |        |
|----------------------------|----|----------------------|------------------------|------|----|----|--------|---------------------------------------------------------------------------|---------|--------|--------|---|---------|--------|
| P35579 MYH9_HUMAN Myosin-9 | 4  |                      | VISGVLQLGNIVFKK        | 341  | 15 | 11 | 83.06  | b2b4°b4b5y2y3y4y7y8y9y13                                                  | 1614.98 | 86.310 | 216679 | 3 | 539.00  | -10.66 |
| P35579 MYH9_HUMAN Myosin-9 | 5  |                      | IAEFTTNLTTEEEK         | 1000 | 14 | 12 | 110.74 | b9y4y6y7y8y10y11y12°y12y13y14*y14                                         | 1653.79 | 57.817 | 210250 | 2 | 827.40  | 1.62   |
| P35579 MYH9_HUMAN Myosin-9 | 6  |                      | DELADEIANSSGK          | 1703 | 13 | 17 | 118.42 | b2°b2b3b4b12y1y2y3y4y5*y5y9y10y11y12°y12y13                               | 1348.62 | 50.256 | 197039 | 2 | 674.82  | 0.72   |
| P35579 MYH9_HUMAN Myosin-9 | 7  |                      | QLLQANPILEAFGNAK       | 209  | 16 | 27 | 168.34 | b2*b2b3*b3b4*b4b6*b6b15y2y4*y4y5y6y7°y7*y7y8*y8y10y11y12y13*y13y14y16*y16 | 1726.95 | 91.836 | 186854 | 2 | 863.98  | 2.40   |
| P35579 MYH9_HUMAN Myosin-9 | 8  |                      | IMGIPEEQMGLLR          | 327  | 14 | 8  | 39.38  | b2b3b4b9y10°y10y12y14                                                     | 1615.83 | 78.473 | 170608 | 2 | 808.42  | 5.36   |
| P35579 MYH9_HUMAN Myosin-9 | 9  |                      | DFSALESQLQDTQELLQEENR  | 1301 | 21 | 16 | 85.19  | b2b4°b4b14b16y3°y3y4°y4y5*y5y6y8y11y12y21                                 | 2493.17 | 92.286 | 154573 | 3 | 831.73  | 0.00   |
| P35579 MYH9_HUMAN Myosin-9 | 10 |                      | IAQLEEELEEEQGNTTELINDR | 1730 | 21 | 20 | 124.68 | b3b6°b6b7°b7b15b21y2y3°y3*y3y4y5y6y7y8y10y11y15y21                        | 2472.18 | 71.224 | 144257 | 3 | 824.73  | 4.15   |
| P35579 MYH9_HUMAN Myosin-9 | 11 |                      | ALEQQVEEMK             | 1528 | 10 | 21 | 71.01  | b1b2b3b8°b8*b8b10°b10°b10y1y4°y4y6°y6*y6y7°y7*y7y8*y8y10                  | 1204.59 | 46.454 | 142913 | 2 | 602.80  | 1.42   |
| P35579 MYH9_HUMAN Myosin-9 | 12 |                      | LQVELDNVTGLLSQSDSK     | 1277 | 18 | 14 | 83.46  | b2*b2b4b17y4°y4y6°y6y7y13y14y15y16y18                                     | 1946.02 | 81.605 | 135175 | 2 | 973.51  | 6.77   |
| P35579 MYH9_HUMAN Myosin-9 | 13 |                      | LEMDLKDLEAHIDSANK      | 1614 | 17 | 9  | 34.33  | b10b13°b13y8y10*y10y11y17*y17                                             | 1941.98 | 98.818 | 134740 | 3 | 648.00  | 12.13  |
| P35579 MYH9_HUMAN Myosin-9 | 14 |                      | LDPHLVLDQLR            | 682  | 11 | 8  | 87.71  | b4y3y4y5y6y7y9y11                                                         | 1318.74 | 71.643 | 133784 | 2 | 659.88  | -2.87  |
| P35579 MYH9_HUMAN Myosin-9 | 15 |                      | ANLQIDQINTDLNLER       | 1754 | 16 | 17 | 112.7  | b2b3*b3b4*b4b7b13b14y4*y4y6y8y10y11y12*y12y16                             | 1869.98 | 72.684 | 127347 | 2 | 935.49  | 6.14   |
| P35579 MYH9_HUMAN Myosin-9 | 16 |                      | LTEMETLQSQLMAEK        | 867  | 15 | 8  | 48.82  | b3b4b7y3y11y12°y12y15                                                     | 1751.87 | 73.862 | 111689 | 2 | 876.44  | 5.50   |
| P35579 MYH9_HUMAN Myosin-9 | 17 |                      | ASITALEAK              | 1806 | 9  | 5  | 38.48  | y2y4y5y6y9                                                                | 903.51  | 42.765 | 108796 | 2 | 452.26  | -7.97  |
| P35579 MYH9_HUMAN Myosin-9 | 18 | Carbamidomethyl-C(9) | VEDMAELTCLNEASVLHNLK   | 82   | 20 | 9  | 56.3   | b2b3y4y5y11y13y15y18y20                                                   | 2286.11 | 80.299 | 104660 | 3 | 762.71  | -2.14  |
| P35579 MYH9_HUMAN Myosin-9 | 19 |                      | VSHLLGINVTDPTR         | 373  | 14 | 8  | 73.34  | b5y3y4y5y7y9y10y14                                                        | 1571.84 | 75.484 | 104200 | 3 | 524.62  | -10.33 |
| P35579 MYH9_HUMAN Myosin-9 | 20 |                      | EEILAQAK               | 1661 | 8  | 7  | 49.63  | b6y1y2y4y5y6y8                                                            | 901.49  | 35.452 | 101877 | 2 | 451.25  | -5.42  |
| P35579 MYH9_HUMAN Myosin-9 | 21 | Carbamidomethyl-C(4) | ADFCIIHYAGK            | 565  | 11 | 11 | 101.81 | b1b3b7y1y2y3y4y5y7y8y9                                                    | 1294.62 | 59.379 | 101440 | 2 | 647.81  | -3.11  |
| P35579 MYH9_HUMAN Myosin-9 | 22 |                      | TQLEEELEDELQATEDAK     | 1538 | 17 | 12 | 91.72  | b11b14b15y2y4y5y6y13*y13y14y15y17                                         | 1961.93 | 79.482 | 100497 | 2 | 981.47  | 7.16   |
| P35579 MYH9_HUMAN Myosin-9 | 23 |                      | ALELDSNLYR             | 745  | 10 | 10 | 54.69  | b2b8b9y1y2y5y6y8*y8y10                                                    | 1193.61 | 60.459 | 97519  | 2 | 597.31  | -2.45  |
| P35579 MYH9_HUMAN Myosin-9 | 24 |                      | VVFQEFR                | 711  | 7  | 10 | 64.29  | b1b2b6y1y2y3y4y5y6y7                                                      | 924.49  | 56.445 | 94775  | 2 | 462.75  | -7.86  |
| P35579 MYH9_HUMAN Myosin-9 | 25 |                      | LEVNLQAMK              | 1557 | 9  | 8  | 68.1   | b2y3y4*y4y6y7y8y9                                                         | 1045.57 | 58.589 | 94539  | 2 | 523.29  | -4.67  |
| P35579 MYH9_HUMAN Myosin-9 | 26 |                      | MQQNIQELEELEEEESAR     | 940  | 19 | 16 | 123.98 | b2b5b7b8b9b11b12y3y4°y4y7y9y13y14y17y19                                   | 2333.08 | 75.602 | 91042  | 2 | 1167.04 | 10.05  |

|                            |    |                                             |                                   |      |    |    |        |                                                               |         |         |        |   |         |        |
|----------------------------|----|---------------------------------------------|-----------------------------------|------|----|----|--------|---------------------------------------------------------------|---------|---------|--------|---|---------|--------|
| P35579 MYH9_HUMAN Myosin-9 | 27 | Carbamidomethyl+C(13)                       | LEEEQIILEDQNCK                    | 975  | 14 | 16 | 154.92 | b2b3b5b6b7b12b13y3y4y5y7y8y9y10*y10y14                        | 1760.84 | 55.630  | 82021  | 2 | 880.92  | 2.15   |
| P35579 MYH9_HUMAN Myosin-9 | 28 |                                             | TEMEDLMSSKDDVVGK                  | 1503 | 15 | 8  | 72.31  | b10y3y8y10y11y12y13y15                                        | 1684.73 | 51.854  | 81126  | 3 | 562.25  | -8.19  |
| P35579 MYH9_HUMAN Myosin-9 | 29 |                                             | ELESQISELQEDLESER                 | 1107 | 17 | 21 | 162.21 | b5*b5b8*b8b15*b15b16y3y5y6y8y9y10*y10*y10y11y12y14*y14y15y17  | 2033.97 | 80.073  | 78448  | 2 | 1017.49 | 11.10  |
| P35579 MYH9_HUMAN Myosin-9 | 30 |                                             | QLEEAEEEAQR                       | 1877 | 11 | 24 | 157.24 | b3*b3*b3b4*b4b8*b8b10b11y2*y2y3y4y5*y5y6*y6y7y8*y8y9*y9y10y11 | 1331.61 | 30.139  | 77729  | 2 | 666.31  | 0.55   |
| P35579 MYH9_HUMAN Myosin-9 | 31 |                                             | ELEDATETADAMNR                    | 1898 | 14 | 9  | 55.31  | y2y3*y3y8y9y10*y10y12y14                                      | 1565.68 | 43.912  | 73359  | 2 | 783.34  | 4.91   |
| P35579 MYH9_HUMAN Myosin-9 | 32 |                                             | NFINNPLAQADWAAK                   | 14   | 15 | 7  | 48.82  | b3b9b14y6y8y10y15                                             | 1672.86 | 78.787  | 69810  | 2 | 836.93  | 6.93   |
| P35579 MYH9_HUMAN Myosin-9 | 33 |                                             | KEEELQAALAR                       | 1080 | 11 | 10 | 117.33 | b3b4b8b10y4y5y7y9y10y11                                       | 1257.68 | 43.213  | 55663  | 2 | 629.34  | -1.75  |
| P35579 MYH9_HUMAN Myosin-9 | 34 |                                             | VEAQLQELQVK                       | 1249 | 11 | 13 | 114.32 | b1b2b3b4b5*b5b9y3y5y7y8y9y11                                  | 1284.71 | 53.875  | 50753  | 2 | 642.86  | -6.65  |
| P35579 MYH9_HUMAN Myosin-9 | 35 | Carbamidomethyl+C(7)                        | MEDSVGCLETAEVVK                   | 1372 | 15 | 4  | 26.39  | y8y10*y10y13                                                  | 1696.76 | 54.393  | 44144  | 2 | 848.88  | 12.30  |
| P35579 MYH9_HUMAN Myosin-9 | 36 |                                             | EQEVNILK                          | 1165 | 8  | 4  | 41.1   | y4y5y6y8                                                      | 972.53  | 46.038  | 42502  | 2 | 486.77  | -5.46  |
| P35579 MYH9_HUMAN Myosin-9 | 37 |                                             | SMEAEMIQLQEELAAAER                | 1676 | 18 | 15 | 108.52 | b2b3b13b16y3y4y5*y5y7y8y9*y9*y9y10y13                         | 2048.96 | 94.758  | 39681  | 3 | 683.66  | -3.69  |
| P35579 MYH9_HUMAN Myosin-9 | 38 |                                             | DLEAHIDSANK                       | 1620 | 11 | 4  | 27.52  | b7b8y9y11                                                     | 1212.58 | 35.346  | 37928  | 2 | 606.80  | -0.91  |
| P35579 MYH9_HUMAN Myosin-9 | 39 |                                             | NLPYSEEIVEMYK                     | 125  | 14 | 7  | 44.82  | b3b4b7y1y11y12y14                                             | 1727.87 | 82.557  | 37906  | 2 | 864.44  | 8.83   |
| P35579 MYH9_HUMAN Myosin-9 | 40 | Carbamidomethyl+C(1)                        | CNGVLEGIR                         | 693  | 9  | 10 | 76.63  | b2*b2b4b8y1y3y4y5y7y9                                         | 1017.51 | 49.428  | 37205  | 2 | 509.26  | -4.26  |
| P35579 MYH9_HUMAN Myosin-9 | 41 |                                             | ADEWLMK                           | 580  | 7  | 4  | 40.7   | y3y4y5y7                                                      | 892.42  | 56.401  | 33147  | 2 | 446.72  | 1.09   |
| P35579 MYH9_HUMAN Myosin-9 | 42 |                                             | TELEDTLDDSTAQQELR                 | 1145 | 17 | 5  | 30.15  | b3b13y12y13y17                                                | 1919.93 | 61.970  | 30830  | 2 | 960.47  | 6.17   |
| P35579 MYH9_HUMAN Myosin-9 | 43 |                                             | LEGDSTDLSDQIAELQAIAELK            | 1052 | 23 | 12 | 63.48  | b9b15*b15b19y1y2y3*y3y4y5y7y8                                 | 2487.26 | 102.258 | 30204  | 2 | 1244.14 | 6.87   |
| P35579 MYH9_HUMAN Myosin-9 | 44 |                                             | QIATLHAQVADMK                     | 1357 | 13 | 5  | 32.58  | b3y5*y5y6y10                                                  | 1425.75 | 85.178  | 28075  | 2 | 713.38  | -0.68  |
| P35579 MYH9_HUMAN Myosin-9 | 45 |                                             | THEAQIQEMR                        | 1181 | 10 | 13 | 89.08  | b2*b2b3*b3b4y2y3y4*y4y5y7y8y10                                | 1242.59 | 29.576  | 26198  | 2 | 621.80  | -2.85  |
| P35579 MYH9_HUMAN Myosin-9 | 46 |                                             | QTLENER                           | 1219 | 7  | 5  | 57.01  | b3*b3b4y4y6                                                   | 889.43  | 28.798  | 9939   | 2 | 445.22  | -5.28  |
| P35579 MYH9_HUMAN Myosin-9 | 47 |                                             | IAQLEEQDNETKER                    | 1815 | 15 | 6  | 38.15  | b9*b9y6y7y8y15                                                | 1815.91 | 50.865  | 9519   | 2 | 908.46  | -0.54  |
| P35579 MYH9_HUMAN Myosin-9 | 48 |                                             | HSQAVEELAEQLEQTK                  | 1193 | 16 | 5  | 23.86  | b4*b4b5y14*y14                                                | 1839.90 | 81.559  | 6304   | 2 | 920.45  | -3.38  |
| P35579 MYH9_HUMAN Myosin-9 | 49 |                                             | INFVDVNGYIVGANIETYLLEK            | 240  | 21 | 4  | 14     | b6b12*b12y11                                                  | 2385.23 | 113.061 | 5260   | 3 | 795.75  | -0.31  |
| P35579 MYH9_HUMAN Myosin-9 | 50 | Carbamidomethyl+C(26)                       | QGASFIGILDIAGFEIFDLNSFEQLCINYTNEK | 442  | 33 | 5  | 22.23  | b6*b6b7y1y13                                                  | 3766.86 | 129.694 | 2472   | 3 | 1256.29 | 8.10   |
| P35579 MYH9_HUMAN Myosin-9 | 51 |                                             | EEVGEEAIVELVENGKK                 | 47   | 17 | 5  | 16.47  | b4b13*b13y5*y5                                                | 1871.95 | 97.688  | 2312   | 3 | 624.65  | -5.93  |
| P35579 MYH9_HUMAN Myosin-9 | 52 | Carbamidomethyl+C(7)                        | QELEEICHDLEAR                     | 910  | 13 | 4  | 32.58  | b8b10b11y10                                                   | 1641.78 | 54.882  | 2288   | 2 | 821.39  | 13.23  |
| P35579 MYH9_HUMAN Myosin-9 | 53 |                                             | VIQYLAYVASSHK                     | 186  | 13 | 3  | 28.31  | y5y6y8                                                        | 1478.78 | 62.246  | 143204 | 3 | 493.60  | -14.86 |
| P35579 MYH9_HUMAN Myosin-9 | 54 |                                             | LQEMEGTVK                         | 1793 | 9  | 4  | 38.48  | y3y6y7*y7                                                     | 1034.52 | 33.058  | 83589  | 2 | 517.76  | 0.59   |
| P35579 MYH9_HUMAN Myosin-9 | 55 | Carbamidomethyl+C(11);Carbamidomethyl+C(12) | ITDVIIGFQACCR                     | 778  | 13 | 3  | 20.83  | b5b9y9                                                        | 1552.78 | 52.467  | 81786  | 3 | 518.27  | 12.97  |
| P35579 MYH9_HUMAN Myosin-9 | 56 |                                             | LMATLR                            | 656  | 6  | 2  | 27     | y4y5                                                          | 704.41  | 40.756  | 15851  | 2 | 352.71  | -8.32  |
| P35579 MYH9_HUMAN Myosin-9 | 57 |                                             | EEVGEEAIVELVENGK                  | 47   | 16 | 3  | 17.33  | b10b12y7                                                      | 1743.86 | 76.754  | 14285  | 2 | 872.43  | -2.94  |
| P35579 MYH9_HUMAN Myosin-9 | 58 |                                             | NAEQYK                            | 1856 | 6  | 1  | 13.7   | y4                                                            | 752.35  | 68.461  | 12481  | 1 | 752.35  | -6.90  |
| P35579 MYH9_HUMAN Myosin-9 | 59 |                                             | FQKPK                             | 555  | 5  | 3  | 26.6   | b3b4*b4                                                       | 647.39  | 28.194  | 12179  | 1 | 647.39  | 10.37  |
| P35579 MYH9_HUMAN Myosin-9 | 60 |                                             | DEAIK                             | 1633 | 5  | 1  | 13.3   | b4                                                            | 575.31  | 62.477  | 11428  | 1 | 575.31  | 7.43   |
| P35579 MYH9_HUMAN Myosin-9 | 61 |                                             | ALSLAR                            | 1477 | 6  | 3  | 40.3   | b3y4y5                                                        | 630.40  | 35.405  | 10339  | 1 | 630.40  | 5.23   |

|                            |    |                       |                                  |      |    |    |        |                                                                                   |         |         |        |   |         |        |
|----------------------------|----|-----------------------|----------------------------------|------|----|----|--------|-----------------------------------------------------------------------------------|---------|---------|--------|---|---------|--------|
| P35579 MYH9_HUMAN Myosin-9 | 62 |                       | ATDK                             | 536  | 4  | 2  | 12.91  | b3°b3                                                                             | 434.23  | 61.494  | 9091   | 1 | 434.23  | 10.26  |
| P35579 MYH9_HUMAN Myosin-9 | 63 |                       | QLER                             | 1780 | 5  | 1  | 13.3   | b4                                                                                | 673.36  | 35.276  | 8541   | 1 | 673.36  | 1.09   |
| P35579 MYH9_HUMAN Myosin-9 | 64 |                       | AEAEAR                           | 1466 | 6  | 1  | 13.7   | y5                                                                                | 646.31  | 54.575  | 8534   | 1 | 646.31  | -4.82  |
| P35579 MYH9_HUMAN Myosin-9 | 65 |                       | ALEEAMEQK                        | 1483 | 9  | 7  | 65.09  | b3°b3y4°y4y5y7y8                                                                  | 1048.52 | 90.128  | 8076   | 2 | 524.76  | 17.11  |
| P35579 MYH9_HUMAN Myosin-9 | 66 |                       | VTTEAK                           | 966  | 6  | 1  | 13.7   | b4                                                                                | 648.36  | 32.673  | 7818   | 2 | 324.69  | 11.58  |
| P35579 MYH9_HUMAN Myosin-9 | 67 |                       | DMFQETMEAMR                      | 316  | 11 | 8  | 55.88  | b3°b3b4°b4*b4y4y7y10                                                              | 1388.56 | 17.988  | 7047   | 3 | 463.53  | -1.76  |
| P35579 MYH9_HUMAN Myosin-9 | 68 |                       | ADGAEAKPAE                       | 1950 | 10 | 3  | 27.12  | b8y3y8                                                                            | 958.45  | 36.754  | 6927   | 2 | 479.73  | -2.23  |
| P35579 MYH9_HUMAN Myosin-9 | 69 |                       | LEMDLK                           | 1614 | 6  | 3  | 27     | b5y3°y3                                                                           | 748.39  | 60.911  | 5434   | 1 | 748.39  | -6.44  |
| P35579 MYH9_HUMAN Myosin-9 | 70 |                       | NMDPLNDNIATLLHQSSDK              | 587  | 19 | 6  | 38.52  | b6b10b12y5y8y16                                                                   | 2125.98 | 108.773 | 4954   | 3 | 709.33  | -18.49 |
| P35579 MYH9_HUMAN Myosin-9 | 71 |                       | VAAYDK                           | 1404 | 6  | 1  | 13.7   | y3                                                                                | 666.35  | 51.260  | 4568   | 2 | 333.68  | 13.46  |
| P35579 MYH9_HUMAN Myosin-9 | 72 |                       | QVEDEK                           | 1332 | 6  | 1  | 13.7   | b5                                                                                | 747.36  | 101.338 | 2347   | 1 | 747.36  | 12.25  |
| P35579 MYH9_HUMAN Myosin-9 | 73 | Carbamidomethyl+C(14) | LQLQEQLQAETELCAEAEELR            | 882  | 21 | 4  | 21.91  | b15y10y14y16                                                                      | 2501.26 | 136.856 | 1876   | 2 | 1251.14 | 18.25  |
| P35579 MYH9_HUMAN Myosin-9 | 74 |                       | HNLEK                            | 1352 | 5  | 1  | 13.3   | b3                                                                                | 640.34  | 27.027  | 1838   | 1 | 640.34  | 5.62   |
| P35579 MYH9_HUMAN Myosin-9 | 75 |                       | EQLLEEEEAQK                      | 1342 | 10 | 4  | 40.42  | b6y4y5y7                                                                          | 1233.54 | 23.957  | 1512   | 2 | 617.27  | -5.15  |
| P35579 MYH9_HUMAN Myosin-9 | 76 |                       | DLGEELEALKTELEDTLDSTAAQQLR       | 1135 | 27 | 28 | 193.24 | b3b4b7b8°b8b10°b10b12°b12b13b14b15b24b25b26y5°y5*y5y7y8*y8y9y10°y10*y10y11*y11y12 | 3017.48 | 118.890 | 205830 | 3 | 1006.50 | -1.21  |
| P35579 MYH9_HUMAN Myosin-9 | 77 |                       | HSQAVEELAEQLEQTKR                | 1193 | 17 | 3  | 16.47  | b16y9y12                                                                          | 1996.01 | 61.771  | 189304 | 3 | 666.01  | -1.28  |
| P35579 MYH9_HUMAN Myosin-9 | 78 |                       | LMATLRNTNPNFVR                   | 656  | 14 | 4  | 19.46  | b4°b4b12y7                                                                        | 1646.86 | 48.617  | 172484 | 3 | 549.62  | -12.53 |
| P35579 MYH9_HUMAN Myosin-9 | 79 | Carbamidomethyl+C(27) | RQGASFIGLDIAGFEIFDLNSFEQLCINYNEK | 441  | 34 | 3  | 11.02  | b4y3y16                                                                           | 3922.89 | 96.524  | 122023 | 4 | 981.48  | -9.83  |
| P35579 MYH9_HUMAN Myosin-9 | 80 |                       | EQLLEEEEAQKHLEK                  | 1342 | 15 | 9  | 89.59  | b3y3y4y5°y5y7y9y12y13                                                             | 1854.87 | 35.788  | 107126 | 3 | 618.96  | -2.37  |
| P35579 MYH9_HUMAN Myosin-9 | 81 |                       | KLEGDSTDLSDQIAELQAQIAELK         | 1051 | 24 | 24 | 185.85 | b3b7°b7b8°b8b9°b9b10b12°b12b13°b13b14b15b16b21y3°y3y4y5y7y8y9y11                  | 2615.34 | 97.679  | 90387  | 3 | 872.45  | -2.15  |
| P35579 MYH9_HUMAN Myosin-9 | 82 |                       | EEVGEEAIVELVENGKK                | 47   | 17 | 4  | 42.41  | y4y5y8y9                                                                          | 1871.94 | 76.118  | 82812  | 3 | 624.65  | -10.50 |
| P35579 MYH9_HUMAN Myosin-9 | 83 |                       | ELESQISELQEDLESERASR             | 1107 | 20 | 3  | 21.3   | y7y11y16                                                                          | 2348.15 | 82.284  | 65540  | 3 | 783.39  | 11.54  |
| P35579 MYH9_HUMAN Myosin-9 | 84 |                       | NMDPLNDNIATLLHQSSDKFVSELWK       | 587  | 26 | 6  | 26.77  | b3b8b10b12y13°y13                                                                 | 3015.48 | 105.542 | 64400  | 4 | 754.63  | -2.43  |
| P35579 MYH9_HUMAN Myosin-9 | 85 |                       | RGDLPFVVPR                       | 1922 | 10 | 5  | 57.7   | b3b4y4y5y6                                                                        | 1155.66 | 61.261  | 54863  | 2 | 578.33  | -1.48  |
| P35579 MYH9_HUMAN Myosin-9 | 86 |                       | ALEQQVEEMKTQLEEELEDELQAT EDAK    | 1528 | 27 | 10 | 64.47  | b4°b4*b4b5b6b11y3y4y5y12                                                          | 3147.51 | 105.354 | 52512  | 3 | 1049.84 | 6.59   |
| P35579 MYH9_HUMAN Myosin-9 | 87 |                       | AQQAADKYL YVDK                   | 1    | 13 | 5  | 28.31  | b8°b8*b8b9b12                                                                     | 1512.78 | 37.894  | 52089  | 3 | 504.93  | 3.87   |
| P35579 MYH9_HUMAN Myosin-9 | 88 | Carbamidomethyl+C(14) | KLEEEQIILEDQNK                   | 974  | 15 | 6  | 24.33  | b6°b6*b6y8y9°y9                                                                   | 1888.95 | 81.794  | 48975  | 2 | 944.98  | 6.98   |
| P35579 MYH9_HUMAN Myosin-9 | 89 | Carbamidomethyl+C(7)  | MEDSVGCLETAEEVKR                 | 1372 | 16 | 3  | 25.7   | y8y9y11                                                                           | 1852.84 | 49.242  | 48251  | 3 | 618.28  | -3.36  |
| P35579 MYH9_HUMAN Myosin-9 | 90 |                       | RHEMPPHIYAITDTAYR                | 142  | 17 | 10 | 72.31  | b7°b7b8b9y5°y5y6y8y9°y9                                                           | 2071.04 | 108.792 | 37693  | 3 | 691.02  | 10.14  |
| P35579 MYH9_HUMAN Myosin-9 | 91 |                       | AGKLDPHLVLDQLR                   | 679  | 14 | 4  | 27.84  | b3b5y3y7                                                                          | 1574.88 | 66.828  | 29968  | 3 | 525.63  | -11.08 |
| P35579 MYH9_HUMAN Myosin-9 | 92 |                       | DLEAHIDSANKNR                    | 1620 | 13 | 8  | 70.27  | b4b7b9y4y7y8*y8y9                                                                 | 1482.72 | 32.088  | 24057  | 3 | 494.91  | -6.67  |
| P35579 MYH9_HUMAN Myosin-9 | 93 | Carbamidomethyl+C(6)  | DKADFCIIHYAGK                    | 563  | 13 | 3  | 20.83  | b8y3y5                                                                            | 1537.73 | 55.352  | 23562  | 3 | 513.25  | -10.88 |
| P35579 MYH9_HUMAN Myosin-9 | 94 |                       | QLEEAEEEAQRANASR                 | 1877 | 16 | 3  | 17.33  | b3b15y14                                                                          | 1830.88 | 105.617 | 23491  | 2 | 915.94  | 9.60   |
| P35579 MYH9_HUMAN Myosin-9 | 95 |                       | MQQNIQELEELEEEESARQK             | 940  | 21 | 10 | 37.41  | b3b6y7°y7*y7y9°y9y11*y11y15                                                       | 2589.18 | 121.772 | 19876  | 4 | 648.05  | -11.41 |
| P35579 MYH9_HUMAN Myosin-9 | 96 |                       | QLAAENRLTEMETLQSQLMAEK           | 860  | 22 | 5  | 21.07  | b10y8y10y14°y14                                                                   | 2534.26 | 108.829 | 19392  | 3 | 845.42  | 0.48   |
| P35579 MYH9_HUMAN Myosin-9 | 97 |                       | YLYVDKNFINNPLAQADWAAK            | 8    | 21 | 5  | 19.13  | b3b14y8°y8y13                                                                     | 2454.21 | 106.316 | 18767  | 3 | 818.74  | -14.62 |
| P35579 MYH9_HUMAN Myosin-9 | 98 |                       | IAQLEEELEEEQGNTTELINDRLK         | 1730 | 23 | 5  | 43.27  | b7b9b10b11b17                                                                     | 2713.35 | 108.111 | 16229  | 4 | 679.09  | -1.62  |

|                              |     |                      |                       |      |    |    |        |                                   |         |         |        |   |         |        |
|------------------------------|-----|----------------------|-----------------------|------|----|----|--------|-----------------------------------|---------|---------|--------|---|---------|--------|
| P35579 MYH9_HUMAN Myosin-9   | 99  |                      | IAQLEEQLDNETKER       | 1815 | 15 | 4  | 38.15  | b9y9y10y11                        | 1815.88 | 87.588  | 15585  | 2 | 908.45  | -13.44 |
| P35579 MYH9_HUMAN Myosin-9   | 100 |                      | VKLQEMEGTVK           | 1791 | 11 | 5  | 31.5   | y4y5°y5y7°y7                      | 1261.67 | 42.041  | 15215  | 3 | 421.23  | -13.45 |
| P35579 MYH9_HUMAN Myosin-9   | 101 |                      | YEILTPNSIPKGFMDGK     | 720  | 17 | 3  | 23.88  | y3y6y8                            | 1909.97 | 97.948  | 12429  | 2 | 955.49  | -0.38  |
| P35579 MYH9_HUMAN Myosin-9   | 102 |                      | DELADEIANSSGKGALALEEK | 1703 | 21 | 3  | 23.66  | b4b14b15                          | 2160.06 | 67.709  | 12331  | 3 | 720.69  | -4.52  |
| P35579 MYH9_HUMAN Myosin-9   | 103 |                      | KANLQIDQINTDLNLER     | 1753 | 17 | 4  | 23.88  | y4y6y8*y8                         | 1998.06 | 66.221  | 11874  | 2 | 999.54  | 0.67   |
| P35579 MYH9_HUMAN Myosin-9   | 104 |                      | DLEGLSQRHEEK          | 1392 | 12 | 7  | 44.52  | b7*b7b10b11y3y10*y10              | 1440.70 | 99.354  | 10922  | 2 | 720.86  | -2.97  |
| P35579 MYH9_HUMAN Myosin-9   | 105 |                      | QVEDEKNSFR            | 1332 | 10 | 3  | 28.88  | b7b8y3                            | 1251.60 | 58.488  | 10206  | 2 | 626.30  | 3.90   |
| P35579 MYH9_HUMAN Myosin-9   | 106 | Carbamidomethyl+C(8) | KQELEEICHDLEAR        | 909  | 14 | 4  | 27.25  | y7y10°y10y11                      | 1769.85 | 49.591  | 9424   | 4 | 443.22  | -0.07  |
| P35579 MYH9_HUMAN Myosin-9   | 107 |                      | KMQQNIQELEEQLLEESAR   | 939  | 20 | 3  | 14.51  | b3b11y8                           | 2461.18 | 72.834  | 9300   | 2 | 1231.09 | 12.30  |
| P35579 MYH9_HUMAN Myosin-9   | 108 |                      | FVSELWKDVDR           | 606  | 11 | 4  | 27.52  | b4b5°b5y4                         | 1393.71 | 90.276  | 7861   | 2 | 697.36  | -3.59  |
| P35579 MYH9_HUMAN Myosin-9   | 109 |                      | TLEEEAKTHEAQIQEMR     | 1174 | 17 | 5  | 23.16  | b10b13y6*y6y8                     | 2042.99 | 79.394  | 6932   | 3 | 681.67  | 4.06   |
| P35579 MYH9_HUMAN Myosin-9   | 110 |                      | KGAGDGSDEEVDGK        | 1936 | 14 | 3  | 19.46  | b10y7y12                          | 1363.59 | 49.232  | 6184   | 3 | 455.20  | -6.89  |
| P35579 MYH9_HUMAN Myosin-9   | 111 |                      | HNLEKQIATLHAQVADMK    | 1352 | 18 | 4  | 15.73  | b4y3y6*y6                         | 2047.07 | 90.385  | 5765   | 3 | 683.03  | -3.40  |
| P35579 MYH9_HUMAN Myosin-9   | 112 |                      | HEAMITDLEERLR         | 1024 | 13 | 3  | 20.83  | b6b10y12                          | 1612.83 | 68.364  | 5546   | 3 | 538.28  | 14.61  |
| P35579 MYH9_HUMAN Myosin-9   | 113 |                      | AGVLAHLEERDLK         | 764  | 14 | 4  | 27.84  | b11b13y9y11                       | 1579.86 | 62.328  | 5484   | 4 | 395.72  | 7.03   |
| P35579 MYH9_HUMAN Myosin-9   | 114 |                      | MAQQAADKYLVDK         | 0    | 14 | 3  | 19.46  | b5b13y10                          | 1643.81 | 59.803  | 5154   | 2 | 822.41  | -2.60  |
| P35579 MYH9_HUMAN Myosin-9   | 115 |                      | LLEDRIAFTTNLTETEEK    | 995  | 19 | 4  | 23.88  | b14y4y6y8                         | 2280.12 | 47.539  | 4792   | 3 | 760.71  | 0.11   |
| P35579 MYH9_HUMAN Myosin-9   | 116 | Carbamidomethyl+C(4) | ADFCIIHYAGKVYDK       | 565  | 15 | 3  | 18.31  | b13y3y13                          | 1799.89 | 108.775 | 4109   | 2 | 900.45  | 5.83   |
| P35579 MYH9_HUMAN Myosin-9   | 117 |                      | NLPIYSEEIVEMYK GK     | 125  | 16 | 6  | 35.77  | b8b11b12*b12y7y13                 | 1912.96 | 97.580  | 3937   | 2 | 956.98  | -7.34  |
| P35579 MYH9_HUMAN Myosin-9   | 118 | Carbamidomethyl+C(8) | VEEEEERCQHLQAEK       | 923  | 15 | 3  | 18.31  | b3y4y13                           | 1913.85 | 90.341  | 3909   | 3 | 638.62  | -8.93  |
| P35579 MYH9_HUMAN Myosin-9   | 119 |                      | QTLENERGELANEVK       | 1219 | 15 | 4  | 18.31  | b13y5y11°y11                      | 1729.85 | 106.494 | 2752   | 2 | 865.43  | -13.76 |
| P35579 MYH9_HUMAN Myosin-9   | 120 |                      | SHAQKNENAR            | 1770 | 10 | 5  | 27.12  | b4*b4y3y7°y7                      | 1154.58 | 24.025  | 2502   | 3 | 385.53  | 11.52  |
| P35579 MYH9_HUMAN Myosin-9   | 121 |                      | VMQEQGTHPKFKPK        | 545  | 15 | 5  | 52.7   | b6b7b10b12b13                     | 1782.91 | 86.055  | 1964   | 3 | 594.98  | -11.91 |
| P35579 MYH9_HUMAN Myosin-9   | 122 |                      | VEAQLQELQVKFNENGER    | 1249 | 17 | 3  | 16.47  | b4y9y11                           | 2017.01 | 112.660 | 1665   | 3 | 673.01  | -10.59 |
| P35579 MYH9_HUMAN Myosin-9   | 123 |                      | LEMDLKDLEAHIDSANK     | 1614 | 17 | 4  | 16.47  | b14°b14y11y16                     | 1941.97 | 136.740 | 1636   | 1 | 1941.97 | 7.79   |
| P35579 MYH9_HUMAN Myosin-9   | 124 |                      | NKHEAMITDLEER         | 1022 | 13 | 10 | 68.51  | b3b8°b8*b8b11°b11y3y6y7y10        | 1585.75 | 111.411 | 1554   | 2 | 793.38  | -11.55 |
| P35579 MYH9_HUMAN Myosin-9   | 125 | Phosphoryl STY(8)    | INFDVNGYIVGANIETYLLEK | 240  | 21 | 3  | 14     | b6y3y15                           | 2465.20 | 93.053  | 212080 | 3 | 822.41  | 5.84   |
| P35579 MYH9_HUMAN Myosin-9   | 126 | Phosphoryl STY(6)    | ALELDSNLYR            | 745  | 10 | 4  | 28.88  | b5b6y9*y9                         | 1273.57 | 32.096  | 95302  | 3 | 425.20  | -1.15  |
| P35579 MYH9_HUMAN Myosin-9   | 127 | Phosphoryl STY(11)   | HEMPPHIYAITDTAYR      | 143  | 16 | 4  | 27.92  | b4b8b10y5                         | 1994.87 | 45.569  | 59075  | 3 | 665.63  | -0.98  |
| P35579 MYH9_HUMAN Myosin-9   | 128 | Phosphoryl STY()     | NLPIYSEEIVEMYK        | 125  | 14 | 3  | 19.46  | b6b10y8                           | 1807.83 | 49.578  | 2978   | 2 | 904.42  | 12.02  |
| P35579 MYH9_HUMAN Myosin-9   | 129 | Oxidation+M(15)      | LQRELEDATETADAMNR     | 1895 | 17 | 4  | 27.64  | b7b11b12y14                       | 1978.92 | 57.403  | 9153   | 2 | 989.97  | 5.68   |
| P35579 MYH9_HUMAN Myosin-9   | 130 | Oxidation+M(12)      | NLPIYSEEIVEMYK        | 125  | 14 | 5  | 31.01  | b6b7b9°b9y12                      | 1743.86 | 84.563  | 8265   | 2 | 872.44  | 7.91   |
| P35579 MYH9_HUMAN Myosin-9   | 131 |                      | LEEEQIILEDQN          | 975  | 12 | 0  | 3.57   |                                   | 1472.73 | 55.673  | 31322  | 2 | 736.87  | 12.35  |
| P35579 MYH9_HUMAN Myosin-9   | 132 |                      | EAHIDSANK             | 1622 | 9  | 2  | 7.9    | b3°b3                             | 984.46  | 35.354  | 25156  | 2 | 492.74  | -10.17 |
| P35579 MYH9_HUMAN Myosin-9   | 133 |                      | SGVLQLGNIVFKK         | 343  | 13 | 2  | 7.27   | b5*b5                             | 1402.84 | 86.307  | 24824  | 2 | 701.93  | 1.13   |
| P35579 MYH9_HUMAN Myosin-9   | 134 |                      | PHLVLDQLR             | 684  | 9  | 1  | 7.9    | b3                                | 1090.64 | 71.658  | 11621  | 2 | 545.82  | -1.23  |
| P35579 MYH9_HUMAN Myosin-9   | 135 |                      | HIDSANK               | 1624 | 7  | 1  | 7.27   | b6                                | 784.38  | 98.742  | 5425   | 1 | 784.38  | -13.38 |
| P35579 MYH9_HUMAN Myosin-9   | 136 |                      | DPHLVLDQLR            | 683  | 10 | 0  | 2.38   |                                   | 1205.66 | 71.723  | 4606   | 2 | 603.34  | 0.10   |
| P35579 MYH9_HUMAN Myosin-9   | 137 |                      | EEILAQAK              | 1661 | 8  | 0  | 1.19   |                                   | 883.48  | 35.475  | 11726  | 2 | 442.24  | -3.52  |
| P35579 MYH9_HUMAN Myosin-9   | 138 |                      | ASITALEAK             | 1806 | 9  | 0  | 1.59   |                                   | 885.50  | 42.811  | 7314   | 2 | 443.25  | -4.27  |
| P35579 MYH9_HUMAN Myosin-9   | 139 |                      | THEAQIQEMR            | 1181 | 10 | 0  | 1.98   |                                   | 1225.56 | 29.500  | 1552   | 3 | 409.19  | 3.78   |
| P35580 MYH10_HUMAN Myosin-10 | 1   |                      | LDPHLVLDQLR           | 689  | 11 | 8  | 87.71  | b4y3y4y5y6y7y9y11                 | 1318.74 | 71.643  | 133784 | 2 | 659.88  | -2.87  |
| P35580 MYH10_HUMAN Myosin-10 | 2   | Carbamidomethyl+C(9) | VEDMAELTCLNEASVLHNLK  | 86   | 20 | 9  | 56.3   | b2b3y4y5y11y13y15y18y20           | 2286.11 | 80.299  | 104660 | 3 | 762.71  | -2.14  |
| P35580 MYH10_HUMAN Myosin-10 | 3   | Carbamidomethyl+C(4) | ADFCIIHYAGK           | 572  | 11 | 11 | 101.81 | b1b3b7y1y2y3y4y5y7y8y9            | 1294.62 | 59.379  | 101440 | 2 | 647.81  | -3.11  |
| P35580 MYH10_HUMAN Myosin-10 | 4   |                      | TQLEEELEDELQATEDAK    | 1545 | 17 | 12 | 91.72  | b11b14b15y2y4y5y6y13*y13y14y15y17 | 1961.93 | 79.482  | 100497 | 2 | 981.47  | 7.16   |
| P35580 MYH10_HUMAN Myosin-10 | 5   | Carbamidomethyl+C(1) | CNGVLEGIR             | 700  | 9  | 10 | 76.63  | b2*b2b4b8y1y3y4y5y7y9             | 1017.51 | 49.428  | 37205  | 2 | 509.26  | -4.26  |

|                              |    |                       |                          |      |    |    |       |                          |         |         |        |   |         |        |
|------------------------------|----|-----------------------|--------------------------|------|----|----|-------|--------------------------|---------|---------|--------|---|---------|--------|
| P35580 MYH10_HUMAN Myosin-10 | 6  |                       | ADEWLMK                  | 587  | 7  | 4  | 40.7  | y3y4y5y7                 | 892.42  | 56.401  | 33147  | 2 | 446.72  | 1.09   |
| P35580 MYH10_HUMAN Myosin-10 | 7  |                       | IAQLEEEEEEQSNMELLNDR     | 1737 | 21 | 6  | 24.92 | b3b4b10y2y8y21           | 2532.21 | 124.804 | 22112  | 3 | 844.74  | 14.56  |
| P35580 MYH10_HUMAN Myosin-10 | 8  | Carbamidomethyl+C(2)  | LCHLLGMNVMEFTR           | 380  | 14 | 5  | 33.28 | b7b10*b10y3y4            | 1720.82 | 71.418  | 11920  | 3 | 574.28  | -6.31  |
| P35580 MYH10_HUMAN Myosin-10 | 9  |                       | ADMEDLMSSKDDVVGK         | 1510 | 15 | 5  | 44.25 | b7y3y5y6y7               | 1640.73 | 46.375  | 8272   | 2 | 820.87  | 6.77   |
| P35580 MYH10_HUMAN Myosin-10 | 10 |                       | IVGLDQVTGMTETAFGSAYK     | 624  | 20 | 9  | 52.83 | b4b18y3y5°y5y7y10y17°y17 | 2088.01 | 105.461 | 4479   | 2 | 1044.51 | -9.70  |
| P35580 MYH10_HUMAN Myosin-10 | 11 |                       | ELEAELEDER               | 1599 | 10 | 6  | 54.69 | b8b9°b9y4y8y9            | 1232.55 | 32.141  | 2764   | 3 | 411.52  | -10.70 |
| P35580 MYH10_HUMAN Myosin-10 | 12 |                       | ESLTK                    | 658  | 5  | 5  | 39.91 | b3°b3b4y3°y3             | 577.32  | 39.136  | 410404 | 1 | 577.32  | -0.42  |
| P35580 MYH10_HUMAN Myosin-10 | 13 |                       | NTNPNFVR                 | 669  | 8  | 4  | 49.63 | b7y3y5y6                 | 961.48  | 32.748  | 63143  | 2 | 481.25  | -1.33  |
| P35580 MYH10_HUMAN Myosin-10 | 14 |                       | AGVLAHLEER               | 771  | 11 | 3  | 31.5  | y5y6y8                   | 1223.63 | 50.433  | 50130  | 2 | 612.32  | -4.39  |
| P35580 MYH10_HUMAN Myosin-10 | 15 |                       | HQQLLEEK                 | 881  | 8  | 5  | 41.1  | b3*b3b6b7°b7             | 1024.53 | 46.393  | 27195  | 2 | 512.77  | -8.94  |
| P35580 MYH10_HUMAN Myosin-10 | 16 |                       | QLHLEGASLELSDDDTESK      | 1944 | 19 | 4  | 15.08 | b3*b3b6y5                | 2086.96 | 35.902  | 22582  | 3 | 696.33  | -7.25  |
| P35580 MYH10_HUMAN Myosin-10 | 17 |                       | ALAYDK                   | 1411 | 6  | 1  | 13.7  | y3                       | 680.36  | 33.613  | 16229  | 1 | 680.36  | 0.72   |
| P35580 MYH10_HUMAN Myosin-10 | 18 |                       | SALLDEK                  | 1724 | 7  | 5  | 37.69 | b3°b3y3y4°y4             | 775.43  | 63.912  | 9386   | 2 | 388.22  | 15.98  |
| P35580 MYH10_HUMAN Myosin-10 | 19 |                       | QEVMSIDLEER              | 1031 | 11 | 3  | 31.5  | y5y7y8                   | 1348.63 | 41.038  | 9022   | 2 | 674.82  | -9.50  |
| P35580 MYH10_HUMAN Myosin-10 | 20 |                       | LLIK                     | 1592 | 4  | 1  | 12.91 | y3                       | 486.37  | 54.866  | 7691   | 1 | 486.37  | 9.29   |
| P35580 MYH10_HUMAN Myosin-10 | 21 |                       | LQNELDNVSTLLEAAEK        | 1284 | 17 | 4  | 23.88 | b4b10b13*b13             | 1944.96 | 64.917  | 7054   | 3 | 648.99  | -7.15  |
| P35580 MYH10_HUMAN Myosin-10 | 22 |                       | DAASLESQLQDTQELLQEETR    | 1308 | 21 | 5  | 14    | b8b10*b10y13*y13         | 2404.14 | 79.255  | 6034   | 3 | 802.05  | -4.87  |
| P35580 MYH10_HUMAN Myosin-10 | 23 |                       | LNLSSR                   | 1331 | 6  | 1  | 13.7  | y5                       | 689.39  | 27.191  | 4630   | 1 | 689.39  | -9.21  |
| P35580 MYH10_HUMAN Myosin-10 | 24 | Carbamidomethyl+C(12) | ITDIIIFQAVCR             | 785  | 13 | 3  | 30.07 | y3y5y9                   | 1595.87 | 66.085  | 4524   | 3 | 532.63  | 7.57   |
| P35580 MYH10_HUMAN Myosin-10 | 25 |                       | ADMEDLMSSK               | 1510 | 10 | 5  | 40.42 | b9y6y8y9°y9              | 1126.47 | 25.921  | 4071   | 3 | 376.16  | -5.09  |
| P35580 MYH10_HUMAN Myosin-10 | 26 |                       | QLEEEK                   | 1339 | 6  | 2  | 13.7  | y3°y3                    | 775.38  | 33.606  | 4015   | 1 | 775.38  | -10.00 |
| P35580 MYH10_HUMAN Myosin-10 | 27 |                       | NLPIYSENIEMYR            | 129  | 14 | 4  | 19.46 | b6b8°b8y8                | 1754.89 | 62.824  | 3691   | 3 | 585.63  | 4.10   |
| P35580 MYH10_HUMAN Myosin-10 | 28 |                       | HADQYK                   | 1863 | 6  | 2  | 27    | b3y5                     | 761.35  | 28.853  | 3203   | 1 | 761.35  | -7.86  |
| P35580 MYH10_HUMAN Myosin-10 | 29 |                       | QELEEILDLESR             | 917  | 13 | 4  | 30.07 | y4°y4y6y12               | 1610.78 | 87.107  | 2056   | 3 | 537.60  | -16.22 |
| P35580 MYH10_HUMAN Myosin-10 | 30 |                       | LDAQVQELHAK              | 1256 | 11 | 4  | 24.51 | b5b9°b9y6                | 1251.65 | 30.196  | 2008   | 3 | 417.89  | -18.92 |
| P35580 MYH10_HUMAN Myosin-10 | 31 |                       | LDGETTDLQDQIAELQAQIDELK  | 1059 | 23 | 3  | 13.16 | b4b8y4                   | 2586.24 | 135.582 | 1934   | 3 | 862.75  | -16.05 |
| P35580 MYH10_HUMAN Myosin-10 | 32 |                       | ALEQQVEEMR               | 1535 | 10 | 10 | 87.32 | b4°b4b5b6y5y6y7°y7y9°y9  | 1232.58 | 136.288 | 1889   | 1 | 1232.58 | -8.62  |
| P35580 MYH10_HUMAN Myosin-10 | 33 |                       | NILAEQLQAETELFAEAEEMR    | 889  | 21 | 3  | 14    | b7y11y13                 | 2435.14 | 105.364 | 1680   | 3 | 812.38  | -15.84 |
| P35580 MYH10_HUMAN Myosin-10 | 34 |                       | DVDRIVGLDQVTGMTETAFGSAYK | 620  | 24 | 6  | 28.5  | y7°y7y8°y8y10y12         | 2573.23 | 121.797 | 380151 | 3 | 858.42  | -9.01  |



|                              |    |                                                |                                 |      |    |    |       |                                          |         |         |        |   |         |        |
|------------------------------|----|------------------------------------------------|---------------------------------|------|----|----|-------|------------------------------------------|---------|---------|--------|---|---------|--------|
| P35580 MYH10_HUMAN Myosin-10 | 35 |                                                | LEVNMQAMKAQFER                  | 1564 | 14 | 4  | 31.01 | b3b12b13y11                              | 1694.83 | 97.895  | 202917 | 2 | 847.92  | -3.53  |
| P35580 MYH10_HUMAN Myosin-10 | 36 |                                                | LKSLEAEILQEQEELASSER            | 1681 | 20 | 5  | 21.3  | y7°y7y9y11°y11                           | 2286.19 | 64.851  | 147583 | 2 | 1143.60 | -11.53 |
| P35580 MYH10_HUMAN Myosin-10 | 37 |                                                | EIFMQVEDERR                     | 1852 | 11 | 4  | 24.51 | b5b10y9*y9                               | 1451.71 | 64.838  | 87049  | 2 | 726.36  | 7.06   |
| P35580 MYH10_HUMAN Myosin-10 | 38 |                                                | FAKDAASLESQEQDTELLQEETR         | 1305 | 24 | 3  | 22.11 | b4b5y5                                   | 2750.32 | 73.733  | 65196  | 3 | 917.44  | -11.10 |
| P35580 MYH10_HUMAN Myosin-10 | 39 |                                                | QTKVEGELEEMER                   | 867  | 13 | 7  | 50.65 | b7°b7b8b11b12y12°y12                     | 1577.73 | 63.872  | 51065  | 3 | 526.58  | -11.30 |
| P35580 MYH10_HUMAN Myosin-10 | 40 | Carbamidomethyl+C(9)                           | LMEDRIAECSSQLAEIEEEK            | 1002 | 19 | 4  | 15.08 | b6°b6b9y5                                | 2267.04 | 38.004  | 45004  | 4 | 567.52  | 11.85  |
| P35580 MYH10_HUMAN Myosin-10 | 41 |                                                | RHEMPPHIYAISESAYR               | 146  | 17 | 3  | 16.47 | b7b13y16                                 | 2056.99 | 72.112  | 39284  | 3 | 686.34  | -4.04  |
| P35580 MYH10_HUMAN Myosin-10 | 42 |                                                | RGGPISFSSSR                     | 1929 | 11 | 4  | 31.5  | y6y7°y7y9                                | 1150.61 | 98.665  | 36190  | 2 | 575.81  | 9.34   |
| P35580 MYH10_HUMAN Myosin-10 | 43 |                                                | DAASLESQEQDTELLQEETRQK          | 1308 | 23 | 5  | 24    | b9°b9b10b14y6                            | 2660.30 | 97.755  | 27436  | 3 | 887.44  | -1.47  |
| P35580 MYH10_HUMAN Myosin-10 | 44 |                                                | DAEALSQRLEEK                    | 1399 | 12 | 3  | 29.67 | y4y6y7                                   | 1388.69 | 57.242  | 16935  | 2 | 694.85  | -6.33  |
| P35580 MYH10_HUMAN Myosin-10 | 45 |                                                | KALEEETK                        | 1180 | 8  | 4  | 33.32 | b6°b6y4y5                                | 947.49  | 41.219  | 16041  | 2 | 474.25  | -13.59 |
| P35580 MYH10_HUMAN Myosin-10 | 46 |                                                | DLSEEELEALKTELEDLDTTAAQQ<br>ELR | 1142 | 27 | 4  | 15.5  | b3b8y10y13                               | 3061.49 | 108.606 | 14307  | 3 | 1021.17 | -5.42  |
| P35580 MYH10_HUMAN Myosin-10 | 47 |                                                | ELQAQIAELQEDFESEKASR            | 1114 | 20 | 3  | 14.51 | b5b7y9                                   | 2321.13 | 79.011  | 11045  | 3 | 774.38  | 3.68   |
| P35580 MYH10_HUMAN Myosin-10 | 48 |                                                | QLRADMEDLMSSK                   | 1507 | 13 | 4  | 39.57 | b8y4y5y6                                 | 1523.73 | 88.781  | 10079  | 2 | 762.37  | 6.57   |
| P35580 MYH10_HUMAN Myosin-10 | 49 |                                                | YLFVDRAVIYNPATQADWTAK           | 12   | 21 | 5  | 14    | b4y12°y12y14°y14                         | 2442.21 | 108.848 | 8804   | 3 | 814.74  | -14.00 |
| P35580 MYH10_HUMAN Myosin-10 | 50 | Carbamidomethyl+C(1);<br>Carbamidomethyl+C(13) | CMLQDREDQSILCTGESGAGK           | 163  | 21 | 3  | 14    | b12y6y8                                  | 2355.07 | 75.652  | 8747   | 2 | 1178.04 | 13.89  |
| P35580 MYH10_HUMAN Myosin-10 | 51 |                                                | QLEEEKNSLQEQEEEEEAR             | 1339 | 20 | 4  | 22.64 | b10y4°y4y5                               | 2475.13 | 124.098 | 8164   | 3 | 825.71  | 6.21   |
| P35580 MYH10_HUMAN Myosin-10 | 52 |                                                | LEARIAQLEEEEEEQSNMELLND<br>R    | 1733 | 25 | 3  | 12.5  | b14y6y8                                  | 3001.41 | 61.441  | 8062   | 3 | 1001.14 | -11.23 |
| P35580 MYH10_HUMAN Myosin-10 | 53 |                                                | DELADEITNSASGKSALLDEK           | 1710 | 21 | 3  | 22.45 | b7b8y13                                  | 2206.10 | 108.617 | 7746   | 2 | 1103.56 | 14.05  |
| P35580 MYH10_HUMAN Myosin-10 | 54 |                                                | SDLLLEGFNRYRFLSNGYIPIPGQ<br>DK  | 296  | 27 | 12 | 36.64 | b6b10b13°b13*b13y3y4<br>y6°y6y12°y12*y12 | 3098.54 | 91.746  | 7722   | 3 | 1033.52 | -5.91  |
| P35580 MYH10_HUMAN Myosin-10 | 55 |                                                | LRLEVNMQAMK                     | 1562 | 11 | 3  | 31.5  | y3y4y6                                   | 1332.72 | 93.062  | 7283   | 2 | 666.86  | 4.40   |
| P35580 MYH10_HUMAN Myosin-10 | 56 |                                                | NRLQEQELDDLTVDLDHQR             | 1422 | 18 | 4  | 21.98 | b8b11y6y8                                | 2208.10 | 74.244  | 7177   | 3 | 736.71  | 1.33   |
| P35580 MYH10_HUMAN Myosin-10 | 57 |                                                | QRHATALEELSEQLEQAK              | 1198 | 18 | 5  | 15.73 | b5*b5y4°y4y9                             | 2081.08 | 114.866 | 7131   | 3 | 694.36  | 7.27   |
| P35580 MYH10_HUMAN Myosin-10 | 58 |                                                | ASKLQNELDNVSTLLEAEK             | 1281 | 20 | 4  | 14.51 | b13°b13y6y13                             | 2231.12 | 110.623 | 5731   | 3 | 744.38  | -8.32  |
| P35580 MYH10_HUMAN Myosin-10 | 59 |                                                | ALEEETKNHEAQIQDMR               | 1181 | 17 | 4  | 16.47 | b7b11°b11y8                              | 2041.93 | 65.243  | 5712   | 2 | 1021.47 | -14.23 |
| P35580 MYH10_HUMAN Myosin-10 | 60 |                                                | EQMEKANAR                       | 1869 | 9  | 3  | 38.48 | b4b5b8                                   | 1076.52 | 54.671  | 5079   | 1 | 1076.52 | 8.84   |
| P35580 MYH10_HUMAN Myosin-10 | 61 |                                                | TFVEKLVQEQGSHSK                 | 547  | 15 | 3  | 18.31 | b13y5y11                                 | 1716.88 | 54.661  | 4205   | 3 | 572.96  | -9.17  |
| P35580 MYH10_HUMAN Myosin-10 | 62 |                                                | MQAHIQDLEEQLEDEEGARQK           | 947  | 21 | 3  | 14    | b3b5y8                                   | 2497.13 | 124.137 | 4167   | 3 | 833.05  | -14.18 |

|                              |    |                                          |                                  |      |    |    |        |                                                                                       |         |         |        |   |         |        |
|------------------------------|----|------------------------------------------|----------------------------------|------|----|----|--------|---------------------------------------------------------------------------------------|---------|---------|--------|---|---------|--------|
| P35580 MYH10_HUMAN Myosin-10 | 63 |                                          | EEELQGALARGDDETLHK               | 1088 | 18 | 4  | 15.73  | b9b11*b11y14                                                                          | 2011.00 | 114.261 | 3768   | 2 | 1006.00 | 14.63  |
| P35580 MYH10_HUMAN Myosin-10 | 64 |                                          | NILAEQLQAETELFAEAEEMRRAR         | 889  | 23 | 3  | 19.57  | y3y8y21                                                                               | 2662.31 | 80.941  | 2954   | 2 | 1331.66 | -0.55  |
| P35580 MYH10_HUMAN Myosin-10 | 65 |                                          | QLEEAEEEEATRANASR                | 1884 | 16 | 4  | 17.33  | b4y5*y5y15                                                                            | 1803.86 | 60.716  | 2826   | 2 | 902.43  | 8.46   |
| P35580 MYH10_HUMAN Myosin-10 | 66 |                                          | HGFEAASIKEER                     | 42   | 12 | 5  | 34.53  | b11*b11y3y9y10                                                                        | 1373.66 | 64.984  | 2824   | 3 | 458.56  | -11.91 |
| P35580 MYH10_HUMAN Myosin-10 | 67 |                                          | ALEQQVEEMRTQLEEELEDELQAT<br>EDAK | 1535 | 27 | 3  | 18.07  | y4y14y21                                                                              | 3175.47 | 92.964  | 2537   | 3 | 1059.16 | -7.15  |
| P35580 MYH10_HUMAN Myosin-10 | 68 |                                          | TELEDTLDTTAAQQLRTK               | 1152 | 19 | 3  | 15.08  | b4b13y13                                                                              | 2163.11 | 102.713 | 2439   | 3 | 721.71  | 13.43  |
| P35580 MYH10_HUMAN Myosin-10 | 69 | Carbamidomethyl+C(12)                    | QGLETDNKELACEVK                  | 1226 | 15 | 6  | 29.7   | b6y3y4y11*y11*y11                                                                     | 1733.83 | 91.074  | 2418   | 2 | 867.42  | -3.31  |
| P35580 MYH10_HUMAN Myosin-10 | 70 |                                          | NKQEVMSIDLEER                    | 1029 | 13 | 4  | 20.83  | b10y3y12*y12                                                                          | 1590.79 | 50.528  | 2209   | 3 | 530.94  | 8.29   |
| P35580 MYH10_HUMAN Myosin-10 | 71 | Carbamidomethyl+C(4)                     | IAECSSQLAEIEEKAK                 | 1007 | 16 | 4  | 17.33  | b8*b8y8y13                                                                            | 1821.86 | 107.328 | 1518   | 2 | 911.43  | 4.69   |
| P35580 MYH10_HUMAN Myosin-10 | 72 | Phosphoryl STY(17)                       | ELDDATEANEGLSREVSTLK             | 1905 | 20 | 3  | 14.51  | b15y4y7                                                                               | 2256.98 | 62.809  | 10416  | 2 | 1129.00 | -13.63 |
| P35580 MYH10_HUMAN Myosin-10 | 73 | Phosphoryl STY(13)                       | AVIYNPATQADWTAK                  | 18   | 15 | 5  | 26.39  | b11* <sup>o</sup> b11b12*b12b14_H<br>3PO4 b14                                         | 1728.78 | 136.779 | 4860   | 1 | 1728.78 | -3.18  |
| P35580 MYH10_HUMAN Myosin-10 | 74 | Phosphoryl STY(10)                       | LQNELDNVSTLLEAEKK                | 1284 | 18 | 3  | 15.73  | b11y7y10                                                                              | 2153.01 | 57.286  | 1980   | 2 | 1077.01 | -8.39  |
| P35580 MYH10_HUMAN Myosin-10 | 75 | Oxidation+M(8)                           | VEGELEEMER                       | 870  | 10 | 4  | 40.42  | b4b8b9y3                                                                              | 1236.56 | 41.292  | 138800 | 2 | 618.78  | 14.71  |
| P35580 MYH10_HUMAN Myosin-10 | 76 | Oxidation+M(2)                           | NMDPLNDNVATLLHQSSDR              | 594  | 19 | 6  | 23.88  | b13y3y7y9*y9*y9                                                                       | 2156.00 | 59.123  | 69212  | 3 | 719.34  | 0.23   |
| P35580 MYH10_HUMAN Myosin-10 | 77 | Carbamidomethyl+C(2);<br>Oxidation+M(10) | LCHLLGMNVMEFTR                   | 380  | 14 | 3  | 19.46  | b5b8y5                                                                                | 1736.83 | 84.549  | 16457  | 2 | 868.92  | 2.25   |
| P35580 MYH10_HUMAN Myosin-10 | 78 | Oxidation+M(4)                           | EIFMQVEDERR                      | 1852 | 11 | 4  | 24.51  | b4y6*y6y8                                                                             | 1467.71 | 114.985 | 11461  | 3 | 489.91  | 13.22  |
| P35580 MYH10_HUMAN Myosin-10 | 79 | Oxidation+M(15)                          | IAQLEEELEEEQSNMELLNDR            | 1737 | 21 | 5  | 24.92  | b7b10b11y9*y9                                                                         | 2548.19 | 124.111 | 3918   | 3 | 850.07  | 5.17   |
| P35580 MYH10_HUMAN Myosin-10 | 80 | Oxidation+M(9)                           | NHEAQIQDMR                       | 1188 | 10 | 3  | 27.12  | b4y5y9                                                                                | 1257.57 | 81.711  | 2324   | 1 | 1257.57 | 4.27   |
| P35580 MYH10_HUMAN Myosin-10 | 81 | Oxidation+M(8)                           | LEVNMQAMK                        | 1564 | 9  | 3  | 30.7   | b5y3y4                                                                                | 1079.53 | 55.857  | 2115   | 2 | 540.27  | 8.37   |
| P35580 MYH10_HUMAN Myosin-10 | 82 |                                          | TGMTETAFGSAYK                    | 631  | 13 | 0  | 5.95   |                                                                                       | 1363.62 | 105.469 | 1542   | 1 | 1363.62 | 2.69   |
| P35580 MYH10_HUMAN Myosin-10 | 83 |                                          | ELEAELEDER                       | 1599 | 10 | 0  | 1.98   |                                                                                       | 1214.55 | 32.198  | 2213   | 3 | 405.52  | 1.01   |
| P35749 MYH11_HUMAN Myosin-11 | 1  |                                          | QLLQANPILEAFGNAK                 | 216  | 16 | 27 | 168.34 | b2*b2b3*b3b4*b4b6*b<br>6b15y2y4*y4y5y6y7*y7<br>*y7y8*y8y10y11y12y13<br>*y13y14y16*y16 | 1726.95 | 91.836  | 186854 | 2 | 863.98  | 2.40   |
| P35749 MYH11_HUMAN Myosin-11 | 2  |                                          | TQLEEELEDELQATEDAK               | 1545 | 17 | 12 | 91.72  | b11b14b15y2y4y5y6y13<br>*y13y14y15y17                                                 | 1961.93 | 79.482  | 100497 | 2 | 981.47  | 7.16   |
| P35749 MYH11_HUMAN Myosin-11 | 3  |                                          | KEEELQAALAR                      | 1087 | 11 | 10 | 117.33 | b3b4b8b10y4y5y7y9y10<br>y11                                                           | 1257.68 | 43.213  | 55663  | 2 | 629.34  | -1.75  |
| P35749 MYH11_HUMAN Myosin-11 | 4  | Carbamidomethyl+C(1)                     | CNGVLEGIR                        | 700  | 9  | 10 | 76.63  | b2*b2b4b8y1y3y4y5y7y<br>9                                                             | 1017.51 | 49.428  | 37205  | 2 | 509.26  | -4.26  |
| P35749 MYH11_HUMAN Myosin-11 | 5  |                                          | LQAQMKDFQRELEDAR                 | 1649 | 16 | 4  | 17.33  | b7b11y12y16                                                                           | 1978.00 | 58.494  | 15403  | 2 | 989.50  | 8.02   |
| P35749 MYH11_HUMAN Myosin-11 | 6  |                                          | MAEQYKEQAEK                      | 1863 | 11 | 4  | 27.52  | b3y5*y5y6                                                                             | 1354.63 | 49.232  | 10995  | 3 | 452.22  | 0.36   |

|                              |    |                       |                         |      |    |   |       |                      |         |         |        |   |         |        |
|------------------------------|----|-----------------------|-------------------------|------|----|---|-------|----------------------|---------|---------|--------|---|---------|--------|
| P35749 MYH11_HUMAN Myosin-11 | 7  |                       | ELDEATESNEAMGREVNALK    | 1905 | 20 | 3 | 14.51 | b10b15y11            | 2206.01 | 63.762  | 2202   | 3 | 736.01  | -8.74  |
| P35749 MYH11_HUMAN Myosin-11 | 8  | Carbamidomethyl+C(14) | YFSGLIYTYSGLFCVVVNPYK   | 108  | 21 | 5 | 31.48 | b7b8b10b13y11        | 2490.22 | 110.902 | 1989   | 2 | 1245.61 | -10.10 |
| P35749 MYH11_HUMAN Myosin-11 | 9  |                       | DTSITGELEK              | 206  | 10 | 5 | 27.12 | b2b4b8*b8y3          | 1092.53 | 28.006  | 1697   | 2 | 546.77  | -11.28 |
| P35749 MYH11_HUMAN Myosin-11 | 10 |                       | ALELDPNLYR              | 752  | 10 | 3 | 28.88 | b8b9y5               | 1203.61 | 32.088  | 75587  | 2 | 602.31  | -18.76 |
| P35749 MYH11_HUMAN Myosin-11 | 11 | Carbamidomethyl+C(12) | ITDVIMAFQAMCR           | 785  | 13 | 5 | 34.34 | b4b6b10*b10y9        | 1555.76 | 80.435  | 51240  | 2 | 778.38  | 8.63   |
| P35749 MYH11_HUMAN Myosin-11 | 12 |                       | FDQLLAEEK               | 1452 | 9  | 3 | 46.27 | y3y5y8               | 1092.55 | 50.810  | 37189  | 2 | 546.78  | -2.79  |
| P35749 MYH11_HUMAN Myosin-11 | 13 |                       | NTDQASMPDNTAAQK         | 365  | 15 | 6 | 36.97 | y3y4*y4y8*y8y10      | 1591.71 | 27.076  | 28325  | 2 | 796.36  | 5.22   |
| P35749 MYH11_HUMAN Myosin-11 | 14 |                       | LQDFASTVEALEEGK         | 1379 | 15 | 4 | 24.33 | b12y11y12*y12        | 1636.83 | 95.401  | 16516  | 3 | 546.28  | 11.71  |
| P35749 MYH11_HUMAN Myosin-11 | 15 |                       | QLHEYETELEDER           | 1596 | 13 | 3 | 30.07 | y4y6y10              | 1690.77 | 72.878  | 12072  | 2 | 845.89  | 9.82   |
| P35749 MYH11_HUMAN Myosin-11 | 16 |                       | TEFSIIHYAGK             | 572  | 11 | 3 | 36.27 | b3b6b10              | 1265.65 | 42.617  | 11601  | 2 | 633.33  | -3.38  |
| P35749 MYH11_HUMAN Myosin-11 | 17 |                       | LEDEILVMDDQNNK          | 982  | 14 | 5 | 27.84 | b8b11y5y12*y12       | 1675.81 | 77.484  | 10879  | 2 | 838.41  | 17.99  |
| P35749 MYH11_HUMAN Myosin-11 | 18 |                       | HAQAVEELTEQLEQFK        | 1200 | 16 | 3 | 17.33 | b5b8y11              | 1899.94 | 55.420  | 10085  | 3 | 633.99  | -0.71  |
| P35749 MYH11_HUMAN Myosin-11 | 19 | Carbamidomethyl+C(2)  | VCHLMGINVTDFTFR         | 380  | 14 | 3 | 19.46 | b4b13y5              | 1662.78 | 79.111  | 8582   | 3 | 554.93  | -19.31 |
| P35749 MYH11_HUMAN Myosin-11 | 20 |                       | SMLQDR                  | 163  | 6  | 2 | 13.7  | b4*b4                | 749.36  | 100.331 | 5071   | 1 | 749.36  | 3.18   |
| P35749 MYH11_HUMAN Myosin-11 | 21 |                       | NMDPLNDNVTSLLNASSDK     | 594  | 19 | 3 | 22.86 | b10y3y4              | 2047.97 | 110.271 | 4802   | 3 | 683.33  | 5.54   |
| P35749 MYH11_HUMAN Myosin-11 | 22 |                       | NLTK                    | 1023 | 4  | 1 | 12.91 | b3                   | 475.29  | 21.774  | 4770   | 1 | 475.29  | 4.49   |
| P35749 MYH11_HUMAN Myosin-11 | 23 |                       | SLEADLMQLQEDLAAER       | 1683 | 18 | 3 | 15.73 | b14y9y12             | 2003.00 | 88.149  | 4577   | 2 | 1002.00 | 10.42  |
| P35749 MYH11_HUMAN Myosin-11 | 24 |                       | IVDMYK                  | 137  | 6  | 1 | 13.7  | y3                   | 768.40  | 46.432  | 4453   | 2 | 384.71  | 9.69   |
| P35749 MYH11_HUMAN Myosin-11 | 25 |                       | LEGDASDFHEQIADLQAQIAELK | 1059 | 23 | 5 | 43.27 | b3b4b6b13b14         | 2541.28 | 126.648 | 3815   | 3 | 847.77  | 13.93  |
| P35749 MYH11_HUMAN Myosin-11 | 26 |                       | IAQLEEELEEEQGNMEAMSDR   | 1737 | 21 | 6 | 27.04 | b10b15b17*b17y14y16  | 2451.02 | 136.846 | 3394   | 2 | 1226.01 | -19.52 |
| P35749 MYH11_HUMAN Myosin-11 | 27 |                       | HESMISELEVR             | 1031 | 11 | 3 | 27.52 | b7b8y8               | 1329.63 | 40.908  | 2489   | 2 | 665.32  | -16.16 |
| P35749 MYH11_HUMAN Myosin-11 | 28 |                       | LQNEVESVTGMLNEAEGK      | 1284 | 18 | 6 | 15.73 | b6*b6y11*y11y14*y14  | 1947.92 | 71.194  | 2324   | 2 | 974.47  | -4.83  |
| P35749 MYH11_HUMAN Myosin-11 | 29 |                       | LQQELDDLVDLDNQR         | 1424 | 16 | 5 | 25.7  | y10y11*y11*y11y13    | 1912.98 | 56.164  | 2286   | 3 | 638.33  | 7.66   |
| P35749 MYH11_HUMAN Myosin-11 | 30 |                       | LQQLFNHTMFILEQEEYQR     | 482  | 19 | 8 | 41.26 | b3b7*b7y3y5y7y12*y12 | 2467.23 | 104.165 | 2275   | 3 | 823.08  | 10.29  |
| P35749 MYH11_HUMAN Myosin-11 | 31 |                       | HEMPPHIYAIADTAYR        | 147  | 16 | 6 | 38.21 | b5b8*b8b12b13y4      | 1884.93 | 47.984  | 2027   | 3 | 628.98  | 10.62  |
| P35749 MYH11_HUMAN Myosin-11 | 32 |                       | ALDEETR                 | 1181 | 7  | 5 | 37.69 | b4*b4b5*b5y5         | 833.42  | 25.840  | 1984   | 2 | 417.21  | 20.29  |
| P35749 MYH11_HUMAN Myosin-11 | 33 |                       | NSLQDQLDEEMEAKE         | 1345 | 14 | 3 | 19.46 | b7b13y9              | 1649.75 | 83.265  | 1977   | 2 | 825.38  | 12.21  |
| P35749 MYH11_HUMAN Myosin-11 | 34 |                       | GQLSDDEK                | 4    | 8  | 5 | 36.33 | b5y3*y3y7*y7         | 891.40  | 121.690 | 1703   | 1 | 891.40  | -11.09 |
| P35749 MYH11_HUMAN Myosin-11 | 35 |                       | NLLQEQLQAETELYAEAEEMRVR | 889  | 23 | 3 | 13.16 | b3b12y19             | 2763.35 | 73.377  | 120912 | 3 | 921.79  | -5.39  |

|                               |    |                                         |                                    |      |    |   |       |                                    |         |         |       |   |         |        |
|-------------------------------|----|-----------------------------------------|------------------------------------|------|----|---|-------|------------------------------------|---------|---------|-------|---|---------|--------|
| IP35749 MYH11_HUMAN Myosin-11 | 36 |                                         | IAQLEEELEEEQGNMEAMSDRVR            | 1737 | 23 | 5 | 24.84 | b11b14y8y12y22                     | 2706.27 | 71.054  | 89044 | 4 | 677.32  | 13.35  |
| IP35749 MYH11_HUMAN Myosin-11 | 37 |                                         | LQDFASTVEALEEGKK                   | 1379 | 16 | 4 | 31.04 | b3b12y11y12                        | 1764.88 | 91.899  | 38794 | 3 | 588.96  | -14.32 |
| IP35749 MYH11_HUMAN Myosin-11 | 38 |                                         | EEKGDEVVVELVENGK                   | 51   | 16 | 3 | 17.33 | b14y3y9                            | 1772.90 | 70.091  | 34144 | 2 | 886.95  | 2.75   |
| IP35749 MYH11_HUMAN Myosin-11 | 39 |                                         | NISSKYADER                         | 1461 | 10 | 4 | 27.12 | b3b8*b8y6                          | 1182.57 | 55.622  | 28557 | 2 | 591.79  | -5.16  |
| IP35749 MYH11_HUMAN Myosin-11 | 40 |                                         | TEFSIIHYAGKVDYNASAWLTK             | 572  | 22 | 4 | 27.12 | b10b11y8y11                        | 2514.28 | 67.961  | 23409 | 3 | 838.76  | 5.24   |
| IP35749 MYH11_HUMAN Myosin-11 | 41 |                                         | FQKEIENLTQQYEEK                    | 1396 | 15 | 4 | 18.31 | b10*b10y3y7                        | 1926.96 | 110.416 | 8316  | 2 | 963.98  | 7.16   |
| IP35749 MYH11_HUMAN Myosin-11 | 42 | Carbamidomethyl+C(12)                   | ITDVIMAFQAMCRGYLAR                 | 785  | 18 | 5 | 36.81 | b7y8y9y10*y10                      | 2116.02 | 101.311 | 7950  | 2 | 1058.51 | -14.19 |
| IP35749 MYH11_HUMAN Myosin-11 | 43 |                                         | QLHEYETELEDERK                     | 1596 | 14 | 4 | 31.01 | b4b5b8y11                          | 1818.85 | 57.288  | 5817  | 2 | 909.93  | -2.68  |
| IP35749 MYH11_HUMAN Myosin-11 | 44 |                                         | QEVHKK                             | 1247 | 7  | 3 | 40.7  | b3b5y4                             | 897.48  | 57.194  | 5676  | 1 | 897.48  | 3.67   |
| IP35749 MYH11_HUMAN Myosin-11 | 45 |                                         | DVASLSSQLQDTQELLQEETRQK            | 1308 | 23 | 6 | 22.19 | b4*b4y6*y6*y6y7                    | 2646.30 | 83.555  | 4827  | 4 | 662.33  | -8.49  |
| IP35749 MYH11_HUMAN Myosin-11 | 46 |                                         | KLEDEILVMDQNNK                     | 981  | 15 | 3 | 26.39 | b5b12b13                           | 1803.89 | 113.188 | 3029  | 2 | 902.45  | 6.43   |
| IP35749 MYH11_HUMAN Myosin-11 | 47 |                                         | VDYNASAWLTKNMDPLNDNVTS<br>LLNASSDK | 583  | 30 | 4 | 24.92 | b9b10y5y8                          | 3296.59 | 137.777 | 2955  | 3 | 1099.53 | 3.70   |
| IP35749 MYH11_HUMAN Myosin-11 | 48 | Carbamidomethyl+C(12)                   | LEAQVQELQSKCSDGER                  | 1256 | 17 | 5 | 23.16 | b3b12*b12y3y13                     | 1976.93 | 85.139  | 2799  | 2 | 988.97  | -3.33  |
| IP35749 MYH11_HUMAN Myosin-11 | 49 |                                         | KATQQAEQLSNELATER                  | 1760 | 17 | 3 | 16.47 | b10b12y7                           | 1916.96 | 97.875  | 2335  | 3 | 639.66  | -3.12  |
| IP35749 MYH11_HUMAN Myosin-11 | 50 |                                         | YEILAAANAIKGFMDGK                  | 727  | 17 | 6 | 39.48 | b7y3y5y7y13*y13                    | 1837.95 | 116.766 | 2040  | 3 | 613.32  | -1.53  |
| IP35749 MYH11_HUMAN Myosin-11 | 51 |                                         | EQAEKGNAR                          | 1869 | 9  | 4 | 38.48 | b5b6*b6b7                          | 1002.50 | 102.726 | 1559  | 1 | 1002.50 | 0.79   |
| IP35749 MYH11_HUMAN Myosin-11 | 52 | Phosphoryl STY(7)                       | LQDFASTVEALEEGKK                   | 1379 | 16 | 4 | 24.51 | b4b6y8y11_H3PO4 y11                | 1844.88 | 66.228  | 27946 | 3 | 615.63  | 10.72  |
| IP35749 MYH11_HUMAN Myosin-11 | 53 | Phosphoryl STY(9)                       | ASRDEIFATAKENEK                    | 1665 | 15 | 3 | 18.31 | b7y8y10                            | 1788.81 | 100.318 | 4323  | 3 | 596.94  | 3.21   |
| IP35749 MYH11_HUMAN Myosin-11 | 54 | Phosphoryl STY(6)                       | DVASLSSQLQDTQELLQEETR              | 1308 | 21 | 4 | 23.66 | y12y14_HPO3<br>y14y15_HPO3 y15*y15 | 2470.16 | 136.822 | 3286  | 2 | 1235.58 | 14.03  |
| IP35749 MYH11_HUMAN Myosin-11 | 55 | Phosphoryl STY(6)                       | EIENLTQQYEEK                       | 1399 | 12 | 3 | 22.47 | b4b8_HPO3 b8y5                     | 1603.69 | 42.647  | 2012  | 2 | 802.35  | 7.84   |
| IP35749 MYH11_HUMAN Myosin-11 | 56 | Phosphoryl STY()                        | LQQLFNHTMFILEQEEYQR                | 482  | 19 | 4 | 34.67 | y11y12*y12y13                      | 2547.14 | 72.838  | 1636  | 2 | 1274.07 | -10.35 |
| IP35749 MYH11_HUMAN Myosin-11 | 57 | Carbamidomethyl+C(13)<br>;Oxidation+M() | SMLQDREDQSILCTGESGAGK              | 163  | 21 | 4 | 20.65 | y4y6y15*y15                        | 2298.06 | 90.183  | 25281 | 2 | 1149.53 | 10.94  |
| IP35749 MYH11_HUMAN Myosin-11 | 58 | Oxidation+M(8)                          | TFHIFYMIAGAKEK                     | 279  | 15 | 4 | 26.39 | b3*b3b4b13                         | 1834.90 | 58.655  | 23744 | 3 | 612.31  | -8.25  |
| IP35749 MYH11_HUMAN Myosin-11 | 59 | Oxidation+M(11)                         | NSLQDQLDEEMEAKEK                   | 1345 | 14 | 4 | 27.25 | b3*b3b4b6                          | 1665.74 | 96.815  | 7913  | 2 | 833.37  | 7.04   |
| IP35749 MYH11_HUMAN Myosin-11 | 60 | Oxidation+M(3)                          | AEMEDLVSSKDDVVGK                   | 1510 | 15 | 5 | 43.46 | b12b13y5y8y12                      | 1638.73 | 102.697 | 1552  | 3 | 546.92  | -11.25 |
| IP35749 MYH11_HUMAN Myosin-11 | 61 |                                         | QMKDFQRELEDAR                      | 1652 | 13 | 2 | 14.44 | b5b10                              | 1665.82 | 58.492  | 1999  | 2 | 833.41  | 10.55  |
| IP35749 MYH11_HUMAN Myosin-11 | 62 |                                         | ELDEATESNEAMGREVNALK               | 1905 | 20 | 2 | 9.04  | b16y16                             | 2188.02 | 63.780  | 18198 | 3 | 730.01  | 4.24   |

|                                  |    |                       |                            |     |    |    |        |                                                                              |         |         |        |   |         |        |
|----------------------------------|----|-----------------------|----------------------------|-----|----|----|--------|------------------------------------------------------------------------------|---------|---------|--------|---|---------|--------|
| P37802 TAGL2_HUMAN Transgeline-2 | 1  | Carbamidomethyl+C(6)  | DGTVLCELINALYPEGQAPVKK     | 57  | 22 | 27 | 197.4  | b2b3°b3b4°b4b5°b5b6b10b11°b11b12b13b22y2y4y5y7y9y11y13*y13y14y16y17y18y22    | 2415.26 | 106.314 | 329047 | 3 | 805.76  | -1.52  |
| P37802 TAGL2_HUMAN Transgeline-2 | 2  |                       | YGINTTDIFQTVDLWEGK         | 102 | 18 | 27 | 238.36 | b2b3b4b5b6b7b12b13°b13b14y2y3°y3y4y5y6y8°y8y9*y9y10°y10y12y13y14y15y18       | 2100.04 | 101.394 | 248210 | 2 | 1050.52 | 6.51   |
| P37802 TAGL2_HUMAN Transgeline-2 | 3  |                       | TLMNLGGLAVAR               | 127 | 12 | 10 | 80.33  | b2b4b5y2y4y7y8y9y10y12                                                       | 1215.69 | 73.372  | 200535 | 2 | 608.35  | 0.90   |
| P37802 TAGL2_HUMAN Transgeline-2 | 4  |                       | DDGLFSGDPNWFPPK            | 139 | 15 | 9  | 45.04  | b2b3y1y2y3y7y11y14y15                                                        | 1722.80 | 77.155  | 189231 | 3 | 574.94  | -4.32  |
| P37802 TAGL2_HUMAN Transgeline-2 | 5  |                       | DDGLFSGDPNWFPPK            | 139 | 14 | 12 | 84.43  | b2b3b4b5b6y2y3y6*y6y9y10y14                                                  | 1594.73 | 87.884  | 155043 | 2 | 797.87  | 8.96   |
| P37802 TAGL2_HUMAN Transgeline-2 | 6  |                       | IQASTMAFK                  | 79  | 9  | 13 | 62.08  | b7°b7°b7y1y2y3y5°y5y6°y6y7°y7y9                                              | 996.52  | 46.486  | 142454 | 2 | 498.76  | -1.96  |
| P37802 TAGL2_HUMAN Transgeline-2 | 7  |                       | QMEQISQLQAAER              | 88  | 14 | 21 | 154.75 | b3°b3°b3b4°b4°b4b5°b5°b5b14y3y4y5*y5y6y7y9y10y11y12y14                       | 1678.83 | 81.160  | 123666 | 2 | 839.92  | 4.65   |
| P37802 TAGL2_HUMAN Transgeline-2 | 8  |                       | NFSDNQLQEGK                | 160 | 11 | 18 | 114.32 | b4°b4°b4y2y3°y3y4°y4y5y6y7y8*y8y9°y9*y9y10y11                                | 1279.59 | 36.874  | 108202 | 2 | 640.30  | 0.10   |
| P37802 TAGL2_HUMAN Transgeline-2 | 9  | Carbamidomethyl+C(18) | QYDADLEQLIQWITTQCRK        | 20  | 20 | 20 | 97.02  | b1b2°b2b10°b10b11b20y2y4y6°y6y8°y8y9°y9y10y15y16y18y20                       | 2522.28 | 108.889 | 80985  | 3 | 841.43  | 2.13   |
| P37802 TAGL2_HUMAN Transgeline-2 | 10 | Carbamidomethyl+C(18) | QYDADLEQLIQWITTQCR         | 20  | 19 | 29 | 200.69 | b2b6°b6b8b9b10°b10°b10b11b12b13b14y1y2y3*y3y4y5°y5y6°y6*y6y7°y7y8y9y10y16y19 | 2394.17 | 116.294 | 79541  | 3 | 798.73  | -3.37  |
| P37802 TAGL2_HUMAN Transgeline-2 | 11 |                       | DVGRPQPQRENFGNWLK          | 40  | 17 | 10 | 57.33  | b4b6°b6b11°b11b15y9y12y13y17                                                 | 2041.02 | 72.879  | 55153  | 2 | 1021.01 | -10.23 |
| P37802 TAGL2_HUMAN Transgeline-2 | 12 |                       | GASQAGMTGYGMPR             | 182 | 14 | 12 | 51.13  | b3°b3b5°b5°b5y6y7°y7y9y12y14*y14                                             | 1383.62 | 45.477  | 21516  | 2 | 692.31  | 2.65   |
| P37802 TAGL2_HUMAN Transgeline-2 | 13 |                       | KDVGRPQPQRENFGNWLK         | 39  | 18 | 5  | 24.65  | y3y7*y7y8°y8                                                                 | 2169.14 | 84.442  | 14744  | 3 | 723.72  | 3.49   |
| P37802 TAGL2_HUMAN Transgeline-2 | 14 | Carbamidomethyl+C(6)  | DGTVLCELINALYPEGQAPVKK     | 57  | 21 | 6  | 38.5   | b5b6y3y4y8*y8                                                                | 2287.17 | 112.873 | 13965  | 2 | 1144.09 | 2.67   |
| P37802 TAGL2_HUMAN Transgeline-2 | 15 | Carbamidomethyl+C(4)  | NMACVQR                    | 120 | 7  | 3  | 40.7   | y3y5y6                                                                       | 878.40  | 22.963  | 2410   | 2 | 439.70  | 6.11   |
| P37802 TAGL2_HUMAN Transgeline-2 | 16 | Carbamidomethyl+C(4)  | NMACVQR TLMNLGGLAVAR       | 120 | 19 | 3  | 22.04  | b8b12b14                                                                     | 2075.07 | 72.743  | 70669  | 3 | 692.36  | 3.65   |
| P37802 TAGL2_HUMAN Transgeline-2 | 17 | Carbamidomethyl+C(22) | YGINTTDIFQTVDLWEGKNMACVQR  | 102 | 25 | 8  | 27.26  | b6b10°b10b11°b11y9y12*y12                                                    | 2959.41 | 129.760 | 24569  | 3 | 987.14  | -0.91  |
| P37802 TAGL2_HUMAN Transgeline-2 | 18 |                       | ENPRNFSDNQLQEGK            | 156 | 15 | 3  | 24.33  | b5b6y13                                                                      | 1775.81 | 73.902  | 9872   | 3 | 592.61  | -9.49  |
| P37802 TAGL2_HUMAN Transgeline-2 | 19 |                       | ANRGPAYGLSR                | 1   | 11 | 3  | 31.5   | y4y7y8                                                                       | 1161.60 | 33.573  | 9601   | 2 | 581.30  | -14.08 |
| P37802 TAGL2_HUMAN Transgeline-2 | 20 |                       | NVIGLQMGNTNRGASQAGMTGYGMPR | 171 | 25 | 4  | 28.05  | y4y5y13y15                                                                   | 2567.21 | 88.910  | 7590   | 3 | 856.41  | -6.85  |
| P37802 TAGL2_HUMAN Transgeline-2 | 21 | Carbamidomethyl+C(18) | QYDADLEQLIQWITTQCRK        | 20  | 20 | 4  | 25.47  | b16y8y9y15                                                                   | 2522.28 | 136.854 | 4801   | 2 | 1261.64 | 4.07   |
| P37802 TAGL2_HUMAN Transgeline-2 | 22 |                       | GASQAGMTGYGMPRQIL          | 182 | 17 | 5  | 16.47  | b15y6y11°y11*y11                                                             | 1737.85 | 87.965  | 2877   | 3 | 579.96  | 5.55   |

|                                                         |    |                       |                                                   |     |    |    |       |                                 |         |         |        |   |         |        |
|---------------------------------------------------------|----|-----------------------|---------------------------------------------------|-----|----|----|-------|---------------------------------|---------|---------|--------|---|---------|--------|
| P37802 TAGL2_HUMAN Transgelin-2                         | 23 | Oxidation+M(2)        | QMEQISQFLQAAER                                    | 88  | 14 | 3  | 24.9  | b5b6y11                         | 1694.82 | 93.034  | 2804   | 2 | 847.91  | 1.44   |
| P37802 TAGL2_HUMAN Transgelin-2                         | 24 |                       | FSGDPNWFPPKK                                      | 143 | 11 | 1  | 7.27  | b4                              | 1322.67 | 77.158  | 19763  | 2 | 661.84  | 13.38  |
| P37802 TAGL2_HUMAN Transgelin-2                         | 25 |                       | PEGQAPVKK                                         | 70  | 9  | 6  | 40.36 | b4b5°b5b7°b7b8                  | 953.54  | 106.327 | 8298   | 2 | 477.27  | -3.39  |
| P37802 TAGL2_HUMAN Transgelin-2                         | 26 | Carbamidomethyl+C(15) | ADLEQLIQWITTQCR                                   | 23  | 16 | 2  | 13.24 | b3b15                           | 1988.00 | 116.313 | 1874   | 2 | 994.50  | -12.28 |
| P37802 TAGL2_HUMAN Transgelin-2                         | 27 |                       | DDGLFSGDPNWFPPKK                                  | 139 | 15 | 0  | 3.97  |                                 | 1704.79 | 77.126  | 6960   | 3 | 568.94  | -1.65  |
| P50552 VASP_HUMAN Vasodilator-stimulated phosphoprotein | 1  |                       | VQIYHNPTANSFR                                     | 35  | 13 | 6  | 58.89 | y6y7°y7y8y9y11                  | 1546.76 | 46.123  | 51917  | 3 | 516.26  | -9.55  |
| P50552 VASP_HUMAN Vasodilator-stimulated phosphoprotein | 2  |                       | QQPGPSEHIER                                       | 143 | 11 | 10 | 82.19 | b2y2y3y4y5°y5y6°y6y7y9          | 1277.62 | 24.948  | 16298  | 3 | 426.54  | -5.92  |
| P50552 VASP_HUMAN Vasodilator-stimulated phosphoprotein | 3  |                       | DESANQEEPEAR                                      | 286 | 12 | 6  | 34.53 | b2b5y2y4y7y8                    | 1374.58 | 19.619  | 8099   | 2 | 687.79  | 1.07   |
| P50552 VASP_HUMAN Vasodilator-stimulated phosphoprotein | 4  |                       | EDAAQFAAGMASALELEGGGPP<br>PPPALPTWSVPNGPSPEEVEQQR | 96  | 47 | 5  | 11.2  | b2b9y2y14y26                    | 4781.32 | 112.514 | 5725   | 4 | 1196.08 | 0.31   |
| P50552 VASP_HUMAN Vasodilator-stimulated phosphoprotein | 5  |                       | YNQATPNFHQWR                                      | 71  | 12 | 4  | 22.47 | b8y5*y5y9                       | 1561.76 | 49.725  | 34395  | 3 | 521.26  | 19.23  |
| P50552 VASP_HUMAN Vasodilator-stimulated phosphoprotein | 6  |                       | SGGGGLMEEMNAMLAR                                  | 257 | 16 | 4  | 17.33 | b9°b9b14y6                      | 1623.75 | 88.925  | 14396  | 2 | 812.38  | 10.75  |
| P50552 VASP_HUMAN Vasodilator-stimulated phosphoprotein | 7  |                       | WLPAGTGPQAFSR                                     | 22  | 13 | 7  | 72.28 | b3b4b5b8b9y6y9                  | 1387.69 | 38.017  | 9524   | 2 | 694.35  | -12.40 |
| P50552 VASP_HUMAN Vasodilator-stimulated phosphoprotein | 8  | Carbamidomethyl+C(11) | MQPDQVVINCAIVR                                    | 53  | 15 | 3  | 18.31 | b8b13y6                         | 1770.91 | 76.370  | 8702   | 2 | 885.96  | 4.27   |
| P50552 VASP_HUMAN Vasodilator-stimulated phosphoprotein | 9  | Carbamidomethyl+C(13) | SSSSVTTSETQPCTPSSSDYSDLQR                         | 321 | 25 | 10 | 55.4  | b11°b11b12*b12b13y3y5y10*y10y11 | 2707.16 | 45.574  | 5070   | 3 | 903.06  | -0.81  |
| P50552 VASP_HUMAN Vasodilator-stimulated phosphoprotein | 10 | Carbamidomethyl+C(6)  | SETVICSSR                                         | 1   | 9  | 5  | 30.7  | b4°b4b7°b7y6                    | 1038.49 | 108.694 | 3853   | 1 | 1038.49 | 5.88   |
| P50552 VASP_HUMAN Vasodilator-stimulated phosphoprotein | 11 | Carbamidomethyl+C(7)  | MSETVICSSR                                        | 0   | 10 | 4  | 40.42 | b9y5y6y8                        | 1169.52 | 37.840  | 3542   | 1 | 1169.52 | -3.65  |
| P50552 VASP_HUMAN Vasodilator-stimulated phosphoprotein | 12 |                       | QEEASGGPTAPK                                      | 240 | 12 | 4  | 48.21 | y6y7y10y11                      | 1171.55 | 136.257 | 1779   | 1 | 1171.55 | -6.56  |
| P50552 VASP_HUMAN Vasodilator-stimulated phosphoprotein | 13 |                       | QQPGPSEHIERR                                      | 143 | 12 | 3  | 22.47 | b3b7y10                         | 1433.71 | 51.225  | 183542 | 2 | 717.36  | -6.98  |
| P50552 VASP_HUMAN Vasodilator-stimulated phosphoprotein | 14 |                       | ATVMLYDDGNKR                                      | 10  | 12 | 6  | 29.67 | y5°y5*y5y8°y8y9                 | 1382.67 | 41.216  | 24782  | 2 | 691.84  | 1.06   |
| P50552 VASP_HUMAN Vasodilator-stimulated phosphoprotein | 15 |                       | SGGGGLMEEMNAMLARR                                 | 257 | 17 | 3  | 16.47 | b6y11y14                        | 1779.85 | 82.360  | 5402   | 2 | 890.43  | 10.43  |
| P50552 VASP_HUMAN Vasodilator-stimulated phosphoprotein | 16 | Phosphoryl STY(5)     | VPAQSESVRRPWEK                                    | 298 | 14 | 5  | 19.46 | b3y3°y3y11°y11                  | 1748.82 | 81.665  | 34743  | 2 | 874.92  | -8.31  |

|                                                         |    |                                          |                                    |     |    |    |       |                             |         |         |       |   |         |        |
|---------------------------------------------------------|----|------------------------------------------|------------------------------------|-----|----|----|-------|-----------------------------|---------|---------|-------|---|---------|--------|
| P50552 VASP_HUMAN Vasodilator-stimulated phosphoprotein | 17 |                                          | PGPSEHIER                          | 145 | 9  | 0  | 2.38  |                             | 1021.51 | 24.945  | 3963  | 2 | 511.26  | 0.12   |
| P50552 VASP_HUMAN Vasodilator-stimulated phosphoprotein | 18 |                                          | PPPPALPTWSVPNGSPSEEVEQQKR          | 117 | 26 | 0  | 16.67 |                             | 2834.48 | 112.597 | 3696  | 3 | 945.50  | 10.51  |
| P50552 VASP_HUMAN Vasodilator-stimulated phosphoprotein | 19 |                                          | VQIYHNPTANSFR                      | 35  | 13 | 1  | 7.45  | b11                         | 1529.75 | 46.168  | 4538  | 3 | 510.59  | 4.63   |
| P50552 VASP_HUMAN Vasodilator-stimulated phosphoprotein | 20 |                                          | QQPGPSEHIER                        | 143 | 11 | 0  | 2.38  |                             | 1259.60 | 24.950  | 4088  | 3 | 420.54  | -4.26  |
| P54652 HSP72_HUMAN Heat shock-related 70 kDa protein 2  | 1  |                                          | VEIANDQGNR                         | 26  | 11 | 8  | 64.41 | b2b3b7y4y6y7y8y11           | 1228.62 | 36.891  | 58804 | 2 | 614.82  | -2.58  |
| P54652 HSP72_HUMAN Heat shock-related 70 kDa protein 2  | 2  |                                          | TTPSYVAFTDTER                      | 37  | 13 | 10 | 62.78 | b1°b1b5b9y3y6y9y11°y11y13   | 1487.71 | 55.692  | 51609 | 2 | 744.36  | 2.71   |
| P54652 HSP72_HUMAN Heat shock-related 70 kDa protein 2  | 3  |                                          | FEELNADLFR                         | 304 | 10 | 4  | 27.12 | b3b9y8y10                   | 1253.62 | 74.666  | 35560 | 2 | 627.31  | 2.24   |
| P54652 HSP72_HUMAN Heat shock-related 70 kDa protein 2  | 4  |                                          | STAGDTHLGGEDFDNR                   | 223 | 16 | 6  | 23.86 | b2°b2b8y8y9y16              | 1691.71 | 39.112  | 18711 | 3 | 564.58  | -7.14  |
| P54652 HSP72_HUMAN Heat shock-related 70 kDa protein 2  | 5  |                                          | EIAEAYLGGK                         | 129 | 10 | 3  | 27.12 | b4b8y3                      | 1050.54 | 99.581  | 5471  | 1 | 1050.54 | -4.30  |
| P54652 HSP72_HUMAN Heat shock-related 70 kDa protein 2  | 6  |                                          | MVSHLAEFVKR                        | 239 | 11 | 5  | 36.27 | b1b4°b4b7b9                 | 1346.70 | 42.606  | 2217  | 3 | 449.57  | 6.89   |
| P54652 HSP72_HUMAN Heat shock-related 70 kDa protein 2  | 7  |                                          | LLQDFFNKG                          | 351 | 9  | 5  | 30.7  | b5°b5b6y4*y4                | 1081.56 | 71.467  | 39852 | 2 | 541.28  | -9.25  |
| P54652 HSP72_HUMAN Heat shock-related 70 kDa protein 2  | 8  |                                          | MVSHLAEFVK                         | 239 | 10 | 4  | 27.12 | b3°b3y3y9                   | 1190.61 | 54.672  | 6642  | 2 | 595.81  | 16.71  |
| P54652 HSP72_HUMAN Heat shock-related 70 kDa protein 2  | 9  |                                          | TLSSSTQASIEIDSLYEGVDFYTSITR        | 275 | 27 | 8  | 36.48 | b5°b5b6°b6b7b12°b12y13      | 2983.38 | 75.610  | 6358  | 3 | 995.13  | -20.62 |
| P54652 HSP72_HUMAN Heat shock-related 70 kDa protein 2  | 10 |                                          | VHSAVITVPA YFNDSQR                 | 139 | 17 | 4  | 16.47 | b16y12*y12y15               | 1903.97 | 102.629 | 4092  | 3 | 635.33  | -0.58  |
| P54652 HSP72_HUMAN Heat shock-related 70 kDa protein 2  | 11 |                                          | FEDATVQSDMK                        | 78  | 11 | 4  | 27.52 | b5y4°y4y5                   | 1270.55 | 30.603  | 3096  | 3 | 424.19  | -8.55  |
| P54652 HSP72_HUMAN Heat shock-related 70 kDa protein 2  | 12 |                                          | FEELNADLFRGTLEPVEK                 | 304 | 18 | 4  | 22.89 | b3b5b12°b12                 | 2107.09 | 96.472  | 19584 | 2 | 1054.05 | 6.95   |
| P54652 HSP72_HUMAN Heat shock-related 70 kDa protein 2  | 13 |                                          | VQVEYKGETK                         | 103 | 10 | 8  | 52.18 | b3°b3b4°b4°b4b5b8°b8        | 1180.61 | 46.392  | 17144 | 2 | 590.81  | -7.65  |
| P54652 HSP72_HUMAN Heat shock-related 70 kDa protein 2  | 14 |                                          | FEDATVQSDMKHWPFR                   | 78  | 16 | 3  | 17.33 | b7y8y12                     | 1993.90 | 80.425  | 14307 | 3 | 665.31  | -10.71 |
| P54652 HSP72_HUMAN Heat shock-related 70 kDa protein 2  | 15 | Carbamidomethyl+C(2)                     | VCNPIISKLYQGGPGGGGGGGSGASGGPTIEEVD | 604 | 35 | 5  | 10.96 | b5y11°y11y20°y20            | 3231.50 | 83.249  | 6602  | 3 | 1077.84 | -8.31  |
| P54652 HSP72_HUMAN Heat shock-related 70 kDa protein 2  | 16 | Carbamidomethyl+C(18)                    | MSARGAIGIDLGTTYSCVGVFQHGK          | 0   | 26 | 4  | 22.9  | b7b8b13°b13                 | 2722.38 | 120.966 | 3964  | 3 | 908.13  | 11.75  |
| P54652 HSP72_HUMAN Heat shock-related 70 kDa protein 2  | 17 |                                          | QTQTFTTYSNDQSSVLVQVYEGE RAMTK      | 426 | 28 | 9  | 39.51 | b5°b5b12y9y10°y10y11°y11y22 | 3211.55 | 112.267 | 2331  | 3 | 1071.19 | 9.27   |
| P54652 HSP72_HUMAN Heat shock-related 70 kDa protein 2  | 18 |                                          | GVPQIEVTFDIDANGILNVTAAADKSTGK      | 472 | 28 | 3  | 11.78 | b3b13y4                     | 2873.45 | 113.769 | 2287  | 3 | 958.49  | -13.59 |
| P54652 HSP72_HUMAN Heat shock-related 70 kDa protein 2  | 19 |                                          | MVSHLAEFVKR                        | 239 | 11 | 4  | 24.51 | b4b10y6°y6                  | 1346.69 | 98.649  | 1753  | 1 | 1346.69 | 4.71   |
| P54652 HSP72_HUMAN Heat shock-related 70 kDa protein 2  | 20 | Carbamidomethyl+C(17)                    | SARGPAIGIDLGTTYSCVGVFQHGK          | 1   | 25 | 3  | 12.5  | b5y4y14                     | 2591.28 | 84.414  | 1521  | 2 | 1296.14 | -9.14  |
| P54652 HSP72_HUMAN Heat shock-related 70 kDa protein 2  | 21 | Phosphoryl STY(6)                        | EIAEAYLGGK                         | 129 | 10 | 3  | 28.88 | b5_H3PO4 b4b5y9             | 1130.51 | 80.503  | 15730 | 1 | 1130.51 | 9.07   |
| P54652 HSP72_HUMAN Heat shock-related 70 kDa protein 2  | 22 | Carbamidomethyl+C(14);Phosphoryl STY(10) | GPAIGIDLGTTYSCVGVFQHGK             | 4   | 22 | 3  | 13.56 | b11y10y12                   | 2357.06 | 59.278  | 2438  | 2 | 1179.03 | -13.15 |
| P54652 HSP72_HUMAN Heat shock-related 70 kDa protein 2  | 23 | Oxidation+M(1)                           | MKEIAEAYLGGK                       | 127 | 12 | 3  | 26.45 | b4y3y4                      | 1325.68 | 71.418  | 2947  | 2 | 663.35  | 5.25   |

|                                                        |    |                       |                                 |     |    |    |        |                                               |         |         |        |   |         |        |
|--------------------------------------------------------|----|-----------------------|---------------------------------|-----|----|----|--------|-----------------------------------------------|---------|---------|--------|---|---------|--------|
| P54652 HSP72_HUMAN Heat shock-related 70 kDa protein 2 | 24 |                       | AGDTHLGGEDFDNR                  | 225 | 14 | 0  | 4.37   |                                               | 1503.67 | 39.114  | 1613   | 2 | 752.34  | 14.13  |
| P60174 TPIS_HUMAN Triosephosphate isomerase            | 1  |                       | ELASQPVDVDFLVGGASLKPEFV DIINAK  | 219 | 29 | 17 | 70.14  | b2b3*b3b4*b4b5*b5b6b9b12*b12y2y3y5y10y24y29   | 3029.59 | 96.372  | 51682  | 3 | 1010.53 | 1.05   |
| P60174 TPIS_HUMAN Triosephosphate isomerase            | 2  |                       | VVLAYEPVWAIGTGK                 | 160 | 15 | 8  | 43.46  | b2b3b4y2y6y7y9y15                             | 1602.90 | 83.934  | 49593  | 2 | 801.95  | 5.56   |
| P60174 TPIS_HUMAN Triosephosphate isomerase            | 3  | Carbamidomethyl+C(12) | IYGGSVTGATCK                    | 206 | 13 | 3  | 20.83  | b6y6y11                                       | 1326.67 | 42.881  | 20319  | 2 | 663.84  | -3.96  |
| P60174 TPIS_HUMAN Triosephosphate isomerase            | 4  |                       | SNVSDAVAQSTR                    | 194 | 12 | 4  | 29.67  | y4y5y11y12                                    | 1234.61 | 33.254  | 16548  | 2 | 617.81  | 8.90   |
| P60174 TPIS_HUMAN Triosephosphate isomerase            | 5  |                       | TATPQQAQEVHEK                   | 175 | 13 | 8  | 28.31  | b2y1y2y3*y3y4y8*y8                            | 1466.71 | 20.626  | 11316  | 3 | 489.57  | -10.24 |
| P60174 TPIS_HUMAN Triosephosphate isomerase            | 6  | Carbamidomethyl+C(9)  | VPADTEVVCAPPTAYIDFAR            | 33  | 20 | 7  | 47.06  | b5b7*b7b8b12b13y4                             | 2192.08 | 69.777  | 25030  | 3 | 731.36  | 4.23   |
| P60174 TPIS_HUMAN Triosephosphate isomerase            | 7  |                       | VTNGAFTGEISPGMIK                | 69  | 16 | 3  | 17.33  | b5b14y5                                       | 1621.83 | 65.019  | 17301  | 2 | 811.42  | 4.67   |
| P60174 TPIS_HUMAN Triosephosphate isomerase            | 8  |                       | FFVGGNWK                        | 6   | 8  | 4  | 54.4   | b4b6y4y6                                      | 954.50  | 23.007  | 2128   | 2 | 477.75  | 12.98  |
| P60174 TPIS_HUMAN Triosephosphate isomerase            | 9  | Carbamidomethyl+C(24) | SNVSDAVAQSTR IYGGSVTGATCK       | 194 | 25 | 3  | 12.5   | b7b12y23                                      | 2542.25 | 66.882  | 42111  | 3 | 848.09  | -4.42  |
| P60174 TPIS_HUMAN Triosephosphate isomerase            | 10 |                       | ELASQPVDVDFLVGGASLKPEFV DIINAKQ | 219 | 30 | 5  | 36.48  | b8b13*b13b14b15                               | 3157.63 | 97.800  | 4550   | 3 | 1053.21 | -3.63  |
| P60174 TPIS_HUMAN Triosephosphate isomerase            | 11 | Carbamidomethyl+C(8)  | IAVAAQNCYKVTNGAFTGEISPGMIK      | 59  | 26 | 4  | 27.65  | y11y12y15y21                                  | 2740.40 | 136.832 | 4367   | 2 | 1370.70 | 6.24   |
| P60174 TPIS_HUMAN Triosephosphate isomerase            | 12 | Carbamidomethyl+C(18) | VTNGAFTGEISPGMIKDCGATWV VLGHSEK | 69  | 30 | 9  | 37.35  | b5b8b15*b15b26y4y12y13*y13                    | 3189.56 | 97.841  | 3974   | 5 | 638.72  | 3.06   |
| P60174 TPIS_HUMAN Triosephosphate isomerase            | 13 |                       | FFVGGNWKMNGR                    | 6   | 12 | 7  | 68.61  | b6b7*b7b8y5y6y7                               | 1412.70 | 35.742  | 3417   | 3 | 471.57  | 7.69   |
| P60174 TPIS_HUMAN Triosephosphate isomerase            | 14 | Carbamidomethyl+C(9)  | VPADTEVVCAPPTAYIDFARQK          | 33  | 22 | 3  | 13.56  | b9b11y10                                      | 2448.20 | 115.622 | 2069   | 2 | 1224.60 | -11.07 |
| P60174 TPIS_HUMAN Triosephosphate isomerase            | 15 | Phosphoryl STY(4)     | SNVSDAVAQSTR                    | 194 | 12 | 3  | 32.68  | y4y8y10                                       | 1314.55 | 80.888  | 26410  | 2 | 657.78  | -8.08  |
| P60174 TPIS_HUMAN Triosephosphate isomerase            | 16 |                       | TPQQAQEVHEK                     | 177 | 11 | 0  | 3.17   |                                               | 1294.62 | 20.639  | 2213   | 2 | 647.81  | -13.01 |
| P60174 TPIS_HUMAN Triosephosphate isomerase            | 17 |                       | PQQAQEVHEK                      | 178 | 10 | 3  | 35.3   | b3b4b5                                        | 1193.58 | 20.633  | 1718   | 2 | 597.29  | -11.76 |
| P60174 TPIS_HUMAN Triosephosphate isomerase            | 18 |                       | TATPQQAQEVHEK                   | 175 | 13 | 1  | 7.45   | y7                                            | 1448.71 | 20.623  | 2768   | 3 | 483.58  | 1.69   |
| P60660 MYL6_HUMAN Myosin light polypeptide 6           | 1  |                       | VLDFEHFLPMLQTVAK                | 63  | 16 | 19 | 182.44 | b2b3b4b6b8b10y2y3y4y5*y5y6y8y9y10y11y14y15y16 | 1887.99 | 102.650 | 263500 | 3 | 630.00  | -8.86  |
| P60660 MYL6_HUMAN Myosin light polypeptide 6           | 2  |                       | ALGQNPTNAEVLK                   | 37  | 13 | 16 | 99.09  | b1b2b3b4b5*b5b12y1y2y3y7y8y9y11*y11y13        | 1354.73 | 45.648  | 200130 | 2 | 677.87  | -0.99  |
| P60660 MYL6_HUMAN Myosin light polypeptide 6           | 3  | Carbamidomethyl+C(6)  | ILYSQCGDVMR                     | 26  | 11 | 10 | 71.4   | b2b3y2y3y6y7y8y9y11*y11                       | 1341.63 | 49.249  | 161891 | 2 | 671.32  | 2.37   |
| P60660 MYL6_HUMAN Myosin light polypeptide 6           | 4  |                       | EAFQLFDR                        | 13  | 8  | 8  | 54.4   | y1y2y3y4y5y6*y6y8                             | 1025.50 | 69.198  | 134223 | 2 | 513.25  | -6.31  |
| P60660 MYL6_HUMAN Myosin light polypeptide 6           | 5  |                       | VFDKEGNGTVMGAEIR                | 94  | 16 | 6  | 17.33  | b2b9y5*y5y7y16                                | 1722.83 | 50.329  | 106704 | 3 | 574.95  | -10.06 |
| P60660 MYL6_HUMAN Myosin light polypeptide 6           | 6  |                       | NKDQGT YEDYVEGLR                | 79  | 15 | 7  | 52.7   | y3y5y6y7y11*y11y15                            | 1786.82 | 56.771  | 84931  | 3 | 596.28  | -4.58  |
| P60660 MYL6_HUMAN Myosin light polypeptide 6           | 7  |                       | EGNGTVMGAEIR                    | 98  | 12 | 6  | 35.69  | b2y5y6y7y12*y12                               | 1233.59 | 44.097  | 23178  | 2 | 617.30  | 0.20   |
| P60660 MYL6_HUMAN Myosin light polypeptide 6           | 8  |                       | VFDK                            | 94  | 4  | 1  | 12.91  | b3                                            | 508.27  | 60.022  | 10936  | 1 | 508.27  | -6.24  |
| P60660 MYL6_HUMAN Myosin light polypeptide 6           | 9  |                       | DQGT YEDYVEGLR                  | 81  | 13 | 4  | 20.83  | b3y8y12*y12                                   | 1544.65 | 46.405  | 7613   | 3 | 515.56  | -21.65 |



|                                              |    |                                                |                                      |     |    |    |        |                                                                                                      |         |         |         |   |         |        |
|----------------------------------------------|----|------------------------------------------------|--------------------------------------|-----|----|----|--------|------------------------------------------------------------------------------------------------------|---------|---------|---------|---|---------|--------|
| P60660 MYL6_HUMAN Myosin light polypeptide 6 | 10 |                                                | VFDKEGNGTVMGAEIR                     | 94  | 16 | 3  | 23.86  | b6b7y6                                                                                               | 1722.85 | 110.339 | 42365   | 2 | 861.93  | 1.56   |
| P60660 MYL6_HUMAN Myosin light polypeptide 6 | 11 | Carbamidomethyl+C(11)                          | TGDGKILYSQCGDVMR                     | 21  | 16 | 3  | 23.86  | b9b10y4                                                                                              | 1799.85 | 67.080  | 32228   | 2 | 900.43  | 7.39   |
| P60660 MYL6_HUMAN Myosin light polypeptide 6 | 12 |                                                | EAFQLFDRTDGDK                        | 13  | 13 | 3  | 20.83  | b6b8y9                                                                                               | 1483.72 | 107.367 | 21772   | 2 | 742.36  | 1.81   |
| P60660 MYL6_HUMAN Myosin light polypeptide 6 | 13 | Carbamidomethyl+C(19)                          | MTEEEVEMLVAGHEDSNGCINYE<br>AFVRHILSG | 119 | 32 | 3  | 11.19  | b15y12y22                                                                                            | 3636.62 | 80.075  | 4325    | 3 | 1212.88 | -4.77  |
| P60660 MYL6_HUMAN Myosin light polypeptide 6 | 14 |                                                | PMLQTVAK                             | 71  | 8  | 5  | 34.73  | b3b4b5°b5*b5                                                                                         | 887.49  | 102.643 | 2996    | 2 | 444.25  | -10.38 |
| P60660 MYL6_HUMAN Myosin light polypeptide 6 | 15 |                                                | DKEGNGTVMGAEIR                       | 96  | 14 | 0  | 4.37   |                                                                                                      | 1476.71 | 50.288  | 1569    | 2 | 738.86  | 0.66   |
| P60660 MYL6_HUMAN Myosin light polypeptide 6 | 16 | Carbamidomethyl+C(6)                           | ILYSQCGDVMR                          | 26  | 11 | 0  | 2.38   |                                                                                                      | 1324.61 | 49.319  | 52923   | 2 | 662.81  | 6.82   |
| P60660 MYL6_HUMAN Myosin light polypeptide 6 | 17 |                                                | EAFQLFDR                             | 13  | 8  | 0  | 1.19   |                                                                                                      | 1007.50 | 69.189  | 11910   | 2 | 504.25  | 6.54   |
| P60709 ACTB_HUMAN Actin                      | 1  |                                                | VAPEEHPVLLTEAPLNPK                   | 95  | 18 | 27 | 232.64 | b2b6b8b9b10b12b13y2y3*y3y4y5*y5y6y7y8y9y10y11y12°y12y13y14*y14y16°y16y18                             | 1954.05 | 61.762  | 3128762 | 3 | 652.02  | -9.31  |
| P60709 ACTB_HUMAN Actin                      | 2  |                                                | SYELPDGQVITIGNER                     | 238 | 16 | 26 | 193.4  | b2b3b4°b4b8b9°b9b10b12°b12y3*y3y4*y4y5y6*y6y7y8y10*y10y11y12°y12y13y16                               | 1790.90 | 71.713  | 2411471 | 2 | 895.95  | 2.39   |
| P60709 ACTB_HUMAN Actin                      | 3  |                                                | EITALAPSTMK                          | 315 | 11 | 25 | 143.93 | b2°b2b3°b3b4°b4b5°b5b6°b6b11y2y3°y3y4°y4y5°y5y6°y6y7y8y9°y9y11                                       | 1161.62 | 51.214  | 2069748 | 2 | 581.31  | -2.94  |
| P60709 ACTB_HUMAN Actin                      | 4  |                                                | AVFPSIVGRPR                          | 28  | 11 | 14 | 114.32 | b2b3y1y2y3y4y5y6y7y8°y8y9y10y11                                                                      | 1198.70 | 56.497  | 1585024 | 2 | 599.86  | -1.32  |
| P60709 ACTB_HUMAN Actin                      | 5  |                                                | AGFAGDDAPR                           | 18  | 10 | 17 | 127.22 | b2b3b4b8y1y2y3y4°y4y5y6°y6y7°y7y8y9y10                                                               | 976.44  | 31.469  | 1341809 | 2 | 488.73  | -4.50  |
| P60709 ACTB_HUMAN Actin                      | 6  |                                                | TTGIVMDSGDGVTHTVPIYEGYA<br>LPHAILR   | 147 | 30 | 31 | 246.72 | b2°b2b3°b3b4b6°b6b7b14b18b26b30y2y3y5y6y7y8y9y10y11y12y14y16y20y23y24y25y26y28y30                    | 3183.59 | 80.614  | 1193560 | 4 | 796.65  | -7.67  |
| P60709 ACTB_HUMAN Actin                      | 7  | Carbamidomethyl+C(1);<br>Carbamidomethyl+C(16) | CPEALFQPSFLGMESCGIHETTFNS<br>IMK     | 256 | 28 | 35 | 238.92 | b3b4b5b6°b6b7°b7b8*b8b10b13b14*b14b28*b28y2y3y4y5*y5y10y12y14°y14*y14y15y16y17y18y21y22*y22y23y24y28 | 3231.47 | 93.088  | 969544  | 3 | 1077.83 | 1.89   |
| P60709 ACTB_HUMAN Actin                      | 8  |                                                | GYSFTTAAER                           | 196 | 10 | 21 | 116.93 | b2b3°b3b4°b4b5°b5b10y1y2°y2y3y4°y4y5y6°y6y7y8°y8y10                                                  | 1132.52 | 43.382  | 775135  | 2 | 566.77  | -3.13  |
| P60709 ACTB_HUMAN Actin                      | 9  |                                                | DLYANTVLSGGTTMYPGIADR                | 291 | 21 | 22 | 165.43 | b2b3b7°b7b12b14°b14b15°b15*b15y4y5y6y7y9y11y12y13y14y15y16y21                                        | 2215.09 | 77.816  | 649407  | 2 | 1108.05 | 8.05   |

|                         |    |                                                                  |                                    |     |    |    |        |                                                                                                                    |         |         |         |   |         |        |
|-------------------------|----|------------------------------------------------------------------|------------------------------------|-----|----|----|--------|--------------------------------------------------------------------------------------------------------------------|---------|---------|---------|---|---------|--------|
| P60709 ACTB_HUMAN Actin | 10 |                                                                  | DSYVGDEAQSQR                       | 50  | 12 | 37 | 199.3  | b2°b2b3°b3b4°b4b5°b5<br>b7°b7b10b11y1y2y3°y3<br>y4°y4°y4y5°y5°y5y6°y6<br>*y6y7°y7y8°y8°y8y9°y<br>9°y9y10°y10y11y12 | 1354.62 | 24.146  | 642794  | 2 | 677.82  | -0.45  |
| P60709 ACTB_HUMAN Actin | 11 |                                                                  | DLTDYLMK                           | 183 | 8  | 7  | 48.38  | b5b6°b6y2y4y5y8                                                                                                    | 998.48  | 71.144  | 456599  | 2 | 499.75  | -3.24  |
| P60709 ACTB_HUMAN Actin | 12 | Carbamidomethyl+C(2)                                             | LCYVALDFEQEMATAASSSSLEK            | 215 | 23 | 29 | 218.38 | b2b3b4b5b6b7°b7b8b9b<br>11°b11b16y1y4y5y6y7y<br>9y10°y10y11°y11y12y1<br>4y16y17°y17y23*y23                         | 2550.20 | 93.001  | 369954  | 2 | 1275.60 | 9.57   |
| P60709 ACTB_HUMAN Actin | 13 |                                                                  | QEYDESGPSIVHRK                     | 359 | 14 | 18 | 140.35 | b3°b3°b3b14y2y3y4y5y<br>6y7y8y9y10°y10y11y12<br>y14*y14                                                            | 1644.78 | 32.324  | 365178  | 3 | 548.93  | -12.02 |
| P60709 ACTB_HUMAN Actin | 14 |                                                                  | QEYDESGPSIVHR                      | 359 | 13 | 9  | 93.28  | y2y3y4y5y6y8y10°y10y<br>11                                                                                         | 1516.69 | 38.236  | 317262  | 3 | 506.24  | -7.73  |
| P60709 ACTB_HUMAN Actin | 15 |                                                                  | DSYVGDEAQSQR                       | 50  | 11 | 5  | 37.02  | b3°b3y4y7y8                                                                                                        | 1198.53 | 26.428  | 289809  | 2 | 599.77  | 2.55   |
| P60709 ACTB_HUMAN Actin | 16 |                                                                  | HQGVVMVGMGQK                       | 39  | 11 | 18 | 145.69 | b1b2°b2b3b4b5b6b10y<br>1y3*y3y4°y4y5y6y7y9y<br>11                                                                  | 1171.57 | 33.641  | 275820  | 2 | 586.29  | -2.19  |
| P60709 ACTB_HUMAN Actin | 17 |                                                                  | KDLYANTVLSGGTTMYPGIADR             | 290 | 22 | 23 | 162.43 | b6b7°b7°b7b8b9b10b12<br>b15°b15b16y1y2y5y6y7<br>y8y10y12y13°y13y14y2<br>2                                          | 2343.16 | 69.166  | 200852  | 3 | 781.72  | -3.44  |
| P60709 ACTB_HUMAN Actin | 18 |                                                                  | IIAPPERK                           | 328 | 8  | 12 | 76.23  | b2b3y2y3°y3y4°y4y5°y5<br>y6y7y8                                                                                    | 923.56  | 27.044  | 118599  | 2 | 462.28  | -5.29  |
| P60709 ACTB_HUMAN Actin | 19 | Carbamidomethyl+C(1)                                             | CDVDIRK                            | 284 | 7  | 13 | 80.61  | b1b2°b2b3b4y1y2y3y4°<br>y4y5y6y7                                                                                   | 905.44  | 22.962  | 89279   | 2 | 453.23  | -7.08  |
| P60709 ACTB_HUMAN Actin | 20 |                                                                  | IIAPPER                            | 328 | 7  | 10 | 54     | y1y3°y3y4°y4y5°y5y6°y<br>6y7                                                                                       | 795.46  | 33.740  | 77416   | 2 | 398.23  | -12.81 |
| P60709 ACTB_HUMAN Actin | 21 |                                                                  | IWHHTFYNELR                        | 84  | 11 | 6  | 24.51  | b10°b10y6°y6y8*y8                                                                                                  | 1515.76 | 56.234  | 11854   | 2 | 758.38  | 5.32   |
| P60709 ACTB_HUMAN Actin | 22 |                                                                  | YSVWIGGSILASLSTFQQMWISK            | 336 | 23 | 8  | 28.52  | b4b5°b5b7°b7y2y4y16                                                                                                | 2602.34 | 136.477 | 8144    | 3 | 868.12  | 0.84   |
| P60709 ACTB_HUMAN Actin | 23 |                                                                  | MTQIMFETFNTPAMYVAIQAVLSL<br>YASGR  | 118 | 29 | 3  | 22.01  | b12b13y11                                                                                                          | 3253.61 | 136.658 | 8051    | 3 | 1085.21 | 0.45   |
| P60709 ACTB_HUMAN Actin | 24 |                                                                  | YPIEHGIVTNWDDMEK                   | 68  | 16 | 12 | 90.74  | b3b4°b4b5°b5b6b13*b1<br>3b14y4y5y7                                                                                 | 1946.86 | 72.879  | 49336   | 3 | 649.63  | -17.68 |
| P60709 ACTB_HUMAN Actin | 25 | Carbamidomethyl+C(16)<br>;Phosphoryl STY(13)                     | DDDIAALVVDNGSGMCK                  | 1   | 17 | 3  | 16.47  | b7b12y3                                                                                                            | 1859.74 | 82.435  | 759677  | 3 | 620.58  | -4.20  |
| P60709 ACTB_HUMAN Actin | 26 | Phosphoryl STY()                                                 | YSVWIGGSILASLSTFQQMWISK            | 336 | 23 | 3  | 22.19  | b13y8y9                                                                                                            | 2682.29 | 124.306 | 11734   | 3 | 894.77  | -2.73  |
| P60709 ACTB_HUMAN Actin | 27 | Oxidation+M()                                                    | TTGIVMDSGDGVHTHTVPIEGYA<br>LPHAILR | 147 | 30 | 5  | 24.98  | b6b12b13y6y14                                                                                                      | 3199.59 | 77.442  | 72182   | 4 | 800.65  | -4.96  |
| P60709 ACTB_HUMAN Actin | 28 | Carbamidomethyl+C(1);<br>Carbamidomethyl+C(16)<br>;Oxidation+M() | CPEALFQPSFLGMESCGIHETTENS<br>IMK   | 256 | 28 | 8  | 44.48  | b13°b13b14b15y6y9y13<br>*y13                                                                                       | 3247.49 | 92.963  | 26091   | 3 | 1083.17 | 9.85   |
| P60709 ACTB_HUMAN Actin | 29 | Carbamidomethyl+C(2);<br>Oxidation+M()                           | LCYVALDFEQEMATAASSSSLEK            | 215 | 23 | 3  | 22.19  | b6y9y10                                                                                                            | 2566.14 | 79.268  | 12492   | 3 | 856.05  | -11.70 |
| P60709 ACTB_HUMAN Actin | 30 | Oxidation+M()                                                    | MTQIMFETFNTPAMYVAIQAVLSL<br>YASGR  | 118 | 29 | 4  | 22.01  | b12b13°b13y7                                                                                                       | 3269.59 | 101.144 | 3648    | 4 | 818.15  | -4.85  |
| P60709 ACTB_HUMAN Actin | 31 |                                                                  | FPSIVGRPR                          | 30  | 9  | 4  | 31.5   | b3°b3b4b7                                                                                                          | 1028.60 | 56.522  | 2283958 | 2 | 514.80  | -3.56  |
| P60709 ACTB_HUMAN Actin | 32 |                                                                  | PSIVGRPR                           | 31  | 8  | 4  | 31.5   | b3°b3b4b6                                                                                                          | 881.52  | 56.522  | 960916  | 2 | 441.26  | -12.19 |
| P60709 ACTB_HUMAN Actin | 33 |                                                                  | PEEHPVLLTEAPLNPK                   | 97  | 16 | 8  | 47.66  | b3b5b6°b6b10°b10b11°<br>b11                                                                                        | 1783.94 | 61.744  | 109317  | 3 | 595.32  | -9.79  |
| P60709 ACTB_HUMAN Actin | 34 |                                                                  | GPSIVHRK                           | 365 | 8  | 3  | 15.7   | b3°b3b6                                                                                                            | 893.53  | 32.306  | 61424   | 2 | 447.27  | -5.67  |

|                                                         |    |                       |                             |     |    |    |        |                                                                                                    |         |         |         |   |         |        |
|---------------------------------------------------------|----|-----------------------|-----------------------------|-----|----|----|--------|----------------------------------------------------------------------------------------------------|---------|---------|---------|---|---------|--------|
| P60709 ACTB_HUMAN Actin                                 | 35 |                       | GDEAQSQR                    | 54  | 8  | 2  | 21.6   | b3b4                                                                                               | 890.43  | 24.149  | 44613   | 2 | 445.72  | -4.87  |
| P60709 ACTB_HUMAN Actin                                 | 36 |                       | TALAPSTMK                   | 317 | 9  | 1  | 7.9    | b6                                                                                                 | 919.49  | 51.211  | 22241   | 1 | 919.49  | -0.46  |
| P60709 ACTB_HUMAN Actin                                 | 37 |                       | LAPSTMK                     | 319 | 7  | 1  | 7.9    | b4                                                                                                 | 747.41  | 51.276  | 14585   | 1 | 747.41  | 6.70   |
| P60709 ACTB_HUMAN Actin                                 | 38 |                       | SFTTTAER                    | 198 | 8  | 1  | 8.3    | b3                                                                                                 | 912.45  | 43.349  | 11245   | 1 | 912.45  | 3.68   |
| P60709 ACTB_HUMAN Actin                                 | 39 |                       | QEYDESGPSIVHR               | 359 | 13 | 0  | 3.17   |                                                                                                    | 1499.68 | 38.228  | 24201   | 3 | 500.56  | 2.60   |
| P60709 ACTB_HUMAN Actin                                 | 40 |                       | AGFAGDDAPR                  | 18  | 10 | 0  | 1.98   |                                                                                                    | 958.43  | 31.459  | 11297   | 2 | 479.72  | -6.24  |
| P62736 ACTA_HUMAN Actin                                 | 1  |                       | SYELPDGQVITIGNER            | 240 | 16 | 26 | 193.4  | b2b3b4°b4b8b9°b9b10b12°b12y3*y3y4*y4y5y6*y6y7y8y10*y10y11y12°y12y13y16                             | 1790.90 | 71.713  | 2411471 | 2 | 895.95  | 2.39   |
| P62736 ACTA_HUMAN Actin                                 | 2  |                       | EITALAPSTMK                 | 317 | 11 | 25 | 143.93 | b2°b2b3°b3b4°b4b5°b5b6°b6b11y2y3°y3y4°y4y5°y5y6°y6y7y8y9°y9y11                                     | 1161.62 | 51.214  | 2069748 | 2 | 581.31  | -2.94  |
| P62736 ACTA_HUMAN Actin                                 | 3  |                       | YPIEHGITTNWDDMEK            | 70  | 16 | 28 | 209.71 | b2b6b8b9b11*b11b12*b12b13b15y1y2°y2y3y4y5y6y7*y7y8*y8y12y13y14y15*y15y16*y16                       | 1960.90 | 67.180  | 1649801 | 3 | 654.30  | -6.85  |
| P62736 ACTA_HUMAN Actin                                 | 4  |                       | AVFPSIVGRPR                 | 30  | 11 | 14 | 114.32 | b2b3y1y2y3y4y5y6y7y8°y8y9y10y11                                                                    | 1198.70 | 56.497  | 1585024 | 2 | 599.86  | -1.32  |
| P62736 ACTA_HUMAN Actin                                 | 5  |                       | AGFAGDDAPR                  | 20  | 10 | 17 | 127.22 | b2b3b4b8y1y2y3y4°y4y5y6°y6y7°y7y8y9y10                                                             | 976.44  | 31.469  | 1341809 | 2 | 488.73  | -4.50  |
| P62736 ACTA_HUMAN Actin                                 | 6  |                       | DSYVGDEAQSQR                | 52  | 12 | 37 | 199.3  | b2°b2b3°b3b4°b4b5°b5b7°b7b10b11y1y2y3°y3y4°y4*y4y5°y5*y5y6°y6*y6y7*y7y8°y8*y8y9°y9*y9y10°y10y11y12 | 1354.62 | 24.146  | 642794  | 2 | 677.82  | -0.45  |
| P62736 ACTA_HUMAN Actin                                 | 7  |                       | DLTDYLMK                    | 185 | 8  | 7  | 48.38  | b5b6°b6y2y4y5y8                                                                                    | 998.48  | 71.144  | 456599  | 2 | 499.75  | -3.24  |
| P62736 ACTA_HUMAN Actin                                 | 8  |                       | DSYVGDEAQSQR                | 52  | 11 | 5  | 37.02  | b3°b3y4y7y8                                                                                        | 1198.53 | 26.428  | 289809  | 2 | 599.77  | 2.55   |
| P62736 ACTA_HUMAN Actin                                 | 9  |                       | HQGVVMVGMGQK                | 41  | 11 | 18 | 145.69 | b1b2*b2b3b4b5b6b10y1y3*y3y4*y4y5y6y7y9y11                                                          | 1171.57 | 33.641  | 275820  | 2 | 586.29  | -2.19  |
| P62736 ACTA_HUMAN Actin                                 | 10 |                       | IIAPPERK                    | 330 | 8  | 12 | 76.23  | b2b3y2y3°y3y4°y4y5°y5y6y7y8                                                                        | 923.56  | 27.044  | 118599  | 2 | 462.28  | -5.29  |
| P62736 ACTA_HUMAN Actin                                 | 11 |                       | IIAPPER                     | 330 | 7  | 10 | 54     | y1y3°y3y4°y4y5°y5y6°y6y7                                                                           | 795.46  | 33.740  | 77416   | 2 | 398.23  | -12.81 |
| P62736 ACTA_HUMAN Actin                                 | 12 |                       | YSVWIGGSILASLSTFQQMWISK     | 338 | 23 | 8  | 28.52  | b4b5°b5b7°b7y2y4y16                                                                                | 2602.34 | 136.477 | 8144    | 3 | 868.12  | 0.84   |
| P62736 ACTA_HUMAN Actin                                 | 13 |                       | GYSFVTTAER                  | 198 | 10 | 3  | 27.12  | b6y6y8                                                                                             | 1130.55 | 79.125  | 3094    | 1 | 1130.55 | -1.30  |
| P62736 ACTA_HUMAN Actin                                 | 14 |                       | EITALAPSTMK                 | 317 | 11 | 0  | 2.38   |                                                                                                    | 1143.60 | 51.214  | 69211   | 2 | 572.31  | 1.39   |
| P62937 PPIA_HUMAN Peptidyl-prolyl cis-trans isomerase A | 1  | Carbamidomethyl+C(24) | HTGPGILSMANAGPNTNGSQFFICTAK | 91  | 27 | 10 | 49.3   | b2b12°b12b13y4y8y11y15y25y27                                                                       | 2791.33 | 76.718  | 103125  | 3 | 931.11  | -0.70  |
| P62937 PPIA_HUMAN Peptidyl-prolyl cis-trans isomerase A | 2  |                       | EGMNIVEAMER                 | 133 | 11 | 3  | 36.27  | y4y6y8                                                                                             | 1278.58 | 68.895  | 37409   | 2 | 639.79  | -0.95  |
| P62937 PPIA_HUMAN Peptidyl-prolyl cis-trans isomerase A | 3  | Carbamidomethyl+C(6)  | ITIADCGQLE                  | 155 | 10 | 4  | 27.12  | b6b8y4y10                                                                                          | 1119.53 | 109.702 | 1763    | 1 | 1119.53 | -8.83  |
| P62937 PPIA_HUMAN Peptidyl-prolyl cis-trans isomerase A | 4  |                       | VNPTVFFDIAVDGEPLGR          | 1   | 18 | 4  | 15.73  | b11b14*b14y4                                                                                       | 1946.02 | 98.747  | 39980   | 2 | 973.51  | 9.28   |
| P62937 PPIA_HUMAN Peptidyl-prolyl cis-trans isomerase A | 5  |                       | VSFELFADK                   | 19  | 9  | 3  | 30.7   | b6b8y6                                                                                             | 1055.53 | 74.941  | 12603   | 2 | 528.27  | -12.84 |
| P62937 PPIA_HUMAN Peptidyl-prolyl cis-trans isomerase A | 6  |                       | MVNPTVFFDIAVDGEPLGR         | 0   | 19 | 3  | 15.08  | b3b5y7                                                                                             | 2077.04 | 60.028  | 6732    | 3 | 693.02  | -2.23  |
| P62937 PPIA_HUMAN Peptidyl-prolyl cis-trans isomerase A | 7  | Carbamidomethyl+C(7)  | IIPGFMCQGGDFTR              | 55  | 14 | 3  | 24.9   | b8y6y7                                                                                             | 1598.77 | 47.631  | 5143    | 3 | 533.60  | 15.81  |

|                                                         |    |                                      |                              |     |    |    |        |                                                                          |         |         |         |   |         |        |
|---------------------------------------------------------|----|--------------------------------------|------------------------------|-----|----|----|--------|--------------------------------------------------------------------------|---------|---------|---------|---|---------|--------|
| P62937 PPIA_HUMAN Peptidyl-prolyl cis-trans isomerase A | 8  |                                      | HVVFGK                       | 125 | 6  | 2  | 27     | b5y3                                                                     | 686.39  | 26.909  | 2325    | 2 | 343.70  | -11.12 |
| P62937 PPIA_HUMAN Peptidyl-prolyl cis-trans isomerase A | 9  |                                      | TAENFR                       | 31  | 6  | 1  | 13.7   | y4                                                                       | 737.35  | 94.614  | 1955    | 1 | 737.35  | -7.12  |
| P62937 PPIA_HUMAN Peptidyl-prolyl cis-trans isomerase A | 10 |                                      | VKEGMNIVEAMER                | 131 | 13 | 6  | 45.88  | b5b6b8b11y8°y8                                                           | 1505.75 | 59.282  | 22186   | 2 | 753.38  | 4.86   |
| P62937 PPIA_HUMAN Peptidyl-prolyl cis-trans isomerase A | 11 | Carbamidomethyl+C(8)                 | GFGYKGCSCFHR                 | 44  | 11 | 4  | 24.51  | b4b6y8°y8                                                                | 1315.59 | 57.487  | 11132   | 3 | 439.20  | -4.64  |
| P62937 PPIA_HUMAN Peptidyl-prolyl cis-trans isomerase A | 12 |                                      | ALSTGEKGFQYK                 | 37  | 12 | 8  | 36.44  | b4°b4b8°b8y7°y7y8°y8                                                     | 1257.65 | 28.213  | 3365    | 2 | 629.33  | -1.46  |
| P62937 PPIA_HUMAN Peptidyl-prolyl cis-trans isomerase A | 13 | Oxidation+M(1)                       | MVNPTVFFDIAVDGEPLGR          | 0   | 19 | 3  | 15.08  | b6b8y6                                                                   | 2093.02 | 108.785 | 79140   | 3 | 698.35  | -5.95  |
| P62937 PPIA_HUMAN Peptidyl-prolyl cis-trans isomerase A | 14 | Carbamidomethyl+C(24);Oxidation+M(9) | HTGPGILSMANAGPNTNGSQFFICTAK  | 91  | 27 | 6  | 27.18  | b5b9b10b13*b13y6                                                         | 2807.30 | 64.629  | 10348   | 3 | 936.44  | -8.26  |
| P63104 I433Z_HUMAN 14-3-3 protein zeta/delta            | 1  |                                      | FLIPNASQAESK                 | 103 | 12 | 12 | 79.36  | b2b3b6y2y4y6y7y9°y9*y9y10y12                                             | 1304.69 | 55.923  | 112759  | 2 | 652.85  | 1.03   |
| P63104 I433Z_HUMAN 14-3-3 protein zeta/delta            | 2  |                                      | SVTEQGAELSNEER               | 27  | 14 | 24 | 142.41 | b5°b5b6°b6°b6b8°b8b10y2y4y5°y5y7°y7y8y9°y9y10*y10y11*y11y12*y12y14       | 1548.72 | 35.426  | 110399  | 2 | 774.86  | 4.18   |
| P63104 I433Z_HUMAN 14-3-3 protein zeta/delta            | 3  |                                      | GIVDQSQAYQEAFFEISKK          | 139 | 19 | 6  | 31.82  | b2y3y4y12y16y19                                                          | 2169.07 | 68.717  | 88481   | 3 | 723.70  | -5.29  |
| P63104 I433Z_HUMAN 14-3-3 protein zeta/delta            | 4  |                                      | TAFDEAIAELDTLSEESYKDSLIMQLLR | 193 | 29 | 12 | 77.26  | b2b3b5b6°b6y3y4y5y6y7y14y29                                              | 3302.61 | 136.663 | 71885   | 4 | 826.41  | -8.35  |
| P63104 I433Z_HUMAN 14-3-3 protein zeta/delta            | 5  |                                      | YLAEVAAGDDKK                 | 127 | 12 | 5  | 45.19  | y3y7y8y10y12                                                             | 1279.64 | 33.469  | 59384   | 3 | 427.22  | -11.54 |
| P63104 I433Z_HUMAN 14-3-3 protein zeta/delta            | 6  | Carbamidomethyl+C(7)                 | YDDMAACMK                    | 18  | 9  | 8  | 62.08  | b1b2b3y3y4y5y8y9                                                         | 1104.42 | 39.678  | 44583   | 2 | 552.72  | 6.30   |
| P63104 I433Z_HUMAN 14-3-3 protein zeta/delta            | 7  |                                      | TAFDEAIAELDTLSEESYK          | 193 | 19 | 9  | 39.5   | b2b3b16y1y9y11y12°y12y18                                                 | 2132.01 | 102.285 | 23979   | 2 | 1066.51 | 9.96   |
| P63104 I433Z_HUMAN 14-3-3 protein zeta/delta            | 8  | Carbamidomethyl+C(3)                 | DICNDVLSLEK                  | 91  | 12 | 5  | 22.47  | b7*b7y5y10*y10                                                           | 1418.73 | 99.521  | 130752  | 2 | 709.87  | 3.96   |
| P63104 I433Z_HUMAN 14-3-3 protein zeta/delta            | 9  |                                      | YLAEVAAGDDK                  | 127 | 11 | 3  | 24.51  | b8y4y7                                                                   | 1151.55 | 39.935  | 4250    | 2 | 576.28  | -8.27  |
| P63104 I433Z_HUMAN 14-3-3 protein zeta/delta            | 10 |                                      | GDYYRYLAEVAAGDDK             | 122 | 16 | 3  | 25.7   | b7b12b13                                                                 | 1805.86 | 69.600  | 4848    | 2 | 903.43  | 14.06  |
| P63104 I433Z_HUMAN 14-3-3 protein zeta/delta            | 11 |                                      | VVSSIEQKTEGAEK               | 60  | 14 | 3  | 24.9   | b13y11y12                                                                | 1504.79 | 84.451  | 2087    | 3 | 502.27  | 1.14   |
| P63104 I433Z_HUMAN 14-3-3 protein zeta/delta            | 12 |                                      | AFDEAIAELDTLSEESYK           | 194 | 18 | 3  | 24.26  | b7b10b11                                                                 | 2030.93 | 102.204 | 3883    | 3 | 677.65  | -4.75  |
| P63104 I433Z_HUMAN 14-3-3 protein zeta/delta            | 13 |                                      | TAFDEAIAELDTLSEE             | 193 | 16 | 0  | 9.52   |                                                                          | 1753.82 | 136.735 | 2438    | 1 | 1753.82 | 9.54   |
| P63261 ACTG_HUMAN Actin                                 | 1  |                                      | VAPEEHPVLLTEAPLNPK           | 95  | 18 | 27 | 232.64 | b2b6b8b9b10b12b13y2y3*y3y4y5*y5y6y7y8y9y10y11y12°y12y13y14*y14y16°y16y18 | 1954.05 | 61.762  | 3128762 | 3 | 652.02  | -9.31  |
| P63261 ACTG_HUMAN Actin                                 | 2  |                                      | SYELPDGQVITIGNER             | 238 | 16 | 26 | 193.4  | b2b3b4°b4b8b9°b9b10b12°b12y3*y3y4*y4y5y6*y6y7y8y10*y10y11y12°y12y13y16   | 1790.90 | 71.713  | 2411471 | 2 | 895.95  | 2.39   |
| P63261 ACTG_HUMAN Actin                                 | 3  |                                      | EITALAPSTMK                  | 315 | 11 | 25 | 143.93 | b2°b2b3°b3b4°b4b5°b5b6°b6b11y2y3°y3y4°y4y5°y5y6°y6y7y8y9°y9y11           | 1161.62 | 51.214  | 2069748 | 2 | 581.31  | -2.94  |

|                         |    |                                             |                                 |     |    |    |        |                                                                                               |         |        |         |   |         |        |
|-------------------------|----|---------------------------------------------|---------------------------------|-----|----|----|--------|-----------------------------------------------------------------------------------------------|---------|--------|---------|---|---------|--------|
| P63261 ACTG_HUMAN Actin | 4  |                                             | AVFPSIVGRPR                     | 28  | 11 | 14 | 114.32 | b2b3y1y2y3y4y5y6y7y8y8y9y10y11                                                                | 1198.70 | 56.497 | 1585024 | 2 | 599.86  | -1.32  |
| P63261 ACTG_HUMAN Actin | 5  |                                             | AGFAGDDAPR                      | 18  | 10 | 17 | 127.22 | b2b3b4b8y1y2y3y4y4y5y6y6y7y7y8y9y10                                                           | 976.44  | 31.469 | 1341809 | 2 | 488.73  | -4.50  |
| P63261 ACTG_HUMAN Actin | 6  |                                             | TTGIVMDSGDGVHTHTVPIYEGYALPHAILR | 147 | 30 | 31 | 246.72 | b2b2b3b3b4b6b6b7b14b18b26b30y2y3y5y6y7y8y9y10y11y12y14y16y20y23y24y25y26y28y30                | 3183.59 | 80.614 | 1193560 | 4 | 796.65  | -7.67  |
| P63261 ACTG_HUMAN Actin | 7  | Carbamidomethyl+C(1); Carbamidomethyl+C(16) | CPEALFQPSFLGMESCGIHETTFNSIMK    | 256 | 28 | 35 | 238.92 | b3b4b5b6b6b7b7b8b8b10b13b14b14b28b28y2y3y4y5y5y10y12y14y14*y14y15y16y17y18y21y22*y22y23y24y28 | 3231.47 | 93.088 | 969544  | 3 | 1077.83 | 1.89   |
| P63261 ACTG_HUMAN Actin | 8  |                                             | GYSFTTAAER                      | 196 | 10 | 21 | 116.93 | b2b3b3b4b4b5b5b10y1y2y2y3y4y4y5y6y6y7y8y8y10                                                  | 1132.52 | 43.382 | 775135  | 2 | 566.77  | -3.13  |
| P63261 ACTG_HUMAN Actin | 9  |                                             | DLYANTVLSGGTTMYPGIADR           | 291 | 21 | 22 | 165.43 | b2b3b7b7b12b14b14b15b15*b15y4y5y6y7y9y11y12y13y14y15y16y21                                    | 2215.09 | 77.816 | 649407  | 2 | 1108.05 | 8.05   |
| P63261 ACTG_HUMAN Actin | 10 |                                             | DSYVGDEAQSQR                    | 50  | 12 | 37 | 199.3  | b2b2b3b3b4b4b5b5b7b7b10b11y1y2y3y3y4y4*y4y5y5*y5y6y6*y6y7*y7y8*y8*y8y9y9*y9y10y10y11y12       | 1354.62 | 24.146 | 642794  | 2 | 677.82  | -0.45  |
| P63261 ACTG_HUMAN Actin | 11 |                                             | DLTDYLMK                        | 183 | 8  | 7  | 48.38  | b5b6b6y2y4y5y8                                                                                | 998.48  | 71.144 | 456599  | 2 | 499.75  | -3.24  |
| P63261 ACTG_HUMAN Actin | 12 | Carbamidomethyl+C(2)                        | LCYVALDFEQEMATAASSSSLEK         | 215 | 23 | 29 | 218.38 | b2b3b4b5b6b7b7b8b9b11b11b16y1y4y5y6y7y9y10y10y11y11y12y14y16y17y17y23*y23                     | 2550.20 | 93.001 | 369954  | 2 | 1275.60 | 9.57   |
| P63261 ACTG_HUMAN Actin | 13 |                                             | QEYDESGPSIVHRK                  | 359 | 14 | 18 | 140.35 | b3b3*b3b14y2y3y4y5y6y7y8y9y10y10y11y12y14*y14                                                 | 1644.78 | 32.324 | 365178  | 3 | 548.93  | -12.02 |
| P63261 ACTG_HUMAN Actin | 14 |                                             | QEYDESGPSIVHR                   | 359 | 13 | 9  | 93.28  | y2y3y4y5y6y8y10y10y11                                                                         | 1516.69 | 38.236 | 317262  | 3 | 506.24  | -7.73  |
| P63261 ACTG_HUMAN Actin | 15 |                                             | DSYVGDEAQSQR                    | 50  | 11 | 5  | 37.02  | b3b3y4y7y8                                                                                    | 1198.53 | 26.428 | 289809  | 2 | 599.77  | 2.55   |
| P63261 ACTG_HUMAN Actin | 16 |                                             | HQGVMVGMGQK                     | 39  | 11 | 18 | 145.69 | b1b2b2b3b4b5b6b10y1y3*y3y4*y4y5y6y7y9y11                                                      | 1171.57 | 33.641 | 275820  | 2 | 586.29  | -2.19  |
| P63261 ACTG_HUMAN Actin | 17 |                                             | KDLYANTVLSGGTTMYPGIADR          | 290 | 22 | 23 | 162.43 | b6b7b7b7b8b9b10b12b15*b15b16y1y2y5y6y7y8y10y12y13y13y14y22                                    | 2343.16 | 69.166 | 200852  | 3 | 781.72  | -3.44  |
| P63261 ACTG_HUMAN Actin | 18 |                                             | IIAPPERK                        | 328 | 8  | 12 | 76.23  | b2b3y2y3y3y4y4y5y5y6y7y8                                                                      | 923.56  | 27.044 | 118599  | 2 | 462.28  | -5.29  |
| P63261 ACTG_HUMAN Actin | 19 | Carbamidomethyl+C(1)                        | CDVDIRK                         | 284 | 7  | 13 | 80.61  | b1b2b2b3b4y1y2y3y4y4y5y6y7                                                                    | 905.44  | 22.962 | 89279   | 2 | 453.23  | -7.08  |
| P63261 ACTG_HUMAN Actin | 20 |                                             | IIAPPER                         | 328 | 7  | 10 | 54     | y1y3y3y4y4y5y5y6y6y7                                                                          | 795.46  | 33.740 | 77416   | 2 | 398.23  | -12.81 |
| P63261 ACTG_HUMAN Actin | 21 |                                             | IWHHTFYNELR                     | 84  | 11 | 6  | 24.51  | b10*b10y6y6y8*y8                                                                              | 1515.76 | 56.234 | 11854   | 2 | 758.38  | 5.32   |

|                         |    |                                                |                                    |     |    |    |        |                                                                                                      |         |         |         |   |         |        |
|-------------------------|----|------------------------------------------------|------------------------------------|-----|----|----|--------|------------------------------------------------------------------------------------------------------|---------|---------|---------|---|---------|--------|
| P63261 ACTG_HUMAN Actin | 22 |                                                | YSVWIGGSILASLSTFQQMWISK            | 336 | 23 | 8  | 28.52  | b4b5°b5b7°b7y2y4y16                                                                                  | 2602.34 | 136.477 | 8144    | 3 | 868.12  | 0.84   |
| P63261 ACTG_HUMAN Actin | 23 |                                                | MTQIMFETFNTPAMYVAIQAVLSL<br>YASGR  | 118 | 29 | 3  | 22.01  | b12b13y11                                                                                            | 3253.61 | 136.658 | 8051    | 3 | 1085.21 | 0.45   |
| P63261 ACTG_HUMAN Actin | 24 | Carbamidomethyl+C(16)                          | EEEEIALVIDNGSGMCK                  | 1   | 17 | 4  | 23.88  | b4b6b11b17                                                                                           | 1835.84 | 67.184  | 3035    | 3 | 612.62  | -3.86  |
| P63261 ACTG_HUMAN Actin | 25 |                                                | GILTLK                             | 62  | 6  | 9  | 66.91  | b3b4°b4b5°b5y3°y3y4°y<br>4                                                                           | 644.44  | 53.604  | 350082  | 1 | 644.44  | 3.22   |
| P63261 ACTG_HUMAN Actin | 26 | Carbamidomethyl+C(17)                          | MEEEIAALVIDNGSGMCK                 | 0   | 18 | 4  | 15.73  | b3b11°b11y9                                                                                          | 1966.85 | 52.720  | 135535  | 3 | 656.29  | -21.35 |
| P63261 ACTG_HUMAN Actin | 27 | Carbamidomethyl+C(3);<br>Carbamidomethyl+C(18) | FRCPEALFQPSFLGMESCGIHETTF<br>NSIMK | 254 | 30 | 31 | 269.34 | b3b5b6b7b8b9b11b12°b<br>12b14b21y3y4y5y7y8*y<br>8y9°y9y10y13y14y15y1<br>6y17y18y19y21°y21y22<br>*y22 | 3534.63 | 91.109  | 1465730 | 4 | 884.41  | -1.52  |
| P63261 ACTG_HUMAN Actin | 28 |                                                | DLYANTVLSGGTTMYPGIADRMQ<br>K       | 291 | 24 | 7  | 29.01  | b11°b11y5y11y12*y12y<br>14                                                                           | 2602.30 | 71.193  | 27445   | 4 | 651.33  | 13.51  |
| P63261 ACTG_HUMAN Actin | 29 | Carbamidomethyl+C(16)                          | EEEEIALVIDNGSGMCKAGFAGD<br>DAPR    | 1   | 27 | 5  | 26.22  | b4b5b17y13y16                                                                                        | 2793.31 | 80.513  | 4282    | 2 | 1397.16 | 10.58  |
| P63261 ACTG_HUMAN Actin | 30 |                                                | KDLYANTVLSGGTTMYPGIADR             | 290 | 22 | 3  | 13.56  | b13y11y20                                                                                            | 2343.16 | 71.390  | 2895    | 2 | 1172.08 | -3.23  |
| P63261 ACTG_HUMAN Actin | 31 | Phosphoryl STY()                               | KDLYANTVLSGGTTMYPGIADR             | 290 | 22 | 4  | 24.43  | b13y9y10_HPO3<br>y10y17                                                                              | 2423.11 | 136.875 | 2533    | 2 | 1212.06 | -6.65  |
| P63261 ACTG_HUMAN Actin | 32 | Carbamidomethyl+C(16)<br>;Oxidation+M(15)      | EEEEIALVIDNGSGMCK                  | 1   | 17 | 5  | 23.88  | b7°b7b12b15°b15                                                                                      | 1851.82 | 61.422  | 3849    | 2 | 926.41  | -13.38 |
| P63261 ACTG_HUMAN Actin | 33 |                                                | VFPSIVGRPR                         | 29  | 10 | 0  | 2.38   |                                                                                                      | 1127.67 | 56.531  | 135001  | 2 | 564.34  | 0.87   |
| P63261 ACTG_HUMAN Actin | 34 |                                                | YVGDEAQSQR                         | 52  | 10 | 2  | 17.62  | b4b8                                                                                                 | 1152.56 | 24.123  | 87235   | 2 | 576.79  | 0.11   |
| P63261 ACTG_HUMAN Actin | 35 |                                                | VGDEAQSQR                          | 53  | 9  | 5  | 45.19  | b3b4b5b8°b8                                                                                          | 989.50  | 24.127  | 80204   | 2 | 495.26  | 2.10   |
| P63261 ACTG_HUMAN Actin | 36 |                                                | SGPSIVHRK                          | 364 | 9  | 2  | 7.33   | b3°b3                                                                                                | 980.56  | 32.332  | 51841   | 2 | 490.78  | -4.11  |
| P63261 ACTG_HUMAN Actin | 37 |                                                | AGDDAPR                            | 21  | 7  | 3  | 37.12  | b3b4b5                                                                                               | 701.32  | 31.492  | 49643   | 1 | 701.32  | 4.26   |
| P63261 ACTG_HUMAN Actin | 38 |                                                | IAPPERK                            | 329 | 7  | 0  | 1.19   |                                                                                                      | 810.48  | 27.040  | 33184   | 2 | 405.74  | -6.18  |
| P63261 ACTG_HUMAN Actin | 39 |                                                | PSIVHRK                            | 366 | 7  | 2  | 7.33   | b3°b3                                                                                                | 836.50  | 32.328  | 30624   | 2 | 418.76  | -7.52  |
| P63261 ACTG_HUMAN Actin | 40 |                                                | QIMFETFNTPAMYVAIQAVLSLYA<br>SGR    | 120 | 27 | 0  | 9.52   |                                                                                                      | 3021.53 | 136.709 | 29606   | 4 | 756.14  | 4.52   |
| P63261 ACTG_HUMAN Actin | 41 |                                                | FAGDDAPR                           | 20  | 8  | 2  | 8.3    | b5°b5                                                                                                | 848.39  | 31.493  | 26256   | 2 | 424.70  | -4.24  |
| P63261 ACTG_HUMAN Actin | 42 |                                                | SIVGRPR                            | 32  | 7  | 3  | 31.5   | b3b5b6                                                                                               | 784.47  | 56.518  | 25221   | 2 | 392.74  | -10.58 |
| P63261 ACTG_HUMAN Actin | 43 |                                                | SYVGDEAQSQR                        | 51  | 11 | 1  | 7.63   | b8                                                                                                   | 1239.59 | 24.128  | 9821    | 2 | 620.30  | -7.09  |
| P63261 ACTG_HUMAN Actin | 44 |                                                | GFAGDDAPR                          | 19  | 9  | 1  | 8.3    | b4                                                                                                   | 905.41  | 31.482  | 3967    | 1 | 905.41  | -3.84  |
| P63261 ACTG_HUMAN Actin | 45 |                                                | DEAQSQR                            | 55  | 7  | 5  | 35.69  | b3°b3b4b5°b5                                                                                         | 833.41  | 24.142  | 2217    | 2 | 417.21  | 0.59   |
| P63261 ACTG_HUMAN Actin | 46 |                                                | GYSFTTAER                          | 196 | 10 | 0  | 1.98   |                                                                                                      | 1114.52 | 43.428  | 20643   | 2 | 557.76  | 9.42   |
| P63267 ACTH_HUMAN Actin | 1  |                                                | SYELPDGQVITIGNER                   | 239 | 16 | 26 | 193.4  | b2b3b4°b4b8b9°b9b10b<br>12°b12y3°y3y4°y4y5y6<br>*y6y7y8y10*y10y11y12<br>°y12y13y16                   | 1790.90 | 71.713  | 2411471 | 2 | 895.95  | 2.39   |
| P63267 ACTH_HUMAN Actin | 2  |                                                | EITALAPSTMK                        | 316 | 11 | 25 | 143.93 | b2°b2b3°b3b4°b4b5°b5<br>b6°b6b11y2y3°y3y4°y4y<br>5°y5y6°y6y7y8y9°y9y11                               | 1161.62 | 51.214  | 2069748 | 2 | 581.31  | -2.94  |
| P63267 ACTH_HUMAN Actin | 3  |                                                | YPIEHGIITNWDMEK                    | 69  | 16 | 28 | 209.71 | b2b6b8b9b11°b11b12°<br>b12b13b15y1y2y2y3y4<br>y5y6y7*y7y8*y8y12y13<br>y14y15*y15y16*y16              | 1960.90 | 67.180  | 1649801 | 3 | 654.30  | -6.85  |
| P63267 ACTH_HUMAN Actin | 4  |                                                | AVFPSIVGRPR                        | 29  | 11 | 14 | 114.32 | b2b3y1y2y3y4y5y6y7y8<br>°y8y9y10y11                                                                  | 1198.70 | 56.497  | 1585024 | 2 | 599.86  | -1.32  |

|                                             |    |                                     |                         |     |    |    |        |                                                                                                    |         |         |         |   |         |        |
|---------------------------------------------|----|-------------------------------------|-------------------------|-----|----|----|--------|----------------------------------------------------------------------------------------------------|---------|---------|---------|---|---------|--------|
| P63267 ACTH_HUMAN Actin                     | 5  |                                     | AGFAGDDAPR              | 19  | 10 | 17 | 127.22 | b2b3b4b8y1y2y3y4°y4y5y6°y6y7°y7y8y9y10                                                             | 976.44  | 31.469  | 1341809 | 2 | 488.73  | -4.50  |
| P63267 ACTH_HUMAN Actin                     | 6  |                                     | DSYVGDEAQSQR            | 51  | 12 | 37 | 199.3  | b2°b2b3°b3b4°b4b5°b5b7°b7b10b11y1y2y3°y3y4°y4*y4y5°y5*y5y6°y6*y6y7*y7y8*y8*y8y9°y9*y9y10°y10y11y12 | 1354.62 | 24.146  | 642794  | 2 | 677.82  | -0.45  |
| P63267 ACTH_HUMAN Actin                     | 7  |                                     | DLTDYLMK                | 184 | 8  | 7  | 48.38  | b5b6°b6y2y4y5y8                                                                                    | 998.48  | 71.144  | 456599  | 2 | 499.75  | -3.24  |
| P63267 ACTH_HUMAN Actin                     | 8  |                                     | DSYVGDEAQSQR            | 51  | 11 | 5  | 37.02  | b3°b3y4y7y8                                                                                        | 1198.53 | 26.428  | 289809  | 2 | 599.77  | 2.55   |
| P63267 ACTH_HUMAN Actin                     | 9  |                                     | HQGVVMVGMGQK            | 40  | 11 | 18 | 145.69 | b1b2*b2b3b4b5b6b10y1y3*y3y4*y4y5y6y7y9y11                                                          | 1171.57 | 33.641  | 275820  | 2 | 586.29  | -2.19  |
| P63267 ACTH_HUMAN Actin                     | 10 |                                     | IIAPPERK                | 329 | 8  | 12 | 76.23  | b2b3y2y3°y3y4°y4y5°y5y6y7y8                                                                        | 923.56  | 27.044  | 118599  | 2 | 462.28  | -5.29  |
| P63267 ACTH_HUMAN Actin                     | 11 |                                     | IIAPPER                 | 329 | 7  | 10 | 54     | y1y3°y3y4°y4y5°y5y6°y6y7                                                                           | 795.46  | 33.740  | 77416   | 2 | 398.23  | -12.81 |
| P63267 ACTH_HUMAN Actin                     | 12 |                                     | GYSFVTTAER              | 197 | 10 | 3  | 27.12  | b6y6y8                                                                                             | 1130.55 | 79.125  | 3094    | 1 | 1130.55 | -1.30  |
| P63267 ACTH_HUMAN Actin                     | 13 |                                     | DLYANNVLSGGTTMYPGIADR   | 292 | 21 | 7  | 31.48  | b9°b9y4y7°y7y12y13                                                                                 | 2228.05 | 108.625 | 3568    | 3 | 743.35  | -6.68  |
| P63267 ACTH_HUMAN Actin                     | 14 | Phosphoryl+STY()                    | KDLYANNVLSGGTTMYPGIADR  | 291 | 22 | 3  | 20.07  | y5y12y14                                                                                           | 2436.10 | 63.840  | 9043    | 3 | 812.70  | -7.32  |
| P63267 ACTH_HUMAN Actin                     | 15 | Carbamidomethyl+C(2); Oxidation+M() | LCYVALDFENEMATAASSSSLEK | 216 | 23 | 8  | 35.67  | b4b5b7°b7y5°y5y7y11                                                                                | 2552.16 | 100.399 | 24560   | 4 | 638.80  | 4.11   |
| P63267 ACTH_HUMAN Actin                     | 16 | Oxidation+M()                       | KDLYANNVLSGGTTMYPGIADR  | 291 | 22 | 3  | 13.56  | b13y9y12                                                                                           | 2372.13 | 86.042  | 16372   | 3 | 791.38  | -9.47  |
| P67936 TPM4_HUMAN Tropomyosin alpha-4 chain | 1  |                                     | IQLVEEELDR              | 55  | 10 | 19 | 127.22 | b2*b2b3b4b7y1y2y3y4y5°y5y6y7°y7y8y9°y9*y9y10                                                       | 1243.66 | 59.697  | 442286  | 2 | 622.33  | 1.77   |
| P67936 TPM4_HUMAN Tropomyosin alpha-4 chain | 2  |                                     | IQALQQQADEAEDR          | 13  | 14 | 25 | 164.74 | b2*b2b3*b3b4b12b13y1y2y3y4y5°y5y6y8*y8y9*y9y10°y10*y10y11*y11y12y14                                | 1614.78 | 40.177  | 224373  | 2 | 807.89  | 2.49   |
| P67936 TPM4_HUMAN Tropomyosin alpha-4 chain | 3  |                                     | TIDDLEEK                | 215 | 8  | 12 | 81     | b4°b4b7°b7y1y2y3y4y5y6°y6y8                                                                        | 962.46  | 35.365  | 205286  | 2 | 481.74  | -4.57  |
| P67936 TPM4_HUMAN Tropomyosin alpha-4 chain | 4  |                                     | AEGDVAALNRR             | 44  | 11 | 7  | 24.51  | b2b5°b5y7y9*y9y11                                                                                  | 1171.62 | 30.416  | 88443   | 2 | 586.31  | -1.15  |
| P67936 TPM4_HUMAN Tropomyosin alpha-4 chain | 5  |                                     | AEGDVAALNR              | 44  | 10 | 7  | 52.93  | b2b7b9y5y6y8y10                                                                                    | 1015.51 | 33.664  | 41296   | 2 | 508.26  | -4.33  |
| P67936 TPM4_HUMAN Tropomyosin alpha-4 chain | 6  |                                     | LATALQK                 | 69  | 7  | 8  | 64.29  | b4°b4y3y4y5y6°y6y7                                                                                 | 744.45  | 28.993  | 31476   | 2 | 372.73  | -13.77 |
| P67936 TPM4_HUMAN Tropomyosin alpha-4 chain | 7  |                                     | HIAEEADRK               | 116 | 9  | 11 | 89.93  | b2b3b5y2y3y4y6°y6y7y8y9                                                                            | 1068.53 | 22.362  | 4032    | 3 | 356.85  | -10.74 |
| P67936 TPM4_HUMAN Tropomyosin alpha-4 chain | 8  |                                     | AGLNSLEAVK              | 1   | 10 | 3  | 27.12  | b5y5y7                                                                                             | 1001.57 | 50.746  | 21252   | 2 | 501.29  | 5.42   |
| P67936 TPM4_HUMAN Tropomyosin alpha-4 chain | 9  |                                     | VIENR                   | 92  | 5  | 1  | 13.3   | b4                                                                                                 | 630.36  | 28.120  | 14618   | 1 | 630.36  | 3.78   |
| P67936 TPM4_HUMAN Tropomyosin alpha-4 chain | 10 |                                     | ELDGER                  | 33  | 6  | 2  | 13.7   | y5°y5                                                                                              | 718.35  | 108.797 | 2803    | 1 | 718.35  | 12.24  |
| P67936 TPM4_HUMAN Tropomyosin alpha-4 chain | 11 | Carbamidomethyl+C(19)               | EENVGLHQTLDTLNELNCI     | 228 | 20 | 5  | 14.51  | b12°b12y5y7*y7                                                                                     | 2340.16 | 124.286 | 1957    | 2 | 1170.59 | 21.07  |
| P67936 TPM4_HUMAN Tropomyosin alpha-4 chain | 12 |                                     | NVTNNLKSLEAASEK         | 162 | 15 | 4  | 18.31  | b3*b3b5y12                                                                                         | 1617.86 | 90.248  | 184409  | 2 | 809.43  | 8.60   |
| P67936 TPM4_HUMAN Tropomyosin alpha-4 chain | 13 |                                     | KLVILEGELER             | 131 | 11 | 7  | 65.38  | b3b4b5y5y6°y6y9                                                                                    | 1298.77 | 62.609  | 100068  | 2 | 649.89  | 0.85   |
| P67936 TPM4_HUMAN Tropomyosin alpha-4 chain | 14 | Carbamidomethyl+C(1)                | CGDLEELKNVTNNLK         | 153 | 16 | 4  | 25.7   | b3b14°b14b15                                                                                       | 1875.90 | 77.538  | 82238   | 3 | 625.97  | -7.35  |

|                                             |    |                      |                         |     |    |    |        |                                                                                                    |         |         |         |   |         |        |
|---------------------------------------------|----|----------------------|-------------------------|-----|----|----|--------|----------------------------------------------------------------------------------------------------|---------|---------|---------|---|---------|--------|
| P67936 TPM4_HUMAN Tropomyosin alpha-4 chain | 15 |                      | KIQALQQADEAEDR          | 12  | 15 | 10 | 113.77 | b3b4b5b8y4y5y6y7y8y9                                                                               | 1742.85 | 37.432  | 63062   | 3 | 581.62  | -7.49  |
| P67936 TPM4_HUMAN Tropomyosin alpha-4 chain | 16 |                      | HIAEEADRK               | 116 | 9  | 4  | 45.77  | b3y4y5y7                                                                                           | 1068.53 | 13.826  | 13181   | 3 | 356.85  | -14.28 |
| P67936 TPM4_HUMAN Tropomyosin alpha-4 chain | 17 | Carbamidomethyl+C(8) | AEVSELKCGDLEELK         | 146 | 16 | 8  | 55.39  | b4°b4b6°b6b8y8y9y10                                                                                | 1848.89 | 72.841  | 8199    | 3 | 616.97  | -1.12  |
| P67936 TPM4_HUMAN Tropomyosin alpha-4 chain | 18 |                      | EKAEGDV AALNR           | 42  | 12 | 6  | 44.52  | b3b8y3y4y9°y9                                                                                      | 1272.65 | 31.190  | 6817    | 2 | 636.83  | -5.95  |
| P67936 TPM4_HUMAN Tropomyosin alpha-4 chain | 19 |                      | AEERA EVSELK            | 142 | 11 | 4  | 27.52  | b4b5y10°y10                                                                                        | 1260.63 | 136.236 | 3933    | 1 | 1260.63 | -11.52 |
| P67936 TPM4_HUMAN Tropomyosin alpha-4 chain | 20 |                      | EAETRAEFAER             | 197 | 11 | 3  | 36.27  | y3y5y9                                                                                             | 1308.62 | 32.254  | 3441    | 2 | 654.81  | 2.71   |
| P67936 TPM4_HUMAN Tropomyosin alpha-4 chain | 21 | Phosphoryl STY(5)    | AGLNSLEAVK              | 1   | 10 | 4  | 39.63  | b6b9y4y7_H3PO4 y7                                                                                  | 1081.52 | 32.118  | 3083    | 2 | 541.26  | -1.02  |
| P67936 TPM4_HUMAN Tropomyosin alpha-4 chain | 22 |                      | GDVAALNRR               | 46  | 9  | 3  | 36.27  | b3b4b5                                                                                             | 971.54  | 30.416  | 45673   | 2 | 486.27  | -3.20  |
| P67936 TPM4_HUMAN Tropomyosin alpha-4 chain | 23 |                      | EGDVAALNRR              | 45  | 10 | 0  | 2.38   |                                                                                                    | 1100.58 | 30.408  | 18543   | 2 | 550.79  | -5.21  |
| P67936 TPM4_HUMAN Tropomyosin alpha-4 chain | 24 |                      | AEGDVAALNRR             | 44  | 11 | 0  | 2.38   |                                                                                                    | 1153.60 | 30.479  | 3255    | 3 | 385.21  | -1.90  |
| P68032 ACTC_HUMAN Actin                     | 1  |                      | SYELPDGQVITIGNER        | 240 | 16 | 26 | 193.4  | b2b3b4°b4b8b9°b9b10b12°b12y3°y3y4°y4y5y6°y6y7y8y10°y10y11y12°y12y13y16                             | 1790.90 | 71.713  | 2411471 | 2 | 895.95  | 2.39   |
| P68032 ACTC_HUMAN Actin                     | 2  |                      | EITALAPSTMK             | 317 | 11 | 25 | 143.93 | b2°b2b3°b3b4°b4b5°b5b6°b6b11y2y3°y3y4°y4y5°y5y6°y6y7y8y9°y9y11                                     | 1161.62 | 51.214  | 2069748 | 2 | 581.31  | -2.94  |
| P68032 ACTC_HUMAN Actin                     | 3  |                      | YPIEHGIITNWDDMEK        | 70  | 16 | 28 | 209.71 | b2b6b8b9b11°b11b12°b12b13b15y1y2°y2y3y4y5y6y7°y7y8°y8y12y13y14y15°y15y16°y16                       | 1960.90 | 67.180  | 1649801 | 3 | 654.30  | -6.85  |
| P68032 ACTC_HUMAN Actin                     | 4  |                      | AVFPSIVGRPR             | 30  | 11 | 14 | 114.32 | b2b3y1y2y3y4y5y6y7y8°y8y9y10y11                                                                    | 1198.70 | 56.497  | 1585024 | 2 | 599.86  | -1.32  |
| P68032 ACTC_HUMAN Actin                     | 5  |                      | AGFAGDDAPR              | 20  | 10 | 17 | 127.22 | b2b3b4b8y1y2y3y4°y4y5y6°y6y7°y7y8y9y10                                                             | 976.44  | 31.469  | 1341809 | 2 | 488.73  | -4.50  |
| P68032 ACTC_HUMAN Actin                     | 6  |                      | DSYVGDEAQS KR           | 52  | 12 | 37 | 199.3  | b2°b2b3°b3b4°b4b5°b5b7°b7b10b11y1y2y3°y3y4°y4°y4y5°y5°y5y6°y6°y6y7°y7y8°y8°y8y9°y9°y9y10°y10y11y12 | 1354.62 | 24.146  | 642794  | 2 | 677.82  | -0.45  |
| P68032 ACTC_HUMAN Actin                     | 7  |                      | DLTDYLMK                | 185 | 8  | 7  | 48.38  | b5b6°b6y2y4y5y8                                                                                    | 998.48  | 71.144  | 456599  | 2 | 499.75  | -3.24  |
| P68032 ACTC_HUMAN Actin                     | 8  |                      | DSYVGDEAQS K            | 52  | 11 | 5  | 37.02  | b3°b3y4y7y8                                                                                        | 1198.53 | 26.428  | 289809  | 2 | 599.77  | 2.55   |
| P68032 ACTC_HUMAN Actin                     | 9  |                      | HQGV MVMGMGQK           | 41  | 11 | 18 | 145.69 | b1b2°b2b3b4b5b6b10y1y3°y3y4°y4y5y6y7y9y11                                                          | 1171.57 | 33.641  | 275820  | 2 | 586.29  | -2.19  |
| P68032 ACTC_HUMAN Actin                     | 10 |                      | IIAPPERK                | 330 | 8  | 12 | 76.23  | b2b3y2y3°y3y4°y4y5°y5y6y7y8                                                                        | 923.56  | 27.044  | 118599  | 2 | 462.28  | -5.29  |
| P68032 ACTC_HUMAN Actin                     | 11 |                      | IIAPPER                 | 330 | 7  | 10 | 54     | y1y3°y3y4°y4y5°y5y6°y6y7                                                                           | 795.46  | 33.740  | 77416   | 2 | 398.23  | -12.81 |
| P68032 ACTC_HUMAN Actin                     | 12 |                      | IWHHTFYNELR             | 86  | 11 | 6  | 24.51  | b10°b10y6°y6y8°y8                                                                                  | 1515.76 | 56.234  | 11854   | 2 | 758.38  | 5.32   |
| P68032 ACTC_HUMAN Actin                     | 13 |                      | YSVWIGGSILASLSTFQMQWISK | 338 | 23 | 8  | 28.52  | b4b5°b5b7°b7y2y4y16                                                                                | 2602.34 | 136.477 | 8144    | 3 | 868.12  | 0.84   |
| P68032 ACTC_HUMAN Actin                     | 14 |                      | GYSFVTTAER              | 198 | 10 | 3  | 27.12  | b6y6y8                                                                                             | 1130.55 | 79.125  | 3094    | 1 | 1130.55 | -1.30  |



|                         |    |                                                                    |                                        |     |    |    |        |                                                                                                    |         |         |         |   |         |        |
|-------------------------|----|--------------------------------------------------------------------|----------------------------------------|-----|----|----|--------|----------------------------------------------------------------------------------------------------|---------|---------|---------|---|---------|--------|
| P68032 ACTC_HUMAN Actin | 15 | Carbamidomethyl+C(2);<br>Carbamidomethyl+C(12);<br>:Oxidation+M(1) | MCDDEETTALVCDNGSLVK                    | 0   | 20 | 3  | 23.93  | y9y10y16                                                                                           | 2229.93 | 54.964  | 10002   | 3 | 743.98  | 0.77   |
| P68133 ACTS_HUMAN Actin | 1  |                                                                    | SYELPDGQVITIGNER                       | 240 | 16 | 26 | 193.4  | b2b3b4°b4b8b9°b9b10b12°b12y3*y3y4*y4y5y6*y6y7y8y10*y10y11y12°y12y13y16                             | 1790.90 | 71.713  | 2411471 | 2 | 895.95  | 2.39   |
| P68133 ACTS_HUMAN Actin | 2  |                                                                    | EITALAPSTMK                            | 317 | 11 | 25 | 143.93 | b2°b2b3°b3b4°b4b5°b5b6°b6b11y2y3°y3y4°y4y5°y5y6°y6y7y8y9°y9y11                                     | 1161.62 | 51.214  | 2069748 | 2 | 581.31  | -2.94  |
| P68133 ACTS_HUMAN Actin | 3  |                                                                    | YPIEHGITTNWDDMEK                       | 70  | 16 | 28 | 209.71 | b2b6b8b9b11*b11b12*b12b13b15y1y2°y2y3y4y5y6y7*y7y8*y8y12y13y14y15*y15y16*y16                       | 1960.90 | 67.180  | 1649801 | 3 | 654.30  | -6.85  |
| P68133 ACTS_HUMAN Actin | 4  |                                                                    | AVFPSIVGRPR                            | 30  | 11 | 14 | 114.32 | b2b3y1y2y3y4y5y6y7y8°y8y9y10y11                                                                    | 1198.70 | 56.497  | 1585024 | 2 | 599.86  | -1.32  |
| P68133 ACTS_HUMAN Actin | 5  |                                                                    | AGFAGDDAPR                             | 20  | 10 | 17 | 127.22 | b2b3b4b8y1y2y3y4°y4y5y6°y6y7°y7y8y9y10                                                             | 976.44  | 31.469  | 1341809 | 2 | 488.73  | -4.50  |
| P68133 ACTS_HUMAN Actin | 6  |                                                                    | DSYVGDEAQSQR                           | 52  | 12 | 37 | 199.3  | b2°b2b3°b3b4°b4b5°b5b7°b7b10b11y1y2y3°y3y4°y4*y4y5°y5*y5y6°y6*y6y7*y7y8°y8*y8y9°y9*y9y10°y10y11y12 | 1354.62 | 24.146  | 642794  | 2 | 677.82  | -0.45  |
| P68133 ACTS_HUMAN Actin | 7  |                                                                    | DLTDYLMK                               | 185 | 8  | 7  | 48.38  | b5b6°b6y2y4y5y8                                                                                    | 998.48  | 71.144  | 456599  | 2 | 499.75  | -3.24  |
| P68133 ACTS_HUMAN Actin | 8  |                                                                    | DSYVGDEAQSQR                           | 52  | 11 | 5  | 37.02  | b3°b3y4y7y8                                                                                        | 1198.53 | 26.428  | 289809  | 2 | 599.77  | 2.55   |
| P68133 ACTS_HUMAN Actin | 9  |                                                                    | HQGVVMVGMGQK                           | 41  | 11 | 18 | 145.69 | b1b2*b2b3b4b5b6b10y1y3*y3y4*y4y5y6y7y9y11                                                          | 1171.57 | 33.641  | 275820  | 2 | 586.29  | -2.19  |
| P68133 ACTS_HUMAN Actin | 10 |                                                                    | IIAPPERK                               | 330 | 8  | 12 | 76.23  | b2b3y2y3°y3y4°y4y5°y5y6y7y8                                                                        | 923.56  | 27.044  | 118599  | 2 | 462.28  | -5.29  |
| P68133 ACTS_HUMAN Actin | 11 |                                                                    | IIAPPER                                | 330 | 7  | 10 | 54     | y1y3°y3y4°y4y5°y5y6°y6y7                                                                           | 795.46  | 33.740  | 77416   | 2 | 398.23  | -12.81 |
| P68133 ACTS_HUMAN Actin | 12 |                                                                    | IWHHTFYNELR                            | 86  | 11 | 6  | 24.51  | b10°b10y6°y6y8*y8                                                                                  | 1515.76 | 56.234  | 11854   | 2 | 758.38  | 5.32   |
| P68133 ACTS_HUMAN Actin | 13 |                                                                    | GYSFVTTAER                             | 198 | 10 | 3  | 27.12  | b6y6y8                                                                                             | 1130.55 | 79.125  | 3094    | 1 | 1130.55 | -1.30  |
| P68133 ACTS_HUMAN Actin | 14 |                                                                    | DLYANNVMSGGTTMYPGIADR                  | 293 | 21 | 4  | 21.91  | b7y7y13y17                                                                                         | 2246.04 | 100.300 | 1587    | 4 | 562.27  | 9.24   |
| P68133 ACTS_HUMAN Actin | 15 | Carbamidomethyl+C(1);<br>Carbamidomethyl+C(29)                     | CPETLFQPSFIGMESAGIHETTYNS<br>IMKCDIDIR | 258 | 34 | 6  | 23.78  | b8b9b14°b14y13y17                                                                                  | 3960.84 | 96.515  | 180655  | 4 | 990.97  | 2.96   |
| P68133 ACTS_HUMAN Actin | 16 |                                                                    | GILTLKYPIEHGITTNWDDMEK                 | 64  | 22 | 10 | 88.6   | b3y3y4y5y6y7y8y12°y12y14                                                                           | 2586.31 | 83.541  | 72971   | 4 | 647.33  | -7.08  |
| P68133 ACTS_HUMAN Actin | 17 |                                                                    | GYSFVTTAEREIVR                         | 198 | 14 | 5  | 19.46  | b12°b12y9y13°y13                                                                                   | 1627.84 | 136.712 | 6217    | 1 | 1627.84 | 0.60   |
| P68133 ACTS_HUMAN Actin | 18 |                                                                    | YPIEHGITTNWDDMEKIWHHTFYNELR            | 70  | 27 | 6  | 39.98  | b5b6b7b9y5y8                                                                                       | 3457.69 | 126.784 | 3906    | 3 | 1153.24 | 14.47  |
| P68133 ACTS_HUMAN Actin | 19 |                                                                    | DSYVGDEAQSQR                           | 52  | 12 | 4  | 29.67  | y7°y7y8y10                                                                                         | 1354.62 | 28.745  | 3789    | 2 | 677.81  | -3.42  |
| P68133 ACTS_HUMAN Actin | 20 | Carbamidomethyl+C(1);<br>Phosphoryl STY()                          | CPETLFQPSFIGMESAGIHETTYNS<br>IMK       | 258 | 28 | 7  | 43.97  | b3b10y7y8y11y12y14                                                                                 | 3268.44 | 87.952  | 17737   | 4 | 817.87  | 3.51   |
| P68133 ACTS_HUMAN Actin | 21 | Phosphoryl STY()                                                   | YSVWIGGSILASLSTFQQMWITK                | 338 | 23 | 3  | 13.16  | b6y8y10                                                                                            | 2696.28 | 103.230 | 8999    | 3 | 899.43  | -10.59 |
| P68133 ACTS_HUMAN Actin | 22 | Oxidation+M(15)                                                    | KDLYANNVMSGGTTMYPGIADR                 | 292 | 22 | 4  | 24.43  | b7y11y13y14                                                                                        | 2390.10 | 66.726  | 6881    | 2 | 1195.55 | -6.33  |

|                                           |    |                       |                                            |     |    |    |        |                                                                                |         |         |        |   |         |        |
|-------------------------------------------|----|-----------------------|--------------------------------------------|-----|----|----|--------|--------------------------------------------------------------------------------|---------|---------|--------|---|---------|--------|
| P68133 ACTS_HUMAN Actin                   | 23 |                       | DSYVGDEAQSQR                               | 52  | 12 | 0  | 2.78   |                                                                                | 1337.60 | 24.154  | 21505  | 3 | 446.54  | 6.39   |
| P68363 TBA1B_HUMAN Tubulin alpha-1B chain | 1  |                       | VGINYQPPTVPPGGDLAK                         | 352 | 18 | 12 | 60.45  | b3b6*b6b10b11*b11y2y3y7y8y12y18                                                | 1824.99 | 66.098  | 328422 | 2 | 913.00  | 3.14   |
| P68363 TBA1B_HUMAN Tubulin alpha-1B chain | 2  |                       | AVFVDLEPTVIDEVR                            | 64  | 15 | 14 | 128.04 | b1b3b5b6b7y2y3y5y8y10y11y12y13y15                                              | 1701.91 | 84.859  | 192667 | 2 | 851.46  | 1.51   |
| P68363 TBA1B_HUMAN Tubulin alpha-1B chain | 3  |                       | NLDIERPTYTNLNR                             | 215 | 14 | 15 | 63.46  | b2*b2b3b5b10y2y4*y4y7y8*y8y12*y12*y12y14                                       | 1718.86 | 53.199  | 137824 | 3 | 573.63  | -11.36 |
| P68363 TBA1B_HUMAN Tubulin alpha-1B chain | 4  | Carbamidomethyl+C(8)  | SIQFVDWCPTGFK                              | 339 | 13 | 13 | 141.72 | b3b4b5*b5y3y5y6y7y8y9y10y11y13                                                 | 1584.76 | 83.185  | 132896 | 2 | 792.89  | 7.70   |
| P68363 TBA1B_HUMAN Tubulin alpha-1B chain | 5  |                       | DVNAAIATIK                                 | 326 | 10 | 5  | 39.63  | b3b7y3y8y10                                                                    | 1015.58 | 52.681  | 66381  | 2 | 508.29  | -0.54  |
| P68363 TBA1B_HUMAN Tubulin alpha-1B chain | 6  |                       | EDMAALEK                                   | 422 | 8  | 6  | 24.78  | b2b4*y2y4y5y8                                                                  | 906.42  | 36.896  | 49769  | 2 | 453.71  | -6.53  |
| P68363 TBA1B_HUMAN Tubulin alpha-1B chain | 7  |                       | FDGALNVDLTEFQTNLVPYPR                      | 243 | 21 | 15 | 83.88  | b1b2b3b5b11b16y2y3y4y5y6y11*y11y14y21                                          | 2409.24 | 95.365  | 45212  | 2 | 1205.12 | 11.86  |
| P68363 TBA1B_HUMAN Tubulin alpha-1B chain | 8  |                       | LSVDYGKK                                   | 156 | 8  | 8  | 62.93  | b2b4y1y3y4y5y7y8                                                               | 909.50  | 29.946  | 28802  | 2 | 455.25  | -5.97  |
| P68363 TBA1B_HUMAN Tubulin alpha-1B chain | 9  |                       | GHYTIGKEIIDLVDR                            | 105 | 16 | 4  | 25.03  | b5b7b11y16                                                                     | 1842.03 | 98.567  | 15528  | 2 | 921.52  | 8.15   |
| P68363 TBA1B_HUMAN Tubulin alpha-1B chain | 10 |                       | FDLMYAK                                    | 394 | 7  | 4  | 50.99  | b4y3y4y6                                                                       | 887.44  | 119.598 | 1608   | 1 | 887.44  | 11.90  |
| P68363 TBA1B_HUMAN Tubulin alpha-1B chain | 11 | Carbamidomethyl+C(5)  | LADQCTGLQGFLVFHSGGGTGS<br>GFTSLLMERLSVDYGK | 124 | 39 | 6  | 14.43  | b4*b4b6b15y23*y23                                                              | 4153.02 | 105.491 | 6232   | 4 | 1039.01 | 1.29   |
| P68366 TBA4A_HUMAN Tubulin alpha-4A chain | 1  |                       | VGINYQPPTVPPGGDLAK                         | 352 | 18 | 12 | 60.45  | b3b6*b6b10b11*b11y2y3y7y8y12y18                                                | 1824.99 | 66.098  | 328422 | 2 | 913.00  | 3.14   |
| P68366 TBA4A_HUMAN Tubulin alpha-4A chain | 2  |                       | AVFVDLEPTVIDEIR                            | 64  | 15 | 30 | 253.7  | b2b3b4b5*b5b6*b6b7*b7b10*b10b11b12b13y2y3*y3y4*y4y5*y5y7y8y9*y9y10y11y12y13y15 | 1715.93 | 89.487  | 173071 | 2 | 858.47  | 4.77   |
| P68366 TBA4A_HUMAN Tubulin alpha-4A chain | 3  |                       | NLDIERPTYTNLNR                             | 215 | 14 | 15 | 63.46  | b2*b2b3b5b10y2y4*y4y7y8*y8y12*y12*y12y14                                       | 1718.86 | 53.199  | 137824 | 3 | 573.63  | -11.36 |
| P68366 TBA4A_HUMAN Tubulin alpha-4A chain | 4  | Carbamidomethyl+C(8)  | SIQFVDWCPTGFK                              | 339 | 13 | 13 | 141.72 | b3b4b5*b5y3y5y6y7y8y9y10y11y13                                                 | 1584.76 | 83.185  | 132896 | 2 | 792.89  | 7.70   |
| P68366 TBA4A_HUMAN Tubulin alpha-4A chain | 5  |                       | EIIDPVDR                                   | 112 | 9  | 4  | 38.48  | y5y6y7y9                                                                       | 1069.58 | 60.204  | 87892  | 2 | 535.30  | -5.71  |
| P68366 TBA4A_HUMAN Tubulin alpha-4A chain | 6  | Carbamidomethyl+C(14) | TIGGGDSFTTFFCETGAGK                        | 40  | 20 | 15 | 85.08  | b2*b2b3*b3b4b5b12b16y2y6y7y11y13y14y20                                         | 2067.92 | 81.660  | 59733  | 2 | 1034.47 | 13.46  |
| P68366 TBA4A_HUMAN Tubulin alpha-4A chain | 7  |                       | EDMAALEK                                   | 422 | 8  | 6  | 24.78  | b2b4*y2y4y5y8                                                                  | 906.42  | 36.896  | 49769  | 2 | 453.71  | -6.53  |
| P68366 TBA4A_HUMAN Tubulin alpha-4A chain | 8  |                       | FDGALNVDLTEFQTNLVPYPR                      | 243 | 21 | 15 | 83.88  | b1b2b3b5b11b16y2y3y4y5y6y11*y11y14y21                                          | 2409.24 | 95.365  | 45212  | 2 | 1205.12 | 11.86  |
| P68366 TBA4A_HUMAN Tubulin alpha-4A chain | 9  |                       | LSVDYGKK                                   | 156 | 8  | 8  | 62.93  | b2b4y1y3y4y5y7y8                                                               | 909.50  | 29.946  | 28802  | 2 | 455.25  | -5.97  |
| P68366 TBA4A_HUMAN Tubulin alpha-4A chain | 10 |                       | FDLMYAK                                    | 394 | 7  | 4  | 50.99  | b4y3y4y6                                                                       | 887.44  | 119.598 | 1608   | 1 | 887.44  | 11.90  |
| P68366 TBA4A_HUMAN Tubulin alpha-4A chain | 11 |                       | AVFVDLEPTVIDEIRNGPYR                       | 64  | 20 | 3  | 14.51  | b3b7y8                                                                         | 2303.24 | 120.898 | 4261   | 3 | 768.42  | 14.31  |
| P68366 TBA4A_HUMAN Tubulin alpha-4A chain | 12 | Carbamidomethyl+C(9)  | RSIQFVDWCPTGFK                             | 338 | 14 | 3  | 19.46  | b9y4y6                                                                         | 1740.84 | 98.498  | 2209   | 3 | 580.95  | -7.36  |
| P68366 TBA4A_HUMAN Tubulin alpha-4A chain | 13 |                       | EIIDPVDR                                   | 112 | 9  | 0  | 1.59   |                                                                                | 1051.57 | 60.205  | 6984   | 2 | 526.29  | -2.79  |

|                                           |    |                       |                            |     |    |    |        |                                                                                             |         |        |         |   |         |        |
|-------------------------------------------|----|-----------------------|----------------------------|-----|----|----|--------|---------------------------------------------------------------------------------------------|---------|--------|---------|---|---------|--------|
| P68366 TBA4A_HUMAN Tubulin alpha-4A chain | 14 |                       | AVFVDLEPTVIDEIR            | 64  | 15 | 0  | 3.97   |                                                                                             | 1697.89 | 89.486 | 1768    | 3 | 566.63  | -9.56  |
| P68371 TBB2C_HUMAN Tubulin beta-2C chain  | 1  |                       | LAVNMVPPFR                 | 252 | 10 | 10 | 88.11  | b2b5*b5y4y5y6y7y8y9y10                                                                      | 1143.63 | 73.053 | 165955  | 2 | 572.32  | -2.99  |
| P68371 TBB2C_HUMAN Tubulin beta-2C chain  | 2  |                       | SGPFGQIFRPDNFVFGQSGAGNNWAK | 77  | 26 | 19 | 104.86 | b2*b2b3b5b7*b7b13b14*b14b15b16y1y4y6y9y12y14y18y26                                          | 2798.37 | 90.282 | 157550  | 3 | 933.46  | 8.55   |
| P68371 TBB2C_HUMAN Tubulin beta-2C chain  | 3  | Carbamidomethyl+C(23) | LTTPTYGDLNHLVSATMSGVTTCLR  | 216 | 25 | 10 | 75.02  | y2y3y5y6y7y8y12y13y22y25                                                                    | 2708.34 | 96.113 | 91949   | 3 | 903.45  | 0.45   |
| P68371 TBB2C_HUMAN Tubulin beta-2C chain  | 4  |                       | IMNTFSVVPSPK               | 162 | 12 | 5  | 34.53  | b3y4y7y8y12                                                                                 | 1319.70 | 64.056 | 73068   | 2 | 660.35  | -1.39  |
| P68371 TBB2C_HUMAN Tubulin beta-2C chain  | 5  |                       | NSSYFVEWIPNNVK             | 336 | 14 | 13 | 70.45  | b1*b1b2b8b9*b9b10y6y8y11y12*y12y14                                                          | 1696.85 | 81.608 | 69008   | 2 | 848.93  | 7.63   |
| P68371 TBB2C_HUMAN Tubulin beta-2C chain  | 6  |                       | GHYTEGAELVDSVLDVVRK        | 103 | 19 | 4  | 23.88  | b5b12b14y4                                                                                  | 2087.07 | 87.643 | 31973   | 3 | 696.36  | -1.99  |
| P68371 TBB2C_HUMAN Tubulin beta-2C chain  | 7  |                       | AVLVDLEPGTMDSVR            | 62  | 15 | 7  | 45.04  | b13*b13y3y5y7y13*y13                                                                        | 1601.81 | 95.119 | 2672    | 2 | 801.41  | -3.35  |
| P68871 HBB_HUMAN Hemoglobin subunit beta  | 1  |                       | LLVVYPWTQR                 | 31  | 10 | 20 | 130.23 | b2b3b4b5y1y2*y2y3*y3*y3y4y5*y5*y5y6*y6y7y8y9y10                                             | 1274.73 | 79.172 | 1361804 | 2 | 637.87  | -0.29  |
| P68871 HBB_HUMAN Hemoglobin subunit beta  | 2  |                       | VLGAFSDGLAHLNLIK           | 67  | 16 | 18 | 153.58 | b2b3y1y2y3y4*y4y5y6y7y9y10y11y12*y12y13y14y16                                               | 1669.87 | 77.106 | 1101162 | 3 | 557.30  | -10.23 |
| P68871 HBB_HUMAN Hemoglobin subunit beta  | 3  |                       | VNVDEVGGEALGR              | 18  | 13 | 33 | 213    | b2*b2b3b4*b4*b4b5*b5*b5b6*b6*b6b9b10b11*b11y2y3y4y6y7*y7y8y9*y9y10*y10y11*y11y12*y12y13*y13 | 1314.66 | 51.613 | 812922  | 2 | 657.84  | -0.09  |
| P68871 HBB_HUMAN Hemoglobin subunit beta  | 4  |                       | EFTPPVQAAYQK               | 121 | 12 | 24 | 151.61 | b2*b2b3*b3b4*b4b7b11*b11y2*y2y3y4y5y6*y6y7*y7y8y9*y9y10*y10y12                              | 1378.70 | 50.977 | 725171  | 2 | 689.85  | 1.24   |
| P68871 HBB_HUMAN Hemoglobin subunit beta  | 5  |                       | FFESFGDLSTPDAVMGNPK        | 41  | 19 | 24 | 212.74 | b2b3b6b7b14b17*b17y2y3y4*y4y5y6y7y8*y8y9y10y11y12y14y15y16y19                               | 2058.97 | 82.745 | 678268  | 2 | 1029.99 | 10.08  |
| P68871 HBB_HUMAN Hemoglobin subunit beta  | 6  | Carbamidomethyl+C(8)  | LLGNVLVCVLAHHFGK           | 105 | 16 | 17 | 164.74 | b2b3b4b5*b5y2y3y4y5y7y8y9y10y11y14y15y16                                                    | 1776.98 | 92.822 | 544753  | 3 | 593.00  | -10.17 |
| P68871 HBB_HUMAN Hemoglobin subunit beta  | 7  |                       | SAVTALWGK                  | 9   | 9  | 14 | 103.23 | b2b5*b5b7y1y2y3y4y5y6*y6y7y8y9                                                              | 932.51  | 61.589 | 429640  | 2 | 466.76  | -9.23  |
| P68871 HBB_HUMAN Hemoglobin subunit beta  | 8  |                       | VVAGVANALAHK               | 133 | 12 | 16 | 127.35 | b2b5y2y3y4y5y6*y6y7*y7y8y9*y9y10y11y12                                                      | 1149.67 | 42.842 | 341590  | 2 | 575.34  | -3.08  |
| P68871 HBB_HUMAN Hemoglobin subunit beta  | 9  | Carbamidomethyl+C(11) | GTFATLSELHCDK              | 83  | 13 | 17 | 136.49 | b3*b3b4b5*b5b12y2y3y4*y4y5y7y8y9*y9y11y13                                                   | 1478.70 | 54.633 | 298607  | 2 | 739.85  | 3.22   |
| P68871 HBB_HUMAN Hemoglobin subunit beta  | 10 |                       | VHLTPEEK                   | 1   | 8  | 6  | 49.63  | b2b3y4y5y6y8                                                                                | 952.50  | 26.602 | 110160  | 2 | 476.76  | -5.38  |
| P68871 HBB_HUMAN Hemoglobin subunit beta  | 11 |                       | LHVDPENFR                  | 96  | 9  | 12 | 91.69  | b2b3b4b6y2y3*y3y4*y4y5y7y9                                                                  | 1126.56 | 47.804 | 106928  | 2 | 563.78  | -3.47  |
| P68871 HBB_HUMAN Hemoglobin subunit beta  | 12 |                       | MVHLTPEEKSAVTALWGK         | 0   | 18 | 4  | 15.73  | b5b9y16*y16                                                                                 | 1997.08 | 72.104 | 882463  | 2 | 999.04  | 13.69  |
| P68871 HBB_HUMAN Hemoglobin subunit beta  | 13 | Phosphoryl STY(9)     | FFESFGDLSTPDAVMGNPK        | 41  | 19 | 3  | 15.08  | b16y10y12                                                                                   | 2138.88 | 63.859 | 5093    | 4 | 535.48  | -10.96 |

|                                              |    |                       |                             |     |    |    |        |                                                                                                               |         |        |         |   |         |        |
|----------------------------------------------|----|-----------------------|-----------------------------|-----|----|----|--------|---------------------------------------------------------------------------------------------------------------|---------|--------|---------|---|---------|--------|
| P68871 HBB_HUMAN Hemoglobin subunit beta     | 14 |                       | AGVANALAHK                  | 135 | 10 | 9  | 79.58  | b3b5*b5b6*b6b7b8*b8b9                                                                                         | 951.53  | 42.844 | 203339  | 2 | 476.27  | -6.54  |
| P68871 HBB_HUMAN Hemoglobin subunit beta     | 15 | Carbamidomethyl+C(2)  | VCVLAHHFGK                  | 111 | 10 | 1  | 7.25   | b4                                                                                                            | 1167.60 | 92.830 | 67503   | 2 | 584.30  | -6.69  |
| P68871 HBB_HUMAN Hemoglobin subunit beta     | 16 |                       | VAGVANALAHK                 | 134 | 11 | 1  | 7.63   | b3                                                                                                            | 1050.60 | 42.851 | 66632   | 2 | 525.81  | -1.16  |
| P68871 HBB_HUMAN Hemoglobin subunit beta     | 17 |                       | GAFSDGLAHLNLIK              | 69  | 14 | 0  | 4.37   |                                                                                                               | 1457.74 | 77.123 | 57284   | 2 | 729.37  | 2.93   |
| P68871 HBB_HUMAN Hemoglobin subunit beta     | 18 |                       | VTALWGK                     | 11  | 7  | 4  | 38.48  | b3*b3b4b6                                                                                                     | 774.45  | 61.586 | 43005   | 1 | 774.45  | -1.66  |
| P68871 HBB_HUMAN Hemoglobin subunit beta     | 19 | Carbamidomethyl+C(9)  | FATLSELHCDK                 | 85  | 11 | 3  | 16.56  | b3*b3b5                                                                                                       | 1320.61 | 54.632 | 16832   | 3 | 440.88  | -8.04  |
| P68871 HBB_HUMAN Hemoglobin subunit beta     | 20 |                       | ANALAHK                     | 138 | 7  | 1  | 7.63   | b4                                                                                                            | 724.41  | 42.790 | 11643   | 1 | 724.41  | 6.07   |
| P68871 HBB_HUMAN Hemoglobin subunit beta     | 21 | Carbamidomethyl+C(3)  | LVCVLAHHFGK                 | 110 | 11 | 2  | 20.97  | b3b4                                                                                                          | 1280.69 | 92.755 | 8736    | 2 | 640.85  | -5.05  |
| P68871 HBB_HUMAN Hemoglobin subunit beta     | 22 |                       | LGAFSDGLAHLNLIK             | 68  | 15 | 1  | 7.25   | b9                                                                                                            | 1570.82 | 77.127 | 6153    | 2 | 785.91  | -2.49  |
| P68871 HBB_HUMAN Hemoglobin subunit beta     | 23 |                       | LAHHFGK                     | 114 | 7  | 1  | 7.25   | b5                                                                                                            | 809.43  | 92.804 | 2581    | 2 | 405.22  | -13.35 |
| P68871 HBB_HUMAN Hemoglobin subunit beta     | 24 |                       | EFTPPVQAAYQK                | 121 | 12 | 0  | 2.78   |                                                                                                               | 1360.69 | 50.961 | 7326    | 2 | 680.85  | 5.83   |
| P68871 HBB_HUMAN Hemoglobin subunit beta     | 25 |                       | LHVDPENFR                   | 96  | 9  | 0  | 1.59   |                                                                                                               | 1109.53 | 47.804 | 5995    | 3 | 370.51  | -6.16  |
| P68871 HBB_HUMAN Hemoglobin subunit beta     | 26 | Carbamidomethyl+C(8)  | LLGNVLCVLAHHFGK             | 105 | 16 | 0  | 4.37   |                                                                                                               | 1759.96 | 92.813 | 2978    | 4 | 440.75  | -1.53  |
| P69891 HBG1_HUMAN Hemoglobin subunit gamma-1 | 1  |                       | LLVVYPWTQR                  | 31  | 10 | 20 | 130.23 | b2b3b4b5y1y2*y2y3*y3*y3y4y5*y5*y5y6*y6y7y8y9y10                                                               | 1274.73 | 79.172 | 1361804 | 2 | 637.87  | -0.29  |
| P69891 HBG1_HUMAN Hemoglobin subunit gamma-1 | 2  |                       | FFDSFGNLSSASAIMGNPK         | 41  | 19 | 6  | 15.08  | b3*b3y11*y11*y11y14                                                                                           | 1989.93 | 85.068 | 6636    | 2 | 995.47  | -2.82  |
| P69891 HBG1_HUMAN Hemoglobin subunit gamma-1 | 3  | Carbamidomethyl+C(11) | GTFAQLSELHCDK               | 83  | 13 | 4  | 20.83  | b12y7*y7y11                                                                                                   | 1505.67 | 60.391 | 4499    | 3 | 502.56  | -20.27 |
| P69891 HBG1_HUMAN Hemoglobin subunit gamma-1 | 4  | Carbamidomethyl+C(11) | GTFAQLSELHCDKLHVDPENFK      | 83  | 22 | 3  | 13.56  | b5y3y9                                                                                                        | 2585.25 | 75.703 | 51525   | 3 | 862.42  | 3.21   |
| P69891 HBG1_HUMAN Hemoglobin subunit gamma-1 | 5  |                       | MVTAVASALSSRYH              | 133 | 14 | 7  | 62.59  | b3b4b10b11y3y4*y4                                                                                             | 1492.77 | 66.171 | 10203   | 3 | 498.26  | 6.87   |
| P69891 HBG1_HUMAN Hemoglobin subunit gamma-1 | 6  |                       | MGHFTEEDKATITSLWGK          | 0   | 18 | 3  | 23.13  | b4b5y6                                                                                                        | 2050.99 | 72.138 | 9799    | 3 | 684.33  | -0.36  |
| P69891 HBG1_HUMAN Hemoglobin subunit gamma-1 | 7  | Phosphoryl STY(7)     | MVTAVASALSSR                | 133 | 12 | 3  | 26.45  | b7y5y6                                                                                                        | 1272.60 | 23.069 | 1935    | 3 | 424.87  | 3.17   |
| P69892 HBG2_HUMAN Hemoglobin subunit gamma-2 | 1  |                       | LLVVYPWTQR                  | 31  | 10 | 20 | 130.23 | b2b3b4b5y1y2*y2y3*y3*y3y4y5*y5*y5y6*y6y7y8y9y10                                                               | 1274.73 | 79.172 | 1361804 | 2 | 637.87  | -0.29  |
| P69892 HBG2_HUMAN Hemoglobin subunit gamma-2 | 2  |                       | FFDSFGNLSSASAIMGNPK         | 41  | 19 | 6  | 15.08  | b3*b3y11*y11*y11y14                                                                                           | 1989.93 | 85.068 | 6636    | 2 | 995.47  | -2.82  |
| P69892 HBG2_HUMAN Hemoglobin subunit gamma-2 | 3  |                       | LHVDPENFK                   | 96  | 9  | 6  | 45.77  | b5y6*y6y7*y7y8                                                                                                | 1098.53 | 86.341 | 3899    | 1 | 1098.53 | -21.33 |
| P69905 HBA_HUMAN Hemoglobin subunit alpha    | 1  |                       | VADALTNVAHVDDMPNLSALSDLHAHK | 62  | 29 | 39 | 275.48 | b2b3b4b5b6*b6b11*b11b13b14*b14*b14b15*b15y1y2y3y4y5y6y7*y7y8*y8y9*y9y10*y10y11y12y14y15y16y17y21y24y27y29*y29 | 2996.47 | 88.799 | 577426  | 4 | 749.87  | -6.27  |
| P69905 HBA_HUMAN Hemoglobin subunit alpha    | 2  |                       | VGAHAGEYGAEALER             | 17  | 15 | 24 | 219.31 | b2b4b5b7b8b9*b9b10*b10b11b12b13b14y1y2*y2y3y4y5y6y7y10y11y15                                                  | 1529.71 | 40.894 | 529285  | 3 | 510.58  | -13.73 |

|                                                          |    |                       |                                          |     |    |    |        |                                      |         |         |        |   |         |        |
|----------------------------------------------------------|----|-----------------------|------------------------------------------|-----|----|----|--------|--------------------------------------|---------|---------|--------|---|---------|--------|
| [P69905]HBA_HUMAN Hemoglobin subunit alpha               | 3  |                       | MFLSFPTTK                                | 32  | 9  | 16 | 103.23 | b2b3b7y1y2°y2y3°y3y4°y4y5y6y7°y7y8y9 | 1071.55 | 74.654  | 492123 | 2 | 536.28  | -5.01  |
| [P69905]HBA_HUMAN Hemoglobin subunit alpha               | 4  |                       | VDPVNFK                                  | 93  | 7  | 7  | 50.99  | b3y1y2y3*y3y5y6                      | 818.43  | 43.334  | 119093 | 2 | 409.72  | -9.02  |
| [P69905]HBA_HUMAN Hemoglobin subunit alpha               | 5  |                       | MVLSPADK                                 | 0   | 8  | 5  | 54.4   | b4b6°b6y3y5                          | 860.46  | 55.714  | 16265  | 2 | 430.73  | 2.20   |
| [P69905]HBA_HUMAN Hemoglobin subunit alpha               | 6  | Carbamidomethyl+C(5)  | LLSHCLLVTLAAHLPAEFTPAVHASLDKFLASVSTVLTSK | 100 | 40 | 9  | 73.96  | b5b6b7b14y4y5y6y7y9                  | 4258.27 | 135.924 | 20260  | 6 | 710.55  | -14.22 |
| [P69905]HBA_HUMAN Hemoglobin subunit alpha               | 7  |                       | MFLSFPTTKTYFPFHFDLSHGSAQVK               | 32  | 25 | 3  | 12.5   | b12y9y16                             | 2886.44 | 116.631 | 5688   | 3 | 962.82  | 3.13   |
| [P69905]HBA_HUMAN Hemoglobin subunit alpha               | 8  |                       | VGAHAGEYGAEALERMFSLFPTTK                 | 17  | 24 | 4  | 23.62  | b11y4y5y9                            | 2582.29 | 114.171 | 2683   | 3 | 861.43  | 6.24   |
| [P69905]HBA_HUMAN Hemoglobin subunit alpha               | 9  | Oxidation+M(1)        | MVLSPADK                                 | 0   | 8  | 3  | 36.33  | b4b7y4                               | 876.45  | 45.453  | 8966   | 2 | 438.73  | -2.09  |
| [P69905]HBA_HUMAN Hemoglobin subunit alpha               | 10 |                       | PNALSALSDLHAHK                           | 77  | 14 | 7  | 36.5   | b3b4*b4b5°b5*b5b9                    | 1473.78 | 88.794  | 10791  | 2 | 737.39  | -2.57  |
| [P69905]HBA_HUMAN Hemoglobin subunit alpha               | 11 |                       | VAHVDDMPNALSALSDLHAHK                    | 70  | 21 | 5  | 33.16  | b4b5b7b10b13                         | 2241.10 | 88.782  | 2719   | 3 | 747.70  | -4.90  |
| [P69905]HBA_HUMAN Hemoglobin subunit alpha               | 12 |                       | VGAHAGEYGAEALER                          | 17  | 15 | 0  | 3.97   |                                      | 1511.71 | 40.971  | 11033  | 3 | 504.57  | -7.19  |
| [Q01518]CAP1_HUMAN Adenylyl cyclase-associated protein 1 | 1  |                       | AGAAPYVQAFDSLLAGPVAEYLK                  | 37  | 23 | 12 | 101.89 | b2b3b7b15y3y4y5y6y7y8y9y23           | 2351.21 | 115.921 | 63617  | 3 | 784.41  | -6.33  |
| [Q01518]CAP1_HUMAN Adenylyl cyclase-associated protein 1 | 2  |                       | VENQENVSNLVIETELK                        | 330 | 18 | 11 | 111.87 | y4y5y6°y6y7y11y12y13y14y15y18        | 2073.04 | 70.527  | 38666  | 2 | 1037.03 | 4.24   |
| [Q01518]CAP1_HUMAN Adenylyl cyclase-associated protein 1 | 3  | Carbamidomethyl+C(9)  | ALLVTASQCQQAENK                          | 84  | 16 | 5  | 28.59  | b3b4b14y12y16                        | 1757.88 | 44.258  | 33574  | 2 | 879.45  | -0.42  |
| [Q01518]CAP1_HUMAN Adenylyl cyclase-associated protein 1 | 4  |                       | LFNHLSAVSESIQALGWVAMAPKPGPYVK            | 126 | 29 | 9  | 52.81  | b2b4b5b6b11b12*b12y6y15              | 3110.65 | 98.752  | 25276  | 3 | 1037.55 | -0.86  |
| [Q01518]CAP1_HUMAN Adenylyl cyclase-associated protein 1 | 5  |                       | KEPAVLELEGK                              | 316 | 11 | 6  | 31.5   | y2y5°y5y6y9y11                       | 1212.68 | 50.163  | 19945  | 2 | 606.85  | 0.91   |
| [Q01518]CAP1_HUMAN Adenylyl cyclase-associated protein 1 | 6  |                       | LEAVSHTSDMHR                             | 17  | 12 | 4  | 22.47  | b2b5y3y8                             | 1382.64 | 25.536  | 18100  | 3 | 461.55  | -7.42  |
| [Q01518]CAP1_HUMAN Adenylyl cyclase-associated protein 1 | 7  |                       | SSEMNVLIPTTEGGDFNEFPVPEQFK               | 433 | 25 | 5  | 19.02  | b3y3y5y17y25                         | 2811.35 | 92.275  | 14893  | 2 | 1406.18 | 10.25  |
| [Q01518]CAP1_HUMAN Adenylyl cyclase-associated protein 1 | 8  | Carbamidomethyl+C(9)  | INSITVDNCK                               | 366 | 10 | 6  | 40.42  | b2b9y3y6y7y10                        | 1163.58 | 35.767  | 7166   | 2 | 582.29  | 3.15   |
| [Q01518]CAP1_HUMAN Adenylyl cyclase-associated protein 1 | 9  | Carbamidomethyl+C(5)  | NSLDCEIVSAK                              | 422 | 11 | 4  | 35.59  | b8b10y8y10                           | 1235.58 | 44.087  | 25437  | 2 | 618.30  | -8.79  |
| [Q01518]CAP1_HUMAN Adenylyl cyclase-associated protein 1 | 10 |                       | AVGR                                     | 13  | 4  | 1  | 12.91  | b3                                   | 402.25  | 97.901  | 6884   | 1 | 402.25  | 0.15   |
| [Q01518]CAP1_HUMAN Adenylyl cyclase-associated protein 1 | 11 |                       | EFHTTGLAWSK                              | 198 | 11 | 4  | 35.59  | b6b8y3y8                             | 1276.61 | 100.358 | 4645   | 1 | 1276.61 | -17.98 |
| [Q01518]CAP1_HUMAN Adenylyl cyclase-associated protein 1 | 12 | Carbamidomethyl+C(9)  | ALLVTASQCQQAENKLSDLLAPISEIQK             | 84  | 29 | 5  | 35.77  | b3b4b15y7y8                          | 3165.71 | 90.010  | 59647  | 3 | 1055.91 | 7.17   |
| [Q01518]CAP1_HUMAN Adenylyl cyclase-associated protein 1 | 13 | Carbamidomethyl+C(12) | VPTISINKTDGCHAYLSK                       | 404 | 18 | 3  | 24.65  | y12y16y17                            | 2004.00 | 49.531  | 26144  | 4 | 501.76  | -8.95  |
| [Q01518]CAP1_HUMAN Adenylyl cyclase-associated protein 1 | 14 |                       | ISKEIGGDVQK                              | 60  | 11 | 3  | 24.51  | b8y5y8                               | 1173.63 | 103.872 | 9949   | 2 | 587.32  | -11.75 |
| [Q01518]CAP1_HUMAN Adenylyl cyclase-associated protein 1 | 15 |                       | LEAVSHTSDMHRGYADSPSK                     | 17  | 20 | 3  | 21.3   | y5y8y14                              | 2188.02 | 91.646  | 7351   | 4 | 547.76  | 4.69   |
| [Q01518]CAP1_HUMAN Adenylyl cyclase-associated protein 1 | 16 | Carbamidomethyl+C(12) | LERALLVTASQCQQAENK                       | 81  | 19 | 6  | 26.1   | b12y3y5°y5y6*y6                      | 2156.09 | 91.713  | 5714   | 3 | 719.37  | -12.46 |
| [Q01518]CAP1_HUMAN Adenylyl cyclase-associated protein 1 | 17 |                       | AVGRLEAVSHTSDMHR                         | 13  | 16 | 4  | 17.33  | b3y6y9°y9                            | 1765.85 | 106.981 | 2667   | 2 | 883.43  | -14.79 |
| [Q01518]CAP1_HUMAN Adenylyl cyclase-associated protein 1 | 18 |                       | ADMQNLVERLER                             | 1   | 12 | 4  | 37.54  | b6b8b11y10                           | 1473.73 | 114.957 | 2303   | 2 | 737.37  | -9.77  |
| [Q01518]CAP1_HUMAN Adenylyl cyclase-associated protein 1 | 19 | Oxidation+M(4)        | SSEMNVLIPTTEGGDFNEFPVPEQFK               | 433 | 25 | 6  | 22.05  | b10*b10b11*b11y10*y10                | 2827.32 | 118.883 | 2126   | 3 | 943.11  | 1.21   |

|                                                         |    |                                                      |                                                             |     |    |    |       |                                        |         |         |        |   |         |        |
|---------------------------------------------------------|----|------------------------------------------------------|-------------------------------------------------------------|-----|----|----|-------|----------------------------------------|---------|---------|--------|---|---------|--------|
| Q01518 CAP1_HUMAN Adenylyl cyclase-associated protein 1 | 20 |                                                      | QENVSNLVIEDTELK                                             | 333 | 15 | 0  | 5.16  |                                        | 1730.88 | 70.466  | 35313  | 2 | 865.94  | -1.20  |
| Q13418 ILK_HUMAN Integrin-linked protein kinase         | 1  |                                                      | FDMIVPILEK                                                  | 438 | 10 | 6  | 43.43 | b2b3*b3y5y6y7                          | 1204.67 | 89.024  | 48132  | 2 | 602.84  | 4.66   |
| Q13418 ILK_HUMAN Integrin-linked protein kinase         | 2  |                                                      | LNENHSGELWK                                                 | 198 | 11 | 7  | 70.43 | b8b9y6y7y8y9y11                        | 1326.64 | 41.858  | 47143  | 3 | 442.88  | -6.35  |
| Q13418 ILK_HUMAN Integrin-linked protein kinase         | 3  |                                                      | EVPFADLSNMEIGMK                                             | 388 | 15 | 5  | 40.94 | y1y3y12y13y14                          | 1680.81 | 85.028  | 35157  | 2 | 840.91  | 8.06   |
| Q13418 ILK_HUMAN Integrin-linked protein kinase         | 4  | Carbamidomethyl+C(5)                                 | FSFQCQGR                                                    | 341 | 8  | 7  | 49.63 | b2b3*b3y3y4y5y8                        | 998.45  | 51.009  | 29379  | 2 | 499.73  | -0.92  |
| Q13418 ILK_HUMAN Integrin-linked protein kinase         | 5  |                                                      | GDDTPLHLAASHGHR                                             | 65  | 15 | 3  | 26.39 | y4y7y8                                 | 1583.76 | 35.834  | 23159  | 3 | 528.59  | -5.40  |
| Q13418 ILK_HUMAN Integrin-linked protein kinase         | 6  | Carbamidomethyl+C(25)                                | LWLDNTENDLNQDDHGFSPH<br>WACR                                | 17  | 26 | 5  | 18.46 | b10y4y8y14y26                          | 3110.42 | 82.645  | 18309  | 3 | 1037.48 | 11.93  |
| Q13418 ILK_HUMAN Integrin-linked protein kinase         | 7  |                                                      | SADMWSFVALLWELVTR                                           | 371 | 17 | 4  | 34.67 | y4y5y6y17                              | 2024.05 | 137.479 | 4047   | 2 | 1012.53 | 9.35   |
| Q13418 ILK_HUMAN Integrin-linked protein kinase         | 8  | Carbamidomethyl+C(19)                                | VALEGLRPTIPPGISPHVCK                                        | 403 | 20 | 4  | 25.47 | b10y5y8y9                              | 2141.16 | 65.683  | 63881  | 4 | 536.04  | -15.39 |
| Q13418 ILK_HUMAN Integrin-linked protein kinase         | 9  | Carbamidomethyl+C(14)                                | IFSHPNVLPVLGACQSPPHPTLI<br>THWMPYGSLYNVLHEGTNFVVD<br>QSQAVK | 243 | 53 | 4  | 11.81 | b4b8*b8y7                              | 5863.88 | 101.725 | 36014  | 6 | 978.15  | -11.66 |
| Q13418 ILK_HUMAN Integrin-linked protein kinase         | 10 |                                                      | MYAPAWVAPEALQK                                              | 349 | 14 | 4  | 31.8  | b4b10b13y11                            | 1574.81 | 73.535  | 34198  | 2 | 787.91  | 3.02   |
| Q13418 ILK_HUMAN Integrin-linked protein kinase         | 11 | Carbamidomethyl+C(18)<br>;Carbamidomethyl+C(39)<br>) | ADINAVNEHGNVPLHYACFWGQ<br>DQVAEDLVANGALVSICNK               | 90  | 41 | 6  | 19.12 | b13*b13y3y6y10y15                      | 4509.13 | 90.900  | 8610   | 4 | 1128.04 | -0.11  |
| Q13418 ILK_HUMAN Integrin-linked protein kinase         | 12 |                                                      | NGTLNKHSGIDFK                                               | 178 | 13 | 4  | 29.94 | b7b10y3y7                              | 1430.72 | 98.569  | 1975   | 2 | 715.86  | -11.43 |
| Q13418 ILK_HUMAN Integrin-linked protein kinase         | 13 | Phosphoryl STY(11)                                   | GDDTPLHLAASHGHRDIVQK                                        | 65  | 20 | 4  | 14.51 | b9y10y12_H3PO4<br>y12*y12              | 2247.06 | 94.507  | 11407  | 3 | 749.69  | 0.54   |
| Q13418 ILK_HUMAN Integrin-linked protein kinase         | 14 | Oxidation+M()                                        | EVPFADLSNMEIGMK                                             | 388 | 15 | 4  | 26.05 | b8b10y8y10                             | 1696.79 | 71.193  | 13639  | 3 | 566.27  | 1.01   |
| Q13509 TBB3_HUMAN Tubulin beta-3 chain                  | 1  |                                                      | LAVNMVPPFR                                                  | 252 | 10 | 10 | 88.11 | b2b5*b5y4y5y6y7y8y9y<br>10             | 1143.63 | 73.053  | 165955 | 2 | 572.32  | -2.99  |
| Q13509 TBB3_HUMAN Tubulin beta-3 chain                  | 2  |                                                      | IMNTFSVVPSPK                                                | 162 | 12 | 5  | 34.53 | b3y4y7y8y12                            | 1319.70 | 64.056  | 73068  | 2 | 660.35  | -1.39  |
| Q13509 TBB3_HUMAN Tubulin beta-3 chain                  | 3  |                                                      | NSSYFVEWIPNNVK                                              | 336 | 14 | 13 | 70.45 | b1*b1b2b8b9*b9b10y6y<br>8y11y12*y12y14 | 1696.85 | 81.608  | 69008  | 2 | 848.93  | 7.63   |
| Q13509 TBB3_HUMAN Tubulin beta-3 chain                  | 4  |                                                      | GHYTEGAELVDSVLDVVRK                                         | 103 | 19 | 4  | 23.88 | b5b12b14y4                             | 2087.07 | 87.643  | 31973  | 3 | 696.36  | -1.99  |
| Q13509 TBB3_HUMAN Tubulin beta-3 chain                  | 5  |                                                      | FWEVISDEHGIDPSGNYVGSDQL<br>LER                              | 19  | 27 | 7  | 41.35 | b2y3y4y7y8y25y27                       | 3077.40 | 118.905 | 27251  | 3 | 1026.47 | -2.46  |
| Q13509 TBB3_HUMAN Tubulin beta-3 chain                  | 6  | Carbamidomethyl+C(10)                                | EIVHIQAGQCQNQIGAK                                           | 2   | 17 | 4  | 16.47 | b12y2y3y8                              | 1822.93 | 44.237  | 10446  | 2 | 911.97  | 2.41   |
| Q13509 TBB3_HUMAN Tubulin beta-3 chain                  | 7  | Carbamidomethyl+C(27)<br>;Carbamidomethyl+C(37)<br>) | VSDTVVEPYNATLSIHQLVENTDE<br>TYCIDNEALYDICFR                 | 174 | 39 | 3  | 10.86 | b7y10y25                               | 4607.15 | 90.288  | 9885   | 5 | 922.24  | 6.68   |
| Q13509 TBB3_HUMAN Tubulin beta-3 chain                  | 8  |                                                      | MSSTFIGNSTAIQELFK                                           | 362 | 17 | 5  | 16.47 | b3b9*b9y2y3                            | 1873.93 | 116.780 | 1801   | 3 | 625.32  | -1.24  |
| Q13509 TBB3_HUMAN Tubulin beta-3 chain                  | 9  |                                                      | FWEVISDEHGIDPSGNYVGSDQL<br>LERISVYYNEASSHK                  | 19  | 39 | 4  | 10.86 | b7b11y4 <sup>4</sup> y4                | 4456.02 | 95.800  | 8340   | 4 | 1114.76 | -10.74 |
| Q13509 TBB3_HUMAN Tubulin beta-3 chain                  | 10 |                                                      | VREEYPDR                                                    | 154 | 8  | 3  | 33.32 | b3y3y4                                 | 1063.53 | 59.205  | 6911   | 2 | 532.27  | 9.99   |
| Q13509 TBB3_HUMAN Tubulin beta-3 chain                  | 11 |                                                      | EEYPDRIMNTFSVVPSPK                                          | 156 | 18 | 4  | 24.65 | b7b10*b10b11                           | 2109.05 | 67.452  | 2387   | 2 | 1055.03 | 9.38   |
| Q13509 TBB3_HUMAN Tubulin beta-3 chain                  | 12 | Oxidation+M(1)                                       | MSMKEVDEQMLAIQSK                                            | 320 | 16 | 3  | 17.33 | b12b14y11                              | 1883.87 | 66.132  | 5757   | 3 | 628.63  | -9.01  |

|                                             |    |                                                                                |                                           |      |    |    |        |                                                    |         |         |        |   |         |        |
|---------------------------------------------|----|--------------------------------------------------------------------------------|-------------------------------------------|------|----|----|--------|----------------------------------------------------|---------|---------|--------|---|---------|--------|
| Q13509 TBB3_HUMAN Tubulin beta-3 chain      | 13 | Carbamidomethyl+C(15);Carbamidomethyl+C(25)                                    | LSIHQLVENTDETYCIDNEALYDICFR               | 186  | 27 | 1  | 11.48  | b13                                                | 3331.51 | 90.273  | 258736 | 3 | 1111.18 | -4.25  |
| Q13509 TBB3_HUMAN Tubulin beta-3 chain      | 14 |                                                                                | EVISDEHGIDPSGNYVGDSDLQLE R                | 21   | 25 | 0  | 8.73   |                                                    | 2744.29 | 118.978 | 4975   | 3 | 915.44  | 9.52   |
| Q13509 TBB3_HUMAN Tubulin beta-3 chain      | 15 | Carbamidomethyl+C(27);Carbamidomethyl+C(37)                                    | VSDTVVEPYNATLSIHQLVENTDETYCIDNEALYDICFR   | 174  | 39 | 1  | 11.48  | y3                                                 | 4589.13 | 90.339  | 11052  | 5 | 918.63  | 4.26   |
| Q13748 TBA3C_HUMAN Tubulin alpha-3C/D chain | 1  |                                                                                | VGINYQPPTVVPGGDLAK                        | 352  | 18 | 12 | 60.45  | b3b6*b6b10b11*b11y2y3y7y8y12y18                    | 1824.99 | 66.098  | 328422 | 2 | 913.00  | 3.14   |
| Q13748 TBA3C_HUMAN Tubulin alpha-3C/D chain | 2  |                                                                                | NLDIERPTYTNLNR                            | 215  | 14 | 15 | 63.46  | b2*b2b3b5b10y2y4*y4y7y8*y8y12*y12*y12y14           | 1718.86 | 53.199  | 137824 | 3 | 573.63  | -11.36 |
| Q13748 TBA3C_HUMAN Tubulin alpha-3C/D chain | 3  |                                                                                | DVNAAIATIK                                | 326  | 10 | 5  | 39.63  | b3b7y3y8y10                                        | 1015.58 | 52.681  | 66381  | 2 | 508.29  | -0.54  |
| Q13748 TBA3C_HUMAN Tubulin alpha-3C/D chain | 4  |                                                                                | FDGALNVDLTEFQTNLVPYPR                     | 243  | 21 | 15 | 83.88  | b1b2b3b5b11b16y2y3y4y5y6y11*y11y14y21              | 2409.24 | 95.365  | 45212  | 2 | 1205.12 | 11.86  |
| Q13748 TBA3C_HUMAN Tubulin alpha-3C/D chain | 5  |                                                                                | LSVDYGKK                                  | 156  | 8  | 8  | 62.93  | b2b4y1y3y4y5y7y8                                   | 909.50  | 29.946  | 28802  | 2 | 455.25  | -5.97  |
| Q13748 TBA3C_HUMAN Tubulin alpha-3C/D chain | 6  |                                                                                | FDLMYAK                                   | 394  | 7  | 4  | 50.99  | b4y3y4y6                                           | 887.44  | 119.598 | 1608   | 1 | 887.44  | 11.90  |
| Q13748 TBA3C_HUMAN Tubulin alpha-3C/D chain | 7  | Carbamidomethyl+C(5)                                                           | LADLCTGLQGFLIFHSFGGGTGS GFASLLMER         | 124  | 32 | 6  | 48.96  | b7b8b9b18y10y11                                    | 3359.64 | 120.899 | 69935  | 4 | 840.66  | -5.89  |
| Q13748 TBA3C_HUMAN Tubulin alpha-3C/D chain | 8  | Carbamidomethyl+C(4);Carbamidomethyl+C(20);Carbamidomethyl+C(25);Oxidation+M() | MRECISIHVGQAGVQIGNACWEL YCLEHGIQPDGQMPSDK | 0    | 40 | 6  | 22.67  | b6b17y6y7y16*y16                                   | 4600.15 | 90.225  | 2528   | 3 | 1534.05 | 11.36  |
| Q13885 TBB2A_HUMAN Tubulin beta-2A chain    | 1  |                                                                                | LAVNMVPPFR                                | 252  | 10 | 10 | 88.11  | b2b5*b5y4y5y6y7y8y9y10                             | 1143.63 | 73.053  | 165955 | 2 | 572.32  | -2.99  |
| Q13885 TBB2A_HUMAN Tubulin beta-2A chain    | 2  |                                                                                | SGPFGQIFRPDNFVFGQSGAGNN WAK               | 77   | 26 | 19 | 104.86 | b2*b2b3b5b7*b7b13b14*b14b15b16y1y4y6y9y12y14y18y26 | 2798.37 | 90.282  | 157550 | 3 | 933.46  | 8.55   |
| Q13885 TBB2A_HUMAN Tubulin beta-2A chain    | 3  | Carbamidomethyl+C(23)                                                          | LTTPTYGDLNHLVSATMSGVTTC LR                | 216  | 25 | 10 | 75.02  | y2y3y5y6y7y8y12y13y22y25                           | 2708.34 | 96.113  | 91949  | 3 | 903.45  | 0.45   |
| Q13885 TBB2A_HUMAN Tubulin beta-2A chain    | 4  |                                                                                | NSSYFVEWIPNNVK                            | 336  | 14 | 13 | 70.45  | b1*b1b2b8b9*b9b10y6y8y11y12*y12y14                 | 1696.85 | 81.608  | 69008  | 2 | 848.93  | 7.63   |
| Q13885 TBB2A_HUMAN Tubulin beta-2A chain    | 5  |                                                                                | GHYTEGAELVDSVLDVVRK                       | 103  | 19 | 4  | 23.88  | b5b12b14y4                                         | 2087.07 | 87.643  | 31973  | 3 | 696.36  | -1.99  |
| Q13885 TBB2A_HUMAN Tubulin beta-2A chain    | 6  | Carbamidomethyl+C(10)                                                          | EIVHIQAGQCNGQIGAK                         | 2    | 17 | 4  | 16.47  | b12y2y3y8                                          | 1822.93 | 44.237  | 10446  | 2 | 911.97  | 2.41   |
| Q13885 TBB2A_HUMAN Tubulin beta-2A chain    | 7  |                                                                                | LHFFMPGFAPLTSR                            | 262  | 14 | 6  | 57.15  | b3b4b8b9y5y8                                       | 1620.83 | 90.141  | 40540  | 3 | 540.95  | -6.10  |
| Q13885 TBB2A_HUMAN Tubulin beta-2A chain    | 8  |                                                                                | ISEQFTAMFR                                | 380  | 10 | 8  | 55.94  | b7b8*b8b9*b9y6*y6y8                                | 1229.58 | 136.377 | 2913   | 1 | 1229.58 | -11.62 |
| Q13885 TBB2A_HUMAN Tubulin beta-2A chain    | 9  |                                                                                | IMNTFSVMPSPK                              | 162  | 12 | 4  | 26.45  | b6*b6y6y7                                          | 1351.70 | 72.749  | 2496   | 3 | 451.24  | 20.23  |
| Q13885 TBB2A_HUMAN Tubulin beta-2A chain    | 10 |                                                                                | GSQQYRALTVPELTQMFDSK                      | 276  | 21 | 3  | 14     | b3y3y9                                             | 2427.19 | 102.927 | 10299  | 2 | 1214.10 | -2.21  |
| Q14112 NID2_HUMAN Nidogen-2                 | 1  |                                                                                | SEGPYFSLTSTEQSVK                          | 236  | 16 | 11 | 56.06  | b2*b2b9b10*b10b11y1y7y12y13y16                     | 1759.81 | 111.384 | 85395  | 2 | 880.41  | -14.01 |
| Q14112 NID2_HUMAN Nidogen-2                 | 2  |                                                                                | WRENLEHYGGTPR                             | 1021 | 14 | 4  | 19.46  | b4b10y12y14                                        | 1727.88 | 59.214  | 50254  | 3 | 576.63  | 11.87  |
| Q14112 NID2_HUMAN Nidogen-2                 | 3  |                                                                                | VLFYTDLVNPR                               | 1221 | 11 | 3  | 36.27  | y3y6y10                                            | 1336.73 | 108.106 | 21757  | 2 | 668.87  | 5.02   |

|                                               |    |                                                |                                        |      |    |    |        |                                                             |         |         |       |   |         |        |
|-----------------------------------------------|----|------------------------------------------------|----------------------------------------|------|----|----|--------|-------------------------------------------------------------|---------|---------|-------|---|---------|--------|
| Q14112 NID2_HUMAN Nidogen-2                   | 4  |                                                | FSNLYVGTNGIISTQDFPR                    | 71   | 19 | 22 | 120.83 | b3*b3b4b7*b7b11*b11b13*b13b14*b14y1y2y6y7y8*y8y11y12*y12y13 | 2129.09 | 114.954 | 20083 | 3 | 710.37  | 9.86   |
| Q14112 NID2_HUMAN Nidogen-2                   | 5  |                                                | IETSSLDGENRR                           | 1254 | 12 | 4  | 22.47  | b4y4*y4y11                                                  | 1376.66 | 54.570  | 8309  | 2 | 688.83  | -10.20 |
| Q14112 NID2_HUMAN Nidogen-2                   | 6  | Carbamidomethyl+C(13)                          | SHLYGITAVYPYCPTGR                      | 1357 | 17 | 5  | 23.16  | b3b13y9y11*y11                                              | 1954.93 | 60.471  | 3601  | 3 | 652.31  | -11.61 |
| Q14112 NID2_HUMAN Nidogen-2                   | 7  |                                                | FTPTHAFLATWEQVGAYEEVK                  | 149  | 21 | 3  | 20.65  | y3y10y14                                                    | 2424.23 | 82.567  | 30935 | 3 | 808.75  | 15.71  |
| Q14112 NID2_HUMAN Nidogen-2                   | 8  | Carbamidomethyl+C(8);<br>Carbamidomethyl+C(19) | DDQYVQCDDLGHFIPLQCHGK                  | 1035 | 22 | 4  | 29.57  | y3y5y9y10                                                   | 2642.18 | 84.535  | 25627 | 3 | 881.40  | 2.96   |
| Q14112 NID2_HUMAN Nidogen-2                   | 9  |                                                | EVQGTR                                 | 1069 | 6  | 1  | 13.7   | y5                                                          | 689.36  | 40.090  | 14616 | 1 | 689.36  | 1.24   |
| Q14112 NID2_HUMAN Nidogen-2                   | 10 |                                                | DYSLTFGAINQTWSYR                       | 683  | 16 | 4  | 28.59  | b6y8y9y13                                                   | 1921.91 | 64.911  | 12542 | 2 | 961.46  | 0.32   |
| Q14112 NID2_HUMAN Nidogen-2                   | 11 |                                                | ELYHYSdstVTSTSSR                       | 667  | 16 | 4  | 34.73  | y3y4y5*y5                                                   | 1832.84 | 30.540  | 7421  | 2 | 916.92  | 6.39   |
| Q14112 NID2_HUMAN Nidogen-2                   | 12 |                                                | ETQYVDYDFPTDFPAIAPFLADIDT<br>SHGR      | 90   | 29 | 8  | 40.2   | b15y5y6*y6y12y13*y13y15                                     | 3301.61 | 74.066  | 6777  | 3 | 1101.21 | 22.04  |
| Q14112 NID2_HUMAN Nidogen-2                   | 13 |                                                | VDTKPLEESSTLDPHTK                      | 349  | 17 | 8  | 56.08  | b4b12b14*b14y5y7y9y13                                       | 1896.95 | 108.782 | 6263  | 2 | 948.98  | -5.15  |
| Q14112 NID2_HUMAN Nidogen-2                   | 14 |                                                | GNLYWTDWNR                             | 1240 | 10 | 5  | 54.69  | b7b8y6y7y9                                                  | 1324.63 | 40.139  | 3848  | 2 | 662.82  | 16.31  |
| Q14112 NID2_HUMAN Nidogen-2                   | 15 |                                                | ENLLEHYGGTPR                           | 1023 | 12 | 3  | 22.47  | b6y7y10                                                     | 1385.70 | 72.789  | 3705  | 3 | 462.57  | 13.83  |
| Q14112 NID2_HUMAN Nidogen-2                   | 16 |                                                | HPSFPTQQLNVDR                          | 714  | 14 | 11 | 84.73  | b4b6*b6b9*b9b10*b10b11b12y6y10                              | 1639.85 | 62.987  | 3569  | 3 | 547.29  | 18.31  |
| Q14112 NID2_HUMAN Nidogen-2                   | 17 | Carbamidomethyl+C(10)                          | IHQNTIYQVCR                            | 699  | 11 | 5  | 36.27  | b3b6*b6*b6b9                                                | 1431.73 | 110.499 | 2971  | 2 | 716.37  | 9.98   |
| Q14112 NID2_HUMAN Nidogen-2                   | 18 |                                                | GTYEVGLEDNIGSNTEVFTYNAAN<br>NK         | 460  | 25 | 3  | 12.5   | b5b13y21                                                    | 2706.29 | 72.740  | 2887  | 2 | 1353.65 | 14.98  |
| Q14112 NID2_HUMAN Nidogen-2                   | 19 | Carbamidomethyl+C(1);<br>Carbamidomethyl+C(7)  | CGPNSVCINLPGSYR                        | 811  | 15 | 3  | 26.39  | y4y7y11                                                     | 1693.78 | 85.036  | 2365  | 2 | 847.40  | 2.59   |
| Q14112 NID2_HUMAN Nidogen-2                   | 20 |                                                | YPFSIVSYADHFYHTDWR                     | 1316 | 18 | 4  | 23.13  | b11*b11y7y8                                                 | 2304.09 | 107.927 | 2207  | 2 | 1152.55 | 16.64  |
| Q14112 NID2_HUMAN Nidogen-2                   | 21 |                                                | HAQAQYAYPGAR                           | 945  | 12 | 3  | 29.67  | b4b5b7                                                      | 1332.63 | 28.842  | 1808  | 2 | 666.82  | -8.15  |
| Q14112 NID2_HUMAN Nidogen-2                   | 22 |                                                | SPAPPEVDR                              | 392  | 9  | 4  | 45.77  | b4b7b8y4                                                    | 967.47  | 96.332  | 1752  | 1 | 967.47  | -14.89 |
| Q14112 NID2_HUMAN Nidogen-2                   | 23 | Carbamidomethyl+C(3)                           | LECTLPDGTGR                            | 1297 | 11 | 4  | 24.51  | b7y5y10*y10                                                 | 1218.57 | 63.858  | 1570  | 1 | 1218.57 | -9.92  |
| Q14112 NID2_HUMAN Nidogen-2                   | 24 |                                                | DGVVSVNKHSGQFTDEYLPEQR                 | 1335 | 22 | 3  | 13.56  | b8b15y9                                                     | 2505.21 | 103.801 | 22213 | 3 | 835.74  | 2.05   |
| Q14112 NID2_HUMAN Nidogen-2                   | 25 |                                                | VIQNNLKYPFSIVSYADHFYHTDWR              | 1309 | 25 | 4  | 23.28  | b10b13b14y13                                                | 3113.50 | 136.727 | 15501 | 2 | 1557.25 | -9.57  |
| Q14112 NID2_HUMAN Nidogen-2                   | 26 |                                                | SARFTPTHAFLATWEQVGAYEEVK<br>K          | 146  | 24 | 5  | 17.06  | b8b15y5y12*y12                                              | 2738.37 | 111.395 | 6205  | 3 | 913.46  | 3.92   |
| Q14112 NID2_HUMAN Nidogen-2                   | 27 |                                                | HAPRHPSFPTQQLNVDR                      | 710  | 18 | 11 | 62.3   | b3b7b8b12*b12y9y10*y10*y10y11*y11                           | 2101.04 | 117.888 | 6177  | 2 | 1051.03 | -11.62 |
| Q14112 NID2_HUMAN Nidogen-2                   | 28 |                                                | EGTSLGEVGGPDLKGQVEPWDER                | 366  | 23 | 8  | 44.02  | b3*b3b4b13b18*b18b19y13                                     | 2455.15 | 80.119  | 4693  | 3 | 819.05  | -10.44 |
| Q14112 NID2_HUMAN Nidogen-2                   | 29 | Carbamidomethyl+C(28);<br>Phosphoryl STY(19)   | GTYEVGLEDNIGSNTEVFTYNAAN<br>NKETCEHNHR | 460  | 33 | 6  | 15.7   | b9*b9b13b18*b18y14                                          | 3849.69 | 76.677  | 40283 | 3 | 1283.90 | 13.70  |
| Q14112 NID2_HUMAN Nidogen-2                   | 30 | Phosphoryl STY(10)                             | ENLLEHYGGTPR                           | 1023 | 12 | 5  | 37.54  | b9*b9y3y5y9                                                 | 1465.63 | 25.923  | 11521 | 2 | 733.32  | -2.17  |
| Q14112 NID2_HUMAN Nidogen-2                   | 31 | Phosphoryl STY(10)                             | VSGHLHVGHPTPVHFTDVDLHAYI<br>VGNDGR     | 535  | 29 | 10 | 38.22  | b8*b8b10_H3PO4<br>b10b11_HPO3<br>b11y5y9*y9y11*y11y13       | 3229.56 | 136.275 | 1636  | 4 | 808.15  | 11.57  |
| Q15404 RSU1_HUMAN Ras suppressor<br>protein 1 | 1  |                                                | AENNPWVTPIADQFQLGVSHVFE<br>YIR         | 212  | 26 | 18 | 137.03 | b2b4*b4b5b7b8b10y3y4y5y6y7y8y10y18y19y22y26                 | 3030.52 | 113.768 | 51851 | 3 | 1010.84 | 2.34   |



|                                            |    |                                                                                                                               |                                                  |     |    |    |       |                                                |         |         |        |   |         |        |
|--------------------------------------------|----|-------------------------------------------------------------------------------------------------------------------------------|--------------------------------------------------|-----|----|----|-------|------------------------------------------------|---------|---------|--------|---|---------|--------|
| Q15404 RSU1_HUMAN Ras suppressor protein 1 | 2  |                                                                                                                               | NLEVLNFFNNQIEELPTQISSLQK                         | 63  | 24 | 11 | 84.57 | b2b3b4b5y2y3y4y5y6y9y12                        | 2818.47 | 109.406 | 23269  | 3 | 940.16  | 1.47   |
| Q15404 RSU1_HUMAN Ras suppressor protein 1 | 3  |                                                                                                                               | GFGSLPALEVLDLTYNNLSENSLP<br>GNFFYLTLR            | 103 | 34 | 13 | 64.68 | b2b4*b4b5*b5b7b8y1y2y5y6y7y11                  | 3775.92 | 134.559 | 11471  | 3 | 1259.31 | 0.71   |
| Q15404 RSU1_HUMAN Ras suppressor protein 1 | 4  |                                                                                                                               | GISNMLDVNGLFTLSHITQLVLSH<br>NK                   | 25  | 26 | 5  | 18.46 | b4b11b13y3*y3                                  | 2851.49 | 113.776 | 39180  | 4 | 713.63  | -7.53  |
| Q15404 RSU1_HUMAN Ras suppressor protein 1 | 5  |                                                                                                                               | HLNLGMNR                                         | 89  | 8  | 3  | 33.32 | b7y3y4                                         | 954.48  | 46.401  | 16131  | 2 | 477.74  | -19.25 |
| Q15404 RSU1_HUMAN Ras suppressor protein 1 | 6  |                                                                                                                               | HMQANPEPPK                                       | 248 | 10 | 3  | 27.12 | b4b6y3                                         | 1148.55 | 102.610 | 1620   | 1 | 1148.55 | -3.93  |
| Q15942 Zyx_HUMAN Zyxin                     | 1  | Carbamidomethyl+C(10);<br>Carbamidomethyl+C(13);<br>Carbamidomethyl+C(16);<br>Carbamidomethyl+C(34);<br>Carbamidomethyl+C(37) | ALGQLFHIACTCHQCAQQLGGQ<br>QFYSLEGAPYCEGCYTDLTLEK | 399 | 44 | 16 | 88.95 | b3b12*b12b15b19b21b24b29b31y2y7y10y11y12y13y15 | 5228.34 | 87.770  | 120860 | 4 | 1307.84 | 5.98   |
| Q15942 Zyx_HUMAN Zyxin                     | 2  |                                                                                                                               | LGHPEALSAGTGSPPSFTYAQQ<br>R                      | 295 | 25 | 11 | 47.49 | b3b9*b9b13b15*b15y5y11y12y14y25                | 2597.29 | 57.330  | 83441  | 3 | 866.43  | 4.32   |
| Q15942 Zyx_HUMAN Zyxin                     | 3  | Carbamidomethyl+C(9)                                                                                                          | QNVAVNELCGR                                      | 375 | 11 | 5  | 41.79 | b3y4y6y8y11                                    | 1259.62 | 42.984  | 64835  | 2 | 630.32  | 5.52   |
| Q15942 Zyx_HUMAN Zyxin                     | 4  |                                                                                                                               | VNPFPRPGDSEPPAPGAQR                              | 35  | 19 | 6  | 46.5  | b2y5y7y8y9y11                                  | 1988.98 | 46.101  | 54051  | 3 | 663.67  | -4.42  |
| Q15942 Zyx_HUMAN Zyxin                     | 5  | Carbamidomethyl+C(1);<br>Carbamidomethyl+C(4)                                                                                 | CSVCSEPIMPEPRDETVR                               | 503 | 19 | 5  | 22.04 | b2y4y11y16y19                                  | 2218.98 | 50.728  | 46699  | 3 | 740.33  | -3.52  |
| Q15942 Zyx_HUMAN Zyxin                     | 6  |                                                                                                                               | EVEELEQLTQQLMQDMEHPQR                            | 354 | 21 | 12 | 54.93 | b2*b2b4*b4b5*b5b10y3y4y5y18y21                 | 2611.21 | 105.280 | 40394  | 3 | 871.08  | 0.65   |
| Q15942 Zyx_HUMAN Zyxin                     | 7  |                                                                                                                               | SPGAPGLTLK                                       | 343 | 11 | 5  | 27.52 | b3b4y2y7y11                                    | 1037.59 | 50.673  | 39617  | 2 | 519.30  | -8.71  |
| Q15942 Zyx_HUMAN Zyxin                     | 8  |                                                                                                                               | GPPASSPAPAPK                                     | 253 | 12 | 9  | 50.05 | b5*b5y1y2y4y6y9y10*y10                         | 1076.57 | 23.925  | 28984  | 2 | 538.79  | 0.68   |
| Q15942 Zyx_HUMAN Zyxin                     | 9  | Carbamidomethyl+C(1);<br>Carbamidomethyl+C(4)                                                                                 | CNTCGEPITDR                                      | 443 | 11 | 7  | 56.34 | b3y5y6*y6y9*y9y10                              | 1322.56 | 28.702  | 22610  | 2 | 661.78  | 7.01   |
| Q15942 Zyx_HUMAN Zyxin                     | 10 |                                                                                                                               | FGPVVAPKPK                                       | 25  | 10 | 4  | 34.11 | y4y6y7y10                                      | 1039.63 | 40.081  | 21018  | 2 | 520.32  | -3.29  |
| Q15942 Zyx_HUMAN Zyxin                     | 11 |                                                                                                                               | QHPVPPPAQNQNQVR                                  | 328 | 15 | 5  | 18.31 | b2b8y4y7*y7                                    | 1709.87 | 25.337  | 16983  | 3 | 570.63  | -9.78  |
| Q15942 Zyx_HUMAN Zyxin                     | 12 |                                                                                                                               | FSPGAPGSGSQPNQK                                  | 279 | 16 | 10 | 61.43 | b2b5b11b12b16y9y10y11y14y16                    | 1515.72 | 29.574  | 16438  | 2 | 758.36  | 1.29   |
| Q15942 Zyx_HUMAN Zyxin                     | 13 | Carbamidomethyl+C(1);<br>Carbamidomethyl+C(4);<br>Carbamidomethyl+C(17);<br>Carbamidomethyl+C(26)                             | CEDCGKPLSIEADDNGCFPLDGHV<br>LCR                  | 536 | 27 | 3  | 18.07 | y5y10y12                                       | 3134.34 | 69.107  | 34949  | 4 | 784.34  | -1.79  |
| Q15942 Zyx_HUMAN Zyxin                     | 14 |                                                                                                                               | VSSIDLEIDSLSLDDMTKNDPFK                          | 140 | 25 | 4  | 16.49 | b5b7y3y21                                      | 2782.35 | 124.627 | 14698  | 3 | 928.12  | -5.62  |
| Q15942 Zyx_HUMAN Zyxin                     | 15 | Carbamidomethyl+C(9);<br>Carbamidomethyl+C(12)                                                                                | QNVAVNELCGRCHQPLAR                               | 375 | 18 | 4  | 15.73 | b6*b6b11y7                                     | 2122.05 | 66.144  | 5968   | 3 | 708.02  | 5.98   |
| Q15942 Zyx_HUMAN Zyxin                     | 16 | Carbamidomethyl+C(1)                                                                                                          | CHTARAQT                                         | 564 | 8  | 3  | 36.33 | b4b6y4                                         | 944.44  | 90.451  | 3806   | 1 | 944.44  | 4.20   |
| Q15942 Zyx_HUMAN Zyxin                     | 17 |                                                                                                                               | FTPVASKFSPGAPGSGSQPNQK                           | 272 | 23 | 6  | 17.68 | b9b18y13*y13y15*y15                            | 2246.09 | 98.849  | 3703   | 3 | 749.37  | -13.80 |
| Q15942 Zyx_HUMAN Zyxin                     | 18 | Carbamidomethyl+C(1);<br>Carbamidomethyl+C(4)                                                                                 | CSVCSEPIMPEPRDETVR                               | 503 | 19 | 0  | 5.56  |                                                | 2200.95 | 50.648  | 12011  | 3 | 734.32  | -9.87  |
| Q3ZCM7 TBB8_HUMAN Tubulin beta-8 chain     | 1  |                                                                                                                               | LAVNMVPPFR                                       | 252 | 10 | 10 | 88.11 | b2b5*b5y4y5y6y7y8y9y10                         | 1143.63 | 73.053  | 165955 | 2 | 572.32  | -2.99  |
| Q3ZCM7 TBB8_HUMAN Tubulin beta-8 chain     | 2  |                                                                                                                               | MSATFIGNNTAIQELFKR                               | 362 | 18 | 4  | 22.89 | b3b10b16y18                                    | 2041.03 | 72.124  | 54621  | 3 | 681.02  | -10.35 |

|                                              |    |                                              |                                                 |     |    |    |        |                                                                        |         |         |         |   |         |        |
|----------------------------------------------|----|----------------------------------------------|-------------------------------------------------|-----|----|----|--------|------------------------------------------------------------------------|---------|---------|---------|---|---------|--------|
| Q3ZCM7 TBB8_HUMAN Tubulin beta-8 chain       | 3  | Carbamidomethyl+C(23)                        | LPTPTYGDLNHLVLSATMSGVTTCLR                      | 216 | 25 | 4  | 8.52   | b11y5°y5y25                                                            | 2704.36 | 82.680  | 7501    | 2 | 1352.68 | 6.32   |
| Q3ZCM7 TBB8_HUMAN Tubulin beta-8 chain       | 4  |                                              | MSATFIGNNTAIQELFK                               | 362 | 17 | 5  | 25.13  | b7b8°b8b13y17                                                          | 1884.98 | 97.819  | 3311    | 2 | 942.99  | 14.38  |
| Q3ZCM7 TBB8_HUMAN Tubulin beta-8 chain       | 5  |                                              | FWEVISDEHAIDSAGTYHGDSLQLER                      | 19  | 27 | 5  | 17.95  | b5b7°b7b12y13                                                          | 3112.49 | 96.513  | 7673    | 3 | 1038.17 | 17.18  |
| Q3ZCM7 TBB8_HUMAN Tubulin beta-8 chain       | 6  | Carbamidomethyl+C(5); Carbamidomethyl+C(7)   | EAESCDCLQGFQLTHSLGGGTGSGMGTLTLLSK               | 122 | 32 | 3  | 22.16  | b12b13y14                                                              | 3311.55 | 136.710 | 5654    | 2 | 1656.28 | 3.54   |
| Q3ZCM7 TBB8_HUMAN Tubulin beta-8 chain       | 7  |                                              | VSEQFTAMFR                                      | 380 | 10 | 4  | 28.88  | b3b4y5°y5                                                              | 1215.58 | 13.040  | 3109    | 2 | 608.29  | -3.01  |
| Q3ZCM7 TBB8_HUMAN Tubulin beta-8 chain       | 8  |                                              | ALTVAELTQQMFDK                                  | 282 | 15 | 4  | 26.39  | y10y13°y13y14                                                          | 1665.83 | 136.740 | 2829    | 1 | 1665.83 | -13.04 |
| Q3ZCM7 TBB8_HUMAN Tubulin beta-8 chain       | 9  | Carbamidomethyl+C(27); Carbamidomethyl+C(37) | VS DTVVPEPYNATLSVHQLIENADE TFCIDNEALYDICKS KTLK | 174 | 42 | 3  | 10.91  | b15y14y25                                                              | 4815.28 | 81.962  | 56523   | 5 | 963.86  | -4.26  |
| Q3ZCM7 TBB8_HUMAN Tubulin beta-8 chain       | 10 |                                              | RVSEQFTAMFR                                     | 379 | 11 | 3  | 24.51  | b7y3y5                                                                 | 1371.69 | 94.436  | 8849    | 2 | 686.35  | 3.47   |
| Q3ZCM7 TBB8_HUMAN Tubulin beta-8 chain       | 11 | Carbamidomethyl+C(10); Phosphoryl STY(5)     | EIVLTQIQCGCNQIGAK                               | 2   | 17 | 3  | 25.13  | y11y12y14                                                              | 1908.89 | 82.333  | 4330    | 2 | 954.95  | -11.38 |
| Q3ZCM7 TBB8_HUMAN Tubulin beta-8 chain       | 12 | Oxidation+M()                                | EVDEQMFNIQDK                                    | 324 | 12 | 3  | 22.47  | b3b5y7                                                                 | 1511.66 | 71.044  | 22382   | 2 | 756.34  | -3.07  |
| Q3ZCM7 TBB8_HUMAN Tubulin beta-8 chain       | 13 |                                              | LPTPTYGDLNHLVLSATM                              | 216 | 17 | 0  | 7.94   |                                                                        | 1829.92 | 82.628  | 5811    | 3 | 610.65  | 6.00   |
| Q562R1 ACTBL_HUMAN Beta-actin-like protein 2 | 1  |                                              | SYELPDGQVITIGNER                                | 239 | 16 | 26 | 193.4  | b2b3b4°b4b8b9°b9b10b12°b12y3°y3y4°y4y5y6°y6y7y8y10°y10y11y12°y12y13y16 | 1790.90 | 71.713  | 2411471 | 2 | 895.95  | 2.39   |
| Q562R1 ACTBL_HUMAN Beta-actin-like protein 2 | 2  |                                              | DLTDYLMK                                        | 184 | 8  | 7  | 48.38  | b5b6°b6y2y4y5y8                                                        | 998.48  | 71.144  | 456599  | 2 | 499.75  | -3.24  |
| Q562R1 ACTBL_HUMAN Beta-actin-like protein 2 | 3  |                                              | HQGVMMVGMGQK                                    | 40  | 11 | 18 | 145.69 | b1b2°b2b3b4b5b6b10y1y3°y3y4°y4y5y6y7y9y11                              | 1171.57 | 33.641  | 275820  | 2 | 586.29  | -2.19  |
| Q562R1 ACTBL_HUMAN Beta-actin-like protein 2 | 4  |                                              | IIAPPERK                                        | 329 | 8  | 12 | 76.23  | b2b3y2y3°y3y4°y4y5°y5y6y7y8                                            | 923.56  | 27.044  | 118599  | 2 | 462.28  | -5.29  |
| Q562R1 ACTBL_HUMAN Beta-actin-like protein 2 | 5  | Carbamidomethyl+C(1)                         | CDVDIRK                                         | 285 | 7  | 13 | 80.61  | b1b2°b2b3b4y1y2y3y4°y4y5y6y7                                           | 905.44  | 22.962  | 89279   | 2 | 453.23  | -7.08  |
| Q562R1 ACTBL_HUMAN Beta-actin-like protein 2 | 6  |                                              | IIAPPER                                         | 329 | 7  | 10 | 54     | y1y3°y3y4°y4y5°y5y6°y6y7                                               | 795.46  | 33.740  | 77416   | 2 | 398.23  | -12.81 |
| Q562R1 ACTBL_HUMAN Beta-actin-like protein 2 | 7  |                                              | YSVWIGGSILASLSTFQMWISK                          | 337 | 23 | 8  | 28.52  | b4b5°b5b7°b7y2y4y16                                                    | 2602.34 | 136.477 | 8144    | 3 | 868.12  | 0.84   |
| Q562R1 ACTBL_HUMAN Beta-actin-like protein 2 | 8  | Carbamidomethyl+C(1)                         | CPEAIFQPSFLGISSGIHETTFNSIMK                     | 257 | 28 | 5  | 25.48  | b1b5b7b10b13                                                           | 3140.49 | 90.124  | 4290    | 4 | 785.88  | -5.83  |
| Q562R1 ACTBL_HUMAN Beta-actin-like protein 2 | 9  |                                              | LDLAGR                                          | 178 | 6  | 2  | 27     | y4y5                                                                   | 644.37  | 34.027  | 70763   | 1 | 644.37  | 1.52   |
| Q562R1 ACTBL_HUMAN Beta-actin-like protein 2 | 10 | Carbamidomethyl+C(1)                         | CDVDIR                                          | 285 | 6  | 8  | 66.91  | b3b4y3°y3y4°y4y5°y5                                                    | 777.35  | 28.924  | 70467   | 2 | 389.18  | -7.22  |
| Q562R1 ACTBL_HUMAN Beta-actin-like protein 2 | 11 |                                              | YPIEHGVVTNWDDEMEK                               | 69  | 16 | 6  | 37.57  | b11°b11b12°b12y12y13                                                   | 1932.84 | 54.720  | 36675   | 2 | 966.92  | -20.65 |
| Q562R1 ACTBL_HUMAN Beta-actin-like protein 2 | 12 |                                              | MTQIMFEAFNTPAMYVAIQAVLSLYASGR                   | 119 | 29 | 8  | 24.46  | b5°b5°b5b8°b8b14b18y7                                                  | 3223.56 | 77.451  | 7086    | 4 | 806.65  | -10.53 |
| Q562R1 ACTBL_HUMAN Beta-actin-like protein 2 | 13 |                                              | GVLTLK                                          | 63  | 6  | 1  | 13.7   | y5                                                                     | 630.42  | 44.042  | 6771    | 1 | 630.42  | -4.36  |
| Q562R1 ACTBL_HUMAN Beta-actin-like protein 2 | 14 |                                              | IWYHTFYNELR                                     | 85  | 11 | 4  | 27.52  | b9°b9y9y10                                                             | 1541.74 | 73.411  | 5717    | 3 | 514.58  | -9.34  |
| Q562R1 ACTBL_HUMAN Beta-actin-like protein 2 | 15 | Carbamidomethyl+C(2)                         | LCYVALDFEQEMVR                                  | 216 | 14 | 8  | 63.46  | b3b5b9b10y6y8y11°y11                                                   | 1772.81 | 106.922 | 2850    | 3 | 591.61  | -11.29 |

|                                                       |    |                                                |                                  |     |    |    |       |                                            |         |         |        |   |         |        |
|-------------------------------------------------------|----|------------------------------------------------|----------------------------------|-----|----|----|-------|--------------------------------------------|---------|---------|--------|---|---------|--------|
| [Q562R1 ACTBL_HUMAN Beta-actin-like protein 2         | 16 |                                                | DLYANTVLSGGSTMYPGIADRMQ<br>K     | 292 | 24 | 12 | 41.44 | b11°b11*b11b14°b14y5<br>y6°y6y12°y12y21y23 | 2588.23 | 121.726 | 31518  | 3 | 863.41  | -8.68  |
| [Q562R1 ACTBL_HUMAN Beta-actin-like protein 2         | 17 | Carbamidomethyl+C(17)                          | TDNELSALVVDNGSGMCKAGFG<br>GDDAPR | 1   | 28 | 3  | 11.78 | b5b15y5                                    | 2853.28 | 69.657  | 2630   | 3 | 951.77  | 2.05   |
| [Q562R1 ACTBL_HUMAN Beta-actin-like protein 2         | 18 | Carbamidomethyl+C(4)                           | EKLCYVALDFEQEMVR                 | 214 | 16 | 3  | 23.86 | b12y5y6                                    | 2029.95 | 127.123 | 2161   | 2 | 1015.48 | -9.80  |
| [Q562R1 ACTBL_HUMAN Beta-actin-like protein 2         | 19 | Carbamidomethyl+C(1);<br>Phosphoryl STY(15)    | CPEAIFQPSFLGIESSGIHETTFNSI<br>MK | 257 | 28 | 4  | 22.8  | y8*y8y12y13                                | 3220.46 | 126.754 | 3881   | 4 | 805.87  | -1.82  |
| [Q562R1 ACTBL_HUMAN Beta-actin-like protein 2         | 20 | Phosphoryl STY(6)                              | GYNFITTAER                       | 197 | 10 | 8  | 81.8  | b3*b3b4b5b6_H3PO4<br>b6b8*b8b9             | 1239.49 | 25.962  | 2494   | 2 | 620.25  | -5.12  |
| [Q562R1 ACTBL_HUMAN Beta-actin-like protein 2         | 21 |                                                | DLTDYLMK                         | 184 | 8  | 0  | 1.19  |                                            | 980.47  | 71.168  | 49232  | 2 | 490.74  | 1.93   |
| [Q58FF3 ENPLL_HUMAN Putative endoplasmin-like protein | 1  | Carbamidomethyl+C(1)                           | CVFITDDFRDTPMK                   | 71  | 14 | 5  | 44.82 | b3b5b6y12y13                               | 1744.79 | 90.881  | 7253   | 3 | 582.27  | -6.79  |
| [Q58FF3 ENPLL_HUMAN Putative endoplasmin-like protein | 2  |                                                | LGVIEDHSNR                       | 150 | 10 | 5  | 43.43 | b9y5y6y7y10                                | 1139.58 | 31.310  | 3766   | 2 | 570.29  | -0.32  |
| [Q58FF3 ENPLL_HUMAN Putative endoplasmin-like protein | 3  |                                                | FQSSHHPADITSLHQDVER              | 168 | 19 | 8  | 52.28 | b3b5b13b16y4°y4y5y11                       | 2204.06 | 81.672  | 38787  | 3 | 735.36  | 4.21   |
| [Q58FF3 ENPLL_HUMAN Putative endoplasmin-like protein | 4  |                                                | IADEK                            | 131 | 5  | 2  | 26.6  | b3y3                                       | 575.31  | 25.801  | 16432  | 1 | 575.31  | 6.68   |
| [Q58FF3 ENPLL_HUMAN Putative endoplasmin-like protein | 5  |                                                | AETIQEVEDEYK                     | 1   | 12 | 6  | 26.45 | b10*b10y7y8°y8*y8                          | 1453.69 | 53.219  | 14251  | 2 | 727.35  | 17.38  |
| [Q58FF3 ENPLL_HUMAN Putative endoplasmin-like protein | 6  |                                                | QETAK                            | 385 | 5  | 1  | 13.3  | y3                                         | 576.30  | 27.186  | 10541  | 1 | 576.30  | 3.18   |
| [Q58FF3 ENPLL_HUMAN Putative endoplasmin-like protein | 7  | Carbamidomethyl+C(6);<br>Carbamidomethyl+C(12) | AMVSQLTESLCLVASQYGWGSG<br>NMER   | 272 | 27 | 3  | 21.99 | b11y11y12                                  | 3048.43 | 86.046  | 10326  | 4 | 762.86  | 20.50  |
| [Q58FF3 ENPLL_HUMAN Putative endoplasmin-like protein | 8  |                                                | DMLR                             | 334 | 4  | 2  | 12.91 | b3°b3                                      | 534.27  | 36.366  | 8508   | 1 | 534.27  | 1.94   |
| [Q58FF3 ENPLL_HUMAN Putative endoplasmin-like protein | 9  |                                                | GISTNYHASR                       | 310 | 10 | 5  | 40.42 | b5b6*b6b9y3                                | 1105.52 | 67.064  | 5938   | 1 | 1105.52 | -20.87 |
| [Q58FF3 ENPLL_HUMAN Putative endoplasmin-like protein | 10 |                                                | TVLDLAVVEEPDEEPEETAEDK           | 347 | 22 | 6  | 44.92 | b15y4y5y6y8y15                             | 2457.19 | 90.311  | 4728   | 2 | 1229.10 | 20.57  |
| [Q58FF3 ENPLL_HUMAN Putative endoplasmin-like protein | 11 |                                                | DTMPK                            | 80  | 5  | 1  | 13.3  | y4                                         | 591.28  | 100.327 | 2024   | 1 | 591.28  | -0.83  |
| [Q58FF3 ENPLL_HUMAN Putative endoplasmin-like protein | 12 |                                                | EMDVGTDEEKQETAK                  | 375 | 15 | 3  | 26.39 | y4y8y14                                    | 1709.77 | 38.003  | 30768  | 3 | 570.60  | 11.71  |
| [Q58FF3 ENPLL_HUMAN Putative endoplasmin-like protein | 13 |                                                | AQAYQTGKGISTNYHASR               | 302 | 18 | 3  | 23.13 | b13b14y4                                   | 1952.97 | 119.468 | 19904  | 3 | 651.66  | 6.69   |
| [Q58FF3 ENPLL_HUMAN Putative endoplasmin-like protein | 14 | Carbamidomethyl+C(14)                          | GVVDSGGLSLNVSCETLQQHKLL<br>K     | 91  | 24 | 3  | 22.11 | b14y10y11                                  | 2582.37 | 136.837 | 5288   | 2 | 1291.69 | 4.63   |
| [Q58FF3 ENPLL_HUMAN Putative endoplasmin-like protein | 15 |                                                | YNDTFWKEFGTNIK                   | 136 | 14 | 6  | 33.28 | b11b13y11*y11y12°y12                       | 1762.83 | 136.722 | 3143   | 1 | 1762.83 | -6.51  |
| [Q58FF3 ENPLL_HUMAN Putative endoplasmin-like protein | 16 | Carbamidomethyl+C(15)                          | AETIQEVEDEYKAFCK                 | 1   | 16 | 3  | 17.33 | b9b11y6                                    | 1959.90 | 123.773 | 1969   | 2 | 980.45  | 0.69   |
| [Q58FF3 ENPLL_HUMAN Putative endoplasmin-like protein | 17 | Phosphoryl STY(6)                              | GLFDEYGSKK                       | 52  | 10 | 3  | 27.12 | b5y5y9                                     | 1223.51 | 19.770  | 3756   | 3 | 408.51  | -11.67 |
| [Q58FF3 ENPLL_HUMAN Putative endoplasmin-like protein | 18 | Phosphoryl STY()                               | QETAKESTAEKDEL                   | 385 | 14 | 4  | 19.46 | b6*b6y6y11                                 | 1658.72 | 43.311  | 2219   | 2 | 829.86  | 9.27   |
| [Q58FF3 ENPLL_HUMAN Putative endoplasmin-like protein | 19 | Carbamidomethyl+C(1);<br>Oxidation+M(12)       | CVFITDDFRDTPMK                   | 71  | 14 | 3  | 24.9  | b9y4y5                                     | 1760.77 | 90.897  | 8661   | 3 | 587.60  | -14.42 |
| [Q58FF3 ENPLL_HUMAN Putative endoplasmin-like protein | 20 | Oxidation+M(8)                                 | EQDKDKEMDVGTDDEEK                | 369 | 16 | 4  | 17.33 | b10y4y11°y11                               | 1911.84 | 46.525  | 5950   | 2 | 956.42  | 13.15  |
| [Q6PEY2 TBA3E_HUMAN Tubulin alpha-3E chain            | 1  |                                                | VGINYQPPTVPPGGDLAK               | 352 | 18 | 12 | 60.45 | b3b6*b6b10b11°b11y2y<br>3y7y8y12y18        | 1824.99 | 66.098  | 328422 | 2 | 913.00  | 3.14   |

|                                                    |    |                      |                               |      |    |    |        |                                                                                |         |         |         |   |         |        |
|----------------------------------------------------|----|----------------------|-------------------------------|------|----|----|--------|--------------------------------------------------------------------------------|---------|---------|---------|---|---------|--------|
| Q6PEY2 TBA3E_HUMAN Tubulin alpha-3E chain          | 2  |                      | NLDIERPTYTNLNR                | 215  | 14 | 15 | 63.46  | b2*b2b3b5b10y2y4*y4y7y8*y8y12°y12*y12y14                                       | 1718.86 | 53.199  | 137824  | 3 | 573.63  | -11.36 |
| Q6PEY2 TBA3E_HUMAN Tubulin alpha-3E chain          | 3  |                      | DVNAAIATIK                    | 326  | 10 | 5  | 39.63  | b3b7y3y8y10                                                                    | 1015.58 | 52.681  | 66381   | 2 | 508.29  | -0.54  |
| Q6PEY2 TBA3E_HUMAN Tubulin alpha-3E chain          | 4  |                      | FDGALNVDLTEFQTNLVPYPR         | 243  | 21 | 15 | 83.88  | b1b2b3b5b11b16y2y3y4y5y6y11°y11y14y21                                          | 2409.24 | 95.365  | 45212   | 2 | 1205.12 | 11.86  |
| Q6PEY2 TBA3E_HUMAN Tubulin alpha-3E chain          | 5  |                      | FDLMYAK                       | 394  | 7  | 4  | 50.99  | b4y3y4y6                                                                       | 887.44  | 119.598 | 1608    | 1 | 887.44  | 11.90  |
| Q6PEY2 TBA3E_HUMAN Tubulin alpha-3E chain          | 6  |                      | EDAASNYARGHYTIGK              | 96   | 16 | 5  | 31.04  | b9b15°b15y12y13                                                                | 1752.84 | 71.283  | 2310    | 3 | 584.95  | 5.43   |
| Q6S8J3 A26CA_HUMAN ANKRD26-like family C member 1A | 1  |                      | SYELPDGQVITIGNER              | 938  | 16 | 26 | 193.4  | b2b3b4°b4b8b9°b9b10b12°b12y3*y3y4*y4y5y6*y6y7y8y10*y10y11y12°y12y13y16         | 1790.90 | 71.713  | 2411471 | 2 | 895.95  | 2.39   |
| Q6S8J3 A26CA_HUMAN ANKRD26-like family C member 1A | 2  |                      | AVFPSIVGRPR                   | 728  | 11 | 14 | 114.32 | b2b3y1y2y3y4y5y6y7y8°y8y9y10y11                                                | 1198.70 | 56.497  | 1585024 | 2 | 599.86  | -1.32  |
| Q6S8J3 A26CA_HUMAN ANKRD26-like family C member 1A | 3  |                      | AGFAGDDAPR                    | 718  | 10 | 17 | 127.22 | b2b3b4b8y1y2y3y4°y4y5y6°y6y7°y7y8y9y10                                         | 976.44  | 31.469  | 1341809 | 2 | 488.73  | -4.50  |
| Q6S8J3 A26CA_HUMAN ANKRD26-like family C member 1A | 4  | Carbamidomethyl+C(2) | LCYVALDFEQEMATAASSSSLEK       | 915  | 23 | 29 | 218.38 | b2b3b4b5b6b7°b7b8b9b11°b11b16y1y4y5y6y7y9y10°y10y11°y11y12y14y16y17°y17y23*y23 | 2550.20 | 93.001  | 369954  | 2 | 1275.60 | 9.57   |
| Q6S8J3 A26CA_HUMAN ANKRD26-like family C member 1A | 5  |                      | QEYDESGPSIVHRK                | 1059 | 14 | 18 | 140.35 | b3°b3*b3b14y2y3y4y5y6y7y8y9y10°y10y11y12y14*y14                                | 1644.78 | 32.324  | 365178  | 3 | 548.93  | -12.02 |
| Q6S8J3 A26CA_HUMAN ANKRD26-like family C member 1A | 6  |                      | QEYDESGPSIVHR                 | 1059 | 13 | 9  | 93.28  | y2y3y4y5y6y8y10°y10y11                                                         | 1516.69 | 38.236  | 317262  | 3 | 506.24  | -7.73  |
| Q6S8J3 A26CA_HUMAN ANKRD26-like family C member 1A | 7  |                      | HGSTHVGFPENLTNGATAGNGDDGLIPPR | 544  | 29 | 7  | 25.36  | b1b7b8b16y13y15°y15                                                            | 2901.37 | 68.635  | 31661   | 4 | 726.10  | -5.72  |
| Q6S8J3 A26CA_HUMAN ANKRD26-like family C member 1A | 8  |                      | IWHHTFYNELR                   | 784  | 11 | 6  | 24.51  | b10*b10y6°y6y8*y8                                                              | 1515.76 | 56.234  | 11854   | 2 | 758.38  | 5.32   |
| Q6S8J3 A26CA_HUMAN ANKRD26-like family C member 1A | 9  |                      | MTQIMFETFNTPAMYVAIQAVPSLYTSGR | 818  | 29 | 3  | 22.01  | b3y6y7                                                                         | 3267.53 | 80.560  | 7199    | 3 | 1089.85 | -17.56 |
| Q6S8J3 A26CA_HUMAN ANKRD26-like family C member 1A | 10 |                      | EEIAMLRLLEDTMK                | 652  | 14 | 3  | 35.03  | y3y4y5                                                                         | 1691.88 | 77.133  | 59259   | 2 | 846.44  | 4.04   |
| Q6S8J3 A26CA_HUMAN ANKRD26-like family C member 1A | 11 | Carbamidomethyl+C(4) | EKLCYVALDFEQEMATAASSSSLEK     | 913  | 25 | 5  | 16.49  | b11b21y10y14*y14                                                               | 2807.31 | 73.407  | 22173   | 3 | 936.44  | -1.04  |
| Q6S8J3 A26CA_HUMAN ANKRD26-like family C member 1A | 12 |                      | QMPKYSSSENSNPEQDLK            | 481  | 17 | 7  | 37.18  | b4*b4y9y10°y10y11*y11                                                          | 1994.90 | 79.080  | 12580   | 2 | 997.95  | -6.00  |
| Q6S8J3 A26CA_HUMAN ANKRD26-like family C member 1A | 13 |                      | ESYVGKEAQSK                   | 750  | 11 | 5  | 36.27  | y5°y5y6*y6y7                                                                   | 1225.60 | 32.110  | 7473    | 2 | 613.30  | -6.47  |
| Q6S8J3 A26CA_HUMAN ANKRD26-like family C member 1A | 14 |                      | QEYDESGPSIVHRK                | 1059 | 14 | 11 | 127.05 | b10°b10y3y4y5y6y7y8y9y10y12                                                    | 1644.79 | 38.013  | 7357    | 3 | 548.93  | -4.45  |

|                                                     |    |                       |                                     |      |    |    |        |                                              |         |         |        |   |         |        |
|-----------------------------------------------------|----|-----------------------|-------------------------------------|------|----|----|--------|----------------------------------------------|---------|---------|--------|---|---------|--------|
| [Q6S8J3]A26CA_HUMAN ANKRD26-like family C member 1A | 15 |                       | GYRFTTMAER                          | 896  | 10 | 5  | 40.42  | b7y6y7y9°y9                                  | 1231.58 | 68.508  | 5530   | 2 | 616.29  | -9.52  |
| [Q6S8J3]A26CA_HUMAN ANKRD26-like family C member 1A | 16 |                       | EKMTQIMFETFNTPAMYVAIQAV<br>PSLYTSGR | 816  | 31 | 4  | 16.32  | b3b5b10y16                                   | 3524.69 | 114.349 | 5065   | 3 | 1175.57 | -9.70  |
| [Q6S8J3]A26CA_HUMAN ANKRD26-like family C member 1A | 17 |                       | EKDVLHENSTLR                        | 640  | 12 | 4  | 34.53  | b3b4b11y8                                    | 1440.73 | 74.996  | 4546   | 2 | 720.87  | -11.01 |
| [Q6S8J3]A26CA_HUMAN ANKRD26-like family C member 1A | 18 |                       | YSSENSNPEQDLKLTSEESQR               | 485  | 22 | 9  | 35.39  | b11b14°b14b16°b16b17°<br>b17y10y13           | 2570.19 | 136.826 | 4100   | 2 | 1285.60 | 14.53  |
| [Q6S8J3]A26CA_HUMAN ANKRD26-like family C member 1A | 19 |                       | ELENFMAIEEMKK                       | 531  | 13 | 8  | 55.21  | b8*b8b9b12°b12y5y7y9                         | 1611.77 | 95.147  | 3044   | 2 | 806.39  | -3.71  |
| [Q6S8J3]A26CA_HUMAN ANKRD26-like family C member 1A | 20 |                       | S RTPENQQFPDNESEYHR                 | 451  | 19 | 3  | 15.08  | b4b6y3                                       | 2363.04 | 101.151 | 2603   | 3 | 788.35  | 5.27   |
| [Q6S8J3]A26CA_HUMAN ANKRD26-like family C member 1A | 21 |                       | KDLYTNTVLSGGTTMYPGMAHR              | 990  | 22 | 3  | 13.56  | b15y8y13                                     | 2413.19 | 84.473  | 2565   | 3 | 805.07  | 12.75  |
| [Q6S8J3]A26CA_HUMAN ANKRD26-like family C member 1A | 22 |                       | ISSENSNPEQELKLTSEESQR               | 367  | 22 | 5  | 24.43  | b16b17*b17b19y10                             | 2534.17 | 136.835 | 2074   | 2 | 1267.59 | -4.53  |
| [Q6S8J3]A26CA_HUMAN ANKRD26-like family C member 1A | 23 | Carbamidomethyl+C(16) | QIEVVEKMNSELSLCK                    | 622  | 17 | 3  | 23.88  | y5y7y9                                       | 1994.01 | 64.650  | 2031   | 3 | 665.34  | 6.00   |
| [Q6S8J3]A26CA_HUMAN ANKRD26-like family C member 1A | 24 |                       | SQEPEINKDGDR                        | 519  | 12 | 3  | 22.47  | b6y4y7                                       | 1387.66 | 51.950  | 1506   | 2 | 694.33  | 8.71   |
| [Q6S8J3]A26CA_HUMAN ANKRD26-like family C member 1A | 25 | Phosphoryl STY(17)    | HGSTHVGFPENLTNGATAGNGDD<br>GLIPPR   | 544  | 29 | 3  | 17.56  | y8y11y14                                     | 2981.38 | 129.748 | 3894   | 3 | 994.46  | 10.32  |
| [Q6S8J3]A26CA_HUMAN ANKRD26-like family C member 1A | 26 | Phosphoryl STY()      | YSVWVGGSILASLSTFQQMWISK             | 1036 | 23 | 7  | 44.02  | b7b8b9b15b17°b17y8                           | 2668.25 | 80.543  | 3347   | 4 | 667.82  | -9.88  |
| [Q6S8J3]A26CA_HUMAN ANKRD26-like family C member 1A | 27 | Oxidation+M()         | MTQIMFETFNTPAMYVAIQAVPSL<br>YTSGR   | 818  | 29 | 5  | 17.06  | b9y5°y5y8y12                                 | 3283.63 | 78.258  | 208003 | 4 | 821.66  | 12.71  |
| [Q6S8J3]A26CA_HUMAN ANKRD26-like family C member 1A | 28 | Oxidation+M()         | ELENFMAIEEMKK                       | 531  | 13 | 5  | 32.58  | b9y9y11y12°y12                               | 1627.76 | 83.216  | 5575   | 2 | 814.38  | -9.52  |
| [Q6S8J3]A26CA_HUMAN ANKRD26-like family C member 1A | 29 | Oxidation+M()         | KDLYTNTVLSGGTTMYPGMAHR              | 990  | 22 | 3  | 13.56  | b4b15y16                                     | 2429.15 | 79.063  | 1826   | 2 | 1215.08 | -3.72  |
| [Q71U36]TBA1A_HUMAN Tubulin alpha-1A chain          | 1  |                       | VGINYQPPTVVPGDLAK                   | 352  | 18 | 12 | 60.45  | b3b6°b6b10b11°b11y2y<br>3y7y8y12y18          | 1824.99 | 66.098  | 328422 | 2 | 913.00  | 3.14   |
| [Q71U36]TBA1A_HUMAN Tubulin alpha-1A chain          | 2  |                       | AVFVDLEPTVIDEVR                     | 64   | 15 | 14 | 128.04 | b1b3b5b6b7y2y3y5y8y1<br>0y11y12y13y15        | 1701.91 | 84.859  | 192667 | 2 | 851.46  | 1.51   |
| [Q71U36]TBA1A_HUMAN Tubulin alpha-1A chain          | 3  |                       | NLDIERPTYTNLNR                      | 215  | 14 | 15 | 63.46  | b2*b2b3b5b10y2y4*y4y<br>7y8*y8y12°y12*y12y14 | 1718.86 | 53.199  | 137824 | 3 | 573.63  | -11.36 |
| [Q71U36]TBA1A_HUMAN Tubulin alpha-1A chain          | 4  |                       | DVNAAIATIK                          | 326  | 10 | 5  | 39.63  | b3b7y3y8y10                                  | 1015.58 | 52.681  | 66381  | 2 | 508.29  | -0.54  |
| [Q71U36]TBA1A_HUMAN Tubulin alpha-1A chain          | 5  |                       | EDMAALEK                            | 422  | 8  | 6  | 24.78  | b2b4°y2y4y5y8                                | 906.42  | 36.896  | 49769  | 2 | 453.71  | -6.53  |

|                                           |    |                                     |                              |      |    |    |        |                                                                           |         |         |        |   |         |        |
|-------------------------------------------|----|-------------------------------------|------------------------------|------|----|----|--------|---------------------------------------------------------------------------|---------|---------|--------|---|---------|--------|
| Q71U36 TBA1A_HUMAN Tubulin alpha-1A chain | 6  |                                     | FDGALNVDLTEFQTNLVPYPR        | 243  | 21 | 15 | 83.88  | b1b2b3b5b11b16y2y3y4y5y6y11*y11y14y21                                     | 2409.24 | 95.365  | 45212  | 2 | 1205.12 | 11.86  |
| Q71U36 TBA1A_HUMAN Tubulin alpha-1A chain | 7  |                                     | LSVDYGKK                     | 156  | 8  | 8  | 62.93  | b2b4y1y3y4y5y7y8                                                          | 909.50  | 29.946  | 28802  | 2 | 455.25  | -5.97  |
| Q71U36 TBA1A_HUMAN Tubulin alpha-1A chain | 8  |                                     | GHYTIKGEIIDLVLDR             | 105  | 16 | 4  | 25.03  | b5b7b11y16                                                                | 1842.03 | 98.567  | 15528  | 2 | 921.52  | 8.15   |
| Q71U36 TBA1A_HUMAN Tubulin alpha-1A chain | 9  |                                     | FDLMYAK                      | 394  | 7  | 4  | 50.99  | b4y3y4y6                                                                  | 887.44  | 119.598 | 1608   | 1 | 887.44  | 11.90  |
| Q71U36 TBA1A_HUMAN Tubulin alpha-1A chain | 10 | Carbamidomethyl+C(15);Oxidation+M() | AYHEQLSVAEITNACFEPANQMV<br>K | 280  | 24 | 5  | 39.9   | b3b13y11y12y13                                                            | 2766.31 | 104.504 | 1515   | 3 | 922.78  | 9.53   |
| Q7Z406 MYH14_HUMAN Myosin-14              | 1  |                                     | QLLQANPILEAFGNAK             | 236  | 16 | 27 | 168.34 | b2*b2b3*b3b4*b4b6*b6b15y2y4*y4y5y6y7*y7*y7y8*y8y10y11y12y13*y13y14y16*y16 | 1726.95 | 91.836  | 186854 | 2 | 863.98  | 2.40   |
| Q7Z406 MYH14_HUMAN Myosin-14              | 2  |                                     | AMEAEAAGLREQLLEEEAAR         | 1356 | 20 | 7  | 41.26  | y1y5y8y9y11y16y20                                                         | 2145.01 | 58.855  | 84660  | 3 | 715.67  | -7.63  |
| Q7Z406 MYH14_HUMAN Myosin-14              | 3  |                                     | LAQAEEQLEQETR                | 1839 | 13 | 6  | 20.83  | b6*b6*b6b9y5y13                                                           | 1544.75 | 51.605  | 65854  | 2 | 772.88  | -1.98  |
| Q7Z406 MYH14_HUMAN Myosin-14              | 4  |                                     | RDLGEELEALR                  | 1158 | 11 | 4  | 24.51  | b8y5y10y11                                                                | 1300.68 | 54.384  | 58283  | 2 | 650.84  | -4.50  |
| Q7Z406 MYH14_HUMAN Myosin-14              | 5  |                                     | KEELQAALAR                   | 1104 | 11 | 10 | 117.33 | b3b4b8b10y4y5y7y9y10y11                                                   | 1257.68 | 43.213  | 55663  | 2 | 629.34  | -1.75  |
| Q7Z406 MYH14_HUMAN Myosin-14              | 6  | Carbamidomethyl+C(1)                | CNGVLEGIR                    | 717  | 9  | 10 | 76.63  | b2*b2b4b8y1y3y4y5y7y9                                                     | 1017.51 | 49.428  | 37205  | 2 | 509.26  | -4.26  |
| Q7Z406 MYH14_HUMAN Myosin-14              | 7  |                                     | LMATLSNTNPSFVR               | 680  | 14 | 5  | 19.46  | b5b13*b13y3y14                                                            | 1550.81 | 92.808  | 36070  | 3 | 517.61  | 7.87   |
| Q7Z406 MYH14_HUMAN Myosin-14              | 8  |                                     | ELEDVTEAESMNREVTTLR          | 1922 | 20 | 7  | 14.51  | b2b3*b3y2y11y15y20                                                        | 2309.09 | 62.854  | 9852   | 3 | 770.37  | 0.85   |
| Q7Z406 MYH14_HUMAN Myosin-14              | 9  |                                     | TLEEETR                      | 1198 | 7  | 5  | 40.7   | b3*b3b6y5y7                                                               | 877.42  | 33.513  | 8103   | 2 | 439.21  | -7.72  |
| Q7Z406 MYH14_HUMAN Myosin-14              | 10 |                                     | ELQTAQAQLSEWR                | 1381 | 13 | 5  | 20.83  | b7b11*b11y9*y9                                                            | 1559.78 | 72.754  | 7492   | 2 | 780.39  | -2.19  |
| Q7Z406 MYH14_HUMAN Myosin-14              | 11 |                                     | KEPGVPGELER                  | 225  | 11 | 3  | 24.51  | b6y5y9                                                                    | 1210.63 | 37.393  | 6663   | 2 | 605.82  | -12.70 |
| Q7Z406 MYH14_HUMAN Myosin-14              | 12 |                                     | HEVPPHYAVTEGAYR              | 167  | 16 | 4  | 17.33  | b14*b14y3y11                                                              | 1824.89 | 61.335  | 5340   | 2 | 912.95  | -8.70  |
| Q7Z406 MYH14_HUMAN Myosin-14              | 13 |                                     | VLGFSHEEHSMLR                | 353  | 14 | 4  | 33.28  | b10b12y9y10                                                               | 1630.86 | 136.781 | 4858   | 1 | 1630.86 | -3.29  |
| Q7Z406 MYH14_HUMAN Myosin-14              | 14 |                                     | ELSSTEAQLHDAQELLQEETR        | 1325 | 21 | 4  | 14     | b12y3*y3y8                                                                | 2427.13 | 136.218 | 2416   | 3 | 809.72  | -12.88 |
| Q7Z406 MYH14_HUMAN Myosin-14              | 15 |                                     | QLEEAEEEASR                  | 1901 | 11 | 6  | 27.52  | b3b4*b4*b4y10y11                                                          | 1290.59 | 136.255 | 2241   | 1 | 1290.59 | 10.50  |
| Q7Z406 MYH14_HUMAN Myosin-14              | 16 |                                     | VQELQQSAREVGLQGR             | 880  | 18 | 6  | 23.13  | b1b2b13b14*b14y13                                                         | 2055.03 | 105.378 | 1964   | 2 | 1028.02 | -12.24 |
| Q7Z406 MYH14_HUMAN Myosin-14              | 17 |                                     | GPSAGGGPGSGTSPQVEWTAR        | 32   | 21 | 12 | 59.59  | b5b18*b18y5y11y12y15*y15y16y19*y19*y19                                    | 1955.90 | 69.610  | 178957 | 3 | 652.64  | -11.30 |
| Q7Z406 MYH14_HUMAN Myosin-14              | 18 |                                     | ELFQETLES LR                 | 342  | 11 | 3  | 24.51  | b5b7y8                                                                    | 1364.68 | 42.634  | 152881 | 3 | 455.57  | -15.47 |
| Q7Z406 MYH14_HUMAN Myosin-14              | 19 |                                     | AQLLK                        | 1123 | 5  | 2  | 26.6   | y3y4                                                                      | 572.38  | 44.556  | 46840  | 1 | 572.38  | 5.65   |
| Q7Z406 MYH14_HUMAN Myosin-14              | 20 |                                     | AGVLAQLEEER                  | 788  | 11 | 7  | 55.88  | b6*b6b7y3y4*y4y5                                                          | 1214.66 | 80.131  | 38933  | 2 | 607.84  | 20.80  |
| Q7Z406 MYH14_HUMAN Myosin-14              | 21 |                                     | EAQAALAEAQEDLESER            | 1131 | 17 | 3  | 16.47  | b9b13y5                                                                   | 1859.82 | 78.374  | 28550  | 2 | 930.41  | -21.79 |
| Q7Z406 MYH14_HUMAN Myosin-14              | 22 | Carbamidomethyl+C(8)                | ADLLLEPCSHYR                 | 316  | 12 | 3  | 32.68  | y3y8y10                                                                   | 1473.72 | 31.087  | 19778  | 3 | 491.91  | 3.06   |

|                              |    |                       |                            |      |    |    |       |                                       |         |         |       |   |         |        |
|------------------------------|----|-----------------------|----------------------------|------|----|----|-------|---------------------------------------|---------|---------|-------|---|---------|--------|
| Q7Z406 MYH14_HUMAN Myosin-14 | 23 |                       | QIQELR                     | 1809 | 6  | 1  | 13.7  | y3                                    | 786.45  | 47.847  | 14696 | 2 | 393.73  | 2.25   |
| Q7Z406 MYH14_HUMAN Myosin-14 | 24 |                       | AELSSLQTAR                 | 1254 | 10 | 4  | 34.11 | b4*b4b8b9                             | 1075.57 | 40.129  | 11670 | 2 | 538.29  | -5.79  |
| Q7Z406 MYH14_HUMAN Myosin-14 | 25 |                       | DEGEEEAUEVELAESGR          | 71   | 16 | 3  | 25.7  | y7y9y10                               | 1748.78 | 97.832  | 11161 | 3 | 583.60  | 17.73  |
| Q7Z406 MYH14_HUMAN Myosin-14 | 26 |                       | LEGELEELK                  | 1638 | 9  | 3  | 30.7  | b3y6y8                                | 1059.56 | 63.799  | 9264  | 2 | 530.28  | 4.61   |
| Q7Z406 MYH14_HUMAN Myosin-14 | 27 |                       | LDGESSELQEQMVEQQQR         | 1076 | 18 | 6  | 23.13 | b8*b8y3*y3y4*y4                       | 2133.99 | 108.753 | 5271  | 2 | 1067.50 | 7.09   |
| Q7Z406 MYH14_HUMAN Myosin-14 | 28 |                       | QLPIYTEAIVEMYR             | 149  | 14 | 5  | 27.25 | b3*b3b4b12*b12                        | 1725.91 | 114.320 | 5198  | 3 | 575.97  | 10.68  |
| Q7Z406 MYH14_HUMAN Myosin-14 | 29 |                       | LGQLEEELEEEQSNSELLNDR      | 1754 | 21 | 7  | 27.04 | b8b10*b10b12*b12y4y9                  | 2474.20 | 110.933 | 4489  | 3 | 825.41  | 20.92  |
| Q7Z406 MYH14_HUMAN Myosin-14 | 30 |                       | VAEQAANDLR                 | 1552 | 10 | 5  | 27.12 | b7*b7y7y9*y9                          | 1086.54 | 72.083  | 3534  | 2 | 543.78  | -10.11 |
| Q7Z406 MYH14_HUMAN Myosin-14 | 31 |                       | QMQTEK                     | 956  | 6  | 1  | 13.7  | y5                                    | 764.37  | 26.850  | 3345  | 1 | 764.37  | 9.82   |
| Q7Z406 MYH14_HUMAN Myosin-14 | 32 |                       | AQAELEENVSGALNEAESK        | 1301 | 18 | 7  | 35.15 | b5°b5*b5b11°b11b13b15                 | 1859.90 | 58.494  | 3200  | 3 | 620.64  | 2.89   |
| Q7Z406 MYH14_HUMAN Myosin-14 | 33 |                       | AQVTELEDELTAEDAK           | 1562 | 17 | 5  | 30.15 | b3b8*b8y6y7                           | 1832.89 | 66.823  | 2902  | 3 | 611.64  | 8.26   |
| Q7Z406 MYH14_HUMAN Myosin-14 | 34 |                       | NMDPLNDNV AALLHQSTDR       | 613  | 19 | 4  | 15.08 | b9y7y10*y10                           | 2124.00 | 103.891 | 2473  | 3 | 708.67  | -5.06  |
| Q7Z406 MYH14_HUMAN Myosin-14 | 35 |                       | RHEVPPHVYAVTEGAYR          | 166  | 17 | 9  | 43.16 | b6b9°b9y3y5y6°y6y8°y8                 | 1981.03 | 72.902  | 31472 | 2 | 991.02  | 11.83  |
| Q7Z406 MYH14_HUMAN Myosin-14 | 36 | Carbamidomethyl+C(2)  | LCRLGLGVTDFSR              | 399  | 14 | 4  | 19.46 | b3y6°y6y10                            | 1606.87 | 59.241  | 24499 | 3 | 536.30  | -1.90  |
| Q7Z406 MYH14_HUMAN Myosin-14 | 37 |                       | ELEDVTEAESMNREVTTLR        | 1922 | 20 | 3  | 21.3  | y11y13y16                             | 2309.07 | 90.127  | 11761 | 2 | 1155.04 | -11.74 |
| Q7Z406 MYH14_HUMAN Myosin-14 | 38 |                       | LQRAQAELEENVSGALNEAESK     | 1298 | 21 | 10 | 54.96 | y3y5y9°y9y11y12°y12*y12y13°y13        | 2257.13 | 105.416 | 11425 | 3 | 753.05  | -4.65  |
| Q7Z406 MYH14_HUMAN Myosin-14 | 39 |                       | HEVPPHVYAVTEGAYRSMQLQDR    | 167  | 22 | 11 | 94.87 | b4b6b8b9b11b13b17b18y3y4y6            | 2555.24 | 108.814 | 10098 | 3 | 852.42  | -0.96  |
| Q7Z406 MYH14_HUMAN Myosin-14 | 40 |                       | QEEEGALEAGEEARR            | 1396 | 16 | 4  | 17.33 | b6b9*b9y8                             | 1744.83 | 50.315  | 9438  | 2 | 872.92  | 13.78  |
| Q7Z406 MYH14_HUMAN Myosin-14 | 41 |                       | AQELQKVQELQQSAR            | 874  | 16 | 4  | 23.86 | b4y9y10°y10                           | 1884.00 | 102.775 | 6478  | 2 | 942.51  | 5.90   |
| Q7Z406 MYH14_HUMAN Myosin-14 | 42 |                       | EEIFSQNRESEK               | 1685 | 12 | 5  | 22.47 | b8°b8*b8y9y11                         | 1495.71 | 37.868  | 6126  | 2 | 748.36  | 7.43   |
| Q7Z406 MYH14_HUMAN Myosin-14 | 43 |                       | QGFPNRILQEFR               | 729  | 13 | 3  | 25.6  | b10b11y5                              | 1651.88 | 99.341  | 5317  | 2 | 826.44  | 3.62   |
| Q7Z406 MYH14_HUMAN Myosin-14 | 44 | Carbamidomethyl+C(13) | SMLQDREDQSILCTGESGAGK      | 183  | 21 | 3  | 14    | b4b6y6                                | 2282.03 | 37.974  | 4955  | 3 | 761.35  | -3.21  |
| Q7Z406 MYH14_HUMAN Myosin-14 | 45 |                       | AELSSLQTARQEGEQR           | 1254 | 16 | 13 | 72    | b5°b5b8°b8b11b12°b12b13y6y7°y7y10*y10 | 1802.89 | 107.105 | 4772  | 2 | 901.95  | -6.36  |
| Q7Z406 MYH14_HUMAN Myosin-14 | 46 | Carbamidomethyl+C(8)  | ADLLEPCSHYRFLTNGPSSSPGQER  | 316  | 26 | 5  | 12.23 | b3°b3b12°b12y11                       | 2931.42 | 84.492  | 4249  | 3 | 977.81  | 5.75   |
| Q7Z406 MYH14_HUMAN Myosin-14 | 47 |                       | SRASISYGSNMRPQSQTWR        | 1038 | 19 | 7  | 23.88 | b6b11*b11b13y9°y9*y9                  | 2212.04 | 136.263 | 4178  | 2 | 1106.52 | -13.80 |
| Q7Z406 MYH14_HUMAN Myosin-14 | 48 |                       | QLEEAEEEASRAQAGR           | 1901 | 16 | 3  | 17.33 | b4b12y14                              | 1773.84 | 106.948 | 3640  | 2 | 887.43  | 4.89   |
| Q7Z406 MYH14_HUMAN Myosin-14 | 49 |                       | DLGEELEALRGELEDTLTSTNAQQLR | 1159 | 27 | 4  | 11.99 | b6y3°y3y9                             | 3044.48 | 116.702 | 3218  | 3 | 1015.50 | 3.29   |
| Q7Z406 MYH14_HUMAN Myosin-14 | 50 |                       | AVEERER                    | 1483 | 7  | 3  | 40.7  | b3b5y5                                | 888.44  | 108.759 | 2692  | 1 | 888.44  | -9.62  |
| Q7Z406 MYH14_HUMAN Myosin-14 | 51 | Carbamidomethyl+C(6)  | QAKDECSFHIFYQLLGAGEQLK     | 293  | 23 | 4  | 24    | b4b13b14y22                           | 2639.27 | 88.972  | 2238  | 2 | 1320.14 | -6.66  |

|                                         |    |                       |                                 |      |    |   |       |                             |         |         |       |   |         |        |
|-----------------------------------------|----|-----------------------|---------------------------------|------|----|---|-------|-----------------------------|---------|---------|-------|---|---------|--------|
| Q7Z406 MYH14_HUMAN Myosin-14            | 52 |                       | GLEAEVLRQLQEELAASDR             | 1700 | 18 | 5 | 15.73 | b3y8y10°y10*y10             | 1999.02 | 120.895 | 2200  | 2 | 1000.01 | -13.62 |
| Q7Z406 MYH14_HUMAN Myosin-14            | 53 |                       | DQIQRMNPPK                      | 93   | 10 | 6 | 52.93 | b3b9*b9y4y5y8               | 1226.63 | 32.116  | 1927  | 3 | 409.55  | 1.59   |
| Q7Z406 MYH14_HUMAN Myosin-14            | 54 | Phosphoryl STY(20)    | FLTNGPSSSPGQERELFQETLES LR      | 328  | 25 | 6 | 27.67 | b10_H3PO4<br>b10y3y5y7y9°y9 | 2902.37 | 40.031  | 2454  | 6 | 484.57  | 5.22   |
| Q7Z406 MYH14_HUMAN Myosin-14            | 55 | Phosphoryl STY(8)     | QELELVVSELEAR                   | 934  | 13 | 5 | 29.94 | b5*b5b8y3y5                 | 1594.75 | 36.822  | 2119  | 3 | 532.26  | -6.81  |
| Q7Z406 MYH14_HUMAN Myosin-14            | 56 | Oxidation+M(3)        | AQMASAGQGK                      | 1647 | 10 | 3 | 27.12 | b3y5y7                      | 964.45  | 28.905  | 14595 | 2 | 482.73  | 3.16   |
| Q7Z406 MYH14_HUMAN Myosin-14            | 57 | Oxidation+M(2)        | LMATLSNTNPSFVR                  | 680  | 14 | 3 | 24.9  | b9b10y10                    | 1566.78 | 61.216  | 13877 | 2 | 783.89  | -9.27  |
| Q7Z406 MYH14_HUMAN Myosin-14            | 58 | Oxidation+M(12)       | ELEDVTEAESMNREVTTLR             | 1922 | 20 | 3 | 22.64 | b6b7y11                     | 2325.11 | 112.863 | 2804  | 3 | 775.71  | 9.35   |
| Q7Z406 MYH14_HUMAN Myosin-14            | 59 | Oxidation+M(2)        | AMEAEAAGLREQLEEEAAARER          | 1356 | 22 | 3 | 13.56 | b15y4y12                    | 2446.16 | 70.045  | 2191  | 2 | 1223.58 | -0.40  |
| Q7Z406 MYH14_HUMAN Myosin-14            | 60 | Oxidation+M(15)       | LQRELEDVTEAESMNREVTTLR          | 1919 | 23 | 3 | 13.16 | b11y12y14                   | 2722.30 | 103.985 | 1813  | 3 | 908.10  | -12.38 |
| Q7Z406 MYH14_HUMAN Myosin-14            | 61 | Oxidation+M(1)        | MQAQMKELWREVEETR                | 1666 | 16 | 5 | 42.3  | b9b10y7y11y12               | 2080.01 | 112.195 | 1548  | 2 | 1040.51 | 5.99   |
| Q7Z406 MYH14_HUMAN Myosin-14            | 62 |                       | LSSTEAQLHDAQELLQEETR            | 1326 | 20 | 2 | 12.74 | b6b10                       | 2298.09 | 136.270 | 2989  | 2 | 1149.55 | -11.58 |
| Q7Z406 MYH14_HUMAN Myosin-14            | 63 |                       | LEEAEAEASR                      | 1902 | 10 | 0 | 2.38  |                             | 1162.53 | 136.303 | 2753  | 1 | 1162.53 | 8.72   |
| Q80930 VE2_HP V50 Regulatory protein E2 | 1  | Carbamidomethyl+C(13) | SDFGSEPWTLSECSLEMLNAPPR         | 90   | 23 | 8 | 42.4  | b8b10y10y11*y11y12y15y23    | 2623.21 | 121.837 | 43417 | 3 | 875.08  | 13.03  |
| Q80930 VE2_HP V50 Regulatory protein E2 | 2  |                       | QPFTVTVQFDNDPK                  | 118  | 14 | 9 | 58.7  | b6°b6b8b9*b9y7y8y9y14       | 1635.80 | 62.240  | 32268 | 2 | 818.40  | -0.97  |
| Q80930 VE2_HP V50 Regulatory protein E2 | 3  |                       | MTQMETQETLSAR                   | 0    | 13 | 4 | 28.31 | b8b10°b10b11                | 1525.71 | 41.296  | 18323 | 3 | 509.24  | 10.72  |
| Q80930 VE2_HP V50 Regulatory protein E2 | 4  |                       | ALQDTEPPTSTSTVR                 | 240  | 15 | 6 | 37.43 | b10b11*b11b13y6y12          | 1602.81 | 61.333  | 7929  | 3 | 534.94  | 8.91   |
| Q80930 VE2_HP V50 Regulatory protein E2 | 5  |                       | SAFGPADEQPGPSTSYDK              | 210  | 18 | 3 | 15.73 | b6y5y11                     | 1853.80 | 43.966  | 4092  | 2 | 927.41  | -8.69  |
| Q80930 VE2_HP V50 Regulatory protein E2 | 6  |                       | NTTYSMGHLDL                     | 384  | 12 | 4 | 22.47 | b11y3y11y12                 | 1338.58 | 125.535 | 1875  | 1 | 1338.58 | -12.31 |
| Q80930 VE2_HP V50 Regulatory protein E2 | 7  |                       | EHHSYR                          | 263  | 6  | 3 | 27    | y4y5°y5                     | 828.37  | 57.431  | 21809 | 2 | 414.69  | -1.03  |
| Q80930 VE2_HP V50 Regulatory protein E2 | 8  |                       | SQSELGADSAPTPEEVGR              | 272  | 18 | 5 | 31.3  | b5b11b15y6y10               | 1829.84 | 52.750  | 2222  | 2 | 915.42  | -5.47  |
| Q80930 VE2_HP V50 Regulatory protein E2 | 9  |                       | EVTGDSVYFK                      | 167  | 10 | 4 | 27.12 | b4b7y9°y9                   | 1144.55 | 119.716 | 1872  | 1 | 1144.55 | -2.45  |
| Q80930 VE2_HP V50 Regulatory protein E2 | 10 |                       | LQEEAR                          | 305  | 6  | 1 | 13.7  | b5                          | 745.38  | 59.093  | 1659  | 2 | 373.19  | -7.37  |
| Q80930 VE2_HP V50 Regulatory protein E2 | 11 |                       | WLGPKSEGYR                      | 348  | 10 | 3 | 28.88 | b8y7y8                      | 1192.61 | 89.520  | 6494  | 2 | 596.81  | 0.92   |
| Q80930 VE2_HP V50 Regulatory protein E2 | 12 |                       | SEGYRGDAK                       | 353  | 9  | 6 | 65.09 | b3y3°y3y4y6y8               | 982.46  | 72.827  | 5148  | 1 | 982.46  | 6.15   |
| Q80930 VE2_HP V50 Regulatory protein E2 | 13 |                       | NLKDHDYWESMR                    | 30   | 13 | 6 | 32.58 | b8b9°b9b11°b11y12           | 1706.79 | 136.766 | 5142  | 1 | 1706.79 | -1.14  |
| Q80930 VE2_HP V50 Regulatory protein E2 | 14 |                       | LSFLNTVGLPKNTTYSMGHLDL          | 373  | 23 | 4 | 19.57 | y4y12y16°y16                | 2508.28 | 100.419 | 4417  | 2 | 1254.65 | 0.97   |
| Q80930 VE2_HP V50 Regulatory protein E2 | 15 | Carbamidomethyl+C(21) | QPFTVTVQFDNDPKNVYPYICYEYIYYQDDR | 118  | 31 | 4 | 21.96 | b10b13b14y3                 | 3953.77 | 84.526  | 2997  | 4 | 989.20  | -6.85  |
| Q80930 VE2_HP V50 Regulatory protein E2 | 16 |                       | SGSGQPKALQDTEPPTSTSTVR          | 233  | 22 | 5 | 21.07 | b3b8b11°b11y11              | 2244.12 | 112.984 | 1727  | 2 | 1122.56 | 4.79   |
| Q80930 VE2_HP V50 Regulatory protein E2 | 17 |                       | SQSELGADSAPTPEEVGR              | 272  | 19 | 3 | 15.08 | b12y12y14                   | 1985.95 | 105.388 | 1723  | 2 | 993.48  | 0.98   |



|                                             |    |                                             |                                |     |    |    |        |                                    |         |         |        |   |         |        |
|---------------------------------------------|----|---------------------------------------------|--------------------------------|-----|----|----|--------|------------------------------------|---------|---------|--------|---|---------|--------|
| Q80930 VE2_HP V50 Regulatory protein E2     | 18 | Phosphoryl STY(9)                           | GLVDHNGLYFKEVTGDSVYFK          | 156 | 21 | 6  | 36.62  | b3b10b11b14y4y12                   | 2468.14 | 136.277 | 1927   | 3 | 823.39  | 0.40   |
| Q86UX7 URP2_HUMAN Fermitin family homolog 3 | 1  |                                             | VVLAGGVAPALFR                  | 166 | 13 | 14 | 134.73 | b2b3b4b6y1y4y5y6y7y8y9y10y11y13    | 1269.77 | 77.937  | 186947 | 2 | 635.39  | 0.96   |
| Q86UX7 URP2_HUMAN Fermitin family homolog 3 | 2  |                                             | LEGSAPTDVLDLSTTIPELKDHLR       | 333 | 24 | 7  | 32.91  | b8b11y3y6y8y19y24                  | 2620.35 | 89.302  | 133057 | 4 | 655.84  | -12.95 |
| Q86UX7 URP2_HUMAN Fermitin family homolog 3 | 3  |                                             | LLVPSPEGMSEIYLR                | 423 | 15 | 9  | 56     | b2b3y1y3y6y10y12y13y15             | 1703.91 | 86.211  | 123093 | 2 | 852.46  | 5.16   |
| Q86UX7 URP2_HUMAN Fermitin family homolog 3 | 4  |                                             | ILEAHQNVAQLSLAEAQLR            | 523 | 19 | 8  | 50.14  | b8*b8b9y1y6y7y8y19                 | 2104.14 | 66.296  | 105152 | 3 | 702.05  | -6.96  |
| Q86UX7 URP2_HUMAN Fermitin family homolog 3 | 5  | Carbamidomethyl+C(15)                       | ASFSQPLFQAVAAICR               | 113 | 16 | 15 | 130.36 | b3*b3b4*b4b5y2y3y4y5y6y7y8y9y11y16 | 1765.91 | 92.214  | 95097  | 2 | 883.46  | 4.22   |
| Q86UX7 URP2_HUMAN Fermitin family homolog 3 | 6  |                                             | EKEPEEELYDSLK                  | 153 | 13 | 5  | 32.58  | b10y3y4y6y13                       | 1608.76 | 56.971  | 59843  | 3 | 536.92  | -4.78  |
| Q86UX7 URP2_HUMAN Fermitin family homolog 3 | 7  |                                             | AGDALWLR                       | 242 | 8  | 7  | 64.69  | b6b7y2y3y5y6y8                     | 901.48  | 62.169  | 54843  | 2 | 451.24  | -9.55  |
| Q86UX7 URP2_HUMAN Fermitin family homolog 3 | 8  | Carbamidomethyl+C(2)                        | GCEVVPDVNVSGQK                 | 405 | 14 | 9  | 62.59  | b2b3b4y4*y4y5y9y10y14              | 1487.72 | 48.599  | 50408  | 2 | 744.36  | 4.35   |
| Q86UX7 URP2_HUMAN Fermitin family homolog 3 | 9  |                                             | LEGSAPTDVLDLSTTIPELK           | 333 | 20 | 6  | 23.93  | b2y2y4y5y15y20                     | 2099.13 | 95.685  | 46692  | 2 | 1050.07 | 10.00  |
| Q86UX7 URP2_HUMAN Fermitin family homolog 3 | 10 |                                             | VFVGEEDEPEAESVTLR              | 19  | 16 | 6  | 14.44  | y1y2y9*y11*y11y14                  | 1776.87 | 60.554  | 45398  | 2 | 888.94  | 3.92   |
| Q86UX7 URP2_HUMAN Fermitin family homolog 3 | 11 |                                             | LTQLYEQAR                      | 267 | 9  | 5  | 30.7   | b6y5*y5y6y9                        | 1121.59 | 40.967  | 38076  | 2 | 561.30  | -5.33  |
| Q86UX7 URP2_HUMAN Fermitin family homolog 3 | 12 |                                             | LSQSGEVGEPAGTDPGLDLDVA LSNLEVK | 303 | 30 | 10 | 23.81  | b2b9y1y2y6y8y10*y10y16y30          | 3025.51 | 96.130  | 37550  | 3 | 1009.17 | 8.23   |
| Q86UX7 URP2_HUMAN Fermitin family homolog 3 | 13 |                                             | TMADSSYTSEVQAILAFLSLQR         | 459 | 22 | 10 | 75.77  | b2y2y3y4*y4y5y6y7y8y22             | 2431.22 | 120.516 | 22089  | 2 | 1216.12 | 2.41   |
| Q86UX7 URP2_HUMAN Fermitin family homolog 3 | 14 |                                             | TGSGGPGNHPHPDASAEGLNPY GLVAPR  | 481 | 29 | 12 | 99.56  | b12b21y3y4y5y6y7y8y9*y9y11y15      | 2782.31 | 59.889  | 147802 | 4 | 696.33  | -8.25  |
| Q86UX7 URP2_HUMAN Fermitin family homolog 3 | 15 |                                             | TASGDYIDSSWELR                 | 5   | 14 | 7  | 51.71  | b3b7b8y3y6y13*y13                  | 1599.76 | 71.425  | 102129 | 2 | 800.38  | 16.79  |
| Q86UX7 URP2_HUMAN Fermitin family homolog 3 | 16 |                                             | GEELDEDLFLQLTGGHEAF            | 648 | 19 | 4  | 26.1   | b18y6y11y12                        | 2120.01 | 101.304 | 60263  | 2 | 1060.51 | 14.05  |
| Q86UX7 URP2_HUMAN Fermitin family homolog 3 | 17 | Carbamidomethyl+C(16);Carbamidomethyl+C(21) | QVAIEFDEHINVAFSCVSASCR         | 607 | 22 | 3  | 13.56  | b18y5y10                           | 2539.16 | 81.875  | 51016  | 3 | 847.06  | -4.52  |
| Q86UX7 URP2_HUMAN Fermitin family homolog 3 | 18 |                                             | VTGESHIGGVLLK                  | 35  | 13 | 3  | 20.83  | b7b11y6                            | 1309.73 | 50.557  | 30953  | 3 | 437.25  | -14.63 |
| Q86UX7 URP2_HUMAN Fermitin family homolog 3 | 19 |                                             | FIQAWQLPDFGISYVMVR             | 542 | 19 | 4  | 20.92  | b4b6y6y8                           | 2257.14 | 47.522  | 23160  | 3 | 753.05  | -5.30  |
| Q86UX7 URP2_HUMAN Fermitin family homolog 3 | 20 |                                             | WLDSSR                         | 228 | 6  | 2  | 27     | y4y5                               | 763.37  | 35.423  | 8686   | 2 | 382.19  | -7.04  |
| Q86UX7 URP2_HUMAN Fermitin family homolog 3 | 21 |                                             | ETTLSYYK                       | 381 | 8  | 5  | 54.4   | b3b5y4*y4y7                        | 1004.50 | 46.407  | 7290   | 3 | 335.50  | 2.55   |
| Q86UX7 URP2_HUMAN Fermitin family homolog 3 | 22 | Carbamidomethyl+C(5)                        | WMAGCR                         | 447 | 6  | 2  | 27     | y4y5                               | 780.33  | 31.271  | 4148   | 2 | 390.67  | 4.22   |
| Q86UX7 URP2_HUMAN Fermitin family homolog 3 | 23 | Carbamidomethyl+C(18)                       | SQDEAPGDPIQLNLKGCEVVPD VNVSGQK | 389 | 30 | 4  | 22.05  | b14*b14b15y4                       | 3221.54 | 80.616  | 206809 | 4 | 806.14  | -11.75 |
| Q86UX7 URP2_HUMAN Fermitin family homolog 3 | 24 |                                             | LPRPSSLSDKTQLHSR               | 212 | 16 | 3  | 25.03  | y3y5y9                             | 1821.97 | 37.413  | 39622  | 4 | 456.25  | -11.72 |
| Q86UX7 URP2_HUMAN Fermitin family homolog 3 | 25 |                                             | AGMKTASGDYIDSSWELR             | 1   | 18 | 10 | 75.3   | b3b8b12b13b14y4y5y8*y8y12          | 1986.92 | 114.942 | 10829  | 3 | 662.98  | 0.49   |
| Q86UX7 URP2_HUMAN Fermitin family homolog 3 | 26 |                                             | ARGEELDEDLFLQLTGGHEAF          | 646 | 21 | 3  | 22.45  | b11b12y15                          | 2347.10 | 120.844 | 4995   | 2 | 1174.06 | -6.97  |
| Q86UX7 URP2_HUMAN Fermitin family homolog 3 | 27 |                                             | QWLLQTHWTLDKYGILADAR           | 70  | 20 | 5  | 37.96  | b11b13*b13b14b15                   | 2428.30 | 136.824 | 3052   | 2 | 1214.65 | 9.35   |

|                                             |    |                                           |                                    |     |    |    |        |                                                   |         |         |        |   |         |        |
|---------------------------------------------|----|-------------------------------------------|------------------------------------|-----|----|----|--------|---------------------------------------------------|---------|---------|--------|---|---------|--------|
| Q86UX7 URP2_HUMAN Fermitin family homolog 3 | 28 | Carbamidomethyl+C(15);Phosphoryl STY(4)   | ASFSQPLFQAVAAICR                   | 113 | 16 | 3  | 25.03  | y5y11y13                                          | 1845.84 | 107.449 | 9281   | 3 | 615.95  | -10.71 |
| Q86UX7 URP2_HUMAN Fermitin family homolog 3 | 29 | Phosphoryl STY(14)                        | FIQAWQSLPDFGISYVMVR                | 542 | 19 | 9  | 59.31  | b3b5*b5b12y4y7y11y12y14                           | 2337.09 | 90.958  | 6000   | 2 | 1169.05 | -5.22  |
| Q86UX7 URP2_HUMAN Fermitin family homolog 3 | 30 | Phosphoryl STY(25)                        | LSQSGEVGEPAGTDPGLDDLDVA<br>LSNLEVK | 303 | 30 | 4  | 26.48  | y5y7y8y13_H3PO4 y13                               | 3105.42 | 122.587 | 5266   | 4 | 777.11  | -6.05  |
| Q86UX7 URP2_HUMAN Fermitin family homolog 3 | 31 | Phosphoryl STY(10)                        | EPEEELYDL SK                       | 155 | 11 | 5  | 51.11  | b8b9y3y4y9                                        | 1431.58 | 25.920  | 4088   | 2 | 716.29  | -1.11  |
| Q9BQE3 TBA1C_HUMAN Tubulin alpha-1C chain   | 1  |                                           | VGINYQPPTVVPGGDLAK                 | 352 | 18 | 12 | 60.45  | b3b6*b6b10b11*b11y2y3y7y8y12y18                   | 1824.99 | 66.098  | 328422 | 2 | 913.00  | 3.14   |
| Q9BQE3 TBA1C_HUMAN Tubulin alpha-1C chain   | 2  |                                           | AVFVDLEPTVIDEVR                    | 64  | 15 | 14 | 128.04 | b1b3b5b6b7y2y3y5y8y10y11y12y13y15                 | 1701.91 | 84.859  | 192667 | 2 | 851.46  | 1.51   |
| Q9BQE3 TBA1C_HUMAN Tubulin alpha-1C chain   | 3  |                                           | NLDIERPTYTNLNR                     | 215 | 14 | 15 | 63.46  | b2*b2b3b5b10y2y4*y4y7y8*y8y12*y12*y12y14          | 1718.86 | 53.199  | 137824 | 3 | 573.63  | -11.36 |
| Q9BQE3 TBA1C_HUMAN Tubulin alpha-1C chain   | 4  |                                           | DVNAAIATIK                         | 326 | 10 | 5  | 39.63  | b3b7y3y8y10                                       | 1015.58 | 52.681  | 66381  | 2 | 508.29  | -0.54  |
| Q9BQE3 TBA1C_HUMAN Tubulin alpha-1C chain   | 5  |                                           | EDMAALEK                           | 422 | 8  | 6  | 24.78  | b2b4*y2y4y5y8                                     | 906.42  | 36.896  | 49769  | 2 | 453.71  | -6.53  |
| Q9BQE3 TBA1C_HUMAN Tubulin alpha-1C chain   | 6  |                                           | FDGALNVDLTEFQTNLVPYPR              | 243 | 21 | 15 | 83.88  | b1b2b3b5b11b16y2y3y4y5y6y11*y11y14y21             | 2409.24 | 95.365  | 45212  | 2 | 1205.12 | 11.86  |
| Q9BQE3 TBA1C_HUMAN Tubulin alpha-1C chain   | 7  |                                           | LSVDYGKK                           | 156 | 8  | 8  | 62.93  | b2b4y1y3y4y5y7y8                                  | 909.50  | 29.946  | 28802  | 2 | 455.25  | -5.97  |
| Q9BQE3 TBA1C_HUMAN Tubulin alpha-1C chain   | 8  |                                           | GHYTGKIEIDLVLDR                    | 105 | 16 | 4  | 25.03  | b5b7b11y16                                        | 1842.03 | 98.567  | 15528  | 2 | 921.52  | 8.15   |
| Q9BQE3 TBA1C_HUMAN Tubulin alpha-1C chain   | 9  |                                           | FDLMYAK                            | 394 | 7  | 4  | 50.99  | b4y3y4y6                                          | 887.44  | 119.598 | 1608   | 1 | 887.44  | 11.90  |
| Q9BQE3 TBA1C_HUMAN Tubulin alpha-1C chain   | 10 | Carbamidomethyl+C(4);Carbamidomethyl+C(5) | YMACCLLYR                          | 311 | 9  | 3  | 46.27  | y3y5y7                                            | 1249.56 | 61.550  | 42537  | 2 | 625.28  | 1.86   |
| Q9BQE3 TBA1C_HUMAN Tubulin alpha-1C chain   | 11 | Carbamidomethyl+C(8)                      | TIQFVDWCPTGFK                      | 339 | 13 | 3  | 20.83  | b8b10y9                                           | 1598.76 | 56.103  | 24339  | 2 | 799.88  | -7.48  |
| Q9BQE3 TBA1C_HUMAN Tubulin alpha-1C chain   | 12 |                                           | LISQIVSSITASLR                     | 229 | 14 | 5  | 38.72  | b4*b4b5y5y6                                       | 1487.89 | 100.532 | 13691  | 2 | 744.45  | 6.73   |
| Q9BQE3 TBA1C_HUMAN Tubulin alpha-1C chain   | 13 | Carbamidomethyl+C(3);Oxidation+M(4)       | AVCMLSNTTAVAEAWAR                  | 373 | 17 | 4  | 26.39  | b10y4y6y13                                        | 1866.89 | 59.202  | 31055  | 2 | 933.95  | 5.23   |
| Q9BQE3 TBA1C_HUMAN Tubulin alpha-1C chain   | 14 | Carbamidomethyl+C(15);Oxidation+M(22)     | AYHEQLTVAEITNACFEPANQMV<br>K       | 280 | 24 | 4  | 17.06  | b6b13y7y12                                        | 2780.34 | 85.185  | 4739   | 3 | 927.45  | 13.00  |
| Q9BQE3 TBA1C_HUMAN Tubulin alpha-1C chain   | 15 |                                           | EDMAALEK                           | 422 | 8  | 1  | 9.72   | y3                                                | 888.41  | 36.925  | 5458   | 2 | 444.71  | 3.78   |
| Q9BUF5 TBB6_HUMAN Tubulin beta-6 chain      | 1  |                                           | LAVNMVPPFR                         | 252 | 10 | 10 | 88.11  | b2b5*b5y4y5y6y7y8y9y10                            | 1143.63 | 73.053  | 165955 | 2 | 572.32  | -2.99  |
| Q9BUF5 TBB6_HUMAN Tubulin beta-6 chain      | 2  |                                           | NSSYFVEWIPNNVK                     | 336 | 14 | 13 | 70.45  | b1*b1b2b8b9*b9b10y6y8y11y12*y12y14                | 1696.85 | 81.608  | 69008  | 2 | 848.93  | 7.63   |
| Q9BUF5 TBB6_HUMAN Tubulin beta-6 chain      | 3  | Phosphoryl STY(6)                         | ISEQFSAMFRR                        | 380 | 11 | 5  | 50.82  | b3b5*b5b6b9                                       | 1451.63 | 32.104  | 6046   | 2 | 726.32  | -8.91  |
| Q9BUF5 TBB6_HUMAN Tubulin beta-6 chain      | 4  | Oxidation+M(11)                           | ALTVPELTQQMF DAR                   | 282 | 15 | 3  | 26.39  | y4y10y12                                          | 1735.84 | 62.399  | 12338  | 2 | 868.43  | -13.50 |
| Q9BVA1 TBB2B_HUMAN Tubulin beta-2B chain    | 1  |                                           | LAVNMVPPFR                         | 252 | 10 | 10 | 88.11  | b2b5*b5y4y5y6y7y8y9y10                            | 1143.63 | 73.053  | 165955 | 2 | 572.32  | -2.99  |
| Q9BVA1 TBB2B_HUMAN Tubulin beta-2B chain    | 2  |                                           | SGPFGQIFRPDNFVFGQSGAGNN<br>WAK     | 77  | 26 | 19 | 104.86 | b2*b2b3b5b7*b7b13b14*b14b15b16y14y6y9y12y14y18y26 | 2798.37 | 90.282  | 157550 | 3 | 933.46  | 8.55   |

|                                                                  |    |                                          |                              |     |    |    |        |                                                                        |         |         |         |   |         |        |
|------------------------------------------------------------------|----|------------------------------------------|------------------------------|-----|----|----|--------|------------------------------------------------------------------------|---------|---------|---------|---|---------|--------|
| Q9BVA1 TBB2B_HUMAN Tubulin beta-2B chain                         | 3  | Carbamidomethyl+C(23)                    | LTTPTYGDLNHLVSATMSGVTTCLR    | 216 | 25 | 10 | 75.02  | y2y3y5y6y7y8y12y13y22y25                                               | 2708.34 | 96.113  | 91949   | 3 | 903.45  | 0.45   |
| Q9BVA1 TBB2B_HUMAN Tubulin beta-2B chain                         | 4  |                                          | NSSYFVEWIPNNVK               | 336 | 14 | 13 | 70.45  | b1*b1b2b8b9*b9b10y6y8y11y12*y12y14                                     | 1696.85 | 81.608  | 69008   | 2 | 848.93  | 7.63   |
| Q9BVA1 TBB2B_HUMAN Tubulin beta-2B chain                         | 5  |                                          | GHYTEGAELVDSVLDVVRK          | 103 | 19 | 4  | 23.88  | b5b12b14y4                                                             | 2087.07 | 87.643  | 31973   | 3 | 696.36  | -1.99  |
| Q9BVA1 TBB2B_HUMAN Tubulin beta-2B chain                         | 6  | Carbamidomethyl+C(10)                    | EIVHIQAGQCQGNQIGAK           | 2   | 17 | 4  | 16.47  | b12y2y3y8                                                              | 1822.93 | 44.237  | 10446   | 2 | 911.97  | 2.41   |
| Q9BVA1 TBB2B_HUMAN Tubulin beta-2B chain                         | 7  | Carbamidomethyl+C(12);Oxidation+M(1)     | MREIVHIQAGQCQGNQIGAK         | 0   | 19 | 3  | 34.67  | y9y10y11                                                               | 2126.08 | 66.280  | 19356   | 3 | 709.37  | 11.48  |
| Q9BYX7 ACTK_HUMAN Kappa-actin                                    | 1  |                                          | SYELPDGQVITIGNER             | 238 | 16 | 26 | 193.4  | b2b3b4*b4b8b9*b9b10b12*b12y3*y3y4*y4y5y6*y6y7y8y10*y10y11y12*y12y13y16 | 1790.90 | 71.713  | 2411471 | 2 | 895.95  | 2.39   |
| Q9BYX7 ACTK_HUMAN Kappa-actin                                    | 2  |                                          | QEYDESGPSIVHRK               | 359 | 14 | 18 | 140.35 | b3*b3*b3b14y2y3y4y5y6y7y8y9y10*y10y11y12y14*y14                        | 1644.78 | 32.324  | 365178  | 3 | 548.93  | -12.02 |
| Q9BYX7 ACTK_HUMAN Kappa-actin                                    | 3  |                                          | QEYDESGPSIVHR                | 359 | 13 | 9  | 93.28  | y2y3y4y5y6y8y10*y10y11                                                 | 1516.69 | 38.236  | 317262  | 3 | 506.24  | -7.73  |
| Q9BYX7 ACTK_HUMAN Kappa-actin                                    | 4  |                                          | IWHHTFYNELR                  | 84  | 11 | 6  | 24.51  | b10*b10y6*y6y8*y8                                                      | 1515.76 | 56.234  | 11854   | 2 | 758.38  | 5.32   |
| Q9BYX7 ACTK_HUMAN Kappa-actin                                    | 5  | Carbamidomethyl+C(16)                    | DDDTAVLVIDNGSGMCK            | 1   | 17 | 3  | 23.88  | b9b12b15                                                               | 1809.78 | 91.119  | 3178    | 2 | 905.40  | -8.43  |
| Q9BYX7 ACTK_HUMAN Kappa-actin                                    | 6  |                                          | HQGMMEGMHQK                  | 39  | 11 | 6  | 48.1   | b3b10*b10y6y8y9                                                        | 1313.58 | 32.102  | 33996   | 2 | 657.29  | 16.17  |
| Q9BYX7 ACTK_HUMAN Kappa-actin                                    | 7  |                                          | ELTDYLMK                     | 183 | 8  | 5  | 49.63  | b5b6*b6b7y6                                                            | 1012.51 | 46.487  | 6993    | 2 | 506.76  | 12.18  |
| Q9BYX7 ACTK_HUMAN Kappa-actin                                    | 8  | Carbamidomethyl+C(4)                     | EKLCYVALDSEQEMAMAASSSV EK    | 213 | 25 | 4  | 22.99  | b3b9b10*b10                                                            | 2763.23 | 97.633  | 7617    | 3 | 921.75  | -9.37  |
| Q9BYX7 ACTK_HUMAN Kappa-actin                                    | 9  | Carbamidomethyl+C(17);Phosphoryl STY(14) | MDDDTAVLVIDNGSGMCK           | 0   | 18 | 6  | 21.98  | b9b14*b14y3y14*y14                                                     | 2020.80 | 52.715  | 9958    | 2 | 1010.90 | 2.36   |
| Q9BYX7 ACTK_HUMAN Kappa-actin                                    | 10 | Phosphoryl STY(14)                       | HQGMMEGMHQKESYVKGKAQSK       | 39  | 22 | 4  | 34.89  | b11b12_H3PO4<br>b13_H3PO4<br>b12b13*b13                                | 2600.11 | 44.604  | 3550    | 4 | 650.78  | 4.23   |
| Q9GZV4 IF5A2_HUMAN Eukaryotic translation initiation factor 5A-2 | 1  |                                          | IVEMSTSK                     | 39  | 8  | 3  | 33.32  | b4b5y7                                                                 | 894.46  | 36.910  | 21843   | 2 | 447.73  | 1.77   |
| Q9GZV4 IF5A2_HUMAN Eukaryotic translation initiation factor 5A-2 | 2  | Carbamidomethyl+C(22)                    | MADEIDFTTG DAGASSTYPMQCS ALR | 0   | 26 | 4  | 18.46  | b15y9y11y15                                                            | 2795.23 | 81.666  | 17156   | 3 | 932.41  | 11.70  |
| Q9GZV4 IF5A2_HUMAN Eukaryotic translation initiation factor 5A-2 | 3  | Carbamidomethyl+C(5)                     | YEDICPSTHNMDVPMK             | 68  | 17 | 4  | 27.64  | b9y4y9y10                                                              | 2032.95 | 48.628  | 1790    | 2 | 1016.98 | 18.37  |
| Q9GZV4 IF5A2_HUMAN Eukaryotic translation initiation factor 5A-2 | 4  | Carbamidomethyl+C(4)                     | GRPCKIVEMSTSK                | 34  | 13 | 3  | 25.6   | b9b10y7                                                                | 1492.77 | 80.566  | 239888  | 3 | 498.26  | 9.08   |
| Q9GZV4 IF5A2_HUMAN Eukaryotic translation initiation factor 5A-2 | 5  |                                          | IVEMSTSKTGK                  | 39  | 11 | 3  | 31.5   | y7y9y10                                                                | 1180.63 | 32.281  | 8106    | 2 | 590.82  | 3.31   |
| Q9GZV4 IF5A2_HUMAN Eukaryotic translation initiation factor 5A-2 | 6  | Carbamidomethyl+C(7);Phosphoryl STY(17)  | NDYQLICIQDGYLSLLTETGEVRE DLK | 86  | 27 | 5  | 26.22  | b7b8b11_H3PO4<br>b11y10y12                                             | 3265.56 | 102.228 | 4144    | 3 | 1089.19 | 11.29  |

|                                                                          |    |                                                             |                                       |     |    |    |        |                                                                                                          |         |         |        |   |         |        |
|--------------------------------------------------------------------------|----|-------------------------------------------------------------|---------------------------------------|-----|----|----|--------|----------------------------------------------------------------------------------------------------------|---------|---------|--------|---|---------|--------|
| [Q9GZV4]IF5A2_HUMAN Eukaryotic translation initiation factor 5A-2        | 7  | Carbamidomethyl+C(13);Carbamidomethyl+C(26);Oxidation+M(15) | YNAGEDVQVSMCAMSEEYAVA<br>IKPCK        | 126 | 27 | 6  | 30.69  | b3b10b11b25y13y22                                                                                        | 3065.38 | 102.261 | 3482   | 2 | 1533.19 | 2.47   |
| [Q9GZV4]IF5A2_HUMAN Eukaryotic translation initiation factor 5A-2        | 8  | Carbamidomethyl+C(10)                                       | GASSTYPMQCSALR                        | 12  | 14 | 1  | 8.41   | b3                                                                                                       | 1528.70 | 81.661  | 13036  | 3 | 510.24  | 5.03   |
| [Q9GZV4]IF5A2_HUMAN Eukaryotic translation initiation factor 5A-2        | 9  |                                                             | VEMSTSK                               | 40  | 7  | 0  | 1.19   |                                                                                                          | 781.39  | 36.948  | 5548   | 2 | 391.20  | 13.12  |
| [Q9H299]SH3L3_HUMAN SH3 domain-binding glutamic acid-rich-like protein 3 | 1  |                                                             | VYSTSVTGSR                            | 5   | 10 | 6  | 20.81  | b2y3y8*y9*y9y10                                                                                          | 1056.53 | 28.293  | 61643  | 2 | 528.77  | 0.92   |
| [Q9H299]SH3L3_HUMAN SH3 domain-binding glutamic acid-rich-like protein 3 | 2  |                                                             | IQYQLVDISQDNALR                       | 32  | 15 | 6  | 52.7   | y4y7y9y10y13y15                                                                                          | 1775.91 | 70.684  | 61009  | 2 | 888.46  | -9.00  |
| [Q9H299]SH3L3_HUMAN SH3 domain-binding glutamic acid-rich-like protein 3 | 3  | Carbamidomethyl+C(13)                                       | ATPPQIVNGDQYCGDYELFVEAV<br>EQNTLQEFLK | 58  | 33 | 31 | 156.81 | b2b5*b5b7b9b10b11*b1<br>1b12*b13*b13b15b16y1<br>y2y3y4y5*y5y6y9*y9y1<br>0*y10*y10y11y12*y12y<br>13y15y33 | 3815.82 | 117.972 | 50409  | 3 | 1272.61 | 2.88   |
| [Q9H299]SH3L3_HUMAN SH3 domain-binding glutamic acid-rich-like protein 3 | 4  |                                                             | IQYQLVDISQDNALRDEMRR                  | 32  | 19 | 3  | 15.08  | b11y3y14                                                                                                 | 2307.16 | 71.502  | 14565  | 2 | 1154.08 | 7.09   |
| [Q9H4B7]TBB1_HUMAN Tubulin beta-1 chain                                  | 1  |                                                             | AVLVDLEPGTMDISIR                      | 62  | 15 | 12 | 89.59  | b3y2y3y7y8y9*y9y10y1<br>1*y11y12y15                                                                      | 1615.84 | 75.196  | 269805 | 2 | 808.43  | 5.14   |
| [Q9H4B7]TBB1_HUMAN Tubulin beta-1 chain                                  | 2  |                                                             | LGALFQPDSFVHGNSGAGNNWA<br>K           | 80  | 23 | 9  | 63.48  | b3b4b5b6b10y12y15y17<br>y23                                                                              | 2387.16 | 74.979  | 201426 | 3 | 796.39  | 3.27   |
| [Q9H4B7]TBB1_HUMAN Tubulin beta-1 chain                                  | 3  |                                                             | LAVNMVPPFR                            | 252 | 10 | 10 | 88.11  | b2b5*b5y4y5y6y7y8y9y<br>10                                                                               | 1143.63 | 73.053  | 165955 | 2 | 572.32  | -2.99  |
| [Q9H4B7]TBB1_HUMAN Tubulin beta-1 chain                                  | 4  |                                                             | ALSVAELTQQMFDAR                       | 282 | 15 | 17 | 153.67 | b4*b4b11b13b14*b14y2<br>y3y4y5y6y7y8y10y12y1<br>3y15                                                     | 1679.85 | 92.735  | 104812 | 2 | 840.43  | 2.62   |
| [Q9H4B7]TBB1_HUMAN Tubulin beta-1 chain                                  | 5  |                                                             | LHFFMPGFAPLTAQGSQQYR                  | 262 | 20 | 19 | 121.65 | b2b3b4b5b7b9b15y2y5y<br>6y7*y7*y7y9y11*y11y1<br>3y15y20                                                  | 2296.14 | 88.973  | 97110  | 3 | 766.05  | 1.81   |
| [Q9H4B7]TBB1_HUMAN Tubulin beta-1 chain                                  | 6  |                                                             | IMNSFSVMPSPK                          | 162 | 12 | 11 | 114.05 | b2b8y3y5y6y7y8y9y10y<br>11y12                                                                            | 1337.66 | 63.838  | 77887  | 2 | 669.33  | -1.00  |
| [Q9H4B7]TBB1_HUMAN Tubulin beta-1 chain                                  | 7  | Carbamidomethyl+C(4)                                        | NSSCFVEWIPNNVK                        | 336 | 14 | 11 | 67.44  | b1b9b13y5y8*y8y11y12<br>y13*y13y14                                                                       | 1693.81 | 75.795  | 75434  | 2 | 847.41  | 5.26   |
| [Q9H4B7]TBB1_HUMAN Tubulin beta-1 chain                                  | 8  |                                                             | GASALQLER                             | 37  | 9  | 4  | 38.48  | y4y5y7y9                                                                                                 | 944.52  | 41.606  | 67073  | 2 | 472.76  | 1.62   |
| [Q9H4B7]TBB1_HUMAN Tubulin beta-1 chain                                  | 9  |                                                             | LTTPTYGDLNHLVSLTMSGITSL<br>R          | 216 | 25 | 11 | 101.97 | y3y4y5y7y8y9y10y12y1<br>3y22y25                                                                          | 2691.41 | 108.116 | 63190  | 3 | 897.81  | 1.90   |
| [Q9H4B7]TBB1_HUMAN Tubulin beta-1 chain                                  | 10 |                                                             | EVDQQLLSVQTR                          | 324 | 12 | 6  | 61.51  | y3y4y5y6y10y12                                                                                           | 1415.75 | 53.287  | 50085  | 2 | 708.38  | 1.38   |
| [Q9H4B7]TBB1_HUMAN Tubulin beta-1 chain                                  | 11 |                                                             | ISVYYNEAYGR                           | 46  | 11 | 4  | 27.52  | b8y1y7y8                                                                                                 | 1334.64 | 51.452  | 42839  | 2 | 667.82  | 1.74   |
| [Q9H4B7]TBB1_HUMAN Tubulin beta-1 chain                                  | 12 |                                                             | GLSMAATFIGNNTAIQEIFNR                 | 359 | 21 | 9  | 27.04  | b9b11*b11b16y6y12*y1<br>2*y12y21                                                                         | 2268.14 | 101.162 | 38041  | 3 | 756.72  | -0.54  |
| [Q9H4B7]TBB1_HUMAN Tubulin beta-1 chain                                  | 13 | Carbamidomethyl+C(6);<br>Carbamidomethyl+C(8)               | HESESCDCLQGQFQVHSLGGGTGS<br>GMGTLLMNK | 121 | 33 | 5  | 16.87  | y3*y3y11y15*y15                                                                                          | 3507.56 | 65.107  | 16735  | 6 | 585.43  | -4.66  |
| [Q9H4B7]TBB1_HUMAN Tubulin beta-1 chain                                  | 14 |                                                             | VSEHFSAMFK                            | 380 | 10 | 6  | 43.15  | b4b5y2y5y6y10                                                                                            | 1182.55 | 54.739  | 16256  | 3 | 394.85  | -10.53 |
| [Q9H4B7]TBB1_HUMAN Tubulin beta-1 chain                                  | 15 |                                                             | GHYTEGAELIENVLEVVR                    | 103 | 18 | 4  | 26.81  | b15y4y5y7                                                                                                | 2028.03 | 101.172 | 50994  | 3 | 676.68  | -6.92  |

|                                         |    |                                             |                                        |     |    |    |       |                                          |         |         |        |   |         |        |
|-----------------------------------------|----|---------------------------------------------|----------------------------------------|-----|----|----|-------|------------------------------------------|---------|---------|--------|---|---------|--------|
| Q9H4B7 TBB1_HUMAN Tubulin beta-1 chain  | 16 |                                             | FWEMIGEEHGIDLAGSDR                     | 19  | 18 | 5  | 33.06 | b10b13y3y5y6                             | 2061.98 | 77.565  | 27644  | 2 | 1031.49 | 21.08  |
| Q9H4B7 TBB1_HUMAN Tubulin beta-1 chain  | 17 |                                             | AFVHWYTSEGMDINEFGEAENNI HDLVSEYQQFQDAK | 392 | 37 | 9  | 31.6  | b4b13b16b23y4y6y10*y10y12                | 4361.97 | 88.965  | 8651   | 3 | 1454.66 | 7.39   |
| Q9H4B7 TBB1_HUMAN Tubulin beta-1 chain  | 18 |                                             | LTTPTYGDLNHLVSLTMSGITSL RFPQQLNADLR    | 216 | 35 | 7  | 30.44 | b5b9b13y5y7y8y16                         | 3802.95 | 116.910 | 25759  | 4 | 951.49  | -7.77  |
| Q9H4B7 TBB1_HUMAN Tubulin beta-1 chain  | 19 |                                             | AVLEEEDEVTEEAEMEPEDKGH                 | 429 | 22 | 3  | 22.31 | b12y4y5                                  | 2515.08 | 66.876  | 2926   | 2 | 1258.04 | 4.37   |
| Q9H4B7 TBB1_HUMAN Tubulin beta-1 chain  | 20 | Oxidation+M(4)                              | FWEMIGEEHGIDLAGSDR                     | 19  | 18 | 3  | 22.89 | y7y9y13                                  | 2077.95 | 80.054  | 4996   | 3 | 693.32  | 11.98  |
| Q9H4B7 TBB1_HUMAN Tubulin beta-1 chain  | 21 |                                             | SVAELTQQMFDAR                          | 284 | 13 | 1  | 7.27  | b6                                       | 1495.71 | 92.664  | 2690   | 2 | 748.36  | -8.57  |
| Q9NY65 TBA8_HUMAN Tubulin alpha-8 chain | 1  |                                             | VGINYQPPTVVPGGDLAK                     | 352 | 18 | 12 | 60.45 | b3b6*b6b10b11*b11y2y3y7y8y12y18          | 1824.99 | 66.098  | 328422 | 2 | 913.00  | 3.14   |
| Q9NY65 TBA8_HUMAN Tubulin alpha-8 chain | 2  |                                             | NLDIERPTYTNLNR                         | 215 | 14 | 15 | 63.46 | b2*b2b3b5b10y2y4*y4y7y8*y8y12*y12*y12y14 | 1718.86 | 53.199  | 137824 | 3 | 573.63  | -11.36 |
| Q9NY65 TBA8_HUMAN Tubulin alpha-8 chain | 3  |                                             | FDGALNVDLTEFQTNLVPYPR                  | 243 | 21 | 15 | 83.88 | b1b2b3b5b11b16y2y3y4y5y6y11*y11y14y21    | 2409.24 | 95.365  | 45212  | 2 | 1205.12 | 11.86  |
| Q9NY65 TBA8_HUMAN Tubulin alpha-8 chain | 4  |                                             | FDLMYAK                                | 394 | 7  | 4  | 50.99 | b4y3y4y6                                 | 887.44  | 119.598 | 1608   | 1 | 887.44  | 11.90  |
| Q9NY65 TBA8_HUMAN Tubulin alpha-8 chain | 5  | Carbamidomethyl+C(3)                        | AVCMLSNTTAAIEAWAR                      | 373 | 17 | 6  | 33.08 | b8b11b15*b15y7y14                        | 1864.91 | 84.460  | 122449 | 2 | 932.96  | 5.63   |
| Q9NY65 TBA8_HUMAN Tubulin alpha-8 chain | 6  |                                             | AVMIDLEPTVVDEV                         | 64  | 15 | 3  | 24.33 | b7y10y11                                 | 1685.88 | 79.646  | 21153  | 2 | 843.45  | 4.13   |
| Q9NY65 TBA8_HUMAN Tubulin alpha-8 chain | 7  |                                             | GHYTVGK                                | 105 | 7  | 3  | 37.69 | b3b4y3                                   | 761.39  | 41.196  | 7038   | 1 | 761.39  | -7.13  |
| Q9NY65 TBA8_HUMAN Tubulin alpha-8 chain | 8  | Carbamidomethyl+C(15);Carbamidomethyl+C(25) | AYHEQLSVAEITSSCFEPNSQMVK CDPR          | 280 | 28 | 9  | 40.67 | b6*b6*b6b7b15y5y6y11y13                  | 3283.49 | 81.702  | 5499   | 4 | 821.63  | 1.49   |
| Q9UBW5 BIN2_HUMAN Bridging integrator 2 | 1  |                                             | AIVWNNDLLWEDYEEK                       | 100 | 16 | 3  | 23.86 | b10y11y12                                | 2036.97 | 88.210  | 25416  | 2 | 1018.99 | 2.76   |
| Q9UBW5 BIN2_HUMAN Bridging integrator 2 | 2  |                                             | AQTVFEDLNQELLEELPILYNSR                | 179 | 23 | 14 | 70.63 | b2*b2b3b5b9b12b21*b21y3*y3y4y5y7y23      | 2734.38 | 118.952 | 18707  | 3 | 912.13  | -4.11  |
| Q9UBW5 BIN2_HUMAN Bridging integrator 2 | 3  |                                             | TSLEVSPNPEPEKPV                        | 460 | 17 | 7  | 49.02 | b6b9b10b12*b12b13y17                     | 1875.97 | 127.908 | 5776   | 2 | 938.49  | -5.21  |
| Q9UBW5 BIN2_HUMAN Bridging integrator 2 | 4  |                                             | FEQSASNFYQQAEGHK                       | 42  | 17 | 6  | 23.16 | b4*b4b10y3y11y17                         | 1998.92 | 60.005  | 5162   | 2 | 999.96  | 12.46  |
| Q9UBW5 BIN2_HUMAN Bridging integrator 2 | 5  | Carbamidomethyl+C(14)                       | ENENIHQNPEELCTSPMLTSQV ASEPGK          | 482 | 32 | 4  | 21.83 | b9y5y7y8                                 | 3554.62 | 58.985  | 4605   | 3 | 1185.55 | 6.04   |
| Q9UBW5 BIN2_HUMAN Bridging integrator 2 | 6  |                                             | LVDYDSAR                               | 145 | 8  | 3  | 36.33 | b4b7y4                                   | 938.46  | 46.338  | 46597  | 2 | 469.73  | -1.69  |
| Q9UBW5 BIN2_HUMAN Bridging integrator 2 | 7  |                                             | SQEEVLPSSTTPSPGGALSPSQPS SSATEVVL      | 356 | 34 | 6  | 28.89 | b5*b5b12b17y14y15                        | 3339.67 | 66.647  | 15848  | 3 | 1113.89 | 4.02   |
| Q9UBW5 BIN2_HUMAN Bridging integrator 2 | 8  |                                             | ASLGTGTASPR                            | 449 | 11 | 8  | 65.38 | b4b7b9*b9y6y8*y8y9                       | 1017.53 | 26.751  | 13171  | 2 | 509.27  | -5.76  |
| Q9UBW5 BIN2_HUMAN Bridging integrator 2 | 9  |                                             | LNHNLYEVMK                             | 226 | 11 | 3  | 24.51 | b8b10y8                                  | 1347.69 | 75.614  | 7600   | 1 | 1347.69 | 13.41  |
| Q9UBW5 BIN2_HUMAN Bridging integrator 2 | 10 | Carbamidomethyl+C(17)                       | EGSEASSSEDEPLPACNGPAQAQ PSPTTER        | 323 | 31 | 4  | 11.3  | b5b16y13*y13                             | 3228.45 | 85.349  | 5579   | 3 | 1076.82 | 19.28  |
| Q9UBW5 BIN2_HUMAN Bridging integrator 2 | 11 |                                             | SESEVSATEDLAPDAAQGEDNSE IK             | 287 | 26 | 3  | 12.23 | b8b10y8                                  | 2679.22 | 68.416  | 5523   | 3 | 893.75  | 17.59  |
| Q9UBW5 BIN2_HUMAN Bridging integrator 2 | 12 |                                             | ATASPRPSSGNIPSSPTASGGGSPT SPR          | 421 | 28 | 5  | 17.48 | b17y9y11*y11y19                          | 2581.32 | 90.959  | 4331   | 3 | 861.11  | 21.94  |
| Q9UBW5 BIN2_HUMAN Bridging integrator 2 | 13 | Carbamidomethyl+C(3)                        | IGCYVTIFQNISNLR                        | 202 | 15 | 4  | 18.31 | b7y4*y4y7                                | 1797.95 | 95.177  | 3735   | 3 | 599.99  | 10.18  |

|                                         |    |                                          |                                              |     |    |    |        |                                   |         |         |        |   |         |        |
|-----------------------------------------|----|------------------------------------------|----------------------------------------------|-----|----|----|--------|-----------------------------------|---------|---------|--------|---|---------|--------|
| Q9UBW5 BIN2_HUMAN Bridging integrator 2 | 14 |                                          | KLVDYDSAR                                    | 144 | 9  | 3  | 38.48  | y5y7y8                            | 1066.56 | 63.879  | 125759 | 2 | 533.78  | 3.66   |
| Q9UBW5 BIN2_HUMAN Bridging integrator 2 | 15 |                                          | TATVSSPLTSPSTLSLKSESES VSATEDLAPDAAQGEDNSEIK | 267 | 46 | 3  | 11.13  | b5b18y11                          | 4635.18 | 120.859 | 21611  | 4 | 1159.55 | -8.32  |
| Q9UBW5 BIN2_HUMAN Bridging integrator 2 | 16 |                                          | AIVWNNDLLWEDYEEKLADQAV R                     | 100 | 23 | 4  | 17.68  | b8b10y3y7                         | 2790.37 | 112.912 | 6915   | 3 | 930.80  | -0.96  |
| Q9UBW5 BIN2_HUMAN Bridging integrator 2 | 17 |                                          | TMEIYVAQFSEIKER                              | 123 | 15 | 3  | 26.39  | b6b12b13                          | 1843.95 | 91.089  | 4671   | 2 | 922.48  | 11.65  |
| Q9UBW5 BIN2_HUMAN Bridging integrator 2 | 18 |                                          | EMSKLNHNLYEVMSK                              | 222 | 15 | 4  | 26.39  | b7b9b11*b11                       | 1822.86 | 50.626  | 3802   | 3 | 608.29  | -12.19 |
| Q9UBW5 BIN2_HUMAN Bridging integrator 2 | 19 | Carbamidomethyl+C(3); Phosphoryl STY(12) | IGCYVTIFQNISNLRDVFYR                         | 202 | 20 | 5  | 28.31  | b10b14b19y10y19                   | 2558.19 | 107.886 | 2972   | 3 | 853.40  | -9.16  |
| Q9UBW5 BIN2_HUMAN Bridging integrator 2 | 20 | Oxidation+M(1)                           | MEDKEKDNK                                    | 515 | 9  | 3  | 30.7   | b5y3y6                            | 1152.52 | 93.067  | 55977  | 2 | 576.76  | -1.59  |
| Q9UBW5 BIN2_HUMAN Bridging integrator 2 | 21 | Oxidation+M(9)                           | LNHNLYEVMSK                                  | 226 | 11 | 4  | 24.51  | b4y3y5°y5                         | 1363.65 | 63.101  | 4928   | 3 | 455.22  | -9.31  |
| Q9UBW5 BIN2_HUMAN Bridging integrator 2 | 22 |                                          | FEQSASNF                                     | 42  | 8  | 0  | 4.76   |                                   | 929.40  | 60.083  | 2036   | 2 | 465.20  | -0.59  |
| Q9UII5 TAGL3_HUMAN Transgelin-3         | 1  |                                          | GASQAGMTGYGMPR                               | 182 | 14 | 12 | 51.13  | b3°b3b5°b5°b5y6y7°y7 y9y12y14*y14 | 1383.62 | 45.477  | 21516  | 2 | 692.31  | 2.65   |
| Q9UII5 TAGL3_HUMAN Transgelin-3         | 2  |                                          | GEPSWFHR                                     | 145 | 8  | 4  | 41.1   | b2y4y6y7                          | 1015.46 | 115.684 | 2362   | 1 | 1015.46 | -10.88 |
| Q9UII5 TAGL3_HUMAN Transgelin-3         | 3  |                                          | QMEQISQFLK                                   | 88  | 10 | 5  | 37.12  | b5°b5b6°b6b7                      | 1251.66 | 46.425  | 61467  | 2 | 626.33  | 13.75  |
| Q9UII5 TAGL3_HUMAN Transgelin-3         | 4  | Carbamidomethyl+C(9)                     | LVDWILQCAEDIEHPPGR                           | 29  | 20 | 6  | 25.47  | b14°b14*b14y4y5y16                | 2358.19 | 77.336  | 4731   | 3 | 786.74  | 1.45   |
| Q9UII5 TAGL3_HUMAN Transgelin-3         | 5  |                                          | QGQNVIGLQMGSNK                               | 168 | 14 | 3  | 19.46  | b5y4y7                            | 1473.75 | 23.864  | 4400   | 3 | 491.92  | 2.15   |
| Q9UII5 TAGL3_HUMAN Transgelin-3         | 6  |                                          | QGQNVIGLQMGSNKGASQAGMT GYGMPR                | 168 | 28 | 8  | 30.98  | b11*b11b12y5y7°y7y11 *y11         | 2838.37 | 111.526 | 1798   | 4 | 710.35  | 7.83   |
| Q9UII5 TAGL3_HUMAN Transgelin-3         | 7  | Oxidation+M(16)                          | TTDIFQTVDLWEGKDMAAVQR                        | 106 | 21 | 9  | 45.31  | b7b13*b13b15y5y7°y7y13y16         | 2440.18 | 121.805 | 4159   | 2 | 1220.59 | -1.30  |
| Q9Y281 COF2_HUMAN Cofilin-2             | 1  |                                          | KEDLVFIFWAPESAPLK                            | 95  | 17 | 11 | 102.82 | b5b6b7b9b10y3y6y7y8y9y17          | 1990.05 | 98.270  | 285289 | 3 | 664.02  | -6.93  |
| Q9Y281 COF2_HUMAN Cofilin-2             | 2  |                                          | YALYDATYETK                                  | 81  | 11 | 11 | 87.71  | b2b3y2y4y5°y5y7y8y9y10y11         | 1337.63 | 53.194  | 149364 | 2 | 669.32  | -0.64  |
| Q9Y281 COF2_HUMAN Cofilin-2             | 3  |                                          | VFNDMK                                       | 13  | 6  | 1  | 13.7   | y5                                | 753.35  | 31.817  | 13259  | 2 | 377.18  | -10.37 |
| Q9Y281 COF2_HUMAN Cofilin-2             | 4  |                                          | MASGVTVNDEVIK                                | 0   | 13 | 8  | 34.34  | b6°b6b8b12°b12*b12y8 *y8          | 1362.71 | 72.049  | 3805   | 1 | 1362.71 | 10.48  |
| Q9Y281 COF2_HUMAN Cofilin-2             | 5  | Carbamidomethyl+C(5)                     | AVLFLSDDK                                    | 34  | 10 | 4  | 41.39  | b8b9y3y9                          | 1167.58 | 48.953  | 1655   | 2 | 584.29  | 7.63   |
| Q9Y281 COF2_HUMAN Cofilin-2             | 6  |                                          | MASGVTVNDEVIKVFNDMK                          | 0   | 19 | 4  | 20.92  | b6b9y4y12                         | 2097.07 | 72.782  | 7573   | 3 | 699.69  | 14.55  |
| Q9Y281 COF2_HUMAN Cofilin-2             | 7  |                                          | ASGVTVNDEVIKVFNDMK                           | 1   | 18 | 6  | 15.73  | b8°b8y3°y3y7*y7                   | 1965.99 | 106.417 | 6625   | 3 | 656.00  | -3.48  |

Healty PLT LC-MS run 2: PLT\_sani\_290709\_02

| Protein name                             | Peptide Rank | Peptide Modification  | Peptide Sequence       | Peptide sequence start | Peptide sequence Length | Peptide Matched Products | Score  | By Matches                                                                                        | Precursor MH+ (Da) | Retention time (min) | Intensity | z | Precursor m/z | MH+ Error (ppm) |
|------------------------------------------|--------------|-----------------------|------------------------|------------------------|-------------------------|--------------------------|--------|---------------------------------------------------------------------------------------------------|--------------------|----------------------|-----------|---|---------------|-----------------|
| P68871 HBB_HUMAN Hemoglobin subunit beta | 1            |                       | LLVVYPWTQR             | 31                     | 10                      | 21                       | 130.25 | b2b3b4b5y1y2*y2y3°y3*y3y4y5°y5*y5y6*y6y7*y7y8y9y10                                                | 1274.72            | 79.093               | 1756497   | 2 | 637.87        | -1.92           |
| P68871 HBB_HUMAN Hemoglobin subunit beta | 2            |                       | EFTPPVQAAYQK           | 121                    | 12                      | 19                       | 114.06 | b2b3°b3b12y1y2*y2y3y4y5y6*y6y7*y7y8y9y10°y10y12                                                   | 1378.71            | 50.801               | 1023261   | 2 | 689.86        | 3.54            |
| P68871 HBB_HUMAN Hemoglobin subunit beta | 3            |                       | VNVDEVGGEALGR          | 18                     | 13                      | 35                       | 229.35 | b2*b2b3b4°b4*b4b5°b5*b5b6°b6*b6b8*b8b10b11b12*b12y2y3y4y6y7°y7y8y9°y9y10°y10y11°y11y12°y12*y12y13 | 1314.66            | 51.377               | 914943    | 2 | 657.84        | -1.49           |
| P68871 HBB_HUMAN Hemoglobin subunit beta | 4            |                       | VLGAFSDGLAHLNDLK       | 67                     | 16                      | 22                       | 153.6  | b1b2b3y1y2y3*y3y4*y4y5°y5y6*y6y7y9y10y11y12°y12y13y14y16                                          | 1669.87            | 76.998               | 840185    | 3 | 557.29        | -14.55          |
| P68871 HBB_HUMAN Hemoglobin subunit beta | 5            |                       | FFESFGDLSTPDAVMGNPK    | 41                     | 19                      | 30                       | 257.46 | b2b3b4°b4b6b7b10°b10b14b17°b17y2y3y4*y4y5y6y7y8°y8y9y10y11y12y14y15y16y17°y17y19                  | 2058.96            | 82.601               | 643164    | 2 | 1029.98       | 6.05            |
| P68871 HBB_HUMAN Hemoglobin subunit beta | 6            |                       | SAVTALWGK              | 9                      | 9                       | 14                       | 103.25 | b5°b5b7°b7y1y2y3y4y5y6°y6y7y8y9                                                                   | 932.51             | 61.444               | 439804    | 2 | 466.76        | -7.85           |
| P68871 HBB_HUMAN Hemoglobin subunit beta | 7            | Carbamidomethyl+C(8)  | LLGNVLVCVLAHHFGK       | 105                    | 16                      | 19                       | 164.77 | b2b3b4°b4b5°b5y1y2y3y4y5y6y7y8y9y10y11y15y16                                                      | 1776.97            | 92.706               | 424119    | 3 | 593.00        | -11.82          |
| P68871 HBB_HUMAN Hemoglobin subunit beta | 8            |                       | VVAGVANALAHK           | 133                    | 12                      | 16                       | 124.06 | b2b5b8y2y3y4y5y6*y6y7*y7y8y9°y9y10y12                                                             | 1149.67            | 42.624               | 399304    | 2 | 575.34        | -4.57           |
| P68871 HBB_HUMAN Hemoglobin subunit beta | 9            | Carbamidomethyl+C(11) | GTFATLSELHCDK          | 83                     | 13                      | 20                       | 168.35 | b3b4b5°b5b8b11b12y1y2y3y4°y4y5°y5y7y8y9°y9y11y13                                                  | 1478.70            | 54.455               | 235154    | 2 | 739.85        | 1.49            |
| P68871 HBB_HUMAN Hemoglobin subunit beta | 10           |                       | VHLTPEEK               | 1                      | 8                       | 5                        | 36.33  | b2b3y4y6y8                                                                                        | 952.50             | 26.639               | 141814    | 2 | 476.76        | -6.22           |
| P68871 HBB_HUMAN Hemoglobin subunit beta | 11           |                       | LHVDPENFR              | 96                     | 9                       | 14                       | 103.25 | b2b3b4y2y3*y3y4°y4y5y6y7y8*y8y9                                                                   | 1126.56            | 47.573               | 117292    | 2 | 563.78        | -2.17           |
| P68871 HBB_HUMAN Hemoglobin subunit beta | 12           |                       | MVHLTPEEKSAVTALWGK     | 0                      | 18                      | 4                        | 15.73  | b5b9°b9y16                                                                                        | 1997.08            | 72.045               | 906599    | 2 | 999.04        | 14.55           |
| P68871 HBB_HUMAN Hemoglobin subunit beta | 13           | Carbamidomethyl+C(11) | GTFATLSELHCDKLHVDPENFR | 83                     | 22                      | 11                       | 44.52  | b3°b3b5°b5y3*y3y5*y5y6y10y16                                                                      | 2586.22            | 68.182               | 480436    | 4 | 647.31        | -8.87           |
| P68871 HBB_HUMAN Hemoglobin subunit beta | 14           | Oxidation+M(15)       | FFESFGDLSTPDAVMGNPK    | 41                     | 19                      | 9                        | 48.31  | b4b5b13b17y5y11*y11y14°y14                                                                        | 2074.97            | 75.455               | 21761     | 2 | 1037.99       | 11.77           |
| P68871 HBB_HUMAN Hemoglobin subunit beta | 15           |                       | AGVANALAHK             | 135                    | 10                      | 9                        | 79.59  | b3b4b5°b5b6°b6b8°b8b9                                                                             | 951.53             | 42.624               | 237428    | 2 | 476.27        | -10.58          |
| P68871 HBB_HUMAN Hemoglobin subunit beta | 16           |                       | VAGVANALAHK            | 134                    | 11                      | 1                        | 7.63   | b3                                                                                                | 1050.60            | 42.629               | 77273     | 2 | 525.80        | -5.23           |
| P68871 HBB_HUMAN Hemoglobin subunit beta | 17           | Carbamidomethyl+C(2)  | VCVLAHHFGK             | 111                    | 10                      | 1                        | 7.25   | b4                                                                                                | 1167.60            | 92.711               | 49824     | 2 | 584.30        | -7.63           |
| P68871 HBB_HUMAN Hemoglobin subunit beta | 18           |                       | VTALWGK                | 11                     | 7                       | 4                        | 23.42  | b4°b4b5°b5                                                                                        | 774.45             | 61.443               | 44412     | 1 | 774.45        | 2.60            |
| P68871 HBB_HUMAN Hemoglobin subunit beta | 19           |                       | GAFSDGLAHLNDLK         | 69                     | 14                      | 3                        | 34.73  | b3b4b5                                                                                            | 1457.74            | 77.012               | 42649     | 2 | 729.38        | 3.18            |
| P68871 HBB_HUMAN Hemoglobin subunit beta | 20           |                       | AVTALWGK               | 10                     | 8                       | 0                        | 1.59   |                                                                                                   | 845.48             | 61.366               | 36134     | 1 | 845.48        | -8.23           |

|                                          |    |                                             |                                |     |    |    |        |                                                                                                                             |         |        |         |   |         |        |
|------------------------------------------|----|---------------------------------------------|--------------------------------|-----|----|----|--------|-----------------------------------------------------------------------------------------------------------------------------|---------|--------|---------|---|---------|--------|
| P68871 HBB_HUMAN Hemoglobin subunit beta | 21 | Carbamidomethyl+C(6)                        | GNVLCVLAHHFGK                  | 107 | 14 | 2  | 14.44  | b3b11                                                                                                                       | 1550.81 | 92.684 | 21707   | 3 | 517.61  | -9.05  |
| P68871 HBB_HUMAN Hemoglobin subunit beta | 22 |                                             | ANALAHK                        | 138 | 7  | 2  | 21.6   | b3b4                                                                                                                        | 724.41  | 42.543 | 15480   | 1 | 724.41  | 5.90   |
| P68871 HBB_HUMAN Hemoglobin subunit beta | 23 | Carbamidomethyl+C(9)                        | FATLSELHCDK                    | 85  | 11 | 5  | 30.08  | b3°b3b5°b5b9                                                                                                                | 1320.61 | 54.451 | 12832   | 3 | 440.88  | -8.78  |
| P68871 HBB_HUMAN Hemoglobin subunit beta | 24 | Carbamidomethyl+C(3)                        | LVCVLAHHFGK                    | 110 | 11 | 0  | 4.36   |                                                                                                                             | 1280.68 | 92.622 | 10386   | 2 | 640.84  | -12.49 |
| P68871 HBB_HUMAN Hemoglobin subunit beta | 25 | Carbamidomethyl+C(7)                        | LGNVLCVLAHHFGK                 | 106 | 15 | 0  | 4.36   |                                                                                                                             | 1663.90 | 92.675 | 9517    | 3 | 555.30  | -9.02  |
| P68871 HBB_HUMAN Hemoglobin subunit beta | 26 |                                             | LGAFSDGLAHLNLIK                | 68  | 15 | 2  | 14.44  | b4b9                                                                                                                        | 1570.81 | 76.951 | 5630    | 2 | 785.91  | -7.69  |
| P68871 HBB_HUMAN Hemoglobin subunit beta | 27 | Carbamidomethyl+C(4)                        | VLVCVLAHHFGK                   | 109 | 12 | 2  | 20.97  | b3b4                                                                                                                        | 1379.74 | 92.679 | 3047    | 2 | 690.37  | -13.98 |
| P68871 HBB_HUMAN Hemoglobin subunit beta | 28 |                                             | LAHHFGK                        | 114 | 7  | 1  | 7.25   | b5                                                                                                                          | 809.43  | 92.704 | 1761    | 2 | 405.22  | -12.14 |
| P68871 HBB_HUMAN Hemoglobin subunit beta | 29 |                                             | EFTPPVQAAYQK                   | 121 | 12 | 0  | 2.78   |                                                                                                                             | 1360.70 | 50.781 | 12913   | 2 | 680.85  | 9.33   |
| P68871 HBB_HUMAN Hemoglobin subunit beta | 30 | Carbamidomethyl+C(8)                        | LLGNVLCVLAHHFGK                | 105 | 16 | 0  | 4.36   |                                                                                                                             | 1759.96 | 92.689 | 3177    | 4 | 440.75  | -2.50  |
| P60709 ACTB_HUMAN Actin                  | 1  |                                             | SYELPDGQVITIGNER               | 238 | 16 | 25 | 199.45 | b2b3b8b9°b9b10b11°b11b12°b12y3*y3y4y5y6*y6y7y8y10*y10y11y12°y12y13y16                                                       | 1790.90 | 71.671 | 2789179 | 2 | 895.96  | 7.02   |
| P60709 ACTB_HUMAN Actin                  | 2  |                                             | VAPEEHPVLLTEAPLNPK             | 95  | 18 | 27 | 195.85 | b2b4b6b10y2y3*y3y4y5*y5y6y7y8*y8y9°y9y10°y10y11y12°y12y13y14*y14y16°y16y18                                                  | 1954.06 | 61.573 | 2501157 | 3 | 652.03  | -0.69  |
| P60709 ACTB_HUMAN Actin                  | 3  |                                             | AGFAGDDAPR                     | 18  | 10 | 17 | 127.24 | b2b3b4b8y1y2y3y4°y4y5y6°y6y7°y7y8y9y10                                                                                      | 976.45  | 31.456 | 1944071 | 2 | 488.73  | -3.06  |
| P60709 ACTB_HUMAN Actin                  | 4  |                                             | EITALAPSTMK                    | 315 | 11 | 25 | 159.02 | b1b2°b2b3°b3b4°b4b5°b5b6b10b11y1y2y3y4y5°y5y6°y6y7y8y9°y9y11                                                                | 1161.62 | 50.929 | 1207932 | 2 | 581.31  | -2.21  |
| P60709 ACTB_HUMAN Actin                  | 5  |                                             | TTGIVMDSGDGVTHTVPIYEGYALPHAILR | 147 | 30 | 34 | 275.93 | b2°b2b3°b3b4b6°b6b7b16°b16b18b26b30y2y3y5y6y7y8y9y10y11y12y14y15y16y20y22y23y24y25y26y28y30                                 | 3183.61 | 80.501 | 1157859 | 4 | 796.66  | -2.53  |
| P60709 ACTB_HUMAN Actin                  | 6  |                                             | AVFPSIVGRPR                    | 28  | 11 | 14 | 114.34 | b1b2b9y1y2y3y4y5y6y7y8y9y10y11                                                                                              | 1198.71 | 56.275 | 885373  | 2 | 599.86  | 1.63   |
| P60709 ACTB_HUMAN Actin                  | 7  | Carbamidomethyl+C(1); Carbamidomethyl+C(16) | CPEALFQPSFLGMESCGIHETTENSIMK   | 256 | 28 | 43 | 296.54 | b2b3b4°b4b5b7°b7b8°b8b10b11°b11b13°b13b14b15b28y2y3y4y5*y5y6*y6y8y9y10y12°y12y13*y13y14*y14y15y16y17*y17y18°y18y21y23y24y28 | 3231.47 | 92.892 | 869739  | 3 | 1077.83 | 3.25   |
| P60709 ACTB_HUMAN Actin                  | 8  |                                             | DLYANTVLSGGTTMYPGIADR          | 291 | 21 | 28 | 207.33 | b2b3b4b6b10b14°b14b15°b15b18y1y2y4y5y6y7y8y9y11y12y13°y13y14y15°y15y17°y17y21                                               | 2215.08 | 77.740 | 823708  | 2 | 1108.05 | 6.17   |



|                         |    |                                                |                                    |     |    |    |        |                                                                                                                 |         |         |        |   |         |        |
|-------------------------|----|------------------------------------------------|------------------------------------|-----|----|----|--------|-----------------------------------------------------------------------------------------------------------------|---------|---------|--------|---|---------|--------|
| P60709 ACTB_HUMAN Actin | 9  |                                                | GYSFTTTAER                         | 196 | 10 | 15 | 88.12  | b2b3°b3b10y1y2y3y4y5y6y7°y7y8°y8y10                                                                             | 1132.53 | 43.283  | 762297 | 2 | 566.77  | -1.62  |
| P60709 ACTB_HUMAN Actin | 10 |                                                | DSYVGDEAQSQR                       | 50  | 12 | 43 | 242.25 | b1°b1b2°b2b3°b3b4°b4b5b6b7°b7b8b9b10b11y1y2y3°y3y4°y4°y5°y5°y5y6°y6°y6y7°y7°y7y8°y8°y8y9°y9°y9y10°y10y11y12°y12 | 1354.62 | 24.266  | 700316 | 2 | 677.81  | -5.59  |
| P60709 ACTB_HUMAN Actin | 11 |                                                | QEYDESGPSIVHRK                     | 359 | 14 | 24 | 175.06 | b3°b3b4°b4°b4b5b7°b7b14y2y3y4y5y6°y6y7y8y9y10°y10y11y12y14°y14                                                  | 1644.78 | 32.248  | 414928 | 3 | 548.93  | -11.87 |
| P60709 ACTB_HUMAN Actin | 12 |                                                | HQGVMMVGMGQK                       | 39  | 11 | 26 | 188.64 | b1b2°b2b3b4°b4b5b6b8°b8b9b10y1y2°y2y3°y3y4°y4y5y6y7y9y10°y10y11                                                 | 1171.57 | 33.564  | 386900 | 2 | 586.29  | 0.21   |
| P60709 ACTB_HUMAN Actin | 13 | Carbamidomethyl+C(2)                           | LCYVALDFEQEMATAASSSSLEK            | 215 | 23 | 30 | 229.47 | b2b3b5b6b7°b7b8b9b11°b11b15b16b17y1y4y5y6y7y9y10y11°y11y12y13°y13y16°y16y17°y17y23                              | 2550.20 | 92.835  | 345239 | 2 | 1275.60 | 8.81   |
| P60709 ACTB_HUMAN Actin | 14 |                                                | QEYDESGPSIVHR                      | 359 | 13 | 6  | 78.23  | y3y4y5y6y8y11                                                                                                   | 1516.70 | 38.099  | 279257 | 3 | 506.24  | -0.32  |
| P60709 ACTB_HUMAN Actin | 15 |                                                | KDLYANTVLSGGTTMYPGIADR             | 290 | 22 | 23 | 143.31 | b3b4b7°b7b8b9b16°b16b22y1y2y3y5y6y7y8y10y12y13°y13y14°y14y22                                                    | 2343.17 | 69.147  | 206145 | 3 | 781.73  | 0.52   |
| P60709 ACTB_HUMAN Actin | 16 |                                                | IIAPPERK                           | 328 | 8  | 11 | 76.24  | b2b3y2y3y4°y4y5y6°y6y7y8                                                                                        | 923.56  | 26.997  | 133691 | 2 | 462.28  | -8.33  |
| P60709 ACTB_HUMAN Actin | 17 | Carbamidomethyl+C(1)                           | CDVDIRK                            | 284 | 7  | 12 | 93.92  | b1b2°b2b3b4b5y3y4°y4y5y6y7                                                                                      | 905.44  | 22.935  | 126991 | 2 | 453.22  | -9.91  |
| P60709 ACTB_HUMAN Actin | 18 |                                                | DSYVGDEAQSQR                       | 50  | 11 | 4  | 37.02  | b5b9b10y9                                                                                                       | 1198.52 | 26.159  | 22055  | 1 | 1198.52 | 1.73   |
| P60709 ACTB_HUMAN Actin | 19 | Carbamidomethyl+C(3);<br>Carbamidomethyl+C(18) | FRCPEALFQPSFLGMESCGIHETTF<br>NSIMK | 254 | 30 | 25 | 201.73 | b3b5b6b7b8b9b10b12b14y4y5y7°y7y8°y8y9y10°y10y14°y14y15y16y17y19y21                                              | 3534.61 | 90.977  | 905672 | 4 | 884.41  | -6.56  |
| P60709 ACTB_HUMAN Actin | 20 |                                                | IKIIAPPER                          | 326 | 9  | 4  | 38.49  | y3°y3y5y6                                                                                                       | 1036.65 | 44.197  | 35501  | 2 | 518.83  | -1.65  |
| P60709 ACTB_HUMAN Actin | 21 |                                                | DLYANTVLSGGTTMYPGIADRMQ<br>K       | 291 | 24 | 7  | 23.62  | b3y11y12°y12°y12y14°y14                                                                                         | 2602.29 | 71.161  | 26530  | 4 | 651.33  | 9.19   |
| P60709 ACTB_HUMAN Actin | 22 | Carbamidomethyl+C(4)                           | EKLCYVALDFEQEMATAASSSSLE<br>K      | 213 | 25 | 6  | 33.78  | b4b6b14y3y13y14                                                                                                 | 2807.34 | 92.999  | 25716  | 2 | 1404.17 | 9.74   |
| P60709 ACTB_HUMAN Actin | 23 |                                                | KDLYANTVLSGGTTMYPGIADR             | 290 | 22 | 4  | 21.08  | b4b6b17y10                                                                                                      | 2343.13 | 65.049  | 15383  | 3 | 781.72  | -14.38 |
| P60709 ACTB_HUMAN Actin | 24 |                                                | IIAPPERK                           | 328 | 8  | 3  | 33.32  | b3y6y7                                                                                                          | 923.57  | 37.525  | 14595  | 2 | 462.29  | -1.92  |
| P60709 ACTB_HUMAN Actin | 25 |                                                | ILTERGYSFTTTAER                    | 191 | 15 | 3  | 26.4   | y3y7y12                                                                                                         | 1744.88 | 84.481  | 8311   | 2 | 872.94  | -3.71  |
| P60709 ACTB_HUMAN Actin | 26 | Carbamidomethyl+C(16)                          | DDDIAALVVDNGSGMCKAGFAG<br>DDAPR    | 1   | 27 | 5  | 15.5   | b8b13y4°y4y7                                                                                                    | 2737.26 | 103.876 | 2241   | 4 | 685.07  | 13.11  |
| P60709 ACTB_HUMAN Actin | 27 | Carbamidomethyl+C(16);<br>Phosphoryl.STY(13)   | DDDIAALVVDNGSGMCK                  | 1   | 17 | 3  | 16.48  | b12y3y15                                                                                                        | 1859.73 | 82.286  | 630359 | 3 | 620.58  | -7.02  |
| P60709 ACTB_HUMAN Actin | 28 | Oxidation+M()                                  | KDLYANTVLSGGTTMYPGIADR             | 290 | 22 | 5  | 24.43  | b5b7°b7b8y6                                                                                                     | 2359.16 | 63.042  | 5953   | 3 | 787.06  | -1.66  |
| P60709 ACTB_HUMAN Actin | 29 | Carbamidomethyl+C(2);<br>Oxidation+M()         | LCYVALDFEQEMATAASSSSLEK            | 215 | 23 | 5  | 24     | b4b5b13°b13y13                                                                                                  | 2566.20 | 90.797  | 1769   | 2 | 1283.60 | 11.42  |
| P60709 ACTB_HUMAN Actin | 30 |                                                | SGPSIVHRK                          | 364 | 9  | 2  | 7.33   | b3°b3                                                                                                           | 980.56  | 32.252  | 59897  | 2 | 490.78  | -4.11  |

|                         |    |                                                |                               |     |    |    |        |                                                                                                                             |         |        |         |   |         |        |
|-------------------------|----|------------------------------------------------|-------------------------------|-----|----|----|--------|-----------------------------------------------------------------------------------------------------------------------------|---------|--------|---------|---|---------|--------|
| P60709 ACTB_HUMAN Actin | 31 |                                                | PSIVHRK                       | 366 | 7  | 2  | 7.33   | b3°b3                                                                                                                       | 836.50  | 32.246 | 40951   | 2 | 418.76  | -7.22  |
| P60709 ACTB_HUMAN Actin | 32 |                                                | FAGDDAPR                      | 20  | 8  | 2  | 8.3    | b5°b5                                                                                                                       | 848.38  | 31.477 | 33651   | 2 | 424.70  | -5.90  |
| P60709 ACTB_HUMAN Actin | 33 |                                                | SFTTTAER                      | 198 | 8  | 2  | 8.3    | b3°b3                                                                                                                       | 912.44  | 43.199 | 15589   | 1 | 912.44  | -0.13  |
| P60709 ACTB_HUMAN Actin | 34 |                                                | VAPEEHPVLLTEAPLNPK            | 95  | 18 | 0  | 5.16   |                                                                                                                             | 1937.05 | 61.505 | 9038    | 3 | 646.35  | 7.44   |
| P63261 ACTG_HUMAN Actin | 1  |                                                | SYELPDGQVITIGNER              | 238 | 16 | 25 | 199.45 | b2b3b8b9°b9b10b11°b11b12°b12y3*y3y4y5y6*y6y7y8y10*y10y11y12°y12y13y16                                                       | 1790.90 | 71.671 | 2789179 | 2 | 895.96  | 7.02   |
| P63261 ACTG_HUMAN Actin | 2  |                                                | VAPEEHPVLLTEAPLNPK            | 95  | 18 | 27 | 195.85 | b2b4b6b10y2y3*y3y4y5*y5y6y7y8*y8y9°y9y10°y10y11y12°y12y13y14*y14y16°y16y18                                                  | 1954.06 | 61.573 | 2501157 | 3 | 652.03  | -0.69  |
| P63261 ACTG_HUMAN Actin | 3  |                                                | AGFAGDDAPR                    | 18  | 10 | 17 | 127.24 | b2b3b4b8y1y2y3y4°y4y5y6°y6y7°y7y8y9y10                                                                                      | 976.45  | 31.456 | 1944071 | 2 | 488.73  | -3.06  |
| P63261 ACTG_HUMAN Actin | 4  |                                                | EITALAPSTMK                   | 315 | 11 | 25 | 159.02 | b1b2°b2b3°b3b4°b4b5°b5b6b10b11y1y2y3y4y5°y5y6°y6y7y8y9°y9y11                                                                | 1161.62 | 50.929 | 1207932 | 2 | 581.31  | -2.21  |
| P63261 ACTG_HUMAN Actin | 5  |                                                | TTGIVMDSGDGVHTVPIYEGYALPHAILR | 147 | 30 | 34 | 275.93 | b2°b2b3°b3b4b6°b6b7b16°b16b18b26b30y2y3y5y6y7y8y9y10y11y12y14y15y16y20y22y23y24y25y26y28y30                                 | 3183.61 | 80.501 | 1157859 | 4 | 796.66  | -2.53  |
| P63261 ACTG_HUMAN Actin | 6  |                                                | AVFPSIVGRPR                   | 28  | 11 | 14 | 114.34 | b1b2b9y1y2y3y4y5y6y7y8y9y10y11                                                                                              | 1198.71 | 56.275 | 885373  | 2 | 599.86  | 1.63   |
| P63261 ACTG_HUMAN Actin | 7  | Carbamidomethyl+C(1);<br>Carbamidomethyl+C(16) | CPEALFQPSFLGMESCGIHETTENSIMK  | 256 | 28 | 43 | 296.54 | b2b3b4°b4b5b7°b7b8°b8b10b11°b11b13°b13b14b15b28y2y3y4y5*y5y6*y6y8y9y10y12°y12y13*y13y14*y14y15y16y17*y17y18°y18y21y23y24y28 | 3231.47 | 92.892 | 869739  | 3 | 1077.83 | 3.25   |
| P63261 ACTG_HUMAN Actin | 8  |                                                | DLYANTVLSGGTTMYPGIADR         | 291 | 21 | 28 | 207.33 | b2b3b4b6b10b14°b14b15°b15b18y1y2y4y5y6y7y8y9y11y12y13°y13y14y15°y15y17°y17y21                                               | 2215.08 | 77.740 | 823708  | 2 | 1108.05 | 6.17   |
| P63261 ACTG_HUMAN Actin | 9  |                                                | GYSFTTTAER                    | 196 | 10 | 15 | 88.12  | b2b3°b3b10y1y2y3y4y5y6y7°y7y8°y8y10                                                                                         | 1132.53 | 43.283 | 762297  | 2 | 566.77  | -1.62  |
| P63261 ACTG_HUMAN Actin | 10 |                                                | DSYVGDEAQSKR                  | 50  | 12 | 43 | 242.25 | b1°b1b2°b2b3°b3b4°b4b5b6b7°b7b8b9b10b11y1y2y3°y3y4°y4*y4y5°y5*y5y6°y6*y6y7°y7*y7y8°y8*y8y9°y9*y9y10°y10y11y12*y12           | 1354.62 | 24.266 | 700316  | 2 | 677.81  | -5.59  |
| P63261 ACTG_HUMAN Actin | 11 |                                                | QEYDESGPSIVHRK                | 359 | 14 | 24 | 175.06 | b3°b3b4°b4°b4b5b7°b7b14y2y3y4y5y6°y6y7y8y9y10°y10y11y12y14*y14                                                              | 1644.78 | 32.248 | 414928  | 3 | 548.93  | -11.87 |

|                               |    |                                          |                                     |     |    |    |        |                                                                                    |         |         |         |   |         |        |
|-------------------------------|----|------------------------------------------|-------------------------------------|-----|----|----|--------|------------------------------------------------------------------------------------|---------|---------|---------|---|---------|--------|
| P63261 ACTG_HUMAN Actin       | 12 |                                          | HQGVVMVGMGQK                        | 39  | 11 | 26 | 188.64 | b1b2*b2b3b4*b4b5b6b8*b8b9b10y1y2*y2y3*y3y4*y4y5y6y7y9y10*y10y11                    | 1171.57 | 33.564  | 386900  | 2 | 586.29  | 0.21   |
| P63261 ACTG_HUMAN Actin       | 13 | Carbamidomethyl+C(2)                     | LCYVALDFEQEMATAASSSSLEK             | 215 | 23 | 30 | 229.47 | b2b3b5b6b7*b7b8b9b11*b11b15b16b17y1y4y5y6y7y9y10y11*y11y12y13*y13y16*y16y17*y17y23 | 2550.20 | 92.835  | 345239  | 2 | 1275.60 | 8.81   |
| P63261 ACTG_HUMAN Actin       | 14 |                                          | QEYDESGPSIVHR                       | 359 | 13 | 6  | 78.23  | y3y4y5y6y8y11                                                                      | 1516.70 | 38.099  | 279257  | 3 | 506.24  | -0.32  |
| P63261 ACTG_HUMAN Actin       | 15 |                                          | KDLYANTVLSGGTTMYPGIADR              | 290 | 22 | 23 | 143.31 | b3b4b7*b7b8b9b16*b16b22y1y2y3y5y6y7y8y10y12y13*y13y14*y14y22                       | 2343.17 | 69.147  | 206145  | 3 | 781.73  | 0.52   |
| P63261 ACTG_HUMAN Actin       | 16 |                                          | IIAPPERK                            | 328 | 8  | 11 | 76.24  | b2b3y2y3y4*y4y5y6*y6y7y8                                                           | 923.56  | 26.997  | 133691  | 2 | 462.28  | -8.33  |
| P63261 ACTG_HUMAN Actin       | 17 | Carbamidomethyl+C(1)                     | CDVDIRK                             | 284 | 7  | 12 | 93.92  | b1b2*b2b3b4b5y3y4*y4y5y6y7                                                         | 905.44  | 22.935  | 126991  | 2 | 453.22  | -9.91  |
| P63261 ACTG_HUMAN Actin       | 18 |                                          | DSYVGDEAQS                          | 50  | 11 | 4  | 37.02  | b5b9b10y9                                                                          | 1198.52 | 26.159  | 22055   | 1 | 1198.52 | 1.73   |
| P63261 ACTG_HUMAN Actin       | 19 |                                          | YPIEHGIVTNWDDMEK                    | 68  | 16 | 3  | 25.7   | b4b5b8                                                                             | 1946.93 | 67.792  | 30321   | 2 | 973.97  | 18.68  |
| P63261 ACTG_HUMAN Actin       | 20 | Carbamidomethyl+C(16)                    | EEEEIALVIDNGSGMCK                   | 1   | 17 | 4  | 16.48  | b5b15y16*y16                                                                       | 1835.84 | 91.704  | 6145    | 3 | 612.62  | -5.72  |
| P63261 ACTG_HUMAN Actin       | 21 |                                          | MTQIMFETFNTPAMYVAIQAVLSL<br>YASGR   | 118 | 29 | 3  | 11.6   | b6y4y7                                                                             | 3253.66 | 133.944 | 1801    | 3 | 1085.22 | 15.61  |
| P63261 ACTG_HUMAN Actin       | 22 | Carbamidomethyl+C(17)<br>;Oxidation+M(1) | MEEEIAALVIDNGSGMCK                  | 0   | 18 | 4  | 15.73  | b14y11y17*y17                                                                      | 1982.89 | 67.195  | 379508  | 3 | 661.63  | 1.11   |
| P63261 ACTG_HUMAN Actin       | 23 | Oxidation+M()                            | TTGIVMDSGDGVHTHTVPIYEGYA<br>LPHAILR | 147 | 30 | 4  | 14.32  | b13b16y6y14                                                                        | 3199.60 | 77.327  | 69531   | 4 | 800.66  | -2.14  |
| P63261 ACTG_HUMAN Actin       | 24 | Oxidation+M()                            | LDLAGRDLTDYLMK                      | 177 | 14 | 4  | 19.47  | b3b7y6*y6                                                                          | 1639.84 | 90.111  | 30010   | 2 | 820.42  | 1.34   |
| P63261 ACTG_HUMAN Actin       | 25 |                                          | FPSIVGRPR                           | 30  | 9  | 4  | 22     | b3*b3b4*b4                                                                         | 1028.60 | 56.304  | 1259678 | 2 | 514.80  | -1.54  |
| P63261 ACTG_HUMAN Actin       | 26 |                                          | PSIVGRPR                            | 31  | 8  | 4  | 31.5   | b3*b3b4b6                                                                          | 881.52  | 56.301  | 518283  | 2 | 441.26  | -11.63 |
| P63261 ACTG_HUMAN Actin       | 27 |                                          | YVGDEAQS                            | 52  | 10 | 5  | 48.21  | b4b5*b5b8b9                                                                        | 1152.56 | 24.270  | 94467   | 2 | 576.78  | -3.71  |
| P63261 ACTG_HUMAN Actin       | 28 |                                          | VFPSIVGRPR                          | 29  | 10 | 0  | 2.38   |                                                                                    | 1127.67 | 56.311  | 90391   | 2 | 564.34  | 1.62   |
| P63261 ACTG_HUMAN Actin       | 29 |                                          | PEEHPVLLTEAPLNPK                    | 97  | 16 | 8  | 72.05  | b3b5b6b9*b9b10b11b13                                                               | 1783.96 | 61.545  | 88780   | 3 | 595.32  | -1.98  |
| P63261 ACTG_HUMAN Actin       | 30 |                                          | VGDEAQS                             | 53  | 9  | 6  | 45.2   | b3b5b6b8*b8*b8                                                                     | 989.50  | 24.251  | 83527   | 2 | 495.25  | -0.56  |
| P63261 ACTG_HUMAN Actin       | 31 |                                          | GPSIVHRK                            | 365 | 8  | 3  | 15.71  | b3*b3b6                                                                            | 893.53  | 32.223  | 78762   | 2 | 447.27  | -7.10  |
| P63261 ACTG_HUMAN Actin       | 32 |                                          | AGDDAPR                             | 21  | 7  | 4  | 37.12  | b3b4b5*b5                                                                          | 701.32  | 31.488  | 56095   | 1 | 701.32  | -0.09  |
| P63261 ACTG_HUMAN Actin       | 33 |                                          | GDEAQS                              | 54  | 8  | 3  | 21.6   | b3b4*b4                                                                            | 890.43  | 24.272  | 45433   | 2 | 445.72  | -7.13  |
| P63261 ACTG_HUMAN Actin       | 34 |                                          | IAPPERK                             | 329 | 7  | 0  | 1.19   |                                                                                    | 810.48  | 27.006  | 36435   | 2 | 405.74  | -8.06  |
| P63261 ACTG_HUMAN Actin       | 35 |                                          | TALAPSTMK                           | 317 | 9  | 1  | 7.9    | b6                                                                                 | 919.49  | 50.935  | 16978   | 1 | 919.49  | 3.45   |
| P63261 ACTG_HUMAN Actin       | 36 |                                          | SIVGRPR                             | 32  | 7  | 3  | 31.5   | b3b5b6                                                                             | 784.47  | 56.300  | 15882   | 2 | 392.74  | -6.77  |
| P63261 ACTG_HUMAN Actin       | 37 |                                          | LAPSTMK                             | 319 | 7  | 1  | 7.9    | b4                                                                                 | 747.41  | 51.010  | 10543   | 1 | 747.41  | 3.43   |
| P63261 ACTG_HUMAN Actin       | 38 |                                          | MVGMGQK                             | 43  | 7  | 1  | 7.9    | b6                                                                                 | 750.37  | 33.493  | 10417   | 1 | 750.37  | 6.02   |
| P63261 ACTG_HUMAN Actin       | 39 |                                          | GFAGDDAPR                           | 19  | 9  | 1  | 8.3    | b4                                                                                 | 905.41  | 31.494  | 3744    | 1 | 905.41  | -0.54  |
| P63261 ACTG_HUMAN Actin       | 40 |                                          | YDESGPSIVHR                         | 361 | 11 | 0  | 3.17   |                                                                                    | 1259.60 | 38.178  | 2462    | 2 | 630.30  | 0.87   |
| P63261 ACTG_HUMAN Actin       | 41 |                                          | YDESGPSIVHRK                        | 361 | 12 | 1  | 7.33   | b3                                                                                 | 1387.69 | 32.235  | 1997    | 3 | 463.24  | -3.43  |
| P63261 ACTG_HUMAN Actin       | 42 |                                          | DEAQS                               | 55  | 7  | 2  | 7.63   | b3*b3                                                                              | 833.40  | 24.253  | 1816    | 2 | 417.20  | -13.18 |
| P63261 ACTG_HUMAN Actin       | 43 |                                          | GYSFTTAE                            | 196 | 10 | 0  | 1.98   |                                                                                    | 1114.52 | 43.304  | 20134   | 2 | 557.76  | 7.45   |
| P07737 PROF1_HUMAN Profilin-1 | 1  |                                          | TFVNITPAEVGLVVGK                    | 38  | 16 | 22 | 141.76 | b2*b2b3b4*b4b5*b5*b5b6*b6*b6b12b14y2y3y6y7y10y11y12y13y16                          | 1643.94 | 86.235  | 331299  | 2 | 822.47  | 2.30   |
| P07737 PROF1_HUMAN Profilin-1 | 2  |                                          | STGGAPTFNVTVTK                      | 91  | 14 | 12 | 39.39  | b2*b2b5*b5b10*b10b14y1y9y10y12y14                                                  | 1379.72 | 52.330  | 295894  | 2 | 690.36  | 2.57   |

|                                 |    |                                             |                                         |     |    |    |        |                                                                                    |         |         |        |   |         |        |
|---------------------------------|----|---------------------------------------------|-----------------------------------------|-----|----|----|--------|------------------------------------------------------------------------------------|---------|---------|--------|---|---------|--------|
| P07737 PROF1_HUMAN Profilin-1   | 3  |                                             | SSFYVNGLTLGGQK                          | 56  | 14 | 20 | 164.76 | b3°b3b5°b5b9°b9°b9b13b14y3y4y5y6y7y8y9y10y11*y11y14                                | 1470.77 | 67.795  | 283844 | 2 | 735.89  | 4.81   |
| P07737 PROF1_HUMAN Profilin-1   | 4  |                                             | TFVNITPAEVLVGVKDR                       | 38  | 18 | 14 | 88.25  | b2°b2b3°b3b4b5°b5y5y6y8y13y15y16y18                                                | 1915.06 | 80.446  | 222518 | 3 | 639.02  | -4.21  |
| P07737 PROF1_HUMAN Profilin-1   | 5  |                                             | TLVLLMGK                                | 108 | 8  | 9  | 94.32  | b3b4b5y2y3y4y5y6y8                                                                 | 874.53  | 69.427  | 196056 | 2 | 437.77  | -9.77  |
| P07737 PROF1_HUMAN Profilin-1   | 6  |                                             | DSPSVWAAVPGK                            | 26  | 12 | 10 | 83.35  | b8b9y1y2y3y4y6y7y10y12                                                             | 1213.63 | 59.274  | 142406 | 2 | 607.32  | 3.52   |
| P07737 PROF1_HUMAN Profilin-1   | 7  | Carbamidomethyl+C(1)                        | CYEMASHLR                               | 127 | 9  | 5  | 30.71  | b1b8y4y8y9                                                                         | 1166.51 | 28.997  | 4606   | 1 | 1166.51 | -0.63  |
| P07737 PROF1_HUMAN Profilin-1   | 8  | Carbamidomethyl+C(16)                       | AGWNAYIDNLMADGTCQDAIV<br>GYK            | 1   | 25 | 4  | 19.02  | b3b12b14y12                                                                        | 2717.25 | 102.975 | 3700   | 3 | 906.42  | 6.47   |
| P07737 PROF1_HUMAN Profilin-1   | 9  |                                             | DRSSFYVNGLTLGGQK                        | 54  | 16 | 4  | 25.7   | b6b11b12°b12                                                                       | 1741.86 | 91.545  | 12546  | 2 | 871.44  | -13.60 |
| P07737 PROF1_HUMAN Profilin-1   | 10 |                                             | EGVHGLINKK                              | 116 | 11 | 9  | 70.44  | b4°b4b5°b5y3*y3y4y7y10                                                             | 1151.64 | 30.574  | 6215   | 3 | 384.55  | -14.95 |
| P07737 PROF1_HUMAN Profilin-1   | 11 | Carbamidomethyl+C(2)                        | KCYEMASHLR                              | 126 | 10 | 3  | 34.11  | y3y5y6                                                                             | 1294.59 | 50.454  | 3523   | 3 | 432.20  | -8.11  |
| P07737 PROF1_HUMAN Profilin-1   | 12 |                                             | DSLQDGEFSMDLRK                          | 75  | 16 | 3  | 17.33  | b6b11y12                                                                           | 1854.91 | 74.773  | 2492   | 3 | 618.98  | 11.65  |
| P07737 PROF1_HUMAN Profilin-1   | 13 | Carbamidomethyl+C(16)<br>:Phosphoryl STY(6) | AGWNAYIDNLMADGTCQDAIV<br>GYKSPSVWAAVPGK | 1   | 37 | 11 | 80.28  | b3b4y3y7y12y23y24y25y27y29y31                                                      | 3991.79 | 105.305 | 215618 | 4 | 998.70  | -1.96  |
| P37802 TAGL2_HUMAN Transgelin-2 | 1  |                                             | YGINTTDIFQTVDLWEGK                      | 102 | 18 | 29 | 217.31 | b2b3b4b5°b5b7b10b12b13°b13b14°b14y2y3°y3y4y5y6y8y10*y10y12*y12y13y14y15°y15*y15y18 | 2100.03 | 101.205 | 280716 | 2 | 1050.52 | 2.21   |
| P37802 TAGL2_HUMAN Transgelin-2 | 2  | Carbamidomethyl+C(6)                        | DGTVLCELINALYPEGQAPVKK                  | 57  | 22 | 26 | 153.88 | b2°b2b3°b3b4°b4b5°b5b6b10b11°b11b13°b13b22y2y4y5y7y9y10y14y16y17y18y22             | 2415.25 | 106.119 | 272250 | 3 | 805.76  | -1.62  |
| P37802 TAGL2_HUMAN Transgelin-2 | 3  |                                             | TLMNLGGLAVAR                            | 127 | 12 | 11 | 80.34  | b2b3b4°b4y2y4y7y8y9y10y12                                                          | 1215.69 | 73.327  | 266981 | 2 | 608.35  | 1.21   |
| P37802 TAGL2_HUMAN Transgelin-2 | 4  |                                             | DDGLFSGDPNWFPPK                         | 139 | 14 | 10 | 45.62  | b2b3b4b14y2y3y6*y6y9y14                                                            | 1594.73 | 87.751  | 192400 | 2 | 797.87  | 4.90   |
| P37802 TAGL2_HUMAN Transgelin-2 | 5  |                                             | QMEQISQFLQAAER                          | 88  | 14 | 18 | 140.89 | b3°b3°b3b4°b4°b4b14y3y4y5*y5y6y7y8y9y11y12y14                                      | 1678.83 | 81.076  | 161062 | 2 | 839.92  | 5.31   |
| P37802 TAGL2_HUMAN Transgelin-2 | 6  |                                             | DDGLFSGDPNWFPPK                         | 139 | 15 | 9  | 43.46  | b2b3°b3b4y2y3y4y7y15                                                               | 1722.80 | 77.101  | 140820 | 3 | 574.94  | -5.88  |
| P37802 TAGL2_HUMAN Transgelin-2 | 7  |                                             | ENFQNWLK                                | 49  | 8  | 6  | 41.1   | y1y3y4y5*y5y8                                                                      | 1078.53 | 67.130  | 130002 | 2 | 539.77  | -1.70  |
| P37802 TAGL2_HUMAN Transgelin-2 | 8  |                                             | NFSDNQLQEGK                             | 160 | 11 | 15 | 90.74  | b1°b1b4y1y2y3°y3y4°y4y5y7y8y9*y9y11                                                | 1279.59 | 36.767  | 125293 | 2 | 640.30  | 0.19   |
| P37802 TAGL2_HUMAN Transgelin-2 | 9  |                                             | GPAYGLSR                                | 4   | 8  | 7  | 41.1   | b2y1y4y6y7°y7y8                                                                    | 820.43  | 33.565  | 66359  | 2 | 410.72  | -5.65  |
| P37802 TAGL2_HUMAN Transgelin-2 | 10 | Carbamidomethyl+C(18)                       | QYDADLEQILIQWITTQCRK                    | 20  | 20 | 11 | 54.77  | b1b2°b2b20y4y6y9y10y16y18y20                                                       | 2522.27 | 108.790 | 54606  | 3 | 841.43  | 0.19   |
| P37802 TAGL2_HUMAN Transgelin-2 | 11 | Carbamidomethyl+C(18)                       | QYDADLEQILIQWITTQCR                     | 20  | 19 | 19 | 150.31 | b3°b3b9°b9b10b11y2y3y4y5y6°y6y7°y7y8y9y10y11y19                                    | 2394.17 | 116.226 | 49887  | 3 | 798.73  | -2.45  |

|                                     |    |                                             |                                |     |    |    |        |                                                                                        |         |         |         |   |         |        |
|-------------------------------------|----|---------------------------------------------|--------------------------------|-----|----|----|--------|----------------------------------------------------------------------------------------|---------|---------|---------|---|---------|--------|
| P37802 TAGL2_HUMAN Transgelin-2     | 12 |                                             | GASQAGMTGYGMMPR                | 182 | 14 | 8  | 51.14  | b3°b3b5y6y7°y7y9y12                                                                    | 1383.62 | 45.232  | 13411   | 2 | 692.31  | 3.88   |
| P37802 TAGL2_HUMAN Transgelin-2     | 13 |                                             | IQASTMAFK                      | 79  | 9  | 7  | 68.11  | y3y5y6y7y8°y8*y8                                                                       | 996.51  | 46.253  | 144884  | 2 | 498.76  | -3.98  |
| P37802 TAGL2_HUMAN Transgelin-2     | 14 |                                             | DVGRPQPGRENFQNWLK              | 40  | 17 | 5  | 27.64  | b11°b11y7y12y13                                                                        | 2041.01 | 72.904  | 65516   | 2 | 1021.01 | -11.78 |
| P37802 TAGL2_HUMAN Transgelin-2     | 15 |                                             | ENPRNFSDNQLQEGK                | 156 | 15 | 6  | 43.46  | b5b6y3°y3y6y13                                                                         | 1775.81 | 73.921  | 9344    | 3 | 592.61  | -14.16 |
| P37802 TAGL2_HUMAN Transgelin-2     | 16 |                                             | NVIGLQMGNTNRGASQAGMTGYG<br>MPR | 171 | 25 | 4  | 12.51  | b14°b14y5y8                                                                            | 2567.20 | 104.018 | 6330    | 3 | 856.41  | -9.80  |
| P37802 TAGL2_HUMAN Transgelin-2     | 17 | Carbamidomethyl+C(21)                       | IEKQYDADLEQILIQWTTQCR          | 17  | 22 | 3  | 13.56  | b11y5y8                                                                                | 2764.39 | 110.109 | 3867    | 3 | 922.13  | -4.33  |
| P37802 TAGL2_HUMAN Transgelin-2     | 18 | Carbamidomethyl+C(6);<br>Phosphoryl STY(13) | DGTVLCELINALYPEGQAPVK          | 57  | 21 | 3  | 14.01  | b9b11y8                                                                                | 2367.13 | 44.941  | 5375    | 4 | 592.54  | 2.99   |
| P37802 TAGL2_HUMAN Transgelin-2     | 19 | Oxidation+M(2)                              | QMEQISQFLQAAER                 | 88  | 14 | 5  | 31.01  | b5b7°b7b8y12                                                                           | 1694.84 | 92.948  | 2810    | 2 | 847.92  | 13.25  |
| P37802 TAGL2_HUMAN Transgelin-2     | 20 |                                             | FSGDPNWFPPKK                   | 143 | 11 | 1  | 7.27   | b10                                                                                    | 1322.67 | 77.110  | 14640   | 2 | 661.84  | 13.29  |
| P37802 TAGL2_HUMAN Transgelin-2     | 21 |                                             | PEGQAPVKK                      | 70  | 9  | 7  | 40.37  | b4°b4b5°b5b7°b7b8                                                                      | 953.54  | 106.118 | 6308    | 2 | 477.27  | 1.02   |
| P37802 TAGL2_HUMAN Transgelin-2     | 22 |                                             | DDGLFSGDPNWFPPKK               | 139 | 15 | 1  | 7.27   | y14                                                                                    | 1704.80 | 77.020  | 5345    | 3 | 568.94  | 0.86   |
| P02776 PLF4_HUMAN Platelet factor 4 | 1  |                                             | HITSLEVIK                      | 53  | 9  | 16 | 134.63 | b1b2b3b4°b4b5°b5b6b7<br>y2y3y4y6y7y8y9                                                 | 1039.61 | 48.514  | 375971  | 2 | 520.31  | -3.52  |
| P02776 PLF4_HUMAN Platelet factor 4 | 2  | Carbamidomethyl+C(5)                        | AGPHCPTAQLIATLK                | 62  | 15 | 15 | 153.12 | b4b5b7°b7b8b9b10y3y4<br>y5y6y7y8y11y15                                                 | 1577.84 | 61.301  | 344982  | 3 | 526.62  | -6.58  |
| P02776 PLF4_HUMAN Platelet factor 4 | 3  | Carbamidomethyl+C(2)                        | ICLDLQAPLYKK                   | 81  | 12 | 14 | 131.05 | b2b3b4b5b6b7y1y2y3y5<br>y6y8y10y12                                                     | 1461.79 | 65.985  | 215916  | 3 | 487.94  | -13.19 |
| P02776 PLF4_HUMAN Platelet factor 4 | 4  | Carbamidomethyl+C(2)                        | ICLDLQAPLYK                    | 81  | 11 | 8  | 47.82  | b2y2y4y8y9y10°y10y11                                                                   | 1333.72 | 74.001  | 116227  | 2 | 667.36  | 0.73   |
| P02776 PLF4_HUMAN Platelet factor 4 | 5  | Carbamidomethyl+C(3)                        | KICLDLQAPLYK                   | 80  | 12 | 4  | 36.45  | b3b5y4y5                                                                               | 1461.83 | 67.709  | 68406   | 2 | 731.42  | 9.35   |
| P02776 PLF4_HUMAN Platelet factor 4 | 6  |                                             | LDLQAPLYKK                     | 83  | 10 | 1  | 7.63   | b3                                                                                     | 1188.69 | 65.974  | 2500    | 2 | 594.85  | -10.68 |
| P62736 ACTA_HUMAN Actin             | 1  |                                             | SYELPDGQVITIGNER               | 240 | 16 | 25 | 199.45 | b2b3b8b9°b9b10b11°b1<br>1b12°b12y3*y3y4y5y6*<br>y6y7y8y10*y10y11y12°<br>y12y13y16      | 1790.90 | 71.671  | 2789179 | 2 | 895.96  | 7.02   |
| P62736 ACTA_HUMAN Actin             | 2  |                                             | YPIEHGIITNWDDMEK               | 70  | 16 | 28 | 181.37 | b2b8b9°b9b11°b11b12b<br>13°b13b14y1y2°y2y3y4<br>y5y6y7°y7y8*y8y12<br>y14y15*y15y16*y16 | 1960.91 | 67.185  | 2687619 | 3 | 654.31  | -1.49  |
| P62736 ACTA_HUMAN Actin             | 3  |                                             | AGFAGDDAPR                     | 20  | 10 | 17 | 127.24 | b2b3b4b8y1y2y3y4°y4y<br>5y6°y6y7°y7y8y9y10                                             | 976.45  | 31.456  | 1944071 | 2 | 488.73  | -3.06  |
| P62736 ACTA_HUMAN Actin             | 4  |                                             | EITALAPSTMK                    | 317 | 11 | 25 | 159.02 | b1b2°b2b3°b3b4°b4b5°<br>b5b6b10b11y1y2y3y4y5<br>°y5y6°y6y7y8y9°y9y11                   | 1161.62 | 50.929  | 1207932 | 2 | 581.31  | -2.21  |
| P62736 ACTA_HUMAN Actin             | 5  |                                             | AVFPSIVGRPR                    | 30  | 11 | 14 | 114.34 | b1b2b9y1y2y3y4y5y6y7<br>y8y9y10y11                                                     | 1198.71 | 56.275  | 885373  | 2 | 599.86  | 1.63   |

|                         |    |                      |                               |     |    |    |        |                                                                                                                   |         |         |         |   |         |       |
|-------------------------|----|----------------------|-------------------------------|-----|----|----|--------|-------------------------------------------------------------------------------------------------------------------|---------|---------|---------|---|---------|-------|
| P62736 ACTA_HUMAN Actin | 6  |                      | DSYVGDEAQSQR                  | 52  | 12 | 43 | 242.25 | b1°b1b2°b2b3°b3b4°b4b5b6b7°b7b8b9b10b11y1y2y3°y3y4°y4°y4y5°y5°y5y6°y6°y6y7°y7°y7y8°y8°y8y9°y9°y9y10°y10y11y12°y12 | 1354.62 | 24.266  | 700316  | 2 | 677.81  | -5.59 |
| P62736 ACTA_HUMAN Actin | 7  |                      | HQGVMVGMGQK                   | 41  | 11 | 26 | 188.64 | b1b2°b2b3b4°b4b5b6b8°b8b9b10y1y2°y2y3°y3y4°y4y5y6y7y9y10°y10y11                                                   | 1171.57 | 33.564  | 386900  | 2 | 586.29  | 0.21  |
| P62736 ACTA_HUMAN Actin | 8  |                      | IIAPPERK                      | 330 | 8  | 11 | 76.24  | b2b3y2y3y4°y4y5y6°y6y7y8                                                                                          | 923.56  | 26.997  | 133691  | 2 | 462.28  | -8.33 |
| P62736 ACTA_HUMAN Actin | 9  |                      | DSYVGDEAQSQR                  | 52  | 11 | 4  | 37.02  | b5b9b10y9                                                                                                         | 1198.52 | 26.159  | 22055   | 1 | 1198.52 | 1.73  |
| P62736 ACTA_HUMAN Actin | 10 | Carbamidomethyl+C(1) | CPETLFPQPSFIGMESAGIHETTYNSIMK | 258 | 28 | 4  | 15.07  | b8b10y7y9                                                                                                         | 3188.47 | 107.920 | 3058    | 4 | 797.87  | -1.76 |
| P62736 ACTA_HUMAN Actin | 11 | Phosphoryl STY()     | YSVWIGGSILASLSTFQQMWISK       | 338 | 23 | 7  | 29.76  | b3°b3b6b7°b7b11y10                                                                                                | 2682.31 | 115.738 | 4138    | 3 | 894.78  | 7.46  |
| P62736 ACTA_HUMAN Actin | 12 | Phosphoryl STY()     | MTQIMFETFNVPAMYVAIQAVLSLYASGR | 120 | 29 | 4  | 35.51  | b4b5b6y23                                                                                                         | 3331.58 | 125.920 | 2912    | 3 | 1111.20 | -3.30 |
| P62736 ACTA_HUMAN Actin | 13 |                      | DSYVGDEAQSQR                  | 52  | 12 | 0  | 2.78   |                                                                                                                   | 1337.60 | 24.274  | 21494   | 3 | 446.54  | 7.48  |
| P62736 ACTA_HUMAN Actin | 14 |                      | AGFAGDDAPR                    | 20  | 10 | 0  | 1.98   |                                                                                                                   | 958.43  | 31.443  | 14573   | 2 | 479.72  | -5.09 |
| P68032 ACTC_HUMAN Actin | 1  |                      | SYELPDGQVITIGNER              | 240 | 16 | 25 | 199.45 | b2b3b8b9°b9b10b11°b11b12°b12y3°y3y4y5y6°y6y7y8y10°y10y11y12°y12y13y16                                             | 1790.90 | 71.671  | 2789179 | 2 | 895.96  | 7.02  |
| P68032 ACTC_HUMAN Actin | 2  |                      | YPIEHGIITNWDDMEK              | 70  | 16 | 28 | 181.37 | b2b8b9°b9b11°b11b12b13°b13b14y1y2°y2y3y4y5y6y7°y7°y7y8°y8y12y14y15°y15y16°y16                                     | 1960.91 | 67.185  | 2687619 | 3 | 654.31  | -1.49 |
| P68032 ACTC_HUMAN Actin | 3  |                      | AGFAGDDAPR                    | 20  | 10 | 17 | 127.24 | b2b3b4b8y1y2y3y4°y4y5y6°y6y7°y7y8y9y10                                                                            | 976.45  | 31.456  | 1944071 | 2 | 488.73  | -3.06 |
| P68032 ACTC_HUMAN Actin | 4  |                      | EITALAPSTMK                   | 317 | 11 | 25 | 159.02 | b1b2°b2b3°b3b4°b4b5°b5b6b10b11y1y2y3y4y5°y5y6°y6y7y8y9°y9y11                                                      | 1161.62 | 50.929  | 1207932 | 2 | 581.31  | -2.21 |
| P68032 ACTC_HUMAN Actin | 5  |                      | AVFPSIVGRPR                   | 30  | 11 | 14 | 114.34 | b1b2b9y1y2y3y4y5y6y7y8y9y10y11                                                                                    | 1198.71 | 56.275  | 885373  | 2 | 599.86  | 1.63  |
| P68032 ACTC_HUMAN Actin | 6  |                      | DSYVGDEAQSQR                  | 52  | 12 | 43 | 242.25 | b1°b1b2°b2b3°b3b4°b4b5b6b7°b7b8b9b10b11y1y2y3°y3y4°y4°y4y5°y5°y5y6°y6°y6y7°y7°y7y8°y8°y8y9°y9°y9y10°y10y11y12°y12 | 1354.62 | 24.266  | 700316  | 2 | 677.81  | -5.59 |
| P68032 ACTC_HUMAN Actin | 7  |                      | HQGVMVGMGQK                   | 41  | 11 | 26 | 188.64 | b1b2°b2b3b4°b4b5b6b8°b8b9b10y1y2°y2y3°y3y4°y4y5y6y7y9y10°y10y11                                                   | 1171.57 | 33.564  | 386900  | 2 | 586.29  | 0.21  |
| P68032 ACTC_HUMAN Actin | 8  |                      | IIAPPERK                      | 330 | 8  | 11 | 76.24  | b2b3y2y3y4°y4y5y6°y6y7y8                                                                                          | 923.56  | 26.997  | 133691  | 2 | 462.28  | -8.33 |
| P68032 ACTC_HUMAN Actin | 9  |                      | DSYVGDEAQSQR                  | 52  | 11 | 4  | 37.02  | b5b9b10y9                                                                                                         | 1198.52 | 26.159  | 22055   | 1 | 1198.52 | 1.73  |
| P68032 ACTC_HUMAN Actin | 10 | Carbamidomethyl+C(1) | CPETLFPQPSFIGMESAGIHETTYNSIMK | 258 | 28 | 4  | 15.07  | b8b10y7y9                                                                                                         | 3188.47 | 107.920 | 3058    | 4 | 797.87  | -1.76 |

|                         |    |                                                |                                        |     |    |    |        |                                                                                                                                       |         |         |         |   |         |        |
|-------------------------|----|------------------------------------------------|----------------------------------------|-----|----|----|--------|---------------------------------------------------------------------------------------------------------------------------------------|---------|---------|---------|---|---------|--------|
| P68032 ACTC_HUMAN Actin | 11 | Carbamidomethyl+C(1);<br>Carbamidomethyl+C(29) | CPETLFQPSFIGMESAGIHETTYNS<br>IMKCDIDIR | 258 | 34 | 10 | 37.25  | b11°b11*b11b12b14b18<br>y6y10°y10y11                                                                                                  | 3960.84 | 96.309  | 187040  | 4 | 990.97  | 3.02   |
| P68032 ACTC_HUMAN Actin | 12 |                                                | GILTLKYPIEHGIITNWDDMEK                 | 64  | 22 | 10 | 84.6   | y4y5y6y7y8y12°y12y14<br>*y14y15                                                                                                       | 2586.30 | 83.446  | 75515   | 4 | 647.33  | -11.52 |
| P68032 ACTC_HUMAN Actin | 13 |                                                | KDLYANNVLSGGTTMYPGIADR                 | 292 | 22 | 5  | 27.13  | b7b9y7y8°y8                                                                                                                           | 2356.16 | 57.065  | 35039   | 3 | 786.06  | -2.18  |
| P68032 ACTC_HUMAN Actin | 14 |                                                | YPIEHGIITNWDDMEKIWHHTFYN<br>ELR        | 70  | 27 | 5  | 26.23  | b4b17y8y10y11                                                                                                                         | 3457.60 | 102.791 | 2775    | 3 | 1153.21 | -11.72 |
| P68032 ACTC_HUMAN Actin | 15 | Carbamidomethyl+C(4)                           | EKLCYVALDFENEMATAASSSSLE<br>K          | 215 | 25 | 5  | 19.02  | b11y3y15*y15y22                                                                                                                       | 2793.26 | 103.013 | 1749    | 3 | 931.76  | -13.55 |
| P68032 ACTC_HUMAN Actin | 16 | Phosphoryl STY()                               | KDLYANNVLSGGTTMYPGIADR                 | 292 | 22 | 6  | 21.08  | b5°b5b11b13y7°y7                                                                                                                      | 2436.11 | 63.770  | 11672   | 3 | 812.71  | -1.70  |
| P68032 ACTC_HUMAN Actin | 17 | Carbamidomethyl+C(2);<br>Oxidation+M()         | LCYVALDFENEMATAASSSSLEK                | 217 | 23 | 6  | 33.87  | b10°b10b11y8y11y15                                                                                                                    | 2552.19 | 87.479  | 6585    | 3 | 851.40  | 15.02  |
| P68032 ACTC_HUMAN Actin | 18 | Oxidation+M()                                  | YPIEHGIITNWDDMEK                       | 70  | 16 | 4  | 25.03  | b5°b5b7b11                                                                                                                            | 1976.92 | 85.085  | 2348    | 2 | 988.96  | 5.93   |
| P68133 ACTS_HUMAN Actin | 1  |                                                | SYELPDGQVITIGNER                       | 240 | 16 | 25 | 199.45 | b2b3b8b9°b9b10b11°b1<br>1b12°b12y3°y3y4y5y6*<br>y6y7y8y10*y10y11y12°<br>y12y13y16                                                     | 1790.90 | 71.671  | 2789179 | 2 | 895.96  | 7.02   |
| P68133 ACTS_HUMAN Actin | 2  |                                                | YPIEHGIITNWDDMEK                       | 70  | 16 | 28 | 181.37 | b2b8b9°b9b11°b11b12b<br>13°b13b14y1y2°y2y3y4<br>y5y6y7°y7°y7y8*y8y12<br>y14y15*y15y16*y16                                             | 1960.91 | 67.185  | 2687619 | 3 | 654.31  | -1.49  |
| P68133 ACTS_HUMAN Actin | 3  |                                                | AGFAGDDAPR                             | 20  | 10 | 17 | 127.24 | b2b3b4b8y1y2y3y4°y4y<br>5y6°y6y7°y7y8y9y10                                                                                            | 976.45  | 31.456  | 1944071 | 2 | 488.73  | -3.06  |
| P68133 ACTS_HUMAN Actin | 4  |                                                | EITALAPSTMK                            | 317 | 11 | 25 | 159.02 | b1b2°b2b3°b3b4°b4b5°<br>b5b6b10b11y1y2y3y4y5<br>°y5y6°y6y7y8y9°y9y11                                                                  | 1161.62 | 50.929  | 1207932 | 2 | 581.31  | -2.21  |
| P68133 ACTS_HUMAN Actin | 5  |                                                | AVFPSIVGRPR                            | 30  | 11 | 14 | 114.34 | b1b2b9y1y2y3y4y5y6y7<br>y8y9y10y11                                                                                                    | 1198.71 | 56.275  | 885373  | 2 | 599.86  | 1.63   |
| P68133 ACTS_HUMAN Actin | 6  |                                                | DSYVGDEAQSQR                           | 52  | 12 | 43 | 242.25 | b1°b1b2°b2b3°b3b4°b4<br>b5b6b7°b7b8b9b10b11y<br>1y2y3°y3y4°y4°y4y5°y5<br>*y5y6°y6°y6y7°y7°y7y<br>8°y8*y8y9°y9°y9y10°y1<br>0y11y12*y12 | 1354.62 | 24.266  | 700316  | 2 | 677.81  | -5.59  |
| P68133 ACTS_HUMAN Actin | 7  |                                                | HQGVVMVGMGQK                           | 41  | 11 | 26 | 188.64 | b1b2°b2b3b4°b4b5b6b<br>8°b8b9b10y1y2°y2y3°y<br>3y4°y4y5y6y7y9y10*y1<br>0y11                                                           | 1171.57 | 33.564  | 386900  | 2 | 586.29  | 0.21   |
| P68133 ACTS_HUMAN Actin | 8  |                                                | IIAPPERK                               | 330 | 8  | 11 | 76.24  | b2b3y2y3y4°y4y5y6°y6<br>y7y8                                                                                                          | 923.56  | 26.997  | 133691  | 2 | 462.28  | -8.33  |
| P68133 ACTS_HUMAN Actin | 9  |                                                | DSYVGDEAQSQR                           | 52  | 11 | 4  | 37.02  | b5b9b10y9                                                                                                                             | 1198.52 | 26.159  | 22055   | 1 | 1198.52 | 1.73   |
| P68133 ACTS_HUMAN Actin | 10 | Carbamidomethyl+C(1)                           | CPETLFQPSFIGMESAGIHETTYNS<br>IMK       | 258 | 28 | 4  | 15.07  | b8b10y7y9                                                                                                                             | 3188.47 | 107.920 | 3058    | 4 | 797.87  | -1.76  |
| P68133 ACTS_HUMAN Actin | 11 |                                                | YSVWIGGSILASLSTFQMQWITK                | 338 | 23 | 4  | 13.16  | b6b14y8*y8                                                                                                                            | 2616.33 | 124.335 | 38997   | 3 | 872.78  | -7.93  |
| P68133 ACTS_HUMAN Actin | 12 | Carbamidomethyl+C(1);<br>Phosphoryl STY()      | CPETLFQPSFIGMESAGIHETTYNS<br>IMK       | 258 | 28 | 7  | 49.49  | b3b7b8y8y9y10°y10                                                                                                                     | 3268.42 | 87.840  | 23377   | 4 | 817.86  | -2.32  |

|                                                 |    |                      |                                  |     |    |    |        |                                                                                                                                       |         |         |         |   |         |       |
|-------------------------------------------------|----|----------------------|----------------------------------|-----|----|----|--------|---------------------------------------------------------------------------------------------------------------------------------------|---------|---------|---------|---|---------|-------|
| P68133 ACTS_HUMAN Actin                         | 13 | Phosphoryl STY(14)   | YSVWIGGSILASLSTFQQMWITK          | 338 | 23 | 6  | 37.89  | b12b15b16_H3PO4<br>b16_HPO3<br>b16b17y16_H3PO4<br>y16°y16                                                                             | 2696.30 | 136.773 | 6652    | 2 | 1348.66 | -2.26 |
| P68133 ACTS_HUMAN Actin                         | 14 |                      | EITALAPSTMK                      | 317 | 11 | 0  | 2.38   |                                                                                                                                       | 1143.61 | 50.950  | 42564   | 2 | 572.31  | 3.63  |
| P63267 ACTH_HUMAN Actin                         | 1  |                      | SYELPDGQVITIGNER                 | 239 | 16 | 25 | 199.45 | b2b3b8b9°b9b10b11°b1<br>1b12°b12y3*y3y4y5y6*<br>y6y7y8y10*y10y11y12°<br>y12y13y16                                                     | 1790.90 | 71.671  | 2789179 | 2 | 895.96  | 7.02  |
| P63267 ACTH_HUMAN Actin                         | 2  |                      | YPIEHGITNWDDMEK                  | 69  | 16 | 28 | 181.37 | b2b8b9°b9b11*b11b12b<br>13°b13b14y1y2°y2y3y4<br>y5y6y7°y7*y8*y8y12<br>y14y15*y15y16*y16                                               | 1960.91 | 67.185  | 2687619 | 3 | 654.31  | -1.49 |
| P63267 ACTH_HUMAN Actin                         | 3  |                      | AGFAGDDAPR                       | 19  | 10 | 17 | 127.24 | b2b3b4b8y1y2y3y4°y4y<br>5y6°y6y7°y7y8y9y10                                                                                            | 976.45  | 31.456  | 1944071 | 2 | 488.73  | -3.06 |
| P63267 ACTH_HUMAN Actin                         | 4  |                      | EITALAPSTMK                      | 316 | 11 | 25 | 159.02 | b1b2°b2b3°b3b4°b4b5°<br>b5b6b10b11y1y2y3y4y5<br>°y5y6°y6y7y8y9°y9y11                                                                  | 1161.62 | 50.929  | 1207932 | 2 | 581.31  | -2.21 |
| P63267 ACTH_HUMAN Actin                         | 5  |                      | AVFPSIVGRPR                      | 29  | 11 | 14 | 114.34 | b1b2b9y1y2y3y4y5y6y7<br>y8y9y10y11                                                                                                    | 1198.71 | 56.275  | 885373  | 2 | 599.86  | 1.63  |
| P63267 ACTH_HUMAN Actin                         | 6  |                      | DSYVGDEAQSQR                     | 51  | 12 | 43 | 242.25 | b1°b1b2°b2b3°b3b4°b4<br>b5b6b7°b7b8b9b10b11y<br>1y2y3°y3y4°y4*y4y5°y5<br>*y5y6°y6*y6y7°y7*y7y<br>8°y8*y8y9°y9*y9y10°y1<br>0y11y12*y12 | 1354.62 | 24.266  | 700316  | 2 | 677.81  | -5.59 |
| P63267 ACTH_HUMAN Actin                         | 7  |                      | HQGVVMVGMGQK                     | 40  | 11 | 26 | 188.64 | b1b2°b2b3b4°b4b5b6b<br>8°b8b9b10y1y2°y2y3*y<br>3y4*y4y5y6y7y9y10*y1<br>0y11                                                           | 1171.57 | 33.564  | 386900  | 2 | 586.29  | 0.21  |
| P63267 ACTH_HUMAN Actin                         | 8  |                      | IIAPPERK                         | 329 | 8  | 11 | 76.24  | b2b3y2y3y4°y4y5y6°y6<br>y7y8                                                                                                          | 923.56  | 26.997  | 133691  | 2 | 462.28  | -8.33 |
| P63267 ACTH_HUMAN Actin                         | 9  |                      | DSYVGDEAQSQK                     | 51  | 11 | 4  | 37.02  | b5b9b10y9                                                                                                                             | 1198.52 | 26.159  | 22055   | 1 | 1198.52 | 1.73  |
| P63267 ACTH_HUMAN Actin                         | 10 | Carbamidomethyl+C(1) | CPETLFQPSFIGMESAGIHETTYNS<br>IMK | 257 | 28 | 4  | 15.07  | b8b10y7y9                                                                                                                             | 3188.47 | 107.920 | 3058    | 4 | 797.87  | -1.76 |
| P10720 PF4V_HUMAN Platelet factor 4<br>variant  | 1  |                      | HITSLEVIK                        | 56  | 9  | 16 | 134.63 | b1b2b3b4°b4b5°b5b6b7<br>y2y3y4y6y7y8y9                                                                                                | 1039.61 | 48.514  | 375971  | 2 | 520.31  | -3.52 |
| P10720 PF4V_HUMAN Platelet factor 4<br>variant  | 2  | Carbamidomethyl+C(5) | AGPHCPTAQLIATLK                  | 65  | 15 | 15 | 153.12 | b4b5b7°b7b8b9b10y3y4<br>y5y6y7y8y11y15                                                                                                | 1577.84 | 61.301  | 344982  | 3 | 526.62  | -6.58 |
| P10720 PF4V_HUMAN Platelet factor 4<br>variant  | 3  |                      | SSAAR                            | 1   | 5  | 2  | 13.3   | y4°y4                                                                                                                                 | 491.26  | 28.212  | 19108   | 1 | 491.26  | 7.89  |
| P63104 I433Z_HUMAN 14-3-3 protein<br>zeta/delta | 1  | Carbamidomethyl+C(3) | DICNDVLSLEK                      | 91  | 12 | 6  | 50.06  | b3y3y5y6y10y12                                                                                                                        | 1418.72 | 99.236  | 129480  | 2 | 709.86  | 0.43  |
| P63104 I433Z_HUMAN 14-3-3 protein<br>zeta/delta | 2  |                      | FLIPNASQAESK                     | 103 | 12 | 19 | 124.06 | b2b3b6°b6y2y3°y3y4°y<br>4y5°y5y6y7y9*y9y10*y<br>10y11y12                                                                              | 1304.69 | 55.716  | 113122  | 2 | 652.85  | 2.99  |
| P63104 I433Z_HUMAN 14-3-3 protein<br>zeta/delta | 3  |                      | SVTEQGAELSNEER                   | 27  | 14 | 19 | 142.43 | b5°b5b8b12b13y2y4y5y<br>7y8y9°y9y10*y10y11y1<br>2°y12*y12y14                                                                          | 1548.72 | 35.323  | 100413  | 2 | 774.86  | 4.41  |



|                                              |    |                                          |                                   |     |    |    |        |                                                          |         |         |         |   |         |        |
|----------------------------------------------|----|------------------------------------------|-----------------------------------|-----|----|----|--------|----------------------------------------------------------|---------|---------|---------|---|---------|--------|
| P63104 1433Z_HUMAN 14-3-3 protein zeta/delta | 4  |                                          | GIVDQSQAYQEAFFEISKK               | 139 | 19 | 10 | 64.28  | b2b3b7y3y4y10y11y14y16y19                                | 2169.08 | 68.694  | 89839   | 3 | 723.70  | -0.34  |
| P63104 1433Z_HUMAN 14-3-3 protein zeta/delta | 5  |                                          | YLAEVAAGDDKK                      | 127 | 12 | 7  | 69.3   | y3y5y7°y7y8y10y12                                        | 1279.64 | 33.363  | 55321   | 3 | 427.22  | -9.44  |
| P63104 1433Z_HUMAN 14-3-3 protein zeta/delta | 6  |                                          | DSTLMQLLR                         | 212 | 10 | 3  | 41.9   | y3y5y7                                                   | 1189.67 | 93.010  | 18251   | 2 | 595.34  | 8.41   |
| P63104 1433Z_HUMAN 14-3-3 protein zeta/delta | 7  |                                          | GIVDQSQAYQEAFFEISK                | 139 | 18 | 6  | 29.39  | b9b11y9°y9y10*y10                                        | 2041.02 | 81.520  | 7601    | 3 | 681.01  | 14.71  |
| P63104 1433Z_HUMAN 14-3-3 protein zeta/delta | 8  |                                          | TAFDEAIAELDTLSEESYK               | 193 | 19 | 8  | 40.75  | b4b5b10°b10y3y14y16°y16                                  | 2132.03 | 81.667  | 26208   | 3 | 711.35  | 16.03  |
| P63104 1433Z_HUMAN 14-3-3 protein zeta/delta | 9  |                                          | SVTEQGAELSNEERNLLSVAYK            | 27  | 22 | 3  | 20.08  | b7b10b12                                                 | 2437.24 | 106.136 | 100509  | 3 | 813.08  | 7.51   |
| P63104 1433Z_HUMAN 14-3-3 protein zeta/delta | 10 |                                          | TAFDEAIAELDTLSEESYKDISTLMQLLR     | 193 | 29 | 6  | 24.47  | b6b8b12b14°b14y4                                         | 3302.62 | 136.655 | 20135   | 4 | 826.41  | -5.99  |
| P63104 1433Z_HUMAN 14-3-3 protein zeta/delta | 11 |                                          | GIVDQSQAYQEAFFEISKK               | 139 | 19 | 6  | 24.26  | b7*b7b12b13°b13*b13                                      | 2169.11 | 54.415  | 15767   | 4 | 543.03  | 11.37  |
| P63104 1433Z_HUMAN 14-3-3 protein zeta/delta | 12 |                                          | DSTLMQLLRDNLTLWTSDTQGD EAEAGEGGEN | 212 | 33 | 4  | 11.09  | b4b6°b6y6                                                | 3579.64 | 114.278 | 5168    | 4 | 895.67  | 1.16   |
| P63104 1433Z_HUMAN 14-3-3 protein zeta/delta | 13 |                                          | GDYYRYLAEVAAGDDK                  | 122 | 16 | 5  | 54.65  | y6y7y8y9y11                                              | 1805.86 | 79.891  | 4280    | 2 | 903.43  | 11.63  |
| P63104 1433Z_HUMAN 14-3-3 protein zeta/delta | 14 | Carbamidomethyl+C(9); Phosphoryl STY(14) | IETELRDICNDVLSLEK                 | 85  | 18 | 6  | 34.98  | b13°b13y5y7y8y11                                         | 2240.08 | 94.285  | 4701    | 3 | 747.37  | 1.85   |
| P63104 1433Z_HUMAN 14-3-3 protein zeta/delta | 15 | Oxidation+M(25)                          | TAFDEAIAELDTLSEESYKDISTLMQLLR     | 193 | 29 | 3  | 17.56  | b3b7b13                                                  | 3318.66 | 112.853 | 2706    | 3 | 1106.89 | 9.34   |
| P63104 1433Z_HUMAN 14-3-3 protein zeta/delta | 16 |                                          | IVDQSQAYQEAFFEISK                 | 140 | 17 | 2  | 13.57  | b3b5                                                     | 1983.94 | 81.495  | 32071   | 3 | 661.99  | -10.64 |
| P02042 HBD_HUMAN Hemoglobin subunit delta    | 1  |                                          | LLVVYPWTQR                        | 31  | 10 | 21 | 130.25 | b2b3b4b5y1y2*y2y3°y3*y3y4y5°y5*y5y6*y6y7*y7y8y9y10       | 1274.72 | 79.093  | 1756497 | 2 | 637.87  | -1.92  |
| P02042 HBD_HUMAN Hemoglobin subunit delta    | 2  |                                          | VLGAFSDGLAHLNLIK                  | 67  | 16 | 22 | 153.6  | b1b2b3y1y2y3*y3y4*y4y5°y5y6*y6y7y9y10y11y12°y12y13y14y16 | 1669.87 | 76.998  | 840185  | 3 | 557.29  | -14.55 |
| P02042 HBD_HUMAN Hemoglobin subunit delta    | 3  |                                          | VVAGVANALAHK                      | 133 | 12 | 16 | 124.06 | b2b5b8y2y3y4y5y6*y6y7*y7y8y9*y9y10y12                    | 1149.67 | 42.624  | 399304  | 2 | 575.34  | -4.57  |
| P02042 HBD_HUMAN Hemoglobin subunit delta    | 4  | Carbamidomethyl+C(11)                    | GTFSQSELHCDK                      | 83  | 13 | 12 | 59.78  | b10b12b13°b13*b13y1y2y4y5y11y12y13                       | 1521.71 | 65.985  | 191620  | 2 | 761.36  | 6.82   |
| P02042 HBD_HUMAN Hemoglobin subunit delta    | 5  |                                          | VHLTPEEK                          | 1   | 8  | 5  | 36.33  | b2b3y4y6y8                                               | 952.50  | 26.639  | 141814  | 2 | 476.76  | -6.22  |
| P02042 HBD_HUMAN Hemoglobin subunit delta    | 6  |                                          | LHVDPENFR                         | 96  | 9  | 14 | 103.25 | b2b3b4y2y3*y3y4°y4y5y6y7y8*y8y9                          | 1126.56 | 47.573  | 117292  | 2 | 563.78  | -2.17  |
| P02042 HBD_HUMAN Hemoglobin subunit delta    | 7  |                                          | TAVNALWGK                         | 9   | 9  | 4  | 30.71  | b4*b4b8y5                                                | 959.51  | 26.947  | 70074   | 2 | 480.26  | -18.51 |
| P02042 HBD_HUMAN Hemoglobin subunit delta    | 8  |                                          | VNVDVAVGGEALGR                    | 18  | 13 | 3  | 20.83  | b5y7y11                                                  | 1256.66 | 50.457  | 29290   | 2 | 628.83  | 0.39   |
| P02042 HBD_HUMAN Hemoglobin subunit delta    | 9  |                                          | EFTPMQAAAYQK                      | 121 | 12 | 4  | 22.48  | b4°b4b9y9                                                | 1441.68 | 47.893  | 25114   | 2 | 721.35  | 3.64   |
| P02042 HBD_HUMAN Hemoglobin subunit delta    | 10 |                                          | FFESFGDLSPPDAVMGNPK               | 41  | 19 | 7  | 49.05  | b11b12y10y12y15*y15y18                                   | 2044.96 | 81.672  | 21774   | 2 | 1022.98 | 14.68  |
| P02042 HBD_HUMAN Hemoglobin subunit delta    | 11 |                                          | VVAGVANALAHKYH                    | 133 | 14 | 12 | 130.67 | b3b4b12y3y4y5y6y7y9*y9y11y12                             | 1449.80 | 46.168  | 58223   | 2 | 725.40  | 1.94   |
| P02042 HBD_HUMAN Hemoglobin subunit delta    | 12 |                                          | TAVNALWGKVNVDVAVGGEALGR           | 9   | 22 | 3  | 22.31  | b10b11y9                                                 | 2197.17 | 110.391 | 2300    | 2 | 1099.09 | -1.56  |
| P02042 HBD_HUMAN Hemoglobin subunit delta    | 13 | Oxidation+M(15)                          | FFESFGDLSPPDAVMGNPK               | 41  | 19 | 3  | 15.08  | b6b8y16                                                  | 2060.93 | 80.681  | 4808    | 4 | 515.99  | 2.84   |

|                                              |    |                                             |                              |     |    |    |        |                                                                                                      |         |         |         |   |         |        |
|----------------------------------------------|----|---------------------------------------------|------------------------------|-----|----|----|--------|------------------------------------------------------------------------------------------------------|---------|---------|---------|---|---------|--------|
| P02042 HBD_HUMAN Hemoglobin subunit delta    | 14 |                                             | LHVDPENFR                    | 96  | 9  | 0  | 1.59   |                                                                                                      | 1109.52 | 47.562  | 5973    | 3 | 370.51  | -12.54 |
| P08567 PLEK_HUMAN Pleckstrin                 | 1  |                                             | EDPAYLHYYPAGAEDPLGAIHLR      | 269 | 24 | 24 | 197.56 | b2b10°b10b12b13b14b15°b15y1y2y3y4y5y6y7y8y9y10y12y14y15y18y22y24                                     | 2683.26 | 79.772  | 233649  | 4 | 671.57  | -8.10  |
| P08567 PLEK_HUMAN Pleckstrin                 | 2  |                                             | SEEEENLFEIITADEVHYFLQAATPK   | 308 | 25 | 37 | 328.23 | b2b3°b3b4°b4b5°b5b6°b6°b6b7b9°b9b10y2y3y5y6y7y8y10y11y12y13y14*y14y15y16y17y18y19y20y21*y21y22y23y25 | 2894.41 | 122.523 | 161907  | 3 | 965.47  | 0.17   |
| P08567 PLEK_HUMAN Pleckstrin                 | 3  |                                             | QEGLMIASSLLNEGYLQPADMSK      | 174 | 24 | 15 | 71.71  | b4°b4b5°b5b15°b15b16y2y3y7y9*y9y11y15y24                                                             | 2552.23 | 91.723  | 65083   | 3 | 851.42  | -2.39  |
| P08567 PLEK_HUMAN Pleckstrin                 | 4  | Carbamidomethyl+C(5); Carbamidomethyl+C(10) | IFNHCFGTGNCVIDWLVSNQSVR      | 150 | 22 | 3  | 13.56  | b7b11y7                                                                                              | 2666.28 | 93.431  | 50763   | 3 | 889.43  | 8.70   |
| P08567 PLEK_HUMAN Pleckstrin                 | 5  | Carbamidomethyl+C(8)                        | GSTLTSPCQDFGKR               | 51  | 14 | 7  | 60.84  | b11y3y4y8y9y10y14                                                                                    | 1553.74 | 41.848  | 23247   | 2 | 777.37  | 2.91   |
| P08567 PLEK_HUMAN Pleckstrin                 | 6  |                                             | LPETIDL GALYLSMK             | 119 | 15 | 4  | 18.32  | b12y4y8y15                                                                                           | 1663.90 | 95.719  | 20064   | 2 | 832.45  | 2.86   |
| P08567 PLEK_HUMAN Pleckstrin                 | 7  | Carbamidomethyl+C(2)                        | GCVVTSVESNSNGRK              | 293 | 15 | 10 | 52.04  | b2b3y8°y8*y8y9y10*y10y11y15                                                                          | 1593.75 | 30.007  | 15032   | 3 | 531.92  | -9.88  |
| P08567 PLEK_HUMAN Pleckstrin                 | 8  | Carbamidomethyl+C(8)                        | GSTLTSPCQDFGK                | 51  | 13 | 7  | 32.59  | b2°b2b10°b10y4y5y10                                                                                  | 1397.66 | 42.422  | 2920    | 3 | 466.56  | 13.36  |
| P08567 PLEK_HUMAN Pleckstrin                 | 9  |                                             | AIQMASR                      | 340 | 7  | 4  | 37.7   | b3b4*b4y6                                                                                            | 776.43  | 43.766  | 347136  | 1 | 776.43  | 21.85  |
| P08567 PLEK_HUMAN Pleckstrin                 | 10 |                                             | QQDHFFQA AFLEER              | 75  | 14 | 10 | 66.49  | b5b8b10y4°y4y6y7y8°y8*y8                                                                             | 1765.84 | 72.813  | 36925   | 3 | 589.28  | 4.49   |
| P08567 PLEK_HUMAN Pleckstrin                 | 11 |                                             | MFVFK                        | 65  | 5  | 1  | 13.3   | b4                                                                                                   | 671.35  | 35.951  | 19284   | 2 | 336.18  | -5.82  |
| P08567 PLEK_HUMAN Pleckstrin                 | 12 |                                             | EGYLVK                       | 7   | 6  | 1  | 13.7   | b4                                                                                                   | 708.39  | 99.364  | 4016    | 1 | 708.39  | -7.50  |
| P08567 PLEK_HUMAN Pleckstrin                 | 13 |                                             | NRQEGLMIASSLLNEGYLQPADMSK    | 172 | 26 | 6  | 39.28  | b7b15*b15y11y12y13                                                                                   | 2822.39 | 86.615  | 42450   | 3 | 941.47  | 3.89   |
| P08567 PLEK_HUMAN Pleckstrin                 | 14 | Carbamidomethyl+C(14)                       | GMIPLKGSTLTSPCQDFGK          | 45  | 19 | 5  | 40.2   | b3y3y4y5y13                                                                                          | 2037.00 | 104.014 | 18885   | 2 | 1019.01 | -5.03  |
| P08567 PLEK_HUMAN Pleckstrin                 | 15 |                                             | SEEEENLFEIITADEVHYFLQAATPKER | 308 | 27 | 3  | 11.99  | b3b6y19                                                                                              | 3179.51 | 94.437  | 3683    | 3 | 1060.51 | -15.05 |
| P08567 PLEK_HUMAN Pleckstrin                 | 16 | Oxidation+M(5)                              | QEGLMIASSLLNEGYLQPADMSK      | 174 | 24 | 12 | 61.74  | b4°b4b16y3°y3y4°y4y5y6y13y17*y17                                                                     | 2568.21 | 88.769  | 14229   | 3 | 856.74  | -10.46 |
| P08567 PLEK_HUMAN Pleckstrin                 | 17 | Carbamidomethyl+C(4)                        | TSPCQDFGKR                   | 55  | 10 | 0  | 3.57   |                                                                                                      | 1195.56 | 41.797  | 1850    | 2 | 598.28  | 4.29   |
| P08567 PLEK_HUMAN Pleckstrin                 | 18 |                                             | EDPAYLHYYPAGAEDPLGAIHLR      | 269 | 24 | 0  | 7.54   |                                                                                                      | 2665.24 | 79.721  | 29340   | 4 | 667.07  | -7.60  |
| Q562R1 ACTBL_HUMAN Beta-actin-like protein 2 | 1  |                                             | SYELPDGQVITIGNER             | 239 | 16 | 25 | 199.45 | b2b3b8b9°b9b10b11°b11b12°b12y3*y3y4y5y6*y6y7y8y10*y10y11y12°y12y13y16                                | 1790.90 | 71.671  | 2789179 | 2 | 895.96  | 7.02   |
| Q562R1 ACTBL_HUMAN Beta-actin-like protein 2 | 2  |                                             | HQGVVMVGMGQK                 | 40  | 11 | 26 | 188.64 | b1b2*b2b3b4°b4b5b6b8°b8b9b10y1y2*y2y3*y3y4*y4y5y6y7y9y10*y10y11                                      | 1171.57 | 33.564  | 386900  | 2 | 586.29  | 0.21   |
| Q562R1 ACTBL_HUMAN Beta-actin-like protein 2 | 3  |                                             | LDLAGRDLTDYLMK               | 178 | 14 | 7  | 45.03  | b2y2y6y8y10y12y14                                                                                    | 1623.82 | 79.051  | 180834  | 3 | 541.94  | -12.93 |
| Q562R1 ACTBL_HUMAN Beta-actin-like protein 2 | 4  |                                             | IIAPPERK                     | 329 | 8  | 11 | 76.24  | b2b3y2y3y4°y4y5y6°y6y7y8                                                                             | 923.56  | 26.997  | 133691  | 2 | 462.28  | -8.33  |
| Q562R1 ACTBL_HUMAN Beta-actin-like protein 2 | 5  | Carbamidomethyl+C(1)                        | CDVDIRK                      | 285 | 7  | 12 | 93.92  | b1b2°b2b3b4b5y3y4°y4y5y6y7                                                                           | 905.44  | 22.935  | 126991  | 2 | 453.22  | -9.91  |

|                                               |    |                                          |                                 |      |    |    |        |                                                                                       |         |         |        |   |         |        |
|-----------------------------------------------|----|------------------------------------------|---------------------------------|------|----|----|--------|---------------------------------------------------------------------------------------|---------|---------|--------|---|---------|--------|
| [Q562R1 ACTBL_HUMAN Beta-actin-like protein 2 | 6  |                                          | TTGIVMDSGDGVTHIVPIYEGYAL PHAILR | 148  | 30 | 3  | 11.44  | b3b16y15                                                                              | 3195.63 | 86.171  | 2076   | 3 | 1065.88 | -6.80  |
| [Q562R1 ACTBL_HUMAN Beta-actin-like protein 2 | 7  |                                          | IIAPPER                         | 329  | 7  | 7  | 54.01  | y3°y3y4°y4y5°y5y6                                                                     | 795.46  | 33.626  | 87860  | 2 | 398.23  | -18.18 |
| [Q562R1 ACTBL_HUMAN Beta-actin-like protein 2 | 8  |                                          | YPIEHGVVTNWDDMEK                | 69   | 16 | 5  | 28.59  | b7b8b12°b12y13                                                                        | 1932.85 | 54.549  | 40441  | 2 | 966.93  | -17.11 |
| [Q562R1 ACTBL_HUMAN Beta-actin-like protein 2 | 9  |                                          | AVFPSMIGRPR                     | 29   | 11 | 4  | 24.51  | b4b6y7°y7                                                                             | 1230.66 | 55.702  | 13821  | 2 | 615.83  | -13.99 |
| [Q562R1 ACTBL_HUMAN Beta-actin-like protein 2 | 10 |                                          | YSVWIGGSILASLSTFQQMWISK         | 337  | 23 | 7  | 35.68  | b4b5b7°b7y5y10y20                                                                     | 2602.34 | 136.492 | 7521   | 3 | 868.12  | 0.28   |
| [Q562R1 ACTBL_HUMAN Beta-actin-like protein 2 | 11 |                                          | MTQIMFEAFNTPAMYVAIQAVLS LYASGR  | 119  | 29 | 7  | 26.23  | b3b4°b4*b4b10b17y5                                                                    | 3223.64 | 72.836  | 6503   | 4 | 806.66  | 11.74  |
| [Q562R1 ACTBL_HUMAN Beta-actin-like protein 2 | 12 |                                          | EITLAPSTMK                      | 316  | 11 | 4  | 41.79  | b9y6y7y8                                                                              | 1203.66 | 26.922  | 2820   | 2 | 602.33  | -3.35  |
| [Q562R1 ACTBL_HUMAN Beta-actin-like protein 2 | 13 | Carbamidomethyl+C(2)                     | LCYVALDFEQEMVR                  | 216  | 14 | 3  | 19.47  | b3b9y5                                                                                | 1772.82 | 106.746 | 1965   | 3 | 591.61  | -5.99  |
| [Q562R1 ACTBL_HUMAN Beta-actin-like protein 2 | 14 | Carbamidomethyl+C(17)                    | TDNELSALVVDNGSGMCK              | 1    | 18 | 7  | 43.07  | b5°b5*b5b6b7y6y12                                                                     | 1909.87 | 87.433  | 1663   | 2 | 955.44  | 4.99   |
| [Q562R1 ACTBL_HUMAN Beta-actin-like protein 2 | 15 |                                          | GVLTLKYPIEHGVVTNWDDMEK          | 63   | 22 | 4  | 22.31  | b3b4y14°y14                                                                           | 2544.27 | 69.613  | 158343 | 3 | 848.76  | -5.57  |
| [Q562R1 ACTBL_HUMAN Beta-actin-like protein 2 | 16 |                                          | DLYANTVLSGGSTMYPGIADRMQ K       | 292  | 24 | 6  | 40.48  | b9°b9b10b13b14y12                                                                     | 2588.24 | 69.613  | 22201  | 3 | 863.42  | -4.62  |
| [Q562R1 ACTBL_HUMAN Beta-actin-like protein 2 | 17 | Carbamidomethyl+C(13)                    | HQGVVMVGMGQKDCYVGDEAQS K        | 40   | 22 | 3  | 13.56  | b9b13y9                                                                               | 2424.08 | 76.390  | 19232  | 4 | 606.77  | 0.71   |
| [Q562R1 ACTBL_HUMAN Beta-actin-like protein 2 | 18 |                                          | YPIEHGVVTNWDDMEKIWHYHTFY NELR   | 69   | 27 | 7  | 32.19  | b3b5b6y8°y8y10y12                                                                     | 3455.63 | 84.503  | 9711   | 3 | 1152.55 | 3.53   |
| [Q562R1 ACTBL_HUMAN Beta-actin-like protein 2 | 19 | Phosphoryl STY()                         | YSVWIGGSILASLSTFQQMWISK         | 337  | 23 | 10 | 53.25  | b7b8_H3PO4<br>b8b9b11°b11y8y10°y10y11°y11                                             | 2682.28 | 124.372 | 9698   | 3 | 894.76  | -6.46  |
| [Q562R1 ACTBL_HUMAN Beta-actin-like protein 2 | 20 | Phosphoryl STY(7)                        | GYNFTTTAEREIVRDVK               | 197  | 17 | 3  | 16.48  | b3b6y11                                                                               | 2079.01 | 72.067  | 5310   | 2 | 1040.01 | 12.10  |
| [Q562R1 ACTBL_HUMAN Beta-actin-like protein 2 | 21 | Oxidation+M(14)                          | DLYANTVLSGGSTMYPGIADR           | 292  | 21 | 3  | 14.01  | b4y8y12                                                                               | 2217.05 | 68.627  | 17618  | 3 | 739.69  | 1.76   |
| [Q562R1 ACTBL_HUMAN Beta-actin-like protein 2 | 22 | Carbamidomethyl+C(2);<br>Oxidation+M(12) | LCYVALDFEQEMVR                  | 216  | 14 | 7  | 19.47  | b10°b10*b10y5°y5y12*<br>y12                                                           | 1788.82 | 100.186 | 6525   | 3 | 596.95  | -4.71  |
| [P35579 MYH9_HUMAN Myosin-9                   | 1  |                                          | LQQLDDLLVLDLHQQR                | 1417 | 16 | 27 | 195.77 | b2*b2b3*b3b4°b4b6*b6<br>b12b14y3*y3y4y5*y5y6<br>y7*y7y8y10y11y12y13y<br>14°y14*y14y16 | 1949.98 | 86.206  | 256407 | 3 | 650.66  | -6.89  |
| [P35579 MYH9_HUMAN Myosin-9                   | 2  |                                          | IAEFTTNLTETEEK                  | 1000 | 14 | 15 | 142.43 | b4b9b10b13b14y4y6y7y<br>8y10y11y12°y12y13y14                                          | 1653.79 | 57.644  | 204096 | 2 | 827.40  | 4.21   |
| [P35579 MYH9_HUMAN Myosin-9                   | 3  |                                          | DFSALESQLQDTQELLQEENR           | 1301 | 21 | 20 | 104.54 | b2b3°b3b4°b4b5b6b16y<br>1y3°y3y4°y4y5°y5*y5y6<br>y8y12y21                             | 2493.20 | 92.093  | 201560 | 2 | 1247.10 | 10.18  |
| [P35579 MYH9_HUMAN Myosin-9                   | 4  |                                          | IAQLEEQLDNETK                   | 1815 | 13 | 10 | 84.04  | b3b4b11y5y6°y6y9y10y<br>11y13                                                         | 1530.77 | 51.960  | 184516 | 2 | 765.89  | 2.55   |
| [P35579 MYH9_HUMAN Myosin-9                   | 5  |                                          | QLLQANPILEAFGNAK                | 209  | 16 | 27 | 172.05 | b2*b2b3*b3b4*b4b6*b<br>6b16y2y4*y4y5y6y7°y7<br>*y7y8y9y10y11y12*y12<br>y13*y13y14y16  | 1726.95 | 91.678  | 177915 | 2 | 863.98  | 1.70   |
| [P35579 MYH9_HUMAN Myosin-9                   | 6  |                                          | IIGLDQVAGMSETALPGAFK            | 617  | 20 | 13 | 79.07  | b2b3b15y2y3y5y6y7y8y<br>12y13°y13y20                                                  | 2018.07 | 90.338  | 164007 | 2 | 1009.54 | 5.38   |
| [P35579 MYH9_HUMAN Myosin-9                   | 7  |                                          | IMGPIEEQMGLLR                   | 327  | 14 | 8  | 39.39  | b2b3b4b10y10y12°y12y<br>14                                                            | 1615.83 | 78.356  | 160852 | 2 | 808.42  | 4.53   |

|                            |    |                       |                      |      |    |    |        |                                                              |         |        |        |   |         |        |
|----------------------------|----|-----------------------|----------------------|------|----|----|--------|--------------------------------------------------------------|---------|--------|--------|---|---------|--------|
| P35579 MYH9_HUMAN Myosin-9 | 8  |                       | DELADEIANSSGK        | 1703 | 13 | 11 | 66.76  | b2b3b4b12y1y2y7y9y11y12y13                                   | 1348.63 | 50.092 | 147257 | 2 | 674.82  | 2.35   |
| P35579 MYH9_HUMAN Myosin-9 | 9  |                       | LTEMETLQSQLMAEK      | 867  | 15 | 20 | 128.06 | b3b4°b4b14°b14y3y4y7y9°y9y11°y11y12°y12y13*y13y14°y14*y14y15 | 1751.87 | 73.860 | 139039 | 2 | 876.44  | 5.71   |
| P35579 MYH9_HUMAN Myosin-9 | 10 |                       | IAQLEEELEEEQGNTLINDR | 1730 | 21 | 22 | 132.53 | b3b6°b6b7°b7b15b16b21y2y3°y3*y3y4y5y6y7y8y10°y10*y10y11y21   | 2472.19 | 71.207 | 134958 | 3 | 824.73  | 6.42   |
| P35579 MYH9_HUMAN Myosin-9 | 11 |                       | LDPHLVLDQLR          | 682  | 11 | 8  | 82.21  | y3y4*y4y5y6y7y9y11                                           | 1318.74 | 71.589 | 132571 | 2 | 659.88  | -2.41  |
| P35579 MYH9_HUMAN Myosin-9 | 12 |                       | VISGVLQLGNIVFKK      | 341  | 15 | 10 | 72.33  | b2b5y2y3y4y7y8y10y13y15                                      | 1614.97 | 86.162 | 126715 | 3 | 539.00  | -13.15 |
| P35579 MYH9_HUMAN Myosin-9 | 13 |                       | ANLQIDQINTDLNLER     | 1754 | 16 | 17 | 97.37  | b2b3b4*b4b11b15y2y4*y4y6y8y11y12*y12y13*y13y16               | 1869.98 | 72.632 | 119797 | 2 | 935.49  | 6.66   |
| P35579 MYH9_HUMAN Myosin-9 | 14 |                       | LQVELDNVTGLLSQSDSK   | 1277 | 18 | 11 | 77.23  | b2*b2b4y4y6y7y13y14y15y16y18                                 | 1946.02 | 81.492 | 117248 | 2 | 973.52  | 8.15   |
| P35579 MYH9_HUMAN Myosin-9 | 15 |                       | LEVNLQAMK            | 1557 | 9  | 8  | 68.11  | b2y3y4y6y7y8°y8y9                                            | 1045.57 | 58.467 | 116774 | 2 | 523.29  | -0.70  |
| P35579 MYH9_HUMAN Myosin-9 | 16 |                       | LQEMEGTVK            | 1793 | 9  | 6  | 38.49  | y2y4y6y7°y7y9                                                | 1034.52 | 33.005 | 114619 | 2 | 517.76  | 0.71   |
| P35579 MYH9_HUMAN Myosin-9 | 17 |                       | ASITALEAK            | 1806 | 9  | 7  | 38.49  | b2°b2y2y5y6y8y9                                              | 903.51  | 42.561 | 109582 | 2 | 452.26  | -9.59  |
| P35579 MYH9_HUMAN Myosin-9 | 18 |                       | ALEQQVEEMK           | 1528 | 10 | 20 | 100.64 | b1b2b3b8°b8y1y2y3y4°y4y6°y6*y6y7°y7*y7y8*y8y9y10             | 1204.59 | 46.252 | 107546 | 2 | 602.80  | -1.42  |
| P35579 MYH9_HUMAN Myosin-9 | 19 |                       | YEILTPNSIPK          | 720  | 11 | 5  | 24.51  | b2b9y6y9y11                                                  | 1274.70 | 62.787 | 107404 | 2 | 637.85  | 2.59   |
| P35579 MYH9_HUMAN Myosin-9 | 20 |                       | TQLEEELEDELQATEDAK   | 1538 | 17 | 10 | 70.57  | b5b11y2y4y5y6y9y13y14y17                                     | 1961.93 | 79.380 | 104005 | 2 | 981.47  | 7.72   |
| P35579 MYH9_HUMAN Myosin-9 | 21 |                       | ELESQISELQEDLESER    | 1107 | 17 | 16 | 167.22 | b5°b5b8b15y3y4y5y6y7y8y9y10y11y12y14y17                      | 2033.98 | 79.983 | 103426 | 2 | 1017.49 | 13.08  |
| P35579 MYH9_HUMAN Myosin-9 | 22 | Carbamidomethyl+C(9)  | VEDMAELTCLNEASVLHNLK | 82   | 20 | 12 | 75.09  | b1b2b3b5y4y5y10y13y15y16y18y20                               | 2286.11 | 80.184 | 102247 | 3 | 762.71  | -0.75  |
| P35579 MYH9_HUMAN Myosin-9 | 23 |                       | VVFQEFR              | 711  | 7  | 10 | 64.3   | b1b6y1y2y3y4°y4y5y6y7                                        | 924.49  | 56.246 | 98148  | 2 | 462.75  | -5.15  |
| P35579 MYH9_HUMAN Myosin-9 | 24 |                       | VSHLLGINVTDFTFR      | 373  | 14 | 10 | 88.92  | b1y3y4y5°y5y6y7y9y10y14                                      | 1571.84 | 75.417 | 96910  | 3 | 524.62  | -9.71  |
| P35579 MYH9_HUMAN Myosin-9 | 25 |                       | EEILAQAK             | 1661 | 8  | 8  | 54.41  | y1y2y3*y3y4y5y6y8                                            | 901.49  | 35.338 | 94411  | 2 | 451.25  | -5.89  |
| P35579 MYH9_HUMAN Myosin-9 | 26 |                       | ELEDATETADAMNR       | 1898 | 14 | 12 | 92.68  | b12y2y3y4y8y9y10°y10y11y12y14*y14                            | 1565.68 | 43.691 | 93369  | 2 | 783.35  | 5.61   |
| P35579 MYH9_HUMAN Myosin-9 | 27 |                       | TEMEDLMSSKDDVVGK     | 1503 | 15 | 6  | 43.46  | b10b11y3y8y11y15                                             | 1684.72 | 51.671 | 87885  | 3 | 562.25  | -9.93  |
| P35579 MYH9_HUMAN Myosin-9 | 28 |                       | QLEEAEEEAQR          | 1877 | 11 | 15 | 108.81 | b11y2y3y4y5°y5y6°y6y7y8°y8y9°y9y10y11                        | 1331.61 | 30.165 | 87167  | 2 | 666.31  | -1.83  |
| P35579 MYH9_HUMAN Myosin-9 | 29 |                       | MQQNIQELEELEEEESAR   | 940  | 19 | 18 | 115.04 | b2*b2b5b7b8b11y2y3y4°y4y5°y5y7y8y9y13y18y19                  | 2333.09 | 75.541 | 83640  | 2 | 1167.05 | 12.56  |
| P35579 MYH9_HUMAN Myosin-9 | 30 | Carbamidomethyl+C(13) | LEEEQIILEDQNCK       | 975  | 14 | 12 | 129.12 | b3b6b7b9b13y3y4y5y7y8y9y14                                   | 1760.84 | 55.455 | 75733  | 2 | 880.93  | 4.09   |
| P35579 MYH9_HUMAN Myosin-9 | 31 |                       | VEAQLQELQVK          | 1249 | 11 | 10 | 82.5   | b2b3b5y3y4y7y8*y8y9y11                                       | 1284.72 | 53.684 | 73595  | 2 | 642.86  | -0.38  |
| P35579 MYH9_HUMAN Myosin-9 | 32 |                       | QIATLHAQVADMK        | 1357 | 13 | 8  | 20.83  | b4°b4*b4y1y3y5°y5y13                                         | 1425.73 | 73.599 | 73402  | 2 | 713.37  | -13.27 |
| P35579 MYH9_HUMAN Myosin-9 | 33 |                       | AGVLAHLEEER          | 764  | 11 | 6  | 53.34  | b3y4y5y6y8y11                                                | 1223.63 | 50.252 | 64258  | 2 | 612.32  | -4.69  |
| P35579 MYH9_HUMAN Myosin-9 | 34 |                       | VIQYLAYVASSHK        | 186  | 13 | 8  | 41.62  | b1y5°y5y6y9y11*y11y13                                        | 1478.78 | 61.333 | 53400  | 3 | 493.60  | -11.72 |

|                            |    |                       |                                    |      |    |    |        |                                             |         |         |        |   |         |        |
|----------------------------|----|-----------------------|------------------------------------|------|----|----|--------|---------------------------------------------|---------|---------|--------|---|---------|--------|
| P35579 MYH9_HUMAN Myosin-9 | 35 |                       | SMEAEMIQLQEELAAER                  | 1676 | 18 | 17 | 132.81 | b2b3b10y2y3y4y5y6y8y9°y9*y9y10y11*y11y12y15 | 2048.95 | 94.524  | 51538  | 3 | 683.65  | -7.15  |
| P35579 MYH9_HUMAN Myosin-9 | 36 |                       | KEEELQAALAR                        | 1080 | 11 | 11 | 99.78  | b3b6b8y2y4y5y8y9y10*y10y11                  | 1257.68 | 42.992  | 50445  | 2 | 629.34  | -3.30  |
| P35579 MYH9_HUMAN Myosin-9 | 37 | Carbamidomethyl+C(7)  | MEDSVGCLETAEVVK                    | 1372 | 15 | 5  | 29.7   | b3y10y11y13y15                              | 1696.76 | 54.227  | 49251  | 2 | 848.88  | 10.43  |
| P35579 MYH9_HUMAN Myosin-9 | 38 | Carbamidomethyl+C(7)  | MEDSVGCLETAEVVKR                   | 1372 | 16 | 6  | 42.99  | b2b11y7y8y9y11                              | 1852.84 | 49.013  | 44397  | 3 | 618.28  | -2.17  |
| P35579 MYH9_HUMAN Myosin-9 | 39 |                       | EEVGEEAIVELVENGKK                  | 47   | 17 | 7  | 42.41  | b2°b2y4y5y8y9y17                            | 1871.94 | 76.078  | 42276  | 3 | 624.65  | -11.41 |
| P35579 MYH9_HUMAN Myosin-9 | 40 | Carbamidomethyl+C(1)  | CNGVLEGIR                          | 693  | 9  | 6  | 53.55  | b8y1y3y5y7y9                                | 1017.51 | 49.223  | 41562  | 2 | 509.26  | -4.50  |
| P35579 MYH9_HUMAN Myosin-9 | 41 |                       | NLPIYSEEIVEMYK                     | 125  | 14 | 5  | 42.77  | b3y5y9y11y12                                | 1727.87 | 82.467  | 40958  | 2 | 864.44  | 6.29   |
| P35579 MYH9_HUMAN Myosin-9 | 42 |                       | DLGEELEALK                         | 1135 | 10 | 3  | 27.12  | b9y3y8                                      | 1116.58 | 72.979  | 35399  | 2 | 558.79  | 3.17   |
| P35579 MYH9_HUMAN Myosin-9 | 43 |                       | NTDQASMPDNTAAQK                    | 358  | 15 | 5  | 26.4   | y8y10y11y15*y15                             | 1591.71 | 27.134  | 32526  | 2 | 796.36  | 3.22   |
| P35579 MYH9_HUMAN Myosin-9 | 44 |                       | ADEWLMK                            | 580  | 7  | 5  | 40.71  | b1y3y4y5y7                                  | 892.42  | 56.215  | 29906  | 2 | 446.72  | 1.30   |
| P35579 MYH9_HUMAN Myosin-9 | 45 |                       | LEGDSTDLSQIAELQAIAELK              | 1052 | 23 | 15 | 82.49  | b2b4b7b9b11b14b19y1y2y3°y3y4°y4y5y23        | 2487.26 | 102.072 | 27843  | 2 | 1244.14 | 7.36   |
| P35579 MYH9_HUMAN Myosin-9 | 46 |                       | THEAQIQEMR                         | 1181 | 10 | 12 | 87.33  | b2°b2b3b4b6b8y2y4*y4y5y8y10                 | 1242.59 | 29.556  | 26480  | 2 | 621.80  | 0.20   |
| P35579 MYH9_HUMAN Myosin-9 | 47 |                       | FLSNGHVTPGQQDK                     | 301  | 15 | 4  | 34.85  | y3°y3y4y5                                   | 1640.82 | 49.829  | 20188  | 3 | 547.61  | -9.89  |
| P35579 MYH9_HUMAN Myosin-9 | 48 |                       | EMEALEDERK                         | 1592 | 11 | 6  | 56.35  | b2b6y3y4y5y6                                | 1378.62 | 34.641  | 14131  | 2 | 689.81  | 1.77   |
| P35579 MYH9_HUMAN Myosin-9 | 49 |                       | IAQLEEQLDNETKER                    | 1815 | 15 | 7  | 43.96  | y6y7y10°y10y11*y11y15                       | 1815.92 | 50.677  | 13804  | 2 | 908.46  | 4.57   |
| P35579 MYH9_HUMAN Myosin-9 | 50 |                       | HSQAVEELAEQLEQTK                   | 1193 | 16 | 4  | 28.59  | b7y5y13y14                                  | 1839.89 | 66.923  | 12563  | 3 | 613.97  | -12.41 |
| P35579 MYH9_HUMAN Myosin-9 | 51 |                       | LQRELEDATETADAMNREVSSLK            | 1895 | 23 | 7  | 24     | b12°b12b13b15y15*y15y23                     | 2606.30 | 78.333  | 11751  | 3 | 869.44  | 8.71   |
| P35579 MYH9_HUMAN Myosin-9 | 52 |                       | NAEQYKDQADK                        | 1856 | 11 | 6  | 24.51  | b4y1y2y3y5y11                               | 1309.58 | 15.917  | 7988   | 3 | 437.20  | -13.42 |
| P35579 MYH9_HUMAN Myosin-9 | 53 |                       | LQQLFNHTMFILEQEEYQR                | 475  | 19 | 5  | 22.04  | y3*y3y5°y5y7                                | 2467.24 | 102.772 | 4714   | 2 | 1234.12 | 11.97  |
| P35579 MYH9_HUMAN Myosin-9 | 54 |                       | ALEEAMEQK                          | 1483 | 9  | 4  | 46.27  | b1y4y6y8                                    | 1048.49 | 38.407  | 3327   | 2 | 524.75  | -3.03  |
| P35579 MYH9_HUMAN Myosin-9 | 55 |                       | ALELDSNLYR                         | 745  | 10 | 4  | 27.12  | b8y5°y5y8                                   | 1193.62 | 60.324  | 92054  | 2 | 597.31  | 5.11   |
| P35579 MYH9_HUMAN Myosin-9 | 56 |                       | TFHFIFYLLSGAGEHLK                  | 272  | 17 | 8  | 51.54  | b3b4°b4b9°b9b10b12y11                       | 1995.99 | 66.213  | 90779  | 3 | 666.00  | -20.61 |
| P35579 MYH9_HUMAN Myosin-9 | 57 |                       | EEVGEEAIVELVENGK                   | 47   | 16 | 6  | 17.33  | b15°b15*b15y5y12°y12                        | 1743.89 | 91.603  | 27171  | 2 | 872.45  | 13.16  |
| P35579 MYH9_HUMAN Myosin-9 | 58 | Carbamidomethyl+C(7)  | QELEEICHDLER                       | 910  | 13 | 4  | 29.95  | b8b12y6y9                                   | 1641.76 | 96.432  | 20479  | 2 | 821.39  | 5.95   |
| P35579 MYH9_HUMAN Myosin-9 | 59 |                       | LMATLR                             | 656  | 6  | 2  | 27.01  | y4y5                                        | 704.40  | 40.523  | 16872  | 2 | 352.71  | -12.30 |
| P35579 MYH9_HUMAN Myosin-9 | 60 |                       | TELEDTLDDSTAAQQLR                  | 1145 | 17 | 5  | 36.97  | y3y8y11°y11y15                              | 1919.88 | 71.401  | 14891  | 3 | 640.63  | -22.51 |
| P35579 MYH9_HUMAN Myosin-9 | 61 |                       | NFINNPLAQADWAAK                    | 14   | 15 | 9  | 63.75  | b6°b6b10b11°b11b13b14y4y6                   | 1672.83 | 92.960  | 14718  | 2 | 836.92  | -7.74  |
| P35579 MYH9_HUMAN Myosin-9 | 62 |                       | FQKPK                              | 555  | 5  | 2  | 13.3   | b3°b3                                       | 647.39  | 28.215  | 11868  | 1 | 647.39  | -1.23  |
| P35579 MYH9_HUMAN Myosin-9 | 63 |                       | DMFQETMEAMR                        | 316  | 11 | 9  | 48.11  | b3°b3b4°b4b8°b8y7y10°y10                    | 1388.56 | 18.038  | 7067   | 3 | 463.52  | -5.89  |
| P35579 MYH9_HUMAN Myosin-9 | 64 |                       | VMQEQGTHPK                         | 545  | 10 | 7  | 40.43  | b3b4°b4°b4b7y9°y9                           | 1154.54 | 55.569  | 6142   | 2 | 577.77  | -20.30 |
| P35579 MYH9_HUMAN Myosin-9 | 65 |                       | AEAEAR                             | 1466 | 6  | 1  | 13.7   | b4                                          | 646.31  | 50.536  | 4936   | 1 | 646.31  | -11.90 |
| P35579 MYH9_HUMAN Myosin-9 | 66 |                       | ELDDTR                             | 1652 | 6  | 1  | 13.7   | b3                                          | 748.35  | 57.715  | 4103   | 1 | 748.35  | -0.24  |
| P35579 MYH9_HUMAN Myosin-9 | 67 |                       | ALSLAR                             | 1477 | 6  | 1  | 13.7   | y4                                          | 630.38  | 22.924  | 4075   | 2 | 315.70  | -14.81 |
| P35579 MYH9_HUMAN Myosin-9 | 68 |                       | EQLEEEEAK                          | 1342 | 10 | 3  | 28.89  | b3b4y5                                      | 1233.53 | 92.939  | 3400   | 2 | 617.27  | -16.72 |
| P35579 MYH9_HUMAN Myosin-9 | 69 |                       | HNLEK                              | 1352 | 5  | 1  | 13.3   | y4                                          | 640.35  | 31.079  | 3029   | 2 | 320.68  | 8.39   |
| P35579 MYH9_HUMAN Myosin-9 | 70 |                       | HEMPPHIYAITDTAYR                   | 143  | 16 | 5  | 28.59  | b4y5y6y10°y10                               | 1914.89 | 88.825  | 2077   | 4 | 479.48  | -13.26 |
| P35579 MYH9_HUMAN Myosin-9 | 71 |                       | EQLEEEEAKHNLEK                     | 1342 | 15 | 11 | 84.84  | b3°b3b12y4y5°y5y7y8y12°y12y13               | 1854.87 | 35.611  | 165228 | 3 | 618.96  | -2.30  |
| P35579 MYH9_HUMAN Myosin-9 | 72 | Carbamidomethyl+C(27) | RQGASFIGILDIAGFEIFDLNSFEQLCINYTNEK | 441  | 34 | 6  | 38.32  | b33y6y8y10y11y12                            | 3922.92 | 96.313  | 104479 | 3 | 1308.31 | -2.99  |

|                            |     |                                                      |                                  |      |    |    |        |                                                           |         |         |        |   |         |        |
|----------------------------|-----|------------------------------------------------------|----------------------------------|------|----|----|--------|-----------------------------------------------------------|---------|---------|--------|---|---------|--------|
| P35579 MYH9_HUMAN Myosin-9 | 73  |                                                      | DLGEELEALKTELEDTLDSTAAQQ<br>ELR  | 1135 | 27 | 19 | 133.06 | b3b6b8°b8b21°b21b26y<br>3y4y5°y5°y5y7y8*y8y9<br>y10y11y12 | 3017.49 | 118.836 | 100648 | 3 | 1006.50 | 2.27   |
| P35579 MYH9_HUMAN Myosin-9 | 74  |                                                      | KLEGDSTDLSDQIAELQAQIAELK         | 1051 | 24 | 19 | 177.64 | b3°b3b5b7b8b9b10b12b<br>13b14°b14b15b22y3°y3<br>y4y5y6y7  | 2615.33 | 97.463  | 71540  | 3 | 872.45  | -2.99  |
| P35579 MYH9_HUMAN Myosin-9 | 75  |                                                      | ELESQISELQEDLESERASR             | 1107 | 20 | 4  | 14.51  | b3°b3y7y11                                                | 2348.14 | 82.128  | 62197  | 3 | 783.39  | 8.84   |
| P35579 MYH9_HUMAN Myosin-9 | 76  |                                                      | NMDPLNDNIATLLHQSSDKFVSEL<br>WK   | 587  | 26 | 3  | 18.38  | b10b12b18                                                 | 3015.48 | 105.326 | 58597  | 4 | 754.63  | -2.67  |
| P35579 MYH9_HUMAN Myosin-9 | 77  |                                                      | RGDLPFVVPR                       | 1922 | 10 | 8  | 84.32  | b3°b3b4b7y4y5y6y7                                         | 1155.66 | 61.074  | 55159  | 2 | 578.34  | 1.06   |
| P35579 MYH9_HUMAN Myosin-9 | 78  |                                                      | AGKLDPHLVLDQLR                   | 679  | 14 | 3  | 19.47  | b5y3y7                                                    | 1574.88 | 66.772  | 45866  | 3 | 525.63  | -11.55 |
| P35579 MYH9_HUMAN Myosin-9 | 79  | Carbamidomethyl+C(14)                                | KLEEEQIILEDQNCK                  | 974  | 15 | 6  | 48.83  | b7b8b11y6y8y9                                             | 1888.91 | 51.380  | 43133  | 3 | 630.31  | -13.38 |
| P35579 MYH9_HUMAN Myosin-9 | 80  |                                                      | DLEAHIDSANKNR                    | 1620 | 13 | 3  | 20.83  | b5b10y4                                                   | 1482.73 | 32.046  | 35065  | 3 | 494.91  | -2.88  |
| P35579 MYH9_HUMAN Myosin-9 | 81  | Carbamidomethyl+C(6)                                 | DKADFCIIHYAGK                    | 563  | 13 | 3  | 20.83  | b7y3y5                                                    | 1537.73 | 55.171  | 34450  | 3 | 513.25  | -9.21  |
| P35579 MYH9_HUMAN Myosin-9 | 82  | Carbamidomethyl+C(9)                                 | GFMDGKQACVLMIK                   | 731  | 14 | 5  | 27.25  | b8b10°b10b11*b11                                          | 1597.77 | 46.104  | 34222  | 2 | 799.39  | -11.08 |
| P35579 MYH9_HUMAN Myosin-9 | 83  |                                                      | DLEGLSQRHEEK                     | 1392 | 12 | 4  | 22.48  | b7b9y5°y5                                                 | 1440.71 | 50.462  | 32006  | 2 | 720.86  | 3.14   |
| P35579 MYH9_HUMAN Myosin-9 | 84  |                                                      | REQEVNILK                        | 1164 | 9  | 3  | 38.49  | b4b6b7                                                    | 1128.63 | 98.409  | 31289  | 2 | 564.82  | -9.63  |
| P35579 MYH9_HUMAN Myosin-9 | 85  |                                                      | MQQNIQELEEQLLEESARQK             | 940  | 21 | 11 | 48.33  | b5°b5b6b11y7*y7y9*y9<br>y11*y11y14                        | 2589.23 | 121.810 | 30381  | 3 | 863.75  | 9.15   |
| P35579 MYH9_HUMAN Myosin-9 | 86  |                                                      | QLEEAEEEAQRANASR                 | 1877 | 16 | 4  | 28.59  | b3b4b15y12                                                | 1830.87 | 105.432 | 30295  | 2 | 915.94  | 8.80   |
| P35579 MYH9_HUMAN Myosin-9 | 87  |                                                      | LVWVPSDKSGFEPASLK                | 30   | 17 | 3  | 23.47  | b15b16y15                                                 | 1859.97 | 80.459  | 26694  | 2 | 930.49  | -9.58  |
| P35579 MYH9_HUMAN Myosin-9 | 88  |                                                      | YLVDKFNFINPLAQADWAAK             | 8    | 21 | 6  | 30.06  | b3b4b6y7y12*y12                                           | 2454.21 | 106.131 | 16726  | 3 | 818.74  | -13.63 |
| P35579 MYH9_HUMAN Myosin-9 | 89  |                                                      | KVIQYLAYVASSHK                   | 185  | 14 | 3  | 28.04  | y3y7y10                                                   | 1606.87 | 57.081  | 16425  | 3 | 536.30  | -13.45 |
| P35579 MYH9_HUMAN Myosin-9 | 90  |                                                      | IAQLEEELEEEQGNTELINDRLK          | 1730 | 23 | 5  | 43.28  | b7b9b10b11b15                                             | 2713.36 | 107.974 | 15548  | 4 | 679.09  | 0.99   |
| P35579 MYH9_HUMAN Myosin-9 | 91  |                                                      | KANLQIDQINTDLNLER                | 1753 | 17 | 7  | 34.34  | b3°b3b8y5y6y8*y8                                          | 1998.06 | 66.183  | 15524  | 2 | 999.53  | 0.31   |
| P35579 MYH9_HUMAN Myosin-9 | 92  |                                                      | DDVGKSVHELEK                     | 1513 | 12 | 5  | 22.48  | b7°b7b9°b9y4                                              | 1355.68 | 74.001  | 15484  | 3 | 452.56  | -0.36  |
| P35579 MYH9_HUMAN Myosin-9 | 93  |                                                      | YEILTPNSIPKGFMDGK                | 720  | 17 | 3  | 16.48  | b8y8y14                                                   | 1909.97 | 97.773  | 12436  | 2 | 955.49  | -3.45  |
| P35579 MYH9_HUMAN Myosin-9 | 94  |                                                      | QLAAENRLTEMETLQSQLMAEK           | 860  | 22 | 4  | 13.56  | b13y12°y12y15                                             | 2534.24 | 108.698 | 11958  | 3 | 845.42  | -5.59  |
| P35579 MYH9_HUMAN Myosin-9 | 95  |                                                      | VEEEAAQKNMALK                    | 1091 | 13 | 6  | 62.79  | b5b7b9b11y5y12                                            | 1460.75 | 110.414 | 9534   | 2 | 730.88  | 2.67   |
| P35579 MYH9_HUMAN Myosin-9 | 96  | Carbamidomethyl+C(7)                                 | EDQSILCTGESGAGKTENTK             | 165  | 20 | 4  | 22.64  | b3y10*y10y11                                              | 2124.96 | 39.370  | 8286   | 3 | 708.99  | -3.22  |
| P35579 MYH9_HUMAN Myosin-9 | 97  |                                                      | QAQQRDELADAIANSNGK               | 1697 | 19 | 4  | 15.08  | b3b14y9°y9                                                | 2088.98 | 77.754  | 7796   | 3 | 697.00  | -1.52  |
| P35579 MYH9_HUMAN Myosin-9 | 98  | Carbamidomethyl+C(11)<br>;Carbamidomethyl+C(12)<br>) | ITDVIIGFQACCRGYLAR               | 778  | 18 | 5  | 34.98  | b4y8y9y11y14                                              | 2113.06 | 77.523  | 7265   | 3 | 705.03  | -3.47  |
| P35579 MYH9_HUMAN Myosin-9 | 99  |                                                      | TQLEEELEDELQATEDAKLR             | 1538 | 19 | 8  | 39.73  | b3b7°b7°b7b8°b8y13y1<br>4                                 | 2231.12 | 110.470 | 6108   | 3 | 744.38  | 9.41   |
| P35579 MYH9_HUMAN Myosin-9 | 100 |                                                      | RALEQQVEEMK                      | 1527 | 11 | 6  | 48.11  | b6b9b10°b10y3y10                                          | 1360.69 | 62.851  | 5679   | 1 | 1360.69 | 3.86   |
| P35579 MYH9_HUMAN Myosin-9 | 101 |                                                      | VDYKADEWLMK                      | 576  | 11 | 4  | 24.51  | b4°b4y3y6                                                 | 1397.66 | 81.591  | 4642   | 2 | 699.33  | -11.18 |
| P35579 MYH9_HUMAN Myosin-9 | 102 |                                                      | KMQQNIQELEEQLLEESAR              | 939  | 20 | 3  | 14.51  | b13y12y14                                                 | 2461.17 | 69.682  | 4575   | 3 | 821.06  | 9.42   |
| P35579 MYH9_HUMAN Myosin-9 | 103 |                                                      | FLSNHVTIPGQDKDMFQETME<br>AMR     | 301  | 26 | 8  | 70.19  | b16y3y4y5y6y7y9y13                                        | 3010.43 | 77.382  | 4479   | 2 | 1505.72 | 14.19  |
| P35579 MYH9_HUMAN Myosin-9 | 104 |                                                      | ALEQQVEEMKTQLEEELEDELQAT<br>EDAK | 1528 | 27 | 5  | 27.31  | y7y11°y11y12y15                                           | 3147.46 | 92.970  | 4189   | 3 | 1049.82 | -9.85  |
| P35579 MYH9_HUMAN Myosin-9 | 105 |                                                      | RQLEEAEEEAQR                     | 1876 | 12 | 3  | 35.7   | b4b5b6                                                    | 1487.69 | 28.999  | 3723   | 3 | 496.57  | -14.20 |
| P35579 MYH9_HUMAN Myosin-9 | 106 |                                                      | TLEEEAKTHEAQIQEMR                | 1174 | 17 | 3  | 16.48  | b10y6y13                                                  | 2042.99 | 79.269  | 3651   | 3 | 681.67  | 2.27   |
| P35579 MYH9_HUMAN Myosin-9 | 107 |                                                      | QKHSQAVEELAEQLEQTK               | 1191 | 18 | 5  | 26.82  | b12b13°b13b17y12                                          | 2096.03 | 84.457  | 3581   | 3 | 699.35  | -13.86 |
| P35579 MYH9_HUMAN Myosin-9 | 108 |                                                      | HEAMITDLEERLR                    | 1024 | 13 | 4  | 34.35  | b5b7b10y8                                                 | 1612.80 | 109.540 | 3325   | 2 | 806.90  | -6.28  |
| P35579 MYH9_HUMAN Myosin-9 | 109 |                                                      | IAQLEEQLDNETKER                  | 1815 | 15 | 3  | 18.32  | b13y9y12                                                  | 1815.89 | 76.948  | 3071   | 2 | 908.45  | -12.30 |
| P35579 MYH9_HUMAN Myosin-9 | 110 |                                                      | ELEDATETADAMNREVSSLK             | 1898 | 20 | 3  | 14.51  | b6y9y11                                                   | 2209.05 | 69.674  | 2852   | 4 | 553.02  | 8.18   |
| P35579 MYH9_HUMAN Myosin-9 | 111 |                                                      | NLPIYSEEIVEMYKGGK                | 125  | 16 | 5  | 24.52  | b12°b12b14y6y10                                           | 1912.95 | 97.336  | 2499   | 2 | 956.98  | -10.08 |

|                                    |     |                                            |                                  |      |    |    |        |                                                                               |         |         |        |   |         |        |
|------------------------------------|-----|--------------------------------------------|----------------------------------|------|----|----|--------|-------------------------------------------------------------------------------|---------|---------|--------|---|---------|--------|
| P35579 MYH9_HUMAN Myosin-9         | 112 | Carbamidomethyl+C(3)                       | QACVLMIKALELDSNLYR               | 737  | 18 | 5  | 26.82  | b13y6y8y9y9                                                                   | 2137.12 | 79.236  | 2489   | 2 | 1069.07 | 3.88   |
| P35579 MYH9_HUMAN Myosin-9         | 113 |                                            | EEVGEEAIVELVENGKK                | 47   | 17 | 12 | 84.54  | b3b8*b8b9*b9b11b12b13b15*b15y5y14                                             | 1871.94 | 90.056  | 2329   | 3 | 624.65  | -11.28 |
| P35579 MYH9_HUMAN Myosin-9         | 114 |                                            | DFSALESQLQDTQELLQEENRQK          | 1301 | 23 | 3  | 13.16  | b8y5y7                                                                        | 2749.31 | 84.508  | 1938   | 2 | 1375.16 | -5.24  |
| P35579 MYH9_HUMAN Myosin-9         | 115 | Phosphoryl STY(8)                          | INFDVNGYIVGANIETYLEK             | 240  | 21 | 3  | 14.01  | b6b16y15                                                                      | 2465.21 | 92.918  | 193988 | 3 | 822.41  | 7.92   |
| P35579 MYH9_HUMAN Myosin-9         | 116 | Phosphoryl STY(9)                          | ALELDSNLYR                       | 745  | 10 | 4  | 34.11  | b5b7*b7b8                                                                     | 1273.57 | 32.036  | 163526 | 3 | 425.20  | -1.63  |
| P35579 MYH9_HUMAN Myosin-9         | 117 | Carbamidomethyl+C(14)<br>:Phosphoryl STY() | YYSGLIYTYSGLCVVPINPYK            | 104  | 21 | 4  | 21.91  | b9y12_H3PO4<br>y12y18y20                                                      | 2600.19 | 102.918 | 4789   | 2 | 1300.60 | -5.45  |
| P35579 MYH9_HUMAN Myosin-9         | 118 | Oxidation+M(15)                            | LQRELEDATETADAMNR                | 1895 | 17 | 4  | 16.48  | b7b11y12y12                                                                   | 1978.92 | 57.226  | 7740   | 2 | 989.96  | 4.38   |
| P35579 MYH9_HUMAN Myosin-9         | 119 | Oxidation+M()                              | QQQLTAMK                         | 802  | 8  | 3  | 36.33  | b5b7y4                                                                        | 963.48  | 53.692  | 3463   | 2 | 482.24  | -13.05 |
| P35579 MYH9_HUMAN Myosin-9         | 120 | Oxidation+M(15)                            | LQRELEDATETADAMNREVSSLK          | 1895 | 23 | 3  | 13.16  | b8b11y11                                                                      | 2622.26 | 129.170 | 2373   | 3 | 874.76  | -1.49  |
| P35579 MYH9_HUMAN Myosin-9         | 121 | Oxidation+M(5)                             | QVREMEAELEDER                    | 1589 | 13 | 4  | 34.35  | b12y4y8y12                                                                    | 1649.74 | 81.575  | 1524   | 3 | 550.59  | -1.55  |
| P35579 MYH9_HUMAN Myosin-9         | 122 |                                            | LEEEQIILEDQN                     | 975  | 12 | 0  | 3.57   |                                                                               | 1472.73 | 55.540  | 30517  | 2 | 736.87  | 10.69  |
| P35579 MYH9_HUMAN Myosin-9         | 123 |                                            | SGVLQLGNIVFKK                    | 343  | 13 | 0  | 3.97   |                                                                               | 1402.85 | 86.160  | 16031  | 2 | 701.93  | 4.52   |
| P35579 MYH9_HUMAN Myosin-9         | 124 |                                            | DATETADAMNREVSSLK                | 1901 | 17 | 1  | 7.89   | b16                                                                           | 1837.84 | 78.306  | 15387  | 2 | 919.42  | -11.82 |
| P35579 MYH9_HUMAN Myosin-9         | 125 |                                            | PHLVLDQLR                        | 684  | 9  | 1  | 7.9    | b3                                                                            | 1090.64 | 71.602  | 12005  | 2 | 545.82  | 3.47   |
| P35579 MYH9_HUMAN Myosin-9         | 126 |                                            | QYLAYVASSHK                      | 188  | 11 | 3  | 16.56  | b3*b3b7                                                                       | 1266.66 | 61.323  | 8460   | 2 | 633.83  | 10.50  |
| P35579 MYH9_HUMAN Myosin-9         | 127 | Carbamidomethyl+C(7)                       | MEDSVGCLETAEEV                   | 1372 | 14 | 0  | 4.36   |                                                                               | 1568.65 | 49.024  | 8301   | 2 | 784.83  | 3.03   |
| P35579 MYH9_HUMAN Myosin-9         | 128 | Carbamidomethyl+C(5)                       | DSVGCLETAEEVK                    | 1374 | 13 | 0  | 3.97   |                                                                               | 1436.66 | 54.205  | 6291   | 2 | 718.84  | 5.10   |
| P35579 MYH9_HUMAN Myosin-9         | 129 |                                            | EEILAQAK                         | 1661 | 8  | 0  | 1.19   |                                                                               | 883.48  | 35.356  | 12101  | 2 | 442.24  | -2.76  |
| P35579 MYH9_HUMAN Myosin-9         | 130 |                                            | EMEALEDERK                       | 1592 | 11 | 0  | 2.38   |                                                                               | 1360.59 | 34.648  | 10672  | 3 | 454.20  | -4.40  |
| P35579 MYH9_HUMAN Myosin-9         | 131 |                                            | EEVGEEAIVELVENGKK                | 47   | 17 | 0  | 4.76   |                                                                               | 1853.94 | 76.068  | 7523   | 3 | 618.65  | -3.82  |
| P35579 MYH9_HUMAN Myosin-9         | 132 |                                            | THEAQIEMR                        | 1181 | 10 | 0  | 1.98   |                                                                               | 1225.55 | 29.576  | 1777   | 3 | 409.19  | -6.67  |
| P23528 COF1_HUMAN Cofilin-1        | 1   |                                            | NIILEEGKEILVGDVGQTVDDPYA<br>TFVK | 45   | 28 | 8  | 53.28  | b3b12y4y9y10y11y12y28                                                         | 3062.61 | 93.184  | 183478 | 3 | 1021.54 | 3.83   |
| P23528 COF1_HUMAN Cofilin-1        | 2   | Carbamidomethyl+C(5)                       | AVLFLCSEDKK                      | 34   | 11 | 13 | 101.03 | b1b2b3y2y3y4y5y6y7y8y9y11                                                     | 1309.67 | 58.020  | 182445 | 3 | 437.23  | -12.30 |
| P23528 COF1_HUMAN Cofilin-1        | 3   |                                            | KEDLVFIFWAPESAPLK                | 95   | 17 | 8  | 59.77  | b4b8b9y3y7y8y9y17                                                             | 1990.05 | 98.097  | 172092 | 3 | 664.02  | -6.87  |
| P23528 COF1_HUMAN Cofilin-1        | 4   |                                            | YALYDATYETK                      | 81   | 11 | 9  | 64.42  | b2b3b8y2y4y8y9y10y11                                                          | 1337.63 | 53.023  | 158600 | 2 | 669.32  | 1.28   |
| P23528 COF1_HUMAN Cofilin-1        | 5   |                                            | EILVGDVGQTVDDPYATFVK             | 53   | 20 | 21 | 129.25 | b2*b2b3b6b13b16*b16b17*b17y1y2y3y4y7y8y10y11y15y16*y16y20                     | 2166.12 | 81.554  | 158380 | 2 | 1083.56 | 11.61  |
| P23528 COF1_HUMAN Cofilin-1        | 6   | Carbamidomethyl+C(7)                       | MLPDKDCR                         | 73   | 8  | 7  | 54.41  | y2y3y4y5*y5y6y8                                                               | 1034.47 | 22.099  | 20750  | 2 | 517.74  | -1.65  |
| P23528 COF1_HUMAN Cofilin-1        | 7   | Carbamidomethyl+C(5)                       | AVLFLCSEDK                       | 34   | 10 | 3  | 28.89  | b5b6y5                                                                        | 1181.57 | 49.656  | 3630   | 3 | 394.53  | -10.43 |
| P23528 COF1_HUMAN Cofilin-1        | 8   |                                            | VFNDMK                           | 13   | 6  | 3  | 27.01  | y4y5y5                                                                        | 753.35  | 31.755  | 19907  | 2 | 377.18  | -8.51  |
| P23528 COF1_HUMAN Cofilin-1        | 9   |                                            | MASGVAVSDGVK                     | 0    | 13 | 3  | 20.83  | b7y4y12                                                                       | 1233.64 | 70.028  | 5316   | 3 | 411.89  | -4.95  |
| P23528 COF1_HUMAN Cofilin-1        | 10  | Carbamidomethyl+C(3)                       | LFCLSEDKK                        | 36   | 9  | 1  | 7.9    | b3                                                                            | 1139.58 | 57.998  | 104136 | 2 | 570.29  | 0.11   |
| P23528 COF1_HUMAN Cofilin-1        | 11  | Carbamidomethyl+C(4)                       | VLFLSEDKK                        | 35   | 10 | 0  | 2.38   |                                                                               | 1238.65 | 58.053  | 10712  | 2 | 619.83  | 2.66   |
| P07996 TSP1_HUMAN Thrombospondin-1 | 1   |                                            | FVFGTTPEDILR                     | 216  | 12 | 17 | 114.73 | b2b5*b5b6*b6b12y1y2y3y4y6y7y8y9y10y12                                         | 1394.72 | 83.043  | 363231 | 2 | 697.87  | -5.69  |
| P07996 TSP1_HUMAN Thrombospondin-1 | 2   |                                            | FTGSQPFQGGVEHATANK               | 623  | 18 | 28 | 164.69 | b2*b2b4*b4b5*b5b12b13b14b17y1y2*y2y3y4y6*y6y7*y7y9y10*y10*y10y11y13*y13y16y18 | 1875.89 | 45.236  | 216779 | 3 | 625.97  | -5.86  |

|                                    |    |                                                                          |                                |      |    |    |        |                                                                              |         |         |        |   |         |        |
|------------------------------------|----|--------------------------------------------------------------------------|--------------------------------|------|----|----|--------|------------------------------------------------------------------------------|---------|---------|--------|---|---------|--------|
| P07996 TSP1_HUMAN Thrombospondin-1 | 3  |                                                                          | TIVTTLQDSIR                    | 288  | 11 | 13 | 101.03 | b1°b1b2°b2b3y3y4y5y6y7y8y9y11                                                | 1246.70 | 68.415  | 213968 | 2 | 623.85  | -2.25  |
| P07996 TSP1_HUMAN Thrombospondin-1 | 4  |                                                                          | GGVNDNFQGVLQNVVR               | 201  | 15 | 22 | 185.75 | b2b3b6°b6b10b11b12b13y2y3°y3y4°y4y6y7y8y9y10y11y12y15°y15                    | 1616.82 | 66.703  | 200037 | 2 | 808.92  | 6.27   |
| P07996 TSP1_HUMAN Thrombospondin-1 | 5  |                                                                          | GDPSSPAFR                      | 50   | 10 | 16 | 132.02 | b2b3°b3b4b5b7y2y4y5°y5y6°y6y7y8y9y10                                         | 1030.49 | 36.719  | 176301 | 2 | 515.75  | -0.59  |
| P07996 TSP1_HUMAN Thrombospondin-1 | 6  |                                                                          | MENAELDVPIQSVFTR               | 173  | 16 | 19 | 158.07 | b3b4b7b8b11°b11b12b13°b13y1y3y4y5y6°y6y8y10y11y16                            | 1848.92 | 82.175  | 170911 | 2 | 924.96  | -0.13  |
| P07996 TSP1_HUMAN Thrombospondin-1 | 7  |                                                                          | GTSQNDPNWVVR                   | 968  | 12 | 7  | 45.2   | y2y3y4y6y10°y10y12                                                           | 1372.66 | 48.042  | 165600 | 2 | 686.84  | 2.22   |
| P07996 TSP1_HUMAN Thrombospondin-1 | 8  |                                                                          | AQGYSGLSVK                     | 1054 | 10 | 9  | 68.5   | b2°b2b10y3y4y5y6y8y10                                                        | 1009.52 | 39.493  | 140168 | 2 | 505.27  | -6.53  |
| P07996 TSP1_HUMAN Thrombospondin-1 | 9  | Carbamidomethyl+C(2);<br>Carbamidomethyl+C(14)                           | LCNSPSPQMNGKPCGEAR             | 460  | 19 | 27 | 210.52 | b2b3b4°b4b8b19y2y4y5y6y7y8°y8y9y10°y10y11°y11°y11°y12°y12°y13y15y16y17y18y19 | 2131.92 | 31.941  | 134441 | 3 | 711.31  | -3.32  |
| P07996 TSP1_HUMAN Thrombospondin-1 | 10 | Carbamidomethyl+C(7)                                                     | AQLYIDCEK                      | 164  | 9  | 9  | 68.11  | b2°b2y3y4y5y6y7°y7y9                                                         | 1139.54 | 43.557  | 134223 | 2 | 570.27  | -1.29  |
| P07996 TSP1_HUMAN Thrombospondin-1 | 11 |                                                                          | FQMIPLDPK                      | 959  | 9  | 6  | 30.71  | b2°b2b3b7y5y9                                                                | 1088.58 | 70.177  | 130622 | 2 | 544.79  | -0.90  |
| P07996 TSP1_HUMAN Thrombospondin-1 | 12 | Carbamidomethyl+C(3)                                                     | DNCQYVYNVDQR                   | 810  | 12 | 6  | 49.97  | y2y5y6y7y8y12                                                                | 1573.68 | 44.634  | 122517 | 2 | 787.34  | 4.96   |
| P07996 TSP1_HUMAN Thrombospondin-1 | 13 |                                                                          | NALWHTGNTPGQVR                 | 1077 | 14 | 5  | 45.03  | y4y5y9y10y14                                                                 | 1550.76 | 45.896  | 108266 | 3 | 517.59  | -11.18 |
| P07996 TSP1_HUMAN Thrombospondin-1 | 14 | Carbamidomethyl+C(11);<br>Carbamidomethyl+C(14)                          | DTDMDGVGDQCDCNCPLEHNPDQLDSDSDR | 822  | 29 | 5  | 24.97  | y3y10y22y24y29                                                               | 3320.29 | 52.944  | 74273  | 3 | 1107.43 | 6.91   |
| P07996 TSP1_HUMAN Thrombospondin-1 | 15 |                                                                          | LVPNPDQK                       | 911  | 8  | 7  | 57.42  | y2y3y4y6°y6y7y8                                                              | 910.49  | 28.476  | 64644  | 2 | 455.75  | -6.10  |
| P07996 TSP1_HUMAN Thrombospondin-1 | 16 |                                                                          | GFLLLASLR                      | 86   | 9  | 8  | 62.09  | b2b3y1y2y4y5y6y7                                                             | 989.61  | 90.741  | 63478  | 2 | 495.31  | -7.65  |
| P07996 TSP1_HUMAN Thrombospondin-1 | 17 | Carbamidomethyl+C(2)                                                     | LCNNPTQFGGK                    | 517  | 12 | 12 | 79.37  | b2b6°b6b9y1y3y6y8°y8y9y10y12                                                 | 1332.64 | 40.266  | 60864  | 2 | 666.82  | 2.93   |
| P07996 TSP1_HUMAN Thrombospondin-1 | 18 |                                                                          | GTLALER                        | 101  | 8  | 7  | 54.41  | y2°y2y3y4y5y6y8                                                              | 872.52  | 57.162  | 56872  | 2 | 436.76  | -3.15  |
| P07996 TSP1_HUMAN Thrombospondin-1 | 19 |                                                                          | QVTQSYWDTNPTR                  | 1041 | 13 | 8  | 41.62  | b13°b13y4y5y7y11°y11y13                                                      | 1595.75 | 49.855  | 53992  | 2 | 798.38  | 4.13   |
| P07996 TSP1_HUMAN Thrombospondin-1 | 20 | Carbamidomethyl+C(6);<br>Carbamidomethyl+C(10)                           | DLQAICGISCDELSSMVLELR          | 264  | 21 | 11 | 82.25  | b3y2y3°y3y4y5y7y8y11y12y16                                                   | 2409.14 | 102.704 | 53890  | 3 | 803.72  | -4.15  |
| P07996 TSP1_HUMAN Thrombospondin-1 | 21 |                                                                          | IPESGGDNSVDFIFELTGAAR          | 20   | 21 | 9  | 37.42  | b3b6b13b15°b15y1y4y6y21                                                      | 2195.08 | 100.069 | 49024  | 2 | 1098.04 | 6.67   |
| P07996 TSP1_HUMAN Thrombospondin-1 | 22 |                                                                          | VTEENKELANELR                  | 300  | 13 | 8  | 25.6   | b2b3°b3y1y2y6y7y13                                                           | 1544.78 | 42.155  | 38332  | 3 | 515.60  | -7.19  |
| P07996 TSP1_HUMAN Thrombospondin-1 | 23 | Carbamidomethyl+C(2);<br>Carbamidomethyl+C(14);<br>Carbamidomethyl+C(24) | LCNNPTQFGGKDCVGDVTENQICNK      | 517  | 26 | 9  | 40.51  | b2b4b10°b10y3y11y12y13y26                                                    | 2965.33 | 53.175  | 36427  | 3 | 989.12  | 2.88   |
| P07996 TSP1_HUMAN Thrombospondin-1 | 24 | Carbamidomethyl+C(2);<br>Carbamidomethyl+C(7)                            | TCHIQCEDKR                     | 421  | 10 | 20 | 135.03 | b2°b2b3°b3b4°b4b6b8y2y3y4°y4y5°y5y6°y6°y6y7y8y10                             | 1346.58 | 14.904  | 36184  | 3 | 449.53  | -14.14 |
| P07996 TSP1_HUMAN Thrombospondin-1 | 25 |                                                                          | IMADSGPIYDK                    | 1130 | 11 | 3  | 24.51  | b9y3y9                                                                       | 1209.58 | 44.912  | 29321  | 2 | 605.29  | -2.02  |



|                                    |    |                                                                                                                             |                                          |      |    |    |        |                                                                                                    |         |         |        |   |         |        |
|------------------------------------|----|-----------------------------------------------------------------------------------------------------------------------------|------------------------------------------|------|----|----|--------|----------------------------------------------------------------------------------------------------|---------|---------|--------|---|---------|--------|
| P07996 TSP1_HUMAN Thrombospondin-1 | 26 |                                                                                                                             | IEDANLIPPVPDDK                           | 60   | 14 | 4  | 19.47  | b4b12y3°y3                                                                                         | 1535.79 | 62.826  | 18682  | 2 | 768.40  | -2.46  |
| P07996 TSP1_HUMAN Thrombospondin-1 | 27 |                                                                                                                             | VVMYEGKK                                 | 1122 | 8  | 3  | 41.1   | y3y4y5                                                                                             | 953.50  | 25.300  | 5841   | 2 | 477.25  | -13.51 |
| P07996 TSP1_HUMAN Thrombospondin-1 | 28 | Carbamidomethyl+C(8)                                                                                                        | ELVQTVNCDPGLAVGYDEFNAVD<br>FSGTFFINTER   | 984  | 34 | 4  | 11.02  | b7b10°b10y3                                                                                        | 3824.81 | 106.664 | 3180   | 4 | 956.96  | 8.74   |
| P07996 TSP1_HUMAN Thrombospondin-1 | 29 | Carbamidomethyl+C(3);<br>Carbamidomethyl+C(10)                                                                              | NPCTDGTHTDCNK                            | 647  | 12 | 5  | 45.2   | b2y4y7y9y10                                                                                        | 1418.55 | 17.978  | 2014   | 3 | 473.52  | 5.34   |
| P07996 TSP1_HUMAN Thrombospondin-1 | 30 | Carbamidomethyl+C(5)                                                                                                        | RPPLCYHNGVQYR                            | 313  | 13 | 3  | 25.6   | b4b5y4                                                                                             | 1659.81 | 37.222  | 110282 | 3 | 553.94  | -6.99  |
| P07996 TSP1_HUMAN Thrombospondin-1 | 31 | Carbamidomethyl+C(1);<br>Carbamidomethyl+C(10);<br>Carbamidomethyl+C(13)                                                    | CENTDPGYNCLPCPPR                         | 607  | 16 | 7  | 64.73  | b5b13y4y5y9y10y11                                                                                  | 1949.81 | 50.693  | 60771  | 2 | 975.41  | 8.26   |
| P07996 TSP1_HUMAN Thrombospondin-1 | 32 |                                                                                                                             | TLWHDPR                                  | 1091 | 7  | 6  | 60.03  | b3b6y3°y3y6°y6                                                                                     | 924.49  | 25.387  | 31185  | 2 | 462.75  | 20.07  |
| P07996 TSP1_HUMAN Thrombospondin-1 | 33 |                                                                                                                             | DHSGQVFSVVSNGK                           | 110  | 14 | 3  | 19.47  | b3b9y4                                                                                             | 1460.72 | 47.640  | 31082  | 2 | 730.86  | 3.26   |
| P07996 TSP1_HUMAN Thrombospondin-1 | 34 | Carbamidomethyl+C(6)                                                                                                        | EVPDACFNHNGEHR                           | 593  | 14 | 3  | 19.47  | b10y4y10                                                                                           | 1681.70 | 30.846  | 21218  | 3 | 561.24  | -7.77  |
| P07996 TSP1_HUMAN Thrombospondin-1 | 35 |                                                                                                                             | DFTAYR                                   | 1103 | 6  | 3  | 27.01  | y4°y4y5                                                                                            | 772.36  | 39.843  | 19254  | 1 | 772.36  | -4.03  |
| P07996 TSP1_HUMAN Thrombospondin-1 | 36 | Carbamidomethyl+C(15)                                                                                                       | GLAWGLGVFLMHVCGTNR                       | 1    | 19 | 10 | 63     | b3b5b7y4y6°y6y7y10°y10y11                                                                          | 2101.05 | 117.702 | 4762   | 2 | 1051.03 | -15.80 |
| P07996 TSP1_HUMAN Thrombospondin-1 | 37 | Carbamidomethyl+C(3);<br>Carbamidomethyl+C(8);<br>Carbamidomethyl+C(13)                                                     | QDCPIDGCLSNPCFAGVK                       | 543  | 18 | 6  | 25.06  | b8°b8b10°b10b12y4                                                                                  | 2037.87 | 49.017  | 3420   | 5 | 408.38  | -4.55  |
| P07996 TSP1_HUMAN Thrombospondin-1 | 38 | Carbamidomethyl+C(2)                                                                                                        | GCSSTSLLTLDNNVNGSSPAI<br>R               | 230  | 25 | 4  | 22.05  | b12°b12y12y13                                                                                      | 2548.29 | 129.214 | 3325   | 3 | 850.10  | 8.81   |
| P07996 TSP1_HUMAN Thrombospondin-1 | 39 | Carbamidomethyl+C(3);<br>Carbamidomethyl+C(18);<br>Carbamidomethyl+C(22)                                                    | DACPINGGWGPSPWDICSVTCG<br>GGVQK          | 486  | 28 | 3  | 11.78  | b10y8y11                                                                                           | 3061.38 | 96.883  | 2983   | 2 | 1531.19 | 12.20  |
| P07996 TSP1_HUMAN Thrombospondin-1 | 40 | Carbamidomethyl+C(2);<br>Carbamidomethyl+C(12)                                                                              | DCVGDVTENQICNK                           | 529  | 14 | 3  | 19.47  | b3y7y9                                                                                             | 1651.74 | 92.997  | 2334   | 2 | 826.37  | 22.25  |
| P07996 TSP1_HUMAN Thrombospondin-1 | 41 | Carbamidomethyl+C(4)                                                                                                        | SRLCENNPTQFGGK                           | 515  | 14 | 8  | 39.39  | b4°b4b12b13°b13y10°y10y12                                                                          | 1575.77 | 46.130  | 389244 | 3 | 525.93  | 1.86   |
| P07996 TSP1_HUMAN Thrombospondin-1 | 42 |                                                                                                                             | IEDANLIPPVPDDKFKQLVDAVR                  | 60   | 23 | 35 | 242.31 | b4°b4b5°b5°b5b6°b6°b6b7°b7b10°b10b13°b13b14y3y4y6y7°y7y8°y8°y8y9°y9°y9y10y11y12°y12y13y14y15y16y17 | 2579.33 | 88.828  | 326457 | 3 | 860.45  | -2.65  |
| P07996 TSP1_HUMAN Thrombospondin-1 | 43 |                                                                                                                             | VTEENKELANELR                            | 300  | 13 | 8  | 75.22  | b4b5b7b10b11°b11b12°b12                                                                            | 1544.79 | 91.593  | 204495 | 2 | 772.90  | -2.61  |
| P07996 TSP1_HUMAN Thrombospondin-1 | 44 | Carbamidomethyl+C(1);<br>Carbamidomethyl+C(4);<br>Carbamidomethyl+C(15);<br>Carbamidomethyl+C(21);<br>Carbamidomethyl+C(28) | CGACPPGYSGNGIQCTDVDECKE<br>VPDACFNHNGEHR | 571  | 36 | 3  | 10.91  | b4b7y12                                                                                            | 4107.62 | 49.998  | 28179  | 5 | 822.33  | -7.49  |
| P07996 TSP1_HUMAN Thrombospondin-1 | 45 |                                                                                                                             | IMADSGPIYDKTYAGGR                        | 1130 | 17 | 3  | 25.13  | y8y9y15                                                                                            | 1814.86 | 47.857  | 23070  | 3 | 605.63  | -5.58  |

|                                           |    |                                                                          |                              |      |    |    |        |                                                                                         |         |        |        |   |         |        |
|-------------------------------------------|----|--------------------------------------------------------------------------|------------------------------|------|----|----|--------|-----------------------------------------------------------------------------------------|---------|--------|--------|---|---------|--------|
| P07996 TSP1_HUMAN Thrombospondin-1        | 46 | Carbamidomethyl+C(8)                                                     | IPDDRDNCPFHYNPAQYDYDR        | 746  | 21 | 5  | 41.19  | b9b10b11y3y6                                                                            | 2671.15 | 47.789 | 21898  | 4 | 668.54  | 10.15  |
| P07996 TSP1_HUMAN Thrombospondin-1        | 47 | Carbamidomethyl+C(1);<br>Carbamidomethyl+C(11);<br>Carbamidomethyl+C(16) | CEGSSVQTRTCHIQCCK            | 412  | 18 | 3  | 22.89  | y3y11y13                                                                                | 2194.92 | 62.884 | 6555   | 2 | 1097.97 | -2.00  |
| P07996 TSP1_HUMAN Thrombospondin-1        | 48 | Carbamidomethyl+C(2);<br>Carbamidomethyl+C(14)                           | LCNSPSPQMNGKPCGEARETK        | 460  | 22 | 4  | 24.43  | b4y9y13y14                                                                              | 2490.08 | 94.903 | 5929   | 3 | 830.70  | -14.41 |
| P07996 TSP1_HUMAN Thrombospondin-1        | 49 |                                                                          | KDHSGQVFSVVSNGK              | 109  | 15 | 4  | 26.4   | y3y4y14*y14                                                                             | 1588.81 | 86.201 | 2473   | 3 | 530.28  | 4.23   |
| P07996 TSP1_HUMAN Thrombospondin-1        | 50 | Carbamidomethyl+C(2);<br>Carbamidomethyl+C(14);<br>Oxidation+M(9)        | LCNSPSPQMNGKPCGEAR           | 460  | 19 | 3  | 24.26  | y5y7y8                                                                                  | 2147.90 | 25.477 | 1786   | 3 | 716.64  | -11.48 |
| P07996 TSP1_HUMAN Thrombospondin-1        | 51 |                                                                          | LWHTGNTPGQVR                 | 1079 | 12 | 0  | 3.57   |                                                                                         | 1365.69 | 45.950 | 3628   | 2 | 683.35  | -12.16 |
| P07996 TSP1_HUMAN Thrombospondin-1        | 52 |                                                                          | VMYEGKK                      | 1123 | 7  | 0  | 1.19   |                                                                                         | 854.44  | 25.305 | 2687   | 2 | 427.72  | -3.64  |
| P07996 TSP1_HUMAN Thrombospondin-1        | 53 |                                                                          | LLLASLR                      | 88   | 7  | 0  | 1.59   |                                                                                         | 785.52  | 90.735 | 2625   | 2 | 393.26  | -7.93  |
| P07996 TSP1_HUMAN Thrombospondin-1        | 54 |                                                                          | GTLLALER                     | 101  | 8  | 0  | 1.19   |                                                                                         | 854.50  | 57.163 | 6605   | 2 | 427.75  | -7.50  |
| P07996 TSP1_HUMAN Thrombospondin-1        | 55 |                                                                          | FQMIPLDPK                    | 959  | 9  | 0  | 1.59   |                                                                                         | 1071.56 | 70.179 | 2545   | 2 | 536.29  | 11.73  |
| P02775 CXCL7_HUMAN Platelet basic protein | 1  |                                                                          | NIQSLEVIGK                   | 75   | 10 | 17 | 100.64 | b1*b1b2*b2b4b8y1y2y3y4y5y6y7y8*y8*y8y10                                                 | 1100.63 | 57.112 | 943889 | 2 | 550.82  | -4.44  |
| P02775 CXCL7_HUMAN Platelet basic protein | 2  | Carbamidomethyl+C(2)                                                     | ICLDPDAPR                    | 103  | 9  | 12 | 89.95  | b2b4b5*b5y2y3y5*y5y6y7y8y9                                                              | 1056.51 | 47.266 | 874294 | 2 | 528.76  | -6.24  |
| P02775 CXCL7_HUMAN Platelet basic protein | 3  |                                                                          | GKEESLSDLYAELR               | 47   | 15 | 32 | 256.75 | b2b3*b3b4*b4b6*b6b7b9*b9b10*b10b11b12b14y1y2y3*y3y4y5y6y7*y7y8y10y11y12*y12y13*y13y15   | 1724.82 | 64.985 | 719820 | 3 | 575.61  | -8.49  |
| P02775 CXCL7_HUMAN Platelet basic protein | 4  | Carbamidomethyl+C(4)                                                     | GTHCNQVEVIATLK               | 85   | 14 | 4  | 19.47  | b7y5y7y14                                                                               | 1569.80 | 53.654 | 8488   | 2 | 785.41  | -0.62  |
| P02775 CXCL7_HUMAN Platelet basic protein | 5  |                                                                          | EESLSDLYAELR                 | 49   | 13 | 4  | 28.31  | b9b10b12y13                                                                             | 1539.73 | 88.849 | 1935   | 2 | 770.37  | 5.39   |
| P02775 CXCL7_HUMAN Platelet basic protein | 6  | Carbamidomethyl+C(3)                                                     | KICLDPDAPR                   | 102  | 10 | 7  | 87.33  | b5b7b8y3y5y7y8                                                                          | 1184.61 | 41.833 | 95243  | 2 | 592.81  | -1.44  |
| P02775 CXCL7_HUMAN Platelet basic protein | 7  |                                                                          | QSLEVIGK                     | 77   | 8  | 8  | 37.12  | b3*b3*b3b4*b4b5*b5*b5                                                                   | 873.51  | 57.128 | 23453  | 1 | 873.51  | 5.03   |
| P02775 CXCL7_HUMAN Platelet basic protein | 8  |                                                                          | LDPDAPR                      | 105  | 7  | 2  | 23.42  | b3b4                                                                                    | 783.40  | 47.256 | 13167  | 1 | 783.40  | 1.48   |
| P69905 HBA_HUMAN Hemoglobin subunit alpha | 1  |                                                                          | VGAHAGEYGAEALER              | 17   | 15 | 23 | 203.03 | b1b4b5b6b7b8b9*b9b10*b10b11b12y1y2y3y4y5y6y7y10*y10y11y15                               | 1529.72 | 40.729 | 750086 | 3 | 510.58  | -12.61 |
| P69905 HBA_HUMAN Hemoglobin subunit alpha | 2  |                                                                          | VADALNAVAHVDDMPNALSALSDLHAHK | 62   | 29 | 32 | 213.01 | b2b3b4b5b6*b6b7*b7b14*b14*b14b15*b15y2y3y4y5y6y7*y7y8y9*y9y10*y10y11y14*y14y24y25y27y29 | 2996.46 | 88.688 | 671324 | 4 | 749.87  | -8.72  |
| P69905 HBA_HUMAN Hemoglobin subunit alpha | 3  |                                                                          | MFLSFPTTK                    | 32   | 9  | 15 | 88.7   | b2b3y1y2*y2y3y4*y4y5*y5y6y7*y7y8y9                                                      | 1071.55 | 74.590 | 462699 | 2 | 536.28  | -3.65  |

|                                            |    |                       |                                          |     |    |    |        |                                                               |         |         |        |   |         |        |
|--------------------------------------------|----|-----------------------|------------------------------------------|-----|----|----|--------|---------------------------------------------------------------|---------|---------|--------|---|---------|--------|
| [P69905]HBA_HUMAN Hemoglobin subunit alpha | 4  | Carbamidomethyl+C(5)  | LLSHCLLVTLAAHLPAEFTPAVHASLDK             | 100 | 28 | 5  | 20.77  | b6b19y6y10y12                                                 | 3024.60 | 96.210  | 161358 | 4 | 756.90  | -12.67 |
| [P69905]HBA_HUMAN Hemoglobin subunit alpha | 5  |                       | VDPVNFK                                  | 93  | 7  | 3  | 40.71  | b3y3y6                                                        | 818.43  | 43.180  | 107691 | 2 | 409.72  | -11.19 |
| [P69905]HBA_HUMAN Hemoglobin subunit alpha | 6  |                       | MVLSPADK                                 | 0   | 8  | 3  | 33.32  | b7y4y5                                                        | 860.45  | 55.486  | 16853  | 2 | 430.73  | -2.41  |
| [P69905]HBA_HUMAN Hemoglobin subunit alpha | 7  |                       | AAWGK                                    | 12  | 5  | 1  | 13.3   | b4                                                            | 532.28  | 95.115  | 1547   | 1 | 532.28  | -11.81 |
| [P69905]HBA_HUMAN Hemoglobin subunit alpha | 8  |                       | MFLSFPTTKTYPPHFDLSHGSAQVK                | 32  | 25 | 3  | 18.73  | b3b8b12                                                       | 2886.46 | 116.619 | 6237   | 3 | 962.82  | 9.47   |
| [P69905]HBA_HUMAN Hemoglobin subunit alpha | 9  |                       | AAWGKVGAHAGEYGAEALER                     | 12  | 20 | 4  | 14.51  | b12b16y12*y12                                                 | 2042.99 | 74.118  | 5848   | 2 | 1022.00 | -6.27  |
| [P69905]HBA_HUMAN Hemoglobin subunit alpha | 10 | Carbamidomethyl+C(5)  | LLSHCLLVTLAAHLPAEFTPAVHASLDKFLASVSTVLTSK | 100 | 40 | 10 | 59.52  | b3b5b6*b6b7b13b14y3y4y7                                       | 4258.34 | 135.936 | 5445   | 4 | 1065.34 | 2.52   |
| [P69905]HBA_HUMAN Hemoglobin subunit alpha | 11 |                       | PNALSALSDLHAHK                           | 77  | 14 | 4  | 22.51  | b4*b4b5*b5                                                    | 1473.76 | 88.680  | 6921   | 3 | 491.92  | -14.00 |
| [P69905]HBA_HUMAN Hemoglobin subunit alpha | 12 |                       | ALSALSDLHAHK                             | 79  | 12 | 0  | 9.52   |                                                               | 1262.68 | 88.727  | 2870   | 2 | 631.84  | -5.70  |
| [P69905]HBA_HUMAN Hemoglobin subunit alpha | 13 |                       | VAHVDDMPNALSALSDLHAHK                    | 70  | 21 | 3  | 17.56  | b5b7b17                                                       | 2241.09 | 88.715  | 2310   | 3 | 747.70  | -9.48  |
| [P68366]TBA4A_HUMAN Tubulin alpha-4A chain | 1  |                       | QLFHPEQLITGKEDAANNYAR                    | 84  | 21 | 8  | 53.21  | y3y5y6y9y10y12y21*y21                                         | 2415.18 | 62.326  | 354393 | 4 | 604.55  | -8.79  |
| [P68366]TBA4A_HUMAN Tubulin alpha-4A chain | 2  |                       | VGINYQPPTVVPGGDLAK                       | 352 | 18 | 15 | 69.5   | b1b5*b5b6*b6b10b11*b11y1y2y3y7y8y12y18                        | 1825.00 | 66.011  | 249834 | 2 | 913.00  | 5.75   |
| [P68366]TBA4A_HUMAN Tubulin alpha-4A chain | 3  |                       | AVFVDLEPTVIDEIR                          | 64  | 15 | 24 | 219.35 | b3b4b5*b5b6b7b10*b10b11b12y2y3*y3y4*y4y5y7y8y9*y9y10y11y13y15 | 1715.92 | 89.312  | 152026 | 2 | 858.47  | 1.42   |
| [P68366]TBA4A_HUMAN Tubulin alpha-4A chain | 4  | Carbamidomethyl+C(8)  | SIQFVDWCPTGFK                            | 339 | 13 | 19 | 149.02 | b2b3*b3b4b5*b5*b5b6*b6b12*b12y3y4y5y6y7y9y10y13               | 1584.76 | 83.082  | 143941 | 2 | 792.88  | 5.47   |
| [P68366]TBA4A_HUMAN Tubulin alpha-4A chain | 5  |                       | NLDIERPTYTNLNR                           | 215 | 14 | 11 | 40.18  | b2*b2b3b5*b5y7y10*y10y12*y12y14                               | 1718.87 | 52.991  | 135862 | 3 | 573.63  | -8.45  |
| [P68366]TBA4A_HUMAN Tubulin alpha-4A chain | 6  |                       | IHFPLATYAPVISA EK                        | 264 | 16 | 5  | 17.33  | b2b3b8y2y4                                                    | 1756.94 | 78.557  | 95386  | 3 | 586.32  | -12.65 |
| [P68366]TBA4A_HUMAN Tubulin alpha-4A chain | 7  |                       | EIIDPVLDR                                | 112 | 9  | 5  | 54.8   | y4y5y6y7y9                                                    | 1069.59 | 60.023  | 81861  | 2 | 535.30  | 1.60   |
| [P68366]TBA4A_HUMAN Tubulin alpha-4A chain | 8  |                       | EDMAALEK                                 | 422 | 8  | 7  | 54.41  | y1y2y3y4y5y7y8                                                | 906.42  | 36.796  | 59905  | 2 | 453.72  | 0.54   |
| [P68366]TBA4A_HUMAN Tubulin alpha-4A chain | 9  | Carbamidomethyl+C(15) | AYHEQLSVAEITNACFEPANQMVK                 | 280 | 24 | 4  | 28.15  | y4y7y9y13                                                     | 2750.32 | 73.693  | 53120  | 3 | 917.44  | 9.94   |
| [P68366]TBA4A_HUMAN Tubulin alpha-4A chain | 10 |                       | LSVDYGKK                                 | 156 | 8  | 6  | 54.41  | b2y3y4y5y7y8                                                  | 909.50  | 29.936  | 32828  | 2 | 455.25  | -9.13  |
| [P68366]TBA4A_HUMAN Tubulin alpha-4A chain | 11 |                       | FDGALNVDLTEFQTNLVPYPR                    | 243 | 21 | 13 | 76.54  | b2b3b4b17y2y3y4y5y6y11*y11y14y21                              | 2409.23 | 95.114  | 30203  | 2 | 1205.12 | 7.40   |
| [P68366]TBA4A_HUMAN Tubulin alpha-4A chain | 12 |                       | LISQIVSSITASLR                           | 229 | 14 | 4  | 27.84  | b4b6y4y8                                                      | 1487.89 | 100.447 | 13968  | 2 | 744.45  | 5.17   |
| [P68366]TBA4A_HUMAN Tubulin alpha-4A chain | 13 | Carbamidomethyl+C(14) | TIGGGDSDSFTTFFCETGAGK                    | 40  | 20 | 10 | 37.99  | b3*b3b14*b14y6*y6y7y9y14*y14                                  | 2067.92 | 81.576  | 74505  | 2 | 1034.47 | 13.46  |
| [P68366]TBA4A_HUMAN Tubulin alpha-4A chain | 14 | Carbamidomethyl+C(5)  | LSDQCTGLQGLVHFHSGGGTGS<br>GFTSLLMER      | 124 | 32 | 5  | 35.63  | b14y3y4*y4y5                                                  | 3406.62 | 105.498 | 8590   | 3 | 1136.21 | -0.07  |
| [P68366]TBA4A_HUMAN Tubulin alpha-4A chain | 15 | Carbamidomethyl+C(3)  | AVCMLSNTTAAAEAWAR                        | 373 | 17 | 4  | 23.47  | b15y12y13*y13                                                 | 1864.95 | 136.785 | 4817   | 1 | 1864.95 | 22.32  |
| [P68366]TBA4A_HUMAN Tubulin alpha-4A chain | 16 |                       | RNLDIRPTYTNLNR                           | 214 | 15 | 4  | 26.06  | b4b6y6y11                                                     | 1874.97 | 114.989 | 2077   | 3 | 625.66  | -8.27  |
| [P68366]TBA4A_HUMAN Tubulin alpha-4A chain | 17 |                       | EIIDPVLDR                                | 112 | 9  | 0  | 1.59   |                                                               | 1051.57 | 60.025  | 4582   | 2 | 526.29  | 0.12   |

|                            |    |  |                                  |      |    |    |        |                                                                                  |         |         |        |   |         |        |
|----------------------------|----|--|----------------------------------|------|----|----|--------|----------------------------------------------------------------------------------|---------|---------|--------|---|---------|--------|
| P18206 VINC_HUMAN Vinculin | 1  |  | LTDELAPPKPLPEGEVPPRPPPP<br>EEK   | 853  | 28 | 7  | 34.68  | b12y6y9°y9y11y16y22                                                              | 3023.60 | 60.949  | 201776 | 4 | 756.65  | -3.80  |
| P18206 VINC_HUMAN Vinculin | 2  |  | TIESILEPVAQQISHLVIMHEEGEV<br>DGK | 7    | 28 | 26 | 201.36 | b2°b2b3°b3b4°b4b5°b5y<br>2y3y4y6y7y8y9y10y11y<br>14y15y21y22*y22y23y2<br>5y26y28 | 3101.56 | 111.236 | 165254 | 4 | 776.15  | -6.77  |
| P18206 VINC_HUMAN Vinculin | 3  |  | AVAGNISDPGLQK                    | 802  | 13 | 11 | 113.88 | b2b8y3y5y6y7y8y9y10y<br>11y13                                                    | 1269.67 | 40.695  | 155126 | 2 | 635.34  | -4.61  |
| P18206 VINC_HUMAN Vinculin | 4  |  | AQVVSQGLDVLTAQ                   | 352  | 14 | 18 | 108.04 | b2*b2b3*b3b4b5°b5b9y<br>1y2y3y4y8y10y11y12*y<br>12y14                            | 1457.80 | 58.380  | 134709 | 2 | 729.41  | 5.95   |
| P18206 VINC_HUMAN Vinculin | 5  |  | AIPDLTAPVAAVQAAVSNLVR            | 35   | 21 | 23 | 147.45 | b2b3b5b6°b6b7°b7y1y2<br>y3y4*y4y5*y5y6y7*y7y<br>8y14y15y16y19y21                 | 2076.19 | 118.545 | 131840 | 2 | 1038.60 | 6.11   |
| P18206 VINC_HUMAN Vinculin | 6  |  | VAMANIQQMLVAGATSIAR              | 738  | 20 | 14 | 80.55  | b1b3b4b5b10b14y1y2y7<br>y8y13*y13y14y20                                          | 2042.11 | 84.446  | 109736 | 2 | 1021.56 | 10.28  |
| P18206 VINC_HUMAN Vinculin | 7  |  | GWLDRPSASPGDAGEQAIR              | 281  | 19 | 8  | 33.67  | b2b9°b9y2y3y7y9y10                                                               | 1982.96 | 54.137  | 105439 | 3 | 661.66  | -4.19  |
| P18206 VINC_HUMAN Vinculin | 8  |  | TNISDEESEQATEMLVHNAQNLM<br>QSVK  | 1076 | 27 | 10 | 37.76  | b2°b2b3b6y3y5y10y24y<br>25y27                                                    | 3046.42 | 96.718  | 90486  | 3 | 1016.14 | 2.89   |
| P18206 VINC_HUMAN Vinculin | 9  |  | LVQAAQMLQSDPYSVPAR               | 87   | 18 | 20 | 140.79 | b1b2b10b13b14b15°b15<br>y1y3y6y7y8°y8y9°y9y10<br>y11y13y14y18                    | 1974.03 | 66.220  | 88487  | 2 | 987.52  | 9.65   |
| P18206 VINC_HUMAN Vinculin | 10 |  | VMLVNSMNTVK                      | 188  | 11 | 9  | 41.79  | b2b6°b6y7y8°y8y9°y9y1<br>1                                                       | 1235.65 | 55.174  | 86188  | 2 | 618.33  | 1.19   |
| P18206 VINC_HUMAN Vinculin | 11 |  | QVATALQNLQTK                     | 464  | 12 | 19 | 114.06 | b2°b2b3°b3b12y1y2y3°<br>y3*y3y4y5y6*y6y7y9y1<br>0y11y12                          | 1314.74 | 48.972  | 86142  | 2 | 657.87  | 0.00   |
| P18206 VINC_HUMAN Vinculin | 12 |  | ELTPQVVSAAR                      | 669  | 11 | 12 | 101.03 | b2b10y1y3y4y5y6y7y8*<br>y8y9y11                                                  | 1170.65 | 46.207  | 83481  | 2 | 585.83  | 1.25   |
| P18206 VINC_HUMAN Vinculin | 13 |  | LLAVAATAPPDAPNREEVFDER           | 607  | 22 | 10 | 44.93  | b2b3y1y2y11y14y16y17<br>y18y22                                                   | 2381.21 | 62.157  | 80780  | 3 | 794.41  | 1.54   |
| P18206 VINC_HUMAN Vinculin | 14 |  | ELLPVLISAMK                      | 199  | 11 | 10 | 87.73  | b2°b2b3y3y4y5y6y8y9y<br>11                                                       | 1213.72 | 91.696  | 78680  | 2 | 607.36  | -1.41  |
| P18206 VINC_HUMAN Vinculin | 15 |  | STVEGIQASVK                      | 655  | 11 | 8  | 50.83  | b2°b2y4°y4y6y7y9y11                                                              | 1118.59 | 40.321  | 74758  | 2 | 559.80  | -11.35 |
| P18206 VINC_HUMAN Vinculin | 16 |  | ALASQLQDSLK                      | 570  | 11 | 5  | 24.51  | b2b5y3y9y11                                                                      | 1173.64 | 55.006  | 74596  | 2 | 587.32  | -6.86  |
| P18206 VINC_HUMAN Vinculin | 17 |  | VLQLTSWDEDAWASK                  | 246  | 15 | 7  | 40.28  | b8y5y8y11y12°y12y15                                                              | 1748.86 | 79.907  | 73183  | 2 | 874.94  | 9.00   |
| P18206 VINC_HUMAN Vinculin | 18 |  | LLAVAATAPPDAPNR                  | 607  | 15 | 10 | 73.79  | b2y1y3y4y7y8y10y11°y<br>11y15                                                    | 1476.83 | 51.299  | 66789  | 2 | 738.92  | 5.62   |
| P18206 VINC_HUMAN Vinculin | 19 |  | ETVQTTEDQILKR                    | 59   | 13 | 13 | 93.29  | b2°b2y1y2y3y4y5*y5y6<br>y7y8y9y13                                                | 1560.81 | 47.368  | 60965  | 3 | 520.94  | -6.80  |
| P18206 VINC_HUMAN Vinculin | 20 |  | WIDNPTVDDR                       | 502  | 10 | 10 | 55.95  | b3b7°b7y2y6°y6y7°y7y<br>8y10                                                     | 1230.58 | 48.498  | 59108  | 2 | 615.79  | 0.10   |
| P18206 VINC_HUMAN Vinculin | 21 |  | MALLMAEMSR                       | 993  | 10 | 7  | 55.95  | b3b5y1y5y6y7y10                                                                  | 1152.56 | 72.914  | 50791  | 2 | 576.78  | 2.65   |
| P18206 VINC_HUMAN Vinculin | 22 |  | AGEVINQPMMAAR                    | 889  | 14 | 18 | 157.95 | b3b4b5b6b7°b7b12°b12<br>b13°b13y3y4y5y6y9y13<br>y14*y14                          | 1518.74 | 59.014  | 50550  | 2 | 759.87  | 8.84   |
| P18206 VINC_HUMAN Vinculin | 23 |  | MQEAMTQEVSDVFSDTTPIK             | 586  | 21 | 6  | 31.02  | y2y3y11y14y16y21                                                                 | 2358.12 | 80.889  | 46770  | 2 | 1179.56 | 14.18  |
| P18206 VINC_HUMAN Vinculin | 24 |  | GQGSSPVAMQK                      | 341  | 11 | 13 | 87.73  | b2°b2b7°b7y1y3y4*y4y<br>6y7y8y9y11                                               | 1089.54 | 26.866  | 27314  | 2 | 545.27  | -0.45  |
| P18206 VINC_HUMAN Vinculin | 25 |  | DPSASPGDAGEQAIR                  | 285  | 15 | 6  | 52.71  | y7y10y11y12y14y15                                                                | 1470.69 | 35.659  | 21784  | 2 | 735.85  | 4.90   |

|                                                           |    |                       |                                      |      |    |    |        |                                                                                |         |         |        |   |         |        |
|-----------------------------------------------------------|----|-----------------------|--------------------------------------|------|----|----|--------|--------------------------------------------------------------------------------|---------|---------|--------|---|---------|--------|
| P18206 VINC_HUMAN Vinculin                                | 26 |                       | NPGNQAAEYHFETMK                      | 684  | 15 | 3  | 18.32  | b3y8y14                                                                        | 1736.78 | 47.439  | 13857  | 2 | 868.89  | 4.15   |
| P18206 VINC_HUMAN Vinculin                                | 27 |                       | QQELTHQEHR                           | 178  | 10 | 5  | 37.12  | y2y3y4*y4y5                                                                    | 1305.61 | 14.517  | 6639   | 3 | 435.88  | -11.13 |
| P18206 VINC_HUMAN Vinculin                                | 28 |                       | VLQLTSWDEDAWASKDTEAMK                | 246  | 21 | 5  | 14.01  | b1b12*b12y8y14                                                                 | 2424.14 | 76.351  | 3194   | 2 | 1212.57 | 1.31   |
| P18206 VINC_HUMAN Vinculin                                | 29 |                       | AVANSRPAK                            | 479  | 9  | 3  | 30.71  | b3b7y7                                                                         | 913.53  | 57.163  | 59786  | 2 | 457.27  | 11.63  |
| P18206 VINC_HUMAN Vinculin                                | 30 |                       | DYLDIGSR                             | 105  | 8  | 4  | 54.41  | b3b7y4y6                                                                       | 938.46  | 46.186  | 36750  | 2 | 469.73  | -2.28  |
| P18206 VINC_HUMAN Vinculin                                | 31 |                       | ILLVAK                               | 762  | 6  | 3  | 40.31  | y3y4y5                                                                         | 656.46  | 46.882  | 19365  | 2 | 328.73  | -14.32 |
| P18206 VINC_HUMAN Vinculin                                | 32 | Carbamidomethyl+C(5)  | ALIQCAK                              | 1013 | 7  | 4  | 40.71  | y3y4*y4y6                                                                      | 803.43  | 30.577  | 16199  | 2 | 402.22  | -15.80 |
| P18206 VINC_HUMAN Vinculin                                | 33 |                       | GNDIIAAAK                            | 983  | 9  | 9  | 45.77  | b5°b5*b5b6°b6*b6b8*b8y4                                                        | 872.48  | 26.926  | 8725   | 2 | 436.74  | -4.20  |
| P18206 VINC_HUMAN Vinculin                                | 34 |                       | GILEYLTVAEVVETMEDLVITYTK             | 139  | 23 | 3  | 13.16  | b22y10y16                                                                      | 2616.35 | 136.863 | 5672   | 2 | 1308.68 | 4.20   |
| P18206 VINC_HUMAN Vinculin                                | 35 |                       | LANVMMGPYR                           | 528  | 10 | 3  | 27.12  | b9y3y5                                                                         | 1151.55 | 39.806  | 3473   | 2 | 576.28  | -18.97 |
| P18206 VINC_HUMAN Vinculin                                | 36 |                       | GVGQAIR                              | 512  | 8  | 3  | 36.33  | b3y4y6                                                                         | 771.45  | 26.183  | 3370   | 2 | 386.23  | 4.51   |
| P18206 VINC_HUMAN Vinculin                                | 37 |                       | SLLDASEEAIK                          | 720  | 11 | 4  | 24.51  | b6°b6b9y4                                                                      | 1175.64 | 100.375 | 3333   | 2 | 588.32  | 19.73  |
| P18206 VINC_HUMAN Vinculin                                | 38 | Carbamidomethyl+C(5)  | VENACTK                              | 80   | 7  | 3  | 37.7   | b4b5y4                                                                         | 821.40  | 43.936  | 2494   | 2 | 411.20  | 17.98  |
| P18206 VINC_HUMAN Vinculin                                | 39 |                       | MTGLVDEAIDTK                         | 708  | 12 | 3  | 22.48  | b3b6y11                                                                        | 1292.64 | 58.003  | 2237   | 1 | 1292.64 | -1.61  |
| P18206 VINC_HUMAN Vinculin                                | 40 |                       | QLHDEAR                              | 903  | 7  | 7  | 57.02  | b3*b3b4°b4*b4y4y6                                                              | 868.43  | 86.193  | 2131   | 1 | 868.43  | 6.68   |
| P18206 VINC_HUMAN Vinculin                                | 41 |                       | LANVMMGPYRQDLLAK                     | 528  | 16 | 4  | 23.86  | b4b5y12°y12                                                                    | 1819.98 | 116.867 | 459606 | 3 | 607.33  | 12.21  |
| P18206 VINC_HUMAN Vinculin                                | 42 |                       | DIAKASDEVTR                          | 1020 | 11 | 3  | 24.51  | b3b7y8                                                                         | 1204.62 | 68.323  | 313971 | 2 | 602.82  | 6.28   |
| P18206 VINC_HUMAN Vinculin                                | 43 |                       | ARMQEAMTQEVSDVFSDTTPIK               | 584  | 23 | 8  | 63.58  | b4b7b8b11b13b16b22y3                                                           | 2585.20 | 72.936  | 52328  | 3 | 862.40  | -8.88  |
| P18206 VINC_HUMAN Vinculin                                | 44 |                       | EVENSEDPKFR                          | 769  | 11 | 5  | 31.5   | y3y4y9°y9*y9                                                                   | 1349.61 | 29.815  | 18565  | 3 | 450.54  | -13.66 |
| P18206 VINC_HUMAN Vinculin                                | 45 |                       | MTGLVDEAIDTKSLLDASEEAIK              | 708  | 23 | 4  | 17.69  | b10b14y3y7                                                                     | 2449.22 | 70.572  | 12509  | 3 | 817.08  | -6.08  |
| P18206 VINC_HUMAN Vinculin                                | 46 |                       | EAVKAASDELSK                         | 780  | 12 | 5  | 50.55  | b3b9y6y7y8                                                                     | 1247.64 | 59.053  | 9034   | 3 | 416.55  | -5.77  |
| P18206 VINC_HUMAN Vinculin                                | 47 |                       | VREAFQPQEPDFPPPPDLEQLR               | 830  | 23 | 6  | 24     | b11°b11*b11b12b22y15                                                           | 2702.34 | 136.775 | 8586   | 2 | 1351.67 | -7.05  |
| P18206 VINC_HUMAN Vinculin                                | 48 | Carbamidomethyl+C(13) | QILDEAGKVGELCAGK                     | 300  | 16 | 5  | 35.78  | b5b6b8y5y10                                                                    | 1687.84 | 63.001  | 8223   | 4 | 422.72  | -14.39 |
| P18206 VINC_HUMAN Vinculin                                | 49 |                       | DEEFPEQKAGEVINQPMMAAR                | 881  | 22 | 5  | 21.08  | b11y3y8y12*y12                                                                 | 2521.17 | 92.874  | 5619   | 2 | 1261.09 | 8.13   |
| P18206 VINC_HUMAN Vinculin                                | 50 |                       | GILEYLTVAEVVETMEDLVITYTK<br>NLGPGMTK | 139  | 31 | 4  | 11.31  | b10y3y11°y11                                                                   | 3414.71 | 119.678 | 5026   | 3 | 1138.91 | -8.65  |
| P18206 VINC_HUMAN Vinculin                                | 51 | Carbamidomethyl+C(13) | DMPPAFIKVENACTK                      | 72   | 15 | 3  | 18.32  | b8y3y12                                                                        | 1720.82 | 77.168  | 2348   | 2 | 860.91  | -13.05 |
| P18206 VINC_HUMAN Vinculin                                | 52 | Carbamidomethyl+C(6)  | EILGTCKMLGQMTDQVADLR                 | 319  | 20 | 7  | 25.47  | b12y7y11°y11y12°y12*y12                                                        | 2279.10 | 104.065 | 1622   | 3 | 760.37  | -9.11  |
| P18206 VINC_HUMAN Vinculin                                | 53 | Phosphoryl STY(8)     | ELTPQVVSAAAR                         | 669  | 11 | 4  | 24.51  | b3°b3b8_H3PO4 b8y3                                                             | 1250.60 | 99.377  | 35083  | 2 | 625.80  | -4.20  |
| P18206 VINC_HUMAN Vinculin                                | 54 | Phosphoryl STY(12)    | GILSGTSDLLTFDEAEVR                   | 113  | 19 | 5  | 15.08  | b5°b5b12°b12y7_H3PO4y7                                                         | 2115.99 | 71.411  | 5732   | 3 | 706.00  | -11.08 |
| P18206 VINC_HUMAN Vinculin                                | 55 | Phosphoryl STY(6)     | SLGEISALTSK                          | 433  | 11 | 5  | 27.52  | b4°b4b5y7°y7                                                                   | 1185.58 | 99.356  | 3037   | 3 | 395.87  | 12.36  |
| P18206 VINC_HUMAN Vinculin                                | 56 | Oxidation+M(1)        | MLGQMTDQVADLR                        | 326  | 13 | 3  | 20.83  | b10y8y11                                                                       | 1493.72 | 51.771  | 15280  | 3 | 498.58  | 9.97   |
| P18206 VINC_HUMAN Vinculin                                | 57 | Oxidation+M(5)        | TISPMVMDAK                           | 792  | 10 | 4  | 39.64  | b6b9y4y8                                                                       | 1108.54 | 38.444  | 3773   | 2 | 554.78  | 6.50   |
| P18206 VINC_HUMAN Vinculin                                | 58 | Oxidation+M(20)       | VLQLTSWDEDAWASKDTEAMK                | 246  | 21 | 3  | 14.01  | b13y3y11                                                                       | 2440.15 | 88.014  | 1853   | 2 | 1220.58 | 6.70   |
| P18206 VINC_HUMAN Vinculin                                | 59 |                       | NQAAEYHFETMK                         | 687  | 12 | 1  | 7.27   | b5                                                                             | 1468.65 | 47.429  | 4191   | 3 | 490.22  | 0.58   |
| P18206 VINC_HUMAN Vinculin                                | 60 |                       | PDLTAPVAAVQAAVSNLVR                  | 37   | 19 | 9  | 65.76  | b4°b4b5°b5b7°b7b8b9b10                                                         | 1892.04 | 118.560 | 4037   | 3 | 631.35  | -11.61 |
| P18206 VINC_HUMAN Vinculin                                | 61 |                       | ETVQTTEDQILKR                        | 59   | 13 | 0  | 3.17   |                                                                                | 1542.81 | 47.365  | 20415  | 3 | 514.94  | 3.09   |
| P18206 VINC_HUMAN Vinculin                                | 62 |                       | QQELTHQEHR                           | 178  | 10 | 1  | 8.3    | y3                                                                             | 1288.59 | 14.539  | 1744   | 3 | 430.20  | -7.01  |
| P04406 G3P_HUMAN Glyceraldehyde-3-phosphate dehydrogenase | 1  |                       | VIHDNFGIVEGLMTTVHAITATQK             | 162  | 24 | 31 | 201.86 | b2b3b4b5b6*b6b7°b7*b7b8°b8*b8b9b24y1y2*y2y3y4y5*y5y6y7y8y12y14°y14y18y21y22y24 | 2595.36 | 103.908 | 196942 | 3 | 865.79  | 1.41   |

|                                                            |    |                                             |                                     |     |    |    |        |                                                                             |         |         |        |   |         |        |
|------------------------------------------------------------|----|---------------------------------------------|-------------------------------------|-----|----|----|--------|-----------------------------------------------------------------------------|---------|---------|--------|---|---------|--------|
| P04406 G3P_HUMAN Glycer aldehyde-3-phosphate dehydrogenase | 2  | Carbamidomethyl+C(7); Carbamidomethyl+C(11) | IISNASCTTNCLAPLAK                   | 145 | 17 | 25 | 193.61 | b2b10b11b12°b12b13°b13°*b13b15b16y2y3y4y5y6y8y11y12°y12y13*y13y14y15°y15y17 | 1833.93 | 55.026  | 167645 | 2 | 917.47  | 2.86   |
| P04406 G3P_HUMAN Glycer aldehyde-3-phosphate dehydrogenase | 3  |                                             | LISWYDNEFGYSNR                      | 309 | 14 | 8  | 91.93  | y3y4y6y7y8y10y12y14                                                         | 1763.81 | 76.679  | 139674 | 2 | 882.41  | 3.39   |
| P04406 G3P_HUMAN Glycer aldehyde-3-phosphate dehydrogenase | 4  | Carbamidomethyl+C(13)                       | VPTANVSVVDLTCR                      | 234 | 14 | 13 | 119.13 | b5b12y4°y4y6y7y8y10y11y12*y12y13y14                                         | 1530.81 | 61.892  | 129237 | 2 | 765.91  | 8.53   |
| P04406 G3P_HUMAN Glycer aldehyde-3-phosphate dehydrogenase | 5  |                                             | LVINGNPITIFQERDPSK                  | 66  | 18 | 8  | 44.65  | b2y3°y3y8y12y15y16y18                                                       | 2041.10 | 77.979  | 126322 | 3 | 681.04  | -6.16  |
| P04406 G3P_HUMAN Glycer aldehyde-3-phosphate dehydrogenase | 6  |                                             | GALQNIIPASTGAAK                     | 200 | 15 | 6  | 52.04  | b4y8y9y10y11y15                                                             | 1411.80 | 60.315  | 124703 | 2 | 706.40  | 4.41   |
| P04406 G3P_HUMAN Glycer aldehyde-3-phosphate dehydrogenase | 7  |                                             | VIISAPSADAPMFVMGVNHEK               | 118 | 21 | 12 | 80.03  | b2b3y2y4y6y11y12y13y16y18y19y21                                             | 2213.10 | 75.935  | 80396  | 3 | 738.37  | -4.19  |
| P04406 G3P_HUMAN Glycer aldehyde-3-phosphate dehydrogenase | 8  |                                             | LVINGNPITIFQER                      | 66  | 14 | 7  | 42.77  | b2b3y3y4y8y11y14                                                            | 1613.90 | 84.760  | 79768  | 2 | 807.45  | -0.83  |
| P04406 G3P_HUMAN Glycer aldehyde-3-phosphate dehydrogenase | 9  |                                             | VGVNGFGR                            | 5   | 8  | 7  | 41.1   | y1y2y4y5*y5y7y8                                                             | 805.42  | 39.995  | 75777  | 2 | 403.21  | -11.59 |
| P04406 G3P_HUMAN Glycer aldehyde-3-phosphate dehydrogenase | 10 |                                             | VDIVAINDPFIDLNYVMFQYDSTHGK          | 27  | 28 | 5  | 22.8   | b1b3b5b6y2                                                                  | 3308.57 | 125.890 | 12725  | 3 | 1103.53 | 0.52   |
| P04406 G3P_HUMAN Glycer aldehyde-3-phosphate dehydrogenase | 11 |                                             | VIPELNGK                            | 219 | 8  | 4  | 41.1   | b2y4y5y7                                                                    | 869.52  | 23.836  | 2441   | 2 | 435.26  | 13.27  |
| P04406 G3P_HUMAN Glycer aldehyde-3-phosphate dehydrogenase | 12 |                                             | VVDLMAHMASK                         | 323 | 11 | 3  | 31.5   | y3y4y7                                                                      | 1201.59 | 52.798  | 23724  | 3 | 401.20  | -12.29 |
| P04406 G3P_HUMAN Glycer aldehyde-3-phosphate dehydrogenase | 13 |                                             | YDNSLK                              | 139 | 6  | 1  | 13.7   | b5                                                                          | 739.36  | 33.561  | 5292   | 1 | 739.36  | -0.33  |
| P04406 G3P_HUMAN Glycer aldehyde-3-phosphate dehydrogenase | 14 |                                             | WGDAGAEYVVESTGVFTTMEK               | 86  | 21 | 5  | 30.23  | y6y7°y7y9y11                                                                | 2277.01 | 58.706  | 2904   | 2 | 1139.01 | -13.08 |
| P04406 G3P_HUMAN Glycer aldehyde-3-phosphate dehydrogenase | 15 |                                             | YDDIK                               | 254 | 5  | 1  | 13.3   | y3                                                                          | 653.31  | 76.857  | 2371   | 1 | 653.31  | -5.98  |
| P04406 G3P_HUMAN Glycer aldehyde-3-phosphate dehydrogenase | 16 |                                             | VIISAPSADAPMFVMGVNHEKYDNSLK         | 118 | 27 | 7  | 29.45  | b3b21y6y12°y12y19y22                                                        | 2933.43 | 74.970  | 68214  | 4 | 734.11  | -8.66  |
| P04406 G3P_HUMAN Glycer aldehyde-3-phosphate dehydrogenase | 17 |                                             | AENGKLVINGNPITIFQER                 | 61  | 19 | 3  | 15.08  | b18y4y11                                                                    | 2113.13 | 114.920 | 18840  | 3 | 705.05  | -5.31  |
| P04406 G3P_HUMAN Glycer aldehyde-3-phosphate dehydrogenase | 18 | Carbamidomethyl+C(20)                       | LTGMAFRVPTANVSVVDLTCR               | 227 | 21 | 4  | 14.01  | b3°b3y4y8                                                                   | 2307.17 | 80.400  | 10205  | 3 | 769.73  | -9.21  |
| P04406 G3P_HUMAN Glycer aldehyde-3-phosphate dehydrogenase | 19 |                                             | LISWYDNEFGYSNRVVDLMAHMASK           | 309 | 25 | 3  | 22.99  | y4y5y15                                                                     | 2946.43 | 77.106  | 6653   | 5 | 590.09  | 11.60  |
| P04406 G3P_HUMAN Glycer aldehyde-3-phosphate dehydrogenase | 20 |                                             | AAFNSGKVDIVAINDPFIDLNYVMYMFQYDSTHGK | 20  | 35 | 5  | 10.96  | b4b7°b7y6°y6                                                                | 3983.90 | 119.656 | 6579   | 4 | 996.73  | 0.49   |

|                                                           |    |                                                                      |                                        |     |    |    |        |                                                       |         |         |        |   |         |        |
|-----------------------------------------------------------|----|----------------------------------------------------------------------|----------------------------------------|-----|----|----|--------|-------------------------------------------------------|---------|---------|--------|---|---------|--------|
| P04406 G3P_HUMAN Glyceraldehyde-3-phosphate dehydrogenase | 21 |                                                                      | IKWGDAGAEYVVESTGVFTTMEK                | 84  | 23 | 3  | 13.16  | b9y4y8                                                | 2518.22 | 128.840 | 2403   | 3 | 840.08  | 1.16   |
| P04406 G3P_HUMAN Glyceraldehyde-3-phosphate dehydrogenase | 22 | Carbamidomethyl+C(7);<br>Carbamidomethyl+C(11);<br>Phosphoryl STY(6) | IISNASCTTNCLAPLAK                      | 145 | 17 | 3  | 23.88  | y10y12_H3PO4 y12y14                                   | 1913.89 | 74.022  | 2320   | 3 | 638.64  | 9.38   |
| P04406 G3P_HUMAN Glyceraldehyde-3-phosphate dehydrogenase | 23 | Oxidation+M(12)                                                      | VIISAPSADAPMFVMGVNHEK                  | 118 | 21 | 8  | 38.9   | b8y6°y6y8*y8y9°y9y10                                  | 2229.08 | 37.801  | 359605 | 4 | 558.03  | -8.87  |
| P04406 G3P_HUMAN Glyceraldehyde-3-phosphate dehydrogenase | 24 |                                                                      | GALQNIIPASTG                           | 200 | 12 | 0  | 3.97   |                                                       | 1141.61 | 60.352  | 55240  | 2 | 571.31  | -6.95  |
| P04406 G3P_HUMAN Glyceraldehyde-3-phosphate dehydrogenase | 25 |                                                                      | EGLMTTVHAIATQK                         | 171 | 15 | 0  | 7.54   |                                                       | 1600.82 | 103.845 | 1881   | 2 | 800.92  | -7.47  |
| Q15404 RSU1_HUMAN Ras suppressor protein 1                | 1  |                                                                      | AENNPWVTPIADQFQLGVSHVFEYIR             | 212 | 26 | 16 | 117.08 | b4*b4b8y3y4°y4y5y6y8y10y12y18y19y20y22y26             | 3030.52 | 113.722 | 50715  | 3 | 1010.85 | 3.54   |
| Q15404 RSU1_HUMAN Ras suppressor protein 1                | 2  |                                                                      | NLEVLNFFNNQIEELPTQISSLQK               | 63  | 24 | 11 | 38.67  | b2*b2b3b4*b4b7*b7y4y5y9y24                            | 2818.46 | 109.256 | 18373  | 3 | 940.16  | 0.26   |
| Q15404 RSU1_HUMAN Ras suppressor protein 1                | 3  |                                                                      | GFGSLPALEVLDTYNNLSSENSLP<br>GNFFYLTTLR | 103 | 34 | 7  | 34.4   | b2b3b4b9y6y7y11                                       | 3775.96 | 134.583 | 3870   | 3 | 1259.32 | 9.18   |
| Q15404 RSU1_HUMAN Ras suppressor protein 1                | 4  |                                                                      | LTVLPELGNLDTLGQK                       | 191 | 17 | 3  | 16.48  | b4y12y14                                              | 1808.02 | 86.933  | 35016  | 2 | 904.51  | 2.70   |
| Q15404 RSU1_HUMAN Ras suppressor protein 1                | 5  |                                                                      | HLNLGMNR                               | 89  | 8  | 5  | 49.64  | b3*b3b6b7y4                                           | 954.47  | 46.161  | 12854  | 2 | 477.74  | -22.70 |
| Q15404 RSU1_HUMAN Ras suppressor protein 1                | 6  |                                                                      | LNTLPR                                 | 97  | 6  | 1  | 13.7   | y4                                                    | 713.43  | 31.946  | 7343   | 2 | 357.22  | -7.61  |
| Q15404 RSU1_HUMAN Ras suppressor protein 1                | 7  |                                                                      | NQPEVMSDR                              | 15  | 10 | 3  | 41.9   | b3b5b8                                                | 1190.53 | 40.409  | 2305   | 2 | 595.77  | 19.58  |
| Q15404 RSU1_HUMAN Ras suppressor protein 1                | 8  |                                                                      | SETYKYLYGR                             | 238 | 10 | 3  | 27.12  | b7y3y6                                                | 1279.64 | 42.930  | 4300   | 3 | 427.22  | 7.63   |
| Q15404 RSU1_HUMAN Ras suppressor protein 1                | 9  | Phosphoryl STY(15)                                                   | GISNMLDVNGLFTLSHITQLVLSH<br>NK         | 25  | 26 | 9  | 60.56  | b9*b9b11b12b13b14y4y15y21                             | 2931.48 | 106.054 | 149958 | 4 | 733.63  | 4.08   |
| Q9H4B7 TBB1_HUMAN Tubulin beta-1 chain                    | 1  |                                                                      | LGALFQPDSPVHVGNSGAGNNWAK               | 80  | 23 | 8  | 41.44  | b3b4b6b10y6y12y17y23                                  | 2387.16 | 74.932  | 193153 | 3 | 796.39  | 2.97   |
| Q9H4B7 TBB1_HUMAN Tubulin beta-1 chain                    | 2  |                                                                      | AVLVDLEPGTMD SIR                       | 62  | 15 | 8  | 59.02  | b3y4°y4y8y9y10y11y15                                  | 1615.84 | 75.073  | 192871 | 2 | 808.43  | 5.51   |
| Q9H4B7 TBB1_HUMAN Tubulin beta-1 chain                    | 3  |                                                                      | LAVNMVPPFR                             | 252 | 10 | 15 | 101.43 | b2b5*b5y1y2y3y4y5y6y7*y7y8y9*y9y10                    | 1143.63 | 72.994  | 161983 | 2 | 572.32  | -2.24  |
| Q9H4B7 TBB1_HUMAN Tubulin beta-1 chain                    | 4  |                                                                      | ALSVAELTQQMFDAR                        | 282 | 15 | 19 | 153.7  | b4°b4b11*b11b13b14°b14y2y3y4y5y6y7y8y10°y10y12y13y15  | 1679.84 | 92.602  | 142747 | 2 | 840.43  | 0.58   |
| Q9H4B7 TBB1_HUMAN Tubulin beta-1 chain                    | 5  |                                                                      | IMNSFSVMPSPK                           | 162 | 12 | 12 | 103.77 | b2b8y3y5°y5y7y8y9y10y11°y11y12                        | 1337.66 | 63.746  | 105051 | 2 | 669.33  | 0.82   |
| Q9H4B7 TBB1_HUMAN Tubulin beta-1 chain                    | 6  | Carbamidomethyl+C(4)                                                 | NSSCFVEWIPNNVK                         | 336 | 14 | 9  | 59.08  | b1°b1b9y5y8y9y11y12y14                                | 1693.81 | 75.749  | 91276  | 2 | 847.41  | 5.48   |
| Q9H4B7 TBB1_HUMAN Tubulin beta-1 chain                    | 7  |                                                                      | LHFFMPGFAPLTAQGSQQYR                   | 262 | 20 | 22 | 166.81 | b2b3b4b5b7b9b11b12y1y2y3*y3y4y5y6y7*y7y9y11y13*y13y15 | 2296.13 | 88.835  | 85694  | 3 | 766.05  | -2.45  |
| Q9H4B7 TBB1_HUMAN Tubulin beta-1 chain                    | 8  |                                                                      | LTTPTYGDLNHLVSLTMSGITSLR               | 216 | 25 | 18 | 120.77 | b2°b2b6b9b11°b11b14y3y4y5y7y8y9y10y12y14y22y25        | 2691.40 | 107.982 | 64582  | 3 | 897.81  | 0.27   |

|                                        |    |                                            |                                        |     |    |    |        |                                                                                                |         |         |        |   |         |        |
|----------------------------------------|----|--------------------------------------------|----------------------------------------|-----|----|----|--------|------------------------------------------------------------------------------------------------|---------|---------|--------|---|---------|--------|
| Q9H4B7 TBB1_HUMAN Tubulin beta-1 chain | 9  | Carbamidomethyl+C(6); Carbamidomethyl+C(8) | HESESCDCLQGFQIVHSLGGGTGS GMGTLMLNK     | 121 | 33 | 4  | 11.09  | b3y2y4y9                                                                                       | 3507.57 | 83.096  | 61489  | 4 | 877.65  | -0.56  |
| Q9H4B7 TBB1_HUMAN Tubulin beta-1 chain | 10 |                                            | EVDQQLLSVQTR                           | 324 | 12 | 6  | 44.53  | b6b8y5y6y10y12                                                                                 | 1415.76 | 53.087  | 54204  | 2 | 708.38  | 4.74   |
| Q9H4B7 TBB1_HUMAN Tubulin beta-1 chain | 11 |                                            | GASALQLER                              | 37  | 9  | 6  | 45.26  | b3b6y4*y4y7y9                                                                                  | 944.51  | 41.343  | 47643  | 2 | 472.76  | -1.16  |
| Q9H4B7 TBB1_HUMAN Tubulin beta-1 chain | 12 |                                            | GHYTEGAELIENVLEVVR                     | 103 | 18 | 5  | 24.66  | b3b9b10y1y2                                                                                    | 2028.03 | 100.018 | 22492  | 3 | 676.68  | -6.02  |
| Q9H4B7 TBB1_HUMAN Tubulin beta-1 chain | 13 |                                            | GLSMAATFIGNNTAIQEIFNR                  | 359 | 21 | 3  | 22.46  | b5y12y13                                                                                       | 2268.13 | 100.979 | 20246  | 3 | 756.72  | -4.84  |
| Q9H4B7 TBB1_HUMAN Tubulin beta-1 chain | 14 |                                            | ISVYYNEAYGR                            | 46  | 11 | 5  | 38.61  | b9b10*b10y7y10                                                                                 | 1334.61 | 40.317  | 164915 | 2 | 667.81  | -22.50 |
| Q9H4B7 TBB1_HUMAN Tubulin beta-1 chain | 15 |                                            | AFVHWYITSEGMDINEFGEAENNI HDLVSEYQQQDAK | 392 | 37 | 10 | 33.91  | b4b12b15b16*b16b23y4y9y12*y12                                                                  | 4362.00 | 88.821  | 7054   | 3 | 1454.67 | 14.66  |
| Q9H4B7 TBB1_HUMAN Tubulin beta-1 chain | 16 | Carbamidomethyl+C(6)                       | NTMAACDLR                              | 297 | 9  | 4  | 45.77  | b3b4b5y7                                                                                       | 1051.48 | 94.424  | 1587   | 1 | 1051.48 | 16.25  |
| Q9H4B7 TBB1_HUMAN Tubulin beta-1 chain | 17 | Carbamidomethyl+C(4)                       | VAVCDIPRGLSMAATFIGNNTAI QEIFNR         | 350 | 30 | 7  | 26.69  | b4b6b14b16y6*y6y11                                                                             | 3275.66 | 103.918 | 13585  | 3 | 1092.56 | -2.24  |
| Q9H4B7 TBB1_HUMAN Tubulin beta-1 chain | 18 |                                            | LTTPTYGDLNHLVSLTMSGITSL RFPQQLNADLR    | 216 | 35 | 5  | 12.95  | b6b17y8*y8y15                                                                                  | 3802.96 | 116.849 | 12353  | 4 | 951.50  | -4.11  |
| Q9H4B7 TBB1_HUMAN Tubulin beta-1 chain | 19 | Phosphoryl STY(14)                         | LTTPTYGDLNHLVSLTMSGITSL R              | 216 | 25 | 9  | 28.35  | b8*b8b11*b11b12b15*b15y13*y13                                                                  | 2771.36 | 90.114  | 4198   | 2 | 1386.19 | 1.76   |
| Q9H4B7 TBB1_HUMAN Tubulin beta-1 chain | 20 | Phosphoryl STY(8)                          | ALSVAELTQQMFDAR                        | 282 | 15 | 5  | 44.26  | b8y4y5y6y13                                                                                    | 1759.82 | 90.869  | 3590   | 2 | 880.41  | 10.54  |
| Q9H4B7 TBB1_HUMAN Tubulin beta-1 chain | 21 | Phosphoryl STY(12)                         | LHFFMPGFAPLTAQGSQQYR                   | 262 | 20 | 5  | 30.95  | b6b8y5y7y8                                                                                     | 2376.12 | 102.676 | 2778   | 2 | 1188.56 | 10.48  |
| Q9H4B7 TBB1_HUMAN Tubulin beta-1 chain | 22 |                                            | NSFSVMPSPK                             | 164 | 10 | 1  | 7.63   | b3                                                                                             | 1093.52 | 63.769  | 3431   | 2 | 547.26  | -12.50 |
| P12814 ACTN1_HUMAN Alpha-actinin-1     | 1  |                                            | VGWEQLLTIAR                            | 714 | 12 | 20 | 172.72 | b1b3b4b5*b5b6b7b8y1y2y3y4*y4y5y6y7y8*y8y9y12                                                   | 1386.77 | 98.342  | 323880 | 2 | 693.89  | -3.79  |
| P12814 ACTN1_HUMAN Alpha-actinin-1     | 2  |                                            | AIMTYVSSFYHAFSGAQK                     | 236 | 18 | 33 | 205.77 | b2b5*b5b6b8b14y1y2*y2y4*y4y5y6*y6y7y8*y8y9y10*y10y11*y11*y11y12*y12y13*y13y14*y14y15y16*y16y18 | 2007.95 | 90.892  | 169842 | 3 | 669.99  | -5.71  |
| P12814 ACTN1_HUMAN Alpha-actinin-1     | 3  |                                            | VLAVNQENEQLMEDYEK                      | 264 | 17 | 13 | 76.01  | b1b2b3b4b12*b12b14y4y6y9y13y14y17                                                              | 2051.98 | 61.993  | 108708 | 2 | 1026.49 | 10.47  |
| P12814 ACTN1_HUMAN Alpha-actinin-1     | 4  |                                            | VEQIAAIAQELNELDYDPSVNA R               | 450 | 25 | 23 | 157.45 | b2b3b4b6b7b14b19b23y3*y3y4*y4y5y6*y6y7y8y10*y10y12y14y22y25                                    | 2808.39 | 94.861  | 107677 | 3 | 936.80  | 8.35   |
| P12814 ACTN1_HUMAN Alpha-actinin-1     | 5  |                                            | TINEVENQILTR                           | 726 | 12 | 5  | 32.69  | b12y3y6y10y12                                                                                  | 1429.77 | 60.230  | 104115 | 2 | 715.39  | 6.40   |
| P12814 ACTN1_HUMAN Alpha-actinin-1     | 6  |                                            | LAILGIHNEVSK                           | 565 | 12 | 5  | 32.69  | b2y2y3y6y9                                                                                     | 1293.73 | 58.631  | 99311  | 3 | 431.92  | -13.78 |
| P12814 ACTN1_HUMAN Alpha-actinin-1     | 7  | Carbamidomethyl+C(2)                       | ICDQWDLGALTQK                          | 478 | 14 | 11 | 57.16  | b2b10b13*b13y2y3y6y9y12*y12y14                                                                 | 1661.77 | 70.303  | 83700  | 2 | 831.39  | -14.69 |
| P12814 ACTN1_HUMAN Alpha-actinin-1     | 8  |                                            | ALDFIASK                               | 95  | 8  | 9  | 64.7   | b3b4b5y2*y2y5y6*y6y8                                                                           | 864.48  | 55.656  | 81860  | 2 | 432.74  | -6.28  |
| P12814 ACTN1_HUMAN Alpha-actinin-1     | 9  |                                            | LASDLLEWIR                             | 281 | 10 | 7  | 61.51  | b4y2y3y4y8y9y10                                                                                | 1215.67 | 92.322  | 80803  | 2 | 608.34  | -4.62  |
| P12814 ACTN1_HUMAN Alpha-actinin-1     | 10 |                                            | LLETIDQLYLEYAK                         | 502 | 14 | 16 | 101.06 | b2b4*b4b7y2y3y4y5y6y9y10*y10y11*y11y12*y14                                                     | 1711.92 | 91.726  | 71800  | 2 | 856.47  | 4.78   |



|                                    |    |                       |                                       |     |    |    |       |                                    |         |         |        |   |         |        |
|------------------------------------|----|-----------------------|---------------------------------------|-----|----|----|-------|------------------------------------|---------|---------|--------|---|---------|--------|
| P12814 ACTN1_HUMAN Alpha-actinin-1 | 11 |                       | LLETIDQLYLEYAKR                       | 502 | 15 | 12 | 86.6  | b2b5y4y5°y5y6y7y10*y10y12y13y15    | 1868.00 | 86.139  | 55257  | 3 | 623.34  | -7.12  |
| P12814 ACTN1_HUMAN Alpha-actinin-1 | 12 |                       | QFGAQANVIGPWQTK                       | 633 | 16 | 9  | 27.92 | b7b11*b11b15°b15b16y2y7y16         | 1757.93 | 76.378  | 53979  | 2 | 879.47  | 0.63   |
| P12814 ACTN1_HUMAN Alpha-actinin-1 | 13 |                       | IVQTYHVN MAGTNPYTTITPQEIN GK          | 577 | 26 | 5  | 25.75 | b7b13y7y8y26                       | 2890.44 | 64.554  | 45195  | 3 | 964.15  | -0.34  |
| P12814 ACTN1_HUMAN Alpha-actinin-1 | 14 |                       | RDQALTEEHAR                           | 613 | 11 | 8  | 27.52 | b1b2b3b4y1y2y5y11                  | 1325.64 | 17.502  | 34872  | 3 | 442.55  | -14.64 |
| P12814 ACTN1_HUMAN Alpha-actinin-1 | 15 |                       | ATLPDADKER                            | 555 | 10 | 8  | 52.19 | b2y1y2y3y4y5y7y10                  | 1115.57 | 26.316  | 32812  | 2 | 558.29  | -1.86  |
| P12814 ACTN1_HUMAN Alpha-actinin-1 | 16 | Carbamidomethyl+C(10) | ELPPDQAEYCIAR                         | 850 | 13 | 6  | 28.31 | y6°y6y7y11°y11*y11                 | 1561.73 | 50.584  | 8052   | 2 | 781.37  | 0.47   |
| P12814 ACTN1_HUMAN Alpha-actinin-1 | 17 |                       | DQALTEEHAR                            | 614 | 10 | 6  | 52.19 | y2y5°y5y6y7y8                      | 1169.55 | 21.314  | 4090   | 2 | 585.28  | -2.61  |
| P12814 ACTN1_HUMAN Alpha-actinin-1 | 18 |                       | HTNYTMEHIR                            | 704 | 10 | 4  | 34.11 | b2y6y7y9                           | 1301.59 | 37.675  | 3792   | 2 | 651.30  | -9.66  |
| P12814 ACTN1_HUMAN Alpha-actinin-1 | 19 |                       | HRPELDYGK                             | 185 | 10 | 5  | 27.12 | b5°b5b8°b8y9                       | 1227.64 | 62.897  | 140585 | 2 | 614.32  | -6.66  |
| P12814 ACTN1_HUMAN Alpha-actinin-1 | 20 |                       | MLDAEDIVGTARPDEK                      | 220 | 16 | 5  | 28.59 | b14°b14y5y11y12                    | 1759.85 | 60.476  | 134745 | 3 | 587.29  | -3.47  |
| P12814 ACTN1_HUMAN Alpha-actinin-1 | 21 | Carbamidomethyl+C(2)  | ACLISLGYDIGNDPQGEAEFAR                | 772 | 22 | 3  | 13.56 | b6b9y7                             | 2396.17 | 81.825  | 21246  | 3 | 799.40  | 22.01  |
| P12814 ACTN1_HUMAN Alpha-actinin-1 | 22 |                       | ATLPDADK                              | 555 | 8  | 3  | 36.33 | b7y4y7                             | 830.42  | 28.857  | 12720  | 2 | 415.71  | -11.25 |
| P12814 ACTN1_HUMAN Alpha-actinin-1 | 23 |                       | MAPYTGPDSPVPGALDYMSFSTAL YGESDL       | 863 | 29 | 10 | 62.89 | b4b6b10b11y4y5y7y9y10y14           | 3055.33 | 98.330  | 11301  | 3 | 1019.11 | -9.43  |
| P12814 ACTN1_HUMAN Alpha-actinin-1 | 24 |                       | YLDIPK                                | 214 | 6  | 1  | 13.7  | b3                                 | 748.43  | 65.108  | 9632   | 1 | 748.43  | 3.51   |
| P12814 ACTN1_HUMAN Alpha-actinin-1 | 25 |                       | AAPFNWMEGAMEDLQDTFIVH TIEEIQLTTAHEQFK | 517 | 38 | 3  | 10.86 | b7b11y4                            | 4362.01 | 136.291 | 9472   | 4 | 1091.26 | -8.96  |
| P12814 ACTN1_HUMAN Alpha-actinin-1 | 26 | Carbamidomethyl+C(11) | MVSDINNAWGCLEQVEK                     | 359 | 17 | 12 | 81.24 | b3b4b7b8b13y5°y5*y5y7y10°y10y14    | 1992.92 | 96.309  | 8248   | 2 | 996.97  | 3.86   |
| P12814 ACTN1_HUMAN Alpha-actinin-1 | 27 |                       | AGTQIENIEEDFR                         | 47  | 13 | 7  | 34.72 | b5b11y7°y7*y7y8°y8                 | 1521.68 | 46.039  | 5425   | 2 | 761.35  | -22.46 |
| P12814 ACTN1_HUMAN Alpha-actinin-1 | 28 |                       | DDPLTNLNTAFDVAEK                      | 198 | 16 | 4  | 25.03 | b5b8b14*b14                        | 1762.86 | 52.950  | 2725   | 2 | 881.93  | 4.36   |
| P12814 ACTN1_HUMAN Alpha-actinin-1 | 29 |                       | TAPYK                                 | 157 | 5  | 1  | 13.3  | b4                                 | 579.31  | 109.410 | 2240   | 1 | 579.31  | -2.21  |
| P12814 ACTN1_HUMAN Alpha-actinin-1 | 30 |                       | VPENTMHAMQQK                          | 300 | 12 | 4  | 40.55 | b6b7b8y9                           | 1413.68 | 96.117  | 2021   | 2 | 707.34  | 14.94  |
| P12814 ACTN1_HUMAN Alpha-actinin-1 | 31 |                       | QQHNER                                | 624 | 6  | 1  | 13.7  | b4                                 | 811.37  | 77.474  | 1512   | 1 | 811.37  | -14.82 |
| P12814 ACTN1_HUMAN Alpha-actinin-1 | 32 |                       | VLAVNQENEQLMEDYEKLASDLL EWIR          | 264 | 27 | 3  | 21.99 | b12y3y4                            | 3248.59 | 86.118  | 169995 | 4 | 812.90  | -8.57  |
| P12814 ACTN1_HUMAN Alpha-actinin-1 | 33 |                       | IVQTYHVN MAGTNPYTTITPQEIN GKWDHVR     | 577 | 31 | 11 | 44.67 | b10b13b14y3y7y10*y10y12°y12y13°y13 | 3583.74 | 68.145  | 105053 | 5 | 717.55  | -9.40  |
| P12814 ACTN1_HUMAN Alpha-actinin-1 | 34 |                       | TIPWLENR VPENTMHAMQQK                 | 292 | 20 | 3  | 14.51 | b4y4y11                            | 2423.17 | 68.408  | 74537  | 4 | 606.55  | -9.87  |
| P12814 ACTN1_HUMAN Alpha-actinin-1 | 35 |                       | IDQLEGDHQLIQEALIFDNKHTNY TMEHIR       | 684 | 30 | 4  | 24.92 | b10b11y3y9                         | 3621.73 | 76.661  | 34500  | 5 | 725.15  | -12.07 |
| P12814 ACTN1_HUMAN Alpha-actinin-1 | 36 | Carbamidomethyl+C(2)  | ICKVLAVNQENEQLMEDYEK                  | 261 | 20 | 3  | 14.51 | b12y4y7                            | 2453.19 | 120.532 | 13130  | 3 | 818.40  | 9.85   |
| P12814 ACTN1_HUMAN Alpha-actinin-1 | 37 |                       | RDQALTEEHAR                           | 613 | 11 | 3  | 27.52 | b4y5y6                             | 1325.67 | 54.407  | 7722   | 2 | 663.34  | 13.81  |
| P12814 ACTN1_HUMAN Alpha-actinin-1 | 38 |                       | LRLSNRPAFMPSEGR                       | 344 | 15 | 6  | 41.74 | y6y8y11*y11y13°y13                 | 1730.89 | 97.295  | 5929   | 2 | 865.95  | -12.41 |
| P12814 ACTN1_HUMAN Alpha-actinin-1 | 39 |                       | ILAGDKNYITMDEL R                      | 834 | 15 | 9  | 86.09 | b11b12y4y5°y5y6y7y11y13            | 1751.87 | 103.939 | 5510   | 2 | 876.44  | -14.42 |

|                                                                         |    |                       |                                      |     |    |    |        |                                                             |         |         |        |   |         |        |
|-------------------------------------------------------------------------|----|-----------------------|--------------------------------------|-----|----|----|--------|-------------------------------------------------------------|---------|---------|--------|---|---------|--------|
| P12814 ACTN1_HUMAN Alpha-actinin-1                                      | 40 |                       | ASFNHFDRDHSGLGPEEFK                  | 752 | 20 | 5  | 25.47  | b4b5b13y13*y13                                              | 2291.08 | 99.396  | 4617   | 3 | 764.36  | 13.64  |
| P12814 ACTN1_HUMAN Alpha-actinin-1                                      | 41 |                       | KDDPLTNLNTAFDVAEK                    | 197 | 17 | 3  | 16.48  | b4b11y12                                                    | 1890.92 | 65.965  | 2262   | 2 | 945.96  | -12.01 |
| P12814 ACTN1_HUMAN Alpha-actinin-1                                      | 42 |                       | KAGTQIENIEEDFR                       | 46  | 14 | 4  | 19.47  | b12*b12y3y13                                                | 1649.79 | 86.218  | 2216   | 2 | 825.40  | -12.50 |
| P12814 ACTN1_HUMAN Alpha-actinin-1                                      | 43 |                       | DAKGISQEQMNEFR                       | 738 | 14 | 3  | 24.91  | b9y10y11                                                    | 1652.79 | 48.384  | 1666   | 2 | 826.90  | 10.78  |
| P12814 ACTN1_HUMAN Alpha-actinin-1                                      | 44 | Phosphoryl STY(8)     | ISIEMHGTLEDQLSHLR                    | 655 | 17 | 7  | 39.4   | y7*y7*y7y9y10_HPO3<br>y11_HPO3 y10*y10y11                   | 2058.96 | 104.023 | 15643  | 3 | 686.99  | 0.36   |
| P12814 ACTN1_HUMAN Alpha-actinin-1                                      | 45 |                       | LPDADKER                             | 557 | 8  | 0  | 1.98   |                                                             | 943.48  | 26.330  | 18800  | 2 | 472.24  | -5.30  |
| P12814 ACTN1_HUMAN Alpha-actinin-1                                      | 46 |                       | PDADKER                              | 558 | 7  | 1  | 8.3    | b4                                                          | 830.40  | 26.337  | 12383  | 2 | 415.70  | -4.56  |
| P12814 ACTN1_HUMAN Alpha-actinin-1                                      | 47 |                       | TLPDADKER                            | 556 | 9  | 0  | 1.98   |                                                             | 1044.53 | 26.326  | 12162  | 2 | 522.77  | -0.70  |
| P12814 ACTN1_HUMAN Alpha-actinin-1                                      | 48 |                       | ILGIHNEVSK                           | 567 | 10 | 0  | 2.78   |                                                             | 1109.64 | 58.596  | 8826   | 2 | 555.32  | 4.73   |
| P12814 ACTN1_HUMAN Alpha-actinin-1                                      | 49 |                       | AILGIHNEVSK                          | 566 | 11 | 1  | 7.63   | b4                                                          | 1180.66 | 58.642  | 5823   | 2 | 590.83  | -6.93  |
| P12814 ACTN1_HUMAN Alpha-actinin-1                                      | 50 |                       | LTEEHAR                              | 617 | 7  | 0  | 2.38   |                                                             | 855.43  | 17.565  | 2665   | 2 | 428.22  | 1.07   |
| P12814 ACTN1_HUMAN Alpha-actinin-1                                      | 51 | Carbamidomethyl+C(2)  | ICDQWDNLGALTQK                       | 478 | 14 | 0  | 3.57   |                                                             | 1643.78 | 70.325  | 16097  | 3 | 548.60  | 3.04   |
| P12814 ACTN1_HUMAN Alpha-actinin-1                                      | 52 |                       | ATLPDADKER                           | 555 | 10 | 0  | 1.98   |                                                             | 1097.54 | 26.330  | 2144   | 3 | 366.52  | -14.57 |
| Q9H299 SH3L3_HUMAN SH3 domain-binding glutamic acid-rich-like protein 3 | 1  |                       | VYSTSVTGSR                           | 5   | 10 | 7  | 55.2   | b2b10y3y6y8y9y10                                            | 1056.53 | 28.353  | 71399  | 2 | 528.77  | -0.58  |
| Q9H299 SH3L3_HUMAN SH3 domain-binding glutamic acid-rich-like protein 3 | 2  |                       | IQYQLVDISQDNALR                      | 32  | 15 | 12 | 103.37 | b2b4*b4b5y4y5y6*y6y7<br>y8y10y13                            | 1775.92 | 70.630  | 65294  | 2 | 888.46  | -7.56  |
| Q9H299 SH3L3_HUMAN SH3 domain-binding glutamic acid-rich-like protein 3 | 3  | Carbamidomethyl+C(13) | ATPPQIVNGDQYCGDYELFVEAV<br>EQNTLQEFK | 58  | 33 | 20 | 114.56 | b2b6b8b9b11*b11*b11b<br>23y1y2y3y4y5y6y9*y9y<br>10y11y12y33 | 3815.84 | 117.938 | 21763  | 3 | 1272.62 | 7.17   |
| Q9H299 SH3L3_HUMAN SH3 domain-binding glutamic acid-rich-like protein 3 | 4  |                       | RIQYQLVDISQDNALR                     | 31  | 16 | 5  | 28.59  | b14y9y13y14*y14                                             | 1932.01 | 76.579  | 1995   | 3 | 644.68  | -8.40  |
| Q9H299 SH3L3_HUMAN SH3 domain-binding glutamic acid-rich-like protein 3 | 5  | Phosphoryl STY(9)     | IQYQLVDISQDNALR                      | 32  | 15 | 6  | 26.06  | b7b9y8y12*y12*y12                                           | 1855.88 | 94.970  | 1793   | 2 | 928.44  | -2.57  |
| P68363 TBA1B_HUMAN Tubulin alpha-1B chain                               | 1  |                       | QLFHPEQLITGKEDAANNYAR                | 84  | 21 | 8  | 53.21  | y3y5y6y9y10y12y21*y2<br>1                                   | 2415.18 | 62.326  | 354393 | 4 | 604.55  | -8.79  |
| P68363 TBA1B_HUMAN Tubulin alpha-1B chain                               | 2  |                       | VGINYQPPTVVPGLDLAK                   | 352 | 18 | 15 | 69.5   | b1b5*b5b6*b6b10b11*b<br>11y1y2y3y7y8y12y18                  | 1825.00 | 66.011  | 249834 | 2 | 913.00  | 5.75   |
| P68363 TBA1B_HUMAN Tubulin alpha-1B chain                               | 3  |                       | AVFVDLEPTVIDEVR                      | 64  | 15 | 14 | 124.08 | b3b5b7b14y2y3y4*y4y5<br>y8y10y11y13y15                      | 1701.91 | 84.661  | 166039 | 2 | 851.46  | 3.44   |
| P68363 TBA1B_HUMAN Tubulin alpha-1B chain                               | 4  | Carbamidomethyl+C(8)  | SIQFVDWCPTGFK                        | 339 | 13 | 19 | 149.02 | b2b3*b3b4b5*b5*b5b6*<br>b6b12*b12y3y4y5y6y7y<br>9y10y13     | 1584.76 | 83.082  | 143941 | 2 | 792.88  | 5.47   |
| P68363 TBA1B_HUMAN Tubulin alpha-1B chain                               | 5  |                       | NLDIERPTYTNLNR                       | 215 | 14 | 11 | 40.18  | b2*b2b3b5*b5y7y10*y1<br>0y12*y12y14                         | 1718.87 | 52.991  | 135862 | 3 | 573.63  | -8.45  |
| P68363 TBA1B_HUMAN Tubulin alpha-1B chain                               | 6  |                       | IHFPLATYAPVISA EK                    | 264 | 16 | 5  | 17.33  | b2b3b8y2y4                                                  | 1756.94 | 78.557  | 95386  | 3 | 586.32  | -12.65 |

|                                           |    |                                                                          |                                      |     |    |    |        |                                                                      |         |         |        |   |         |        |
|-------------------------------------------|----|--------------------------------------------------------------------------|--------------------------------------|-----|----|----|--------|----------------------------------------------------------------------|---------|---------|--------|---|---------|--------|
| P68363 TBA1B_HUMAN Tubulin alpha-1B chain | 7  |                                                                          | EDMAALEK                             | 422 | 8  | 7  | 54.41  | y1y2y3y4y5y7y8                                                       | 906.42  | 36.796  | 59905  | 2 | 453.72  | 0.54   |
| P68363 TBA1B_HUMAN Tubulin alpha-1B chain | 8  | Carbamidomethyl+C(15)                                                    | AYHEQLSVAEITNACFEPANQMV<br>K         | 280 | 24 | 4  | 28.15  | y4y7y9y13                                                            | 2750.32 | 73.693  | 53120  | 3 | 917.44  | 9.94   |
| P68363 TBA1B_HUMAN Tubulin alpha-1B chain | 9  |                                                                          | LSVDYGKK                             | 156 | 8  | 6  | 54.41  | b2y3y4y5y7y8                                                         | 909.50  | 29.936  | 32828  | 2 | 455.25  | -9.13  |
| P68363 TBA1B_HUMAN Tubulin alpha-1B chain | 10 |                                                                          | FDGALNVDLTFEQTNLVPYPR                | 243 | 21 | 13 | 76.54  | b2b3b4b17y2y3y4y5y6y<br>11*y11y14y21                                 | 2409.23 | 95.114  | 30203  | 2 | 1205.12 | 7.40   |
| P68363 TBA1B_HUMAN Tubulin alpha-1B chain | 11 |                                                                          | LISQIVSSITASLR                       | 229 | 14 | 4  | 27.84  | b4b6y4y8                                                             | 1487.89 | 100.447 | 13968  | 2 | 744.45  | 5.17   |
| P02679 FIBG_HUMAN Fibrinogen gamma chain  | 1  |                                                                          | AIQLTYNPDESSKPNMIDAATLK              | 88  | 23 | 23 | 182.14 | b2b3b4b5b6*b6*b6b7b1<br>2*b12y2y3y4y5y10y14y<br>16y17y18y19y20y21y23 | 2520.27 | 66.822  | 299028 | 3 | 840.76  | 0.78   |
| P02679 FIBG_HUMAN Fibrinogen gamma chain  | 2  | Carbamidomethyl+C(8);<br>Carbamidomethyl+C(12);<br>Carbamidomethyl+C(26) | VAQLEAQCQEPCKDTVQIHDITG<br>KDCQDIANK | 153 | 32 | 17 | 99.84  | b1b3b16y2y4y8y9*y9y1<br>0y13y14y19y22y27y28y<br>29y32                | 3712.70 | 50.321  | 265243 | 5 | 743.34  | -11.11 |
| P02679 FIBG_HUMAN Fibrinogen gamma chain  | 3  |                                                                          | EGFGHLSPTGTTEFWLGNEK                 | 238 | 20 | 15 | 77.54  | b2*b2b6*b6b7b8b14*b1<br>4y3y4y8y13*y13y14y20                         | 2207.05 | 77.471  | 206407 | 3 | 736.36  | 6.42   |
| P02679 FIBG_HUMAN Fibrinogen gamma chain  | 4  |                                                                          | VELEDWNGR                            | 273 | 9  | 9  | 75.39  | b7y3*y3y4y5*y5y7y8y9                                                 | 1117.53 | 52.433  | 156239 | 2 | 559.27  | 2.95   |
| P02679 FIBG_HUMAN Fibrinogen gamma chain  | 5  |                                                                          | ASTPNGYDNGIHWATWK                    | 382 | 17 | 6  | 23.17  | b1b4b12y4y10y17                                                      | 1893.93 | 81.378  | 134094 | 2 | 947.47  | 7.35   |
| P02679 FIBG_HUMAN Fibrinogen gamma chain  | 6  | Carbamidomethyl+C(5);<br>Carbamidomethyl+C(9)                            | FGSYCPTTCGIADFLSTYQTK                | 40  | 21 | 20 | 146.2  | b2b3*b3b5b15y2y3*y3y<br>4y5y6y7y8y9*y9y10y12<br>y13y16y21            | 2417.10 | 88.944  | 109018 | 2 | 1209.05 | 8.18   |
| P02679 FIBG_HUMAN Fibrinogen gamma chain  | 7  |                                                                          | QSGLYFIKPLK                          | 188 | 11 | 7  | 53.34  | b5y1y2y3y4y5y7                                                       | 1293.74 | 65.548  | 104818 | 3 | 431.92  | -13.21 |
| P02679 FIBG_HUMAN Fibrinogen gamma chain  | 8  |                                                                          | YLQEIYNSNNQK                         | 134 | 12 | 12 | 76.88  | b2b3b4b10b12y7y8y9y1<br>0*y10*y10y12                                 | 1513.73 | 44.882  | 100445 | 2 | 757.37  | 2.26   |
| P02679 FIBG_HUMAN Fibrinogen gamma chain  | 9  | Carbamidomethyl+C(3);<br>Carbamidomethyl+C(4)                            | DNCCILDER                            | 31  | 9  | 6  | 38.49  | y1y2y3y4y5y9                                                         | 1194.49 | 44.973  | 93289  | 2 | 597.75  | 2.04   |
| P02679 FIBG_HUMAN Fibrinogen gamma chain  | 10 |                                                                          | IHLISTQSAIPYALR                      | 258 | 15 | 7  | 43.46  | b2b3b4y5y11y13y15                                                    | 1682.94 | 70.981  | 76279  | 3 | 561.65  | -11.24 |
| P02679 FIBG_HUMAN Fibrinogen gamma chain  | 11 |                                                                          | LTIGEGQQHHLGGAK                      | 417 | 15 | 7  | 59.02  | b10y5y6y7y12y13y15                                                   | 1545.80 | 33.019  | 63575  | 3 | 515.94  | -5.84  |
| P02679 FIBG_HUMAN Fibrinogen gamma chain  | 12 |                                                                          | QVRPEHPAETEDSLYPEDDL                 | 432 | 21 | 9  | 30.23  | b2*b2b5b10*b10b11*b1<br>1b13*b13                                     | 2503.13 | 92.925  | 25836  | 4 | 626.54  | 0.49   |
| P02679 FIBG_HUMAN Fibrinogen gamma chain  | 13 |                                                                          | YEASILTHDSSIR                        | 121 | 13 | 4  | 25.6   | b5b13y5y6                                                            | 1491.75 | 52.952  | 9387   | 2 | 746.38  | 5.81   |
| P02679 FIBG_HUMAN Fibrinogen gamma chain  | 14 |                                                                          | FFTSHNGMQFSTWDNDNDK                  | 328 | 19 | 3  | 15.08  | b6y9y11                                                              | 2290.94 | 55.047  | 116478 | 3 | 764.32  | -0.64  |
| P02679 FIBG_HUMAN Fibrinogen gamma chain  | 15 | Carbamidomethyl+C(8);<br>Carbamidomethyl+C(12)                           | VAQLEAQCQEPCK                        | 153 | 13 | 4  | 25.6   | b7y4y5*y5                                                            | 1560.73 | 91.586  | 102236 | 3 | 520.92  | 12.20  |
| P02679 FIBG_HUMAN Fibrinogen gamma chain  | 16 |                                                                          | NWIQYK                               | 232 | 6  | 3  | 27.01  | b3*b3y4                                                              | 851.43  | 49.926  | 50901  | 2 | 426.22  | -9.46  |
| P02679 FIBG_HUMAN Fibrinogen gamma chain  | 17 |                                                                          | DLQSLEDILHQVENK                      | 64  | 15 | 3  | 18.32  | b14y8y12                                                             | 1780.91 | 106.814 | 27087  | 2 | 890.96  | 3.91   |
| P02679 FIBG_HUMAN Fibrinogen gamma chain  | 18 |                                                                          | LDGSVDFK                             | 223 | 8  | 3  | 33.32  | b6y6y7                                                               | 880.43  | 93.550  | 6359   | 1 | 880.43  | -16.01 |
| P02679 FIBG_HUMAN Fibrinogen gamma chain  | 19 |                                                                          | TSTADYAMFK                           | 282 | 10 | 3  | 27.12  | b5b9y5                                                               | 1134.52 | 47.767  | 6237   | 2 | 567.76  | 1.94   |

|                                                        |    |                                                |                                     |     |    |    |       |                               |         |         |        |   |         |        |
|--------------------------------------------------------|----|------------------------------------------------|-------------------------------------|-----|----|----|-------|-------------------------------|---------|---------|--------|---|---------|--------|
| P02679 FIBG_HUMAN Fibrinogen gamma chain               | 20 |                                                | NWQYKEGFGHLSPTGTTEFWLG<br>NEK       | 232 | 26 | 4  | 12.23 | b12y3°y3y13                   | 3039.48 | 108.488 | 207216 | 4 | 760.63  | 5.46   |
| P02679 FIBG_HUMAN Fibrinogen gamma chain               | 21 | Carbamidomethyl+C(8);<br>Carbamidomethyl+C(12) | VAQLEAQCQEPCKDVTQIHDITG<br>K        | 153 | 24 | 3  | 19.12 | y3y14y19                      | 2768.32 | 51.060  | 121527 | 4 | 692.84  | -5.20  |
| P02679 FIBG_HUMAN Fibrinogen gamma chain               | 22 |                                                | VGPEADKYR                           | 292 | 9  | 10 | 88.7  | b8y3y4°y4y5y6°y6y7°y7<br>y8   | 1034.53 | 24.175  | 41250  | 2 | 517.77  | 1.89   |
| P02679 FIBG_HUMAN Fibrinogen gamma chain               | 23 |                                                | ASTPNGYDNGIHWATWKTR                 | 382 | 19 | 5  | 33.67 | b7b11b12b15y3                 | 2151.06 | 51.680  | 6121   | 5 | 431.02  | -1.25  |
| P02679 FIBG_HUMAN Fibrinogen gamma chain               | 24 | Phosphoryl STY(4)                              | DLQSLEDILHQVENK                     | 64  | 15 | 3  | 26.4  | y4y10y12_H3PO4 y12            | 1860.88 | 68.614  | 11786  | 3 | 620.97  | 10.89  |
| P02679 FIBG_HUMAN Fibrinogen gamma chain               | 25 | Phosphoryl STY(14)                             | QVRPEHPAETEDYDSLYPEDDL              | 432 | 21 | 3  | 22.46 | b12_H3PO4 b12b13y7            | 2583.12 | 88.800  | 9218   | 4 | 646.53  | 12.85  |
| P02679 FIBG_HUMAN Fibrinogen gamma chain               | 26 | Phosphoryl STY()                               | AIQLTYNPDESSKPNMIDAATLK             | 88  | 23 | 3  | 23.25 | b3b4b7                        | 2600.26 | 120.220 | 4841   | 3 | 867.42  | 13.33  |
| P02679 FIBG_HUMAN Fibrinogen gamma chain               | 27 | Carbamidomethyl+C(13);<br>Phosphoryl STY(9)    | DTVQIHDITGKDCQDIANK                 | 166 | 19 | 4  | 15.08 | b8y9°y9y12                    | 2251.02 | 59.994  | 4262   | 2 | 1126.02 | 11.82  |
| P02679 FIBG_HUMAN Fibrinogen gamma chain               | 28 | Oxidation+M(16)                                | AIQLTYNPDESSKPNMIDAATLK             | 88  | 23 | 5  | 26.72 | b10b13y14y15*y15              | 2536.23 | 100.344 | 126203 | 3 | 846.08  | -11.17 |
| P02679 FIBG_HUMAN Fibrinogen gamma chain               | 29 |                                                | TIGEGQQHHLGGAK                      | 418 | 14 | 0  | 3.97  |                               | 1432.72 | 33.016  | 22257  | 3 | 478.25  | -3.75  |
| P02679 FIBG_HUMAN Fibrinogen gamma chain               | 30 |                                                | GEGQQHHLGGAK                        | 420 | 12 | 1  | 7.27  | b4                            | 1218.60 | 33.089  | 20550  | 2 | 609.80  | 4.21   |
| P02679 FIBG_HUMAN Fibrinogen gamma chain               | 31 |                                                | IGEGQQHHLGGAK                       | 419 | 13 | 1  | 7.27  | b12                           | 1331.67 | 33.041  | 18905  | 3 | 444.56  | -10.63 |
| P02679 FIBG_HUMAN Fibrinogen gamma chain               | 32 |                                                | QSGLYFIKPLK                         | 188 | 11 | 0  | 2.38  |                               | 1276.72 | 65.550  | 15765  | 3 | 426.25  | -1.53  |
| P02679 FIBG_HUMAN Fibrinogen gamma chain               | 33 |                                                | LTIGEGQQHHLGGAK                     | 417 | 15 | 0  | 3.97  |                               | 1527.78 | 33.071  | 8917   | 4 | 382.70  | -14.86 |
| P19105 MLRC3_HUMAN Myosin regulatory light chain MRLC3 | 1  |                                                | LNGTDPEDVIR                         | 92  | 11 | 7  | 68.9  | y1y3y4y6y8y9y11               | 1228.62 | 49.138  | 149253 | 2 | 614.81  | -0.89  |
| P19105 MLRC3_HUMAN Myosin regulatory light chain MRLC3 | 2  |                                                | GNFNIEFTR                           | 150 | 10 | 10 | 74.03 | b2*b2b3b9y4°y4y5y7y8<br>y10   | 1260.60 | 67.453  | 103940 | 2 | 630.81  | 3.20   |
| P19105 MLRC3_HUMAN Myosin regulatory light chain MRLC3 | 3  |                                                | ATSNVFAMFDQSQIQEFK                  | 16  | 18 | 8  | 40.47 | b4b5y2y3y4*y4y10y18           | 2091.00 | 90.349  | 96968  | 2 | 1046.00 | 6.54   |
| P19105 MLRC3_HUMAN Myosin regulatory light chain MRLC3 | 4  |                                                | FTDEEVDLYR                          | 132 | 11 | 7  | 68.9  | y3y5y7y8y9y10*y11             | 1415.64 | 59.765  | 64287  | 2 | 708.33  | 7.76   |
| P19105 MLRC3_HUMAN Myosin regulatory light chain MRLC3 | 5  |                                                | ELLTMGDR                            | 123 | 9  | 8  | 68.11 | b9y3y4°y4y5y6y7y9             | 1035.51 | 49.250  | 34474  | 2 | 518.26  | -4.83  |
| P19105 MLRC3_HUMAN Myosin regulatory light chain MRLC3 | 6  |                                                | ATSNVFAMFDQSQIQEFKEAFNMI<br>DQNR    | 16  | 28 | 9  | 43.36 | b6b8b15°b15b16y9y13y<br>18y26 | 3309.49 | 81.577  | 24352  | 3 | 1103.83 | -13.50 |
| P19105 MLRC3_HUMAN Myosin regulatory light chain MRLC3 | 7  | Carbamidomethyl+C(5)                           | NAFACFDEEATGTIQEDYLRELLT<br>TMGDR   | 103 | 29 | 8  | 30.55 | b2b3b4*b4y3y5y10y29           | 3366.50 | 102.858 | 4904   | 3 | 1122.84 | -6.89  |
| P19105 MLRC3_HUMAN Myosin regulatory light chain MRLC3 | 8  |                                                | NPTDEYLDAMNNEAPGPNFTMF<br>LTMFGEK   | 62  | 30 | 5  | 17.35 | y4y10y12°y12*y12              | 3424.56 | 119.653 | 11162  | 5 | 685.72  | 11.69  |
| P19105 MLRC3_HUMAN Myosin regulatory light chain MRLC3 | 9  |                                                | EDLHDMLASLGK                        | 50  | 12 | 3  | 29.68 | b3b4b7                        | 1328.65 | 54.338  | 4566   | 2 | 664.83  | 0.09   |
| P19105 MLRC3_HUMAN Myosin regulatory light chain MRLC3 | 10 |                                                | KGFNIEFTR                           | 149 | 11 | 4  | 35.6  | b7b10y4y10                    | 1388.71 | 57.120  | 14734  | 2 | 694.86  | 8.88   |
| P19105 MLRC3_HUMAN Myosin regulatory light chain MRLC3 | 11 | Carbamidomethyl+C(16)                          | LNGTDPEDVIRNAFACFDEEATGT<br>IQEDYLR | 92  | 31 | 5  | 16.32 | b4b11b17y5°y5                 | 3559.66 | 81.530  | 2825   | 3 | 1187.22 | 8.02   |
| P19105 MLRC3_HUMAN Myosin regulatory light chain MRLC3 | 12 |                                                | ELLTMGDRFTDEEVDLYR                  | 123 | 20 | 5  | 28.12 | b7b10y10y11°y11               | 2432.15 | 96.168  | 2029   | 2 | 1216.58 | 7.83   |
| O14950 MLRC2_HUMAN Myosin regulatory light chain MRLC2 | 1  |                                                | LNGTDPEDVIR                         | 93  | 11 | 7  | 68.9  | y1y3y4y6y8y9y11               | 1228.62 | 49.138  | 149253 | 2 | 614.81  | -0.89  |
| O14950 MLRC2_HUMAN Myosin regulatory light chain MRLC2 | 2  |                                                | GNFNIEFTR                           | 151 | 10 | 10 | 74.03 | b2*b2b3b9y4°y4y5y7y8<br>y10   | 1260.60 | 67.453  | 103940 | 2 | 630.81  | 3.20   |

|                                                         |    |                                         |                                     |     |    |    |        |                                          |         |         |        |   |         |        |
|---------------------------------------------------------|----|-----------------------------------------|-------------------------------------|-----|----|----|--------|------------------------------------------|---------|---------|--------|---|---------|--------|
| [O14950]MRLC2_HUMAN Myosin regulatory light chain MRLC2 | 3  |                                         | ATSNVFAMFDQSQIQEFK                  | 17  | 18 | 8  | 40.47  | b4b5y2y3y4*y4y10y18                      | 2091.00 | 90.349  | 96968  | 2 | 1046.00 | 6.54   |
| [O14950]MRLC2_HUMAN Myosin regulatory light chain MRLC2 | 4  |                                         | FTDEEVDLYR                          | 133 | 11 | 7  | 68.9   | y3y5y7y8y9y10*y11                        | 1415.64 | 59.765  | 64287  | 2 | 708.33  | 7.76   |
| [O14950]MRLC2_HUMAN Myosin regulatory light chain MRLC2 | 5  |                                         | ELLTTMGDR                           | 124 | 9  | 8  | 68.11  | b9y3y4*y4y5y6y7y9                        | 1035.51 | 49.250  | 34474  | 2 | 518.26  | -4.83  |
| [O14950]MRLC2_HUMAN Myosin regulatory light chain MRLC2 | 6  |                                         | ATSNVFAMFDQSQIQEFKEAFNMI DQNR       | 17  | 28 | 9  | 43.36  | b6b8b15*b15b16y9y13y18y26                | 3309.49 | 81.577  | 24352  | 3 | 1103.83 | -13.50 |
| [O14950]MRLC2_HUMAN Myosin regulatory light chain MRLC2 | 7  | Carbamidomethyl+C(5)                    | NAFACFDEEATGTIQEDYLRELLT TMGDR      | 104 | 29 | 8  | 30.55  | b2b3b4*b4y3y5y10y29                      | 3366.50 | 102.858 | 4904   | 3 | 1122.84 | -6.89  |
| [O14950]MRLC2_HUMAN Myosin regulatory light chain MRLC2 | 8  | Oxidation+M()                           | ATSNVFAMFDQSQIQEFK                  | 17  | 18 | 3  | 22.89  | b6b9b13                                  | 2106.97 | 63.750  | 45637  | 3 | 702.99  | -6.72  |
| [O14950]MRLC2_HUMAN Myosin regulatory light chain MRLC2 | 9  | Oxidation+M()                           | ATSNVFAMFDQSQIQEFKEAFNMI DQNRDGFIDK | 17  | 34 | 5  | 21.63  | b3b4b9*b9y4                              | 4000.85 | 101.942 | 2740   | 3 | 1334.29 | 1.71   |
| [P60660]MYL6_HUMAN Myosin light polypeptide 6           | 1  |                                         | VLDHFHFLPMLQTVAK                    | 63  | 16 | 15 | 140    | b2b3b6b8y2y3y4y5y6y8y9y10y11y14y16       | 1887.98 | 102.458 | 231781 | 3 | 630.00  | -12.54 |
| [P60660]MYL6_HUMAN Myosin light polypeptide 6           | 2  |                                         | ALGQNPTNAEVLK                       | 37  | 13 | 13 | 83.59  | b2b3b4b5*b5b10*b10y2y7y8y9y11y13         | 1354.73 | 45.380  | 170322 | 2 | 677.87  | 0.00   |
| [P60660]MYL6_HUMAN Myosin light polypeptide 6           | 3  | Carbamidomethyl+C(6)                    | ILYSQCGDVMR                         | 26  | 11 | 10 | 82.21  | b2y2y3y5y6y7y8y9y11*y11                  | 1341.63 | 49.026  | 138359 | 2 | 671.32  | 1.18   |
| [P60660]MYL6_HUMAN Myosin light polypeptide 6           | 4  |                                         | VFDKEGNGTVMGAEIR                    | 94  | 16 | 6  | 24.52  | b2b9b11y5y7y16                           | 1722.83 | 50.114  | 99422  | 3 | 574.95  | -8.08  |
| [P60660]MYL6_HUMAN Myosin light polypeptide 6           | 5  |                                         | NKDQGT YEDYVEGLR                    | 79  | 15 | 5  | 36.97  | y3y6y7y9y15                              | 1786.82 | 56.645  | 83470  | 3 | 596.28  | -3.55  |
| [P60660]MYL6_HUMAN Myosin light polypeptide 6           | 6  |                                         | EGNGTVMGAEIR                        | 98  | 12 | 5  | 35.7   | b12y5y6y7y12                             | 1233.59 | 43.842  | 44258  | 2 | 617.30  | 0.69   |
| [P60660]MYL6_HUMAN Myosin light polypeptide 6           | 7  | Carbamidomethyl+C(2)                    | MCDFTEDQTAEFK                       | 0   | 13 | 4  | 30.08  | y7y10*y10y12                             | 1621.66 | 93.548  | 26348  | 3 | 541.23  | 6.77   |
| [P60660]MYL6_HUMAN Myosin light polypeptide 6           | 8  | Carbamidomethyl+C(19)                   | MTEEEVEMLVAGHEDSNGCINYE AFVR        | 119 | 27 | 3  | 11.99  | b15y5y8                                  | 3129.42 | 91.695  | 46852  | 3 | 1043.81 | 20.75  |
| [P60660]MYL6_HUMAN Myosin light polypeptide 6           | 9  |                                         | DQGT YEDYVEGLR                      | 81  | 13 | 7  | 41.7   | b3b10*b10y7y8y11*y11                     | 1544.66 | 46.199  | 6424   | 3 | 515.56  | -19.60 |
| [P60660]MYL6_HUMAN Myosin light polypeptide 6           | 10 |                                         | EAFQLFDR                            | 13  | 8  | 10 | 67.71  | b3*b3b4*b4b6*b6y3*y3y5*y5                | 1025.49 | 20.594  | 3508   | 2 | 513.25  | -17.62 |
| [P60660]MYL6_HUMAN Myosin light polypeptide 6           | 11 |                                         | EAFQLFDRTGDGK                       | 13  | 13 | 3  | 20.83  | b5b8y9                                   | 1483.73 | 80.226  | 43923  | 2 | 742.37  | 6.42   |
| [P60660]MYL6_HUMAN Myosin light polypeptide 6           | 12 |                                         | VFDKEGNGTVMGAEIR                    | 94  | 16 | 3  | 17.33  | b6y6y12                                  | 1722.84 | 66.985  | 9250   | 2 | 861.93  | -2.13  |
| [P60660]MYL6_HUMAN Myosin light polypeptide 6           | 13 | Carbamidomethyl+C(11)                   | TGDGKILYSQCGDVMR                    | 21  | 16 | 6  | 17.33  | b12*b12b15*b15y13*y13                    | 1799.83 | 63.721  | 7827   | 2 | 900.42  | -6.51  |
| [P60660]MYL6_HUMAN Myosin light polypeptide 6           | 14 |                                         | SDEMNVKVLDFEHFLPMLQTVAK             | 56  | 23 | 5  | 17.69  | b15*b15b20y12y14                         | 2691.32 | 136.836 | 5487   | 2 | 1346.16 | -12.97 |
| [P60660]MYL6_HUMAN Myosin light polypeptide 6           | 15 |                                         | VLGNPKSDEMNVK                       | 50  | 13 | 7  | 77.06  | b3b4y3y4y6y9y10                          | 1430.72 | 98.366  | 3317   | 2 | 715.87  | -5.63  |
| [P60660]MYL6_HUMAN Myosin light polypeptide 6           | 16 | Carbamidomethyl+C(2); Phosphoryl STY(9) | MCDFTEDQTAEFKEAFQLFDR               | 0   | 21 | 3  | 14.01  | b10_H3PO4 b10b15_HPO3 b15y11             | 2708.06 | 136.816 | 5887   | 2 | 1354.53 | -14.51 |
| [P60660]MYL6_HUMAN Myosin light polypeptide 6           | 17 | Oxidation+M(7)                          | EGNGTVMGAEIR                        | 98  | 12 | 5  | 34.53  | b4b5*b5b8y4                              | 1249.58 | 24.246  | 2063   | 2 | 625.29  | -5.08  |
| [P60660]MYL6_HUMAN Myosin light polypeptide 6           | 18 |                                         | VMGAEIR                             | 103 | 7  | 0  | 4.36   |                                          | 775.41  | 50.151  | 3622   | 1 | 775.41  | -6.45  |
| [P60660]MYL6_HUMAN Myosin light polypeptide 6           | 19 |                                         | PMLQTVAK                            | 71  | 8  | 2  | 20.97  | b3b4                                     | 887.49  | 102.462 | 2193   | 2 | 444.25  | -9.15  |
| [P60660]MYL6_HUMAN Myosin light polypeptide 6           | 20 |                                         | TNAEVLK                             | 43  | 7  | 0  | 3.17   |                                          | 774.45  | 45.344  | 1995   | 2 | 387.73  | 12.53  |
| [P67936]TPM4_HUMAN Tropomyosin alpha-4 chain            | 1  |                                         | IQLVEEELDR                          | 55  | 10 | 17 | 101.43 | b2*b2b3y1y2y3y4*y4y5y6*y6y7y8y9*y9*y9y10 | 1243.66 | 59.541  | 441297 | 2 | 622.33  | 5.01   |

|                                             |    |                      |                         |     |    |    |        |                                                                       |         |         |         |   |        |        |
|---------------------------------------------|----|----------------------|-------------------------|-----|----|----|--------|-----------------------------------------------------------------------|---------|---------|---------|---|--------|--------|
| P67936 TPM4_HUMAN Tropomyosin alpha-4 chain | 2  |                      | IQALQQADEAEDR           | 13  | 14 | 22 | 142.43 | b2*b2b3b4b10b13y1y2y3y4y5*y5y8*y8y9*y9y10*y10*y10y11y12y14            | 1614.77 | 39.996  | 191902  | 2 | 807.89 | 1.36   |
| P67936 TPM4_HUMAN Tropomyosin alpha-4 chain | 3  |                      | MEIQEMQLK               | 104 | 9  | 12 | 79.65  | b2b3b4*b4y1y4y5*y5*y5y7y8y9                                           | 1149.57 | 57.143  | 152555  | 2 | 575.29 | 3.61   |
| P67936 TPM4_HUMAN Tropomyosin alpha-4 chain | 4  |                      | AEGDVAALNRR             | 44  | 11 | 10 | 41.79  | b1b6y1y2y5*y5y7y9*y9y11                                               | 1171.61 | 30.382  | 103655  | 2 | 586.31 | -4.38  |
| P67936 TPM4_HUMAN Tropomyosin alpha-4 chain | 5  |                      | AEGDVAALNR              | 44  | 10 | 9  | 74.82  | b2b7y1y4y5y6y7y8y10                                                   | 1015.52 | 33.600  | 47981   | 2 | 508.26 | -1.68  |
| P67936 TPM4_HUMAN Tropomyosin alpha-4 chain | 6  |                      | LVILEGELER              | 132 | 10 | 5  | 40.43  | b3y3y7y8y10                                                           | 1170.67 | 67.415  | 45471   | 2 | 585.84 | -0.83  |
| P67936 TPM4_HUMAN Tropomyosin alpha-4 chain | 7  |                      | NVTNNLKSLEAASEK         | 162 | 15 | 8  | 37.44  | b3*b3*b3b8y3y4*y4y8                                                   | 1617.86 | 90.115  | 184836  | 2 | 809.43 | 7.92   |
| P67936 TPM4_HUMAN Tropomyosin alpha-4 chain | 8  |                      | KLVILEGELER             | 131 | 11 | 7  | 65.39  | b4b5b6y5y6*y6y9                                                       | 1298.77 | 62.490  | 93469   | 2 | 649.89 | 2.63   |
| P67936 TPM4_HUMAN Tropomyosin alpha-4 chain | 9  |                      | KIQALQQADEAEDR          | 12  | 15 | 9  | 97.35  | b3b5y4y5y6y7y8y9y12                                                   | 1742.85 | 37.305  | 82447   | 3 | 581.62 | -7.35  |
| P67936 TPM4_HUMAN Tropomyosin alpha-4 chain | 10 |                      | IQLVEEELDRAQER          | 55  | 14 | 4  | 27.25  | y4y11*y11y12                                                          | 1727.89 | 59.077  | 48068   | 3 | 576.63 | -2.97  |
| P67936 TPM4_HUMAN Tropomyosin alpha-4 chain | 11 |                      | LEEAEKAADESER           | 76  | 13 | 4  | 43.38  | y4y5y6y8                                                              | 1476.67 | 25.594  | 34360   | 3 | 492.89 | -7.69  |
| P67936 TPM4_HUMAN Tropomyosin alpha-4 chain | 12 |                      | EKAEGDVAALNR            | 42  | 12 | 5  | 36.45  | b5b8y8y9*y9                                                           | 1272.64 | 31.158  | 8716    | 2 | 636.82 | -9.40  |
| P67936 TPM4_HUMAN Tropomyosin alpha-4 chain | 13 |                      | AQGLQRELDGER            | 27  | 12 | 4  | 26.46  | b10*b10b11y8                                                          | 1371.70 | 94.254  | 5724    | 2 | 686.35 | -1.42  |
| P67936 TPM4_HUMAN Tropomyosin alpha-4 chain | 14 |                      | EAETRAEFAER             | 197 | 11 | 5  | 38.61  | b4b9y6y7*y7                                                           | 1308.61 | 30.477  | 2974    | 2 | 654.81 | -6.34  |
| P67936 TPM4_HUMAN Tropomyosin alpha-4 chain | 15 |                      | GDVAALNRR               | 46  | 9  | 4  | 31.5   | b3b4b6*b6                                                             | 971.53  | 30.395  | 50417   | 2 | 486.27 | -6.35  |
| P67936 TPM4_HUMAN Tropomyosin alpha-4 chain | 16 |                      | EGDVAALNRR              | 45  | 10 | 1  | 7.9    | b9                                                                    | 1100.57 | 30.383  | 20616   | 2 | 550.79 | -10.76 |
| P67936 TPM4_HUMAN Tropomyosin alpha-4 chain | 17 |                      | AEGDVAALNRR             | 44  | 11 | 0  | 2.38   |                                                                       | 1153.60 | 30.429  | 3611    | 3 | 385.20 | -5.71  |
| Q9BYX7 ACTK_HUMAN Kappa-actin               | 1  |                      | SYELPDGQVITIGNER        | 238 | 16 | 25 | 199.45 | b2b3b8b9*b9b10b11*b11b12*b12y3*y3y4y5y6*y6y7y8y10*y10y11y12*y12y13y16 | 1790.90 | 71.671  | 2789179 | 2 | 895.96 | 7.02   |
| Q9BYX7 ACTK_HUMAN Kappa-actin               | 2  |                      | QEYDESGPSIVHRK          | 359 | 14 | 24 | 175.06 | b3*b3b4*b4*b4b5b7*b7b14y2y3y4y5y6*y6y7y8y9y10*y10y11y12y14*y14        | 1644.78 | 32.248  | 414928  | 3 | 548.93 | -11.87 |
| Q9BYX7 ACTK_HUMAN Kappa-actin               | 3  |                      | QEYDESGPSIVHR           | 359 | 13 | 6  | 78.23  | y3y4y5y6y8y11                                                         | 1516.70 | 38.099  | 279257  | 3 | 506.24 | -0.32  |
| Q9BYX7 ACTK_HUMAN Kappa-actin               | 4  | Carbamidomethyl+C(2) | LCYVALDSEQEMAMAASSSSVEK | 215 | 23 | 3  | 13.16  | b11y5y11                                                              | 2506.15 | 74.216  | 10152   | 3 | 836.05 | 13.05  |
| Q9BYX7 ACTK_HUMAN Kappa-actin               | 5  |                      | HQGMMEGMHQK             | 39  | 11 | 4  | 37.02  | b3b4b10y6                                                             | 1313.58 | 32.050  | 16257   | 2 | 657.30 | 22.21  |
| Q9BYX7 ACTK_HUMAN Kappa-actin               | 6  |                      | ELTDYLMK                | 183 | 8  | 3  | 41.1   | b3b5b6                                                                | 1012.51 | 46.219  | 6292    | 2 | 506.76 | 6.87   |
| Q9BYX7 ACTK_HUMAN Kappa-actin               | 7  |                      | GMLTLKYPMEHGII TNWDDMEK | 62  | 22 | 3  | 13.56  | b13y3y5                                                               | 2622.25 | 100.280 | 17173   | 3 | 874.76 | 4.47   |
| Q9BYX7 ACTK_HUMAN Kappa-actin               | 8  |                      | ELTDYLMKILTER           | 183 | 13 | 3  | 20.83  | b8y5y11                                                               | 1624.86 | 64.523  | 11665   | 3 | 542.29 | -0.75  |
| Q9BYX7 ACTK_HUMAN Kappa-actin               | 9  |                      | GYRFTTTAEQEIVR          | 196 | 14 | 4  | 27.84  | b7b9y4y6                                                              | 1670.83 | 68.324  | 6906    | 4 | 418.46 | -10.67 |

|                                                |    |                                                                          |                                    |     |    |    |        |                                        |         |         |        |   |         |        |
|------------------------------------------------|----|--------------------------------------------------------------------------|------------------------------------|-----|----|----|--------|----------------------------------------|---------|---------|--------|---|---------|--------|
| Q9BYX7 ACTK_HUMAN Kappa-actin                  | 10 | Carbamidomethyl+C(3);<br>Carbamidomethyl+C(11);<br>Carbamidomethyl+C(18) | FRCPEALFQPCFLGMESCGIHK             | 254 | 22 | 7  | 25.89  | b7°b7b10°b10b14y5y7                    | 2684.24 | 136.311 | 2155   | 3 | 895.42  | 7.09   |
| Q9BYX7 ACTK_HUMAN Kappa-actin                  | 11 | Phosphoryl STY(16)                                                       | KDLYTNTVLSGGTTMYPGIAHR             | 290 | 22 | 5  | 13.56  | b5b14_H3PO4<br>b14°b14°b14y7           | 2475.19 | 106.122 | 15910  | 3 | 825.73  | 8.38   |
| Q9BYX7 ACTK_HUMAN Kappa-actin                  | 12 | Phosphoryl STY(19)                                                       | TTGIVMDSGDGFTHTVPIYEGNAL<br>PHATLR | 147 | 30 | 5  | 16.67  | b9b13°b13b17y13                        | 3250.50 | 102.065 | 1741   | 3 | 1084.17 | -5.26  |
| Q9BYX7 ACTK_HUMAN Kappa-actin                  | 13 | Carbamidomethyl+C(16);<br>Oxidation+M(15)                                | DDDTAVLVIDNGSGMCK                  | 1   | 17 | 3  | 16.48  | b4b13y11                               | 1825.79 | 46.348  | 11364  | 4 | 457.20  | -3.14  |
| Q9BYX7 ACTK_HUMAN Kappa-actin                  | 14 | Carbamidomethyl+C(17);<br>Oxidation+M(16)                                | MDDDTAVLVIDNGSGMCK                 | 0   | 18 | 3  | 15.73  | b12b15y11                              | 1956.83 | 46.338  | 4182   | 2 | 978.92  | -3.31  |
| Q9BYX7 ACTK_HUMAN Kappa-actin                  | 15 | Oxidation+M(14)                                                          | DLYTNTVLSGGTTMYPGIAHR              | 291 | 21 | 6  | 41.91  | b11b12b14b15°b15y11                    | 2283.10 | 76.510  | 1809   | 3 | 761.70  | -4.28  |
| Q86UX7 URP2_HUMAN Fermitin family<br>homolog 3 | 1  |                                                                          | VVLAGGVAPALFR                      | 166 | 13 | 12 | 100.36 | b2b3b4b6y1y5y6y8y9y1<br>0y11y13        | 1269.77 | 77.825  | 183218 | 2 | 635.39  | -0.58  |
| Q86UX7 URP2_HUMAN Fermitin family<br>homolog 3 | 2  |                                                                          | LLVSPPEGMSEIYLR                    | 423 | 15 | 11 | 45.05  | b2b3y1y2y3y6y10y11°y<br>12°y12y15      | 1703.91 | 86.046  | 119671 | 2 | 852.46  | 5.73   |
| Q86UX7 URP2_HUMAN Fermitin family<br>homolog 3 | 3  | Carbamidomethyl+C(15)                                                    | ASFSQPLFQAVAAICR                   | 113 | 16 | 15 | 130.38 | b3°b3b4b5y1y2y3y4y5y<br>6y7y8y9y11y16  | 1765.91 | 92.081  | 115315 | 2 | 883.46  | 4.22   |
| Q86UX7 URP2_HUMAN Fermitin family<br>homolog 3 | 4  |                                                                          | TGSGGPGNHPHPDASAEGLNPY<br>GLVAPR   | 481 | 29 | 14 | 99.65  | b12b14b21y2y3y4y5y6y<br>7y8y9°y9y11y29 | 2782.32 | 59.735  | 109603 | 4 | 696.33  | -4.30  |
| Q86UX7 URP2_HUMAN Fermitin family<br>homolog 3 | 5  | Carbamidomethyl+C(2)                                                     | GCEVVPDVNVSGQK                     | 405 | 14 | 11 | 93.19  | b2b3b4y3°y3y4y5y8y9y<br>10y14          | 1487.72 | 48.380  | 71771  | 2 | 744.37  | 4.51   |
| Q86UX7 URP2_HUMAN Fermitin family<br>homolog 3 | 6  |                                                                          | LEGSAPTVDVLSLTIPELK                | 333 | 20 | 7  | 36.45  | b10b13b16y2y4y5y20                     | 2099.12 | 95.427  | 62755  | 2 | 1050.07 | 5.82   |
| Q86UX7 URP2_HUMAN Fermitin family<br>homolog 3 | 7  |                                                                          | AGDALWLR                           | 242 | 8  | 6  | 49.64  | b6y2y3y4y5y8                           | 901.49  | 62.015  | 55403  | 2 | 451.25  | -3.25  |
| Q86UX7 URP2_HUMAN Fermitin family<br>homolog 3 | 8  | Carbamidomethyl+C(16);<br>Carbamidomethyl+C(21)                          | QVAIEFDEHINVAFSCVSASCR             | 607 | 22 | 8  | 51.93  | b13b14°b14y10y11y12y<br>14y22          | 2539.16 | 81.699  | 48146  | 3 | 847.06  | -4.52  |
| Q86UX7 URP2_HUMAN Fermitin family<br>homolog 3 | 9  |                                                                          | LSQSGEVGEPAGTDPGLDDLDVA<br>LSNLEVK | 303 | 30 | 7  | 31.97  | b9y5y6y8y10y16y30                      | 3025.49 | 95.937  | 39951  | 3 | 1009.17 | 1.05   |
| Q86UX7 URP2_HUMAN Fermitin family<br>homolog 3 | 10 |                                                                          | GEELDEDLFLQLTGHEAF                 | 648 | 19 | 8  | 26.1   | b2b18y1y6y7°y7y11y19                   | 2120.00 | 101.122 | 18311  | 2 | 1060.50 | 9.33   |
| Q86UX7 URP2_HUMAN Fermitin family<br>homolog 3 | 11 |                                                                          | TASGDYIDSSWELR                     | 5   | 14 | 5  | 45.62  | b3b7b13y10y11                          | 1599.74 | 68.363  | 13561  | 2 | 800.38  | 10.00  |
| Q86UX7 URP2_HUMAN Fermitin family<br>homolog 3 | 12 |                                                                          | TMADSSYTSEVQAILAFSLQR              | 459 | 22 | 10 | 63.12  | b2b4y3y4°y4y5y6°y6y7<br>y22            | 2431.23 | 120.515 | 12759  | 2 | 1216.12 | 6.03   |
| Q86UX7 URP2_HUMAN Fermitin family<br>homolog 3 | 13 |                                                                          | IDLAVGDVVK                         | 580 | 10 | 7  | 54.7   | b3b6b7°b7y8°y8y9                       | 1028.59 | 57.164  | 352077 | 2 | 514.80  | -4.15  |
| Q86UX7 URP2_HUMAN Fermitin family<br>homolog 3 | 14 |                                                                          | ILEAHQNVAAQLSLAEALQR               | 523 | 19 | 8  | 67.48  | b7b8°b8b9y4y6y7y8                      | 2104.14 | 66.250  | 102841 | 3 | 702.05  | -6.38  |
| Q86UX7 URP2_HUMAN Fermitin family<br>homolog 3 | 15 |                                                                          | VFVGEEDPEAESVTLR                   | 19  | 16 | 6  | 42.31  | b6b7°b7y7y10y11                        | 1776.89 | 60.439  | 62622  | 2 | 888.95  | 11.75  |
| Q86UX7 URP2_HUMAN Fermitin family<br>homolog 3 | 16 |                                                                          | SQDEAPGDPIQLNLK                    | 389 | 16 | 6  | 39.13  | b3°b3b5°b5b7b11                        | 1752.89 | 30.323  | 20633  | 2 | 876.95  | 10.45  |
| Q86UX7 URP2_HUMAN Fermitin family<br>homolog 3 | 17 | Carbamidomethyl+C(10)                                                    | WDLLEEIDCTEEMMVFAALQY<br>HINK      | 276 | 27 | 3  | 21.99  | b10b11y14                              | 3340.58 | 71.156  | 5011   | 4 | 835.90  | 5.70   |
| Q86UX7 URP2_HUMAN Fermitin family<br>homolog 3 | 18 |                                                                          | WLDSSR                             | 228 | 6  | 1  | 13.7   | b4                                     | 763.37  | 42.413  | 4848   | 1 | 763.37  | -3.12  |
| Q86UX7 URP2_HUMAN Fermitin family<br>homolog 3 | 19 |                                                                          | EPEEELYDLSK                        | 155 | 11 | 4  | 41.62  | b9b10y6y7                              | 1351.60 | 36.494  | 2585   | 2 | 676.31  | -16.35 |
| Q86UX7 URP2_HUMAN Fermitin family<br>homolog 3 | 20 |                                                                          | YYSFFDLDPK                         | 252 | 10 | 6  | 58.5   | b3y4y5y6°y6y8                          | 1294.63 | 20.600  | 2522   | 2 | 647.82  | 21.22  |

|                                                          |    |                       |                                   |     |    |    |        |                                                            |         |        |         |   |         |        |
|----------------------------------------------------------|----|-----------------------|-----------------------------------|-----|----|----|--------|------------------------------------------------------------|---------|--------|---------|---|---------|--------|
| [Q86UX7 URP2_HUMAN Fermitin family homolog 3             | 21 |                       | QDWSDHAIWWEQK                     | 56  | 13 | 3  | 20.83  | b10y4y9                                                    | 1728.78 | 42.937 | 2424    | 2 | 864.89  | 0.21   |
| [Q86UX7 URP2_HUMAN Fermitin family homolog 3             | 22 |                       | YYSFFDLDPKTDPVR                   | 252 | 15 | 3  | 18.32  | b11y11y13                                                  | 1862.92 | 66.007 | 59190   | 3 | 621.65  | 14.09  |
| [Q86UX7 URP2_HUMAN Fermitin family homolog 3             | 23 | Carbamidomethyl+C(18) | SQDEAPGDPIQLNLKGCVEVPD<br>VNVSGQK | 389 | 30 | 4  | 11.44  | b15y4y12°y12                                               | 3221.59 | 80.490 | 54874   | 3 | 1074.54 | 5.46   |
| [Q86UX7 URP2_HUMAN Fermitin family homolog 3             | 24 |                       | ARGEELDEDLFLQLTGGHEAF             | 646 | 21 | 4  | 30.23  | b4b5b7b9                                                   | 2347.12 | 95.329 | 18231   | 3 | 783.04  | -1.46  |
| [Q86UX7 URP2_HUMAN Fermitin family homolog 3             | 25 |                       | TQLHSRWLDSSR                      | 222 | 12 | 3  | 32.69  | b4b9b11                                                    | 1485.78 | 62.188 | 8412    | 2 | 743.39  | 14.62  |
| [Q86UX7 URP2_HUMAN Fermitin family homolog 3             | 26 |                       | EKEPEEELYDSLK                     | 153 | 13 | 3  | 30.08  | b5b10b12                                                   | 1608.77 | 65.058 | 6834    | 2 | 804.89  | 6.30   |
| [Q86UX7 URP2_HUMAN Fermitin family homolog 3             | 27 |                       | FSNMRQWNVNWDIR                    | 593 | 14 | 4  | 28.04  | y5y7*y7y13                                                 | 1865.89 | 69.538 | 6493    | 2 | 933.45  | 2.36   |
| [Q86UX7 URP2_HUMAN Fermitin family homolog 3             | 28 | Carbamidomethyl+C(7)  | WLDSRCLMQQGIK                     | 228 | 14 | 4  | 19.47  | b13*b13y3y12                                               | 1721.86 | 71.179 | 5358    | 3 | 574.62  | 6.59   |
| [Q86UX7 URP2_HUMAN Fermitin family homolog 3             | 29 |                       | FKYYSFFDLDPK                      | 250 | 12 | 3  | 26.46  | b4y10y11                                                   | 1569.77 | 84.602 | 1665    | 3 | 523.93  | 6.61   |
| [Q86UX7 URP2_HUMAN Fermitin family homolog 3             | 30 | Phosphoryl STY(2)     | LTQLYEQAR                         | 267 | 9  | 3  | 30.71  | b4y6y8                                                     | 1201.56 | 64.223 | 175570  | 3 | 401.19  | 4.27   |
| [Q86UX7 URP2_HUMAN Fermitin family homolog 3             | 31 | Phosphoryl STY(13)    | IVHEYIGGYIFLSTR                   | 629 | 15 | 5  | 32.08  | b11b14y10y11°y11                                           | 1847.90 | 88.814 | 4432    | 3 | 616.64  | -1.85  |
| [P69891 HGB1_HUMAN Hemoglobin subunit gamma-1            | 1  |                       | LLVVYPWTQR                        | 31  | 10 | 21 | 130.25 | b2b3b4b5y1y2*y2y3°y3<br>*y3y4y5°y5*y5y6*y6y7<br>*y7y8y9y10 | 1274.72 | 79.093 | 1756497 | 2 | 637.87  | -1.92  |
| [P69891 HGB1_HUMAN Hemoglobin subunit gamma-1            | 2  |                       | VNVEDAGGETLGR                     | 18  | 13 | 5  | 20.83  | b11y2y5y7y13                                               | 1316.65 | 59.158 | 9462    | 2 | 658.83  | 5.66   |
| [P69891 HGB1_HUMAN Hemoglobin subunit gamma-1            | 3  |                       | FFDSFGNLSSASAIMGNPK               | 41  | 19 | 6  | 20.93  | b4b9*b9y10y16*y16                                          | 1989.94 | 84.966 | 5199    | 2 | 995.47  | 2.27   |
| [P69891 HGB1_HUMAN Hemoglobin subunit gamma-1            | 4  |                       | MGHFTEEDKATITSLWGK                | 0   | 18 | 3  | 24.66  | b4b5b13                                                    | 2050.99 | 72.058 | 19407   | 3 | 684.34  | 1.55   |
| [P69891 HGB1_HUMAN Hemoglobin subunit gamma-1            | 5  |                       | MVTAVASALSSRYH                    | 133 | 14 | 4  | 27.84  | b4b11y3y7                                                  | 1492.77 | 66.123 | 8668    | 3 | 498.26  | 11.45  |
| [P69891 HGB1_HUMAN Hemoglobin subunit gamma-1            | 6  | Phosphoryl STY()      | FFDSFGNLSSASAIMGNPK               | 41  | 19 | 6  | 20.93  | b8°b8*b8b11y7y10                                           | 2069.92 | 43.135 | 4993    | 2 | 1035.47 | 14.51  |
| [P69892 HGB2_HUMAN Hemoglobin subunit gamma-2            | 1  |                       | LLVVYPWTQR                        | 31  | 10 | 21 | 130.25 | b2b3b4b5y1y2*y2y3°y3<br>*y3y4y5°y5*y5y6*y6y7<br>*y7y8y9y10 | 1274.72 | 79.093 | 1756497 | 2 | 637.87  | -1.92  |
| [P69892 HGB2_HUMAN Hemoglobin subunit gamma-2            | 2  |                       | VNVEDAGGETLGR                     | 18  | 13 | 5  | 20.83  | b11y2y5y7y13                                               | 1316.65 | 59.158 | 9462    | 2 | 658.83  | 5.66   |
| [P69892 HGB2_HUMAN Hemoglobin subunit gamma-2            | 3  |                       | FFDSFGNLSSASAIMGNPK               | 41  | 19 | 6  | 20.93  | b4b9*b9y10y16*y16                                          | 1989.94 | 84.966 | 5199    | 2 | 995.47  | 2.27   |
| [P69892 HGB2_HUMAN Hemoglobin subunit gamma-2            | 4  |                       | MVTGVASALSSR                      | 133 | 12 | 3  | 35.7   | y7y8y9                                                     | 1178.60 | 52.869 | 20033   | 2 | 589.80  | -16.99 |
| [P69892 HGB2_HUMAN Hemoglobin subunit gamma-2            | 5  | Oxidation+M(1)        | MVTGVASALSSR                      | 133 | 12 | 3  | 22.48  | b11y3y7                                                    | 1194.60 | 68.734 | 11658   | 2 | 597.81  | -9.91  |
| [P24844 MYL9_HUMAN Myosin regulatory light polypeptide 9 | 1  |                       | LNGTDPEDVIR                       | 93  | 11 | 7  | 68.9   | y1y3y4y6y8y9y11                                            | 1228.62 | 49.138 | 149253  | 2 | 614.81  | -0.89  |
| [P24844 MYL9_HUMAN Myosin regulatory light polypeptide 9 | 2  |                       | ATSNVFMFDQSQIQEFK                 | 17  | 18 | 8  | 40.47  | b4b5y2y3y4*y4y10y18                                        | 2091.00 | 90.349 | 96968   | 2 | 1046.00 | 6.54   |
| [P24844 MYL9_HUMAN Myosin regulatory light polypeptide 9 | 3  |                       | GNFNVYEFTR                        | 151 | 10 | 5  | 52.19  | b2y4y5y6y8                                                 | 1246.59 | 62.719 | 46352   | 2 | 623.80  | 4.99   |
| [P24844 MYL9_HUMAN Myosin regulatory light polypeptide 9 | 4  |                       | ELLTTMGDR                         | 124 | 9  | 8  | 68.11  | b9y3y4°y4y5y6y7y9                                          | 1035.51 | 49.250 | 34474   | 2 | 518.26  | -4.83  |
| [P24844 MYL9_HUMAN Myosin regulatory light polypeptide 9 | 5  |                       | ATSNVFMFDQSQIQEFKEAFNMI<br>DQNR   | 17  | 28 | 9  | 43.36  | b6b8b15°b15b16y9y13y<br>18y26                              | 3309.49 | 81.577 | 24352   | 3 | 1103.83 | -13.50 |



|                                                         |    |                                            |                                     |     |    |    |        |                                                                 |         |         |         |   |         |        |
|---------------------------------------------------------|----|--------------------------------------------|-------------------------------------|-----|----|----|--------|-----------------------------------------------------------------|---------|---------|---------|---|---------|--------|
| P24844 MYL9_HUMAN Myosin regulatory light polypeptide 9 | 6  | Carbamidomethyl+C(5)                       | NAFACFDEEASGFIHEDHLR                | 104 | 20 | 6  | 45.53  | y5°y5y7y12y13y14                                                | 2365.07 | 107.097 | 1818    | 2 | 1183.04 | 15.79  |
| P24844 MYL9_HUMAN Myosin regulatory light polypeptide 9 | 7  | Carbamidomethyl+C(16)                      | LNGTDPEDVIRNAFACFDEEASGF IHEDHLR    | 93  | 31 | 3  | 22.1   | b12b13y12                                                       | 3574.64 | 74.006  | 2924    | 3 | 1192.22 | 1.64   |
| P24844 MYL9_HUMAN Myosin regulatory light polypeptide 9 | 8  | Oxidation+M()                              | EAFNMIDQNRDGFIDK                    | 35  | 16 | 7  | 42.99  | b4b13b14°b14b15y9°y9                                            | 1928.85 | 88.875  | 10645   | 2 | 964.93  | -14.56 |
| P24844 MYL9_HUMAN Myosin regulatory light polypeptide 9 | 9  | Oxidation+M()                              | EAFNMIDQNRDGFIDKEDLHDML ASLGK       | 35  | 28 | 3  | 21.99  | b10y11y12                                                       | 3238.56 | 112.155 | 2517    | 3 | 1080.19 | 13.04  |
| P07437 TBB5_HUMAN Tubulin beta chain                    | 1  |                                            | SGPFGQIFRPDNFVFGQSGAGNN WAK         | 77  | 26 | 13 | 41.26  | b2°b2b13b14b17y1y2y6 y9y12*y12y14y26                            | 2798.36 | 90.206  | 180420  | 3 | 933.46  | 6.19   |
| P07437 TBB5_HUMAN Tubulin beta chain                    | 2  |                                            | LAVNMVPPFR                          | 252 | 10 | 15 | 101.43 | b2b5*b5y1y2y3y4y5y6y7*y7y8y9*y9y10                              | 1143.63 | 72.994  | 161983  | 2 | 572.32  | -2.24  |
| P07437 TBB5_HUMAN Tubulin beta chain                    | 3  |                                            | ALTVPELTQQVFDK                      | 282 | 15 | 6  | 29.7   | b3°b3y8y11y12y15                                                | 1659.90 | 84.573  | 91759   | 2 | 830.46  | 4.85   |
| P07437 TBB5_HUMAN Tubulin beta chain                    | 4  |                                            | IMNTFSVPSPK                         | 162 | 12 | 7  | 64.53  | y4°y4y5y6y7y8y12                                                | 1319.71 | 63.914  | 89853   | 2 | 660.36  | 2.41   |
| P07437 TBB5_HUMAN Tubulin beta chain                    | 5  | Carbamidomethyl+C(23)                      | LTTPTYGDLNHLVSATMSGVTTCLR           | 216 | 25 | 9  | 65.04  | y2y3y5y6y7y8y12y22y25                                           | 2708.33 | 95.908  | 82625   | 3 | 903.45  | -2.43  |
| P07437 TBB5_HUMAN Tubulin beta chain                    | 6  |                                            | FWEVISDEHGIDPTGTYHGDSDLQLDR         | 19  | 27 | 7  | 31.46  | b5b9b13°b13y25*y25y26                                           | 3102.42 | 74.906  | 19529   | 4 | 776.36  | 4.33   |
| P07437 TBB5_HUMAN Tubulin beta chain                    | 7  | Carbamidomethyl+C(6); Carbamidomethyl+C(8) | KEAESCDCQLQGFQLTHSLGGGTG SGMGTLLISK | 121 | 33 | 5  | 13.42  | b3b22y4y7y33                                                    | 3439.63 | 78.423  | 15018   | 3 | 1147.22 | 0.35   |
| P07437 TBB5_HUMAN Tubulin beta chain                    | 8  | Carbamidomethyl+C(10)                      | EIVHIQAGQCGNQIGAK                   | 2   | 17 | 5  | 23.17  | b1b8b11y4y6                                                     | 1822.90 | 61.126  | 8173    | 2 | 911.95  | -13.93 |
| P07437 TBB5_HUMAN Tubulin beta chain                    | 9  |                                            | ISVYYNEATGGK                        | 46  | 12 | 3  | 26.46  | b5y9y10                                                         | 1301.64 | 45.252  | 36402   | 2 | 651.32  | 1.50   |
| P07437 TBB5_HUMAN Tubulin beta chain                    | 10 |                                            | MAVTFIGNSTAIQELFK                   | 362 | 17 | 4  | 16.48  | b5°b5b14y11                                                     | 1869.94 | 71.379  | 2173    | 2 | 935.47  | -22.65 |
| P07437 TBB5_HUMAN Tubulin beta chain                    | 11 | Carbamidomethyl+C(10)                      | EIVHIQAGQCGNQI                      | 2   | 14 | 1  | 7.27   | y13                                                             | 1566.79 | 61.045  | 13277   | 2 | 783.90  | 11.45  |
| P02768 ALBU_HUMAN Serum albumin                         | 1  | Carbamidomethyl+C(3)                       | YICENQDSISSK                        | 286 | 12 | 22 | 103.94 | b2b3b8*b8b9°b9°b9b10 b12y2°y2y3y4y9°y9°y9 y10°y10*y10y11°y11y12 | 1443.64 | 33.897  | 1502962 | 2 | 722.32  | -1.69  |
| P02768 ALBU_HUMAN Serum albumin                         | 2  | Carbamidomethyl+C(1); Carbamidomethyl+C(2) | CCTESLVNR                           | 499 | 9  | 21 | 103.25 | b1b2b3b4°b4b9y2*y2y3 *y3y4*y4y5y6°y6*y6y7 °y7y8°y8y9            | 1138.50 | 32.711  | 181168  | 2 | 569.75  | -2.14  |
| P02768 ALBU_HUMAN Serum albumin                         | 3  |                                            | VPQVSTPTLVEVSR                      | 438 | 14 | 12 | 96.28  | b3b4b13y1y3y8y9y10y11y12*y12y14                                 | 1511.85 | 60.406  | 125147  | 2 | 756.43  | 3.23   |
| P02768 ALBU_HUMAN Serum albumin                         | 4  |                                            | LVNEVTEFAK                          | 65  | 10 | 5  | 34.11  | b2y5y6y8y10                                                     | 1149.61 | 54.946  | 93439   | 2 | 575.31  | -1.38  |
| P02768 ALBU_HUMAN Serum albumin                         | 5  | Carbamidomethyl+C(3)                       | QNCLEFEQLGEYK                       | 413 | 13 | 10 | 67.95  | b9b13y2y3°y3y7y9y10y12y13                                       | 1657.77 | 71.441  | 91290   | 2 | 829.39  | 9.87   |
| P02768 ALBU_HUMAN Serum albumin                         | 6  |                                            | VFDEFKPLVEEPQNLIK                   | 396 | 17 | 8  | 26.39  | b1b2b13°b13y2y6y11y14                                           | 2045.08 | 82.961  | 88448   | 3 | 682.37  | -6.92  |
| P02768 ALBU_HUMAN Serum albumin                         | 7  | Carbamidomethyl+C(6); Carbamidomethyl+C(7) | AAFTECCQAADK                        | 186 | 12 | 11 | 69.38  | b1b6y1y2y6y7y8°y8y9y10y12                                       | 1371.57 | 32.026  | 81975   | 2 | 686.29  | 0.18   |
| P02768 ALBU_HUMAN Serum albumin                         | 8  |                                            | FQNALLVR                            | 426 | 8  | 6  | 49.64  | b5y2y3y4y6y8                                                    | 960.55  | 55.732  | 81656   | 2 | 480.78  | -9.47  |
| P02768 ALBU_HUMAN Serum albumin                         | 9  | Carbamidomethyl+C(14)                      | ALVLIIFAQYLQCCPFEDHVK               | 44  | 21 | 21 | 155.23 | b2b3b4b5b6y2y3y4y5y7 °y7y8°y8y10°y10°y10y12y13y15y19y21         | 2490.28 | 108.698 | 80281   | 3 | 830.77  | 0.00   |

|                                 |    |                                                                         |                        |     |    |    |        |                                                                                                |         |         |         |   |         |        |
|---------------------------------|----|-------------------------------------------------------------------------|------------------------|-----|----|----|--------|------------------------------------------------------------------------------------------------|---------|---------|---------|---|---------|--------|
| P02768 ALBU_HUMAN Serum albumin | 10 |                                                                         | AEFAEVSK               | 249 | 8  | 9  | 51.4   | b2b3°b3b4b8°b8y4y6y8                                                                           | 880.44  | 33.539  | 73926   | 2 | 440.72  | -2.98  |
| P02768 ALBU_HUMAN Serum albumin | 11 | Carbamidomethyl+C(2)                                                    | LCTVATLR               | 97  | 8  | 4  | 41.1   | y3y4y6y8                                                                                       | 933.52  | 43.859  | 28569   | 2 | 467.26  | -2.09  |
| P02768 ALBU_HUMAN Serum albumin | 12 | Carbamidomethyl+C(2);<br>Carbamidomethyl+C(11)                          | TCVADESAENCDK          | 75  | 13 | 9  | 79.49  | b2b6°b6y5y6y8y9y10y11                                                                          | 1498.58 | 22.579  | 24510   | 2 | 749.79  | 2.20   |
| P02768 ALBU_HUMAN Serum albumin | 13 | Carbamidomethyl+C(1);<br>Carbamidomethyl+C(2);<br>Carbamidomethyl+C(10) | CCAAADPHECYAK          | 383 | 13 | 6  | 32.59  | b1b3y6y7y9y13                                                                                  | 1552.59 | 24.806  | 12111   | 3 | 518.20  | -6.21  |
| P02768 ALBU_HUMAN Serum albumin | 14 | Carbamidomethyl+C(5);<br>Carbamidomethyl+C(6);<br>Carbamidomethyl+C(13) | VHTECCHGDLLCADDR       | 264 | 17 | 5  | 16.48  | b1b3°b3b12y11                                                                                  | 2086.85 | 40.687  | 7019    | 3 | 696.29  | 5.03   |
| P02768 ALBU_HUMAN Serum albumin | 15 | Carbamidomethyl+C(14)                                                   | EFNAETFTFHADICTLSEKER  | 524 | 21 | 3  | 20.65  | b4b11b16                                                                                       | 2545.14 | 73.012  | 3306    | 2 | 1273.07 | -10.17 |
| P02768 ALBU_HUMAN Serum albumin | 16 | Carbamidomethyl+C(7)                                                    | ADDKETCFAEEGK          | 584 | 13 | 4  | 20.83  | b4y4y9y13                                                                                      | 1499.61 | 29.550  | 2577    | 3 | 500.54  | -11.64 |
| P02768 ALBU_HUMAN Serum albumin | 17 |                                                                         | LVTDLTK                | 257 | 7  | 12 | 93.92  | b3°b3b4°b4b5b6y4°y4y5°y5y6°y6                                                                  | 789.46  | 38.914  | 919470  | 2 | 395.23  | -19.02 |
| P02768 ALBU_HUMAN Serum albumin | 18 |                                                                         | AVMDDFAAFVEK           | 569 | 12 | 3  | 22.48  | b6y5y10                                                                                        | 1342.64 | 82.555  | 130984  | 2 | 671.82  | 1.55   |
| P02768 ALBU_HUMAN Serum albumin | 19 | Carbamidomethyl+C(3)                                                    | RPCFSALEVDETYVVK       | 508 | 16 | 3  | 17.33  | b12b14y12                                                                                      | 1910.93 | 65.730  | 34193   | 3 | 637.65  | -0.77  |
| P02768 ALBU_HUMAN Serum albumin | 20 | Carbamidomethyl+C(3)                                                    | AACLLPK                | 198 | 7  | 3  | 40.71  | b3b4b6                                                                                         | 772.43  | 42.201  | 31101   | 2 | 386.72  | -12.72 |
| P02768 ALBU_HUMAN Serum albumin | 21 |                                                                         | LYYEIAR                | 161 | 7  | 4  | 51     | b5y3y5y6                                                                                       | 927.49  | 80.042  | 30183   | 2 | 464.25  | -2.04  |
| P02768 ALBU_HUMAN Serum albumin | 22 |                                                                         | HPYFYAPELFFAK          | 169 | 14 | 7  | 51.14  | b3b7y4y8y9y11°y11                                                                              | 1742.87 | 63.022  | 19224   | 3 | 581.63  | -14.64 |
| P02768 ALBU_HUMAN Serum albumin | 23 |                                                                         | SEVAHR                 | 28  | 6  | 1  | 13.7   | y3                                                                                             | 698.35  | 30.929  | 6121    | 2 | 349.68  | -13.37 |
| P02768 ALBU_HUMAN Serum albumin | 24 | Carbamidomethyl+C(3);<br>Carbamidomethyl+C(16)                          | MPCAEDYLSVVLNQLCVLHEK  | 469 | 21 | 6  | 30.06  | b12b17y4y5°y5y19                                                                               | 2518.21 | 114.951 | 2839    | 3 | 840.08  | -0.10  |
| P02768 ALBU_HUMAN Serum albumin | 25 | Carbamidomethyl+C(14)                                                   | EFNAETFTFHADICTLSEK    | 524 | 19 | 6  | 36.52  | b4°b4y9y10°y10y11                                                                              | 2260.06 | 110.413 | 1791    | 3 | 754.03  | 16.74  |
| P02768 ALBU_HUMAN Serum albumin | 26 |                                                                         | KVPQVSTPTLVEVSR        | 437 | 15 | 33 | 225.66 | b4°b4b5°b5b7°b7°b7b9°b9b10°b10b11y3y4°y4y5°y5y6y7y8°y8y9°y9y10°y10y11°y11y12°y12°y12y13°y13y14 | 1639.93 | 55.699  | 1605450 | 3 | 547.31  | -5.58  |
| P02768 ALBU_HUMAN Serum albumin | 27 |                                                                         | FKDLGEEENFK            | 34  | 10 | 3  | 27.12  | b9y5y9                                                                                         | 1226.61 | 68.287  | 493702  | 2 | 613.81  | 1.59   |
| P02768 ALBU_HUMAN Serum albumin | 28 |                                                                         | EQLKAVMDDFAAFVEK       | 565 | 16 | 3  | 17.33  | b4b10y9                                                                                        | 1840.91 | 61.150  | 84417   | 3 | 614.31  | -2.12  |
| P02768 ALBU_HUMAN Serum albumin | 29 | Carbamidomethyl+C(4);<br>Carbamidomethyl+C(17)                          | RMPCAEDYLSVVLNQLCVLHEK | 468 | 22 | 7  | 33.41  | b5b7b12y6y9y11°y11                                                                             | 2674.32 | 104.009 | 64129   | 3 | 892.11  | 1.83   |
| P02768 ALBU_HUMAN Serum albumin | 30 |                                                                         | LYYEIARR               | 161 | 8  | 4  | 41.1   | b4b5b6°b6                                                                                      | 1083.58 | 62.919  | 21219   | 2 | 542.30  | -10.25 |
| P02768 ALBU_HUMAN Serum albumin | 31 | Carbamidomethyl+C(5);<br>Carbamidomethyl+C(6);<br>Carbamidomethyl+C(13) | VHTECCHGDLLCADDRADLAK  | 264 | 22 | 4  | 21.08  | b3y10y13y19                                                                                    | 2585.14 | 44.221  | 17511   | 3 | 862.38  | 7.27   |
| P02768 ALBU_HUMAN Serum albumin | 32 |                                                                         | DAHKSEVAHR             | 24  | 10 | 4  | 34.11  | b3°b3b5b6                                                                                      | 1149.58 | 38.479  | 4821    | 2 | 575.29  | 4.67   |

|                                    |    |                                              |                          |     |    |    |        |                                                                                                |         |         |        |   |         |        |
|------------------------------------|----|----------------------------------------------|--------------------------|-----|----|----|--------|------------------------------------------------------------------------------------------------|---------|---------|--------|---|---------|--------|
| P02768 ALBU_HUMAN Serum albumin    | 33 |                                              | RHPYFYAPELLFFAK          | 168 | 15 | 3  | 24.34  | b8b9y10                                                                                        | 1898.97 | 53.605  | 4737   | 3 | 633.66  | -12.21 |
| P02768 ALBU_HUMAN Serum albumin    | 34 | Carbamidomethyl+C(3)                         | NECFLQHKDDNPNLPR         | 122 | 16 | 3  | 23.86  | b13b14y10                                                                                      | 1996.95 | 91.622  | 1521   | 3 | 666.32  | 12.10  |
| P02768 ALBU_HUMAN Serum albumin    | 35 | Carbamidomethyl+C(14);<br>Phosphoryl STY(10) | ALVLIIFAQYLQCPFEDHVK     | 44  | 21 | 6  | 39.9   | y3y7y10y11*y11y18                                                                              | 2570.26 | 129.208 | 4086   | 3 | 857.43  | 8.74   |
| P02768 ALBU_HUMAN Serum albumin    | 36 | Carbamidomethyl+C(3);<br>Phosphoryl STY(5)   | RPCFSALEVDETYVVK         | 508 | 16 | 3  | 23.86  | b3b4_HPO3 b4y3                                                                                 | 1990.91 | 67.715  | 3079   | 3 | 664.31  | 10.18  |
| P02768 ALBU_HUMAN Serum albumin    | 37 | Oxidation+M(6)                               | DVFLGMFLYEYAR            | 347 | 13 | 4  | 29.95  | b6b12y5y7                                                                                      | 1639.78 | 67.763  | 16762  | 2 | 820.39  | -0.67  |
| P02768 ALBU_HUMAN Serum albumin    | 38 |                                              | LVNEVTEF                 | 65  | 8  | 0  | 1.98   |                                                                                                | 950.48  | 54.867  | 112471 | 2 | 475.74  | -8.03  |
| P02768 ALBU_HUMAN Serum albumin    | 39 | Carbamidomethyl+C(5)                         | DLLECADDR                | 272 | 9  | 0  | 4.76   |                                                                                                | 1106.48 | 40.603  | 5026   | 1 | 1106.48 | -0.88  |
| P02768 ALBU_HUMAN Serum albumin    | 40 |                                              | AEFAEVSK                 | 249 | 8  | 0  | 1.19   |                                                                                                | 862.43  | 33.556  | 10860  | 1 | 862.43  | 3.40   |
| O43707 ACTN4_HUMAN Alpha-actinin-4 | 1  |                                              | VGWEQLLTTIAR             | 733 | 12 | 20 | 172.72 | b1b3b4b5°b5b6b7b8y1y2y3y4°y4y5y6y7y8*y8y9y12                                                   | 1386.77 | 98.342  | 323880 | 2 | 693.89  | -3.79  |
| O43707 ACTN4_HUMAN Alpha-actinin-4 | 2  |                                              | AIMTYVSSFYHAFSGAQK       | 255 | 18 | 33 | 205.77 | b2b5°b5b6b8b14y1y2*y2y4*y4y5y6°y6y7y8*y8y9y10°y10y11°y11*y11y12°y12y13*y13y14°y14y15y16°y16y18 | 2007.95 | 90.892  | 169842 | 3 | 669.99  | -5.71  |
| O43707 ACTN4_HUMAN Alpha-actinin-4 | 3  |                                              | TINEVENQILTR             | 745 | 12 | 5  | 32.69  | b12y3y6y10y12                                                                                  | 1429.77 | 60.230  | 104115 | 2 | 715.39  | 6.40   |
| O43707 ACTN4_HUMAN Alpha-actinin-4 | 4  |                                              | ALDFIASK                 | 114 | 8  | 9  | 64.7   | b3b4b5y2°y2y5y6°y6y8                                                                           | 864.48  | 55.656  | 81860  | 2 | 432.74  | -6.28  |
| O43707 ACTN4_HUMAN Alpha-actinin-4 | 5  |                                              | LASDLLEWIR               | 300 | 10 | 7  | 61.51  | b4y2y3y4y8y9y10                                                                                | 1215.67 | 92.322  | 80803  | 2 | 608.34  | -4.62  |
| O43707 ACTN4_HUMAN Alpha-actinin-4 | 6  | Carbamidomethyl+C(10)                        | ELPPDQAEYCIAR            | 869 | 13 | 6  | 28.31  | y6°y6y7y11°y11*y11                                                                             | 1561.73 | 50.584  | 8052   | 2 | 781.37  | 0.47   |
| O43707 ACTN4_HUMAN Alpha-actinin-4 | 7  |                                              | HTNYTMEHIR               | 723 | 10 | 4  | 34.11  | b2y6y7y9                                                                                       | 1301.59 | 37.675  | 3792   | 2 | 651.30  | -9.66  |
| O43707 ACTN4_HUMAN Alpha-actinin-4 | 8  |                                              | VLAVNQENEHLMEDYEK        | 283 | 17 | 4  | 16.48  | b10*b10y7y16                                                                                   | 2060.96 | 69.609  | 61230  | 2 | 1030.98 | 1.30   |
| O43707 ACTN4_HUMAN Alpha-actinin-4 | 9  |                                              | ASIHEAWTDGK              | 421 | 11 | 4  | 24.51  | b6°b6y4y8                                                                                      | 1214.57 | 38.397  | 42706  | 3 | 405.53  | -11.26 |
| O43707 ACTN4_HUMAN Alpha-actinin-4 | 10 |                                              | DDPVTNLNNAFEVAEK         | 217 | 16 | 3  | 17.33  | b11y3y7                                                                                        | 1775.82 | 52.238  | 31567  | 3 | 592.61  | -13.34 |
| O43707 ACTN4_HUMAN Alpha-actinin-4 | 11 |                                              | INNVNK                   | 108 | 6  | 1  | 13.7   | y5                                                                                             | 701.40  | 60.860  | 20249  | 1 | 701.40  | 9.66   |
| O43707 ACTN4_HUMAN Alpha-actinin-4 | 12 |                                              | VEQIAAIAQELNELDYDShNVNTR | 469 | 25 | 3  | 22.99  | b4b5b10                                                                                        | 2905.42 | 119.498 | 11912  | 3 | 969.14  | 6.55   |
| O43707 ACTN4_HUMAN Alpha-actinin-4 | 13 |                                              | HEAFESDLAAHQDR           | 455 | 14 | 3  | 19.47  | b4b10y9                                                                                        | 1625.74 | 71.464  | 9153   | 2 | 813.37  | 3.38   |
| O43707 ACTN4_HUMAN Alpha-actinin-4 | 14 | Carbamidomethyl+C(2)                         | ICDQWDALGSLTHSR          | 497 | 15 | 4  | 29.7   | b7y4y10y14                                                                                     | 1758.81 | 69.619  | 8741   | 3 | 586.94  | -6.52  |
| O43707 ACTN4_HUMAN Alpha-actinin-4 | 15 |                                              | MLDAEDIVNTARPDEK         | 239 | 16 | 4  | 24.52  | b8b12y4y8                                                                                      | 1816.85 | 58.876  | 8475   | 2 | 908.93  | -11.42 |
| O43707 ACTN4_HUMAN Alpha-actinin-4 | 16 |                                              | SFSTALYGESDL             | 899 | 12 | 3  | 26.46  | b9y4y5                                                                                         | 1289.61 | 72.112  | 7416   | 1 | 1289.61 | 14.77  |
| O43707 ACTN4_HUMAN Alpha-actinin-4 | 17 |                                              | DHGGALGPEEFK             | 779 | 12 | 5  | 22.48  | b6°b6b8y5°y5                                                                                   | 1256.57 | 81.589  | 4872   | 1 | 1256.57 | -14.09 |
| O43707 ACTN4_HUMAN Alpha-actinin-4 | 18 |                                              | FAIQDISVEETSAK           | 152 | 14 | 3  | 19.47  | b13y6y13                                                                                       | 1537.74 | 58.787  | 4815   | 2 | 769.38  | -19.21 |

|                                           |    |                       |                                |     |    |    |        |                                        |         |         |        |   |         |        |
|-------------------------------------------|----|-----------------------|--------------------------------|-----|----|----|--------|----------------------------------------|---------|---------|--------|---|---------|--------|
| O43707 ACTN4_HUMAN Alpha-actinin-4        | 19 | Carbamidomethyl+C(2)  | ACLISLGYDVENDR                 | 791 | 14 | 4  | 24.91  | b4y11y12°y12                           | 1624.77 | 63.005  | 4721   | 4 | 406.95  | 5.79   |
| O43707 ACTN4_HUMAN Alpha-actinin-4        | 20 | Carbamidomethyl+C(6)  | TFTAWCNShLR                    | 54  | 11 | 6  | 48.11  | b4b10y3y9°y9y10                        | 1392.65 | 58.999  | 2673   | 3 | 464.89  | 0.96   |
| O43707 ACTN4_HUMAN Alpha-actinin-4        | 21 |                       | IMSLVDPNHSLGVTQAFIDFMSR        | 813 | 24 | 6  | 41.71  | b3b8b9b10y10y15                        | 2725.35 | 119.694 | 1695   | 3 | 909.12  | 1.43   |
| O43707 ACTN4_HUMAN Alpha-actinin-4        | 22 |                       | MOPYQGPDVPGALDYK               | 882 | 17 | 3  | 25.13  | b8b15b16                               | 1792.85 | 70.360  | 1568   | 2 | 896.93  | -4.02  |
| O43707 ACTN4_HUMAN Alpha-actinin-4        | 23 |                       | AGTQIENIDEDFR                  | 66  | 13 | 9  | 43.46  | b7°b7*b7b12y3y10°y10y12°y12            | 1507.72 | 90.116  | 1508   | 2 | 754.36  | 8.58   |
| O43707 ACTN4_HUMAN Alpha-actinin-4        | 24 |                       | KDDPVTNLNNAFEVAEK              | 216 | 17 | 3  | 23.88  | y3y6y15                                | 1903.93 | 71.401  | 36611  | 3 | 635.31  | -6.60  |
| O43707 ACTN4_HUMAN Alpha-actinin-4        | 25 |                       | ASIHEAWTDGKEAMLK               | 421 | 16 | 6  | 35.78  | b9b12y10°y10y11y15                     | 1786.90 | 71.204  | 28349  | 3 | 596.31  | 12.64  |
| O43707 ACTN4_HUMAN Alpha-actinin-4        | 26 |                       | LSNRPAFMPSEGMVSDINNGWQHLEQAQEK | 365 | 30 | 11 | 26.69  | b3b6°b6*b6y4*y4y6°y6y9°y9y11           | 3413.64 | 119.652 | 7845   | 4 | 854.17  | 0.50   |
| O43707 ACTN4_HUMAN Alpha-actinin-4        | 27 |                       | LRLSNRPAFMPSEGK                | 363 | 15 | 4  | 38.1   | b13b14y11y12                           | 1702.93 | 91.657  | 6827   | 3 | 568.31  | 13.62  |
| O43707 ACTN4_HUMAN Alpha-actinin-4        | 28 | Carbamidomethyl+C(7)  | KTFTAWCNShLR                   | 53  | 12 | 4  | 22.48  | b10°b10y5y10                           | 1520.76 | 67.079  | 6226   | 3 | 507.59  | 12.28  |
| O43707 ACTN4_HUMAN Alpha-actinin-4        | 29 |                       | MEEIGRISIEMNGTLEDQLShLK        | 668 | 23 | 3  | 13.16  | b7b12y8                                | 2643.33 | 74.031  | 6002   | 4 | 661.59  | 6.65   |
| O43707 ACTN4_HUMAN Alpha-actinin-4        | 30 | Carbamidomethyl+C(14) | DHGGALGPEEFKACLISLGYDVENDR     | 779 | 26 | 4  | 22.98  | b3b6b7y12                              | 2862.32 | 94.884  | 5528   | 3 | 954.78  | -6.57  |
| O43707 ACTN4_HUMAN Alpha-actinin-4        | 31 |                       | DAKGISQEQMQEFR                 | 757 | 14 | 7  | 31.8   | b4b10°b10*b10b12*b12y6                 | 1666.80 | 44.212  | 5008   | 4 | 417.46  | 8.50   |
| O43707 ACTN4_HUMAN Alpha-actinin-4        | 32 |                       | MVSDINNGWQHLEQAQEKGYEEWLLNEIR  | 378 | 28 | 4  | 11.78  | b5y5°y5y10                             | 3401.62 | 130.676 | 4820   | 3 | 1134.54 | -0.50  |
| O43707 ACTN4_HUMAN Alpha-actinin-4        | 33 |                       | AIMTYVSSFYHAFSGAQKAETAANR      | 255 | 25 | 10 | 48.17  | b4b8°b8b9°b9b24y10y13y14y22            | 2721.29 | 103.977 | 4442   | 3 | 907.77  | -7.72  |
| O43707 ACTN4_HUMAN Alpha-actinin-4        | 34 |                       | AGTQIENIDEDFRDGLK              | 66  | 17 | 4  | 33.96  | b6b9b13b14                             | 1920.92 | 75.343  | 3795   | 2 | 960.96  | -5.27  |
| O43707 ACTN4_HUMAN Alpha-actinin-4        | 35 |                       | MOPYQGPDVPGALDYKSFSTALYGESDL   | 882 | 29 | 4  | 14.67  | b5b14y8y13                             | 3063.40 | 52.309  | 3789   | 3 | 1021.81 | -8.05  |
| O43707 ACTN4_HUMAN Alpha-actinin-4        | 36 | Oxidation+M(8)        | LSNRPAFMPSEGK                  | 365 | 13 | 8  | 29.95  | b3°b3*b3b11°b11y5y11°y11               | 1449.73 | 60.323  | 24760  | 3 | 483.91  | 8.59   |
| O43707 ACTN4_HUMAN Alpha-actinin-4        | 37 | Oxidation+M(7)        | GISQEQMQEFR                    | 760 | 11 | 3  | 27.52  | b3b4y9                                 | 1368.60 | 24.197  | 4332   | 2 | 684.80  | -14.27 |
| Q9BQE3 TBA1C_HUMAN Tubulin alpha-1C chain | 1  |                       | QLFHPEQLITGKEDAANNYAR          | 84  | 21 | 8  | 53.21  | y3y5y6y9y10y12y21*y21                  | 2415.18 | 62.326  | 354393 | 4 | 604.55  | -8.79  |
| Q9BQE3 TBA1C_HUMAN Tubulin alpha-1C chain | 2  |                       | VGINYQPPTVVPGDLAK              | 352 | 18 | 15 | 69.5   | b1b5°b5b6°b6b10b11°b11y1y2y3y7y8y12y18 | 1825.00 | 66.011  | 249834 | 2 | 913.00  | 5.75   |
| Q9BQE3 TBA1C_HUMAN Tubulin alpha-1C chain | 3  |                       | AVFVDLEPTVIDEVR                | 64  | 15 | 14 | 124.08 | b3b5b7b14y2y3y4°y4y5y8y10y11y13y15     | 1701.91 | 84.661  | 166039 | 2 | 851.46  | 3.44   |
| Q9BQE3 TBA1C_HUMAN Tubulin alpha-1C chain | 4  |                       | NLDIERPTYTLNR                  | 215 | 14 | 11 | 40.18  | b2°b2b3b5°b5y7y10*y10y12°y12y14        | 1718.87 | 52.991  | 135862 | 3 | 573.63  | -8.45  |
| Q9BQE3 TBA1C_HUMAN Tubulin alpha-1C chain | 5  |                       | IHFPLATYAPVISAQEK              | 264 | 16 | 5  | 17.33  | b2b3b8y2y4                             | 1756.94 | 78.557  | 95386  | 3 | 586.32  | -12.65 |
| Q9BQE3 TBA1C_HUMAN Tubulin alpha-1C chain | 6  |                       | EDMAALEK                       | 422 | 8  | 7  | 54.41  | y1y2y3y4y5y7y8                         | 906.42  | 36.796  | 59905  | 2 | 453.72  | 0.54   |
| Q9BQE3 TBA1C_HUMAN Tubulin alpha-1C chain | 7  |                       | LSVDYGKK                       | 156 | 8  | 6  | 54.41  | b2y3y4y5y7y8                           | 909.50  | 29.936  | 32828  | 2 | 455.25  | -9.13  |
| Q9BQE3 TBA1C_HUMAN Tubulin alpha-1C chain | 8  |                       | FDGALNVDLTEFQTNLVPYPR          | 243 | 21 | 13 | 76.54  | b2b3b4b17y2y3y4y5y6y11*y11y14y21       | 2409.23 | 95.114  | 30203  | 2 | 1205.12 | 7.40   |
| Q9BQE3 TBA1C_HUMAN Tubulin alpha-1C chain | 9  |                       | LISQIVSSITASLR                 | 229 | 14 | 4  | 27.84  | b4b6y4y8                               | 1487.89 | 100.447 | 13968  | 2 | 744.45  | 5.17   |

|                                            |    |                                         |                              |      |    |    |        |                                                                                      |         |         |        |   |         |        |
|--------------------------------------------|----|-----------------------------------------|------------------------------|------|----|----|--------|--------------------------------------------------------------------------------------|---------|---------|--------|---|---------|--------|
| [Q9BQE3]TBA1C_HUMAN Tubulin alpha-1C chain | 10 |                                         | EIIDLVLDR                    | 112  | 9  | 4  | 30.71  | b4b5*b5y3                                                                            | 1085.62 | 79.800  | 46756  | 2 | 543.31  | -0.34  |
| [Q9BQE3]TBA1C_HUMAN Tubulin alpha-1C chain | 11 | Carbamidomethyl+C(15)                   | AYHEQLTVAEITNACFEPANQMV<br>K | 280  | 24 | 4  | 26.35  | b7b8y6y11                                                                            | 2764.27 | 96.104  | 2478   | 3 | 922.10  | -11.57 |
| [Q9BQE3]TBA1C_HUMAN Tubulin alpha-1C chain | 12 | Carbamidomethyl+C(9)                    | RTIQFVDWCPTGFK               | 338  | 14 | 5  | 40.18  | b8b13y6y9y11                                                                         | 1754.86 | 57.065  | 46507  | 3 | 585.62  | -7.44  |
| [Q9BQE3]TBA1C_HUMAN Tubulin alpha-1C chain | 13 | Carbamidomethyl+C(3)                    | AVCMLSNTTAVAEAWARLDHK        | 373  | 21 | 4  | 23.66  | b11*b11b14b15                                                                        | 2344.12 | 100.343 | 6133   | 4 | 586.79  | -13.96 |
| [Q9BQE3]TBA1C_HUMAN Tubulin alpha-1C chain | 14 | Carbamidomethyl+C(3);<br>Oxidation+M(4) | AVCMLSNTTAVAEAWAR            | 373  | 17 | 3  | 23.47  | b13y9y10                                                                             | 1866.90 | 59.072  | 31592  | 2 | 933.96  | 11.12  |
| [P35749]MYH11_HUMAN Myosin-11              | 1  |                                         | QLLQANPILEAFGNAK             | 216  | 16 | 27 | 172.05 | b2*b2b3*b3b4*b4b6*b<br>6b16y2y4*y4y5y6y7*y7<br>*y7y8y9y10y11y12*y12<br>y13*y13y14y16 | 1726.95 | 91.678  | 177915 | 2 | 863.98  | 1.70   |
| [P35749]MYH11_HUMAN Myosin-11              | 2  |                                         | TQLEELEDELQATEDAK            | 1545 | 17 | 10 | 70.57  | b5b11y2y4y5y6y9y13y1<br>4y17                                                         | 1961.93 | 79.380  | 104005 | 2 | 981.47  | 7.72   |
| [P35749]MYH11_HUMAN Myosin-11              | 3  |                                         | KEEELQAALAR                  | 1087 | 11 | 11 | 99.78  | b3b6b8y2y4y5y8y9y10*<br>y10y11                                                       | 1257.68 | 42.992  | 50445  | 2 | 629.34  | -3.30  |
| [P35749]MYH11_HUMAN Myosin-11              | 4  | Carbamidomethyl+C(1)                    | CNGVLEGIR                    | 700  | 9  | 6  | 53.55  | b8y13y5y7y9                                                                          | 1017.51 | 49.223  | 41562  | 2 | 509.26  | -4.50  |
| [P35749]MYH11_HUMAN Myosin-11              | 5  |                                         | DLGEELEALK                   | 1142 | 10 | 3  | 27.12  | b9y3y8                                                                               | 1116.58 | 72.979  | 35399  | 2 | 558.79  | 3.17   |
| [P35749]MYH11_HUMAN Myosin-11              | 6  |                                         | NTDQASMPDNTAAQK              | 365  | 15 | 5  | 26.4   | y8y10y11y15*y15                                                                      | 1591.71 | 27.134  | 32526  | 2 | 796.36  | 3.22   |
| [P35749]MYH11_HUMAN Myosin-11              | 7  |                                         | IAQLEEQVEQEAR                | 1822 | 13 | 3  | 35.3   | y9y10y11                                                                             | 1542.79 | 79.689  | 32367  | 2 | 771.90  | 5.93   |
| [P35749]MYH11_HUMAN Myosin-11              | 8  |                                         | LQQLFNHTMFILEQEEYQR          | 482  | 19 | 5  | 22.04  | y3*y3y5*y5y7                                                                         | 2467.24 | 102.772 | 4714   | 2 | 1234.12 | 11.97  |
| [P35749]MYH11_HUMAN Myosin-11              | 9  |                                         | LQNEVESVTGMLENAEAGK          | 1284 | 18 | 5  | 26.82  | b11y7y8y14*y14                                                                       | 1947.96 | 86.954  | 2885   | 2 | 974.48  | 12.91  |
| [P35749]MYH11_HUMAN Myosin-11              | 10 |                                         | TELEDTLDSTATQQLR             | 1152 | 17 | 4  | 16.48  | b5b8y10y17                                                                           | 1949.95 | 123.744 | 2461   | 2 | 975.48  | 12.40  |
| [P35749]MYH11_HUMAN Myosin-11              | 11 |                                         | NMDPLNDNVTSLLNASSDK          | 594  | 19 | 3  | 24.26  | y5y12y13                                                                             | 2047.96 | 110.043 | 1602   | 3 | 683.33  | 2.32   |
| [P35749]MYH11_HUMAN Myosin-11              | 12 |                                         | SHEAQVQEMR                   | 1188 | 10 | 8  | 52.94  | b5*b5b6*b6b9y3y6*y6                                                                  | 1214.57 | 41.094  | 960149 | 2 | 607.79  | 10.15  |
| [P35749]MYH11_HUMAN Myosin-11              | 13 |                                         | ALELDPNLYR                   | 752  | 10 | 5  | 28.89  | b8b9*b9y6*y6                                                                         | 1203.62 | 32.000  | 125691 | 2 | 602.31  | -16.53 |
| [P35749]MYH11_HUMAN Myosin-11              | 14 |                                         | NLLQEQQAETELYAEAEEMR         | 889  | 21 | 6  | 27.05  | b5*b5b12b16y4y10                                                                     | 2508.21 | 99.391  | 81705  | 3 | 836.74  | 6.62   |
| [P35749]MYH11_HUMAN Myosin-11              | 15 | Carbamidomethyl+C(12)                   | ITDVIMAFQAMCR                | 785  | 13 | 3  | 20.83  | b4b11y9                                                                              | 1555.76 | 80.362  | 47362  | 2 | 778.38  | 10.20  |
| [P35749]MYH11_HUMAN Myosin-11              | 16 |                                         | FDQLLAEEK                    | 1452 | 9  | 4  | 30.71  | b4y5y8*y8                                                                            | 1092.55 | 50.581  | 31660  | 2 | 546.78  | -3.24  |
| [P35749]MYH11_HUMAN Myosin-11              | 17 | Carbamidomethyl+C(9)                    | VEDMAELTCLNEASVLHNL          | 86   | 20 | 4  | 14.51  | b7*b7y3y13                                                                           | 2314.09 | 80.379  | 22571  | 2 | 1157.55 | -12.66 |
| [P35749]MYH11_HUMAN Myosin-11              | 18 |                                         | MTESSLPSASK                  | 633  | 11 | 3  | 24.51  | b10y5y9                                                                              | 1137.55 | 47.287  | 18237  | 2 | 569.28  | 4.08   |
| [P35749]MYH11_HUMAN Myosin-11              | 19 |                                         | ENADLAGELR                   | 1231 | 10 | 3  | 34.11  | b4b5b9                                                                               | 1087.56 | 46.302  | 17529  | 2 | 544.28  | 18.41  |
| [P35749]MYH11_HUMAN Myosin-11              | 20 |                                         | LEDEILVMDDQNNK               | 982  | 14 | 4  | 27.84  | b8b11y10y13                                                                          | 1675.82 | 77.356  | 12971  | 2 | 838.41  | 19.30  |
| [P35749]MYH11_HUMAN Myosin-11              | 21 |                                         | EIENLTQQYEEK                 | 1399 | 12 | 5  | 40.55  | b3y4y5*y5y6                                                                          | 1523.73 | 88.713  | 12466  | 2 | 762.37  | 2.96   |
| [P35749]MYH11_HUMAN Myosin-11              | 22 |                                         | EELAEELASSLSGR               | 1710 | 14 | 3  | 19.47  | b3b12y9                                                                              | 1490.74 | 111.972 | 11201  | 2 | 745.87  | 2.70   |
| [P35749]MYH11_HUMAN Myosin-11              | 23 |                                         | TEFSIIHYAGK                  | 572  | 11 | 5  | 36.27  | b3*b3b6*b6b8                                                                         | 1265.65 | 42.367  | 6903   | 2 | 633.33  | -3.18  |

|                              |    |                       |                                  |      |    |    |       |                              |         |         |        |   |         |        |
|------------------------------|----|-----------------------|----------------------------------|------|----|----|-------|------------------------------|---------|---------|--------|---|---------|--------|
| P35749 MYH11_HUMAN Myosin-11 | 24 |                       | ALETQMEEMK                       | 1535 | 10 | 3  | 27.12 | b3b7y4                       | 1209.56 | 57.587  | 6744   | 2 | 605.28  | 7.47   |
| P35749 MYH11_HUMAN Myosin-11 | 25 |                       | NFINSVPAQADWAAK                  | 18   | 15 | 4  | 40.95 | y3y7y8y9                     | 1631.84 | 78.613  | 6243   | 2 | 816.43  | 16.46  |
| P35749 MYH11_HUMAN Myosin-11 | 26 |                       | DVASLSSQLQDTQELLQEETR            | 1308 | 21 | 3  | 14.01 | b3y8y10                      | 2390.12 | 66.721  | 6095   | 2 | 1195.57 | -18.18 |
| P35749 MYH11_HUMAN Myosin-11 | 27 |                       | MAQQMLDLEEQLEEEEAAR              | 947  | 19 | 4  | 26.1  | b6y4y5y14                    | 2263.05 | 68.737  | 6064   | 4 | 566.52  | 13.16  |
| P35749 MYH11_HUMAN Myosin-11 | 28 | Carbamidomethyl+C(2)  | VCHLMGINVTDFTFR                  | 380  | 14 | 8  | 38.73 | b12b13°b13y12°y12*y12y13*y13 | 1662.80 | 136.699 | 5791   | 1 | 1662.80 | -3.82  |
| P35749 MYH11_HUMAN Myosin-11 | 29 |                       | SLEADLMQLQEDLAAER                | 1683 | 18 | 10 | 50.55 | b5°b5b8b10y4y5°y5y8y13°y13   | 2002.97 | 90.007  | 5679   | 3 | 668.33  | -4.45  |
| P35749 MYH11_HUMAN Myosin-11 | 30 |                       | EQADFAVEALAK                     | 414  | 12 | 3  | 32.69 | b3b6b8                       | 1291.65 | 44.987  | 5074   | 2 | 646.33  | -6.05  |
| P35749 MYH11_HUMAN Myosin-11 | 31 |                       | QELEEILHEMEAR                    | 917  | 13 | 5  | 25.6  | b3b4°b4y12°y12               | 1626.75 | 81.587  | 5035   | 1 | 1626.75 | -15.46 |
| P35749 MYH11_HUMAN Myosin-11 | 32 |                       | ELEDAR                           | 1659 | 6  | 1  | 13.7  | b3                           | 732.35  | 62.580  | 4946   | 1 | 732.35  | -3.75  |
| P35749 MYH11_HUMAN Myosin-11 | 33 |                       | SMLQDR                           | 163  | 6  | 2  | 27.01 | b4y3                         | 749.36  | 100.210 | 4294   | 1 | 749.36  | -2.20  |
| P35749 MYH11_HUMAN Myosin-11 | 34 |                       | HEMPPHIYAIADTAYR                 | 147  | 16 | 8  | 60.47 | b5b8°b8b10b12y3y5y6          | 1884.93 | 47.779  | 3284   | 3 | 628.98  | 12.37  |
| P35749 MYH11_HUMAN Myosin-11 | 35 | Carbamidomethyl+C(26) | QGASFLGILDIAQFEIFEVNSFEQLCINYTEK | 449  | 33 | 3  | 22.23 | b7y9y10                      | 3766.89 | 129.813 | 3063   | 3 | 1256.30 | 15.36  |
| P35749 MYH11_HUMAN Myosin-11 | 36 |                       | DFQR                             | 1655 | 4  | 1  | 12.91 | b3                           | 565.28  | 68.237  | 2792   | 1 | 565.28  | 11.12  |
| P35749 MYH11_HUMAN Myosin-11 | 37 |                       | ATQQAQELSNELATER                 | 1761 | 16 | 9  | 49.21 | b5°b5b11b13b15°b15y4y8*y8    | 1788.84 | 98.338  | 1917   | 2 | 894.92  | -20.20 |
| P35749 MYH11_HUMAN Myosin-11 | 38 |                       | QEVEHK                           | 1247 | 6  | 1  | 13.7  | b5                           | 769.38  | 74.156  | 1801   | 2 | 385.19  | -2.06  |
| P35749 MYH11_HUMAN Myosin-11 | 39 |                       | HAQAVEELTEQLEQFK                 | 1200 | 16 | 5  | 17.33 | b8°b8b12y7*y7                | 1899.93 | 99.229  | 1711   | 2 | 950.47  | -6.23  |
| P35749 MYH11_HUMAN Myosin-11 | 40 |                       | TEFSIIHYAGKVDYNASAWLTK           | 572  | 22 | 8  | 25.89 | b5°b5b9b21y9y13°y13*y13      | 2514.24 | 100.327 | 610527 | 3 | 838.75  | -8.74  |
| P35749 MYH11_HUMAN Myosin-11 | 41 |                       | NLLQEQLQAETELYAEAEEMRVR          | 889  | 23 | 4  | 13.16 | b3y9°y9y11                   | 2763.36 | 73.329  | 149291 | 3 | 921.79  | -1.86  |
| P35749 MYH11_HUMAN Myosin-11 | 42 | Carbamidomethyl+C(9)  | GFMDGKQACILMIK                   | 738  | 14 | 3  | 28.04 | y3y8y11                      | 1611.79 | 80.490  | 65034  | 2 | 806.40  | -9.09  |
| P35749 MYH11_HUMAN Myosin-11 | 43 |                       | ELEKHSQLTEEK                     | 876  | 13 | 4  | 25.6  | b12y7y8°y8                   | 1598.81 | 85.001  | 60138  | 2 | 799.91  | 5.80   |
| P35749 MYH11_HUMAN Myosin-11 | 44 | Carbamidomethyl+C(12) | LEAQVQELQSKCSDGER                | 1256 | 17 | 3  | 23.47 | b16y12y13                    | 1976.92 | 67.187  | 44785  | 3 | 659.64  | -9.69  |
| P35749 MYH11_HUMAN Myosin-11 | 45 |                       | ATQQAQELSNELATERSTAQK            | 1761 | 21 | 4  | 14.01 | b12°b12y17y20                | 2304.16 | 77.415  | 30516  | 2 | 1152.58 | 7.73   |
| P35749 MYH11_HUMAN Myosin-11 | 46 |                       | NISSKYADER                       | 1461 | 10 | 4  | 27.12 | b4b8°b8y6                    | 1182.58 | 55.414  | 29781  | 2 | 591.79  | 0.41   |
| P35749 MYH11_HUMAN Myosin-11 | 47 |                       | NSLQDQLDEEMEAKQNLER              | 1345 | 19 | 6  | 26.1  | b3°b3°b3b4b13y9              | 2290.07 | 90.105  | 20997  | 2 | 1145.54 | 4.80   |
| P35749 MYH11_HUMAN Myosin-11 | 48 |                       | LMTTLRNTTPNFVR                   | 663  | 14 | 4  | 27.84 | b4b8y3y5                     | 1663.91 | 116.846 | 17205  | 2 | 832.46  | 11.22  |
| P35749 MYH11_HUMAN Myosin-11 | 49 |                       | QEEEMQAKEDELQK                   | 849  | 14 | 4  | 19.47 | b3°b3b12y6                   | 1734.78 | 81.518  | 13811  | 3 | 578.93  | -4.78  |
| P35749 MYH11_HUMAN Myosin-11 | 50 |                       | AQTKEQADFAVEALAK                 | 410  | 16 | 3  | 25.7  | b4b5b10                      | 1719.90 | 63.838  | 13032  | 2 | 860.45  | 6.39   |
| P35749 MYH11_HUMAN Myosin-11 | 51 |                       | EKQAATK                          | 1835 | 7  | 4  | 40.71 | b3°b3y3y6                    | 775.44  | 63.797  | 11908  | 2 | 388.22  | 12.36  |
| P35749 MYH11_HUMAN Myosin-11 | 52 |                       | ENADLAGELRVLGQAK                 | 1231 | 16 | 4  | 40.1  | b7b10b11b12                  | 1683.89 | 74.271  | 10538  | 3 | 561.97  | -7.97  |

|                                               |    |                       |                                    |      |    |    |        |                                            |         |         |        |   |         |        |
|-----------------------------------------------|----|-----------------------|------------------------------------|------|----|----|--------|--------------------------------------------|---------|---------|--------|---|---------|--------|
| P35749 MYH11_HUMAN Myosin-11                  | 53 |                       | LEEEEDRGQQLQAER                    | 930  | 15 | 4  | 26.4   | b3b4b12°b12                                | 1829.87 | 67.203  | 6604   | 2 | 915.44  | 4.74   |
| P35749 MYH11_HUMAN Myosin-11                  | 54 |                       | FQKEIENLTQQYEEK                    | 1396 | 15 | 5  | 32.08  | b6*b6b10y4y5                               | 1926.97 | 110.306 | 6592   | 2 | 963.99  | 13.56  |
| P35749 MYH11_HUMAN Myosin-11                  | 55 |                       | DVASLSSQLQDTQELLQEETRQK            | 1308 | 23 | 3  | 13.16  | b5y6y13                                    | 2646.30 | 83.426  | 5206   | 4 | 662.33  | -9.96  |
| P35749 MYH11_HUMAN Myosin-11                  | 56 |                       | LEDEILVMDDQNNKLSK                  | 982  | 17 | 3  | 16.48  | b12y8y11                                   | 2004.01 | 78.187  | 5195   | 3 | 668.68  | 8.10   |
| P35749 MYH11_HUMAN Myosin-11                  | 57 |                       | QELEEILHEMEARLEEEEDR               | 917  | 20 | 4  | 14.51  | b4*b4b11y12                                | 2527.19 | 68.222  | 4667   | 2 | 1264.10 | 11.50  |
| P35749 MYH11_HUMAN Myosin-11                  | 58 | Carbamidomethyl+C(9)  | VEDMAELTCLNEASVLHNLRRER            | 86   | 22 | 4  | 20.08  | b11b13b15°b15                              | 2599.23 | 87.860  | 3785   | 3 | 867.08  | -13.34 |
| P35749 MYH11_HUMAN Myosin-11                  | 59 |                       | LQNEVESVTGMLNEAEGKAIK              | 1284 | 21 | 3  | 20.65  | b5b7b10                                    | 2260.12 | 37.822  | 3234   | 2 | 1130.56 | -12.75 |
| P35749 MYH11_HUMAN Myosin-11                  | 60 |                       | AKSLEADLMQLQEDLAAAER               | 1681 | 20 | 3  | 14.51  | b7b16y13                                   | 2202.13 | 81.753  | 2819   | 3 | 734.72  | 10.98  |
| P35749 MYH11_HUMAN Myosin-11                  | 61 |                       | VDYNASAWLTKNMDPLNDNVTS<br>LLNASSDK | 583  | 30 | 3  | 36.21  | b9b10b11                                   | 3296.61 | 137.763 | 2500   | 3 | 1099.54 | 10.00  |
| P35749 MYH11_HUMAN Myosin-11                  | 62 |                       | SLEADLMQLQEDLAAAERAR               | 1683 | 20 | 4  | 25.47  | b9y3y4y6                                   | 2230.13 | 32.058  | 2483   | 3 | 744.05  | 9.41   |
| P35749 MYH11_HUMAN Myosin-11                  | 63 |                       | LEVNMQALKGQFER                     | 1564 | 14 | 4  | 19.47  | b13y3y13°y13                               | 1662.86 | 62.993  | 2475   | 4 | 416.47  | -0.73  |
| P35749 MYH11_HUMAN Myosin-11                  | 64 |                       | KMAEQYK                            | 1862 | 7  | 6  | 37.7   | b4b5°b5*b5y5*y5                            | 897.44  | 90.060  | 2368   | 1 | 897.44  | -12.38 |
| P35749 MYH11_HUMAN Myosin-11                  | 65 |                       | DKTEFSIIHYAGK                      | 570  | 13 | 3  | 20.83  | b7b12y10                                   | 1508.77 | 54.590  | 2166   | 3 | 503.59  | -4.61  |
| P35749 MYH11_HUMAN Myosin-11                  | 66 | Carbamidomethyl+C(12) | ITDVIMAFQAMCRGYLAR                 | 785  | 18 | 8  | 33.07  | b3°b3b8b9°b9y10*y10y<br>12                 | 2116.05 | 117.797 | 2125   | 2 | 1058.53 | 2.08   |
| P35749 MYH11_HUMAN Myosin-11                  | 67 |                       | HEMPPHIYAIADTA YRSMLQDR            | 147  | 22 | 4  | 18.38  | b7b10y7y12                                 | 2615.25 | 54.392  | 1821   | 3 | 872.42  | -0.47  |
| P35749 MYH11_HUMAN Myosin-11                  | 68 |                       | VIENADGSEETDTRDADFNGTK             | 1946 | 23 | 5  | 13.16  | b6°b6b10y7*y7                              | 2513.11 | 120.417 | 1677   | 3 | 838.38  | 8.55   |
| P35749 MYH11_HUMAN Myosin-11                  | 69 | Phosphoryl STY()      | QADLEKEELAEELASSLSGR               | 1704 | 20 | 7  | 32.51  | b4b6°b6b7b14°b14y6_H<br>PO3 y6             | 2255.06 | 136.432 | 2983   | 2 | 1128.03 | 9.85   |
| P35749 MYH11_HUMAN Myosin-11                  | 70 | Oxidation+M(2)        | NMDPLNDNVTSLLNASSDK                | 594  | 19 | 5  | 20.93  | b15°b15b17y15y17                           | 2063.98 | 73.001  | 4360   | 2 | 1032.50 | 14.08  |
| P35749 MYH11_HUMAN Myosin-11                  | 71 | Oxidation+M(15)       | LQRELDEATESNEAMGREVNALK            | 1902 | 23 | 4  | 19.57  | b6b12°b12b14                               | 2619.27 | 57.144  | 3249   | 2 | 1310.14 | -0.28  |
| P35749 MYH11_HUMAN Myosin-11                  | 72 | Oxidation+M(12)       | ELDEATESNEAMGR                     | 1905 | 14 | 3  | 19.47  | b5y6y12                                    | 1567.67 | 53.781  | 2374   | 4 | 392.67  | 9.34   |
| P35749 MYH11_HUMAN Myosin-11                  | 73 | Oxidation+M(20)       | NLLQEQLQAETELYAEAEEMR              | 889  | 21 | 3  | 14.01  | b3b10y3                                    | 2524.20 | 103.991 | 2051   | 4 | 631.81  | 6.00   |
| Q71U36 TBA1A_HUMAN Tubulin alpha-<br>1A chain | 1  |                       | QLFHPEQLITGKEDAANNYAR              | 84   | 21 | 8  | 53.21  | y3y5y6y9y10y12y21*y2<br>1                  | 2415.18 | 62.326  | 354393 | 4 | 604.55  | -8.79  |
| Q71U36 TBA1A_HUMAN Tubulin alpha-<br>1A chain | 2  |                       | VGINYQPPTVPPGGDLAK                 | 352  | 18 | 15 | 69.5   | b1b5°b5b6°b6b10b11°b<br>11y1y2y3y7y8y12y18 | 1825.00 | 66.011  | 249834 | 2 | 913.00  | 5.75   |
| Q71U36 TBA1A_HUMAN Tubulin alpha-<br>1A chain | 3  |                       | AVFVDLEPTVIDEVR                    | 64   | 15 | 14 | 124.08 | b3b5b7b14y2y3y4°y4y5<br>y8y10y11y13y15     | 1701.91 | 84.661  | 166039 | 2 | 851.46  | 3.44   |
| Q71U36 TBA1A_HUMAN Tubulin alpha-<br>1A chain | 4  |                       | NLDIERPTYTNLNR                     | 215  | 14 | 11 | 40.18  | b2°b2b3b5°b5y7y10*y1<br>0y12°y12y14        | 1718.87 | 52.991  | 135862 | 3 | 573.63  | -8.45  |
| Q71U36 TBA1A_HUMAN Tubulin alpha-<br>1A chain | 5  |                       | IHFPLATYAPVISA EK                  | 264  | 16 | 5  | 17.33  | b2b3b8y2y4                                 | 1756.94 | 78.557  | 95386  | 3 | 586.32  | -12.65 |
| Q71U36 TBA1A_HUMAN Tubulin alpha-<br>1A chain | 6  |                       | EDMAALEK                           | 422  | 8  | 7  | 54.41  | y1y2y3y4y5y7y8                             | 906.42  | 36.796  | 59905  | 2 | 453.72  | 0.54   |
| Q71U36 TBA1A_HUMAN Tubulin alpha-<br>1A chain | 7  | Carbamidomethyl+C(15) | AYHEQLSVAEITNACFEPANQMV<br>K       | 280  | 24 | 4  | 28.15  | y4y7y9y13                                  | 2750.32 | 73.693  | 53120  | 3 | 917.44  | 9.94   |

|                                           |    |                       |                       |      |    |    |        |                                                                          |         |         |        |   |         |        |
|-------------------------------------------|----|-----------------------|-----------------------|------|----|----|--------|--------------------------------------------------------------------------|---------|---------|--------|---|---------|--------|
| Q71U36 TBA1A_HUMAN Tubulin alpha-1A chain | 8  |                       | LSVDYGKK              | 156  | 8  | 6  | 54.41  | b2y3y4y5y7y8                                                             | 909.50  | 29.936  | 32828  | 2 | 455.25  | -9.13  |
| Q71U36 TBA1A_HUMAN Tubulin alpha-1A chain | 9  |                       | FDGALNVDLTEFQTNLVPYPR | 243  | 21 | 13 | 76.54  | b2b3b4b17y2y3y4y5y6y11*y11y14y21                                         | 2409.23 | 95.114  | 30203  | 2 | 1205.12 | 7.40   |
| Q7Z406 MYH14_HUMAN Myosin-14              | 1  |                       | QLLQANPILEAFGNAK      | 236  | 16 | 27 | 172.05 | b2*b2b3*b3b4*b4b6*b6b16y2y4*y4y5y6y7*y7*y7y8y9y10y11y12*y12y13*y13y14y16 | 1726.95 | 91.678  | 177915 | 2 | 863.98  | 1.70   |
| Q7Z406 MYH14_HUMAN Myosin-14              | 2  |                       | LAQAEEQLEQETR         | 1839 | 13 | 5  | 30.08  | b4b6°b6b9y13                                                             | 1544.75 | 51.383  | 67378  | 2 | 772.88  | -1.50  |
| Q7Z406 MYH14_HUMAN Myosin-14              | 3  |                       | KEEELQAALAR           | 1104 | 11 | 11 | 99.78  | b3b6b8y2y4y5y8y9y10*y10y11                                               | 1257.68 | 42.992  | 50445  | 2 | 629.34  | -3.30  |
| Q7Z406 MYH14_HUMAN Myosin-14              | 4  | Carbamidomethyl+C(1)  | CNGVLEGIR             | 717  | 9  | 6  | 53.55  | b8y1y3y5y7y9                                                             | 1017.51 | 49.223  | 41562  | 2 | 509.26  | -4.50  |
| Q7Z406 MYH14_HUMAN Myosin-14              | 5  |                       | ELQTAQAQLSEWR         | 1381 | 13 | 9  | 34.35  | b2b6°b6°b6y3y6°y6y8y13                                                   | 1559.78 | 66.170  | 37586  | 2 | 780.40  | 1.02   |
| Q7Z406 MYH14_HUMAN Myosin-14              | 6  |                       | ELQTAQAQLSEWRR        | 1381 | 14 | 4  | 24.91  | b12b13y11°y11                                                            | 1715.87 | 79.587  | 31045  | 2 | 858.44  | -8.61  |
| Q7Z406 MYH14_HUMAN Myosin-14              | 7  |                       | QEEEAGALEAGEEARR      | 1396 | 16 | 3  | 17.33  | b6b8y7                                                                   | 1744.83 | 50.082  | 10697  | 2 | 872.92  | 11.33  |
| Q7Z406 MYH14_HUMAN Myosin-14              | 8  |                       | EEIFSQNRESEK          | 1685 | 12 | 6  | 32.47  | b3b8°b8°b8y4y8                                                           | 1495.71 | 37.723  | 9111   | 2 | 748.36  | 7.92   |
| Q7Z406 MYH14_HUMAN Myosin-14              | 9  |                       | EAEALTQR              | 1416 | 8  | 3  | 41.1   | b5b6b7                                                                   | 917.48  | 42.357  | 2173   | 2 | 459.24  | 7.65   |
| Q7Z406 MYH14_HUMAN Myosin-14              | 10 |                       | AQVTELEDELTAEDAK      | 1562 | 17 | 4  | 23.17  | b8b14y6y14                                                               | 1832.89 | 66.810  | 1998   | 3 | 611.64  | 9.66   |
| Q7Z406 MYH14_HUMAN Myosin-14              | 11 |                       | GPSAGGGPGSGTSPQVEWTAR | 32   | 21 | 12 | 51.93  | b4b13°b13b14b15y12*y12y15°y15y19°y19*y19                                 | 1955.91 | 69.599  | 172769 | 3 | 652.64  | -6.43  |
| Q7Z406 MYH14_HUMAN Myosin-14              | 12 |                       | HEVPPHYAVTEGAYR       | 167  | 16 | 7  | 35.78  | b5b8b9°b9y6°y6y15                                                        | 1824.87 | 88.813  | 81618  | 2 | 912.94  | -17.99 |
| Q7Z406 MYH14_HUMAN Myosin-14              | 13 |                       | AQLLK                 | 1123 | 5  | 2  | 26.61  | y3y4                                                                     | 572.38  | 44.270  | 48732  | 1 | 572.38  | 1.28   |
| Q7Z406 MYH14_HUMAN Myosin-14              | 14 |                       | LQQLFNHTMFVLEQEEYQR   | 501  | 19 | 7  | 37.51  | b7°b7b12b18y5°y5y6                                                       | 2453.17 | 106.123 | 35999  | 4 | 614.05  | -6.97  |
| Q7Z406 MYH14_HUMAN Myosin-14              | 15 |                       | QLPIYTEAIVEMYR        | 149  | 14 | 6  | 57.16  | b3b9y3y6y11y13                                                           | 1725.90 | 86.078  | 24609  | 2 | 863.45  | 5.09   |
| Q7Z406 MYH14_HUMAN Myosin-14              | 16 |                       | VIQYLAHVASSPK         | 210  | 13 | 3  | 30.08  | y5y8y12                                                                  | 1412.78 | 55.665  | 16616  | 2 | 706.89  | -9.68  |
| Q7Z406 MYH14_HUMAN Myosin-14              | 17 |                       | LMATLSNTNPSFVR        | 680  | 14 | 3  | 24.91  | b5y8y9                                                                   | 1550.83 | 116.862 | 16542  | 2 | 775.92  | 20.86  |
| Q7Z406 MYH14_HUMAN Myosin-14              | 18 | Carbamidomethyl+C(8)  | ADLLEPCSHYR           | 316  | 12 | 5  | 50.55  | b6b10y3y4y5                                                              | 1473.72 | 31.049  | 14931  | 3 | 491.91  | 1.49   |
| Q7Z406 MYH14_HUMAN Myosin-14              | 19 |                       | AQAELENVSGALNEAESK    | 1301 | 18 | 5  | 34.98  | b15y3y10y11y13                                                           | 1859.89 | 68.675  | 14545  | 2 | 930.45  | -5.71  |
| Q7Z406 MYH14_HUMAN Myosin-14              | 20 |                       | QIQELR                | 1809 | 6  | 1  | 13.7   | y3                                                                       | 786.45  | 47.633  | 11183  | 2 | 393.73  | 2.41   |
| Q7Z406 MYH14_HUMAN Myosin-14              | 21 |                       | FLTNGPSSSPGQER        | 328  | 14 | 5  | 27.84  | b5°b5b13y4y12                                                            | 1476.72 | 55.594  | 9546   | 2 | 738.87  | 10.42  |
| Q7Z406 MYH14_HUMAN Myosin-14              | 22 |                       | AAVTMSVPGR            | 1    | 10 | 5  | 28.89  | b6°b6b7y7°y7                                                             | 988.55  | 46.148  | 8995   | 2 | 494.78  | 22.72  |
| Q7Z406 MYH14_HUMAN Myosin-14              | 23 |                       | ELFQETLES LR          | 342  | 11 | 4  | 27.52  | b5b6y9*y9                                                                | 1364.69 | 63.724  | 6713   | 2 | 682.85  | -13.06 |
| Q7Z406 MYH14_HUMAN Myosin-14              | 24 | Carbamidomethyl+C(14) | YYSGLIYTYSGLCVVINPYK  | 128  | 21 | 3  | 14.01  | b10y9y12                                                                 | 2520.26 | 73.479  | 6567   | 3 | 840.76  | 3.00   |
| Q7Z406 MYH14_HUMAN Myosin-14              | 25 |                       | AQELQK                | 874  | 6  | 1  | 13.7   | b3                                                                       | 716.38  | 40.802  | 5189   | 1 | 716.38  | -14.14 |



|                              |    |                                          |                              |      |    |   |        |                           |         |         |       |   |         |        |
|------------------------------|----|------------------------------------------|------------------------------|------|----|---|--------|---------------------------|---------|---------|-------|---|---------|--------|
| Q7Z406 MYH14_HUMAN Myosin-14 | 26 |                                          | LGQLEEELEEEQSNSELLNDR        | 1754 | 21 | 5 | 14.01  | b3b17y3*y3*y3             | 2474.15 | 112.455 | 4387  | 2 | 1237.58 | -2.47  |
| Q7Z406 MYH14_HUMAN Myosin-14 | 27 |                                          | QAQQDR                       | 1721 | 6  | 2 | 27.01  | y3y4                      | 745.35  | 59.014  | 3820  | 1 | 745.35  | -8.68  |
| Q7Z406 MYH14_HUMAN Myosin-14 | 28 |                                          | ELEDVTESAESMNR               | 1922 | 14 | 6 | 31.01  | b7*b7y6y12*y12y13         | 1609.71 | 77.332  | 2837  | 2 | 805.36  | 5.84   |
| Q7Z406 MYH14_HUMAN Myosin-14 | 29 |                                          | IVWPSSHPR                    | 1022 | 9  | 4 | 30.71  | b4y5*y5y6                 | 1078.56 | 14.587  | 2087  | 3 | 360.19  | -18.33 |
| Q7Z406 MYH14_HUMAN Myosin-14 | 30 |                                          | ELSSTEAQLHDAQELLQEETR        | 1325 | 21 | 7 | 36.06  | b3*b3y7*y7y8*y8y9         | 2427.13 | 136.376 | 2031  | 2 | 1214.07 | -14.48 |
| Q7Z406 MYH14_HUMAN Myosin-14 | 31 |                                          | GELEDTL DSTNAQQELR           | 1169 | 17 | 8 | 33.09  | b4*b4b12*b12y10y13*y13y15 | 1918.87 | 84.508  | 1758  | 3 | 640.29  | -17.30 |
| Q7Z406 MYH14_HUMAN Myosin-14 | 32 |                                          | EQLEEEAAAR                   | 1366 | 10 | 9 | 105.41 | b5b6b8b9y4y5*y5y6y8       | 1145.53 | 136.353 | 1501  | 1 | 1145.53 | -12.47 |
| Q7Z406 MYH14_HUMAN Myosin-14 | 33 |                                          | LQRAQAELENVSGALNEAESK        | 1298 | 21 | 4 | 19.14  | b8b13y5y11                | 2257.14 | 47.308  | 23490 | 3 | 753.05  | -1.30  |
| Q7Z406 MYH14_HUMAN Myosin-14 | 34 | Carbamidomethyl+C(6)                     | QAKDECSFHIFYQLGGAGEQLK       | 293  | 23 | 5 | 17.69  | b4b20y7*y7y22             | 2639.26 | 88.854  | 13336 | 3 | 880.42  | -13.78 |
| Q7Z406 MYH14_HUMAN Myosin-14 | 35 |                                          | LQQELDDATMDLEQQRQLVSTLEK     | 1441 | 24 | 6 | 19.64  | b9b13*b13b15*b15y22       | 2831.39 | 87.893  | 13082 | 4 | 708.60  | -8.45  |
| Q7Z406 MYH14_HUMAN Myosin-14 | 36 |                                          | VAQEQQGHPKFQRPR              | 571  | 15 | 3 | 18.32  | b6b10y3                   | 1734.90 | 105.111 | 7945  | 2 | 867.96  | -6.12  |
| Q7Z406 MYH14_HUMAN Myosin-14 | 37 |                                          | DLGEELEALRGELEDTL DSTNAQQLER | 1159 | 27 | 5 | 26.23  | b6b10y4y5y8               | 3044.46 | 80.170  | 7033  | 3 | 1015.49 | -2.89  |
| Q7Z406 MYH14_HUMAN Myosin-14 | 38 |                                          | AGVLAQLEEERDLK               | 788  | 14 | 4 | 19.47  | b10b12*b12y3              | 1570.83 | 106.688 | 6164  | 2 | 785.92  | -11.50 |
| Q7Z406 MYH14_HUMAN Myosin-14 | 39 |                                          | ELWREVEETR                   | 1672 | 10 | 6 | 61.51  | b3*b3b5b7b8y4             | 1346.65 | 54.452  | 5618  | 3 | 449.56  | -12.51 |
| Q7Z406 MYH14_HUMAN Myosin-14 | 40 |                                          | AEDEGGARAQLLK                | 1115 | 13 | 3 | 25.6   | b10b11y3                  | 1357.71 | 66.105  | 5399  | 2 | 679.36  | 1.62   |
| Q7Z406 MYH14_HUMAN Myosin-14 | 41 |                                          | EEELQAALARAEDGGAR            | 1105 | 18 | 4 | 22.89  | b8*b8b13b16               | 1914.90 | 75.356  | 5327  | 2 | 957.95  | -8.61  |
| Q7Z406 MYH14_HUMAN Myosin-14 | 42 |                                          | EVGELQGRVAQLEEEER            | 890  | 16 | 5 | 31.05  | b3b9*b9y6y7               | 1841.91 | 103.856 | 4979  | 3 | 614.64  | -12.59 |
| Q7Z406 MYH14_HUMAN Myosin-14 | 43 |                                          | RQEEEAGALEAGEEAR             | 1395 | 16 | 4 | 17.33  | b8b14y11*y11              | 1744.80 | 90.740  | 4793  | 3 | 582.27  | -7.77  |
| Q7Z406 MYH14_HUMAN Myosin-14 | 44 |                                          | AQAELENVSGALNEAESKTIR        | 1301 | 21 | 3 | 20.65  | b4b11b13                  | 2230.14 | 109.503 | 4683  | 3 | 744.05  | 4.27   |
| Q7Z406 MYH14_HUMAN Myosin-14 | 45 |                                          | ANEWLMKNMDPLNDNVAALLHQSTDR   | 606  | 26 | 4 | 12.23  | b11b13y5*y5               | 2996.45 | 84.459  | 4451  | 4 | 749.87  | 4.73   |
| Q7Z406 MYH14_HUMAN Myosin-14 | 46 |                                          | VAEQAANDLRAQVTELEDELTA AEDAK | 1552 | 27 | 5 | 21.46  | b5b7b22y7y15              | 2900.44 | 96.160  | 4186  | 3 | 967.48  | 9.34   |
| Q7Z406 MYH14_HUMAN Myosin-14 | 47 |                                          | ERNTDQATMPDNTAAQK            | 382  | 17 | 4 | 27.64  | b5b6b8y13                 | 1890.88 | 69.543  | 2519  | 2 | 945.94  | 9.75   |
| Q7Z406 MYH14_HUMAN Myosin-14 | 48 |                                          | EAQAALAEAQEDLESERVAR         | 1131 | 20 | 5 | 30.97  | b3*b3b8b9b16              | 2186.09 | 114.122 | 1987  | 2 | 1093.55 | 12.06  |
| Q7Z406 MYH14_HUMAN Myosin-14 | 49 |                                          | EVEETRISR                    | 1676 | 9  | 4 | 30.71  | b3y3*y3y6                 | 1106.53 | 98.397  | 1714  | 2 | 553.77  | -12.80 |
| Q7Z406 MYH14_HUMAN Myosin-14 | 50 | Phosphoryl STY(7)                        | VTDIIVSFQAAAR                | 802  | 13 | 3 | 20.83  | b7b10y6                   | 1470.71 | 43.171  | 13295 | 3 | 490.91  | -12.95 |
| Q7Z406 MYH14_HUMAN Myosin-14 | 51 | Phosphoryl STY(7)                        | ASISYGSNMRPQSQTWR            | 1040 | 17 | 4 | 23.88  | y6_H3PO4 y6y9*y9y11       | 2048.91 | 69.950  | 9184  | 3 | 683.64  | 7.63   |
| Q7Z406 MYH14_HUMAN Myosin-14 | 52 | Carbamidomethyl+C(9); Phosphoryl STY(14) | AEDMAELTCLNEASVLHNL RER      | 106  | 22 | 3 | 22.31  | b11b12y10                 | 2651.21 | 136.850 | 4209  | 2 | 1326.11 | 10.04  |
| Q7Z406 MYH14_HUMAN Myosin-14 | 53 | Phosphoryl STY(11)                       | VLGFSHEEIIISMLR              | 353  | 14 | 4 | 19.47  | b9y5*y5y9                 | 1710.84 | 57.219  | 3608  | 2 | 855.92  | 10.85  |
| Q7Z406 MYH14_HUMAN Myosin-14 | 54 | Phosphoryl STY(5)                        | LDGESSELQEQMVEQQQR           | 1076 | 18 | 3 | 15.73  | b3y9y12                   | 2213.90 | 101.191 | 3560  | 4 | 554.23  | -14.45 |

|                                                         |    |                                         |                                                   |      |    |   |       |                        |         |         |        |   |         |        |
|---------------------------------------------------------|----|-----------------------------------------|---------------------------------------------------|------|----|---|-------|------------------------|---------|---------|--------|---|---------|--------|
| Q7Z406 MYH14_HUMAN Myosin-14                            | 55 | Phosphoryl STY(11)                      | HEVPPHVYAVTEGAYR                                  | 167  | 16 | 3 | 17.33 | b9y5y11_H3PO4 y11      | 1904.84 | 59.077  | 2163   | 3 | 635.62  | -9.23  |
| Q7Z406 MYH14_HUMAN Myosin-14                            | 56 | Oxidation+M(3)                          | AQMASAGQGK                                        | 1647 | 10 | 4 | 27.12 | b5y5y7°y7              | 964.45  | 28.950  | 14984  | 2 | 482.73  | -2.03  |
| Q7Z406 MYH14_HUMAN Myosin-14                            | 57 | Oxidation+M(6)                          | MAAVTMSVPGR                                       | 0    | 11 | 3 | 24.51 | b5b8y8                 | 1135.56 | 83.552  | 3502   | 2 | 568.29  | 4.08   |
| Q7Z406 MYH14_HUMAN Myosin-14                            | 58 | Oxidation+M(2)                          | AMEAEAAGLREQLEEEAAARER                            | 1356 | 22 | 3 | 13.56 | b11b13y8               | 2446.17 | 97.110  | 2844   | 3 | 816.06  | 3.69   |
| Q7Z406 MYH14_HUMAN Myosin-14                            | 59 | Carbamidomethyl+C(13)<br>;Oxidation+M() | SMLQDREDQSILCTGESGAGK                             | 183  | 21 | 5 | 35.5  | b3b11b18y6y7           | 2298.05 | 136.375 | 2274   | 2 | 1149.53 | 6.80   |
| P50552 VASP_HUMAN Vasodilator-stimulated phosphoprotein | 1  |                                         | ATVMLYDDGNKR                                      | 10   | 12 | 7 | 48.21 | y5°y5*y5y6y8°y8y9      | 1382.68 | 41.003  | 22756  | 2 | 691.84  | 3.71   |
| P50552 VASP_HUMAN Vasodilator-stimulated phosphoprotein | 2  |                                         | QQPGPSEHIER                                       | 143  | 11 | 6 | 68.9  | y2y3y4y6y7y9           | 1277.61 | 24.968  | 14008  | 3 | 426.54  | -6.69  |
| P50552 VASP_HUMAN Vasodilator-stimulated phosphoprotein | 3  |                                         | VPAQSESVR                                         | 298  | 9  | 3 | 38.49 | y6y7y8                 | 972.51  | 20.141  | 9114   | 2 | 486.76  | -4.08  |
| P50552 VASP_HUMAN Vasodilator-stimulated phosphoprotein | 4  |                                         | DESANQEEPEAR                                      | 286  | 12 | 9 | 60.05 | b2b3b5y2y3°y3y4y5y8    | 1374.58 | 19.702  | 7954   | 2 | 687.79  | 0.53   |
| P50552 VASP_HUMAN Vasodilator-stimulated phosphoprotein | 5  |                                         | ATVMLYDDGNK                                       | 10   | 11 | 4 | 35.6  | b7b9y4y9               | 1226.56 | 52.058  | 6866   | 3 | 409.52  | -11.45 |
| P50552 VASP_HUMAN Vasodilator-stimulated phosphoprotein | 6  |                                         | QEEASGGPTAPK                                      | 240  | 12 | 5 | 35.7  | b12y2y6y7y8            | 1171.56 | 19.084  | 6627   | 2 | 586.28  | -0.42  |
| P50552 VASP_HUMAN Vasodilator-stimulated phosphoprotein | 7  | Carbamidomethyl+C(13)                   | SSSSVTTSETQPCTPSSSDYDLQR                          | 321  | 25 | 4 | 16.49 | b8b12y8y11             | 2707.15 | 45.323  | 3753   | 3 | 903.05  | -5.86  |
| P50552 VASP_HUMAN Vasodilator-stimulated phosphoprotein | 8  |                                         | EDAAQFAAGMASALELEGGGPP<br>PPPALPTWSVPNGPSPEEVEQQR | 96   | 47 | 7 | 11.6  | b2b12b22y2y11°y11y14   | 4781.33 | 112.440 | 3126   | 4 | 1196.09 | 2.66   |
| P50552 VASP_HUMAN Vasodilator-stimulated phosphoprotein | 9  |                                         | WLPAGTGPQAFSR                                     | 22   | 13 | 4 | 20.83 | b4b8y12°y12            | 1387.72 | 62.411  | 48897  | 2 | 694.37  | 9.24   |
| P50552 VASP_HUMAN Vasodilator-stimulated phosphoprotein | 10 |                                         | YNQATPNFHQWR                                      | 71   | 12 | 6 | 34.53 | b8y4y8°y8*y8y9         | 1561.75 | 49.490  | 39670  | 3 | 521.25  | 13.21  |
| P50552 VASP_HUMAN Vasodilator-stimulated phosphoprotein | 11 |                                         | ATQVGEK                                           | 276  | 7  | 3 | 40.71 | y4y5y6                 | 732.39  | 39.953  | 13134  | 1 | 732.39  | 5.33   |
| P50552 VASP_HUMAN Vasodilator-stimulated phosphoprotein | 12 |                                         | SGGGGLMEEMNAMLAR                                  | 257  | 16 | 8 | 45.4  | b7b14y6y8*y8y14*y14y15 | 1623.74 | 88.823  | 12734  | 2 | 812.37  | 6.54   |
| P50552 VASP_HUMAN Vasodilator-stimulated phosphoprotein | 13 | Carbamidomethyl+C(7)                    | MSETVICSSR                                        | 0    | 10 | 3 | 28.89 | b8y8y9                 | 1169.52 | 37.714  | 4910   | 1 | 1169.52 | -5.11  |
| P50552 VASP_HUMAN Vasodilator-stimulated phosphoprotein | 14 |                                         | RPWEKNSTTLPR                                      | 307  | 12 | 4 | 37.54 | b3b6b8y3               | 1484.80 | 73.587  | 174646 | 2 | 742.90  | 0.08   |
| P50552 VASP_HUMAN Vasodilator-stimulated phosphoprotein | 15 |                                         | RQQPGPSEHIER                                      | 142  | 12 | 3 | 22.48 | b3y8y10                | 1433.71 | 50.983  | 148784 | 2 | 717.36  | -8.09  |
| P50552 VASP_HUMAN Vasodilator-stimulated phosphoprotein | 16 | Carbamidomethyl+C(7)                    | MSETVICSSRATVMLYDDGNK                             | 0    | 21 | 5 | 19.14 | b6b10y4y10°y10         | 2377.09 | 102.674 | 30794  | 3 | 793.03  | 0.82   |

|                                                         |    |                       |                                   |     |    |    |        |                                             |         |         |       |   |         |        |
|---------------------------------------------------------|----|-----------------------|-----------------------------------|-----|----|----|--------|---------------------------------------------|---------|---------|-------|---|---------|--------|
| P50552 VASP_HUMAN Vasodilator-stimulated phosphoprotein | 17 |                       | DARQVWGLNFGSK                     | 83  | 13 | 5  | 20.83  | b10y6°y6*y6y9                               | 1477.75 | 61.922  | 9569  | 2 | 739.38  | -2.23  |
| P50552 VASP_HUMAN Vasodilator-stimulated phosphoprotein | 18 |                       | RWLPAGTGPQAFSR                    | 21  | 14 | 4  | 19.47  | b6y6°y6y9                                   | 1543.82 | 121.165 | 8622  | 2 | 772.41  | 1.42   |
| P50552 VASP_HUMAN Vasodilator-stimulated phosphoprotein | 19 |                       | SGGGGLMEEMNAMLARR                 | 257 | 17 | 5  | 48.43  | b3b4b5°b5b6                                 | 1779.83 | 74.602  | 8570  | 4 | 445.71  | -0.75  |
| P50552 VASP_HUMAN Vasodilator-stimulated phosphoprotein | 20 |                       | VSKQEEASGGPTAPK                   | 237 | 15 | 3  | 18.32  | b8y8y14                                     | 1485.73 | 42.322  | 5730  | 3 | 495.92  | -14.05 |
| P50552 VASP_HUMAN Vasodilator-stimulated phosphoprotein | 21 |                       | QEEASGGPTAPKAESGR                 | 240 | 17 | 5  | 37.19  | b12y14y15y16°y16                            | 1671.81 | 66.810  | 4261  | 2 | 836.41  | 11.61  |
| P50552 VASP_HUMAN Vasodilator-stimulated phosphoprotein | 22 |                       | AESGRSGGGGLMEEMNAMLAR             | 252 | 21 | 4  | 14.01  | b13b15°b15y9                                | 2123.97 | 54.827  | 3813  | 2 | 1062.49 | 2.99   |
| P50552 VASP_HUMAN Vasodilator-stimulated phosphoprotein | 23 | Carbamidomethyl+C(13) | SSSSVTTSETQPCTPSSSDYDLQRVK        | 321 | 27 | 6  | 55.46  | b5b10b11b12b13b16                           | 2934.29 | 57.194  | 1959  | 3 | 978.77  | -13.65 |
| P50552 VASP_HUMAN Vasodilator-stimulated phosphoprotein | 24 | Oxidation+M(7)        | SGGGGLMEEMNAMLARR                 | 257 | 17 | 5  | 16.48  | b5b16°b16y10*y10                            | 1795.85 | 76.375  | 3705  | 4 | 449.72  | 14.41  |
| P50552 VASP_HUMAN Vasodilator-stimulated phosphoprotein | 25 |                       | EDAAQFAAGMASALELEGGGPPPPALPTWSVPN | 96  | 35 | 0  | 16.66  |                                             | 3416.68 | 112.523 | 6772  | 3 | 1139.57 | 9.93   |
| P50552 VASP_HUMAN Vasodilator-stimulated phosphoprotein | 26 |                       | VMLYDDGNKR                        | 12  | 10 | 1  | 7.63   | b6                                          | 1210.59 | 41.013  | 5074  | 2 | 605.80  | 4.24   |
| P50552 VASP_HUMAN Vasodilator-stimulated phosphoprotein | 27 |                       | PGPSEHIER                         | 145 | 9  | 0  | 2.38   |                                             | 1021.51 | 24.973  | 4097  | 2 | 511.26  | 0.42   |
| P50552 VASP_HUMAN Vasodilator-stimulated phosphoprotein | 28 |                       | MLYDDGNKR                         | 13  | 9  | 0  | 2.78   |                                             | 1111.53 | 40.971  | 2715  | 2 | 556.27  | 5.49   |
| P50552 VASP_HUMAN Vasodilator-stimulated phosphoprotein | 29 |                       | PPPPALPTWSVPNGPSPEEVEQQR          | 117 | 26 | 0  | 16.66  |                                             | 2834.43 | 112.451 | 2311  | 3 | 945.48  | -4.91  |
| P50552 VASP_HUMAN Vasodilator-stimulated phosphoprotein | 30 |                       | QQPGPSEHIER                       | 143 | 11 | 0  | 2.38   |                                             | 1260.59 | 24.961  | 3546  | 3 | 420.87  | 0.97   |
| P50552 VASP_HUMAN Vasodilator-stimulated phosphoprotein | 31 |                       | ATVMLYDDGNKR                      | 10  | 12 | 0  | 2.78   |                                             | 1364.64 | 41.018  | 1786  | 3 | 455.55  | -14.22 |
| P06733 ENOA_HUMAN Alpha-enolase                         | 1  | Carbamidomethyl+C(14) | VNQIGSVTESLQACK                   | 343 | 15 | 6  | 36.97  | b15y3y11y12y14y15                           | 1633.83 | 54.723  | 52732 | 2 | 817.42  | 3.51   |
| P06733 ENOA_HUMAN Alpha-enolase                         | 2  |                       | HIADLAGNSEVILPVPFNVINGGSHAGNK     | 132 | 30 | 17 | 152.54 | b4b5b6b7b8b9b10°b10b11b12y1y7y8y12y15y17y18 | 3011.55 | 85.002  | 51551 | 4 | 753.64  | -5.84  |
| P06733 ENOA_HUMAN Alpha-enolase                         | 3  |                       | DATNVGDEGGFAPNILENKEGLEL LK       | 202 | 26 | 11 | 27.74  | b2b3°b3b5°b5b6b14y1y2y14y26                 | 2743.39 | 84.999  | 42968 | 3 | 915.13  | 2.94   |
| P06733 ENOA_HUMAN Alpha-enolase                         | 4  |                       | LAMQEFMLPVGAAFR                   | 162 | 17 | 6  | 53.8   | y6y7y8y9y13y17                              | 1908.00 | 100.645 | 42819 | 2 | 954.50  | 4.16   |
| P06733 ENOA_HUMAN Alpha-enolase                         | 5  |                       | SFIKDYPPVVSIEDPFDQDDWGAWQK        | 281 | 25 | 5  | 26.03  | b6b13y12°y12y13                             | 2985.40 | 95.780  | 35144 | 3 | 995.80  | 1.55   |
| P06733 ENOA_HUMAN Alpha-enolase                         | 6  |                       | AAVPSGASTGIYEALER                 | 32  | 18 | 8  | 41.22  | b2b7b8b10b12y7y15y18                        | 1804.96 | 78.873  | 32047 | 2 | 902.98  | 8.86   |

|                                          |    |                                                                         |                                 |     |    |    |        |                                     |         |         |        |   |         |        |
|------------------------------------------|----|-------------------------------------------------------------------------|---------------------------------|-----|----|----|--------|-------------------------------------|---------|---------|--------|---|---------|--------|
| P06733 ENOA_HUMAN Alpha-enolase          | 7  |                                                                         | IGAEVYHNLK                      | 183 | 10 | 7  | 58.5   | b8y3y4y5y7°y7*y7                    | 1143.62 | 39.768  | 17502  | 2 | 572.31  | 3.52   |
| P06733 ENOA_HUMAN Alpha-enolase          | 8  |                                                                         | DATNVGDEGGFAPNILENK             | 202 | 19 | 5  | 23.88  | b6°b6y3y6y9                         | 1960.91 | 54.523  | 12748  | 3 | 654.31  | -8.84  |
| P06733 ENOA_HUMAN Alpha-enolase          | 9  |                                                                         | YDLDFK                          | 256 | 6  | 8  | 66.92  | b3°b3b4y3°y3y4y5°y5                 | 800.37  | 54.712  | 59816  | 2 | 400.69  | -10.75 |
| P06733 ENOA_HUMAN Alpha-enolase          | 10 |                                                                         | GNPTVEVDLFTSK                   | 15  | 13 | 4  | 34.35  | b8y4y7y9                            | 1406.72 | 68.451  | 37128  | 2 | 703.86  | 4.08   |
| P06733 ENOA_HUMAN Alpha-enolase          | 11 |                                                                         | FTASAGIQVVGGDLTVTNPK            | 306 | 20 | 3  | 14.51  | b8y13y15                            | 2033.10 | 93.564  | 15997  | 2 | 1017.05 | 22.10  |
| P06733 ENOA_HUMAN Alpha-enolase          | 12 |                                                                         | VVIGMDVAASEFFR                  | 239 | 14 | 3  | 19.47  | b6y5y9                              | 1540.80 | 62.764  | 12108  | 2 | 770.91  | 14.10  |
| P06733 ENOA_HUMAN Alpha-enolase          | 13 |                                                                         | LAQANGWGVMSHR                   | 358 | 14 | 9  | 62.69  | b5b6b10y4y9°y9y11*y11y12            | 1525.75 | 59.008  | 7906   | 3 | 509.25  | -15.84 |
| P06733 ENOA_HUMAN Alpha-enolase          | 14 |                                                                         | DYPVVSIEDPFDQDDWGAWQK           | 285 | 21 | 3  | 22.46  | b5b6y7                              | 2510.15 | 96.549  | 6836   | 2 | 1255.58 | 12.26  |
| P06733 ENOA_HUMAN Alpha-enolase          | 15 |                                                                         | LMIEMDGTEENK                    | 92  | 11 | 5  | 38.61  | b9b10y3*y3y9                        | 1280.61 | 40.035  | 4141   | 3 | 427.54  | 20.59  |
| P06733 ENOA_HUMAN Alpha-enolase          | 16 |                                                                         | YISPDQLADLYK                    | 269 | 12 | 7  | 26.46  | b8°b8b9°b9°b9y5°y5                  | 1425.74 | 110.458 | 1954   | 2 | 713.37  | 6.59   |
| P06733 ENOA_HUMAN Alpha-enolase          | 17 |                                                                         | EAMR                            | 179 | 4  | 1  | 12.91  | y3                                  | 506.25  | 20.593  | 1687   | 1 | 506.25  | 14.95  |
| P06733 ENOA_HUMAN Alpha-enolase          | 18 |                                                                         | YDLDFKSPDDPSR                   | 256 | 13 | 4  | 41.62  | b3b5b6b11                           | 1554.72 | 59.970  | 24069  | 2 | 777.86  | 5.89   |
| P06733 ENOA_HUMAN Alpha-enolase          | 19 |                                                                         | SPDDPSRYISPDQLADLYK             | 262 | 19 | 6  | 31.95  | b9b13y4°y4y5y17                     | 2180.07 | 66.156  | 11597  | 3 | 727.36  | 10.53  |
| P06733 ENOA_HUMAN Alpha-enolase          | 20 |                                                                         | IHAREIFDSR                      | 5   | 10 | 4  | 48.21  | b3b5b9y3                            | 1243.66 | 88.786  | 9615   | 2 | 622.34  | 8.25   |
| P06733 ENOA_HUMAN Alpha-enolase          | 21 |                                                                         | SGKYDLDFK                       | 253 | 9  | 4  | 45.77  | b3b7b8y5                            | 1072.53 | 47.285  | 5632   | 2 | 536.77  | -3.98  |
| P06733 ENOA_HUMAN Alpha-enolase          | 22 |                                                                         | FAGRNR                          | 422 | 7  | 3  | 37.7   | b5b6y3                              | 867.46  | 55.779  | 4916   | 2 | 434.24  | 7.18   |
| P06733 ENOA_HUMAN Alpha-enolase          | 23 |                                                                         | SFIKDYPVVSIEDPFDQDDWGAWQK       | 281 | 25 | 3  | 12.51  | b3b6y11                             | 2985.41 | 59.838  | 4881   | 4 | 747.11  | 3.93   |
| P06733 ENOA_HUMAN Alpha-enolase          | 24 | Carbamidomethyl+C(2);<br>Carbamidomethyl+C(4);<br>Carbamidomethyl+C(22) | SCNCLLLKVNQIGSVTESLQACK         | 335 | 23 | 6  | 29.76  | b16y11*y11y13y15y21                 | 2622.27 | 136.809 | 3319   | 2 | 1311.64 | -12.85 |
| P06733 ENOA_HUMAN Alpha-enolase          | 25 |                                                                         | GAEVYHNLK                       | 184 | 9  | 0  | 1.98   |                                     | 1030.53 | 39.740  | 27012  | 2 | 515.77  | -1.30  |
| P06733 ENOA_HUMAN Alpha-enolase          | 26 |                                                                         | NSEVILPVPAFNVINGGSHAGNK         | 139 | 23 | 1  | 9.24   | b4                                  | 2334.21 | 84.963  | 12951  | 3 | 778.74  | -2.72  |
| P68371 TBB2C_HUMAN Tubulin beta-2C chain | 1  |                                                                         | SGPFGQIFRPDNFVFGQSGAGNNWAK      | 77  | 26 | 13 | 41.26  | b2°b2b13b14b17y1y2y6y9y12*y12y14y26 | 2798.36 | 90.206  | 180420 | 3 | 933.46  | 6.19   |
| P68371 TBB2C_HUMAN Tubulin beta-2C chain | 2  |                                                                         | LAVNMVFPFR                      | 252 | 10 | 15 | 101.43 | b2b5*b5y1y2y3y4y5y6y7*y7y8y9*y9y10  | 1143.63 | 72.994  | 161983 | 2 | 572.32  | -2.24  |
| P68371 TBB2C_HUMAN Tubulin beta-2C chain | 3  |                                                                         | IMNTFSVPSPK                     | 162 | 12 | 7  | 64.53  | y4°y4y5y6y7y8y12                    | 1319.71 | 63.914  | 89853  | 2 | 660.36  | 2.41   |
| P68371 TBB2C_HUMAN Tubulin beta-2C chain | 4  | Carbamidomethyl+C(23)                                                   | LTTPYTGDLNHLVSATMSGVTTCLR       | 216 | 25 | 9  | 65.04  | y2y3y5y6y7y8y12y22y25               | 2708.33 | 95.908  | 82625  | 3 | 903.45  | -2.43  |
| P68371 TBB2C_HUMAN Tubulin beta-2C chain | 5  | Carbamidomethyl+C(6);<br>Carbamidomethyl+C(8)                           | KEAESDCDQGFQLTHSLGGGTGSGMGTLISK | 121 | 33 | 5  | 13.42  | b3b22y4y7y33                        | 3439.63 | 78.423  | 15018  | 3 | 1147.22 | 0.35   |
| P68371 TBB2C_HUMAN Tubulin beta-2C chain | 6  |                                                                         | MSATFIGNSTAIQELFKR              | 362 | 18 | 5  | 24.66  | b6b7b14°b14y2                       | 2014.07 | 69.704  | 4559   | 2 | 1007.54 | 11.64  |
| P68371 TBB2C_HUMAN Tubulin beta-2C chain | 7  |                                                                         | EVDEQMLNVQNK                    | 324 | 12 | 3  | 29.68  | y5y6y10                             | 1446.69 | 47.428  | 45365  | 2 | 723.85  | 1.60   |

|                                                    |    |                       |                               |      |    |    |        |                                                                                    |         |        |         |   |         |        |
|----------------------------------------------------|----|-----------------------|-------------------------------|------|----|----|--------|------------------------------------------------------------------------------------|---------|--------|---------|---|---------|--------|
| P68371 TBB2C_HUMAN Tubulin beta-2C chain           | 8  |                       | LHFFMPGFAPLTSR                | 262  | 14 | 6  | 51.14  | b4b8b9b13y5y11                                                                     | 1620.82 | 89.987 | 29934   | 3 | 540.94  | -10.85 |
| P68371 TBB2C_HUMAN Tubulin beta-2C chain           | 9  |                       | ALTVPELTQQMFDK                | 282  | 15 | 8  | 56.01  | b13°b13y4°y4y5y7y8y13                                                              | 1691.87 | 60.044 | 2264    | 3 | 564.63  | 3.03   |
| Q6S8J3 A26CA_HUMAN ANKRD26-like family C member 1A | 1  |                       | SYELPDGQVITIGNER              | 938  | 16 | 25 | 199.45 | b2b3b8b9°b9b10b11°b11b12°b12y3*y3y4y5y6*y6y7y8y10*y10y11y12°y12y13y16              | 1790.90 | 71.671 | 2789179 | 2 | 895.96  | 7.02   |
| Q6S8J3 A26CA_HUMAN ANKRD26-like family C member 1A | 2  |                       | AGFAGDDAPR                    | 718  | 10 | 17 | 127.24 | b2b3b4b8y1y2y3y4°y4y5y6°y6y7°y7y8y9y10                                             | 976.45  | 31.456 | 1944071 | 2 | 488.73  | -3.06  |
| Q6S8J3 A26CA_HUMAN ANKRD26-like family C member 1A | 3  |                       | AVFPSIVGRPR                   | 728  | 11 | 14 | 114.34 | b1b2b9y1y2y3y4y5y6y7y8y9y10y11                                                     | 1198.71 | 56.275 | 885373  | 2 | 599.86  | 1.63   |
| Q6S8J3 A26CA_HUMAN ANKRD26-like family C member 1A | 4  |                       | QEYDESGPSIVHRK                | 1059 | 14 | 24 | 175.06 | b3°b3b4°b4°b4b5b7°b7b14y2y3y4y5y6°y6y7y8y9y10°y10y11y12y14*y14                     | 1644.78 | 32.248 | 414928  | 3 | 548.93  | -11.87 |
| Q6S8J3 A26CA_HUMAN ANKRD26-like family C member 1A | 5  | Carbamidomethyl+C(2)  | LCYVALDFEQEMATAASSSSLEK       | 915  | 23 | 30 | 229.47 | b2b3b5b6b7°b7b8b9b11°b11b15b16b17y1y4y5y6y7y9y10y11°y11y12y13°y13y16°y16y17*y17y23 | 2550.20 | 92.835 | 345239  | 2 | 1275.60 | 8.81   |
| Q6S8J3 A26CA_HUMAN ANKRD26-like family C member 1A | 6  |                       | QEYDESGPSIVHR                 | 1059 | 13 | 6  | 78.23  | y3y4y5y6y8y11                                                                      | 1516.70 | 38.099 | 279257  | 3 | 506.24  | -0.32  |
| Q6S8J3 A26CA_HUMAN ANKRD26-like family C member 1A | 7  |                       | GILTLK                        | 762  | 6  | 8  | 66.92  | b3b4°b4b5°b5y3y4°y4                                                                | 644.43  | 53.361 | 265888  | 1 | 644.43  | -3.13  |
| Q6S8J3 A26CA_HUMAN ANKRD26-like family C member 1A | 8  |                       | LDLAGR                        | 877  | 6  | 2  | 27.01  | y4y5                                                                               | 644.37  | 34.095 | 106340  | 1 | 644.37  | 2.65   |
| Q6S8J3 A26CA_HUMAN ANKRD26-like family C member 1A | 9  |                       | ISSENSNPEQELK                 | 367  | 13 | 5  | 20.83  | b4b7°b7y8*y8                                                                       | 1474.72 | 72.070 | 22972   | 3 | 492.24  | 11.34  |
| Q6S8J3 A26CA_HUMAN ANKRD26-like family C member 1A | 10 |                       | MTQIMFETFNTPAMYVAIQAVPSLYTSGR | 818  | 29 | 7  | 22.29  | b12y6y7°y7y12°y12*y12                                                              | 3267.54 | 80.501 | 3152    | 2 | 1634.27 | -14.49 |
| Q6S8J3 A26CA_HUMAN ANKRD26-like family C member 1A | 11 |                       | EEIAMLRLLELDTMK               | 652  | 14 | 7  | 54.15  | b5b9y3y4y5°y5y7                                                                    | 1691.88 | 76.990 | 49568   | 2 | 846.44  | 3.90   |
| Q6S8J3 A26CA_HUMAN ANKRD26-like family C member 1A | 12 |                       | DVLHENSTLREEIAML              | 642  | 17 | 3  | 16.48  | b7b12y3                                                                            | 2026.07 | 91.503 | 29775   | 3 | 676.03  | 13.92  |
| Q6S8J3 A26CA_HUMAN ANKRD26-like family C member 1A | 13 | Carbamidomethyl+C(16) | QIEVVEKMNSLSLCK               | 622  | 17 | 6  | 26.39  | b9y7°y7y12*y12y14                                                                  | 1994.02 | 69.551 | 24688   | 3 | 665.34  | 12.55  |
| Q6S8J3 A26CA_HUMAN ANKRD26-like family C member 1A | 14 |                       | LTSEESQRLK                    | 498  | 11 | 5  | 24.51  | b4°b4b10y10°y10                                                                    | 1319.66 | 72.866 | 23065   | 2 | 660.33  | -14.34 |
| Q6S8J3 A26CA_HUMAN ANKRD26-like family C member 1A | 15 |                       | QQGMMGGMHQKESYVGK             | 739  | 17 | 4  | 16.48  | b11y6°y6y9                                                                         | 1895.86 | 54.491 | 18090   | 4 | 474.72  | 0.97   |
| Q6S8J3 A26CA_HUMAN ANKRD26-like family C member 1A | 16 |                       | SNVGTSGDHDSDAMKTLR            | 40   | 18 | 3  | 15.73  | b7b10y14                                                                           | 1890.89 | 47.921 | 5753    | 3 | 630.97  | 13.56  |

|                                                     |    |                                                                                                 |                             |      |    |    |       |                                     |         |         |        |   |         |        |
|-----------------------------------------------------|----|-------------------------------------------------------------------------------------------------|-----------------------------|------|----|----|-------|-------------------------------------|---------|---------|--------|---|---------|--------|
| [Q6S8J3]A26CA_HUMAN ANKRD26-like family C member 1A | 17 |                                                                                                 | SNVGASGDHDDSAMKTLR          | 77   | 18 | 4  | 15.73 | b7y9°y9y11                          | 1860.84 | 59.983  | 5242   | 2 | 930.93  | -3.67  |
| [Q6S8J3]A26CA_HUMAN ANKRD26-like family C member 1A | 18 |                                                                                                 | AVFPSIVGRPRQQGMMGMHQK       | 728  | 22 | 3  | 20.08 | y4y7y13                             | 2412.19 | 84.442  | 4731   | 2 | 1206.60 | -11.94 |
| [Q6S8J3]A26CA_HUMAN ANKRD26-like family C member 1A | 19 |                                                                                                 | GYRFTTMAER                  | 896  | 10 | 5  | 40.43 | b4y5y6y8°y8                         | 1231.58 | 26.930  | 2992   | 2 | 616.29  | -8.92  |
| [Q6S8J3]A26CA_HUMAN ANKRD26-like family C member 1A | 20 | Carbamidomethyl+C(2);<br>Carbamidomethyl+C(5);<br>Carbamidomethyl+C(8);<br>Carbamidomethyl+C(9) | WCHHCFPCCRGSGK              | 63   | 14 | 4  | 38.79 | b10b11b12y13                        | 1848.73 | 136.772 | 2970   | 1 | 1848.73 | 0.33   |
| [Q6S8J3]A26CA_HUMAN ANKRD26-like family C member 1A | 21 |                                                                                                 | QMLKISSENSNPEQELK           | 363  | 17 | 6  | 26.39 | b12*b12y5y7°y7y14                   | 1974.95 | 86.210  | 2801   | 3 | 658.99  | -14.71 |
| [Q6S8J3]A26CA_HUMAN ANKRD26-like family C member 1A | 22 |                                                                                                 | SQEPEINKDGDR                | 519  | 12 | 3  | 22.48 | b4y4y7                              | 1387.66 | 51.797  | 2181   | 2 | 694.34  | 14.34  |
| [Q6S8J3]A26CA_HUMAN ANKRD26-like family C member 1A | 23 |                                                                                                 | GSGKSNVGASGDHDDSAMK         | 73   | 19 | 3  | 15.08 | b14y11y17                           | 1819.80 | 49.496  | 1998   | 2 | 910.41  | 9.39   |
| [Q6S8J3]A26CA_HUMAN ANKRD26-like family C member 1A | 24 |                                                                                                 | GSENSQPEKMSQELEINK          | 391  | 18 | 3  | 15.73 | b11b15y10                           | 2047.94 | 73.043  | 1636   | 2 | 1024.47 | -8.70  |
| [Q6S8J3]A26CA_HUMAN ANKRD26-like family C member 1A | 25 |                                                                                                 | ELENFMAIEEMKK               | 531  | 13 | 7  | 29.95 | b3b5°b5y5°y5y11*y11                 | 1611.76 | 81.577  | 1615   | 2 | 806.38  | -8.10  |
| [Q6S8J3]A26CA_HUMAN ANKRD26-like family C member 1A | 26 | Carbamidomethyl+C(12);<br>Phosphoryl STY()                                                      | EYAVSSHHHVICQLSDYKEK        | 342  | 21 | 3  | 22.46 | b4_H3PO4 b4b5y5                     | 2623.21 | 121.860 | 24355  | 3 | 875.08  | 8.75   |
| [Q6S8J3]A26CA_HUMAN ANKRD26-like family C member 1A | 27 | Oxidation+M()                                                                                   | SNVGASGDHDDSAMK             | 77   | 15 | 8  | 29.7  | b3°b3b12*b12b14*b14y12°y12          | 1506.60 | 26.014  | 483747 | 2 | 753.80  | -11.67 |
| [Q6S8J3]A26CA_HUMAN ANKRD26-like family C member 1A | 28 | Oxidation+M()                                                                                   | SQEPEINKDGDRELENFMAIEEMK    | 519  | 24 | 7  | 23.89 | b11b19y3°y3y5y7°y7                  | 2868.31 | 94.859  | 41151  | 3 | 956.77  | 1.96   |
| [Q6S8J3]A26CA_HUMAN ANKRD26-like family C member 1A | 29 | Oxidation+M(1)                                                                                  | MSQELEINKDGDREVEEEMK        | 400  | 20 | 4  | 22.64 | b13°b13y7y8                         | 2425.12 | 105.076 | 7295   | 3 | 809.05  | 14.40  |
| [Q6S8J3]A26CA_HUMAN ANKRD26-like family C member 1A | 30 | Oxidation+M()                                                                                   | FTTMAER                     | 899  | 7  | 4  | 40.71 | b3°b3b5y3                           | 871.41  | 92.885  | 6410   | 1 | 871.41  | 9.25   |
| [Q6S8J3]A26CA_HUMAN ANKRD26-like family C member 1A | 31 | Oxidation+M(1)                                                                                  | MSQELEINKDGDR               | 400  | 13 | 7  | 39.49 | b9b10y8°y8y9°y9*y9                  | 1550.73 | 37.727  | 5514   | 3 | 517.58  | 11.34  |
| [Q6S8J3]A26CA_HUMAN ANKRD26-like family C member 1A | 32 | Oxidation+M()                                                                                   | QQGMMGMHQKESYVGK            | 739  | 17 | 6  | 41.92 | b15y9y11y12y13*y13                  | 1911.87 | 58.966  | 2410   | 2 | 956.44  | 12.51  |
| [Q6S8J3]A26CA_HUMAN ANKRD26-like family C member 1A | 33 | Oxidation+M()                                                                                   | ELENFMAIEEMKK               | 531  | 13 | 4  | 25.6  | b12°b12y7y8                         | 1627.79 | 55.527  | 1725   | 2 | 814.40  | 12.07  |
| [Q6S8J3]A26CA_HUMAN ANKRD26-like family C member 1A | 34 |                                                                                                 | QEYDESGPSIVHR               | 1059 | 13 | 0  | 3.17  |                                     | 1498.68 | 38.086  | 25112  | 3 | 500.23  | -6.03  |
| [P04350]TBB4_HUMAN Tubulin beta-4 chain             | 1  |                                                                                                 | SGPFGQIFRPDNFVFGQSGAGNN WAK | 77   | 26 | 13 | 41.26 | b2°b2b13b14b17y1y2y6y9y12*y12y14y26 | 2798.36 | 90.206  | 180420 | 3 | 933.46  | 6.19   |

|                                         |    |                                              |                                      |     |    |    |        |                                                 |         |         |        |   |         |        |
|-----------------------------------------|----|----------------------------------------------|--------------------------------------|-----|----|----|--------|-------------------------------------------------|---------|---------|--------|---|---------|--------|
| IP04350 TBB4_HUMAN Tubulin beta-4 chain | 2  |                                              | LAVNMVPPFR                           | 252 | 10 | 15 | 101.43 | b2b5*b5y1y2y3y4y5y6y7*y7y8y9*y9y10              | 1143.63 | 72.994  | 161983 | 2 | 572.32  | -2.24  |
| IP04350 TBB4_HUMAN Tubulin beta-4 chain | 3  |                                              | IMNTFSVVPSPK                         | 162 | 12 | 7  | 64.53  | y4*y4y5y6y7y8y12                                | 1319.71 | 63.914  | 89853  | 2 | 660.36  | 2.41   |
| IP04350 TBB4_HUMAN Tubulin beta-4 chain | 4  | Carbamidomethyl+C(23)                        | LTTPTYGDLNHLVSATMSGVTTC LR           | 216 | 25 | 9  | 65.04  | y2y3y5y6y7y8y12y22y25                           | 2708.33 | 95.908  | 82625  | 3 | 903.45  | -2.43  |
| IP04350 TBB4_HUMAN Tubulin beta-4 chain | 5  | Carbamidomethyl+C(6); Carbamidomethyl+C(8)   | KEAESCDCQLQGFQLTHSLGGGTG SGMGTLLISK  | 121 | 33 | 5  | 13.42  | b3b22y4y7y33                                    | 3439.63 | 78.423  | 15018  | 3 | 1147.22 | 0.35   |
| IP04350 TBB4_HUMAN Tubulin beta-4 chain | 6  |                                              | MAATFIGNSTAIQELFK                    | 362 | 17 | 4  | 27.64  | b6y4y9y10                                       | 1841.97 | 116.875 | 41854  | 3 | 614.66  | 10.21  |
| IP04350 TBB4_HUMAN Tubulin beta-4 chain | 7  |                                              | INVYYNEATGGNYVPR                     | 46  | 16 | 3  | 17.33  | b12y5y13                                        | 1829.87 | 82.180  | 11536  | 2 | 915.44  | -4.54  |
| IP04350 TBB4_HUMAN Tubulin beta-4 chain | 8  |                                              | EEFPDR                               | 156 | 6  | 2  | 13.7   | y4*y4                                           | 792.34  | 37.708  | 4092   | 1 | 792.34  | -12.40 |
| IQ13509 TBB3_HUMAN Tubulin beta-3 chain | 1  |                                              | LAVNMVPPFR                           | 252 | 10 | 15 | 101.43 | b2b5*b5y1y2y3y4y5y6y7*y7y8y9*y9y10              | 1143.63 | 72.994  | 161983 | 2 | 572.32  | -2.24  |
| IQ13509 TBB3_HUMAN Tubulin beta-3 chain | 2  |                                              | IMNTFSVVPSPK                         | 162 | 12 | 7  | 64.53  | y4*y4y5y6y7y8y12                                | 1319.71 | 63.914  | 89853  | 2 | 660.36  | 2.41   |
| IQ13509 TBB3_HUMAN Tubulin beta-3 chain | 3  |                                              | FWEVISDEHGIDPSGNYVGDSDLQ LER         | 19  | 27 | 12 | 36.96  | b2b5b7*b7b8y2*y2y10° y10y11y18y27               | 3077.42 | 108.516 | 24974  | 4 | 770.11  | 3.57   |
| IQ13509 TBB3_HUMAN Tubulin beta-3 chain | 4  | Carbamidomethyl+C(10)                        | EIVHIQAGQCQGNQIGAK                   | 2   | 17 | 5  | 23.17  | b1b8b11y4y6                                     | 1822.90 | 61.126  | 8173   | 2 | 911.95  | -13.93 |
| IQ13509 TBB3_HUMAN Tubulin beta-3 chain | 5  |                                              | MSMKEVDEQMLAIQSK                     | 320 | 16 | 4  | 37.58  | b14b15y10y11                                    | 1867.91 | 88.927  | 2946   | 2 | 934.46  | 6.40   |
| IQ13509 TBB3_HUMAN Tubulin beta-3 chain | 6  |                                              | SGAFGLFRPDNFIFGQSGAGNN WAK           | 77  | 26 | 7  | 30.51  | b11b15y4y6y10*y10y13                            | 2795.34 | 98.261  | 2802   | 4 | 699.59  | -0.26  |
| IP06396 GELS_HUMAN Gelsolin             | 1  |                                              | AGALNSNDAFVLK                        | 584 | 13 | 9  | 34.72  | b3b11*b11b13*b13y9*y9y10y13                     | 1319.70 | 60.946  | 233124 | 2 | 660.35  | 3.79   |
| IP06396 GELS_HUMAN Gelsolin             | 2  |                                              | VPFDAATLHTSTAMAAQHGMDD DGTGQK        | 419 | 28 | 12 | 49.68  | b2b4b12b27y1y6°y6y10 y13y14y15y28               | 2873.27 | 57.198  | 163517 | 4 | 719.07  | -3.40  |
| IP06396 GELS_HUMAN Gelsolin             | 3  |                                              | NWRDPDQTDGLGLSYLSSHIANV ER           | 394 | 25 | 18 | 108.32 | b2b3b4b6b12*b12b14b16y3y4*y4y6y8y9y10y12y14y25  | 2843.35 | 78.685  | 143998 | 4 | 711.59  | -7.56  |
| IP06396 GELS_HUMAN Gelsolin             | 4  |                                              | AQPVVQVAEGSEPDGFWEALGGK              | 626 | 22 | 12 | 65.16  | b2*b2b3b4y2y3y4y8y11 y14y16y22                  | 2272.11 | 83.080  | 109334 | 2 | 1136.56 | 11.60  |
| IP06396 GELS_HUMAN Gelsolin             | 5  |                                              | QTQVSVLPEGGETPLFK                    | 373 | 17 | 10 | 43.17  | b13°b13*b13b16y2y4y10y12y13y17                  | 1829.98 | 73.422  | 104449 | 2 | 915.49  | 7.27   |
| IP06396 GELS_HUMAN Gelsolin             | 6  |                                              | AGKEPGLQIWR                          | 61  | 11 | 8  | 48.11  | b1b4b7y1y4y7y8y11                               | 1254.68 | 56.314  | 78842  | 3 | 418.90  | -12.84 |
| IP06396 GELS_HUMAN Gelsolin             | 7  |                                              | TGAQELLR                             | 615 | 8  | 5  | 41.1   | b2y4y6y7y8                                      | 887.48  | 41.538  | 77436  | 2 | 444.25  | -10.93 |
| IP06396 GELS_HUMAN Gelsolin             | 8  | Carbamidomethyl+C(16); Carbamidomethyl+C(29) | ATEVPVSWESFNNGDCFILDLGN NIHWQCGSNSNR | 199 | 35 | 18 | 96.82  | b2°b2b3°b3b4b8b11b13°b13y4y5y6y7y8y10y14 y15y35 | 4037.83 | 100.257 | 74802  | 3 | 1346.62 | 10.16  |
| IP06396 GELS_HUMAN Gelsolin             | 9  |                                              | TPSAAYLWVG TGASEAEK                  | 597 | 18 | 7  | 43.56  | b2b5b7b9b16y11y13                               | 1837.89 | 68.602  | 69146  | 2 | 919.45  | -1.53  |
| IP06396 GELS_HUMAN Gelsolin             | 10 | Carbamidomethyl+C(4)                         | SEDCFILDHGK                          | 327 | 11 | 4  | 36.27  | y3y4y5y11                                       | 1320.57 | 48.823  | 43863  | 3 | 440.86  | -10.63 |
| IP06396 GELS_HUMAN Gelsolin             | 11 |                                              | YIETDPANR                            | 729 | 9  | 6  | 38.49  | b2b9y4y5y7y9                                    | 1078.51 | 30.131  | 37777  | 2 | 539.76  | -4.64  |
| IP06396 GELS_HUMAN Gelsolin             | 12 |                                              | HVVPNEVVVQR                          | 177 | 11 | 8  | 82.5   | b3b7y4y7y8y9y10y11                              | 1275.72 | 38.475  | 31613  | 2 | 638.36  | -0.77  |
| IP06396 GELS_HUMAN Gelsolin             | 13 |                                              | AVEVLPK                              | 577 | 7  | 4  | 37.7   | b3y4y5y7                                        | 755.46  | 40.139  | 31605  | 2 | 378.23  | -10.34 |
| IP06396 GELS_HUMAN Gelsolin             | 14 |                                              | VSNGAGTMSVSLVADENPFAQGA LK           | 302 | 25 | 8  | 42.5   | b8b9b11b12b16y11y25*y25                         | 2463.24 | 83.142  | 10546  | 2 | 1232.12 | 6.84   |
| IP06396 GELS_HUMAN Gelsolin             | 15 |                                              | VHVSEEGTEPEAMLQVLGPKPAL PAGTEDITAK   | 257 | 32 | 4  | 11.19  | b2b3b9y8                                        | 3301.62 | 71.064  | 6874   | 3 | 1101.21 | -11.31 |

|                                                          |    |                                                      |                                             |     |    |    |       |                                                    |         |         |        |   |         |        |
|----------------------------------------------------------|----|------------------------------------------------------|---------------------------------------------|-----|----|----|-------|----------------------------------------------------|---------|---------|--------|---|---------|--------|
| [P06396]GELS_HUMAN Gelsolin                              | 16 |                                                      | TASDFITK                                    | 360 | 8  | 3  | 41.1  | y5y6y7                                             | 882.45  | 38.594  | 75867  | 2 | 441.73  | -6.02  |
| [P06396]GELS_HUMAN Gelsolin                              | 17 |                                                      | EVQGFESATFLGYFK                             | 147 | 15 | 6  | 52    | b7b12y3y9y10y11                                    | 1722.84 | 90.780  | 54549  | 2 | 861.92  | 2.91   |
| [P06396]GELS_HUMAN Gelsolin                              | 18 |                                                      | EPAHMLSLFGGKPMIYK                           | 530 | 18 | 4  | 15.73 | b4*b4b6y6                                          | 2032.03 | 80.071  | 47664  | 4 | 508.76  | -21.93 |
| [P06396]GELS_HUMAN Gelsolin                              | 19 |                                                      | GGVASGFK                                    | 169 | 8  | 4  | 54.41 | b3b7y3y5                                           | 722.37  | 62.879  | 2441   | 1 | 722.37  | -12.84 |
| [P06396]GELS_HUMAN Gelsolin                              | 20 |                                                      | IEGSNKVPVDPATYGFYGGDSYI<br>ILYNYR           | 451 | 30 | 11 | 81.14 | b7b10b25y3y4y5y9y11y<br>12y13y23                   | 3399.67 | 85.404  | 93666  | 3 | 1133.90 | 5.96   |
| [P06396]GELS_HUMAN Gelsolin                              | 21 |                                                      | KMDAHPPR                                    | 660 | 8  | 4  | 33.32 | b6b7y6*y6                                          | 951.48  | 99.357  | 10223  | 1 | 951.48  | -4.23  |
| [P06396]GELS_HUMAN Gelsolin                              | 22 |                                                      | EGGQTAPASTRLFQVR                            | 553 | 16 | 4  | 25.03 | b6b8b10*b10                                        | 1717.88 | 84.525  | 8157   | 2 | 859.44  | -11.16 |
| [P06396]GELS_HUMAN Gelsolin                              | 23 | Carbamidomethyl+C(16)<br>;Carbamidomethyl+C(29)<br>) | ATEVPSVSWESFNNGDCFILDLGN<br>NIHQWCGSNSNRYSR | 199 | 38 | 6  | 10.86 | b3*b3b7*b7y3*y3                                    | 4485.98 | 97.472  | 7558   | 4 | 1122.25 | -4.90  |
| [P06396]GELS_HUMAN Gelsolin                              | 24 | Phosphoryl STY(13)                                   | EVQGFESATFLGYFK                             | 147 | 15 | 3  | 24.34 | b12b13y12_HPO3 y12                                 | 1802.78 | 92.890  | 3442   | 2 | 901.89  | -7.52  |
| [P06396]GELS_HUMAN Gelsolin                              | 25 | Carbamidomethyl+C(16)<br>;Phosphoryl STY(10)         | NGNLQYDLHYWLGNECSQDESG<br>AAAIFTVQLDDYLNGR  | 104 | 38 | 9  | 26.7  | b4b8*b8*b8b9*b9y3y6y<br>9                          | 4426.94 | 112.264 | 3093   | 4 | 1107.49 | 3.86   |
| [P06396]GELS_HUMAN Gelsolin                              | 26 | Carbamidomethyl+C(2)                                 | DCFILDHGK                                   | 329 | 9  | 0  | 2.38  |                                                    | 1104.53 | 48.845  | 3920   | 2 | 552.77  | 9.84   |
| [Q13748]TBA3C_HUMAN Tubulin alpha-<br>3C/D chain         | 1  |                                                      | QLFHPEQLITGKEDAANNYAR                       | 84  | 21 | 8  | 53.21 | y3y5y6y9y10y12y21*y2<br>1                          | 2415.18 | 62.326  | 354393 | 4 | 604.55  | -8.79  |
| [Q13748]TBA3C_HUMAN Tubulin alpha-<br>3C/D chain         | 2  |                                                      | VGINYQPPTVVPGGDLAK                          | 352 | 18 | 15 | 69.5  | b1b5*b5b6*b6b10b11*b<br>11y1y2y3y7y8y12y18         | 1825.00 | 66.011  | 249834 | 2 | 913.00  | 5.75   |
| [Q13748]TBA3C_HUMAN Tubulin alpha-<br>3C/D chain         | 3  |                                                      | NLDIERPTYTNLNR                              | 215 | 14 | 11 | 40.18 | b2*b2b3b5*b5y7y10*y1<br>0y12*y12y14                | 1718.87 | 52.991  | 135862 | 3 | 573.63  | -8.45  |
| [Q13748]TBA3C_HUMAN Tubulin alpha-<br>3C/D chain         | 4  |                                                      | IHFPLATYAPVISA EK                           | 264 | 16 | 5  | 17.33 | b2b3b8y2y4                                         | 1756.94 | 78.557  | 95386  | 3 | 586.32  | -12.65 |
| [Q13748]TBA3C_HUMAN Tubulin alpha-<br>3C/D chain         | 5  | Carbamidomethyl+C(15)                                | AYHEQLSVAEITNACFEPANQMV<br>K                | 280 | 24 | 4  | 28.15 | y4y7y9y13                                          | 2750.32 | 73.693  | 53120  | 3 | 917.44  | 9.94   |
| [Q13748]TBA3C_HUMAN Tubulin alpha-<br>3C/D chain         | 6  |                                                      | LSVDYGKK                                    | 156 | 8  | 6  | 54.41 | b2y3y4y5y7y8                                       | 909.50  | 29.936  | 32828  | 2 | 455.25  | -9.13  |
| [Q13748]TBA3C_HUMAN Tubulin alpha-<br>3C/D chain         | 7  |                                                      | FDGALNVDLTFQTNLVPYPR                        | 243 | 21 | 13 | 76.54 | b2b3b4b17y2y3y4y5y6y<br>11*y11y14y21               | 2409.23 | 95.114  | 30203  | 2 | 1205.12 | 7.40   |
| [P04075]ALDOA_HUMAN Fructose-<br>bisphosphate aldolase A | 1  |                                                      | IGEHTPSALAIMENANVLAR                        | 153 | 20 | 10 | 61.79 | b5*b5b12y3y4y6y8y9y1<br>5y20                       | 2107.09 | 81.151  | 108135 | 3 | 703.04  | -1.16  |
| [P04075]ALDOA_HUMAN Fructose-<br>bisphosphate aldolase A | 2  | Carbamidomethyl+C(5)                                 | YASICQQNGIVPIVEPEILPDGDHD<br>LKR            | 173 | 28 | 16 | 98.86 | b9b10*b10b11*b11y1y2<br>y3y5y7y8y9y10y13y17y<br>28 | 3176.59 | 76.476  | 95521  | 4 | 794.90  | -5.99  |
| [P04075]ALDOA_HUMAN Fructose-<br>bisphosphate aldolase A | 3  |                                                      | GILAADESTGSI AK                             | 28  | 14 | 6  | 39.39 | b4b8y9y11y12y14                                    | 1332.71 | 48.840  | 65581  | 2 | 666.86  | 3.57   |
| [P04075]ALDOA_HUMAN Fructose-<br>bisphosphate aldolase A | 4  | Carbamidomethyl+C(25)                                | ALSDHHIYLEGTLKPNMVT<br>PGHACTQK             | 215 | 28 | 5  | 17.48 | b5y1y4y8y13                                        | 3131.54 | 62.510  | 52694  | 5 | 627.11  | -12.47 |
| [P04075]ALDOA_HUMAN Fructose-<br>bisphosphate aldolase A | 5  |                                                      | LQSIGTENTEENRR                              | 43  | 14 | 12 | 39.39 | b2*b2b8b10*b10y10*y1<br>0y12*y12y13*y13y14         | 1646.79 | 29.517  | 43523  | 3 | 549.60  | -10.60 |
| [P04075]ALDOA_HUMAN Fructose-<br>bisphosphate aldolase A | 6  |                                                      | AAQEYVYKR                                   | 322 | 9  | 6  | 54.8  | y2y3y4y5y6y9                                       | 1093.56 | 20.271  | 9322   | 2 | 547.28  | -3.35  |
| [P04075]ALDOA_HUMAN Fructose-<br>bisphosphate aldolase A | 7  | Carbamidomethyl+C(4)                                 | VNPCIGGVILFHETLYQK                          | 69  | 18 | 4  | 15.73 | b9*b9y7y9                                          | 2088.08 | 79.909  | 31248  | 3 | 696.70  | -5.61  |
| [P04075]ALDOA_HUMAN Fructose-<br>bisphosphate aldolase A | 8  | Carbamidomethyl+C(1)                                 | CPLLKPWALTFYSYGR                            | 289 | 15 | 3  | 18.32 | b3y3y6                                             | 1808.94 | 86.229  | 18303  | 3 | 603.65  | -6.55  |
| [P04075]ALDOA_HUMAN Fructose-<br>bisphosphate aldolase A | 9  |                                                      | MPYQYPALTPEQK                               | 0   | 13 | 4  | 20.83 | b3y4*y4y7                                          | 1565.76 | 55.593  | 3500   | 2 | 783.38  | -6.47  |
| [P04075]ALDOA_HUMAN Fructose-<br>bisphosphate aldolase A | 10 | Carbamidomethyl+C(24)                                | GVVPLAGTNGETTTQGLDGLSER<br>CAQYK            | 111 | 28 | 3  | 11.78 | b12y5y10                                           | 2922.39 | 119.488 | 3231   | 3 | 974.80  | -12.61 |
| [P04075]ALDOA_HUMAN Fructose-<br>bisphosphate aldolase A | 11 | Phosphoryl STY(11)                                   | GILAADESTGSI AKR                            | 28  | 15 | 6  | 55.72 | y3y4y5*y5y6y13                                     | 1568.75 | 71.419  | 4478   | 2 | 784.88  | -3.74  |



|                                                      |    |                                           |                                 |     |    |    |        |                                                                                          |         |         |        |   |         |        |
|------------------------------------------------------|----|-------------------------------------------|---------------------------------|-----|----|----|--------|------------------------------------------------------------------------------------------|---------|---------|--------|---|---------|--------|
| [P04075]ALDOA_HUMAN Fructose-bisphosphate aldolase A | 12 | Phosphoryl STY(8)                         | GVVPLAGTNGETTTQGLDGLSER         | 111 | 23 | 16 | 90.76  | b3b4b8_H3PO4<br>b8b10_H3PO4<br>b10*b10b11_H3PO4<br>b11b12*b12y7*y7y8*y8<br>y10*y10y13y14 | 2352.08 | 136.370 | 3081   | 2 | 1176.54 | -8.82  |
| [P04075]ALDOA_HUMAN Fructose-bisphosphate aldolase A | 13 | Oxidation+M(1)                            | MPYQYPALTPEQK                   | 0   | 13 | 3  | 20.83  | b11y10y12                                                                                | 1581.75 | 76.344  | 3804   | 2 | 791.38  | -5.71  |
| [P04075]ALDOA_HUMAN Fructose-bisphosphate aldolase A | 14 | Carbamidomethyl+C(25)<br>;Oxidation+M(18) | ALSDHHIYLEGTLKPNMVT<br>PGHACTQK | 215 | 28 | 8  | 29.97  | b3*b3b4b6b10y8*y8y12                                                                     | 3147.54 | 124.405 | 3712   | 3 | 1049.85 | -9.54  |
| [P04075]ALDOA_HUMAN Fructose-bisphosphate aldolase A | 15 |                                           | QEEYVVKR                        | 324 | 7  | 0  | 1.59   |                                                                                          | 951.49  | 20.286  | 3725   | 2 | 476.25  | -3.40  |
| [P04075]ALDOA_HUMAN Fructose-bisphosphate aldolase A | 16 |                                           | AQEEYVVKR                       | 323 | 8  | 0  | 1.59   |                                                                                          | 1022.52 | 20.297  | 3013   | 2 | 511.77  | -3.76  |
| [P04075]ALDOA_HUMAN Fructose-bisphosphate aldolase A | 17 |                                           | SIGTENTEENRR                    | 45  | 12 | 0  | 3.57   |                                                                                          | 1405.67 | 29.492  | 2538   | 2 | 703.34  | -0.26  |
| [Q13885]TBB2A_HUMAN Tubulin beta-2A chain            | 1  |                                           | SGPFGQIFRPDNFVFGQSGAGNN<br>WAK  | 77  | 26 | 13 | 41.26  | b2*b2b13b14b17y1y2y6<br>y9y12*y12y14y26                                                  | 2798.36 | 90.206  | 180420 | 3 | 933.46  | 6.19   |
| [Q13885]TBB2A_HUMAN Tubulin beta-2A chain            | 2  |                                           | LAVNMVPPFR                      | 252 | 10 | 15 | 101.43 | b2b5*b5y1y2y3y4y5y6y<br>7*y7y8y9*y9y10                                                   | 1143.63 | 72.994  | 161983 | 2 | 572.32  | -2.24  |
| [Q13885]TBB2A_HUMAN Tubulin beta-2A chain            | 3  | Carbamidomethyl+C(23)                     | LTTPTYGDLNHLVSATMSGVTTC<br>LR   | 216 | 25 | 9  | 65.04  | y2y3y5y6y7y8y12y22y2<br>5                                                                | 2708.33 | 95.908  | 82625  | 3 | 903.45  | -2.43  |
| [Q13885]TBB2A_HUMAN Tubulin beta-2A chain            | 4  | Carbamidomethyl+C(10)                     | EIVHIQAGQCGNQIGAK               | 2   | 17 | 5  | 23.17  | b1b8b11y4y6                                                                              | 1822.90 | 61.126  | 8173   | 2 | 911.95  | -13.93 |
| [Q13885]TBB2A_HUMAN Tubulin beta-2A chain            | 5  |                                           | MSATFIGNSTAIQELFKR              | 362 | 18 | 5  | 24.66  | b6b7b14*b14y2                                                                            | 2014.07 | 69.704  | 4559   | 2 | 1007.54 | 11.64  |
| [Q13885]TBB2A_HUMAN Tubulin beta-2A chain            | 6  |                                           | INVYYNEAAGNK                    | 46  | 12 | 3  | 29.68  | b5b10b11                                                                                 | 1355.64 | 75.526  | 3770   | 3 | 452.55  | -16.57 |
| [Q13885]TBB2A_HUMAN Tubulin beta-2A chain            | 7  |                                           | INVYYNEAAGNKYVPR                | 46  | 16 | 3  | 25.03  | b3b8b13                                                                                  | 1870.94 | 60.413  | 8219   | 2 | 935.97  | -2.74  |
| [Q13885]TBB2A_HUMAN Tubulin beta-2A chain            | 8  |                                           | RISEQFTAMFR                     | 379 | 11 | 3  | 24.51  | b7y3y9                                                                                   | 1385.68 | 64.834  | 3334   | 3 | 462.57  | -11.98 |
| [Q13885]TBB2A_HUMAN Tubulin beta-2A chain            | 9  |                                           | GSQQYRALTVPELTQQMFDISK          | 276 | 21 | 3  | 14.01  | b5b12y10                                                                                 | 2427.19 | 105.205 | 1609   | 2 | 1214.10 | -3.32  |
| [Q9BVA1]TBB2B_HUMAN Tubulin beta-2B chain            | 1  |                                           | SGPFGQIFRPDNFVFGQSGAGNN<br>WAK  | 77  | 26 | 13 | 41.26  | b2*b2b13b14b17y1y2y6<br>y9y12*y12y14y26                                                  | 2798.36 | 90.206  | 180420 | 3 | 933.46  | 6.19   |
| [Q9BVA1]TBB2B_HUMAN Tubulin beta-2B chain            | 2  |                                           | LAVNMVPPFR                      | 252 | 10 | 15 | 101.43 | b2b5*b5y1y2y3y4y5y6y<br>7*y7y8y9*y9y10                                                   | 1143.63 | 72.994  | 161983 | 2 | 572.32  | -2.24  |
| [Q9BVA1]TBB2B_HUMAN Tubulin beta-2B chain            | 3  | Carbamidomethyl+C(23)                     | LTTPTYGDLNHLVSATMSGVTTC<br>LR   | 216 | 25 | 9  | 65.04  | y2y3y5y6y7y8y12y22y2<br>5                                                                | 2708.33 | 95.908  | 82625  | 3 | 903.45  | -2.43  |
| [Q9BVA1]TBB2B_HUMAN Tubulin beta-2B chain            | 4  | Carbamidomethyl+C(10)                     | EIVHIQAGQCGNQIGAK               | 2   | 17 | 5  | 23.17  | b1b8b11y4y6                                                                              | 1822.90 | 61.126  | 8173   | 2 | 911.95  | -13.93 |
| [Q9BVA1]TBB2B_HUMAN Tubulin beta-2B chain            | 5  |                                           | MSATFIGNSTAIQELFKR              | 362 | 18 | 5  | 24.66  | b6b7b14*b14y2                                                                            | 2014.07 | 69.704  | 4559   | 2 | 1007.54 | 11.64  |
| [Q9BVA1]TBB2B_HUMAN Tubulin beta-2B chain            | 6  |                                           | INVYYNEATGNK                    | 46  | 12 | 3  | 22.48  | b5b10y7                                                                                  | 1385.70 | 72.059  | 6946   | 2 | 693.35  | 18.76  |
| [Q9BVA1]TBB2B_HUMAN Tubulin beta-2B chain            | 7  | Oxidation+M()                             | IMNTFSVMPSPK                    | 162 | 12 | 7  | 45.2   | b4*b4b6*b6b7*b7b11                                                                       | 1367.69 | 87.443  | 10981  | 2 | 684.35  | 11.69  |
| [Q9NY65]TBA8_HUMAN Tubulin alpha-8 chain             | 1  |                                           | QLFHPEQLITGKEDAANNYAR           | 84  | 21 | 8  | 53.21  | y3y5y6y9y10y12y21*y2<br>1                                                                | 2415.18 | 62.326  | 354393 | 4 | 604.55  | -8.79  |
| [Q9NY65]TBA8_HUMAN Tubulin alpha-8 chain             | 2  |                                           | VGINYQPPTVPPGGDLAK              | 352 | 18 | 15 | 69.5   | b1b5*b5b6*b6b10b11*b<br>11y1y2y3y7y8y12y18                                               | 1825.00 | 66.011  | 249834 | 2 | 913.00  | 5.75   |

|                                                    |    |                       |                                          |      |    |    |        |                                                                       |         |         |         |   |         |        |
|----------------------------------------------------|----|-----------------------|------------------------------------------|------|----|----|--------|-----------------------------------------------------------------------|---------|---------|---------|---|---------|--------|
| Q9NY65 TBA8_HUMAN Tubulin alpha-8 chain            | 3  |                       | NLDIERPTYTNLNR                           | 215  | 14 | 11 | 40.18  | b2*b2b3b5*b5y7y10*y10y12*y12y14                                       | 1718.87 | 52.991  | 135862  | 3 | 573.63  | -8.45  |
| Q9NY65 TBA8_HUMAN Tubulin alpha-8 chain            | 4  |                       | FDGALNVDLTEFQTNLVPYPR                    | 243  | 21 | 13 | 76.54  | b2b3b4b17y2y3y4y5y6y11*y11y14y21                                      | 2409.23 | 95.114  | 30203   | 2 | 1205.12 | 7.40   |
| Q9NY65 TBA8_HUMAN Tubulin alpha-8 chain            | 5  |                       | LISQIVSSITASLR                           | 229  | 14 | 4  | 27.84  | b4b6y4y8                                                              | 1487.89 | 100.447 | 13968   | 2 | 744.45  | 5.17   |
| Q9NY65 TBA8_HUMAN Tubulin alpha-8 chain            | 6  |                       | AGTYR                                    | 79   | 5  | 2  | 26.61  | b4y3                                                                  | 567.29  | 35.863  | 50180   | 1 | 567.29  | 6.13   |
| Q9NY65 TBA8_HUMAN Tubulin alpha-8 chain            | 7  | Carbamidomethyl+C(8)  | TIQFVDWCPTGFK                            | 339  | 13 | 9  | 67.56  | b4b5*b5y4*y4y5y6y7*y7                                                 | 1598.73 | 26.882  | 13561   | 3 | 533.58  | -21.30 |
| Q9NY65 TBA8_HUMAN Tubulin alpha-8 chain            | 8  |                       | INDDSFSTFFSETGNKG                        | 42   | 18 | 4  | 22.89  | y5y7*y7y9                                                             | 1994.89 | 79.019  | 9435    | 2 | 997.95  | 16.34  |
| Q9NY65 TBA8_HUMAN Tubulin alpha-8 chain            | 9  |                       | GHYTVGKESIDLVLDR                         | 105  | 16 | 3  | 25.7   | b4b10b11                                                              | 1801.94 | 85.009  | 4135    | 2 | 901.47  | -1.76  |
| Q9NY65 TBA8_HUMAN Tubulin alpha-8 chain            | 10 | Oxidation+M(3)        | AVMIDLEPTVVDEVR                          | 64   | 15 | 3  | 24.34  | b5b6y4                                                                | 1701.86 | 76.874  | 4065    | 2 | 851.43  | -8.18  |
| Q6PEY2 TBA3E_HUMAN Tubulin alpha-3E chain          | 1  |                       | VGINYQPPTVPPGGDLAK                       | 352  | 18 | 15 | 69.5   | b1b5*b5b6*b6b10b11*b11y1y2y3y7y8y12y18                                | 1825.00 | 66.011  | 249834  | 2 | 913.00  | 5.75   |
| Q6PEY2 TBA3E_HUMAN Tubulin alpha-3E chain          | 2  |                       | NLDIERPTYTNLNR                           | 215  | 14 | 11 | 40.18  | b2*b2b3b5*b5y7y10*y10y12*y12y14                                       | 1718.87 | 52.991  | 135862  | 3 | 573.63  | -8.45  |
| Q6PEY2 TBA3E_HUMAN Tubulin alpha-3E chain          | 3  |                       | IHFPLATYAPVISA EK                        | 264  | 16 | 5  | 17.33  | b2b3b8y2y4                                                            | 1756.94 | 78.557  | 95386   | 3 | 586.32  | -12.65 |
| Q6PEY2 TBA3E_HUMAN Tubulin alpha-3E chain          | 4  | Carbamidomethyl+C(15) | AYHEQLSVAEITNACFEPANQMV K                | 280  | 24 | 4  | 28.15  | y4y7y9y13                                                             | 2750.32 | 73.693  | 53120   | 3 | 917.44  | 9.94   |
| Q6PEY2 TBA3E_HUMAN Tubulin alpha-3E chain          | 5  |                       | FDGALNVDLTEFQTNLVPYPR                    | 243  | 21 | 13 | 76.54  | b2b3b4b17y2y3y4y5y6y11*y11y14y21                                      | 2409.23 | 95.114  | 30203   | 2 | 1205.12 | 7.40   |
| Q6PEY2 TBA3E_HUMAN Tubulin alpha-3E chain          | 6  | Carbamidomethyl+C(5)  | LADLCTGLQGFLIFHSFGGGTGSG FASLLMER        | 124  | 32 | 5  | 18.5   | b7b13y3y10y13                                                         | 3359.65 | 120.936 | 56342   | 4 | 840.67  | -2.40  |
| Q6PEY2 TBA3E_HUMAN Tubulin alpha-3E chain          | 7  | Carbamidomethyl+C(5)  | LADLCTGLQGFLIFHSFGGGTGSG FASLLMERLSVDYSK | 124  | 39 | 9  | 41.16  | b3b6b7b9b10*b10b12y5y10                                               | 4152.02 | 108.595 | 3138    | 4 | 1038.76 | -8.94  |
| A5A3E0 A26CB_HUMAN ANKRD26-like family C member 1B | 1  |                       | SYELPDGQVITIGNER                         | 938  | 16 | 25 | 199.45 | b2b3b8b9*b9b10b11*b11b12*b12y3*y3y4y5y6*y6y7y8y10*y10y11y12*y12y13y16 | 1790.90 | 71.671  | 2789179 | 2 | 895.96  | 7.02   |
| A5A3E0 A26CB_HUMAN ANKRD26-like family C member 1B | 2  |                       | AGFAGDDAPR                               | 718  | 10 | 17 | 127.24 | b2b3b4b8y1y2y3y4*y4y5y6*y6y7*y7y8y9y10                                | 976.45  | 31.456  | 1944071 | 2 | 488.73  | -3.06  |
| A5A3E0 A26CB_HUMAN ANKRD26-like family C member 1B | 3  |                       | AVFPSIVGRPR                              | 728  | 11 | 14 | 114.34 | b1b2b9y1y2y3y4y5y6y7y8y9y10y11                                        | 1198.71 | 56.275  | 885373  | 2 | 599.86  | 1.63   |
| A5A3E0 A26CB_HUMAN ANKRD26-like family C member 1B | 4  |                       | QEYDESGPSIVHRK                           | 1059 | 14 | 24 | 175.06 | b3*b3b4*b4*b4b5b7*b7b14y2y3y4y5y6*y6y7y8y9y10*y10y11y12y14*y14        | 1644.78 | 32.248  | 414928  | 3 | 548.93  | -11.87 |
| A5A3E0 A26CB_HUMAN ANKRD26-like family C member 1B | 5  |                       | QEYDESGPSIVHR                            | 1059 | 13 | 6  | 78.23  | y3y4y5y6y8y11                                                         | 1516.70 | 38.099  | 279257  | 3 | 506.24  | -0.32  |
| A5A3E0 A26CB_HUMAN ANKRD26-like family C member 1B | 6  |                       | ISSENSNPEQDLK                            | 367  | 13 | 9  | 58.9   | y4*y4y5y7*y7y9*y9y10*y10                                              | 1460.67 | 54.440  | 28062   | 3 | 487.56  | -11.28 |
| A5A3E0 A26CB_HUMAN ANKRD26-like family C member 1B | 7  | Carbamidomethyl+C(2)  | LCYVALDFEQEMATVASSSLEK                   | 915  | 23 | 8  | 53.15  | b3y3y6y9*y9y10y11y14                                                  | 2578.26 | 117.717 | 19677   | 3 | 860.09  | 21.02  |

|                                                         |    |                                           |                                 |      |    |    |        |                                                  |         |         |       |   |         |        |
|---------------------------------------------------------|----|-------------------------------------------|---------------------------------|------|----|----|--------|--------------------------------------------------|---------|---------|-------|---|---------|--------|
| A5A3E0 A26CB_HUMAN ANKRD26-like family C member 1B      | 8  |                                           | YSVWVGGSILASLSTFQQMWISK         | 1036 | 23 | 7  | 34.28  | b4b6b8b13y3y7°y7                                 | 2588.29 | 52.269  | 11144 | 2 | 1294.65 | -12.92 |
| A5A3E0 A26CB_HUMAN ANKRD26-like family C member 1B      | 9  |                                           | AAWWGK                          | 145  | 6  | 2  | 30.02  | y3y5                                             | 718.38  | 35.397  | 6023  | 1 | 718.38  | 14.87  |
| A5A3E0 A26CB_HUMAN ANKRD26-like family C member 1B      | 10 | Carbamidomethyl+C(25)                     | ALQLNELTMDDDTAVLVIDNGSGMCK      | 692  | 26 | 3  | 12.23  | b3y9y14                                          | 2823.38 | 94.945  | 3378  | 3 | 941.80  | 19.89  |
| A5A3E0 A26CB_HUMAN ANKRD26-like family C member 1B      | 11 |                                           | DLYTNTVLSGGTMYPGMAHR            | 991  | 21 | 3  | 14.01  | b12y4y6                                          | 2285.03 | 68.227  | 1707  | 2 | 1143.02 | -16.56 |
| A5A3E0 A26CB_HUMAN ANKRD26-like family C member 1B      | 12 | Carbamidomethyl+C(4)                      | EKLCYVALDFEQEMATVASSSSLEK       | 913  | 25 | 7  | 28.35  | b5°b5b9b10b22y10°y10                             | 2835.36 | 97.273  | 30133 | 3 | 945.79  | 4.74   |
| A5A3E0 A26CB_HUMAN ANKRD26-like family C member 1B      | 13 | Phosphoryl STY()                          | TPESQQFPDTENEEYHSDEQNDTQK       | 576  | 25 | 7  | 23.01  | b4b6b9_H3PO4<br>b9y6*y6y14*y14                   | 3076.21 | 57.138  | 78085 | 4 | 769.81  | 7.14   |
| A5A3E0 A26CB_HUMAN ANKRD26-like family C member 1B      | 14 | Phosphoryl STY()                          | KDLIVMLRDTDVNK                  | 154  | 14 | 7  | 45.62  | b11b12_H3PO4<br>b12y4*y4y10y12*y12               | 1739.84 | 84.559  | 22852 | 2 | 870.42  | -14.52 |
| A5A3E0 A26CB_HUMAN ANKRD26-like family C member 1B      | 15 | Carbamidomethyl+C(9);<br>Phosphoryl STY() | MNSELSLCK                       | 629  | 10 | 4  | 55.2   | y4y5y7y9                                         | 1248.47 | 92.883  | 8565  | 2 | 624.74  | -14.86 |
| A5A3E0 A26CB_HUMAN ANKRD26-like family C member 1B      | 16 | Phosphoryl STY(10)                        | EKDILHENSTLREEIAMLR             | 640  | 19 | 5  | 29.73  | b4b9b12y7y11                                     | 2377.15 | 86.035  | 1841  | 2 | 1189.08 | 1.44   |
| A5A3E0 A26CB_HUMAN ANKRD26-like family C member 1B      | 17 | Oxidation+M()                             | QQGMMGGMHQKESYVGKEAQS<br>K      | 739  | 22 | 3  | 20.08  | y10y16y19                                        | 2455.15 | 79.964  | 2560  | 3 | 819.05  | 12.13  |
| A5A3E0 A26CB_HUMAN ANKRD26-like family C member 1B      | 18 | Oxidation+M()                             | DLYTNTVLSGGTMYPGMAHR            | 991  | 21 | 3  | 22.46  | b3y5y6                                           | 2301.08 | 84.497  | 1623  | 2 | 1151.04 | 7.00   |
| A5A3E0 A26CB_HUMAN ANKRD26-like family C member 1B      | 19 |                                           | ENSNPEQDLK                      | 370  | 10 | 1  | 7.45   | b5                                               | 1173.52 | 54.356  | 11706 | 2 | 587.27  | -12.07 |
| P00918 CAH2_HUMAN Carbonic anhydrase 2                  | 1  |                                           | EPISVSSEQVLK                    | 212  | 12 | 6  | 37.54  | b4°b4b9b11y2y3                                   | 1315.72 | 63.955  | 27539 | 2 | 658.36  | 6.03   |
| P00918 CAH2_HUMAN Carbonic anhydrase 2                  | 2  |                                           | AVQQPDGLAVLGIFLK                | 132  | 16 | 6  | 38.22  | b2b4y5y6y8y12                                    | 1668.98 | 106.826 | 13048 | 2 | 834.99  | 6.29   |
| P00918 CAH2_HUMAN Carbonic anhydrase 2                  | 3  |                                           | YAAELHLVHWNTKYGDFGK             | 113  | 19 | 4  | 22.87  | b12°b12y3y4                                      | 2249.09 | 73.525  | 97906 | 2 | 1125.05 | -9.12  |
| P00918 CAH2_HUMAN Carbonic anhydrase 2                  | 4  |                                           | GKSADFTNFDPR                    | 169  | 12 | 5  | 36.45  | b10b11°b11y5y11                                  | 1354.65 | 52.313  | 29294 | 2 | 677.83  | 7.30   |
| P00918 CAH2_HUMAN Carbonic anhydrase 2                  | 5  |                                           | QSPVDIDTHTAKYDPSLKPLSVSYDQATSLR | 27   | 31 | 5  | 16.32  | b5b9b11°b11y6                                    | 3432.73 | 99.393  | 5314  | 3 | 1144.91 | -0.78  |
| Q01518 CAP1_HUMAN Adenylyl cyclase-associated protein 1 | 1  |                                           | AGAAPYVQAFDSSLAGPVAEYLK         | 37   | 23 | 18 | 158.54 | b2b3b4b5b6b7b8b10b1<br>3b15y2y3y4y5y7y8y9y2<br>3 | 2351.23 | 115.840 | 56079 | 3 | 784.41  | 0.21   |
| Q01518 CAP1_HUMAN Adenylyl cyclase-associated protein 1 | 2  |                                           | LSDLLAPISEQIK                   | 100  | 13 | 3  | 20.83  | b3b5y7                                           | 1426.82 | 77.854  | 50126 | 2 | 713.91  | 4.11   |
| Q01518 CAP1_HUMAN Adenylyl cyclase-associated protein 1 | 3  | Carbamidomethyl+C(9)                      | ALLVTASQCQQAENK                 | 84   | 16 | 9  | 70.09  | b3b4b11b14y3y5y9y12y<br>16                       | 1757.89 | 43.995  | 44990 | 2 | 879.45  | 4.03   |
| Q01518 CAP1_HUMAN Adenylyl cyclase-associated protein 1 | 4  |                                           | VENQENVSNLVIETELK               | 330  | 18 | 9  | 68.92  | b9b14y4y6y7y8y11y15y<br>18                       | 2073.05 | 70.503  | 40752 | 2 | 1037.03 | 8.01   |
| Q01518 CAP1_HUMAN Adenylyl cyclase-associated protein 1 | 5  |                                           | EMNDAAMFYTNR                    | 155  | 12 | 4  | 29.68  | y5y6y11y12                                       | 1462.62 | 57.943  | 27297 | 2 | 731.81  | 7.85   |
| Q01518 CAP1_HUMAN Adenylyl cyclase-associated protein 1 | 6  |                                           | LEAVSHTSDMHR                    | 17   | 12 | 6  | 53.07  | b2b5y3y4y7y8                                     | 1382.63 | 25.565  | 20328 | 3 | 461.55  | -10.06 |

|                                                         |    |                       |                                                 |     |    |    |       |                                                                                              |         |         |        |   |         |        |
|---------------------------------------------------------|----|-----------------------|-------------------------------------------------|-----|----|----|-------|----------------------------------------------------------------------------------------------|---------|---------|--------|---|---------|--------|
| Q01518 CAP1_HUMAN Adenylyl cyclase-associated protein 1 | 7  |                       | SGPKPFSAPKPQTSPSPK                              | 294 | 18 | 6  | 15.73 | b1b5y4 <sup>°</sup> y4y8y18                                                                  | 1837.96 | 34.728  | 10032  | 3 | 613.33  | -9.30  |
| Q01518 CAP1_HUMAN Adenylyl cyclase-associated protein 1 | 8  | Carbamidomethyl+C(5)  | NSLDCEIVSAK                                     | 422 | 11 | 4  | 50.83 | y3y4y8y9                                                                                     | 1235.60 | 47.072  | 71785  | 2 | 618.30  | 2.07   |
| Q01518 CAP1_HUMAN Adenylyl cyclase-associated protein 1 | 9  |                       | LFNHLSAVSESIQALGWVAMAPK<br>PGPYVK               | 126 | 29 | 4  | 22.29 | b4b5b11y6                                                                                    | 3110.64 | 98.512  | 19386  | 3 | 1037.55 | -4.63  |
| Q01518 CAP1_HUMAN Adenylyl cyclase-associated protein 1 | 10 |                       | EVITFR                                          | 113 | 6  | 1  | 13.7  | b3                                                                                           | 764.42  | 52.053  | 15841  | 1 | 764.42  | -8.54  |
| Q01518 CAP1_HUMAN Adenylyl cyclase-associated protein 1 | 11 | Carbamidomethyl+C(9)  | INSITVDNCK                                      | 366 | 10 | 3  | 34.11 | y4y6y7                                                                                       | 1163.58 | 35.567  | 7903   | 2 | 582.29  | 5.98   |
| Q01518 CAP1_HUMAN Adenylyl cyclase-associated protein 1 | 12 | Carbamidomethyl+C(9)  | ALLVTASQCQQAENKLSDLLAPI<br>SEQIK                | 84  | 29 | 5  | 35.78 | b3b4b11y7y8                                                                                  | 3165.70 | 89.841  | 68979  | 3 | 1055.91 | 5.71   |
| Q01518 CAP1_HUMAN Adenylyl cyclase-associated protein 1 | 13 |                       | LEAVSHTSDMHRGYADSPSK                            | 17  | 20 | 7  | 39.28 | b3b12b16y8y9y13 <sup>°</sup> y13                                                             | 2188.02 | 63.726  | 25032  | 3 | 730.01  | 7.36   |
| Q01518 CAP1_HUMAN Adenylyl cyclase-associated protein 1 | 14 | Carbamidomethyl+C(12) | LERALLVTASQCQQAENK                              | 81  | 19 | 7  | 42.83 | y3y5 <sup>°</sup> y5y6y13 <sup>°</sup> y13y15                                                | 2156.09 | 91.578  | 6395   | 3 | 719.37  | -12.23 |
| Q01518 CAP1_HUMAN Adenylyl cyclase-associated protein 1 | 15 |                       | QENVSNLVIEDTELK                                 | 333 | 15 | 0  | 5.16  |                                                                                              | 1730.88 | 70.435  | 43653  | 2 | 865.94  | -0.63  |
| Q01518 CAP1_HUMAN Adenylyl cyclase-associated protein 1 | 16 |                       | AVSHTSDMHR                                      | 19  | 10 | 2  | 7.63  | b5 <sup>°</sup> b5                                                                           | 1140.53 | 25.538  | 3794   | 3 | 380.85  | 5.67   |
| Q01518 CAP1_HUMAN Adenylyl cyclase-associated protein 1 | 17 |                       | SDLLAPISEQIK                                    | 101 | 12 | 1  | 7.45  | b5                                                                                           | 1313.72 | 77.810  | 2964   | 2 | 657.37  | -5.58  |
| P00488 F13A_HUMAN Coagulation factor XIII A chain       | 1  |                       | GTYPVPIVSELQSGK                                 | 114 | 16 | 14 | 85.99 | b3 <sup>°</sup> b3b4b11y3y4 <sup>°</sup> y4y7 <sup>°</sup><br>y7y8y10y12 <sup>°</sup> y12y16 | 1687.94 | 84.515  | 119577 | 2 | 844.47  | 6.94   |
| P00488 F13A_HUMAN Coagulation factor XIII A chain       | 2  |                       | STVLTIPEIIK                                     | 624 | 12 | 8  | 64.53 | b2 <sup>°</sup> b2y2y4y6y8y9y10                                                              | 1326.82 | 89.229  | 103537 | 2 | 663.91  | -1.56  |
| P00488 F13A_HUMAN Coagulation factor XIII A chain       | 3  |                       | LIASMSSDSL                                      | 705 | 11 | 11 | 70.44 | b2b9b10y1y3y6y7 <sup>°</sup> y7y9 <sup>°</sup><br>y9y11                                      | 1179.60 | 50.592  | 89427  | 2 | 590.30  | -2.90  |
| P00488 F13A_HUMAN Coagulation factor XIII A chain       | 4  |                       | LALETALMYGAK                                    | 492 | 12 | 5  | 32.69 | y2y4y9y11y12                                                                                 | 1280.69 | 74.369  | 80879  | 2 | 640.85  | 2.29   |
| P00488 F13A_HUMAN Coagulation factor XIII A chain       | 5  |                       | AVPPNNSNAEEDLPTVELQGVV<br>PR                    | 13  | 25 | 8  | 32.33 | b3b4b14b16y2y5y14y25                                                                         | 2602.31 | 75.427  | 72521  | 3 | 868.11  | -1.41  |
| P00488 F13A_HUMAN Coagulation factor XIII A chain       | 6  |                       | DGTHVVENVDATHIGK                                | 447 | 16 | 8  | 45.4  | b4 <sup>°</sup> b4b10y2y3y4y7y11                                                             | 1691.82 | 40.621  | 56645  | 3 | 564.61  | -8.08  |
| P00488 F13A_HUMAN Coagulation factor XIII A chain       | 7  | Carbamidomethyl+C(14) | NPETDTYILFNPWCEDDAVYLDN<br>EKER                 | 175 | 27 | 7  | 17.95 | b2b3y6y8 <sup>°</sup> y8y11y27                                                               | 3346.44 | 87.857  | 51279  | 4 | 837.36  | -14.30 |
| P00488 F13A_HUMAN Coagulation factor XIII A chain       | 8  | Carbamidomethyl+C(1)  | CGPASVQAIK                                      | 409 | 10 | 11 | 87.33 | b2b3b5y1y2y4y6y7y8y9<br>y10                                                                  | 1030.53 | 35.350  | 40371  | 2 | 515.77  | -2.49  |
| P00488 F13A_HUMAN Coagulation factor XIII A chain       | 9  |                       | EREYVLDIGVIFYGEVNDIK                            | 200 | 22 | 10 | 36.77 | b2b7b8b20 <sup>°</sup> b20y1y10y1<br>2y15y22                                                 | 2614.33 | 90.134  | 37469  | 3 | 872.11  | 9.62   |
| P00488 F13A_HUMAN Coagulation factor XIII A chain       | 10 |                       | LSIQSSPK                                        | 144 | 8  | 7  | 65.95 | b5y2y3y4y6y7y8                                                                               | 859.48  | 31.672  | 37023  | 2 | 430.24  | -7.53  |
| P00488 F13A_HUMAN Coagulation factor XIII A chain       | 11 |                       | MYVAVWTPYGVL                                    | 159 | 13 | 6  | 48.69 | b3b4b5y1y3y7                                                                                 | 1554.82 | 91.441  | 33638  | 2 | 777.91  | 5.26   |
| P00488 F13A_HUMAN Coagulation factor XIII A chain       | 12 |                       | VEYVIGR                                         | 101 | 7  | 3  | 37.7  | b3y5y6                                                                                       | 835.46  | 43.149  | 20635  | 2 | 418.23  | -6.65  |
| P00488 F13A_HUMAN Coagulation factor XIII A chain       | 13 |                       | FQEQQEER                                        | 483 | 9  | 11 | 54.8  | b2 <sup>°</sup> b2y1y2y3y5 <sup>°</sup> y5y6y7 <sup>°</sup><br>y7y9                          | 1151.50 | 21.398  | 18523  | 2 | 576.25  | -0.64  |
| P00488 F13A_HUMAN Coagulation factor XIII A chain       | 14 |                       | EAVLIQAGEYMGQLLEQASLHFF<br>VTAR                 | 585 | 27 | 10 | 49.02 | b3b4 <sup>°</sup> b4b5 <sup>°</sup> b5y13 <sup>°</sup> y13y<br>14 <sup>°</sup> y14y27        | 3021.56 | 136.696 | 18120  | 3 | 1007.86 | 3.15   |
| P00488 F13A_HUMAN Coagulation factor XIII A chain       | 15 | Carbamidomethyl+C(8)  | DSVWNYHCWNEAWMTRDLPV<br>GFGGWQAVDSTPQENS DGM YR | 367 | 42 | 5  | 14.05 | b23y4y10 <sup>°</sup> y10y13                                                                 | 4959.19 | 97.621  | 15386  | 4 | 1240.55 | 9.06   |
| P00488 F13A_HUMAN Coagulation factor XIII A chain       | 16 | Carbamidomethyl+C(14) | EIRPNSTVQWEEVCRPWVSGHR                          | 682 | 22 | 3  | 22.31 | b4y4y5                                                                                       | 2722.35 | 61.462  | 9377   | 3 | 908.12  | 6.91   |
| P00488 F13A_HUMAN Coagulation factor XIII A chain       | 17 |                       | SNVDMDFEVENAVLGK                                | 516 | 16 | 6  | 31.05 | b1b4b14y12y13y16                                                                             | 1766.81 | 69.720  | 9175   | 2 | 883.91  | -7.88  |

|                                                       |    |                      |                             |     |    |    |       |                                 |         |         |       |   |         |        |
|-------------------------------------------------------|----|----------------------|-----------------------------|-----|----|----|-------|---------------------------------|---------|---------|-------|---|---------|--------|
| [P00488]F13A_HUMAN Coagulation factor XIII A chain    | 18 |                      | QIGGDGMMDDITDTYK            | 468 | 15 | 3  | 26.4  | y4y6y13                         | 1644.74 | 64.896  | 27188 | 2 | 822.88  | 12.02  |
| [P00488]F13A_HUMAN Coagulation factor XIII A chain    | 19 |                      | VGSAMVNAK                   | 261 | 9  | 3  | 38.49 | y4y7y8                          | 876.46  | 25.910  | 19715 | 2 | 438.73  | -2.58  |
| [P00488]F13A_HUMAN Coagulation factor XIII A chain    | 20 | Carbamidomethyl+C(4) | YGQCWVFAGVNTFLR             | 311 | 16 | 3  | 25.03 | b8b11b13                        | 1964.93 | 79.770  | 11264 | 3 | 655.65  | -9.13  |
| [P00488]F13A_HUMAN Coagulation factor XIII A chain    | 21 |                      | EEYVLNDIGVIFYGEVNDIK        | 202 | 20 | 3  | 22.64 | b10b11y6                        | 2329.11 | 95.452  | 5663  | 3 | 777.04  | -21.59 |
| [P00488]F13A_HUMAN Coagulation factor XIII A chain    | 22 |                      | GTQVVGSDMTVTVQFTNPLK        | 638 | 20 | 4  | 14.51 | b4b16*b16y13                    | 2122.06 | 66.084  | 2592  | 3 | 708.03  | -9.55  |
| [P00488]F13A_HUMAN Coagulation factor XIII A chain    | 23 |                      | RGQSFYVQIDFSRPYDPR          | 78  | 18 | 5  | 31.31 | b3b11y4y7y9                     | 2231.10 | 94.231  | 38734 | 2 | 1116.05 | 0.98   |
| [P00488]F13A_HUMAN Coagulation factor XIII A chain    | 24 |                      | LIAMSSDSL RHVY GELDVQIQR    | 705 | 23 | 3  | 13.16 | b10b15y11                       | 2617.33 | 103.908 | 27093 | 3 | 873.12  | -2.71  |
| [P00488]F13A_HUMAN Coagulation factor XIII A chain    | 25 |                      | VEYVIGRYPQENK               | 101 | 13 | 7  | 32.59 | b12°b12*b12y3y4y8*y8            | 1594.84 | 85.953  | 25313 | 3 | 532.28  | 10.79  |
| [P00488]F13A_HUMAN Coagulation factor XIII A chain    | 26 |                      | QIGGDGMMDDITDTYK FQEGQEEE R | 468 | 24 | 3  | 12.82 | b4y3y11                         | 2777.21 | 68.540  | 13890 | 3 | 926.41  | 3.43   |
| [P00488]F13A_HUMAN Coagulation factor XIII A chain    | 27 |                      | GNPIKVSR                    | 253 | 8  | 4  | 54.41 | y3y4y5y6                        | 870.51  | 24.931  | 9963  | 2 | 435.76  | -5.47  |
| [P00488]F13A_HUMAN Coagulation factor XIII A chain    | 28 |                      | LSITFRNNSHNR                | 535 | 12 | 6  | 29.68 | y3*y3y7°y7*y7y8                 | 1458.75 | 88.856  | 5934  | 2 | 729.88  | -1.92  |
| [P00488]F13A_HUMAN Coagulation factor XIII A chain    | 29 | Phosphoryl STY(11)   | GQSFYVQIDFSRPYDPR           | 79  | 17 | 3  | 23.88 | y3y5y7                          | 2154.97 | 26.763  | 1935  | 3 | 719.00  | 9.18   |
| [P00488]F13A_HUMAN Coagulation factor XIII A chain    | 30 | Oxidation+M(5)       | SNVDMDFEVENAVLGK            | 516 | 16 | 3  | 17.33 | b14y4y12                        | 1782.83 | 55.440  | 15253 | 2 | 891.92  | 4.45   |
| [P00488]F13A_HUMAN Coagulation factor XIII A chain    | 31 |                      | EAVLIQAGEYMGQLLEQASLHFF VTA | 585 | 26 | 1  | 8.61  | y16                             | 2865.41 | 136.748 | 7526  | 2 | 1433.21 | -13.12 |
| [P00488]F13A_HUMAN Coagulation factor XIII A chain    | 32 |                      | SIQSSPK                     | 145 | 7  | 1  | 9.72  | b3                              | 746.40  | 31.667  | 1593  | 1 | 746.40  | -5.23  |
| [P11142]HSP7C_HUMAN Heat shock cognate 71 kDa protein | 1  |                      | IINEPTAAAIAYGLDKK           | 171 | 17 | 9  | 51.54 | b2b14y2y5y10y13y14y15y17        | 1787.98 | 65.191  | 98382 | 3 | 596.66  | -7.03  |
| [P11142]HSP7C_HUMAN Heat shock cognate 71 kDa protein | 2  |                      | DAGTIAGLNVLR                | 159 | 12 | 5  | 26.46 | b6°b6b7y7y12                    | 1199.67 | 69.809  | 87630 | 2 | 600.34  | -2.65  |
| [P11142]HSP7C_HUMAN Heat shock cognate 71 kDa protein | 3  |                      | VEIANDQGNR                  | 25  | 11 | 9  | 87.73 | b2b3y3y4y6y7y8y9y11             | 1228.63 | 36.746  | 64016 | 2 | 614.82  | 0.40   |
| [P11142]HSP7C_HUMAN Heat shock cognate 71 kDa protein | 4  |                      | TTPSYVAFTDTER               | 36  | 13 | 12 | 77.06 | b1b5°b5b11b13°b13y3y4y6y9y11y13 | 1487.71 | 55.524  | 50692 | 2 | 744.36  | 4.76   |
| [P11142]HSP7C_HUMAN Heat shock cognate 71 kDa protein | 5  |                      | FEELNADLFR                  | 301 | 10 | 4  | 41.9  | y4y6*y6y8                       | 1253.62 | 74.625  | 32059 | 2 | 627.31  | 3.31   |
| [P11142]HSP7C_HUMAN Heat shock cognate 71 kDa protein | 6  |                      | TVTNAVVTVPAYFNDSQR          | 137 | 18 | 4  | 32.81 | y3y4y9y11                       | 1982.01 | 69.294  | 25338 | 2 | 991.51  | 6.53   |
| [P11142]HSP7C_HUMAN Heat shock cognate 71 kDa protein | 7  |                      | NSLESYAFNMK                 | 539 | 11 | 6  | 22    | b1b3*y2y7y8y11                  | 1303.61 | 65.040  | 24694 | 2 | 652.31  | 10.11  |
| [P11142]HSP7C_HUMAN Heat shock cognate 71 kDa protein | 8  |                      | STAGDTHLGGEDFDNR            | 220 | 16 | 6  | 25.7  | b2°b2y8y9y14y16                 | 1691.72 | 38.953  | 22571 | 3 | 564.58  | -3.17  |
| [P11142]HSP7C_HUMAN Heat shock cognate 71 kDa protein | 9  |                      | NQVAMNPTNTVFDK              | 56  | 15 | 6  | 45.89 | b7b11y11y12y13y15               | 1649.81 | 57.830  | 19090 | 2 | 825.41  | 6.07   |
| [P11142]HSP7C_HUMAN Heat shock cognate 71 kDa protein | 10 |                      | SFYPEEVSSMVLTK              | 112 | 14 | 4  | 27.25 | y3y10y11y14                     | 1616.79 | 62.177  | 9964  | 3 | 539.60  | 1.43   |
| [P11142]HSP7C_HUMAN Heat shock cognate 71 kDa protein | 11 |                      | SINPDEAVAYGAAVQAAILSGDK     | 361 | 23 | 6  | 37.13 | b1b7b8b9b15y2                   | 2260.15 | 69.637  | 4362  | 4 | 565.79  | 3.46   |
| [P11142]HSP7C_HUMAN Heat shock cognate 71 kDa protein | 12 |                      | NQVAMNPTNTVFDK              | 56  | 16 | 8  | 17.33 | b4b15b16y2y5°y5y16*y16          | 1805.89 | 69.588  | 4011  | 2 | 903.45  | -2.50  |
| [P11142]HSP7C_HUMAN Heat shock cognate 71 kDa protein | 13 |                      | LLQDFFNKG                   | 348 | 9  | 4  | 30.71 | b5b6*b6y3                       | 1081.57 | 71.456  | 51285 | 2 | 541.29  | -0.79  |
| [P11142]HSP7C_HUMAN Heat shock cognate 71 kDa protein | 14 |                      | GTLDPVEK                    | 311 | 8  | 4  | 54.41 | b3b5y4y6                        | 858.45  | 33.525  | 17609 | 2 | 429.73  | -11.66 |

|                                                      |    |                       |                                  |     |    |    |        |                                         |         |         |        |   |         |        |
|------------------------------------------------------|----|-----------------------|----------------------------------|-----|----|----|--------|-----------------------------------------|---------|---------|--------|---|---------|--------|
| P11142 HSP7C_HUMAN Heat shock cognate 71 kDa protein | 15 |                       | QTQFTTYSNQPGLVLIQVYEGER          | 423 | 24 | 3  | 12.82  | b3b12y12                                | 2774.36 | 77.626  | 4538   | 2 | 1387.68 | 12.32  |
| P11142 HSP7C_HUMAN Heat shock cognate 71 kDa protein | 16 |                       | MVNHFIAEFK                       | 236 | 10 | 4  | 28.89  | b4b5y4°y4                               | 1235.63 | 90.125  | 2685   | 1 | 1235.63 | 5.43   |
| P11142 HSP7C_HUMAN Heat shock cognate 71 kDa protein | 17 |                       | HWPFMVVNDAGRPK                   | 88  | 14 | 4  | 24.91  | b3y7y8°y8                               | 1653.81 | 61.253  | 2009   | 2 | 827.41  | -10.85 |
| P11142 HSP7C_HUMAN Heat shock cognate 71 kDa protein | 18 | Carbamidomethyl+C(14) | GPAVGIDLGTYSVGVFQHGK             | 3   | 22 | 4  | 24.43  | b5y4y7y8                                | 2263.08 | 110.402 | 1858   | 3 | 755.03  | -17.69 |
| P11142 HSP7C_HUMAN Heat shock cognate 71 kDa protein | 19 |                       | MVQAEAK                          | 517 | 7  | 3  | 37.7   | b5y5y6                                  | 834.39  | 109.552 | 1604   | 1 | 834.39  | -18.21 |
| P11142 HSP7C_HUMAN Heat shock cognate 71 kDa protein | 20 |                       | KDISENK                          | 250 | 7  | 4  | 37.7   | b5b6y6°y6                               | 833.45  | 41.952  | 11792  | 1 | 833.45  | 13.47  |
| P11142 HSP7C_HUMAN Heat shock cognate 71 kDa protein | 21 |                       | NQVAMNPTNTVFDAGR                 | 56  | 16 | 3  | 17.33  | b8b11y5                                 | 1805.89 | 72.060  | 9229   | 3 | 602.64  | -0.74  |
| P11142 HSP7C_HUMAN Heat shock cognate 71 kDa protein | 22 |                       | QTQFTTYSNQPGLVLIQVYEGER<br>AMTK  | 423 | 28 | 5  | 35.99  | b5b6y3y4y7                              | 3205.56 | 111.364 | 2180   | 3 | 1069.19 | 4.34   |
| P11142 HSP7C_HUMAN Heat shock cognate 71 kDa protein | 23 |                       | NQTAEKEEFEHQK                    | 583 | 14 | 6  | 45.78  | b3b4b5b7y6*y6                           | 1745.82 | 126.873 | 1504   | 2 | 873.41  | 6.15   |
| P11142 HSP7C_HUMAN Heat shock cognate 71 kDa protein | 24 | Phosphoryl STY(6)     | EIAEAYLGK                        | 128 | 9  | 5  | 45.26  | b3b4°b4y4_H3PO4<br>y4y8                 | 1073.48 | 98.371  | 4118   | 1 | 1073.48 | -0.57  |
| P11142 HSP7C_HUMAN Heat shock cognate 71 kDa protein | 25 | Oxidation+M(5)        | NQVAMNPTNTVFDAGR                 | 56  | 15 | 3  | 18.32  | b4b6y3                                  | 1665.78 | 49.171  | 2692   | 2 | 833.39  | -5.86  |
| P11142 HSP7C_HUMAN Heat shock cognate 71 kDa protein | 26 | Oxidation+M(10)       | NSLESYAFNMK                      | 539 | 11 | 6  | 37.02  | b4*b4b5*b5b7y7                          | 1319.58 | 24.264  | 1974   | 3 | 440.53  | -8.88  |
| P11142 HSP7C_HUMAN Heat shock cognate 71 kDa protein | 27 | Oxidation+M(5)        | NQVAMNPTNTVFDAGR                 | 56  | 16 | 4  | 35.33  | b3b4b6b12                               | 1821.91 | 114.253 | 1655   | 3 | 607.98  | 11.59  |
| P02671 FIBA_HUMAN Fibrinogen alpha chain             | 1  |                       | GLIDEVNDQFTNR                    | 71  | 13 | 12 | 97.57  | b5b13y2y3*y3y4*y4y5y<br>7y8y9y10        | 1520.74 | 69.898  | 151416 | 2 | 760.88  | 6.66   |
| P02671 FIBA_HUMAN Fibrinogen alpha chain             | 2  |                       | QLEQVIK                          | 202 | 8  | 11 | 36.33  | b1b3°b3*b3b8y1y2y3y6<br>°y6y8           | 928.54  | 38.932  | 107274 | 2 | 464.78  | -1.71  |
| P02671 FIBA_HUMAN Fibrinogen alpha chain             | 3  |                       | MELERPGGNEIR                     | 258 | 13 | 14 | 102.12 | b4b5b9b10y1y2y3y8°y8<br>*y8y10y11y12y13 | 1501.73 | 42.247  | 106018 | 3 | 501.25  | -8.86  |
| P02671 FIBA_HUMAN Fibrinogen alpha chain             | 4  |                       | ALTDMPQMR                        | 249 | 9  | 9  | 76.64  | b6b7y1y4*y4y5y6y7y9                     | 1062.50 | 51.366  | 99913  | 2 | 531.76  | -3.56  |
| P02671 FIBA_HUMAN Fibrinogen alpha chain             | 5  |                       | NSLFEYQK                         | 89  | 8  | 10 | 41.1   | b2°b2y1y4°y4*y4y5y6y<br>8*y8            | 1028.50 | 50.879  | 89205  | 2 | 514.75  | -6.53  |
| P02671 FIBA_HUMAN Fibrinogen alpha chain             | 6  |                       | ESSSHHPGIAEFPSR                  | 558 | 15 | 12 | 78.15  | b5b6°b6b11b15y2y3y4y<br>5y8y9y15        | 1637.75 | 39.286  | 58086  | 3 | 546.59  | -7.60  |
| P02671 FIBA_HUMAN Fibrinogen alpha chain             | 7  |                       | TFPGFFSPLGFEVSETESR              | 527 | 20 | 11 | 84.68  | b2b5y4y6y7y8y9y13y14<br>y18y20          | 2265.08 | 109.747 | 46119  | 2 | 1133.04 | 9.81   |
| P02671 FIBA_HUMAN Fibrinogen alpha chain             | 8  |                       | MDGSLNFNR                        | 678 | 9  | 4  | 30.71  | b8y5y6y9                                | 1053.48 | 36.816  | 43000  | 2 | 527.25  | 5.68   |
| P02671 FIBA_HUMAN Fibrinogen alpha chain             | 9  |                       | TVIGPDGHKEVTK                    | 467 | 13 | 10 | 87.27  | b2°b2b4y2y3y4y7y8y10<br>y11             | 1380.73 | 24.935  | 34787  | 3 | 460.92  | -10.52 |
| P02671 FIBA_HUMAN Fibrinogen alpha chain             | 10 |                       | GGSTSYGTGSETESPR                 | 271 | 16 | 7  | 45.4   | b6b13y6y8y10y11y16                      | 1572.68 | 26.238  | 21503  | 2 | 786.84  | 0.93   |
| P02671 FIBA_HUMAN Fibrinogen alpha chain             | 11 | Carbamidomethyl+C(11) | EVVTSSEDCPEAMDGLTSLGIG<br>TLDGFR | 480 | 30 | 3  | 11.44  | b7y15y18                                | 3128.39 | 94.485  | 17178  | 4 | 782.85  | -4.53  |
| P02671 FIBA_HUMAN Fibrinogen alpha chain             | 12 | Carbamidomethyl+C(6)  | IFSVCQDQETSLGGWLLIQQR            | 657 | 21 | 3  | 14.01  | b8b11y16                                | 2513.23 | 71.358  | 50563  | 3 | 838.42  | -6.31  |
| P02671 FIBA_HUMAN Fibrinogen alpha chain             | 13 |                       | IEVLK                            | 137 | 5  | 2  | 26.61  | b3b4                                    | 601.40  | 61.526  | 33863  | 1 | 601.40  | 6.09   |
| P02671 FIBA_HUMAN Fibrinogen alpha chain             | 14 |                       | MADEAGSEADHEGTHSTK               | 602 | 18 | 10 | 107.11 | y3y6°y6y7y8y13y14y15<br>y16y17          | 1872.74 | 17.299  | 24066  | 4 | 468.94  | -16.43 |
| P02671 FIBA_HUMAN Fibrinogen alpha chain             | 15 |                       | GSVLR                            | 720 | 5  | 2  | 26.61  | b3b4                                    | 531.33  | 22.934  | 16406  | 1 | 531.33  | 2.18   |
| P02671 FIBA_HUMAN Fibrinogen alpha chain             | 16 |                       | QFTSSTSYNR                       | 581 | 10 | 4  | 34.11  | b3b4*b4b8                               | 1190.52 | 27.798  | 4541   | 3 | 397.51  | -17.53 |

|                                           |    |                                                                                                                               |                                                  |     |    |    |       |                                                    |         |         |        |   |         |        |
|-------------------------------------------|----|-------------------------------------------------------------------------------------------------------------------------------|--------------------------------------------------|-----|----|----|-------|----------------------------------------------------|---------|---------|--------|---|---------|--------|
| [P02671 FIBA_HUMAN Fibrinogen alpha chain | 17 |                                                                                                                               | GDSTFESK                                         | 591 | 8  | 5  | 41.1  | y3°y3y4°y4y5                                       | 870.40  | 59.912  | 4163   | 1 | 870.40  | 19.35  |
| [P02671 FIBA_HUMAN Fibrinogen alpha chain | 18 |                                                                                                                               | SSSYSK                                           | 575 | 6  | 1  | 13.7  | b4                                                 | 658.31  | 96.582  | 1591   | 1 | 658.31  | 4.45   |
| [P02671 FIBA_HUMAN Fibrinogen alpha chain | 19 | Carbamidomethyl+C(2)                                                                                                          | DCDDVLQTHPSGTQSGIFNIK                            | 630 | 21 | 4  | 23.66 | y4*y4y5y11                                         | 2332.12 | 112.783 | 1563   | 3 | 778.04  | 12.67  |
| [P02671 FIBA_HUMAN Fibrinogen alpha chain | 20 |                                                                                                                               | QFTSSTSYNRGDSTFESK                               | 581 | 18 | 3  | 15.73 | b9y3y6                                             | 2041.94 | 54.706  | 139328 | 3 | 681.32  | 14.83  |
| [P02671 FIBA_HUMAN Fibrinogen alpha chain | 21 |                                                                                                                               | VTSGSTTTTRR                                      | 448 | 11 | 4  | 37.02 | b7b8b10y9                                          | 1166.60 | 55.421  | 130752 | 2 | 583.80  | -8.89  |
| [P02671 FIBA_HUMAN Fibrinogen alpha chain | 22 |                                                                                                                               | EVDLKDYEDQQK                                     | 190 | 12 | 7  | 56.58 | b3b4b6y7y8y10*y10                                  | 1509.71 | 41.169  | 58352  | 2 | 755.36  | 4.61   |
| [P02671 FIBA_HUMAN Fibrinogen alpha chain | 23 | Carbamidomethyl+C(6)                                                                                                          | IFSVYCDQETSLGGWLLIQRMD<br>GSLNFN                 | 657 | 30 | 6  | 24.49 | y4*y4y7°y7y12y14                                   | 3547.66 | 90.975  | 24149  | 4 | 887.67  | -14.52 |
| [P02671 FIBA_HUMAN Fibrinogen alpha chain | 24 |                                                                                                                               | MKGLIDEVNDQFTNR                                  | 69  | 15 | 3  | 18.32 | b8b11y14                                           | 1779.89 | 76.360  | 14564  | 3 | 593.97  | 13.51  |
| [P02671 FIBA_HUMAN Fibrinogen alpha chain | 25 |                                                                                                                               | LKNSLFEYQK                                       | 87  | 10 | 3  | 37.12 | y4y5y6                                             | 1269.68 | 68.414  | 13776  | 2 | 635.34  | -6.06  |
| [P02671 FIBA_HUMAN Fibrinogen alpha chain | 26 |                                                                                                                               | ALTDMPQMRMELERPGGNEITR                           | 249 | 22 | 4  | 20.08 | b5b7b12*b12                                        | 2545.21 | 103.993 | 12694  | 3 | 849.07  | -9.21  |
| [P02671 FIBA_HUMAN Fibrinogen alpha chain | 27 |                                                                                                                               | MELERPGGNEITRGGSTSYGTGSE<br>TESPR                | 258 | 29 | 4  | 17.56 | y6°y6y10y13                                        | 3055.36 | 64.310  | 7608   | 4 | 764.60  | -12.78 |
| [P02671 FIBA_HUMAN Fibrinogen alpha chain | 28 |                                                                                                                               | SSSYSKQFTSSTSYNR                                 | 575 | 16 | 5  | 31.05 | b10b11y4°y4y10                                     | 1829.81 | 46.059  | 2119   | 2 | 915.41  | -10.74 |
| [P02671 FIBA_HUMAN Fibrinogen alpha chain | 29 |                                                                                                                               | DSHSLTTNIMEILRGDFSSANNR                          | 100 | 23 | 3  | 13.16 | b6y10y12                                           | 2578.26 | 76.433  | 1746   | 3 | 860.09  | 9.94   |
| [P02671 FIBA_HUMAN Fibrinogen alpha chain | 30 | Oxidation+M(9)                                                                                                                | TFPGFFPMLGEFVSETESR                              | 527 | 20 | 10 | 72.55 | b3b4b5b8°b8b9b11y5y8<br>y10                        | 2281.06 | 136.360 | 3194   | 2 | 1141.03 | 5.89   |
| [P02671 FIBA_HUMAN Fibrinogen alpha chain | 31 | Carbamidomethyl+C(11);<br>Oxidation+M(15)                                                                                     | EVVTSSEGDSCPEAMDGLTSLGIG<br>TLDGFR               | 480 | 30 | 3  | 36.21 | y8y9y10                                            | 3144.37 | 122.605 | 1812   | 4 | 786.85  | -9.94  |
| [P02671 FIBA_HUMAN Fibrinogen alpha chain | 32 | Oxidation+M(1)                                                                                                                | MELERPGGNEITR                                    | 258 | 13 | 3  | 20.83 | b8b10y4                                            | 1517.72 | 36.554  | 1673   | 3 | 506.58  | -9.09  |
| [P02671 FIBA_HUMAN Fibrinogen alpha chain | 33 |                                                                                                                               | IGPDGHKEVTK                                      | 469 | 11 | 1  | 7.45  | b9                                                 | 1180.63 | 24.928  | 18915  | 2 | 590.82  | -4.45  |
| [P02671 FIBA_HUMAN Fibrinogen alpha chain | 34 |                                                                                                                               | GPDGHKEVTK                                       | 470 | 10 | 2  | 21.33 | b5b6                                               | 1067.54 | 24.938  | 9938   | 2 | 534.28  | -4.69  |
| [P02671 FIBA_HUMAN Fibrinogen alpha chain | 35 |                                                                                                                               | EFVSETESR                                        | 538 | 9  | 0  | 5.95  |                                                    | 1083.50 | 109.798 | 8207   | 1 | 1083.50 | 7.32   |
| [P02671 FIBA_HUMAN Fibrinogen alpha chain | 36 |                                                                                                                               | TDMPQMR                                          | 251 | 7  | 0  | 1.59  |                                                    | 878.40  | 51.437  | 4547   | 1 | 878.40  | 12.09  |
| [P02671 FIBA_HUMAN Fibrinogen alpha chain | 37 |                                                                                                                               | NSLFEYQK                                         | 89  | 8  | 0  | 1.19  |                                                    | 1011.49 | 50.860  | 2565   | 2 | 506.25  | 14.66  |
| [Q15942 Zyx_HUMAN Zyxin                   | 1  | Carbamidomethyl+C(10);<br>Carbamidomethyl+C(13);<br>Carbamidomethyl+C(16);<br>Carbamidomethyl+C(34);<br>Carbamidomethyl+C(37) | ALGQLFHIACFTCHQCAQQLQGG<br>QFYSLEGAPYCEGCYTDTLEK | 399 | 44 | 7  | 26.39 | b20b21b25b31y11y13y1<br>5                          | 5228.34 | 87.666  | 83686  | 4 | 1307.84 | 4.95   |
| [Q15942 Zyx_HUMAN Zyxin                   | 2  |                                                                                                                               | LGHPEALSAGTGSPPSFTYAQQ<br>R                      | 295 | 25 | 11 | 42.44 | b3b11b13b15y5y11°y11<br>*y11y12*y12y25             | 2597.29 | 57.178  | 60044  | 3 | 866.43  | 5.36   |
| [Q15942 Zyx_HUMAN Zyxin                   | 3  | Carbamidomethyl+C(9)                                                                                                          | QNVAVNELCGR                                      | 375 | 11 | 9  | 74.42 | b3y4y6*y6y7y8*y8y10y<br>11                         | 1259.62 | 42.752  | 59211  | 2 | 630.31  | 3.00   |
| [Q15942 Zyx_HUMAN Zyxin                   | 4  |                                                                                                                               | EVEELEQLTQQLMQDMEHPQR                            | 354 | 21 | 16 | 67.76 | b2°b2b5°b5b8°b8b13b1<br>4y3y5°y5*y5y7y10y17y<br>21 | 2611.22 | 105.112 | 46066  | 3 | 871.08  | 1.50   |
| [Q15942 Zyx_HUMAN Zyxin                   | 5  |                                                                                                                               | SPGAPGLTLK                                       | 343 | 11 | 6  | 27.52 | b3b4°b4y2y7y11                                     | 1037.59 | 50.420  | 44934  | 2 | 519.30  | -7.18  |

|                                                       |    |                                                      |                                                |     |    |    |        |                                                              |         |         |        |   |         |        |
|-------------------------------------------------------|----|------------------------------------------------------|------------------------------------------------|-----|----|----|--------|--------------------------------------------------------------|---------|---------|--------|---|---------|--------|
| Q15942 ZyX_HUMAN Zyxin                                | 6  |                                                      | VNPFRRPGDSEPPAPGAQR                            | 35  | 19 | 4  | 36.52  | b10y7y8y9                                                    | 1988.98 | 45.828  | 41899  | 3 | 663.67  | -4.79  |
| Q15942 ZyX_HUMAN Zyxin                                | 7  | Carbamidomethyl+C(1);<br>Carbamidomethyl+C(4)        | CNTCGEPITDR                                    | 443 | 11 | 5  | 31.5   | b2y5y8y9y11                                                  | 1322.55 | 28.711  | 24659  | 2 | 661.78  | 1.29   |
| Q15942 ZyX_HUMAN Zyxin                                | 8  |                                                      | FGPVVAPKPK                                     | 25  | 10 | 5  | 52.19  | y4y6y7y8y10                                                  | 1039.63 | 39.857  | 22260  | 2 | 520.32  | -1.17  |
| Q15942 ZyX_HUMAN Zyxin                                | 9  |                                                      | GPPASSAPAPK                                    | 253 | 12 | 8  | 69.38  | b4y1y2y4y6y8y9y10                                            | 1076.57 | 23.962  | 21634  | 2 | 538.79  | -1.70  |
| Q15942 ZyX_HUMAN Zyxin                                | 10 |                                                      | FSPGAPGGSGSQPNQK                               | 279 | 16 | 12 | 75.83  | b5°b5b11b12b13y9*y9y<br>10y11*y11y14y16                      | 1515.72 | 29.555  | 18881  | 2 | 758.36  | -0.08  |
| Q15942 ZyX_HUMAN Zyxin                                | 11 |                                                      | QHPVPPPAQNQNQVR                                | 328 | 15 | 7  | 18.32  | b4*b4y4y7*y7y15*y15                                          | 1709.87 | 25.367  | 11227  | 3 | 570.63  | -6.14  |
| Q15942 ZyX_HUMAN Zyxin                                | 12 |                                                      | VSSGYVPPPVPATPFSSK                             | 167 | 17 | 5  | 34.34  | b5b6b14y4y13                                                 | 1719.92 | 86.158  | 3530   | 2 | 860.46  | 11.78  |
| Q15942 ZyX_HUMAN Zyxin                                | 13 |                                                      | VSSIDLEIDSLSLDDMTK                             | 140 | 20 | 3  | 14.51  | b5b18y9                                                      | 2181.09 | 121.173 | 2764   | 2 | 1091.05 | 3.36   |
| Q15942 ZyX_HUMAN Zyxin                                | 14 |                                                      | VNPFRRPGDSEPPAPGAQRAQMG<br>R                   | 35  | 24 | 9  | 61.74  | b11b14y3y4y5y6y10*y1<br>0y15                                 | 2532.22 | 84.526  | 4130   | 2 | 1266.61 | -14.65 |
| Q15942 ZyX_HUMAN Zyxin                                | 15 | Phosphoryl STY(9)                                    | SPGAPGLTLK                                     | 343 | 11 | 3  | 24.51  | b7b10y3                                                      | 1117.55 | 88.124  | 8536   | 2 | 559.28  | -4.81  |
| Q15942 ZyX_HUMAN Zyxin                                | 16 | Phosphoryl STY(18)                                   | LGHPEALSAGTGPSPQPSFTYAQQ<br>R                  | 295 | 25 | 3  | 12.51  | b6y7y9                                                       | 2677.25 | 64.388  | 6399   | 3 | 893.09  | 6.57   |
| Q15942 ZyX_HUMAN Zyxin                                | 17 | Phosphoryl STY(13)                                   | VSSIDLEIDSLSLDDMTK                             | 140 | 20 | 3  | 14.51  | b7b13_H3PO4<br>b13_HPO3 b13y6                                | 2261.05 | 68.693  | 5415   | 2 | 1131.03 | 2.38   |
| Q15942 ZyX_HUMAN Zyxin                                | 18 | Phosphoryl STY(18)                                   | LGHPEALSAGTGPSPQPSFTYAQQ<br>REKPR              | 295 | 29 | 7  | 25.36  | b11b16*b16b17y11y19°<br>y19                                  | 3187.50 | 105.196 | 4046   | 4 | 797.63  | -6.43  |
| Q15942 ZyX_HUMAN Zyxin                                | 19 | Phosphoryl STY(15)                                   | VSSGYVPPPVPATPFSSK                             | 167 | 17 | 4  | 37.19  | b14b15_H3PO4<br>b15b16_HPO3<br>b16y16_H3PO4 y16              | 1799.86 | 136.751 | 3562   | 1 | 1799.86 | 4.34   |
| Q15942 ZyX_HUMAN Zyxin                                | 20 | Phosphoryl STY(11)                                   | MAAPRPSPAISVVSAPAFYAPQK                        | 0   | 24 | 8  | 41.71  | b6b11°b11b12b13°b13y<br>4y12                                 | 2523.23 | 123.515 | 1794   | 3 | 841.75  | -3.77  |
| Q15942 ZyX_HUMAN Zyxin                                | 21 |                                                      | LGHPEALSAGTGPSPQPSFTYAQ                        | 295 | 23 | 6  | 28.05  | y3*y3y4y8*y8y13                                              | 2313.12 | 57.199  | 7716   | 3 | 771.71  | 2.96   |
| Q3ZCM7 TBB8_HUMAN Tubulin beta-8<br>chain             | 1  |                                                      | LAVNMVPPFR                                     | 252 | 10 | 15 | 101.43 | b2b5*b5y1y2y3y4y5y6y<br>7*y7y8y9*y9y10                       | 1143.63 | 72.994  | 161983 | 2 | 572.32  | -2.24  |
| Q3ZCM7 TBB8_HUMAN Tubulin beta-8<br>chain             | 2  |                                                      | FWEVISDEHAIDSAGTYHGDSLQ<br>LER                 | 19  | 27 | 6  | 18.07  | y2y10y12*y12y14*y14                                          | 3112.40 | 94.512  | 71718  | 4 | 778.85  | -13.88 |
| Q3ZCM7 TBB8_HUMAN Tubulin beta-8<br>chain             | 3  |                                                      | MSATFIGNNTAIQELFK                              | 362 | 17 | 8  | 39.4   | b6b7°b7b8b14°b14y2y1<br>7                                    | 1884.97 | 95.000  | 23784  | 3 | 629.00  | 10.75  |
| Q3ZCM7 TBB8_HUMAN Tubulin beta-8<br>chain             | 4  |                                                      | GHYTEGAELMESVMDVVR                             | 103 | 18 | 5  | 23.14  | b12b13°b13y2y9                                               | 2022.91 | 59.938  | 2001   | 2 | 1011.96 | -9.72  |
| Q3ZCM7 TBB8_HUMAN Tubulin beta-8<br>chain             | 5  |                                                      | NSSYFADWLPNNVK                                 | 336 | 14 | 6  | 42.77  | b7y4y6y8*y8y9                                                | 1654.77 | 63.016  | 3212   | 4 | 414.45  | -11.43 |
| Q3ZCM7 TBB8_HUMAN Tubulin beta-8<br>chain             | 6  | Carbamidomethyl+C(27);<br>Carbamidomethyl+C(37)<br>) | VSDTVVEPYNATLSVHQLIENADE<br>TFCIDNEALYDICKSTLK | 174 | 42 | 4  | 25.35  | b6b8b9b12                                                    | 4815.27 | 120.241 | 25964  | 4 | 1204.57 | -7.40  |
| Q3ZCM7 TBB8_HUMAN Tubulin beta-8<br>chain             | 7  | Phosphoryl STY(2)                                    | VSEQFTAMFRR                                    | 380 | 11 | 3  | 27.52  | b10y8y9                                                      | 1451.65 | 38.467  | 6156   | 2 | 726.33  | 5.80   |
| Q3ZCM7 TBB8_HUMAN Tubulin beta-8<br>chain             | 8  | Oxidation+M(8)                                       | VSEQFTAMFRR                                    | 380 | 11 | 4  | 37.02  | b4b8b9y5                                                     | 1387.67 | 22.647  | 9373   | 3 | 463.23  | -3.34  |
| Q3ZCM7 TBB8_HUMAN Tubulin beta-8<br>chain             | 9  | Carbamidomethyl+C(12);<br>Oxidation+M(1)             | MREIVLTQIQCGNQIGAK                             | 0   | 19 | 4  | 20.93  | b4b13y10y13                                                  | 2132.10 | 76.786  | 3051   | 3 | 711.37  | 1.83   |
| Q8NGU1 OR9A1_HUMAN Putative<br>olfactory receptor 9A1 | 1  | Carbamidomethyl+C(22)                                | LGNYSSATEFFLLGFPGSQEVCR                        | 1   | 23 | 20 | 104.57 | b2b6°b6b7b9°b9b11b13<br>b21y2y3y4°y4y6°y6y11<br>y17y19y22y23 | 2579.24 | 121.871 | 181266 | 3 | 860.42  | 7.29   |
| Q8NGU1 OR9A1_HUMAN Putative<br>olfactory receptor 9A1 | 2  | Carbamidomethyl+C(23)                                | MLGNYSSATEFFLLGFPGSQEVCR                       | 0   | 24 | 6  | 33.18  | b2b3b8b16y4y5                                                | 2710.27 | 91.595  | 3451   | 5 | 542.86  | 3.06   |



|                                                    |    |                                                                  |                                          |     |    |    |        |                                                          |         |         |        |   |         |        |
|----------------------------------------------------|----|------------------------------------------------------------------|------------------------------------------|-----|----|----|--------|----------------------------------------------------------|---------|---------|--------|---|---------|--------|
| Q8NGU1 OR9A1_HUMAN Putative olfactory receptor 9A1 | 3  | Carbamidomethyl+C(23);Oxidation+M(1)                             | MLGNYSSATEFFLLGFPGSQEVCR                 | 0   | 24 | 3  | 12.82  | b13y8y11                                                 | 2726.30 | 84.490  | 68220  | 3 | 909.44  | 14.42  |
| P14649 MYL6B_HUMAN Myosin light chain 6B           | 1  |                                                                  | ALGQNPTNAEVLK                            | 94  | 13 | 13 | 83.59  | b2b3b4b5*b5b10*b10y2y7y8y9y11y13                         | 1354.73 | 45.380  | 170322 | 2 | 677.87  | 0.00   |
| P14649 MYL6B_HUMAN Myosin light chain 6B           | 2  | Carbamidomethyl+C(6)                                             | ILYSQCGDVMR                              | 83  | 11 | 10 | 82.21  | b2y2y3y5y6y7y8y9y11*y11                                  | 1341.63 | 49.026  | 138359 | 2 | 671.32  | 1.18   |
| P14649 MYL6B_HUMAN Myosin light chain 6B           | 3  |                                                                  | VDFETFLPMLQAVAK                          | 121 | 15 | 3  | 18.32  | b3b14y5                                                  | 1708.88 | 37.299  | 15483  | 4 | 427.98  | -10.14 |
| P14649 MYL6B_HUMAN Myosin light chain 6B           | 4  |                                                                  | VFDK                                     | 151 | 4  | 1  | 12.91  | b3                                                       | 508.27  | 59.881  | 12880  | 1 | 508.27  | -9.61  |
| P14649 MYL6B_HUMAN Myosin light chain 6B           | 5  | Phosphoryl STY(9)                                                | TQEPPVDLSK                               | 46  | 10 | 5  | 43.44  | b6*b6b7b8y5                                              | 1193.54 | 136.456 | 2298   | 1 | 1193.54 | 7.06   |
| P14649 MYL6B_HUMAN Myosin light chain 6B           | 6  | Oxidation+M(9)                                                   | VDFETFLPMLQAVAK                          | 121 | 15 | 4  | 26.4   | b3*b3b10b13                                              | 1724.87 | 97.328  | 43101  | 3 | 575.63  | -11.68 |
| P14649 MYL6B_HUMAN Myosin light chain 6B           | 7  | Carbamidomethyl+C(6)                                             | ILYSQCGDVMR                              | 83  | 11 | 0  | 2.38   |                                                          | 1324.60 | 49.102  | 50056  | 2 | 662.81  | 3.87   |
| P02675 FIBB_HUMAN Fibrinogen beta chain            | 1  | Carbamidomethyl+C(3);Carbamidomethyl+C(7)                        | TPCTVSCNIPVVS GK                         | 224 | 15 | 18 | 135.04 | b2b3b9b10b11*b11b12*b12*b12y1y3y4y6y10y11y12y13y15       | 1618.80 | 51.744  | 188719 | 2 | 809.90  | 2.94   |
| P02675 FIBB_HUMAN Fibrinogen beta chain            | 2  |                                                                  | DNENVVNEYSSLEK                           | 163 | 15 | 6  | 44.26  | b5y7y9y10y11y15                                          | 1768.80 | 60.542  | 141769 | 2 | 884.90  | 7.59   |
| P02675 FIBB_HUMAN Fibrinogen beta chain            | 3  |                                                                  | IRPFFPQQ                                 | 483 | 8  | 5  | 41.1   | b2y3*y3y4y6                                              | 1032.56 | 61.096  | 132724 | 2 | 516.79  | 1.66   |
| P02675 FIBB_HUMAN Fibrinogen beta chain            | 4  | Carbamidomethyl+C(3)                                             | VYCDMNTENGGWTVIQNR                       | 267 | 18 | 7  | 38.71  | b14b15y4y6y12*y12y18                                     | 2156.97 | 62.852  | 102072 | 2 | 1078.99 | 10.53  |
| P02675 FIBB_HUMAN Fibrinogen beta chain            | 5  |                                                                  | EDGGGWYNR                                | 426 | 10 | 4  | 41.9   | y4y6y8y10                                                | 1239.52 | 62.631  | 71670  | 2 | 620.27  | 5.52   |
| P02675 FIBB_HUMAN Fibrinogen beta chain            | 6  |                                                                  | REEAPSLRPAPPISGGGYR                      | 52  | 20 | 7  | 50.07  | b2b4b7b10y5y6y7                                          | 2107.08 | 48.420  | 61285  | 4 | 527.52  | -13.56 |
| P02675 FIBB_HUMAN Fibrinogen beta chain            | 7  |                                                                  | AHYGGFTVQNEANK                           | 353 | 14 | 8  | 57.08  | b2y5y6*y6y7y11y12y14                                     | 1535.71 | 39.303  | 39009  | 3 | 512.58  | -6.68  |
| P02675 FIBB_HUMAN Fibrinogen beta chain            | 8  |                                                                  | QGFQNVATNTD GK                           | 300 | 13 | 14 | 109.69 | b7b11*b11y4y6y7*y7y8*y8y10y11y12*y12y13                  | 1308.62 | 36.603  | 23784  | 2 | 654.81  | 3.26   |
| P02675 FIBB_HUMAN Fibrinogen beta chain            | 9  |                                                                  | NSVDELNNNVEAVSQTSSSSFY MYLLK             | 124 | 28 | 9  | 25.78  | b1b2b3b13y2y3y4y15y28                                    | 3167.51 | 89.727  | 20827  | 2 | 1584.26 | 8.94   |
| P02675 FIBB_HUMAN Fibrinogen beta chain            | 10 |                                                                  | MVSWSFHK                                 | 3   | 8  | 4  | 33.32  | b6y6y7y8                                                 | 1021.49 | 87.329  | 2138   | 1 | 1021.49 | -4.06  |
| P02675 FIBB_HUMAN Fibrinogen beta chain            | 11 |                                                                  | HGTDDGVVWMNWK                            | 458 | 13 | 4  | 20.83  | b3b7y5*y5                                                | 1544.72 | 71.439  | 74529  | 2 | 772.86  | 13.67  |
| P02675 FIBB_HUMAN Fibrinogen beta chain            | 12 | Carbamidomethyl+C(12)                                            | LES DVSAQMEYCR                           | 211 | 13 | 5  | 20.83  | b4b8*b8*b8y3                                             | 1587.71 | 77.276  | 57025  | 2 | 794.36  | 22.60  |
| P02675 FIBB_HUMAN Fibrinogen beta chain            | 13 |                                                                  | EEAPSLRPAPPISGGGYR                       | 53  | 19 | 9  | 71.66  | b9*b9y4y5y6y8*y8y9y10                                    | 1951.01 | 52.100  | 30949  | 2 | 976.01  | 5.51   |
| P02675 FIBB_HUMAN Fibrinogen beta chain            | 14 |                                                                  | YYWGGQYTWDMAK                            | 445 | 13 | 4  | 34.72  | b7b8y5y10                                                | 1668.73 | 44.298  | 16404  | 3 | 556.92  | 10.97  |
| P02675 FIBB_HUMAN Fibrinogen beta chain            | 15 |                                                                  | DLWQK                                    | 152 | 5  | 3  | 13.3   | b4*b4*b4                                                 | 689.35  | 39.917  | 14865  | 1 | 689.35  | -11.33 |
| P02675 FIBB_HUMAN Fibrinogen beta chain            | 16 |                                                                  | GTAGNALMDGASQLMGENR                      | 376 | 19 | 5  | 33.59  | b4b7b9*b9b15                                             | 1892.90 | 63.692  | 2622   | 2 | 946.95  | 20.51  |
| P02675 FIBB_HUMAN Fibrinogen beta chain            | 17 | Carbamidomethyl+C(8);Carbamidomethyl+C(19);Carbamidomethyl+C(23) | KAPDAGGCLHADPDLGVLCP TGC QLQEALLQ QERPIR | 87  | 37 | 19 | 116.11 | b4b10b11b16b17b19y3y4y10y12y15y18*y18y19*y19y20y22y23y25 | 4083.98 | 79.277  | 239863 | 5 | 817.60  | -9.62  |
| P02675 FIBB_HUMAN Fibrinogen beta chain            | 18 |                                                                  | KGGETSEMYLIQPDSSVKPYR                    | 246 | 21 | 10 | 85.96  | b8*b8b9b10b11b12y3y4y7y9                                 | 2385.15 | 57.573  | 217517 | 4 | 597.04  | -9.31  |

|                                                      |    |                                                                           |                                                 |     |    |    |        |                                                      |         |         |        |   |         |        |
|------------------------------------------------------|----|---------------------------------------------------------------------------|-------------------------------------------------|-----|----|----|--------|------------------------------------------------------|---------|---------|--------|---|---------|--------|
| P02675 FIBB_HUMAN Fibrinogen beta chain              | 19 |                                                                           | MGPTELLIEMEDWKGDK                               | 334 | 17 | 11 | 88.72  | b6b7 <sup>b</sup> 7b10y3 <sup>y</sup> 3y4y5y6y11y12  | 1991.93 | 90.816  | 98041  | 3 | 664.65  | -7.48  |
| P02675 FIBB_HUMAN Fibrinogen beta chain              | 20 |                                                                           | AHYGGFTVQNEANKYQISVVK                           | 353 | 21 | 4  | 22.46  | b8 <sup>b</sup> 8b9y4                                | 2368.17 | 54.276  | 79204  | 3 | 790.06  | 1.75   |
| P02675 FIBB_HUMAN Fibrinogen beta chain              | 21 |                                                                           | VKAHYGGFTVQNEANK                                | 351 | 16 | 5  | 39.13  | y4*y4y6y10y13                                        | 1762.90 | 81.567  | 50637  | 2 | 881.95  | 8.03   |
| P02675 FIBB_HUMAN Fibrinogen beta chain              | 22 | Carbamidomethyl+C(3);<br>Carbamidomethyl+C(7);<br>Carbamidomethyl+C(17)   | TPCTVSCNIPVVSQKECEEIIR                          | 224 | 22 | 3  | 20.08  | y3y10y13                                             | 2548.24 | 61.617  | 30156  | 3 | 850.08  | 6.99   |
| P02675 FIBB_HUMAN Fibrinogen beta chain              | 23 |                                                                           | DNENVVNEYSSELEKHQLYIDETV<br>NSNIPTNLR           | 163 | 33 | 3  | 11.09  | b5b24y13                                             | 3876.90 | 84.433  | 10988  | 3 | 1292.97 | 12.03  |
| P02675 FIBB_HUMAN Fibrinogen beta chain              | 24 |                                                                           | WDPYKQGFNGVATNTDGGK                             | 295 | 18 | 4  | 25.06  | b9y3y5y12                                            | 1997.97 | 102.767 | 7917   | 2 | 999.49  | 15.03  |
| P02675 FIBB_HUMAN Fibrinogen beta chain              | 25 | Carbamidomethyl+C(12);<br>Carbamidomethyl+C(16);<br>Carbamidomethyl+C(20) | LESQVSAQMEYCRTPCTVSCNIPV<br>VSGK                | 211 | 28 | 4  | 17.8   | b3 <sup>b</sup> 3b7b12                               | 3187.45 | 92.930  | 4826   | 3 | 1063.16 | -0.15  |
| P02675 FIBB_HUMAN Fibrinogen beta chain              | 26 |                                                                           | YRGTAGNALMDGASQLMGENR                           | 374 | 21 | 5  | 19.14  | b13b15*b15y6y9                                       | 2212.01 | 63.669  | 3914   | 3 | 738.01  | -4.41  |
| P02675 FIBB_HUMAN Fibrinogen beta chain              | 27 | Carbamidomethyl+C(1)                                                      | CHAANPNGRYYWGGQYTDWMA<br>K                      | 436 | 22 | 3  | 22.31  | b10b11y10                                            | 2646.14 | 125.368 | 3559   | 2 | 1323.57 | -0.37  |
| P02675 FIBB_HUMAN Fibrinogen beta chain              | 28 | Phosphoryl STY()                                                          | NSVDELNNNVEAVSQTSSSFQY<br>MYLLK                 | 124 | 28 | 7  | 40.7   | b8b9b10*b10b12b19y9                                  | 3247.47 | 87.844  | 45307  | 3 | 1083.16 | 9.85   |
| P02675 FIBB_HUMAN Fibrinogen beta chain              | 29 | Phosphoryl STY(15)                                                        | REEAPSLRPAPPISGGGYR                             | 52  | 20 | 6  | 19.99  | b6 <sup>b</sup> 6b15y5y12*y12                        | 2187.06 | 59.005  | 4799   | 3 | 729.69  | -1.34  |
| P02675 FIBB_HUMAN Fibrinogen beta chain              | 30 | Oxidation+M(24)                                                           | NSVDELNNNVEAVSQTSSSFQY<br>MYLLK                 | 124 | 28 | 6  | 40.7   | b3b10b11b13b14y12                                    | 3183.50 | 81.595  | 18425  | 4 | 796.63  | 7.75   |
| P02675 FIBB_HUMAN Fibrinogen beta chain              | 31 | Carbamidomethyl+C(3)                                                      | VSCNIPVVSQK                                     | 228 | 11 | 2  | 15.01  | b5b9                                                 | 1159.60 | 51.756  | 19356  | 2 | 580.30  | -14.21 |
| A6NNZ2 TBB8B_HUMAN Tubulin beta-8 chain B            | 1  |                                                                           | LAVNMVPPFR                                      | 252 | 10 | 15 | 101.43 | b2b5*b5y1y2y3y4y5y6y7*y7y8y9*y9y10                   | 1143.63 | 72.994  | 161983 | 2 | 572.32  | -2.24  |
| A6NNZ2 TBB8B_HUMAN Tubulin beta-8 chain B            | 2  |                                                                           | FWEVISDEHAIDSAGTYHGDSLQ<br>LER                  | 19  | 27 | 6  | 18.07  | y2y10y12*y12y14*y14                                  | 3112.40 | 94.512  | 71718  | 4 | 778.85  | -13.88 |
| A6NNZ2 TBB8B_HUMAN Tubulin beta-8 chain B            | 3  | Carbamidomethyl+C(6);<br>Carbamidomethyl+C(8)                             | KEAESCDCLQGFQLTHSLGGGTG<br>SGMGTLLISK           | 121 | 33 | 5  | 13.42  | b3b22y4y7y33                                         | 3439.63 | 78.423  | 15018  | 3 | 1147.22 | 0.35   |
| A6NNZ2 TBB8B_HUMAN Tubulin beta-8 chain B            | 4  | Carbamidomethyl+C(18)                                                     | MSATFIGNNAIQELFTCVSEQFT<br>AMFR                 | 362 | 28 | 9  | 25.78  | b7b17*b17y8*y8*y8y10*y10y11                          | 3184.51 | 81.593  | 6265   | 3 | 1062.17 | 6.21   |
| A6NNZ2 TBB8B_HUMAN Tubulin beta-8 chain B            | 5  | Carbamidomethyl+C(18)                                                     | MSATFIGNNAIQELFTCVSEQFT<br>AMFRR                | 362 | 29 | 8  | 40.2   | b4b8b9*b9b10b12*b12y11                               | 3340.64 | 112.814 | 2215   | 3 | 1114.22 | 13.45  |
| A6NNZ2 TBB8B_HUMAN Tubulin beta-8 chain B            | 6  | Carbamidomethyl+C(23);<br>Oxidation+M()                                   | LPTPTYGDLNHLVSATMSGVTTC<br>LR                   | 216 | 25 | 6  | 39.57  | b10b17*b17y10y11y12                                  | 2720.32 | 69.612  | 2484   | 2 | 1360.66 | -6.10  |
| O95810 SDPR_HUMAN Serum deprivation-response protein | 1  |                                                                           | LVNMLDAVQENQHK                                  | 64  | 14 | 10 | 70.09  | y1y2y5*y5y7y9y11y13*y13y14                           | 1638.82 | 59.871  | 149563 | 3 | 546.94  | -5.66  |
| O95810 SDPR_HUMAN Serum deprivation-response protein | 2  |                                                                           | VLIFQEENEIPASVFK                                | 156 | 17 | 20 | 155.46 | b1b2b3b4b8b9b10b13b14y2y3y5y7y11*y11y12y13*y13y14y17 | 1962.06 | 89.412  | 142806 | 2 | 981.54  | 2.61   |
| O95810 SDPR_HUMAN Serum deprivation-response protein | 3  |                                                                           | VSPLTFGR                                        | 291 | 8  | 4  | 36.33  | b3y4y6y8                                             | 876.48  | 55.632  | 33811  | 2 | 438.75  | -11.70 |
| O95810 SDPR_HUMAN Serum deprivation-response protein | 4  |                                                                           | SDGDPVQPAVLQVHQT                                | 408 | 17 | 5  | 16.48  | b11y1y7y10y17                                        | 1777.88 | 53.536  | 30165  | 2 | 889.44  | 5.56   |
| O95810 SDPR_HUMAN Serum deprivation-response protein | 5  |                                                                           | QPVSGAVEGK                                      | 173 | 10 | 7  | 52.19  | b10y2y5y6y7y8y10                                     | 971.51  | 22.953  | 27058  | 2 | 486.26  | -5.91  |
| O95810 SDPR_HUMAN Serum deprivation-response protein | 6  |                                                                           | QEKPSSPMPSPSTPSPSLNLGNT<br>EAIRDNSQVNAVTVLTLDDK | 19  | 45 | 5  | 11.06  | b10y2y8y31y45                                        | 4749.39 | 96.070  | 25057  | 4 | 1188.10 | 0.31   |

|                                                       |    |                       |                                |     |    |    |       |                                            |         |         |       |   |         |        |
|-------------------------------------------------------|----|-----------------------|--------------------------------|-----|----|----|-------|--------------------------------------------|---------|---------|-------|---|---------|--------|
| [O95810]SDPR_HUMAN Serum deprivation-response protein | 7  |                       | YQASTSNTVSK                    | 102 | 11 | 13 | 87.73 | b2*b2b3y1y2y3y4y6y7y8y9*y9y11              | 1185.57 | 19.764  | 21189 | 2 | 593.29  | -1.13  |
| [O95810]SDPR_HUMAN Serum deprivation-response protein | 8  |                       | YEGSYALTSEEAEER                | 394 | 14 | 7  | 39.39 | b1b8b11y2y7y11y12                          | 1604.73 | 53.707  | 7117  | 2 | 802.87  | 12.86  |
| [O95810]SDPR_HUMAN Serum deprivation-response protein | 9  |                       | FQHPGSDMR                      | 10  | 9  | 5  | 60.33 | b3b4b5y5y8                                 | 1074.50 | 64.981  | 21236 | 2 | 537.75  | 17.15  |
| [O95810]SDPR_HUMAN Serum deprivation-response protein | 10 |                       | IVSVER                         | 261 | 6  | 1  | 13.7  | y4                                         | 702.41  | 38.540  | 13869 | 1 | 702.41  | 0.43   |
| [O95810]SDPR_HUMAN Serum deprivation-response protein | 11 |                       | LLEK                           | 113 | 4  | 1  | 12.91 | b3                                         | 502.33  | 71.746  | 9509  | 1 | 502.33  | 5.35   |
| [O95810]SDPR_HUMAN Serum deprivation-response protein | 12 |                       | GSNSGMDSNIDLTIVEDEEEESVALEQAQK | 362 | 30 | 4  | 14.32 | b14b16y9y11                                | 3237.51 | 77.365  | 6531  | 5 | 648.31  | 16.67  |
| [O95810]SDPR_HUMAN Serum deprivation-response protein | 13 |                       | VDSLK                          | 238 | 5  | 1  | 13.3  | y4                                         | 561.32  | 27.967  | 5733  | 1 | 561.32  | 0.98   |
| [O95810]SDPR_HUMAN Serum deprivation-response protein | 14 |                       | EGESHAENETK                    | 303 | 11 | 10 | 87.73 | b3*b3b4b5b6b7b8y9*y9*y9                    | 1230.51 | 26.126  | 3308  | 2 | 615.76  | -8.13  |
| [O95810]SDPR_HUMAN Serum deprivation-response protein | 15 | Carbamidomethyl+C(2)  | QCAQVK                         | 134 | 6  | 1  | 13.7  | b4                                         | 733.38  | 30.537  | 3250  | 1 | 733.38  | 12.65  |
| [O95810]SDPR_HUMAN Serum deprivation-response protein | 16 |                       | RLENNHAQLLR                    | 140 | 11 | 9  | 51.12 | b5b6*b6b9*b9*b9y9*y9y10                    | 1363.75 | 94.533  | 71112 | 3 | 455.25  | -6.36  |
| [O95810]SDPR_HUMAN Serum deprivation-response protein | 17 |                       | GEDAAQAEKFQHPGSDMR             | 1   | 18 | 3  | 15.73 | b15y12y14                                  | 1973.86 | 84.821  | 30179 | 3 | 658.62  | -9.46  |
| [O95810]SDPR_HUMAN Serum deprivation-response protein | 18 |                       | LVNMLDAVQENQHKEQQR             | 64  | 18 | 6  | 31.31 | b6b10y5y9y14*y14                           | 2183.10 | 76.968  | 13371 | 3 | 728.37  | 13.64  |
| [O95810]SDPR_HUMAN Serum deprivation-response protein | 19 |                       | VREGESHAENETK                  | 301 | 13 | 4  | 25.6  | b8y9y10*y10                                | 1485.68 | 33.629  | 8747  | 2 | 743.34  | -11.17 |
| [O95810]SDPR_HUMAN Serum deprivation-response protein | 20 |                       | SLTSNHQKISSGK                  | 273 | 13 | 4  | 25.6  | b12*b12y11y12                              | 1386.73 | 136.808 | 5585  | 1 | 1386.73 | -5.46  |
| [O95810]SDPR_HUMAN Serum deprivation-response protein | 21 | Phosphoryl STY(4)     | QPVSGAVEGK                     | 173 | 10 | 4  | 34.11 | y3y5y6*y6                                  | 1051.47 | 34.726  | 11885 | 2 | 526.24  | -0.12  |
| [O95810]SDPR_HUMAN Serum deprivation-response protein | 22 | Phosphoryl STY(8)     | QEKPSSPSPMPSSTPSPSLNLGNTAEAIR  | 19  | 29 | 7  | 49.02 | b4b5b6*b6b7*b7y12                          | 3118.42 | 115.726 | 2080  | 3 | 1040.14 | -3.60  |
| [O95810]SDPR_HUMAN Serum deprivation-response protein | 23 | Oxidation+M(10)       | QEKPSSPSPMPSSTPSPSLNLGNTAEAIR  | 19  | 29 | 3  | 17.56 | y6y8y17                                    | 3054.47 | 72.074  | 25291 | 5 | 611.70  | -1.12  |
| [O95810]SDPR_HUMAN Serum deprivation-response protein | 24 | Oxidation+M(6)        | GSNSGMDSNIDLTIVEDEEEESVALEQAQK | 362 | 30 | 8  | 39.36 | b4b5b15y11*y11y14y15y23                    | 3253.44 | 100.266 | 3976  | 4 | 814.12  | -4.05  |
| [O95810]SDPR_HUMAN Serum deprivation-response protein | 25 |                       | NMLDAVQENQHK                   | 66  | 12 | 2  | 21.15 | b3b4                                       | 1426.69 | 59.886  | 10477 | 2 | 713.85  | 9.84   |
| [O95810]SDPR_HUMAN Serum deprivation-response protein | 26 |                       | SYALTSEEAEER                   | 397 | 11 | 1  | 7.33  | b3                                         | 1255.59 | 53.625  | 2342  | 2 | 628.30  | 4.28   |
| [O95810]SDPR_HUMAN Serum deprivation-response protein | 27 |                       | SDGDPVQPAVLQVHQTS              | 408 | 17 | 6  | 43.17 | b7b10b11b13y10y12                          | 1760.85 | 53.596  | 4818  | 2 | 880.93  | 3.67   |
| [O95810]SDPR_HUMAN Serum deprivation-response protein | 28 |                       | QPVSGAVEGK                     | 173 | 10 | 2  | 8.3   | y3*y3                                      | 954.49  | 22.996  | 3875  | 2 | 477.75  | 10.23  |
| [P09972]ALDOC_HUMAN Fructose-bisphosphate aldolase C  | 1  | Carbamidomethyl+C(5)  | YASICQQNGIVPIVEPEILPDGDHDLKR   | 173 | 28 | 16 | 98.86 | b9b10*b10b11*b11y1y2y3y5y7y8y9y10y13y17y28 | 3176.59 | 76.476  | 95521 | 4 | 794.90  | -5.99  |
| [P09972]ALDOC_HUMAN Fructose-bisphosphate aldolase C  | 2  | Carbamidomethyl+C(1)  | CIGGVIFFHETLYQKDDNGVPFVR       | 72  | 24 | 3  | 12.82 | b4b7y3                                     | 2811.42 | 83.462  | 5212  | 3 | 937.81  | 8.16   |
| [P09972]ALDOC_HUMAN Fructose-bisphosphate aldolase C  | 3  | Carbamidomethyl+C(1)  | CIGGVIFFHETLYQK                | 72  | 15 | 5  | 18.32 | b14y6*y6y8*y8                              | 1811.92 | 97.388  | 4916  | 3 | 604.64  | 0.07   |
| [P09972]ALDOC_HUMAN Fructose-bisphosphate aldolase C  | 4  | Carbamidomethyl+C(25) | ALSDHHVYLEGTLKPNMVTDPGHACPIK   | 215 | 28 | 10 | 45.22 | b3*b3b6*b6b14y8y12*y12y13y14               | 3098.54 | 91.589  | 4789  | 3 | 1033.52 | -16.23 |
| [P09972]ALDOC_HUMAN Fructose-bisphosphate aldolase C  | 5  |                       | DNAGAATEEFIK                   | 318 | 12 | 7  | 32.47 | b6*b6*b6b11*b11y4y7                        | 1265.62 | 54.425  | 3635  | 2 | 633.31  | 13.31  |
| [P09972]ALDOC_HUMAN Fructose-bisphosphate aldolase C  | 6  |                       | LSQIGVENTEENR                  | 43  | 13 | 6  | 41.7  | b8b11b12y5y12*y12                          | 1488.74 | 83.012  | 3624  | 2 | 744.87  | 7.22   |
| [P09972]ALDOC_HUMAN Fructose-bisphosphate aldolase C  | 7  |                       | TPSALAILENANVLAR               | 157 | 16 | 3  | 17.33 | b3b5y10                                    | 1652.93 | 86.185  | 3367  | 3 | 551.65  | -3.47  |

|                                                         |    |                       |                                     |     |    |    |       |                                 |         |         |        |   |         |        |
|---------------------------------------------------------|----|-----------------------|-------------------------------------|-----|----|----|-------|---------------------------------|---------|---------|--------|---|---------|--------|
| [P09972]ALDOC_HUMAN Fructose-bisphosphate aldolase C    | 8  |                       | YEGSGEDGGAAAQSLYIANHAY              | 342 | 22 | 4  | 20.08 | y4y8y12*y12                     | 2244.01 | 62.220  | 2407   | 2 | 1122.51 | 9.90   |
| [P09972]ALDOC_HUMAN Fructose-bisphosphate aldolase C    | 9  |                       | GVVPLAGTDGETTTQGLDGLSER             | 111 | 23 | 4  | 13.16 | b11b13y14*y14                   | 2273.13 | 122.618 | 2090   | 3 | 758.38  | 2.58   |
| [P09972]ALDOC_HUMAN Fructose-bisphosphate aldolase C    | 10 |                       | DNAGAATEEFIKR                       | 318 | 13 | 3  | 20.83 | b3b5y3                          | 1421.68 | 87.478  | 240004 | 2 | 711.34  | -15.03 |
| [P09972]ALDOC_HUMAN Fructose-bisphosphate aldolase C    | 11 |                       | IVAPGKGILAADES VGSMMAK              | 22  | 20 | 6  | 25.47 | b5y7*y7y8*y8y11                 | 1914.02 | 118.542 | 20556  | 3 | 638.68  | -10.59 |
| [P09972]ALDOC_HUMAN Fructose-bisphosphate aldolase C    | 12 |                       | VDKGVVPLAGTDGETTTQGLDGLSER          | 108 | 26 | 4  | 12.23 | b3b18y14*y14                    | 2615.31 | 83.729  | 2979   | 3 | 872.44  | -2.61  |
| [P09972]ALDOC_HUMAN Fructose-bisphosphate aldolase C    | 13 | Carbamidomethyl+C(1)  | CIGGVVIFHETLYQKDDNGVPFVR            | 72  | 24 | 3  | 12.82 | b3b5y11                         | 2811.40 | 86.007  | 2028   | 3 | 937.81  | 4.34   |
| [P09972]ALDOC_HUMAN Fructose-bisphosphate aldolase C    | 14 |                       | AEVNGLAAQKGK YEGSGEDGGAAQSLYIANHAY  | 331 | 33 | 4  | 11.09 | b3y8y15*y15                     | 3282.49 | 94.399  | 1935   | 3 | 1094.83 | -13.39 |
| [P09972]ALDOC_HUMAN Fructose-bisphosphate aldolase C    | 15 | Phosphoryl STY(8)     | GVVPLAGTDGETTTQGLDGLSER             | 111 | 23 | 8  | 29.76 | b18*b18y10y12*y12y14y15*y15     | 2353.05 | 90.784  | 7950   | 3 | 785.02  | -14.42 |
| [P09972]ALDOC_HUMAN Fructose-bisphosphate aldolase C    | 16 | Oxidation+M(8)        | YTPEEIAMATVTALR                     | 243 | 15 | 3  | 18.32 | b6b10y13                        | 1681.87 | 86.244  | 53746  | 3 | 561.30  | 14.81  |
| [P09972]ALDOC_HUMAN Fructose-bisphosphate aldolase C    | 17 |                       | PIVEPEILPDGDHDLKR                   | 184 | 17 | 2  | 22.31 | b3b4                            | 1943.02 | 76.474  | 5937   | 2 | 972.01  | -3.02  |
| [P09972]ALDOC_HUMAN Fructose-bisphosphate aldolase C    | 18 |                       | PEILPDGDHDLKR                       | 188 | 13 | 2  | 12.1  | b4b10                           | 1504.77 | 76.460  | 1607   | 3 | 502.26  | -4.79  |
| [P54652]HSP72_HUMAN Heat shock-related 70 kDa protein 2 | 1  |                       | IINEPTAAAIAYGLDKK                   | 172 | 17 | 9  | 51.54 | b2b14y2y5y10y13y14y15y17        | 1787.98 | 65.191  | 98382  | 3 | 596.66  | -7.03  |
| [P54652]HSP72_HUMAN Heat shock-related 70 kDa protein 2 | 2  |                       | VEIANDQGNR                          | 26  | 11 | 9  | 87.73 | b2b3y3y4y6y7y8y9y11             | 1228.63 | 36.746  | 64016  | 2 | 614.82  | 0.40   |
| [P54652]HSP72_HUMAN Heat shock-related 70 kDa protein 2 | 3  |                       | TTPSYVAFTDTER                       | 37  | 13 | 12 | 77.06 | b1b5*b5b11b13*b13y3y4y6y9y11y13 | 1487.71 | 55.524  | 50692  | 2 | 744.36  | 4.76   |
| [P54652]HSP72_HUMAN Heat shock-related 70 kDa protein 2 | 4  |                       | FEELNADLFR                          | 304 | 10 | 4  | 41.9  | y4y6*y6y8                       | 1253.62 | 74.625  | 32059  | 2 | 627.31  | 3.31   |
| [P54652]HSP72_HUMAN Heat shock-related 70 kDa protein 2 | 5  |                       | STAGDTHLGGEDFDNR                    | 223 | 16 | 6  | 25.7  | b2*b2y8y9y14y16                 | 1691.72 | 38.953  | 22571  | 3 | 564.58  | -3.17  |
| [P54652]HSP72_HUMAN Heat shock-related 70 kDa protein 2 | 6  | Carbamidomethyl+C(14) | GPAIGIDLTTYSCVGVFQHGK               | 4   | 22 | 6  | 49.46 | b15b16b17y12*y12y13             | 2277.10 | 60.037  | 11506  | 3 | 759.71  | -12.65 |
| [P54652]HSP72_HUMAN Heat shock-related 70 kDa protein 2 | 7  |                       | TLSSSTQASIEIDSLYEGVDFYTSITR         | 275 | 27 | 4  | 11.99 | b7*b7b19y11                     | 2983.42 | 64.338  | 9199   | 4 | 746.61  | -7.20  |
| [P54652]HSP72_HUMAN Heat shock-related 70 kDa protein 2 | 8  |                       | MVSHLAEFEK                          | 239 | 10 | 4  | 27.12 | b3*b3y3y8                       | 1190.61 | 54.480  | 6293   | 2 | 595.81  | 17.02  |
| [P54652]HSP72_HUMAN Heat shock-related 70 kDa protein 2 | 9  |                       | EIAEAYLGGK                          | 129 | 10 | 7  | 77.83 | b3b4b6*b6b8b9y8                 | 1050.54 | 99.361  | 5617   | 1 | 1050.54 | -6.16  |
| [P54652]HSP72_HUMAN Heat shock-related 70 kDa protein 2 | 10 |                       | QTQTFTTYSNDQSSVLVQVYEGER            | 426 | 24 | 10 | 48.54 | b6b7b8*b8b14y3*y3y6y8*y8        | 2780.26 | 96.271  | 2915   | 3 | 927.43  | -14.31 |
| [P54652]HSP72_HUMAN Heat shock-related 70 kDa protein 2 | 11 |                       | FEELNADLFRGTLEPVEK                  | 304 | 18 | 3  | 15.73 | b5b8y8                          | 2107.09 | 96.235  | 24644  | 2 | 1054.05 | 9.96   |
| [P54652]HSP72_HUMAN Heat shock-related 70 kDa protein 2 | 12 |                       | ARFEELNADLFR                        | 302 | 12 | 3  | 22.48 | b9b11y9                         | 1480.75 | 88.871  | 16619  | 2 | 740.88  | -6.18  |
| [P54652]HSP72_HUMAN Heat shock-related 70 kDa protein 2 | 13 |                       | FEDATVQSDMKHWPFR                    | 78  | 16 | 4  | 17.33 | b7*b7y8y12                      | 1993.92 | 80.331  | 11835  | 3 | 665.31  | -1.84  |
| [P54652]HSP72_HUMAN Heat shock-related 70 kDa protein 2 | 14 |                       | VQVEYKGETK                          | 103 | 10 | 6  | 34.11 | b4*b4b8b9*b9*b9                 | 1180.61 | 46.148  | 11349  | 2 | 590.81  | -6.93  |
| [P54652]HSP72_HUMAN Heat shock-related 70 kDa protein 2 | 15 | Carbamidomethyl+C(2)  | VCNPIISKLYQGGPGGGSGGGGSGASGGPTIEEVD | 604 | 35 | 3  | 16.66 | y7y11y17                        | 3231.48 | 83.156  | 6384   | 3 | 1077.83 | -13.98 |
| [P54652]HSP72_HUMAN Heat shock-related 70 kDa protein 2 | 16 |                       | STAGDTHLGGEDFDNRMVSHLAEFEK          | 223 | 26 | 3  | 12.23 | b9b16y4                         | 2863.27 | 94.835  | 4331   | 4 | 716.57  | -8.44  |
| [P54652]HSP72_HUMAN Heat shock-related 70 kDa protein 2 | 17 |                       | NQVAMNPTNTIFDAKR                    | 57  | 16 | 4  | 25.03 | b5b10*b10b12                    | 1819.91 | 91.689  | 3333   | 2 | 910.46  | 1.07   |
| [P54652]HSP72_HUMAN Heat shock-related 70 kDa protein 2 | 18 | Carbamidomethyl+C(18) | MSARGPAIGIDLTTYSCVGVFQHGK           | 0   | 26 | 5  | 18.46 | b11b14b19y10*y10                | 2722.35 | 121.118 | 3261   | 3 | 908.12  | 3.68   |

|                                                        |    |                                                |                                     |     |    |    |        |                                        |         |         |        |   |         |        |
|--------------------------------------------------------|----|------------------------------------------------|-------------------------------------|-----|----|----|--------|----------------------------------------|---------|---------|--------|---|---------|--------|
| P54652 HSP72_HUMAN Heat shock-related 70 kDa protein 2 | 19 |                                                | RTLSSSTQASIEIDSLYEGVDFYTSI<br>TR    | 274 | 28 | 3  | 22.8   | b6b12b13                               | 3139.52 | 111.242 | 2733   | 3 | 1047.18 | -7.54  |
| P54652 HSP72_HUMAN Heat shock-related 70 kDa protein 2 | 20 |                                                | EIAEAYLGGKVHSAVITVPAYFND<br>SQR     | 129 | 27 | 5  | 22.72  | b5b7b8*b8y8                            | 2935.50 | 136.313 | 2243   | 3 | 979.17  | 2.99   |
| P54652 HSP72_HUMAN Heat shock-related 70 kDa protein 2 | 21 | Oxidation+M(5)                                 | NQVAMNPTNTIFDAK                     | 57  | 15 | 4  | 18.32  | b11b13*b13y3                           | 1679.78 | 71.354  | 8833   | 2 | 840.40  | -13.30 |
| P54652 HSP72_HUMAN Heat shock-related 70 kDa protein 2 | 22 |                                                | EPTAAAIAYGLDKK                      | 175 | 14 | 0  | 4.76   |                                        | 1447.76 | 65.212  | 154553 | 2 | 724.38  | -12.90 |
| P54652 HSP72_HUMAN Heat shock-related 70 kDa protein 2 | 23 |                                                | AGDTHLGGEDFDNR                      | 225 | 14 | 0  | 4.36   |                                        | 1503.67 | 38.933  | 1902   | 2 | 752.34  | 14.94  |
| Q9BUF5 TBB6_HUMAN Tubulin beta-6 chain                 | 1  |                                                | LAVNMVFPFR                          | 252 | 10 | 15 | 101.43 | b2b5*b5y1y2y3y4y5y6y<br>7*y7y8y9*y9y10 | 1143.63 | 72.994  | 161983 | 2 | 572.32  | -2.24  |
| Q9BUF5 TBB6_HUMAN Tubulin beta-6 chain                 | 2  |                                                | AALVDLEPGTMDSVR                     | 62  | 15 | 7  | 24.34  | b13*b13y1y5y6*y6y15                    | 1573.77 | 88.056  | 21826  | 2 | 787.39  | -10.32 |
| Q9BUF5 TBB6_HUMAN Tubulin beta-6 chain                 | 3  |                                                | SGPFGQLFRPDNFIQGQTGAGNN<br>WAK      | 77  | 26 | 4  | 25.75  | b18b19y12y14                           | 2826.32 | 83.465  | 8606   | 4 | 707.34  | -17.79 |
| Q9BUF5 TBB6_HUMAN Tubulin beta-6 chain                 | 4  |                                                | FWEVISDEHGIDPAGGYVGSAL<br>QLER      | 19  | 27 | 8  | 44.64  | b4b6b11b17y8y9y13y16                   | 2960.36 | 99.382  | 3972   | 3 | 987.46  | -15.92 |
| Q9BUF5 TBB6_HUMAN Tubulin beta-6 chain                 | 5  |                                                | EEFPDRIMNTFSVMPSPK                  | 156 | 18 | 5  | 29.39  | b10b13*b13y10y11                       | 2124.98 | 108.613 | 5608   | 3 | 709.00  | -14.59 |
| Q9BUF5 TBB6_HUMAN Tubulin beta-6 chain                 | 6  | Phosphoryl STY(13)                             | AALVDLEPGTMDSVR                     | 62  | 15 | 4  | 29.7   | b4b12b14y3                             | 1653.75 | 81.565  | 7166   | 2 | 827.38  | 3.03   |
| Q9BUF5 TBB6_HUMAN Tubulin beta-6 chain                 | 7  | Oxidation+M(11)                                | AALVDLEPGTMDSVR                     | 62  | 15 | 4  | 24.34  | b12b13y4*y4                            | 1589.79 | 46.220  | 38026  | 3 | 530.60  | 5.30   |
| Q9BUF5 TBB6_HUMAN Tubulin beta-6 chain                 | 8  | Oxidation+M(8)                                 | ISEQFSAMFR                          | 380 | 10 | 3  | 27.12  | b5y3y7                                 | 1231.58 | 80.646  | 1946   | 1 | 1231.58 | -1.98  |
| P34931 HS71L_HUMAN Heat shock 70 kDa protein 1L        | 1  |                                                | VEIANDQGNR                          | 27  | 11 | 9  | 87.73  | b2b3y3y4y6y7y8y9y11                    | 1228.63 | 36.746  | 64016  | 2 | 614.82  | 0.40   |
| P34931 HS71L_HUMAN Heat shock 70 kDa protein 1L        | 2  |                                                | TTPSYVAFTDTER                       | 38  | 13 | 12 | 77.06  | b1b5*b5b11b13*b13y3y<br>4y6y9y11y13    | 1487.71 | 55.524  | 50692  | 2 | 744.36  | 4.76   |
| P34931 HS71L_HUMAN Heat shock 70 kDa protein 1L        | 3  |                                                | NALESYAFNMK                         | 541 | 11 | 3  | 24.51  | b5y3y5                                 | 1287.62 | 58.610  | 9042   | 2 | 644.31  | 13.84  |
| P34931 HS71L_HUMAN Heat shock 70 kDa protein 1L        | 4  | Carbamidomethyl+C(1)                           | CNELLSWLEVNQLAEKDEFDHK              | 575 | 22 | 4  | 21.08  | b5b9b13y11                             | 2717.32 | 102.167 | 2579   | 3 | 906.45  | 12.85  |
| P34931 HS71L_HUMAN Heat shock 70 kDa protein 1L        | 5  | Carbamidomethyl+C(6);<br>Carbamidomethyl+C(11) | LYQGGCTGPACGTGYVGRPATG<br>PTIEEVD   | 611 | 30 | 4  | 11.44  | b5*b5b12y10                            | 3080.45 | 111.379 | 30663  | 4 | 770.87  | 13.95  |
| P34931 HS71L_HUMAN Heat shock 70 kDa protein 1L        | 6  |                                                | ETAEAFLGHPVTNAVITVPAYFND<br>SQR     | 130 | 27 | 5  | 25.94  | b3b9b14b16y3                           | 2947.51 | 106.087 | 21762  | 3 | 983.17  | 15.82  |
| P34931 HS71L_HUMAN Heat shock 70 kDa protein 1L        | 7  | Carbamidomethyl+C(6)                           | ELEQMCNPIITK                        | 599 | 12 | 4  | 22.48  | b3*b3b9y6                              | 1475.69 | 39.876  | 9659   | 2 | 738.35  | -22.25 |
| P34931 HS71L_HUMAN Heat shock 70 kDa protein 1L        | 8  |                                                | HVLIFDLGGGTFDVSILTDGIFE<br>VK       | 195 | 27 | 3  | 11.99  | b11b16y9                               | 2920.55 | 105.140 | 8481   | 3 | 974.19  | 5.43   |
| P34931 HS71L_HUMAN Heat shock 70 kDa protein 1L        | 9  |                                                | ISESDK                              | 563 | 6  | 1  | 13.7   | y3                                     | 678.33  | 31.382  | 6720   | 1 | 678.33  | -0.99  |
| P34931 HS71L_HUMAN Heat shock 70 kDa protein 1L        | 10 |                                                | FNDPVVQADMK                         | 79  | 11 | 5  | 27.52  | b4*b4y4y5*y5                           | 1263.60 | 84.536  | 2355   | 1 | 1263.60 | -5.31  |
| P34931 HS71L_HUMAN Heat shock 70 kDa protein 1L        | 11 | Carbamidomethyl+C(5)                           | FEELCADLFR                          | 303 | 10 | 3  | 34.11  | y5y6y8                                 | 1299.63 | 54.671  | 1693   | 3 | 433.88  | 20.76  |
| P34931 HS71L_HUMAN Heat shock 70 kDa protein 1L        | 12 |                                                | ETAEAFLGHPVTNAVITVPAYFND<br>SQRQATK | 130 | 31 | 5  | 23.21  | b14y4y9y19y30                          | 3375.65 | 86.796  | 12530  | 5 | 675.94  | -15.12 |
| P34931 HS71L_HUMAN Heat shock 70 kDa protein 1L        | 13 |                                                | MVLDAEKYK                           | 519 | 9  | 3  | 30.71  | b4y4y7                                 | 1096.56 | 86.190  | 12408  | 1 | 1096.56 | -8.68  |
| P34931 HS71L_HUMAN Heat shock 70 kDa protein 1L        | 14 |                                                | NALESYAFNMKSVVSDGLK                 | 541 | 20 | 7  | 28.12  | b7*b7b8*b8y4y14*y14                    | 2202.08 | 58.964  | 12092  | 2 | 1101.54 | 1.77   |
| P34931 HS71L_HUMAN Heat shock 70 kDa protein 1L        | 15 |                                                | EEIERMVLDAEK                        | 514 | 12 | 4  | 26.46  | b10b11*b11y4                           | 1461.73 | 107.128 | 8970   | 2 | 731.37  | 1.50   |

|                                                    |    |                                      |                             |     |    |    |        |                                          |         |         |        |   |         |        |
|----------------------------------------------------|----|--------------------------------------|-----------------------------|-----|----|----|--------|------------------------------------------|---------|---------|--------|---|---------|--------|
| [P34931]HS71L_HUMAN Heat shock 70 kDa protein 1L   | 16 |                                      | IAAKNALESYAFNMK             | 537 | 15 | 3  | 26.4   | y4y5y11                                  | 1670.83 | 66.857  | 6124   | 3 | 557.62  | -14.61 |
| [P34931]HS71L_HUMAN Heat shock 70 kDa protein 1L   | 17 |                                      | ISESDKNK                    | 563 | 8  | 3  | 36.33  | b6y4y6                                   | 920.48  | 43.111  | 5152   | 2 | 460.74  | 11.47  |
| [P34931]HS71L_HUMAN Heat shock 70 kDa protein 1L   | 18 |                                      | YKAEDEVQR                   | 526 | 9  | 4  | 38.49  | y5y6°y6y8                                | 1137.55 | 105.183 | 2973   | 1 | 1137.55 | -2.04  |
| [P34931]HS71L_HUMAN Heat shock 70 kDa protein 1L   | 19 | Phosphoryl STY(16)                   | TLSSSTQANLEIDSLYEGIDFYTSITR | 274 | 27 | 6  | 36.23  | b8b9°b9y8y10y11                          | 3104.45 | 120.992 | 1856   | 3 | 1035.49 | 7.00   |
| [P34931]HS71L_HUMAN Heat shock 70 kDa protein 1L   | 20 | Carbamidomethyl+C(7); Oxidation+M(6) | KELEQMCNPIITK               | 598 | 13 | 3  | 28.31  | b5b10b11                                 | 1619.79 | 66.253  | 476319 | 2 | 810.40  | -12.43 |
| [P06753]TPM3_HUMAN Tropomyosin alpha-3 chain       | 1  |                                      | IQLVEEELDR                  | 91  | 10 | 17 | 101.43 | b2*b2b3y1y2y3y4°y4y5y6°y6y7y8y9°y9*y9y10 | 1243.66 | 59.541  | 441297 | 2 | 622.33  | 5.01   |
| [P06753]TPM3_HUMAN Tropomyosin alpha-3 chain       | 2  |                                      | AADAEAEVASLNRR              | 77  | 14 | 8  | 55.32  | y4*y4y7y9*y9y10y11y14                    | 1472.73 | 38.852  | 82942  | 3 | 491.58  | -8.04  |
| [P06753]TPM3_HUMAN Tropomyosin alpha-3 chain       | 3  |                                      | AADAEAEVASLNR               | 77  | 13 | 5  | 41.62  | y5y7y9y10y13                             | 1316.64 | 41.631  | 15915  | 2 | 658.82  | -3.15  |
| [P06753]TPM3_HUMAN Tropomyosin alpha-3 chain       | 4  |                                      | QLEDELAAMQK                 | 37  | 11 | 3  | 24.51  | b4y4y9                                   | 1275.61 | 74.574  | 3445   | 2 | 638.31  | -11.00 |
| [P06753]TPM3_HUMAN Tropomyosin alpha-3 chain       | 5  |                                      | AELAESK                     | 182 | 7  | 4  | 40.71  | b1b4b6y3                                 | 747.39  | 30.367  | 2858   | 2 | 374.20  | -4.41  |
| [P06753]TPM3_HUMAN Tropomyosin alpha-3 chain       | 6  | Carbamidomethyl+C(1)                 | CSELEEELK                   | 189 | 9  | 6  | 68.11  | b3b4b5°b5b6b8                            | 1136.54 | 92.937  | 139169 | 2 | 568.77  | 21.70  |
| [P06753]TPM3_HUMAN Tropomyosin alpha-3 chain       | 7  |                                      | LATALQK                     | 105 | 7  | 10 | 80.62  | b3°b3b4°b4y3y4y5°y5y6*y6                 | 744.45  | 28.933  | 40934  | 2 | 372.73  | -18.69 |
| [P06753]TPM3_HUMAN Tropomyosin alpha-3 chain       | 8  |                                      | MEAIK                       | 0   | 5  | 1  | 13.3   | y4                                       | 591.32  | 67.465  | 20014  | 1 | 591.32  | 12.70  |
| [P06753]TPM3_HUMAN Tropomyosin alpha-3 chain       | 9  |                                      | YEEEEIK                     | 220 | 6  | 3  | 40.31  | b3y4y5                                   | 810.38  | 26.165  | 18317  | 2 | 405.69  | -7.31  |
| [P06753]TPM3_HUMAN Tropomyosin alpha-3 chain       | 10 |                                      | LELAEK                      | 70  | 6  | 1  | 13.7   | b5                                       | 702.40  | 40.349  | 2321   | 1 | 702.40  | -9.04  |
| [P06753]TPM3_HUMAN Tropomyosin alpha-3 chain       | 11 |                                      | SKQLEDELAAMQK               | 35  | 13 | 3  | 28.31  | b7b8b10                                  | 1490.77 | 81.565  | 54234  | 2 | 745.89  | 12.36  |
| [P06753]TPM3_HUMAN Tropomyosin alpha-3 chain       | 12 |                                      | KLVIIEGDLER                 | 167 | 11 | 6  | 55.89  | b3b4y3y4°y4y5                            | 1284.75 | 57.826  | 31199  | 2 | 642.88  | 1.05   |
| [P06753]TPM3_HUMAN Tropomyosin alpha-3 chain       | 13 |                                      | LEKTIDDLEDELYAQK            | 248 | 16 | 6  | 17.33  | b7°b7y7°y7*y7y12                         | 1922.94 | 72.817  | 6246   | 3 | 641.65  | -10.92 |
| [P06753]TPM3_HUMAN Tropomyosin alpha-3 chain       | 14 |                                      | AADAEAEVASLNRR              | 77  | 14 | 4  | 42.02  | b6b7b8b11                                | 1472.72 | 87.227  | 2582   | 2 | 736.87  | -13.84 |
| [P06753]TPM3_HUMAN Tropomyosin alpha-3 chain       | 15 | Oxidation+M(1)                       | MELQEIQKKEAK                | 140 | 12 | 4  | 36.45  | b6b7y5y9                                 | 1475.79 | 48.891  | 91518  | 2 | 738.40  | 6.45   |
| [P06753]TPM3_HUMAN Tropomyosin alpha-3 chain       | 16 |                                      | AADAEAEVASLNRR              | 77  | 14 | 0  | 3.57   |                                          | 1454.73 | 38.850  | 12934  | 3 | 485.58  | -1.17  |
| [Q99867]TBB4Q_HUMAN Putative tubulin beta-4q chain | 1  |                                      | LAVNMVPPFR                  | 252 | 10 | 15 | 101.43 | b2b5*b5y1y2y3y4y5y6y7*y7y8y9*y9y10       | 1143.63 | 72.994  | 161983 | 2 | 572.32  | -2.24  |
| [Q99867]TBB4Q_HUMAN Putative tubulin beta-4q chain | 2  |                                      | FWEVISDEHAIDSAGTYHGDSLQLER  | 19  | 27 | 6  | 18.07  | y2y10y12*y12y14*y14                      | 3112.40 | 94.512  | 71718  | 4 | 778.85  | -13.88 |
| [Q99867]TBB4Q_HUMAN Putative tubulin beta-4q chain | 3  | Carbamidomethyl+C(3)                 | HGCYLTAIAIFR                | 306 | 12 | 6  | 44.53  | b5b7b8y9°y9y11                           | 1379.69 | 54.462  | 59324  | 2 | 690.35  | -1.06  |
| [Q99867]TBB4Q_HUMAN Putative tubulin beta-4q chain | 4  | Carbamidomethyl+C(23)                | LPTPTYGDLNHLVSATVSGVTTCLR   | 216 | 25 | 3  | 22.99  | b13b15b16                                | 2672.40 | 91.573  | 54447  | 3 | 891.47  | 11.51  |
| [Q99867]TBB4Q_HUMAN Putative tubulin beta-4q chain | 5  |                                      | MSVFTFGNNTAVQELK            | 362 | 16 | 5  | 25.7   | b8b12°b12b13°b13                         | 1739.84 | 90.891  | 13916  | 2 | 870.42  | -15.65 |
| [Q99867]TBB4Q_HUMAN Putative tubulin beta-4q chain | 6  |                                      | VSEQFTATFR                  | 379 | 10 | 5  | 27.12  | b3b6°b6y7*y7                             | 1185.61 | 101.174 | 9019   | 2 | 593.31  | 15.14  |
| [Q99867]TBB4Q_HUMAN Putative tubulin beta-4q chain | 7  | Carbamidomethyl+C(18)                | SGPFAEYFRPDNFIISRCQGAGNNWAK | 77  | 26 | 9  | 36.74  | b5°b5b9b11°b11b18y6y8y13                 | 2925.38 | 84.434  | 25906  | 4 | 732.10  | -1.17  |

|                                                     |    |                       |                                    |     |    |   |       |                           |         |         |       |   |         |        |
|-----------------------------------------------------|----|-----------------------|------------------------------------|-----|----|---|-------|---------------------------|---------|---------|-------|---|---------|--------|
| Q99867 TBB4Q_HUMAN Putative tubulin beta-4q chain   | 8  |                       | EVDEQMFNIQDKNSSYFADWLPN<br>NIK     | 324 | 26 | 5 | 22.01 | b12b13*b13*b13y10         | 3145.43 | 94.989  | 25477 | 3 | 1049.15 | -9.47  |
| Q99867 TBB4Q_HUMAN Putative tubulin beta-4q chain   | 9  |                       | GRYTEGAELMESVMDVVR                 | 103 | 18 | 9 | 54.65 | b5*b5b6*b6y5y10y11y12     | 2041.98 | 81.601  | 4521  | 2 | 1021.50 | 7.77   |
| Q99867 TBB4Q_HUMAN Putative tubulin beta-4q chain   | 10 | Phosphoryl STY(10)    | MSVTFTGNNTAVQELK                   | 362 | 16 | 5 | 17.33 | b8y7*y7y14*y14            | 1819.81 | 83.449  | 16040 | 3 | 607.28  | -3.42  |
| P11021 GRP78_HUMAN 78 kDa glucose-regulated protein | 1  |                       | VEIANDQGNR                         | 49  | 11 | 9 | 87.73 | b2b3y3y4y6y7y8y9y11       | 1228.63 | 36.746  | 64016 | 2 | 614.82  | 0.40   |
| P11021 GRP78_HUMAN 78 kDa glucose-regulated protein | 2  |                       | SQIFSTASDNQPTVTIK                  | 447 | 17 | 4 | 23.88 | b2b3b5b8                  | 1836.94 | 58.360  | 13617 | 2 | 918.98  | 4.85   |
| P11021 GRP78_HUMAN 78 kDa glucose-regulated protein | 3  |                       | ITPSYVAFTPEGER                     | 60  | 14 | 8 | 42.02 | b1y2*y2y7y9y10y11*y11     | 1566.77 | 90.021  | 7499  | 2 | 783.89  | -4.36  |
| P11021 GRP78_HUMAN 78 kDa glucose-regulated protein | 4  |                       | LYGSAGPPPTGEEDTAEK                 | 633 | 18 | 6 | 53.1  | b6b7b8b14*b14b15          | 1818.85 | 57.140  | 7321  | 2 | 909.93  | 5.23   |
| P11021 GRP78_HUMAN 78 kDa glucose-regulated protein | 5  |                       | IEWLESHQDADIEDFK                   | 601 | 16 | 3 | 25.03 | y4y10y12                  | 1974.92 | 83.070  | 18170 | 2 | 987.97  | 8.22   |
| P11021 GRP78_HUMAN 78 kDa glucose-regulated protein | 6  |                       | AVEEK                              | 596 | 5  | 3 | 26.61 | b3y4*y4                   | 575.31  | 25.823  | 17278 | 1 | 575.31  | 7.11   |
| P11021 GRP78_HUMAN 78 kDa glucose-regulated protein | 7  |                       | VYEGERPLTK                         | 464 | 10 | 3 | 28.89 | b4y7y8                    | 1191.62 | 29.428  | 13083 | 3 | 397.88  | -15.67 |
| P11021 GRP78_HUMAN 78 kDa glucose-regulated protein | 8  |                       | FEELNMDLFR                         | 326 | 10 | 4 | 41.9  | y4y6y8*y8                 | 1313.65 | 38.465  | 8521  | 3 | 438.55  | 22.58  |
| P11021 GRP78_HUMAN 78 kDa glucose-regulated protein | 9  |                       | LSSEDK                             | 585 | 6  | 1 | 13.7  | y3                        | 678.34  | 43.172  | 6673  | 1 | 678.34  | 10.26  |
| P11021 GRP78_HUMAN 78 kDa glucose-regulated protein | 10 |                       | ELEEIVQPIISK                       | 621 | 12 | 3 | 22.48 | b5b8y3                    | 1397.80 | 52.344  | 6122  | 3 | 466.60  | 6.29   |
| P11021 GRP78_HUMAN 78 kDa glucose-regulated protein | 11 | Carbamidomethyl+C(17) | EDVGTVVGIDLGTYSVGVFK               | 24  | 22 | 4 | 13.56 | b6*b6b10y13               | 2316.16 | 62.950  | 5685  | 3 | 772.73  | 7.59   |
| P11021 GRP78_HUMAN 78 kDa glucose-regulated protein | 12 |                       | NQLTSPENTVFDKAK                    | 81  | 15 | 4 | 26.4  | b3*b3b7b14                | 1677.83 | 82.971  | 1726  | 2 | 839.42  | 10.99  |
| P11021 GRP78_HUMAN 78 kDa glucose-regulated protein | 13 |                       | ALSSQHQAR                          | 297 | 9  | 9 | 60.33 | b4*b4b5b6*b6y6*y6*y6y8    | 997.50  | 108.577 | 1646  | 1 | 997.50  | -20.13 |
| P11021 GRP78_HUMAN 78 kDa glucose-regulated protein | 14 |                       | AKFEELNMDLFR                       | 324 | 12 | 7 | 37.54 | b3b5*b5b8*b8y5*y5         | 1512.76 | 81.551  | 78185 | 2 | 756.88  | 2.26   |
| P11021 GRP78_HUMAN 78 kDa glucose-regulated protein | 15 |                       | ALSSQHQARIEIESFYEGEDFSETL<br>TR    | 297 | 27 | 4 | 22.84 | y8y10*y10y11              | 3143.53 | 107.948 | 37549 | 4 | 786.64  | 12.04  |
| P11021 GRP78_HUMAN 78 kDa glucose-regulated protein | 16 |                       | ELEEIVQPIISKLYGSAGPPPTGEED<br>TAEK | 621 | 30 | 4 | 11.44 | b6b11y12*y12              | 3197.60 | 80.579  | 21663 | 3 | 1066.54 | -4.50  |
| P11021 GRP78_HUMAN 78 kDa glucose-regulated protein | 17 |                       | FEELNMDLFRSTMKPVQK                 | 326 | 18 | 6 | 25.06 | b4*b4b13*b13b15y14        | 2213.08 | 60.005  | 20802 | 3 | 738.36  | -15.00 |
| P11021 GRP78_HUMAN 78 kDa glucose-regulated protein | 18 |                       | ITPSYVAFTPEGERLIGDAAK              | 60  | 21 | 3 | 14.01 | b4b7y12                   | 2235.15 | 69.713  | 18839 | 4 | 559.54  | -6.99  |
| P11021 GRP78_HUMAN 78 kDa glucose-regulated protein | 19 |                       | IDTRNELESYAYSLK                    | 558 | 15 | 6 | 32.08 | b9*b9b10y3y9*y9           | 1801.90 | 69.598  | 7082  | 2 | 901.46  | 3.59   |
| P11021 GRP78_HUMAN 78 kDa glucose-regulated protein | 20 |                       | LYGSAGPPPTGEEDTAEKDEL              | 633 | 21 | 3 | 14.01 | b14y9y17                  | 2175.97 | 77.335  | 4909  | 3 | 726.00  | -9.09  |
| P11021 GRP78_HUMAN 78 kDa glucose-regulated protein | 21 |                       | AVEEKIEWLESHQDADIEDFK              | 596 | 21 | 5 | 31.02 | y4y8y10*y10y20            | 2531.20 | 102.058 | 3042  | 2 | 1266.10 | 0.96   |
| P11021 GRP78_HUMAN 78 kDa glucose-regulated protein | 22 |                       | LTPEEIERMVNDAEK                    | 532 | 15 | 5 | 26.06 | b5b7y8*y8y10              | 1773.84 | 55.488  | 2294  | 2 | 887.43  | -14.24 |
| P11021 GRP78_HUMAN 78 kDa glucose-regulated protein | 23 |                       | IEWLESHQDADIEDFKAK                 | 601 | 18 | 5 | 15.73 | b3*b3b7y6*y6              | 2174.07 | 118.545 | 2259  | 3 | 725.36  | 14.71  |
| P11021 GRP78_HUMAN 78 kDa glucose-regulated protein | 24 |                       | ETMEKAVEEK                         | 591 | 10 | 5 | 28.89 | b6b7*b7y3*y3              | 1193.57 | 20.585  | 1993  | 2 | 597.29  | 1.74   |
| P11021 GRP78_HUMAN 78 kDa glucose-regulated protein | 25 | Phosphoryl STY(4)     | NQLTSPENTVFDKAK                    | 81  | 15 | 4 | 26.4  | y6y10*y10y13_H3PO4<br>y13 | 1757.77 | 88.809  | 22919 | 3 | 586.59  | 3.13   |
| P11021 GRP78_HUMAN 78 kDa glucose-regulated protein | 26 | Phosphoryl STY(8)     | QATKDAGTIAGLNVMR                   | 181 | 16 | 4 | 17.33 | b6y4y10*y10               | 1725.82 | 54.257  | 2013  | 2 | 863.41  | -3.89  |

|                                                |    |                                                |                                    |     |    |    |       |                                         |         |         |        |   |         |        |
|------------------------------------------------|----|------------------------------------------------|------------------------------------|-----|----|----|-------|-----------------------------------------|---------|---------|--------|---|---------|--------|
| P08107 HSP71_HUMAN Heat shock 70 kDa protein 1 | 1  |                                                | VEIANDQGNR                         | 25  | 11 | 9  | 87.73 | b2b3y3y4y6y7y8y9y11                     | 1228.63 | 36.746  | 64016  | 2 | 614.82  | 0.40   |
| P08107 HSP71_HUMAN Heat shock 70 kDa protein 1 | 2  |                                                | TTPSYVAFTDTER                      | 36  | 13 | 12 | 77.06 | b1b5*b5b11b13*b13y3y4y6y9y11y13         | 1487.71 | 55.524  | 50692  | 2 | 744.36  | 4.76   |
| P08107 HSP71_HUMAN Heat shock 70 kDa protein 1 | 3  |                                                | NALESYAFNMK                        | 539 | 11 | 3  | 24.51 | b5y3y5                                  | 1287.62 | 58.610  | 9042   | 2 | 644.31  | 13.84  |
| P08107 HSP71_HUMAN Heat shock 70 kDa protein 1 | 4  |                                                | SINPDEAVAYGAAVQAAILMGDK            | 361 | 23 | 7  | 24.84 | b3*b3b5b21y4y12*y12                     | 2304.13 | 70.014  | 153099 | 4 | 576.79  | -12.19 |
| P08107 HSP71_HUMAN Heat shock 70 kDa protein 1 | 5  | Carbamidomethyl+C(1)                           | CQEVISWLDANTLAEK                   | 573 | 16 | 7  | 49.21 | b6b8b10b13*b13y8y15                     | 1876.94 | 75.369  | 30882  | 2 | 938.97  | 15.80  |
| P08107 HSP71_HUMAN Heat shock 70 kDa protein 1 | 6  |                                                | AQIHDLVLVGGSTR                     | 328 | 14 | 4  | 19.47 | b4*b4y7y10                              | 1465.78 | 55.686  | 17101  | 2 | 733.39  | -21.82 |
| P08107 HSP71_HUMAN Heat shock 70 kDa protein 1 | 7  |                                                | ATAGDTHLGGEDFDNR                   | 220 | 16 | 3  | 25.7  | y4y5y10                                 | 1675.76 | 39.164  | 16379  | 3 | 559.26  | 17.63  |
| P08107 HSP71_HUMAN Heat shock 70 kDa protein 1 | 8  | Carbamidomethyl+C(6)                           | ELEQVCNPIISGLYQGAGGPGGG<br>FGAQGPK | 597 | 31 | 7  | 24.64 | b13b15*b15y10*y10y15<br>y16             | 3055.52 | 102.090 | 6074   | 3 | 1019.18 | 9.03   |
| P08107 HSP71_HUMAN Heat shock 70 kDa protein 1 | 9  |                                                | FGDPVVQSDMK                        | 77  | 11 | 6  | 65.89 | y3y4y5y6*y6y8                           | 1222.60 | 99.336  | 2153   | 1 | 1222.60 | 21.57  |
| P08107 HSP71_HUMAN Heat shock 70 kDa protein 1 | 10 |                                                | GGSGSGPTIEEVD                      | 628 | 13 | 4  | 20.83 | b6b10*b10y8                             | 1204.55 | 33.511  | 1937   | 3 | 402.19  | 13.88  |
| P08107 HSP71_HUMAN Heat shock 70 kDa protein 1 | 11 | Phosphoryl STY()                               | AFYPEEISSMVLTK                     | 112 | 14 | 5  | 40.18 | b7_H3PO4<br>b7b13y7_HPO3<br>y7y9y11     | 1694.78 | 57.181  | 564867 | 3 | 565.60  | 9.72   |
| P08107 HSP71_HUMAN Heat shock 70 kDa protein 1 | 12 | Phosphoryl STY(12)                             | IINEPTAAAIAYGLDR                   | 171 | 16 | 8  | 24.52 | b13*b13b15*b15*b15y4<br>y10*y10         | 1767.85 | 105.298 | 168228 | 2 | 884.43  | -6.15  |
| P08107 HSP71_HUMAN Heat shock 70 kDa protein 1 | 13 | Carbamidomethyl+C(1);<br>Phosphoryl STY(6)     | CQEVISWLDANTLAEK                   | 573 | 16 | 3  | 25.7  | y10y11_HPO3 y11y13                      | 1956.87 | 86.854  | 15119  | 3 | 652.96  | 2.25   |
| P08107 HSP71_HUMAN Heat shock 70 kDa protein 1 | 14 | Oxidation+M(1)                                 | MKEIAEAYLGYPVTVNAVITVPAYF<br>NDSQR | 126 | 29 | 5  | 49    | b8b9b10y4y5                             | 3276.66 | 103.873 | 6585   | 4 | 819.92  | 12.22  |
| P08107 HSP71_HUMAN Heat shock 70 kDa protein 1 | 15 |                                                | TTPSYVAF                           | 36  | 8  | 1  | 7.45  | y5                                      | 885.42  | 55.444  | 4187   | 1 | 885.42  | -11.79 |
| P08107 HSP71_HUMAN Heat shock 70 kDa protein 1 | 16 |                                                | TTPSYVAFTDTER                      | 36  | 13 | 0  | 3.17  |                                         | 1469.70 | 55.551  | 4487   | 2 | 735.35  | 9.88   |
| P08514 ITA2B_HUMAN Integrin alpha-IIb          | 1  |                                                | ALSNVEGFER                         | 692 | 10 | 15 | 74.82 | b2b5*b5*b5y3*y3y4*y4y5y6*y6y8*y8y10*y10 | 1121.56 | 48.443  | 40565  | 2 | 561.29  | 5.12   |
| P08514 ITA2B_HUMAN Integrin alpha-IIb          | 2  | Carbamidomethyl+C(4)                           | VVLCELGNPMKK                       | 714 | 12 | 3  | 22.48 | b10y9y11                                | 1387.73 | 54.328  | 27799  | 3 | 463.25  | -10.56 |
| P08514 ITA2B_HUMAN Integrin alpha-IIb          | 3  |                                                | NVGSQTLQTFK                        | 108 | 11 | 7  | 41.79 | b2b3*b3b7b9y9y11                        | 1222.64 | 48.497  | 19313  | 2 | 611.82  | -2.80  |
| P08514 ITA2B_HUMAN Integrin alpha-IIb          | 4  |                                                | VAIVVGAPR                          | 63  | 9  | 6  | 45.77 | b2b3y5y6y8y9                            | 881.55  | 46.713  | 17250  | 2 | 441.28  | -3.60  |
| P08514 ITA2B_HUMAN Integrin alpha-IIb          | 5  |                                                | DGYNDIAVAAPYGGPSGR                 | 399 | 18 | 3  | 15.73 | b14y7y9                                 | 1779.86 | 67.056  | 16013  | 3 | 593.96  | 14.54  |
| P08514 ITA2B_HUMAN Integrin alpha-IIb          | 6  |                                                | SRPSQVLDSFPFTGSAFGFSLR             | 431 | 22 | 3  | 13.56 | b10b15y10                               | 2353.19 | 87.085  | 13850  | 3 | 785.07  | -3.42  |
| P08514 ITA2B_HUMAN Integrin alpha-IIb          | 7  |                                                | IYVENDFSWDKR                       | 184 | 12 | 3  | 26.46 | b9b10y5                                 | 1571.75 | 74.126  | 11493  | 3 | 524.59  | 2.87   |
| P08514 ITA2B_HUMAN Integrin alpha-IIb          | 8  | Carbamidomethyl+C(5)                           | HSPICHTTMAFLRDEADFR                | 571 | 19 | 4  | 22.04 | y9y11*y11y13                            | 2304.09 | 105.377 | 4308   | 2 | 1152.55 | 12.82  |
| P08514 ITA2B_HUMAN Integrin alpha-IIb          | 9  |                                                | HDLLVGAPLYMESR                     | 334 | 14 | 3  | 24.91 | b11b12y8                                | 1600.81 | 107.720 | 1669   | 2 | 800.91  | -3.43  |
| P08514 ITA2B_HUMAN Integrin alpha-IIb          | 10 | Carbamidomethyl+C(5);<br>Carbamidomethyl+C(11) | TPVSCFNQMCVGGATGHNIPQK             | 510 | 22 | 4  | 13.56 | b8*b8b11y13                             | 2459.15 | 68.543  | 30126  | 3 | 820.39  | -4.86  |



|                                                          |    |                                                                          |                                      |     |    |    |       |                                     |         |         |       |   |         |        |
|----------------------------------------------------------|----|--------------------------------------------------------------------------|--------------------------------------|-----|----|----|-------|-------------------------------------|---------|---------|-------|---|---------|--------|
| P08514 ITA2B_HUMAN Integrin alpha-IIB                    | 11 | Carbamidomethyl+C(9);<br>Carbamidomethyl+C(14);<br>Carbamidomethyl+C(19) | LQDPVLVSCDSAPCTVVQCQLQE<br>MAR       | 902 | 26 | 11 | 60.51 | b3b5b9b10°b10*b10b15<br>b18b22y3y10 | 2991.43 | 89.977  | 22115 | 5 | 599.09  | 20.73  |
| P08514 ITA2B_HUMAN Integrin alpha-IIB                    | 12 |                                                                          | GPHALGAPSLLLTGTQLYGR                 | 366 | 20 | 4  | 28.12 | b3b10y6y7                           | 2022.10 | 78.172  | 19076 | 3 | 674.71  | -5.67  |
| P08514 ITA2B_HUMAN Integrin alpha-IIB                    | 13 | Carbamidomethyl+C(3)                                                     | LICNQK                               | 702 | 6  | 1  | 13.7  | b5                                  | 775.41  | 27.705  | 14484 | 2 | 388.21  | -3.38  |
| P08514 ITA2B_HUMAN Integrin alpha-IIB                    | 14 |                                                                          | AQPVVK                               | 480 | 6  | 2  | 13.7  | b4*b4                               | 641.40  | 61.525  | 13744 | 1 | 641.40  | 4.38   |
| P08514 ITA2B_HUMAN Integrin alpha-IIB                    | 15 |                                                                          | FGSAIAPLGLDR                         | 386 | 13 | 5  | 29.95 | b4°b4b12y8y12                       | 1331.73 | 73.971  | 13401 | 2 | 666.37  | 22.55  |
| P08514 ITA2B_HUMAN Integrin alpha-IIB                    | 16 | Carbamidomethyl+C(6)                                                     | TPVGSCFLAQPEGR                       | 155 | 15 | 4  | 24.34 | b12°b12b13y5                        | 1605.76 | 81.529  | 4735  | 2 | 803.39  | -3.42  |
| P08514 ITA2B_HUMAN Integrin alpha-IIB                    | 17 |                                                                          | EQNSLDSWGPK                          | 799 | 11 | 3  | 27.52 | b7y4y5                              | 1260.60 | 38.392  | 4252  | 2 | 630.81  | 15.20  |
| P08514 ITA2B_HUMAN Integrin alpha-IIB                    | 18 |                                                                          | IYVENDFSWDK                          | 184 | 11 | 4  | 35.6  | b6b10y3y5                           | 1415.68 | 90.105  | 1893  | 2 | 708.34  | 20.26  |
| P08514 ITA2B_HUMAN Integrin alpha-IIB                    | 19 | Carbamidomethyl+C(12)                                                    | TEEAETKTPVGSCFLAQPEGR                | 149 | 21 | 3  | 20.65 | y4y6y10                             | 2293.10 | 79.060  | 13097 | 3 | 765.04  | 9.48   |
| P08514 ITA2B_HUMAN Integrin alpha-IIB                    | 20 |                                                                          | FGSAIAPLGLDRDGYNDIAVAAP<br>YGGPSGR   | 386 | 31 | 4  | 11.31 | b12°b12y4y11                        | 3092.54 | 91.556  | 5356  | 3 | 1031.52 | 9.39   |
| P08514 ITA2B_HUMAN Integrin alpha-IIB                    | 21 |                                                                          | LSLNAELQLDRQKPR                      | 532 | 15 | 6  | 18.32 | b14°b14y9°y9y12*y12                 | 1780.99 | 136.773 | 4986  | 1 | 1780.99 | -5.48  |
| P08514 ITA2B_HUMAN Integrin alpha-IIB                    | 22 |                                                                          | GPHALGAPSLLLTGTQLYGRFGSA<br>IAPLGLDR | 366 | 33 | 5  | 21.72 | b7y4y5y7°y7                         | 3334.74 | 124.269 | 4687  | 3 | 1112.25 | -13.91 |
| P08514 ITA2B_HUMAN Integrin alpha-IIB                    | 23 | Carbamidomethyl+C(24)                                                    | VAIVVGAPRTLGPSQEETGGVFLC<br>PWR      | 63  | 27 | 4  | 22.72 | b4y5y7y8                            | 2896.50 | 110.363 | 3018  | 3 | 966.17  | -5.98  |
| P08514 ITA2B_HUMAN Integrin alpha-IIB                    | 24 | Carbamidomethyl+C(5)                                                     | HSPICHTTMAFLRDEADFR                  | 571 | 19 | 3  | 24.26 | y7y8y12                             | 2304.04 | 94.372  | 2111  | 3 | 768.69  | -10.60 |
| P08514 ITA2B_HUMAN Integrin alpha-IIB                    | 25 |                                                                          | LRAEQMASYFGHSAVAVTDVNGD<br>GR        | 310 | 24 | 3  | 12.82 | b11b13y15                           | 2580.24 | 68.174  | 1786  | 3 | 860.75  | 6.72   |
| P08514 ITA2B_HUMAN Integrin alpha-IIB                    | 26 | Phosphoryl STY(8)                                                        | IYVENDFSWDKR                         | 184 | 12 | 3  | 22.48 | b4b6y6_H3PO4 y6                     | 1651.71 | 46.084  | 8669  | 2 | 826.36  | 1.03   |
| P08514 ITA2B_HUMAN Integrin alpha-IIB                    | 27 | Carbamidomethyl+C(5);<br>Oxidation+M(9)                                  | HSPICHTTMAFLRDEADFRDK                | 571 | 21 | 4  | 23.66 | b5°b5b12b13                         | 2563.17 | 87.859  | 6696  | 3 | 855.06  | -5.24  |
| P08514 ITA2B_HUMAN Integrin alpha-IIB                    | 28 |                                                                          | DGYNDIAVAAP                          | 399 | 11 | 1  | 7.32  | y9                                  | 1105.52 | 67.013  | 4683  | 1 | 1105.52 | 0.77   |
| P08514 ITA2B_HUMAN Integrin alpha-IIB                    | 29 |                                                                          | IYVENDFSWDKR                         | 184 | 12 | 0  | 2.78  |                                     | 1553.75 | 74.169  | 2279  | 2 | 777.38  | 13.59  |
| Q6Q0C0 TRAF7_HUMAN E3 ubiquitin-<br>protein ligase TRAF7 | 1  | Carbamidomethyl+C(12);<br>Carbamidomethyl+C(14)                          | GTFVGHQGPVWCLCVYSMGDLL<br>FSGSSDK    | 389 | 29 | 11 | 43.93 | b6b8°b8b9°b9b11°b11y<br>3y8y12y13   | 3204.51 | 126.812 | 5763  | 3 | 1068.84 | 14.78  |
| Q6Q0C0 TRAF7_HUMAN E3 ubiquitin-<br>protein ligase TRAF7 | 2  |                                                                          | TPSSSSTLAYSPR                        | 58  | 13 | 3  | 20.83 | b3b9y11                             | 1353.66 | 63.773  | 2953  | 2 | 677.33  | -1.35  |
| Q6Q0C0 TRAF7_HUMAN E3 ubiquitin-<br>protein ligase TRAF7 | 3  | Carbamidomethyl+C(8)                                                     | LYSGSADCTIIVWDIQLNQK                 | 451 | 20 | 3  | 14.51 | b11y4y12                            | 2324.13 | 64.754  | 58477 | 3 | 775.38  | -13.13 |
| Q6Q0C0 TRAF7_HUMAN E3 ubiquitin-<br>protein ligase TRAF7 | 4  |                                                                          | FSGGPSNLPTPDVTTGTR                   | 11  | 18 | 4  | 25.06 | b7b13b17y12                         | 1803.85 | 92.086  | 33973 | 3 | 601.95  | -22.13 |
| Q6Q0C0 TRAF7_HUMAN E3 ubiquitin-<br>protein ligase TRAF7 | 5  |                                                                          | LSAR                                 | 215 | 4  | 1  | 12.91 | b3                                  | 446.27  | 35.284  | 29736 | 1 | 446.27  | 1.64   |
| Q6Q0C0 TRAF7_HUMAN E3 ubiquitin-<br>protein ligase TRAF7 | 6  | Carbamidomethyl+C(1);<br>Carbamidomethyl+C(7)                            | CPNNPSCPPLLR                         | 232 | 12 | 5  | 22.48 | b10y7y10°y10*y10                    | 1424.70 | 98.342  | 24695 | 3 | 475.57  | 19.11  |
| Q6Q0C0 TRAF7_HUMAN E3 ubiquitin-<br>protein ligase TRAF7 | 7  |                                                                          | DASMLNDELSHINAR                      | 356 | 15 | 4  | 18.32 | b5°b5b10y9                          | 1685.79 | 59.946  | 15911 | 3 | 562.60  | -0.87  |
| Q6Q0C0 TRAF7_HUMAN E3 ubiquitin-<br>protein ligase TRAF7 | 8  |                                                                          | LSEDLMEFR                            | 346 | 9  | 3  | 46.27 | y4y6y8                              | 1139.52 | 26.147  | 8547  | 2 | 570.26  | -18.96 |

|                                                                      |    |                                                                                                     |                                         |     |    |    |       |                                      |         |         |       |   |         |        |
|----------------------------------------------------------------------|----|-----------------------------------------------------------------------------------------------------|-----------------------------------------|-----|----|----|-------|--------------------------------------|---------|---------|-------|---|---------|--------|
| Q6Q0C0 TRAF7_HUMAN E3 ubiquitin-protein ligase TRAF7                 | 9  | Carbamidomethyl+C(7);<br>Carbamidomethyl+C(12)                                                      | DPVITTCGHTFCR                           | 139 | 13 | 3  | 20.83 | b11y4y12                             | 1563.70 | 55.476  | 5562  | 3 | 521.91  | -0.31  |
| Q6Q0C0 TRAF7_HUMAN E3 ubiquitin-protein ligase TRAF7                 | 10 | Carbamidomethyl+C(9)                                                                                | VWSMDNMICTQTLLR                         | 626 | 15 | 4  | 38.15 | b5y9y10y11                           | 1867.87 | 99.326  | 4461  | 4 | 467.72  | -10.39 |
| Q6Q0C0 TRAF7_HUMAN E3 ubiquitin-protein ligase TRAF7                 | 11 |                                                                                                     | LNMGILGSYDPQQIFK                        | 371 | 16 | 3  | 17.33 | b4y9y15                              | 1823.90 | 62.554  | 4138  | 2 | 912.45  | -19.94 |
| Q6Q0C0 TRAF7_HUMAN E3 ubiquitin-protein ligase TRAF7                 | 12 |                                                                                                     | HQGSVTALAVSR                            | 641 | 12 | 4  | 22.48 | b6*b6y4y7                            | 1225.67 | 31.249  | 3552  | 2 | 613.34  | 1.59   |
| Q6Q0C0 TRAF7_HUMAN E3 ubiquitin-protein ligase TRAF7                 | 13 |                                                                                                     | FDVLDENQSK                              | 336 | 10 | 3  | 27.12 | b6b9y6                               | 1194.55 | 85.926  | 3441  | 2 | 597.78  | -15.12 |
| Q6Q0C0 TRAF7_HUMAN E3 ubiquitin-protein ligase TRAF7                 | 14 | Carbamidomethyl+C(7)                                                                                | AHDNPVCTLVSSHNVLFSGSLK                  | 476 | 22 | 3  | 22.31 | b14y10y11                            | 2382.17 | 74.568  | 2628  | 3 | 794.73  | -5.12  |
| Q6Q0C0 TRAF7_HUMAN E3 ubiquitin-protein ligase TRAF7                 | 15 |                                                                                                     | SLHSESSMLR                              | 93  | 11 | 3  | 27.52 | b3y5y6                               | 1233.61 | 86.228  | 1898  | 2 | 617.31  | 17.91  |
| Q6Q0C0 TRAF7_HUMAN E3 ubiquitin-protein ligase TRAF7                 | 16 | Carbamidomethyl+C(26);<br>Carbamidomethyl+C(27);<br>Carbamidomethyl+C(30);<br>Carbamidomethyl+C(31) | STFSLPEEEEEPEPLVFAEQPSVKL<br>CCQLCCSVFK | 104 | 35 | 3  | 10.96 | b5b12y5                              | 4173.95 | 108.686 | 80375 | 5 | 835.60  | 8.19   |
| Q6Q0C0 TRAF7_HUMAN E3 ubiquitin-protein ligase TRAF7                 | 17 | Carbamidomethyl+C(12);<br>Carbamidomethyl+C(14)                                                     | GTFVGHQGPVWCLCVYSMDLL<br>FSGSSDKTIK     | 389 | 32 | 5  | 11.19 | b9*b9b14*b14y26                      | 3546.64 | 114.303 | 44944 | 4 | 887.41  | -13.77 |
| Q6Q0C0 TRAF7_HUMAN E3 ubiquitin-protein ligase TRAF7                 | 18 |                                                                                                     | SLELKFVDLLENQSK                         | 331 | 15 | 4  | 18.32 | b13y9y11*y11                         | 1764.88 | 91.719  | 38419 | 3 | 588.96  | -14.59 |
| Q6Q0C0 TRAF7_HUMAN E3 ubiquitin-protein ligase TRAF7                 | 19 |                                                                                                     | FEGLKEFLQTTDDR                          | 283 | 14 | 4  | 31.01 | b6y3y4y9                             | 1725.87 | 84.560  | 23959 | 3 | 575.96  | 12.24  |
| Q6Q0C0 TRAF7_HUMAN E3 ubiquitin-protein ligase TRAF7                 | 20 | Carbamidomethyl+C(7);<br>Carbamidomethyl+C(12)                                                      | DPVITTCGHTFCRR                          | 139 | 14 | 4  | 31.01 | b6y3y4y10                            | 1719.82 | 88.803  | 10822 | 3 | 573.94  | 5.89   |
| Q6Q0C0 TRAF7_HUMAN E3 ubiquitin-protein ligase TRAF7                 | 21 | Carbamidomethyl+C(3);<br>Carbamidomethyl+C(19)                                                      | YGCTFIGNQDITYETHLETFRFGL<br>K           | 263 | 25 | 3  | 18.73 | y3y8y19                              | 3039.37 | 80.312  | 5103  | 3 | 1013.80 | 4.42   |
| Q6Q0C0 TRAF7_HUMAN E3 ubiquitin-protein ligase TRAF7                 | 22 | Phosphoryl STY(10)                                                                                  | TPSSSSTLAYSPPR                          | 58  | 13 | 4  | 28.31 | b3b8b9*b9                            | 1433.62 | 54.457  | 13440 | 2 | 717.32  | 1.53   |
| Q6Q0C0 TRAF7_HUMAN E3 ubiquitin-protein ligase TRAF7                 | 23 | Phosphoryl STY(10)                                                                                  | FSGGPSNLPTPDVTTGTR                      | 11  | 18 | 5  | 26.82 | b9*b9y7y10y11                        | 1883.84 | 46.241  | 2972  | 2 | 942.43  | 0.19   |
| Q6Q0C0 TRAF7_HUMAN E3 ubiquitin-protein ligase TRAF7                 | 24 | Carbamidomethyl+C(7);<br>Phosphoryl STY(11)                                                         | AHDNPVCTLVSSHNVLFSGSLK                  | 476 | 22 | 8  | 30.96 | b6*b6b9_H3PO4<br>b9b12b15y12*y12*y12 | 2462.12 | 102.834 | 1775  | 3 | 821.38  | -8.43  |
| Q05209 PTN12_HUMAN Tyrosine-protein phosphatase non-receptor type 12 | 1  |                                                                                                     | AIAQLFEK                                | 288 | 8  | 6  | 33.32 | b2b3y2*y2y3y4                        | 919.52  | 48.403  | 31572 | 2 | 460.26  | -3.39  |
| Q05209 PTN12_HUMAN Tyrosine-protein phosphatase non-receptor type 12 | 2  |                                                                                                     | IADGVNEINTENMISSIEPEK                   | 308 | 21 | 3  | 21.19 | b11b12*b12                           | 2303.11 | 72.979  | 4553  | 3 | 768.38  | 1.70   |
| Q05209 PTN12_HUMAN Tyrosine-protein phosphatase non-receptor type 12 | 3  | Carbamidomethyl+C(14)                                                                               | MIWEYNVVIIVMACR                         | 119 | 15 | 7  | 59.78 | b7b9y2y3y4y5y6                       | 1896.95 | 108.603 | 3058  | 2 | 948.98  | -2.12  |
| Q05209 PTN12_HUMAN Tyrosine-protein phosphatase non-receptor type 12 | 4  |                                                                                                     | TPESFVLASEHNTPVR                        | 680 | 16 | 10 | 81.04 | b8b9b10y7*y7y8*y8y11<br>y12y15       | 1783.91 | 69.617  | 60106 | 3 | 595.31  | 8.69   |
| Q05209 PTN12_HUMAN Tyrosine-protein phosphatase non-receptor type 12 | 5  |                                                                                                     | TNISTASATVSAATSTESISTR                  | 621 | 22 | 5  | 21.08 | b11y6*y6y12y15                       | 2156.05 | 76.506  | 8302  | 4 | 539.77  | -6.79  |
| Q05209 PTN12_HUMAN Tyrosine-protein phosphatase non-receptor type 12 | 6  |                                                                                                     | TPSQSDYINANFIK                          | 80  | 15 | 3  | 24.34 | b9b10y9                              | 1712.80 | 71.180  | 8063  | 3 | 571.61  | -6.06  |

|                                                                       |    |                      |                                      |     |    |   |       |                             |         |         |        |   |         |        |
|-----------------------------------------------------------------------|----|----------------------|--------------------------------------|-----|----|---|-------|-----------------------------|---------|---------|--------|---|---------|--------|
| [Q05209]PTN12_HUMAN Tyrosine-protein phosphatase non-receptor type 12 | 7  |                      | TVSLTPSPPTQVETPDLVDHDNTS<br>PLFR     | 564 | 28 | 3 | 11.78 | b9y4y7                      | 3067.57 | 94.243  | 6412   | 3 | 1023.20 | 16.00  |
| [Q05209]PTN12_HUMAN Tyrosine-protein phosphatase non-receptor type 12 | 8  |                      | HNIAGTTHSGAEK                        | 652 | 13 | 6 | 41.7  | b3b6b7y5*y5y12              | 1322.66 | 66.143  | 3465   | 2 | 661.83  | 9.32   |
| [Q05209]PTN12_HUMAN Tyrosine-protein phosphatase non-receptor type 12 | 9  | Carbamidomethyl+C(5) | TGAICAIDYTNLLK                       | 237 | 15 | 4 | 24.34 | b14y10y11*y11               | 1738.86 | 136.741 | 3369   | 1 | 1738.86 | -10.60 |
| [Q05209]PTN12_HUMAN Tyrosine-protein phosphatase non-receptor type 12 | 10 |                      | IPEEFNVFNLIQEMR                      | 255 | 15 | 9 | 48.83 | b5b7*b7b10y3y4*y4*y4<br>y14 | 1878.90 | 90.847  | 3356   | 4 | 470.48  | -19.88 |
| [Q05209]PTN12_HUMAN Tyrosine-protein phosphatase non-receptor type 12 | 11 |                      | TLLLEFQNESR                          | 176 | 11 | 6 | 31.5  | y4*y4y5*y5*y5y7             | 1349.69 | 63.773  | 3072   | 2 | 675.35  | -10.40 |
| [Q05209]PTN12_HUMAN Tyrosine-protein phosphatase non-receptor type 12 | 12 |                      | SEGLITSENEK                          | 712 | 11 | 4 | 31.5  | y7*y7y9y10                  | 1206.57 | 88.863  | 2191   | 1 | 1206.57 | -10.02 |
| [Q05209]PTN12_HUMAN Tyrosine-protein phosphatase non-receptor type 12 | 13 |                      | IYPTATGEK                            | 46  | 9  | 3 | 30.71 | b6y5y6                      | 979.52  | 54.424  | 1693   | 2 | 490.26  | 8.29   |
| [Q05209]PTN12_HUMAN Tyrosine-protein phosphatase non-receptor type 12 | 14 |                      | TPLSFTNPLHSDDSDSDER                  | 592 | 19 | 3 | 24.26 | b12b13b15                   | 2132.98 | 70.485  | 1653   | 3 | 711.66  | 19.80  |
| [Q05209]PTN12_HUMAN Tyrosine-protein phosphatase non-receptor type 12 | 15 | Carbamidomethyl+C(5) | TGAICAIDYTNLLKAGK                    | 237 | 18 | 3 | 22.89 | b3b9b11                     | 1995.02 | 48.479  | 280948 | 3 | 665.68  | -10.03 |
| [Q05209]PTN12_HUMAN Tyrosine-protein phosphatase non-receptor type 12 | 16 |                      | REQISENPTEATDIGFGNR                  | 746 | 19 | 7 | 39.51 | b6b9b10b13*b13y5y8          | 2134.05 | 59.005  | 73518  | 2 | 1067.53 | 14.87  |
| [Q05209]PTN12_HUMAN Tyrosine-protein phosphatase non-receptor type 12 | 17 |                      | KSEGLITSENEK                         | 711 | 12 | 5 | 45.2  | y3*y3y5y6y11                | 1334.66 | 45.179  | 14677  | 2 | 667.84  | -11.62 |
| [Q05209]PTN12_HUMAN Tyrosine-protein phosphatase non-receptor type 12 | 18 |                      | NSDGAVTQNKTNISTASATVSAA<br>TSTESISTR | 611 | 32 | 3 | 22.84 | y10y15y16                   | 3170.52 | 107.878 | 5090   | 3 | 1057.51 | -6.93  |
| [Q05209]PTN12_HUMAN Tyrosine-protein phosphatase non-receptor type 12 | 19 | Carbamidomethyl+C(4) | TRSCLVEGDAK                          | 339 | 11 | 3 | 24.51 | b5y3y6                      | 1235.59 | 64.817  | 3959   | 2 | 618.30  | -13.34 |
| [Q05209]PTN12_HUMAN Tyrosine-protein phosphatase non-receptor type 12 | 20 |                      | SPDHNGEDNFARDFMR                     | 18  | 16 | 4 | 25.03 | y5y9*y9y11                  | 1907.83 | 52.321  | 2384   | 2 | 954.42  | 11.65  |
| [Q05209]PTN12_HUMAN Tyrosine-protein phosphatase non-receptor type 12 | 21 | Phosphoryl STY(11)   | YWPLYGEDPITFAPFK                     | 145 | 16 | 4 | 27.92 | b3b6b9_H3PO4 b9y7           | 2023.94 | 53.596  | 9498   | 3 | 675.32  | 12.85  |
| [Q05209]PTN12_HUMAN Tyrosine-protein phosphatase non-receptor type 12 | 22 | Phosphoryl STY(11)   | EQISENPTEATDIGFGNR                   | 747 | 18 | 4 | 36.82 | b7b8b9y7                    | 2057.89 | 42.344  | 3883   | 2 | 1029.45 | 9.37   |
| [Q05209]PTN12_HUMAN Tyrosine-protein phosphatase non-receptor type 12 | 23 |                      | IADGVNEINT                           | 308 | 10 | 1 | 7.61  | y3                          | 1045.51 | 72.926  | 2184   | 1 | 1045.51 | -2.57  |
| [Q9Y281]COF2_HUMAN Cofilin-2                                          | 1  |                      | KEDLVFIFWAPESAPLK                    | 95  | 17 | 8 | 59.77 | b4b8b9y3y7y8y9y17           | 1990.05 | 98.097  | 172092 | 3 | 664.02  | -6.87  |
| [Q9Y281]COF2_HUMAN Cofilin-2                                          | 2  |                      | YALYDATYETK                          | 81  | 11 | 9 | 64.42 | b2b3b8y2y4y8y9y10y11        | 1337.63 | 53.023  | 158600 | 2 | 669.32  | 1.28   |
| [Q9Y281]COF2_HUMAN Cofilin-2                                          | 3  |                      | MASGVTVNDEVIK                        | 0   | 13 | 4 | 28.31 | b5b6b8y13                   | 1362.70 | 72.014  | 4951   | 1 | 1362.70 | 5.91   |
| [Q9Y281]COF2_HUMAN Cofilin-2                                          | 4  |                      | HEWQVNGLLDDIK                        | 132 | 12 | 3 | 22.48 | b7b9y3                      | 1453.69 | 39.877  | 141009 | 3 | 485.23  | -13.18 |
| [Q9Y281]COF2_HUMAN Cofilin-2                                          | 5  | Carbamidomethyl+C(5) | AVLFCLSDDK                           | 34  | 10 | 3 | 27.12 | b5y7y9                      | 1167.58 | 48.739  | 1613   | 2 | 584.29  | 2.93   |

|                                                   |    |                       |                                    |     |    |    |       |                                      |         |         |        |   |         |        |
|---------------------------------------------------|----|-----------------------|------------------------------------|-----|----|----|-------|--------------------------------------|---------|---------|--------|---|---------|--------|
| [Q8IZ40]RCOR2_HUMAN REST corepressor 2            | 1  |                       | VLFEQAFGFHGK                       | 140 | 12 | 4  | 34.53 | b8y7y10y11                           | 1379.69 | 80.794  | 4360   | 2 | 690.35  | -14.24 |
| [Q8IZ40]RCOR2_HUMAN REST corepressor 2            | 2  |                       | MPSVMEKPSAGSGILSR                  | 0   | 17 | 4  | 25.13 | b3*b3b4b15                           | 1746.88 | 97.267  | 3616   | 2 | 873.95  | -2.10  |
| [Q8IZ40]RCOR2_HUMAN REST corepressor 2            | 3  |                       | LGGR                               | 192 | 4  | 1  | 12.91 | y3                                   | 402.25  | 92.879  | 18809  | 1 | 402.25  | 1.90   |
| [Q8IZ40]RCOR2_HUMAN REST corepressor 2            | 4  |                       | GMYLSPEGLTAVSGSPDLANLTLR           | 261 | 24 | 4  | 12.82 | b8*b8b13y22                          | 2462.21 | 72.965  | 11066  | 2 | 1231.61 | -18.94 |
| [Q8IZ40]RCOR2_HUMAN REST corepressor 2            | 5  |                       | DFGAIAEVIGNK                       | 349 | 12 | 3  | 35.7  | y9y10y11                             | 1233.63 | 60.369  | 10026  | 2 | 617.32  | -15.73 |
| [Q8IZ40]RCOR2_HUMAN REST corepressor 2            | 6  | Carbamidomethyl+C(10) | GMLVWSPNHCVSDAK                    | 73  | 15 | 3  | 26.4  | b8b9b12                              | 1700.76 | 51.627  | 2808   | 2 | 850.88  | -16.87 |
| [Q8IZ40]RCOR2_HUMAN REST corepressor 2            | 7  |                       | SLADLANFTPPDEWTVEDK                | 120 | 20 | 11 | 59.25 | b7*b7*b7b10b11y4y6y8y11y12*y12       | 2295.08 | 105.215 | 2778   | 3 | 765.70  | -0.96  |
| [Q8IZ40]RCOR2_HUMAN REST corepressor 2            | 8  | Carbamidomethyl+C(13) | ELKGMLVWSPNHCVSDAK                 | 70  | 18 | 4  | 25.06 | b3b5b8y3                             | 2071.01 | 77.878  | 12106  | 3 | 691.01  | -1.06  |
| [Q8IZ40]RCOR2_HUMAN REST corepressor 2            | 9  |                       | HGYNIEQALGMLLWHKHDVEK              | 99  | 21 | 3  | 23.66 | y4y5y8                               | 2518.25 | 49.426  | 10425  | 4 | 630.32  | -7.66  |
| [Q8IZ40]RCOR2_HUMAN REST corepressor 2            | 10 |                       | FNLEEVLQEWAEQDGAPGAPVPMEEARR       | 376 | 29 | 4  | 14.67 | b5b13y11y28                          | 3297.53 | 91.720  | 9675   | 3 | 1099.85 | -6.37  |
| [Q8IZ40]RCOR2_HUMAN REST corepressor 2            | 11 |                       | PSVMEKPSAGSGILSRSR                 | 1   | 18 | 5  | 50.67 | b5b7b9b13b17                         | 1858.99 | 84.969  | 6249   | 2 | 930.00  | 7.03   |
| [Q8IZ40]RCOR2_HUMAN REST corepressor 2            | 12 |                       | MPSVMEKPSAGSGILSRSR                | 0   | 19 | 6  | 33.59 | b5*b5b9b12*b12b16                    | 1990.04 | 101.984 | 4393   | 2 | 995.53  | 11.65  |
| [Q8IZ40]RCOR2_HUMAN REST corepressor 2            | 13 | Phosphoryl STY(18)    | GAPLPAPALEEDDEVQITSVSTSVPR         | 405 | 26 | 5  | 25.75 | b15b16y9y11*y11                      | 2758.27 | 96.304  | 1912   | 2 | 1379.64 | -13.37 |
| [Q8IZ40]RCOR2_HUMAN REST corepressor 2            | 14 | Oxidation+M(4)        | PSVMEKPSAGSGILSR                   | 1   | 16 | 4  | 17.33 | b8b15*b15y3                          | 1631.84 | 69.683  | 4719   | 2 | 816.42  | -0.75  |
| [Q8IZ40]RCOR2_HUMAN REST corepressor 2            | 15 | Oxidation+M(24)       | FNLEEVLQEWAEQDGAPGAPVPMEEARR       | 376 | 29 | 13 | 68.04 | y5*y5y6*y6y8*y8y9*y9y12y15y16*y16y24 | 3313.51 | 91.623  | 3466   | 3 | 1105.18 | -9.50  |
| [P14618]KPYM_HUMAN Pyruvate kinase isozymes M1/M2 | 1  |                       | ITLDNAYMEK                         | 141 | 10 | 6  | 55.2  | y2y3y6y8y9y10                        | 1197.58 | 53.214  | 74938  | 2 | 599.29  | -0.92  |
| [P14618]KPYM_HUMAN Pyruvate kinase isozymes M1/M2 | 2  | Carbamidomethyl+C(6)  | NTGIICIGPASR                       | 43  | 13 | 5  | 34.35 | b4y5y9y11y13                         | 1359.71 | 54.081  | 49554  | 2 | 680.36  | 0.72   |
| [P14618]KPYM_HUMAN Pyruvate kinase isozymes M1/M2 | 3  | Carbamidomethyl+C(7)  | GIFPVLCKDPVQEAWAEDVDLR             | 467 | 22 | 8  | 43.93 | b2y2y5y6y8y9*y9y13                   | 2557.27 | 90.772  | 39515  | 3 | 853.10  | -1.24  |
| [P14618]KPYM_HUMAN Pyruvate kinase isozymes M1/M2 | 4  |                       | TATESFASDPILYRPVAVALDTK            | 92  | 23 | 6  | 13.16 | b4*b4b7y2y3y23                       | 2465.29 | 82.891  | 25183  | 3 | 822.43  | -1.19  |
| [P14618]KPYM_HUMAN Pyruvate kinase isozymes M1/M2 | 5  |                       | GSGTAEVELKK                        | 125 | 11 | 10 | 56.35 | b2*b2b3*b3y2y3y4y6y7y11              | 1118.60 | 26.831  | 15628  | 2 | 559.81  | -0.76  |
| [P14618]KPYM_HUMAN Pyruvate kinase isozymes M1/M2 | 6  |                       | SVETLK                             | 56  | 6  | 4  | 27.01 | b3*b3y3*y3                           | 676.39  | 38.913  | 100357 | 1 | 676.39  | -0.27  |
| [P14618]KPYM_HUMAN Pyruvate kinase isozymes M1/M2 | 7  |                       | GADFLVTEVENGGSLGSK                 | 188 | 18 | 5  | 33.07 | b6b9y3y12y13                         | 1779.88 | 74.164  | 52600  | 2 | 890.44  | 3.70   |
| [P14618]KPYM_HUMAN Pyruvate kinase isozymes M1/M2 | 8  | Carbamidomethyl+C(7)  | AGKPVICATQMLESMIK                  | 319 | 17 | 8  | 59.77 | b3b14b15b16y4y8y9*y9                 | 1876.96 | 88.836  | 47936  | 3 | 626.32  | -5.01  |
| [P14618]KPYM_HUMAN Pyruvate kinase isozymes M1/M2 | 9  | Carbamidomethyl+C(16) | AEGSDVANAVLDGADCIMLSGETAK          | 342 | 25 | 6  | 35.83 | y8*y8y10y12y13y15                    | 2494.14 | 71.192  | 16863  | 4 | 624.29  | -2.06  |
| [P14618]KPYM_HUMAN Pyruvate kinase isozymes M1/M2 | 10 |                       | DPVQEAWAEDVDLR                     | 475 | 14 | 7  | 40.18 | b8*b8b13y5y9y11*y11                  | 1642.77 | 62.916  | 15154  | 3 | 548.26  | -2.15  |
| [P14618]KPYM_HUMAN Pyruvate kinase isozymes M1/M2 | 11 |                       | GSGTAEVELK                         | 125 | 10 | 5  | 34.11 | b4b7*b7b8*b8                         | 990.50  | 54.507  | 5515   | 2 | 495.76  | -5.98  |
| [P14618]KPYM_HUMAN Pyruvate kinase isozymes M1/M2 | 12 |                       | EAEAAIYHLQLFEELR                   | 383 | 16 | 6  | 24.52 | b10*b10b12y12y14*y14                 | 1932.00 | 136.820 | 3464   | 1 | 1932.00 | 8.28   |
| [P14618]KPYM_HUMAN Pyruvate kinase isozymes M1/M2 | 13 |                       | TATESFASDPILYRPVAVALDTKGPPEIR      | 92  | 28 | 4  | 15.07 | b6b11y14y21                          | 3017.59 | 81.745  | 94980  | 4 | 755.15  | -2.10  |
| [P14618]KPYM_HUMAN Pyruvate kinase isozymes M1/M2 | 14 | Carbamidomethyl+C(16) | AEGSDVANAVLDGADCIMLSGETAKGDYPLEAVR | 342 | 34 | 11 | 92.47 | b5b6b9b10y3y13y14y15y16y24y25        | 3494.65 | 95.070  | 59116  | 3 | 1165.56 | 2.65   |

|                                                   |    |                                           |                                     |     |    |   |       |                      |         |         |       |   |         |        |
|---------------------------------------------------|----|-------------------------------------------|-------------------------------------|-----|----|---|-------|----------------------|---------|---------|-------|---|---------|--------|
| [P14618]KPYM_HUMAN Pyruvate kinase isozymes M1/M2 | 15 |                                           | RFDEILEASDGIMVAR                    | 278 | 16 | 7 | 38.22 | b3b8°b8b10b11°b11y13 | 1821.93 | 90.972  | 32181 | 3 | 607.98  | 6.57   |
| [P14618]KPYM_HUMAN Pyruvate kinase isozymes M1/M2 | 16 |                                           | GADFLVTEVENGGLGSKK                  | 188 | 19 | 3 | 22.87 | b6y9y10              | 1907.96 | 68.828  | 20479 | 3 | 636.66  | -5.44  |
| [P14618]KPYM_HUMAN Pyruvate kinase isozymes M1/M2 | 17 |                                           | KGVNLPGAAVDLPVSEK                   | 206 | 18 | 5 | 37.32 | b5y3y6y8y12          | 1764.98 | 63.938  | 15191 | 3 | 589.00  | -4.91  |
| [P14618]KPYM_HUMAN Pyruvate kinase isozymes M1/M2 | 18 | Carbamidomethyl+C(17)                     | LDIDSPITARNTGICTIGPASR              | 32  | 24 | 3 | 12.82 | b5b10y13             | 2538.33 | 80.661  | 5455  | 3 | 846.78  | -3.65  |
| [P14618]KPYM_HUMAN Pyruvate kinase isozymes M1/M2 | 19 | Carbamidomethyl+C(7)                      | GIFPVLCKDPVQEAEDVDLR                | 467 | 22 | 7 | 41.37 | b12y7°y7y8y10y11*y11 | 2557.25 | 124.420 | 5039  | 3 | 853.09  | -8.97  |
| [P14618]KPYM_HUMAN Pyruvate kinase isozymes M1/M2 | 20 |                                           | GATLKITLDNAYMEK                     | 136 | 15 | 4 | 26.4  | y5°y5y6y8            | 1667.85 | 90.873  | 2254  | 2 | 834.43  | -13.39 |
| [P14618]KPYM_HUMAN Pyruvate kinase isozymes M1/M2 | 21 | Carbamidomethyl+C(30)<br>;Oxidation+M(21) | SKPHSEAGTAFIQTQQLHAAMAD<br>TFLEHMCR | 1   | 31 | 4 | 11.31 | b13*b13y8y14         | 3529.63 | 83.045  | 10136 | 3 | 1177.21 | -3.87  |
| [P14618]KPYM_HUMAN Pyruvate kinase isozymes M1/M2 | 22 | Oxidation+M(12)                           | FDEILEASDGIMVAR                     | 279 | 15 | 3 | 18.32 | b6y3y11              | 1681.83 | 59.960  | 5303  | 3 | 561.28  | 12.77  |
| [P14618]KPYM_HUMAN Pyruvate kinase isozymes M1/M2 | 23 | Oxidation+M(8)                            | ITLDNAYMEK                          | 141 | 10 | 5 | 37.12 | b6b7b8°b8*b8         | 1213.58 | 62.124  | 3364  | 2 | 607.29  | 0.00   |
| [P14618]KPYM_HUMAN Pyruvate kinase isozymes M1/M2 | 24 |                                           | GSGTAEVELKK                         | 125 | 11 | 0 | 2.38  |                      | 1100.58 | 26.849  | 1715  | 3 | 367.53  | -8.32  |

Healty PLT LC-MS run 3: PLT\_sani\_290709\_03

| Protein name                    | Peptide Rank | Peptide Modification  | Peptide Sequence              | Peptide sequence start | Peptide sequence Length | Peptide Matched Products | Score  | By Matches                                                                                                                                                                                  | Precursor MH+ (Da) | Retention time (min) | Intensity | z | Precursor m/z | MH+ Error (ppm) |
|---------------------------------|--------------|-----------------------|-------------------------------|------------------------|-------------------------|--------------------------|--------|---------------------------------------------------------------------------------------------------------------------------------------------------------------------------------------------|--------------------|----------------------|-----------|---|---------------|-----------------|
| P37802 TAGL2_HUMAN Transgelin-2 | 1            | Carbamidomethyl+C(6)  | DGTVLCELINALYPEGQAPVKK        | 57                     | 22                      | 22                       | 153.94 | b3 <sup>b</sup> b3b4b5 <sup>b</sup> b5b6b11b13<br>b22y2y4y5y7y9y10y11y<br>13*y13y16y18y19y22                                                                                                | 2415.25            | 105.414              | 333704    | 3 | 805.75        | -5.26           |
| P37802 TAGL2_HUMAN Transgelin-2 | 2            |                       | YGINTTDIFQTVDLWEGK            | 102                    | 18                      | 31                       | 241.89 | b2b3b4b5 <sup>b</sup> b5b6b7b11 <sup>b</sup><br>11b12 <sup>b</sup> b12b13 <sup>b</sup> b13b15y<br>2y3 <sup>y</sup> y3y4y5y6y8y9 <sup>y</sup> y9 <sup>y</sup><br>9y10y12y13y14*y14y15<br>y18 | 2100.03            | 100.407              | 212384    | 2 | 1050.52       | 2.79            |
| P37802 TAGL2_HUMAN Transgelin-2 | 3            |                       | IQASTMAFK                     | 79                     | 9                       | 12                       | 73.35  | b3y1y2y3y5y6 <sup>y</sup> y6y7y8 <sup>y</sup><br>8*y8y9                                                                                                                                     | 996.52             | 45.456               | 182934    | 2 | 498.76        | -1.78           |
| P37802 TAGL2_HUMAN Transgelin-2 | 4            |                       | TLMNLGGLAVAR                  | 127                    | 12                      | 13                       | 88.77  | b2b3b4 <sup>b</sup> b4b6 <sup>b</sup> b6y2y6y7<br>y8y9y10y12                                                                                                                                | 1215.68            | 72.458               | 175198    | 2 | 608.35        | -2.31           |
| P37802 TAGL2_HUMAN Transgelin-2 | 5            |                       | DDGLFSGDPNWFPK                | 139                    | 14                      | 14                       | 89.56  | b2b3 <sup>b</sup> b3b4b5b6b8y2y6 <sup>*</sup><br>y6y9y10y12y14                                                                                                                              | 1594.73            | 86.808               | 147305    | 2 | 797.87        | 4.82            |
| P37802 TAGL2_HUMAN Transgelin-2 | 6            |                       | NFSDNQLQEGK                   | 160                    | 11                      | 16                       | 99.13  | b1b4 <sup>b</sup> b4b9y2y3 <sup>y</sup> y3y4 <sup>y</sup> y4<br>*y4y5y7y8y9*y9y11                                                                                                           | 1279.59            | 35.696               | 120390    | 2 | 640.30        | -0.10           |
| P37802 TAGL2_HUMAN Transgelin-2 | 7            |                       | QMEQISQFLQAAER                | 88                     | 14                      | 22                       | 173.3  | b3 <sup>b</sup> b3b4 <sup>b</sup> b4 <sup>b</sup> b4b5 <sup>b</sup> b5 <sup>b</sup><br>5b11b14y3y4y5*y5y6y7<br>y9y10y11y12y13y14                                                            | 1678.83            | 80.076               | 112247    | 2 | 839.92        | 3.56            |
| P37802 TAGL2_HUMAN Transgelin-2 | 8            | Carbamidomethyl+C(18) | QYDADLEQILQWITTQCR            | 20                     | 19                      | 15                       | 102.59 | b10 <sup>b</sup> b10y2y3 <sup>y</sup> y3y4y5y6<br>*y6y7y8 <sup>y</sup> y8y9y10y19                                                                                                           | 2394.16            | 115.562              | 51521     | 3 | 798.73        | -4.59           |
| P37802 TAGL2_HUMAN Transgelin-2 | 9            |                       | NVIGLQMG TNR                  | 171                    | 11                      | 6                        | 18.47  | b2y4*y4y8 <sup>y</sup> y8y11                                                                                                                                                                | 1202.63            | 54.270               | 21328     | 2 | 601.82        | 0.20            |
| P37802 TAGL2_HUMAN Transgelin-2 | 10           |                       | GASQAGMTGYGMPR                | 182                    | 14                      | 5                        | 37.86  | y7y9y12y13y14                                                                                                                                                                               | 1383.62            | 44.450               | 14871     | 2 | 692.31        | 3.35            |
| P37802 TAGL2_HUMAN Transgelin-2 | 11           | Carbamidomethyl+C(18) | QYDADLEQILQWITTQCRK           | 20                     | 20                      | 7                        | 37.02  | b4b9b10 <sup>b</sup> b10b11 <sup>b</sup> b11y2                                                                                                                                              | 2522.26            | 109.418              | 3147      | 3 | 841.43        | -2.52           |
| P37802 TAGL2_HUMAN Transgelin-2 | 12           |                       | DVGRPQP GRENFNWLK             | 40                     | 17                      | 4                        | 25.35  | b4y9y13y15                                                                                                                                                                                  | 2041.01            | 59.587               | 42783     | 4 | 511.01        | -13.64          |
| P37802 TAGL2_HUMAN Transgelin-2 | 13           | Carbamidomethyl+C(22) | YGINTTDIFQTVDLWEGKNMACV<br>QR | 102                    | 25                      | 4                        | 21.64  | b13b14 <sup>b</sup> b14y14                                                                                                                                                                  | 2959.40            | 76.195               | 12336     | 3 | 987.14        | -3.13           |
| P37802 TAGL2_HUMAN Transgelin-2 | 14           | Carbamidomethyl+C(21) | IEKQYDADLEQILQWITTQCR         | 17                     | 22                      | 5                        | 26.25  | b7 <sup>b</sup> b7b12y5y6                                                                                                                                                                   | 2764.39            | 109.398              | 2890      | 3 | 922.13        | -3.89           |
| P37802 TAGL2_HUMAN Transgelin-2 | 15           |                       | NFSDNQLQEGKNVIGLQMG TNR       | 160                    | 22                      | 4                        | 21.8   | b9 <sup>b</sup> b9b10y6                                                                                                                                                                     | 2463.18            | 48.781               | 2079      | 4 | 616.55        | -11.99          |
| P37802 TAGL2_HUMAN Transgelin-2 | 16           | Oxidation+M(2)        | QMEQISQFLQAAER                | 88                     | 14                      | 4                        | 18.69  | b10b13 <sup>b</sup> b13y9                                                                                                                                                                   | 1694.82            | 64.196               | 2314      | 2 | 847.91        | 2.09            |
| P37802 TAGL2_HUMAN Transgelin-2 | 17           |                       | PEGQAPVKK                     | 70                     | 9                       | 5                        | 36.48  | b3b4 <sup>b</sup> b4b5b8                                                                                                                                                                    | 953.54             | 105.420              | 8165      | 2 | 477.27        | -2.05           |
| P63261 ACTG_HUMAN Actin         | 1            |                       | SYELPDGQVITIGNER              | 238                    | 16                      | 27                       | 206.97 | b2b3 <sup>b</sup> b3b6b8b9 <sup>b</sup> b9b10b<br>12 <sup>b</sup> b12y3 <sup>y</sup> y3y4*y4y5y6<br>*y6y7y8y9y10y11 <sup>y</sup> y11y<br>12 <sup>y</sup> y12y13y16                          | 1790.90            | 70.748               | 2649301   | 2 | 895.95        | 2.39            |
| P63261 ACTG_HUMAN Actin         | 2            |                       | AGFAGDDAPR                    | 18                     | 10                      | 20                       | 141.51 | b1b2b3b4b5b8y1y2y3y4<br><sup>y</sup> y4y5 <sup>y</sup> y5y6 <sup>y</sup> y6y7 <sup>y</sup> y7y8y<br>9y10                                                                                    | 976.44             | 30.235               | 1748916   | 2 | 488.73        | -3.50           |

|                         |    |                      |                                     |     |    |    |        |                                                                                                                                 |         |        |         |   |         |        |
|-------------------------|----|----------------------|-------------------------------------|-----|----|----|--------|---------------------------------------------------------------------------------------------------------------------------------|---------|--------|---------|---|---------|--------|
| P63261 ACTG_HUMAN Actin | 3  |                      | TTGIVMDSGDGVHTHTVPIYEGYA<br>LPHAILR | 147 | 30 | 33 | 256.18 | b2°b2b3°b3b4°b4b7b14<br>b18b26y1y2y3y5y6y7y8<br>y9y10y11°y11y12y14y1<br>5y16y20y22y23y24y25y<br>26y28y30                        | 3183.59 | 79.587 | 1377326 | 4 | 796.65  | -6.13  |
| P63261 ACTG_HUMAN Actin | 4  |                      | EITALAPSTMK                         | 315 | 11 | 27 | 140.18 | b1b2°b2b3°b3b4°b4b5°<br>b5b6°b6b11y1y2y3°y3y<br>4°y4y5°y5y6°y6y7y8y9°<br>y9y11                                                  | 1161.62 | 50.233 | 1331932 | 2 | 581.31  | -0.32  |
| P63261 ACTG_HUMAN Actin | 5  |                      | AVFPSIVGRPR                         | 28  | 11 | 13 | 106.12 | b1b2y1y2y3y4y5y6y7y8<br>°y8y9y10                                                                                                | 1198.71 | 55.587 | 1143213 | 2 | 599.86  | 3.56   |
| P63261 ACTG_HUMAN Actin | 6  |                      | DSYVGDEAQSQR                        | 50  | 12 | 40 | 210.09 | b1°b1b2°b2b3°b3b4b5b<br>6b9b10b11y1y2y3°y3y4<br>°y4°y4y5°y5°y5y6°y6°y<br>6y7°y7°y7y8°y8°y8y9°y<br>9°y9y10°y10°y10y11y1<br>2°y12 | 1354.62 | 22.804 | 871441  | 2 | 677.81  | -2.79  |
| P63261 ACTG_HUMAN Actin | 7  |                      | GYSFTTTAER                          | 196 | 10 | 19 | 131.57 | b2b3°b3b4°b4b8b9y1y3<br>y4°y4y5y6°y6y7°y7y8°y<br>8y10                                                                           | 1132.52 | 42.199 | 869252  | 2 | 566.77  | -2.05  |
| P63261 ACTG_HUMAN Actin | 8  |                      | DLYANTVLSGGTTMYPGIADR               | 291 | 21 | 29 | 216.95 | b2b3°b3b4b6°b6b7°b7b<br>9°b9b14°b14b15°b15°b<br>15b18y2y4y5y6y7y8y9y<br>11y12y13y14y15y17                                       | 2215.08 | 76.812 | 641795  | 2 | 1108.04 | 2.98   |
| P63261 ACTG_HUMAN Actin | 9  | Carbamidomethyl-C(2) | LCYVALDFEQEMATAASSSLEK              | 215 | 23 | 30 | 186.67 | b2b3b4b6b7°b7b8b11b1<br>6°b16b23°b23y1y3y4y5<br>y6y7y9y10°y10y11°y11<br>y12y14y16y17°y17°y17<br>y23                             | 2550.19 | 91.992 | 423340  | 2 | 1275.60 | 5.94   |
| P63261 ACTG_HUMAN Actin | 10 |                      | QEYDESGPSIVHRK                      | 359 | 14 | 19 | 150.15 | b3°b3b4°b4b14y2y3y4y<br>5y6y7y8y9y10°y10y11y<br>12y14°y14                                                                       | 1644.79 | 31.141 | 419977  | 3 | 548.93  | -5.94  |
| P63261 ACTG_HUMAN Actin | 11 |                      | HQGVMMVGMGQK                        | 39  | 11 | 21 | 157.89 | b1b2°b2b3b4°b4b5b7b<br>10y3°y3y4°y4y5°y5y6y<br>7y9y10°y10y11                                                                    | 1171.58 | 32.471 | 377585  | 2 | 586.29  | 5.21   |
| P63261 ACTG_HUMAN Actin | 12 |                      | QEYDESGPSIVHR                       | 359 | 13 | 6  | 57.36  | y1y3y4y5y6y11                                                                                                                   | 1516.69 | 37.100 | 276634  | 3 | 506.24  | -5.63  |
| P63261 ACTG_HUMAN Actin | 13 |                      | KDLYANTVLSGGTTMYPGIADR              | 290 | 22 | 29 | 205.98 | b4b7°b7b8°b8b9b12b14<br>°b14b15°b15b16b22y1y<br>2y3y5y6y7y8y9y10y11y<br>12y13°y13y14°y14y22                                     | 2343.16 | 68.309 | 198456  | 3 | 781.73  | -0.63  |
| P63261 ACTG_HUMAN Actin | 14 |                      | LDLAGRDLTDYLMK                      | 177 | 14 | 10 | 57.72  | b2b11b12y1y2y3y4y5y1<br>0y14                                                                                                    | 1623.82 | 77.988 | 165841  | 3 | 541.94  | -14.66 |
| P63261 ACTG_HUMAN Actin | 15 |                      | IIAPPERK                            | 328 | 8  | 11 | 66     | b2y2y3°y3y4°y4y5y6°y6<br>y7y8                                                                                                   | 923.56  | 25.872 | 152293  | 2 | 462.28  | -9.19  |
| P63261 ACTG_HUMAN Actin | 16 |                      | IIAPPER                             | 328 | 7  | 9  | 52.63  | y1y3°y3y4y5°y5y6°y6y7                                                                                                           | 795.46  | 32.583 | 87502   | 2 | 398.24  | -10.51 |
| P63261 ACTG_HUMAN Actin | 17 | Carbamidomethyl-C(1) | CDVDIRK                             | 284 | 7  | 16 | 91.46  | b1b2°b2b3°b3b4°b4b6y<br>1y2y3y4°y4y5y6y7                                                                                        | 905.45  | 21.695 | 75530   | 2 | 453.23  | -5.93  |
| P63261 ACTG_HUMAN Actin | 18 |                      | HQGVMMVGMGQKDSYVGDEAQS<br>K         | 39  | 22 | 9  | 38.1   | b3b9b11b13°b13b14y1<br>2°y12y22                                                                                                 | 2351.06 | 58.380 | 18699   | 3 | 784.36  | -5.50  |

|                         |    |                                                                  |                                 |     |    |    |        |                                                                                          |         |         |         |   |         |        |
|-------------------------|----|------------------------------------------------------------------|---------------------------------|-----|----|----|--------|------------------------------------------------------------------------------------------|---------|---------|---------|---|---------|--------|
| P63261 ACTG_HUMAN Actin | 19 |                                                                  | YSVWIGGSILASLSTFQQMWISK         | 336 | 23 | 10 | 30.44  | b2b4b7b9y1y2y4y7y12y23                                                                   | 2602.34 | 136.475 | 9094    | 3 | 868.12  | 2.63   |
| P63261 ACTG_HUMAN Actin | 20 | Carbamidomethyl+C(16)                                            | EEEIAALVIDNGSGMCK               | 1   | 17 | 4  | 22.78  | b5b6°b6y3                                                                                | 1835.87 | 106.505 | 2092    | 2 | 918.44  | 11.90  |
| P63261 ACTG_HUMAN Actin | 21 |                                                                  | GILTLK                          | 62  | 6  | 9  | 78.08  | b3b4°b4b5°b5y3y4°y4y5                                                                    | 644.43  | 52.544  | 187795  | 1 | 644.43  | 0.28   |
| P63261 ACTG_HUMAN Actin | 22 | Carbamidomethyl+C(4)                                             | EKLCYVALDFEQEMATAASSSSLEK       | 213 | 25 | 4  | 12.09  | b11b21y14*y14                                                                            | 2807.31 | 72.507  | 22334   | 3 | 936.44  | 0.35   |
| P63261 ACTG_HUMAN Actin | 23 | Phosphoryl STY()                                                 | YSVWIGGSILASLSTFQQMWISK         | 336 | 23 | 5  | 19.48  | b12y7°y7y9y15                                                                            | 2682.28 | 96.804  | 4657    | 3 | 894.77  | -4.55  |
| P63261 ACTG_HUMAN Actin | 24 | Phosphoryl STY()                                                 | DLYANTVLSGGTTMYPGIADR           | 291 | 21 | 4  | 29.32  | b7b10b11b14_H3PO4<br>b14_HPO3 b14                                                        | 2295.00 | 43.562  | 4296    | 3 | 765.67  | -11.81 |
| P63261 ACTG_HUMAN Actin | 25 | Carbamidomethyl+C(17);<br>Oxidation+M(1)                         | MEEIEAALVIDNGSGMCK              | 0   | 18 | 3  | 15.09  | b17y11y17                                                                                | 1982.89 | 66.286  | 271540  | 3 | 661.63  | -0.25  |
| P63261 ACTG_HUMAN Actin | 26 | Carbamidomethyl+C(1);<br>Carbamidomethyl+C(16);<br>Oxidation+M() | CPEALFQPSFLGMESCGIHETTFS<br>IMK | 256 | 28 | 5  | 14.39  | b6b10y12y14*y14                                                                          | 3247.47 | 86.963  | 53990   | 3 | 1083.16 | 3.98   |
| P63261 ACTG_HUMAN Actin | 27 | Oxidation+M()                                                    | DLYANTVLSGGTTMYPGIADR           | 291 | 21 | 4  | 24.01  | b11y8y9y20                                                                               | 2231.06 | 77.454  | 2646    | 2 | 1116.03 | -3.17  |
| P63261 ACTG_HUMAN Actin | 28 | Carbamidomethyl+C(16);<br>Oxidation+M(15)                        | EEEIAALVIDNGSGMCK               | 1   | 17 | 5  | 49.54  | b4b5b6b7y5                                                                               | 1851.82 | 104.410 | 1965    | 2 | 926.41  | -14.83 |
| P63261 ACTG_HUMAN Actin | 29 |                                                                  | PSIVGRPR                        | 31  | 8  | 6  | 64.28  | b3°b3b4b5b6b7                                                                            | 881.53  | 55.550  | 583835  | 2 | 441.27  | -5.82  |
| P63261 ACTG_HUMAN Actin | 30 |                                                                  | VGDEAQSQR                       | 53  | 9  | 3  | 34.85  | b3b4b5                                                                                   | 989.50  | 22.802  | 102689  | 2 | 495.25  | 1.17   |
| P63261 ACTG_HUMAN Actin | 31 |                                                                  | VFPSIVGRPR                      | 29  | 10 | 1  | 7.74   | b4                                                                                       | 1127.67 | 55.552  | 81037   | 2 | 564.34  | -0.43  |
| P63261 ACTG_HUMAN Actin | 32 |                                                                  | GPSIVHRK                        | 365 | 8  | 2  | 7.27   | b3°b3                                                                                    | 893.53  | 31.159  | 65201   | 2 | 447.27  | -1.16  |
| P63261 ACTG_HUMAN Actin | 33 |                                                                  | GDEAQSQR                        | 54  | 8  | 2  | 21.12  | b3b4                                                                                     | 890.43  | 22.817  | 58643   | 2 | 445.72  | -5.96  |
| P63261 ACTG_HUMAN Actin | 34 |                                                                  | SGPSIVHRK                       | 364 | 9  | 2  | 7.27   | b3°b3                                                                                    | 980.56  | 31.154  | 51513   | 2 | 490.79  | 1.00   |
| P63261 ACTG_HUMAN Actin | 35 |                                                                  | PSIVHRK                         | 366 | 7  | 2  | 7.27   | b3°b3                                                                                    | 836.51  | 31.156  | 40809   | 2 | 418.76  | -4.52  |
| P63261 ACTG_HUMAN Actin | 36 |                                                                  | IAPPERK                         | 329 | 7  | 0  | 1.29   |                                                                                          | 810.48  | 25.865  | 40764   | 2 | 405.74  | -5.20  |
| P63261 ACTG_HUMAN Actin | 37 |                                                                  | GFAGDDAPR                       | 19  | 9  | 1  | 8.1    | b4                                                                                       | 905.42  | 30.232  | 22040   | 2 | 453.21  | 6.61   |
| P63261 ACTG_HUMAN Actin | 38 |                                                                  | TALAPSTMK                       | 317 | 9  | 0  | 2.58   |                                                                                          | 919.49  | 50.246  | 20539   | 1 | 919.49  | 3.05   |
| P63261 ACTG_HUMAN Actin | 39 |                                                                  | SIVGRPR                         | 32  | 7  | 3  | 30.62  | b3b5b6                                                                                   | 784.47  | 55.543  | 19746   | 2 | 392.74  | -9.57  |
| P63261 ACTG_HUMAN Actin | 40 |                                                                  | FAGDDAPR                        | 20  | 8  | 2  | 8.1    | b5°b5                                                                                    | 848.39  | 30.237  | 5922    | 1 | 848.39  | 4.46   |
| P63261 ACTG_HUMAN Actin | 41 |                                                                  | YDESGPSIVHRK                    | 361 | 12 | 0  | 3.87   |                                                                                          | 1387.70 | 31.183  | 3976    | 3 | 463.24  | 2.90   |
| P63261 ACTG_HUMAN Actin | 42 |                                                                  | DEAQSQR                         | 55  | 7  | 4  | 17.14  | b3°b3b5°b5                                                                               | 833.41  | 22.800  | 3564    | 2 | 417.21  | -2.42  |
| P63261 ACTG_HUMAN Actin | 43 |                                                                  | MVGMGQK                         | 43  | 7  | 0  | 2.58   |                                                                                          | 750.36  | 32.458  | 1761    | 2 | 375.68  | -5.45  |
| P63261 ACTG_HUMAN Actin | 44 |                                                                  | MYPGIADR                        | 304 | 8  | 0  | 7.32   |                                                                                          | 922.43  | 68.309  | 1541    | 1 | 922.43  | -11.45 |
| P63261 ACTG_HUMAN Actin | 45 |                                                                  | DSYVGDEAQSQR                    | 50  | 12 | 0  | 3.01   |                                                                                          | 1337.61 | 22.824  | 22328   | 3 | 446.54  | 9.58   |
| P60709 ACTB_HUMAN Actin | 1  |                                                                  | SYELPDGQVITIGNER                | 238 | 16 | 27 | 206.97 | b2b3°b3b6b8b9°b9b10b12°b12y3*y3y4*y4y5y6*y6y7y8y9y10y11°y11y12°y12y13y16                 | 1790.90 | 70.748  | 2649301 | 2 | 895.95  | 2.39   |
| P60709 ACTB_HUMAN Actin | 2  |                                                                  | AGFAGDDAPR                      | 18  | 10 | 20 | 141.51 | b1b2b3b4b5b8y1y2y3y4°y4y5°y5y6°y6y7°y7y8y9y10                                            | 976.44  | 30.235  | 1748916 | 2 | 488.73  | -3.50  |
| P60709 ACTB_HUMAN Actin | 3  |                                                                  | TTGIVMDSGDGVTHTVPIYEGYALPHAILR  | 147 | 30 | 33 | 256.18 | b2°b2b3°b3b4°b4b7b14b18b26y1y2y3y5y6y7y8y9y10y11°y11y12y14y15y16y20y22y23y24y25y26y28y30 | 3183.59 | 79.587  | 1377326 | 4 | 796.65  | -6.13  |
| P60709 ACTB_HUMAN Actin | 4  |                                                                  | EITALAPSTMK                     | 315 | 11 | 27 | 140.18 | b1b2°b2b3°b3b4°b4b5°b5b6°b6b11y1y2y3°y3y4°y4y5°y5y6°y6y7y8y9°y9y11                       | 1161.62 | 50.233  | 1331932 | 2 | 581.31  | -0.32  |



|                         |    |                                                |                                  |     |    |    |        |                                                                                                                                 |         |         |         |   |         |        |
|-------------------------|----|------------------------------------------------|----------------------------------|-----|----|----|--------|---------------------------------------------------------------------------------------------------------------------------------|---------|---------|---------|---|---------|--------|
| P60709 ACTB_HUMAN Actin | 5  |                                                | AVFPSIVGRPR                      | 28  | 11 | 13 | 106.12 | b1b2y1y2y3y4y5y6y7y8<br>y8y9y10                                                                                                 | 1198.71 | 55.587  | 1143213 | 2 | 599.86  | 3.56   |
| P60709 ACTB_HUMAN Actin | 6  |                                                | DSYVGDEAQSQR                     | 50  | 12 | 40 | 210.09 | b1°b1b2°b2b3°b3b4b5b<br>6b9b10b11y1y2y3°y3y4<br>°y4*y4y5°y5*y5y6°y6*y<br>6y7°y7*y7y8°y8*y8y9°y<br>9*y9y10°y10*y10y11y1<br>2*y12 | 1354.62 | 22.804  | 871441  | 2 | 677.81  | -2.79  |
| P60709 ACTB_HUMAN Actin | 7  |                                                | GYSFTTTER                        | 196 | 10 | 19 | 131.57 | b2b3°b3b4°b4b8b9y1y3<br>y4°y4y5y6°y6y7°y7y8°y<br>8y10                                                                           | 1132.52 | 42.199  | 869252  | 2 | 566.77  | -2.05  |
| P60709 ACTB_HUMAN Actin | 8  |                                                | DLYANTVLSGGTTMYPGIADR            | 291 | 21 | 29 | 216.95 | b2b3°b3b4b6°b6b7°b7b<br>9°b9b14°b14b15°b15°b<br>15b18y2y4y5y6y7y8y9y<br>11y12y13y14y15y17                                       | 2215.08 | 76.812  | 641795  | 2 | 1108.04 | 2.98   |
| P60709 ACTB_HUMAN Actin | 9  | Carbamidomethyl+C(2)                           | LCYVALDFEQEMATAASSSLEK           | 215 | 23 | 30 | 186.67 | b2b3b4b6b7°b7b8b11b1<br>6°b16b23°b23y1y3y4y5<br>y6y7y9y10°y10y11°y11<br>y12y14y16y17°y17*y17<br>y23                             | 2550.19 | 91.992  | 423340  | 2 | 1275.60 | 5.94   |
| P60709 ACTB_HUMAN Actin | 10 |                                                | QEYDESGPSIVHRK                   | 359 | 14 | 19 | 150.15 | b3°b3b4°b4b14y2y3y4y<br>5y6y7y8y9y10°y10y11y<br>12y14°y14                                                                       | 1644.79 | 31.141  | 419977  | 3 | 548.93  | -5.94  |
| P60709 ACTB_HUMAN Actin | 11 |                                                | HQGVMMVGMGQK                     | 39  | 11 | 21 | 157.89 | b1b2°b2b3b4°b4b5b7b<br>10y3°y3y4°y4y5°y5y6y<br>7y9y10°y10y11                                                                    | 1171.58 | 32.471  | 377585  | 2 | 586.29  | 5.21   |
| P60709 ACTB_HUMAN Actin | 12 |                                                | QEYDESGPSIVHR                    | 359 | 13 | 6  | 57.36  | y1y3y4y5y6y11                                                                                                                   | 1516.69 | 37.100  | 276634  | 3 | 506.24  | -5.63  |
| P60709 ACTB_HUMAN Actin | 13 |                                                | KDLYANTVLSGGTTMYPGIADR           | 290 | 22 | 29 | 205.98 | b4b7°b7b8°b8b9b12b14<br>°b14b15°b15b16b22y1y<br>2y3y5y6y7y8y9y10y11y<br>12y13°y13y14°y14y22                                     | 2343.16 | 68.309  | 198456  | 3 | 781.73  | -0.63  |
| P60709 ACTB_HUMAN Actin | 14 |                                                | LDLAGRDLTDYLMK                   | 177 | 14 | 10 | 57.72  | b2b11b12y1y2y3y4y5y1<br>0y14                                                                                                    | 1623.82 | 77.988  | 165841  | 3 | 541.94  | -14.66 |
| P60709 ACTB_HUMAN Actin | 15 |                                                | IIAPPERK                         | 328 | 8  | 11 | 66     | b2y2y3°y3y4°y4y5y6°y6<br>y7y8                                                                                                   | 923.56  | 25.872  | 152293  | 2 | 462.28  | -9.19  |
| P60709 ACTB_HUMAN Actin | 16 |                                                | IIAPPER                          | 328 | 7  | 9  | 52.63  | y1y3°y3y4y5°y5y6°y6y7                                                                                                           | 795.46  | 32.583  | 87502   | 2 | 398.24  | -10.51 |
| P60709 ACTB_HUMAN Actin | 17 | Carbamidomethyl+C(1)                           | CDVDIRK                          | 284 | 7  | 16 | 91.46  | b1b2°b2b3°b3b4°b4b6y<br>1y2y3y4°y4y5y6y7                                                                                        | 905.45  | 21.695  | 75530   | 2 | 453.23  | -5.93  |
| P60709 ACTB_HUMAN Actin | 18 |                                                | HQGVMMVGMGQKDSYVGDEAQS<br>K      | 39  | 22 | 9  | 38.1   | b3b9b11b13°b13b14y1<br>2°y12y22                                                                                                 | 2351.06 | 58.380  | 18699   | 3 | 784.36  | -5.50  |
| P60709 ACTB_HUMAN Actin | 19 |                                                | YSVWIGGSILASLSTFQQMWISK          | 336 | 23 | 10 | 30.44  | b2b4b7b9y1y2y4y7y12y<br>23                                                                                                      | 2602.34 | 136.475 | 9094    | 3 | 868.12  | 2.63   |
| P60709 ACTB_HUMAN Actin | 20 | Carbamidomethyl+C(1);<br>Carbamidomethyl+C(16) | CPEALFQPSFLGMESCGIHETTENS<br>IMK | 256 | 28 | 28 | 212.16 | b3b4b5b6°b6b7°b7b8°b<br>8b10b11°b11b12b13°b<br>13b15°b15y4y10y12y13<br>y14y15y17y18y21y23y2<br>4                                | 3231.47 | 92.059  | 1153569 | 3 | 1077.83 | 3.32   |
| P60709 ACTB_HUMAN Actin | 21 | Carbamidomethyl+C(1)                           | CDVDIR                           | 284 | 6  | 6  | 65.14  | b3°b3b4y3y4y5                                                                                                                   | 777.35  | 27.762  | 94934   | 2 | 389.18  | -9.81  |
| P60709 ACTB_HUMAN Actin | 22 |                                                | LDLAGR                           | 177 | 6  | 3  | 39.26  | y3y4y5                                                                                                                          | 644.38  | 32.825  | 76746   | 1 | 644.38  | 4.74   |

|                                             |    |                                                |                                    |     |    |    |        |                                                                                                                                 |         |        |         |   |         |        |
|---------------------------------------------|----|------------------------------------------------|------------------------------------|-----|----|----|--------|---------------------------------------------------------------------------------------------------------------------------------|---------|--------|---------|---|---------|--------|
| P60709 ACTB_HUMAN Actin                     | 23 | Carbamidomethyl+C(17)                          | MDDDIAALVVDNGSGMCK                 | 0   | 18 | 5  | 15.09  | b12*b12y5y12*y12                                                                                                                | 1910.82 | 81.360 | 4097    | 3 | 637.61  | -2.81  |
| P60709 ACTB_HUMAN Actin                     | 24 |                                                | YPIEHGIVTNWDDMEK                   | 68  | 16 | 5  | 16.61  | b6°b6b13*b13y3                                                                                                                  | 1946.93 | 36.941 | 2062    | 3 | 649.65  | 19.00  |
| P60709 ACTB_HUMAN Actin                     | 25 | Carbamidomethyl+C(16)                          | DDDIAALVVDNGSGMCK                  | 1   | 17 | 6  | 41.4   | b8b9b11b14y4y11                                                                                                                 | 1779.82 | 93.989 | 1907    | 2 | 890.41  | 17.97  |
| P60709 ACTB_HUMAN Actin                     | 26 | Carbamidomethyl+C(3);<br>Carbamidomethyl+C(18) | FRCPEALFQPSFLGMESCGIHETTF<br>NSIMK | 254 | 30 | 38 | 307.07 | b3b5b6b7b8b9°b9b12*b<br>12b13y3y4°y4y5y7*y7y<br>8*y8y9°y9*y9y10°y10y<br>11y12y13y14*y14y15y1<br>6y17y18y19y20y21*y21<br>y22*y22 | 3534.61 | 90.070 | 1119210 | 4 | 884.41  | -7.46  |
| P60709 ACTB_HUMAN Actin                     | 27 |                                                | DLYANTVLSGGTTMYPGIADRMQ<br>K       | 291 | 24 | 3  | 12.37  | b14y5y12                                                                                                                        | 2602.28 | 70.343 | 27214   | 4 | 651.33  | 7.41   |
| P60709 ACTB_HUMAN Actin                     | 28 | Carbamidomethyl+C(16)<br>;Phosphoryl STY(13)   | DDDIAALVVDNGSGMCK                  | 1   | 17 | 6  | 29.12  | b8°b8b12*b12y3y4                                                                                                                | 1859.73 | 81.398 | 732210  | 3 | 620.58  | -6.83  |
| P60709 ACTB_HUMAN Actin                     | 29 | Oxidation+M()                                  | HQGVMMVGMGQK                       | 39  | 11 | 4  | 23.63  | b3b8y9*y9                                                                                                                       | 1187.56 | 39.426 | 6307    | 2 | 594.29  | -2.47  |
| P60709 ACTB_HUMAN Actin                     | 30 | Oxidation+M()                                  | KDLYANTVLSGGTTMYPGIADR             | 290 | 22 | 7  | 28.01  | b5b6°b6b8y10y14°y14                                                                                                             | 2359.16 | 62.294 | 6258    | 3 | 787.06  | -0.83  |
| P60709 ACTB_HUMAN Actin                     | 31 | Carbamidomethyl+C(16)<br>;Oxidation+M(15)      | DDDIAALVVDNGSGMCK                  | 1   | 17 | 3  | 24.45  | b7b8b12                                                                                                                         | 1795.79 | 35.497 | 1765    | 2 | 898.40  | 4.49   |
| P60709 ACTB_HUMAN Actin                     | 32 |                                                | FPSIVGRPR                          | 30  | 9  | 4  | 30.62  | b3°b3b4b7                                                                                                                       | 1028.60 | 55.552 | 1375090 | 2 | 514.80  | -4.27  |
| P60709 ACTB_HUMAN Actin                     | 33 |                                                | YVGDEAQSQR                         | 52  | 10 | 3  | 17.14  | b4b8°b8                                                                                                                         | 1152.56 | 22.794 | 114653  | 2 | 576.78  | -1.59  |
| P60709 ACTB_HUMAN Actin                     | 34 |                                                | AGDDAPR                            | 21  | 7  | 3  | 36.21  | b3b4b5                                                                                                                          | 701.32  | 30.246 | 56709   | 1 | 701.32  | 3.57   |
| P60709 ACTB_HUMAN Actin                     | 35 |                                                | SFTTTAER                           | 198 | 8  | 2  | 8.1    | b3°b3                                                                                                                           | 912.45  | 42.232 | 17361   | 1 | 912.45  | 5.22   |
| P60709 ACTB_HUMAN Actin                     | 36 |                                                | LAPSTMK                            | 319 | 7  | 1  | 7.74   | b4                                                                                                                              | 747.41  | 50.275 | 15997   | 1 | 747.41  | 4.90   |
| P60709 ACTB_HUMAN Actin                     | 37 |                                                | SYVGDEAQSQR                        | 51  | 11 | 4  | 21.12  | b7°b7b8°b8                                                                                                                      | 1239.60 | 22.788 | 14456   | 2 | 620.30  | -1.08  |
| P60709 ACTB_HUMAN Actin                     | 38 |                                                | YDESGPSIVHR                        | 361 | 11 | 0  | 3.44   |                                                                                                                                 | 1259.61 | 37.093 | 2723    | 2 | 630.31  | 5.91   |
| P60709 ACTB_HUMAN Actin                     | 39 |                                                | YSFTTTAER                          | 197 | 9  | 1  | 8.1    | b3                                                                                                                              | 1075.51 | 42.229 | 1672    | 2 | 538.26  | -0.34  |
| P60709 ACTB_HUMAN Actin                     | 40 |                                                | EITALAPSTMK                        | 315 | 11 | 0  | 2.58   |                                                                                                                                 | 1143.61 | 50.244 | 68652   | 2 | 572.31  | 2.88   |
| P68871 HBB_HUMAN Hemoglobin<br>subunit beta | 1  |                                                | LLVVYPWTQR                         | 31  | 10 | 20 | 126.8  | b2b3b4b5y1y2*y2y3*y3<br>y4*y4y5*y5y6*y6y7*y7<br>y8y9y10                                                                         | 1274.72 | 78.095 | 1440083 | 2 | 637.87  | -0.77  |
| P68871 HBB_HUMAN Hemoglobin<br>subunit beta | 2  |                                                | VNVDEVGGEALGR                      | 18  | 13 | 35 | 207.51 | b2*b2b3*b3b4*b4b5°b5<br>*b5b6°b6*b6b9°b9b10*<br>b10b11*b11y2y3y4y6y7<br>°y7y8y9°y9y10°y10y11°<br>y11y12*y12y13*y13              | 1314.67 | 50.659 | 839319  | 2 | 657.84  | 1.67   |
| P68871 HBB_HUMAN Hemoglobin<br>subunit beta | 3  |                                                | VLGAFSDGLAHLNLIK                   | 67  | 16 | 12 | 80.08  | b3y1y3y4°y4y5y6°y6*y<br>6y9y10y14                                                                                               | 1669.87 | 75.993 | 823304  | 3 | 557.29  | -13.38 |
| P68871 HBB_HUMAN Hemoglobin<br>subunit beta | 4  |                                                | EFTPPVQAAYQK                       | 121 | 12 | 22 | 119.42 | b2°b2b3°b3b10*b10b11<br>b12y2*y2y3*y3y4y5y7y<br>8y9*y9y10°y10*y10y12                                                            | 1378.70 | 50.073 | 698869  | 2 | 689.86  | 3.19   |
| P68871 HBB_HUMAN Hemoglobin<br>subunit beta | 5  |                                                | FFESFGDLSTPDAVMGNPK                | 41  | 19 | 24 | 180.78 | b2b3b4°b4b7b8b10°b10<br>b14b17y2y4*y4y5y8y9y<br>10*y10y11y12y14y15y1<br>6y19                                                    | 2058.96 | 81.622 | 580657  | 2 | 1029.98 | 6.88   |
| P68871 HBB_HUMAN Hemoglobin<br>subunit beta | 6  | Carbamidomethyl+C(8)                           | LLGNVLCVLAHHFGK                    | 105 | 16 | 18 | 179.39 | b2b3b4b5°b5y2y3y4y5y<br>6y8y9y10y11y13y14y15<br>y16                                                                             | 1776.98 | 91.777 | 508506  | 3 | 593.00  | -10.30 |

|                                           |    |                                         |                                  |     |    |    |        |                                              |         |        |        |   |        |        |
|-------------------------------------------|----|-----------------------------------------|----------------------------------|-----|----|----|--------|----------------------------------------------|---------|--------|--------|---|--------|--------|
| IP68871 HBB_HUMAN Hemoglobin subunit beta | 7  |                                         | VVAGVANALAHK                     | 133 | 12 | 18 | 123.98 | b1b2b5y2y3y4y5y6*y6y7*y7y8y9*y9y10*y10y11y12 | 1149.67 | 41.753 | 392352 | 2 | 575.34 | -2.12  |
| IP68871 HBB_HUMAN Hemoglobin subunit beta | 8  |                                         | SAVTALW GK                       | 9   | 9  | 13 | 110.03 | b2*b2b3b5*b5b7y2y3y4y5y6y7y9                 | 932.51  | 60.720 | 371197 | 2 | 466.76 | -6.48  |
| IP68871 HBB_HUMAN Hemoglobin subunit beta | 9  | Carbamidomethyl+C(11)                   | GTFATLSELHCDK                    | 83  | 13 | 17 | 135.81 | b3*b3b4b11b12y1y2y3°y3y4y5y7y8y9°y9y11y13    | 1478.70 | 53.705 | 166560 | 2 | 739.85 | 1.57   |
| IP68871 HBB_HUMAN Hemoglobin subunit beta | 10 |                                         | LHVDPENFR                        | 96  | 9  | 16 | 134.15 | b2b3b4b6b8y2y3*y3y4°y4*y4y5y6y7y8y9          | 1126.56 | 46.791 | 110408 | 2 | 563.79 | 0.33   |
| IP68871 HBB_HUMAN Hemoglobin subunit beta | 11 |                                         | MVHLTPEEKSAVTALW GK              | 0   | 18 | 3  | 15.09  | b5y3y16                                      | 1997.08 | 71.248 | 867446 | 2 | 999.04 | 14.24  |
| IP68871 HBB_HUMAN Hemoglobin subunit beta | 12 | Carbamidomethyl+C(11)                   | GTFATLSELHCDKLHVDPENFR           | 83  | 22 | 13 | 105.39 | b4b11b12y3*y3y5y6y7y8y10y16y17y19            | 2586.21 | 67.211 | 424093 | 4 | 647.31 | -12.37 |
| IP68871 HBB_HUMAN Hemoglobin subunit beta | 13 | Carbamidomethyl+C(27)                   | VLGAFSDGLAHL DNLKGT FATLS ELHCDK | 67  | 29 | 4  | 24.33  | y4y6y8y13                                    | 3129.53 | 90.129 | 34083  | 4 | 783.14 | -13.03 |
| IP68871 HBB_HUMAN Hemoglobin subunit beta | 14 | Carbamidomethyl+C(11):Phosphoryl STY(2) | GTFATLSELHCDK                    | 83  | 13 | 4  | 31.41  | b3y6y7y11                                    | 1558.64 | 49.811 | 5718   | 2 | 779.82 | -10.26 |
| IP68871 HBB_HUMAN Hemoglobin subunit beta | 15 | Phosphoryl STY()                        | VLGAFSDGLAHL DNLK                | 67  | 16 | 7  | 50.51  | b4b9_H3PO4 b9_HPO3 b9b11b12*b12b15y11        | 1749.86 | 90.771 | 2973   | 4 | 438.22 | 6.35   |
| IP68871 HBB_HUMAN Hemoglobin subunit beta | 16 |                                         | AGVANALAHK                       | 135 | 10 | 10 | 93.61  | b3b4b5*b5b6*b6b7b8*b8b9                      | 951.53  | 41.745 | 228586 | 2 | 476.27 | -8.27  |
| IP68871 HBB_HUMAN Hemoglobin subunit beta | 17 |                                         | VAGVANALAHK                      | 134 | 11 | 1  | 7.5    | b3                                           | 1050.60 | 41.747 | 69587  | 2 | 525.80 | -4.88  |
| IP68871 HBB_HUMAN Hemoglobin subunit beta | 18 | Carbamidomethyl+C(2)                    | VCVLAH HFGK                      | 111 | 10 | 1  | 7.26   | b4                                           | 1167.60 | 91.792 | 59144  | 2 | 584.30 | -7.00  |
| IP68871 HBB_HUMAN Hemoglobin subunit beta | 19 |                                         | GAFSDGLAHL DNLK                  | 69  | 14 | 2  | 14.09  | b11b13                                       | 1457.74 | 76.019 | 44305  | 2 | 729.38 | 3.43   |
| IP68871 HBB_HUMAN Hemoglobin subunit beta | 20 |                                         | VTALW GK                         | 11  | 7  | 5  | 37.54  | b3*b3b4b5*b5                                 | 774.45  | 60.713 | 37341  | 1 | 774.45 | 2.92   |
| IP68871 HBB_HUMAN Hemoglobin subunit beta | 21 | Carbamidomethyl+C(1)                    | CVLAH HFGK                       | 112 | 9  | 3  | 24.32  | b3b5b8                                       | 1068.54 | 91.775 | 30685  | 2 | 534.77 | -3.54  |
| IP68871 HBB_HUMAN Hemoglobin subunit beta | 22 | Carbamidomethyl+C(6)                    | GNVLVCVLAH HFGK                  | 107 | 14 | 2  | 14.09  | b3b11                                        | 1550.81 | 91.773 | 28483  | 3 | 517.61 | -8.89  |
| IP68871 HBB_HUMAN Hemoglobin subunit beta | 23 |                                         | GVANALAHK                        | 136 | 9  | 7  | 59.94  | b3b4b5*b5b7b8*b8                             | 880.49  | 41.755 | 23577  | 2 | 440.75 | -13.24 |
| IP68871 HBB_HUMAN Hemoglobin subunit beta | 24 |                                         | ANALAHK                          | 138 | 7  | 4  | 34.85  | b3b4*b4b5                                    | 724.41  | 41.719 | 11430  | 1 | 724.41 | 6.57   |
| IP68871 HBB_HUMAN Hemoglobin subunit beta | 25 | Carbamidomethyl+C(8)                    | ATLSELHCDK                       | 86  | 10 | 2  | 7.35   | b6°b6                                        | 1173.54 | 53.647 | 11187  | 2 | 587.27 | -13.00 |
| IP68871 HBB_HUMAN Hemoglobin subunit beta | 26 | Carbamidomethyl+C(7)                    | LGNVLVCVLAH HFGK                 | 106 | 15 | 0  | 4.73   |                                              | 1663.89 | 91.769 | 10933  | 3 | 555.30 | -11.74 |
| IP68871 HBB_HUMAN Hemoglobin subunit beta | 27 | Carbamidomethyl+C(9)                    | FATLSELHCDK                      | 85  | 11 | 4  | 29.26  | b3°b3b5b8                                    | 1320.62 | 53.699 | 9483   | 3 | 440.88 | -6.10  |
| IP68871 HBB_HUMAN Hemoglobin subunit beta | 28 | Carbamidomethyl+C(3)                    | LVCVLAH HFGK                     | 110 | 11 | 2  | 20.62  | b3b4                                         | 1280.69 | 91.752 | 8548   | 2 | 640.85 | -3.34  |
| IP68871 HBB_HUMAN Hemoglobin subunit beta | 29 |                                         | LAH HFGK                         | 114 | 7  | 2  | 20.62  | b5b6                                         | 809.44  | 91.793 | 1970   | 2 | 405.22 | 0.08   |
| IP68871 HBB_HUMAN Hemoglobin subunit beta | 30 |                                         | EFTPPVQAAYQK                     | 121 | 12 | 0  | 3.01   |                                              | 1360.69 | 50.032 | 7541   | 2 | 680.85 | 5.20   |
| IP68871 HBB_HUMAN Hemoglobin subunit beta | 31 |                                         | LHVDPENFR                        | 96  | 9  | 0  | 1.72   |                                              | 1109.53 | 46.786 | 4191   | 3 | 370.51 | -6.71  |
| IP07737 PROF1_HUMAN Profilin-1            | 1  |                                         | STGGAPTFNVTVTK                   | 91  | 14 | 11 | 44.11  | b1b2°b2b5°b5b7b10°b10y1y9y10                 | 1379.72 | 51.690 | 339748 | 2 | 690.36 | 1.24   |

|                                           |    |                                          |                                       |     |    |    |        |                                                                                                                                 |         |         |         |   |         |        |
|-------------------------------------------|----|------------------------------------------|---------------------------------------|-----|----|----|--------|---------------------------------------------------------------------------------------------------------------------------------|---------|---------|---------|---|---------|--------|
| P07737 PROF1_HUMAN Profilin-1             | 2  |                                          | SSFYVNGLTGGQK                         | 56  | 14 | 17 | 164.34 | b3 <b>°</b> b3b4b5 <b>°</b> b5b6y3y4*y4y5y6y7y8y9y10y11y14                                                                      | 1470.76 | 67.056  | 318522  | 2 | 735.88  | -2.16  |
| P07737 PROF1_HUMAN Profilin-1             | 3  |                                          | TFVNITPAEVLVVGKDR                     | 38  | 18 | 17 | 73.67  | b2 <b>°</b> b2b3 <b>°</b> b3b10 <b>°</b> b10*b10b13y1y2y5y6y8y13y15y16y18                                                       | 1915.05 | 79.538  | 275615  | 3 | 639.02  | -8.54  |
| P07737 PROF1_HUMAN Profilin-1             | 4  |                                          | TFVNITPAEVLVVGK                       | 38  | 16 | 27 | 179.33 | b1b2 <b>°</b> b2b3b4*b4b5*b5b6 <b>°</b> b6*b6b13*b13b14*b14y1y2y3y4y6y7y10y11y12y13y14y16                                       | 1643.93 | 85.367  | 273082  | 2 | 822.47  | -1.26  |
| P07737 PROF1_HUMAN Profilin-1             | 5  |                                          | TLVLLMGK                              | 108 | 8  | 9  | 75.93  | b2b3b4y2y3y4y5y6y8                                                                                                              | 874.53  | 68.625  | 192311  | 2 | 437.77  | -14.59 |
| P07737 PROF1_HUMAN Profilin-1             | 6  |                                          | DSPSVWAAVPGK                          | 26  | 12 | 9  | 62.09  | b2b8b9y1y3y4y7y10y12                                                                                                            | 1213.62 | 58.548  | 125437  | 2 | 607.31  | -0.10  |
| P07737 PROF1_HUMAN Profilin-1             | 7  |                                          | EGVHGGLINK                            | 116 | 10 | 5  | 40.98  | b1b3b5b7y10                                                                                                                     | 1023.55 | 28.648  | 2850    | 2 | 512.28  | -10.61 |
| P07737 PROF1_HUMAN Profilin-1             | 8  | Carbamidomethyl+C(16)                    | AGWNAYIDNLMADGTCQDAAIVGYK             | 1   | 25 | 4  | 18.25  | b17y3y11y14                                                                                                                     | 2717.24 | 95.516  | 3850    | 2 | 1359.12 | 1.35   |
| P07737 PROF1_HUMAN Profilin-1             | 9  | Carbamidomethyl+C(1)                     | CYEMASHLRR                            | 127 | 10 | 3  | 26.21  | b5b9y8                                                                                                                          | 1322.60 | 43.564  | 13813   | 3 | 441.54  | -7.94  |
| P07737 PROF1_HUMAN Profilin-1             | 10 |                                          | EGVHGGLINKK                           | 116 | 11 | 4  | 23.63  | b5y4y7*y7                                                                                                                       | 1151.64 | 29.455  | 6319    | 3 | 384.55  | -12.51 |
| P07737 PROF1_HUMAN Profilin-1             | 11 | Carbamidomethyl+C(16);Phosphoryl.STY(29) | AGWNAYIDNLMADGTCQDAAIVGYKDSPSVWAAVPGK | 1   | 37 | 4  | 14.4   | b4y3y7y9                                                                                                                        | 3991.78 | 104.588 | 239281  | 4 | 998.70  | -3.12  |
| P07737 PROF1_HUMAN Profilin-1             | 12 |                                          | VHGGLINK                              | 118 | 8  | 0  | 2.15   |                                                                                                                                 | 837.49  | 28.674  | 2895    | 2 | 419.25  | -3.28  |
| P07737 PROF1_HUMAN Profilin-1             | 13 |                                          | TLVLLMGK                              | 108 | 8  | 0  | 1.29   |                                                                                                                                 | 856.53  | 68.619  | 1633    | 2 | 428.77  | -1.57  |
| P02775 CXCL7_HUMAN Platelet basic protein | 1  |                                          | NIQSLEVIGK                            | 75  | 10 | 13 | 85.76  | b2b3*b3y2y3y4y5y6y7y8*y8*y8y10                                                                                                  | 1100.63 | 56.326  | 881777  | 2 | 550.82  | -3.11  |
| P02775 CXCL7_HUMAN Platelet basic protein | 2  |                                          | GKEESLSDLYAELR                        | 47  | 15 | 32 | 263.15 | b2b3 <b>°</b> b3b4 <b>°</b> b4b6 <b>°</b> b6b7b9 <b>°</b> b9b10 <b>°</b> b10b11b12b14y1y2y3*y3y4*y4y5y6y7*y7y8y9y10y11y12y13y15 | 1724.84 | 64.178  | 806279  | 2 | 862.92  | 4.03   |
| P02775 CXCL7_HUMAN Platelet basic protein | 3  | Carbamidomethyl+C(2)                     | ICLDPDAPR                             | 103 | 9  | 12 | 73.35  | b2b4 <b>°</b> b4y1y2y3y5*y5y6y7y8y9                                                                                             | 1056.51 | 46.498  | 776504  | 2 | 528.76  | -1.62  |
| P02775 CXCL7_HUMAN Platelet basic protein | 4  | Carbamidomethyl+C(4)                     | GTHCNQVEVIATLK                        | 85  | 14 | 15 | 137.6  | b3b4b6b9b10b12y1y2y3y4y5y7y10y11y14                                                                                             | 1569.79 | 51.049  | 234923  | 3 | 523.93  | -12.60 |
| P02775 CXCL7_HUMAN Platelet basic protein | 5  |                                          | EESLSDLYAELR                          | 49  | 13 | 6  | 57.36  | y4y5y6y8y9y13                                                                                                                   | 1539.74 | 70.538  | 62626   | 2 | 770.37  | 14.19  |
| P02775 CXCL7_HUMAN Platelet basic protein | 6  |                                          | GKEESLSDLYAELR                        | 47  | 15 | 3  | 17.57  | b10b14y13                                                                                                                       | 1724.84 | 91.983  | 1298465 | 2 | 862.92  | 1.63   |
| P02775 CXCL7_HUMAN Platelet basic protein | 7  | Carbamidomethyl+C(3)                     | KICLDPDAPR                            | 102 | 10 | 10 | 84.97  | b5 <b>°</b> b5b7b8 <b>°</b> b8y3y5*y5y7y8                                                                                       | 1184.61 | 41.004  | 140412  | 2 | 592.81  | 0.62   |
| P02775 CXCL7_HUMAN Platelet basic protein | 8  |                                          | LDPDAPR                               | 105 | 7  | 1  | 8.64   | b3                                                                                                                              | 783.40  | 46.481  | 11778   | 1 | 783.40  | 0.08   |
| P62736 ACTA_HUMAN Actin                   | 1  |                                          | SYELPDGQVITIGNER                      | 240 | 16 | 27 | 206.97 | b2b3 <b>°</b> b3b6b8b9 <b>°</b> b9b10b12 <b>°</b> b12y3*y3y4*y4y5y6*y6y7y8y9y10y11*y11y12*y12y13y16                             | 1790.90 | 70.748  | 2649301 | 2 | 895.95  | 2.39   |

|                         |    |                      |                                   |     |    |    |        |                                                                                                             |         |         |         |   |         |        |
|-------------------------|----|----------------------|-----------------------------------|-----|----|----|--------|-------------------------------------------------------------------------------------------------------------|---------|---------|---------|---|---------|--------|
| P62736 ACTA_HUMAN Actin | 2  |                      | YPIEHGIITNWDDMEK                  | 70  | 16 | 26 | 224.68 | b2b3b8b9b11*b11b12b14b15y1y3y4y5y6y7y8*y8y9y12*y12y13y14y15*y15y16*y16                                      | 1960.89 | 66.284  | 1926028 | 3 | 654.30  | -8.16  |
| P62736 ACTA_HUMAN Actin | 3  |                      | AGFAGDDAPR                        | 20  | 10 | 20 | 141.51 | b1b2b3b4b5b8y1y2y3y4°y4y5°y5y6°y6y7°y7y8y9y10                                                               | 976.44  | 30.235  | 1748916 | 2 | 488.73  | -3.50  |
| P62736 ACTA_HUMAN Actin | 4  |                      | EITALAPSTMK                       | 317 | 11 | 27 | 140.18 | b1b2°b2b3°b3b4°b4b5°b5b6°b6b11y1y2y3°y3y4°y4y5°y5y6°y6y7y8y9°y9y11                                          | 1161.62 | 50.233  | 1331932 | 2 | 581.31  | -0.32  |
| P62736 ACTA_HUMAN Actin | 5  |                      | AVFPSIVGRPR                       | 30  | 11 | 13 | 106.12 | b1b2y1y2y3y4y5y6y7y8°y8y9y10                                                                                | 1198.71 | 55.587  | 1143213 | 2 | 599.86  | 3.56   |
| P62736 ACTA_HUMAN Actin | 6  |                      | DSYVGDEAQSQR                      | 52  | 12 | 40 | 210.09 | b1°b1b2°b2b3°b3b4b5b6b9b10b11y1y2y3°y3y4°y4°y4y5°y5°y5y6°y6°y6y7°y7°y7y8°y8°y8y9°y9°y9y10°y10°y10y11y12°y12 | 1354.62 | 22.804  | 871441  | 2 | 677.81  | -2.79  |
| P62736 ACTA_HUMAN Actin | 7  |                      | HQGVVMVGMGQK                      | 41  | 11 | 21 | 157.89 | b1b2°b2b3b4°b4b5b7b10y3°y3y4°y4y5°y5y6y7y9y10°y10y11                                                        | 1171.58 | 32.471  | 377585  | 2 | 586.29  | 5.21   |
| P62736 ACTA_HUMAN Actin | 8  |                      | LDLAGRDLTDYLMK                    | 179 | 14 | 10 | 57.72  | b2b11b12y1y2y3y4y5y10y14                                                                                    | 1623.82 | 77.988  | 165841  | 3 | 541.94  | -14.66 |
| P62736 ACTA_HUMAN Actin | 9  |                      | IIAPPERK                          | 330 | 8  | 11 | 66     | b2y2y3°y3y4°y4y5y6°y6y7y8                                                                                   | 923.56  | 25.872  | 152293  | 2 | 462.28  | -9.19  |
| P62736 ACTA_HUMAN Actin | 10 |                      | IIAPPER                           | 330 | 7  | 9  | 52.63  | y1y3°y3y4y5°y5y6°y6y7                                                                                       | 795.46  | 32.583  | 87502   | 2 | 398.24  | -10.51 |
| P62736 ACTA_HUMAN Actin | 11 |                      | HQGVVMVGMGQKDSYVGDEAQS<br>K       | 41  | 22 | 9  | 38.1   | b3b9b11b13°b13b14y12°y12y22                                                                                 | 2351.06 | 58.380  | 18699   | 3 | 784.36  | -5.50  |
| P62736 ACTA_HUMAN Actin | 12 |                      | YSVWIGGSILASLSTFQQMWISK           | 338 | 23 | 10 | 30.44  | b2b4b7b9y1y2y4y7y12y23                                                                                      | 2602.34 | 136.475 | 9094    | 3 | 868.12  | 2.63   |
| P62736 ACTA_HUMAN Actin | 13 | Carbamidomethyl+C(1) | CPETLFPQPSFIGMESAGIHETTYNS<br>IMK | 258 | 28 | 10 | 61.86  | b5b7b8b9b10y4y5y9°y9y28                                                                                     | 3188.52 | 126.215 | 3332    | 3 | 1063.51 | 14.62  |
| P62736 ACTA_HUMAN Actin | 14 |                      | DLYANNVLSGGTTMYPGIADR             | 293 | 21 | 4  | 36.72  | y7y12y13y14                                                                                                 | 2228.06 | 107.762 | 2403    | 3 | 743.36  | -2.74  |
| P62736 ACTA_HUMAN Actin | 15 |                      | KDLYANNVLSGGTTMYPGIADR            | 292 | 22 | 3  | 21.8   | b12y5y6                                                                                                     | 2356.13 | 88.578  | 2307    | 2 | 1178.57 | -11.50 |
| P62736 ACTA_HUMAN Actin | 16 |                      | AGFAGDDAPR                        | 20  | 10 | 0  | 2.15   |                                                                                                             | 958.43  | 30.227  | 15126   | 2 | 479.72  | -5.22  |
| P68032 ACTC_HUMAN Actin | 1  |                      | SYELPDGQVITIGNER                  | 240 | 16 | 27 | 206.97 | b2b3°b3b6b8b9°b9b10b12°b12y3°y3y4°y4y5y6°y6y7y8y9y10y11°y11y12°y12y13y16                                    | 1790.90 | 70.748  | 2649301 | 2 | 895.95  | 2.39   |
| P68032 ACTC_HUMAN Actin | 2  |                      | YPIEHGIITNWDDMEK                  | 70  | 16 | 26 | 224.68 | b2b3b8b9b11*b11b12b14b15y1y3y4y5y6y7y8*y8y9y12*y12y13y14y15*y15y16*y16                                      | 1960.89 | 66.284  | 1926028 | 3 | 654.30  | -8.16  |
| P68032 ACTC_HUMAN Actin | 3  |                      | AGFAGDDAPR                        | 20  | 10 | 20 | 141.51 | b1b2b3b4b5b8y1y2y3y4°y4y5°y5y6°y6y7°y7y8y9y10                                                               | 976.44  | 30.235  | 1748916 | 2 | 488.73  | -3.50  |
| P68032 ACTC_HUMAN Actin | 4  |                      | EITALAPSTMK                       | 317 | 11 | 27 | 140.18 | b1b2°b2b3°b3b4°b4b5°b5b6°b6b11y1y2y3°y3y4°y4y5°y5y6°y6y7y8y9°y9y11                                          | 1161.62 | 50.233  | 1331932 | 2 | 581.31  | -0.32  |

|                         |    |                      |                                  |     |    |    |        |                                                                                                                                 |         |         |         |   |         |        |
|-------------------------|----|----------------------|----------------------------------|-----|----|----|--------|---------------------------------------------------------------------------------------------------------------------------------|---------|---------|---------|---|---------|--------|
| P68032 ACTC_HUMAN Actin | 5  |                      | AVFPSIVGRPR                      | 30  | 11 | 13 | 106.12 | b1b2y1y2y3y4y5y6y7y8<br>y8y9y10                                                                                                 | 1198.71 | 55.587  | 1143213 | 2 | 599.86  | 3.56   |
| P68032 ACTC_HUMAN Actin | 6  |                      | DSYVGDEAQSQR                     | 52  | 12 | 40 | 210.09 | b1°b1b2°b2b3°b3b4b5b<br>6b9b10b11y1y2y3°y3y4<br>°y4*y4y5°y5*y5y6°y6*y<br>6y7°y7*y7y8°y8*y8y9°y<br>9*y9y10°y10*y10y11y1<br>2*y12 | 1354.62 | 22.804  | 871441  | 2 | 677.81  | -2.79  |
| P68032 ACTC_HUMAN Actin | 7  |                      | HQGVMVGMGQK                      | 41  | 11 | 21 | 157.89 | b1b2*b2b3b4*b4b5b7b<br>10y3*y3y4*y4y5*y5y6y<br>7y9y10*y10y11                                                                    | 1171.58 | 32.471  | 377585  | 2 | 586.29  | 5.21   |
| P68032 ACTC_HUMAN Actin | 8  |                      | LDLAGRDLTDYLMK                   | 179 | 14 | 10 | 57.72  | b2b11b12y1y2y3y4y5y1<br>0y14                                                                                                    | 1623.82 | 77.988  | 165841  | 3 | 541.94  | -14.66 |
| P68032 ACTC_HUMAN Actin | 9  |                      | IIAPPERK                         | 330 | 8  | 11 | 66     | b2y2y3°y3y4°y4y5y6°y6<br>y7y8                                                                                                   | 923.56  | 25.872  | 152293  | 2 | 462.28  | -9.19  |
| P68032 ACTC_HUMAN Actin | 10 |                      | IIAPPER                          | 330 | 7  | 9  | 52.63  | y1y3°y3y4y5°y5y6°y6y7                                                                                                           | 795.46  | 32.583  | 87502   | 2 | 398.24  | -10.51 |
| P68032 ACTC_HUMAN Actin | 11 |                      | HQGVMVGMGQKDSYVGDEAQS<br>K       | 41  | 22 | 9  | 38.1   | b3b9b11b13*b13b14y1<br>2*y12y22                                                                                                 | 2351.06 | 58.380  | 18699   | 3 | 784.36  | -5.50  |
| P68032 ACTC_HUMAN Actin | 12 |                      | YSVWIGGSILASLSTFQQMWISK          | 338 | 23 | 10 | 30.44  | b2b4b7b9y1y2y4y7y12y<br>23                                                                                                      | 2602.34 | 136.475 | 9094    | 3 | 868.12  | 2.63   |
| P68032 ACTC_HUMAN Actin | 13 | Carbamidomethyl+C(1) | CPETLFQPSFIGMESAGIHETTYNS<br>IMK | 258 | 28 | 10 | 61.86  | b5b7b8b9b10y4y5y9*y9<br>y28                                                                                                     | 3188.52 | 126.215 | 3332    | 3 | 1063.51 | 14.62  |
| P68032 ACTC_HUMAN Actin | 14 |                      | DLYANNVLSGGTTMYPGIADR            | 293 | 21 | 4  | 36.72  | y7y12y13y14                                                                                                                     | 2228.06 | 107.762 | 2403    | 3 | 743.36  | -2.74  |
| P68032 ACTC_HUMAN Actin | 15 |                      | KDLYANNVLSGGTTMYPGIADR           | 292 | 22 | 3  | 21.8   | b12y5y6                                                                                                                         | 2356.13 | 88.578  | 2307    | 2 | 1178.57 | -11.50 |
| P68032 ACTC_HUMAN Actin | 16 | Oxidation+M()        | EITALAPSTMK                      | 317 | 11 | 4  | 35.78  | b4y5y6y9                                                                                                                        | 1177.62 | 40.980  | 28864   | 2 | 589.31  | 1.87   |
| P63267 ACTH_HUMAN Actin | 1  |                      | SYELPDGQVITIGNER                 | 239 | 16 | 27 | 206.97 | b2b3°b3b6b8b9°b9b10b<br>12°b12y3°y3y4°y4y5y6<br>*y6y7y8y9y10y11°y11y<br>12°y12y13y16                                            | 1790.90 | 70.748  | 2649301 | 2 | 895.95  | 2.39   |
| P63267 ACTH_HUMAN Actin | 2  |                      | YPIEHGITNWDDMEK                  | 69  | 16 | 26 | 224.68 | b2b3b8b9b11*b11b12b<br>14b15y1y3y4y5y6y7y8*<br>y8y9y12*y12y13y14y15<br>*y15y16*y16                                              | 1960.89 | 66.284  | 1926028 | 3 | 654.30  | -8.16  |
| P63267 ACTH_HUMAN Actin | 3  |                      | AGFAGDDAPR                       | 19  | 10 | 20 | 141.51 | b1b2b3b4b5b8y1y2y3y4<br>°y4y5°y5y6°y6y7°y7y8y<br>9y10                                                                           | 976.44  | 30.235  | 1748916 | 2 | 488.73  | -3.50  |
| P63267 ACTH_HUMAN Actin | 4  |                      | EITALAPSTMK                      | 316 | 11 | 27 | 140.18 | b1b2°b2b3°b3b4°b4b5°<br>b5b6°b6b11y1y2y3°y3y<br>4°y4y5°y5y6°y6y7y8y9°<br>y9y11                                                  | 1161.62 | 50.233  | 1331932 | 2 | 581.31  | -0.32  |
| P63267 ACTH_HUMAN Actin | 5  |                      | AVFPSIVGRPR                      | 29  | 11 | 13 | 106.12 | b1b2y1y2y3y4y5y6y7y8<br>y8y9y10                                                                                                 | 1198.71 | 55.587  | 1143213 | 2 | 599.86  | 3.56   |
| P63267 ACTH_HUMAN Actin | 6  |                      | DSYVGDEAQSQR                     | 51  | 12 | 40 | 210.09 | b1°b1b2°b2b3°b3b4b5b<br>6b9b10b11y1y2y3°y3y4<br>°y4*y4y5°y5*y5y6°y6*y<br>6y7°y7*y7y8°y8*y8y9°y<br>9*y9y10°y10*y10y11y1<br>2*y12 | 1354.62 | 22.804  | 871441  | 2 | 677.81  | -2.79  |

|                         |    |                                           |                                   |     |    |    |        |                                                                                                             |         |         |         |   |         |        |
|-------------------------|----|-------------------------------------------|-----------------------------------|-----|----|----|--------|-------------------------------------------------------------------------------------------------------------|---------|---------|---------|---|---------|--------|
| P63267 ACTH_HUMAN Actin | 7  |                                           | HQGVMVGMGQK                       | 40  | 11 | 21 | 157.89 | b1b2*b2b3b4*b4b5b7b10y3*y3y4*y4y5*y5y6y7y9y10*y10y11                                                        | 1171.58 | 32.471  | 377585  | 2 | 586.29  | 5.21   |
| P63267 ACTH_HUMAN Actin | 8  |                                           | LDLAGRDLTDYLMK                    | 178 | 14 | 10 | 57.72  | b2b11b12y1y2y3y4y5y10y14                                                                                    | 1623.82 | 77.988  | 165841  | 3 | 541.94  | -14.66 |
| P63267 ACTH_HUMAN Actin | 9  |                                           | IIAPPERK                          | 329 | 8  | 11 | 66     | b2y2y3*y3y4*y4y5y6*y6y7y8                                                                                   | 923.56  | 25.872  | 152293  | 2 | 462.28  | -9.19  |
| P63267 ACTH_HUMAN Actin | 10 |                                           | IIAPPER                           | 329 | 7  | 9  | 52.63  | y1y3*y3y4y5*y5y6*y6y7                                                                                       | 795.46  | 32.583  | 87502   | 2 | 398.24  | -10.51 |
| P63267 ACTH_HUMAN Actin | 11 |                                           | HQGVMVGMGQKDSYVGDEAQS<br>K        | 40  | 22 | 9  | 38.1   | b3b9b11b13*b13b14y12*y12y22                                                                                 | 2351.06 | 58.380  | 18699   | 3 | 784.36  | -5.50  |
| P63267 ACTH_HUMAN Actin | 12 | Carbamidomethyl+C(1)                      | CPETLFPQPSFIGMESAGIHETTYNS<br>IMK | 257 | 28 | 10 | 61.86  | b5b7b8b9b10y4y5y9*y9y28                                                                                     | 3188.52 | 126.215 | 3332    | 3 | 1063.51 | 14.62  |
| P63267 ACTH_HUMAN Actin | 13 |                                           | DLYANNVLSGGTTMYPGIADR             | 292 | 21 | 4  | 36.72  | y7y12y13y14                                                                                                 | 2228.06 | 107.762 | 2403    | 3 | 743.36  | -2.74  |
| P63267 ACTH_HUMAN Actin | 14 |                                           | KDLYANNVLSGGTTMYPGIADR            | 291 | 22 | 3  | 21.8   | b12y5y6                                                                                                     | 2356.13 | 88.578  | 2307    | 2 | 1178.57 | -11.50 |
| P63267 ACTH_HUMAN Actin | 15 |                                           | IWHHSFYNELR                       | 85  | 11 | 5  | 23.63  | b4b10y5*y5*y5                                                                                               | 1501.75 | 61.440  | 15948   | 2 | 751.38  | 8.78   |
| P63267 ACTH_HUMAN Actin | 16 | Carbamidomethyl+C(1);<br>Phosphoryl STY() | CPETLFPQPSFIGMESAGIHETTYNS<br>IMK | 257 | 28 | 5  | 24.74  | b4b7b8y8y14                                                                                                 | 3268.42 | 86.915  | 14776   | 4 | 817.86  | -2.17  |
| P68133 ACTS_HUMAN Actin | 1  |                                           | SYELPDGQVITIGNER                  | 240 | 16 | 27 | 206.97 | b2b3*b3b6b8b9*b9b10b12*b12y3*y3y4*y4y5y6*y6y7y8y9y10y11*y11y12*y12y13y16                                    | 1790.90 | 70.748  | 2649301 | 2 | 895.95  | 2.39   |
| P68133 ACTS_HUMAN Actin | 2  |                                           | YPIEHGIITNWDMEK                   | 70  | 16 | 26 | 224.68 | b2b3b8b9b11*b11b12b14b15y1y3y4y5y6y7y8*y8y9y12*y12y13y14y15*y15y16*y16                                      | 1960.89 | 66.284  | 1926028 | 3 | 654.30  | -8.16  |
| P68133 ACTS_HUMAN Actin | 3  |                                           | AGFAGDDAPR                        | 20  | 10 | 20 | 141.51 | b1b2b3b4b5b8y1y2y3y4*y4y5*y5y6*y6y7*y7y8y9y10                                                               | 976.44  | 30.235  | 1748916 | 2 | 488.73  | -3.50  |
| P68133 ACTS_HUMAN Actin | 4  |                                           | EITALAPSTMK                       | 317 | 11 | 27 | 140.18 | b1b2*b2b3*b3b4*b4b5*b5b6*b6b11y1y2y3*y3y4*y4y5*y5y6*y6y7y8y9*y9y11                                          | 1161.62 | 50.233  | 1331932 | 2 | 581.31  | -0.32  |
| P68133 ACTS_HUMAN Actin | 5  |                                           | AVFPSIVGRPR                       | 30  | 11 | 13 | 106.12 | b1b2y1y2y3y4y5y6y7y8*y8y9y10                                                                                | 1198.71 | 55.587  | 1143213 | 2 | 599.86  | 3.56   |
| P68133 ACTS_HUMAN Actin | 6  |                                           | DSYVGDEAQSQR                      | 52  | 12 | 40 | 210.09 | b1*b1b2*b2b3*b3b4b5b6b9b10b11y1y2y3*y3y4*y4*y4y5*y5*y5y6*y6*y6y7*y7*y7y8*y8*y8y9*y9*y9y10*y10*y10y11y12*y12 | 1354.62 | 22.804  | 871441  | 2 | 677.81  | -2.79  |
| P68133 ACTS_HUMAN Actin | 7  |                                           | HQGVMVGMGQK                       | 41  | 11 | 21 | 157.89 | b1b2*b2b3b4*b4b5b7b10y3*y3y4*y4y5*y5y6y7y9y10*y10y11                                                        | 1171.58 | 32.471  | 377585  | 2 | 586.29  | 5.21   |
| P68133 ACTS_HUMAN Actin | 8  |                                           | LDLAGRDLTDYLMK                    | 179 | 14 | 10 | 57.72  | b2b11b12y1y2y3y4y5y10y14                                                                                    | 1623.82 | 77.988  | 165841  | 3 | 541.94  | -14.66 |
| P68133 ACTS_HUMAN Actin | 9  |                                           | IIAPPERK                          | 330 | 8  | 11 | 66     | b2y2y3*y3y4*y4y5y6*y6y7y8                                                                                   | 923.56  | 25.872  | 152293  | 2 | 462.28  | -9.19  |
| P68133 ACTS_HUMAN Actin | 10 |                                           | IIAPPER                           | 330 | 7  | 9  | 52.63  | y1y3*y3y4y5*y5y6*y6y7                                                                                       | 795.46  | 32.583  | 87502   | 2 | 398.24  | -10.51 |

|                                              |    |                                                |                                         |     |    |    |        |                                                                                                                              |         |         |         |   |         |        |
|----------------------------------------------|----|------------------------------------------------|-----------------------------------------|-----|----|----|--------|------------------------------------------------------------------------------------------------------------------------------|---------|---------|---------|---|---------|--------|
| P68133 ACTS_HUMAN Actin                      | 11 |                                                | HQGVVMVGMGQKDSYVGDDEAQS<br>K            | 41  | 22 | 9  | 38.1   | b3b9b11b13*b13b14y1<br>2*y12y22                                                                                              | 2351.06 | 58.380  | 18699   | 3 | 784.36  | -5.50  |
| P68133 ACTS_HUMAN Actin                      | 12 | Carbamidomethyl+C(1)                           | CPETLFPQPSFIGMESAGIHETTYNS<br>IMK       | 258 | 28 | 10 | 61.86  | b5b7b8b9b10y4y5y9*y9<br>y28                                                                                                  | 3188.52 | 126.215 | 3332    | 3 | 1063.51 | 14.62  |
| P68133 ACTS_HUMAN Actin                      | 13 | Carbamidomethyl+C(2)                           | LCYVALDFENEMATAASSSSLEK                 | 217 | 23 | 6  | 23.64  | b4b8*b8y4y9y14                                                                                                               | 2536.17 | 100.671 | 7001    | 2 | 1268.59 | 6.16   |
| P68133 ACTS_HUMAN Actin                      | 14 | Carbamidomethyl+C(1);<br>Carbamidomethyl+C(29) | CPETLFPQPSFIGMESAGIHETTYNS<br>IMKCDIDIR | 258 | 34 | 7  | 20.82  | b5y6y10*y10y13*y13y2<br>0                                                                                                    | 3960.84 | 95.535  | 214481  | 4 | 990.97  | 2.77   |
| P68133 ACTS_HUMAN Actin                      | 15 |                                                | GILTLKYPIEHGIITNWDDMEK                  | 64  | 22 | 12 | 103.91 | b3b4*b4b5y3y4y6y7y8y<br>12y14y15                                                                                             | 2586.30 | 82.402  | 106429  | 4 | 647.33  | -10.67 |
| P68133 ACTS_HUMAN Actin                      | 16 |                                                | RGILTLK                                 | 63  | 7  | 5  | 52.63  | b3b4b5*b5b6                                                                                                                  | 800.54  | 45.963  | 17479   | 1 | 800.54  | 4.27   |
| P68133 ACTS_HUMAN Actin                      | 17 |                                                | DLYANNVMSSGTTMYPGIADRM<br>QK            | 293 | 24 | 3  | 22.66  | b4b5b21                                                                                                                      | 2633.23 | 87.917  | 6988    | 3 | 878.42  | 7.05   |
| P68133 ACTS_HUMAN Actin                      | 18 |                                                | YPIEHGIITNWDDMEKIWHHTFYN<br>ELR         | 70  | 27 | 9  | 37.95  | b5b7y6*y6*y6y7*y7*y7<br>y8                                                                                                   | 3457.68 | 126.222 | 2920    | 3 | 1153.23 | 11.02  |
| P68133 ACTS_HUMAN Actin                      | 19 | Phosphoryl STY()                               | LDLAGRDLTDYLMK                          | 179 | 14 | 6  | 29.87  | b5b9*b9b10*b10y5                                                                                                             | 1703.80 | 36.862  | 6429    | 3 | 568.60  | 1.07   |
| P68133 ACTS_HUMAN Actin                      | 20 | Oxidation+M(8)                                 | DLYANNVMSSGTTMYPGIADR                   | 293 | 21 | 5  | 24.01  | b8y7*y7y10y11                                                                                                                | 2262.01 | 56.077  | 24388   | 2 | 1131.51 | -1.51  |
| P02042 HBD_HUMAN Hemoglobin<br>subunit delta | 1  |                                                | LLVVYPWTQR                              | 31  | 10 | 20 | 126.8  | b2b3b4b5y1y2*y2y3*y3<br>y4*y4y5*y5y6*y6y7*y7<br>y8y9y10                                                                      | 1274.72 | 78.095  | 1440083 | 2 | 637.87  | -0.77  |
| P02042 HBD_HUMAN Hemoglobin<br>subunit delta | 2  |                                                | VLGAFSDGLAHLNLIK                        | 67  | 16 | 12 | 80.08  | b3y1y3y4*y4y5y6*y6*y<br>6y9y10y14                                                                                            | 1669.87 | 75.993  | 823304  | 3 | 557.29  | -13.38 |
| P02042 HBD_HUMAN Hemoglobin<br>subunit delta | 3  |                                                | VVAGVANALAHK                            | 133 | 12 | 18 | 123.98 | b1b2b5y2y3y4y5y6*y6y<br>7*y7y8y9*y9y10*y10y1<br>1y12                                                                         | 1149.67 | 41.753  | 392352  | 2 | 575.34  | -2.12  |
| P02042 HBD_HUMAN Hemoglobin<br>subunit delta | 4  | Carbamidomethyl+C(11)                          | GTFSQSELHCDK                            | 83  | 13 | 8  | 33.54  | b10*b10b12y1y2y4y5y1<br>3                                                                                                    | 1521.71 | 65.217  | 170028  | 2 | 761.36  | 3.53   |
| P02042 HBD_HUMAN Hemoglobin<br>subunit delta | 5  |                                                | LHVDPENFR                               | 96  | 9  | 16 | 134.15 | b2b3b4b6b8y2y3*y3y4*<br>y4*y4y5y6y7y8y9                                                                                      | 1126.56 | 46.791  | 110408  | 2 | 563.79  | 0.33   |
| P02042 HBD_HUMAN Hemoglobin<br>subunit delta | 6  |                                                | VNVDVAVGGEALGR                          | 18  | 13 | 3  | 24.79  | b6y6y7                                                                                                                       | 1256.66 | 49.722  | 25980   | 2 | 628.83  | -2.53  |
| P02042 HBD_HUMAN Hemoglobin<br>subunit delta | 7  |                                                | FFESFGDLSSPDVAVMGNPKVK                  | 41  | 21 | 4  | 20.1   | b9*b9b11b20                                                                                                                  | 2272.12 | 41.656  | 116108  | 3 | 758.05  | 11.39  |
| P02042 HBD_HUMAN Hemoglobin<br>subunit delta | 8  |                                                | VVAGVANALAHKYH                          | 133 | 14 | 13 | 142.95 | b3b12b13*b13y3y4y5y6<br>y7y8y9y11y12                                                                                         | 1449.80 | 45.387  | 51575   | 2 | 725.40  | 0.25   |
| P02042 HBD_HUMAN Hemoglobin<br>subunit delta | 9  | Phosphoryl STY(10)                             | FFESFGDLSSPDVAVMGNPK                    | 41  | 19 | 5  | 30.61  | b3b9y5y6y9                                                                                                                   | 2124.92 | 105.892 | 28126   | 3 | 708.98  | 13.33  |
| P02042 HBD_HUMAN Hemoglobin<br>subunit delta | 10 | Oxidation+M(10)                                | NFGKEFTPQMQAAYQK                        | 117 | 16 | 5  | 38.05  | b5b10*b10b12b14                                                                                                              | 1903.90 | 54.328  | 4318    | 2 | 952.45  | -1.92  |
| P02042 HBD_HUMAN Hemoglobin<br>subunit delta | 11 | Oxidation+M(1)                                 | MVHLTPEEK                               | 0   | 9  | 3  | 29.76  | b4b7y5                                                                                                                       | 1099.56 | 40.868  | 2022    | 2 | 550.28  | 10.66  |
| P08567 PLEK_HUMAN Pleckstrin                 | 1  |                                                | EDPAYLHYYPAGAEDPLGAIHLR                 | 269 | 24 | 20 | 127.87 | b2*b2b10*b10b12b14b1<br>5y1y2y3y4y5y6y7y8y9y<br>12y14y22y24                                                                  | 2683.25 | 78.832  | 218064  | 4 | 671.57  | -9.74  |
| P08567 PLEK_HUMAN Pleckstrin                 | 2  |                                                | SEEEENLFEIITAEVHYFLQAATPK               | 308 | 25 | 38 | 259.88 | b1b2b3*b3b4*b4b5*b5*<br>b5b6*b6*b6b9*b9*b9b1<br>0b13y2y3y5y6*y6y8y10<br>y12y13*y13y14y15y16y<br>18y19y20y21y22*y22y2<br>3y25 | 2894.41 | 121.854 | 154220  | 3 | 965.47  | -0.17  |
| P08567 PLEK_HUMAN Pleckstrin                 | 3  |                                                | QQDHFFQAFLER                            | 75  | 14 | 12 | 93.1   | b6b14y2y3y5*y5y6y7y9<br>y10y12y14                                                                                            | 1765.82 | 71.221  | 72195   | 3 | 589.28  | -4.36  |



|                              |    |                                                |                                  |     |    |    |        |                                                                                                     |         |         |        |   |         |        |
|------------------------------|----|------------------------------------------------|----------------------------------|-----|----|----|--------|-----------------------------------------------------------------------------------------------------|---------|---------|--------|---|---------|--------|
| P08567 PLEK_HUMAN Pleckstrin | 4  |                                                | QEGLMIASSLLNEGYLQPA GDMS<br>K    | 174 | 24 | 10 | 42.15  | b4b14y3y7y10y13°y13y<br>15*y15y24                                                                   | 2552.23 | 90.840  | 57360  | 3 | 851.42  | -2.30  |
| P08567 PLEK_HUMAN Pleckstrin | 5  | Carbamidomethyl+C(8)                           | GSTLTSPCQDFGKR                   | 51  | 14 | 14 | 78.17  | b6b9b10y2y4y7*y7y8°y<br>8*y8y9*y9y10y14                                                             | 1553.75 | 41.038  | 32447  | 2 | 777.38  | 5.19   |
| P08567 PLEK_HUMAN Pleckstrin | 6  | Carbamidomethyl+C(5);<br>Carbamidomethyl+C(10) | IFNHCFGTGNCVIDWLVSNQSVR          | 150 | 22 | 5  | 23.56  | b13y6y7y9y22                                                                                        | 2666.29 | 91.739  | 15299  | 2 | 1333.65 | 10.99  |
| P08567 PLEK_HUMAN Pleckstrin | 7  | Carbamidomethyl+C(2)                           | GCVVTSVESNSNGRK                  | 293 | 15 | 7  | 54.24  | b2y7y8y10y11y12y15                                                                                  | 1593.75 | 28.816  | 10925  | 3 | 531.92  | -7.66  |
| P08567 PLEK_HUMAN Pleckstrin | 8  | Carbamidomethyl+C(8)                           | GSTLTSPCQDFGK                    | 51  | 13 | 10 | 83.18  | b1b3b5b9b13y4y5y6y7y<br>10                                                                          | 1397.62 | 43.562  | 8992   | 2 | 699.31  | -14.67 |
| P08567 PLEK_HUMAN Pleckstrin | 9  |                                                | LPETIDLGALYLSMK                  | 119 | 15 | 3  | 25.65  | b4b5b11                                                                                             | 1663.91 | 116.099 | 22511  | 2 | 832.46  | 10.34  |
| P08567 PLEK_HUMAN Pleckstrin | 10 |                                                | MFVFK                            | 65  | 5  | 1  | 12.94  | y4                                                                                                  | 671.35  | 59.838  | 10752  | 2 | 336.18  | -7.82  |
| P08567 PLEK_HUMAN Pleckstrin | 11 |                                                | ELNLEK                           | 141 | 6  | 1  | 13.37  | b5                                                                                                  | 745.41  | 21.695  | 6641   | 2 | 373.21  | 6.06   |
| P08567 PLEK_HUMAN Pleckstrin | 12 |                                                | DAWVR                            | 89  | 5  | 1  | 12.94  | b4                                                                                                  | 646.33  | 42.227  | 3766   | 1 | 646.33  | -3.21  |
| P08567 PLEK_HUMAN Pleckstrin | 13 |                                                | GSVFNTWKPMWVVLLEDGIEFYK          | 14  | 23 | 5  | 21.72  | b6y8°y8y9°y9                                                                                        | 2758.36 | 41.580  | 3416   | 6 | 460.57  | -11.68 |
| P08567 PLEK_HUMAN Pleckstrin | 14 | Carbamidomethyl+C(2)                           | GCVVTSVESNSNGR                   | 293 | 14 | 4  | 18.69  | b4b6°b6y11                                                                                          | 1465.68 | 86.364  | 2320   | 2 | 733.34  | 5.08   |
| P08567 PLEK_HUMAN Pleckstrin | 15 |                                                | NRQEGLMIASSLLNEGYLQPA GD<br>MSK  | 172 | 26 | 5  | 17.72  | b4b7b11°b11y7                                                                                       | 2822.38 | 85.763  | 52355  | 3 | 941.46  | -1.21  |
| P08567 PLEK_HUMAN Pleckstrin | 16 |                                                | KSEENLFEIITADEVHYFLQAATP<br>K    | 307 | 26 | 6  | 35.08  | b8°b8*b8b9°b9b10                                                                                    | 3022.49 | 115.897 | 22241  | 3 | 1008.17 | -5.09  |
| P08567 PLEK_HUMAN Pleckstrin | 17 | Carbamidomethyl+C(14)                          | GMIPLKGSTLTSPCQDFGK              | 45  | 19 | 4  | 23.65  | y4y5°y5y14                                                                                          | 2036.99 | 103.192 | 18242  | 2 | 1019.00 | -12.28 |
| P08567 PLEK_HUMAN Pleckstrin | 18 |                                                | LPETIDLGALYLSMKDTEK              | 119 | 19 | 7  | 39.57  | b4b14y3y6°y6y8y10                                                                                   | 2137.10 | 87.898  | 17155  | 3 | 713.04  | -4.80  |
| P08567 PLEK_HUMAN Pleckstrin | 19 | Carbamidomethyl+C(2)                           | GCVVTSVESNSNGRK                  | 293 | 15 | 4  | 28.59  | b12y6y7y11                                                                                          | 1593.74 | 45.036  | 5810   | 2 | 797.37  | -14.25 |
| P08567 PLEK_HUMAN Pleckstrin | 20 | Carbamidomethyl+C(5);<br>Carbamidomethyl+C(10) | IFNHCFGTGNCVIDWLVSNQSVRN<br>R    | 150 | 24 | 4  | 18.68  | b3b7b11°b11                                                                                         | 2936.44 | 97.156  | 3712   | 3 | 979.49  | 12.55  |
| P08567 PLEK_HUMAN Pleckstrin | 21 |                                                | KGSVFNTWKPMWVVLLEDGIEFY<br>K     | 13  | 24 | 5  | 16.25  | b7°b7b11y4y7                                                                                        | 2886.46 | 117.024 | 1581   | 3 | 962.83  | -9.47  |
| P08567 PLEK_HUMAN Pleckstrin | 22 | Phosphoryl STY(4)                              | LPETIDLGALYLSMK                  | 119 | 15 | 7  | 52.2   | b3b9b12b13y13°y13y14                                                                                | 1743.85 | 83.512  | 6228   | 2 | 872.43  | -5.04  |
| P08567 PLEK_HUMAN Pleckstrin | 23 | Carbamidomethyl+C(2);<br>Phosphoryl STY(6)     | GCVVTSVESNSNGRK                  | 293 | 15 | 7  | 30.97  | b4b5°b5y8y11_HPO3<br>y11°y11*y11                                                                    | 1673.72 | 41.056  | 1839   | 2 | 837.36  | -0.44  |
| P08567 PLEK_HUMAN Pleckstrin | 24 | Carbamidomethyl+C(4)                           | TSPCQDFGKR                       | 55  | 10 | 0  | 3.87   |                                                                                                     | 1195.56 | 40.981  | 3664   | 2 | 598.29  | 9.39   |
| P08567 PLEK_HUMAN Pleckstrin | 25 |                                                | EDPAYLHYYPAGAEDPLGAIHLR          | 269 | 24 | 0  | 8.18   |                                                                                                     | 2665.25 | 78.812  | 23112  | 4 | 667.07  | -5.13  |
| P08567 PLEK_HUMAN Pleckstrin | 26 | Carbamidomethyl+C(8)                           | GSTLTSPCQDFGKR                   | 51  | 14 | 0  | 3.87   |                                                                                                     | 1535.72 | 41.016  | 8751   | 3 | 512.58  | -0.32  |
| P08567 PLEK_HUMAN Pleckstrin | 27 | Carbamidomethyl+C(8)                           | GSTLTSPCQDFGK                    | 51  | 13 | 0  | 3.44   |                                                                                                     | 1379.62 | 43.549  | 2297   | 2 | 690.31  | -2.74  |
| P18206 VINC_HUMAN Vinculin   | 1  |                                                | TIESILEPVAQQISHLVIMHEEGEV<br>DGK | 7   | 28 | 32 | 210.99 | b1b2°b2b3°b3b4°b4b5°<br>b5b6°b6y1y2y3y4°y4y6<br>y7y8y9°y9y10y11y12y1<br>3y21y22y23y25y26°y26<br>y28 | 3101.56 | 110.524 | 147053 | 4 | 776.14  | -8.42  |
| P18206 VINC_HUMAN Vinculin   | 2  |                                                | QVATALQNLQTK                     | 464 | 12 | 19 | 91.78  | b2°b2b3°b3b5°b5°b5b1<br>2y2y3°y3°y3y4y5y7y9y<br>10*y10y12                                           | 1314.73 | 48.213  | 141177 | 2 | 657.87  | -2.14  |

|                            |    |  |                             |      |    |    |        |                                                        |         |         |        |   |         |        |
|----------------------------|----|--|-----------------------------|------|----|----|--------|--------------------------------------------------------|---------|---------|--------|---|---------|--------|
| P18206 VINC_HUMAN Vinculin | 3  |  | AQQVSQLDVLTAK               | 352  | 14 | 15 | 90.81  | b2*b2b3b4b5b12y1y2y3y8y10y11y12*y12y14                 | 1457.80 | 57.695  | 125939 | 2 | 729.40  | 2.60   |
| P18206 VINC_HUMAN Vinculin | 4  |  | AVAGNISDPGLQK               | 802  | 13 | 14 | 138.03 | b2b6b7b8y3y5*y5y6y7y8y9y10y11y13                       | 1269.68 | 39.815  | 122035 | 2 | 635.34  | 0.10   |
| P18206 VINC_HUMAN Vinculin | 5  |  | AIPDLTAPVAAVQAAVSNLVR       | 35   | 21 | 21 | 146.51 | b2b4b5b6b7*b7y1y2y3y4*y4y5*y5y6*y6y7y8y14y15y16y21     | 2076.16 | 117.919 | 114707 | 3 | 692.73  | -8.94  |
| P18206 VINC_HUMAN Vinculin | 6  |  | ELTPQVVSAAR                 | 669  | 11 | 12 | 109.06 | b4*b4b10y3y4y5y6y7y8*y8y9y11                           | 1170.65 | 45.484  | 114291 | 2 | 585.83  | 1.67   |
| P18206 VINC_HUMAN Vinculin | 7  |  | TNISDEESEQATEMLVHNAQNLMQSVK | 1076 | 27 | 21 | 130.21 | b1b2*b2*b2b3b4*b4b5y1y3y4y5y11y13y15y20y21y22y24y25y27 | 3046.42 | 95.907  | 103905 | 3 | 1016.14 | 2.24   |
| P18206 VINC_HUMAN Vinculin | 8  |  | LLAVAATAPPDAPNREEVFDER      | 607  | 22 | 11 | 38.1   | b2b3y1y2y11y12*y12y14y16y18y22                         | 2381.21 | 61.416  | 82408  | 3 | 794.41  | 1.33   |
| P18206 VINC_HUMAN Vinculin | 9  |  | ELLPVLISAMK                 | 199  | 11 | 11 | 69.44  | b2*b2b3y2y4*y4y5y6y8y9y11                              | 1213.72 | 90.823  | 79515  | 2 | 607.36  | -4.43  |
| P18206 VINC_HUMAN Vinculin | 10 |  | VAMANIQQMLVAGATSIAR         | 738  | 20 | 15 | 90.87  | b1b3b4b5b10b15y1y2y3y5y7y8y13y14y20                    | 2042.10 | 83.590  | 77175  | 2 | 1021.55 | 5.38   |
| P18206 VINC_HUMAN Vinculin | 11 |  | ALASQLQDSLK                 | 570  | 11 | 6  | 40.55  | b2b5y3y6y9y11                                          | 1173.65 | 54.269  | 67196  | 2 | 587.33  | -0.94  |
| P18206 VINC_HUMAN Vinculin | 12 |  | MTGLVDEAIDTK                | 708  | 12 | 10 | 91.78  | b4b11y2y3y5y6y7y10y11y12                               | 1292.64 | 57.251  | 67120  | 2 | 646.82  | 1.23   |
| P18206 VINC_HUMAN Vinculin | 13 |  | STVEGIQASVK                 | 655  | 11 | 10 | 80.24  | b2*b2y2y3y4y5y6y7y9y11                                 | 1118.60 | 39.415  | 62716  | 2 | 559.80  | -8.29  |
| P18206 VINC_HUMAN Vinculin | 14 |  | LVQAAQMLQSDPYVSPAR          | 87   | 18 | 16 | 83.67  | b2b11b15*b15y1y3y7y8*y8y9y10y11*y11y13*y13y18          | 1974.02 | 65.468  | 57910  | 2 | 987.52  | 6.31   |
| P18206 VINC_HUMAN Vinculin | 15 |  | ETVQTTEDQILKR               | 59   | 13 | 13 | 106.98 | b2*b2y1y2y3y4y5y6y7y8y9y10y13                          | 1560.81 | 46.544  | 55159  | 3 | 520.94  | -5.63  |
| P18206 VINC_HUMAN Vinculin | 16 |  | GWLRDPSASPGDAGEQAIR         | 281  | 19 | 6  | 25.13  | b9*b9y2y3y9y10                                         | 1982.96 | 53.353  | 53962  | 3 | 661.66  | -3.14  |
| P18206 VINC_HUMAN Vinculin | 17 |  | ALASQLQDSLKDLK              | 570  | 14 | 7  | 43.88  | b2y1y2y3y6y9y12                                        | 1529.84 | 66.633  | 53451  | 3 | 510.62  | -11.57 |
| P18206 VINC_HUMAN Vinculin | 18 |  | WIDNPTVDDR                  | 502  | 10 | 9  | 42.16  | b2b7*b7*b7y2y6y7y8y10                                  | 1230.58 | 47.690  | 50097  | 2 | 615.79  | 1.98   |
| P18206 VINC_HUMAN Vinculin | 19 |  | AGEVINQPMMAAR               | 889  | 14 | 10 | 95.58  | b3b4b6b7y3y4y5y6y9y14                                  | 1518.73 | 58.304  | 48642  | 2 | 759.87  | 5.14   |
| P18206 VINC_HUMAN Vinculin | 20 |  | MQEAMTQEVSDVFSDTTPIK        | 586  | 21 | 9  | 44.3   | b13y1y2y3y8y9y15y16y21                                 | 2358.10 | 79.931  | 46939  | 2 | 1179.56 | 8.80   |
| P18206 VINC_HUMAN Vinculin | 21 |  | LLAVAATAPPDAPNR             | 607  | 15 | 11 | 67.12  | b2b8y1y3y4y7y9y10y11*y11y15                            | 1476.82 | 50.639  | 46596  | 2 | 738.92  | 4.30   |
| P18206 VINC_HUMAN Vinculin | 22 |  | VMLVNSMNTVK                 | 188  | 11 | 5  | 26.64  | b2b6y9y10y11                                           | 1235.65 | 54.492  | 41041  | 2 | 618.33  | 1.48   |
| P18206 VINC_HUMAN Vinculin | 23 |  | NQWIDNVEK                   | 699  | 9  | 7  | 29.76  | b1b7y4*y4y5*y5y9                                       | 1145.55 | 49.468  | 39989  | 2 | 573.28  | -4.58  |
| P18206 VINC_HUMAN Vinculin | 24 |  | MALLMAEMSR                  | 993  | 10 | 6  | 36.21  | b10*b10y5y6y7y10                                       | 1152.56 | 72.024  | 32575  | 2 | 576.78  | 2.65   |
| P18206 VINC_HUMAN Vinculin | 25 |  | GQGSSPVAMQK                 | 341  | 11 | 16 | 92.32  | b2*b2b4b7b8*b8y1y4*y4y6y7y8*y8y9*y9y11                 | 1089.53 | 25.708  | 29761  | 2 | 545.27  | -1.57  |
| P18206 VINC_HUMAN Vinculin | 26 |  | GNDIAAAK                    | 983  | 9  | 6  | 29.76  | b5*b5*b5y4y5y9                                         | 872.48  | 34.877  | 18023  | 2 | 436.75  | -0.07  |
| P18206 VINC_HUMAN Vinculin | 27 |  | DPSASPGDAGEQAIR             | 285  | 15 | 4  | 34.1   | y10y11y12y15                                           | 1470.69 | 34.648  | 17869  | 2 | 735.85  | 5.98   |
| P18206 VINC_HUMAN Vinculin | 28 |  | LVQAAQMLQSDPYVSPARDYLIDGSR  | 87   | 26 | 9  | 31.49  | b6*b6b12*b12b15y4y5y10*y10                             | 2893.46 | 76.270  | 17027  | 3 | 965.16  | 2.95   |
| P18206 VINC_HUMAN Vinculin | 29 |  | VLQLTSWEDAWASKDTEAMK        | 246  | 21 | 4  | 24.01  | b8y4y5y8                                               | 2424.13 | 75.377  | 16679  | 3 | 808.72  | -2.62  |
| P18206 VINC_HUMAN Vinculin | 30 |  | GNDIAAAKR                   | 983  | 10 | 3  | 27.97  | b3y5y6                                                 | 1028.58 | 31.893  | 5193   | 2 | 514.79  | -6.05  |
| P18206 VINC_HUMAN Vinculin | 31 |  | LTDELAPPKPLPEGEVPPRPPPEEK   | 853  | 28 | 4  | 24.61  | b11b12y5y22                                            | 3023.60 | 60.276  | 170597 | 4 | 756.65  | -4.28  |
| P18206 VINC_HUMAN Vinculin | 32 |  | SLGEISALTSK                 | 433  | 11 | 3  | 30.62  | y3y8y9                                                 | 1105.60 | 57.429  | 79194  | 2 | 553.31  | -5.08  |

|                                                            |    |                       |                                  |     |    |    |       |                                 |         |         |        |   |         |        |
|------------------------------------------------------------|----|-----------------------|----------------------------------|-----|----|----|-------|---------------------------------|---------|---------|--------|---|---------|--------|
| IP18206 VINC_HUMAN Vinculin                                | 33 |                       | IDAAQNWLADPNGGPEGEEQIR           | 387 | 22 | 4  | 13.05 | b11*b11y11y14                   | 2380.17 | 83.210  | 57399  | 3 | 794.06  | 21.03  |
| IP18206 VINC_HUMAN Vinculin                                | 34 |                       | VLQLTSWDEDAWASK                  | 246 | 15 | 5  | 28.59 | b13y3y5*y5y6                    | 1748.82 | 80.624  | 34960  | 2 | 874.91  | -17.66 |
| IP18206 VINC_HUMAN Vinculin                                | 35 |                       | NPGNQAAAYEHFETMK                 | 684 | 15 | 8  | 67.58 | b6b7y6y8y9*y9y10y14             | 1736.76 | 46.615  | 31255  | 3 | 579.59  | -3.80  |
| IP18206 VINC_HUMAN Vinculin                                | 36 |                       | GILSGTSDLLTFDEAEVR               | 113 | 19 | 4  | 27.73 | b5b15y5y6                       | 2036.02 | 60.687  | 10329  | 2 | 1018.51 | -19.13 |
| IP18206 VINC_HUMAN Vinculin                                | 37 |                       | NQGIEEALK                        | 219 | 9  | 4  | 37.54 | b5*b5b6b8                       | 1001.53 | 41.078  | 6282   | 1 | 1001.53 | 1.34   |
| IP18206 VINC_HUMAN Vinculin                                | 38 |                       | QQELTHQEHR                       | 178 | 10 | 6  | 36.21 | y3*y3y4*y4*y4y5                 | 1305.62 | 13.828  | 6116   | 3 | 435.88  | -8.98  |
| IP18206 VINC_HUMAN Vinculin                                | 39 |                       | GEGESPOAR                        | 561 | 9  | 3  | 37.54 | y4y7y8                          | 930.44  | 114.272 | 5106   | 1 | 930.44  | 12.86  |
| IP18206 VINC_HUMAN Vinculin                                | 40 |                       | MLGQMTDQVADLR                    | 326 | 13 | 9  | 51.55 | b6b10b11*b11*b11y9y10y12*y12    | 1477.70 | 52.973  | 3519   | 2 | 739.36  | -7.35  |
| IP18206 VINC_HUMAN Vinculin                                | 41 |                       | SLLDASEEAIK                      | 720 | 11 | 4  | 37.36 | b3b7y8y9                        | 1175.59 | 61.366  | 3350   | 1 | 1175.59 | -21.91 |
| IP18206 VINC_HUMAN Vinculin                                | 42 | Carbamidomethyl+C(5)  | VGELCAGK                         | 308 | 8  | 4  | 40.12 | y5y6y7*y7                       | 833.42  | 42.237  | 2599   | 2 | 417.21  | 1.32   |
| IP18206 VINC_HUMAN Vinculin                                | 43 |                       | GVGQAIR                          | 512 | 8  | 4  | 35.35 | b3b5y6*y6                       | 771.44  | 25.015  | 2356   | 2 | 386.23  | -4.75  |
| IP18206 VINC_HUMAN Vinculin                                | 44 | Carbamidomethyl+C(5)  | IAELCDDPK                        | 417 | 9  | 6  | 44.46 | b6*b6y5y6*y6y7                  | 1060.50 | 92.751  | 2158   | 1 | 1060.50 | 2.65   |
| IP18206 VINC_HUMAN Vinculin                                | 45 |                       | LANVMMGPYR                       | 528 | 10 | 3  | 26.21 | b9y6y9                          | 1151.59 | 48.820  | 2071   | 2 | 576.30  | 19.93  |
| IP18206 VINC_HUMAN Vinculin                                | 46 |                       | NFTVEK                           | 230 | 6  | 1  | 13.37 | b5                              | 737.39  | 49.026  | 1849   | 2 | 369.20  | 10.26  |
| IP18206 VINC_HUMAN Vinculin                                | 47 |                       | LNQAK                            | 276 | 5  | 2  | 25.88 | b4y4                            | 573.33  | 29.278  | 1592   | 1 | 573.33  | -10.33 |
| IP18206 VINC_HUMAN Vinculin                                | 48 |                       | AQQVSQGLDVLTAKVENAAR             | 352 | 20 | 4  | 24.53 | b4y5y6y13                       | 2098.14 | 117.910 | 133007 | 3 | 700.05  | 8.84   |
| IP18206 VINC_HUMAN Vinculin                                | 49 |                       | KIDAAQNWLADPNGGPEGEEQIR          | 386 | 23 | 10 | 43.99 | b11*b11b13*b13y6y8y10y12*y12y14 | 2508.20 | 61.544  | 94819  | 3 | 836.74  | -5.35  |
| IP18206 VINC_HUMAN Vinculin                                | 50 |                       | IEQAQRWIDNPTVDDR                 | 496 | 16 | 3  | 16.61 | b4b14y3                         | 1955.97 | 79.360  | 28507  | 2 | 978.49  | 8.43   |
| IP18206 VINC_HUMAN Vinculin                                | 51 |                       | EVENSEDPKFR                      | 769 | 11 | 6  | 64.28 | y3y4y5y8*y8y9                   | 1349.61 | 28.637  | 27670  | 3 | 450.54  | -14.38 |
| IP18206 VINC_HUMAN Vinculin                                | 52 |                       | EAVKAASDELSK                     | 780 | 12 | 3  | 25.61 | b9y6y7                          | 1247.63 | 58.337  | 21567  | 3 | 416.55  | -12.72 |
| IP18206 VINC_HUMAN Vinculin                                | 53 |                       | ARMQEAMTQEVSDVFSDTTPIK           | 584 | 23 | 5  | 28.55 | b3b4b11b13y3                    | 2585.20 | 72.004  | 21201  | 3 | 862.40  | -9.92  |
| IP18206 VINC_HUMAN Vinculin                                | 54 | Carbamidomethyl+C(13) | DMPPAFIKVENACTK                  | 72  | 15 | 4  | 17.57 | b13y4y10*y10                    | 1720.86 | 60.650  | 19789  | 3 | 574.29  | 12.77  |
| IP18206 VINC_HUMAN Vinculin                                | 55 |                       | MSAEINEIRVLQLTSWDEDAWASK         | 236 | 25 | 7  | 35.67 | b8b9*b9*b9y6y7y13               | 2905.41 | 88.979  | 18547  | 3 | 969.14  | -9.75  |
| IP18206 VINC_HUMAN Vinculin                                | 56 |                       | LANVMMGPYRQDLLAK                 | 528 | 16 | 4  | 34.02 | b11b12b13*b13                   | 1819.98 | 99.613  | 12076  | 3 | 607.33  | 11.27  |
| IP18206 VINC_HUMAN Vinculin                                | 57 | Carbamidomethyl+C(6)  | EILGTCKMLGQMTDQVADLR             | 319 | 20 | 8  | 41.14 | b3b6b9b12*b12b13y10*y10         | 2279.11 | 104.488 | 10500  | 3 | 760.38  | -3.64  |
| IP18206 VINC_HUMAN Vinculin                                | 58 |                       | AGEVINQPMMAARQLHDEAR             | 889 | 21 | 4  | 21    | b7b9b13y4                       | 2368.13 | 94.572  | 7652   | 3 | 790.05  | -2.27  |
| IP18206 VINC_HUMAN Vinculin                                | 59 |                       | IDAAQNWLADPNGGPEGEEQIRGALAEAR    | 387 | 29 | 7  | 36.59 | b3b7b13b17y3y4*y4               | 3048.52 | 82.122  | 6448   | 3 | 1016.84 | 13.94  |
| IP18206 VINC_HUMAN Vinculin                                | 60 | Carbamidomethyl+C(13) | QILDEAGKVGELCAGK                 | 300 | 16 | 4  | 24.32 | y4y6*y6y8                       | 1687.87 | 53.644  | 2119   | 2 | 844.44  | 1.45   |
| IP18206 VINC_HUMAN Vinculin                                | 61 |                       | AASDELSKTISPMVMDAK               | 784 | 18 | 5  | 22.49 | b15*b15y7y8*y8                  | 1893.94 | 92.749  | 2096   | 2 | 947.48  | 7.73   |
| IP18206 VINC_HUMAN Vinculin                                | 62 |                       | GWLRDPSASPGDAGEQAIR              | 281 | 19 | 5  | 25.13 | b6y9y10*y10y12                  | 1982.97 | 92.765  | 1594   | 3 | 661.66  | 1.72   |
| IP18206 VINC_HUMAN Vinculin                                | 63 | Phosphoryl STY(9)     | STVEQIASVK                       | 655 | 11 | 4  | 35.39 | b6b8*b8b10                      | 1198.57 | 27.793  | 8832   | 2 | 599.79  | 7.43   |
| IP18206 VINC_HUMAN Vinculin                                | 64 | Phosphoryl STY(14)    | GILEYLTVAEVQTMEDLVITYTK          | 139 | 23 | 4  | 22.77 | y3y8*y8y9                       | 2696.28 | 103.211 | 5270   | 3 | 899.43  | -4.44  |
| IP18206 VINC_HUMAN Vinculin                                | 65 | Phosphoryl STY(5)     | VGKETVQTTEDQILK                  | 56  | 15 | 6  | 28.59 | b4*b4b7b8y11*y11                | 1768.85 | 89.153  | 4007   | 2 | 884.93  | -7.59  |
| IP18206 VINC_HUMAN Vinculin                                | 66 | Oxidation+M(19)       | TIESILEPVAQQISHLVIMHEEGEV<br>DGK | 7   | 28 | 3  | 17.49 | y3y11y23                        | 3117.55 | 107.122 | 13827  | 4 | 780.14  | -10.26 |
| IP18206 VINC_HUMAN Vinculin                                | 67 | Oxidation+M(1)        | MSAEINEIR                        | 236 | 10 | 3  | 26.21 | b3b9y3                          | 1191.62 | 34.498  | 9297   | 2 | 596.31  | 10.96  |
| IP18206 VINC_HUMAN Vinculin                                | 68 | Oxidation+M(4)        | LEAMTNSK                         | 373 | 8  | 3  | 35.35 | b3b5y7                          | 909.43  | 42.252  | 2446   | 2 | 455.22  | -8.86  |
| IP18206 VINC_HUMAN Vinculin                                | 69 | Oxidation+M(14)       | NPGNQAAAYEHFETMK                 | 684 | 15 | 6  | 38.8  | b3b6b7b11y4*y4                  | 1752.78 | 96.789  | 1742   | 3 | 584.93  | 9.89   |
| IP18206 VINC_HUMAN Vinculin                                | 70 |                       | PPDAPNR                          | 615 | 7  | 0  | 4.3   |                                 | 766.38  | 50.709  | 3496   | 2 | 383.69  | -2.87  |
| IP18206 VINC_HUMAN Vinculin                                | 71 |                       | ETVQTTEDQILKR                    | 59  | 13 | 0  | 3.44  |                                 | 1543.81 | 46.542  | 14313  | 3 | 515.27  | 9.25   |
| IP18206 VINC_HUMAN Vinculin                                | 72 |                       | ELLPVLISAMK                      | 199 | 11 | 0  | 2.58  |                                 | 1195.70 | 90.848  | 2918   | 2 | 598.35  | -8.27  |
| IP04406 G3P_HUMAN Glyceraldehyde-3-phosphate dehydrogenase | 1  |                       | LISWYDNEFGYSNR                   | 309 | 14 | 12 | 133.3 | b14y3y4y5y6y7y8y9y10y11y12y14   | 1763.81 | 75.709  | 186639 | 2 | 882.41  | 4.64   |

|                                                            |    |                                             |                                     |     |    |    |        |                                                                                  |         |         |        |   |         |        |
|------------------------------------------------------------|----|---------------------------------------------|-------------------------------------|-----|----|----|--------|----------------------------------------------------------------------------------|---------|---------|--------|---|---------|--------|
| P04406 G3P_HUMAN Glycerlaldehyde-3-phosphate dehydrogenase | 2  |                                             | VIHDNFGIVEGLMTTVHAITATQK            | 162 | 24 | 30 | 221.34 | b3b4°b4b5*b5b6b7*b7b8°b8*b8b9b13b24y2*y2y3y4y5°y5y6y7y8y11y12y14y15y21y22y24     | 2595.32 | 103.138 | 175636 | 4 | 649.59  | -14.67 |
| P04406 G3P_HUMAN Glycerlaldehyde-3-phosphate dehydrogenase | 3  |                                             | LVINGNPITIFQERDPSK                  | 66  | 18 | 8  | 58.78  | b2y3y8y12y14y15y16y18                                                            | 2041.09 | 77.114  | 168710 | 3 | 681.04  | -6.28  |
| P04406 G3P_HUMAN Glycerlaldehyde-3-phosphate dehydrogenase | 4  | Carbamidomethyl+C(7); Carbamidomethyl+C(11) | IISNASCTTNCLAPLAK                   | 145 | 17 | 27 | 167.05 | b2b3b7°b7b11b12°b12b13°b13*b13b16y2y3y4y5y8y9y11°y11y12°y12y13°y13*y13y15*y15y17 | 1833.93 | 54.352  | 123389 | 2 | 917.47  | 4.66   |
| P04406 G3P_HUMAN Glycerlaldehyde-3-phosphate dehydrogenase | 5  |                                             | GALQNIIPASTGAAK                     | 200 | 15 | 10 | 98.74  | b3b4b5y4y7y8y9y10y11y15                                                          | 1411.80 | 59.613  | 115101 | 2 | 706.40  | 5.62   |
| P04406 G3P_HUMAN Glycerlaldehyde-3-phosphate dehydrogenase | 6  | Carbamidomethyl+C(13)                       | VPTANVSVVDLTCR                      | 234 | 14 | 11 | 98.1   | b5b6b12y4°y4y5y6y8y10y12y14                                                      | 1530.80 | 61.236  | 107049 | 2 | 765.90  | 3.43   |
| P04406 G3P_HUMAN Glycerlaldehyde-3-phosphate dehydrogenase | 7  |                                             | LVINGNPITIFQER                      | 66  | 14 | 11 | 101.11 | b2b3b6y4y5y6y8y10y11y12y14                                                       | 1613.90 | 83.891  | 82782  | 2 | 807.45  | -3.03  |
| P04406 G3P_HUMAN Glycerlaldehyde-3-phosphate dehydrogenase | 8  |                                             | VIISAPSADAPMFVMGVNHEK               | 118 | 21 | 8  | 34.99  | b2b3b5y6y11y12y16y21                                                             | 2213.11 | 75.097  | 67259  | 3 | 738.37  | -1.99  |
| P04406 G3P_HUMAN Glycerlaldehyde-3-phosphate dehydrogenase | 9  |                                             | WGDAGAEYVVESTGVFTTMEK               | 86  | 21 | 3  | 13.46  | b7y6y12                                                                          | 2277.06 | 86.244  | 18084  | 2 | 1139.04 | 11.47  |
| P04406 G3P_HUMAN Glycerlaldehyde-3-phosphate dehydrogenase | 10 |                                             | VGVNGFGR                            | 5   | 8  | 5  | 40.12  | y2y4y5*y5y7                                                                      | 805.43  | 39.002  | 8301   | 1 | 805.43  | 4.09   |
| P04406 G3P_HUMAN Glycerlaldehyde-3-phosphate dehydrogenase | 11 |                                             | VDIVAINDPFIDLNYVMFQYDSTHGK          | 27  | 28 | 4  | 11.47  | b3b6y8y28                                                                        | 3308.56 | 125.220 | 6393   | 3 | 1103.52 | -1.84  |
| P04406 G3P_HUMAN Glycerlaldehyde-3-phosphate dehydrogenase | 12 |                                             | VVDLMAHMASK                         | 323 | 11 | 5  | 23.63  | b9y2y8°y8y10                                                                     | 1201.60 | 39.408  | 2799   | 2 | 601.30  | -8.33  |
| P04406 G3P_HUMAN Glycerlaldehyde-3-phosphate dehydrogenase | 13 |                                             | VIPELNGK                            | 219 | 8  | 4  | 40.12  | y4y5y6*y6                                                                        | 869.49  | 42.162  | 48681  | 2 | 435.25  | -18.60 |
| P04406 G3P_HUMAN Glycerlaldehyde-3-phosphate dehydrogenase | 14 |                                             | VIISAPSADAPMFVMGVNHEKYDNSLK         | 118 | 27 | 7  | 41.73  | b3y3y8y10y12y13y22                                                               | 2933.43 | 74.113  | 59160  | 4 | 734.11  | -9.24  |
| P04406 G3P_HUMAN Glycerlaldehyde-3-phosphate dehydrogenase | 15 |                                             | AENGKLVINGNPITIFQER                 | 61  | 19 | 3  | 14.47  | b9y6y9                                                                           | 2113.12 | 114.163 | 22459  | 3 | 705.04  | -10.86 |
| P04406 G3P_HUMAN Glycerlaldehyde-3-phosphate dehydrogenase | 16 | Carbamidomethyl+C(20)                       | LTGMAFRVPTANVSVVDLTCR               | 227 | 21 | 5  | 26.68  | b3°b3b14y4y5                                                                     | 2307.20 | 79.536  | 11639  | 3 | 769.74  | 0.53   |
| P04406 G3P_HUMAN Glycerlaldehyde-3-phosphate dehydrogenase | 17 |                                             | IKWGDAGAEYVVESTGVFTTMEK             | 84  | 23 | 3  | 12.68  | b11y7y11                                                                         | 2518.23 | 86.190  | 6300   | 3 | 840.08  | 4.46   |
| P04406 G3P_HUMAN Glycerlaldehyde-3-phosphate dehydrogenase | 18 |                                             | AAFNSGKVDIVAINDPFIDLNYVMYMFQYDSTHGK | 20  | 35 | 6  | 25.25  | y3y5°y5y6°y6y8                                                                   | 3983.85 | 118.991 | 5221   | 4 | 996.72  | -11.21 |
| P04406 G3P_HUMAN Glycerlaldehyde-3-phosphate dehydrogenase | 19 | Carbamidomethyl+C(13);Phosphoryl STY(3)     | VPTANVSVVDLTCR                      | 234 | 14 | 8  | 49.27  | b4b5b9b12y3y11°y11*y11                                                           | 1610.74 | 106.059 | 221437 | 2 | 805.88  | -4.32  |

|                                                           |    |                       |                                   |     |    |    |        |                                                                          |         |         |         |   |         |        |
|-----------------------------------------------------------|----|-----------------------|-----------------------------------|-----|----|----|--------|--------------------------------------------------------------------------|---------|---------|---------|---|---------|--------|
| P04406 G3P_HUMAN Glyceraldehyde-3-phosphate dehydrogenase | 20 | Oxidation+M()         | VIISAPSADAPMFVMGVNHEK             | 118 | 21 | 4  | 13.46  | b8y3y8*y8                                                                | 2229.09 | 36.862  | 286130  | 4 | 558.03  | -8.21  |
| P04406 G3P_HUMAN Glyceraldehyde-3-phosphate dehydrogenase | 21 | Oxidation+M(5)        | VVDLMAHMASKE                      | 323 | 12 | 3  | 21.63  | b6y5y10                                                                  | 1346.63 | 31.973  | 27182   | 2 | 673.82  | -9.97  |
| P04406 G3P_HUMAN Glyceraldehyde-3-phosphate dehydrogenase | 22 | Oxidation+M(5)        | VVDLMAHMASK                       | 323 | 11 | 5  | 49.51  | b7b8y5y9y10                                                              | 1217.61 | 62.957  | 7518    | 2 | 609.31  | 7.82   |
| P04406 G3P_HUMAN Glyceraldehyde-3-phosphate dehydrogenase | 23 |                       | GALQNIIPASTG                      | 200 | 12 | 0  | 4.3    |                                                                          | 1141.61 | 59.642  | 49713   | 2 | 571.31  | -11.44 |
| P04406 G3P_HUMAN Glyceraldehyde-3-phosphate dehydrogenase | 24 |                       | VIISAPSADAPMFVMGVNHEK             | 118 | 21 | 0  | 6.88   |                                                                          | 2195.09 | 75.062  | 1747    | 3 | 732.37  | -0.56  |
| Q562R1 ACTBL_HUMAN Beta-actin-like protein 2              | 1  |                       | SYELPDGQVITIGNER                  | 239 | 16 | 27 | 206.97 | b2b3*b3b6b8b9*b9b10b12*b12y3*y3y4*y4y5y6*y6y7y8y9y10y11*y11y12*y12y13y16 | 1790.90 | 70.748  | 2649301 | 2 | 895.95  | 2.39   |
| Q562R1 ACTBL_HUMAN Beta-actin-like protein 2              | 2  |                       | HQGVMVGMGQK                       | 40  | 11 | 21 | 157.89 | b1b2*b2b3b4*b4b5b7b10y3*y3y4*y4y5*y5y6y7y9y10*y10y11                     | 1171.58 | 32.471  | 377585  | 2 | 586.29  | 5.21   |
| Q562R1 ACTBL_HUMAN Beta-actin-like protein 2              | 3  |                       | LDLAGRDLTDYLMK                    | 178 | 14 | 10 | 57.72  | b2b11b12y1y2y3y4y5y10y14                                                 | 1623.82 | 77.988  | 165841  | 3 | 541.94  | -14.66 |
| Q562R1 ACTBL_HUMAN Beta-actin-like protein 2              | 4  |                       | IIAPPERK                          | 329 | 8  | 11 | 66     | b2y2y3*y3y4*y4y5*y6*y6y7y8                                               | 923.56  | 25.872  | 152293  | 2 | 462.28  | -9.19  |
| Q562R1 ACTBL_HUMAN Beta-actin-like protein 2              | 5  |                       | IIAPPER                           | 329 | 7  | 9  | 52.63  | y1y3*y3y4y5*y5y6*y6y7                                                    | 795.46  | 32.583  | 87502   | 2 | 398.24  | -10.51 |
| Q562R1 ACTBL_HUMAN Beta-actin-like protein 2              | 6  | Carbamidomethyl+C(1)  | CDVDIRK                           | 285 | 7  | 16 | 91.46  | b1b2*b2b3*b3b4*b4b6y1y2y3y4*y4y5y6y7                                     | 905.45  | 21.695  | 75530   | 2 | 453.23  | -5.93  |
| Q562R1 ACTBL_HUMAN Beta-actin-like protein 2              | 7  |                       | YSVWIGGSILASLSTFQMQWISK           | 337 | 23 | 10 | 30.44  | b2b4b7b9y1y2y4y7y12y23                                                   | 2602.34 | 136.475 | 9094    | 3 | 868.12  | 2.63   |
| Q562R1 ACTBL_HUMAN Beta-actin-like protein 2              | 8  |                       | IWYHTFYNELR                       | 85  | 11 | 7  | 37.36  | b7*b7b8y2y5*y5y8                                                         | 1541.75 | 110.642 | 6038    | 2 | 771.38  | -3.01  |
| Q562R1 ACTBL_HUMAN Beta-actin-like protein 2              | 9  |                       | DLTDYLMK                          | 184 | 8  | 3  | 35.35  | b4y3y7                                                                   | 998.48  | 70.131  | 285391  | 2 | 499.75  | -3.24  |
| Q562R1 ACTBL_HUMAN Beta-actin-like protein 2              | 10 |                       | YPIEHGVVTNWDDMEK                  | 69  | 16 | 4  | 16.61  | b6y8y13*y13                                                              | 1932.85 | 53.921  | 30049   | 2 | 966.93  | -17.43 |
| Q562R1 ACTBL_HUMAN Beta-actin-like protein 2              | 11 | Carbamidomethyl+C(17) | TDNELSALVVDNGSGMCK                | 1   | 18 | 3  | 15.09  | b16y3y13                                                                 | 1909.82 | 70.014  | 14300   | 2 | 955.41  | -21.22 |
| Q562R1 ACTBL_HUMAN Beta-actin-like protein 2              | 12 |                       | MTQIMFEAFNTPAMYVAIQAVLS<br>LYASGR | 119 | 29 | 4  | 17.28  | b4b10b12*b12                                                             | 3223.56 | 76.427  | 6291    | 4 | 806.65  | -10.91 |
| Q562R1 ACTBL_HUMAN Beta-actin-like protein 2              | 13 |                       | GVLTLK                            | 63  | 6  | 1  | 13.37  | y5                                                                       | 630.41  | 42.904  | 3163    | 1 | 630.41  | -6.68  |
| Q562R1 ACTBL_HUMAN Beta-actin-like protein 2              | 14 | Carbamidomethyl+C(2)  | LCYVALDFEQEMVR                    | 216 | 14 | 5  | 38.67  | b3b5b9y5y11                                                              | 1772.80 | 106.008 | 2192    | 3 | 591.60  | -21.14 |
| Q562R1 ACTBL_HUMAN Beta-actin-like protein 2              | 15 |                       | AAASSSPER                         | 230 | 9  | 3  | 29.76  | b6y4y7                                                                   | 875.41  | 47.053  | 1985    | 2 | 438.21  | -10.95 |
| Q562R1 ACTBL_HUMAN Beta-actin-like protein 2              | 16 |                       | IKIIAPPER                         | 327 | 9  | 4  | 44.46  | b5y3y4y5                                                                 | 1036.65 | 43.491  | 39222   | 2 | 518.83  | 1.53   |
| Q562R1 ACTBL_HUMAN Beta-actin-like protein 2              | 17 |                       | DLYANTVLSGGSTMYPGIADRMQ<br>K      | 292 | 24 | 12 | 46.86  | b9*b9b11b14b23y7*y7y11*y11y12y15*y15                                     | 2588.22 | 68.808  | 35976   | 3 | 863.41  | -9.62  |
| Q562R1 ACTBL_HUMAN Beta-actin-like protein 2              | 18 | Carbamidomethyl+C(2)  | LCYVALDFEQEMVRAAASSSPER           | 216 | 23 | 6  | 50.25  | b10y3y7y8y9y10                                                           | 2629.21 | 136.363 | 6940    | 2 | 1315.11 | -11.42 |

|                                               |    |                                            |                                  |     |    |    |        |                                                                    |         |         |        |   |         |        |
|-----------------------------------------------|----|--------------------------------------------|----------------------------------|-----|----|----|--------|--------------------------------------------------------------------|---------|---------|--------|---|---------|--------|
| [Q562R1 ACTBL_HUMAN Beta-actin-like protein 2 | 19 |                                            | YPIEHGVVTNWDDMEKIWHYHTFY NELR    | 69  | 27 | 5  | 26.6   | b5b6b15b18*b18                                                     | 3455.64 | 72.995  | 3456   | 4 | 864.67  | 8.20   |
| [Q562R1 ACTBL_HUMAN Beta-actin-like protein 2 | 20 |                                            | AGFGGDDAPRAVFPMSIGRPR            | 19  | 21 | 3  | 13.46  | b5b14y4                                                            | 2174.06 | 117.971 | 1521   | 3 | 725.36  | -12.91 |
| [Q562R1 ACTBL_HUMAN Beta-actin-like protein 2 | 21 | Phosphoryl.STY(4)                          | EIITLAPSTMK                      | 316 | 11 | 3  | 23.63  | b6_H3PO4 b6y6y9                                                    | 1283.61 | 90.820  | 2221   | 2 | 642.31  | -10.46 |
| [Q562R1 ACTBL_HUMAN Beta-actin-like protein 2 | 22 | Carbamidomethyl+C(2); Oxidation+M(12)      | LCYVALDFEQEMVR                   | 216 | 14 | 4  | 18.69  | b5b10°b10y6                                                        | 1788.80 | 90.056  | 42152  | 2 | 894.91  | -14.47 |
| [Q562R1 ACTBL_HUMAN Beta-actin-like protein 2 | 23 | Oxidation+M(1)                             | MQKEIITLAPSTMK                   | 313 | 14 | 4  | 18.69  | b3b6y5°y5                                                          | 1606.87 | 58.244  | 26474  | 3 | 536.29  | 8.96   |
| [Q562R1 ACTBL_HUMAN Beta-actin-like protein 2 | 24 | Oxidation+M(15)                            | KDLYANTVLSGGSTMYPGIADR           | 291 | 22 | 4  | 13.05  | b7y3y13°y13                                                        | 2345.14 | 81.461  | 2648   | 3 | 782.38  | -3.33  |
| [P68366 TBA4A_HUMAN Tubulin alpha-4A chain    | 1  |                                            | VGINYQPPTVVPGGDLAK               | 352 | 18 | 14 | 58.01  | b3b5*b5b6*b6b11°b11y1y2y3y7y8y12y18                                | 1824.98 | 65.287  | 217298 | 2 | 913.00  | -0.33  |
| [P68366 TBA4A_HUMAN Tubulin alpha-4A chain    | 2  |                                            | QLFHPEQLITGKEDAANNYAR            | 84  | 21 | 16 | 83.17  | b2b4*b4b5b6*b6b10y3y5*y5y6y7*y7y9y12y21                            | 2415.20 | 61.492  | 170806 | 3 | 805.74  | -0.51  |
| [P68366 TBA4A_HUMAN Tubulin alpha-4A chain    | 3  | Carbamidomethyl+C(8)                       | SIQFVDWCPTGFK                    | 339 | 13 | 24 | 179.86 | b3b4b5°b5b6*b6b7°b7*b7b12y2y3y5°y5y6°y6y7°y7y8y9°y9y10y12y13       | 1584.76 | 82.130  | 138460 | 2 | 792.88  | 2.31   |
| [P68366 TBA4A_HUMAN Tubulin alpha-4A chain    | 4  |                                            | AVFVDLEPTVIDEIR                  | 64  | 15 | 26 | 229.48 | b2b3b4b5°b5b6b7b10°b10b11b12y2y3°y3y4°y4y5y7y8y9°y9y10y11y12y13y15 | 1715.92 | 88.475  | 124267 | 2 | 858.47  | 1.78   |
| [P68366 TBA4A_HUMAN Tubulin alpha-4A chain    | 5  |                                            | NLDIERPTYTNLNR                   | 215 | 14 | 13 | 71.12  | b2°b2b3°b3y2y3y4*y4y6y7y8y12y14                                    | 1718.87 | 52.276  | 109813 | 3 | 573.63  | -9.73  |
| [P68366 TBA4A_HUMAN Tubulin alpha-4A chain    | 6  | Carbamidomethyl+C(3)                       | AVCMLSNTTAIAEAWAR                | 373 | 17 | 7  | 48.39  | b8b9y10y11°y11y13y15                                               | 1864.91 | 83.499  | 94580  | 2 | 932.96  | 1.31   |
| [P68366 TBA4A_HUMAN Tubulin alpha-4A chain    | 7  |                                            | EIIDPVLDR                        | 112 | 9  | 4  | 37.54  | y5y6y7y9                                                           | 1069.59 | 59.334  | 80061  | 2 | 535.30  | 0.34   |
| [P68366 TBA4A_HUMAN Tubulin alpha-4A chain    | 8  | Carbamidomethyl+C(15)                      | AYHEQLSVAEITNACFEPANQMV K        | 280 | 24 | 9  | 53.84  | b10b14y4y9y11y12y13°y13y17                                         | 2750.30 | 72.865  | 53972  | 3 | 917.44  | 3.99   |
| [P68366 TBA4A_HUMAN Tubulin alpha-4A chain    | 9  |                                            | LISQIVSSITASLR                   | 229 | 14 | 5  | 18.69  | b4y2y5y8y14                                                        | 1487.88 | 100.286 | 51813  | 2 | 744.44  | -2.13  |
| [P68366 TBA4A_HUMAN Tubulin alpha-4A chain    | 10 | Carbamidomethyl+C(4); Carbamidomethyl+C(5) | YMACCLLYR                        | 311 | 9  | 5  | 29.76  | b2b3y5y7y9                                                         | 1249.56 | 60.691  | 43718  | 2 | 625.28  | 4.01   |
| [P68366 TBA4A_HUMAN Tubulin alpha-4A chain    | 11 |                                            | LSVDYGKK                         | 156 | 8  | 10 | 66     | b2°b2y2y3y4y5y6°y6y7y8                                             | 909.50  | 28.699  | 36993  | 2 | 455.25  | -3.22  |
| [P68366 TBA4A_HUMAN Tubulin alpha-4A chain    | 12 |                                            | FDGALNVDLTEFQTNLVPYPR            | 243 | 21 | 12 | 66.62  | b2°b2b3b4b5b12b13y2y4y5y12y21                                      | 2409.22 | 94.359  | 27498  | 2 | 1205.12 | 6.49   |
| [P68366 TBA4A_HUMAN Tubulin alpha-4A chain    | 13 | Carbamidomethyl+C(5)                       | LSDQCTGLQGFLVFHSPGGTGS GFTSLLMER | 124 | 32 | 6  | 23.89  | b6b11y3y5y11y23                                                    | 3406.61 | 104.640 | 8116   | 3 | 1136.21 | -1.58  |
| [P68366 TBA4A_HUMAN Tubulin alpha-4A chain    | 14 |                                            | GHYTIGK                          | 105 | 7  | 5  | 39.69  | b4°b4b6y6y7                                                        | 775.41  | 26.580  | 7470   | 2 | 388.21  | 5.67   |
| [P68366 TBA4A_HUMAN Tubulin alpha-4A chain    | 15 | Carbamidomethyl+C(14)                      | TIGGGDDSFTEFFCETGAGKHVPR         | 40  | 24 | 5  | 27.5   | b4b6b9b12y4                                                        | 2557.17 | 71.854  | 14320  | 4 | 640.05  | -2.48  |
| [P68366 TBA4A_HUMAN Tubulin alpha-4A chain    | 16 | Carbamidomethyl+C(9)                       | RSIQFVDWCPTGFK                   | 338 | 14 | 4  | 18.69  | b11y4y10°y10                                                       | 1740.83 | 97.352  | 3184   | 3 | 580.95  | -11.78 |
| [P68366 TBA4A_HUMAN Tubulin alpha-4A chain    | 17 | Carbamidomethyl+C(5)                       | LSDQCTGLQGFLVFHS                 | 124 | 16 | 0  | 11.62  |                                                                    | 1808.86 | 104.671 | 21746  | 2 | 904.93  | -3.98  |
| [P68366 TBA4A_HUMAN Tubulin alpha-4A chain    | 18 |                                            | EIIDPVLDR                        | 112 | 9  | 0  | 1.72   |                                                                    | 1051.57 | 59.337  | 6813   | 2 | 526.29  | -3.95  |
| [P68366 TBA4A_HUMAN Tubulin alpha-4A chain    | 19 |                                            | AVFVDLEPTVIDEIR                  | 64  | 15 | 0  | 4.3    |                                                                    | 1697.88 | 88.478  | 2275   | 3 | 566.63  | -14.02 |

|                                                         |    |                       |                                 |      |    |    |        |                                                                                  |         |         |        |   |         |        |
|---------------------------------------------------------|----|-----------------------|---------------------------------|------|----|----|--------|----------------------------------------------------------------------------------|---------|---------|--------|---|---------|--------|
| [P19105]MRLC3_HUMAN Myosin regulatory light chain MRLC3 | 1  |                       | LNGTDPEDVIR                     | 92   | 11 | 11 | 85.4   | b4y1y3y4y5 <sup>°</sup> y5y6y8y9 <sup>°</sup> y9y11                              | 1228.62 | 48.404  | 143043 | 2 | 614.81  | -0.50  |
| [P19105]MRLC3_HUMAN Myosin regulatory light chain MRLC3 | 2  |                       | GNFNYIEFTR                      | 150  | 10 | 12 | 110.85 | b2*b2b3b5b6y3y4y5y6y7y8y10                                                       | 1260.60 | 66.624  | 92867  | 2 | 630.80  | -2.42  |
| [P19105]MRLC3_HUMAN Myosin regulatory light chain MRLC3 | 3  |                       | ATSNVFAMFDQSQIQEFK              | 16   | 18 | 13 | 83.67  | b2b5b14y2y3y4*y4y5y9y10y12y13y18                                                 | 2091.00 | 89.442  | 84529  | 2 | 1046.00 | 6.31   |
| [P19105]MRLC3_HUMAN Myosin regulatory light chain MRLC3 | 4  |                       | FTDEEVDLYR                      | 132  | 11 | 9  | 51.73  | b3y2y5y7y8 <sup>°</sup> y8y9y10 <sup>°</sup> y11                                 | 1415.64 | 58.971  | 60388  | 2 | 708.32  | 5.78   |
| [P19105]MRLC3_HUMAN Myosin regulatory light chain MRLC3 | 5  |                       | ELLTTMGDR                       | 123  | 9  | 5  | 53.49  | y3y5y6y7y9                                                                       | 1035.51 | 48.441  | 27852  | 2 | 518.26  | -6.01  |
| [P19105]MRLC3_HUMAN Myosin regulatory light chain MRLC3 | 6  |                       | NPTDEYLDAMMNEAPGPINFMTFLTMTFGEK | 62   | 30 | 8  | 37.36  | b4b11 <sup>b</sup> 11y4y5y6y10 <sup>°</sup> y10                                  | 3424.47 | 40.170  | 3213   | 4 | 856.87  | -14.69 |
| [P19105]MRLC3_HUMAN Myosin regulatory light chain MRLC3 | 7  |                       | EAFNMIDQNRDGFIDK                | 34   | 16 | 4  | 34.25  | b3b12b14b15                                                                      | 1912.86 | 53.730  | 216627 | 4 | 478.97  | -11.81 |
| [P19105]MRLC3_HUMAN Myosin regulatory light chain MRLC3 | 8  |                       | ELLTTMGDRFTDEEVDLYR             | 123  | 20 | 8  | 36.32  | b7b11 <sup>b</sup> 11y4 <sup>°</sup> y4y5y11y14                                  | 2432.13 | 78.950  | 79495  | 3 | 811.38  | 2.21   |
| [P19105]MRLC3_HUMAN Myosin regulatory light chain MRLC3 | 9  | Carbamidomethyl+C(16) | LNGTDPEDVIRNAFACFDEEATGTIQEDYLR | 92   | 31 | 3  | 11.09  | b6y4y14                                                                          | 3559.63 | 101.792 | 3344   | 3 | 1187.21 | -0.27  |
| [P19105]MRLC3_HUMAN Myosin regulatory light chain MRLC3 | 10 |                       | DGFIDKEDLHDMLASLGK              | 44   | 18 | 3  | 22.25  | b3b5b10                                                                          | 2003.97 | 62.961  | 2504   | 3 | 668.66  | -2.86  |
| [O14950]MRLC2_HUMAN Myosin regulatory light chain MRLC2 | 1  |                       | LNGTDPEDVIR                     | 93   | 11 | 11 | 85.4   | b4y1y3y4y5 <sup>°</sup> y5y6y8y9 <sup>°</sup> y9y11                              | 1228.62 | 48.404  | 143043 | 2 | 614.81  | -0.50  |
| [O14950]MRLC2_HUMAN Myosin regulatory light chain MRLC2 | 2  |                       | GNFNYIEFTR                      | 151  | 10 | 12 | 110.85 | b2*b2b3b5b6y3y4y5y6y7y8y10                                                       | 1260.60 | 66.624  | 92867  | 2 | 630.80  | -2.42  |
| [O14950]MRLC2_HUMAN Myosin regulatory light chain MRLC2 | 3  |                       | ATSNVFAMFDQSQIQEFK              | 17   | 18 | 13 | 83.67  | b2b5b14y2y3y4*y4y5y9y10y12y13y18                                                 | 2091.00 | 89.442  | 84529  | 2 | 1046.00 | 6.31   |
| [O14950]MRLC2_HUMAN Myosin regulatory light chain MRLC2 | 4  |                       | FTDEEVDLYR                      | 133  | 11 | 9  | 51.73  | b3y2y5y7y8 <sup>°</sup> y8y9y10 <sup>°</sup> y11                                 | 1415.64 | 58.971  | 60388  | 2 | 708.32  | 5.78   |
| [O14950]MRLC2_HUMAN Myosin regulatory light chain MRLC2 | 5  |                       | ELLTTMGDR                       | 124  | 9  | 5  | 53.49  | y3y5y6y7y9                                                                       | 1035.51 | 48.441  | 27852  | 2 | 518.26  | -6.01  |
| [O14950]MRLC2_HUMAN Myosin regulatory light chain MRLC2 | 6  |                       | NPTDAYLDAMMNEAPGPINFMTFLTMTFGEK | 63   | 30 | 6  | 24.32  | b10 <sup>b</sup> 10b11y3 <sup>°</sup> y3y20                                      | 3366.56 | 136.412 | 1615   | 3 | 1122.86 | 12.40  |
| [O14950]MRLC2_HUMAN Myosin regulatory light chain MRLC2 | 7  | Oxidation+M()         | NPTDAYLDAMMNEAPGPINFMTFLTMTFGEK | 63   | 30 | 3  | 11.2   | b13y12y22                                                                        | 3382.49 | 102.092 | 4960   | 3 | 1128.17 | -6.21  |
| [P35579]MYH9_HUMAN Myosin-9                             | 1  |                       | IAEFTTNLTETEEEK                 | 1000 | 14 | 16 | 154.34 | b3b9b10b13y3 <sup>°</sup> y3y4y6y7y8y10y11y12 <sup>°</sup> y12y13y14             | 1653.79 | 56.959  | 261415 | 2 | 827.40  | 3.17   |
| [P35579]MYH9_HUMAN Myosin-9                             | 2  |                       | IAQLEEQLDNETK                   | 1815 | 13 | 14 | 115.08 | b2b3b4b10b11y5y6y9y10 <sup>°</sup> y10y11y12y13*y13                              | 1530.77 | 51.206  | 215409 | 2 | 765.89  | 2.55   |
| [P35579]MYH9_HUMAN Myosin-9                             | 3  |                       | LQQLDDLLVLDLHQR                 | 1417 | 16 | 23 | 151.4  | b2*b2b3b4*b4b8y1y3*y3y4y5 <sup>°</sup> y5y6*y6y7*y7y8y11y12y13y14*y14y16         | 1949.98 | 85.231  | 199744 | 3 | 650.66  | -7.01  |
| [P35579]MYH9_HUMAN Myosin-9                             | 4  |                       | QLLQANPILEAFGNAK                | 209  | 16 | 26 | 154.41 | b2*b2b3*b3b4*b4b6*b6b16y1y2y4*y4y5y6y7 <sup>°</sup> y7*y7y8*y8y10y11y12y13y14y16 | 1726.95 | 90.793  | 175864 | 2 | 863.98  | 0.92   |
| [P35579]MYH9_HUMAN Myosin-9                             | 5  |                       | HSQAVEELAEQLEQTKR               | 1193 | 17 | 6  | 26.6   | b7y2y3y4*y4y9                                                                    | 1996.01 | 60.804  | 155905 | 3 | 666.01  | 0.73   |
| [P35579]MYH9_HUMAN Myosin-9                             | 6  |                       | IMGPEEQMGLLR                    | 327  | 14 | 8  | 43.32  | b2b3b4y9y10y12 <sup>°</sup> y12y14                                               | 1615.82 | 77.452  | 155072 | 2 | 808.41  | 0.76   |
| [P35579]MYH9_HUMAN Myosin-9                             | 7  |                       | IIGLDQVAGMSETALPGAFK            | 617  | 20 | 9  | 57.05  | b2b3b15y2y3y5y6y7y8                                                              | 2018.07 | 89.505  | 150932 | 2 | 1009.54 | 3.81   |
| [P35579]MYH9_HUMAN Myosin-9                             | 8  |                       | IAQLEEEEEEQGNTELINDR            | 1730 | 21 | 12 | 94.16  | b3b10b11y2y3y4y5y6y7y10y11y21                                                    | 2472.17 | 70.344  | 150600 | 3 | 824.73  | -0.20  |

|                            |    |                       |                       |      |    |    |        |                                                                                                                                                          |         |        |        |   |         |        |
|----------------------------|----|-----------------------|-----------------------|------|----|----|--------|----------------------------------------------------------------------------------------------------------------------------------------------------------|---------|--------|--------|---|---------|--------|
| P35579 MYH9_HUMAN Myosin-9 | 9  |                       | DELADEIANSSGK         | 1703 | 13 | 11 | 81.42  | b2b3b4b12y2y3y4 <sup>o</sup> y4y5y6y9                                                                                                                    | 1348.62 | 49.206 | 138060 | 2 | 674.81  | -0.09  |
| P35579 MYH9_HUMAN Myosin-9 | 10 |                       | DFSALESQLQDTQELLQEENR | 1301 | 21 | 18 | 87.43  | b2b3 <sup>o</sup> b3b4 <sup>o</sup> b4b5b14 <sup>o</sup> b14 <sup>o</sup> *b14y2y3 <sup>o</sup> y3y4y5 <sup>o</sup> y5y6y8y12                            | 2493.17 | 91.211 | 137627 | 3 | 831.73  | -2.55  |
| P35579 MYH9_HUMAN Myosin-9 | 11 |                       | ELESQISELQEDLESER     | 1107 | 17 | 21 | 153.31 | b2b5 <sup>o</sup> b5b7b8 <sup>o</sup> b8b13b14y3y5y6 <sup>o</sup> y6y8 <sup>o</sup> y8y9y11y12 <sup>o</sup> y12y13y14y17                                 | 2033.97 | 78.993 | 136713 | 2 | 1017.49 | 9.30   |
| P35579 MYH9_HUMAN Myosin-9 | 12 |                       | ALEQQVEEMK            | 1528 | 10 | 13 | 72.82  | b2b3y1y2y3y4 <sup>o</sup> y4y6 <sup>o</sup> y6y7 <sup>o</sup> y7y8y10                                                                                    | 1204.59 | 45.415 | 135491 | 2 | 602.80  | 0.81   |
| P35579 MYH9_HUMAN Myosin-9 | 13 |                       | LDPHLVLDQLR           | 682  | 11 | 8  | 80.24  | y3y4 <sup>o</sup> y4y5y6y7y9y11                                                                                                                          | 1318.75 | 70.756 | 123603 | 2 | 659.88  | -1.57  |
| P35579 MYH9_HUMAN Myosin-9 | 14 |                       | ANLQIDQINTDLNLER      | 1754 | 16 | 23 | 141.98 | b2b3 <sup>o</sup> b3b4 <sup>o</sup> b4b6b7 <sup>o</sup> b7b15y2y3y4 <sup>o</sup> y4y6 <sup>o</sup> y6y8y10 <sup>o</sup> y10y11y12y13 <sup>o</sup> y13y16 | 1869.97 | 71.813 | 112158 | 2 | 935.49  | 3.07   |
| P35579 MYH9_HUMAN Myosin-9 | 15 | Carbamidomethyl+C(9)  | VEDMAELTCLNEASVLHNLK  | 82   | 20 | 14 | 67.23  | b2b3b20y2y4 <sup>o</sup> y4y5y11y13 <sup>o</sup> y13y15y16y18y20                                                                                         | 2286.10 | 79.248 | 111332 | 3 | 762.71  | -2.78  |
| P35579 MYH9_HUMAN Myosin-9 | 16 |                       | LQVELDNVTGLLSQSDSK    | 1277 | 18 | 14 | 88.06  | b2 <sup>o</sup> b2b4b5 <sup>o</sup> b5y4y6 <sup>o</sup> y6y7y13y14y15y16y18                                                                              | 1946.02 | 80.569 | 109655 | 2 | 973.51  | 5.02   |
| P35579 MYH9_HUMAN Myosin-9 | 17 |                       | VEAQLQELQVK           | 1249 | 11 | 14 | 130.24 | b2b3b4b9b10y2y3 <sup>o</sup> y3y4y5y7y8y9y11                                                                                                             | 1284.71 | 52.958 | 108908 | 2 | 642.86  | -3.61  |
| P35579 MYH9_HUMAN Myosin-9 | 18 |                       | ASITALEAK             | 1806 | 9  | 9  | 37.54  | b1b2 <sup>o</sup> b2y2y5 <sup>o</sup> y5y6y8y9                                                                                                           | 903.51  | 41.679 | 105113 | 2 | 452.26  | -8.85  |
| P35579 MYH9_HUMAN Myosin-9 | 19 |                       | VVFQEFR               | 711  | 7  | 10 | 62.56  | b6y1y2y3y4 <sup>o</sup> y4 <sup>o</sup> y4y5y6y7                                                                                                         | 924.49  | 55.502 | 100518 | 2 | 462.75  | -6.27  |
| P35579 MYH9_HUMAN Myosin-9 | 20 |                       | EEILAQAK              | 1661 | 8  | 3  | 40.12  | y4y5y6                                                                                                                                                   | 901.49  | 34.232 | 92599  | 2 | 451.25  | -5.69  |
| P35579 MYH9_HUMAN Myosin-9 | 21 |                       | LQEMEGTVK             | 1793 | 9  | 5  | 37.54  | y2y3y6y7y9                                                                                                                                               | 1034.52 | 31.901 | 86903  | 2 | 517.76  | 3.78   |
| P35579 MYH9_HUMAN Myosin-9 | 22 |                       | TQLEELEDELQATEDAK     | 1538 | 17 | 7  | 52.39  | y2y4y5y6y13y14y17                                                                                                                                        | 1961.93 | 78.396 | 85898  | 2 | 981.47  | 4.79   |
| P35579 MYH9_HUMAN Myosin-9 | 23 |                       | ALELDSNLYR            | 745  | 10 | 10 | 59.87  | b2b8y2y3y5y6y8 <sup>o</sup> y8 <sup>o</sup> y8y10                                                                                                        | 1193.62 | 59.570 | 83432  | 2 | 597.31  | 2.86   |
| P35579 MYH9_HUMAN Myosin-9 | 24 |                       | MQQNIQELEEQLLEESAR    | 940  | 19 | 16 | 142.41 | b4b5b6b7b8b11y2y4y5y7y8y9y13y14y17y19                                                                                                                    | 2333.08 | 74.612 | 83195  | 2 | 1167.04 | 8.37   |
| P35579 MYH9_HUMAN Myosin-9 | 25 |                       | LEVNQLQAMK            | 1557 | 9  | 8  | 66.43  | b2y1y4 <sup>o</sup> y4y5y6y7y8                                                                                                                           | 1045.57 | 57.741 | 81461  | 2 | 523.29  | -1.87  |
| P35579 MYH9_HUMAN Myosin-9 | 26 |                       | KEELQAALAR            | 1080 | 11 | 6  | 65.53  | b6y3y5y7y10y11                                                                                                                                           | 1257.68 | 42.097 | 79629  | 2 | 629.34  | 1.26   |
| P35579 MYH9_HUMAN Myosin-9 | 27 |                       | ELEDATETADAMNR        | 1898 | 14 | 11 | 90.09  | b9y2y3y4y6y9y10 <sup>o</sup> y10y11y12y14                                                                                                                | 1565.68 | 42.871 | 78842  | 2 | 783.35  | 5.30   |
| P35579 MYH9_HUMAN Myosin-9 | 28 |                       | YEILTPNSIPK           | 720  | 11 | 6  | 35.78  | b2b10y6y8y9y11                                                                                                                                           | 1274.70 | 62.075 | 77970  | 2 | 637.85  | 0.29   |
| P35579 MYH9_HUMAN Myosin-9 | 29 |                       | TEMEDLMSSKDDVVGK      | 1503 | 15 | 13 | 93.3   | b2 <sup>o</sup> b2b10b12b13y3y4y5y8 <sup>o</sup> y8y9y10y15                                                                                              | 1684.73 | 50.866 | 77677  | 3 | 562.25  | -7.46  |
| P35579 MYH9_HUMAN Myosin-9 | 30 |                       | VSHLLGINVTDFTFR       | 373  | 14 | 12 | 103.54 | b5b6y3y4 <sup>o</sup> y4y5 <sup>o</sup> y5y6y7y9y10y14                                                                                                   | 1571.84 | 74.505 | 76994  | 3 | 524.62  | -9.32  |
| P35579 MYH9_HUMAN Myosin-9 | 31 | Carbamidomethyl+C(4)  | ADFCIIHYAGK           | 565  | 11 | 9  | 92.32  | b3b7b8y3y4y5y7y8y11                                                                                                                                      | 1294.62 | 58.484 | 76860  | 2 | 647.81  | -2.73  |
| P35579 MYH9_HUMAN Myosin-9 | 32 | Carbamidomethyl+C(13) | LEEEQIILEDQNCK        | 975  | 14 | 9  | 66.99  | b3b6y1y4y5y7y8y9y14                                                                                                                                      | 1760.84 | 54.719 | 73015  | 2 | 880.92  | 2.36   |
| P35579 MYH9_HUMAN Myosin-9 | 33 |                       | NFINNPLAQADWAAK       | 14   | 15 | 7  | 54.18  | b6y6y7y8y10y14y15                                                                                                                                        | 1672.85 | 77.762 | 70254  | 2 | 836.93  | 1.09   |
| P35579 MYH9_HUMAN Myosin-9 | 34 |                       | QIATLHAQVADMK         | 1357 | 13 | 7  | 57.36  | y3y4y5y7y11y13 <sup>o</sup> y13                                                                                                                          | 1425.74 | 46.460 | 68243  | 3 | 475.92  | -5.48  |
| P35579 MYH9_HUMAN Myosin-9 | 35 |                       | VIQYLAYVASSHK         | 186  | 13 | 10 | 91.03  | b1y3y5 <sup>o</sup> y5y6y8y9y10y11y13                                                                                                                    | 1478.78 | 60.665 | 56220  | 3 | 493.60  | -11.80 |
| P35579 MYH9_HUMAN Myosin-9 | 36 |                       | AGVLAHLEEER           | 764  | 11 | 5  | 40.55  | b3y4y5y6y11                                                                                                                                              | 1223.63 | 49.421 | 44555  | 2 | 612.32  | -5.59  |



|                            |    |                                             |                       |      |    |    |        |                                                  |         |         |        |   |         |        |
|----------------------------|----|---------------------------------------------|-----------------------|------|----|----|--------|--------------------------------------------------|---------|---------|--------|---|---------|--------|
| P35579 MYH9_HUMAN Myosin-9 | 37 |                                             | QLEEEAQAQR            | 1877 | 11 | 7  | 80.24  | y3y4y5y6y7y9*y9                                  | 1331.61 | 28.847  | 44189  | 2 | 666.31  | 0.46   |
| P35579 MYH9_HUMAN Myosin-9 | 38 |                                             | NTDQASMPDNTAAQK       | 358  | 15 | 8  | 38.8   | b3y4y8*y8y10*y10y11y15                           | 1591.71 | 25.889  | 41438  | 2 | 796.36  | 2.68   |
| P35579 MYH9_HUMAN Myosin-9 | 39 |                                             | DLEAHIDSANK           | 1620 | 11 | 5  | 26.64  | b8y5*y5y6y11                                     | 1212.58 | 34.133  | 41384  | 2 | 606.80  | -1.01  |
| P35579 MYH9_HUMAN Myosin-9 | 40 |                                             | EEVGEEAIVLVENGKK      | 47   | 17 | 6  | 26.6   | b2b8y8y9y11y17                                   | 1871.94 | 75.132  | 39607  | 3 | 624.65  | -10.76 |
| P35579 MYH9_HUMAN Myosin-9 | 41 |                                             | EQEVNLIK              | 1165 | 9  | 5  | 53.49  | y2y3y4y5y7                                       | 1100.65 | 36.478  | 39528  | 2 | 550.83  | 14.53  |
| P35579 MYH9_HUMAN Myosin-9 | 42 |                                             | NLPIYSEEVEMYK         | 125  | 14 | 10 | 70.67  | b3b4y1y5*y5y8y9y10y12y14                         | 1727.87 | 81.508  | 38831  | 2 | 864.44  | 7.56   |
| P35579 MYH9_HUMAN Myosin-9 | 43 | Carbamidomethyl+C(1)                        | CNGVLEGR              | 693  | 9  | 6  | 53.49  | b2*b2y3y4y5y7                                    | 1017.51 | 48.410  | 37209  | 2 | 509.26  | -3.60  |
| P35579 MYH9_HUMAN Myosin-9 | 44 |                                             | THEAQIQEMR            | 1181 | 10 | 11 | 64.24  | b2b3*b3b4b8y2y4*y4y7y8y10                        | 1242.59 | 28.347  | 33567  | 2 | 621.80  | 1.57   |
| P35579 MYH9_HUMAN Myosin-9 | 45 |                                             | SMEAEMIQLEELAAER      | 1676 | 18 | 17 | 112.46 | b2b13*b13*b13b14*b14y2y3y4y5y6y8*y8y9*y9y10y11   | 2048.95 | 93.594  | 30886  | 3 | 683.66  | -5.60  |
| P35579 MYH9_HUMAN Myosin-9 | 46 | Carbamidomethyl+C(7)                        | MEDSVGCLETAEVK        | 1372 | 15 | 4  | 25.65  | y10y11y13y15                                     | 1696.76 | 53.492  | 30879  | 2 | 848.88  | 12.52  |
| P35579 MYH9_HUMAN Myosin-9 | 47 |                                             | TELEDTLSTAAQQLR       | 1145 | 17 | 4  | 23.2   | y3y9y12y17                                       | 1919.93 | 61.112  | 28351  | 2 | 960.47  | 5.53   |
| P35579 MYH9_HUMAN Myosin-9 | 48 |                                             | LEGDSTDLSQIAELQAIAELK | 1052 | 23 | 18 | 102.95 | b2b11*b11b13b14*b14b16b19y2y3*y3y4y5y6y7y8*y8y23 | 2487.26 | 101.337 | 22447  | 2 | 1244.13 | 5.01   |
| P35579 MYH9_HUMAN Myosin-9 | 49 |                                             | IAQLEEQDNETKER        | 1815 | 15 | 11 | 53.17  | b7*b7b9*b9y7y8y10y11*y11*y11y15                  | 1815.91 | 49.895  | 21990  | 2 | 908.46  | 3.29   |
| P35579 MYH9_HUMAN Myosin-9 | 50 |                                             | ADEWLMK               | 580  | 7  | 4  | 39.69  | y3y4y5y7                                         | 892.42  | 55.442  | 21939  | 2 | 446.72  | 0.21   |
| P35579 MYH9_HUMAN Myosin-9 | 51 | Carbamidomethyl+C(11);Carbamidomethyl+C(12) | ITDVIIFQACCR          | 778  | 13 | 3  | 29.26  | y5y9y12                                          | 1552.77 | 52.226  | 12710  | 3 | 518.26  | 5.58   |
| P35579 MYH9_HUMAN Myosin-9 | 52 |                                             | LTEMETLQSQLMAEK       | 867  | 15 | 13 | 52.2   | b2b4b7*b7b9*b9*b9b10*b10y7y8*y8y15               | 1751.87 | 103.216 | 5744   | 2 | 876.44  | 6.83   |
| P35579 MYH9_HUMAN Myosin-9 | 53 |                                             | LQRELEDATETADAMNR     | 1895 | 17 | 4  | 23.2   | b10*b10b13b15                                    | 1962.91 | 73.927  | 1524   | 2 | 981.96  | -2.30  |
| P35579 MYH9_HUMAN Myosin-9 | 54 | Carbamidomethyl+C(14)                       | LQLQEQLQAETELCAEAEELR | 882  | 21 | 3  | 13.46  | b6b10y16                                         | 2501.21 | 80.862  | 116015 | 2 | 1251.11 | -2.73  |
| P35579 MYH9_HUMAN Myosin-9 | 55 |                                             | GALALEEK              | 1716 | 8  | 4  | 35.35  | b4b7*b7y4                                        | 830.45  | 37.596  | 34913  | 2 | 415.73  | -9.04  |
| P35579 MYH9_HUMAN Myosin-9 | 56 |                                             | TDLLLEPYNK            | 289  | 10 | 3  | 26.21  | b3y7y9                                           | 1205.64 | 61.459  | 29759  | 2 | 603.32  | -4.05  |
| P35579 MYH9_HUMAN Myosin-9 | 57 |                                             | EEVGEEAIVLVENGK       | 47   | 16 | 9  | 40.2   | b4*b4b9b15*b15*b15y4y5*y5                        | 1743.89 | 90.690  | 22114  | 2 | 872.45  | 11.62  |
| P35579 MYH9_HUMAN Myosin-9 | 58 |                                             | QAQQR                 | 1697 | 6  | 1  | 13.37  | y5                                               | 759.38  | 33.366  | 20292  | 2 | 380.19  | 7.39   |
| P35579 MYH9_HUMAN Myosin-9 | 59 |                                             | HSQAVEELAEQLEQTK      | 1193 | 16 | 3  | 23.15  | b6b7y8                                           | 1839.89 | 66.114  | 15760  | 3 | 613.97  | -11.61 |
| P35579 MYH9_HUMAN Myosin-9 | 60 |                                             | LMATLR                | 656  | 6  | 1  | 13.37  | y5                                               | 704.41  | 39.656  | 13783  | 2 | 352.71  | -5.63  |
| P35579 MYH9_HUMAN Myosin-9 | 61 |                                             | VTTEAK                | 966  | 6  | 1  | 13.37  | b4                                               | 648.36  | 31.474  | 10103  | 2 | 324.68  | 1.60   |
| P35579 MYH9_HUMAN Myosin-9 | 62 |                                             | GAGDGSDEEVDGK         | 1937 | 13 | 3  | 20.02  | b8y6y8                                           | 1235.49 | 42.242  | 9377   | 2 | 618.25  | -6.52  |
| P35579 MYH9_HUMAN Myosin-9 | 63 |                                             | NAEQYK                | 1856 | 6  | 2  | 13.37  | y5*y5                                            | 752.35  | 67.600  | 7352   | 1 | 752.35  | -9.82  |
| P35579 MYH9_HUMAN Myosin-9 | 64 |                                             | VAAAYDK               | 1404 | 6  | 1  | 13.37  | y3                                               | 666.35  | 50.277  | 5600   | 2 | 333.68  | 13.83  |
| P35579 MYH9_HUMAN Myosin-9 | 65 |                                             | ADGAEAKPAE            | 1950 | 10 | 7  | 56.07  | b5b6*b6b7y6*y6y7                                 | 958.43  | 91.224  | 4776   | 2 | 479.72  | -18.79 |
| P35579 MYH9_HUMAN Myosin-9 | 66 |                                             | ELDDTR                | 1652 | 6  | 1  | 13.37  | y4                                               | 748.34  | 35.813  | 4222   | 1 | 748.34  | -10.77 |
| P35579 MYH9_HUMAN Myosin-9 | 67 |                                             | HEAMITDLEER           | 1024 | 11 | 4  | 40.55  | b6y5y7y9                                         | 1343.64 | 62.298  | 3920   | 2 | 672.32  | 7.45   |
| P35579 MYH9_HUMAN Myosin-9 | 68 |                                             | MAQQAADK              | 0    | 8  | 3  | 35.35  | b5y5y7                                           | 862.41  | 86.356  | 3101   | 1 | 862.41  | 3.40   |
| P35579 MYH9_HUMAN Myosin-9 | 69 | Carbamidomethyl+C(7)                        | QELEEICHLEAR          | 910  | 13 | 4  | 20.02  | b4b10y9*y9                                       | 1641.75 | 80.701  | 2443   | 2 | 821.38  | -2.60  |
| P35579 MYH9_HUMAN Myosin-9 | 70 |                                             | DMFQETMEAMR           | 316  | 11 | 4  | 23.63  | b8y4*y4y6                                        | 1388.59 | 44.472  | 2196   | 3 | 463.53  | 16.97  |
| P35579 MYH9_HUMAN Myosin-9 | 71 |                                             | EQLLEEEAK             | 1342 | 10 | 3  | 26.21  | b4b7y8                                           | 1233.56 | 40.181  | 1768   | 1 | 1233.56 | 11.97  |
| P35579 MYH9_HUMAN Myosin-9 | 72 |                                             | VEEEAAQK              | 1091 | 8  | 5  | 35.35  | b3b7*b7y5*y5                                     | 903.45  | 53.675  | 1697   | 2 | 452.23  | 7.43   |
| P35579 MYH9_HUMAN Myosin-9 | 73 |                                             | EQLLEEEAKHNLEK        | 1342 | 15 | 13 | 120.72 | b12y3y4y5y6y7*y7y8y10*y10y11*y11y13              | 1854.86 | 34.563  | 158678 | 3 | 618.96  | -5.40  |
| P35579 MYH9_HUMAN Myosin-9 | 74 | Carbamidomethyl+C(8)                        | KQELEEICHLEAR         | 909  | 14 | 4  | 40.87  | y5y6y7y11                                        | 1769.84 | 56.136  | 111615 | 3 | 590.62  | -4.83  |

|                            |     |                       |                                        |      |    |    |        |                                                                              |         |         |        |   |         |        |
|----------------------------|-----|-----------------------|----------------------------------------|------|----|----|--------|------------------------------------------------------------------------------|---------|---------|--------|---|---------|--------|
| P35579 MYH9_HUMAN Myosin-9 | 75  | Carbamidomethyl+C(27) | RQGASFIGILDIAGFEIFDLNFSFEQL<br>CINYNEK | 441  | 34 | 5  | 39.13  | y3y4y10*y10y11                                                               | 3922.92 | 95.531  | 104056 | 3 | 1308.31 | -3.24  |
| P35579 MYH9_HUMAN Myosin-9 | 76  |                       | DLGEELEALKTELEDTLSTAAQQ<br>ELR         | 1135 | 27 | 23 | 121.54 | b3b4b8b9°b9b13b14b16<br>b21°b21y5°y5*y5y7*y7<br>y8*y8y9°y9y10°y10y11°<br>y11 | 3017.48 | 118.138 | 90456  | 3 | 1006.50 | 0.16   |
| P35579 MYH9_HUMAN Myosin-9 | 77  |                       | KLEGDSTDLSDQIAELQAQIAELK               | 1051 | 24 | 24 | 199.65 | b3°b3b6b7b8°b8b9b10b<br>12°b12b13°b13b14b21y<br>3°y3y4y5y6y7y8y9y11y<br>12   | 2615.34 | 96.669  | 86098  | 3 | 872.45  | -1.31  |
| P35579 MYH9_HUMAN Myosin-9 | 78  |                       | RGDLPFVVPR                             | 1922 | 10 | 6  | 73.78  | b3b4b6b7y4y5                                                                 | 1155.66 | 60.388  | 67134  | 2 | 578.34  | 0.53   |
| P35579 MYH9_HUMAN Myosin-9 | 79  |                       | KFDQLLAEK                              | 1444 | 10 | 3  | 26.21  | b5b8y8                                                                       | 1220.65 | 48.451  | 66968  | 2 | 610.83  | -2.50  |
| P35579 MYH9_HUMAN Myosin-9 | 80  |                       | FLSNHVTIPGQQDKDMFQETME<br>AMR          | 301  | 26 | 3  | 22.52  | y3y4y6                                                                       | 3010.38 | 76.395  | 64236  | 4 | 753.35  | -2.76  |
| P35579 MYH9_HUMAN Myosin-9 | 81  |                       | ELESQISELQEDLESERASR                   | 1107 | 20 | 3  | 13.93  | b3b7y11                                                                      | 2348.14 | 81.249  | 63123  | 3 | 783.39  | 9.36   |
| P35579 MYH9_HUMAN Myosin-9 | 82  |                       | RQLEEAEEEAQR                           | 1876 | 12 | 3  | 21.63  | b4b8y11                                                                      | 1487.71 | 54.797  | 44930  | 2 | 744.36  | -1.72  |
| P35579 MYH9_HUMAN Myosin-9 | 83  |                       | TELADKVTK                              | 1268 | 9  | 4  | 44.46  | b3y3y6y7                                                                     | 1004.55 | 25.388  | 44373  | 2 | 502.78  | -9.11  |
| P35579 MYH9_HUMAN Myosin-9 | 84  |                       | YLYVDKNFINNPLAQADWAAK                  | 8    | 21 | 6  | 44.3   | b9y3y4y8y10y11                                                               | 2454.25 | 82.597  | 41181  | 3 | 818.75  | 1.39   |
| P35579 MYH9_HUMAN Myosin-9 | 85  |                       | ALEQQVEEMKTQLEEELEDELQAT<br>EDAK       | 1528 | 27 | 6  | 17.24  | b5b10°b10b13°b13y11                                                          | 3147.49 | 104.435 | 36043  | 3 | 1049.84 | 1.16   |
| P35579 MYH9_HUMAN Myosin-9 | 86  |                       | AGKLDPHLVDQLR                          | 679  | 14 | 4  | 26.7   | b5b7y3y6                                                                     | 1574.89 | 66.010  | 33192  | 3 | 525.63  | -9.92  |
| P35579 MYH9_HUMAN Myosin-9 | 87  | Carbamidomethyl+C(14) | KLEEEQIILEDQNCK                        | 974  | 15 | 3  | 25.65  | b5b7b8                                                                       | 1888.91 | 50.659  | 32461  | 3 | 630.31  | -10.47 |
| P35579 MYH9_HUMAN Myosin-9 | 88  | Carbamidomethyl+C(6)  | DKADFCIIHYAGK                          | 563  | 13 | 4  | 31.41  | b11y4y5y11                                                                   | 1537.73 | 54.440  | 25873  | 3 | 513.25  | -10.08 |
| P35579 MYH9_HUMAN Myosin-9 | 89  |                       | DLEAHIDSANKNR                          | 1620 | 13 | 10 | 64.5   | b4b5°b5b7°b7b9y6*y6y<br>8y9                                                  | 1482.73 | 30.885  | 25827  | 3 | 494.91  | -0.49  |
| P35579 MYH9_HUMAN Myosin-9 | 90  |                       | LTKDFSALSQLQDTQELLQEENR                | 1298 | 24 | 3  | 12.37  | b10y3y5                                                                      | 2835.36 | 96.592  | 25803  | 3 | 945.79  | -13.69 |
| P35579 MYH9_HUMAN Myosin-9 | 91  |                       | GAGDGSDEEVDGKADGAEAKPA<br>E            | 1937 | 23 | 4  | 19.48  | b16y3y12y15                                                                  | 2174.95 | 42.152  | 24745  | 2 | 1087.98 | 9.32   |
| P35579 MYH9_HUMAN Myosin-9 | 92  |                       | QLEEAEEEAQRANASR                       | 1877 | 16 | 4  | 23.44  | b3b11y11y14                                                                  | 1830.87 | 104.665 | 24367  | 2 | 915.94  | 9.40   |
| P35579 MYH9_HUMAN Myosin-9 | 93  |                       | IAQLEEEEEEQGNTELINDRLK                 | 1730 | 23 | 5  | 28.55  | b3b6b9b10y16                                                                 | 2713.35 | 107.221 | 22407  | 4 | 679.09  | -2.79  |
| P35579 MYH9_HUMAN Myosin-9 | 94  |                       | QLAAENRLTEMETLQSQLMAEK                 | 860  | 22 | 5  | 13.05  | b3°b3y7°y7y15                                                                | 2534.24 | 107.934 | 16559  | 3 | 845.42  | -6.55  |
| P35579 MYH9_HUMAN Myosin-9 | 95  |                       | VEAQLQELQVKFNEGER                      | 1249 | 17 | 6  | 26.6   | b6°b6b7b9°b9y4                                                               | 2017.05 | 61.406  | 13372  | 3 | 673.02  | 9.80   |
| P35579 MYH9_HUMAN Myosin-9 | 96  |                       | DLEGLSQRHEEK                           | 1392 | 12 | 3  | 21.63  | b5y6y9                                                                       | 1440.70 | 72.703  | 13286  | 2 | 720.85  | -5.34  |
| P35579 MYH9_HUMAN Myosin-9 | 97  |                       | TDLLLEPYNKYR                           | 289  | 12 | 3  | 25.61  | b4y4y5                                                                       | 1524.80 | 60.430  | 12310  | 3 | 508.94  | -5.84  |
| P35579 MYH9_HUMAN Myosin-9 | 98  |                       | SGFEPASLKEEVGEEAIVELVENG<br>K          | 38   | 25 | 6  | 27.21  | b6b8b13°b13b14y3                                                             | 2660.33 | 114.989 | 10809  | 3 | 887.45  | 0.00   |
| P35579 MYH9_HUMAN Myosin-9 | 99  |                       | KANLQIDQINTDLNLER                      | 1753 | 17 | 4  | 25.35  | b13y6y8y11                                                                   | 1998.06 | 65.395  | 9564   | 2 | 999.53  | -1.71  |
| P35579 MYH9_HUMAN Myosin-9 | 100 |                       | NAEQYKQADK                             | 1856 | 11 | 3  | 30.62  | y3y4y7                                                                       | 1309.60 | 64.069  | 9067   | 2 | 655.30  | -0.09  |
| P35579 MYH9_HUMAN Myosin-9 | 101 |                       | KMQQNIQELEELEEEESAR                    | 939  | 20 | 3  | 13.93  | b8b14y14                                                                     | 2461.17 | 68.811  | 6088   | 3 | 821.06  | 6.25   |
| P35579 MYH9_HUMAN Myosin-9 | 102 |                       | V DYKADEWLMK                           | 576  | 11 | 6  | 46.57  | b3°b3b8b9°b9b10                                                              | 1397.68 | 54.871  | 5400   | 2 | 699.34  | -1.31  |
| P35579 MYH9_HUMAN Myosin-9 | 103 |                       | DFSALSQLQDTQELLQEENRQK                 | 1301 | 23 | 4  | 22.77  | b5b6°b6b13                                                                   | 2749.32 | 86.458  | 5205   | 3 | 917.11  | -3.29  |
| P35579 MYH9_HUMAN Myosin-9 | 104 |                       | YEILTNPSPKGFMDGK                       | 720  | 17 | 3  | 23.2   | y6y8y10                                                                      | 1909.96 | 59.250  | 4081   | 3 | 637.32  | -7.54  |
| P35579 MYH9_HUMAN Myosin-9 | 105 |                       | RALEQQVEEMK                            | 1527 | 11 | 4  | 26.64  | b10°b10y9y10                                                                 | 1360.70 | 62.134  | 3767   | 1 | 1360.70 | 6.19   |
| P35579 MYH9_HUMAN Myosin-9 | 106 |                       | NENARQQLER                             | 1775 | 10 | 6  | 27.97  | b5°b5b6°b6y8*y8                                                              | 1257.61 | 71.964  | 3752   | 2 | 629.31  | -13.30 |
| P35579 MYH9_HUMAN Myosin-9 | 107 |                       | LLEDRIAEFTTNLTETEEK                    | 995  | 19 | 3  | 14.47  | b14y8y10                                                                     | 2280.13 | 46.586  | 3253   | 3 | 760.71  | 0.43   |
| P35579 MYH9_HUMAN Myosin-9 | 108 |                       | LMATLRNTNPNFVR                         | 656  | 14 | 3  | 26.47  | y5y8y9                                                                       | 1646.86 | 45.202  | 2654   | 3 | 549.63  | -8.97  |
| P35579 MYH9_HUMAN Myosin-9 | 109 |                       | QAQQRDELADAEIANSNGK                    | 1697 | 19 | 3  | 14.47  | b3b10y6                                                                      | 2088.96 | 105.493 | 2546   | 2 | 1044.99 | -7.36  |
| P35579 MYH9_HUMAN Myosin-9 | 110 | Carbamidomethyl+C(4)  | ADFCIIHYAGKVDYK                        | 565  | 15 | 4  | 28.59  | b9b10b13y3                                                                   | 1799.88 | 107.835 | 2093   | 2 | 900.44  | -1.83  |
| P35579 MYH9_HUMAN Myosin-9 | 111 |                       | MAQQAADKYLVDK                          | 0    | 14 | 3  | 26.47  | b5b6b9                                                                       | 1643.80 | 25.006  | 2036   | 3 | 548.60  | -8.17  |
| P35579 MYH9_HUMAN Myosin-9 | 112 |                       | QVEDEKNSFR                             | 1332 | 10 | 7  | 53.92  | y4y5y8°y8y9°y9*y9                                                            | 1251.58 | 136.371 | 1745   | 1 | 1251.58 | -12.68 |

|                                             |     |                                         |                        |      |    |    |        |                                                           |         |         |        |   |         |        |
|---------------------------------------------|-----|-----------------------------------------|------------------------|------|----|----|--------|-----------------------------------------------------------|---------|---------|--------|---|---------|--------|
| P35579 MYH9_HUMAN Myosin-9                  | 113 |                                         | MQQNIQELEEQLLEEEESARQK | 940  | 21 | 3  | 23.11  | b6b8b9                                                    | 2589.18 | 103.274 | 1660   | 3 | 863.73  | -13.20 |
| P35579 MYH9_HUMAN Myosin-9                  | 114 |                                         | RHEMPPHIYAITDTAYR      | 142  | 17 | 10 | 66.11  | b5°b5b6b8b12y5y7y8y9°y9                                   | 2071.00 | 111.804 | 1608   | 3 | 691.01  | -8.02  |
| P35579 MYH9_HUMAN Myosin-9                  | 115 | Phosphoryl STY()                        | HEMPPHIYAITDTAYR       | 143  | 16 | 9  | 62.56  | b4_H3PO4<br>b4b5b6b10°b10b11y5°y5y10_HPO3 y10             | 1994.87 | 44.561  | 53858  | 3 | 665.63  | 0.37   |
| P35579 MYH9_HUMAN Myosin-9                  | 116 | Phosphoryl STY(2)                       | VSHLLGINVTDFTR         | 373  | 14 | 4  | 24.13  | b13y12y13°y13                                             | 1651.82 | 83.889  | 12193  | 3 | 551.28  | 6.87   |
| P35579 MYH9_HUMAN Myosin-9                  | 117 | Phosphoryl STY(4)                       | VIQYLAYVASSHK          | 186  | 13 | 5  | 20.02  | b5b12°b12y8°y8                                            | 1558.76 | 136.462 | 3881   | 1 | 1558.76 | -0.08  |
| P35579 MYH9_HUMAN Myosin-9                  | 118 | Phosphoryl STY(4)                       | ASITALEAK              | 1806 | 9  | 5  | 29.76  | b3°b3y7y8°y8                                              | 983.47  | 97.775  | 2193   | 1 | 983.47  | -0.81  |
| P35579 MYH9_HUMAN Myosin-9                  | 119 | Phosphoryl STY(15)                      | HSQAVEELAEQLEQTK       | 1193 | 16 | 3  | 16.61  | b13b15y10_H3PO4 y10                                       | 1919.84 | 75.652  | 1786   | 2 | 960.43  | -10.55 |
| P35579 MYH9_HUMAN Myosin-9                  | 120 | Oxidation+M(12)                         | LTEMETLQSQLMAEK        | 867  | 15 | 4  | 17.57  | b4°b4b13y12                                               | 1767.85 | 104.579 | 163786 | 2 | 884.43  | -3.04  |
| P35579 MYH9_HUMAN Myosin-9                  | 121 | Oxidation+M(12)                         | ELEDATETADAMNR         | 1898 | 14 | 4  | 32.14  | b9b10y4y12                                                | 1581.69 | 54.079  | 12374  | 2 | 791.35  | 13.51  |
| P35579 MYH9_HUMAN Myosin-9                  | 122 | Oxidation+M(2)                          | VMQEQGTHPK             | 545  | 10 | 3  | 26.21  | b3b9y6                                                    | 1170.55 | 64.229  | 9789   | 2 | 585.78  | -9.07  |
| P35579 MYH9_HUMAN Myosin-9                  | 123 | Oxidation+M(7)                          | DMFQETMEAMR            | 316  | 11 | 12 | 51.73  | b3°b3b4°b4°b4b5°b5b7°b7y8°y8*y8                           | 1404.55 | 16.853  | 8241   | 3 | 468.85  | -9.91  |
| P35579 MYH9_HUMAN Myosin-9                  | 124 | Oxidation+M(4)                          | HEAMITDLEER            | 1024 | 11 | 3  | 30.62  | y6y8y9                                                    | 1359.64 | 50.829  | 5096   | 3 | 453.88  | 10.59  |
| P35579 MYH9_HUMAN Myosin-9                  | 125 | Oxidation+M(3)                          | LEMDLKDLEAHIDSANK      | 1614 | 17 | 4  | 22.13  | b3b16y5y9                                                 | 1957.96 | 97.760  | 2729   | 3 | 653.32  | 3.43   |
| P35579 MYH9_HUMAN Myosin-9                  | 126 | Carbamidomethyl+C(8);<br>Oxidation+M(5) | LQAQMKDCMRELDTR        | 1642 | 16 | 5  | 27.52  | b3y5y7y8°y8                                               | 2025.94 | 116.896 | 2726   | 3 | 675.98  | 11.87  |
| P35579 MYH9_HUMAN Myosin-9                  | 127 |                                         | PHLVLDQLR              | 684  | 9  | 1  | 7.74   | b3                                                        | 1090.63 | 70.765  | 11707  | 2 | 545.82  | -3.36  |
| P35579 MYH9_HUMAN Myosin-9                  | 128 |                                         | QYLAYVASSHK            | 188  | 11 | 1  | 7.35   | b3                                                        | 1266.65 | 60.655  | 9499   | 2 | 633.83  | 1.45   |
| P35579 MYH9_HUMAN Myosin-9                  | 129 |                                         | GVLAHLEEEER            | 765  | 10 | 0  | 2.58   |                                                           | 1152.60 | 49.430  | 8271   | 2 | 576.80  | -2.54  |
| P35579 MYH9_HUMAN Myosin-9                  | 130 |                                         | EQEVNIL                | 1165 | 7  | 0  | 1.72   |                                                           | 844.45  | 36.476  | 7674   | 2 | 422.73  | 9.47   |
| P35579 MYH9_HUMAN Myosin-9                  | 131 | Carbamidomethyl+C(2)                    | FCIIHYAGK              | 567  | 9  | 2  | 18.47  | b3b8                                                      | 1108.56 | 58.498  | 6673   | 2 | 554.78  | 1.21   |
| P35579 MYH9_HUMAN Myosin-9                  | 132 | Carbamidomethyl+C(3)                    | DFCIIHYAGK             | 566  | 10 | 0  | 2.58   |                                                           | 1223.60 | 58.501  | 6121   | 2 | 612.30  | 7.58   |
| P35579 MYH9_HUMAN Myosin-9                  | 133 |                                         | LAHLEEEER              | 767  | 8  | 1  | 7.74   | b3                                                        | 996.50  | 49.474  | 5361   | 2 | 498.75  | -9.68  |
| P35579 MYH9_HUMAN Myosin-9                  | 134 |                                         | AHLEEEER               | 768  | 7  | 0  | 2.58   |                                                           | 883.43  | 49.410  | 2980   | 2 | 442.22  | -1.24  |
| P35579 MYH9_HUMAN Myosin-9                  | 135 |                                         | DPHLVLDQLR             | 683  | 10 | 0  | 2.58   |                                                           | 1205.67 | 70.755  | 2858   | 2 | 603.34  | 5.16   |
| P35579 MYH9_HUMAN Myosin-9                  | 136 |                                         | ATLHAQVADMK            | 1359 | 11 | 1  | 7.35   | b9                                                        | 1184.61 | 46.447  | 1638   | 2 | 592.81  | -0.41  |
| P35579 MYH9_HUMAN Myosin-9                  | 137 |                                         | EEVGEEAIVELVENGKK      | 47   | 17 | 0  | 5.16   |                                                           | 1853.94 | 75.124  | 9153   | 3 | 618.65  | -2.44  |
| P35579 MYH9_HUMAN Myosin-9                  | 138 |                                         | QIATLHAQVADMK          | 1357 | 13 | 0  | 3.44   |                                                           | 1408.72 | 46.440  | 5282   | 3 | 470.25  | 1.99   |
| P35579 MYH9_HUMAN Myosin-9                  | 139 |                                         | IIGLDQVAGMSETALPGAFK   | 617  | 20 | 0  | 6.45   |                                                           | 2000.02 | 89.526  | 3014   | 3 | 667.35  | -13.43 |
| P35579 MYH9_HUMAN Myosin-9                  | 140 |                                         | ASITALEAK              | 1806 | 9  | 0  | 1.72   |                                                           | 885.49  | 41.675  | 2876   | 2 | 443.25  | -8.00  |
| P67936 TPM4_HUMAN Tropomyosin alpha-4 chain | 1   |                                         | IQLVEEELDR             | 55   | 10 | 19 | 112.61 | b2°b2b3b4y1y2y3y4°y4y5°y5y6°y6y7y8y9°y9*y9y10             | 1243.65 | 58.792  | 415495 | 2 | 622.33  | -0.39  |
| P67936 TPM4_HUMAN Tropomyosin alpha-4 chain | 2   |                                         | TIDDLEEK               | 215  | 8  | 5  | 40.12  | y1y2y3y4y6                                                | 962.46  | 34.088  | 181242 | 2 | 481.74  | -5.07  |
| P67936 TPM4_HUMAN Tropomyosin alpha-4 chain | 3   |                                         | IQUALQQADEAEDR         | 13   | 14 | 22 | 137.21 | b2°b2b3b4y1y2y3°y3y4y5°y5y6y8y9°y9*y9y10°y10*y10y11y12y14 | 1614.78 | 39.020  | 173909 | 2 | 807.89  | 4.08   |
| P67936 TPM4_HUMAN Tropomyosin alpha-4 chain | 4   |                                         | AEGDVAALNRR            | 44   | 11 | 13 | 68.47  | b1b2b6b7y2y6°y6y7*y7y9*y9y10y11                           | 1171.62 | 29.225  | 91870  | 2 | 586.31  | -1.88  |
| P67936 TPM4_HUMAN Tropomyosin alpha-4 chain | 5   |                                         | AEGDVAALNR             | 44   | 10 | 7  | 50.91  | b2y4*y4y5y6y8y10                                          | 1015.52 | 32.510  | 64874  | 2 | 508.26  | 3.91   |
| P67936 TPM4_HUMAN Tropomyosin alpha-4 chain | 6   |                                         | LVILEGELER             | 132  | 10 | 4  | 27.97  | b2b3y7y8                                                  | 1170.67 | 66.656  | 40190  | 2 | 585.84  | -1.46  |
| P67936 TPM4_HUMAN Tropomyosin alpha-4 chain | 7   |                                         | LATALQK                | 69   | 7  | 11 | 65.57  | b3°b3b4y3y5°y5*y5y6°y6*y6y7                               | 744.45  | 27.845  | 32670  | 2 | 372.73  | -14.51 |
| P67936 TPM4_HUMAN Tropomyosin alpha-4 chain | 8   |                                         | MEIQEMQLK              | 104  | 9  | 5  | 37.54  | b2y2y4y7y8                                                | 1149.56 | 56.361  | 11575  | 1 | 1149.56 | 0.64   |
| P67936 TPM4_HUMAN Tropomyosin alpha-4 chain | 9   |                                         | AGLNSLEAVKR            | 1    | 11 | 4  | 23.63  | b3b8°b8y5                                                 | 1157.65 | 57.911  | 5571   | 2 | 579.33  | -14.45 |

|                                              |    |                       |                                          |     |    |    |        |                                                                                                     |         |         |        |   |        |        |
|----------------------------------------------|----|-----------------------|------------------------------------------|-----|----|----|--------|-----------------------------------------------------------------------------------------------------|---------|---------|--------|---|--------|--------|
| [P67936]TPM4_HUMAN Tropomyosin alpha-4 chain | 10 |                       | YSEK                                     | 177 | 4  | 1  | 12.51  | y3                                                                                                  | 526.25  | 53.927  | 2924   | 1 | 526.25 | -5.57  |
| [P67936]TPM4_HUMAN Tropomyosin alpha-4 chain | 11 | Carbamidomethyl+C(19) | EENVGLHQTLDTLNELNCI                      | 228 | 20 | 3  | 13.93  | b8b13y9                                                                                             | 2340.15 | 61.558  | 2083   | 3 | 780.72 | 15.44  |
| [P67936]TPM4_HUMAN Tropomyosin alpha-4 chain | 12 |                       | KLVILEGELER                              | 131 | 11 | 4  | 40.55  | b4b5b6y7                                                                                            | 1298.77 | 61.712  | 105263 | 2 | 649.89 | 0.85   |
| [P67936]TPM4_HUMAN Tropomyosin alpha-4 chain | 13 |                       | KIQALQQQAEDAEDR                          | 12  | 15 | 10 | 87.05  | b10y4°y4y5y6y7y8*y8y9y12                                                                            | 1742.85 | 36.270  | 70993  | 3 | 581.62 | -8.19  |
| [P67936]TPM4_HUMAN Tropomyosin alpha-4 chain | 14 |                       | IQLVEEELDRAQER                           | 55  | 14 | 8  | 47.28  | b7°b7*b7y4*y4y5y11y12                                                                               | 1727.88 | 58.297  | 49422  | 3 | 576.63 | -4.38  |
| [P67936]TPM4_HUMAN Tropomyosin alpha-4 chain | 15 |                       | LEEAEKAADESER                            | 76  | 13 | 4  | 48.22  | y5y6y7y8                                                                                            | 1476.67 | 24.217  | 39788  | 3 | 492.90 | -4.79  |
| [P67936]TPM4_HUMAN Tropomyosin alpha-4 chain | 16 |                       | EKAEGDVAALNR                             | 42  | 12 | 5  | 33.32  | b5y4y8y9°y9                                                                                         | 1272.65 | 29.975  | 8608   | 2 | 636.83 | -6.33  |
| [P67936]TPM4_HUMAN Tropomyosin alpha-4 chain | 17 |                       | SLEAASEKYSEK                             | 169 | 12 | 3  | 21.63  | b9y6y9                                                                                              | 1341.65 | 25.579  | 2052   | 2 | 671.33 | -0.27  |
| [P67936]TPM4_HUMAN Tropomyosin alpha-4 chain | 18 |                       | EDKYEEIEK                                | 181 | 9  | 3  | 29.76  | b3b4y4                                                                                              | 1182.56 | 19.540  | 2016   | 3 | 394.86 | 10.12  |
| [P67936]TPM4_HUMAN Tropomyosin alpha-4 chain | 19 | Phosphoryl STY(5)     | AGLNSLEAVK                               | 1   | 10 | 5  | 51.3   | b4b8_HPO3<br>b8y3y4y6_HPO3 y6                                                                       | 1081.51 | 62.987  | 10781  | 3 | 361.17 | -11.29 |
| [P67936]TPM4_HUMAN Tropomyosin alpha-4 chain | 20 | Phosphoryl STY(6)     | MAGLNSLEAVK                              | 0   | 11 | 3  | 23.63  | b5b10y6                                                                                             | 1212.56 | 75.477  | 7177   | 2 | 606.78 | 1.71   |
| [P67936]TPM4_HUMAN Tropomyosin alpha-4 chain | 21 |                       | GDVAALNRR                                | 46  | 9  | 3  | 30.62  | b3b4b6                                                                                              | 971.53  | 29.228  | 46042  | 2 | 486.27 | -3.46  |
| [P67936]TPM4_HUMAN Tropomyosin alpha-4 chain | 22 |                       | EGDVAALNRR                               | 45  | 10 | 2  | 18.47  | b3b9                                                                                                | 1100.58 | 29.227  | 17018  | 2 | 550.79 | -1.00  |
| [P67936]TPM4_HUMAN Tropomyosin alpha-4 chain | 23 |                       | AEGDVAALNRR                              | 44  | 11 | 0  | 2.58   |                                                                                                     | 1153.60 | 29.276  | 4396   | 3 | 385.20 | -5.19  |
| [P69905]HBA_HUMAN Hemoglobin subunit alpha   | 1  |                       | VGAHAGEYGAEALER                          | 17  | 15 | 19 | 182.87 | b4b5b6b7b8b9°b9b10b11y1y2y3y4y5y6y7y10y11y15                                                        | 1529.72 | 39.750  | 546813 | 3 | 510.58 | -10.69 |
| [P69905]HBA_HUMAN Hemoglobin subunit alpha   | 2  |                       | VADALNAVAHVDDMPNALSALSDLHAHK             | 62  | 29 | 37 | 244.87 | b1b2b3b4b5°b5b6°b6b7°b7b13b14°b14b15°b15y1y2y3y4y5y6°y6y7°y7y8y9y10°y10y11y14y20y21y24y25y27y29*y29 | 2996.47 | 87.761  | 514812 | 4 | 749.87 | -6.84  |
| [P69905]HBA_HUMAN Hemoglobin subunit alpha   | 3  |                       | MFLSFPTTK                                | 32  | 9  | 14 | 86.3   | b2b3y1y2°y2y3°y3y4°y4y5y6y7y8y9                                                                     | 1071.55 | 73.738  | 495398 | 2 | 536.28 | -6.04  |
| [P69905]HBA_HUMAN Hemoglobin subunit alpha   | 4  |                       | VDPVNFK                                  | 93  | 7  | 12 | 81.52  | b1b3b5b7y1y3*y3y4y5y6°y6y7                                                                          | 818.43  | 42.203  | 141318 | 2 | 409.72 | -9.47  |
| [P69905]HBA_HUMAN Hemoglobin subunit alpha   | 5  |                       | TYFPFDLSHGSAQVK                          | 41  | 16 | 8  | 51.76  | b8y7y8*y8y10y12°y12y13                                                                              | 1833.85 | 61.899  | 434542 | 4 | 459.22 | -20.83 |
| [P69905]HBA_HUMAN Hemoglobin subunit alpha   | 6  |                       | VLSPADKTNVK                              | 1   | 11 | 3  | 23.63  | b10y4y7                                                                                             | 1171.66 | 41.759  | 48766  | 2 | 586.33 | -7.50  |
| [P69905]HBA_HUMAN Hemoglobin subunit alpha   | 7  | Carbamidomethyl+C(5)  | LLSHCLLVTLAAHLPAEFTPAVHASLDKFLASVSTVLTSK | 100 | 40 | 5  | 22.61  | b5y3y4y7y9                                                                                          | 4258.28 | 135.885 | 26406  | 5 | 852.46 | -11.12 |
| [P69905]HBA_HUMAN Hemoglobin subunit alpha   | 8  |                       | MFLSFPTTKTYFPFDLSHGSAQVK                 | 32  | 25 | 5  | 18.25  | b3b6b11°b11y14                                                                                      | 2886.44 | 115.932 | 5279   | 3 | 962.82 | 3.30   |
| [P69905]HBA_HUMAN Hemoglobin subunit alpha   | 9  |                       | PNALSALSDLHAHK                           | 77  | 14 | 5  | 35.73  | b3b4*b4b5°b5                                                                                        | 1473.78 | 87.761  | 11144  | 2 | 737.39 | -1.08  |
| [P69905]HBA_HUMAN Hemoglobin subunit alpha   | 10 |                       | LSALSDLHAHK                              | 80  | 11 | 2  | 12.18  | b4b6                                                                                                | 1191.64 | 87.742  | 2051   | 2 | 596.32 | -7.99  |
| [P69905]HBA_HUMAN Hemoglobin subunit alpha   | 11 |                       | ALSALSDLHAHK                             | 79  | 12 | 0  | 10.33  |                                                                                                     | 1262.68 | 87.775  | 1909   | 2 | 631.84 | -4.54  |
| [P69905]HBA_HUMAN Hemoglobin subunit alpha   | 12 |                       | VGAHAGEYGAEALER                          | 17  | 15 | 0  | 4.3    |                                                                                                     | 1511.72 | 39.740  | 11495  | 3 | 504.58 | 2.91   |

|                                           |    |                                                                          |                                       |     |    |    |        |                                                                   |         |         |        |   |         |        |
|-------------------------------------------|----|--------------------------------------------------------------------------|---------------------------------------|-----|----|----|--------|-------------------------------------------------------------------|---------|---------|--------|---|---------|--------|
| P68363 TBA1B_HUMAN Tubulin alpha-IB chain | 1  |                                                                          | VGINYQPPTVVPGGDLAK                    | 352 | 18 | 14 | 58.01  | b3b5*b5b6*b6b11°b11y1y2y3y7y8y12y18                               | 1824.98 | 65.287  | 217298 | 2 | 913.00  | -0.33  |
| P68363 TBA1B_HUMAN Tubulin alpha-IB chain | 2  |                                                                          | AVFVDLEPTVIDEVR                       | 64  | 15 | 13 | 124.42 | b3b6b7y2y3y4y6y7y8y10y11y12y15                                    | 1701.91 | 83.845  | 209045 | 2 | 851.46  | 0.14   |
| P68363 TBA1B_HUMAN Tubulin alpha-IB chain | 3  |                                                                          | QLFHPEQLITGKEDAANNYAR                 | 84  | 21 | 16 | 83.17  | b2b4*b4b5b6*b6b10y3y5*y5y6y7*y7y9y12y21                           | 2415.20 | 61.492  | 170806 | 3 | 805.74  | -0.51  |
| P68363 TBA1B_HUMAN Tubulin alpha-IB chain | 4  | Carbamidomethyl+C(8)                                                     | SIQFVDWCPTGFK                         | 339 | 13 | 24 | 179.86 | b3b4b5°b5b6°b6b7°b7°b7b12y2y3y5°y5y6°y6y7°y7y8y9°y9y10y12y13      | 1584.76 | 82.130  | 138460 | 2 | 792.88  | 2.31   |
| P68363 TBA1B_HUMAN Tubulin alpha-IB chain | 5  |                                                                          | NLDIERPTYTNLNR                        | 215 | 14 | 13 | 71.12  | b2*b2b3°b3y2y3y4*y4y6y7y8y12y14                                   | 1718.87 | 52.276  | 109813 | 3 | 573.63  | -9.73  |
| P68363 TBA1B_HUMAN Tubulin alpha-IB chain | 6  | Carbamidomethyl+C(3)                                                     | AVCMLSNTTAAIEAWAR                     | 373 | 17 | 7  | 48.39  | b8b9y10y11°y11y13y15                                              | 1864.91 | 83.499  | 94580  | 2 | 932.96  | 1.31   |
| P68363 TBA1B_HUMAN Tubulin alpha-IB chain | 7  | Carbamidomethyl+C(15)                                                    | AYHEQLSVAEITNACFEPANQMV<br>K          | 280 | 24 | 9  | 53.84  | b10b14y4y9y11y12y13°y13y17                                        | 2750.30 | 72.865  | 53972  | 3 | 917.44  | 3.99   |
| P68363 TBA1B_HUMAN Tubulin alpha-IB chain | 8  |                                                                          | LISQIVSSITASLR                        | 229 | 14 | 5  | 18.69  | b4y2y5y8y14                                                       | 1487.88 | 100.286 | 51813  | 2 | 744.44  | -2.13  |
| P68363 TBA1B_HUMAN Tubulin alpha-IB chain | 9  | Carbamidomethyl+C(4);<br>Carbamidomethyl+C(5)                            | YMACCLLYR                             | 311 | 9  | 5  | 29.76  | b2b3y5y7y9                                                        | 1249.56 | 60.691  | 43718  | 2 | 625.28  | 4.01   |
| P68363 TBA1B_HUMAN Tubulin alpha-IB chain | 10 |                                                                          | LSVDYGKK                              | 156 | 8  | 10 | 66     | b2°b2y2y3y4y5y6°y6y7y8                                            | 909.50  | 28.699  | 36993  | 2 | 455.25  | -3.22  |
| P68363 TBA1B_HUMAN Tubulin alpha-IB chain | 11 |                                                                          | FDGALNVDLTEFQTNLVPYPR                 | 243 | 21 | 12 | 66.62  | b2°b2b3b4b5b12b13y2y4y5y12y21                                     | 2409.22 | 94.359  | 27498  | 2 | 1205.12 | 6.49   |
| P68363 TBA1B_HUMAN Tubulin alpha-IB chain | 12 |                                                                          | GHYTIGK                               | 105 | 7  | 5  | 39.69  | b4°b4b6y6y7                                                       | 775.41  | 26.580  | 7470   | 2 | 388.21  | 5.67   |
| P02776 PLF4_HUMAN Platelet factor 4       | 1  | Carbamidomethyl+C(5)                                                     | AGPHCPTAQLIATLK                       | 62  | 15 | 14 | 134.05 | b4b5b8b9b10b15y3y4y5y6y7y8y11y15                                  | 1577.83 | 60.633  | 393974 | 3 | 526.62  | -9.52  |
| P02776 PLF4_HUMAN Platelet factor 4       | 2  |                                                                          | HITSLEVIK                             | 53  | 9  | 13 | 102.25 | b1b2b3b4b5°b5b6b7y2y3y7y8y9                                       | 1039.61 | 47.740  | 353747 | 2 | 520.31  | -2.82  |
| P02776 PLF4_HUMAN Platelet factor 4       | 3  | Carbamidomethyl+C(2)                                                     | ICLDLQAPLYK                           | 81  | 11 | 7  | 35.39  | b2y2y8y9y10°y10y11                                                | 1333.72 | 73.185  | 111082 | 2 | 667.36  | -0.73  |
| P02776 PLF4_HUMAN Platelet factor 4       | 4  | Carbamidomethyl+C(3)                                                     | KICLDLQAPLYK                          | 80  | 12 | 3  | 25.61  | b5y4y5                                                            | 1461.82 | 66.945  | 54822  | 2 | 731.41  | 4.34   |
| P02679 FIBG_HUMAN Fibrinogen gamma chain  | 1  |                                                                          | AIQLTYNPDESSKPNMIDAATLK               | 88  | 23 | 24 | 174.16 | b1b2b3b4b5b7b12°b12y2y3y4y6y10°y10y12y14y16y17y18*y18y19y20y21y23 | 2520.27 | 66.082  | 373052 | 3 | 840.76  | 2.42   |
| P02679 FIBG_HUMAN Fibrinogen gamma chain  | 2  | Carbamidomethyl+C(8);<br>Carbamidomethyl+C(12);<br>Carbamidomethyl+C(26) | VAQLEAQCQEPCCKDTVQIHDITG<br>KDCQDIANK | 153 | 32 | 18 | 85.78  | b2b3b5°b5b16y2y3*y3y4y8y9y10y13y14y19y27y29y32                    | 3712.69 | 49.625  | 203244 | 5 | 743.34  | -11.84 |
| P02679 FIBG_HUMAN Fibrinogen gamma chain  | 3  |                                                                          | NWIQYKEGFGHLSPTGTTEFWLG<br>NEK        | 232 | 26 | 10 | 26.96  | b3b8b12y2y3°y3y6°y6y9y26                                          | 3039.46 | 107.773 | 153246 | 4 | 760.62  | -0.32  |
| P02679 FIBG_HUMAN Fibrinogen gamma chain  | 4  |                                                                          | YLQEIYNSNNQK                          | 134 | 12 | 14 | 119.88 | b2b3b4b5b9b10y6y7*y7y8y9y10*y10y12                                | 1513.73 | 44.041  | 132164 | 2 | 757.37  | 2.34   |
| P02679 FIBG_HUMAN Fibrinogen gamma chain  | 5  |                                                                          | LTIGEGQQHHLGGAK                       | 417 | 15 | 5  | 38.8   | b10y4y5y9y12                                                      | 1545.79 | 31.901  | 124040 | 3 | 515.94  | -13.19 |
| P02679 FIBG_HUMAN Fibrinogen gamma chain  | 6  | Carbamidomethyl+C(3);<br>Carbamidomethyl+C(4)                            | DNCCILDER                             | 31  | 9  | 10 | 60.41  | b2b3°b3y1y2y3y4y5y7y9                                             | 1194.49 | 44.075  | 122801 | 2 | 597.75  | 1.64   |

|                                          |    |                                             |                              |     |    |    |        |                                               |         |         |        |   |         |        |
|------------------------------------------|----|---------------------------------------------|------------------------------|-----|----|----|--------|-----------------------------------------------|---------|---------|--------|---|---------|--------|
| P02679 FIBG_HUMAN Fibrinogen gamma chain | 7  | Carbamidomethyl+C(8); Carbamidomethyl+C(12) | VAQLEAQCQEPCCKDTVQIHDTGK     | 153 | 24 | 11 | 55.45  | b2y2y3y14y19y20*y20y21y22*y22y24              | 2768.32 | 50.370  | 106616 | 4 | 692.84  | -5.56  |
| P02679 FIBG_HUMAN Fibrinogen gamma chain | 8  | Carbamidomethyl+C(5); Carbamidomethyl+C(9)  | FGSYCPTTCGIADFLSTYQTK        | 40  | 21 | 18 | 123.29 | b2b3b5b14y2y3*y3y5y6y7y8y9y10y12y13y16*y16y21 | 2417.10 | 88.023  | 102258 | 2 | 1209.05 | 7.47   |
| P02679 FIBG_HUMAN Fibrinogen gamma chain | 9  |                                             | IHLISTQSAIPYALR              | 258 | 15 | 10 | 88.3   | b2b3b4y3y4y5y11y12y13y15                      | 1682.94 | 70.072  | 90898  | 3 | 561.65  | -13.49 |
| P02679 FIBG_HUMAN Fibrinogen gamma chain | 10 |                                             | QVRPEHPAETEDSLYPEDDL         | 432 | 21 | 10 | 37.62  | b2b5*b5b10*b10*b10b11b12*b12y4                | 2503.12 | 92.031  | 33161  | 4 | 626.54  | -1.17  |
| P02679 FIBG_HUMAN Fibrinogen gamma chain | 11 |                                             | ASTPNGYDNGIHWATWK            | 382 | 17 | 8  | 47.55  | b4b7*b7b11*b11b12b15y10                       | 1893.89 | 72.449  | 6159   | 2 | 947.45  | -13.02 |
| P02679 FIBG_HUMAN Fibrinogen gamma chain | 12 | Carbamidomethyl+C(13)                       | DTVQIHDTGKDCQDIANK           | 166 | 19 | 5  | 27.73  | b9b12y9*y9y10                                 | 2171.05 | 51.037  | 2500   | 2 | 1086.03 | 5.96   |
| P02679 FIBG_HUMAN Fibrinogen gamma chain | 13 |                                             | EGFGHLSPTGTTEFWLGNEK         | 238 | 20 | 7  | 37.77  | b6*b6b7y3y4y6*y6                              | 2207.05 | 76.486  | 220801 | 3 | 736.35  | 2.99   |
| P02679 FIBG_HUMAN Fibrinogen gamma chain | 14 |                                             | YEASILTHDSSIR                | 121 | 13 | 10 | 124.41 | b3b4y3y4y5y6y7y8y9y11                         | 1491.72 | 48.959  | 186940 | 3 | 497.91  | -16.94 |
| P02679 FIBG_HUMAN Fibrinogen gamma chain | 15 |                                             | FFTSHNGMQFSTWDNDNDK          | 328 | 19 | 5  | 28.39  | b6b8b10y9y11                                  | 2290.95 | 54.262  | 89634  | 3 | 764.32  | 0.00   |
| P02679 FIBG_HUMAN Fibrinogen gamma chain | 16 |                                             | QSGLYFIKPLK                  | 188 | 11 | 4  | 46.57  | y3y4y5y7                                      | 1293.74 | 64.778  | 89303  | 3 | 431.92  | -15.95 |
| P02679 FIBG_HUMAN Fibrinogen gamma chain | 17 | Carbamidomethyl+C(8); Carbamidomethyl+C(12) | VAQLEAQCQEPCCK               | 153 | 13 | 4  | 31.41  | b3b9b10y3                                     | 1560.73 | 90.694  | 66350  | 3 | 520.91  | 9.70   |
| P02679 FIBG_HUMAN Fibrinogen gamma chain | 18 |                                             | NWIQYK                       | 232 | 6  | 5  | 39.26  | b3*b3y3*y3y4                                  | 851.43  | 49.026  | 55982  | 2 | 426.22  | -11.76 |
| P02679 FIBG_HUMAN Fibrinogen gamma chain | 19 |                                             | TSTADYAMFK                   | 282 | 10 | 3  | 26.21  | b5b8y6                                        | 1134.54 | 22.805  | 3075   | 2 | 567.77  | 20.34  |
| P02679 FIBG_HUMAN Fibrinogen gamma chain | 20 |                                             | VELEDWNGR                    | 273 | 9  | 3  | 29.76  | b5b8y5                                        | 1117.51 | 62.311  | 2054   | 2 | 559.26  | -18.68 |
| P02679 FIBG_HUMAN Fibrinogen gamma chain | 21 |                                             | NWQYKKEGFGHLSPTGTTEFWLGNEK   | 232 | 26 | 4  | 11.85  | b9y4y12*y12                                   | 3039.46 | 118.149 | 59132  | 3 | 1013.83 | 0.24   |
| P02679 FIBG_HUMAN Fibrinogen gamma chain | 22 |                                             | VGPEADKYR                    | 292 | 9  | 9  | 86.3   | b3y3y4y5y6*y6y7*y7y8                          | 1034.51 | 22.744  | 10115  | 3 | 345.51  | -13.57 |
| P02679 FIBG_HUMAN Fibrinogen gamma chain | 23 |                                             | TSTADYAMFKVGPEADK            | 282 | 17 | 3  | 22.78  | b6b7y4                                        | 1830.85 | 47.096  | 4682   | 3 | 610.95  | -6.13  |
| P02679 FIBG_HUMAN Fibrinogen gamma chain | 24 |                                             | TRWYSMK                      | 399 | 7  | 4  | 36.68  | b4*b4b5y5                                     | 971.46  | 101.786 | 2045   | 1 | 971.46  | -12.50 |
| P02679 FIBG_HUMAN Fibrinogen gamma chain | 25 | Phosphoryl STY(12)                          | AIQLTYNPDESSKPNMIDAATLK      | 88  | 23 | 4  | 12.68  | b10*b10b13y12                                 | 2600.23 | 92.711  | 1789   | 3 | 867.41  | 1.78   |
| P02679 FIBG_HUMAN Fibrinogen gamma chain | 26 |                                             | TIGEGQQHHLGGAK               | 418 | 14 | 0  | 4.3    |                                               | 1432.73 | 31.924  | 17380  | 3 | 478.25  | -1.87  |
| P02679 FIBG_HUMAN Fibrinogen gamma chain | 27 |                                             | IGEGQQHHLGGAK                | 419 | 13 | 0  | 4.3    |                                               | 1331.67 | 31.944  | 13835  | 3 | 444.56  | -7.15  |
| P02679 FIBG_HUMAN Fibrinogen gamma chain | 28 | Carbamidomethyl+C(13)                       | DTVQIHDTGKDCQ                | 166 | 14 | 2  | 12.99  | y8y10                                         | 1629.76 | 51.065  | 1789   | 2 | 815.38  | 1.05   |
| P02679 FIBG_HUMAN Fibrinogen gamma chain | 29 |                                             | NWQYKKEGFGHLSPTGTTEFWLGNEK   | 232 | 26 | 0  | 9.04   |                                               | 3022.45 | 107.758 | 4756   | 4 | 756.37  | 7.27   |
| P23528 COF1_HUMAN Cofilin-1              | 1  |                                             | NIILEEGKEILVGDVGQTVDDPYATFVK | 45  | 28 | 6  | 28.57  | b3b15y3y4y10y16                               | 3062.60 | 92.317  | 182798 | 3 | 1021.54 | 0.56   |
| P23528 COF1_HUMAN Cofilin-1              | 2  |                                             | KEDLVFIFWAPESAPLK            | 95  | 17 | 10 | 89.85  | b4b5b6b7y3y6y7y8y12y17                        | 1990.05 | 97.294  | 166285 | 3 | 664.02  | -9.69  |
| P23528 COF1_HUMAN Cofilin-1              | 3  | Carbamidomethyl+C(5)                        | AVLFCLSEDK                   | 34  | 10 | 6  | 27.97  | b1b5b10y5y6y10                                | 1181.58 | 69.104  | 155934 | 2 | 591.30  | -1.96  |
| P23528 COF1_HUMAN Cofilin-1              | 4  |                                             | YALYDATYETK                  | 81  | 11 | 15 | 108.27 | b2b6b8b9*b9b11*b11y4y6y7y8y9*y9y10y11         | 1337.63 | 52.210  | 128269 | 2 | 669.32  | 1.19   |

|                                             |    |                                           |                         |     |    |    |        |                                                                          |         |        |         |   |         |        |
|---------------------------------------------|----|-------------------------------------------|-------------------------|-----|----|----|--------|--------------------------------------------------------------------------|---------|--------|---------|---|---------|--------|
| P23528 COF1_HUMAN Cofilin-1                 | 5  | Carbamidomethyl+C(5)                      | AVLFCLSEDKK             | 34  | 11 | 12 | 85.4   | b2b3y2y3y5°y5y6y7°y7y8y9y11                                              | 1309.66 | 57.242 | 114658  | 3 | 437.23  | -13.51 |
| P23528 COF1_HUMAN Cofilin-1                 | 6  |                                           | EILVGDVGQTVDDPYATFVK    | 53  | 20 | 22 | 148.4  | b2°b2b3b4b6°b6b7b16°b16b17y2y3y4y7y8y10y11y15°y15y16°y16y20              | 2166.11 | 80.632 | 114636  | 2 | 1083.56 | 8.00   |
| P23528 COF1_HUMAN Cofilin-1                 | 7  | Carbamidomethyl+C(7)                      | MLPKDKCR                | 73  | 8  | 6  | 40.12  | b2y2y3y4y5y8                                                             | 1034.48 | 20.867 | 21438   | 2 | 517.74  | 3.89   |
| P23528 COF1_HUMAN Cofilin-1                 | 8  |                                           | VFNDMK                  | 13  | 6  | 1  | 13.37  | y5                                                                       | 753.36  | 30.657 | 11918   | 2 | 377.18  | -2.67  |
| P23528 COF1_HUMAN Cofilin-1                 | 9  | Carbamidomethyl+C(7)                      | HELQANCYEEVK            | 132 | 12 | 3  | 21.63  | b3b5y8                                                                   | 1519.70 | 34.889 | 10045   | 2 | 760.36  | 11.89  |
| P23528 COF1_HUMAN Cofilin-1                 | 10 | Carbamidomethyl+C(3)                      | LFCLSEDKK               | 36  | 9  | 1  | 7.74   | b3                                                                       | 1139.58 | 57.228 | 61847   | 2 | 570.29  | -1.29  |
| P23528 COF1_HUMAN Cofilin-1                 | 11 | Carbamidomethyl+C(4)                      | VLFCLSEDKK              | 35  | 10 | 0  | 2.58   |                                                                          | 1238.64 | 57.277 | 9383    | 2 | 619.83  | -1.28  |
| P23528 COF1_HUMAN Cofilin-1                 | 12 |                                           | EILVGDVGQTVDD           | 53  | 13 | 2  | 12.75  | y3y7                                                                     | 1359.65 | 80.613 | 2089    | 2 | 680.33  | -11.94 |
| Q9BYX7 ACTK_HUMAN Kappa-actin               | 1  |                                           | SYELPDGQVITIGNER        | 238 | 16 | 27 | 206.97 | b2b3°b3b6b8b9°b9b10b12°b12y3*y3y4*y4y5y6*y6y7y8y9y10y11°y11y12°y12y13y16 | 1790.90 | 70.748 | 2649301 | 2 | 895.95  | 2.39   |
| Q9BYX7 ACTK_HUMAN Kappa-actin               | 2  |                                           | QEYDESGPSIVHRK          | 359 | 14 | 19 | 150.15 | b3°b3b4°b4b14y2y3y4y5y6y7y8y9y10°y10y11y12y14*y14                        | 1644.79 | 31.141 | 419977  | 3 | 548.93  | -5.94  |
| Q9BYX7 ACTK_HUMAN Kappa-actin               | 3  |                                           | QEYDESGPSIVHR           | 359 | 13 | 6  | 57.36  | y1y3y4y5y6y11                                                            | 1516.69 | 37.100 | 276634  | 3 | 506.24  | -5.63  |
| Q9BYX7 ACTK_HUMAN Kappa-actin               | 4  |                                           | IWHHTFYNELR             | 84  | 11 | 3  | 26.64  | b4b5y4                                                                   | 1515.72 | 87.825 | 1641    | 2 | 758.37  | -16.43 |
| Q9BYX7 ACTK_HUMAN Kappa-actin               | 5  | Carbamidomethyl+C(2)                      | LCYVALDSEQEMAMAASSSSVEK | 215 | 23 | 8  | 40.98  | b5b12y3y7y9°y9y10y12                                                     | 2506.16 | 89.014 | 1593    | 2 | 1253.58 | 18.12  |
| Q9BYX7 ACTK_HUMAN Kappa-actin               | 6  |                                           | ELTDYLMKILTER           | 183 | 13 | 4  | 28.77  | b3b8y5y9                                                                 | 1624.86 | 63.742 | 9419    | 3 | 542.29  | -0.38  |
| Q9BYX7 ACTK_HUMAN Kappa-actin               | 7  |                                           | GYRFTTTAEQEIVR          | 196 | 14 | 5  | 44.27  | b3b4b5b10y6                                                              | 1670.85 | 67.584 | 5477    | 4 | 418.47  | -0.15  |
| Q9BYX7 ACTK_HUMAN Kappa-actin               | 8  | Carbamidomethyl+C(16)<br>;Oxidation+M(15) | DDDTAVLVIDNGSGMCK       | 1   | 17 | 4  | 23.2   | b4b10b12*b12                                                             | 1825.79 | 45.572 | 11998   | 4 | 457.20  | -0.27  |
| Q9BYX7 ACTK_HUMAN Kappa-actin               | 9  | Oxidation+M(14)                           | DLYTNTVLSGGTTMYPGIAHR   | 291 | 21 | 3  | 13.46  | b3b10y7                                                                  | 2283.11 | 75.499 | 1599    | 3 | 761.71  | -0.43  |
| P10720 PF4V_HUMAN Platelet factor 4 variant | 1  | Carbamidomethyl+C(5)                      | AGPHCPTAQLIATLK         | 65  | 15 | 14 | 134.05 | b4b5b8b9b10b15y3y4y5y6y7y8y11y15                                         | 1577.83 | 60.633 | 393974  | 3 | 526.62  | -9.52  |
| P10720 PF4V_HUMAN Platelet factor 4 variant | 2  |                                           | HITSLEVIK               | 56  | 9  | 13 | 102.25 | b1b2b3b4b5°b5b6b7y2y3y7y8y9                                              | 1039.61 | 47.740 | 353747  | 2 | 520.31  | -2.82  |
| P07996 TSP1_HUMAN Thrombospondin-1          | 1  |                                           | FTGSQPFQGVVEHATANK      | 623 | 18 | 24 | 125.72 | b1b2°b2b4°b4b5°b5b8y2y3y4y6y7°y7*y7y9*y9y11y12y13°y13*y13y16y18          | 1875.89 | 44.488 | 316517  | 3 | 625.97  | -6.70  |
| P07996 TSP1_HUMAN Thrombospondin-1          | 2  |                                           | FVFGTTPEDILR            | 216 | 12 | 17 | 107.73 | b2b5°b5b8b12y1y2y3y4y6y7y8y9°y9y10°y10y12                                | 1394.72 | 82.125 | 316077  | 2 | 697.87  | -5.51  |
| P07996 TSP1_HUMAN Thrombospondin-1          | 3  |                                           | TIVTTLQDSIR             | 288 | 11 | 17 | 112.07 | b1°b1b2b3°b3b4y3y4°y4y5y6y7*y7y8*y8y9y11                                 | 1246.70 | 67.588 | 233073  | 2 | 623.85  | -2.45  |
| P07996 TSP1_HUMAN Thrombospondin-1          | 4  |                                           | GGVNDNFQGVLQNVNR        | 201 | 15 | 18 | 139.12 | b3b5°b5b10y2y3*y3y4*y4y5y6y7y9y10y11y12y15*y15                           | 1616.82 | 65.932 | 186160  | 2 | 808.91  | 3.17   |

|                                    |    |                                                                          |                               |      |    |    |        |                                                                                 |         |         |        |   |         |        |
|------------------------------------|----|--------------------------------------------------------------------------|-------------------------------|------|----|----|--------|---------------------------------------------------------------------------------|---------|---------|--------|---|---------|--------|
| P07996 TSP1_HUMAN Thrombospondin-1 | 5  |                                                                          | GPDSPSPAFR                    | 50   | 10 | 16 | 147.53 | b2b3°b3b5b6b8b9y2y4y5y6°y6y7y8y9y10                                             | 1030.49 | 35.684  | 173856 | 2 | 515.75  | -6.04  |
| P07996 TSP1_HUMAN Thrombospondin-1 | 6  |                                                                          | MENAELDVPIQSVFTR              | 173  | 16 | 20 | 155.59 | b2b3b4b6°b6b7b8b9b11°b11b13b16y1y3y5y6y8y10y11y16                               | 1848.91 | 81.304  | 166523 | 2 | 924.96  | -0.92  |
| P07996 TSP1_HUMAN Thrombospondin-1 | 7  |                                                                          | FQMIPLDPK                     | 959  | 9  | 6  | 43.95  | b2b3b7y5y7y9                                                                    | 1088.57 | 69.403  | 162879 | 2 | 544.79  | -6.62  |
| P07996 TSP1_HUMAN Thrombospondin-1 | 8  |                                                                          | AQGYSGLSVK                    | 1054 | 10 | 9  | 79.81  | b2°b2y3y4y5y6y7y8y10                                                            | 1009.52 | 38.578  | 155334 | 2 | 505.27  | -7.32  |
| P07996 TSP1_HUMAN Thrombospondin-1 | 9  |                                                                          | GTSQNDPNWVVR                  | 968  | 12 | 7  | 67.72  | y2y3y4y6*y6y8y10                                                                | 1372.67 | 47.208  | 140942 | 2 | 686.84  | 3.91   |
| P07996 TSP1_HUMAN Thrombospondin-1 | 10 |                                                                          | NALWHTGNTPGQVR                | 1077 | 14 | 9  | 67.72  | y4y5*y5y8y9°y9y10y12y14                                                         | 1550.77 | 45.068  | 127651 | 3 | 517.59  | -10.31 |
| P07996 TSP1_HUMAN Thrombospondin-1 | 11 | Carbamidomethyl+C(2);<br>Carbamidomethyl+C(14)                           | LCNSPSPQMNGKPCGEAR            | 460  | 19 | 28 | 188.89 | b2b3b4b8y2y4y5y6y7°y7y8°y8y9°y9y10°y10*y10y11°y11*y11y12°y12*y12y13y15y17y18y19 | 2131.93 | 30.871  | 115858 | 3 | 711.31  | -1.37  |
| P07996 TSP1_HUMAN Thrombospondin-1 | 12 | Carbamidomethyl+C(3)                                                     | DNCQYVYNVDQR                  | 810  | 12 | 8  | 59.94  | y2*y2y4°y4y5y6y8y9                                                              | 1573.68 | 43.696  | 112328 | 2 | 787.34  | 6.90   |
| P07996 TSP1_HUMAN Thrombospondin-1 | 13 | Carbamidomethyl+C(7)                                                     | AQLYIDCEK                     | 164  | 9  | 4  | 37.54  | y3y4y7y9                                                                        | 1139.54 | 42.674  | 98301  | 2 | 570.27  | 0.21   |
| P07996 TSP1_HUMAN Thrombospondin-1 | 14 |                                                                          | LVPNPDQK                      | 911  | 8  | 5  | 40.12  | y2y4y6y7y8                                                                      | 910.50  | 27.360  | 59640  | 2 | 455.75  | -4.36  |
| P07996 TSP1_HUMAN Thrombospondin-1 | 15 |                                                                          | GFLLLASLR                     | 86   | 9  | 8  | 53.49  | b2y1y2y4y5y6y7y9                                                                | 989.61  | 89.824  | 55695  | 2 | 495.31  | -3.21  |
| P07996 TSP1_HUMAN Thrombospondin-1 | 16 |                                                                          | GTLLALER                      | 101  | 8  | 8  | 40.12  | b1y1y2°y2y4y5y6y8                                                               | 872.51  | 56.444  | 53721  | 2 | 436.76  | -6.02  |
| P07996 TSP1_HUMAN Thrombospondin-1 | 17 | Carbamidomethyl+C(1);<br>Carbamidomethyl+C(10);<br>Carbamidomethyl+C(13) | CENTDPGYNCLPCPPR              | 607  | 16 | 5  | 27.52  | b11y5y11y12y16                                                                  | 1949.80 | 49.941  | 50022  | 2 | 975.41  | 5.63   |
| P07996 TSP1_HUMAN Thrombospondin-1 | 18 |                                                                          | IPESGGDNSVDFIFELTGAAR         | 20   | 21 | 7  | 29.32  | b2y1y4y6y7y14y21                                                                | 2195.07 | 99.313  | 46569  | 2 | 1098.04 | 4.89   |
| P07996 TSP1_HUMAN Thrombospondin-1 | 19 | Carbamidomethyl+C(6);<br>Carbamidomethyl+C(10)                           | DLQAICGISCDELSSMVLELR         | 264  | 21 | 8  | 45.55  | b4b5b9°b9b11y3y4y8                                                              | 2409.13 | 101.939 | 40935  | 3 | 803.72  | -5.37  |
| P07996 TSP1_HUMAN Thrombospondin-1 | 20 |                                                                          | QVTQSYWDTNPTR                 | 1041 | 13 | 8  | 62.13  | b13y4y5y7y9y11°y11y13                                                           | 1595.75 | 49.037  | 39286  | 2 | 798.38  | 1.22   |
| P07996 TSP1_HUMAN Thrombospondin-1 | 21 | Carbamidomethyl+C(2)                                                     | LCNNPTQFGGK                   | 517  | 12 | 16 | 98.1   | b2b6y2y3y4y6y8°y8y9°y9*y9y10y11°y11y12*y12                                      | 1332.64 | 39.340  | 37933  | 2 | 666.82  | 3.57   |
| P07996 TSP1_HUMAN Thrombospondin-1 | 22 | Carbamidomethyl+C(2);<br>Carbamidomethyl+C(7)                            | TCHIQCCKR                     | 421  | 10 | 15 | 100.92 | b1b2b3b4b5y2y3y4y5°y5y6°y6*y6y7y10                                              | 1346.58 | 14.207  | 33226  | 3 | 449.53  | -12.87 |
| P07996 TSP1_HUMAN Thrombospondin-1 | 23 |                                                                          | VVMYEGKK                      | 1122 | 8  | 4  | 35.35  | b6y5y7y8                                                                        | 953.51  | 24.057  | 4486   | 2 | 477.26  | -7.68  |
| P07996 TSP1_HUMAN Thrombospondin-1 | 24 | Carbamidomethyl+C(3)                                                     | DNCNPLNSGQEDYDK               | 715  | 16 | 3  | 16.61  | b7y4y10                                                                         | 1865.78 | 81.426  | 125005 | 2 | 933.40  | 12.50  |
| P07996 TSP1_HUMAN Thrombospondin-1 | 25 | Carbamidomethyl+C(5)                                                     | RPPLCYHNGVQYR                 | 313  | 13 | 3  | 20.02  | b5y3y5                                                                          | 1659.80 | 36.023  | 104973 | 3 | 553.94  | -9.78  |
| P07996 TSP1_HUMAN Thrombospondin-1 | 26 | Carbamidomethyl+C(11);<br>Carbamidomethyl+C(14)                          | DTDMDGVGDQCDNCPLEHNPDQLDSDSDR | 822  | 29 | 6  | 38.87  | y3y4y9y10°y10*y10                                                               | 3320.29 | 52.233  | 49663  | 3 | 1107.43 | 6.47   |
| P07996 TSP1_HUMAN Thrombospondin-1 | 27 |                                                                          | FYVVMWK                       | 1034 | 7  | 3  | 36.68  | b6y5y6                                                                          | 972.50  | 76.330  | 34231  | 2 | 486.75  | -5.71  |



|                                     |    |                                                                                                                             |                                      |      |    |    |        |                                                     |         |         |        |   |         |        |
|-------------------------------------|----|-----------------------------------------------------------------------------------------------------------------------------|--------------------------------------|------|----|----|--------|-----------------------------------------------------|---------|---------|--------|---|---------|--------|
| [P07996 TSP1_HUMAN Thrombospondin-1 | 28 |                                                                                                                             | DFTAYR                               | 1103 | 6  | 2  | 26.31  | y3y4                                                | 772.37  | 38.754  | 28108  | 1 | 772.37  | 6.16   |
| [P07996 TSP1_HUMAN Thrombospondin-1 | 29 |                                                                                                                             | DDDYAGVFVGYQSSSR                     | 1018 | 16 | 9  | 50.51  | b9y3°y3y4y9°y9y11°y11y14                            | 1813.73 | 110.538 | 4341   | 3 | 605.25  | -18.98 |
| [P07996 TSP1_HUMAN Thrombospondin-1 | 30 | Carbamidomethyl+C(2)                                                                                                        | GCSSTSVLLTLDNNVNGSSPAIR              | 230  | 25 | 4  | 21.64  | b11°b11y12y13                                       | 2548.25 | 128.558 | 3623   | 3 | 850.09  | -7.28  |
| [P07996 TSP1_HUMAN Thrombospondin-1 | 31 | Carbamidomethyl+C(3)                                                                                                        | QVCKPR                               | 641  | 6  | 1  | 13.37  | b5                                                  | 787.42  | 41.059  | 2555   | 2 | 394.21  | -5.04  |
| [P07996 TSP1_HUMAN Thrombospondin-1 | 32 | Carbamidomethyl+C(3);<br>Carbamidomethyl+C(10)                                                                              | NPCTDGTHTDCNK                        | 647  | 12 | 7  | 31.26  | b3b6°b6y4°y4y9*y9                                   | 1418.57 | 16.812  | 1908   | 3 | 473.53  | 21.00  |
| [P07996 TSP1_HUMAN Thrombospondin-1 | 33 |                                                                                                                             | DHSGQVFSVVSNGK                       | 110  | 14 | 4  | 27.26  | b7°b7b9b13                                          | 1460.73 | 84.961  | 1537   | 3 | 487.58  | 14.79  |
| [P07996 TSP1_HUMAN Thrombospondin-1 | 34 |                                                                                                                             | IEDANLIPPVDDKFQDLVDAVR               | 60   | 23 | 20 | 159.97 | b4b5°b5b6°b6b7°b7b14y3y4y6y7°y7y9y10y11y13y15y16y17 | 2579.33 | 87.974  | 320271 | 3 | 860.45  | -3.50  |
| [P07996 TSP1_HUMAN Thrombospondin-1 | 35 |                                                                                                                             | VTEENKELANELR                        | 300  | 13 | 10 | 77.23  | b4b5b6b7°b7°b7b11°b11b12y11                         | 1544.78 | 90.706  | 149759 | 2 | 772.90  | -4.98  |
| [P07996 TSP1_HUMAN Thrombospondin-1 | 36 | Carbamidomethyl+C(4);<br>Carbamidomethyl+C(16)                                                                              | IRLCNSPSPQMNGKPCGEAR                 | 458  | 21 | 11 | 49.94  | b5°b5b7°b7b10y7y9y10*y10y11*y11                     | 2401.11 | 37.655  | 49678  | 4 | 601.03  | -1.83  |
| [P07996 TSP1_HUMAN Thrombospondin-1 | 37 |                                                                                                                             | FYVVMWKQVTQSYWDTNPTR                 | 1034 | 20 | 14 | 79.52  | b5b11b15y4*y4y5*y5y7°y7y9*y9y10y11y16               | 2549.25 | 121.136 | 22964  | 3 | 850.42  | 10.44  |
| [P07996 TSP1_HUMAN Thrombospondin-1 | 38 |                                                                                                                             | IMADSGPIYDKTYAGGR                    | 1130 | 17 | 6  | 47.62  | y4y7y8°y8y9y15                                      | 1814.86 | 47.059  | 22559  | 3 | 605.63  | -5.11  |
| [P07996 TSP1_HUMAN Thrombospondin-1 | 39 | Carbamidomethyl+C(21)                                                                                                       | FTGSQPFQGVVEHATANKQVCKPR             | 623  | 24 | 3  | 18.68  | y4y6y19                                             | 2644.28 | 40.826  | 19644  | 4 | 661.83  | -8.68  |
| [P07996 TSP1_HUMAN Thrombospondin-1 | 40 | Carbamidomethyl+C(8);<br>Carbamidomethyl+C(12)                                                                              | TKDLQAICGISCDELSSMVLELR              | 262  | 23 | 4  | 12.68  | b15°b15b22y16                                       | 2638.32 | 70.605  | 8994   | 3 | 880.11  | 12.49  |
| [P07996 TSP1_HUMAN Thrombospondin-1 | 41 | Carbamidomethyl+C(4)                                                                                                        | SRLCENNPTQFGGK                       | 515  | 14 | 3  | 18.69  | b4b7y10                                             | 1575.75 | 74.018  | 7584   | 3 | 525.92  | -13.71 |
| [P07996 TSP1_HUMAN Thrombospondin-1 | 42 | Carbamidomethyl+C(1);<br>Carbamidomethyl+C(4);<br>Carbamidomethyl+C(15);<br>Carbamidomethyl+C(21);<br>Carbamidomethyl+C(28) | CGACPPGYSGNGIQCTDVDECKEVPDACFNHNGEHR | 571  | 36 | 4  | 35.57  | b3y11y12y13                                         | 4107.63 | 48.692  | 4697   | 4 | 1027.66 | -4.87  |
| [P07996 TSP1_HUMAN Thrombospondin-1 | 43 | Carbamidomethyl+C(3)                                                                                                        | DNCRLVNPDPQK                         | 907  | 12 | 3  | 31.84  | y5y7y10                                             | 1455.70 | 58.169  | 3906   | 2 | 728.35  | -0.34  |
| [P07996 TSP1_HUMAN Thrombospondin-1 | 44 | Carbamidomethyl+C(2);<br>Carbamidomethyl+C(7)                                                                               | TCHIQECDKR                           | 421  | 10 | 12 | 97.91  | b3°b3b5°b5y3y4y5y6°y6*y6y7y8                        | 1346.58 | 20.054  | 3078   | 3 | 449.53  | -9.70  |
| [P07996 TSP1_HUMAN Thrombospondin-1 | 45 |                                                                                                                             | GPDPSSPAFRIEDANLIPPVDDK              | 50   | 24 | 3  | 12.37  | b3b9y5                                              | 2547.27 | 89.875  | 2420   | 3 | 849.76  | -2.40  |
| [P07996 TSP1_HUMAN Thrombospondin-1 | 46 |                                                                                                                             | HIGWKDFTAYR                          | 1098 | 11 | 4  | 40.55  | b3b5b9y4                                            | 1393.71 | 61.370  | 2312   | 3 | 465.24  | 5.43   |
| [P07996 TSP1_HUMAN Thrombospondin-1 | 47 | Phosphoryl.STY(9)                                                                                                           | AGTLDLSLTVQGK                        | 124  | 13 | 4  | 33.54  | b3b7y6y7                                            | 1382.67 | 63.032  | 2083   | 2 | 691.84  | -8.21  |
| [P07996 TSP1_HUMAN Thrombospondin-1 | 48 | Carbamidomethyl+C(6);<br>Carbamidomethyl+C(10);<br>Phosphoryl.STY(15)                                                       | DLQAICGISCDELSSMVLELR                | 264  | 21 | 7  | 18.23  | b3°b3b14°b14y7°y7y11                                | 2489.13 | 121.093 | 2026   | 3 | 830.38  | 11.67  |
| [P07996 TSP1_HUMAN Thrombospondin-1 | 49 | Carbamidomethyl+C(16);<br>Oxidation+M(1)                                                                                    | MGLAWGLGVFLMHVCGTNR                  | 0    | 20 | 6  | 27.17  | b8b9y6°y6y10°y10                                    | 2248.11 | 56.864  | 3390   | 3 | 750.04  | -5.76  |

|                                        |    |                                                             |                                      |      |    |    |        |                                                            |         |         |        |   |         |        |
|----------------------------------------|----|-------------------------------------------------------------|--------------------------------------|------|----|----|--------|------------------------------------------------------------|---------|---------|--------|---|---------|--------|
| P07996 TSP1_HUMAN Thrombospondin-1     | 50 | Carbamidomethyl+C(6); Carbamidomethyl+C(10);Oxidation+M(16) | DLQAICGISCDELSSMVLELR                | 264  | 21 | 5  | 21     | b8y8y10y12*y12                                             | 2425.15 | 104.461 | 2782   | 2 | 1213.08 | 5.74   |
| P07996 TSP1_HUMAN Thrombospondin-1     | 51 | Carbamidomethyl+C(2); Carbamidomethyl+C(14);Oxidation+M(9)  | LCNSPSPQMNGKPCGEAR                   | 460  | 19 | 4  | 14.47  | b8*b8y8y10                                                 | 2147.91 | 107.829 | 1938   | 3 | 716.64  | -5.80  |
| P07996 TSP1_HUMAN Thrombospondin-1     | 52 |                                                             | LWHTGNTPGQVR                         | 1079 | 12 | 1  | 7.27   | b8                                                         | 1365.69 | 45.081  | 4727   | 2 | 683.35  | -10.10 |
| P07996 TSP1_HUMAN Thrombospondin-1     | 53 | Carbamidomethyl+C(1); Carbamidomethyl+C(6)                  | CHIQECDKR                            | 422  | 9  | 2  | 22.02  | b3b4                                                       | 1245.53 | 14.213  | 4274   | 3 | 415.85  | -10.49 |
| P07996 TSP1_HUMAN Thrombospondin-1     | 54 |                                                             | GSQPFQGGVEHATANK                     | 625  | 16 | 6  | 34.14  | b3b7*b7*b7b1b1b13                                          | 1627.77 | 44.518  | 2855   | 2 | 814.39  | -10.12 |
| P07996 TSP1_HUMAN Thrombospondin-1     | 55 |                                                             | VMYEGKK                              | 1123 | 7  | 0  | 1.29   |                                                            | 854.44  | 24.054  | 1527   | 2 | 427.72  | -10.43 |
| P07996 TSP1_HUMAN Thrombospondin-1     | 56 |                                                             | GTLLALER                             | 101  | 8  | 0  | 1.29   |                                                            | 854.51  | 56.442  | 6406   | 2 | 427.76  | 0.93   |
| Q9H4B7 TBB1_HUMAN Tubulin beta-1 chain | 1  |                                                             | AVLVDLEPGTMD SIR                     | 62   | 15 | 8  | 61.55  | b3b6y3y8y10y11y12y15                                       | 1615.84 | 74.324  | 175644 | 2 | 808.42  | 3.93   |
| Q9H4B7 TBB1_HUMAN Tubulin beta-1 chain | 2  |                                                             | LAVNMVFPFR                           | 252  | 10 | 10 | 85.76  | b2b5*b5y4y5y6y7y8y9y10                                     | 1143.63 | 72.182  | 134998 | 2 | 572.32  | -5.34  |
| Q9H4B7 TBB1_HUMAN Tubulin beta-1 chain | 3  |                                                             | ALSVAELTQQMFDAR                      | 282  | 15 | 24 | 221.31 | b1b2b4*b4b5b7*b7b9b1b13b14y2y3y4y5y6*y6y7y8y10y11y12y13y15 | 1679.84 | 91.710  | 104385 | 2 | 840.43  | 0.51   |
| Q9H4B7 TBB1_HUMAN Tubulin beta-1 chain | 4  |                                                             | LHFFMPGFAPLTAQGSQQYR                 | 262  | 20 | 22 | 142.1  | b2b3b4b5b7b9b10b13b15*b15y1y2y5y7*y7y8y9y11*y11y13y15y20   | 2296.13 | 87.917  | 74976  | 3 | 766.05  | -2.13  |
| Q9H4B7 TBB1_HUMAN Tubulin beta-1 chain | 5  |                                                             | IMNSFSVMPSPK                         | 162  | 12 | 14 | 77.08  | b2b3b9*b9*b9y2y5*y5y7y9y10y11*y11y12                       | 1337.66 | 62.981  | 69814  | 2 | 669.33  | 1.92   |
| Q9H4B7 TBB1_HUMAN Tubulin beta-1 chain | 6  | Carbamidomethyl+C(4)                                        | NSSCFVEWIPNNVK                       | 336  | 14 | 11 | 58.97  | b1b2b9*b9y3y5y7y8y11*y11y14                                | 1693.81 | 74.818  | 65566  | 2 | 847.41  | 7.50   |
| Q9H4B7 TBB1_HUMAN Tubulin beta-1 chain | 7  | Carbamidomethyl+C(6); Carbamidomethyl+C(8)                  | HESESCDCLQGFQIVHSLGGGTGSGMGTLLMNK    | 121  | 33 | 7  | 22.75  | y2y4y14*y14y15*y15*y15                                     | 3507.57 | 82.208  | 57605  | 4 | 877.65  | -2.58  |
| Q9H4B7 TBB1_HUMAN Tubulin beta-1 chain | 8  |                                                             | GASALQLER                            | 37   | 9  | 4  | 29.76  | b3y4y7y9                                                   | 944.52  | 40.467  | 53558  | 2 | 472.76  | -0.71  |
| Q9H4B7 TBB1_HUMAN Tubulin beta-1 chain | 9  |                                                             | LTTPYGDNLHLVSLTMSGITSLR              | 216  | 25 | 13 | 87.28  | b2b12y1y4y5y7y8y9y10y12y13y22y25                           | 2691.39 | 107.219 | 52060  | 3 | 897.80  | -2.90  |
| Q9H4B7 TBB1_HUMAN Tubulin beta-1 chain | 10 | Carbamidomethyl+C(6)                                        | YLTVACIFR                            | 309  | 9  | 3  | 37.54  | y4y5y7                                                     | 1142.60 | 79.852  | 44519  | 2 | 571.80  | -1.82  |
| Q9H4B7 TBB1_HUMAN Tubulin beta-1 chain | 11 |                                                             | GHYTEGAELIENVLEVVR                   | 103  | 18 | 7  | 28.38  | b2b3b9y1y2y7y8                                             | 2028.02 | 99.196  | 42400  | 3 | 676.68  | -7.52  |
| Q9H4B7 TBB1_HUMAN Tubulin beta-1 chain | 12 |                                                             | EVDQQLLSVQTR                         | 324  | 12 | 8  | 59.94  | y2y3*y3y4y5y6y10y12                                        | 1415.75 | 52.370  | 40303  | 2 | 708.38  | 2.93   |
| Q9H4B7 TBB1_HUMAN Tubulin beta-1 chain | 13 |                                                             | IREEYPDR                             | 154  | 8  | 8  | 48.29  | b2b3b4b7*b7y1y4y8                                          | 1077.53 | 24.134  | 32991  | 2 | 539.27  | 1.02   |
| Q9H4B7 TBB1_HUMAN Tubulin beta-1 chain | 14 | Carbamidomethyl+C(10)                                       | EIVHIQIGCGCNQIGAK                    | 2    | 17 | 6  | 22.78  | b11*b11y7y8*y8y17                                          | 1864.97 | 55.836  | 12309  | 2 | 932.99  | 2.68   |
| Q9H4B7 TBB1_HUMAN Tubulin beta-1 chain | 15 |                                                             | LGALFPDPSFVHGNSGAGNNWAK              | 80   | 23 | 4  | 12.68  | b3b15*b15y12                                               | 2387.12 | 68.323  | 8217   | 3 | 796.38  | -14.63 |
| Q9H4B7 TBB1_HUMAN Tubulin beta-1 chain | 16 |                                                             | AFVHWYTSEGMDINEFGAENNIHDLVSEYQQFQDAK | 392  | 37 | 5  | 10.87  | b13y10*y10y12*y12                                          | 4361.98 | 87.925  | 6146   | 3 | 1454.67 | 10.75  |

|                                         |    |                                                                         |                                            |     |    |    |       |                                              |         |         |        |   |         |        |
|-----------------------------------------|----|-------------------------------------------------------------------------|--------------------------------------------|-----|----|----|-------|----------------------------------------------|---------|---------|--------|---|---------|--------|
| Q9H4B7 TBB1_HUMAN Tubulin beta-1 chain  | 17 |                                                                         | FWEMIGEEHGIDLAGSDR                         | 19  | 18 | 5  | 24.05 | b11y3°y3y6y13                                | 2061.96 | 83.581  | 4112   | 4 | 516.24  | 10.89  |
| Q9H4B7 TBB1_HUMAN Tubulin beta-1 chain  | 18 |                                                                         | ISVYYNEAYGR                                | 46  | 11 | 4  | 26.64 | b9b10y7*y7                                   | 1334.61 | 39.377  | 144229 | 2 | 667.81  | -17.93 |
| Q9H4B7 TBB1_HUMAN Tubulin beta-1 chain  | 19 | Carbamidomethyl+C(6)                                                    | NTMAACDLR                                  | 297 | 9  | 4  | 29.76 | b5°b5y7y8                                    | 1051.47 | 33.692  | 12112  | 2 | 526.24  | 4.53   |
| Q9H4B7 TBB1_HUMAN Tubulin beta-1 chain  | 20 |                                                                         | MSTK                                       | 320 | 4  | 1  | 12.51 | b3                                           | 466.23  | 36.162  | 2269   | 1 | 466.23  | 1.31   |
| Q9H4B7 TBB1_HUMAN Tubulin beta-1 chain  | 21 |                                                                         | VSEHFSAMFK                                 | 380 | 10 | 4  | 27.97 | b8y8y9°y9                                    | 1182.56 | 54.882  | 1701   | 1 | 1182.56 | -2.68  |
| Q9H4B7 TBB1_HUMAN Tubulin beta-1 chain  | 22 | Carbamidomethyl+C(4)                                                    | VAVCDIPPRGLSMAATFIGNNTAI<br>QEIFNR         | 350 | 30 | 6  | 16.07 | b4b7°b7b12y12°y12                            | 3275.65 | 103.176 | 16349  | 3 | 1092.55 | -4.99  |
| Q9H4B7 TBB1_HUMAN Tubulin beta-1 chain  | 23 |                                                                         | KAFVHWYTSEGMDINEFGAEENN<br>IHDLVSEYQQFQDAK | 391 | 38 | 4  | 10.89 | b4y4y12*y12                                  | 4490.02 | 83.510  | 2025   | 3 | 1497.35 | -2.07  |
| Q9H4B7 TBB1_HUMAN Tubulin beta-1 chain  | 24 | Phosphoryl STY(8)                                                       | ALSVAELTQQMFDAR                            | 282 | 15 | 4  | 17.57 | b6°b6b8y11_HPO3 y11                          | 1759.82 | 89.965  | 2951   | 2 | 880.41  | 10.82  |
| Q9H4B7 TBB1_HUMAN Tubulin beta-1 chain  | 25 | Oxidation+M(11)                                                         | ALSVAELTQQMFDAR                            | 282 | 15 | 4  | 25.65 | y4y9y13*y13                                  | 1695.85 | 54.950  | 8077   | 2 | 848.43  | 9.50   |
| Q9H4B7 TBB1_HUMAN Tubulin beta-1 chain  | 26 | Oxidation+M(2)                                                          | IMNSFSVMPSPK                               | 162 | 12 | 3  | 21.63 | b3b7y3                                       | 1353.66 | 63.025  | 2790   | 2 | 677.33  | 2.98   |
| Q9H4B7 TBB1_HUMAN Tubulin beta-1 chain  | 27 | Oxidation+M(8)                                                          | VSEHFSAMFK                                 | 380 | 10 | 3  | 26.21 | b4y3y9                                       | 1198.56 | 42.240  | 2255   | 2 | 599.78  | 0.92   |
| Q9H4B7 TBB1_HUMAN Tubulin beta-1 chain  | 28 |                                                                         | SVAELTQQMFDAR                              | 284 | 13 | 0  | 4.3   |                                              | 1495.72 | 91.651  | 2855   | 2 | 748.36  | -0.73  |
| P02675 FIBB_HUMAN Fibrinogen beta chain | 1  |                                                                         | IRPFFPQQ                                   | 483 | 8  | 8  | 91.89 | b2b4b5b6b7y3y4y6                             | 1032.56 | 60.352  | 166971 | 2 | 516.78  | -4.97  |
| P02675 FIBB_HUMAN Fibrinogen beta chain | 2  | Carbamidomethyl+C(3);<br>Carbamidomethyl+C(7)                           | TPCTVSCNIPVVSQK                            | 224 | 15 | 14 | 91.42 | b9b11°b11y1y3y4y6y10<br>y11*y11y12y13*y13y15 | 1618.80 | 51.073  | 128678 | 2 | 809.91  | 6.11   |
| P02675 FIBB_HUMAN Fibrinogen beta chain | 3  |                                                                         | DNENVVNEYSSELEK                            | 163 | 15 | 5  | 38.8  | b5y4y7y8y10                                  | 1768.80 | 59.764  | 123504 | 2 | 884.90  | 5.66   |
| P02675 FIBB_HUMAN Fibrinogen beta chain | 4  |                                                                         | QDGSVDFGR                                  | 285 | 9  | 3  | 45.32 | y3y5y7                                       | 980.45  | 33.962  | 89943  | 2 | 490.73  | 2.37   |
| P02675 FIBB_HUMAN Fibrinogen beta chain | 5  | Carbamidomethyl+C(3)                                                    | VYCDMNTENGWTVIQNR                          | 267 | 18 | 9  | 48.09 | b14y2y3*y3y4y5y9y13y<br>18                   | 2156.97 | 62.051  | 79977  | 2 | 1078.99 | 8.49   |
| P02675 FIBB_HUMAN Fibrinogen beta chain | 6  |                                                                         | EDGGGWYNR                                  | 426 | 10 | 3  | 33.2  | y3y4y8                                       | 1239.52 | 61.533  | 68542  | 2 | 620.27  | 4.63   |
| P02675 FIBB_HUMAN Fibrinogen beta chain | 7  | Carbamidomethyl+C(3)                                                    | NYCGLPGEYWLGNNDK                           | 313 | 15 | 3  | 17.57 | b5y5y10                                      | 1785.81 | 74.284  | 60819  | 2 | 893.41  | 13.53  |
| P02675 FIBB_HUMAN Fibrinogen beta chain | 8  |                                                                         | GGETSEMYLIQPDSSVKPYR                       | 247 | 20 | 8  | 31.21 | b2b3y1y10y11y13y17y2<br>0                    | 2257.09 | 61.460  | 50280  | 3 | 753.03  | 2.70   |
| P02675 FIBB_HUMAN Fibrinogen beta chain | 9  |                                                                         | REEAPSLRPAPPISGGGYR                        | 52  | 20 | 10 | 64.33 | b2b4°b4b9b10y3y4y5y6<br>y20                  | 2107.08 | 47.729  | 42603  | 4 | 527.53  | -10.89 |
| P02675 FIBB_HUMAN Fibrinogen beta chain | 10 |                                                                         | AHYGGFTVQNEANK                             | 353 | 14 | 11 | 78.96 | b2b3b7b11y6°y6y7y10y<br>11y12y14             | 1535.73 | 38.336  | 32792  | 2 | 768.37  | 1.75   |
| P02675 FIBB_HUMAN Fibrinogen beta chain | 11 | Carbamidomethyl+C(3);<br>Carbamidomethyl+C(7);<br>Carbamidomethyl+C(17) | TPCTVSCNIPVVSQKCEEEIIR                     | 224 | 22 | 6  | 37.46 | y3y9y10y13y17y22                             | 2548.23 | 60.912  | 27068  | 3 | 850.08  | 3.54   |
| P02675 FIBB_HUMAN Fibrinogen beta chain | 12 |                                                                         | QGFQNVATNTDQK                              | 300 | 13 | 8  | 60.88 | b7b10y1y4y6y8y10y13                          | 1308.62 | 35.565  | 22546  | 2 | 654.81  | 1.21   |
| P02675 FIBB_HUMAN Fibrinogen beta chain | 13 |                                                                         | NSVDELNNNVEAVSQTSSSFQY<br>MYLLK            | 124 | 28 | 10 | 27.06 | b2°b2b3b10y2y4y6y10y<br>15y28                | 3167.50 | 88.794  | 14373  | 2 | 1584.26 | 6.71   |
| P02675 FIBB_HUMAN Fibrinogen beta chain | 14 |                                                                         | TMTIHNGMFFSTYDR                            | 395 | 15 | 3  | 17.57 | b3y9y13                                      | 1820.80 | 82.413  | 8976   | 3 | 607.60  | -7.11  |
| P02675 FIBB_HUMAN Fibrinogen beta chain | 15 | Carbamidomethyl+C(2)                                                    | ECEEIIRK                                   | 239 | 8  | 6  | 53.06 | b3b6y2y3y7y8                                 | 1076.54 | 25.879  | 8041   | 2 | 538.77  | -3.06  |
| P02675 FIBB_HUMAN Fibrinogen beta chain | 16 |                                                                         | QVKDNENVVNEYSSELEK                         | 160 | 18 | 6  | 29.94 | b4b7y9y13y15°y15                             | 2124.03 | 65.276  | 4044   | 3 | 708.68  | 9.66   |

|                                               |    |                                                                          |                                      |     |    |    |        |                                                                |         |         |        |   |         |        |
|-----------------------------------------------|----|--------------------------------------------------------------------------|--------------------------------------|-----|----|----|--------|----------------------------------------------------------------|---------|---------|--------|---|---------|--------|
| [P02675]FIBB_HUMAN Fibrinogen beta chain      | 17 |                                                                          | HGTDDGVVWMNWK                        | 458 | 13 | 8  | 66.26  | b3b6b7b8y7*y7y11y12                                            | 1544.71 | 70.525  | 56148  | 2 | 772.86  | 10.98  |
| [P02675]FIBB_HUMAN Fibrinogen beta chain      | 18 | Carbamidomethyl+C(12)                                                    | LESADVSAQMEYCR                       | 211 | 13 | 7  | 51.55  | b4b8*b8b9y3y4y10                                               | 1587.71 | 76.312  | 52396  | 2 | 794.36  | 21.84  |
| [P02675]FIBB_HUMAN Fibrinogen beta chain      | 19 |                                                                          | YQISVNK                              | 367 | 7  | 7  | 39.69  | b4*b4b6*b6*b6y4*y4                                             | 851.44  | 41.098  | 29736  | 1 | 851.44  | -21.93 |
| [P02675]FIBB_HUMAN Fibrinogen beta chain      | 20 |                                                                          | EEAPSLRPAPPISGGGYR                   | 53  | 19 | 11 | 106.2  | b9*b9y3y5y6y7y8y9y10y12y16                                     | 1951.01 | 51.437  | 24713  | 2 | 976.01  | 5.44   |
| [P02675]FIBB_HUMAN Fibrinogen beta chain      | 21 |                                                                          | GTAGNALMDGASQLMGENR                  | 376 | 19 | 5  | 25.13  | b8y10y11y14*y14                                                | 1892.89 | 74.762  | 6776   | 3 | 631.64  | 18.38  |
| [P02675]FIBB_HUMAN Fibrinogen beta chain      | 22 |                                                                          | MVSWSFHK                             | 3   | 8  | 3  | 35.35  | b3b6y6                                                         | 1021.49 | 45.109  | 3978   | 2 | 511.25  | -5.56  |
| [P02675]FIBB_HUMAN Fibrinogen beta chain      | 23 |                                                                          | DNDGWLTSDPR                          | 410 | 11 | 3  | 30.62  | y7y8y10                                                        | 1275.58 | 70.462  | 2921   | 2 | 638.29  | 12.54  |
| [P02675]FIBB_HUMAN Fibrinogen beta chain      | 24 |                                                                          | MGPTELLIEMEDWK                       | 334 | 14 | 7  | 44.27  | b5b10*b10b11b12*b12y9                                          | 1691.80 | 120.168 | 1920   | 2 | 846.40  | -2.96  |
| [P02675]FIBB_HUMAN Fibrinogen beta chain      | 25 | Carbamidomethyl+C(8);<br>Carbamidomethyl+C(19);<br>Carbamidomethyl+C(23) | KAPDAGGCLHADPDLGVLCPGTCQLQEALLQERPIR | 87  | 37 | 17 | 123.59 | b4b11b16*b16b17b18b19y3y10y12y17y18y19y20y21y23y25             | 4083.97 | 78.367  | 169635 | 5 | 817.60  | -10.16 |
| [P02675]FIBB_HUMAN Fibrinogen beta chain      | 26 |                                                                          | KGGETSEMYLIQPDSSVKPYR                | 246 | 21 | 8  | 52.95  | b7b8b10b11*b11y3y7y9                                           | 2385.15 | 56.873  | 143225 | 4 | 597.04  | -11.05 |
| [P02675]FIBB_HUMAN Fibrinogen beta chain      | 27 |                                                                          | MGPTELLIEMEDWKGDK                    | 334 | 17 | 10 | 65.66  | b7b11b13y3*y3y5y6y11*y11y12                                    | 1991.93 | 89.906  | 83791  | 3 | 664.65  | -6.13  |
| [P02675]FIBB_HUMAN Fibrinogen beta chain      | 28 |                                                                          | VKAHYGGFTVQNEANK                     | 351 | 16 | 6  | 34.25  | y4*y4*y4y5y11y13                                               | 1762.90 | 80.635  | 29590  | 2 | 881.96  | 9.63   |
| [P02675]FIBB_HUMAN Fibrinogen beta chain      | 29 | Carbamidomethyl+C(16)                                                    | QGFGNVATNTDGNKYCGLPGEYWLGNDK         | 300 | 28 | 8  | 33.91  | b7b12b13b19y6y11y13*y13                                        | 3075.41 | 68.880  | 13070  | 3 | 1025.81 | 7.38   |
| [P02675]FIBB_HUMAN Fibrinogen beta chain      | 30 | Carbamidomethyl+C(3)                                                     | NYCGLPGEYWLGNDKISQLTR                | 313 | 21 | 3  | 20.1   | y12y16y19                                                      | 2484.22 | 79.057  | 9287   | 2 | 1242.61 | 9.73   |
| [P02675]FIBB_HUMAN Fibrinogen beta chain      | 31 |                                                                          | DNENVVNEYSSLEKHLQYIDETVNSNIPTNLR     | 163 | 33 | 4  | 22.8   | b5b9b12b24                                                     | 3876.86 | 83.492  | 7815   | 3 | 1292.96 | 2.14   |
| [P02675]FIBB_HUMAN Fibrinogen beta chain      | 32 |                                                                          | RMVSWFHK                             | 2   | 9  | 3  | 29.76  | b6y5y6                                                         | 1177.61 | 61.408  | 7218   | 2 | 589.31  | 11.71  |
| [P02675]FIBB_HUMAN Fibrinogen beta chain      | 33 | Carbamidomethyl+C(1)                                                     | CHAANPNGRYYWGGQYTDMAK                | 436 | 22 | 7  | 17.5   | b11*b11b16*b16y8y11*y11                                        | 2646.15 | 124.752 | 4947   | 2 | 1323.58 | 4.24   |
| [P02675]FIBB_HUMAN Fibrinogen beta chain      | 34 | Phosphoryl STY(14)                                                       | EEAPSLRPAPPISGGGYR                   | 53  | 19 | 3  | 21.43  | b7b13b15                                                       | 2030.94 | 115.942 | 7349   | 3 | 677.65  | -11.84 |
| [P02675]FIBB_HUMAN Fibrinogen beta chain      | 35 | Phosphoryl STY(8)                                                        | HQLYIDETVNSNIPTNLR                   | 178 | 18 | 5  | 24.01  | b5b6*b6*b6b9                                                   | 2207.04 | 43.561  | 2443   | 2 | 1104.02 | 0.00   |
| [P02675]FIBB_HUMAN Fibrinogen beta chain      | 36 | Oxidation+M(24)                                                          | NSVDELNNNVEAVSQTSSSSFQYMYLLK         | 124 | 28 | 4  | 11.47  | b8*b8b22y11                                                    | 3183.44 | 82.200  | 129354 | 4 | 796.62  | -11.12 |
| [P02675]FIBB_HUMAN Fibrinogen beta chain      | 37 | Oxidation+M(1)                                                           | MGPTELLIEMEDWK                       | 334 | 14 | 8  | 47.28  | b4b6*b6b10*b10b12y8*y8                                         | 1707.81 | 92.740  | 2784   | 2 | 854.41  | 9.01   |
| [P02675]FIBB_HUMAN Fibrinogen beta chain      | 38 | Oxidation+M()                                                            | TMTIHNGMFFSTYDRDNDGWLTSDPR           | 395 | 26 | 4  | 17.72  | b12y9y12y14                                                    | 3093.39 | 68.868  | 2126   | 4 | 774.10  | 13.02  |
| [P02675]FIBB_HUMAN Fibrinogen beta chain      | 39 |                                                                          | REEAPSLRPAP                          | 52  | 11 | 1  | 7.64   | y3                                                             | 1222.64 | 47.716  | 19381  | 2 | 611.82  | -11.08 |
| [P02675]FIBB_HUMAN Fibrinogen beta chain      | 40 | Carbamidomethyl+C(2)                                                     | ECEEIIRK                             | 239 | 8  | 0  | 1.29   |                                                                | 1058.51 | 25.881  | 1556   | 3 | 353.51  | -9.92  |
| [P60660]MYL6_HUMAN Myosin light polypeptide 6 | 1  |                                                                          | VLDFEHFLPMLQTVAK                     | 63  | 16 | 20 | 140.73 | b2b3b4b6b8b10*b10y1y2y3y4*y4y5*y5y6y8y10y14y15y16              | 1887.98 | 101.757 | 213638 | 3 | 630.00  | -11.96 |
| [P60660]MYL6_HUMAN Myosin light polypeptide 6 | 2  |                                                                          | ALGQNPTNAEVLK                        | 37  | 13 | 22 | 130.24 | b2b3b4b5*b5b10*b10*b10b11*b11b12*b12y1y2y3y7y8y9y11*y11y13*y13 | 1354.73 | 44.624  | 193615 | 2 | 677.87  | -1.08  |

|                                                          |    |                       |                                   |     |    |    |        |                                                                |         |         |        |   |         |        |
|----------------------------------------------------------|----|-----------------------|-----------------------------------|-----|----|----|--------|----------------------------------------------------------------|---------|---------|--------|---|---------|--------|
| [P60660]MYL6_HUMAN Myosin light polypeptide 6            | 3  |                       | EAFQLFDR                          | 13  | 8  | 6  | 40.12  | y1y2y3y4y6y8                                                   | 1025.50 | 68.277  | 126594 | 2 | 513.25  | -4.76  |
| [P60660]MYL6_HUMAN Myosin light polypeptide 6            | 4  | Carbamidomethyl+C(6)  | ILYSQCGDVMR                       | 26  | 11 | 11 | 80.24  | b2y2y3y5y6y7y8y9*y9y11*y11                                     | 1341.63 | 48.234  | 119833 | 2 | 671.32  | 2.18   |
| [P60660]MYL6_HUMAN Myosin light polypeptide 6            | 5  |                       | VFDKEGNGTVMGAEIR                  | 94  | 16 | 15 | 81.18  | b1b6b9*b9b11*b11y3y5y6y7y11*y11y12*y12y16                      | 1722.83 | 49.359  | 89844  | 3 | 574.95  | -9.14  |
| [P60660]MYL6_HUMAN Myosin light polypeptide 6            | 6  |                       | NKDQGTYYEDYVEGLR                  | 79  | 15 | 7  | 64.18  | y3y5y6y7y12y13y15                                              | 1786.82 | 55.838  | 60404  | 3 | 596.28  | -4.85  |
| [P60660]MYL6_HUMAN Myosin light polypeptide 6            | 7  |                       | EGNGTVMGAEIR                      | 98  | 12 | 7  | 34.85  | b12y5*y5y6y7*y7y12                                             | 1233.59 | 43.043  | 44080  | 2 | 617.30  | 4.45   |
| [P60660]MYL6_HUMAN Myosin light polypeptide 6            | 8  |                       | VFDK                              | 94  | 4  | 1  | 12.51  | b3                                                             | 508.27  | 59.143  | 9500   | 1 | 508.27  | -4.68  |
| [P60660]MYL6_HUMAN Myosin light polypeptide 6            | 9  |                       | EAFQLFDRTGDGK                     | 13  | 13 | 3  | 24.79  | b5b6y4                                                         | 1483.73 | 79.309  | 42909  | 2 | 742.37  | 6.09   |
| [P60660]MYL6_HUMAN Myosin light polypeptide 6            | 10 |                       | VFDKEGNGTVMGAEIR                  | 94  | 16 | 5  | 27.52  | b6y6y12*y12y13                                                 | 1722.85 | 109.449 | 33832  | 2 | 861.93  | 0.50   |
| [P60660]MYL6_HUMAN Myosin light polypeptide 6            | 11 | Carbamidomethyl+C(11) | TGDGKILYSQCGDVMR                  | 21  | 16 | 11 | 43.6   | b6b12*b12*b12b13*b13b15*b15y3y10*y10                           | 1799.83 | 62.986  | 6310   | 2 | 900.42  | -8.21  |
| [P60660]MYL6_HUMAN Myosin light polypeptide 6            | 12 | Phosphoryl STY(5)     | HVLVTLGEK                         | 110 | 9  | 4  | 29.76  | b7y3y6_H3PO4 y6*y6                                             | 1075.55 | 82.142  | 1573   | 1 | 1075.55 | 1.70   |
| [P60660]MYL6_HUMAN Myosin light polypeptide 6            | 13 | Oxidation+M(7)        | EGNGTVMGAEIR                      | 98  | 12 | 6  | 25.61  | b5*b5b6*b6*b6y7                                                | 1249.58 | 22.792  | 3950   | 2 | 625.29  | -1.27  |
| [P60660]MYL6_HUMAN Myosin light polypeptide 6            | 14 |                       | PMLQTVAK                          | 71  | 8  | 3  | 20.62  | b3b4*b4                                                        | 887.50  | 101.754 | 2103   | 2 | 444.25  | -0.89  |
| [P60660]MYL6_HUMAN Myosin light polypeptide 6            | 15 |                       | EAFQLFDR                          | 13  | 8  | 2  | 9.46   | y5*y5                                                          | 1007.50 | 68.252  | 13651  | 2 | 504.25  | 8.84   |
| [P24844]MYL9_HUMAN Myosin regulatory light polypeptide 9 | 1  |                       | LNGTDPEDVIR                       | 93  | 11 | 11 | 85.4   | b4y1y3y4y5*y5y6y8y9*y9y11                                      | 1228.62 | 48.404  | 143043 | 2 | 614.81  | -0.50  |
| [P24844]MYL9_HUMAN Myosin regulatory light polypeptide 9 | 2  |                       | GNFNYYVEFTR                       | 151 | 10 | 11 | 56.07  | b4b5b6b10y2*y2y7*y7y8y10*y10                                   | 1246.57 | 40.177  | 130751 | 2 | 623.79  | -10.77 |
| [P24844]MYL9_HUMAN Myosin regulatory light polypeptide 9 | 3  |                       | ATSNVFAMFDQSQIQEFK                | 17  | 18 | 13 | 83.67  | b2b5b14y2y3y4*y4y5y9y10y12y13y18                               | 2091.00 | 89.442  | 84529  | 2 | 1046.00 | 6.31   |
| [P24844]MYL9_HUMAN Myosin regulatory light polypeptide 9 | 4  |                       | ELLTIMGDR                         | 124 | 9  | 5  | 53.49  | y3y5y6y7y9                                                     | 1035.51 | 48.441  | 27852  | 2 | 518.26  | -6.01  |
| [P24844]MYL9_HUMAN Myosin regulatory light polypeptide 9 | 5  |                       | FTDEEVDEMYR                       | 133 | 11 | 4  | 46.57  | y4y5y6y10                                                      | 1433.62 | 53.621  | 26917  | 2 | 717.31  | 20.69  |
| [P24844]MYL9_HUMAN Myosin regulatory light polypeptide 9 | 6  |                       | EDLHDMLASLGK                      | 51  | 12 | 3  | 25.61  | b3b4y5                                                         | 1328.64 | 78.070  | 10573  | 3 | 443.55  | -11.58 |
| [P24844]MYL9_HUMAN Myosin regulatory light polypeptide 9 | 7  |                       | NPTDEYLEGMMSEAPGPINFMTMFLTMFGEK   | 63  | 30 | 4  | 35.88  | y5y9y10y11                                                     | 3397.58 | 120.181 | 2377   | 4 | 850.15  | 19.26  |
| [P24844]MYL9_HUMAN Myosin regulatory light polypeptide 9 | 8  |                       | ELLTIMGDRFTDEEVDEMYR              | 124 | 20 | 3  | 13.93  | b7y11y17                                                       | 2450.10 | 75.771  | 31540  | 3 | 817.37  | 6.48   |
| [P24844]MYL9_HUMAN Myosin regulatory light polypeptide 9 | 9  | Carbamidomethyl+C(16) | LNGTDPEDVIRNAFACFDDEEASGF IHEDHLR | 93  | 31 | 3  | 11.09  | b6b16y12                                                       | 3574.68 | 113.659 | 2540   | 3 | 1192.23 | 13.25  |
| [P24844]MYL9_HUMAN Myosin regulatory light polypeptide 9 | 10 | Phosphoryl STY(10)    | FTDEEVDEMYR                       | 133 | 11 | 8  | 54.28  | b7*b7b8b9*b9y5_H3PO4 y5y6*y6                                   | 1513.56 | 16.833  | 3253   | 2 | 757.29  | 11.21  |
| [P24844]MYL9_HUMAN Myosin regulatory light polypeptide 9 | 11 | Oxidation+M()         | ATSNVFAMFDQSQIQEFK                | 17  | 18 | 6  | 33.6   | b4b5b7b9y13*y13                                                | 2106.98 | 107.888 | 23821  | 2 | 1053.99 | 0.58   |
| [P63104]1433Z_HUMAN 14-3-3 protein zeta/delta            | 1  |                       | FLIPNASQAESK                      | 103 | 12 | 11 | 89.93  | b2b3y2y3y4*y4y6y7y9y10y12                                      | 1304.69 | 55.034  | 129876 | 2 | 652.85  | 1.40   |
| [P63104]1433Z_HUMAN 14-3-3 protein zeta/delta            | 2  | Carbamidomethyl+C(3)  | DICNDVLSLLEK                      | 91  | 12 | 7  | 69.81  | b3b4b10y5y6y7y10                                               | 1418.72 | 98.359  | 113606 | 2 | 709.86  | -1.12  |
| [P63104]1433Z_HUMAN 14-3-3 protein zeta/delta            | 3  |                       | SVTEQGAELSNEER                    | 27  | 14 | 21 | 120.68 | b8b10*b10b12b13y2y4y5*y5y7y9*y9*y9y10*y10y11*y11*y11y12*y12y14 | 1548.72 | 34.223  | 93401  | 2 | 774.86  | 3.63   |

|                                              |    |                                                |                               |     |    |    |        |                                                      |         |         |         |   |         |        |
|----------------------------------------------|----|------------------------------------------------|-------------------------------|-----|----|----|--------|------------------------------------------------------|---------|---------|---------|---|---------|--------|
| P63104 1433Z_HUMAN 14-3-3 protein zeta/delta | 4  |                                                | GIVDQSQAYQEAFEISKK            | 139 | 19 | 11 | 70.62  | b2b3b19y3y4y9y11y12y14y16y19                         | 2169.07 | 67.827  | 85440   | 3 | 723.70  | -3.49  |
| P63104 1433Z_HUMAN 14-3-3 protein zeta/delta | 5  |                                                | YLAEVAAGDDDK                  | 127 | 12 | 8  | 77.66  | y2y3y6y7y8y9y10y12                                   | 1279.66 | 32.281  | 43196   | 2 | 640.33  | 3.53   |
| P63104 1433Z_HUMAN 14-3-3 protein zeta/delta | 6  |                                                | TAFDEAIAELDTLSEESYKDSTLIMQLLR | 193 | 29 | 11 | 57.57  | b4b6b9b11°b11b12y2y4y5y6y29                          | 3302.62 | 136.608 | 27233   | 4 | 826.41  | -5.32  |
| P63104 1433Z_HUMAN 14-3-3 protein zeta/delta | 7  |                                                | YLAEVAAGDDDK                  | 127 | 11 | 4  | 23.63  | b4b7°b7y10                                           | 1151.55 | 33.996  | 5928    | 2 | 576.28  | -6.36  |
| P63104 1433Z_HUMAN 14-3-3 protein zeta/delta | 8  |                                                | GIVDQSQAYQEAFEISK             | 139 | 18 | 13 | 86.53  | b4b5°b5b6b8b9b16y3y7y9°y9y12*y12                     | 2041.02 | 71.932  | 45934   | 2 | 1021.01 | 13.76  |
| P63104 1433Z_HUMAN 14-3-3 protein zeta/delta | 9  |                                                | TAFDEAIAELDTLSEESYK           | 193 | 19 | 12 | 75.86  | b3°b3b6b7b12b14y4y5y11°y11y12°y12                    | 2131.99 | 101.267 | 24608   | 2 | 1066.50 | 1.37   |
| P63104 1433Z_HUMAN 14-3-3 protein zeta/delta | 10 |                                                | DSTLIMQLLR                    | 212 | 10 | 3  | 26.21  | b6y3y5                                               | 1189.64 | 92.114  | 4310    | 1 | 1189.64 | -16.31 |
| P63104 1433Z_HUMAN 14-3-3 protein zeta/delta | 11 | Carbamidomethyl+C(14)                          | LAEQAERYDDMAACMK              | 11  | 16 | 3  | 24.32  | b6b9b12                                              | 1901.82 | 48.696  | 13902   | 3 | 634.61  | -1.60  |
| P63104 1433Z_HUMAN 14-3-3 protein zeta/delta | 12 |                                                | SVTEQGAELSNEERNLLSVAYK        | 27  | 22 | 3  | 13.05  | b13b15y11                                            | 2437.19 | 61.505  | 7383    | 3 | 813.07  | -14.02 |
| P63104 1433Z_HUMAN 14-3-3 protein zeta/delta | 13 |                                                | GDYYRYLAEVAAGDDDK             | 122 | 16 | 4  | 27.52  | b11y8y9y15                                           | 1805.85 | 78.989  | 6941    | 2 | 903.43  | 8.11   |
| P63104 1433Z_HUMAN 14-3-3 protein zeta/delta | 14 |                                                | KGIVDQSQAYQEAFEISK            | 138 | 19 | 3  | 14.47  | b9y9y11                                              | 2169.06 | 36.847  | 2192    | 3 | 723.69  | -8.10  |
| P63104 1433Z_HUMAN 14-3-3 protein zeta/delta | 15 | Phosphoryl STY(7)                              | FLIPNSQAESK                   | 103 | 12 | 6  | 36.33  | b6b9_HPO3<br>b9b11_H3PO4<br>b11_HPO3<br>b11°b11y5°y5 | 1384.64 | 54.917  | 16340   | 2 | 692.82  | -2.56  |
| P02768 ALBU_HUMAN Serum albumin              | 1  | Carbamidomethyl+C(3)                           | YICENQDSISSK                  | 286 | 12 | 17 | 88.77  | b2b3b9°b9b11b12y2°y2y3y4y9*y9y10°y10*y10y11y12       | 1443.65 | 32.801  | 1286701 | 2 | 722.33  | 3.13   |
| P02768 ALBU_HUMAN Serum albumin              | 2  |                                                | YLYEIAR                       | 161 | 7  | 15 | 91.46  | b1b2b3b5°b5b6y1y2y3y4°y4y5°y5y6y7                    | 927.48  | 51.314  | 1151970 | 2 | 464.25  | -11.19 |
| P02768 ALBU_HUMAN Serum albumin              | 3  | Carbamidomethyl+C(1);<br>Carbamidomethyl+C(2)  | CCTESLVNR                     | 499 | 9  | 16 | 100.49 | b2b3b4y2*y2y3*y3y4y5y6°y6*y6y7°y7y8y9                | 1138.50 | 31.583  | 272608  | 2 | 569.75  | 1.82   |
| P02768 ALBU_HUMAN Serum albumin              | 4  |                                                | VFDEFKPLVEEPQNLIK             | 396 | 17 | 6  | 15.8   | b2b3°b3b6y2y14                                       | 2045.08 | 82.075  | 102415  | 3 | 682.36  | -8.54  |
| P02768 ALBU_HUMAN Serum albumin              | 5  |                                                | FQNALLVR                      | 426 | 8  | 5  | 40.12  | b2y3y4y6y8                                           | 960.56  | 55.021  | 89372   | 2 | 480.78  | -5.40  |
| P02768 ALBU_HUMAN Serum albumin              | 6  |                                                | LVNEVTEFAK                    | 65  | 10 | 10 | 75.83  | b2b4y1y3y5y6y8*y8y9y10                               | 1149.61 | 54.214  | 82254   | 2 | 575.31  | -2.55  |
| P02768 ALBU_HUMAN Serum albumin              | 7  |                                                | VPQVSTPTLVEVSR                | 438 | 14 | 9  | 72.43  | b3b4y3y9y10y11y12*y12y14                             | 1511.85 | 59.711  | 79751   | 2 | 756.43  | 2.02   |
| P02768 ALBU_HUMAN Serum albumin              | 8  | Carbamidomethyl+C(14)                          | ALVLIFAQYLQQCPFEDHVK          | 44  | 21 | 20 | 134.75 | b2b3b4b5b6y2y3y4y5y7°y7y8°y8y10°y10y12*y12y15y19y21  | 2490.27 | 107.944 | 72072   | 3 | 830.76  | -5.29  |
| P02768 ALBU_HUMAN Serum albumin              | 9  | Carbamidomethyl+C(3)                           | QNCELFEQLGEYK                 | 413 | 13 | 17 | 94.94  | b7b13°b13y2y3y4y5y7°y7°y7y8y9°y9y10°y10y13*y13       | 1657.76 | 70.536  | 65843   | 2 | 829.38  | 4.12   |
| P02768 ALBU_HUMAN Serum albumin              | 10 |                                                | AEFAEVSK                      | 249 | 8  | 7  | 48.29  | b2b3b8y3y4y6y8                                       | 880.44  | 32.465  | 53121   | 2 | 440.72  | -0.76  |
| P02768 ALBU_HUMAN Serum albumin              | 11 | Carbamidomethyl+C(6);<br>Carbamidomethyl+C(7)  | AAFTECCQAADK                  | 186 | 12 | 16 | 82.15  | b1b2b6°b6y1y2y3y6°y6y7y8y9y10°y10y12*y12             | 1371.57 | 30.859  | 49727   | 2 | 686.29  | 4.09   |
| P02768 ALBU_HUMAN Serum albumin              | 12 | Carbamidomethyl+C(9);<br>Carbamidomethyl+C(10) | ETYGEMADCCAK                  | 105 | 12 | 5  | 48.76  | y7y8y9y10y12                                         | 1434.54 | 35.378  | 49030   | 2 | 717.77  | 2.21   |
| P02768 ALBU_HUMAN Serum albumin              | 13 | Carbamidomethyl+C(2)                           | LCTVATLR                      | 97  | 8  | 4  | 40.12  | y3y4y6y8                                             | 933.52  | 43.078  | 34953   | 2 | 467.26  | -2.09  |

|                                 |    |                                                                         |                               |     |    |    |        |                                                                                                              |         |         |         |   |        |        |
|---------------------------------|----|-------------------------------------------------------------------------|-------------------------------|-----|----|----|--------|--------------------------------------------------------------------------------------------------------------|---------|---------|---------|---|--------|--------|
| P02768 ALBU_HUMAN Serum albumin | 14 | Carbamidomethyl+C(3)                                                    | RPCFSALEVDETYVVK              | 508 | 16 | 8  | 36.78  | b7b8b11b13y2y7y16                                                                                            | 1910.92 | 64.978  | 29047   | 3 | 637.65 | -4.66  |
| P02768 ALBU_HUMAN Serum albumin | 15 | Carbamidomethyl+C(2);<br>Carbamidomethyl+C(11)                          | TCVADESAENCDK                 | 75  | 13 | 11 | 110.89 | b2b4y4y5y6y7y8y9y10y11y13                                                                                    | 1498.58 | 21.154  | 27597   | 2 | 749.80 | 4.07   |
| P02768 ALBU_HUMAN Serum albumin | 16 | Carbamidomethyl+C(1);<br>Carbamidomethyl+C(2);<br>Carbamidomethyl+C(10) | CCAAADPHECYAK                 | 383 | 13 | 7  | 49.12  | b2b3y2y3y4y6y7                                                                                               | 1552.59 | 23.399  | 20621   | 3 | 518.20 | -5.43  |
| P02768 ALBU_HUMAN Serum albumin | 17 | Carbamidomethyl+C(1);<br>Carbamidomethyl+C(2);<br>Carbamidomethyl+C(12) | CCTESLVNRRPCFSALEVDETYVP<br>K | 499 | 25 | 5  | 21.64  | b1b11b12y9y25                                                                                                | 3030.39 | 67.547  | 16601   | 4 | 758.35 | -7.65  |
| P02768 ALBU_HUMAN Serum albumin | 18 |                                                                         | LVTDLTK                       | 257 | 7  | 8  | 65.57  | b5b6y4°y4y5°y5y6°y6                                                                                          | 789.46  | 37.903  | 943810  | 2 | 395.23 | -19.95 |
| P02768 ALBU_HUMAN Serum albumin | 19 |                                                                         | DLGEENFK                      | 36  | 8  | 4  | 32.34  | b5b6y4°y4                                                                                                    | 951.42  | 45.539  | 315892  | 2 | 476.21 | -21.49 |
| P02768 ALBU_HUMAN Serum albumin | 20 |                                                                         | DVFLGMFLYEYAR                 | 347 | 13 | 6  | 33.17  | b3b10°b10b12°b12y5                                                                                           | 1623.81 | 66.765  | 20427   | 3 | 541.94 | 11.80  |
| P02768 ALBU_HUMAN Serum albumin | 21 |                                                                         | HPYFYAPELFFAK                 | 169 | 14 | 5  | 30.66  | b4y4y9y11°y11                                                                                                | 1742.86 | 62.337  | 18599   | 3 | 581.62 | -21.08 |
| P02768 ALBU_HUMAN Serum albumin | 22 |                                                                         | SEVAHR                        | 28  | 6  | 2  | 29.33  | y3y5                                                                                                         | 698.35  | 29.759  | 6543    | 2 | 349.68 | -9.96  |
| P02768 ALBU_HUMAN Serum albumin | 23 |                                                                         | ADDK                          | 584 | 4  | 1  | 12.51  | y3                                                                                                           | 448.21  | 25.599  | 2618    | 1 | 448.21 | 9.60   |
| P02768 ALBU_HUMAN Serum albumin | 24 | Carbamidomethyl+C(14)                                                   | EFNAETFTFHADICTLSEK           | 524 | 19 | 3  | 14.47  | b8b10y4                                                                                                      | 2260.04 | 109.758 | 1954    | 3 | 754.02 | 9.72   |
| P02768 ALBU_HUMAN Serum albumin | 25 |                                                                         | KVPQVSTPTLVEVSR               | 437 | 15 | 32 | 211.31 | b4*b4b5*b5b6*b6b7°b7°<br>*b7b9°b9b10°b10y3y4°<br>y4y5°y5y6y7y8°y8y9°y9°<br>y10°y10y11y12°y12*y12°<br>y13*y13 | 1639.94 | 54.968  | 1625298 | 2 | 820.47 | 1.56   |
| P02768 ALBU_HUMAN Serum albumin | 26 | Carbamidomethyl+C(5);<br>Carbamidomethyl+C(6);<br>Carbamidomethyl+C(13) | VHTECCHGDLLCADDRADLAK         | 264 | 22 | 5  | 37.46  | y5y9y12y19y20                                                                                                | 2585.10 | 46.915  | 87763   | 4 | 647.03 | -8.78  |
| P02768 ALBU_HUMAN Serum albumin | 27 | Carbamidomethyl+C(4);<br>Carbamidomethyl+C(17)                          | RMPCAEDYLSVVLNQLCVLHEK        | 468 | 22 | 13 | 76.52  | b4b5b6b11b14°b14°*b14°<br>b19b21y4y6y9°y9                                                                    | 2674.31 | 103.236 | 53056   | 3 | 892.11 | -1.64  |
| P02768 ALBU_HUMAN Serum albumin | 28 | Carbamidomethyl+C(6);<br>Carbamidomethyl+C(7);<br>Carbamidomethyl+C(15) | AAFTECCQAADKAACLLPK           | 186 | 19 | 4  | 22.91  | b3b5b11y14                                                                                                   | 2124.96 | 107.843 | 5755    | 3 | 708.99 | -14.48 |
| P02768 ALBU_HUMAN Serum albumin | 29 |                                                                         | FKDLGEENFK                    | 34  | 10 | 5  | 26.21  | b4b8°b8y8°y8                                                                                                 | 1226.60 | 30.957  | 5003    | 2 | 613.80 | -4.48  |
| P02768 ALBU_HUMAN Serum albumin | 30 | Carbamidomethyl+C(3)                                                    | NECFLQHKKDDNPNLPR             | 122 | 16 | 3  | 16.61  | b3y7y14                                                                                                      | 1996.91 | 99.521  | 3233    | 3 | 666.31 | -11.55 |
| P02768 ALBU_HUMAN Serum albumin | 31 |                                                                         | DAHKSEVAHR                    | 24  | 10 | 6  | 46.93  | b3°b3b5b9°b9y6                                                                                               | 1149.58 | 37.548  | 3137    | 2 | 575.29 | 3.29   |
| P02768 ALBU_HUMAN Serum albumin | 32 |                                                                         | NYAEAKDVFLGMFLYEYAR           | 341 | 19 | 5  | 14.47  | b8°b8b10°b10y12                                                                                              | 2300.08 | 83.525  | 2865    | 3 | 767.37 | -9.98  |
| P02768 ALBU_HUMAN Serum albumin | 33 | Carbamidomethyl+C(10);<br>Oxidation+M(9)                                | LVRPEVDVMCTAFHDNEETFLKK       | 138 | 23 | 3  | 21.72  | b12y10y11                                                                                                    | 2794.33 | 118.203 | 5314    | 3 | 932.11 | -8.65  |
| P02768 ALBU_HUMAN Serum albumin | 34 | Carbamidomethyl+C(10);<br>Oxidation+M(9)                                | LVRPEVDVMCTAFHDNEETFLK        | 138 | 22 | 4  | 13.05  | b19y6°y6y12                                                                                                  | 2666.28 | 96.847  | 4720    | 3 | 889.43 | 9.07   |

|                                           |    |                                             |                                         |     |    |    |        |                                         |         |         |        |   |         |        |
|-------------------------------------------|----|---------------------------------------------|-----------------------------------------|-----|----|----|--------|-----------------------------------------|---------|---------|--------|---|---------|--------|
| P02768 ALBU_HUMAN Serum albumin           | 35 | Oxidation+M(6)                              | DVFLGMFLYEYAR                           | 347 | 13 | 3  | 20.02  | b4b8y7                                  | 1639.80 | 84.809  | 4118   | 2 | 820.40  | 7.97   |
| P02768 ALBU_HUMAN Serum albumin           | 36 | Oxidation+M(6)                              | DVFLGMFLYEYARR                          | 347 | 14 | 3  | 18.69  | b7y8y13                                 | 1795.86 | 75.459  | 3561   | 4 | 449.72  | -14.48 |
| P02768 ALBU_HUMAN Serum albumin           | 37 | Carbamidomethyl+C(3)                        | QQCPFEDHVK                              | 55  | 10 | 1  | 7.79   | b3                                      | 1287.60 | 107.876 | 1633   | 2 | 644.30  | 14.51  |
| P02768 ALBU_HUMAN Serum albumin           | 38 |                                             | AEFAEVSK                                | 249 | 8  | 0  | 1.29   |                                         | 862.43  | 32.457  | 16301  | 1 | 862.43  | 6.65   |
| P07437 TBB5_HUMAN Tubulin beta chain      | 1  |                                             | LAVNMVFPFR                              | 252 | 10 | 10 | 85.76  | b2b5*b5y4y5y6y7y8y9y10                  | 1143.63 | 72.182  | 134998 | 2 | 572.32  | -5.34  |
| P07437 TBB5_HUMAN Tubulin beta chain      | 2  |                                             | SGPFGQIFRPDNFVFGQSGAGNNWAK              | 77  | 26 | 10 | 30.87  | b2b13b14*b14y1y2y6y12y18y26             | 2798.35 | 89.252  | 124179 | 3 | 933.46  | 3.75   |
| P07437 TBB5_HUMAN Tubulin beta chain      | 3  |                                             | IMNTFSVVPSPK                            | 162 | 12 | 4  | 25.61  | b4y1y7y8                                | 1319.71 | 63.200  | 97959  | 2 | 660.36  | 6.94   |
| P07437 TBB5_HUMAN Tubulin beta chain      | 4  |                                             | ALTVPELTQQVFDK                          | 282 | 15 | 6  | 35.86  | y4*y4y7y8y11y15                         | 1659.90 | 83.696  | 88039  | 2 | 830.45  | 0.29   |
| P07437 TBB5_HUMAN Tubulin beta chain      | 5  | Carbamidomethyl+C(23)                       | LTPTYGDLNHLVSVATMSGVTTCLR               | 216 | 25 | 14 | 116.96 | y2y3y4y5y6y7*y7y8y10y12y13y14y22y25     | 2708.33 | 95.085  | 80004  | 3 | 903.45  | -1.35  |
| P07437 TBB5_HUMAN Tubulin beta chain      | 6  |                                             | ISVYYNEATGGK                            | 46  | 12 | 10 | 82.15  | b5y3y4y7y8*y8y9*y9y10y12                | 1301.64 | 44.469  | 58078  | 2 | 651.32  | -1.50  |
| P07437 TBB5_HUMAN Tubulin beta chain      | 7  | Carbamidomethyl+C(27);Carbamidomethyl+C(37) | VSDTVVEPYNATLSVHQLVENTDETICIDNEALYDICFR | 174 | 39 | 10 | 23.76  | b6b8b12*b12*b12b13y17y9*y9              | 4593.04 | 89.055  | 41967  | 6 | 766.35  | -14.56 |
| P07437 TBB5_HUMAN Tubulin beta chain      | 8  | Carbamidomethyl+C(5);Carbamidomethyl+C(7)   | EAESCDCLQGFQLTHSLGGGTGSGMGTLISK         | 122 | 32 | 4  | 16.83  | y3y7y15y32                              | 3311.56 | 81.243  | 41273  | 3 | 1104.52 | 6.64   |
| P07437 TBB5_HUMAN Tubulin beta chain      | 9  |                                             | IREEYPDR                                | 154 | 8  | 8  | 48.29  | b2b3b4b7*b7y1y4y8                       | 1077.53 | 24.134  | 32991  | 2 | 539.27  | 1.02   |
| P07437 TBB5_HUMAN Tubulin beta chain      | 10 | Carbamidomethyl+C(10)                       | EIVHIQAGQCQNIGAK                        | 2   | 17 | 9  | 42.48  | b4*b4b5*b5b12y2y3y8y12                  | 1822.94 | 43.159  | 10570  | 2 | 911.97  | 9.38   |
| P07437 TBB5_HUMAN Tubulin beta chain      | 11 |                                             | ISEQFTAMFRR                             | 380 | 11 | 6  | 23.63  | b1b5b10*b10y8y11                        | 1385.70 | 71.875  | 2533   | 3 | 462.57  | -0.79  |
| P07437 TBB5_HUMAN Tubulin beta chain      | 12 | Phosphoryl STY(8)                           | ALTVPELTQQVFDK                          | 282 | 15 | 8  | 28.59  | b10y4*y4y7*y7*y7y9*y9                   | 1739.83 | 89.979  | 14070  | 2 | 870.42  | -11.44 |
| P07437 TBB5_HUMAN Tubulin beta chain      | 13 | Carbamidomethyl+C(12);Oxidation+M(1)        | MREIVHIQAGQCQNIGAK                      | 0   | 19 | 4  | 25.13  | b5y9y10y13                              | 2126.08 | 65.481  | 18946  | 3 | 709.36  | 7.81   |
| Q71U36 TBA1A_HUMAN Tubulin alpha-1A chain | 1  |                                             | VGINYQPPTVPPGGDLAK                      | 352 | 18 | 14 | 58.01  | b3b5*b5b6*b6b11*b11y1y2y3y7y8y12y18     | 1824.98 | 65.287  | 217298 | 2 | 913.00  | -0.33  |
| Q71U36 TBA1A_HUMAN Tubulin alpha-1A chain | 2  |                                             | AVFVDLEPTVIDEVR                         | 64  | 15 | 13 | 124.42 | b3b6b7y2y3y4y6y7y8y10y11y12y15          | 1701.91 | 83.845  | 209045 | 2 | 851.46  | 0.14   |
| Q71U36 TBA1A_HUMAN Tubulin alpha-1A chain | 3  |                                             | QLFHPEQLITGKEDAANNYAR                   | 84  | 21 | 16 | 83.17  | b2b4*b4b5b6*b6b10y3y5*y5y6y7*y7y9y12y21 | 2415.20 | 61.492  | 170806 | 3 | 805.74  | -0.51  |
| Q71U36 TBA1A_HUMAN Tubulin alpha-1A chain | 4  |                                             | NLDIERPTYTNLNR                          | 215 | 14 | 13 | 71.12  | b2*b2b3*b3y2y3y4*y4y6y7y8y12y14         | 1718.87 | 52.276  | 109813 | 3 | 573.63  | -9.73  |
| Q71U36 TBA1A_HUMAN Tubulin alpha-1A chain | 5  | Carbamidomethyl+C(3)                        | AVCMLSNTTAAIEAWAR                       | 373 | 17 | 7  | 48.39  | b8b9y10y11*y11y13y15                    | 1864.91 | 83.499  | 94580  | 2 | 932.96  | 1.31   |
| Q71U36 TBA1A_HUMAN Tubulin alpha-1A chain | 6  | Carbamidomethyl+C(15)                       | AYHEQLSVAEITNACFEPANQMVK                | 280 | 24 | 9  | 53.84  | b10b14y4y9y11y12y13*y13y17              | 2750.30 | 72.865  | 53972  | 3 | 917.44  | 3.99   |
| Q71U36 TBA1A_HUMAN Tubulin alpha-1A chain | 7  | Carbamidomethyl+C(4);Carbamidomethyl+C(5)   | YMACCLLYR                               | 311 | 9  | 5  | 29.76  | b2b3y5y7y9                              | 1249.56 | 60.691  | 43718  | 2 | 625.28  | 4.01   |
| Q71U36 TBA1A_HUMAN Tubulin alpha-1A chain | 8  |                                             | LSVDYGKK                                | 156 | 8  | 10 | 66     | b2*b2y2y3y4y5y6*y6y7y8                  | 909.50  | 28.699  | 36993  | 2 | 455.25  | -3.22  |
| Q71U36 TBA1A_HUMAN Tubulin alpha-1A chain | 9  |                                             | FDGALNVDLTFQTNLVPYPR                    | 243 | 21 | 12 | 66.62  | b2*b2b3b4b5b12b13y2y4y5y12y21           | 2409.22 | 94.359  | 27498  | 2 | 1205.12 | 6.49   |



|                                                                         |    |                       |                                       |     |    |    |        |                                                                                      |         |         |         |   |         |        |
|-------------------------------------------------------------------------|----|-----------------------|---------------------------------------|-----|----|----|--------|--------------------------------------------------------------------------------------|---------|---------|---------|---|---------|--------|
| Q71U36 TBA1A_HUMAN Tubulin alpha-1A chain                               | 10 |                       | GHYTIGK                               | 105 | 7  | 5  | 39.69  | b4°b4b6y6y7                                                                          | 775.41  | 26.580  | 7470    | 2 | 388.21  | 5.67   |
| Q9H299 SH3L3_HUMAN SH3 domain-binding glutamic acid-rich-like protein 3 | 1  |                       | VYSTSVTGSR                            | 5   | 10 | 9  | 66.86  | b2y4y6y7y8°y8y9°y9y10                                                                | 1056.53 | 27.178  | 109249  | 2 | 528.77  | -1.73  |
| Q9H299 SH3L3_HUMAN SH3 domain-binding glutamic acid-rich-like protein 3 | 2  | Carbamidomethyl+C(13) | ATPPQIVNGDQYCGDYELFVEAV<br>EQNTLQEFLK | 58  | 33 | 20 | 89.95  | b2b6b7°b7b11°b11b23y<br>2y3y4y5°y5y6y9*y9y10<br>*y10y11y13y33                        | 3815.82 | 117.274 | 15818   | 3 | 1272.61 | 1.98   |
| Q9H299 SH3L3_HUMAN SH3 domain-binding glutamic acid-rich-like protein 3 | 3  |                       | IQYQLVDISQDNALR                       | 32  | 15 | 5  | 35.97  | b3b5y7y10y13                                                                         | 1775.90 | 69.836  | 52713   | 2 | 888.45  | -17.18 |
| Q9H299 SH3L3_HUMAN SH3 domain-binding glutamic acid-rich-like protein 3 | 4  |                       | VYSTSVTGSREIK                         | 5   | 13 | 5  | 31.41  | b5b6°b6b10y6                                                                         | 1426.76 | 54.843  | 73264   | 2 | 713.88  | 2.82   |
| Q9H299 SH3L3_HUMAN SH3 domain-binding glutamic acid-rich-like protein 3 | 5  |                       | IQYQLVDISQDNALRDEM                    | 32  | 19 | 3  | 23.65  | y3y13y14                                                                             | 2307.16 | 70.533  | 8988    | 2 | 1154.08 | 7.51   |
| O00299 CLIC1_HUMAN Chloride intracellular channel protein 1             | 1  |                       | LAALNPESNTAGLDIFAK                    | 95  | 18 | 17 | 112.18 | b2b3b4b5b10y1y2y3y4y<br>5y11*y11y12y13y14*y1<br>4y18                                 | 1844.98 | 79.929  | 60694   | 2 | 923.00  | 4.10   |
| O00299 CLIC1_HUMAN Chloride intracellular channel protein 1             | 2  | Carbamidomethyl+C(7)  | EEFASTCPDDEEIELAYEQVAK                | 216 | 22 | 6  | 28.7   | y5°y5y9y14y15y22                                                                     | 2573.14 | 77.249  | 34296   | 2 | 1287.08 | 7.97   |
| O00299 CLIC1_HUMAN Chloride intracellular channel protein 1             | 3  | Carbamidomethyl+C(2)  | LCPGGQLPFLLYGTEVHTDTNK                | 57  | 22 | 4  | 19.56  | y6y11y20y22                                                                          | 2460.21 | 82.804  | 30448   | 3 | 820.74  | -5.66  |
| O00299 CLIC1_HUMAN Chloride intracellular channel protein 1             | 4  |                       | VLDNYLTSPLPEEVDETSAEDEGV<br>SQRK      | 138 | 28 | 5  | 16.81  | b6y9y13y15y28                                                                        | 3120.49 | 69.617  | 26575   | 3 | 1040.83 | 1.25   |
| O00299 CLIC1_HUMAN Chloride intracellular channel protein 1             | 5  |                       | NSNPALNDNLEK                          | 119 | 12 | 19 | 62.09  | b2°b2°b2b5°b5°b5b6°b<br>6b8b10°b10°b10y1y2°y<br>2y8y9*y9y12                          | 1328.65 | 36.899  | 26077   | 2 | 664.83  | 1.29   |
| O00299 CLIC1_HUMAN Chloride intracellular channel protein 1             | 6  | Carbamidomethyl+C(4)  | IGNCPFSQR                             | 20  | 9  | 3  | 29.76  | b3y5y8                                                                               | 1078.51 | 37.146  | 26025   | 2 | 539.76  | 1.25   |
| O00299 CLIC1_HUMAN Chloride intracellular channel protein 1             | 7  |                       | VLDNYLTSPLPEEVDETSAEDEGV<br>SQR       | 138 | 27 | 8  | 22.01  | b8°b8y6°y6y8y9*y9y27                                                                 | 2992.43 | 73.912  | 12751   | 2 | 1496.72 | 14.52  |
| O00299 CLIC1_HUMAN Chloride intracellular channel protein 1             | 8  | Carbamidomethyl+C(12) | FLDGNELTLADCNLLPK                     | 166 | 17 | 3  | 15.8   | b4b10y10                                                                             | 1932.98 | 84.337  | 31710   | 2 | 966.99  | 2.02   |
| O00299 CLIC1_HUMAN Chloride intracellular channel protein 1             | 9  |                       | FSAYIK                                | 113 | 6  | 4  | 39.26  | b3b4°b4b5                                                                            | 728.39  | 42.305  | 9446    | 2 | 364.70  | -8.88  |
| O00299 CLIC1_HUMAN Chloride intracellular channel protein 1             | 10 |                       | MAEEQPQVELFVKAGSDGAK                  | 0   | 20 | 4  | 22.06  | b11b12y5°y5                                                                          | 2134.04 | 58.291  | 75623   | 2 | 1067.52 | -4.23  |
| O00299 CLIC1_HUMAN Chloride intracellular channel protein 1             | 11 |                       | AEEQPQVELFVKAGSDGAK                   | 1   | 19 | 3  | 14.47  | b15y5y18                                                                             | 2002.99 | 72.021  | 6198    | 3 | 668.33  | -9.69  |
| O00299 CLIC1_HUMAN Chloride intracellular channel protein 1             | 12 |                       | GVHRYLSNAYAR                          | 204 | 12 | 5  | 43.99  | y6°y6y8y9y10                                                                         | 1406.73 | 42.249  | 1751    | 3 | 469.58  | -0.17  |
| O00299 CLIC1_HUMAN Chloride intracellular channel protein 1             | 13 | Phosphoryl STY(18)    | VLDNYLTSPLPEEVDETSAEDEGV<br>SQRK      | 138 | 28 | 4  | 14.39  | b3b17y9y20                                                                           | 3200.45 | 79.554  | 3565    | 5 | 640.90  | 2.75   |
| Q6S8J3 A26CA_HUMAN ANKRD26-like family C member 1A                      | 1  |                       | SYELPDGQVITIGNER                      | 938 | 16 | 27 | 206.97 | b2b3°b3b6b8b9°b9b10b<br>12°b12y3*y3y4*y4y5y6<br>*y6y7y8y9y10y11°y11y<br>12°y12y13y16 | 1790.90 | 70.748  | 2649301 | 2 | 895.95  | 2.39   |
| Q6S8J3 A26CA_HUMAN ANKRD26-like family C member 1A                      | 2  |                       | AGFAGDDAPR                            | 718 | 10 | 20 | 141.51 | b1b2b3b4b5b8y1y2y3y4<br>°y4y5°y5y6°y6y7°y7y8y<br>9y10                                | 976.44  | 30.235  | 1748916 | 2 | 488.73  | -3.50  |
| Q6S8J3 A26CA_HUMAN ANKRD26-like family C member 1A                      | 3  |                       | AVFPSIVGRPR                           | 728 | 11 | 13 | 106.12 | b1b2y1y2y3y4y5y6y7y8<br>°y8y9y10                                                     | 1198.71 | 55.587  | 1143213 | 2 | 599.86  | 3.56   |

|                                                     |    |                                                                                                 |                               |      |    |    |        |                                                                                     |         |         |        |   |         |        |
|-----------------------------------------------------|----|-------------------------------------------------------------------------------------------------|-------------------------------|------|----|----|--------|-------------------------------------------------------------------------------------|---------|---------|--------|---|---------|--------|
| [Q6S8J3 A26CA_HUMAN ANKRD26-like family C member 1A | 4  | Carbamidomethyl+C(2)                                                                            | LCYVALDFEQEMATAASSSSLEK       | 915  | 23 | 30 | 186.67 | b2b3b4b6b7°b7b8b11b16°b16b23°b23y1y3y4y5y6y7y9y10°y10y11°y11y12y14y16y17°y17*y17y23 | 2550.19 | 91.992  | 423340 | 2 | 1275.60 | 5.94   |
| [Q6S8J3 A26CA_HUMAN ANKRD26-like family C member 1A | 5  |                                                                                                 | QEYDESGPSIVHRK                | 1059 | 14 | 19 | 150.15 | b3°b3b4°b4b14y2y3y4y5y6y7y8y9y10°y10y11y12y14*y14                                   | 1644.79 | 31.141  | 419977 | 3 | 548.93  | -5.94  |
| [Q6S8J3 A26CA_HUMAN ANKRD26-like family C member 1A | 6  |                                                                                                 | QEYDESGPSIVHR                 | 1059 | 13 | 6  | 57.36  | y1y3y4y5y6y11                                                                       | 1516.69 | 37.100  | 276634 | 3 | 506.24  | -5.63  |
| [Q6S8J3 A26CA_HUMAN ANKRD26-like family C member 1A | 7  |                                                                                                 | VVEVDSMPAASSVK                | 1    | 14 | 5  | 24.13  | b9y12°y12y13y14                                                                     | 1418.73 | 49.725  | 118609 | 2 | 709.87  | 6.11   |
| [Q6S8J3 A26CA_HUMAN ANKRD26-like family C member 1A | 8  |                                                                                                 | SQEPEINKDGDRELENFMAIEEMK      | 519  | 24 | 6  | 18.68  | y2y3°y3y5y11y24                                                                     | 2852.34 | 94.021  | 35960  | 3 | 951.45  | 11.81  |
| [Q6S8J3 A26CA_HUMAN ANKRD26-like family C member 1A | 9  |                                                                                                 | HGSTHVGFPENLTNGATAGNGDDGLIPPR | 544  | 29 | 3  | 21.73  | b7b8y13                                                                             | 2901.38 | 67.790  | 32348  | 4 | 726.10  | -2.44  |
| [Q6S8J3 A26CA_HUMAN ANKRD26-like family C member 1A | 10 | Carbamidomethyl+C(9)                                                                            | MNSELSLCK                     | 629  | 10 | 3  | 40.98  | y5y7y9                                                                              | 1168.55 | 58.357  | 5907   | 2 | 584.78  | 9.72   |
| [Q6S8J3 A26CA_HUMAN ANKRD26-like family C member 1A | 11 |                                                                                                 | ELENFMAIEEMKK                 | 531  | 13 | 4  | 20.02  | b3°b3y5y10                                                                          | 1611.78 | 86.458  | 5380   | 2 | 806.39  | 3.48   |
| [Q6S8J3 A26CA_HUMAN ANKRD26-like family C member 1A | 12 | Carbamidomethyl+C(25)                                                                           | ALQLNELTMDDDTAVLVIDNGSGMCK    | 692  | 26 | 3  | 11.85  | b10b12y5                                                                            | 2823.30 | 72.470  | 4746   | 2 | 1412.16 | -6.31  |
| [Q6S8J3 A26CA_HUMAN ANKRD26-like family C member 1A | 13 |                                                                                                 | MSQELEINKDGDR                 | 400  | 13 | 5  | 20.02  | b3y5y12*y12y13                                                                      | 1534.74 | 58.303  | 3187   | 2 | 767.87  | 13.36  |
| [Q6S8J3 A26CA_HUMAN ANKRD26-like family C member 1A | 14 | Carbamidomethyl+C(2)                                                                            | ICELSDYKEK                    | 470  | 11 | 3  | 35.39  | b4b5b6                                                                              | 1397.68 | 60.598  | 1678   | 2 | 699.35  | -9.78  |
| [Q6S8J3 A26CA_HUMAN ANKRD26-like family C member 1A | 15 |                                                                                                 | DVLHENSTLR                    | 642  | 10 | 5  | 26.21  | b4°b4b9y7*y7                                                                        | 1183.59 | 50.099  | 18399  | 1 | 1183.59 | -17.84 |
| [Q6S8J3 A26CA_HUMAN ANKRD26-like family C member 1A | 16 | Carbamidomethyl+C(2);<br>Carbamidomethyl+C(5);<br>Carbamidomethyl+C(8);<br>Carbamidomethyl+C(9) | WCHHCFCCR                     | 63   | 10 | 6  | 70.77  | b3b4y5y7y8y9                                                                        | 1519.53 | 16.832  | 4744   | 2 | 760.27  | -21.69 |
| [Q6S8J3 A26CA_HUMAN ANKRD26-like family C member 1A | 17 |                                                                                                 | ISSENSNPEQELK                 | 367  | 13 | 8  | 61.27  | b4b6b7b8°b8b11y10°y10                                                               | 1474.68 | 108.686 | 3109   | 2 | 737.84  | -13.82 |
| [Q6S8J3 A26CA_HUMAN ANKRD26-like family C member 1A | 18 |                                                                                                 | GYRFTTMAER                    | 896  | 10 | 3  | 33.2   | b5b6b8                                                                              | 1231.60 | 25.794  | 5419   | 2 | 616.30  | 6.24   |
| [Q6S8J3 A26CA_HUMAN ANKRD26-like family C member 1A | 19 | Oxidation+M(19)                                                                                 | MSQELEINKDGDREVEEEMK          | 400  | 20 | 3  | 22.06  | b10b11y8                                                                            | 2425.08 | 75.521  | 8711   | 4 | 607.03  | -2.01  |
| [Q6S8J3 A26CA_HUMAN ANKRD26-like family C member 1A | 20 |                                                                                                 | VVEVDSMPAAS                   | 1    | 11 | 0  | 3.87   |                                                                                     | 1104.54 | 49.755  | 4322   | 3 | 368.85  | 12.38  |

|                                                    |    |                                             |                                          |      |    |    |        |                                         |         |         |        |   |         |        |
|----------------------------------------------------|----|---------------------------------------------|------------------------------------------|------|----|----|--------|-----------------------------------------|---------|---------|--------|---|---------|--------|
| Q6S8J3 A26CA_HUMAN ANKRD26-like family C member 1A | 21 |                                             | QEYDESGPSIVHR                            | 1059 | 13 | 0  | 3.44   |                                         | 1499.68 | 37.091  | 20054  | 3 | 500.56  | 3.42   |
| Q6S8J3 A26CA_HUMAN ANKRD26-like family C member 1A | 22 |                                             | QEYDESGPSIVHRK                           | 1059 | 14 | 0  | 3.87   |                                         | 1627.78 | 31.125  | 2827   | 2 | 814.39  | 8.70   |
| Q9BVA1 TBB2B_HUMAN Tubulin beta-2B chain           | 1  |                                             | LAVNMVPPFR                               | 252  | 10 | 10 | 85.76  | b2b5*b5y4y5y6y7y8y9y10                  | 1143.63 | 72.182  | 134998 | 2 | 572.32  | -5.34  |
| Q9BVA1 TBB2B_HUMAN Tubulin beta-2B chain           | 2  |                                             | SGPFGQIFRPDNFVFGQSGAGNNWAK               | 77   | 26 | 10 | 30.87  | b2b13b14*b14y1y2y6y12y18y26             | 2798.35 | 89.252  | 124179 | 3 | 933.46  | 3.75   |
| Q9BVA1 TBB2B_HUMAN Tubulin beta-2B chain           | 3  | Carbamidomethyl+C(23)                       | LTTPTYGDLNHLVSATMSGVTTC LR               | 216  | 25 | 14 | 116.96 | y2y3y4y5y6y7*y7y8y10y12y13y14y22y25     | 2708.33 | 95.085  | 80004  | 3 | 903.45  | -1.35  |
| Q9BVA1 TBB2B_HUMAN Tubulin beta-2B chain           | 4  | Carbamidomethyl+C(27);Carbamidomethyl+C(37) | VSDTVVEPYNATLSVHQLVENTD ETYCIDNEALYDICFR | 174  | 39 | 10 | 23.76  | b6b8b12*b12*b12b13y1y7y9*y9             | 4593.04 | 89.055  | 41967  | 6 | 766.35  | -14.56 |
| Q9BVA1 TBB2B_HUMAN Tubulin beta-2B chain           | 5  |                                             | IREEYPDR                                 | 154  | 8  | 8  | 48.29  | b2b3b4b7*b7y1y4y8                       | 1077.53 | 24.134  | 32991  | 2 | 539.27  | 1.02   |
| Q9BVA1 TBB2B_HUMAN Tubulin beta-2B chain           | 6  | Carbamidomethyl+C(10)                       | EIVHIQAGQCNGQIGAK                        | 2    | 17 | 9  | 42.48  | b4*b4b5*b5b12y2y3y8y12                  | 1822.94 | 43.159  | 10570  | 2 | 911.97  | 9.38   |
| Q9BVA1 TBB2B_HUMAN Tubulin beta-2B chain           | 7  |                                             | INVYYNEATGNK                             | 46   | 12 | 3  | 21.63  | b6b9y4                                  | 1385.68 | 64.024  | 3013   | 3 | 462.57  | 10.04  |
| Q9BVA1 TBB2B_HUMAN Tubulin beta-2B chain           | 8  |                                             | ISEQFTAMFRR                              | 380  | 11 | 6  | 23.63  | b1b5b10*b10y8y11                        | 1385.70 | 71.875  | 2533   | 3 | 462.57  | -0.79  |
| Q9BVA1 TBB2B_HUMAN Tubulin beta-2B chain           | 9  |                                             | ALTVPELTQQMFDSK                          | 282  | 15 | 5  | 17.57  | b1b9b12y12*y12                          | 1707.85 | 67.598  | 2263   | 3 | 569.95  | -8.79  |
| Q9BVA1 TBB2B_HUMAN Tubulin beta-2B chain           | 10 |                                             | ISEQFTAMFRR                              | 380  | 11 | 0  | 2.58   |                                         | 1367.69 | 71.882  | 4810   | 3 | 456.57  | 7.68   |
| Q9BQE3 TBA1C_HUMAN Tubulin alpha-1C chain          | 1  |                                             | VGINYQPPTVPPGGDLAK                       | 352  | 18 | 14 | 58.01  | b3b5*b5b6*b6b11*b11y1y2y3y7y8y12y18     | 1824.98 | 65.287  | 217298 | 2 | 913.00  | -0.33  |
| Q9BQE3 TBA1C_HUMAN Tubulin alpha-1C chain          | 2  |                                             | AVFVDLEPTVIDEVR                          | 64   | 15 | 13 | 124.42 | b3b6b7y2y3y4y6y7y8y10y11y12y15          | 1701.91 | 83.845  | 209045 | 2 | 851.46  | 0.14   |
| Q9BQE3 TBA1C_HUMAN Tubulin alpha-1C chain          | 3  |                                             | QLFHPQLITGKEDAANNYAR                     | 84   | 21 | 16 | 83.17  | b2b4*b4b5b6*b6b10y3y5*y5y6y7*y7y9y12y21 | 2415.20 | 61.492  | 170806 | 3 | 805.74  | -0.51  |
| Q9BQE3 TBA1C_HUMAN Tubulin alpha-1C chain          | 4  |                                             | NLDIERPTYTNLNR                           | 215  | 14 | 13 | 71.12  | b2*b2b3*b3y2y3y4*y4y6y7y8y12y14         | 1718.87 | 52.276  | 109813 | 3 | 573.63  | -9.73  |
| Q9BQE3 TBA1C_HUMAN Tubulin alpha-1C chain          | 5  |                                             | LISQIVSSITASLR                           | 229  | 14 | 5  | 18.69  | b4y2y5y8y14                             | 1487.88 | 100.286 | 51813  | 2 | 744.44  | -2.13  |
| Q9BQE3 TBA1C_HUMAN Tubulin alpha-1C chain          | 6  | Carbamidomethyl+C(4);Carbamidomethyl+C(5)   | YMACCLLYR                                | 311  | 9  | 5  | 29.76  | b2b3y5y7y9                              | 1249.56 | 60.691  | 43718  | 2 | 625.28  | 4.01   |
| Q9BQE3 TBA1C_HUMAN Tubulin alpha-1C chain          | 7  |                                             | LSVDYGKK                                 | 156  | 8  | 10 | 66     | b2*b2y2y3y4y5y6*y6y7y8                  | 909.50  | 28.699  | 36993  | 2 | 455.25  | -3.22  |
| Q9BQE3 TBA1C_HUMAN Tubulin alpha-1C chain          | 8  |                                             | FDGALNVDLTFQTNLVPYPR                     | 243  | 21 | 12 | 66.62  | b2*b2b3b4b5b12b13y2y4y5y12y21           | 2409.22 | 94.359  | 27498  | 2 | 1205.12 | 6.49   |
| Q9BQE3 TBA1C_HUMAN Tubulin alpha-1C chain          | 9  | Carbamidomethyl+C(15)                       | AYHEQLTVAEITNACFEPANQMV K                | 280  | 24 | 4  | 12.37  | b7y8*y8y10                              | 2764.31 | 73.419  | 8047   | 3 | 922.11  | 2.12   |
| Q9BQE3 TBA1C_HUMAN Tubulin alpha-1C chain          | 10 |                                             | GHYTIGK                                  | 105  | 7  | 5  | 39.69  | b4*b4b6y6y7                             | 775.41  | 26.580  | 7470   | 2 | 388.21  | 5.67   |
| Q9BQE3 TBA1C_HUMAN Tubulin alpha-1C chain          | 11 | Carbamidomethyl+C(8)                        | TIQFVDWCPTGFK                            | 339  | 13 | 9  | 64.5   | b3b4*b4b7y7*y7y9y10y12                  | 1598.77 | 82.687  | 37591  | 2 | 799.89  | 4.58   |
| Q9BQE3 TBA1C_HUMAN Tubulin alpha-1C chain          | 12 |                                             | AFVHWYVVEGMEEGEFSEAR                     | 402  | 20 | 3  | 13.93  | b3b9y8                                  | 2330.04 | 79.309  | 21452  | 3 | 777.35  | 11.00  |
| Q9BQE3 TBA1C_HUMAN Tubulin alpha-1C chain          | 13 |                                             | TIGGGDDSFNTFFSETGAGK                     | 40   | 20 | 3  | 13.93  | b5b15y4                                 | 2007.86 | 54.847  | 1629   | 2 | 1004.44 | -14.83 |
| Q9BQE3 TBA1C_HUMAN Tubulin alpha-1C chain          | 14 |                                             | AVFVDLEPTVIDEVRTGTYR                     | 64   | 20 | 5  | 19.04  | b7b14y4y6*y6                            | 2280.16 | 114.240 | 3862   | 2 | 1140.58 | -12.10 |

|                                             |    |                                      |                                 |     |    |    |        |                                         |         |         |        |   |         |        |
|---------------------------------------------|----|--------------------------------------|---------------------------------|-----|----|----|--------|-----------------------------------------|---------|---------|--------|---|---------|--------|
| Q9BQE3 TBA1C_HUMAN Tubulin alpha-1C chain   | 15 |                                      | QLFHPEQLITGKEDAANNYAR           | 84  | 21 | 3  | 13.46  | b6y6y11                                 | 2415.19 | 107.055 | 3390   | 2 | 1208.10 | -8.29  |
| Q9BQE3 TBA1C_HUMAN Tubulin alpha-1C chain   | 16 | Carbamidomethyl+C(3)                 | AVCMLSNTTAVAEAWARLDHK           | 373 | 21 | 8  | 49.94  | b5b10°b10b11b12y4y6y10                  | 2344.14 | 109.443 | 1648   | 3 | 782.05  | -5.31  |
| Q9BQE3 TBA1C_HUMAN Tubulin alpha-1C chain   | 17 | Carbamidomethyl+C(3); Oxidation+M(4) | AVCMLSNTTAVAEAWAR               | 373 | 17 | 4  | 15.8   | b11b13°b13y6                            | 1866.89 | 58.355  | 29891  | 2 | 933.95  | 4.38   |
| Q9BQE3 TBA1C_HUMAN Tubulin alpha-1C chain   | 18 |                                      | SVDYGGK                         | 157 | 7  | 1  | 9.46   | b3                                      | 796.41  | 28.693  | 14974  | 2 | 398.71  | -8.81  |
| Q13748 TBA3C_HUMAN Tubulin alpha-3C/D chain | 1  |                                      | VGINYQPPTVVPGGDLAK              | 352 | 18 | 14 | 58.01  | b3b5°b5b6°b6b11°b11y1y2y3y7y8y12y18     | 1824.98 | 65.287  | 217298 | 2 | 913.00  | -0.33  |
| Q13748 TBA3C_HUMAN Tubulin alpha-3C/D chain | 2  |                                      | QLFHPEQLITGKEDAANNYAR           | 84  | 21 | 16 | 83.17  | b2b4°b4b5b6°b6b10y3y5*y5y6y7*y7y9y12y21 | 2415.20 | 61.492  | 170806 | 3 | 805.74  | -0.51  |
| Q13748 TBA3C_HUMAN Tubulin alpha-3C/D chain | 3  |                                      | NLDIERPTYTNLNR                  | 215 | 14 | 13 | 71.12  | b2°b2b3°b3y2y3y4*y4y6y7y8y12y14         | 1718.87 | 52.276  | 109813 | 3 | 573.63  | -9.73  |
| Q13748 TBA3C_HUMAN Tubulin alpha-3C/D chain | 4  | Carbamidomethyl+C(3)                 | AVCMLSNTTAAIEAWAR               | 373 | 17 | 7  | 48.39  | b8b9y10y11°y11y13y15                    | 1864.91 | 83.499  | 94580  | 2 | 932.96  | 1.31   |
| Q13748 TBA3C_HUMAN Tubulin alpha-3C/D chain | 5  | Carbamidomethyl+C(15)                | AYHEQLSVAEITNACFEPANQMV K       | 280 | 24 | 9  | 53.84  | b10b14y4y9y11y12y13°y13y17              | 2750.30 | 72.865  | 53972  | 3 | 917.44  | 3.99   |
| Q13748 TBA3C_HUMAN Tubulin alpha-3C/D chain | 6  |                                      | LSVDYGGK                        | 156 | 8  | 10 | 66     | b2°b2y2y3y4y5y6°y6y7y8                  | 909.50  | 28.699  | 36993  | 2 | 455.25  | -3.22  |
| Q13748 TBA3C_HUMAN Tubulin alpha-3C/D chain | 7  |                                      | FDGALNVDLTEFQTNLVPYPR           | 243 | 21 | 12 | 66.62  | b2°b2b3b4b5b12b13y2y4y5y12y21           | 2409.22 | 94.359  | 27498  | 2 | 1205.12 | 6.49   |
| Q13748 TBA3C_HUMAN Tubulin alpha-3C/D chain | 8  |                                      | GHYTIGK                         | 105 | 7  | 5  | 39.69  | b4°b4b6y6y7                             | 775.41  | 26.580  | 7470   | 2 | 388.21  | 5.67   |
| Q13748 TBA3C_HUMAN Tubulin alpha-3C/D chain | 9  | Carbamidomethyl+C(5)                 | LADLCTGLQGFLIFHSFGGGTGSFASLLMER | 124 | 32 | 4  | 11.01  | b5b11y13°y13                            | 3359.64 | 120.185 | 38361  | 4 | 840.66  | -5.16  |
| Q13748 TBA3C_HUMAN Tubulin alpha-3C/D chain | 10 | Phosphoryl STY()                     | FDGALNVDLTEFQTNLVPYPR           | 243 | 21 | 7  | 39.73  | b5°b5b6b8b9°b9°b9                       | 2489.19 | 74.624  | 14949  | 3 | 830.40  | 9.91   |
| Q15404 RSU1_HUMAN Ras suppressor protein 1  | 1  |                                      | AENNPWVTPIADQFQLGVSHVFEYIR      | 212 | 26 | 15 | 109.95 | b2b3b4b7y5y6y7y8y10y12y18y19y20y22y26   | 3030.51 | 113.007 | 37291  | 3 | 1010.84 | 0.89   |
| Q15404 RSU1_HUMAN Ras suppressor protein 1  | 2  |                                      | LTVLPPELGNLDTLGQK               | 191 | 17 | 8  | 36.11  | b2°b2b3°b3b4y13°y13y14                  | 1808.02 | 86.050  | 33015  | 2 | 904.52  | 4.59   |
| Q15404 RSU1_HUMAN Ras suppressor protein 1  | 3  |                                      | NLEVLNFFNNQIEELPTQISSLQK        | 63  | 24 | 14 | 62.67  | b2b3b4°b4b5°b5y1y2y3y4*y4y5y9y24        | 2818.45 | 108.544 | 18420  | 3 | 940.16  | -3.46  |
| Q15404 RSU1_HUMAN Ras suppressor protein 1  | 4  |                                      | HLNLGMNR                        | 89  | 8  | 5  | 32.34  | b7y5*y5y6*y6                            | 954.48  | 41.063  | 15305  | 2 | 477.74  | -12.85 |
| Q15404 RSU1_HUMAN Ras suppressor protein 1  | 5  |                                      | YLYGR                           | 243 | 5  | 1  | 12.94  | y3                                      | 671.35  | 34.747  | 11832  | 2 | 336.18  | 5.00   |
| Q15404 RSU1_HUMAN Ras suppressor protein 1  | 6  |                                      | LVEESR                          | 7   | 6  | 1  | 13.37  | y3                                      | 732.39  | 38.926  | 9709   | 1 | 732.39  | 3.75   |
| Q15404 RSU1_HUMAN Ras suppressor protein 1  | 7  |                                      | NQPEVMSDR                       | 15  | 10 | 5  | 53.06  | b5b6y4y7y8                              | 1190.53 | 26.621  | 4929   | 3 | 397.51  | 12.82  |
| Q15404 RSU1_HUMAN Ras suppressor protein 1  | 8  |                                      | ALYLSNDNFEILPPDIGK              | 137 | 18 | 5  | 28.38  | b7b10°b10y13y14                         | 2020.06 | 95.485  | 4166   | 3 | 674.02  | 15.89  |
| Q15404 RSU1_HUMAN Ras suppressor protein 1  | 9  |                                      | LNTLPR                          | 97  | 6  | 1  | 13.37  | y4                                      | 713.42  | 30.776  | 3707   | 2 | 357.22  | -9.41  |
| Q15404 RSU1_HUMAN Ras suppressor protein 1  | 10 |                                      | YLYGRHMQANPEPPK                 | 243 | 15 | 4  | 28.59  | b3b9b10y10                              | 1800.86 | 70.220  | 8426   | 2 | 900.93  | -14.30 |
| Q13885 TBB2A_HUMAN Tubulin beta-2A chain    | 1  |                                      | LAVNMVPPFR                      | 252 | 10 | 10 | 85.76  | b2b5°b5y4y5y6y7y8y9y10                  | 1143.63 | 72.182  | 134998 | 2 | 572.32  | -5.34  |
| Q13885 TBB2A_HUMAN Tubulin beta-2A chain    | 2  |                                      | SGPFGQIFRPDNFVFGQSAGNNWAK       | 77  | 26 | 10 | 30.87  | b2b13b14°b14y1y2y6y12y18y26             | 2798.35 | 89.252  | 124179 | 3 | 933.46  | 3.75   |
| Q13885 TBB2A_HUMAN Tubulin beta-2A chain    | 3  | Carbamidomethyl+C(23)                | LTTPTYGDLNHLVSATMSGVTTCLR       | 216 | 25 | 14 | 116.96 | y2y3y4y5y6y7°y7y8y10y12y13y14y22y25     | 2708.33 | 95.085  | 80004  | 3 | 903.45  | -1.35  |

|                                             |    |                       |                                  |     |    |    |        |                                                |         |         |         |   |         |        |
|---------------------------------------------|----|-----------------------|----------------------------------|-----|----|----|--------|------------------------------------------------|---------|---------|---------|---|---------|--------|
| Q13885 TBB2A_HUMAN Tubulin beta-2A chain    | 4  |                       | IREEYPDR                         | 154 | 8  | 8  | 48.29  | b2b3b4b7b7y1y4y8                               | 1077.53 | 24.134  | 32991   | 2 | 539.27  | 1.02   |
| Q13885 TBB2A_HUMAN Tubulin beta-2A chain    | 5  | Carbamidomethyl+C(10) | EIVHIQAGQCNGIQGAK                | 2   | 17 | 9  | 42.48  | b4b4b5b5b12y2y3y8y12                           | 1822.94 | 43.159  | 10570   | 2 | 911.97  | 9.38   |
| Q13885 TBB2A_HUMAN Tubulin beta-2A chain    | 6  |                       | ISEQFTAMFRR                      | 380 | 11 | 6  | 23.63  | b1b5b10b10y8y11                                | 1385.70 | 71.875  | 2533    | 3 | 462.57  | -0.79  |
| Q13885 TBB2A_HUMAN Tubulin beta-2A chain    | 7  |                       | ALTVPELTQQMFDSK                  | 282 | 15 | 5  | 17.57  | b1b9b12y12y12                                  | 1707.85 | 67.598  | 2263    | 3 | 569.95  | -8.79  |
| Q13885 TBB2A_HUMAN Tubulin beta-2A chain    | 8  |                       | LHFFMPGFAPLTSR                   | 262 | 14 | 7  | 57.63  | b5b9b13y11y12y12y13                            | 1620.82 | 88.955  | 24694   | 3 | 540.94  | -12.50 |
| Q13885 TBB2A_HUMAN Tubulin beta-2A chain    | 9  |                       | GHYTEGAELVDSVLDVVR               | 103 | 18 | 3  | 15.09  | b14y5y8                                        | 1958.98 | 92.713  | 16856   | 3 | 653.66  | -3.30  |
| Q13885 TBB2A_HUMAN Tubulin beta-2A chain    | 10 |                       | AILVDLEPGTMDSVR                  | 62  | 15 | 4  | 23.59  | b13y5y6y6                                      | 1615.81 | 81.505  | 13978   | 3 | 539.27  | -18.13 |
| Q13885 TBB2A_HUMAN Tubulin beta-2A chain    | 11 |                       | NSSYFVEWIPNNVK                   | 336 | 14 | 6  | 47.28  | b8b9b9b11b12y10                                | 1696.83 | 42.242  | 13562   | 2 | 848.92  | -0.36  |
| Q13885 TBB2A_HUMAN Tubulin beta-2A chain    | 12 |                       | EVDEQMLNVQNK                     | 324 | 12 | 4  | 21.63  | b5y8y10y10                                     | 1446.69 | 92.051  | 7398    | 2 | 723.85  | 3.88   |
| Q13885 TBB2A_HUMAN Tubulin beta-2A chain    | 13 |                       | IMNTFSVMPSPK                     | 162 | 12 | 7  | 60.67  | b5b6b6b8y5y6y7                                 | 1351.70 | 71.878  | 3157    | 3 | 451.24  | 21.13  |
| Q13885 TBB2A_HUMAN Tubulin beta-2A chain    | 14 |                       | ISEQFTAMFR                       | 380 | 10 | 3  | 26.21  | b4b9y7                                         | 1229.61 | 45.107  | 2497    | 2 | 615.31  | 12.11  |
| Q13885 TBB2A_HUMAN Tubulin beta-2A chain    | 15 |                       | INVYYNEAAGNKYVPR                 | 46  | 16 | 3  | 24.32  | b3b10b13                                       | 1870.93 | 59.696  | 8766    | 2 | 935.97  | -8.09  |
| Q13885 TBB2A_HUMAN Tubulin beta-2A chain    | 16 | Phosphoryl STY()      | ALTVPELTQQMFDSK                  | 282 | 15 | 7  | 61.18  | b3b5b6_H3PO4<br>b6b7y3y8y12                    | 1787.84 | 101.261 | 3519    | 2 | 894.43  | 13.38  |
| Q13885 TBB2A_HUMAN Tubulin beta-2A chain    | 17 | Oxidation+M()         | IMNTFSVMPSPK                     | 162 | 12 | 6  | 48.48  | b4b5b6b6b11y8                                  | 1367.68 | 86.426  | 10013   | 2 | 684.35  | 10.89  |
| P02100 HBE_HUMAN Hemoglobin subunit epsilon | 1  |                       | LLVVYPWTQR                       | 31  | 10 | 20 | 126.8  | b2b3b4b5y1y2y3y3y3y4y4y5y5y6y6y7y7y8y9y10      | 1274.72 | 78.095  | 1440083 | 2 | 637.87  | -0.77  |
| P02100 HBE_HUMAN Hemoglobin subunit epsilon | 2  |                       | VHFTAEEK                         | 1   | 8  | 4  | 35.35  | b1b3b7y3                                       | 960.47  | 50.038  | 6928    | 1 | 960.47  | -5.40  |
| P02100 HBE_HUMAN Hemoglobin subunit epsilon | 3  |                       | MVHFTAEEK                        | 0   | 9  | 4  | 29.76  | b5b6y7y7                                       | 1091.52 | 26.687  | 3627    | 3 | 364.51  | -1.01  |
| P06396 GELS_HUMAN Gelsolin                  | 1  |                       | AGALNSNDAFVLK                    | 584 | 13 | 15 | 79.2   | b3b5b5b11b11b12b13y4y9y9y10y11y11y13           | 1319.70 | 60.223  | 209145  | 2 | 660.35  | 3.05   |
| P06396 GELS_HUMAN Gelsolin                  | 2  |                       | VPFDAATLHTSTAMAAQHGMDD<br>DGTGQK | 419 | 28 | 10 | 32.4   | b7b7b9b13y6y6y10y13y19y28                      | 2873.27 | 56.518  | 191220  | 4 | 719.07  | -4.08  |
| P06396 GELS_HUMAN Gelsolin                  | 3  |                       | TGAQELLR                         | 615 | 8  | 6  | 66     | y3y4y5y5y6y7                                   | 887.49  | 40.651  | 125278  | 2 | 444.25  | -7.01  |
| P06396 GELS_HUMAN Gelsolin                  | 4  |                       | NWRDPDQTDGLGLSYLSSHIANV<br>ER    | 394 | 25 | 13 | 65.8   | b2b3b4b6b14y4y5y8y9y12y14y14y25                | 2843.34 | 77.696  | 108196  | 4 | 711.59  | -9.44  |
| P06396 GELS_HUMAN Gelsolin                  | 5  |                       | AQPVQVAEGSEPDGFWEALGGK           | 626 | 22 | 19 | 79.14  | b2b2b3b4b4b6b9b11b11y2y3y4y6y11y11y14y14y16y22 | 2272.11 | 82.100  | 104166  | 2 | 1136.56 | 7.63   |
| P06396 GELS_HUMAN Gelsolin                  | 6  |                       | QTQVSVLPEGGETPLFK                | 373 | 17 | 12 | 76.45  | b3b4b4b5b5y2y4y10y12y13y14y17                  | 1829.97 | 72.604  | 91977   | 2 | 915.49  | 2.60   |
| P06396 GELS_HUMAN Gelsolin                  | 7  |                       | AGKEPGLQIWR                      | 61  | 11 | 14 | 108.27 | b1b4b6b7b8b8y1y3y4y6y7y7y8y11                  | 1254.68 | 55.554  | 72470   | 3 | 418.90  | -12.45 |
| P06396 GELS_HUMAN Gelsolin                  | 8  |                       | TPSAAYLWVGTGASEAEK               | 597 | 18 | 7  | 29.94  | b2b2b5b7b14y4y11                               | 1837.89 | 67.804  | 62914   | 2 | 919.45  | -2.59  |
| P06396 GELS_HUMAN Gelsolin                  | 9  | Carbamidomethyl+C(4)  | SEDCFILDHGK                      | 327 | 11 | 8  | 46.57  | b2y1y3y4y5y9y9y11                              | 1320.58 | 48.017  | 36122   | 3 | 440.86  | -10.45 |
| P06396 GELS_HUMAN Gelsolin                  | 10 |                       | HVVVNEVVVQR                      | 177 | 11 | 11 | 99.13  | b2b3b7b7y3y4y5y8y9y10y11                       | 1275.71 | 37.631  | 34573   | 2 | 638.36  | -2.39  |
| P06396 GELS_HUMAN Gelsolin                  | 11 |                       | VSNGAGTMSVSLVADENPFAQGA<br>LK    | 302 | 25 | 8  | 22.51  | b8y6y11y11y12y12y25y25                         | 2463.23 | 82.233  | 13129   | 2 | 1232.12 | 5.95   |

|                                                    |    |                                                 |                                      |      |    |    |        |                                                                          |         |        |         |   |         |        |
|----------------------------------------------------|----|-------------------------------------------------|--------------------------------------|------|----|----|--------|--------------------------------------------------------------------------|---------|--------|---------|---|---------|--------|
| IP06396 GELS_HUMAN Gelsolin                        | 12 |                                                 | TASDFITK                             | 360  | 8  | 5  | 32.34  | b7y6°y6y7°y7                                                             | 882.45  | 37.638 | 73742   | 2 | 441.73  | -6.50  |
| IP06396 GELS_HUMAN Gelsolin                        | 13 |                                                 | EVQGFESATFLGYFK                      | 147  | 15 | 3  | 25.65  | y4y6y12                                                                  | 1722.85 | 89.846 | 57282   | 2 | 861.93  | 5.74   |
| IP06396 GELS_HUMAN Gelsolin                        | 14 | Carbamidomethyl+C(16)<br>;Carbamidomethyl+C(29) | ATEVPVSWESFNNGDCFILDGNIHQWCGSNSNR    | 199  | 35 | 20 | 138.49 | b3°b3b4b9°b9b11b13°b13y4y5y6y7y8y9y10y14y17y18y19y31                     | 4037.81 | 99.477 | 52967   | 3 | 1346.61 | 5.20   |
| IP06396 GELS_HUMAN Gelsolin                        | 15 |                                                 | DPDQTDGLGLSYLSSHIANVER               | 397  | 22 | 9  | 62.57  | b13°b13y3y4y5y11y12y14y16                                                | 2387.15 | 78.854 | 22824   | 3 | 796.39  | 3.07   |
| IP06396 GELS_HUMAN Gelsolin                        | 16 |                                                 | IFVWK                                | 341  | 5  | 1  | 12.94  | y4                                                                       | 692.40  | 61.634 | 19183   | 2 | 346.71  | -12.78 |
| IP06396 GELS_HUMAN Gelsolin                        | 17 |                                                 | VHVSEEGTEPEAMLQVLGPKPALPAGTEDTAK     | 257  | 32 | 5  | 24.18  | b9y5y7y8y19                                                              | 3301.65 | 73.872 | 10313   | 3 | 1101.22 | -3.85  |
| IP06396 GELS_HUMAN Gelsolin                        | 18 |                                                 | QANTEER                              | 348  | 7  | 6  | 49.62  | b5°b5y3y4°y4y5                                                           | 847.41  | 62.255 | 4564    | 1 | 847.41  | 22.04  |
| IP06396 GELS_HUMAN Gelsolin                        | 19 |                                                 | VPEARPNMVMVEHPEFLK                   | 43   | 18 | 3  | 15.09  | b13b15y14                                                                | 2079.02 | 66.002 | 3691    | 3 | 693.68  | -21.96 |
| IP06396 GELS_HUMAN Gelsolin                        | 20 |                                                 | IEGSNKVPVDPATYQGQFYGGDSYIILYNYR      | 451  | 30 | 14 | 107.27 | b7b10°b10b13b25y3y4y5y6y11y12y13y14y23                                   | 3399.67 | 84.461 | 67063   | 3 | 1133.90 | 5.17   |
| IP06396 GELS_HUMAN Gelsolin                        | 21 | Carbamidomethyl+C(4)                            | SEDCFILDHGKDGK                       | 327  | 14 | 9  | 83.89  | b3b7b10b12y3y5y7°y7y11                                                   | 1620.73 | 42.279 | 58310   | 3 | 540.91  | -3.24  |
| IP06396 GELS_HUMAN Gelsolin                        | 22 |                                                 | KMDAHPPR                             | 660  | 8  | 4  | 32.34  | b5b6y7°y7                                                                | 951.48  | 98.512 | 9195    | 1 | 951.48  | -6.29  |
| IP06396 GELS_HUMAN Gelsolin                        | 23 | Carbamidomethyl+C(16)<br>;Carbamidomethyl+C(29) | ATEVPVSWESFNNGDCFILDGNIHQWCGSNSNRYER | 199  | 38 | 7  | 26.89  | b3°b3b5b7b12b13y4                                                        | 4486.01 | 96.679 | 7584    | 4 | 1122.26 | 2.18   |
| IP06396 GELS_HUMAN Gelsolin                        | 24 |                                                 | TASDFITKMDYPK                        | 360  | 13 | 9  | 81.42  | b6b7b10y6y9y10y11°y11y12                                                 | 1516.75 | 54.850 | 6931    | 2 | 758.88  | 11.11  |
| IP06396 GELS_HUMAN Gelsolin                        | 25 |                                                 | NWRDPDQTDGLGLSYLSSHIANVER            | 394  | 25 | 4  | 12.09  | b3b13°b13y9                                                              | 2843.34 | 87.216 | 5732    | 3 | 948.45  | -12.11 |
| IP06396 GELS_HUMAN Gelsolin                        | 26 |                                                 | QANTEERK                             | 348  | 8  | 4  | 32.34  | b4°b4y5y6                                                                | 975.50  | 28.621 | 1748    | 2 | 488.25  | 11.95  |
| IP06396 GELS_HUMAN Gelsolin                        | 27 | Phosphoryl STY(5)                               | QTQVSVLPEGGETPLFK                    | 373  | 17 | 5  | 25.35  | b3°b3b6b10_H3PO4b10y13                                                   | 1909.93 | 73.092 | 165807  | 2 | 955.47  | 2.05   |
| IP06396 GELS_HUMAN Gelsolin                        | 28 | Phosphoryl STY()                                | TEALTSAKR                            | 720  | 9  | 4  | 29.76  | b3b4°b4y5                                                                | 1056.51 | 62.284 | 3630    | 2 | 528.76  | 9.01   |
| IP06396 GELS_HUMAN Gelsolin                        | 29 | Phosphoryl STY(9)                               | EVQGFESATFLGYFK                      | 147  | 15 | 4  | 25.65  | y5y7y9°y9                                                                | 1802.82 | 55.887 | 2322    | 2 | 901.91  | 13.68  |
| IP06396 GELS_HUMAN Gelsolin                        | 30 | Oxidation+M(9)                                  | VPEARPNMVMVEHPEFLK                   | 43   | 18 | 3  | 22.25  | b4b9b17                                                                  | 2095.08 | 80.614 | 2308    | 2 | 1048.04 | 5.48   |
| IP06396 GELS_HUMAN Gelsolin                        | 31 | Carbamidomethyl+C(2)                            | DCFILDHGK                            | 329  | 9  | 0  | 2.58   |                                                                          | 1104.52 | 47.994 | 2501    | 2 | 552.76  | 6.41   |
| A5A3E0 A26CB_HUMAN ANKRD26-like family C member 1B | 1  |                                                 | SYELPDGQVITIGNER                     | 938  | 16 | 27 | 206.97 | b2b3°b3b6b8b9°b9b10b12°b12y3°y3y4°y4y5y6°y6y7y8y9y10y11°y11y12°y12y13y16 | 1790.90 | 70.748 | 2649301 | 2 | 895.95  | 2.39   |
| A5A3E0 A26CB_HUMAN ANKRD26-like family C member 1B | 2  |                                                 | AGFAGDDAPR                           | 718  | 10 | 20 | 141.51 | b1b2b3b4b5b8y1y2y3y4°y4y5°y5y6°y6y7°y7y8y9y10                            | 976.44  | 30.235 | 1748916 | 2 | 488.73  | -3.50  |
| A5A3E0 A26CB_HUMAN ANKRD26-like family C member 1B | 3  |                                                 | AVFPSIVGRPR                          | 728  | 11 | 13 | 106.12 | b1b2y1y2y3y4y5y6y7y8°y8y9y10                                             | 1198.71 | 55.587 | 1143213 | 2 | 599.86  | 3.56   |
| A5A3E0 A26CB_HUMAN ANKRD26-like family C member 1B | 4  |                                                 | QEYDESGPSIVHRK                       | 1059 | 14 | 19 | 150.15 | b3°b3b4°b4b14y2y3y4y5y6y7y8y9y10°y10y11y12y14°y14                        | 1644.79 | 31.141 | 419977  | 3 | 548.93  | -5.94  |
| A5A3E0 A26CB_HUMAN ANKRD26-like family C member 1B | 5  |                                                 | QEYDESGPSIVHR                        | 1059 | 13 | 6  | 57.36  | y1y3y4y5y6y11                                                            | 1516.69 | 37.100 | 276634  | 3 | 506.24  | -5.63  |
| A5A3E0 A26CB_HUMAN ANKRD26-like family C member 1B | 6  |                                                 | VVEVDSMPAASSVK                       | 1    | 14 | 5  | 24.13  | b9y12°y12y13y14                                                          | 1418.73 | 49.725 | 118609  | 2 | 709.87  | 6.11   |
| A5A3E0 A26CB_HUMAN ANKRD26-like family C member 1B | 7  |                                                 | SQEPEINKDGDRELENFMAIEMK              | 519  | 24 | 6  | 18.68  | y2y3°y3y5y11y24                                                          | 2852.34 | 94.021 | 35960   | 3 | 951.45  | 11.81  |

|                                                    |    |                                                                                                 |                            |     |    |   |       |                            |         |         |       |   |         |        |
|----------------------------------------------------|----|-------------------------------------------------------------------------------------------------|----------------------------|-----|----|---|-------|----------------------------|---------|---------|-------|---|---------|--------|
| A5A3E0 A26CB_HUMAN ANKRD26-like family C member 1B | 8  |                                                                                                 | ISSENSNPEQDLK              | 367 | 13 | 9 | 57.36 | y4y5°y5y9*y9y10°y10y11°y11 | 1460.67 | 53.693  | 20231 | 3 | 487.56  | -10.36 |
| A5A3E0 A26CB_HUMAN ANKRD26-like family C member 1B | 9  | Carbamidomethyl+C(9)                                                                            | MNSELSLCK                  | 629 | 10 | 3 | 40.98 | y5y7y9                     | 1168.55 | 58.357  | 5907  | 2 | 584.78  | 9.72   |
| A5A3E0 A26CB_HUMAN ANKRD26-like family C member 1B | 10 |                                                                                                 | ELENFMAIEEMKK              | 531 | 13 | 4 | 20.02 | b3°b3y5y10                 | 1611.78 | 86.458  | 5380  | 2 | 806.39  | 3.48   |
| A5A3E0 A26CB_HUMAN ANKRD26-like family C member 1B | 11 | Carbamidomethyl+C(25)                                                                           | ALQLNELTMDDDTAVLVIDNGSGMCK | 692 | 26 | 3 | 11.85 | b10b12y5                   | 2823.30 | 72.470  | 4746  | 2 | 1412.16 | -6.31  |
| A5A3E0 A26CB_HUMAN ANKRD26-like family C member 1B | 12 | Carbamidomethyl+C(2)                                                                            | ICELLSDYKEK                | 470 | 11 | 3 | 35.39 | b4b5b6                     | 1397.68 | 60.598  | 1678  | 2 | 699.35  | -9.78  |
| A5A3E0 A26CB_HUMAN ANKRD26-like family C member 1B | 13 |                                                                                                 | EEIAMLRL                   | 652 | 7  | 4 | 39.69 | b3b5b6°b6                  | 861.43  | 28.651  | 32810 | 1 | 861.43  | -18.00 |
| A5A3E0 A26CB_HUMAN ANKRD26-like family C member 1B | 14 |                                                                                                 | DILHENSTLR                 | 642 | 10 | 3 | 27.97 | b9y7y8                     | 1197.65 | 54.983  | 28244 | 2 | 599.33  | 20.49  |
| A5A3E0 A26CB_HUMAN ANKRD26-like family C member 1B | 15 | Carbamidomethyl+C(2)                                                                            | LCYVALDFEQEMATVASSSLEK     | 915 | 23 | 3 | 12.68 | b19y5y13                   | 2578.24 | 117.026 | 21887 | 3 | 860.09  | 14.77  |
| A5A3E0 A26CB_HUMAN ANKRD26-like family C member 1B | 16 |                                                                                                 | ELENFMAIEEMK               | 531 | 12 | 4 | 25.61 | b9°b9y9y10                 | 1483.69 | 54.824  | 8634  | 3 | 495.23  | 5.10   |
| A5A3E0 A26CB_HUMAN ANKRD26-like family C member 1B | 17 |                                                                                                 | SNVGASGDHDDSAMK            | 77  | 15 | 3 | 17.57 | b3b13y10                   | 1490.63 | 32.840  | 8324  | 2 | 745.82  | 9.58   |
| A5A3E0 A26CB_HUMAN ANKRD26-like family C member 1B | 18 |                                                                                                 | SQEPEINK                   | 519 | 8  | 8 | 66    | b4b7*b7y3*y3y6y7*y7        | 944.47  | 42.260  | 6474  | 2 | 472.74  | 3.88   |
| A5A3E0 A26CB_HUMAN ANKRD26-like family C member 1B | 19 |                                                                                                 | DLYTNTVLSSGGTTMYPGMAHR     | 991 | 21 | 5 | 20.1  | b3b11b13°b13*b13           | 2285.11 | 83.348  | 6345  | 3 | 762.37  | 15.92  |
| A5A3E0 A26CB_HUMAN ANKRD26-like family C member 1B | 20 |                                                                                                 | LTSEESQR                   | 380 | 9  | 3 | 29.76 | b4b8y3                     | 1078.49 | 53.633  | 2022  | 1 | 1078.49 | -6.68  |
| A5A3E0 A26CB_HUMAN ANKRD26-like family C member 1B | 21 |                                                                                                 | LELDTMK                    | 659 | 7  | 4 | 49.62 | b3b5b6y6                   | 849.42  | 89.931  | 1658  | 1 | 849.42  | -17.39 |
| A5A3E0 A26CB_HUMAN ANKRD26-like family C member 1B | 22 | Carbamidomethyl+C(2)                                                                            | ICELLSDYK                  | 470 | 9  | 4 | 29.76 | b3°b3b5y7                  | 1140.55 | 98.447  | 1579  | 1 | 1140.55 | -12.20 |
| A5A3E0 A26CB_HUMAN ANKRD26-like family C member 1B | 23 |                                                                                                 | EEIAMLRLLELDTMK            | 652 | 14 | 4 | 34.25 | y3y4y5°y5                  | 1691.88 | 76.040  | 47272 | 2 | 846.44  | 4.76   |
| A5A3E0 A26CB_HUMAN ANKRD26-like family C member 1B | 24 | Carbamidomethyl+C(2);<br>Carbamidomethyl+C(5);<br>Carbamidomethyl+C(8);<br>Carbamidomethyl+C(9) | WCRHCFCCR                  | 63  | 10 | 3 | 26.21 | b4y4y7                     | 1538.59 | 24.671  | 33711 | 2 | 769.80  | -6.35  |
| A5A3E0 A26CB_HUMAN ANKRD26-like family C member 1B | 25 |                                                                                                 | FKGSENSQPEK                | 389 | 11 | 6 | 34.35 | b5b9y7°y7*y7y9             | 1250.60 | 98.522  | 26573 | 2 | 625.80  | -0.88  |
| A5A3E0 A26CB_HUMAN ANKRD26-like family C member 1B | 26 | Carbamidomethyl+C(12)                                                                           | EYAVSSHHVICQLLSYKEK        | 342 | 21 | 5 | 13.46 | b12°b12y4y10°y10           | 2543.22 | 66.089  | 15586 | 4 | 636.56  | -6.91  |

|                                                    |    |                                                                          |                                    |      |    |    |       |                                                     |         |         |         |   |         |        |
|----------------------------------------------------|----|--------------------------------------------------------------------------|------------------------------------|------|----|----|-------|-----------------------------------------------------|---------|---------|---------|---|---------|--------|
| A5A3E0 A26CB_HUMAN ANKRD26-like family C member 1B | 27 | Carbamidomethyl+C(1)                                                     | CQLNVLDNKK                         | 196  | 10 | 3  | 27.97 | b4b5y6                                              | 1231.66 | 54.917  | 9487    | 2 | 616.33  | 9.42   |
| A5A3E0 A26CB_HUMAN ANKRD26-like family C member 1B | 28 |                                                                          | YSSENSNPEQDLKLTSEESQR              | 485  | 22 | 5  | 24.65 | b12b14y4y6y10                                       | 2570.18 | 125.526 | 7237    | 3 | 857.40  | 10.26  |
| A5A3E0 A26CB_HUMAN ANKRD26-like family C member 1B | 29 |                                                                          | QMPKYSSSENSNPEQDLK                 | 481  | 17 | 6  | 25.35 | b11y8°y8*y8y10y12                                   | 1994.94 | 114.953 | 6042    | 2 | 997.97  | 11.63  |
| A5A3E0 A26CB_HUMAN ANKRD26-like family C member 1B | 30 |                                                                          | LKGSENGQPEK                        | 507  | 11 | 5  | 23.63 | b5b8°b8*b8y8                                        | 1186.59 | 29.972  | 4709    | 3 | 396.20  | -13.58 |
| A5A3E0 A26CB_HUMAN ANKRD26-like family C member 1B | 31 |                                                                          | YHVRGEDLDK                         | 132  | 10 | 3  | 26.21 | b7b9y5                                              | 1231.62 | 62.292  | 4336    | 2 | 616.32  | 14.07  |
| A5A3E0 A26CB_HUMAN ANKRD26-like family C member 1B | 32 |                                                                          | QMLKISSENSNPEQDLK                  | 363  | 17 | 4  | 15.8  | b9°b9b16y6                                          | 1960.95 | 69.031  | 4097    | 2 | 980.98  | -6.85  |
| A5A3E0 A26CB_HUMAN ANKRD26-like family C member 1B | 33 | Carbamidomethyl+C(16)                                                    | QIEVVEKMNSLSLCK                    | 622  | 17 | 3  | 22.78 | b11b12y12                                           | 1993.98 | 81.263  | 4022    | 2 | 997.49  | -8.57  |
| A5A3E0 A26CB_HUMAN ANKRD26-like family C member 1B | 34 |                                                                          | ESYVGKEAQSK                        | 750  | 11 | 3  | 23.63 | b5b7y10                                             | 1225.60 | 36.918  | 3910    | 2 | 613.30  | -6.18  |
| A5A3E0 A26CB_HUMAN ANKRD26-like family C member 1B | 35 | Carbamidomethyl+C(3);<br>Carbamidomethyl+C(11);<br>Carbamidomethyl+C(18) | FRCPEALFQPCFLGMESCGIHETTF<br>NSIMK | 954  | 30 | 5  | 35.88 | y13y14°y14y15y17                                    | 3607.65 | 89.953  | 3197    | 3 | 1203.22 | 4.47   |
| A5A3E0 A26CB_HUMAN ANKRD26-like family C member 1B | 36 |                                                                          | LTSEESQRFK                         | 380  | 11 | 7  | 26.64 | b9°b9y8*y8y9°y9*y9                                  | 1353.65 | 41.609  | 2330    | 2 | 677.33  | -8.03  |
| A5A3E0 A26CB_HUMAN ANKRD26-like family C member 1B | 37 |                                                                          | SQPEINKDGDR                        | 519  | 12 | 4  | 21.63 | b4b10y11*y11                                        | 1387.63 | 73.197  | 1560    | 3 | 463.21  | -13.28 |
| A5A3E0 A26CB_HUMAN ANKRD26-like family C member 1B | 38 | Carbamidomethyl+C(12);<br>Phosphoryl STY()                               | EYAVSSHHVICQLSDYKEK                | 342  | 21 | 9  | 36.33 | b8°b8b12_H3PO4<br>b12b16_H3PO4<br>b16°b16y4y5°y5y18 | 2623.20 | 121.157 | 23294   | 3 | 875.07  | 4.93   |
| A5A3E0 A26CB_HUMAN ANKRD26-like family C member 1B | 39 | Phosphoryl STY()                                                         | MQKEI AALAPSMK                     | 1012 | 14 | 8  | 58.97 | b3b4b5°b5*b5b10b11y3                                | 1628.73 | 85.340  | 7929    | 2 | 814.87  | -14.39 |
| A5A3E0 A26CB_HUMAN ANKRD26-like family C member 1B | 40 | Oxidation+M()                                                            | ELENFMAIEEMKK                      | 531  | 13 | 3  | 24.79 | b3y10y11                                            | 1627.77 | 91.279  | 8488    | 2 | 814.39  | -3.15  |
| A5A3E0 A26CB_HUMAN ANKRD26-like family C member 1B | 41 | Oxidation+M()                                                            | ELENFMAIEEMK                       | 531  | 12 | 4  | 21.63 | b8°b8y3y6                                           | 1499.66 | 106.426 | 5307    | 3 | 500.56  | -8.14  |
| A5A3E0 A26CB_HUMAN ANKRD26-like family C member 1B | 42 | Oxidation+M()                                                            | SQPEINKDGDRELENFMAIEEMK            | 519  | 24 | 5  | 26.69 | b6b8b9y7y20                                         | 2868.34 | 86.972  | 4560    | 4 | 717.84  | 12.09  |
| A5A3E0 A26CB_HUMAN ANKRD26-like family C member 1B | 43 | Oxidation+M(1)                                                           | MTQIMFETFNTPAMYVAIQAVLSL<br>YTSGR  | 818  | 29 | 4  | 14.03 | b5b10y5y7                                           | 3299.64 | 77.269  | 3293    | 4 | 825.67  | 8.21   |
| A5A3E0 A26CB_HUMAN ANKRD26-like family C member 1B | 44 | Oxidation+M()                                                            | EVEEEMKK                           | 413  | 8  | 3  | 35.35 | b3y4y7                                              | 1037.49 | 110.552 | 1532    | 1 | 1037.49 | 11.18  |
| P12814 ACTN1_HUMAN Alpha-actinin-1                 | 1  |                                                                          | ASIHEAWTDGK                        | 402  | 11 | 11 | 58.65 | b1b4b5°b5b10°b10y1y4<br>y5y9y11                     | 1214.58 | 40.164  | 1063993 | 2 | 607.79  | 0.20   |



|                                    |    |                       |                                    |     |    |    |        |                                                                                     |         |         |        |   |         |        |
|------------------------------------|----|-----------------------|------------------------------------|-----|----|----|--------|-------------------------------------------------------------------------------------|---------|---------|--------|---|---------|--------|
| P12814 ACTN1_HUMAN Alpha-actinin-1 | 2  |                       | VGWEQLLTIAR                        | 714 | 12 | 14 | 119.42 | b3b4b6*b6y2y3y4y5y6y7y8*y8y9y12                                                     | 1386.77 | 97.469  | 181079 | 2 | 693.89  | -2.99  |
| P12814 ACTN1_HUMAN Alpha-actinin-1 | 3  |                       | AIMTYVSSFYHAFSGAQK                 | 236 | 18 | 29 | 193.36 | b2b3b5*b5b8b10b12b13y2y4*y4y5*y5y6*y6y7y8y9y10*y8y10y11*y11y12*y12*y12y13y16*y16y18 | 2007.95 | 89.948  | 152323 | 3 | 669.99  | -6.81  |
| P12814 ACTN1_HUMAN Alpha-actinin-1 | 4  |                       | MLDAEDIVGTARPDEK                   | 220 | 16 | 6  | 23.15  | b11*b11y11*y11y12y16                                                                | 1759.85 | 59.747  | 122060 | 3 | 587.29  | -2.77  |
| P12814 ACTN1_HUMAN Alpha-actinin-1 | 5  |                       | IDQLEGDHLQIQEALIFDNK               | 684 | 20 | 9  | 53.73  | b3b13y1y3y4*y4y5y6y20                                                               | 2339.19 | 81.504  | 119382 | 3 | 780.40  | -1.04  |
| P12814 ACTN1_HUMAN Alpha-actinin-1 | 6  |                       | VEQIAAIAQELNELDYDPSVNA<br>R        | 450 | 25 | 23 | 144.79 | b2b3b4*b4b5b6b7y2y3*y3y4*y4y5y6*y6y7y8y10y12*y12y14*y14y25                          | 2808.38 | 94.031  | 95212  | 3 | 936.80  | 5.22   |
| P12814 ACTN1_HUMAN Alpha-actinin-1 | 7  |                       | TINEVENQILTR                       | 726 | 12 | 9  | 48.48  | b2*b2b10y1y3y4y6y10y12                                                              | 1429.77 | 59.473  | 91770  | 2 | 715.39  | 3.59   |
| P12814 ACTN1_HUMAN Alpha-actinin-1 | 8  | Carbamidomethyl+C(11) | MVSDINNAWGCLEQVEK                  | 359 | 17 | 11 | 62.61  | y5y8y9y10*y10*y10y11y15*y15*y15y17                                                  | 1992.93 | 75.723  | 90407  | 2 | 996.97  | 6.80   |
| P12814 ACTN1_HUMAN Alpha-actinin-1 | 9  |                       | LASDLLEWIR                         | 281 | 10 | 7  | 59.87  | b8y2y3y4y8y9y10                                                                     | 1215.66 | 91.400  | 74825  | 2 | 608.34  | -8.64  |
| P12814 ACTN1_HUMAN Alpha-actinin-1 | 10 |                       | ALDFIASK                           | 95  | 8  | 10 | 48.29  | b1b3*b3y2*y2y3y5y6*y6y8                                                             | 864.48  | 54.909  | 59981  | 2 | 432.74  | -8.12  |
| P12814 ACTN1_HUMAN Alpha-actinin-1 | 11 |                       | IVQTYHVN MAGTNPYTTITPQEIN<br>GK    | 577 | 26 | 8  | 37.06  | b3b13y3y7y8y11y13y26                                                                | 2890.44 | 63.840  | 45081  | 3 | 964.15  | 1.18   |
| P12814 ACTN1_HUMAN Alpha-actinin-1 | 12 |                       | LLETIDQLYLEYAKR                    | 502 | 15 | 9  | 38.8   | b2b3y1y6y7y11*y11y13y15                                                             | 1868.00 | 85.207  | 42654  | 3 | 623.34  | -6.53  |
| P12814 ACTN1_HUMAN Alpha-actinin-1 | 13 |                       | RDQALTEEHAR                        | 613 | 11 | 12 | 74.6   | b1b2b3b4b5b7y1y2y3y5y6y11                                                           | 1325.64 | 16.479  | 38764  | 3 | 442.55  | -9.67  |
| P12814 ACTN1_HUMAN Alpha-actinin-1 | 14 |                       | ATLPDADKER                         | 555 | 10 | 8  | 50.91  | b2y1y2y3y4y5y7y10                                                                   | 1115.57 | 25.100  | 32168  | 2 | 558.29  | -0.22  |
| P12814 ACTN1_HUMAN Alpha-actinin-1 | 15 | Carbamidomethyl+C(1)  | CQLEINFNTLQTK                      | 331 | 13 | 6  | 29.26  | b2*b2b3b10b12y13                                                                    | 1608.81 | 69.704  | 24833  | 2 | 804.91  | 0.68   |
| P12814 ACTN1_HUMAN Alpha-actinin-1 | 16 |                       | DQALTEEHAR                         | 614 | 10 | 10 | 66.86  | b2*b2b10y2y3y4y5*y5y6y8                                                             | 1169.55 | 20.091  | 5841   | 2 | 585.28  | -3.55  |
| P12814 ACTN1_HUMAN Alpha-actinin-1 | 17 |                       | ASFNFHFRDRHSGTLGPEEFK              | 752 | 20 | 6  | 22.06  | b10y1y2y11y12y20                                                                    | 2291.06 | 115.392 | 2912   | 3 | 764.36  | 5.97   |
| P12814 ACTN1_HUMAN Alpha-actinin-1 | 18 | Carbamidomethyl+C(2)  | ICDQWDNLGALTQK                     | 478 | 14 | 6  | 55.57  | y3y4y6y9y12*y12                                                                     | 1661.76 | 69.421  | 142514 | 2 | 831.39  | -19.39 |
| P12814 ACTN1_HUMAN Alpha-actinin-1 | 19 |                       | VPENTMHAMQQK                       | 300 | 12 | 4  | 21.63  | b9*b9b11y10                                                                         | 1413.63 | 49.860  | 116552 | 3 | 471.88  | -19.26 |
| P12814 ACTN1_HUMAN Alpha-actinin-1 | 20 |                       | LAILGIHNEVSK                       | 565 | 12 | 4  | 21.63  | b3y5*y5y9                                                                           | 1293.73 | 57.987  | 112089 | 3 | 431.91  | -18.59 |
| P12814 ACTN1_HUMAN Alpha-actinin-1 | 21 |                       | VLAVNQENEQLMEDYEK                  | 264 | 17 | 3  | 24.45  | y4y12y13                                                                            | 2051.97 | 61.230  | 89305  | 2 | 1026.49 | 4.64   |
| P12814 ACTN1_HUMAN Alpha-actinin-1 | 22 |                       | MAPYTGPDSPVPGALDYMSFSTAL<br>YGESDL | 863 | 29 | 6  | 14.03  | b12b14y9*y9y12*y12                                                                  | 3055.41 | 118.133 | 33699  | 4 | 764.61  | 16.22  |
| P12814 ACTN1_HUMAN Alpha-actinin-1 | 23 | Carbamidomethyl+C(2)  | ACLISLGYDIGNDPQGEAEFAR             | 772 | 22 | 3  | 13.05  | b3b6y7                                                                              | 2396.16 | 80.877  | 20369  | 3 | 799.39  | 18.24  |
| P12814 ACTN1_HUMAN Alpha-actinin-1 | 24 |                       | AGTQIENIEEDFR                      | 47  | 13 | 4  | 28.77  | b4b10y9y11                                                                          | 1521.74 | 53.640  | 13147  | 3 | 507.92  | 13.88  |
| P12814 ACTN1_HUMAN Alpha-actinin-1 | 25 |                       | QQHNER                             | 624 | 6  | 5  | 39.26  | b4y4y5*y5*y5                                                                        | 811.38  | 42.272  | 7077   | 2 | 406.19  | -5.27  |
| P12814 ACTN1_HUMAN Alpha-actinin-1 | 26 |                       | LGVVTFQAFIDFMSR                    | 803 | 15 | 3  | 25.65  | b3b13b14                                                                            | 1730.89 | 91.920  | 5079   | 2 | 865.95  | -4.23  |
| P12814 ACTN1_HUMAN Alpha-actinin-1 | 27 |                       | DDPLTNLNTAFDVAEK                   | 198 | 16 | 6  | 26.85  | b12*b12y7*y7y9y15                                                                   | 1762.87 | 45.757  | 3914   | 3 | 588.29  | 10.73  |

|                                    |    |                                             |                                          |     |    |   |       |                                                          |         |         |       |   |         |        |
|------------------------------------|----|---------------------------------------------|------------------------------------------|-----|----|---|-------|----------------------------------------------------------|---------|---------|-------|---|---------|--------|
| P12814 ACTN1_HUMAN Alpha-actinin-1 | 28 |                                             | NYITMDEL R                               | 840 | 9  | 3 | 37.54 | y4y5y6                                                   | 1154.53 | 54.830  | 3525  | 1 | 1154.53 | -21.46 |
| P12814 ACTN1_HUMAN Alpha-actinin-1 | 29 |                                             | IMSVDPNR                                 | 794 | 9  | 3 | 29.76 | b6y3y7                                                   | 1044.53 | 78.966  | 2212  | 1 | 1044.53 | -21.15 |
| P12814 ACTN1_HUMAN Alpha-actinin-1 | 30 |                                             | TIPWLENRV PENTMHAMQKQ                    | 292 | 20 | 3 | 13.93 | b4b13y7                                                  | 2423.17 | 67.576  | 62848 | 4 | 606.55  | -10.98 |
| P12814 ACTN1_HUMAN Alpha-actinin-1 | 31 |                                             | IVQTYHVN MAGTNPYTITPQEIN<br>GKWDHVR      | 577 | 31 | 7 | 37.11 | b10b12b13y3y10y12y13                                     | 3583.73 | 67.301  | 60016 | 5 | 717.55  | -13.15 |
| P12814 ACTN1_HUMAN Alpha-actinin-1 | 32 |                                             | IDQLEGDHQLIQEALIFDNKHTNY<br>TMEHIR       | 684 | 30 | 5 | 21.51 | b9y9*y9y10y14                                            | 3621.74 | 75.622  | 57163 | 5 | 725.15  | -9.71  |
| P12814 ACTN1_HUMAN Alpha-actinin-1 | 33 |                                             | ILAGDKNYITMDEL R                         | 834 | 15 | 5 | 25.65 | y5*y5y6*y6y8                                             | 1751.89 | 62.208  | 29560 | 3 | 584.63  | -8.08  |
| P12814 ACTN1_HUMAN Alpha-actinin-1 | 34 | Carbamidomethyl+C(2)                        | ACLISLGYDIGNDPQGEAEFARIMS<br>IVDPNR      | 772 | 31 | 5 | 13.41 | b11*b11b15y5y29                                          | 3421.60 | 84.469  | 23498 | 4 | 856.16  | -14.77 |
| P12814 ACTN1_HUMAN Alpha-actinin-1 | 35 |                                             | RDQALTEEHAR                              | 613 | 11 | 3 | 30.62 | b4b8b9                                                   | 1325.66 | 53.684  | 9290  | 2 | 663.34  | 5.43   |
| P12814 ACTN1_HUMAN Alpha-actinin-1 | 36 |                                             | MEEIGRISIEMHGTLEDQLSHLR                  | 649 | 23 | 4 | 16.84 | b6b12y4y12                                               | 2694.34 | 90.693  | 8926  | 4 | 674.34  | 3.17   |
| P12814 ACTN1_HUMAN Alpha-actinin-1 | 37 |                                             | VPENTMHAMQKLEDFR                         | 300 | 17 | 4 | 36.14 | b7b8b9y11                                                | 2074.01 | 76.333  | 6482  | 3 | 692.01  | 11.30  |
| P12814 ACTN1_HUMAN Alpha-actinin-1 | 38 |                                             | DQALTEEHARQQHNER                         | 614 | 16 | 5 | 26.85 | b9b11b15y4*y4                                            | 1961.90 | 53.813  | 5748  | 4 | 491.23  | -7.96  |
| P12814 ACTN1_HUMAN Alpha-actinin-1 | 39 |                                             | DDPLTNLNTAFDVAEKYLDIPK                   | 198 | 22 | 5 | 36.48 | b5b6b7*b7b13                                             | 2492.22 | 101.851 | 5610  | 3 | 831.41  | -13.42 |
| P12814 ACTN1_HUMAN Alpha-actinin-1 | 40 |                                             | AIMTYVSSFYHAFSGAQKAETAA<br>NR            | 236 | 25 | 3 | 21.64 | b12y6y7                                                  | 2721.33 | 75.468  | 3197  | 3 | 907.78  | 8.70   |
| P12814 ACTN1_HUMAN Alpha-actinin-1 | 41 |                                             | KHEAFESDLAAHQDR                          | 435 | 15 | 3 | 17.57 | b6y8y13                                                  | 1753.81 | 64.206  | 1832  | 2 | 877.41  | -10.30 |
| P12814 ACTN1_HUMAN Alpha-actinin-1 | 42 | Carbamidomethyl+C(2);<br>Phosphoryl STY(12) | ICDQWDLGALTQKR                           | 478 | 15 | 9 | 44.42 | b9_H3PO4<br>b9*b10_HPO3<br>b9b10b11*b11y7y11*y1<br>1*y11 | 1897.88 | 42.309  | 38240 | 3 | 633.30  | 11.96  |
| P12814 ACTN1_HUMAN Alpha-actinin-1 | 43 | Carbamidomethyl+C(11)<br>;Phosphoryl STY()  | RELPPDQAEYCIAR                           | 849 | 14 | 4 | 32.14 | b9b10y10y13                                              | 1797.80 | 45.554  | 27998 | 3 | 599.94  | 8.42   |
| P12814 ACTN1_HUMAN Alpha-actinin-1 | 44 | Phosphoryl STY(8)                           | ISIEMHGTLEDQLSHLR                        | 655 | 17 | 9 | 32.93 | b7*b7b9y7*y7*y11_H<br>PO3 y10y11*y11                     | 2058.95 | 103.200 | 14506 | 3 | 686.99  | -5.10  |
| P12814 ACTN1_HUMAN Alpha-actinin-1 | 45 | Phosphoryl STY(2)                           | ASIHEAWTDGKEAMLR                         | 402 | 16 | 3 | 16.61 | b3y10y13                                                 | 1894.87 | 53.019  | 4641  | 2 | 947.94  | 12.88  |
| P12814 ACTN1_HUMAN Alpha-actinin-1 | 46 | Phosphoryl STY(11)                          | LAILGIHNEVSK                             | 565 | 12 | 4 | 21.63 | b9b11*b11y9                                              | 1373.73 | 43.563  | 2606  | 1 | 1373.73 | 12.26  |
| P12814 ACTN1_HUMAN Alpha-actinin-1 | 47 | Phosphoryl STY(31)                          | AAPFNWMEGAMEDLQDTFIVH<br>TIEEIQLTTAHEQFK | 517 | 38 | 4 | 51.2  | y4y5y6y7                                                 | 4442.04 | 114.739 | 2365  | 6 | 741.18  | 7.91   |
| P12814 ACTN1_HUMAN Alpha-actinin-1 | 48 | Oxidation+M()                               | AIMTYVSSFYHAFSGAQK                       | 236 | 18 | 4 | 15.09 | b7*b7b16y10                                              | 2023.96 | 100.656 | 32413 | 3 | 675.33  | 1.81   |
| P12814 ACTN1_HUMAN Alpha-actinin-1 | 49 | Oxidation+M(1)                              | MLDAEDIVGTARPDEK                         | 220 | 16 | 5 | 34.34 | b4b7y6y7y9                                               | 1775.87 | 29.266  | 8056  | 3 | 592.63  | 13.13  |
| P12814 ACTN1_HUMAN Alpha-actinin-1 | 50 | Oxidation+M(1)                              | MAPYTGPDSPGALDYMSFSTAL<br>YGESDL         | 863 | 29 | 4 | 16.42 | b3b5b14y11                                               | 3071.38 | 68.381  | 3478  | 3 | 1024.46 | 8.58   |
| P12814 ACTN1_HUMAN Alpha-actinin-1 | 51 | Carbamidomethyl+C(11)<br>;Oxidation+M(1)    | MVSDINNAWGCLEQVEK                        | 359 | 17 | 3 | 15.8  | b9b12y5                                                  | 2008.91 | 50.867  | 2000  | 2 | 1004.96 | 1.03   |
| P12814 ACTN1_HUMAN Alpha-actinin-1 | 52 |                                             | LPDADKER                                 | 557 | 8  | 0 | 2.15  |                                                          | 943.48  | 25.082  | 14890 | 2 | 472.25  | 0.06   |
| P12814 ACTN1_HUMAN Alpha-actinin-1 | 53 |                                             | PDADKER                                  | 558 | 7  | 2 | 22.02 | b3b4                                                     | 830.40  | 25.082  | 13827 | 2 | 415.70  | -3.09  |
| P12814 ACTN1_HUMAN Alpha-actinin-1 | 54 |                                             | TLPDADKER                                | 556 | 9  | 0 | 2.15  |                                                          | 1044.53 | 25.083  | 6642  | 2 | 522.77  | 1.64   |

|                                         |    |                                                              |                                             |     |    |    |        |                                         |         |         |        |   |         |        |
|-----------------------------------------|----|--------------------------------------------------------------|---------------------------------------------|-----|----|----|--------|-----------------------------------------|---------|---------|--------|---|---------|--------|
| P12814 ACTN1_HUMAN Alpha-actinin-1      | 55 |                                                              | LTEEHAR                                     | 617 | 7  | 0  | 2.58   |                                         | 855.43  | 16.454  | 2021   | 2 | 428.22  | -1.36  |
| P12814 ACTN1_HUMAN Alpha-actinin-1      | 56 |                                                              | ATLPDADKER                                  | 555 | 10 | 0  | 2.15   |                                         | 1097.54 | 25.094  | 2092   | 3 | 366.52  | -9.12  |
| P04350 TBB4_HUMAN Tubulin beta-4 chain  | 1  |                                                              | LAVNMVPPFR                                  | 252 | 10 | 10 | 85.76  | b2b5*b5y4y5y6y7y8y9y10                  | 1143.63 | 72.182  | 134998 | 2 | 572.32  | -5.34  |
| P04350 TBB4_HUMAN Tubulin beta-4 chain  | 2  |                                                              | SGPFGQIFRPDNFVFGQSGAGNNWAK                  | 77  | 26 | 10 | 30.87  | b2b13b14*b14y1y2y6y12y18y26             | 2798.35 | 89.252  | 124179 | 3 | 933.46  | 3.75   |
| P04350 TBB4_HUMAN Tubulin beta-4 chain  | 3  |                                                              | IMNTFSVVPSPK                                | 162 | 12 | 4  | 25.61  | b4y1y7y8                                | 1319.71 | 63.200  | 97959  | 2 | 660.36  | 6.94   |
| P04350 TBB4_HUMAN Tubulin beta-4 chain  | 4  | Carbamidomethyl+C(23)                                        | LTTPTYGDLNHLVSATMSGVTTCLR                   | 216 | 25 | 14 | 116.96 | y2y3y4y5y6y7°y7y8y10y12y13y14y22y25     | 2708.33 | 95.085  | 80004  | 3 | 903.45  | -1.35  |
| P04350 TBB4_HUMAN Tubulin beta-4 chain  | 5  | Carbamidomethyl+C(27);Carbamidomethyl+C(37)                  | VSDTVVEPYNATLSVHQLVENTD<br>ETYCIDNEALYDICFR | 174 | 39 | 10 | 23.76  | b6b8b12°b12*b12b13y1y7y9°y9             | 4593.04 | 89.055  | 41967  | 6 | 766.35  | -14.56 |
| P04350 TBB4_HUMAN Tubulin beta-4 chain  | 6  | Carbamidomethyl+C(5);Carbamidomethyl+C(7)                    | EAESCDCLQGFQLTHSLGGGTGSGMGTLISK             | 122 | 32 | 4  | 16.83  | y3y7y15y32                              | 3311.56 | 81.243  | 41273  | 3 | 1104.52 | 6.64   |
| P04350 TBB4_HUMAN Tubulin beta-4 chain  | 7  |                                                              | INVYYNEATGGNYVPR                            | 46  | 16 | 5  | 27.52  | b7y5y12y13*y13                          | 1829.88 | 81.246  | 19805  | 2 | 915.44  | -2.54  |
| P04350 TBB4_HUMAN Tubulin beta-4 chain  | 8  |                                                              | ISEQFTAMFRR                                 | 380 | 11 | 6  | 23.63  | b1b5b10*b10y8y11                        | 1385.70 | 71.875  | 2533   | 3 | 462.57  | -0.79  |
| P04350 TBB4_HUMAN Tubulin beta-4 chain  | 9  |                                                              | MAATFIGNSTAIQELFK                           | 362 | 17 | 3  | 15.8   | b6y3y10                                 | 1841.96 | 116.110 | 43130  | 3 | 614.66  | 9.08   |
| P04350 TBB4_HUMAN Tubulin beta-4 chain  | 10 |                                                              | EEFPDRIMNTFSVVPSPK                          | 156 | 18 | 6  | 37.82  | b7°b7b8b9b13*b13                        | 2093.01 | 107.852 | 63737  | 3 | 698.34  | -12.01 |
| P04350 TBB4_HUMAN Tubulin beta-4 chain  | 11 |                                                              | GSQQYRALTVPELTQQMFDAK                       | 276 | 21 | 3  | 21.91  | b6y13y14                                | 2411.20 | 103.552 | 2944   | 3 | 804.40  | -1.11  |
| P04350 TBB4_HUMAN Tubulin beta-4 chain  | 12 | Carbamidomethyl+C(27);Carbamidomethyl+C(37);Phosphoryl STY() | VSDTVVEPYNATLSVHQLVENTD<br>ETYCIDNEALYDICFR | 174 | 39 | 8  | 36.11  | b3b6b9°b9b10b11*b11y7                   | 4673.12 | 120.160 | 6959   | 4 | 1169.04 | 12.85  |
| P04350 TBB4_HUMAN Tubulin beta-4 chain  | 13 | Oxidation+M()                                                | ISEQFTAMFRR                                 | 380 | 11 | 4  | 35.39  | b3°b3b7b9                               | 1401.68 | 83.841  | 15760  | 2 | 701.35  | -7.75  |
| Q9NY65 TBA8_HUMAN Tubulin alpha-8 chain | 1  |                                                              | VGINYQPPTVPPGDLAK                           | 352 | 18 | 14 | 58.01  | b3b5*b5b6*b6b11°b11y1y2y3y7y8y12y18     | 1824.98 | 65.287  | 217298 | 2 | 913.00  | -0.33  |
| Q9NY65 TBA8_HUMAN Tubulin alpha-8 chain | 2  |                                                              | QLFHPEQLITGKEDAANNYAR                       | 84  | 21 | 16 | 83.17  | b2b4*b4b5b6*b6b10y3y5*y5y6y7*y7y9y12y21 | 2415.20 | 61.492  | 170806 | 3 | 805.74  | -0.51  |
| Q9NY65 TBA8_HUMAN Tubulin alpha-8 chain | 3  |                                                              | NLDIERPTYTLNR                               | 215 | 14 | 13 | 71.12  | b2*b2b3°b3y2y3y4*y4y6y7y8y12y14         | 1718.87 | 52.276  | 109813 | 3 | 573.63  | -9.73  |
| Q9NY65 TBA8_HUMAN Tubulin alpha-8 chain | 4  | Carbamidomethyl+C(3)                                         | AVCMLSNTTAAIEAWAR                           | 373 | 17 | 7  | 48.39  | b8b9y10y11°y11y13y15                    | 1864.91 | 83.499  | 94580  | 2 | 932.96  | 1.31   |
| Q9NY65 TBA8_HUMAN Tubulin alpha-8 chain | 5  |                                                              | LISQIVSSITASLR                              | 229 | 14 | 5  | 18.69  | b4y2y5y8y14                             | 1487.88 | 100.286 | 51813  | 2 | 744.44  | -2.13  |
| Q9NY65 TBA8_HUMAN Tubulin alpha-8 chain | 6  |                                                              | FDGALNVDLTFEQTNLVPYPR                       | 243 | 21 | 12 | 66.62  | b2°b2b3b4b5b12b13y2y4y5y12y21           | 2409.22 | 94.359  | 27498  | 2 | 1205.12 | 6.49   |
| Q9NY65 TBA8_HUMAN Tubulin alpha-8 chain | 7  |                                                              | ESIDLVLDR                                   | 112 | 9  | 5  | 45.32  | y2y3y5y8y9                              | 1059.56 | 62.938  | 8400   | 2 | 530.28  | -10.37 |
| Q9NY65 TBA8_HUMAN Tubulin alpha-8 chain | 8  |                                                              | AVMIDLEPTVVDEVR                             | 64  | 15 | 4  | 23.59  | b3b4y8°y8                               | 1685.85 | 54.986  | 5863   | 3 | 562.62  | -18.03 |
| Q9NY65 TBA8_HUMAN Tubulin alpha-8 chain | 9  |                                                              | EDAANNYARGHYTVGK                            | 96  | 16 | 4  | 23.15  | b13y11y12°y12                           | 1765.83 | 81.479  | 77866  | 2 | 883.42  | 2.35   |
| Q9NY65 TBA8_HUMAN Tubulin alpha-8 chain | 10 | Carbamidomethyl+C(15);Carbamidomethyl+C(25)                  | AYHEQLSVAEITSSCFEPNSQMVK<br>CDPR            | 280 | 28 | 5  | 25.65  | b12y5y6y11y13                           | 3283.47 | 80.656  | 7020   | 4 | 821.62  | -3.72  |

|                                              |    |                                             |                                          |     |    |    |        |                                                 |         |         |         |   |         |        |
|----------------------------------------------|----|---------------------------------------------|------------------------------------------|-----|----|----|--------|-------------------------------------------------|---------|---------|---------|---|---------|--------|
| Q9NY65 TBA8_HUMAN Tubulin alpha-8 chain      | 11 |                                             | INDDSFSTFFSETGNGKHVPR                    | 42  | 22 | 4  | 22.92  | b9b10*b10b12                                    | 2484.12 | 43.515  | 6638    | 4 | 621.78  | -11.01 |
| Q9NY65 TBA8_HUMAN Tubulin alpha-8 chain      | 12 | Carbamidomethyl+C(15);Phosphoryl STY(12)    | AYHEQLSVAEITSSCFEPNSQMVK                 | 280 | 24 | 3  | 22.66  | y4y12y13                                        | 2835.24 | 70.045  | 4068    | 3 | 945.75  | 3.19   |
| Q9NY65 TBA8_HUMAN Tubulin alpha-8 chain      | 13 | Oxidation+M(3)                              | AVMIDLEPTVVDEVR                          | 64  | 15 | 4  | 24.95  | b7b9y9y13                                       | 1701.88 | 76.289  | 6616    | 2 | 851.44  | 5.09   |
| Q9NY65 TBA8_HUMAN Tubulin alpha-8 chain      | 14 |                                             | DIERPTYTNLNR                             | 217 | 12 | 3  | 26.47  | b3b4b7                                          | 1491.74 | 52.235  | 8659    | 2 | 746.37  | -9.90  |
| Q9NY65 TBA8_HUMAN Tubulin alpha-8 chain      | 15 |                                             | PGGDIAK                                  | 363 | 7  | 2  | 13.28  | b4b6                                            | 657.35  | 65.294  | 2700    | 2 | 329.18  | -7.52  |
| P68371 TBB2C_HUMAN Tubulin beta-2C chain     | 1  |                                             | LAVNMVVFPR                               | 252 | 10 | 10 | 85.76  | b2b5*b5y4y5y6y7y8y9y10                          | 1143.63 | 72.182  | 134998  | 2 | 572.32  | -5.34  |
| P68371 TBB2C_HUMAN Tubulin beta-2C chain     | 2  |                                             | SGPFGQIFRPDNFVFGQSGAGNN WAK              | 77  | 26 | 10 | 30.87  | b2b13b14*b14y1y2y6y12y18y26                     | 2798.35 | 89.252  | 124179  | 3 | 933.46  | 3.75   |
| P68371 TBB2C_HUMAN Tubulin beta-2C chain     | 3  |                                             | IMNTFSVVPSPK                             | 162 | 12 | 4  | 25.61  | b4y1y7y8                                        | 1319.71 | 63.200  | 97959   | 2 | 660.36  | 6.94   |
| P68371 TBB2C_HUMAN Tubulin beta-2C chain     | 4  | Carbamidomethyl+C(23)                       | LTTPTYGDLNHLVSATMSGVTTC LR               | 216 | 25 | 14 | 116.96 | y2y3y4y5y6y7y8y9y10y12y13y14y22y25              | 2708.33 | 95.085  | 80004   | 3 | 903.45  | -1.35  |
| P68371 TBB2C_HUMAN Tubulin beta-2C chain     | 5  | Carbamidomethyl+C(27);Carbamidomethyl+C(37) | VSDTVVEPYNATLSVHQLVENTD ETYCIDNEALYDICFR | 174 | 39 | 10 | 23.76  | b6b8b12*b12*b12b13y1y7y9*y9                     | 4593.04 | 89.055  | 41967   | 6 | 766.35  | -14.56 |
| P68371 TBB2C_HUMAN Tubulin beta-2C chain     | 6  | Carbamidomethyl+C(5);Carbamidomethyl+C(7)   | EAESCDCLQGFQLTHSLGGGTGS GMGTLLISK        | 122 | 32 | 4  | 16.83  | y3y7y15y32                                      | 3311.56 | 81.243  | 41273   | 3 | 1104.52 | 6.64   |
| P68371 TBB2C_HUMAN Tubulin beta-2C chain     | 7  |                                             | IREEYPDR                                 | 154 | 8  | 8  | 48.29  | b2b3b4b7*b7y1y4y8                               | 1077.53 | 24.134  | 32991   | 2 | 539.27  | 1.02   |
| P68371 TBB2C_HUMAN Tubulin beta-2C chain     | 8  |                                             | ISEQFTAMFRR                              | 380 | 11 | 6  | 23.63  | b1b5b10*b10y8y11                                | 1385.70 | 71.875  | 2533    | 3 | 462.57  | -0.79  |
| P68371 TBB2C_HUMAN Tubulin beta-2C chain     | 9  | Carbamidomethyl+C(10)                       | EIVHLQAGQCGNQIGAK                        | 2   | 17 | 7  | 22.13  | b3b9*b9y8*y8y11*y11                             | 1822.94 | 43.658  | 4862    | 2 | 911.97  | 6.90   |
| P68371 TBB2C_HUMAN Tubulin beta-2C chain     | 10 |                                             | GLKMSATFIGNSTAQELFK                      | 359 | 20 | 3  | 23.35  | b8b9b14                                         | 2156.14 | 136.476 | 16202   | 3 | 719.38  | -2.26  |
| P68371 TBB2C_HUMAN Tubulin beta-2C chain     | 11 | Carbamidomethyl+C(23);Oxidation+M()         | LTTPTYGDLNHLVSATMSGVTTC LR               | 216 | 25 | 3  | 12.09  | b9b13y9                                         | 2724.34 | 90.727  | 2670    | 3 | 908.79  | 3.50   |
| P69891 HBG1_HUMAN Hemoglobin subunit gamma-1 | 1  |                                             | LLVVYPWTQR                               | 31  | 10 | 20 | 126.8  | b2b3b4b5y1y2*y2y3*y3y4*y4y5*y5y6*y6y7*y7y8y9y10 | 1274.72 | 78.095  | 1440083 | 2 | 637.87  | -0.77  |
| P69891 HBG1_HUMAN Hemoglobin subunit gamma-1 | 2  |                                             | VNVEDAGGETLGR                            | 18  | 13 | 8  | 33.17  | b11b13*b13y7y9y11*y11y13                        | 1316.65 | 58.411  | 14364   | 2 | 658.83  | 2.23   |
| P69891 HBG1_HUMAN Hemoglobin subunit gamma-1 | 3  |                                             | FFDSFGNLSSASAIMGNPK                      | 41  | 19 | 4  | 19.95  | b10b13y8y14                                     | 1989.94 | 82.145  | 8801    | 3 | 663.98  | -0.31  |
| P69891 HBG1_HUMAN Hemoglobin subunit gamma-1 | 4  |                                             | MGHFTEEDKATITSLWGK                       | 0   | 18 | 4  | 31.8   | b3b5b6b13                                       | 2050.98 | 121.118 | 47038   | 2 | 1025.99 | -5.12  |
| P69891 HBG1_HUMAN Hemoglobin subunit gamma-1 | 5  |                                             | MVTAVASALSSRYH                           | 133 | 14 | 3  | 18.69  | b6y3y7                                          | 1492.77 | 65.364  | 7482    | 3 | 498.26  | 6.13   |
| P69891 HBG1_HUMAN Hemoglobin subunit gamma-1 | 6  |                                             | GHFTEEDKATITSLWGK                        | 1   | 17 | 3  | 22.78  | b3b4y3                                          | 1919.93 | 38.867  | 5516    | 4 | 480.74  | -7.88  |
| P69891 HBG1_HUMAN Hemoglobin subunit gamma-1 | 7  |                                             | EFTPEVQASWQKMVTAVASALSS R                | 121 | 24 | 4  | 27.34  | b6b8b11b13                                      | 2623.28 | 100.716 | 1960    | 3 | 875.10  | -14.61 |
| P69891 HBG1_HUMAN Hemoglobin subunit gamma-1 | 8  |                                             | ATITSLWGKVNVEDAGGETLGR                   | 9   | 22 | 3  | 19.56  | y8y10y12                                        | 2274.17 | 89.074  | 1641    | 3 | 758.73  | -0.86  |
| P69892 HBG2_HUMAN Hemoglobin subunit gamma-2 | 1  |                                             | LLVVYPWTQR                               | 31  | 10 | 20 | 126.8  | b2b3b4b5y1y2*y2y3*y3y4*y4y5*y5y6*y6y7*y7y8y9y10 | 1274.72 | 78.095  | 1440083 | 2 | 637.87  | -0.77  |

|                                               |    |                       |                                     |     |    |    |        |                                        |         |         |        |   |         |        |
|-----------------------------------------------|----|-----------------------|-------------------------------------|-----|----|----|--------|----------------------------------------|---------|---------|--------|---|---------|--------|
| IP69892 HBG2_HUMAN Hemoglobin subunit gamma-2 | 2  |                       | VNVEDAGGETLGR                       | 18  | 13 | 8  | 33.17  | b11b13*b13y7y9y11*y11y13               | 1316.65 | 58.411  | 14364  | 2 | 658.83  | 2.23   |
| IP69892 HBG2_HUMAN Hemoglobin subunit gamma-2 | 3  | Carbamidomethyl+C(11) | GTFAQLSELHCDK                       | 83  | 13 | 12 | 85.98  | b3b4*b4b6b10*b10b11*b11b12*b12y7y11    | 1505.71 | 54.865  | 6826   | 2 | 753.36  | 4.95   |
| IP69892 HBG2_HUMAN Hemoglobin subunit gamma-2 | 4  |                       | EFTPEVQASWQK                        | 121 | 12 | 6  | 39.34  | b3b4*b4b5*b5y10                        | 1449.70 | 86.403  | 2950   | 2 | 725.36  | 1.85   |
| IP00924 ENO1_YEAST Enolase 1                  | 1  |                       | NVNDVIAPAFVK                        | 67  | 12 | 11 | 75.83  | b1b2b4b5b6y1y5y6y8y10y12               | 1286.70 | 65.185  | 158554 | 2 | 643.86  | -4.36  |
| IP00924 ENO1_YEAST Enolase 1                  | 2  |                       | AADALLK                             | 338 | 8  | 11 | 104.83 | b1b2b3b5b6y3y4y5y6y7y8                 | 814.49  | 52.174  | 113905 | 2 | 407.75  | -14.76 |
| IP00924 ENO1_YEAST Enolase 1                  | 3  |                       | IGSEVYHNLK                          | 185 | 10 | 10 | 82.82  | b2y2y3y4*y4y5y7y8y9y10                 | 1159.61 | 36.498  | 106671 | 2 | 580.31  | -0.11  |
| IP00924 ENO1_YEAST Enolase 1                  | 4  |                       | SIVPSGASTGVHEALEMR                  | 32  | 18 | 14 | 94.27  | b1b7b13y2y5y6*y6y9*y9y11y13y14y15y16   | 1840.91 | 60.380  | 102714 | 3 | 614.31  | -6.56  |
| IP00924 ENO1_YEAST Enolase 1                  | 5  |                       | VNQGTLSESIK                         | 346 | 12 | 9  | 81.06  | b2b3b4y3y5y8y9y10y12                   | 1288.70 | 53.605  | 102454 | 2 | 644.86  | -5.30  |
| IP00924 ENO1_YEAST Enolase 1                  | 6  |                       | IEEELGDNAVFAGENFHGGDK               | 415 | 21 | 7  | 42.54  | b3b6b10y6y8y11y12                      | 2328.04 | 56.788  | 41550  | 4 | 582.77  | -5.35  |
| IP00924 ENO1_YEAST Enolase 1                  | 7  |                       | IATAIEK                             | 330 | 7  | 5  | 52.63  | y3y4y5y6y7                             | 745.44  | 26.846  | 16854  | 2 | 373.22  | -11.54 |
| IP00924 ENO1_YEAST Enolase 1                  | 8  |                       | SIVPSGASTGVHEALEMRDGDK              | 32  | 22 | 6  | 37.12  | b6y3y8y9y10y22                         | 2256.13 | 105.337 | 2982   | 2 | 1128.57 | 14.61  |
| IP00924 ENO1_YEAST Enolase 1                  | 9  |                       | AAQDSFAAGWGVMSHR                    | 358 | 17 | 6  | 39.92  | b6*b6b15b16y8y9                        | 1789.82 | 104.561 | 286345 | 2 | 895.42  | -11.59 |
| IP00924 ENO1_YEAST Enolase 1                  | 10 |                       | LNQLLR                              | 409 | 6  | 3  | 39.26  | b3y4y5                                 | 756.46  | 41.052  | 36710  | 2 | 378.73  | -13.55 |
| IP00924 ENO1_YEAST Enolase 1                  | 11 |                       | GNPTVEVELTTEK                       | 15  | 13 | 8  | 41.92  | b3*b3b11*b11y3y6*y6y12                 | 1416.71 | 82.112  | 29969  | 2 | 708.86  | -4.83  |
| IP00924 ENO1_YEAST Enolase 1                  | 12 | Carbamidomethyl+C(5)  | IGLDCASSEFFK                        | 243 | 12 | 5  | 35.24  | b5b7y6*y6y7                            | 1373.66 | 90.740  | 22627  | 2 | 687.33  | 12.09  |
| IP00924 ENO1_YEAST Enolase 1                  | 13 |                       | AVDDFLISLDGTANK                     | 88  | 15 | 5  | 37.04  | b5y6*y6y7y8                            | 1578.80 | 81.479  | 8760   | 2 | 789.90  | -0.39  |
| IP00924 ENO1_YEAST Enolase 1                  | 14 |                       | RYGASAGNVGDEGGVAPNIQTAE EALDLIVDAIK | 200 | 34 | 8  | 38.8   | b6b8*b8*b8b10b11*b11b12                | 3413.75 | 126.237 | 64199  | 3 | 1138.59 | 8.65   |
| IP00924 ENO1_YEAST Enolase 1                  | 15 |                       | GNPTVEVELTTEKGVFR                   | 15  | 17 | 6  | 24.45  | b3*b3b5b6*b6*b6                        | 1875.97 | 43.442  | 15247  | 3 | 626.00  | -4.23  |
| IP00924 ENO1_YEAST Enolase 1                  | 16 | Phosphoryl STY(8)     | AVDDFLISLDGTANK                     | 88  | 15 | 7  | 61.18  | b3b5b6b7y10y13y14                      | 1658.78 | 70.026  | 21462  | 3 | 553.60  | 12.58  |
| IP00924 ENO1_YEAST Enolase 1                  | 17 | Phosphoryl STY()      | VNQGTLSESIK                         | 346 | 12 | 7  | 59.94  | b4b5*b5b9b10b11*b11                    | 1368.66 | 37.468  | 5293   | 2 | 684.83  | -6.33  |
| IP00924 ENO1_YEAST Enolase 1                  | 18 | Phosphoryl STY(10)    | GNPTVEVELTTEK                       | 15  | 13 | 7  | 33.17  | b6*b6*b6b8b10_H3PO4 b10*b10y8          | 1496.66 | 52.236  | 2111   | 2 | 748.83  | -11.17 |
| IP00924 ENO1_YEAST Enolase 1                  | 19 | Oxidation+M(17)       | SIVPSGASTGVHEALEMRDGDK              | 32  | 22 | 3  | 22.92  | b9b10b14                               | 2272.09 | 65.521  | 604007 | 3 | 758.03  | -0.21  |
| IP00924 ENO1_YEAST Enolase 1                  | 20 | Oxidation+M(13)       | AAQDSFAAGWGVMSHR                    | 358 | 17 | 6  | 38.08  | b4y3y6*y6y8y10                         | 1805.86 | 57.731  | 5565   | 2 | 903.43  | 12.17  |
| IP00924 ENO1_YEAST Enolase 1                  | 21 |                       | GSEVYHNLK                           | 186 | 9  | 1  | 8.1    | b4                                     | 1046.52 | 36.483  | 48070  | 2 | 523.77  | -1.98  |
| IP00924 ENO1_YEAST Enolase 1                  | 22 |                       | ADALLK                              | 339 | 7  | 3  | 24.17  | b4*b4b5                                | 743.46  | 52.170  | 10252  | 1 | 743.46  | -2.55  |
| IP00924 ENO1_YEAST Enolase 1                  | 23 |                       | PSGASTGVHEALEMR                     | 35  | 15 | 1  | 7.4    | b13                                    | 1541.75 | 60.388  | 9449   | 2 | 771.38  | 9.50   |
| IP00924 ENO1_YEAST Enolase 1                  | 24 |                       | SEVYHNLK                            | 187 | 8  | 0  | 2.15   |                                        | 989.50  | 36.488  | 4705   | 2 | 495.25  | -4.81  |
| IP00924 ENO1_YEAST Enolase 1                  | 25 |                       | IGSEVYHNLK                          | 185 | 10 | 0  | 2.15   |                                        | 1141.58 | 36.484  | 1630   | 3 | 381.20  | -10.69 |
| IP31146 COR1A_HUMAN Coronin-1A                | 1  |                       | AAPEASGTPSSDAVSR                    | 416 | 16 | 14 | 103.82 | b2b5b11y5y7y8*y8y10y11y12*y12y13y14y16 | 1502.71 | 27.210  | 30510  | 2 | 751.86  | 1.46   |
| IP31146 COR1A_HUMAN Coronin-1A                | 2  | Carbamidomethyl+C(32) | HLEEPLSLQELDTSSGVLLPFFDPD TNIVYLCGK | 253 | 34 | 7  | 61.51  | b3*b3b4b5y3y4y5                        | 3846.94 | 111.237 | 7591   | 3 | 1282.99 | 7.17   |
| IP31146 COR1A_HUMAN Coronin-1A                | 3  |                       | YFEITSEAPFLHYLSMFSSK                | 293 | 20 | 10 | 67.37  | b3b7b19y3y4y7*y7y9y12y13               | 2397.14 | 107.789 | 20476  | 3 | 799.72  | -3.77  |
| IP31146 COR1A_HUMAN Coronin-1A                | 4  |                       | AVFVSE GK                           | 225 | 8  | 4  | 32.34  | b5y5*y5y6                              | 836.44  | 32.523  | 15831  | 2 | 418.72  | -14.16 |
| IP31146 COR1A_HUMAN Coronin-1A                | 5  |                       | SDLFQEDLYPPTAGDPALTAEEW LGGR        | 355 | 28 | 3  | 11.47  | b9b23y3                                | 3045.51 | 61.430  | 10910  | 4 | 762.13  | 21.48  |

|                                                      |    |                       |                                                  |     |    |    |       |                                                   |         |         |        |   |         |        |
|------------------------------------------------------|----|-----------------------|--------------------------------------------------|-----|----|----|-------|---------------------------------------------------|---------|---------|--------|---|---------|--------|
| P31146 COR1A_HUMAN Coronin-1A                        | 6  | Carbamidomethyl+C(4)  | ADQCYEDVR                                        | 20  | 9  | 5  | 44.46 | b3*b3y4y6y7                                       | 1155.47 | 28.564  | 10354  | 2 | 578.24  | -4.75  |
| P31146 COR1A_HUMAN Coronin-1A                        | 7  |                       | AVFVSEGGKILTTGFSR                                | 225 | 16 | 4  | 23.15 | b6b7*b7y5                                         | 1711.92 | 90.768  | 66053  | 2 | 856.46  | -11.55 |
| P31146 COR1A_HUMAN Coronin-1A                        | 8  |                       | KSDLFQEDLYPPTAGPDPALTAEE<br>WLGGR                | 354 | 29 | 9  | 52.6  | b10b11*b11y3y4y7y9y1<br>2y14                      | 3173.54 | 94.914  | 37694  | 3 | 1058.52 | -1.38  |
| P31146 COR1A_HUMAN Coronin-1A                        | 9  |                       | AAPEASGTPSSDAVSRLEEEMR                           | 416 | 22 | 8  | 51.31 | b4b7b10*b10b11b14y7y<br>8                         | 2290.07 | 36.872  | 5575   | 3 | 764.03  | 1.60   |
| P31146 COR1A_HUMAN Coronin-1A                        | 10 |                       | DGYVPPKSR                                        | 393 | 9  | 3  | 29.76 | b3b6y5                                            | 1018.54 | 28.602  | 4995   | 2 | 509.77  | 8.93   |
| P31146 COR1A_HUMAN Coronin-1A                        | 11 | Phosphoryl STY(4)     | LQATVQELQKR                                      | 439 | 11 | 3  | 23.63 | b3b9y9                                            | 1393.69 | 41.638  | 6023   | 3 | 465.24  | -12.44 |
| P31146 COR1A_HUMAN Coronin-1A                        | 12 | Phosphoryl STY(10)    | EPVVTLEGHTKR                                     | 121 | 12 | 4  | 31.84 | b3b8*b8b10                                        | 1445.71 | 136.392 | 3229   | 1 | 1445.71 | 6.08   |
| Q6PEY2 TBA3E_HUMAN Tubulin alpha-<br>3E chain        | 1  |                       | VGINYQPPTVVPGGDLAK                               | 352 | 18 | 14 | 58.01 | b3b5*b5b6*b6b11*b11y<br>1y2y3y7y8y12y18           | 1824.98 | 65.287  | 217298 | 2 | 913.00  | -0.33  |
| Q6PEY2 TBA3E_HUMAN Tubulin alpha-<br>3E chain        | 2  |                       | NLDIERPTYTNLNR                                   | 215 | 14 | 13 | 71.12 | b2*b2b3*b3y2y3y4*y4y<br>6y7y8y12y14               | 1718.87 | 52.276  | 109813 | 3 | 573.63  | -9.73  |
| Q6PEY2 TBA3E_HUMAN Tubulin alpha-<br>3E chain        | 3  | Carbamidomethyl+C(3)  | AVCMLSNTTAAIEAWAR                                | 373 | 17 | 7  | 48.39 | b8b9y10y11*y11y13y15                              | 1864.91 | 83.499  | 94580  | 2 | 932.96  | 1.31   |
| Q6PEY2 TBA3E_HUMAN Tubulin alpha-<br>3E chain        | 4  | Carbamidomethyl+C(15) | AYHEQLSVAEITNACFEPANQMV<br>K                     | 280 | 24 | 9  | 53.84 | b10b14y4y9y11y12y13°<br>y13y17                    | 2750.30 | 72.865  | 53972  | 3 | 917.44  | 3.99   |
| Q6PEY2 TBA3E_HUMAN Tubulin alpha-<br>3E chain        | 5  |                       | FDGALNVDLTFEQTNLVPYPR                            | 243 | 21 | 12 | 66.62 | b2°b2b3b4b5b12b13y2y<br>4y5y12y21                 | 2409.22 | 94.359  | 27498  | 2 | 1205.12 | 6.49   |
| Q6PEY2 TBA3E_HUMAN Tubulin alpha-<br>3E chain        | 6  |                       | GHYTIGK                                          | 105 | 7  | 5  | 39.69 | b4°b4b6y6y7                                       | 775.41  | 26.580  | 7470   | 2 | 388.21  | 5.67   |
| Q6PEY2 TBA3E_HUMAN Tubulin alpha-<br>3E chain        | 7  | Carbamidomethyl+C(5)  | LADLCTGLQGFLIFHSFGGGTGS<br>FASLLMERLSVDYSK       | 124 | 39 | 6  | 11.95 | b3b10°b10y7°y7y9                                  | 4152.03 | 107.922 | 4981   | 4 | 1038.76 | -7.17  |
| P00488 F13A_HUMAN Coagulation factor<br>XIII A chain | 1  |                       | GTYPVPIVSELQSGK                                  | 114 | 16 | 10 | 68.24 | b3°b3b4b6y3y7y8y10y1<br>2y16                      | 1687.93 | 83.690  | 121253 | 2 | 844.47  | 3.69   |
| P00488 F13A_HUMAN Coagulation factor<br>XIII A chain | 2  |                       | LIASMSSDSL                                       | 705 | 11 | 10 | 72.45 | b2b9y3y6°y6y7°y8y9y1<br>0y11                      | 1179.60 | 49.850  | 74665  | 2 | 590.31  | -0.41  |
| P00488 F13A_HUMAN Coagulation factor<br>XIII A chain | 3  |                       | AVPPNNSNAEEDDLPTVELQGVV<br>PR                    | 13  | 25 | 8  | 44.59 | b3b6b14°b14y3y4y5y25                              | 2602.31 | 74.554  | 66905  | 3 | 868.11  | -0.94  |
| P00488 F13A_HUMAN Coagulation factor<br>XIII A chain | 4  |                       | STVLTIPEIIK                                      | 624 | 12 | 10 | 64.43 | b2°b2b4°b4y4y6y7y8y9<br>y12                       | 1326.82 | 88.385  | 65535  | 2 | 663.92  | -1.01  |
| P00488 F13A_HUMAN Coagulation factor<br>XIII A chain | 5  |                       | AQMDLSGR                                         | 245 | 8  | 12 | 64.24 | b1b2*b2b4°b4*b4y3°y3<br>y4y6y7y8                  | 877.42  | 30.189  | 55682  | 2 | 439.21  | -0.35  |
| P00488 F13A_HUMAN Coagulation factor<br>XIII A chain | 6  |                       | LSIQSSPK                                         | 144 | 8  | 4  | 40.12 | y5y6y7y8                                          | 859.48  | 30.575  | 48277  | 2 | 430.25  | -6.25  |
| P00488 F13A_HUMAN Coagulation factor<br>XIII A chain | 7  |                       | KPLNTEGVMK                                       | 504 | 10 | 5  | 36.21 | y7y8°y8y9*y9                                      | 1116.61 | 31.471  | 33105  | 2 | 558.81  | -1.53  |
| P00488 F13A_HUMAN Coagulation factor<br>XIII A chain | 8  |                       | DGTHVVENVDATHIGK                                 | 447 | 16 | 4  | 16.61 | b8y3y6y16                                         | 1691.82 | 39.766  | 31518  | 3 | 564.61  | -6.06  |
| P00488 F13A_HUMAN Coagulation factor<br>XIII A chain | 9  |                       | EAVLIQAGEYMGQLLEQASLHFF<br>VTAR                  | 585 | 27 | 14 | 67.88 | b3b5b6b10°b10b12b13°<br>b13b14b16°b16y7y16y2<br>7 | 3021.55 | 136.669 | 29385  | 3 | 1007.86 | 0.40   |
| P00488 F13A_HUMAN Coagulation factor<br>XIII A chain | 10 |                       | FQEQQEER                                         | 483 | 9  | 8  | 44.46 | b1b3y1y5°y5y6y7y9                                 | 1151.50 | 20.060  | 27151  | 2 | 576.25  | 4.24   |
| P00488 F13A_HUMAN Coagulation factor<br>XIII A chain | 11 | Carbamidomethyl+C(8)  | DSVWNYHCWNEAWMTRPDLPV<br>GFGGWQAVDSTPQENS DGM YR | 367 | 42 | 8  | 22.41 | b19y1y2y4y10*y10y13y<br>14                        | 4959.16 | 96.829  | 19686  | 4 | 1240.55 | 4.73   |
| P00488 F13A_HUMAN Coagulation factor<br>XIII A chain | 12 |                       | VGSAMVNAK                                        | 261 | 9  | 6  | 37.54 | b2y2y4y7y8y9                                      | 876.46  | 24.721  | 19545  | 2 | 438.73  | -5.78  |
| P00488 F13A_HUMAN Coagulation factor<br>XIII A chain | 13 |                       | HVYGELDVQIQR                                     | 716 | 12 | 3  | 34.85 | b6b7b8                                            | 1456.74 | 54.943  | 15433  | 2 | 728.88  | -6.96  |
| P00488 F13A_HUMAN Coagulation factor<br>XIII A chain | 14 |                       | QIGGDGMMDITDTYK                                  | 468 | 15 | 4  | 30.97 | b9b10y5y8                                         | 1644.70 | 29.171  | 13481  | 2 | 822.85  | -16.55 |

|                                                   |    |                       |                            |      |    |    |        |                                                                     |         |         |        |   |         |        |
|---------------------------------------------------|----|-----------------------|----------------------------|------|----|----|--------|---------------------------------------------------------------------|---------|---------|--------|---|---------|--------|
| P00488 F13A_HUMAN Coagulation factor XIII A chain | 15 |                       | SNVDMDFEVENAVL GK          | 516  | 16 | 5  | 23.15  | b4y12*y12y13*y13                                                    | 1766.81 | 68.916  | 10584  | 2 | 883.91  | -10.16 |
| P00488 F13A_HUMAN Coagulation factor XIII A chain | 16 |                       | MYVAVWTPYGVLR              | 159  | 13 | 4  | 27.5   | b4b8b9*b9                                                           | 1554.81 | 65.421  | 10101  | 3 | 518.94  | -2.04  |
| P00488 F13A_HUMAN Coagulation factor XIII A chain | 17 |                       | GQSFYVQIDFSRPYDPR          | 79   | 17 | 4  | 15.8   | b10b12*b12y11                                                       | 2075.03 | 76.374  | 7781   | 2 | 1038.02 | 15.53  |
| P00488 F13A_HUMAN Coagulation factor XIII A chain | 18 | Carbamidomethyl+C(14) | NPETDTYILFNPWCEDDAVYLDN EK | 175  | 25 | 6  | 27.21  | b3b11*b11b12b16y14                                                  | 3061.33 | 63.612  | 6589   | 4 | 766.09  | -2.39  |
| P00488 F13A_HUMAN Coagulation factor XIII A chain | 19 |                       | NVWVHLDGPGVTRPMK           | 662  | 16 | 4  | 24.32  | b3b10b13*b13                                                        | 1805.91 | 91.317  | 6094   | 2 | 903.46  | -21.29 |
| P00488 F13A_HUMAN Coagulation factor XIII A chain | 20 |                       | EEYVLNDIGVIFYGEVNDIK       | 202  | 20 | 9  | 57.05  | b3b4*b4b5*b5b6b8y3y10                                               | 2329.17 | 106.038 | 3005   | 2 | 1165.09 | 4.72   |
| P00488 F13A_HUMAN Coagulation factor XIII A chain | 21 | Carbamidomethyl+C(15) | SWSYGFEDGILDTCLYVMDR       | 224  | 21 | 3  | 21.91  | b12b13y11                                                           | 2555.14 | 74.623  | 2413   | 2 | 1278.07 | 6.69   |
| P00488 F13A_HUMAN Coagulation factor XIII A chain | 22 | Carbamidomethyl+C(1)  | CGPASVQAIK                 | 409  | 10 | 3  | 27.97  | b3y8y9                                                              | 1030.54 | 34.367  | 1698   | 1 | 1030.54 | 2.61   |
| P00488 F13A_HUMAN Coagulation factor XIII A chain | 23 |                       | RQSFYVQIDFSRPYDPR          | 78   | 18 | 3  | 15.09  | b4y4y9                                                              | 2231.10 | 93.437  | 44771  | 2 | 1116.05 | -0.55  |
| P00488 F13A_HUMAN Coagulation factor XIII A chain | 24 |                       | LIASMSDSL RHVY GELDVQIQR   | 705  | 23 | 4  | 19.48  | b5b10b14y21                                                         | 2617.33 | 103.135 | 21142  | 3 | 873.12  | -3.45  |
| P00488 F13A_HUMAN Coagulation factor XIII A chain | 25 |                       | QIGDGMMDITDTYKFEQGEER      | 468  | 24 | 4  | 12.37  | b6y4*y4y11                                                          | 2777.20 | 67.711  | 11624  | 3 | 926.41  | 0.44   |
| P00488 F13A_HUMAN Coagulation factor XIII A chain | 26 |                       | GNPIKVSR                   | 253  | 8  | 4  | 53.06  | y3y4y5y6                                                            | 870.51  | 23.692  | 10144  | 2 | 435.76  | -5.33  |
| P00488 F13A_HUMAN Coagulation factor XIII A chain | 27 |                       | GQSFYVQIDFSRPYDPRR         | 79   | 18 | 4  | 24.01  | b4b10b11*b11                                                        | 2231.07 | 70.091  | 7137   | 3 | 744.36  | -11.93 |
| P00488 F13A_HUMAN Coagulation factor XIII A chain | 28 |                       | RAVPPNNSNAEDDLPTVELQGV VPR | 12   | 26 | 3  | 18     | b3b13b15                                                            | 2758.42 | 70.100  | 5167   | 3 | 920.15  | 4.69   |
| P00488 F13A_HUMAN Coagulation factor XIII A chain | 29 |                       | MSETSR TAFGGR              | 0    | 12 | 6  | 36.33  | b6b8b11*b11y11*y11                                                  | 1299.61 | 39.395  | 3797   | 2 | 650.31  | -0.38  |
| P00488 F13A_HUMAN Coagulation factor XIII A chain | 30 |                       | VDHHTDKYENNK               | 62   | 12 | 3  | 21.63  | b3b5y4                                                              | 1499.67 | 12.602  | 3205   | 3 | 500.56  | -10.58 |
| P00488 F13A_HUMAN Coagulation factor XIII A chain | 31 |                       | EREYVLNDIGVIFYGEVNDIK      | 200  | 22 | 4  | 26.25  | b12b16y16y17                                                        | 2614.33 | 136.841 | 2581   | 2 | 1307.67 | 8.78   |
| P00488 F13A_HUMAN Coagulation factor XIII A chain | 32 | Phosphoryl STY(11)    | GQSFYVQIDFSRPYDPRR         | 79   | 18 | 7  | 31.7   | b10*b10b13y8y9*y9y12                                                | 2311.06 | 82.169  | 3359   | 2 | 1156.04 | 2.96   |
| P00488 F13A_HUMAN Coagulation factor XIII A chain | 33 | Phosphoryl STY(5)     | GQSFYVQIDFSRPYDPR          | 79   | 17 | 4  | 23.2   | y3y11*y11y13_H3PO4y13                                               | 2154.98 | 107.934 | 1755   | 2 | 1077.99 | 10.42  |
| P00488 F13A_HUMAN Coagulation factor XIII A chain | 34 | Oxidation+M(16)       | HVY GELDVQIQRRPSM          | 716  | 16 | 4  | 26.85  | b4b6b10y11                                                          | 1943.99 | 47.609  | 10404  | 2 | 972.50  | 7.28   |
| P00488 F13A_HUMAN Coagulation factor XIII A chain | 35 |                       | SIQSSPK                    | 145  | 7  | 1  | 9.46   | b3                                                                  | 746.40  | 30.565  | 1873   | 1 | 746.40  | -1.88  |
| P00488 F13A_HUMAN Coagulation factor XIII A chain | 36 |                       | VGSAMVNAK                  | 261  | 9  | 0  | 1.72   |                                                                     | 858.44  | 24.706  | 2939   | 2 | 429.72  | -10.81 |
| P35749 MYH11_HUMAN Myosin-11                      | 1  |                       | QLLQANPILEAFGNAK           | 216  | 16 | 26 | 154.41 | b2*b2b3*b3b4*b4b6*b6b16y1y2y4*y4y5y6y7*y7*y7y8*y8y10y11y12y13y14y16 | 1726.95 | 90.793  | 175864 | 2 | 863.98  | 0.92   |
| P35749 MYH11_HUMAN Myosin-11                      | 2  |                       | TQLEELEDELQATEDAK          | 1545 | 17 | 7  | 52.39  | y2y4y5y6y13y14y17                                                   | 1961.93 | 78.396  | 85898  | 2 | 981.47  | 4.79   |
| P35749 MYH11_HUMAN Myosin-11                      | 3  |                       | KEEELQAALAR                | 1087 | 11 | 6  | 65.53  | b6y3y5y7y10y11                                                      | 1257.68 | 42.097  | 79629  | 2 | 629.34  | 1.26   |
| P35749 MYH11_HUMAN Myosin-11                      | 4  |                       | NTDQASMPDNTAAQK            | 365  | 15 | 8  | 38.8   | b3y4y8*y8y10*y10y11y15                                              | 1591.71 | 25.889  | 41438  | 2 | 796.36  | 2.68   |
| P35749 MYH11_HUMAN Myosin-11                      | 5  | Carbamidomethyl+C(1)  | CNGVLEGIR                  | 700  | 9  | 6  | 53.49  | b2*b2y3y4y5y7                                                       | 1017.51 | 48.410  | 37209  | 2 | 509.26  | -3.60  |
| P35749 MYH11_HUMAN Myosin-11                      | 6  |                       | ALEEALAKEELER              | 1490 | 14 | 8  | 66.99  | b5b7y3y5*y5y8y11y12                                                 | 1629.85 | 97.853  | 12893  | 2 | 815.43  | 11.38  |

|                              |    |                       |                         |      |    |    |       |                                      |         |         |        |   |         |        |
|------------------------------|----|-----------------------|-------------------------|------|----|----|-------|--------------------------------------|---------|---------|--------|---|---------|--------|
| P35749 MYH11_HUMAN Myosin-11 | 7  |                       | FQKEIENLTQQYEEK         | 1396 | 15 | 6  | 28.59 | b6°b6y3y9*y9y10                      | 1926.96 | 109.556 | 5915   | 2 | 963.98  | 8.68   |
| P35749 MYH11_HUMAN Myosin-11 | 8  |                       | QLHEYETELEDERK          | 1596 | 14 | 6  | 29.87 | b2°b2b8y4y5y7                        | 1818.85 | 56.420  | 5465   | 2 | 909.93  | -1.75  |
| P35749 MYH11_HUMAN Myosin-11 | 9  |                       | LQNEVESVTGMLNEAEGK      | 1284 | 18 | 6  | 15.09 | b2°b2b6°b6y8y11                      | 1947.93 | 101.760 | 4152   | 3 | 649.98  | -3.32  |
| P35749 MYH11_HUMAN Myosin-11 | 10 |                       | SLEADLMQLQEDLAAAER      | 1683 | 18 | 5  | 20.97 | b7b14*b14y7y10                       | 2002.99 | 87.165  | 3955   | 2 | 1002.00 | 9.63   |
| P35749 MYH11_HUMAN Myosin-11 | 11 |                       | NLLQEQLQAETELYAEAEEMR   | 889  | 21 | 4  | 21    | b12y3y6y14                           | 2508.17 | 92.013  | 3788   | 2 | 1254.59 | -9.73  |
| P35749 MYH11_HUMAN Myosin-11 | 12 | Carbamidomethyl+C(13) | SMLQDREDQSILCTGESGAGK   | 163  | 21 | 5  | 43.4  | y4y7y10y11y12                        | 2282.05 | 75.365  | 3713   | 4 | 571.27  | 6.85   |
| P35749 MYH11_HUMAN Myosin-11 | 13 |                       | HISTLNIQLSDSKK          | 1364 | 14 | 6  | 18.69 | b2b5°b5y4°y4y6                       | 1583.87 | 116.081 | 3486   | 2 | 792.44  | -6.09  |
| P35749 MYH11_HUMAN Myosin-11 | 14 |                       | SHEAQVQEMR              | 1188 | 10 | 5  | 27.97 | b9y3y4y9*y10                         | 1214.55 | 30.975  | 3263   | 3 | 405.52  | -8.54  |
| P35749 MYH11_HUMAN Myosin-11 | 15 |                       | ALELDPNLYR              | 752  | 10 | 4  | 26.21 | b9y3y8°y8                            | 1203.63 | 39.083  | 219622 | 2 | 602.32  | -9.13  |
| P35749 MYH11_HUMAN Myosin-11 | 16 |                       | TEFSIIHYAGK             | 572  | 11 | 4  | 35.39 | b5b7°b7b10                           | 1265.64 | 58.801  | 68199  | 2 | 633.32  | -13.79 |
| P35749 MYH11_HUMAN Myosin-11 | 17 |                       | NFINSPPVAQADWAAK        | 18   | 15 | 6  | 37.04 | b10b11b12*b12y8°y8                   | 1631.80 | 45.794  | 51313  | 3 | 544.61  | -8.60  |
| P35749 MYH11_HUMAN Myosin-11 | 18 |                       | TFHFIFYMIAGAK           | 279  | 13 | 3  | 20.02 | b7b11y7                              | 1561.76 | 48.748  | 30435  | 3 | 521.26  | -20.48 |
| P35749 MYH11_HUMAN Myosin-11 | 19 |                       | DEIFATAK                | 1668 | 8  | 4  | 40.12 | b4°b4b6b7                            | 894.45  | 61.446  | 22682  | 1 | 894.45  | -8.39  |
| P35749 MYH11_HUMAN Myosin-11 | 20 |                       | IAQLEEQVEQEAR           | 1822 | 13 | 4  | 20.02 | b10*b10y4y6                          | 1542.80 | 27.353  | 17536  | 3 | 514.94  | 13.37  |
| P35749 MYH11_HUMAN Myosin-11 | 21 |                       | IVFQEFR                 | 718  | 7  | 3  | 39.69 | b6y3y6                               | 938.53  | 54.958  | 16719  | 2 | 469.77  | 21.85  |
| P35749 MYH11_HUMAN Myosin-11 | 22 |                       | YADER                   | 1466 | 5  | 1  | 12.94 | b3                                   | 653.29  | 62.216  | 10051  | 1 | 653.29  | -1.31  |
| P35749 MYH11_HUMAN Myosin-11 | 23 |                       | AEAEAR                  | 1473 | 6  | 3  | 26.31 | b4y5°y5                              | 646.31  | 53.646  | 9370   | 1 | 646.31  | -11.71 |
| P35749 MYH11_HUMAN Myosin-11 | 24 |                       | LEDEILVMDDQNNK          | 982  | 14 | 3  | 27.26 | y6y10y12                             | 1675.81 | 45.765  | 6271   | 3 | 559.27  | 12.75  |
| P35749 MYH11_HUMAN Myosin-11 | 25 |                       | LQDFASTVEALEEGK         | 1379 | 15 | 11 | 98.16 | b3b8b10b11*b11b13y6y9y10y13y14       | 1636.79 | 61.376  | 6126   | 3 | 546.27  | -11.56 |
| P35749 MYH11_HUMAN Myosin-11 | 26 |                       | ELEGHISDLQEDLDSER       | 1114 | 17 | 6  | 35.07 | b5y4°y4y6y10y11                      | 1984.90 | 71.971  | 5601   | 2 | 992.95  | -7.20  |
| P35749 MYH11_HUMAN Myosin-11 | 27 |                       | ISDLTTNLAEEEEK          | 1007 | 14 | 12 | 90.32 | b3°b3b4b10*b10y4y5y7y9y10y11*y11     | 1591.77 | 54.858  | 4873   | 2 | 796.39  | -2.53  |
| P35749 MYH11_HUMAN Myosin-11 | 28 |                       | VIENADGSEEETDTR         | 1946 | 15 | 6  | 35.97 | b4b13y3°y3y7y8                       | 1664.75 | 62.198  | 4338   | 2 | 832.88  | 16.72  |
| P35749 MYH11_HUMAN Myosin-11 | 29 |                       | AEMEDLVSSK              | 1510 | 10 | 3  | 33.2  | y3y8y9                               | 1108.54 | 29.232  | 4312   | 2 | 554.78  | 22.02  |
| P35749 MYH11_HUMAN Myosin-11 | 30 | Carbamidomethyl+C(2)  | LCTEQGSHPK              | 552  | 10 | 4  | 36.21 | y6y7°y7y8                            | 1156.54 | 32.424  | 4157   | 2 | 578.77  | -3.27  |
| P35749 MYH11_HUMAN Myosin-11 | 31 |                       | QELEEILHEMEAR           | 917  | 13 | 13 | 69.27 | b3°b3b4°b4b10°b10b11°b11y4°y4y8y9°y9 | 1626.80 | 54.904  | 3708   | 2 | 813.90  | 11.63  |
| P35749 MYH11_HUMAN Myosin-11 | 32 |                       | GQFER                   | 1573 | 5  | 2  | 25.88 | b3y3                                 | 636.30  | 19.530  | 3407   | 1 | 636.30  | -13.72 |
| P35749 MYH11_HUMAN Myosin-11 | 33 |                       | LEGDASDFHEQIADLQAQIAELK | 1059 | 23 | 4  | 22.77 | b3b4b6°b6                            | 2541.24 | 86.416  | 3389   | 2 | 1271.13 | -1.35  |
| P35749 MYH11_HUMAN Myosin-11 | 34 |                       | EILLQVEDER              | 1852 | 10 | 7  | 56.86 | b3y3°y3y4y5y8*y8                     | 1243.64 | 42.223  | 3114   | 2 | 622.32  | -10.70 |
| P35749 MYH11_HUMAN Myosin-11 | 35 | Carbamidomethyl+C(2)  | VCHLMGINVTDFTFR         | 380  | 14 | 3  | 26.47 | b3b4b9                               | 1662.80 | 58.169  | 2855   | 2 | 831.90  | -5.73  |



|                              |    |                       |                         |      |    |    |       |                                     |         |         |        |   |         |        |
|------------------------------|----|-----------------------|-------------------------|------|----|----|-------|-------------------------------------|---------|---------|--------|---|---------|--------|
| P35749 MYH11_HUMAN Myosin-11 | 36 |                       | EIENLTQQYEEK            | 1399 | 12 | 13 | 84.97 | b3°b3b6°b6b9°b9b10°b10y3y8*y8y10y11 | 1523.69 | 52.177  | 2636   | 2 | 762.35  | -22.19 |
| P35749 MYH11_HUMAN Myosin-11 | 37 |                       | ALSLAR                  | 1484 | 6  | 1  | 13.37 | y4                                  | 630.39  | 21.688  | 2614   | 2 | 315.70  | -8.42  |
| P35749 MYH11_HUMAN Myosin-11 | 38 |                       | LMTTLR                  | 663  | 6  | 1  | 13.37 | b4                                  | 734.42  | 46.343  | 2614   | 1 | 734.42  | -3.41  |
| P35749 MYH11_HUMAN Myosin-11 | 39 |                       | DVASLSSQLQDTQELLQEETR   | 1308 | 21 | 7  | 51.29 | b7b8°b8b11b12b13y11                 | 2390.12 | 94.585  | 2600   | 3 | 797.38  | -21.14 |
| P35749 MYH11_HUMAN Myosin-11 | 40 |                       | SFVEK                   | 547  | 5  | 2  | 12.94 | b4°b4                               | 609.33  | 25.833  | 2297   | 1 | 609.33  | 5.61   |
| P35749 MYH11_HUMAN Myosin-11 | 41 |                       | EQADFAVEALAK            | 414  | 12 | 3  | 34.85 | b9b10b11                            | 1291.63 | 53.616  | 2190   | 1 | 1291.63 | -20.13 |
| P35749 MYH11_HUMAN Myosin-11 | 42 | Carbamidomethyl+C(12) | ITDVIMAFQAMCR           | 785  | 13 | 7  | 53.1  | b3b7b8°b8b11y4y10                   | 1555.76 | 62.269  | 1996   | 2 | 778.38  | 8.55   |
| P35749 MYH11_HUMAN Myosin-11 | 43 |                       | HEMPPHIYAIADTAYR        | 147  | 16 | 4  | 29.97 | b7b8y5y7                            | 1884.92 | 68.875  | 1932   | 2 | 942.96  | 4.86   |
| P35749 MYH11_HUMAN Myosin-11 | 44 |                       | QEVEHK                  | 1247 | 6  | 2  | 29.33 | b3b5                                | 769.37  | 30.964  | 1877   | 2 | 385.19  | -13.25 |
| P35749 MYH11_HUMAN Myosin-11 | 45 |                       | ELEDAR                  | 1659 | 6  | 1  | 13.37 | b5                                  | 732.36  | 106.451 | 1774   | 1 | 732.36  | 10.92  |
| P35749 MYH11_HUMAN Myosin-11 | 46 |                       | NLLQEQLQAETELYAEAEEMRVR | 889  | 23 | 3  | 21.72 | b3y8y9                              | 2763.35 | 72.492  | 108480 | 3 | 921.79  | -5.57  |
| P35749 MYH11_HUMAN Myosin-11 | 47 |                       | IRELEGHISDLQEDLDSER     | 1112 | 19 | 4  | 22.25 | b6y4°y4y5                           | 2254.11 | 78.063  | 46597  | 2 | 1127.56 | 8.99   |
| P35749 MYH11_HUMAN Myosin-11 | 48 |                       | DFQRELEDAR              | 1655 | 10 | 3  | 26.21 | b5b8y6                              | 1278.62 | 91.354  | 26660  | 2 | 639.82  | 13.18  |
| P35749 MYH11_HUMAN Myosin-11 | 49 |                       | NSLQDQLDEEMEAKQNLER     | 1345 | 19 | 4  | 14.47 | b14y9*y9y12                         | 2290.06 | 89.082  | 20132  | 2 | 1145.54 | 1.39   |
| P35749 MYH11_HUMAN Myosin-11 | 50 |                       | TEFSIIHYAGKVDYNASAWLTK  | 572  | 22 | 3  | 13.05 | b4b11y8                             | 2514.27 | 67.169  | 18630  | 3 | 838.76  | 3.20   |
| P35749 MYH11_HUMAN Myosin-11 | 51 |                       | SHEAQVQEMRQK            | 1188 | 12 | 4  | 34.85 | b4b5°b5b6                           | 1470.71 | 42.326  | 15709  | 3 | 490.91  | 1.99   |
| P35749 MYH11_HUMAN Myosin-11 | 52 |                       | QTLEKENADLAGELR         | 1226 | 15 | 7  | 17.57 | b3*b3b8°b8*b8y12°y12                | 1686.88 | 91.774  | 10807  | 2 | 843.94  | 6.01   |
| P35749 MYH11_HUMAN Myosin-11 | 53 |                       | QEEEMQAKEDLQK           | 849  | 14 | 4  | 18.69 | b3°b3b12y6                          | 1734.77 | 80.565  | 10126  | 3 | 578.93  | -8.16  |
| P35749 MYH11_HUMAN Myosin-11 | 54 |                       | ENADLAGELRVLGQAK        | 1231 | 16 | 5  | 39.02 | b7b10*b10b11b12                     | 1683.89 | 73.341  | 10110  | 3 | 561.97  | -6.67  |
| P35749 MYH11_HUMAN Myosin-11 | 55 |                       | IAQLEEELEEEQGNMEAMSDRVR | 1737 | 23 | 4  | 23.16 | b4y8y9y12                           | 2706.20 | 90.145  | 8697   | 3 | 902.74  | -12.27 |
| P35749 MYH11_HUMAN Myosin-11 | 56 |                       | NISSKYADER              | 1461 | 10 | 6  | 39.15 | b3°b3b7b8y8°y8                      | 1182.57 | 40.190  | 8033   | 2 | 591.79  | -5.57  |
| P35749 MYH11_HUMAN Myosin-11 | 57 |                       | RHEMPPHIYAIADTAYR       | 146  | 17 | 3  | 22.78 | b15y6y7                             | 2041.02 | 80.571  | 6732   | 3 | 681.01  | 7.06   |
| P35749 MYH11_HUMAN Myosin-11 | 58 |                       | KMAQQMLDLEEQLEEEEAAR    | 946  | 20 | 10 | 61.12 | b8°b8b9b12y6y8y9°y9y10y12           | 2391.08 | 90.002  | 6099   | 3 | 797.70  | -14.50 |
| P35749 MYH11_HUMAN Myosin-11 | 59 |                       | ALDEETRSHEAQVQEMR       | 1181 | 17 | 4  | 26.6  | b3y5y6y10                           | 2028.95 | 83.679  | 5600   | 3 | 676.99  | 4.15   |
| P35749 MYH11_HUMAN Myosin-11 | 60 |                       | LQNEVESVTGMLNAAEGKAIK   | 1284 | 21 | 4  | 29.32 | b6b8b9b12                           | 2260.13 | 68.773  | 4997   | 4 | 565.79  | -8.86  |
| P35749 MYH11_HUMAN Myosin-11 | 61 |                       | SLEADLMQLQEDLAAAERAR    | 1683 | 20 | 3  | 13.93 | b5b8y3                              | 2230.13 | 108.789 | 4618   | 3 | 744.05  | 6.79   |
| P35749 MYH11_HUMAN Myosin-11 | 62 |                       | LLEERISDLTTNLAEEEEK     | 1002 | 19 | 3  | 21.43 | y3y6y8                              | 2232.09 | 105.954 | 4210   | 2 | 1116.55 | -14.22 |
| P35749 MYH11_HUMAN Myosin-11 | 63 |                       | QKKAENELK               | 867  | 9  | 4  | 29.76 | b5°b5y5y6                           | 1087.59 | 50.115  | 4067   | 2 | 544.30  | 13.58  |
| P35749 MYH11_HUMAN Myosin-11 | 64 |                       | EEKGDEVVVELVENGK        | 51   | 16 | 4  | 34.25 | b3b4b11b13                          | 1772.87 | 63.024  | 3607   | 2 | 886.94  | -11.36 |

|                              |    |                       |                                   |      |    |    |        |                                                                     |         |         |        |   |         |        |
|------------------------------|----|-----------------------|-----------------------------------|------|----|----|--------|---------------------------------------------------------------------|---------|---------|--------|---|---------|--------|
| P35749 MYH11_HUMAN Myosin-11 | 65 |                       | RQLEEAEEESQR                      | 1883 | 12 | 6  | 31.26  | b4*b4b8y4°y4y8                                                      | 1503.70 | 54.827  | 3528   | 2 | 752.35  | -1.87  |
| P35749 MYH11_HUMAN Myosin-11 | 66 |                       | DVASLSSQLQDTQELLQEETRQK           | 1308 | 23 | 3  | 12.68  | b4b6y4                                                              | 2646.33 | 101.881 | 3190   | 3 | 882.78  | 4.43   |
| P35749 MYH11_HUMAN Myosin-11 | 67 | Carbamidomethyl+C(17) | NTDQASMPDNTAAQKVCHLMGINVTDFTFR    | 365  | 29 | 3  | 17.28  | y5y8y10                                                             | 3235.46 | 112.481 | 2835   | 3 | 1079.16 | -9.13  |
| P35749 MYH11_HUMAN Myosin-11 | 68 |                       | NKHESMISELEVR                     | 1029 | 13 | 6  | 33.17  | b5y6y8°y8y10°y10                                                    | 1571.77 | 54.892  | 2340   | 2 | 786.39  | -9.16  |
| P35749 MYH11_HUMAN Myosin-11 | 69 |                       | FQKEIENLTQQYEEK                   | 1396 | 15 | 6  | 23.59  | b11°b11y10°y10*y10y11                                               | 1926.95 | 86.114  | 2228   | 2 | 963.98  | 3.29   |
| P35749 MYH11_HUMAN Myosin-11 | 70 | Carbamidomethyl+C(7)  | SFVEKLCTEQGSHPK                   | 547  | 15 | 7  | 46.99  | b3°b3b4b9y3y5y11                                                    | 1746.85 | 90.771  | 2202   | 4 | 437.47  | 2.66   |
| P35749 MYH11_HUMAN Myosin-11 | 71 | Carbamidomethyl+C(13) | SMLQDREDQSILCTGESGAGK             | 163  | 21 | 6  | 13.46  | b4*b4b11°b11*b11y15                                                 | 2282.05 | 79.809  | 1881   | 3 | 761.35  | 3.42   |
| P35749 MYH11_HUMAN Myosin-11 | 72 | Carbamidomethyl+C(15) | DLKITDVMIFQAMCR                   | 782  | 16 | 3  | 24.32  | y4y8y12                                                             | 1911.93 | 85.998  | 1807   | 2 | 956.47  | -9.64  |
| P35749 MYH11_HUMAN Myosin-11 | 73 |                       | VDYNASAWLTKNMDPLNDNVTSLLNASSDK    | 583  | 30 | 4  | 11.2   | b9y10*y10y14                                                        | 3296.58 | 137.716 | 1761   | 3 | 1099.53 | 1.70   |
| P35749 MYH11_HUMAN Myosin-11 | 74 | Phosphoryl STY(7)     | QGFEAASIKEEK                      | 42   | 12 | 5  | 48.48  | b3b6b10b11y7                                                        | 1416.63 | 50.039  | 92650  | 3 | 472.88  | 1.12   |
| P35749 MYH11_HUMAN Myosin-11 | 75 | Phosphoryl STY(12)    | HISTLNIQLSDSKK                    | 1364 | 14 | 3  | 18.69  | b11b13y12                                                           | 1663.84 | 103.605 | 76572  | 2 | 832.42  | 5.21   |
| P35749 MYH11_HUMAN Myosin-11 | 76 | Phosphoryl STY(7)     | LQDFASTVEALEEGKK                  | 1379 | 16 | 4  | 34.02  | b4b5*b5b6                                                           | 1844.88 | 65.413  | 27290  | 3 | 615.63  | 10.79  |
| P35749 MYH11_HUMAN Myosin-11 | 77 | Phosphoryl STY(9)     | IRELEGHISDLQEDLDSER               | 1112 | 19 | 5  | 40.39  | y5y6y9*y9y10                                                        | 2334.05 | 87.926  | 13775  | 4 | 584.27  | -1.05  |
| P35749 MYH11_HUMAN Myosin-11 | 78 | Phosphoryl STY(12)    | DVASLSSQLQDTQELLQEETR             | 1308 | 21 | 4  | 26.68  | b10b12_HPO3 b12y5y6                                                 | 2470.12 | 64.256  | 6888   | 3 | 824.05  | -0.99  |
| P35749 MYH11_HUMAN Myosin-11 | 79 | Phosphoryl STY(11)    | NLLQEQLQAETELYAEAEEMR             | 889  | 21 | 8  | 48.37  | b11°b11b12b13°b13*b13y9y10                                          | 2588.16 | 92.761  | 3744   | 2 | 1294.58 | 3.87   |
| P35749 MYH11_HUMAN Myosin-11 | 80 | Phosphoryl STY(7)     | TFHIFYYMIAGAK                     | 279  | 13 | 5  | 27.5   | b3°b3b5°b5b6                                                        | 1641.75 | 42.260  | 2454   | 2 | 821.38  | 4.91   |
| P35749 MYH11_HUMAN Myosin-11 | 81 | Oxidation+M(9)        | SHEAQVQEMR                        | 1188 | 10 | 4  | 39.15  | b7y4y5y8                                                            | 1230.57 | 27.678  | 13318  | 2 | 615.79  | 13.49  |
| Q7Z406 MYH14_HUMAN Myosin-14 | 1  |                       | QLLQANPILEAFGNAK                  | 236  | 16 | 26 | 154.41 | b2*b2b3*b3b4*b4b6*b6b16y1y2y4*y4y5y6y7°y7*y7y8*y8y10y11y12y13y14y16 | 1726.95 | 90.793  | 175864 | 2 | 863.98  | 0.92   |
| Q7Z406 MYH14_HUMAN Myosin-14 | 2  |                       | KEEELQAALAR                       | 1104 | 11 | 6  | 65.53  | b6y3y5y7y10y11                                                      | 1257.68 | 42.097  | 79629  | 2 | 629.34  | 1.26   |
| Q7Z406 MYH14_HUMAN Myosin-14 | 3  |                       | LAQAEEQLEQETR                     | 1839 | 13 | 7  | 57.36  | b4b5b6°b6b8b9y13                                                    | 1544.75 | 50.659  | 61941  | 2 | 772.88  | -0.32  |
| Q7Z406 MYH14_HUMAN Myosin-14 | 4  | Carbamidomethyl+C(1)  | CNGVLEGIR                         | 717  | 9  | 6  | 53.49  | b2*b2y3y4y5y7                                                       | 1017.51 | 48.410  | 37209  | 2 | 509.26  | -3.60  |
| Q7Z406 MYH14_HUMAN Myosin-14 | 5  |                       | VIQYLAHVASSPK                     | 210  | 13 | 5  | 20.02  | b2b11y5y8°y8                                                        | 1412.78 | 54.984  | 16186  | 2 | 706.89  | -7.52  |
| Q7Z406 MYH14_HUMAN Myosin-14 | 6  |                       | QEEEGAGALEEGEEARR                 | 1396 | 16 | 6  | 27.52  | b1b5b6b8y7y16                                                       | 1744.81 | 49.355  | 12600  | 3 | 582.28  | 1.75   |
| Q7Z406 MYH14_HUMAN Myosin-14 | 7  |                       | AMEAEAAGLR                        | 1356 | 10 | 5  | 40.12  | b3b4y3y6y10                                                         | 1018.51 | 44.173  | 10595  | 2 | 509.76  | 14.14  |
| Q7Z406 MYH14_HUMAN Myosin-14 | 8  |                       | ASISYGSNMRPQSQTWR                 | 1040 | 17 | 4  | 36.11  | b11b12y10y11                                                        | 1968.91 | 59.602  | 4116   | 2 | 984.96  | -10.04 |
| Q7Z406 MYH14_HUMAN Myosin-14 | 9  | Carbamidomethyl+C(13) | SMLQDREDQSILCTGESGAGK             | 183  | 21 | 5  | 43.4   | y4y7y10y11y12                                                       | 2282.05 | 75.365  | 3713   | 4 | 571.27  | 6.85   |
| Q7Z406 MYH14_HUMAN Myosin-14 | 10 |                       | LEEGVASDEEAEEAQPGSGPSPEPEGSPPAHPQ | 1962 | 33 | 4  | 15.2   | b7y5y7y12                                                           | 3311.47 | 62.236  | 3134   | 4 | 828.62  | 7.45   |
| Q7Z406 MYH14_HUMAN Myosin-14 | 11 |                       | LMATLSNTNPSFVR                    | 680  | 14 | 5  | 18.69  | b11*b11b13°b13y13                                                   | 1550.78 | 98.400  | 2363   | 2 | 775.89  | -11.26 |

|                              |    |                       |                       |      |    |    |       |                                       |         |         |        |   |         |        |
|------------------------------|----|-----------------------|-----------------------|------|----|----|-------|---------------------------------------|---------|---------|--------|---|---------|--------|
| Q7Z406 MYH14_HUMAN Myosin-14 | 12 |                       | ELSSTEAQLHDAQELLQEETR | 1325 | 21 | 5  | 13.46 | b10y2°y2y3y5                          | 2427.17 | 98.317  | 2265   | 2 | 1214.09 | 1.31   |
| Q7Z406 MYH14_HUMAN Myosin-14 | 13 |                       | DAEVERDEER            | 1616 | 10 | 7  | 27.97 | b2°b2b4°b4y7y8y10                     | 1247.54 | 29.276  | 1774   | 3 | 416.52  | -9.69  |
| Q7Z406 MYH14_HUMAN Myosin-14 | 14 | Carbamidomethyl+C(8)  | ADLLEPCSHYR           | 316  | 12 | 7  | 21.63 | b2°b2b6b9y2y10°y10                    | 1473.74 | 114.189 | 1749   | 2 | 737.37  | 13.83  |
| Q7Z406 MYH14_HUMAN Myosin-14 | 15 |                       | GELEDTL DSTNAQQELR    | 1169 | 17 | 8  | 38.36 | y5y11*y11y12°y12*y12<br>y13°y13       | 1918.86 | 59.525  | 103434 | 3 | 640.29  | -17.75 |
| Q7Z406 MYH14_HUMAN Myosin-14 | 16 |                       | HEVPPHVYAVTEGAYR      | 167  | 16 | 7  | 51.76 | b3b5b8°b8b9b10y4                      | 1824.87 | 87.901  | 78087  | 2 | 912.94  | -16.99 |
| Q7Z406 MYH14_HUMAN Myosin-14 | 17 |                       | AAVTMSVPGR            | 1    | 10 | 4  | 27.97 | b3y5y6°y6                             | 988.50  | 27.788  | 51344  | 2 | 494.76  | -21.86 |
| Q7Z406 MYH14_HUMAN Myosin-14 | 18 | Carbamidomethyl+C(1)  | CIVPNHEK              | 694  | 8  | 4  | 32.34 | b3y5°y5y6                             | 996.49  | 30.076  | 16422  | 2 | 498.75  | -7.72  |
| Q7Z406 MYH14_HUMAN Myosin-14 | 19 |                       | LDGESSELQEQMVEQQQR    | 1076 | 18 | 8  | 41.7  | b7b11*b11y8°y8y9°y9y<br>10            | 2134.01 | 100.236 | 14935  | 2 | 1067.51 | 19.91  |
| Q7Z406 MYH14_HUMAN Myosin-14 | 20 |                       | GLEAEVLR              | 1700 | 8  | 4  | 40.12 | b4b5°b5b7                             | 886.49  | 26.599  | 13204  | 2 | 443.75  | -15.84 |
| Q7Z406 MYH14_HUMAN Myosin-14 | 21 | Carbamidomethyl+C(9)  | AEDMAELTCLNEASVLHNLR  | 106  | 20 | 3  | 13.93 | b10y4y11                              | 2286.09 | 114.307 | 12784  | 2 | 1143.55 | 2.56   |
| Q7Z406 MYH14_HUMAN Myosin-14 | 22 |                       | QIQELR                | 1809 | 6  | 1  | 13.37 | y3                                    | 786.45  | 46.788  | 10686  | 2 | 393.73  | 4.11   |
| Q7Z406 MYH14_HUMAN Myosin-14 | 23 |                       | QEEEAGALEAGEEAR       | 1396 | 15 | 5  | 43.57 | b10y3y7y11y13                         | 1588.73 | 45.054  | 10593  | 3 | 530.25  | 11.83  |
| Q7Z406 MYH14_HUMAN Myosin-14 | 24 |                       | LGQLEEELEEEQNSSELLNDR | 1754 | 21 | 10 | 45.41 | b4b6°b6y3*y3y4°y4y8y<br>9°y9          | 2474.12 | 111.843 | 7904   | 3 | 825.38  | -14.70 |
| Q7Z406 MYH14_HUMAN Myosin-14 | 25 |                       | FLTNGPSSSPGQER        | 328  | 14 | 7  | 26.7  | b10b13*b13y5°y5*y5y8                  | 1476.72 | 54.877  | 7230   | 2 | 738.87  | 10.17  |
| Q7Z406 MYH14_HUMAN Myosin-14 | 26 |                       | ELQTAQAQLSEWR         | 1381 | 13 | 4  | 27.5  | y3y8y9°y9                             | 1559.77 | 71.872  | 7192   | 2 | 780.39  | -5.63  |
| Q7Z406 MYH14_HUMAN Myosin-14 | 27 |                       | QMQTEK                | 956  | 6  | 1  | 13.37 | y5                                    | 764.37  | 25.707  | 4034   | 1 | 764.37  | 8.38   |
| Q7Z406 MYH14_HUMAN Myosin-14 | 28 |                       | EVVLQVEEER            | 1869 | 10 | 4  | 40.98 | y3y5y7°y7                             | 1229.66 | 29.319  | 3316   | 3 | 410.56  | 21.54  |
| Q7Z406 MYH14_HUMAN Myosin-14 | 29 |                       | VAEQAANDLR            | 1552 | 10 | 5  | 26.21 | b4*b4y7y9°y9                          | 1086.54 | 71.188  | 2903   | 2 | 543.77  | -15.17 |
| Q7Z406 MYH14_HUMAN Myosin-14 | 30 |                       | AQVTELEDELTA AEDAK    | 1562 | 17 | 8  | 49.77 | b3b7*b7b11*b11b12b1<br>3y3            | 1832.91 | 65.995  | 2850   | 3 | 611.64  | 18.91  |
| Q7Z406 MYH14_HUMAN Myosin-14 | 31 |                       | NMDPLNDNV AALLHQSTDR  | 613  | 19 | 11 | 56.9  | b5b7b10°b10b12°b12b1<br>3°b13y4y13y16 | 2123.99 | 107.921 | 2832   | 2 | 1062.50 | -12.64 |
| Q7Z406 MYH14_HUMAN Myosin-14 | 32 |                       | LQQLFNHTMFVLEQEEYQR   | 501  | 19 | 4  | 14.47 | b11y6y9°y9                            | 2453.23 | 105.525 | 2748   | 2 | 1227.12 | 15.43  |
| Q7Z406 MYH14_HUMAN Myosin-14 | 33 |                       | LQEELAASDR            | 1708 | 10 | 7  | 40.12 | b4b6°b6*b6y3°y3y4                     | 1131.54 | 36.907  | 2086   | 2 | 566.28  | -18.12 |
| Q7Z406 MYH14_HUMAN Myosin-14 | 34 |                       | AQAELENVSGALNEAESK    | 1301 | 18 | 5  | 24.05 | b14y5y10*y10y14                       | 1859.89 | 57.639  | 1989   | 3 | 620.63  | -4.33  |
| Q7Z406 MYH14_HUMAN Myosin-14 | 35 |                       | AEAEGR                | 1490 | 6  | 2  | 13.37 | y4°y4                                 | 632.31  | 29.263  | 1714   | 1 | 632.31  | 11.58  |
| Q7Z406 MYH14_HUMAN Myosin-14 | 36 | Carbamidomethyl+C(14) | YYSGLIYTYGLFCVVINPYK  | 128  | 21 | 4  | 18.23 | b3b9y4y11                             | 2520.24 | 82.601  | 1655   | 3 | 840.75  | -4.55  |
| Q7Z406 MYH14_HUMAN Myosin-14 | 37 |                       | NTDQATMPDNTAAQK       | 384  | 15 | 6  | 35.97 | b5b6b12y4y11°y11                      | 1605.74 | 32.020  | 1611   | 2 | 803.37  | 13.30  |
| Q7Z406 MYH14_HUMAN Myosin-14 | 38 | Carbamidomethyl+C(9)  | SVHELERACR            | 1542 | 10 | 4  | 42.16 | b5y6y7y8                              | 1256.62 | 47.865  | 105945 | 2 | 628.82  | 6.12   |
| Q7Z406 MYH14_HUMAN Myosin-14 | 39 |                       | AMEAEAAGLREQL EEEAAAR | 1356 | 20 | 4  | 31.28 | y7y9y11y16                            | 2145.01 | 57.984  | 65912  | 3 | 715.68  | -4.78  |
| Q7Z406 MYH14_HUMAN Myosin-14 | 40 |                       | RQEEEAGALEAGEEAR      | 1395 | 16 | 3  | 16.61 | b11b14y9                              | 1744.83 | 109.476 | 35800  | 2 | 872.92  | 11.89  |

|                              |    |                                         |                                |      |    |    |       |                                                                                  |         |         |        |   |         |        |
|------------------------------|----|-----------------------------------------|--------------------------------|------|----|----|-------|----------------------------------------------------------------------------------|---------|---------|--------|---|---------|--------|
| Q7Z406 MYH14_HUMAN Myosin-14 | 41 |                                         | EQADFALEALAKATYER              | 433  | 17 | 4  | 29.12 | b7b8y3y5                                                                         | 1925.94 | 101.756 | 24967  | 3 | 642.65  | -10.27 |
| Q7Z406 MYH14_HUMAN Myosin-14 | 42 |                                         | AVEERER                        | 1483 | 7  | 3  | 39.69 | b4b6y6                                                                           | 888.45  | 42.844  | 21755  | 2 | 444.73  | 1.03   |
| Q7Z406 MYH14_HUMAN Myosin-14 | 43 |                                         | LQRAQAELENVSGALNEAESK          | 1298 | 21 | 5  | 18.23 | b8b13y4 <sup>4</sup> y4y18                                                       | 2257.15 | 46.573  | 20067  | 3 | 753.05  | 1.41   |
| Q7Z406 MYH14_HUMAN Myosin-14 | 44 |                                         | RLQQEELDDATMDLEQQR             | 1440 | 17 | 4  | 15.8  | b13y10 <sup>y</sup> 10y16                                                        | 2089.02 | 71.915  | 15403  | 3 | 697.01  | 9.93   |
| Q7Z406 MYH14_HUMAN Myosin-14 | 45 |                                         | AQTKEQADFALEALAK               | 429  | 16 | 10 | 48.37 | b5 <sup>b</sup> b5b6 <sup>b</sup> b6b7 <sup>b</sup> b7b13 <sup>b</sup> b13y12y15 | 1733.89 | 90.778  | 10141  | 2 | 867.45  | -11.48 |
| Q7Z406 MYH14_HUMAN Myosin-14 | 46 |                                         | VAQEQQGGHPKFQRPR               | 571  | 15 | 3  | 25.65 | b3b8b11                                                                          | 1734.90 | 104.408 | 7892   | 2 | 867.95  | -10.91 |
| Q7Z406 MYH14_HUMAN Myosin-14 | 47 |                                         | RQLEEAEEEEASR                  | 1900 | 12 | 4  | 28.83 | b7b9b10 <sup>b</sup> b10                                                         | 1446.69 | 77.460  | 6283   | 2 | 723.85  | 8.27   |
| Q7Z406 MYH14_HUMAN Myosin-14 | 48 |                                         | GRLGEEDAGAR                    | 1815 | 11 | 3  | 23.63 | b7b10y7                                                                          | 1130.56 | 92.211  | 6278   | 1 | 1130.56 | 5.07   |
| Q7Z406 MYH14_HUMAN Myosin-14 | 49 |                                         | AQELQKVQELQQSAR                | 874  | 16 | 4  | 16.61 | b4y5 <sup>y</sup> 5y10                                                           | 1883.99 | 101.845 | 6232   | 2 | 942.50  | -0.39  |
| Q7Z406 MYH14_HUMAN Myosin-14 | 50 |                                         | EEIFSQNRESEK                   | 1685 | 12 | 4  | 43.99 | b4b6b7b9                                                                         | 1495.72 | 40.201  | 5928   | 3 | 499.24  | 8.98   |
| Q7Z406 MYH14_HUMAN Myosin-14 | 51 |                                         | LGEEDAGARAR                    | 1817 | 11 | 3  | 26.64 | b3b4y10                                                                          | 1144.58 | 111.831 | 4635   | 1 | 1144.58 | 11.52  |
| Q7Z406 MYH14_HUMAN Myosin-14 | 52 |                                         | VAEQAANDLRAQVTELEDELTA<br>EDAK | 1552 | 27 | 3  | 11.65 | b4b9y11                                                                          | 2900.44 | 95.334  | 4147   | 3 | 967.49  | 10.35  |
| Q7Z406 MYH14_HUMAN Myosin-14 | 53 |                                         | EQLEEEEAAARER                  | 1366 | 12 | 6  | 48.97 | b8b9b10y7 <sup>y</sup> 7y9                                                       | 1430.71 | 41.061  | 3796   | 2 | 715.86  | 13.31  |
| Q7Z406 MYH14_HUMAN Myosin-14 | 54 |                                         | TSREEIFSQNR                    | 1682 | 11 | 3  | 23.63 | b5b10y7                                                                          | 1366.65 | 136.291 | 3631   | 1 | 1366.65 | -14.65 |
| Q7Z406 MYH14_HUMAN Myosin-14 | 55 | Carbamidomethyl+C(4)                    | SGSCWKIVWPSSHPR                | 1016 | 15 | 3  | 17.57 | b10y9y12                                                                         | 1783.85 | 104.386 | 3629   | 2 | 892.43  | -8.35  |
| Q7Z406 MYH14_HUMAN Myosin-14 | 56 |                                         | LAETETVDR                      | 1424 | 10 | 4  | 33.2  | b6b8 <sup>b</sup> b8b9                                                           | 1161.62 | 61.395  | 3205   | 2 | 581.31  | 8.09   |
| Q7Z406 MYH14_HUMAN Myosin-14 | 57 | Carbamidomethyl+C(6)                    | VMQRNCAAYLK                    | 834  | 11 | 3  | 26.64 | b8b9y9                                                                           | 1353.68 | 73.054  | 2678   | 2 | 677.34  | 0.72   |
| Q7Z406 MYH14_HUMAN Myosin-14 | 58 |                                         | SLREAQAALAEAQEDLESER           | 1128 | 20 | 6  | 19.04 | b4 <sup>b</sup> b4b18y3y12 <sup>y</sup> 12                                       | 2216.09 | 96.611  | 2421   | 3 | 739.37  | 6.61   |
| Q7Z406 MYH14_HUMAN Myosin-14 | 59 |                                         | VDYKANEWLMK                    | 602  | 11 | 8  | 51.27 | b7 <sup>b</sup> b7b9y3y6 <sup>y</sup> 6y10 <sup>y</sup> 10                       | 1396.69 | 90.050  | 2312   | 2 | 698.85  | -4.28  |
| Q7Z406 MYH14_HUMAN Myosin-14 | 60 |                                         | QLEEAEEEEASRAQGR               | 1901 | 16 | 3  | 34.02 | y11y12y13                                                                        | 1773.81 | 110.429 | 2281   | 2 | 887.41  | -13.56 |
| Q7Z406 MYH14_HUMAN Myosin-14 | 61 |                                         | AEDEGGARAQLLK                  | 1115 | 13 | 3  | 20.02 | b11y5y8                                                                          | 1357.69 | 45.740  | 2247   | 2 | 679.35  | -9.44  |
| Q7Z406 MYH14_HUMAN Myosin-14 | 62 | Carbamidomethyl+C(15)                   | LMATLSNTNPSFVRCIVPNHEK         | 680  | 22 | 4  | 13.05 | b3b10 <sup>b</sup> b10y8                                                         | 2528.24 | 136.358 | 2162   | 2 | 1264.62 | -12.84 |
| Q7Z406 MYH14_HUMAN Myosin-14 | 63 | Phosphoryl STY(9)                       | LLLQVESLTTELSAER               | 1778 | 16 | 4  | 16.61 | b12_HPO3<br>b12 <sup>b</sup> b12y6y9                                             | 1881.95 | 70.527  | 105457 | 2 | 941.48  | -0.26  |
| Q7Z406 MYH14_HUMAN Myosin-14 | 64 | Phosphoryl STY(12)                      | LAQAEQELETRETRER               | 1839 | 15 | 5  | 30.97 | b10b11y6y10 <sup>y</sup> 10                                                      | 1909.83 | 45.722  | 2837   | 2 | 955.42  | -14.00 |
| Q7Z406 MYH14_HUMAN Myosin-14 | 65 | Oxidation+M(2)                          | AMEAEAAGLREQLEEEAAARER         | 1356 | 22 | 7  | 34.17 | b6b9b13b19y8 <sup>y</sup> 8y10                                                   | 2446.14 | 66.765  | 3972   | 3 | 816.05  | -8.18  |
| Q7Z406 MYH14_HUMAN Myosin-14 | 66 | Oxidation+M(9)                          | ASISYGSNMRPQSQTWR              | 1040 | 17 | 4  | 32.92 | b5b11b14b15                                                                      | 1984.91 | 93.973  | 3091   | 2 | 992.96  | -10.45 |
| Q7Z406 MYH14_HUMAN Myosin-14 | 67 | Oxidation+M(3)                          | AQMASAGQGKEEAVK                | 1647 | 15 | 5  | 28.59 | b3b10 <sup>b</sup> b10b13y12                                                     | 1520.74 | 67.651  | 2174   | 3 | 507.58  | -0.32  |
| Q7Z406 MYH14_HUMAN Myosin-14 | 68 | Carbamidomethyl+C(13)<br>;Oxidation+M() | SMLQDREDQSILCTGESGAGK          | 183  | 21 | 3  | 13.46 | b4y8y12                                                                          | 2298.02 | 96.757  | 1591   | 3 | 766.68  | -7.22  |
| Q7Z406 MYH14_HUMAN Myosin-14 | 69 |                                         | VERDEER                        | 1619 | 7  | 1  | 8.1   | b3                                                                               | 932.45  | 29.217  | 8053   | 2 | 466.73  | 12.44  |

|                                                |    |                                                     |                                       |      |    |    |        |                                        |         |         |        |   |         |        |
|------------------------------------------------|----|-----------------------------------------------------|---------------------------------------|------|----|----|--------|----------------------------------------|---------|---------|--------|---|---------|--------|
| Q7Z406 MYH14_HUMAN Myosin-14                   | 70 |                                                     | LEEGVASDEEAEAAQPGSGPSPEP<br>EGSPPAHPQ | 1962 | 33 | 2  | 12.48  | b3b9                                   | 3294.43 | 62.180  | 5995   | 4 | 824.36  | 4.15   |
| Q86UX7 URP2_HUMAN Fermitin family<br>homolog 3 | 1  |                                                     | VVLAGGVAPALFR                         | 166  | 13 | 14 | 115.08 | b1b2b3b4b6y1y5y6y7y8<br>y9y10y11y13    | 1269.76 | 76.969  | 189821 | 2 | 635.39  | -3.08  |
| Q86UX7 URP2_HUMAN Fermitin family<br>homolog 3 | 2  | Carbamidomethyl+C(15)                               | ASFSQPLFQAVAAICR                      | 113  | 16 | 12 | 113.36 | b4b5y2y3y4y5y6y7y8y9<br>y11y16         | 1765.91 | 91.213  | 109207 | 2 | 883.46  | 3.46   |
| Q86UX7 URP2_HUMAN Fermitin family<br>homolog 3 | 3  |                                                     | TGSGGPGNHPHPGDASAEGLNPY<br>GLVAPR     | 481  | 29 | 14 | 109.96 | b12b14b21y2y3y4y5y6y<br>7y8y9y11y12y29 | 2782.31 | 59.010  | 100574 | 4 | 696.33  | -6.05  |
| Q86UX7 URP2_HUMAN Fermitin family<br>homolog 3 | 4  |                                                     | LLVPSPEGMSEIYLR                       | 423  | 15 | 4  | 17.57  | b3y3y12y15                             | 1703.91 | 85.140  | 100343 | 2 | 852.46  | 2.36   |
| Q86UX7 URP2_HUMAN Fermitin family<br>homolog 3 | 5  |                                                     | LEGSAPTDVLDLSTTIPELKDHLR              | 333  | 24 | 8  | 39.55  | b8b11y3y4y6y8y19y24                    | 2620.35 | 88.274  | 92487  | 4 | 655.84  | -13.42 |
| Q86UX7 URP2_HUMAN Fermitin family<br>homolog 3 | 6  |                                                     | ILEAHQNVAAQLSLAEALQR                  | 523  | 19 | 9  | 36.17  | b8°b8b9y1y4y6*y6y8y1<br>9              | 2104.13 | 65.498  | 81342  | 3 | 702.05  | -10.67 |
| Q86UX7 URP2_HUMAN Fermitin family<br>homolog 3 | 7  |                                                     | AGDALWLR                              | 242  | 8  | 4  | 35.35  | b7y2y3y6                               | 901.48  | 61.223  | 50590  | 2 | 451.24  | -8.87  |
| Q86UX7 URP2_HUMAN Fermitin family<br>homolog 3 | 8  | Carbamidomethyl+C(16)<br>;Carbamidomethyl+C(21<br>) | QVAIEFDEHINVAFSCVSASCR                | 607  | 22 | 4  | 13.05  | b14*b14b18y5                           | 2539.15 | 80.839  | 48223  | 3 | 847.06  | -7.02  |
| Q86UX7 URP2_HUMAN Fermitin family<br>homolog 3 | 9  | Carbamidomethyl+C(2)                                | GCEVVPDVNVSGQK                        | 405  | 14 | 9  | 60.73  | b2b3b4y3*y3y4y9y10y1<br>4              | 1487.72 | 47.637  | 47304  | 2 | 744.36  | 1.56   |
| Q86UX7 URP2_HUMAN Fermitin family<br>homolog 3 | 10 |                                                     | LEGSAPTDVLDLSTTIPELK                  | 333  | 20 | 5  | 13.93  | b2b10y4y15y20                          | 2099.13 | 94.687  | 41941  | 2 | 1050.07 | 6.51   |
| Q86UX7 URP2_HUMAN Fermitin family<br>homolog 3 | 11 |                                                     | VFVGEEDPEAESVTLR                      | 19   | 16 | 5  | 14.09  | b2y2y7y11°y11                          | 1776.87 | 59.712  | 41285  | 2 | 888.94  | 5.50   |
| Q86UX7 URP2_HUMAN Fermitin family<br>homolog 3 | 12 |                                                     | LSQSGEVGEAGTDPGLDLDVA<br>LSNLEVK      | 303  | 30 | 10 | 18.58  | b2b9b16y1y2y6y8y16*y<br>16y30          | 3025.49 | 95.094  | 31124  | 3 | 1009.17 | 0.65   |
| Q86UX7 URP2_HUMAN Fermitin family<br>homolog 3 | 13 |                                                     | GEELDEDLFLQLTGGHEAF                   | 648  | 19 | 10 | 46.25  | b4b13b18y1y5y6y11y13<br>°y13y19        | 2120.01 | 100.344 | 16716  | 2 | 1060.51 | 11.06  |
| Q86UX7 URP2_HUMAN Fermitin family<br>homolog 3 | 14 |                                                     | TMADSSYTSEVQAILAFLSLQR                | 459  | 22 | 6  | 36.48  | y4*y4y5y6y8y22                         | 2431.23 | 119.911 | 14129  | 2 | 1216.12 | 3.21   |
| Q86UX7 URP2_HUMAN Fermitin family<br>homolog 3 | 15 |                                                     | YYSFFDLDPK                            | 252  | 10 | 4  | 26.21  | b5°b5b8y7                              | 1294.62 | 83.966  | 23755  | 2 | 647.81  | 12.73  |
| Q86UX7 URP2_HUMAN Fermitin family<br>homolog 3 | 16 |                                                     | SQDEAPGDPIQLNLK                       | 389  | 16 | 4  | 24.99  | b5*b5b6b11                             | 1752.90 | 29.256  | 16529  | 2 | 876.95  | 11.84  |
| Q86UX7 URP2_HUMAN Fermitin family<br>homolog 3 | 17 | Carbamidomethyl+C(5)                                | WMAGCR                                | 447  | 6  | 3  | 39.26  | b3y4y5                                 | 780.33  | 30.099  | 8800   | 2 | 390.67  | 5.79   |
| Q86UX7 URP2_HUMAN Fermitin family<br>homolog 3 | 18 | Carbamidomethyl+C(15)                               | GMPAHFSDSAQTEACYHMLSRPQ<br>PPDPDLLQR  | 179  | 33 | 3  | 10.95  | b14y4y22                               | 3747.80 | 69.380  | 8683   | 3 | 1249.94 | 5.02   |
| Q86UX7 URP2_HUMAN Fermitin family<br>homolog 3 | 19 |                                                     | QWLLQTHWTLDK                          | 70   | 12 | 4  | 33.32  | b3y7y8y10                              | 1568.81 | 45.084  | 7409   | 3 | 523.61  | -9.57  |
| Q86UX7 URP2_HUMAN Fermitin family<br>homolog 3 | 20 |                                                     | FIQAWQSLPDFGISYVMVR                   | 542  | 19 | 3  | 14.47  | b8b14y8                                | 2257.12 | 121.924 | 6406   | 3 | 753.04  | -14.17 |
| Q86UX7 URP2_HUMAN Fermitin family<br>homolog 3 | 21 |                                                     | TASGDYIDSSWELR                        | 5    | 14 | 7  | 59.27  | b7b13°b13y7y8y9y10                     | 1599.74 | 92.787  | 5748   | 2 | 800.38  | 9.46   |
| Q86UX7 URP2_HUMAN Fermitin family<br>homolog 3 | 22 |                                                     | QDWSDHAIWWEQK                         | 56   | 13 | 6  | 20.02  | b10°b10y7*y7y10*y10                    | 1728.78 | 42.236  | 4659   | 2 | 864.90  | 4.66   |
| Q86UX7 URP2_HUMAN Fermitin family<br>homolog 3 | 23 |                                                     | QWNVNWDIR                             | 598  | 9  | 3  | 29.76  | b3b6y5                                 | 1230.58 | 40.179  | 3175   | 1 | 1230.58 | -19.94 |
| Q86UX7 URP2_HUMAN Fermitin family<br>homolog 3 | 24 |                                                     | ETTLSYYK                              | 381  | 8  | 4  | 35.35  | b6°b6y3y7                              | 1004.48 | 41.038  | 2962   | 2 | 502.75  | -8.81  |
| Q86UX7 URP2_HUMAN Fermitin family<br>homolog 3 | 25 |                                                     | WLDSSR                                | 228  | 6  | 1  | 13.37  | b5                                     | 763.37  | 42.262  | 1966   | 1 | 763.37  | -10.15 |
| Q86UX7 URP2_HUMAN Fermitin family<br>homolog 3 | 26 |                                                     | VFVGEEDPEAESVTLRVTGESHIG<br>GVLLK     | 19   | 29 | 3  | 17.28  | b5b7b13                                | 3067.61 | 112.817 | 98190  | 4 | 767.66  | 4.38   |
| Q86UX7 URP2_HUMAN Fermitin family<br>homolog 3 | 27 |                                                     | LPRPSSLSDKTQLHSR                      | 212  | 16 | 3  | 16.61  | b9y5y9                                 | 1821.97 | 36.315  | 46181  | 4 | 456.25  | -14.27 |

|                                             |    |                      |                         |     |    |    |        |                                               |         |         |        |   |         |        |
|---------------------------------------------|----|----------------------|-------------------------|-----|----|----|--------|-----------------------------------------------|---------|---------|--------|---|---------|--------|
| Q86UX7 URP2_HUMAN Fermitin family homolog 3 | 28 | Carbamidomethyl+C(7) | WLDSSRCLMQGIK           | 228 | 14 | 3  | 18.69  | b9y3y13                                       | 1721.83 | 97.234  | 33771  | 2 | 861.42  | -9.71  |
| Q86UX7 URP2_HUMAN Fermitin family homolog 3 | 29 |                      | ARGEELDEDLFLQLTGGHEAF   | 646 | 21 | 9  | 59.95  | b5b10b11b12y5y7y9*y9y13                       | 2347.12 | 94.461  | 16258  | 3 | 783.04  | -1.66  |
| Q86UX7 URP2_HUMAN Fermitin family homolog 3 | 30 |                      | TQLHSRWLDSSR            | 222 | 12 | 3  | 31.84  | b4b7b11                                       | 1485.77 | 61.477  | 9812   | 2 | 743.39  | 10.19  |
| Q86UX7 URP2_HUMAN Fermitin family homolog 3 | 31 |                      | YYSFFDLDPKTPVR          | 252 | 15 | 3  | 23.59  | b13b14y3                                      | 1862.91 | 68.816  | 8435   | 2 | 931.96  | 9.04   |
| Q86UX7 URP2_HUMAN Fermitin family homolog 3 | 32 |                      | FKYYSFFDLDPK            | 250 | 12 | 3  | 28.83  | b3b4b10                                       | 1569.77 | 61.211  | 7830   | 3 | 523.93  | 2.10   |
| Q86UX7 URP2_HUMAN Fermitin family homolog 3 | 33 |                      | FSNMRQWNVNWDIR          | 593 | 14 | 6  | 30.66  | b8y5*y5y7*y7y13                               | 1865.87 | 68.733  | 7359   | 2 | 933.44  | -6.61  |
| Q86UX7 URP2_HUMAN Fermitin family homolog 3 | 34 |                      | ETTLSYYKSQDEAPGDPIQLNLK | 381 | 24 | 5  | 27.69  | b3b5b6b8*b8                                   | 2738.38 | 110.587 | 4656   | 3 | 913.46  | 8.83   |
| Q86UX7 URP2_HUMAN Fermitin family homolog 3 | 35 |                      | AGMKTASGDYIDSSWELR      | 1   | 18 | 4  | 22.49  | b7*b7y7y8                                     | 1986.92 | 114.833 | 1743   | 2 | 993.97  | 1.17   |
| Q86UX7 URP2_HUMAN Fermitin family homolog 3 | 36 | Phosphoryl STY(14)   | LEGSAPTDVLDLSTTIPELK    | 333 | 20 | 7  | 41.14  | b5b7b10b13b14y11*y11                          | 2179.07 | 65.245  | 5241   | 2 | 1090.04 | 2.02   |
| Q86UX7 URP2_HUMAN Fermitin family homolog 3 | 37 | Carbamidomethyl+C(8) | FQAVAAICR               | 120 | 9  | 1  | 7.26   | b3                                            | 1035.53 | 91.182  | 8185   | 2 | 518.27  | -14.50 |
| Q86UX7 URP2_HUMAN Fermitin family homolog 3 | 38 |                      | PHGPDASAEGLNPYGLVAPR    | 490 | 20 | 0  | 10.33  |                                               | 2018.00 | 58.986  | 2479   | 3 | 673.34  | -5.69  |
| P06753 TPM3_HUMAN Tropomyosin alpha-3 chain | 1  |                      | IQLVEEELDR              | 91  | 10 | 19 | 112.61 | b2*b2b3b4y1y2y3y4*y4y5*y5y6*y6y7y8y9*y9*y9y10 | 1243.65 | 58.792  | 415495 | 2 | 622.33  | -0.39  |
| P06753 TPM3_HUMAN Tropomyosin alpha-3 chain | 2  |                      | AADAEAEVASLNRR          | 77  | 14 | 5  | 27.26  | b1y7y9y11y14                                  | 1472.73 | 37.871  | 80886  | 3 | 491.58  | -11.44 |
| P06753 TPM3_HUMAN Tropomyosin alpha-3 chain | 3  |                      | MELQEIQLK               | 140 | 9  | 5  | 22.83  | b2y4y6*y7y9                                   | 1131.61 | 60.260  | 42085  | 2 | 566.31  | 0.32   |
| P06753 TPM3_HUMAN Tropomyosin alpha-3 chain | 4  |                      | LATALQK                 | 105 | 7  | 11 | 65.57  | b3*b3b4y3y5*y5*y5y6*y6*y6y7                   | 744.45  | 27.845  | 32670  | 2 | 372.73  | -14.51 |
| P06753 TPM3_HUMAN Tropomyosin alpha-3 chain | 5  |                      | QLEDELAAMQK             | 37  | 11 | 5  | 30.62  | y2y7y9y10y11                                  | 1275.63 | 50.014  | 6489   | 2 | 638.32  | 6.41   |
| P06753 TPM3_HUMAN Tropomyosin alpha-3 chain | 6  | Carbamidomethyl+C(1) | CSELEEEELK              | 189 | 9  | 5  | 53.49  | b3b4b5*b5b8                                   | 1136.54 | 92.036  | 178561 | 2 | 568.77  | 22.23  |
| P06753 TPM3_HUMAN Tropomyosin alpha-3 chain | 7  |                      | LELAEK                  | 70  | 6  | 1  | 13.37  | b4                                            | 702.41  | 37.602  | 15422  | 1 | 702.41  | 11.99  |
| P06753 TPM3_HUMAN Tropomyosin alpha-3 chain | 8  |                      | YEEEEIK                 | 220 | 6  | 1  | 13.37  | y5                                            | 810.39  | 24.940  | 14354  | 2 | 405.70  | -1.73  |
| P06753 TPM3_HUMAN Tropomyosin alpha-3 chain | 9  |                      | YSEALK                  | 59  | 6  | 3  | 29.33  | b3b5*b5                                       | 710.37  | 37.635  | 9142   | 1 | 710.37  | 0.77   |
| P06753 TPM3_HUMAN Tropomyosin alpha-3 chain | 10 |                      | QAEER                   | 30  | 5  | 1  | 12.94  | y4                                            | 632.31  | 34.649  | 3889   | 1 | 632.31  | 11.58  |
| P06753 TPM3_HUMAN Tropomyosin alpha-3 chain | 11 |                      | TIDDLEDELYAQK           | 251 | 13 | 4  | 20.02  | b4b9*b9y12                                    | 1552.76 | 92.796  | 2156   | 2 | 776.88  | 13.13  |
| P06753 TPM3_HUMAN Tropomyosin alpha-3 chain | 12 |                      | HIAEEADR                | 152 | 8  | 3  | 35.35  | b4b7y7                                        | 940.45  | 116.017 | 1608   | 1 | 940.45  | 1.88   |
| P06753 TPM3_HUMAN Tropomyosin alpha-3 chain | 13 |                      | SKQLEDELAAMQK           | 35  | 13 | 6  | 31.41  | b7b8*b8b10y11*y11                             | 1490.77 | 80.626  | 45295  | 2 | 745.89  | 12.53  |
| P06753 TPM3_HUMAN Tropomyosin alpha-3 chain | 14 |                      | YKAISELDHALNDMTSI       | 266 | 18 | 4  | 24.05  | b9b11b14y15                                   | 2049.99 | 70.584  | 6283   | 3 | 684.00  | 7.15   |
| P06753 TPM3_HUMAN Tropomyosin alpha-3 chain | 15 |                      | TEERAELAESK             | 178 | 11 | 3  | 23.63  | b4b9y4                                        | 1262.61 | 80.852  | 5980   | 2 | 631.81  | -9.28  |
| P06753 TPM3_HUMAN Tropomyosin alpha-3 chain | 16 |                      | AADAEAEVASLNRR          | 77  | 14 | 3  | 34.25  | y5y6y7                                        | 1472.75 | 34.294  | 4263   | 3 | 491.59  | 2.24   |
| P06753 TPM3_HUMAN Tropomyosin alpha-3 chain | 17 |                      | LKGTEDELDK              | 49  | 10 | 5  | 27.97  | b8*b8y5*y5y6                                  | 1147.58 | 66.112  | 2611   | 2 | 574.30  | 0.64   |
| P06753 TPM3_HUMAN Tropomyosin alpha-3 chain | 18 | Carbamidomethyl+C(1) | CSELEEEELKNVTNNLK       | 189 | 16 | 8  | 58.75  | b3b9*b9b11*b11b13b15y14                       | 1919.94 | 63.028  | 2218   | 3 | 640.65  | -1.40  |

|                                                      |    |                      |                             |     |    |    |        |                                               |         |         |        |   |         |        |
|------------------------------------------------------|----|----------------------|-----------------------------|-----|----|----|--------|-----------------------------------------------|---------|---------|--------|---|---------|--------|
| [P06753]TPM3_HUMAN Tropomyosin alpha-3 chain         | 19 |                      | GTEDELDKYSEALK              | 51  | 14 | 3  | 26.47  | b7b9b10                                       | 1597.75 | 39.281  | 2178   | 2 | 799.38  | -6.57  |
| [P06753]TPM3_HUMAN Tropomyosin alpha-3 chain         | 20 |                      | AEEVAVSLNRR                 | 80  | 11 | 0  | 3.87   |                                               | 1215.63 | 37.852  | 4590   | 2 | 608.32  | -8.33  |
| [P06753]TPM3_HUMAN Tropomyosin alpha-3 chain         | 21 |                      | AEVAVSLNRR                  | 82  | 9  | 0  | 3.87   |                                               | 1015.55 | 37.869  | 1948   | 2 | 508.28  | -9.98  |
| [P06753]TPM3_HUMAN Tropomyosin alpha-3 chain         | 22 |                      | AADAEAEVAVSLNRR             | 77  | 14 | 0  | 3.87   |                                               | 1454.72 | 37.874  | 12419  | 3 | 485.58  | -7.30  |
| [P07951]TPM2_HUMAN Tropomyosin beta chain            | 1  |                      | IQLVEEELDR                  | 91  | 10 | 19 | 112.61 | b2*b2b3b4y1y2y3y4°y4y5°y5y6°y6y7y8y9°y9*y9y10 | 1243.65 | 58.792  | 415495 | 2 | 622.33  | -0.39  |
| [P07951]TPM2_HUMAN Tropomyosin beta chain            | 2  |                      | LVILEGELER                  | 168 | 10 | 4  | 27.97  | b2b3y7y8                                      | 1170.67 | 66.656  | 40190  | 2 | 585.84  | -1.46  |
| [P07951]TPM2_HUMAN Tropomyosin beta chain            | 3  |                      | LATALQK                     | 105 | 7  | 11 | 65.57  | b3°b3b4y3y5°y5*y5y6°y6*y6y7                   | 744.45  | 27.845  | 32670  | 2 | 372.73  | -14.51 |
| [P07951]TPM2_HUMAN Tropomyosin beta chain            | 4  |                      | AISEELDNALNDITSL            | 268 | 16 | 4  | 16.61  | b3°b3y6y9                                     | 1717.84 | 94.410  | 3419   | 2 | 859.43  | -2.70  |
| [P07951]TPM2_HUMAN Tropomyosin beta chain            | 5  |                      | QLEEEQALQK                  | 37  | 11 | 5  | 23.63  | b6°b6b8y8*y8                                  | 1343.71 | 53.781  | 7537   | 2 | 672.36  | 19.53  |
| [P07951]TPM2_HUMAN Tropomyosin beta chain            | 6  |                      | ATDAEADVAVSLNR              | 77  | 13 | 5  | 20.02  | b11y8y12°y12*y12                              | 1332.63 | 51.126  | 6681   | 2 | 666.82  | -4.31  |
| [P07951]TPM2_HUMAN Tropomyosin beta chain            | 7  |                      | SEERA EVAESK                | 178 | 11 | 4  | 35.39  | y6y8y10°y10                                   | 1234.59 | 75.591  | 3755   | 2 | 617.80  | -1.38  |
| [P04075]ALDOA_HUMAN Fructose-bisphosphate aldolase A | 1  | Carbamidomethyl+C(5) | YASICQNGIVPIVEPEILPDGDHDLKR | 173 | 28 | 16 | 88.24  | b9b10b11°b11*b11y2y3y5y7y9y10y13°y13y14y17y28 | 3176.59 | 75.610  | 97255  | 4 | 794.90  | -3.15  |
| [P04075]ALDOA_HUMAN Fructose-bisphosphate aldolase A | 2  |                      | IGEHTPSALAIMENANVLAR        | 153 | 20 | 13 | 76.68  | b4b5b8°b8b10y2y3y5y6y8y10y15y20               | 2107.09 | 80.215  | 92125  | 3 | 703.03  | -5.45  |
| [P04075]ALDOA_HUMAN Fructose-bisphosphate aldolase A | 3  |                      | LQSIGTENTEENRR              | 43  | 14 | 7  | 18.69  | b2°b2b8y3*y3y12y14                            | 1646.79 | 28.320  | 49906  | 3 | 549.60  | -9.71  |
| [P04075]ALDOA_HUMAN Fructose-bisphosphate aldolase A | 4  |                      | GVVPLAGTNGETTQGLDGLSER      | 111 | 23 | 5  | 16.84  | b3b15y6y17y23                                 | 2272.17 | 64.723  | 44180  | 2 | 1136.59 | 10.53  |
| [P04075]ALDOA_HUMAN Fructose-bisphosphate aldolase A | 5  |                      | GILAADESTGSIK               | 28  | 14 | 8  | 51.26  | b4y1y9y10y11y12°y12y14                        | 1332.70 | 48.064  | 43082  | 2 | 666.86  | 1.74   |
| [P04075]ALDOA_HUMAN Fructose-bisphosphate aldolase A | 6  |                      | ALQASALK                    | 304 | 8  | 6  | 50.05  | b3b6y2y4y5y8                                  | 801.48  | 32.101  | 23986  | 2 | 401.24  | -2.44  |
| [P04075]ALDOA_HUMAN Fructose-bisphosphate aldolase A | 7  |                      | AAQEEYVKR                   | 322 | 9  | 6  | 53.49  | y2y3y4y5y6y9                                  | 1093.56 | 19.115  | 14027  | 2 | 547.28  | -1.23  |
| [P04075]ALDOA_HUMAN Fructose-bisphosphate aldolase A | 8  |                      | LQSIGTENTEENR               | 43  | 13 | 3  | 24.79  | b5b6y3                                        | 1490.73 | 35.029  | 10840  | 2 | 745.87  | 17.85  |
| [P04075]ALDOA_HUMAN Fructose-bisphosphate aldolase A | 9  |                      | YTPSGQAGAAASESLFVSNHAY      | 342 | 22 | 7  | 24.65  | b3b12y3y7°y7*y7y10                            | 2228.03 | 65.284  | 4984   | 2 | 1114.52 | 2.08   |
| [P04075]ALDOA_HUMAN Fructose-bisphosphate aldolase A | 10 |                      | FSHEELAMATVTALR             | 243 | 15 | 5  | 25.65  | b3°b3b8b13°b13                                | 1675.83 | 105.511 | 4667   | 3 | 559.28  | -10.63 |
| [P04075]ALDOA_HUMAN Fructose-bisphosphate aldolase A | 11 |                      | VDKGVVPLAGTNGETTQGLDGLSER   | 108 | 26 | 7  | 51.99  | b4b5b6y5y10y12y14                             | 2614.34 | 60.449  | 39981  | 3 | 872.12  | 2.61   |
| [P04075]ALDOA_HUMAN Fructose-bisphosphate aldolase A | 12 |                      | LQSIGTENTEENRR              | 43  | 14 | 4  | 24.13  | b10y11y12*y12                                 | 1646.81 | 55.042  | 4235   | 3 | 549.61  | 0.15   |
| [P04075]ALDOA_HUMAN Fructose-bisphosphate aldolase A | 13 | Carbamidomethyl+C(2) | RCQYVTEK                    | 200 | 8  | 4  | 40.12  | b3b4b6°b6                                     | 1083.53 | 81.460  | 3541   | 2 | 542.27  | 7.21   |
| [P04075]ALDOA_HUMAN Fructose-bisphosphate aldolase A | 14 |                      | KDGADFAK                    | 139 | 8  | 5  | 48.29  | b4b5b7y7°y7                                   | 851.42  | 42.253  | 2068   | 1 | 851.42  | -1.00  |
| [P04075]ALDOA_HUMAN Fructose-bisphosphate aldolase A | 15 | Phosphoryl STY(8)    | GVVPLAGTNGETTQGLDGLSER      | 111 | 23 | 6  | 32.71  | b8b10y8y9y11y14_H3PO4 y14_HPO3 y14            | 2352.13 | 106.103 | 3610   | 3 | 784.72  | 14.43  |
| [P04075]ALDOA_HUMAN Fructose-bisphosphate aldolase A | 16 | Oxidation+M(1)       | MPYQYPALTPEQK               | 0   | 13 | 6  | 28.77  | b10°b10b12y5*y5y9                             | 1581.74 | 92.809  | 3457   | 2 | 791.37  | -13.89 |

|                                                      |    |                                       |                               |     |    |    |        |                                          |         |         |        |   |         |        |
|------------------------------------------------------|----|---------------------------------------|-------------------------------|-----|----|----|--------|------------------------------------------|---------|---------|--------|---|---------|--------|
| [P04075]ALDOA_HUMAN Fructose-bisphosphate aldolase A | 17 | Carbamidomethyl+C(25);Oxidation+M(18) | ALSDHHIYLEGTLTKPNMVTDPGHACTQK | 215 | 28 | 3  | 11.47  | b6y5y12                                  | 3147.53 | 123.788 | 1668   | 3 | 1049.85 | -11.87 |
| [P04075]ALDOA_HUMAN Fructose-bisphosphate aldolase A | 18 |                                       | QEEYVKKR                      | 324 | 7  | 0  | 1.72   |                                          | 951.49  | 19.111  | 5233   | 2 | 476.25  | -1.28  |
| [P04075]ALDOA_HUMAN Fructose-bisphosphate aldolase A | 19 |                                       | AQEEYVKKR                     | 323 | 8  | 0  | 1.72   |                                          | 1022.53 | 19.119  | 4623   | 2 | 511.77  | 4.18   |
| [P04075]ALDOA_HUMAN Fructose-bisphosphate aldolase A | 20 |                                       | SIGTENTEENRR                  | 45  | 12 | 0  | 3.87   |                                          | 1405.67 | 28.336  | 3350   | 2 | 703.34  | 2.69   |
| [P02671]FIBA_HUMAN Fibrinogen alpha chain            | 1  |                                       | GLIDEVNDQDFTNR                | 71  | 13 | 15 | 110.89 | b5°b5y2y3*y3y4°y4*y4y5y7y8y9y10y11y13    | 1520.74 | 68.990  | 213866 | 2 | 760.87  | 2.65   |
| [P02671]FIBA_HUMAN Fibrinogen alpha chain            | 2  |                                       | MELERPGGNEITR                 | 258 | 13 | 6  | 31.41  | b2b5y7y8y12y13                           | 1501.73 | 41.399  | 163249 | 3 | 501.25  | -7.56  |
| [P02671]FIBA_HUMAN Fibrinogen alpha chain            | 3  |                                       | NSLFEYQK                      | 89  | 8  | 17 | 61.23  | b1*b1b2°b2b3b8y1y2*y2y4°y4*y4y5y6*y6y7y8 | 1028.50 | 50.123  | 82392  | 2 | 514.75  | -8.66  |
| [P02671]FIBA_HUMAN Fibrinogen alpha chain            | 4  |                                       | ALTDMPQMR                     | 249 | 9  | 5  | 37.54  | b1y1y4y5y6                               | 1062.51 | 50.588  | 80422  | 2 | 531.76  | 0.92   |
| [P02671]FIBA_HUMAN Fibrinogen alpha chain            | 5  |                                       | ESSSHHPGIAEFPSR               | 558 | 15 | 12 | 61.18  | b6°b6b9°b9b11°b11b15y3y4y5y9y15          | 1637.76 | 38.346  | 45203  | 3 | 546.59  | -5.81  |
| [P02671]FIBA_HUMAN Fibrinogen alpha chain            | 6  |                                       | EVDLKDYEDQQK                  | 190 | 12 | 15 | 122.89 | b3b4b6b7°b7b9°b9y2*y2y4y5y6y7y8y12       | 1509.71 | 40.214  | 41561  | 2 | 755.36  | 3.88   |
| [P02671]FIBA_HUMAN Fibrinogen alpha chain            | 7  |                                       | TFPGFFSPMLGEFVSETESR          | 527 | 20 | 8  | 39.96  | b2y4y6y7°y7y11y18y20                     | 2265.06 | 108.996 | 40976  | 2 | 1133.04 | 4.20   |
| [P02671]FIBA_HUMAN Fibrinogen alpha chain            | 8  |                                       | MADEAGSEADHEGTHSTK            | 602 | 18 | 14 | 109.11 | b2b3y2y3y6°y6y7y8y9y13y14y15y16°y16      | 1872.74 | 16.211  | 34161  | 4 | 468.94  | -11.60 |
| [P02671]FIBA_HUMAN Fibrinogen alpha chain            | 9  |                                       | TVIGPDGHKEVTK                 | 467 | 13 | 11 | 91.03  | b2°b2y2y3y4y7y8°y8y9y10y11               | 1380.74 | 23.638  | 30690  | 3 | 460.92  | -7.43  |
| [P02671]FIBA_HUMAN Fibrinogen alpha chain            | 10 |                                       | GGSTSYGTGSETESPR              | 271 | 16 | 11 | 57.34  | b2b3°b3b13y2y3y5y7y10y11y16              | 1572.68 | 24.903  | 22182  | 2 | 786.84  | -0.16  |
| [P02671]FIBA_HUMAN Fibrinogen alpha chain            | 11 |                                       | QFTSSTSYNR                    | 581 | 10 | 6  | 39.15  | b9y5y7y8°y8y10                           | 1190.55 | 28.681  | 7663   | 2 | 595.78  | 2.26   |
| [P02671]FIBA_HUMAN Fibrinogen alpha chain            | 12 |                                       | MADEAGSEADHEGTHSTKR           | 602 | 19 | 9  | 71.4   | b2b3b4y3y7y8y9y14y15                     | 2028.86 | 15.297  | 4134   | 3 | 676.96  | -5.42  |
| [P02671]FIBA_HUMAN Fibrinogen alpha chain            | 13 |                                       | IEVLK                         | 137 | 5  | 2  | 25.88  | b3b4                                     | 601.39  | 60.854  | 36798  | 1 | 601.39  | 3.04   |
| [P02671]FIBA_HUMAN Fibrinogen alpha chain            | 14 | Carbamidomethyl+C(11)                 | EVVTSSEDCPEAMDGLTSLGIGTLDGFR  | 480 | 30 | 5  | 24.32  | b6°b6b7y10y13                            | 3128.40 | 93.685  | 10347  | 4 | 782.85  | -2.50  |
| [P02671]FIBA_HUMAN Fibrinogen alpha chain            | 15 |                                       | DLLPSR                        | 210 | 6  | 4  | 39.26  | b5°b5y3y4                                | 700.40  | 41.739  | 8774   | 1 | 700.40  | 6.45   |
| [P02671]FIBA_HUMAN Fibrinogen alpha chain            | 16 | Carbamidomethyl+C(2)                  | DCDDVLQTHPSGTQSGIFNIK         | 630 | 21 | 5  | 13.46  | b10b12°b12°b12y11                        | 2332.10 | 47.948  | 2298   | 6 | 389.52  | 4.40   |
| [P02671]FIBA_HUMAN Fibrinogen alpha chain            | 17 |                                       | VSEDLR                        | 129 | 6  | 3  | 26.31  | b5°b5y5                                  | 718.37  | 22.709  | 2238   | 2 | 359.69  | -1.95  |
| [P02671]FIBA_HUMAN Fibrinogen alpha chain            | 18 |                                       | NPSSAGSWNSGSSGPGSTGNR         | 287 | 21 | 4  | 20.1   | y5*y5y8y10                               | 1963.84 | 101.736 | 2109   | 4 | 491.72  | -2.30  |
| [P02671]FIBA_HUMAN Fibrinogen alpha chain            | 19 |                                       | GSESGIFTNTK                   | 547 | 11 | 4  | 34.35  | b6b9y4y6                                 | 1140.55 | 104.421 | 2009   | 1 | 1140.55 | 1.07   |
| [P02671]FIBA_HUMAN Fibrinogen alpha chain            | 20 |                                       | HPDEAAFFDASTGK                | 512 | 15 | 4  | 17.57  | b6y10°y10y14                             | 1593.71 | 49.917  | 1941   | 2 | 797.36  | -5.97  |
| [P02671]FIBA_HUMAN Fibrinogen alpha chain            | 21 |                                       | SSSYKQFTSSTSYNR               | 575 | 16 | 4  | 26.85  | b13y9y11y13                              | 1829.85 | 60.505  | 59014  | 2 | 915.43  | 9.61   |
| [P02671]FIBA_HUMAN Fibrinogen alpha chain            | 22 |                                       | MKGLIDEVNDQDFTNR              | 69  | 15 | 7  | 46.18  | b8b10y3y4*y4y6y12                        | 1779.87 | 66.164  | 17165  | 3 | 593.96  | -1.92  |
| [P02671]FIBA_HUMAN Fibrinogen alpha chain            | 23 |                                       | NNSPYEIENGVVVVSFRGADYSYLR     | 830 | 24 | 4  | 22.81  | b3b11b12y9                               | 2772.32 | 118.200 | 9402   | 3 | 924.78  | -8.10  |



|                                           |    |                                           |                                        |     |    |    |       |                                                          |         |         |       |   |         |        |
|-------------------------------------------|----|-------------------------------------------|----------------------------------------|-----|----|----|-------|----------------------------------------------------------|---------|---------|-------|---|---------|--------|
| [P02671 FIBA_HUMAN Fibrinogen alpha chain | 24 |                                           | QFTSSTSYNRGDSTFESK                     | 581 | 18 | 8  | 39.49 | b7b9b12*b12b13y4y9*y9                                    | 2041.92 | 64.331  | 3680  | 2 | 1021.46 | 5.56   |
| [P02671 FIBA_HUMAN Fibrinogen alpha chain | 25 |                                           | ESSSHHPGIAEFPSRGK                      | 558 | 17 | 5  | 26.6  | b12b13b15*b15y13                                         | 1822.87 | 75.521  | 3584  | 2 | 911.94  | -7.77  |
| [P02671 FIBA_HUMAN Fibrinogen alpha chain | 26 |                                           | DNTYNRVSEDLR                           | 123 | 12 | 4  | 21.63 | b8*b8y5y10                                               | 1481.72 | 98.511  | 1886  | 2 | 741.36  | 14.58  |
| [P02671 FIBA_HUMAN Fibrinogen alpha chain | 27 |                                           | GSVLRVELEDWAGNEAYAEYHFR                | 720 | 23 | 4  | 21.72 | b14y5y6*y6                                               | 2711.25 | 121.204 | 1694  | 3 | 904.42  | -13.87 |
| [P02671 FIBA_HUMAN Fibrinogen alpha chain | 28 |                                           | GSESGIFTNTKESSSHHPGIAEFPSR             | 547 | 26 | 8  | 35.88 | b3b10b14y4y6y13*y13y14                                   | 2759.30 | 114.872 | 1551  | 3 | 920.44  | -0.09  |
| [P02671 FIBA_HUMAN Fibrinogen alpha chain | 29 | Phosphoryl STY(9)                         | VTSGSTTTTRR                            | 448 | 11 | 6  | 51.27 | b5b8_HPO3<br>b8y3_H3PO4<br>y3*y3y5_H3PO4<br>y5y9_HPO3 y9 | 1246.58 | 42.225  | 13993 | 2 | 623.79  | 7.05   |
| [P02671 FIBA_HUMAN Fibrinogen alpha chain | 30 | Phosphoryl STY(13)                        | GSESGIFTNTKESSSHHPGIAEFPSR             | 547 | 26 | 3  | 22.52 | b5b11b12                                                 | 2839.23 | 72.454  | 4016  | 4 | 710.56  | -11.52 |
| [P02671 FIBA_HUMAN Fibrinogen alpha chain | 31 | Carbamidomethyl+C(15)<br>;Oxidation+M(19) | EVTKEVVTSEDGSDCPEAMDLGT<br>LSGIGTLDGFR | 476 | 34 | 4  | 12.7  | b11b16y5y10                                              | 3601.70 | 91.981  | 10205 | 3 | 1201.24 | 14.64  |
| [P02671 FIBA_HUMAN Fibrinogen alpha chain | 32 | Oxidation+M(1)                            | MELERPGGNEITR                          | 258 | 13 | 4  | 24.79 | b6*b6b7y7                                                | 1517.73 | 136.522 | 4708  | 1 | 1517.73 | -7.72  |
| [P02671 FIBA_HUMAN Fibrinogen alpha chain | 33 |                                           | IGPDGHKEVTK                            | 469 | 11 | 1  | 7.35  | b9                                                       | 1180.63 | 23.650  | 20105 | 2 | 590.82  | -0.83  |
| [P02671 FIBA_HUMAN Fibrinogen alpha chain | 34 |                                           | GPDGHKEVTK                             | 470 | 10 | 3  | 29.26 | b3b5b9                                                   | 1067.54 | 23.653  | 11610 | 2 | 534.28  | -4.23  |
| [P02671 FIBA_HUMAN Fibrinogen alpha chain | 35 |                                           | LERPGGNEITR                            | 260 | 11 | 0  | 3.44  |                                                          | 1241.67 | 41.443  | 3707  | 2 | 621.34  | 9.73   |
| [P02671 FIBA_HUMAN Fibrinogen alpha chain | 36 |                                           | GSEADHEGHTHSTKR                        | 607 | 14 | 2  | 12.99 | b3b5                                                     | 1511.67 | 15.298  | 1595  | 3 | 504.56  | -6.62  |
| [P02671 FIBA_HUMAN Fibrinogen alpha chain | 37 |                                           | NSLFEYQK                               | 89  | 8  | 0  | 1.29  |                                                          | 1011.48 | 50.094  | 2441  | 2 | 506.24  | 4.59   |
| [P06733 ENO_A_HUMAN Alpha-enolase         | 1  |                                           | HIADLAGNSEVILPVPFNVINGGS<br>HAGNK      | 132 | 30 | 10 | 45.24 | b5b6b11b12*b12y2y7y15y17y30                              | 3011.54 | 84.180  | 50163 | 4 | 753.64  | -9.24  |
| [P06733 ENO_A_HUMAN Alpha-enolase         | 2  | Carbamidomethyl+C(14)                     | VNQGIVTESLQACK                         | 343 | 15 | 10 | 50.16 | b4b14*b14b15y4y9*y9y10y11y15                             | 1633.82 | 54.011  | 46943 | 2 | 817.41  | 0.52   |
| [P06733 ENO_A_HUMAN Alpha-enolase         | 3  |                                           | LAMQEFMILPVGAANFR                      | 162 | 17 | 8  | 53.83 | b5b6y2y6y7y8y13y17                                       | 1907.99 | 99.872  | 39570 | 2 | 954.50  | 1.54   |
| [P06733 ENO_A_HUMAN Alpha-enolase         | 4  |                                           | GNPTVEVDLFTSK                          | 15  | 13 | 12 | 44.35 | b3b6*b6b7*b7b9*b9*b9<br>b13y8*y8y13                      | 1406.72 | 67.661  | 38695 | 2 | 703.86  | 2.26   |
| [P06733 ENO_A_HUMAN Alpha-enolase         | 5  |                                           | DATNVGDEGGFAPNILENKEGLEL<br>LK         | 202 | 26 | 9  | 44.04 | b2b3b4b5*b5y3y14y21y26                                   | 2743.37 | 84.122  | 34514 | 3 | 915.13  | -1.78  |
| [P06733 ENO_A_HUMAN Alpha-enolase         | 6  |                                           | SFIKDYPVVSIEDPFDQDDWGAW<br>QK          | 281 | 25 | 10 | 53.07 | b6b13y2y5y6*y6y7y8y12y25                                 | 2985.39 | 94.967  | 33405 | 3 | 995.80  | -0.25  |
| [P06733 ENO_A_HUMAN Alpha-enolase         | 7  |                                           | AAVPSGASTGIYEALELR                     | 32  | 18 | 5  | 15.09 | b8*b8b12y10y18                                           | 1804.95 | 77.954  | 29301 | 2 | 902.98  | 4.67   |
| [P06733 ENO_A_HUMAN Alpha-enolase         | 8  |                                           | DATNVGDEGGFAPNILENK                    | 202 | 19 | 4  | 14.47 | b6*b6b13y9                                               | 1960.90 | 53.768  | 21981 | 3 | 654.30  | -13.20 |
| [P06733 ENO_A_HUMAN Alpha-enolase         | 9  |                                           | IGAEVYHNLK                             | 183 | 10 | 6  | 50.91 | y3*y3y4y5y7y10                                           | 1143.62 | 38.787  | 14967 | 2 | 572.31  | 0.00   |
| [P06733 ENO_A_HUMAN Alpha-enolase         | 10 |                                           | YGKDATNVGDEGGFAPNILENK                 | 199 | 22 | 4  | 19.56 | b5b8*b8b10                                               | 2309.07 | 41.608  | 11822 | 3 | 770.36  | -13.53 |
| [P06733 ENO_A_HUMAN Alpha-enolase         | 11 |                                           | DYPVVSIEDPFDQDDWGAWQK                  | 285 | 21 | 6  | 37.23 | b4b5y4y5y7y21                                            | 2510.13 | 95.737  | 8127  | 2 | 1255.57 | 6.61   |
| [P06733 ENO_A_HUMAN Alpha-enolase         | 12 |                                           | FTASAGIQVVGDDLTVTNPK                   | 306 | 20 | 3  | 13.93 | b6b9y6                                                   | 2033.05 | 60.318  | 7914  | 3 | 678.36  | -1.32  |
| [P06733 ENO_A_HUMAN Alpha-enolase         | 13 |                                           | NPLAK                                  | 429 | 5  | 3  | 25.88 | b3b4*b4                                                  | 542.33  | 60.835  | 89823 | 1 | 542.33  | -3.38  |
| [P06733 ENO_A_HUMAN Alpha-enolase         | 14 |                                           | YISPDQLADLYK                           | 269 | 12 | 3  | 21.63 | b6y5y10                                                  | 1425.73 | 72.723  | 69150 | 2 | 713.37  | -0.34  |

|                                 |    |                                                                                                                               |                                               |     |    |    |       |                                               |         |         |        |   |         |        |
|---------------------------------|----|-------------------------------------------------------------------------------------------------------------------------------|-----------------------------------------------|-----|----|----|-------|-----------------------------------------------|---------|---------|--------|---|---------|--------|
| P06733 ENOA_HUMAN Alpha-enolase | 15 |                                                                                                                               | YDLDFK                                        | 256 | 6  | 3  | 26.31 | y4y5°y5                                       | 800.37  | 53.915  | 48479  | 2 | 400.69  | -11.97 |
| P06733 ENOA_HUMAN Alpha-enolase | 16 |                                                                                                                               | LAQANGWGVMSHR                                 | 358 | 14 | 6  | 58.97 | b9y3y5y7y11y12                                | 1525.74 | 54.805  | 30529  | 3 | 509.25  | -21.04 |
| P06733 ENOA_HUMAN Alpha-enolase | 17 |                                                                                                                               | EIFDSR                                        | 9   | 6  | 2  | 13.37 | y4°y4                                         | 766.36  | 25.785  | 1863   | 1 | 766.36  | -11.47 |
| P06733 ENOA_HUMAN Alpha-enolase | 18 |                                                                                                                               | KLNVTEQEK                                     | 80  | 9  | 4  | 37.54 | y3y4y5*y5                                     | 1088.60 | 20.922  | 5183   | 2 | 544.80  | 1.79   |
| P06733 ENOA_HUMAN Alpha-enolase | 19 |                                                                                                                               | AGYTDKVVIGMDVAASEFFR                          | 233 | 20 | 3  | 13.93 | b7b13y7                                       | 2176.07 | 94.540  | 3665   | 4 | 544.77  | -1.46  |
| P06733 ENOA_HUMAN Alpha-enolase | 20 | Phosphoryl STY(12)                                                                                                            | AAVPSGASTGIYEALERLNDK                         | 32  | 22 | 7  | 28.01 | b9°b9b10b12_H3PO4<br>b12_HPO3<br>b12y4y10°y10 | 2357.07 | 58.365  | 3176   | 2 | 1179.04 | -11.19 |
| P06733 ENOA_HUMAN Alpha-enolase | 21 | Oxidation+M(5)                                                                                                                | LMIEMDGTEK                                    | 92  | 11 | 4  | 35.78 | b9y6y7y9                                      | 1296.57 | 43.512  | 12016  | 2 | 648.79  | -4.99  |
| P06733 ENOA_HUMAN Alpha-enolase | 22 | Oxidation+M(5)                                                                                                                | VVIGMDVAASEFFR                                | 239 | 14 | 4  | 29.87 | b8b10b11y8                                    | 1556.79 | 66.720  | 7258   | 2 | 778.90  | 7.61   |
| P06733 ENOA_HUMAN Alpha-enolase | 23 |                                                                                                                               | GGFAPNILENK                                   | 210 | 11 | 1  | 7.95  | b4                                            | 1159.62 | 41.630  | 49100  | 2 | 580.31  | 5.79   |
| P06733 ENOA_HUMAN Alpha-enolase | 24 |                                                                                                                               | GAEVYHNLK                                     | 184 | 9  | 0  | 2.15  |                                               | 1030.53 | 38.754  | 33409  | 2 | 515.77  | -3.55  |
| P06733 ENOA_HUMAN Alpha-enolase | 25 |                                                                                                                               | YGKDATNVGDEG                                  | 199 | 12 | 2  | 7.95  | y11°y11                                       | 1225.53 | 41.619  | 14337  | 2 | 613.27  | -1.39  |
| Q15942 Zyx_HUMAN Zyxin          | 1  | Carbamidomethyl+C(10);<br>Carbamidomethyl+C(13);<br>Carbamidomethyl+C(16);<br>Carbamidomethyl+C(34);<br>Carbamidomethyl+C(37) | ALGQLFHIACTCHQCAQLQGG<br>QFYSLEGAPYCEGCYTTLEK | 399 | 44 | 9  | 49.05 | b3b19b25b26b31y3y11y12y13                     | 5228.32 | 86.741  | 112779 | 4 | 1307.84 | 1.96   |
| Q15942 Zyx_HUMAN Zyxin          | 2  |                                                                                                                               | LGHPEALSAGTGSPPSFTYAQQ<br>R                   | 295 | 25 | 13 | 59.74 | b2b3b4b10b14b15*b15<br>y3*y3y6y11y12y25       | 2597.28 | 56.514  | 104975 | 3 | 866.43  | 4.04   |
| Q15942 Zyx_HUMAN Zyxin          | 3  |                                                                                                                               | VNPFPRGDSEPPAPGAQR                            | 35  | 19 | 12 | 71.4  | b2b10b11*b11y1y5y7y8<br>y9y11y17y19           | 1988.98 | 45.105  | 57894  | 3 | 663.67  | -4.73  |
| Q15942 Zyx_HUMAN Zyxin          | 4  |                                                                                                                               | SPGAPPLTLK                                    | 343 | 11 | 6  | 23.63 | b2b3y2y3y7y11                                 | 1037.59 | 49.697  | 40705  | 2 | 519.30  | -6.24  |
| Q15942 Zyx_HUMAN Zyxin          | 5  | Carbamidomethyl+C(1);<br>Carbamidomethyl+C(4)                                                                                 | CSVCSEPIMPEPRDETVR                            | 503 | 19 | 5  | 21.43 | b1b2y4y7y16                                   | 2218.99 | 49.789  | 38456  | 3 | 740.33  | -1.21  |
| Q15942 Zyx_HUMAN Zyxin          | 6  |                                                                                                                               | GPPASSPAPAK                                   | 253 | 12 | 5  | 43.99 | y1y4y8y9y10                                   | 1076.57 | 22.580  | 28472  | 2 | 538.79  | -1.70  |
| Q15942 Zyx_HUMAN Zyxin          | 7  |                                                                                                                               | FSPGAPGSGSQPNQK                               | 279 | 16 | 14 | 81.85 | b2b5b11b12b16y4y9y10<br>y11*y11y13y14*y14y16  | 1515.72 | 28.395  | 22507  | 2 | 758.36  | 1.69   |
| Q15942 Zyx_HUMAN Zyxin          | 8  | Carbamidomethyl+C(1);<br>Carbamidomethyl+C(4)                                                                                 | CNTCGEPITDR                                   | 443 | 11 | 4  | 30.62 | y5y6y9y11                                     | 1322.55 | 27.475  | 22170  | 2 | 661.78  | 6.28   |
| Q15942 Zyx_HUMAN Zyxin          | 9  |                                                                                                                               | QHPVPPAQNQVR                                  | 328 | 15 | 5  | 17.57 | b4*b4y4y7*y7                                  | 1709.87 | 24.029  | 16484  | 3 | 570.63  | -7.50  |
| Q15942 Zyx_HUMAN Zyxin          | 10 |                                                                                                                               | EVEELEQLTQQLMQDMEHPQR                         | 354 | 21 | 4  | 30.11 | y4y10y13y20                                   | 2611.24 | 100.725 | 71322  | 4 | 653.57  | 11.50  |
| Q15942 Zyx_HUMAN Zyxin          | 11 | Carbamidomethyl+C(1);<br>Carbamidomethyl+C(4);<br>Carbamidomethyl+C(17);<br>Carbamidomethyl+C(26)                             | CEDCGKPLSIEADDNGCFPLDGHV<br>LCR               | 536 | 27 | 3  | 11.65 | b9y6y12                                       | 3134.33 | 68.256  | 32489  | 4 | 784.34  | -3.35  |
| Q15942 Zyx_HUMAN Zyxin          | 12 |                                                                                                                               | QYAPR                                         | 498 | 5  | 1  | 12.94 | b3                                            | 634.32  | 61.381  | 12072  | 1 | 634.32  | -10.30 |
| Q15942 Zyx_HUMAN Zyxin          | 13 | Carbamidomethyl+C(9)                                                                                                          | QNVAVNELCGR                                   | 375 | 11 | 5  | 23.63 | b4y5°y5y7°y7                                  | 1259.60 | 43.571  | 2010   | 2 | 630.30  | -15.80 |
| Q15942 Zyx_HUMAN Zyxin          | 14 |                                                                                                                               | VQEKQHPVPPAQNQVR                              | 324 | 19 | 4  | 30.85 | y3y6y7y11                                     | 2194.12 | 58.855  | 22531  | 3 | 732.05  | -11.24 |
| Q15942 Zyx_HUMAN Zyxin          | 15 |                                                                                                                               | EKVSSIDLEIDSLSLDDMTK                          | 138 | 22 | 3  | 13.05 | b11y4y6                                       | 2438.25 | 73.839  | 4748   | 3 | 813.42  | 12.72  |

|                                            |    |                                                |                                                |     |    |    |        |                                                                |         |         |       |   |         |        |
|--------------------------------------------|----|------------------------------------------------|------------------------------------------------|-----|----|----|--------|----------------------------------------------------------------|---------|---------|-------|---|---------|--------|
| Q15942 ZYG_HUMAN Zyxin                     | 16 | Carbamidomethyl+C(9);<br>Carbamidomethyl+C(12) | QNVAVNELCGRCHQPLAR                             | 375 | 18 | 11 | 59.93  | b4b10*b10b13*b13b14<br>b17*b17y9y11y16                         | 2122.05 | 95.550  | 2532  | 2 | 1061.53 | 2.88   |
| Q15942 ZYG_HUMAN Zyxin                     | 17 | Phosphoryl STY(11)                             | MAAPRPSPAISVSVSAPAFYAPQK                       | 0   | 24 | 6  | 22.72  | b10b12_H3PO4<br>b12y3*y3y7y9                                   | 2523.23 | 103.293 | 7791  | 3 | 841.75  | -1.26  |
| Q15942 ZYG_HUMAN Zyxin                     | 18 | Phosphoryl STY(9)                              | FSPGAPGGSGSQPNQK                               | 279 | 16 | 3  | 23.15  | b6b7y6                                                         | 1595.67 | 97.438  | 3712  | 2 | 798.34  | -1.76  |
| Q15942 ZYG_HUMAN Zyxin                     | 19 |                                                | LGHPEALSAGTGSPPSFTYAQ                          | 295 | 23 | 3  | 12.16  | y4*y4y14                                                       | 2313.13 | 56.511  | 7570  | 3 | 771.71  | 5.38   |
| Q15942 ZYG_HUMAN Zyxin                     | 20 |                                                | LGHPEALSAG                                     | 295 | 10 | 2  | 8.54   | y7*y7                                                          | 951.48  | 56.542  | 4388  | 2 | 476.24  | -10.65 |
| Q15942 ZYG_HUMAN Zyxin                     | 21 |                                                | PPAPGAQR                                       | 45  | 9  | 1  | 7.51   | b8                                                             | 890.48  | 45.133  | 1653  | 2 | 445.74  | -6.37  |
| Q9UBW5 BIN2_HUMAN Bridging<br>integrator 2 | 1  | Carbamidomethyl+C(3)                           | IGCYVTIFQNISNLR                                | 202 | 15 | 14 | 102.44 | b2b3b5b6b7b8b13*b13<br>b14y2y4y8y10y15                         | 1797.93 | 90.779  | 19484 | 2 | 899.47  | 0.61   |
| Q9UBW5 BIN2_HUMAN Bridging<br>integrator 2 | 2  |                                                | ASLGTGTASPR                                    | 449 | 11 | 9  | 34.35  | b2*b2b7b9*b9y6y8*y8y<br>11                                     | 1017.53 | 25.560  | 15512 | 2 | 509.27  | -1.32  |
| Q9UBW5 BIN2_HUMAN Bridging<br>integrator 2 | 3  |                                                | SQEEVLPSSTTPSPGGALSPSQPS<br>SSATEVVLRL         | 356 | 34 | 4  | 10.91  | b12b17y28y34                                                   | 3339.65 | 65.877  | 13115 | 3 | 1113.89 | -0.37  |
| Q9UBW5 BIN2_HUMAN Bridging<br>integrator 2 | 4  |                                                | FEQSASNFYQQAEGHK                               | 42  | 17 | 14 | 43.73  | b1b2*b2b3b4b11y5*y5y<br>7*y10*y10*y10y11*y11                   | 1998.89 | 42.270  | 11975 | 3 | 666.97  | -1.28  |
| Q9UBW5 BIN2_HUMAN Bridging<br>integrator 2 | 5  |                                                | AQTVFEDLNQELLELPILYNSR                         | 179 | 23 | 16 | 57.1   | b2*b2b3*b3b7*b7b9b10<br>b11y2y3*y3y4y7*y7y23                   | 2734.39 | 118.183 | 9682  | 3 | 912.13  | -3.04  |
| Q9UBW5 BIN2_HUMAN Bridging<br>integrator 2 | 6  | Carbamidomethyl+C(14)                          | ENENIHNQNPEELCTSPMLTMSQV<br>ASEPGEAK           | 482 | 32 | 5  | 15.46  | b10y5*y5y7y9                                                   | 3554.62 | 58.154  | 4451  | 3 | 1185.54 | 3.91   |
| Q9UBW5 BIN2_HUMAN Bridging<br>integrator 2 | 7  |                                                | TMEIYVAQFSEIK                                  | 123 | 13 | 4  | 42.2   | b6b9b10b11                                                     | 1558.76 | 68.760  | 48844 | 2 | 779.89  | -11.90 |
| Q9UBW5 BIN2_HUMAN Bridging<br>integrator 2 | 8  |                                                | AIVWNNDDLWEDYEEK                               | 100 | 16 | 5  | 33.67  | b6b10y3y7y9                                                    | 2036.97 | 87.062  | 19829 | 2 | 1018.99 | 5.15   |
| Q9UBW5 BIN2_HUMAN Bridging<br>integrator 2 | 9  |                                                | LVDYDSAR                                       | 145 | 8  | 3  | 40.12  | b3b5b6                                                         | 938.48  | 41.594  | 14253 | 2 | 469.74  | 20.10  |
| Q9UBW5 BIN2_HUMAN Bridging<br>integrator 2 | 10 |                                                | LNHNLYEVMK                                     | 226 | 11 | 8  | 51.27  | b3*b3b8*b8b10y3y8*y8                                           | 1347.70 | 74.679  | 5101  | 1 | 1347.70 | 19.75  |
| Q9UBW5 BIN2_HUMAN Bridging<br>integrator 2 | 11 |                                                | TSLEVSPNPEPEKPVRL                              | 460 | 17 | 7  | 38.08  | b7*b7b11b13b15*b15y1<br>0                                      | 1875.97 | 70.518  | 5054  | 3 | 625.99  | -8.59  |
| Q9UBW5 BIN2_HUMAN Bridging<br>integrator 2 | 12 |                                                | ELLEEEIEIK                                     | 313 | 10 | 5  | 56.86  | b3b6b7b8y5                                                     | 1260.60 | 37.511  | 4338  | 2 | 630.81  | -12.69 |
| Q9UBW5 BIN2_HUMAN Bridging<br>integrator 2 | 13 |                                                | ATASPRPSSGNIPSSPTASGGGSPT<br>SPR               | 421 | 28 | 3  | 11.47  | b15y3y7                                                        | 2581.30 | 75.441  | 3267  | 3 | 861.11  | 16.74  |
| Q9UBW5 BIN2_HUMAN Bridging<br>integrator 2 | 14 |                                                | VMHESSK                                        | 72  | 7  | 6  | 55.64  | b4b5*b5y3y5*y5                                                 | 817.38  | 108.724 | 2335  | 1 | 817.38  | -14.04 |
| Q9UBW5 BIN2_HUMAN Bridging<br>integrator 2 | 15 |                                                | TATVSSPLTSPSTLSLSESES<br>VSATEDLAPDAAQGEDNSEIK | 267 | 46 | 6  | 13.68  | b6*b6b13b37y8*y8                                               | 4635.17 | 120.202 | 6213  | 4 | 1159.55 | -10.74 |
| Q9UBW5 BIN2_HUMAN Bridging<br>integrator 2 | 16 |                                                | RVSETLQEIYSSEWDGHEELK                          | 79  | 21 | 3  | 21.91  | b14y9y10                                                       | 2535.20 | 70.511  | 5833  | 3 | 845.74  | 1.44   |
| Q9UBW5 BIN2_HUMAN Bridging<br>integrator 2 | 17 |                                                | DVFYREMSK                                      | 217 | 9  | 5  | 60.41  | b4y3y4y5y8                                                     | 1174.57 | 90.012  | 2722  | 1 | 1174.57 | 7.90   |
| Q9UBW5 BIN2_HUMAN Bridging<br>integrator 2 | 18 | Carbamidomethyl+C(3)                           | IGCYVTIFQNISNLRDVFYR                           | 202 | 20 | 5  | 23.35  | b6b7*b7b12*b12                                                 | 2478.23 | 121.134 | 1825  | 2 | 1239.62 | -13.30 |
| Q9UBW5 BIN2_HUMAN Bridging<br>integrator 2 | 19 | Carbamidomethyl+C(3);<br>Phosphoryl STY(12)    | IGCYVTIFQNISNLRDVFYR                           | 202 | 20 | 9  | 48.17  | b8_H3PO4<br>b8*b8b10_H3PO4<br>b10b13b18y5*y5y9y10_<br>HPO3 y10 | 2558.19 | 66.074  | 65813 | 4 | 640.30  | -10.88 |
| Q9UBW5 BIN2_HUMAN Bridging<br>integrator 2 | 20 | Carbamidomethyl+C(3);<br>Phosphoryl STY(12)    | IGCYVTIFQNISNLRDVFYREMSK                       | 202 | 24 | 5  | 22.72  | b10b12b14y6y8                                                  | 3033.40 | 76.281  | 4825  | 3 | 1011.80 | -9.82  |
| Q9UBW5 BIN2_HUMAN Bridging<br>integrator 2 | 21 | Phosphoryl STY(12)                             | TATVSSPLTSPSTLSLK                              | 267 | 20 | 3  | 22.06  | b10b11y10                                                      | 2054.99 | 111.769 | 3359  | 3 | 685.67  | -10.93 |

|                                         |    |                                       |                           |     |    |    |        |                                                                                   |         |         |         |   |         |        |
|-----------------------------------------|----|---------------------------------------|---------------------------|-----|----|----|--------|-----------------------------------------------------------------------------------|---------|---------|---------|---|---------|--------|
| Q9UBW5 BIN2_HUMAN Bridging integrator 2 | 22 | Carbamidomethyl+C(3); Oxidation+M(22) | IGCYVTIFQNISNLRDVIFYREMSK | 202 | 24 | 3  | 21.66  | b6y3y4                                                                            | 2969.44 | 105.398 | 14925   | 4 | 743.11  | -9.78  |
| Q9UBW5 BIN2_HUMAN Bridging integrator 2 | 23 | Oxidation+M(9)                        | LNHNLYEVMSK               | 226 | 11 | 3  | 35.39  | b4b6b9                                                                            | 1363.65 | 90.667  | 1572    | 2 | 682.33  | -11.28 |
| Q9UBW5 BIN2_HUMAN Bridging integrator 2 | 24 |                                       | ASLGTGTASPR               | 449 | 11 | 1  | 7.74   | b4                                                                                | 999.51  | 25.591  | 1900    | 2 | 500.26  | -10.63 |
| O43707 ACTN4_HUMAN Alpha-actinin-4      | 1  |                                       | ASIHEAWTDGK               | 421 | 11 | 11 | 58.65  | b1b4b5°b5b10°b10y1y4y5y9y11                                                       | 1214.58 | 40.164  | 1063993 | 2 | 607.79  | 0.20   |
| O43707 ACTN4_HUMAN Alpha-actinin-4      | 2  |                                       | VGWEQLLTIAR               | 733 | 12 | 14 | 119.42 | b3b4b6°b6y2y3y4y5y6y7y8*y8y9y12                                                   | 1386.77 | 97.469  | 181079  | 2 | 693.89  | -2.99  |
| O43707 ACTN4_HUMAN Alpha-actinin-4      | 3  |                                       | AIMTYVSSFYHAFSGAQK        | 255 | 18 | 29 | 193.36 | b2b3b5°b5b8b10b12b13y2y4*y4y5°y5y6°y6y7y8y9y10°y10y11*y11y12°y12*y12y13y16°y16y18 | 2007.95 | 89.948  | 152323  | 3 | 669.99  | -6.81  |
| O43707 ACTN4_HUMAN Alpha-actinin-4      | 4  |                                       | TINEVENQILTR              | 745 | 12 | 9  | 48.48  | b2°b2b10y1y3y4y6y10y12                                                            | 1429.77 | 59.473  | 91770   | 2 | 715.39  | 3.59   |
| O43707 ACTN4_HUMAN Alpha-actinin-4      | 5  |                                       | LASDLLEWIR                | 300 | 10 | 7  | 59.87  | b8y2y3y4y8y9y10                                                                   | 1215.66 | 91.400  | 74825   | 2 | 608.34  | -8.64  |
| O43707 ACTN4_HUMAN Alpha-actinin-4      | 6  |                                       | ALDFIASK                  | 114 | 8  | 10 | 48.29  | b1b3°b3y2°y2y3y5y6°y6y8                                                           | 864.48  | 54.909  | 59981   | 2 | 432.74  | -8.12  |
| O43707 ACTN4_HUMAN Alpha-actinin-4      | 7  | Carbamidomethyl+C(1)                  | CQLEINFNTLQTK             | 350 | 13 | 6  | 29.26  | b2°b2b3b10b12y13                                                                  | 1608.81 | 69.704  | 24833   | 2 | 804.91  | 0.68   |
| O43707 ACTN4_HUMAN Alpha-actinin-4      | 8  |                                       | MLDAEDIVNTARPDEK          | 239 | 16 | 5  | 40.2   | b5b7b12y3y4                                                                       | 1816.89 | 73.905  | 5496    | 2 | 908.95  | 6.32   |
| O43707 ACTN4_HUMAN Alpha-actinin-4      | 9  |                                       | IMSLVDPNHSLVTFQAFIDFMSR   | 813 | 24 | 5  | 21.66  | b3y5°y5y6°y6                                                                      | 2725.38 | 102.254 | 2312    | 3 | 909.13  | 11.20  |
| O43707 ACTN4_HUMAN Alpha-actinin-4      | 10 |                                       | MAPYQGPDAVPGALDYK         | 882 | 17 | 4  | 22.13  | b4b10y3y10                                                                        | 1792.84 | 73.063  | 2303    | 3 | 598.28  | -11.30 |
| O43707 ACTN4_HUMAN Alpha-actinin-4      | 11 | Carbamidomethyl+C(6)                  | TFTAWCNShLR               | 54  | 11 | 3  | 30.62  | b4b7b8                                                                            | 1392.64 | 38.291  | 12057   | 2 | 696.82  | -7.19  |
| O43707 ACTN4_HUMAN Alpha-actinin-4      | 12 | Carbamidomethyl+C(2)                  | ACLISLGYDVENDR            | 791 | 14 | 5  | 41.26  | b5b9b12b13y6                                                                      | 1624.76 | 70.530  | 9873    | 2 | 812.88  | -3.76  |
| O43707 ACTN4_HUMAN Alpha-actinin-4      | 13 |                                       | GISQEQMQEFR               | 760 | 11 | 7  | 49.51  | b5b6b8°b8y3°y3y4                                                                  | 1352.64 | 53.681  | 6458    | 2 | 676.82  | 6.95   |
| O43707 ACTN4_HUMAN Alpha-actinin-4      | 14 |                                       | DYETATLSDIK               | 439 | 11 | 5  | 34.35  | b6°b6b10y6y10                                                                     | 1255.58 | 39.360  | 4542    | 2 | 628.29  | -18.28 |
| O43707 ACTN4_HUMAN Alpha-actinin-4      | 15 |                                       | AGTQIENIDEDFR             | 66  | 13 | 4  | 24.79  | b9°b9b10y12                                                                       | 1507.71 | 85.906  | 4333    | 2 | 754.36  | 2.02   |
| O43707 ACTN4_HUMAN Alpha-actinin-4      | 16 |                                       | TIQEMQOK                  | 323 | 8  | 5  | 32.34  | b4°b4°b4y4y5                                                                      | 1005.49 | 29.219  | 4245    | 2 | 503.25  | -15.66 |
| O43707 ACTN4_HUMAN Alpha-actinin-4      | 17 |                                       | GYEEWLLNEIR               | 395 | 11 | 6  | 51.73  | b8°b8y3y5y6y7                                                                     | 1421.70 | 86.850  | 4231    | 1 | 1421.70 | -4.38  |
| O43707 ACTN4_HUMAN Alpha-actinin-4      | 18 | Carbamidomethyl+C(10)                 | ELPPDQAEYCIAR             | 869 | 13 | 6  | 52.13  | b4b6°b6b9b11y11                                                                   | 1561.71 | 45.738  | 3749    | 2 | 781.36  | -15.71 |
| O43707 ACTN4_HUMAN Alpha-actinin-4      | 19 |                                       | VEQIAAIAQELNELDYDShNVNTR  | 469 | 25 | 4  | 12.09  | b3b13°b13y11                                                                      | 2905.34 | 64.592  | 3502    | 3 | 969.12  | -19.33 |
| O43707 ACTN4_HUMAN Alpha-actinin-4      | 20 |                                       | DDPVTNLNNAFEVAEK          | 217 | 16 | 4  | 16.61  | b4b14°b14y5                                                                       | 1775.84 | 54.793  | 3028    | 2 | 888.42  | -5.36  |
| O43707 ACTN4_HUMAN Alpha-actinin-4      | 21 |                                       | DHGGALGPEEFK              | 779 | 12 | 7  | 46.93  | b7b8y6y8°y8y9°y9                                                                  | 1256.58 | 30.896  | 2936    | 3 | 419.53  | -11.56 |
| O43707 ACTN4_HUMAN Alpha-actinin-4      | 22 |                                       | SFSTALYGESDL              | 899 | 12 | 5  | 35.24  | b7b8y8y11°y11                                                                     | 1289.59 | 66.799  | 1707    | 2 | 645.30  | -2.37  |
| O43707 ACTN4_HUMAN Alpha-actinin-4      | 23 |                                       | DHALLEEQSK                | 633 | 10 | 5  | 26.21  | b5b8°b8°b8y5                                                                      | 1169.59 | 37.532  | 1586    | 2 | 585.30  | 9.18   |
| O43707 ACTN4_HUMAN Alpha-actinin-4      | 24 | Carbamidomethyl+C(2)                  | ACLISLGYDVENDRQGEAEFNR    | 791 | 22 | 5  | 24.65  | b3b12y8y11y17                                                                     | 2556.19 | 56.619  | 206075  | 3 | 852.74  | 5.35   |

|                                                 |    |                                                                         |                                |     |    |    |        |                                     |         |         |        |   |         |        |
|-------------------------------------------------|----|-------------------------------------------------------------------------|--------------------------------|-----|----|----|--------|-------------------------------------|---------|---------|--------|---|---------|--------|
| O43707 ACTN4_HUMAN Alpha-actinin-4              | 25 |                                                                         | DHALLEEQSKQSNELHR              | 633 | 18 | 6  | 28.38  | b6b8*b8y5y6*y6                      | 2162.09 | 62.998  | 114322 | 3 | 721.37  | 14.23  |
| O43707 ACTN4_HUMAN Alpha-actinin-4              | 26 |                                                                         | TAPYKNVNVQNFHISWK              | 176 | 17 | 6  | 35.07  | b7b8b10b12y12*y12                   | 2046.04 | 61.453  | 5486   | 4 | 512.27  | -7.28  |
| O43707 ACTN4_HUMAN Alpha-actinin-4              | 27 |                                                                         | LRLSNRPAFMPSEGG                | 363 | 15 | 8  | 41.99  | b13*b13b14*b14y3*y3y6y13            | 1702.92 | 90.705  | 4648   | 3 | 568.31  | 6.74   |
| O43707 ACTN4_HUMAN Alpha-actinin-4              | 28 |                                                                         | MAPYQGPDAVPGALDYKSFSTALYGESDL  | 882 | 29 | 3  | 17.28  | b11b13b15                           | 3063.44 | 85.043  | 4643   | 3 | 1021.82 | 4.14   |
| O43707 ACTN4_HUMAN Alpha-actinin-4              | 29 | Carbamidomethyl+C(2)                                                    | ICKVLAVNQENEHLMEDYEK           | 280 | 20 | 3  | 13.93  | b3b12y19                            | 2462.14 | 94.289  | 3788   | 3 | 821.39  | -11.50 |
| O43707 ACTN4_HUMAN Alpha-actinin-4              | 30 |                                                                         | TIQEMQQKLEDFR                  | 323 | 13 | 5  | 31.41  | b4*b4b5b11y9                        | 1665.82 | 58.251  | 3600   | 2 | 833.41  | -3.66  |
| O43707 ACTN4_HUMAN Alpha-actinin-4              | 31 |                                                                         | QFASQANVVGPIWTKMEEIGR          | 652 | 22 | 3  | 13.05  | b5b11y6                             | 2489.25 | 91.298  | 3091   | 2 | 1245.13 | -4.02  |
| O43707 ACTN4_HUMAN Alpha-actinin-4              | 32 |                                                                         | DAKGISQEQMQEFR                 | 757 | 14 | 4  | 18.69  | b3b10y10*y10                        | 1666.79 | 39.465  | 2692   | 3 | 556.27  | 4.47   |
| O43707 ACTN4_HUMAN Alpha-actinin-4              | 33 | Phosphoryl STY()                                                        | FAIQDISVEETSAK                 | 152 | 14 | 4  | 29.87  | b5b8b9y9                            | 1617.75 | 92.782  | 4511   | 2 | 809.38  | 12.83  |
| O43707 ACTN4_HUMAN Alpha-actinin-4              | 34 | Phosphoryl STY(11)                                                      | LSGSNPYTTVTPQIINSK             | 604 | 18 | 5  | 33.6   | b3b9b10b12y9                        | 1999.96 | 57.575  | 3816   | 3 | 667.33  | -0.73  |
| O00151 PDLI1_HUMAN PDZ and LIM domain protein 1 | 1  | Carbamidomethyl+C(7)                                                    | AALANLCIGDVITAIDGENTSNTMHLEAQR | 38  | 31 | 14 | 101.59 | b3b4y3y4y5*y5y6y7y11y15y22y23y25y31 | 3312.59 | 95.299  | 62834  | 3 | 1104.87 | -2.73  |
| O00151 PDLI1_HUMAN PDZ and LIM domain protein 1 | 2  |                                                                         | LVGGKDFEQPLAIR                 | 17  | 15 | 5  | 40.63  | y4y6y10y13*y13                      | 1629.88 | 58.359  | 53096  | 3 | 543.97  | -7.71  |
| O00151 PDLI1_HUMAN PDZ and LIM domain protein 1 | 3  | Carbamidomethyl+C(1)                                                    | CGTGIVGVFVK                    | 262 | 11 | 5  | 26.64  | b2b6y5y6y11                         | 1136.61 | 69.104  | 49587  | 2 | 568.81  | -6.34  |
| O00151 PDLI1_HUMAN PDZ and LIM domain protein 1 | 4  |                                                                         | MNLASEPQEVHLIGSAHR             | 103 | 19 | 9  | 32.33  | b2b11y3y6*y6y7y13y19                | 2103.05 | 61.493  | 16940  | 3 | 701.69  | 2.67   |
| O00151 PDLI1_HUMAN PDZ and LIM domain protein 1 | 5  |                                                                         | SAMPFTASPASSTAR                | 122 | 16 | 9  | 47.4   | b1b8*b8b11y5y9y11y13y16             | 1582.76 | 49.933  | 16858  | 2 | 791.88  | 1.47   |
| O00151 PDLI1_HUMAN PDZ and LIM domain protein 1 | 6  |                                                                         | VAASIGNAQK                     | 246 | 10 | 6  | 39.15  | b2b9y5y7y8y10                       | 958.53  | 22.949  | 12339  | 2 | 479.77  | 1.34   |
| O00151 PDLI1_HUMAN PDZ and LIM domain protein 1 | 7  |                                                                         | QELNEPPK                       | 203 | 8  | 5  | 47.9   | b3*b3b5b7b8                         | 954.48  | 42.242  | 4015   | 2 | 477.75  | -6.46  |
| O00151 PDLI1_HUMAN PDZ and LIM domain protein 1 | 8  |                                                                         | VTPPEGYEVVTVFPK                | 314 | 15 | 6  | 46.99  | b8b9b12y10y12y13                    | 1661.88 | 72.487  | 113342 | 2 | 831.44  | 1.69   |
| O00151 PDLI1_HUMAN PDZ and LIM domain protein 1 | 9  |                                                                         | TTQQIDLQGGPWGFR                | 1   | 16 | 4  | 26.85  | b11y3y8y10                          | 1800.93 | 72.524  | 13338  | 3 | 600.98  | 17.62  |
| O00151 PDLI1_HUMAN PDZ and LIM domain protein 1 | 10 |                                                                         | MTTQQIDLQGGPWGFR               | 0   | 17 | 5  | 32.92  | b4b5b7*b7b9                         | 1931.95 | 101.766 | 5657   | 2 | 966.48  | 3.48   |
| O00151 PDLI1_HUMAN PDZ and LIM domain protein 1 | 11 |                                                                         | VITNQYNNPAGLYSSENISFNNALESK    | 138 | 28 | 3  | 11.47  | b9y9y12                             | 3101.51 | 113.846 | 4554   | 3 | 1034.51 | 9.76   |
| O00151 PDLI1_HUMAN PDZ and LIM domain protein 1 | 12 |                                                                         | QSTSFLVLQEILESEEK              | 211 | 17 | 3  | 15.8   | b5y5y12                             | 1980.02 | 90.661  | 4206   | 3 | 660.68  | 1.54   |
| O00151 PDLI1_HUMAN PDZ and LIM domain protein 1 | 13 | Carbamidomethyl+C(2)                                                    | GCTDNLTLTVAR                   | 71  | 12 | 3  | 25.61  | b8y4y5                              | 1320.66 | 48.909  | 3473   | 2 | 660.83  | -1.66  |
| O00151 PDLI1_HUMAN PDZ and LIM domain protein 1 | 14 |                                                                         | QELNEPPKQSTSFLVLQEILESEEK      | 203 | 25 | 3  | 22.58  | y8y9y20                             | 2915.53 | 105.400 | 208590 | 3 | 972.51  | 13.90  |
| O00151 PDLI1_HUMAN PDZ and LIM domain protein 1 | 15 |                                                                         | QSTSFLVLQEILESEEGDPNKPSGFR     | 211 | 27 | 5  | 17.24  | b6*b6y3y5y9                         | 3035.52 | 87.303  | 17271  | 4 | 759.63  | -4.91  |
| O00151 PDLI1_HUMAN PDZ and LIM domain protein 1 | 16 | Carbamidomethyl+C(11)                                                   | GHFFVEDQIYCEKHAR               | 296 | 16 | 5  | 16.61  | b5b8*b8y11*y11                      | 2035.92 | 114.926 | 2901   | 2 | 1018.46 | -10.97 |
| O00151 PDLI1_HUMAN PDZ and LIM domain protein 1 | 17 | Carbamidomethyl+C(6);<br>Carbamidomethyl+C(9);<br>Carbamidomethyl+C(12) | HRHPECYVCTDCGTNLK              | 277 | 17 | 8  | 55.21  | b3b4b10y3y6y8*y8y11                 | 2146.90 | 107.860 | 2029   | 4 | 537.48  | -11.37 |
| O00151 PDLI1_HUMAN PDZ and LIM domain protein 1 | 18 | Phosphoryl STY(7)                                                       | VWSPLVTEEGK                    | 87  | 11 | 3  | 26.64  | b9_H3PO4 b9y3y4                     | 1324.60 | 52.977  | 2800   | 2 | 662.80  | -6.82  |

|                                                         |    |                                      |                             |     |    |    |        |                                                                |         |         |        |   |         |        |
|---------------------------------------------------------|----|--------------------------------------|-----------------------------|-----|----|----|--------|----------------------------------------------------------------|---------|---------|--------|---|---------|--------|
| O00151 PDLII_HUMAN PDZ and LIM domain protein 1         | 19 | Oxidation+M(3)                       | SAMPFTASPASSTTAR            | 122 | 16 | 4  | 27.52  | b3b5b6y11                                                      | 1598.73 | 25.627  | 15397  | 3 | 533.58  | -11.45 |
| O00151 PDLII_HUMAN PDZ and LIM domain protein 1         | 20 | Oxidation+M(1)                       | MTTQQIDLQGGPGWGFRR          | 0   | 17 | 8  | 54.54  | b10b11*b11b12b13b15y11*y11                                     | 1947.94 | 89.047  | 3242   | 2 | 974.47  | 1.94   |
| O00151 PDLII_HUMAN PDZ and LIM domain protein 1         | 21 |                                      | GGKDFEQPLAISR               | 19  | 13 | 4  | 25.65  | b4b5b10*b10                                                    | 1417.73 | 58.308  | 5155   | 2 | 709.37  | -11.88 |
| P62937 PIIA_HUMAN Peptidyl-prolyl cis-trans isomerase A | 1  | Carbamidomethyl+C(7)                 | IIPGFMCQGGDFTR              | 55  | 14 | 10 | 89.7   | b2y6y7*y7y8y9y10y11y12y14                                      | 1598.75 | 70.548  | 145099 | 2 | 799.88  | 3.44   |
| P62937 PIIA_HUMAN Peptidyl-prolyl cis-trans isomerase A | 2  | Carbamidomethyl+C(24)                | HTGPGILSMANAGPNTNGSQFFICTAK | 91  | 27 | 11 | 56.04  | b12b13b15b16y4y11*y11y12*y12y14y27                             | 2791.33 | 75.723  | 107916 | 3 | 931.11  | -0.96  |
| P62937 PIIA_HUMAN Peptidyl-prolyl cis-trans isomerase A | 3  |                                      | EGMNIVEAMER                 | 133 | 11 | 4  | 30.62  | y4y6y7y11                                                      | 1278.59 | 67.979  | 47669  | 2 | 639.80  | 3.25   |
| P62937 PIIA_HUMAN Peptidyl-prolyl cis-trans isomerase A | 4  |                                      | VKEGMNIVEAMER               | 131 | 13 | 7  | 31.41  | b10*b10y5y6*y6y12y13                                           | 1505.73 | 60.244  | 24793  | 3 | 502.58  | -12.24 |
| P62937 PIIA_HUMAN Peptidyl-prolyl cis-trans isomerase A | 5  |                                      | FEDENFILK                   | 82  | 9  | 3  | 29.76  | b7y3y7                                                         | 1154.57 | 65.227  | 86788  | 2 | 577.79  | -2.22  |
| P62937 PIIA_HUMAN Peptidyl-prolyl cis-trans isomerase A | 6  |                                      | VNPTVFFDIAVDGEPLGR          | 1   | 18 | 3  | 24.01  | y4y6y7                                                         | 1946.01 | 97.824  | 26009  | 2 | 973.51  | 5.83   |
| P62937 PIIA_HUMAN Peptidyl-prolyl cis-trans isomerase A | 7  |                                      | MVNPTVFFDIAVDGEPLGR         | 0   | 19 | 5  | 25.13  | b10b11*b11b14y7                                                | 2077.00 | 104.524 | 3167   | 2 | 1039.00 | -19.39 |
| P62937 PIIA_HUMAN Peptidyl-prolyl cis-trans isomerase A | 8  |                                      | TAENFRALSTGEK               | 31  | 13 | 4  | 24.79  | b12y3y4*y4                                                     | 1423.72 | 55.621  | 5236   | 2 | 712.36  | -1.46  |
| P62937 PIIA_HUMAN Peptidyl-prolyl cis-trans isomerase A | 9  | Carbamidomethyl+C(24);Oxidation+M(9) | HTGPGILSMANAGPNTNGSQFFICTAK | 91  | 27 | 3  | 17.72  | b5b9b14                                                        | 2807.32 | 63.793  | 10542  | 3 | 936.44  | -2.26  |
| P00338 LDHA_HUMAN L-lactate dehydrogenase A chain       | 1  | Carbamidomethyl+C(6)                 | VIGSGCNLDSAR                | 157 | 12 | 9  | 93.61  | b2y3y4y5y6y8y10y11y12                                          | 1248.60 | 35.211  | 54515  | 2 | 624.80  | 0.39   |
| P00338 LDHA_HUMAN L-lactate dehydrogenase A chain       | 2  |                                      | LLIVSNPVDILTYVAWK           | 132 | 17 | 4  | 15.8   | b3y3y11y17                                                     | 1944.12 | 115.515 | 19393  | 2 | 972.56  | -2.01  |
| P00338 LDHA_HUMAN L-lactate dehydrogenase A chain       | 3  |                                      | IVSGKDYNVTANSK              | 76  | 14 | 11 | 83.89  | b4b5b8*b8b9*b9y1y7y8y11y12                                     | 1495.75 | 29.412  | 16094  | 3 | 499.26  | -14.04 |
| P00338 LDHA_HUMAN L-lactate dehydrogenase A chain       | 4  |                                      | LNLVQR                      | 106 | 6  | 2  | 26.31  | b3y5                                                           | 742.45  | 38.091  | 19584  | 2 | 371.73  | -12.08 |
| P00338 LDHA_HUMAN L-lactate dehydrogenase A chain       | 5  |                                      | VTLTSEEEAR                  | 305 | 10 | 4  | 26.21  | b8y4*y4y7                                                      | 1134.55 | 26.627  | 5906   | 3 | 378.86  | -11.19 |
| P00338 LDHA_HUMAN L-lactate dehydrogenase A chain       | 6  |                                      | EEQTPQNK                    | 14  | 8  | 7  | 61.23  | b3b4b5b6y5*y5*y5                                               | 973.45  | 42.251  | 2758   | 1 | 973.45  | -13.73 |
| P00338 LDHA_HUMAN L-lactate dehydrogenase A chain       | 7  |                                      | YLMGER                      | 171 | 6  | 1  | 13.37  | y5                                                             | 768.38  | 114.196 | 1583   | 1 | 768.38  | 12.23  |
| P00338 LDHA_HUMAN L-lactate dehydrogenase A chain       | 8  | Carbamidomethyl+C(15)                | GLYGKDDVFLSVPCILQGNGISDLVK  | 278 | 27 | 3  | 11.65  | b9b14y14                                                       | 2920.54 | 104.448 | 7218   | 3 | 974.18  | -3.68  |
| P00338 LDHA_HUMAN L-lactate dehydrogenase A chain       | 9  | Carbamidomethyl+C(8)                 | NRVIGSGCNLDSAR              | 155 | 14 | 5  | 41.26  | b3b8b12b13y12                                                  | 1518.76 | 89.865  | 5973   | 2 | 759.88  | 7.31   |
| P00338 LDHA_HUMAN L-lactate dehydrogenase A chain       | 10 |                                      | TLHPDLGTDKDK                | 212 | 12 | 3  | 34.85  | y8y9y10                                                        | 1339.67 | 108.712 | 2751   | 2 | 670.34  | -11.39 |
| P00338 LDHA_HUMAN L-lactate dehydrogenase A chain       | 11 |                                      | LKGEMMDLQHGSLFLR            | 57  | 16 | 5  | 27.52  | b10*b10b13b14y11                                               | 1874.97 | 92.715  | 2099   | 3 | 625.66  | 4.56   |
| P00338 LDHA_HUMAN L-lactate dehydrogenase A chain       | 12 | Carbamidomethyl+C(6)                 | VIGSGCNLDSARFR              | 157 | 14 | 6  | 26.7   | b7b13y9*y9y12*y12                                              | 1551.75 | 102.246 | 1662   | 2 | 776.38  | -10.07 |
| P00338 LDHA_HUMAN L-lactate dehydrogenase A chain       | 13 |                                      | DYNVNTANSK                  | 81  | 9  | 0  | 3.87   |                                                                | 1011.47 | 29.421  | 76091  | 2 | 506.24  | -6.58  |
| P14649 MYL6B_HUMAN Myosin light chain 6B                | 1  |                                      | ALGQNPTNAEVLK               | 94  | 13 | 22 | 130.24 | b2b3b4b5*b5b10*b10*b10b11*b11b12*b12y1y2y3y7y8y9y11*y11y13*y13 | 1354.73 | 44.624  | 193615 | 2 | 677.87  | -1.08  |
| P14649 MYL6B_HUMAN Myosin light chain 6B                | 2  | Carbamidomethyl+C(6)                 | ILYSQCGDVMR                 | 83  | 11 | 11 | 80.24  | b2y2y3y5y6y7y8y9*y9y11*y11                                     | 1341.63 | 48.234  | 119833 | 2 | 671.32  | 2.18   |

|                                                      |    |                                        |                                                  |     |    |    |        |                                                                  |         |         |        |   |         |        |
|------------------------------------------------------|----|----------------------------------------|--------------------------------------------------|-----|----|----|--------|------------------------------------------------------------------|---------|---------|--------|---|---------|--------|
| P14649 MYL6B_HUMAN Myosin light chain 6B             | 3  |                                        | VDFETFLPMLQAVAK                                  | 121 | 15 | 7  | 51.23  | b3°b3b6b8b13°b13b14                                              | 1708.93 | 96.596  | 87295  | 2 | 854.97  | 17.29  |
| P14649 MYL6B_HUMAN Myosin light chain 6B             | 4  |                                        | DQLEEFK                                          | 63  | 7  | 3  | 36.68  | b6y3y4                                                           | 908.44  | 30.193  | 13612  | 2 | 454.72  | 1.34   |
| P14649 MYL6B_HUMAN Myosin light chain 6B             | 5  |                                        | AEPVQPAPQK                                       | 35  | 11 | 3  | 23.63  | b6b8y4                                                           | 1135.59 | 25.751  | 2024   | 2 | 568.30  | -14.83 |
| P14649 MYL6B_HUMAN Myosin light chain 6B             | 6  |                                        | VFDKEGNGK                                        | 151 | 9  | 4  | 29.76  | b5y5°y5y8                                                        | 993.51  | 54.856  | 5797   | 2 | 497.26  | 11.49  |
| P14649 MYL6B_HUMAN Myosin light chain 6B             | 7  | Carbamidomethyl+C(19)                  | MTEEEVETVLGHEDSNGCINYE<br>AFLKHLSV               | 176 | 32 | 4  | 15.46  | b4b10b14y12                                                      | 3634.66 | 64.281  | 3333   | 3 | 1212.23 | -11.89 |
| P14649 MYL6B_HUMAN Myosin light chain 6B             | 8  | Carbamidomethyl+C(6);<br>Oxidation+M() | ILYSQCGDVMR                                      | 83  | 11 | 3  | 30.62  | b6b9b10                                                          | 1357.63 | 60.227  | 31453  | 3 | 453.21  | 3.42   |
| P14649 MYL6B_HUMAN Myosin light chain 6B             | 9  | Oxidation+M(9)                         | VDFETFLPMLQAVAK                                  | 121 | 15 | 4  | 35.86  | b7b8b10b12                                                       | 1724.88 | 62.267  | 6965   | 3 | 575.63  | -8.35  |
| P09493 TPM1_HUMAN Tropomyosin alpha-1 chain          | 1  |                                        | IQLVEEELDR                                       | 91  | 10 | 19 | 112.61 | b2°b2b3b4y1y2y3y4°y4<br>y5°y5y6°y6y7y8y9°y9*y<br>9y10            | 1243.65 | 58.792  | 415495 | 2 | 622.33  | -0.39  |
| P09493 TPM1_HUMAN Tropomyosin alpha-1 chain          | 2  |                                        | LATALQK                                          | 105 | 7  | 11 | 65.57  | b3°b3b4y3y5°y5y6°y<br>6*y6y7                                     | 744.45  | 27.845  | 32670  | 2 | 372.73  | -14.51 |
| P09493 TPM1_HUMAN Tropomyosin alpha-1 chain          | 3  |                                        | SIDDLEDELYAQK                                    | 251 | 13 | 3  | 24.79  | b9y9y10                                                          | 1538.69 | 37.036  | 25396  | 2 | 769.85  | -20.47 |
| P09493 TPM1_HUMAN Tropomyosin alpha-1 chain          | 4  |                                        | AISEELDHALNDMTSI                                 | 268 | 16 | 11 | 57.64  | b4b7°b7b9b13°b13y4y7<br>°y7y13°y13                               | 1758.80 | 68.753  | 8087   | 3 | 586.94  | -12.42 |
| P09493 TPM1_HUMAN Tropomyosin alpha-1 chain          | 5  |                                        | SIDDLEDELYAQK                                    | 251 | 15 | 3  | 23.59  | b5b6y5                                                           | 1779.90 | 75.478  | 17009  | 3 | 593.97  | 0.69   |
| P09493 TPM1_HUMAN Tropomyosin alpha-1 chain          | 6  |                                        | ENALDRAEQAEADK                                   | 15  | 14 | 5  | 18.69  | b5°b5b11y11°y11                                                  | 1559.73 | 70.474  | 2532   | 2 | 780.37  | 1.41   |
| P09493 TPM1_HUMAN Tropomyosin alpha-1 chain          | 7  |                                        | LATALQK                                          | 105 | 7  | 0  | 0.86   |                                                                  | 726.44  | 27.832  | 4757   | 2 | 363.72  | -5.21  |
| O95810 SDPR_HUMAN Serum deprivation-response protein | 1  |                                        | VLIFQEENEIPASVFK                                 | 156 | 17 | 21 | 117.55 | b2b3b6b8°b8b9°b9b10°<br>b10b14°b14b17y2y3y4y<br>5y7y11*y12y14y17 | 1962.06 | 88.581  | 136910 | 2 | 981.53  | 1.43   |
| O95810 SDPR_HUMAN Serum deprivation-response protein | 2  |                                        | YQASTSNTVSK                                      | 102 | 11 | 14 | 85.4   | b1b2°b2b3°b3y2y3y4y6<br>y7y8y9°y9y11                             | 1185.58 | 18.538  | 32630  | 2 | 593.29  | 1.03   |
| O95810 SDPR_HUMAN Serum deprivation-response protein | 3  |                                        | QEKPSPPSPMPSSTPSPSLNLGNT<br>EAIRDNSQVNAVTVLTLDDK | 19  | 45 | 9  | 13.7   | b3b10°b10°b10b14°b14<br>y2y8y45                                  | 4749.40 | 95.313  | 26775  | 4 | 1188.11 | 2.06   |
| O95810 SDPR_HUMAN Serum deprivation-response protein | 4  |                                        | VSPLTFGR                                         | 291 | 8  | 6  | 48.29  | b1b3y4y5y6y8                                                     | 876.48  | 54.877  | 24366  | 2 | 438.74  | -14.69 |
| O95810 SDPR_HUMAN Serum deprivation-response protein | 5  |                                        | SDGDPVQPAVLQVHQTS                                | 408 | 17 | 7  | 22.13  | b11°b11b13y1y10y12y1<br>7                                        | 1777.88 | 52.884  | 18813  | 2 | 889.44  | 4.26   |
| O95810 SDPR_HUMAN Serum deprivation-response protein | 6  |                                        | QPVSGAVEGK                                       | 173 | 10 | 12 | 72.82  | b3b10y1y2y3°y3y4y6y7<br>y8°y8y10                                 | 971.52  | 21.728  | 16661  | 2 | 486.26  | -0.44  |
| O95810 SDPR_HUMAN Serum deprivation-response protein | 7  |                                        | FQHPGSDMR                                        | 10  | 9  | 7  | 44.46  | b3°b3b9°b9y5y7y8                                                 | 1074.47 | 41.071  | 4994   | 1 | 1074.47 | -5.91  |
| O95810 SDPR_HUMAN Serum deprivation-response protein | 8  |                                        | LVNMLDAVQENQHK                                   | 64  | 14 | 4  | 30.66  | b3y5y7y9                                                         | 1638.81 | 59.153  | 104050 | 3 | 546.94  | -7.97  |
| O95810 SDPR_HUMAN Serum deprivation-response protein | 9  |                                        | YEGSYALTSEEAEER                                  | 394 | 14 | 6  | 32.14  | b3°b3b4y3y5°y5                                                   | 1604.67 | 48.104  | 11763  | 2 | 802.84  | -21.98 |
| O95810 SDPR_HUMAN Serum deprivation-response protein | 10 |                                        | VEESR                                            | 222 | 5  | 4  | 25.88  | b3°b3y4°y4                                                       | 619.31  | 101.804 | 1892   | 1 | 619.31  | 9.95   |
| O95810 SDPR_HUMAN Serum deprivation-response protein | 11 |                                        | VRYEGSYALTSEEAEER                                | 392 | 16 | 4  | 23.15  | b7y9y10°y10                                                      | 1859.87 | 67.752  | 16931  | 2 | 930.44  | -4.53  |
| O95810 SDPR_HUMAN Serum deprivation-response protein | 12 |                                        | GEDAAQAEKFQHPGSDMR                               | 1   | 18 | 5  | 15.09  | b7b12°b12y3°y3                                                   | 1973.89 | 71.993  | 3848   | 2 | 987.45  | 4.45   |
| O95810 SDPR_HUMAN Serum deprivation-response protein | 13 |                                        | VREGESHAENETK                                    | 301 | 13 | 4  | 24.79  | b5°b5b6y3                                                        | 1485.68 | 12.586  | 3722   | 3 | 495.90  | -11.59 |

|                                                      |    |                       |                                           |     |    |    |        |                                           |         |         |        |   |         |        |
|------------------------------------------------------|----|-----------------------|-------------------------------------------|-----|----|----|--------|-------------------------------------------|---------|---------|--------|---|---------|--------|
| O95810 SDPR_HUMAN Serum deprivation-response protein | 14 |                       | QPVSGAVEGKEELPDENK                        | 173 | 18 | 4  | 15.09  | b6y11y13*y13                              | 1925.93 | 70.478  | 1794   | 2 | 963.47  | -5.96  |
| O95810 SDPR_HUMAN Serum deprivation-response protein | 15 | Phosphoryl STY(18)    | QEKPSPPSPMPSPSTPSPSLNLGNT<br>EAIR         | 19  | 29 | 6  | 29.55  | b7°b7b15b17y13y14                         | 3118.42 | 72.934  | 2372   | 3 | 1040.14 | -3.76  |
| O95810 SDPR_HUMAN Serum deprivation-response protein | 16 | Oxidation+M(6)        | GSNSGMDSNIDLTIVEDEEEESVA<br>LEQAQK        | 362 | 30 | 4  | 11.2   | b15y5*y5y15                               | 3253.46 | 99.592  | 3632   | 4 | 814.12  | 3.30   |
| O95810 SDPR_HUMAN Serum deprivation-response protein | 17 |                       | VLIFQEENEIPASVFFV                         | 156 | 16 | 0  | 5.16   |                                           | 1833.96 | 88.649  | 1692   | 4 | 459.25  | -0.87  |
| O95810 SDPR_HUMAN Serum deprivation-response protein | 18 |                       | QPVSGAVEGK                                | 173 | 10 | 0  | 2.15   |                                           | 954.50  | 21.749  | 3675   | 2 | 477.75  | 12.34  |
| P11142 HSP7C_HUMAN Heat shock cognate 71 kDa protein | 1  |                       | DAGTIAGLNVLR                              | 159 | 12 | 5  | 25.61  | b6°b6b7y7y12                              | 1199.67 | 69.004  | 109789 | 2 | 600.34  | -4.27  |
| P11142 HSP7C_HUMAN Heat shock cognate 71 kDa protein | 2  |                       | VEIANDQGNR                                | 25  | 11 | 9  | 69.44  | b2b3y4*y4y6y7y8y9y11                      | 1228.62 | 35.756  | 62859  | 2 | 614.82  | -2.68  |
| P11142 HSP7C_HUMAN Heat shock cognate 71 kDa protein | 3  |                       | TVTNAVVTVPAYFNDSQR                        | 137 | 18 | 7  | 65.77  | y4y9°y9y10y11y12y13                       | 1982.01 | 68.518  | 34247  | 2 | 991.51  | 3.88   |
| P11142 HSP7C_HUMAN Heat shock cognate 71 kDa protein | 4  |                       | NSLESYAFNMK                               | 539 | 11 | 8  | 49.58  | b1b2°b2y3y4y6y7y11                        | 1303.62 | 64.198  | 30818  | 2 | 652.31  | 13.67  |
| P11142 HSP7C_HUMAN Heat shock cognate 71 kDa protein | 5  |                       | FEELNADLFR                                | 301 | 10 | 4  | 26.21  | b9y6y8y10                                 | 1253.62 | 73.732  | 22752  | 2 | 627.31  | -0.29  |
| P11142 HSP7C_HUMAN Heat shock cognate 71 kDa protein | 6  | Carbamidomethyl+C(14) | GPAVGIDLGTTYSCVGVFQH GK                   | 3   | 22 | 3  | 13.05  | b3b14y13                                  | 2263.09 | 76.775  | 9077   | 2 | 1132.05 | -11.22 |
| P11142 HSP7C_HUMAN Heat shock cognate 71 kDa protein | 7  |                       | LYQSAGGMPGGMPGGFPGGGAP<br>PSGGASSGPTIEEVD | 609 | 37 | 7  | 27.48  | b4b6°b6b16°b16y3y4                        | 3346.51 | 75.305  | 2975   | 3 | 1116.18 | 3.87   |
| P11142 HSP7C_HUMAN Heat shock cognate 71 kDa protein | 8  |                       | NQVAMNPTNTVFD AK                          | 56  | 15 | 3  | 10.19  | b10°b10y3                                 | 1649.81 | 45.091  | 2018   | 3 | 550.61  | 8.95   |
| P11142 HSP7C_HUMAN Heat shock cognate 71 kDa protein | 9  | Carbamidomethyl+C(2)  | VCNPIITK                                  | 601 | 8  | 3  | 32.34  | b5y5y6                                    | 944.52  | 38.836  | 38450  | 2 | 472.76  | -3.81  |
| P11142 HSP7C_HUMAN Heat shock cognate 71 kDa protein | 10 |                       | GTLDPVEK                                  | 311 | 8  | 3  | 32.34  | b4b5y4                                    | 858.44  | 32.483  | 17614  | 2 | 429.73  | -14.15 |
| P11142 HSP7C_HUMAN Heat shock cognate 71 kDa protein | 11 |                       | VQVEYK                                    | 102 | 6  | 4  | 26.31  | b4°b4y5*y5                                | 765.41  | 26.754  | 4539   | 2 | 383.21  | -10.21 |
| P11142 HSP7C_HUMAN Heat shock cognate 71 kDa protein | 12 |                       | DISENK                                    | 251 | 6  | 1  | 13.37  | y5                                        | 705.34  | 96.565  | 3421   | 1 | 705.34  | -6.23  |
| P11142 HSP7C_HUMAN Heat shock cognate 71 kDa protein | 13 |                       | SINPDEAVAYGAAVQAAILSGDK                   | 361 | 23 | 5  | 28.16  | b7b9b10°b10b21                            | 2260.11 | 36.899  | 3286   | 2 | 1130.56 | -17.18 |
| P11142 HSP7C_HUMAN Heat shock cognate 71 kDa protein | 14 |                       | DISENKR                                   | 251 | 7  | 3  | 39.69  | b4b6y5                                    | 861.43  | 29.254  | 40642  | 1 | 861.43  | -8.79  |
| P11142 HSP7C_HUMAN Heat shock cognate 71 kDa protein | 15 |                       | NQVAMNPTNTVFD AKR                         | 56  | 16 | 3  | 16.61  | b5b7y5                                    | 1805.90 | 71.243  | 6869   | 3 | 602.64  | -0.34  |
| P11142 HSP7C_HUMAN Heat shock cognate 71 kDa protein | 16 |                       | INDEDKQK                                  | 561 | 8  | 3  | 32.34  | b3y6y7                                    | 989.48  | 98.532  | 3455   | 1 | 989.48  | -5.24  |
| P11142 HSP7C_HUMAN Heat shock cognate 71 kDa protein | 17 |                       | GETKSFYPEEVSSMVLTK                        | 108 | 18 | 3  | 24.01  | b4b9b10                                   | 2031.99 | 97.351  | 3094   | 3 | 678.00  | -1.44  |
| P11142 HSP7C_HUMAN Heat shock cognate 71 kDa protein | 18 |                       | RFDDAVVQSDMK                              | 76  | 12 | 10 | 69.81  | b5b6b11y5°y5y8*y8y9°<br>y9y11             | 1410.68 | 108.698 | 1873   | 2 | 705.85  | 10.56  |
| P11142 HSP7C_HUMAN Heat shock cognate 71 kDa protein | 19 |                       | NQTAEKEEFHQK                              | 583 | 14 | 4  | 18.69  | b3°b3b10y9                                | 1745.82 | 126.256 | 1623   | 2 | 873.41  | 5.38   |
| P11142 HSP7C_HUMAN Heat shock cognate 71 kDa protein | 20 | Carbamidomethyl+C(14) | GPAVGIDLGTTYSCVGVFQH GK                   | 3   | 22 | 0  | 7.32   |                                           | 2246.06 | 76.746  | 16756  | 2 | 1123.54 | -10.11 |
| Q9Y281 COF2_HUMAN Cofilin-2                          | 1  |                       | KEDLVFIFWAPESAPLK                         | 95  | 17 | 10 | 89.85  | b4b5b6b7y3y6y7y8y12y<br>17                | 1990.05 | 97.294  | 166285 | 3 | 664.02  | -9.69  |
| Q9Y281 COF2_HUMAN Cofilin-2                          | 2  |                       | YALYDATYETK                               | 81  | 11 | 15 | 108.27 | b2b6b8b9°b9b11°b11y4<br>y6y7y8y9°y9y10y11 | 1337.63 | 52.210  | 128269 | 2 | 669.32  | 1.19   |
| Q9Y281 COF2_HUMAN Cofilin-2                          | 3  |                       | HEWQVNLDDIK                               | 132 | 12 | 5  | 21.63  | b4y6y11°y11*y11                           | 1453.70 | 53.634  | 3585   | 3 | 485.24  | -7.89  |
| Q9Y281 COF2_HUMAN Cofilin-2                          | 4  |                       | MASGVTVNDEVIK                             | 0   | 13 | 4  | 29.26  | b6b8b12°b12                               | 1362.72 | 69.988  | 3086   | 3 | 454.91  | 16.39  |
| Q9Y281 COF2_HUMAN Cofilin-2                          | 5  |                       | MASGVTVNDEVIKVFNDMK                       | 0   | 19 | 5  | 25.13  | b8b9b12°b12y12                            | 2097.06 | 71.884  | 6776   | 3 | 699.69  | 10.25  |
| Q9Y281 COF2_HUMAN Cofilin-2                          | 6  |                       | ASGVTVNDEVIKVFNDMK                        | 1   | 18 | 6  | 31.8   | y3°y3y7*y7y11y12                          | 1965.98 | 105.502 | 5556   | 3 | 656.00  | -5.90  |



|                                                         |    |                       |                                       |     |    |    |        |                                       |         |         |        |   |         |        |
|---------------------------------------------------------|----|-----------------------|---------------------------------------|-----|----|----|--------|---------------------------------------|---------|---------|--------|---|---------|--------|
| Q9Y281 COF2_HUMAN Cofilin-2                             | 7  | Phosphoryl STY(10)    | QILVGDIGDTVEDPYTSFVK                  | 53  | 20 | 5  | 22.06  | b11*b11y9°y9y10                       | 2276.08 | 107.819 | 4198   | 3 | 759.37  | 7.94   |
| Q01518 CAP1_HUMAN Adenylyl cyclase-associated protein 1 | 1  |                       | LSDLLAPISEQIK                         | 100 | 13 | 4  | 20.02  | b5y5°y5y7                             | 1426.82 | 77.011  | 49790  | 2 | 713.91  | 2.22   |
| Q01518 CAP1_HUMAN Adenylyl cyclase-associated protein 1 | 2  |                       | AGAAPYVQAFDSSLAGPVAEYLK               | 37  | 23 | 16 | 112.88 | b2b3b4b5b6b7b9b12°b12b13y2y4y5y7y8y23 | 2351.20 | 115.177 | 49011  | 3 | 784.41  | -10.59 |
| Q01518 CAP1_HUMAN Adenylyl cyclase-associated protein 1 | 3  | Carbamidomethyl+C(9)  | ALLVTASQCQQAENK                       | 84  | 16 | 7  | 26.85  | b3b11b14y2y6*y6y16                    | 1757.89 | 43.192  | 43279  | 2 | 879.45  | 2.57   |
| Q01518 CAP1_HUMAN Adenylyl cyclase-associated protein 1 | 4  | Carbamidomethyl+C(5)  | NSLDCEIVSAK                           | 422 | 11 | 7  | 35.78  | b1b4y1y4y5y9y11                       | 1235.60 | 46.317  | 39291  | 2 | 618.30  | 5.04   |
| Q01518 CAP1_HUMAN Adenylyl cyclase-associated protein 1 | 5  |                       | VENQENVSNLVIETELK                     | 330 | 18 | 7  | 65.77  | y4y5y6y7y8y11y18                      | 2073.04 | 69.630  | 35056  | 2 | 1037.02 | 3.42   |
| Q01518 CAP1_HUMAN Adenylyl cyclase-associated protein 1 | 6  |                       | SSEMNVLIPTTEGGDFNEFPVPEQFK            | 433 | 25 | 12 | 27.21  | b1b8*b8y1y2y4°y4y5°y5y10y17y25        | 2811.35 | 91.276  | 27626  | 2 | 1406.18 | 10.59  |
| Q01518 CAP1_HUMAN Adenylyl cyclase-associated protein 1 | 7  |                       | LFNHLSAVSESIQALGWVAMAPKPGPYVK         | 126 | 29 | 4  | 14.03  | b6b13y6y12                            | 3110.62 | 97.896  | 23225  | 4 | 778.41  | -11.07 |
| Q01518 CAP1_HUMAN Adenylyl cyclase-associated protein 1 | 8  | Carbamidomethyl+C(9)  | INSITVDNCKK                           | 366 | 11 | 9  | 49.58  | b2*b2y1y2y4y5y7*y7y9                  | 1291.65 | 28.575  | 21484  | 3 | 431.22  | -11.15 |
| Q01518 CAP1_HUMAN Adenylyl cyclase-associated protein 1 | 9  |                       | LEAVSHTSDMHR                          | 17  | 12 | 6  | 28.83  | b2y3y6°y6y7°y7                        | 1382.64 | 24.226  | 21384  | 3 | 461.55  | -7.95  |
| Q01518 CAP1_HUMAN Adenylyl cyclase-associated protein 1 | 10 |                       | EMNDAAMFYTNR                          | 155 | 12 | 4  | 28.83  | y6y7y10y12                            | 1462.62 | 57.095  | 18918  | 2 | 731.81  | 4.92   |
| Q01518 CAP1_HUMAN Adenylyl cyclase-associated protein 1 | 11 |                       | SGPKPFSAPKQTSPPSPK                    | 294 | 18 | 3  | 22.25  | y6y8y10                               | 1837.97 | 33.743  | 11142  | 3 | 613.33  | -7.64  |
| Q01518 CAP1_HUMAN Adenylyl cyclase-associated protein 1 | 12 |                       | HVDWVK                                | 178 | 6  | 1  | 13.37  | b4                                    | 783.42  | 82.971  | 8867   | 1 | 783.42  | 9.82   |
| Q01518 CAP1_HUMAN Adenylyl cyclase-associated protein 1 | 13 |                       | AVGR                                  | 13  | 4  | 1  | 12.51  | b3                                    | 402.25  | 96.852  | 7904   | 1 | 402.25  | -1.06  |
| Q01518 CAP1_HUMAN Adenylyl cyclase-associated protein 1 | 14 | Carbamidomethyl+C(9)  | INSITVDNCK                            | 366 | 10 | 4  | 40.12  | b3b7y6y7                              | 1163.58 | 34.638  | 7844   | 2 | 582.29  | 7.03   |
| Q01518 CAP1_HUMAN Adenylyl cyclase-associated protein 1 | 15 |                       | EVITFR                                | 113 | 6  | 2  | 13.37  | b5°b5                                 | 764.43  | 64.044  | 2637   | 2 | 382.72  | -1.20  |
| Q01518 CAP1_HUMAN Adenylyl cyclase-associated protein 1 | 16 |                       | EFHTTGLAWSK                           | 198 | 11 | 6  | 40.55  | b4°b4b7b9y3°y3                        | 1276.65 | 42.251  | 2013   | 3 | 426.22  | 11.86  |
| Q01518 CAP1_HUMAN Adenylyl cyclase-associated protein 1 | 17 | Carbamidomethyl+C(9)  | ALLVTASQCQQAENKLSDLLAPISEQIK          | 84  | 29 | 6  | 51.14  | b3b4b14b15y7y8                        | 3165.69 | 88.993  | 38336  | 3 | 1055.90 | 2.93   |
| Q01518 CAP1_HUMAN Adenylyl cyclase-associated protein 1 | 18 |                       | LEAVSHTSDMHRGYADSPSK                  | 17  | 20 | 7  | 43.31  | b3b12°b12y6y8y9y10                    | 2188.03 | 62.957  | 21798  | 3 | 730.01  | 9.82   |
| Q01518 CAP1_HUMAN Adenylyl cyclase-associated protein 1 | 19 |                       | SSLFAQINQGESITHALKHVSDDMK             | 254 | 25 | 5  | 21.64  | b9°b9b10y8°y8                         | 2756.37 | 118.199 | 13683  | 3 | 919.46  | 2.30   |
| Q01518 CAP1_HUMAN Adenylyl cyclase-associated protein 1 | 20 | Carbamidomethyl+C(5)  | NSLDCEIVSAKSSEMNVLIPTTEGGDFNEFPVPEQFK | 422 | 36 | 3  | 10.87  | b13y10y17                             | 4027.87 | 87.409  | 9445   | 3 | 1343.29 | -6.24  |
| Q01518 CAP1_HUMAN Adenylyl cyclase-associated protein 1 | 21 |                       | HVSDDMKTHK                            | 272 | 10 | 3  | 27.97  | b7y8y9                                | 1197.58 | 83.665  | 3268   | 1 | 1197.58 | 8.05   |
| Q01518 CAP1_HUMAN Adenylyl cyclase-associated protein 1 | 22 | Phosphoryl STY(5)     | EFHTTGLAWSK                           | 198 | 11 | 3  | 30.62  | b3b4b7                                | 1356.60 | 39.377  | 12118  | 2 | 678.80  | 7.83   |
| Q01518 CAP1_HUMAN Adenylyl cyclase-associated protein 1 | 23 | Phosphoryl STY(8)     | VENQENVSNLVIETELK                     | 330 | 18 | 6  | 25.81  | b7y11y12°y12*y12y16                   | 2153.02 | 76.265  | 2311   | 2 | 1077.01 | 12.81  |
| Q01518 CAP1_HUMAN Adenylyl cyclase-associated protein 1 | 24 |                       | SESIQALGWVAMAPKPGPYVK                 | 134 | 21 | 1  | 9.47   | b13                                   | 2229.14 | 97.844  | 3599   | 3 | 743.72  | -13.03 |
| Q01518 CAP1_HUMAN Adenylyl cyclase-associated protein 1 | 25 | Carbamidomethyl+C(7)  | SITVDNCKK                             | 368 | 9  | 0  | 2.58   |                                       | 1064.53 | 28.602  | 2979   | 2 | 532.77  | -12.38 |
| Q13509 TBB3_HUMAN Tubulin beta-3 chain                  | 1  |                       | LAVNMVFPFR                            | 252 | 10 | 10 | 85.76  | b2b5*b5y4y5y6y7y8y9y10                | 1143.63 | 72.182  | 134998 | 2 | 572.32  | -5.34  |
| Q13509 TBB3_HUMAN Tubulin beta-3 chain                  | 2  |                       | IMNTFSVVPSPK                          | 162 | 12 | 4  | 25.61  | b4y1y7y8                              | 1319.71 | 63.200  | 97959  | 2 | 660.36  | 6.94   |
| Q13509 TBB3_HUMAN Tubulin beta-3 chain                  | 3  | Carbamidomethyl+C(10) | EIVHIQAGQCQNQIGAK                     | 2   | 17 | 9  | 42.48  | b4°b4b5°b5b12y2y3y8y12                | 1822.94 | 43.159  | 10570  | 2 | 911.97  | 9.38   |

|                                                                             |    |                                            |                                  |      |    |    |        |                                         |         |         |        |   |         |        |
|-----------------------------------------------------------------------------|----|--------------------------------------------|----------------------------------|------|----|----|--------|-----------------------------------------|---------|---------|--------|---|---------|--------|
| Q13509 TBB3_HUMAN Tubulin beta-3 chain                                      | 4  |                                            | FWEVISDEHGIDPSGNYVGDSDLQLER      | 19   | 27 | 6  | 22.01  | b5y3°y3y4y11°y11                        | 3077.42 | 118.157 | 6148   | 3 | 1026.48 | 4.05   |
| Q13509 TBB3_HUMAN Tubulin beta-3 chain                                      | 5  |                                            | ISEQFTAMFRR                      | 380  | 11 | 6  | 23.63  | b1b5b10*b10y8y11                        | 1385.70 | 71.875  | 2533   | 3 | 462.57  | -0.79  |
| Q13509 TBB3_HUMAN Tubulin beta-3 chain                                      | 6  |                                            | MSSTFIGNSTAIQELFK                | 362  | 17 | 3  | 15.8   | b7y3y10                                 | 1873.90 | 116.067 | 2310   | 3 | 625.31  | -18.63 |
| Q13509 TBB3_HUMAN Tubulin beta-3 chain                                      | 7  |                                            | SGAFGHLFRPDNFIFGQSGAGNNWAK       | 77   | 26 | 4  | 11.85  | b3b13y5*y5                              | 2795.39 | 73.820  | 2053   | 4 | 699.60  | 15.63  |
| Q13509 TBB3_HUMAN Tubulin beta-3 chain                                      | 8  |                                            | ISVYYNEASSHK                     | 46   | 12 | 4  | 21.63  | b11y3y9°y9                              | 1397.64 | 41.643  | 2038   | 2 | 699.32  | -21.31 |
| Q13509 TBB3_HUMAN Tubulin beta-3 chain                                      | 9  |                                            | MSMKEVDEQMLAIQSK                 | 320  | 16 | 4  | 16.61  | b4b10y11*y11                            | 1867.88 | 98.551  | 3126   | 4 | 467.73  | -8.95  |
| Q13509 TBB3_HUMAN Tubulin beta-3 chain                                      | 10 |                                            | EVISDEHGIDPSGNYVGDSDLQLER        | 21   | 25 | 2  | 8.98   | b13°b13                                 | 2744.27 | 118.215 | 3165   | 3 | 915.43  | 2.76   |
| A6NKZ8 YI016_HUMAN Putative tubulin beta chain-like protein ENSP00000290377 | 1  |                                            | LAVNMVPPFR                       | 180  | 10 | 10 | 85.76  | b2b5*b5y4y5y6y7y8y9y10                  | 1143.63 | 72.182  | 134998 | 2 | 572.32  | -5.34  |
| A6NKZ8 YI016_HUMAN Putative tubulin beta chain-like protein ENSP00000290377 | 2  |                                            | IREEYPDR                         | 82   | 8  | 8  | 48.29  | b2b3b4b7°b7y1y4y8                       | 1077.53 | 24.134  | 32991  | 2 | 539.27  | 1.02   |
| A6NKZ8 YI016_HUMAN Putative tubulin beta chain-like protein ENSP00000290377 | 3  |                                            | YTEGAELTESVMDVVRK                | 33   | 17 | 5  | 35.93  | b3b7b12b14°b14                          | 1926.96 | 81.458  | 5389   | 3 | 642.99  | 3.86   |
| A6NKZ8 YI016_HUMAN Putative tubulin beta chain-like protein ENSP00000290377 | 4  |                                            | GRYTEGAELTESVMDVVR               | 31   | 18 | 4  | 25.81  | b5b8b9y12                               | 2011.95 | 65.499  | 8514   | 3 | 671.32  | -10.80 |
| A6NKZ8 YI016_HUMAN Putative tubulin beta chain-like protein ENSP00000290377 | 5  | Carbamidomethyl+C(18)                      | MSASFIGNNAAIQELFTCVSEQFTAMFRR    | 290  | 29 | 5  | 11.32  | b7b16y12°y12*y12                        | 3326.58 | 136.634 | 7141   | 2 | 1663.80 | 2.42   |
| A6NKZ8 YI016_HUMAN Putative tubulin beta chain-like protein ENSP00000290377 | 6  | Carbamidomethyl+C(23)                      | MDSVRSRGPFGQLRPDNFIFGQC GAGNNWAK | 0    | 31 | 6  | 18.07  | b5b11b13y7*y7y11                        | 3425.63 | 118.956 | 4513   | 4 | 857.16  | -0.36  |
| A6NKZ8 YI016_HUMAN Putative tubulin beta chain-like protein ENSP00000290377 | 7  | Carbamidomethyl+C(18);Oxidation+M(26)      | MSASFIGNNAAIQELFTCVSEQFTAMFR     | 290  | 28 | 6  | 16.81  | b4°b4b12b18°b18y5                       | 3186.46 | 83.885  | 55154  | 3 | 1062.82 | -3.29  |
| Q14185 DOCK1_HUMAN Dedicator of cytokinesis protein 1                       | 1  | Carbamidomethyl+C(8);Carbamidomethyl+C(22) | SMQSLGSC TISKDSFQISTLVCSTK       | 587  | 25 | 3  | 12.09  | b6y4y8                                  | 2765.31 | 65.994  | 31480  | 4 | 692.08  | -0.88  |
| Q14185 DOCK1_HUMAN Dedicator of cytokinesis protein 1                       | 2  |                                            | QLYVQDNREMFR                     | 104  | 12 | 15 | 100.92 | b3b6b7b8*b8y6y7°y7y8y9°y9y11°y11*y11y12 | 1598.76 | 54.889  | 18787  | 2 | 799.88  | -9.62  |
| Q14185 DOCK1_HUMAN Dedicator of cytokinesis protein 1                       | 3  |                                            | NYVDGAEKPGVNEQLYK                | 720  | 17 | 3  | 22.78  | b15y11y12                               | 1923.96 | 106.403 | 15993  | 2 | 962.48  | 5.77   |
| Q14185 DOCK1_HUMAN Dedicator of cytokinesis protein 1                       | 4  |                                            | NVYPFDWVIMNMVQNK                 | 978  | 16 | 4  | 23.44  | b7b11y7y13                              | 1997.97 | 102.041 | 10812  | 2 | 999.49  | 3.97   |
| Q14185 DOCK1_HUMAN Dedicator of cytokinesis protein 1                       | 5  |                                            | NVEVTVSVYDEDGK                   | 446  | 14 | 7  | 29.87  | b4*b5°b5y2y4y5y10                       | 1553.75 | 52.156  | 8617   | 2 | 777.38  | 13.59  |
| Q14185 DOCK1_HUMAN Dedicator of cytokinesis protein 1                       | 6  |                                            | LEDAATYLSLPSTK                   | 560  | 14 | 4  | 18.69  | b2b3b7y12                               | 1508.79 | 82.579  | 8449   | 2 | 754.90  | 5.02   |
| Q14185 DOCK1_HUMAN Dedicator of cytokinesis protein 1                       | 7  |                                            | VAIPIEDVNR                       | 496  | 10 | 5  | 26.21  | b1b4b7y2y5                              | 1125.61 | 60.690  | 5705   | 2 | 563.31  | -14.10 |
| Q14185 DOCK1_HUMAN Dedicator of cytokinesis protein 1                       | 8  |                                            | YLQEHPEAHEK                      | 1549 | 11 | 4  | 12.9   | b4*b4b11y3                              | 1380.67 | 53.653  | 3861   | 1 | 1380.67 | 13.53  |
| Q14185 DOCK1_HUMAN Dedicator of cytokinesis protein 1                       | 9  |                                            | IMPSSLDDRR                       | 1615 | 10 | 3  | 40.98  | y4y6y9                                  | 1189.60 | 53.662  | 3856   | 2 | 595.30  | 1.95   |
| Q14185 DOCK1_HUMAN Dedicator of cytokinesis protein 1                       | 10 |                                            | QAQFYENIVK                       | 1320 | 10 | 3  | 27.97  | b4b5y7                                  | 1239.62 | 49.440  | 1961   | 2 | 620.32  | -10.44 |
| Q14185 DOCK1_HUMAN Dedicator of cytokinesis protein 1                       | 11 |                                            | WFEVK                            | 1475 | 5  | 1  | 12.94  | y3                                      | 708.38  | 46.411  | 19575  | 1 | 708.38  | 11.98  |

|                                                       |    |                       |                               |      |    |   |       |                       |         |         |        |   |        |        |
|-------------------------------------------------------|----|-----------------------|-------------------------------|------|----|---|-------|-----------------------|---------|---------|--------|---|--------|--------|
| Q14185 DOCK1_HUMAN Dedicator of cytokinesis protein 1 | 12 | Carbamidomethyl+C(10) | DSFQISTLVCSTK                 | 599  | 13 | 3 | 27.5  | b4b7b8                | 1485.69 | 64.404  | 16781  | 3 | 495.90 | -21.20 |
| Q14185 DOCK1_HUMAN Dedicator of cytokinesis protein 1 | 13 |                       | LEHVIFPGAGDEAISEYK            | 461  | 18 | 5 | 15.09 | b3*b3b12*b12y10       | 1975.02 | 80.737  | 16560  | 3 | 659.01 | 21.94  |
| Q14185 DOCK1_HUMAN Dedicator of cytokinesis protein 1 | 14 |                       | TGETFVK                       | 1165 | 7  | 3 | 39.69 | b3y3y5                | 781.42  | 55.531  | 8022   | 2 | 391.21 | 9.92   |
| Q14185 DOCK1_HUMAN Dedicator of cytokinesis protein 1 | 15 |                       | YLYK                          | 1218 | 4  | 1 | 12.51 | b3                    | 586.32  | 34.867  | 7577   | 1 | 586.32 | -6.56  |
| Q14185 DOCK1_HUMAN Dedicator of cytokinesis protein 1 | 16 |                       | DDLEK                         | 1687 | 5  | 2 | 25.88 | b3y3                  | 619.30  | 29.448  | 6949   | 1 | 619.30 | 3.84   |
| Q14185 DOCK1_HUMAN Dedicator of cytokinesis protein 1 | 17 |                       | EWSTIWR                       | 97   | 7  | 4 | 36.68 | b6*b6y4y5             | 977.47  | 29.257  | 5822   | 2 | 489.24 | -17.55 |
| Q14185 DOCK1_HUMAN Dedicator of cytokinesis protein 1 | 18 |                       | NDIYVTLVQGDFDK                | 425  | 14 | 7 | 41.26 | b4*b4b5b11*b11b13y10  | 1626.77 | 81.443  | 5041   | 2 | 813.89 | -19.81 |
| Q14185 DOCK1_HUMAN Dedicator of cytokinesis protein 1 | 19 |                       | GAALK                         | 794  | 5  | 1 | 12.94 | b4                    | 459.29  | 34.891  | 4755   | 1 | 459.29 | -5.58  |
| Q14185 DOCK1_HUMAN Dedicator of cytokinesis protein 1 | 20 |                       | SINDMSSMSDQTVR                | 777  | 15 | 7 | 52.2  | b3b4*b4y3y7y10y11     | 1701.75 | 46.948  | 3391   | 2 | 851.38 | 16.36  |
| Q14185 DOCK1_HUMAN Dedicator of cytokinesis protein 1 | 21 |                       | DMWYNLQGHK                    | 1067 | 10 | 4 | 46.93 | b9y5y7y9              | 1291.59 | 41.600  | 3322   | 2 | 646.30 | -1.51  |
| Q14185 DOCK1_HUMAN Dedicator of cytokinesis protein 1 | 22 |                       | SFQMFENEITK                   | 1119 | 12 | 5 | 25.61 | b9*b9b10y10*y10       | 1486.70 | 54.892  | 2671   | 3 | 496.24 | -13.79 |
| Q14185 DOCK1_HUMAN Dedicator of cytokinesis protein 1 | 23 |                       | AEAK                          | 555  | 4  | 2 | 12.51 | b3*b3                 | 418.23  | 34.780  | 2109   | 1 | 418.23 | -2.41  |
| Q14185 DOCK1_HUMAN Dedicator of cytokinesis protein 1 | 24 |                       | SVFMVEISPLENAIETMQLTNDK       | 1480 | 23 | 6 | 27.32 | b4b12y10*y10y11y18    | 2609.24 | 100.757 | 2019   | 3 | 870.42 | -16.47 |
| Q14185 DOCK1_HUMAN Dedicator of cytokinesis protein 1 | 25 | Carbamidomethyl+C(2)  | LCDLHK                        | 1222 | 6  | 1 | 13.37 | b4                    | 785.39  | 62.193  | 1958   | 1 | 785.39 | -9.01  |
| Q14185 DOCK1_HUMAN Dedicator of cytokinesis protein 1 | 26 |                       | TGFPEIIMP GDVR                | 412  | 13 | 6 | 41.92 | b4*b4b6b9y3y9         | 1431.75 | 109.724 | 1942   | 2 | 716.38 | 12.70  |
| Q14185 DOCK1_HUMAN Dedicator of cytokinesis protein 1 | 27 |                       | FQHFNPVLETYIK                 | 690  | 13 | 7 | 40.44 | b4*b4b6*b6b7*b7b12    | 1635.82 | 89.105  | 1715   | 2 | 818.41 | -20.15 |
| Q14185 DOCK1_HUMAN Dedicator of cytokinesis protein 1 | 28 |                       | EYGV RIMPSSLDDR               | 1610 | 14 | 3 | 18.69 | b9y6y9                | 1637.80 | 77.492  | 19174  | 2 | 819.41 | 5.81   |
| Q14185 DOCK1_HUMAN Dedicator of cytokinesis protein 1 | 29 | Carbamidomethyl+C(15) | GHSATGKSMQSLGCTISK            | 580  | 19 | 4 | 14.47 | b12*b12b16y7          | 1936.94 | 70.623  | 19028  | 3 | 646.32 | 8.95   |
| Q14185 DOCK1_HUMAN Dedicator of cytokinesis protein 1 | 30 |                       | RLEHVIFPGAGDEAISEYK           | 460  | 19 | 4 | 14.47 | b13y10*y10y13         | 2131.08 | 90.049  | 10357  | 3 | 711.03 | 0.11   |
| Q14185 DOCK1_HUMAN Dedicator of cytokinesis protein 1 | 31 |                       | KLEDAATYLSLPSTK               | 559  | 15 | 3 | 17.57 | b5y5y7                | 1636.90 | 69.103  | 10076  | 2 | 818.95 | 9.84   |
| Q14185 DOCK1_HUMAN Dedicator of cytokinesis protein 1 | 32 |                       | EEKYGVAFYNYDAR                | 9    | 14 | 7 | 37.88 | b3b12y6y7*y7*y7y9     | 1724.79 | 43.539  | 7314   | 3 | 575.60 | -2.90  |
| Q14185 DOCK1_HUMAN Dedicator of cytokinesis protein 1 | 33 |                       | LDHEVEGGRGDEQYK               | 1131 | 15 | 3 | 23.59 | b4b5y12               | 1731.77 | 36.868  | 6025   | 2 | 866.39 | -11.49 |
| Q14185 DOCK1_HUMAN Dedicator of cytokinesis protein 1 | 34 |                       | TGFPEIIMP GDVRNDIYVTLVQGD FDK | 412  | 27 | 5 | 25.16 | b8b13b14y3y13         | 3039.54 | 80.840  | 4916   | 5 | 608.71 | 9.48   |
| Q14185 DOCK1_HUMAN Dedicator of cytokinesis protein 1 | 35 |                       | YLQEHPAHEKIEK                 | 1549 | 14 | 8 | 53.81 | b4*b4b5b7*b7b9b10*b10 | 1750.86 | 52.232  | 4501   | 2 | 875.93 | -10.53 |
| Q14185 DOCK1_HUMAN Dedicator of cytokinesis protein 1 | 36 |                       | NDIYVTLVQGD FDKGSK            | 425  | 17 | 4 | 26.6  | b6y7y8y10             | 1898.92 | 48.802  | 3525   | 3 | 633.65 | -13.95 |
| Q14185 DOCK1_HUMAN Dedicator of cytokinesis protein 1 | 37 |                       | HRSSQDSK                      | 514  | 8  | 3 | 35.35 | b3y3y6                | 944.44  | 89.151  | 2282   | 1 | 944.44 | -13.25 |
| Q14185 DOCK1_HUMAN Dedicator of cytokinesis protein 1 | 38 | Carbamidomethyl+C(19) | TTSPPGDDIKNSPGQYIQCFTVKP K    | 1385 | 25 | 3 | 12.09 | b4b14y3               | 2778.37 | 58.331  | 2165   | 3 | 926.79 | -4.04  |
| Q14185 DOCK1_HUMAN Dedicator of cytokinesis protein 1 | 39 |                       | RPFVAVMDVTDIINGKV DDEDK       | 322  | 23 | 5 | 19.48 | b9y8*y8y13y15         | 2533.25 | 121.156 | 2134   | 3 | 845.09 | -3.28  |
| Q14185 DOCK1_HUMAN Dedicator of cytokinesis protein 1 | 40 | Phosphoryl STY(15)    | LEHVIFPGAGDEAISEYK            | 461  | 18 | 4 | 22.49 | b13*b13b14y4          | 2054.91 | 42.343  | 106883 | 3 | 685.64 | -13.07 |

|                                                       |    |                                                                     |                                     |      |    |    |       |                                     |         |         |        |   |         |        |
|-------------------------------------------------------|----|---------------------------------------------------------------------|-------------------------------------|------|----|----|-------|-------------------------------------|---------|---------|--------|---|---------|--------|
| Q14185 DOCK1_HUMAN Dedicator of cytokinesis protein 1 | 41 | Phosphoryl STY(7)                                                   | GIFPASYIHLKEAIVEGK                  | 57   | 18 | 3  | 22.49 | b6y13y14                            | 2052.05 | 79.501  | 12351  | 3 | 684.69  | -0.95  |
| Q14185 DOCK1_HUMAN Dedicator of cytokinesis protein 1 | 42 | Phosphoryl STY(7)                                                   | SQILSGTLPQDELK                      | 129  | 14 | 3  | 27.26 | y7y9y12                             | 1608.77 | 64.275  | 9452   | 2 | 804.89  | -4.02  |
| Q14185 DOCK1_HUMAN Dedicator of cytokinesis protein 1 | 43 | Carbamidomethyl+C(8);<br>Carbamidomethyl+C(22);<br>Phosphoryl STY() | SMQSLGSCTISKDSFQISTLVCSTK           | 587  | 25 | 4  | 18.25 | b5b10b12y12                         | 2845.28 | 72.483  | 4989   | 3 | 949.10  | 1.89   |
| Q14185 DOCK1_HUMAN Dedicator of cytokinesis protein 1 | 44 | Phosphoryl STY(5)                                                   | NVEVTVSVDYEDGKR                     | 446  | 15 | 3  | 17.57 | b6y9y13                             | 1789.82 | 81.547  | 4139   | 2 | 895.41  | 14.39  |
| Q14185 DOCK1_HUMAN Dedicator of cytokinesis protein 1 | 45 | Phosphoryl STY(12)                                                  | GADELSLQIGDVTVHILETYEGWYR           | 23   | 24 | 6  | 33.16 | b3_H3PO4<br>b3b10b11y3y6y12         | 2845.26 | 92.743  | 3548   | 3 | 949.09  | -12.44 |
| Q14185 DOCK1_HUMAN Dedicator of cytokinesis protein 1 | 46 | Oxidation+M(9)                                                      | IGEDAEVLSMLYDPVESK                  | 235  | 18 | 4  | 20.97 | b5b14y12y17                         | 2010.93 | 69.060  | 91513  | 3 | 670.98  | -11.53 |
| Q14185 DOCK1_HUMAN Dedicator of cytokinesis protein 1 | 47 | Oxidation+M(17)                                                     | SVFMVEISPLENAIETMQLTNDK             | 1480 | 23 | 3  | 12.68 | b5b8y4                              | 2625.30 | 63.681  | 7817   | 4 | 657.08  | 8.74   |
| Q14185 DOCK1_HUMAN Dedicator of cytokinesis protein 1 | 48 | Oxidation+M(9)                                                      | QIGFEIRDWYNLQGHK                    | 1060 | 17 | 7  | 32.92 | b3b7*b7b9b10*b10*b10                | 2151.05 | 107.926 | 5443   | 3 | 717.69  | 1.70   |
| Q14185 DOCK1_HUMAN Dedicator of cytokinesis protein 1 | 49 | Oxidation+M(8)                                                      | TGFPEIIMPGDVR                       | 412  | 13 | 3  | 29.26 | b4b6b10                             | 1447.72 | 66.136  | 2132   | 2 | 724.36  | -5.57  |
| Q14185 DOCK1_HUMAN Dedicator of cytokinesis protein 1 | 50 |                                                                     | EHPEAHEK                            | 1552 | 8  | 0  | 2.58  |                                     | 976.44  | 53.722  | 8173   | 2 | 488.72  | -10.13 |
| A6NNZ2 TBB8B_HUMAN Tubulin beta-8 chain B             | 1  |                                                                     | LAVNMVPPFR                          | 252  | 10 | 10 | 85.76 | b2b5*b5y4y5y6y7y8y9y10              | 1143.63 | 72.182  | 134998 | 2 | 572.32  | -5.34  |
| A6NNZ2 TBB8B_HUMAN Tubulin beta-8 chain B             | 2  | Carbamidomethyl+C(5);<br>Carbamidomethyl+C(7)                       | EAESCDCLQGFQLTHSLGGGTGS<br>GMGTLISK | 122  | 32 | 4  | 16.83 | y3y7y15y32                          | 3311.56 | 81.243  | 41273  | 3 | 1104.52 | 6.64   |
| A6NNZ2 TBB8B_HUMAN Tubulin beta-8 chain B             | 3  |                                                                     | IREEYPDR                            | 154  | 8  | 8  | 48.29 | b2b3b4b7*b7y1y4y8                   | 1077.53 | 24.134  | 32991  | 2 | 539.27  | 1.02   |
| A6NNZ2 TBB8B_HUMAN Tubulin beta-8 chain B             | 4  |                                                                     | YTEGAELTESVMDVVRK                   | 105  | 17 | 5  | 35.93 | b3b7b12b14*b14                      | 1926.96 | 81.458  | 5389   | 3 | 642.99  | 3.86   |
| A6NNZ2 TBB8B_HUMAN Tubulin beta-8 chain B             | 5  |                                                                     | YTEGAELTESVMDVVR                    | 105  | 16 | 5  | 24.32 | b4*b4b8*b8b13                       | 1798.82 | 47.071  | 2020   | 3 | 600.28  | -18.46 |
| A6NNZ2 TBB8B_HUMAN Tubulin beta-8 chain B             | 6  | Oxidation+M()                                                       | EVDEQMFNIQDK                        | 324  | 12 | 3  | 21.63 | b3y7y9                              | 1511.66 | 70.168  | 20373  | 2 | 756.33  | -5.41  |
| P60174 TPIS_HUMAN Triosephosphate isomerase           | 1  |                                                                     | VVLAYEPVWAI GTGK                    | 160  | 15 | 7  | 55.44 | b2b3b4b5y4y6y9                      | 1602.89 | 82.924  | 53379  | 2 | 801.95  | 2.13   |
| P60174 TPIS_HUMAN Triosephosphate isomerase           | 2  |                                                                     | ELASQPVDVDFLVGGASLKPEFV<br>DIINAK   | 219  | 29 | 10 | 34.02 | b2b3b5b6b9b15y2y3y24<br>y29         | 3029.58 | 95.417  | 36709  | 3 | 1010.53 | 0.56   |
| P60174 TPIS_HUMAN Triosephosphate isomerase           | 3  | Carbamidomethyl+C(9)                                                | VPADTEVVCAPPTAYIDFAR                | 33   | 20 | 7  | 39.96 | b5b7*b7b8b12b15y20                  | 2192.07 | 68.878  | 23030  | 3 | 731.36  | 1.45   |
| P60174 TPIS_HUMAN Triosephosphate isomerase           | 4  |                                                                     | TATPQQAQEVHEK                       | 175  | 13 | 13 | 91.03 | b2y2y3y4y5*y5y6*y6y7<br>y8*y8y11y13 | 1466.71 | 19.312  | 16471  | 3 | 489.58  | -8.32  |
| P60174 TPIS_HUMAN Triosephosphate isomerase           | 5  | Carbamidomethyl+C(12)                                               | IYGGSVTGATCK                        | 206  | 13 | 3  | 20.02 | b12y6y11                            | 1326.67 | 41.813  | 25425  | 2 | 663.84  | -0.64  |
| P60174 TPIS_HUMAN Triosephosphate isomerase           | 6  |                                                                     | VTNGAFTGEISPGMIK                    | 69   | 16 | 4  | 27.52 | b5y5y10y11                          | 1621.84 | 64.188  | 19590  | 2 | 811.42  | 7.08   |
| P60174 TPIS_HUMAN Triosephosphate isomerase           | 7  | Carbamidomethyl+C(24)                                               | SNVSDAVAQSTRIYGGSVTGATC<br>K        | 194  | 25 | 4  | 12.09 | b9*b9b14y12                         | 2542.25 | 66.075  | 47597  | 3 | 848.09  | -3.17  |
| P60174 TPIS_HUMAN Triosephosphate isomerase           | 8  | Carbamidomethyl+C(9);<br>Phosphoryl STY(13)                         | VPADTEVVCAPPTAYIDFAR                | 33   | 20 | 3  | 13.93 | b9b12y9                             | 2272.02 | 84.224  | 39432  | 3 | 758.01  | -1.50  |
| P60174 TPIS_HUMAN Triosephosphate isomerase           | 9  | Phosphoryl STY(11)                                                  | VTNGAFTGEISPGMIK                    | 69   | 16 | 7  | 36.78 | b3b4*b4b7b10y7*y7                   | 1701.77 | 36.886  | 1548   | 2 | 851.39  | -5.60  |
| P60174 TPIS_HUMAN Triosephosphate isomerase           | 10 |                                                                     | TPQQAQEVHEK                         | 177  | 11 | 1  | 7.35  | b3                                  | 1294.63 | 19.332  | 3625   | 2 | 647.82  | -8.11  |
| P60174 TPIS_HUMAN Triosephosphate isomerase           | 11 |                                                                     | PQQAQEVHEK                          | 178  | 10 | 2  | 16.1  | b3b7                                | 1193.60 | 19.334  | 1554   | 2 | 597.30  | 4.81   |

|                                                                          |    |                                             |                                  |     |    |    |       |                             |         |         |        |   |         |        |
|--------------------------------------------------------------------------|----|---------------------------------------------|----------------------------------|-----|----|----|-------|-----------------------------|---------|---------|--------|---|---------|--------|
| P60174 TPIS_HUMAN Triosephosphate isomerase                              | 12 |                                             | TATPQQAQEVHEK                    | 175 | 13 | 0  | 3.44  |                             | 1448.70 | 19.309  | 3992   | 3 | 483.57  | -4.80  |
| Q6NUK1 SCMC1_HUMAN Calcium-binding mitochondrial carrier protein SCaMC-1 | 1  |                                             | VLPAVGISYVVYENMK                 | 453 | 16 | 6  | 33.67 | b3b5y5y9*y9y11              | 1781.95 | 68.957  | 12945  | 3 | 594.66  | 0.21   |
| Q6NUK1 SCMC1_HUMAN Calcium-binding mitochondrial carrier protein SCaMC-1 | 2  |                                             | FWAYEQYK                         | 268 | 8  | 6  | 35.35 | b1b3b7*b7*b7y6              | 1134.53 | 46.963  | 10825  | 2 | 567.77  | 1.18   |
| Q6NUK1 SCMC1_HUMAN Calcium-binding mitochondrial carrier protein SCaMC-1 | 3  |                                             | MNIFGGFR                         | 231 | 8  | 6  | 48.29 | b5b6b7y2y5y8                | 941.45  | 41.694  | 8302   | 2 | 471.23  | -12.51 |
| Q6NUK1 SCMC1_HUMAN Calcium-binding mitochondrial carrier protein SCaMC-1 | 4  |                                             | NGDGVVDIGELQEGLR                 | 33  | 16 | 10 | 70.14 | b1*b1b8b9b12b13b14*b14b15y3 | 1670.83 | 66.097  | 5898   | 3 | 557.61  | -3.00  |
| Q6NUK1 SCMC1_HUMAN Calcium-binding mitochondrial carrier protein SCaMC-1 | 5  | Carbamidomethyl+C(10)                       | TGQYSGIYDCAK                     | 320 | 12 | 4  | 11.99 | b10*b10b12y4                | 1362.60 | 43.526  | 5032   | 2 | 681.80  | -1.43  |
| Q6NUK1 SCMC1_HUMAN Calcium-binding mitochondrial carrier protein SCaMC-1 | 6  | Carbamidomethyl+C(9)                        | DFVLPTAACQDAEQPTR                | 6   | 17 | 4  | 15.8  | b5b14y6*y6                  | 1918.90 | 87.766  | 3213   | 3 | 640.31  | 3.50   |
| Q6NUK1 SCMC1_HUMAN Calcium-binding mitochondrial carrier protein SCaMC-1 | 7  |                                             | SGQWWR                           | 190 | 6  | 2  | 13.37 | b4*b4                       | 819.39  | 28.694  | 11280  | 2 | 410.20  | 2.16   |
| Q6NUK1 SCMC1_HUMAN Calcium-binding mitochondrial carrier protein SCaMC-1 | 8  | Carbamidomethyl+C(13);Carbamidomethyl+C(20) | DSVNPVGMVLLGCGALSSTCGQLASYPLALVR | 378 | 32 | 4  | 21.29 | b8b9b12y14                  | 3305.62 | 77.252  | 8676   | 3 | 1102.55 | -14.18 |
| Q6NUK1 SCMC1_HUMAN Calcium-binding mitochondrial carrier protein SCaMC-1 | 9  |                                             | SYWLDNFAK                        | 369 | 9  | 8  | 74.6  | b4b5y3y4y5*y5*y5y7          | 1143.57 | 28.593  | 2634   | 2 | 572.29  | 18.89  |
| Q6NUK1 SCMC1_HUMAN Calcium-binding mitochondrial carrier protein SCaMC-1 | 10 |                                             | GITPNFMK                         | 445 | 8  | 4  | 32.34 | b3*b3y6y7                   | 907.46  | 42.202  | 2566   | 2 | 454.23  | -16.48 |
| Q6NUK1 SCMC1_HUMAN Calcium-binding mitochondrial carrier protein SCaMC-1 | 11 |                                             | DYFLFNPVTDIEIIR                  | 148 | 16 | 4  | 24.99 | b4b5*b5b10                  | 1984.01 | 104.446 | 1521   | 2 | 992.51  | 2.22   |
| Q6NUK1 SCMC1_HUMAN Calcium-binding mitochondrial carrier protein SCaMC-1 | 12 |                                             | FISGSMAGATAQTFIYPMEVMKTR         | 291 | 24 | 5  | 41.54 | b8b10b12b13b14              | 2637.32 | 96.659  | 17365  | 3 | 879.78  | 12.68  |
| Q6NUK1 SCMC1_HUMAN Calcium-binding mitochondrial carrier protein SCaMC-1 | 13 |                                             | KSGQWWR                          | 189 | 7  | 3  | 39.69 | b6y4y6                      | 947.49  | 40.087  | 14104  | 2 | 474.25  | 8.83   |
| Q6NUK1 SCMC1_HUMAN Calcium-binding mitochondrial carrier protein SCaMC-1 | 14 |                                             | IGTFERFISGSMAGATAQTFIYPMEVMK     | 285 | 28 | 6  | 19.73 | b9b14y5*y5y7y12             | 3083.46 | 107.741 | 7803   | 3 | 1028.49 | -14.25 |
| Q6NUK1 SCMC1_HUMAN Calcium-binding mitochondrial carrier protein SCaMC-1 | 15 | Carbamidomethyl+C(9)                        | DFVLPTAACQDAEQPTRYETLFAQALDR     | 6   | 27 | 4  | 24.79 | b5b6y3y9                    | 3155.49 | 110.465 | 6861   | 4 | 789.63  | -5.26  |
| Q6NUK1 SCMC1_HUMAN Calcium-binding mitochondrial carrier protein SCaMC-1 | 16 |                                             | SDKMNIFGGFR                      | 228 | 11 | 3  | 23.63 | b5y8y10                     | 1271.63 | 53.644  | 2550   | 2 | 636.32  | 5.28   |
| Q6NUK1 SCMC1_HUMAN Calcium-binding mitochondrial carrier protein SCaMC-1 | 17 | Oxidation+M(21)                             | FISGSMAGATAQTFIYPMEVMK           | 291 | 22 | 7  | 34.17 | b7b15*b15y4y8y10y18         | 2396.16 | 63.693  | 1821   | 4 | 599.80  | 10.29  |
| Q9BUF5 TBB6_HUMAN Tubulin beta-6 chain                                   | 1  |                                             | LAVNMVPPFR                       | 252 | 10 | 10 | 85.76 | b2b5*b5y4y5y6y7y8y9y10      | 1143.63 | 72.182  | 134998 | 2 | 572.32  | -5.34  |
| Q9BUF5 TBB6_HUMAN Tubulin beta-6 chain                                   | 2  |                                             | NSSYFVEWIPNNVK                   | 336 | 14 | 8  | 18.69 | b1b2b9*b9y2y8y12y14         | 1696.85 | 80.568  | 64158  | 2 | 848.93  | 8.27   |

|                                                 |    |                                             |                                            |     |    |    |       |                                    |         |         |        |   |         |        |
|-------------------------------------------------|----|---------------------------------------------|--------------------------------------------|-----|----|----|-------|------------------------------------|---------|---------|--------|---|---------|--------|
| Q9BUF5 TBB6_HUMAN Tubulin beta-6 chain          | 3  | Carbamidomethyl+C(27);Carbamidomethyl+C(37) | VSDTVVEPYNATLSVHQLVENTD<br>ETYPDNEALYDICFR | 174 | 39 | 10 | 23.76 | b6b8b12°b12°b12b13y1<br>y7y9°y9    | 4593.04 | 89.055  | 41967  | 6 | 766.35  | -14.56 |
| Q9BUF5 TBB6_HUMAN Tubulin beta-6 chain          | 4  | Carbamidomethyl+C(4)                        | VAVCDIPPR                                  | 350 | 9  | 3  | 29.76 | b3y7y8                             | 1026.55 | 62.978  | 6893   | 2 | 513.78  | 11.30  |
| Q9BUF5 TBB6_HUMAN Tubulin beta-6 chain          | 5  |                                             | MASTFIGNSTAIQELFK                          | 362 | 17 | 4  | 26.6  | b7b14b15y3                         | 1857.95 | 92.795  | 6628   | 2 | 929.48  | 4.73   |
| Q9BUF5 TBB6_HUMAN Tubulin beta-6 chain          | 6  |                                             | AALVDLEPGTMDSVR                            | 62  | 15 | 3  | 17.57 | b12y9y13                           | 1573.76 | 62.127  | 2811   | 3 | 525.26  | -21.49 |
| Q9BUF5 TBB6_HUMAN Tubulin beta-6 chain          | 7  | Carbamidomethyl+C(12)                       | MREIVHIQAGQCGNQIGTK                        | 0   | 19 | 3  | 14.47 | b8y10y15                           | 2140.07 | 85.985  | 8335   | 3 | 714.03  | -3.42  |
| Q9BUF5 TBB6_HUMAN Tubulin beta-6 chain          | 8  |                                             | GPMSMKEVDEQMLAIQSK                         | 318 | 18 | 4  | 24.05 | b13y10y12y17                       | 2021.96 | 63.034  | 6662   | 3 | 674.66  | -3.86  |
| Q9BUF5 TBB6_HUMAN Tubulin beta-6 chain          | 9  | Oxidation+M(11)                             | AALVDLEPGTMDSVR                            | 62  | 15 | 3  | 17.57 | b7b13y11                           | 1589.79 | 56.588  | 15721  | 2 | 795.40  | 3.53   |
| Q9BUF5 TBB6_HUMAN Tubulin beta-6 chain          | 10 | Carbamidomethyl+C(12);Oxidation+M(1)        | MREIVHIQAGQCGNQIGTK                        | 0   | 19 | 5  | 25.13 | b14°b14y11y12y15                   | 2156.07 | 75.611  | 9472   | 4 | 539.77  | -1.81  |
| Q9BUF5 TBB6_HUMAN Tubulin beta-6 chain          | 11 | Oxidation+M(8)                              | ISEQFSAMFRR                                | 380 | 11 | 5  | 35.39 | b4b5°b5b6°b6                       | 1387.69 | 100.425 | 3926   | 2 | 694.35  | 9.76   |
| Q9BUF5 TBB6_HUMAN Tubulin beta-6 chain          | 12 | Oxidation+M()                               | EVDEQMLAIQSK                               | 324 | 12 | 6  | 51.49 | b4b5b9b10y10°y10                   | 1406.69 | 92.835  | 1693   | 2 | 703.85  | 3.56   |
| P34931 HS71L_HUMAN Heat shock 70 kDa protein 1L | 1  |                                             | VEIANDQGNR                                 | 27  | 11 | 9  | 69.44 | b2b3y4*y4y6y7y8y9y11               | 1228.62 | 35.756  | 62859  | 2 | 614.82  | -2.68  |
| P34931 HS71L_HUMAN Heat shock 70 kDa protein 1L | 2  | Carbamidomethyl+C(14)                       | GIAIGIDLTTYSCVGVFQH GK                     | 5   | 22 | 3  | 13.05 | b5b17y10                           | 2293.16 | 96.906  | 3371   | 3 | 765.06  | 0.00   |
| P34931 HS71L_HUMAN Heat shock 70 kDa protein 1L | 3  | Carbamidomethyl+C(1)                        | CNELLSWLEVNQLAEKDFDHK                      | 575 | 22 | 3  | 22.92 | y5y10y11                           | 2717.30 | 113.042 | 2855   | 3 | 906.44  | 3.86   |
| P34931 HS71L_HUMAN Heat shock 70 kDa protein 1L | 4  |                                             | SINPDEAVAYGAAVQAAILMGDK                    | 363 | 23 | 4  | 12.68 | b5y4y12*y12                        | 2304.12 | 69.133  | 110691 | 4 | 576.78  | -16.42 |
| P34931 HS71L_HUMAN Heat shock 70 kDa protein 1L | 5  |                                             | ETA EAF LGHPVTNAVITVPAYFND<br>SQR          | 130 | 27 | 5  | 20.39 | b3b23y8y10y20                      | 2947.49 | 105.465 | 12938  | 3 | 983.17  | 9.61   |
| P34931 HS71L_HUMAN Heat shock 70 kDa protein 1L | 6  | Carbamidomethyl+C(6);Carbamidomethyl+C(11)  | LYQGGCTGPACGTGYVPRPATG<br>PTIEEVD          | 611 | 30 | 11 | 45.8  | b4b7°b7b9y4y6°y6y10y<br>11°y11y12  | 3080.47 | 110.589 | 10246  | 3 | 1027.50 | 21.32  |
| P34931 HS71L_HUMAN Heat shock 70 kDa protein 1L | 7  |                                             | LVSHFVEEFK                                 | 238 | 10 | 4  | 27.97 | b8b9°b9y4                          | 1234.66 | 43.534  | 8390   | 3 | 412.23  | 14.73  |
| P34931 HS71L_HUMAN Heat shock 70 kDa protein 1L | 8  |                                             | ISESDK                                     | 563 | 6  | 1  | 13.37 | y3                                 | 678.33  | 30.201  | 5197   | 1 | 678.33  | -1.80  |
| P34931 HS71L_HUMAN Heat shock 70 kDa protein 1L | 9  |                                             | AFYP E EISSMVLTK                           | 114 | 14 | 5  | 29.87 | b13°b13y6y12y13                    | 1614.79 | 70.999  | 4033   | 3 | 538.94  | -10.43 |
| P34931 HS71L_HUMAN Heat shock 70 kDa protein 1L | 10 |                                             | NALESYAFNMK                                | 541 | 11 | 11 | 63.42 | b3b4°b4°b4b5°b5y4y9y<br>10°y10*y10 | 1287.60 | 66.132  | 2883   | 2 | 644.30  | -3.32  |
| P34931 HS71L_HUMAN Heat shock 70 kDa protein 1L | 11 |                                             | NQVAMNPQNTVFD AK                           | 58  | 15 | 4  | 28.59 | b6y3y6y13                          | 1676.77 | 70.576  | 2196   | 3 | 559.60  | -19.73 |
| P34931 HS71L_HUMAN Heat shock 70 kDa protein 1L | 12 |                                             | ATAGDTHLGGEDFDNR                           | 222 | 16 | 3  | 16.61 | b4y3y8                             | 1675.73 | 93.505  | 1884   | 2 | 838.37  | 0.29   |
| P34931 HS71L_HUMAN Heat shock 70 kDa protein 1L | 13 |                                             | TTPSYVAFTDTER                              | 38  | 13 | 3  | 20.02 | b9b11y9                            | 1487.71 | 62.305  | 1538   | 2 | 744.36  | 3.36   |
| P34931 HS71L_HUMAN Heat shock 70 kDa protein 1L | 14 |                                             | ATAGDTHLGGEDFDNRLVSHFVE<br>EFK             | 222 | 26 | 6  | 38.68 | b10°b10b11b14b15y7                 | 2891.36 | 66.081  | 38180  | 3 | 964.46  | -1.52  |
| P34931 HS71L_HUMAN Heat shock 70 kDa protein 1L | 15 |                                             | SVVSDEGLK GK                               | 552 | 11 | 3  | 35.39 | b6b8b10                            | 1118.60 | 25.683  | 14887  | 2 | 559.81  | -1.75  |
| P34931 HS71L_HUMAN Heat shock 70 kDa protein 1L | 16 |                                             | SINPDEAVAYGAAVQAAILMGDK<br>SEK             | 363 | 26 | 5  | 21.1  | b3b5b9y6y15                        | 2648.34 | 55.542  | 13500  | 4 | 662.84  | 4.52   |
| P34931 HS71L_HUMAN Heat shock 70 kDa protein 1L | 17 |                                             | ETA EAF LGHPVTNAVITVPAYFND<br>SQRQATK      | 130 | 31 | 4  | 11.09 | b9°b9b14y30                        | 3375.65 | 85.906  | 9155   | 5 | 675.94  | -13.38 |
| P34931 HS71L_HUMAN Heat shock 70 kDa protein 1L | 18 |                                             | NALESYAFNMKSVVSDEGLK                       | 541 | 20 | 5  | 29.64 | b6b7b13y9y14                       | 2202.07 | 58.253  | 7545   | 2 | 1101.54 | -1.11  |

|                                                         |    |                      |                                    |     |    |    |       |                                                 |         |         |        |   |         |        |
|---------------------------------------------------------|----|----------------------|------------------------------------|-----|----|----|-------|-------------------------------------------------|---------|---------|--------|---|---------|--------|
| IP34931 HS71L_HUMAN Heat shock 70 kDa protein 1L        | 19 | Carbamidomethyl+C(1) | CNELLSWLEVNQLAEKDEFDHK             | 575 | 22 | 4  | 13.05 | b13y3°y3y7                                      | 2717.31 | 100.719 | 2724   | 3 | 906.44  | 7.10   |
| IP34931 HS71L_HUMAN Heat shock 70 kDa protein 1L        | 20 |                      | KFNDPVVQADMK                       | 78  | 12 | 7  | 45.96 | b4°b4b9y5y8°y8y11                               | 1391.70 | 54.857  | 2376   | 2 | 696.35  | 0.09   |
| IP34931 HS71L_HUMAN Heat shock 70 kDa protein 1L        | 21 |                      | LLQDYFNDRDLNK                      | 350 | 13 | 3  | 20.02 | b9y10y12                                        | 1595.80 | 64.305  | 2287   | 2 | 798.40  | -10.86 |
| IP34931 HS71L_HUMAN Heat shock 70 kDa protein 1L        | 22 |                      | DLNKSINPDEAVAYGAAVQAAILMGDK        | 359 | 27 | 12 | 53.32 | b4°b4b7b8°b8b9b18y3°y3y5°y5y6                   | 2774.41 | 136.480 | 1719   | 3 | 925.47  | 1.76   |
| IP34931 HS71L_HUMAN Heat shock 70 kDa protein 1L        | 23 | Phosphoryl STY(13)   | AFYPEEISSMVLTK                     | 114 | 14 | 8  | 49.06 | b7_H3PO4<br>b7b12°b12b13_HPO3<br>b13y4°y4y10y11 | 1694.78 | 56.465  | 643371 | 3 | 565.60  | 10.59  |
| IP34931 HS71L_HUMAN Heat shock 70 kDa protein 1L        | 24 | Oxidation+M(5)       | NQVAMNPQNTVFDKAK                   | 58  | 15 | 5  | 35.97 | b7b11b13y10y13                                  | 1692.80 | 49.874  | 19079  | 2 | 846.91  | 2.24   |
| IP34931 HS71L_HUMAN Heat shock 70 kDa protein 1L        | 25 | Oxidation+M(10)      | NALESYAFNMK                        | 541 | 11 | 3  | 23.63 | b9y3y10                                         | 1303.61 | 76.312  | 7449   | 1 | 1303.61 | 11.52  |
| IP54652 HSP72_HUMAN Heat shock-related 70 kDa protein 2 | 1  |                      | VEIANDQGNR                         | 26  | 11 | 9  | 69.44 | b2b3y4*y4y6y7y8y9y11                            | 1228.62 | 35.756  | 62859  | 2 | 614.82  | -2.68  |
| IP54652 HSP72_HUMAN Heat shock-related 70 kDa protein 2 | 2  |                      | NQVAMNPNTTIFDAKR                   | 57  | 16 | 4  | 16.61 | b12y4y11y16                                     | 1819.94 | 66.368  | 62375  | 3 | 607.32  | 13.88  |
| IP54652 HSP72_HUMAN Heat shock-related 70 kDa protein 2 | 3  |                      | FEELNADLFR                         | 304 | 10 | 4  | 26.21 | b9y6y8y10                                       | 1253.62 | 73.732  | 22752  | 2 | 627.31  | -0.29  |
| IP54652 HSP72_HUMAN Heat shock-related 70 kDa protein 2 | 4  |                      | LYQGGPGGGSGGGSGASGGPTIEEVD         | 612 | 27 | 4  | 14.79 | b17b19y12y18                                    | 2320.04 | 64.706  | 2453   | 3 | 774.02  | 4.21   |
| IP54652 HSP72_HUMAN Heat shock-related 70 kDa protein 2 | 5  |                      | TLSSSTQASIEIDSLYEGVDFYTSITR        | 275 | 27 | 3  | 17.72 | b8b12b15                                        | 2983.39 | 76.274  | 38442  | 5 | 597.48  | -19.07 |
| IP54652 HSP72_HUMAN Heat shock-related 70 kDa protein 2 | 6  |                      | MVSHLAEFEK                         | 239 | 10 | 4  | 27.97 | b7°b7b8y5                                       | 1190.56 | 41.709  | 24449  | 2 | 595.79  | -19.48 |
| IP54652 HSP72_HUMAN Heat shock-related 70 kDa protein 2 | 7  |                      | EIAEAYLGGK                         | 129 | 10 | 3  | 40.98 | b3b6b8                                          | 1050.54 | 98.529  | 5061   | 1 | 1050.54 | -2.56  |
| IP54652 HSP72_HUMAN Heat shock-related 70 kDa protein 2 | 8  |                      | NALESYTYNIK                        | 542 | 11 | 6  | 23.63 | b5°b5b9y8°y8*y8                                 | 1315.65 | 37.665  | 4689   | 2 | 658.33  | 0.09   |
| IP54652 HSP72_HUMAN Heat shock-related 70 kDa protein 2 | 9  |                      | QTQFTTYSNDQSSVLVQVYEGE R           | 426 | 24 | 3  | 12.37 | b10y5y10                                        | 2780.32 | 110.454 | 2173   | 3 | 927.45  | 8.52   |
| IP54652 HSP72_HUMAN Heat shock-related 70 kDa protein 2 | 10 |                      | NQVAMNPNTTIFDAK                    | 57  | 15 | 6  | 35.97 | b7b13°b13y3y11y14                               | 1663.83 | 79.595  | 1990   | 3 | 555.28  | 11.52  |
| IP54652 HSP72_HUMAN Heat shock-related 70 kDa protein 2 | 11 |                      | MVQEAERYK                          | 520 | 9  | 4  | 29.76 | b7°b7y3y6                                       | 1153.56 | 22.750  | 11121  | 3 | 385.19  | -4.55  |
| IP54652 HSP72_HUMAN Heat shock-related 70 kDa protein 2 | 12 |                      | VQVEYKGETK                         | 103 | 10 | 4  | 38.36 | b5b8y4y8                                        | 1180.62 | 45.367  | 10386  | 2 | 590.81  | -3.83  |
| IP54652 HSP72_HUMAN Heat shock-related 70 kDa protein 2 | 13 | Carbamidomethyl+C(2) | VCNPIISKLYQGGPGGGSGGGSGASGGPTIEEVD | 604 | 35 | 6  | 25.25 | y7°y7y11°y11y12y19                              | 3231.48 | 82.203  | 7961   | 3 | 1077.83 | -12.77 |
| IP54652 HSP72_HUMAN Heat shock-related 70 kDa protein 2 | 14 |                      | ARFEELNADLFR                       | 302 | 12 | 3  | 28.83 | b7b9b10                                         | 1480.74 | 69.485  | 6615   | 3 | 494.25  | -11.13 |
| IP54652 HSP72_HUMAN Heat shock-related 70 kDa protein 2 | 15 |                      | NALESYTYNIKQTVDEK                  | 542 | 18 | 3  | 15.09 | b4b8y10                                         | 2145.03 | 95.348  | 6574   | 3 | 715.68  | -1.25  |
| IP54652 HSP72_HUMAN Heat shock-related 70 kDa protein 2 | 16 |                      | TTPSYVAFTDTERLIGDAK                | 37  | 20 | 6  | 31.21 | b3b5b6b11°b11y11                                | 2156.08 | 90.698  | 5878   | 3 | 719.37  | -2.72  |
| IP54652 HSP72_HUMAN Heat shock-related 70 kDa protein 2 | 17 |                      | NQMAEKDEYEHK                       | 586 | 12 | 5  | 28.83 | y5°y5y8y9°y9                                    | 1521.68 | 45.181  | 5201   | 2 | 761.34  | 10.19  |
| IP54652 HSP72_HUMAN Heat shock-related 70 kDa protein 2 | 18 |                      | RTLSSSTQASIEIDSLYEGVDFYTSITR       | 274 | 28 | 7  | 14.39 | b5°b5b8°b8°b8y6y11                              | 3139.52 | 110.503 | 4809   | 3 | 1047.18 | -5.75  |
| IP54652 HSP72_HUMAN Heat shock-related 70 kDa protein 2 | 19 |                      | NQVAMNPNTTIFDAKR                   | 57  | 16 | 7  | 36.55 | b12°b12°b12b13b14°b14y15                        | 1819.90 | 90.784  | 4749   | 2 | 910.46  | -4.09  |
| IP54652 HSP72_HUMAN Heat shock-related 70 kDa protein 2 | 20 |                      | LIGDAAKNQVAMNPNTTIFDAK             | 50  | 22 | 3  | 13.05 | b12y3y9                                         | 2332.18 | 119.287 | 4166   | 3 | 778.06  | -7.85  |
| IP54652 HSP72_HUMAN Heat shock-related 70 kDa protein 2 | 21 |                      | KFEDATVQSDMK                       | 77  | 12 | 9  | 39.34 | b7°b7y6y7°y7°y7y8°y8°y8                         | 1398.66 | 40.092  | 3766   | 2 | 699.84  | 4.36   |

|                                                        |    |                                             |                                                              |     |    |    |       |                        |         |         |        |   |         |        |
|--------------------------------------------------------|----|---------------------------------------------|--------------------------------------------------------------|-----|----|----|-------|------------------------|---------|---------|--------|---|---------|--------|
| P54652 HSP72_HUMAN Heat shock-related 70 kDa protein 2 | 22 | Carbamidomethyl+C(14);Phosphoryl STY(10)    | GPAIGIDLGTYSVGVFQHGK                                         | 4   | 22 | 6  | 26.25 | b11°b11b12y7y12°y12    | 2357.10 | 102.189 | 6568   | 3 | 786.37  | 3.21   |
| P54652 HSP72_HUMAN Heat shock-related 70 kDa protein 2 | 23 | Oxidation+M(1)                              | MVSHLAEEFKR                                                  | 239 | 11 | 6  | 54.74 | b5°b5b6b7b8y5          | 1362.70 | 71.176  | 3116   | 1 | 1362.70 | 12.90  |
| Q13418 ILK_HUMAN Integrin-linked protein kinase        | 1  |                                             | FDMIVPILEK                                                   | 438 | 10 | 6  | 56.07 | b2b3b4y5y6y7           | 1204.66 | 87.987  | 46232  | 2 | 602.83  | -1.93  |
| Q13418 ILK_HUMAN Integrin-linked protein kinase        | 2  | Carbamidomethyl+C(18);Carbamidomethyl+C(39) | ADINAVNEHG NVPLHYACFWGQ<br>DQVAEDLVANGALVSICNK               | 90  | 41 | 4  | 36.38 | b6y4y5y6               | 4509.15 | 89.887  | 10728  | 4 | 1128.04 | 3.57   |
| Q13418 ILK_HUMAN Integrin-linked protein kinase        | 3  |                                             | YGEMPVDK                                                     | 131 | 8  | 3  | 32.34 | b4y4y5                 | 938.43  | 33.878  | 41200  | 2 | 469.72  | 1.76   |
| Q13418 ILK_HUMAN Integrin-linked protein kinase        | 4  |                                             | EVPFADLSNMEIGMK                                              | 388 | 15 | 4  | 25.65 | y5y6°y6y13             | 1680.81 | 83.961  | 31632  | 2 | 840.91  | 8.72   |
| Q13418 ILK_HUMAN Integrin-linked protein kinase        | 5  | Carbamidomethyl+C(14)                       | IFSHPNVLPVLGACQSPPHPTLI<br>THWMPYGS LYNVLHEGTNFVVD<br>QSQAVK | 243 | 53 | 5  | 25.36 | b4b5y7°y7y13           | 5863.89 | 100.782 | 17064  | 6 | 978.15  | -10.41 |
| Q13418 ILK_HUMAN Integrin-linked protein kinase        | 6  | Carbamidomethyl+C(19)                       | VALEGLRPTIPPGISPHVCK                                         | 403 | 20 | 3  | 23.35 | y6y9y10                | 2141.18 | 131.991 | 16495  | 2 | 1071.10 | -2.74  |
| Q13418 ILK_HUMAN Integrin-linked protein kinase        | 7  |                                             | GDDTPLHLAASHGHR                                              | 65  | 15 | 5  | 28.59 | b7b9b10y7°y7           | 1583.76 | 34.568  | 16128  | 3 | 528.59  | -5.86  |
| Q13418 ILK_HUMAN Integrin-linked protein kinase        | 8  | Carbamidomethyl+C(34)                       | EVPFADLSNMEIGMKVALEGLRP<br>TIPPGISPHVCK                      | 388 | 35 | 4  | 14.75 | b3y4y10y17             | 3802.95 | 116.135 | 13596  | 4 | 951.49  | -5.46  |
| Q13418 ILK_HUMAN Integrin-linked protein kinase        | 9  | Carbamidomethyl+C(8)                        | SRDFNEECPR                                                   | 231 | 10 | 6  | 39.15 | b4b6°b6b7°b7y9         | 1309.56 | 24.779  | 3543   | 2 | 655.28  | 1.96   |
| Q13418 ILK_HUMAN Integrin-linked protein kinase        | 10 |                                             | KPEDNRR                                                      | 363 | 8  | 3  | 35.35 | b5b7y7                 | 1015.54 | 41.691  | 2873   | 2 | 508.27  | 7.33   |
| Q13418 ILK_HUMAN Integrin-linked protein kinase        | 11 | Carbamidomethyl+C(6)                        | DFNEECPLLR                                                   | 233 | 10 | 4  | 40.98 | y3y7y9°y9              | 1335.60 | 42.215  | 2263   | 2 | 668.31  | -5.21  |
| Q13418 ILK_HUMAN Integrin-linked protein kinase        | 12 |                                             | HALNSRSVMIDEDMTAR                                            | 317 | 17 | 3  | 23.2  | y5y11y13               | 1945.93 | 89.037  | 2135   | 2 | 973.47  | 4.83   |
| Q13418 ILK_HUMAN Integrin-linked protein kinase        | 13 |                                             | FDMIVPILEKMQDK                                               | 438 | 14 | 3  | 24.13 | b5b6y4                 | 1706.87 | 90.818  | 1910   | 3 | 569.63  | -7.58  |
| P07195 LDHB_HUMAN L-lactate dehydrogenase B chain      | 1  | Carbamidomethyl+C(6)                        | VIGSGCNLDSAR                                                 | 158 | 12 | 9  | 93.61 | b2y3y4y5y6y8y10y11y12  | 1248.60 | 35.211  | 54515  | 2 | 624.80  | 0.39   |
| P07195 LDHB_HUMAN L-lactate dehydrogenase B chain      | 2  |                                             | IVADKDYSVTANSK                                               | 77  | 14 | 4  | 26.47 | b2y8y9y12              | 1510.77 | 31.633  | 51492  | 3 | 504.26  | -2.59  |
| P07195 LDHB_HUMAN L-lactate dehydrogenase B chain      | 3  |                                             | LIAPVAEEEATVPNNK                                             | 7   | 16 | 3  | 16.61 | b12y4y14               | 1694.90 | 52.475  | 26325  | 2 | 847.95  | 3.31   |
| P07195 LDHB_HUMAN L-lactate dehydrogenase B chain      | 4  |                                             | GLTSVINQK                                                    | 299 | 9  | 3  | 29.76 | b7y5y7                 | 959.55  | 44.092  | 18296  | 2 | 480.28  | -3.63  |
| P07195 LDHB_HUMAN L-lactate dehydrogenase B chain      | 5  |                                             | SADTLWDIQK                                                   | 319 | 10 | 3  | 26.21 | b4b6y8                 | 1176.58 | 62.262  | 4590   | 1 | 1176.58 | -7.57  |
| P07195 LDHB_HUMAN L-lactate dehydrogenase B chain      | 6  |                                             | ADKDYSVTANSK                                                 | 79  | 12 | 2  | 7.27  | b4°b4                  | 1298.64 | 31.616  | 3998   | 2 | 649.82  | 11.84  |
| Q99867 TBB4Q_HUMAN Putative tubulin beta-4q chain      | 1  |                                             | LAVNMVFPFR                                                   | 252 | 10 | 10 | 85.76 | b2b5°b5y4y5y6y7y8y9y10 | 1143.63 | 72.182  | 134998 | 2 | 572.32  | -5.34  |
| Q99867 TBB4Q_HUMAN Putative tubulin beta-4q chain      | 2  |                                             | IREEYPDR                                                     | 154 | 8  | 8  | 48.29 | b2b3b4b7°b7y1y4y8      | 1077.53 | 24.134  | 32991  | 2 | 539.27  | 1.02   |
| Q99867 TBB4Q_HUMAN Putative tubulin beta-4q chain      | 3  |                                             | MSVTFTGNNTAVQELK                                             | 362 | 16 | 3  | 23.15 | b5y3y4                 | 1739.84 | 83.846  | 12795  | 3 | 580.62  | -11.58 |
| Q99867 TBB4Q_HUMAN Putative tubulin beta-4q chain      | 4  |                                             | INVHHHEASGGR                                                 | 46  | 12 | 5  | 31.26 | b5°b5b10y4y8           | 1313.65 | 37.619  | 8116   | 3 | 438.56  | 3.53   |
| Q99867 TBB4Q_HUMAN Putative tubulin beta-4q chain      | 5  |                                             | SGPFAEVFRPDNFISR                                             | 77  | 16 | 3  | 16.61 | b3b13y11               | 1838.95 | 65.295  | 4690   | 2 | 919.98  | 15.20  |
| Q99867 TBB4Q_HUMAN Putative tubulin beta-4q chain      | 6  |                                             | LHFFMPGFAPLTSQGSQQYR                                         | 262 | 20 | 6  | 19.04 | b7b10y12°y12*y12y15    | 2312.09 | 72.373  | 3745   | 2 | 1156.55 | -16.05 |
| Q99867 TBB4Q_HUMAN Putative tubulin beta-4q chain      | 7  | Carbamidomethyl+C(3)                        | HGCYLTA A A IFR                                              | 306 | 12 | 4  | 43.99 | b6b8b9b10              | 1379.70 | 36.869  | 2276   | 2 | 690.35  | 5.13   |



|                                                     |    |                       |                                |     |    |    |       |                                                        |         |         |        |   |         |        |
|-----------------------------------------------------|----|-----------------------|--------------------------------|-----|----|----|-------|--------------------------------------------------------|---------|---------|--------|---|---------|--------|
| Q99867 TBB4Q_HUMAN Putative tubulin beta-4q chain   | 8  |                       | ALTVAELTQQMFDAKNMMAAR          | 282 | 21 | 7  | 37.62 | b13y6y9y10y11 <sup>o</sup> y11*y11                     | 2340.12 | 73.438  | 25017  | 3 | 780.71  | -12.31 |
| Q99867 TBB4Q_HUMAN Putative tubulin beta-4q chain   | 9  | Carbamidomethyl+C(18) | SGPFAEVFRPDNFSRQCGAGNNWAK      | 77  | 26 | 8  | 30.01 | b5 <sup>o</sup> b5b9b12 <sup>o</sup> b12b13y8y19       | 2925.37 | 83.526  | 16441  | 4 | 732.10  | -5.84  |
| Q99867 TBB4Q_HUMAN Putative tubulin beta-4q chain   | 10 |                       | GRYTEGAELMESVMDVVR             | 103 | 18 | 7  | 48.09 | b5b6b11b15b16y11 <sup>o</sup> y11                      | 2041.99 | 80.626  | 4532   | 2 | 1021.50 | 8.43   |
| Q99867 TBB4Q_HUMAN Putative tubulin beta-4q chain   | 11 |                       | RVSEQFTATFR                    | 378 | 11 | 5  | 30.62 | b4 <sup>o</sup> b4b5* <sup>o</sup> b5b8                | 1341.68 | 58.239  | 2834   | 2 | 671.34  | -6.46  |
| Q99867 TBB4Q_HUMAN Putative tubulin beta-4q chain   | 12 | Phosphoryl STY(10)    | MSVFTFGNNTAVQELK               | 362 | 16 | 6  | 34.34 | b6b7b9y8 <sup>o</sup> y8y10                            | 1819.80 | 104.446 | 1611   | 2 | 910.40  | -12.14 |
| Q99867 TBB4Q_HUMAN Putative tubulin beta-4q chain   | 13 | Oxidation+M(5)        | LHFFMPGFAPLTSQGSQQYR           | 262 | 20 | 3  | 22.06 | b5y7y8                                                 | 2328.12 | 34.594  | 2667   | 3 | 776.71  | -3.25  |
| Q3ZCM7 TBB8_HUMAN Tubulin beta-8 chain              | 1  |                       | LAVNMVPPFR                     | 252 | 10 | 10 | 85.76 | b2b5 <sup>o</sup> *b5y4y5y6y7y8y9y10                   | 1143.63 | 72.182  | 134998 | 2 | 572.32  | -5.34  |
| Q3ZCM7 TBB8_HUMAN Tubulin beta-8 chain              | 2  |                       | IREEYPDR                       | 154 | 8  | 8  | 48.29 | b2b3b4b7 <sup>o</sup> b7y1y4y8                         | 1077.53 | 24.134  | 32991  | 2 | 539.27  | 1.02   |
| Q3ZCM7 TBB8_HUMAN Tubulin beta-8 chain              | 3  |                       | FWEVISDEHAIDSAGTYHGDSLQLER     | 19  | 27 | 6  | 20.39 | b3b8y8 <sup>o</sup> *y8y10y13                          | 3112.39 | 93.702  | 44901  | 4 | 778.85  | -14.98 |
| Q3ZCM7 TBB8_HUMAN Tubulin beta-8 chain              | 4  |                       | MSATFIGNNTAIQELFK              | 362 | 17 | 7  | 47.62 | b5b7b8 <sup>o</sup> b8b12b13 <sup>o</sup> b13          | 1884.97 | 96.806  | 3438   | 2 | 942.99  | 11.01  |
| Q3ZCM7 TBB8_HUMAN Tubulin beta-8 chain              | 5  |                       | AVLVDLEPGTMDSVR                | 62  | 15 | 5  | 51.23 | y6y7y9y12y13                                           | 1601.79 | 94.041  | 2557   | 2 | 801.40  | -18.75 |
| Q3ZCM7 TBB8_HUMAN Tubulin beta-8 chain              | 6  |                       | MSATFIGNNTAIQELFKR             | 362 | 18 | 3  | 22.25 | b3b10b16                                               | 2041.04 | 71.267  | 52119  | 3 | 681.02  | -7.78  |
| Q3ZCM7 TBB8_HUMAN Tubulin beta-8 chain              | 7  |                       | EVDEQMFNIQDKNSSYFADWLPNVVK     | 324 | 26 | 6  | 25.01 | b12b13 <sup>o</sup> b13y8 <sup>o</sup> *y8y11          | 3131.46 | 110.506 | 18585  | 4 | 783.62  | 5.15   |
| Q3ZCM7 TBB8_HUMAN Tubulin beta-8 chain              | 8  |                       | RVSEQFTAMFR                    | 379 | 11 | 3  | 23.63 | b7y5y8                                                 | 1371.70 | 93.375  | 5468   | 2 | 686.36  | 14.59  |
| Q3ZCM7 TBB8_HUMAN Tubulin beta-8 chain              | 9  | Carbamidomethyl+C(6)  | NMMAACDPRHGR                   | 297 | 12 | 6  | 53.25 | b9y8y9y10 <sup>o</sup> y10y11                          | 1415.61 | 30.863  | 1541   | 2 | 708.31  | -2.41  |
| Q3ZCM7 TBB8_HUMAN Tubulin beta-8 chain              | 10 | Oxidation+M()         | ALTVAELTQQMFDAK                | 282 | 15 | 6  | 35.97 | b5b10b14y3 <sup>o</sup> y3y6                           | 1681.87 | 85.378  | 36575  | 3 | 561.30  | 14.15  |
| Q3ZCM7 TBB8_HUMAN Tubulin beta-8 chain              | 11 | Oxidation+M(1)        | MPMREVEDEQMFNIQDK              | 320 | 16 | 3  | 16.61 | b4b10y8                                                | 2026.93 | 45.101  | 1963   | 2 | 1013.97 | 13.97  |
| P11021 GRP78_HUMAN 78 kDa glucose-regulated protein | 1  |                       | VEIANDQGNR                     | 49  | 11 | 9  | 69.44 | b2b3y4 <sup>o</sup> *y4y6y7y8y9y11                     | 1228.62 | 35.756  | 62859  | 2 | 614.82  | -2.68  |
| P11021 GRP78_HUMAN 78 kDa glucose-regulated protein | 2  |                       | LYGSAGPPPTGEEDTAEKDEL          | 633 | 21 | 3  | 13.46 | b3b15y6                                                | 2175.99 | 88.629  | 4218   | 3 | 726.00  | 0.67   |
| P11021 GRP78_HUMAN 78 kDa glucose-regulated protein | 3  |                       | AVEEK                          | 596 | 5  | 3  | 25.88 | b4y4 <sup>o</sup> y4                                   | 575.31  | 24.542  | 14767  | 1 | 575.31  | 6.68   |
| P11021 GRP78_HUMAN 78 kDa glucose-regulated protein | 4  |                       | IEWLESHQDADIEDFK               | 601 | 16 | 9  | 65.12 | b9b10 <sup>o</sup> *b10b12 <sup>o</sup> *b12b14b15y4y5 | 1974.93 | 82.127  | 13648  | 2 | 987.97  | 12.24  |
| P11021 GRP78_HUMAN 78 kDa glucose-regulated protein | 5  |                       | SQIFSTASDNQPTVTIK              | 447 | 17 | 4  | 25.35 | b3b5b9y14                                              | 1836.94 | 57.648  | 12840  | 2 | 918.97  | 4.25   |
| P11021 GRP78_HUMAN 78 kDa glucose-regulated protein | 6  |                       | SDIDEIVLVGGSTR                 | 353 | 14 | 3  | 18.69 | b6b12y7                                                | 1460.74 | 109.713 | 9547   | 2 | 730.87  | -13.62 |
| P11021 GRP78_HUMAN 78 kDa glucose-regulated protein | 7  |                       | EFFNGK                         | 376 | 6  | 1  | 13.37 | b4                                                     | 741.36  | 64.166  | 8779   | 1 | 741.36  | 9.96   |
| P11021 GRP78_HUMAN 78 kDa glucose-regulated protein | 8  | Carbamidomethyl+C(17) | EDVGTVVGIDLGTTYSCVGVFK         | 24  | 22 | 4  | 29.08 | b3b5b10b18                                             | 2316.09 | 76.755  | 2985   | 3 | 772.70  | -21.82 |
| P11021 GRP78_HUMAN 78 kDa glucose-regulated protein | 9  |                       | NQLTSPNENTVFDK                 | 81  | 15 | 4  | 28.59 | b3y3y5y13                                              | 1677.82 | 62.339  | 2857   | 4 | 420.21  | 8.44   |
| P11021 GRP78_HUMAN 78 kDa glucose-regulated protein | 10 |                       | ALSSQHQARIEIESFYEGEDFSETLTR    | 297 | 27 | 4  | 11.65 | b6 <sup>o</sup> *b6y6y10                               | 3143.52 | 107.269 | 38748  | 4 | 786.64  | 8.93   |
| P11021 GRP78_HUMAN 78 kDa glucose-regulated protein | 11 |                       | ELEEIVQPIHSKLYGSAGPPPTGEEDTAEK | 621 | 30 | 3  | 22.54 | y12y13y16                                              | 3197.57 | 79.613  | 25534  | 3 | 1066.53 | -12.75 |
| P11021 GRP78_HUMAN 78 kDa glucose-regulated protein | 12 |                       | ITPSYVAFTPEGERLIGDAAK          | 60  | 21 | 4  | 13.46 | b4b8 <sup>o</sup> *b8y13                               | 2235.14 | 68.844  | 19641  | 4 | 559.54  | -9.50  |

|                                                        |    |                                         |                              |     |    |    |       |                                              |         |         |         |   |         |        |
|--------------------------------------------------------|----|-----------------------------------------|------------------------------|-----|----|----|-------|----------------------------------------------|---------|---------|---------|---|---------|--------|
| [P11021 GRP78_HUMAN 78 kDa glucose-regulated protein   | 13 |                                         | AVEEKIEWLESHQDADIEDFK        | 596 | 21 | 6  | 25.77 | b4b10y3°y3y5y19                              | 2531.16 | 87.887  | 10649   | 3 | 844.39  | -11.57 |
| [P11021 GRP78_HUMAN 78 kDa glucose-regulated protein   | 14 |                                         | IEWLESHQDADIEDFKAK           | 601 | 18 | 14 | 70.05 | b9°b9°b9b10b11°b11b14°b14y7y12y13°y13*y13y14 | 2174.07 | 62.980  | 9844    | 4 | 544.27  | 14.37  |
| [P11021 GRP78_HUMAN 78 kDa glucose-regulated protein   | 15 |                                         | LTPEEIERMVNDAEK              | 532 | 15 | 4  | 36.99 | b8b9y11y12                                   | 1773.89 | 78.028  | 6309    | 3 | 591.97  | 12.80  |
| [P11021 GRP78_HUMAN 78 kDa glucose-regulated protein   | 16 |                                         | AKFEELNMDLFR                 | 324 | 12 | 6  | 31.84 | b4°b4b8°b8b10*b10                            | 1512.73 | 54.937  | 4388    | 2 | 756.87  | -11.06 |
| [P11021 GRP78_HUMAN 78 kDa glucose-regulated protein   | 17 |                                         | IEIESFYEGEDFSETLTRAK         | 306 | 20 | 3  | 13.93 | b3b12y13                                     | 2364.09 | 72.838  | 3200    | 2 | 1182.55 | -14.15 |
| [P11021 GRP78_HUMAN 78 kDa glucose-regulated protein   | 18 |                                         | NQIGDKEK                     | 573 | 8  | 5  | 35.35 | b4b7°b7°b7y4                                 | 931.48  | 42.248  | 1819    | 2 | 466.24  | -5.83  |
| [P11021 GRP78_HUMAN 78 kDa glucose-regulated protein   | 19 | Carbamidomethyl+C(18):Phosphoryl STY(6) | KEDVGTVVGIDLGTTYSCVGVFK      | 23  | 23 | 7  | 32.71 | b3b5b8°b8b11y8y18                            | 2524.19 | 82.174  | 2122    | 3 | 842.07  | -1.84  |
| [P11021 GRP78_HUMAN 78 kDa glucose-regulated protein   | 20 | Phosphoryl STY(10)                      | LYGSAGPPPTGEEDTAEKDEL        | 633 | 21 | 4  | 26.68 | b4b11y9y10                                   | 2255.97 | 42.270  | 1623    | 2 | 1128.49 | 9.52   |
| [P11021 GRP78_HUMAN 78 kDa glucose-regulated protein   | 21 |                                         | LYGSAGPPPTGEEDTAE            | 633 | 17 | 0  | 6.88  |                                              | 1690.76 | 88.670  | 5155    | 2 | 845.88  | 6.64   |
| [Q9BV86 ME11A_HUMAN Methyltransferase-like protein 11A | 1  | Carbamidomethyl+C(18)                   | DNMAQEGVILDDVDSSVCR          | 166 | 19 | 5  | 22.25 | b13b19y4y5y12°                               | 2122.92 | 63.011  | 14972   | 2 | 1061.96 | -8.63  |
| [Q9BV86 ME11A_HUMAN Methyltransferase-like protein 11A | 2  |                                         | TYLGEEGK                     | 101 | 8  | 4  | 48.29 | b3y4y5y6                                     | 896.44  | 29.436  | 7417    | 2 | 448.72  | 4.49   |
| [Q9BV86 ME11A_HUMAN Methyltransferase-like protein 11A | 3  |                                         | EVDMDVITDITDFLVQAK           | 85  | 16 | 6  | 36.5  | b8b9y9°y9*y9y10                              | 1851.94 | 98.538  | 22645   | 3 | 617.98  | 17.27  |
| [Q9BV86 ME11A_HUMAN Methyltransferase-like protein 11A | 4  |                                         | TSEVIEDEK                    | 1   | 9  | 4  | 29.76 | b6y5°y5y6                                    | 1049.51 | 59.527  | 12941   | 2 | 525.26  | 14.31  |
| [Q9BV86 ME11A_HUMAN Methyltransferase-like protein 11A | 5  |                                         | MTSEVIEDEK                   | 0   | 10 | 5  | 50.91 | y6°y6y7y8y9                                  | 1180.52 | 45.132  | 6541    | 3 | 394.18  | -20.47 |
| [Q9BV86 ME11A_HUMAN Methyltransferase-like protein 11A | 6  |                                         | TSEVIEDEKQFYSK               | 1   | 14 | 6  | 43.32 | b3b4b9y3y4°y4                                | 1702.81 | 43.560  | 176512  | 3 | 568.28  | -1.72  |
| [Q9BV86 ME11A_HUMAN Methyltransferase-like protein 11A | 7  |                                         | EVDMDVITDITDFLVQAKTYLGEEGK   | 85  | 24 | 6  | 26.69 | b7°b7b9y3y9y10                               | 2729.31 | 107.234 | 9260    | 4 | 683.08  | -3.13  |
| [Q9BV86 ME11A_HUMAN Methyltransferase-like protein 11A | 8  | Phosphoryl STY(13)                      | QIPPTVDGMLGGYGHISSIDINSSR    | 21  | 25 | 4  | 21.64 | b11b12°b12y15_HPO3y15                        | 2694.22 | 104.403 | 1780    | 3 | 898.75  | -9.61  |
| [Q9HBI1 PARVB_HUMAN Beta-parvin                        | 1  |                                         | VLLDWINVLEER                 | 91  | 14 | 9  | 49.27 | b3b8y1y2y3y8y10y11y14                        | 1712.92 | 104.436 | 31421   | 2 | 856.97  | 1.50   |
| [Q9HBI1 PARVB_HUMAN Beta-parvin                        | 2  |                                         | EGLLHSSHISEELTTTTEMMMGR      | 213 | 23 | 5  | 19.48 | b6b8b11y4y23                                 | 2590.16 | 90.832  | 10498   | 4 | 648.29  | -14.52 |
| [Q9HBI1 PARVB_HUMAN Beta-parvin                        | 3  |                                         | TMIDPTSKEDPK                 | 73  | 12 | 4  | 21.63 | b4°b4y6y8                                    | 1361.65 | 32.014  | 8477    | 3 | 454.56  | -6.37  |
| [Q9HBI1 PARVB_HUMAN Beta-parvin                        | 4  |                                         | EVSDLQEEGK                   | 36  | 10 | 3  | 26.21 | b3b5y7                                       | 1133.53 | 21.065  | 4312    | 2 | 567.27  | 2.05   |
| [Q9HBI1 PARVB_HUMAN Beta-parvin                        | 5  |                                         | QLEEDLYDGQVLQK               | 109 | 14 | 3  | 27.26 | b3b6b9                                       | 1677.81 | 64.061  | 20585   | 2 | 839.41  | -12.44 |
| [Q9HBI1 PARVB_HUMAN Beta-parvin                        | 6  |                                         | NAINSPMSPALVDVHPEDTQLEEN EER | 46  | 27 | 4  | 11.65 | b6b14°b14y11                                 | 3034.42 | 96.485  | 6617    | 4 | 759.36  | 6.03   |
| [Q9HBI1 PARVB_HUMAN Beta-parvin                        | 7  |                                         | DAFDTLFDHAPDK                | 239 | 13 | 3  | 20.02 | b8y3y12                                      | 1491.65 | 101.778 | 5454    | 3 | 497.89  | -18.09 |
| [Q9HBI1 PARVB_HUMAN Beta-parvin                        | 8  |                                         | VHNVSFAPFELMLDGGGLK          | 315 | 17 | 4  | 25.35 | b3b5b8y12                                    | 1877.00 | 114.841 | 3714    | 3 | 626.34  | 19.51  |
| [Q9HBI1 PARVB_HUMAN Beta-parvin                        | 9  |                                         | REGLLHSSHISEELTTTTEMMMGR     | 212 | 24 | 3  | 22.66 | y3y4y11                                      | 2746.33 | 96.680  | 4532    | 3 | 916.11  | 12.18  |
| [Q9HBI1 PARVB_HUMAN Beta-parvin                        | 10 | Phosphoryl STY(6)                       | LPEHVTVQVVVVRK               | 198 | 14 | 4  | 18.69 | b4°b4b9y9                                    | 1682.94 | 62.304  | 1712131 | 2 | 841.97  | 6.96   |
| [Q9HBI1 PARVB_HUMAN Beta-parvin                        | 11 | Oxidation+M(11)                         | VHNVSFAPFELMLDGGGLK          | 315 | 17 | 5  | 23.2  | b5°b5b9°b9b13                                | 1892.93 | 71.226  | 21436   | 3 | 631.65  | -12.45 |

|                                                             |    |                       |                                  |     |    |    |       |                                                       |         |         |       |   |         |        |
|-------------------------------------------------------------|----|-----------------------|----------------------------------|-----|----|----|-------|-------------------------------------------------------|---------|---------|-------|---|---------|--------|
| Q9HB1 PARVB_HUMAN Beta-parvin                               | 12 | Oxidation+M(7)        | NAINSPMPALVDVHPEDTQLEEN<br>EER   | 46  | 27 | 11 | 42.95 | b5b6*b6b7b9*b9b11*b1<br>1*b11y7y16                    | 3050.39 | 103.168 | 10987 | 3 | 1017.47 | -4.80  |
| Q9HB1 PARVB_HUMAN Beta-parvin                               | 13 | Oxidation+M()         | EGLLHSSHISEELTTTTEMMGR           | 213 | 23 | 6  | 23.64 | b3b7b18y5y12*y12                                      | 2606.16 | 124.752 | 5434  | 2 | 1303.59 | -9.65  |
| P50552 VASP_HUMAN Vasodilator-<br>stimulated phosphoprotein | 1  |                       | VQIYHNPTANSFR                    | 35  | 13 | 7  | 57.36 | y1y5y6y7y8y11y13                                      | 1546.76 | 45.105  | 45923 | 3 | 516.26  | -8.76  |
| P50552 VASP_HUMAN Vasodilator-<br>stimulated phosphoprotein | 2  |                       | QQPGPSEHIER                      | 143 | 11 | 4  | 49.58 | y4y5y8y9                                              | 1277.61 | 23.642  | 20026 | 3 | 426.54  | -7.74  |
| P50552 VASP_HUMAN Vasodilator-<br>stimulated phosphoprotein | 3  |                       | SGGGGLMEEMNAMLARR                | 257 | 17 | 5  | 33.99 | b4*b4b5*b5b6                                          | 1779.84 | 73.762  | 8809  | 4 | 445.71  | 3.36   |
| P50552 VASP_HUMAN Vasodilator-<br>stimulated phosphoprotein | 4  |                       | YNQATPNFHQWR                     | 71  | 12 | 3  | 21.63 | b8y4y8                                                | 1561.75 | 54.342  | 6467  | 2 | 781.38  | 13.21  |
| P50552 VASP_HUMAN Vasodilator-<br>stimulated phosphoprotein | 5  |                       | SGGGGLMEEMNAMLAR                 | 257 | 16 | 9  | 58.59 | b7b15y6y7y9*y9y14*y1<br>4y15                          | 1623.74 | 87.839  | 13965 | 2 | 812.37  | 7.67   |
| P50552 VASP_HUMAN Vasodilator-<br>stimulated phosphoprotein | 6  |                       | WLPAGTGPQAFSR                    | 22  | 13 | 4  | 20.02 | b9y6*y6y12                                            | 1387.70 | 36.831  | 13484 | 2 | 694.35  | -6.95  |
| P50552 VASP_HUMAN Vasodilator-<br>stimulated phosphoprotein | 7  |                       | VPAQSESVR                        | 298 | 9  | 6  | 44.46 | b8*b8y5y6*y6y7                                        | 972.49  | 41.058  | 7221  | 1 | 972.49  | -21.15 |
| P50552 VASP_HUMAN Vasodilator-<br>stimulated phosphoprotein | 8  | Carbamidomethyl+C(13) | SSSSVTTSETQPCTPSSSDYDLQR         | 321 | 25 | 14 | 59.23 | b4b6*b6b12*b12*b12y4<br>y8y9*y9y10*y10y11*y1<br>1     | 2707.15 | 44.557  | 3354  | 3 | 903.06  | -3.61  |
| P50552 VASP_HUMAN Vasodilator-<br>stimulated phosphoprotein | 9  | Carbamidomethyl+C(7)  | MSETVICSSR                       | 0   | 10 | 5  | 26.21 | b5*b5b9*b9y9                                          | 1169.52 | 43.523  | 1675  | 2 | 585.26  | -7.41  |
| P50552 VASP_HUMAN Vasodilator-<br>stimulated phosphoprotein | 10 |                       | YNQATPNFHQWRDAR                  | 71  | 15 | 4  | 24.95 | b3b8y9y12                                             | 1903.91 | 70.525  | 31339 | 3 | 635.31  | 9.55   |
| P50552 VASP_HUMAN Vasodilator-<br>stimulated phosphoprotein | 11 | Carbamidomethyl+C(7)  | MSETVICSSRATVMLYDDGK             | 0   | 21 | 8  | 39.53 | b10y4y7*y7y9y10*y10y<br>13                            | 2377.05 | 101.914 | 24661 | 4 | 595.02  | -13.97 |
| P50552 VASP_HUMAN Vasodilator-<br>stimulated phosphoprotein | 12 |                       | ATVMLYDDGNKR                     | 10  | 12 | 8  | 53.25 | b11y5*y5*y5y6y7y8*y8                                  | 1382.68 | 40.080  | 23638 | 2 | 691.84  | 6.09   |
| P50552 VASP_HUMAN Vasodilator-<br>stimulated phosphoprotein | 13 |                       | AESGRSGGGGLMEEMNAMLAR            | 252 | 21 | 5  | 30.22 | b3b6b11b12y9                                          | 2123.97 | 58.278  | 2055  | 2 | 1062.49 | 5.40   |
| P50552 VASP_HUMAN Vasodilator-<br>stimulated phosphoprotein | 14 | Oxidation+M(7)        | SGGGGLMEEMNAMLARR                | 257 | 17 | 4  | 15.8  | b15y10y16*y16                                         | 1795.82 | 91.806  | 1932  | 2 | 898.41  | -2.92  |
| P50552 VASP_HUMAN Vasodilator-<br>stimulated phosphoprotein | 15 |                       | PGPSEHIER                        | 145 | 9  | 0  | 2.58  |                                                       | 1021.50 | 23.645  | 3916  | 2 | 511.25  | -3.70  |
| P50552 VASP_HUMAN Vasodilator-<br>stimulated phosphoprotein | 16 |                       | QQPGPSEHIER                      | 143 | 11 | 1  | 7.74  | y6                                                    | 1259.60 | 23.639  | 4971  | 3 | 420.54  | -3.39  |
| P50552 VASP_HUMAN Vasodilator-<br>stimulated phosphoprotein | 17 |                       | VQIYHNPTANSFR                    | 35  | 13 | 1  | 7.35  | y9                                                    | 1529.74 | 45.117  | 2034  | 3 | 510.59  | -1.12  |
| P09972 ALDOC_HUMAN Fructose-<br>biphosphate aldolase C      | 1  | Carbamidomethyl+C(5)  | YASICQQNGIVPIVEPEILPDGDHD<br>LKR | 173 | 28 | 16 | 88.24 | b9b10b11*b11*b11y2y3<br>y5y7y9y10y13*y13y14y<br>17y28 | 3176.59 | 75.610  | 97255 | 4 | 794.90  | -3.15  |

|                                                      |    |                      |                          |      |    |    |       |                                        |         |         |        |   |         |        |
|------------------------------------------------------|----|----------------------|--------------------------|------|----|----|-------|----------------------------------------|---------|---------|--------|---|---------|--------|
| [P09972]ALDOC_HUMAN Fructose-bisphosphate aldolase C | 2  |                      | GILAADESVGSMKR           | 28   | 15 | 6  | 17.57 | b2b11*b11b13*b13y10                    | 1504.79 | 65.251  | 22430  | 3 | 502.27  | 6.73   |
| [P09972]ALDOC_HUMAN Fructose-bisphosphate aldolase C | 3  |                      | DNAGAATEEFIK             | 318  | 12 | 4  | 25.61 | b10b11*b11y11                          | 1265.59 | 43.531  | 3493   | 2 | 633.30  | -10.90 |
| [P09972]ALDOC_HUMAN Fructose-bisphosphate aldolase C | 4  |                      | IVAPGK                   | 22   | 6  | 1  | 13.37 | b5                                     | 584.38  | 42.193  | 18307  | 1 | 584.38  | 9.50   |
| [P09972]ALDOC_HUMAN Fructose-bisphosphate aldolase C | 5  |                      | MPHSYPALSAEQK            | 0    | 13 | 10 | 70.02 | b4b6b8*b8b9b10*b10y6y11*y11            | 1458.69 | 108.696 | 4441   | 2 | 729.85  | -12.89 |
| [P09972]ALDOC_HUMAN Fructose-bisphosphate aldolase C | 6  |                      | GVVPLAGTDGETTTQGLDGLSER  | 111  | 23 | 7  | 32.71 | b4b11y3y6y9y12*y12                     | 2273.09 | 121.944 | 2371   | 3 | 758.37  | -16.43 |
| [P09972]ALDOC_HUMAN Fructose-bisphosphate aldolase C | 7  | Carbamidomethyl+C(1) | CIGGVVIFHETLYQK          | 72   | 15 | 4  | 23.59 | b3b4y9*y9                              | 1811.88 | 95.520  | 2208   | 3 | 604.63  | -17.52 |
| [P09972]ALDOC_HUMAN Fructose-bisphosphate aldolase C | 8  |                      | PHSYPALSAEQK             | 1    | 12 | 3  | 25.61 | b10b11y3                               | 1327.67 | 86.448  | 1736   | 2 | 664.34  | 4.97   |
| [P09972]ALDOC_HUMAN Fructose-bisphosphate aldolase C | 9  |                      | DNAGAATEEFIKR            | 318  | 13 | 3  | 24.79 | b11y7y8                                | 1421.68 | 136.402 | 2338   | 1 | 1421.68 | -12.71 |
| [P09972]ALDOC_HUMAN Fructose-bisphosphate aldolase C | 10 |                      | GQRDNAGAATEEFIK          | 315  | 15 | 3  | 23.59 | b9y13y14                               | 1606.78 | 80.699  | 1603   | 2 | 803.89  | -1.44  |
| [P09972]ALDOC_HUMAN Fructose-bisphosphate aldolase C | 11 |                      | PIVEPEILPDGDHDLKR        | 184  | 17 | 2  | 22.36 | b3b4                                   | 1943.03 | 75.604  | 5436   | 2 | 972.02  | 5.91   |
| [P09972]ALDOC_HUMAN Fructose-bisphosphate aldolase C | 12 |                      | PEILPDGDHDLKR            | 188  | 13 | 2  | 12.15 | b4b9                                   | 1504.78 | 75.565  | 1629   | 3 | 502.26  | 0.65   |
| [P35580]MYH10_HUMAN Myosin-10                        | 1  |                      | LDPHLVLDQLR              | 689  | 11 | 8  | 80.24 | y3y4*y4y5y6y7y9y11                     | 1318.75 | 70.756  | 123603 | 2 | 659.88  | -1.57  |
| [P35580]MYH10_HUMAN Myosin-10                        | 2  | Carbamidomethyl+C(9) | VEDMAELTCLNEASVLHNLK     | 86   | 20 | 14 | 67.23 | b2b3b20y2y4*y4y5y11y13*y13y15y16y18y20 | 2286.10 | 79.248  | 111332 | 3 | 762.71  | -2.78  |
| [P35580]MYH10_HUMAN Myosin-10                        | 3  |                      | TQLEELEDELQATEDAK        | 1545 | 17 | 7  | 52.39 | y2y4y5y6y13y14y17                      | 1961.93 | 78.396  | 85898  | 2 | 981.47  | 4.79   |
| [P35580]MYH10_HUMAN Myosin-10                        | 4  | Carbamidomethyl+C(4) | ADFCIIHYAGK              | 572  | 11 | 9  | 92.32 | b3b7b8y3y4y5y7y8y11                    | 1294.62 | 58.484  | 76860  | 2 | 647.81  | -2.73  |
| [P35580]MYH10_HUMAN Myosin-10                        | 5  |                      | AGVLAHLEEER              | 771  | 11 | 5  | 40.55 | b3y4y5y6y11                            | 1223.63 | 49.421  | 44555  | 2 | 612.32  | -5.59  |
| [P35580]MYH10_HUMAN Myosin-10                        | 6  | Carbamidomethyl+C(1) | CNGVLEGIR                | 700  | 9  | 6  | 53.49 | b2*b2y3y4y5y7                          | 1017.51 | 48.410  | 37209  | 2 | 509.26  | -3.60  |
| [P35580]MYH10_HUMAN Myosin-10                        | 7  |                      | ADEWLMK                  | 587  | 7  | 4  | 39.69 | y3y4y5y7                               | 892.42  | 55.442  | 21939  | 2 | 446.72  | 0.21   |
| [P35580]MYH10_HUMAN Myosin-10                        | 8  |                      | QVRELEAELEDER            | 1596 | 13 | 6  | 44.35 | b10*b10y3y9y10y12                      | 1615.78 | 61.360  | 16521  | 3 | 539.26  | -7.40  |
| [P35580]MYH10_HUMAN Myosin-10                        | 9  |                      | TTLQVDTLNAELAAER         | 1761 | 16 | 3  | 16.61 | b7y7y13                                | 1744.92 | 101.364 | 12990  | 2 | 872.96  | 4.48   |
| [P35580]MYH10_HUMAN Myosin-10                        | 10 | Carbamidomethyl+C(2) | LCHLLGMNVMEFTR           | 380  | 14 | 8  | 37.88 | b7b8*b8b12b14y3y5*y5                   | 1720.82 | 70.512  | 11187  | 3 | 574.28  | -5.18  |
| [P35580]MYH10_HUMAN Myosin-10                        | 11 |                      | NHEAQIQDMR               | 1188 | 10 | 7  | 39.15 | b5b7*b7*b7b8*b8y9                      | 1241.57 | 30.920  | 9384   | 3 | 414.53  | -0.79  |
| [P35580]MYH10_HUMAN Myosin-10                        | 12 |                      | SLEAEILQLQEELASSER       | 1683 | 18 | 6  | 15.09 | b1b12*b12y7*y7y11                      | 2045.02 | 79.815  | 6039   | 3 | 682.35  | -9.01  |
| [P35580]MYH10_HUMAN Myosin-10                        | 13 |                      | FAKDAASLESQLQDTQELLQEETR | 1305 | 24 | 7  | 18.83 | b1b2b10*b10b14b16y3                    | 2750.36 | 90.691  | 2502   | 3 | 917.46  | 5.86   |
| [P35580]MYH10_HUMAN Myosin-10                        | 14 |                      | IAQLEEEEEEQSNMELLNDR     | 1737 | 21 | 8  | 25.77 | b7*b7b11*b11y4y8*y8y10                 | 2532.19 | 123.406 | 2469   | 3 | 844.73  | 3.18   |
| [P35580]MYH10_HUMAN Myosin-10                        | 15 |                      | LQAQMKDYQRELEEAR         | 1649 | 16 | 6  | 40.2  | b4*b4b5y4y6y12                         | 2007.98 | 101.236 | 2057   | 2 | 1004.50 | -3.47  |
| [P35580]MYH10_HUMAN Myosin-10                        | 16 |                      | QLHLEGASLELSDDDTESK      | 1944 | 19 | 3  | 14.47 | b10y11y14                              | 2086.98 | 65.235  | 1692   | 3 | 696.33  | -1.17  |
| [P35580]MYH10_HUMAN Myosin-10                        | 17 |                      | EVSTLK                   | 1919 | 6  | 4  | 26.31 | b3*b3y3*y3                             | 676.38  | 37.908  | 112617 | 1 | 676.38  | -5.14  |
| [P35580]MYH10_HUMAN Myosin-10                        | 18 |                      | NSLQEQQEEEEEAR           | 1345 | 14 | 4  | 18.69 | b4b13*b13y12                           | 1718.72 | 61.667  | 89374  | 2 | 859.86  | -17.68 |

|                              |    |                       |                                       |      |    |   |       |                             |         |         |        |   |         |        |
|------------------------------|----|-----------------------|---------------------------------------|------|----|---|-------|-----------------------------|---------|---------|--------|---|---------|--------|
| P35580 MYH10_HUMAN Myosin-10 | 19 |                       | ESLTK                                 | 658  | 5  | 4 | 38.83 | b3b4*b4y3                   | 577.32  | 70.297  | 30397  | 1 | 577.32  | -1.48  |
| P35580 MYH10_HUMAN Myosin-10 | 20 |                       | DELADEITNSASGK                        | 1710 | 14 | 5 | 32.14 | b6b12y9y10*y10              | 1449.70 | 52.201  | 12845  | 2 | 725.35  | 17.85  |
| P35580 MYH10_HUMAN Myosin-10 | 21 |                       | DLEAQIEAANK                           | 1627 | 11 | 3 | 23.63 | b7b10y6                     | 1201.62 | 29.970  | 11694  | 3 | 401.21  | 13.41  |
| P35580 MYH10_HUMAN Myosin-10 | 22 |                       | SDLLLEGFNNYR                          | 296  | 12 | 6 | 45.96 | b4b8b10y4y11*y11            | 1440.70 | 98.373  | 9671   | 2 | 720.85  | -8.22  |
| P35580 MYH10_HUMAN Myosin-10 | 23 |                       | ALAYDK                                | 1411 | 6  | 3 | 26.31 | b3y4*y4                     | 680.36  | 54.919  | 9176   | 1 | 680.36  | 1.61   |
| P35580 MYH10_HUMAN Myosin-10 | 24 |                       | DAASLESQLQDTQELLQEETR                 | 1308 | 21 | 9 | 33.32 | b3b14*b14b16*b16y4y9y11*y11 | 2404.20 | 104.566 | 8354   | 2 | 1202.60 | 21.83  |
| P35580 MYH10_HUMAN Myosin-10 | 25 |                       | TELEDTLDTTAAQQLR                      | 1152 | 17 | 3 | 24.45 | b8b12b13                    | 1933.93 | 70.556  | 7216   | 2 | 967.47  | -0.44  |
| P35580 MYH10_HUMAN Myosin-10 | 26 |                       | LLIK                                  | 1592 | 4  | 1 | 12.51 | y3                          | 486.37  | 53.939  | 6098   | 1 | 486.37  | 10.73  |
| P35580 MYH10_HUMAN Myosin-10 | 27 | Carbamidomethyl+C(26) | QGASFIGILDIAGFEFELNSFEQLCIN<br>NYTNEK | 449  | 33 | 5 | 17.16 | b10b29y3y10y28              | 3780.88 | 106.011 | 4979   | 3 | 1260.97 | 9.94   |
| P35580 MYH10_HUMAN Myosin-10 | 28 |                       | NMDPLNDNVATLLHQSSDR                   | 594  | 19 | 7 | 42.97 | b5b10*b10b11b13b16y3        | 2140.00 | 107.929 | 4247   | 2 | 1070.50 | -5.70  |
| P35580 MYH10_HUMAN Myosin-10 | 29 |                       | QGLETDNK                              | 1226 | 8  | 4 | 47.9  | y3*y3y5y7                   | 904.43  | 88.993  | 3889   | 1 | 904.43  | -12.15 |
| P35580 MYH10_HUMAN Myosin-10 | 30 |                       | NLPIYSENIEMYR                         | 129  | 14 | 8 | 37.88 | b8*b8b12*b12b13*b13y6y9     | 1754.90 | 89.986  | 3096   | 2 | 877.96  | 14.40  |
| P35580 MYH10_HUMAN Myosin-10 | 31 |                       | ELEAELEDER                            | 1599 | 10 | 5 | 40.12 | b8b9y6*y6y9                 | 1232.55 | 30.934  | 3003   | 3 | 411.52  | -8.02  |
| P35580 MYH10_HUMAN Myosin-10 | 32 |                       | ALEQQVEEMR                            | 1535 | 10 | 3 | 40.98 | b4b6b9                      | 1232.62 | 36.206  | 2641   | 3 | 411.54  | 21.19  |
| P35580 MYH10_HUMAN Myosin-10 | 33 |                       | IVGLDQVTGMTETAFGSAYK                  | 624  | 20 | 9 | 37.61 | b3b15*b15*b15b16y3y6y11*y11 | 2088.02 | 92.751  | 2555   | 3 | 696.68  | -4.56  |
| P35580 MYH10_HUMAN Myosin-10 | 34 |                       | LNLSSR                                | 1331 | 6  | 2 | 26.31 | b5y5                        | 689.39  | 26.009  | 2425   | 1 | 689.39  | -9.65  |
| P35580 MYH10_HUMAN Myosin-10 | 35 |                       | HATALEELSEQLEQAK                      | 1200 | 16 | 4 | 29.97 | b4b12y10y11                 | 1796.89 | 61.443  | 2117   | 3 | 599.63  | -8.90  |
| P35580 MYH10_HUMAN Myosin-10 | 36 |                       | IGQLEEQLQEQAK                         | 1822 | 13 | 3 | 20.02 | b3b9y6                      | 1514.74 | 40.130  | 1981   | 3 | 505.59  | -18.37 |
| P35580 MYH10_HUMAN Myosin-10 | 37 |                       | LQQLDDTLVDLDHQR                       | 1424 | 16 | 9 | 43.6  | b3*b3b4*b4b7b12*b12y4y6     | 1937.99 | 101.798 | 1920   | 2 | 969.50  | 15.31  |
| P35580 MYH10_HUMAN Myosin-10 | 38 |                       | MQAHIQDLEEQLDEEGAR                    | 947  | 19 | 7 | 37.81 | b3b4b7b11y3y10*y10          | 2240.99 | 42.236  | 1876   | 2 | 1121.00 | -6.65  |
| P35580 MYH10_HUMAN Myosin-10 | 39 |                       | HADQYK                                | 1863 | 6  | 1 | 13.37 | y3                          | 761.35  | 26.904  | 1821   | 1 | 761.35  | -9.94  |
| P35580 MYH10_HUMAN Myosin-10 | 40 | Carbamidomethyl+C(9)  | VEDMAELTCLNEASVLHNLKDR                | 86   | 22 | 5 | 22.92 | b7*b7b8b14*b14              | 2557.25 | 121.171 | 591032 | 3 | 853.09  | 3.82   |
| P35580 MYH10_HUMAN Myosin-10 | 41 |                       | DVDRIVGLDQVTGMTETAFGSAY<br>K          | 620  | 24 | 9 | 63.38 | b4*b4y5y6y7*y7y8y9y12       | 2573.23 | 121.161 | 213413 | 3 | 858.41  | -10.15 |
| P35580 MYH10_HUMAN Myosin-10 | 42 |                       | QTKVEGELEEMER                         | 867  | 13 | 3 | 20.02 | b12y8y11                    | 1577.74 | 63.024  | 48354  | 3 | 526.58  | -5.11  |
| P35580 MYH10_HUMAN Myosin-10 | 43 |                       | ALEEETKNHEAQIQDMR                     | 1181 | 17 | 6 | 38.08 | b5b9b11b13y11*y11           | 2041.95 | 53.904  | 39114  | 2 | 1021.48 | -3.05  |
| P35580 MYH10_HUMAN Myosin-10 | 44 |                       | NHEAQIQDMRQR                          | 1188 | 12 | 7 | 36.33 | b3b8*b8*b8b10*b10y5         | 1525.72 | 40.185  | 25656  | 3 | 509.25  | -4.80  |
| P35580 MYH10_HUMAN Myosin-10 | 45 |                       | MAQRTGLEDPER                          | 0    | 12 | 3 | 21.63 | b7y6y10                     | 1402.68 | 88.200  | 17045  | 2 | 701.84  | 0.61   |
| P35580 MYH10_HUMAN Myosin-10 | 46 |                       | KALEEETK                              | 1180 | 8  | 4 | 48.29 | b3y3y4y6                    | 947.50  | 29.451  | 15897  | 2 | 474.25  | -9.40  |
| P35580 MYH10_HUMAN Myosin-10 | 47 |                       | LQRELDDEATEANEGLSR                    | 1902 | 17 | 7 | 42.48 | b7b10b11*b11y8y12y14        | 1916.94 | 78.978  | 11534  | 3 | 639.65  | 5.73   |

|                              |    |                                                |                                    |      |    |    |       |                                        |         |         |       |   |         |        |
|------------------------------|----|------------------------------------------------|------------------------------------|------|----|----|-------|----------------------------------------|---------|---------|-------|---|---------|--------|
| P35580 MYH10_HUMAN Myosin-10 | 48 |                                                | NSLQEQEEEEEAR                      | 1345 | 15 | 5  | 17.57 | b4b6°b6*b6y7                           | 1846.87 | 87.903  | 9429  | 2 | 923.94  | 14.48  |
| P35580 MYH10_HUMAN Myosin-10 | 49 |                                                | QLRADMEDLMSSK                      | 1507 | 13 | 4  | 20.02 | b9°b9y5y7                              | 1523.72 | 87.767  | 8324  | 2 | 762.37  | 2.96   |
| P35580 MYH10_HUMAN Myosin-10 | 50 |                                                | ELEEARASR                          | 1659 | 9  | 5  | 44.46 | b4b5°b5b8y7                            | 1060.53 | 98.522  | 8124  | 1 | 1060.53 | -9.90  |
| P35580 MYH10_HUMAN Myosin-10 | 51 |                                                | ALEEALKEEFER                       | 1490 | 14 | 3  | 18.69 | b6y6y8                                 | 1663.82 | 48.865  | 7932  | 2 | 832.41  | -0.59  |
| P35580 MYH10_HUMAN Myosin-10 | 52 |                                                | QELEEILHDLESRVEEEEER               | 917  | 20 | 3  | 13.93 | b11y9y11                               | 2511.16 | 73.352  | 7486  | 3 | 837.73  | -8.56  |
| P35580 MYH10_HUMAN Myosin-10 | 53 |                                                | DELADEITNSASGKSALLDEK              | 1710 | 21 | 4  | 21    | b5b7b15y12                             | 2206.10 | 107.732 | 7311  | 2 | 1103.55 | 12.17  |
| P35580 MYH10_HUMAN Myosin-10 | 54 |                                                | LEVNMQAMKAQFER                     | 1564 | 14 | 4  | 18.69 | b5b12y8*y8                             | 1694.86 | 54.978  | 6754  | 3 | 565.62  | 13.68  |
| P35580 MYH10_HUMAN Myosin-10 | 55 |                                                | MEIDLKDLAQIEAANK                   | 1621 | 17 | 3  | 15.8  | b5y9y12                                | 1930.97 | 74.430  | 6056  | 2 | 965.99  | -3.16  |
| P35580 MYH10_HUMAN Myosin-10 | 56 |                                                | VVRELQAQIAELQEDFESEK               | 1111 | 20 | 7  | 24.53 | b3y9*y9y10°y10y13°y13                  | 2361.17 | 81.500  | 5977  | 2 | 1181.09 | -10.75 |
| P35580 MYH10_HUMAN Myosin-10 | 57 |                                                | ALEQQVEEMRTQLEEELEDELQAT<br>EDAK   | 1535 | 27 | 10 | 26.12 | b6°b6*b6b8°b8*b8b9b14y4°y4             | 3175.46 | 92.760  | 5558  | 3 | 1059.16 | -11.38 |
| P35580 MYH10_HUMAN Myosin-10 | 58 |                                                | SDLLEGFNNYRFLSNGYIPIPGQ<br>DK      | 296  | 27 | 7  | 35.41 | b3y4y5y6°y6y12*y12                     | 3098.52 | 90.756  | 4306  | 3 | 1033.51 | -11.03 |
| P35580 MYH10_HUMAN Myosin-10 | 59 |                                                | DEIFAQSKSEK                        | 1668 | 12 | 8  | 80.6  | b3b5b7b9y5y6y8*y8                      | 1410.66 | 136.428 | 4083  | 1 | 1410.66 | -8.31  |
| P35580 MYH10_HUMAN Myosin-10 | 60 |                                                | QLHLEGASLELSDDDTESKTS<br>NETQPPQSE | 1944 | 32 | 4  | 15.46 | b8y6y10y16                             | 3499.61 | 89.932  | 3350  | 3 | 1167.21 | 8.86   |
| P35580 MYH10_HUMAN Myosin-10 | 61 |                                                | RDLSEELEALK                        | 1141 | 11 | 5  | 49.58 | b3°b3b4b6b7                            | 1302.71 | 89.098  | 3291  | 1 | 1302.71 | 13.59  |
| P35580 MYH10_HUMAN Myosin-10 | 62 |                                                | EEELQGALARGDDETLHK                 | 1088 | 18 | 5  | 28.38 | b12b15y7°y7y8                          | 2011.00 | 92.799  | 2479  | 2 | 1006.00 | 13.42  |
| P35580 MYH10_HUMAN Myosin-10 | 63 |                                                | ERNTDQASMPENTVAQK                  | 363  | 17 | 3  | 15.8  | b7b13y8                                | 1918.87 | 83.566  | 2345  | 2 | 959.94  | -11.51 |
| P35580 MYH10_HUMAN Myosin-10 | 64 |                                                | ADMEDLMSSKDDVVGK                   | 1510 | 15 | 3  | 17.57 | b7y3y7                                 | 1640.70 | 45.373  | 2294  | 4 | 410.93  | -7.89  |
| P35580 MYH10_HUMAN Myosin-10 | 65 |                                                | LQNELDNVSTLLEAEKK                  | 1284 | 18 | 3  | 15.09 | b4b10y12                               | 2073.05 | 48.745  | 1842  | 3 | 691.69  | -11.89 |
| P35580 MYH10_HUMAN Myosin-10 | 66 |                                                | AQRTGLEDPER                        | 1    | 11 | 4  | 26.64 | b9b10°b10y8                            | 1271.63 | 34.490  | 1817  | 3 | 424.55  | -5.47  |
| P35580 MYH10_HUMAN Myosin-10 | 67 | Carbamidomethyl+C(1);<br>Carbamidomethyl+C(13) | CMLQDREDQSILCTGESGAGK              | 163  | 21 | 3  | 20.1  | y8y12y14                               | 2355.06 | 88.590  | 1681  | 3 | 785.69  | 8.40   |
| P35580 MYH10_HUMAN Myosin-10 | 68 | Phosphoryl STY(13)                             | IAQLEEELEEQSNMELLNDR               | 1737 | 21 | 8  | 18.23 | b7*b7b12°b12*b12y9_9<br>HPO3 y9y20°y20 | 2612.17 | 43.621  | 30625 | 3 | 871.39  | 13.37  |
| P35580 MYH10_HUMAN Myosin-10 | 69 | Phosphoryl STY(7)                              | HGFEAASIKEER                       | 42   | 12 | 4  | 21.63 | b5°b5y3y7                              | 1453.64 | 54.843  | 14690 | 2 | 727.33  | 4.03   |
| P35580 MYH10_HUMAN Myosin-10 | 70 | Carbamidomethyl+C(2);<br>Phosphoryl STY(13)    | LCHLLGMNVMEFTR                     | 380  | 14 | 3  | 18.69 | b9b11y3                                | 1800.77 | 64.214  | 8432  | 2 | 900.89  | -13.42 |
| P35580 MYH10_HUMAN Myosin-10 | 71 | Phosphoryl STY(4)                              | QVASNLEKK                          | 1440 | 9  | 3  | 29.76 | b3b8y6                                 | 1096.53 | 43.571  | 8398  | 1 | 1096.53 | -0.89  |
| P35580 MYH10_HUMAN Myosin-10 | 72 | Phosphoryl STY(9)                              | HATALEELSEQLEQAK                   | 1200 | 16 | 3  | 24.99 | b6b8b9_H3PO4 b9                        | 1876.85 | 66.127  | 3619  | 3 | 626.29  | -7.35  |
| P35580 MYH10_HUMAN Myosin-10 | 73 | Phosphoryl STY(12)                             | QVLALQSQLADTKK                     | 1364 | 14 | 4  | 24.13 | b11b12°b12y11                          | 1622.85 | 93.447  | 2541  | 2 | 811.93  | 5.94   |
| P35580 MYH10_HUMAN Myosin-10 | 74 | Oxidation+M(5)                                 | LQAQMKDYQRELEAR                    | 1649 | 16 | 7  | 57.64 | b3b9b11y4y7y10y15                      | 2024.01 | 77.244  | 42121 | 3 | 675.34  | 10.80  |
| P35580 MYH10_HUMAN Myosin-10 | 75 | Oxidation+M(9)                                 | HADQYKEQMEK                        | 1863 | 11 | 4  | 23.63 | b4°b4b9y4                              | 1422.63 | 105.491 | 33067 | 3 | 474.88  | -3.60  |

|                                                  |    |                                        |                                   |      |    |    |       |                                          |         |         |        |   |         |        |
|--------------------------------------------------|----|----------------------------------------|-----------------------------------|------|----|----|-------|------------------------------------------|---------|---------|--------|---|---------|--------|
| P35580 MYH10_HUMAN Myosin-10                     | 76 | Oxidation+M(3)                         | HEMPPHIYAISESAYR                  | 147  | 16 | 4  | 29.97 | b13b14y3y10                              | 1916.91 | 74.585  | 6409   | 3 | 639.64  | 6.30   |
| P35580 MYH10_HUMAN Myosin-10                     | 77 | Oxidation+M(4)                         | EIFMQVEDERR                       | 1852 | 11 | 4  | 23.63 | b8y6°y6y8                                | 1467.69 | 38.916  | 2438   | 2 | 734.35  | -1.00  |
| P35580 MYH10_HUMAN Myosin-10                     | 78 | Oxidation+M(7)                         | NTDQASMPENTVAQK                   | 365  | 15 | 3  | 17.57 | b12y4y11                                 | 1649.76 | 48.873  | 2111   | 2 | 825.38  | 7.10   |
| P35580 MYH10_HUMAN Myosin-10                     | 79 | Oxidation+M(1)                         | MQAHIQDLEEQDDEEGAR                | 947  | 19 | 3  | 14.47 | b8b10y16                                 | 2257.03 | 77.255  | 1991   | 2 | 1129.02 | 13.85  |
| P35580 MYH10_HUMAN Myosin-10                     | 80 |                                        | AGVLAHLEEER                       | 771  | 11 | 0  | 2.58  |                                          | 1205.62 | 49.374  | 1701   | 3 | 402.54  | -2.03  |
| P35580 MYH10_HUMAN Myosin-10                     | 81 | Carbamidomethyl+C(9)                   | VEDMAELTCLNEASVLHNLK              | 86   | 20 | 0  | 6.45  |                                          | 2269.07 | 79.238  | 1686   | 4 | 568.02  | -4.30  |
| P09417 DHPR_HUMAN Dihydropteridine reductase     | 1  |                                        | AALDGTGPMIGYGMMAK                 | 138  | 16 | 8  | 43.6  | b7°b7b8b10b12y6y9y16                     | 1552.76 | 61.239  | 39992  | 3 | 518.26  | 7.86   |
| P09417 DHPR_HUMAN Dihydropteridine reductase     | 2  |                                        | NSGMPPGAAAIAPVTLDTMPN R           | 167  | 24 | 4  | 22.66 | y5y7y8*y8                                | 2393.26 | 136.364 | 2116   | 3 | 798.42  | 11.43  |
| P09417 DHPR_HUMAN Dihydropteridine reductase     | 3  |                                        | MTDSFTEQADQVTAEVGK                | 55   | 18 | 7  | 48.45 | b9b11b15y8y9y13y17                       | 1956.85 | 85.902  | 12802  | 3 | 652.95  | -19.15 |
| P09417 DHPR_HUMAN Dihydropteridine reductase     | 4  | Carbamidomethyl+C(1)                   | CVQAFR                            | 25   | 6  | 1  | 13.37 | b3                                       | 780.37  | 32.320  | 7369   | 1 | 780.37  | -14.31 |
| P09417 DHPR_HUMAN Dihydropteridine reductase     | 5  |                                        | NWWVASVDVVENEEASASIVK             | 33   | 22 | 5  | 17.5  | b4b12*b12y10y12                          | 2445.19 | 67.613  | 2629   | 3 | 815.73  | -16.37 |
| P09417 DHPR_HUMAN Dihydropteridine reductase     | 6  |                                        | MAAAAAAGEAR                       | 0    | 11 | 5  | 49.51 | b4b5y7y9y10                              | 989.50  | 41.664  | 1848   | 2 | 495.25  | 12.58  |
| P09417 DHPR_HUMAN Dihydropteridine reductase     | 7  | Carbamidomethyl+C(23)                  | AALDGTGPMIGYGMMAKGAHVQL CQSLAGK   | 138  | 29 | 5  | 16.42 | b3y7*y7y10y18                            | 2902.47 | 109.715 | 43600  | 4 | 726.37  | 10.60  |
| P09417 DHPR_HUMAN Dihydropteridine reductase     | 8  |                                        | ARNWWVASVDVVENEEASASIV K          | 31   | 24 | 8  | 40.18 | b4*b4b5b6b12*b12y16y19                   | 2672.39 | 90.683  | 41167  | 3 | 891.47  | 7.03   |
| P09417 DHPR_HUMAN Dihydropteridine reductase     | 9  | Carbamidomethyl+C(6)                   | SLFKNCMLMWK                       | 98   | 11 | 3  | 23.63 | b9y3y9                                   | 1441.68 | 98.429  | 1796   | 3 | 481.23  | -12.87 |
| P09417 DHPR_HUMAN Dihydropteridine reductase     | 10 | Phosphoryl STY(20)                     | NSGMPPGAAAIAPVTLDTMPN RK          | 167  | 25 | 6  | 21.87 | b9b13y4y6y10*y10                         | 2601.32 | 87.964  | 94889  | 3 | 867.78  | 14.27  |
| P09417 DHPR_HUMAN Dihydropteridine reductase     | 11 | Oxidation+M(14)                        | AALDGTGPMIGYGMMAK                 | 138  | 16 | 5  | 16.61 | b8°b8y3y13°y13                           | 1568.75 | 49.825  | 7194   | 3 | 523.59  | 6.07   |
| P09417 DHPR_HUMAN Dihydropteridine reductase     | 12 | Oxidation+M(22)                        | NSGMPPGAAAIAPVTLDTMPN RK          | 167  | 25 | 3  | 22.58 | b10b12b13                                | 2537.29 | 79.746  | 5221   | 3 | 846.43  | -13.76 |
| P28065 PSB9_HUMAN Proteasome subunit beta type-9 | 1  | Carbamidomethyl+C(30)                  | QPFAIGGSGSTFIYGYVDAAYKPG MSPEECRR | 141  | 32 | 16 | 63.64 | b2b3b4b5b9°b9*b9b11b13b19y1y3y7y11y14y32 | 3511.66 | 73.080  | 556455 | 4 | 878.67  | 5.35   |
| P28065 PSB9_HUMAN Proteasome subunit beta type-9 | 2  |                                        | DGSSGGVIYLVTTAAGVDHR              | 185  | 21 | 5  | 13.46 | b9b21y1y5y19                             | 2088.09 | 78.957  | 28428  | 3 | 696.70  | 6.20   |
| P28065 PSB9_HUMAN Proteasome subunit beta type-9 | 3  |                                        | AGEVHTGTTIMAVEFDGGVVMG SDSR       | 13   | 26 | 8  | 35.88 | b6°b6b7b12b23y6y9y20                     | 2623.20 | 66.797  | 9154   | 3 | 875.07  | -3.54  |
| P28065 PSB9_HUMAN Proteasome subunit beta type-9 | 4  | Carbamidomethyl+C(30)                  | QPFAIGGSGSTFIYGYVDAAYKPG MSPEECR  | 141  | 31 | 4  | 13.41 | b4b10y11y14                              | 3355.51 | 91.768  | 6575   | 3 | 1119.17 | -9.60  |
| P28065 PSB9_HUMAN Proteasome subunit beta type-9 | 5  |                                        | EGGQVYGTGGMLTR                    | 126  | 15 | 7  | 28.59 | b8b9°b9b12*b12y10y15                     | 1538.76 | 47.862  | 5225   | 2 | 769.89  | 1.03   |
| P28065 PSB9_HUMAN Proteasome subunit beta type-9 | 6  |                                        | AGAPTGDLP                         | 3    | 10 | 5  | 54.31 | b3b4b5y5y8                               | 954.50  | 60.713  | 25634  | 2 | 477.75  | -0.77  |
| P28065 PSB9_HUMAN Proteasome subunit beta type-9 | 7  |                                        | VSAGEAVVNR                        | 39   | 10 | 5  | 54.31 | b5b7y6y7y8                               | 1001.52 | 28.656  | 3236   | 2 | 501.26  | -15.48 |
| P28065 PSB9_HUMAN Proteasome subunit beta type-9 | 8  |                                        | EDLSAHLMVAGWDQR                   | 111  | 15 | 3  | 25.65 | b3b4b8                                   | 1727.81 | 76.235  | 2755   | 2 | 864.41  | -2.47  |
| P28065 PSB9_HUMAN Proteasome subunit beta type-9 | 9  |                                        | MLRAGAPTGDLP                      | 0    | 13 | 6  | 52.13 | b4b8b10°b10b12y12                        | 1354.74 | 54.921  | 10691  | 2 | 677.87  | 10.72  |
| P28065 PSB9_HUMAN Proteasome subunit beta type-9 | 10 | Carbamidomethyl+C(30);Phosphoryl STY() | QPFAIGGSGSTFIYGYVDAAYKPG MSPEECRR | 141  | 32 | 7  | 21.29 | b12*b12b13°b13b17y15°y15                 | 3591.64 | 81.492  | 226888 | 4 | 898.66  | 10.81  |

|                                                    |    |                                                            |                                         |     |    |    |       |                                  |         |         |        |   |         |        |
|----------------------------------------------------|----|------------------------------------------------------------|-----------------------------------------|-----|----|----|-------|----------------------------------|---------|---------|--------|---|---------|--------|
| P28065 PSB9_HUMAN Proteasome subunit beta type-9   | 11 | Oxidation+M(11)                                            | AGEVHTGTTIMAVEFDGGVVMG<br>SDSR          | 13  | 26 | 10 | 42.93 | b10b14°b14b19y4y12y18y24y25°y25  | 2639.18 | 121.161 | 40255  | 3 | 880.40  | -9.81  |
| O94888 UBXN7_HUMAN UBX domain-containing protein 7 | 1  | Carbamidomethyl+C(14);Carbamidomethyl+C(16)                | WLMINIQNVQDFACQLNRDVS<br>NEAVK          | 166 | 28 | 10 | 43.46 | b3b5b13°b13y5y6y7*y7y13y28       | 3451.67 | 126.239 | 22614  | 4 | 863.67  | 11.03  |
| O94888 UBXN7_HUMAN UBX domain-containing protein 7 | 2  |                                                            | SIFDGFR                                 | 105 | 7  | 3  | 36.68 | b5y5y6                           | 841.42  | 42.186  | 4158   | 2 | 421.21  | -3.41  |
| O94888 UBXN7_HUMAN UBX domain-containing protein 7 | 3  |                                                            | ADGVVEGIDVNGPK                          | 398 | 14 | 5  | 29.87 | b3b6°b6b7y9                      | 1369.71 | 71.933  | 25267  | 2 | 685.36  | 8.29   |
| O94888 UBXN7_HUMAN UBX domain-containing protein 7 | 4  | Carbamidomethyl+C(14);Carbamidomethyl+C(16)                | WLMINIQNVQDFACQLNR                      | 166 | 19 | 5  | 25.13 | b8*b8y6y7y9                      | 2423.17 | 37.606  | 6037   | 3 | 808.39  | 10.18  |
| O94888 UBXN7_HUMAN UBX domain-containing protein 7 | 5  |                                                            | ASLQETHFDSTQTK                          | 295 | 14 | 12 | 41.26 | b4°b4*b4b5°b5*b5b8°b8*b8b12y5°y5 | 1592.76 | 54.910  | 4913   | 3 | 531.59  | 1.38   |
| O94888 UBXN7_HUMAN UBX domain-containing protein 7 | 6  |                                                            | AAHGSAASSALK                            | 1   | 13 | 3  | 20.02 | b12y6y10                         | 1127.60 | 36.032  | 2645   | 2 | 564.30  | 14.40  |
| O94888 UBXN7_HUMAN UBX domain-containing protein 7 | 7  |                                                            | MAAHGSAASSALK                           | 0   | 14 | 5  | 38.67 | b6b12y8y10y12                    | 1258.63 | 37.622  | 1802   | 2 | 629.82  | 5.33   |
| O94888 UBXN7_HUMAN UBX domain-containing protein 7 | 8  |                                                            | SESLIDASEDSQLEAAIRASLQETH<br>FDSTQTK    | 277 | 32 | 6  | 21.75 | b17y8°y8y10y12y16                | 3507.69 | 86.060  | 113519 | 4 | 877.68  | 6.40   |
| O94888 UBXN7_HUMAN UBX domain-containing protein 7 | 9  |                                                            | MAAHGSAASSALKGLIQFTTTT<br>GASESVGK      | 0   | 32 | 5  | 17.59 | b9b12b14y6y15                    | 3076.53 | 90.736  | 36364  | 4 | 769.89  | -14.44 |
| O94888 UBXN7_HUMAN UBX domain-containing protein 7 | 10 | Carbamidomethyl+C(16)                                      | LSHLDYDITLQEAGLCPQETVVFQ<br>ERN         | 462 | 27 | 3  | 11.65 | b12y7y12                         | 3175.49 | 76.809  | 3768   | 3 | 1059.17 | -13.53 |
| O94888 UBXN7_HUMAN UBX domain-containing protein 7 | 11 | Carbamidomethyl+C(20)                                      | SDEESESELSFGSEEFISVCGSDEEE<br>EVENLAKSR | 313 | 35 | 4  | 22.95 | y11°y11y13y14                    | 3939.73 | 81.530  | 2020   | 3 | 1313.91 | 13.63  |
| O94888 UBXN7_HUMAN UBX domain-containing protein 7 | 12 | Carbamidomethyl+C(16);Phosphoryl STY(20)                   | LSHLDYDITLQEAGLCPQETVVFQ<br>ER          | 462 | 26 | 4  | 15.23 | b6b8y5y7                         | 3141.49 | 93.586  | 6355   | 3 | 1047.84 | 13.13  |
| O94888 UBXN7_HUMAN UBX domain-containing protein 7 | 13 | Carbamidomethyl+C(9);Oxidation+M(12)                       | GSFETAKECGQMKNK                         | 151 | 15 | 9  | 79.18 | b3°b3b5b7b8y4y5y6y7              | 1730.74 | 25.589  | 32735  | 3 | 577.58  | -5.78  |
| O94888 UBXN7_HUMAN UBX domain-containing protein 7 | 14 | Carbamidomethyl+C(14);Carbamidomethyl+C(16);Oxidation+M(3) | WLMINIQNVQDFACQLNR                      | 166 | 19 | 9  | 46.25 | b3b8b11°b11*b11y4y8y10y11        | 2439.11 | 102.225 | 1627   | 3 | 813.71  | -11.81 |



Cystic fibrosis PLT LC-MS run 1: PLT\_CF\_290709\_01

| Protein name            | Peptide Rank | Peptide Modification                        | Peptide Sequence                | Peptide sequence start | Peptide sequence Length | Peptide Matched Products | Score  | By Matches                                                                                                                                                                                                                                                                                                                               | Precursor MH+ (Da) | Retention time (min) | Intensity | z | Precursor m/z | MH+ Error (ppm) |
|-------------------------|--------------|---------------------------------------------|---------------------------------|------------------------|-------------------------|--------------------------|--------|------------------------------------------------------------------------------------------------------------------------------------------------------------------------------------------------------------------------------------------------------------------------------------------------------------------------------------------|--------------------|----------------------|-----------|---|---------------|-----------------|
| P63261 ACTG_HUMAN Actin | 1            |                                             | AGFAGDDAPR                      | 18                     | 10                      | 19                       | 144.36 | b2b3b4b5b8 <sup>o</sup> b8y1y2y3y4 <sup>y</sup> 4y5y6 <sup>y</sup> 6y7 <sup>y</sup> 7y8y9y10                                                                                                                                                                                                                                             | 976.44             | 31.402               | 2485698   | 2 | 488.72        | -6.13           |
| P63261 ACTG_HUMAN Actin | 2            |                                             | EITALAPSTMK                     | 315                    | 11                      | 27                       | 174.2  | b1b2 <sup>o</sup> b2b3 <sup>o</sup> b3b5 <sup>o</sup> b5b6b8b9b10b11y1y2y3 <sup>y</sup> 3y4 <sup>y</sup> 4y5 <sup>y</sup> 5y6 <sup>y</sup> 6y7y8y9 <sup>y</sup> 9y11                                                                                                                                                                     | 1161.62            | 50.848               | 1793835   | 2 | 581.31        | -0.95           |
| P63261 ACTG_HUMAN Actin | 3            | Carbamidomethyl+C(1); Carbamidomethyl+C(16) | CPEALFQPSFLGMESCGIHETTFNSIMK    | 256                    | 28                      | 48                       | 323.33 | b2b3b4 <sup>o</sup> b4b5b6b7 <sup>o</sup> b7b8 <sup>o</sup> b8b10b11 <sup>o</sup> b11b12 <sup>o</sup> b12b13 <sup>o</sup> b13 <sup>o</sup> b13b14 <sup>o</sup> b14b28y1y2y3y4y5 <sup>y</sup> 5y6y8y9y10y12y14 <sup>y</sup> 14y15 <sup>y</sup> 15y17 <sup>y</sup> 17y18 <sup>y</sup> 18y20y21 <sup>y</sup> 21y22 <sup>y</sup> 22y23y24y28 | 3231.47            | 92.612               | 1596836   | 3 | 1077.83       | 1.59            |
| P63261 ACTG_HUMAN Actin | 4            |                                             | TTGIVMDSGDGVHTHTVPIYEGYALPHAILR | 147                    | 30                      | 37                       | 265.32 | b2 <sup>o</sup> b2b3 <sup>o</sup> b3b4 <sup>o</sup> b4b6 <sup>o</sup> b6b18 <sup>o</sup> b18b20b26 <sup>o</sup> b26b30y2y3y5y6y7y8y9y10y11 <sup>y</sup> 11y12y14y15y16y17y20y23y24y25 <sup>y</sup> 25y26y28y30                                                                                                                           | 3183.58            | 80.366               | 1231109   | 4 | 796.65        | -9.28           |
| P63261 ACTG_HUMAN Actin | 5            |                                             | AVFPSIVGRPR                     | 28                     | 11                      | 15                       | 136.98 | b2b3b4b9y1y2y3y4y5y6y7y8y9y10y11                                                                                                                                                                                                                                                                                                         | 1198.70            | 56.143               | 1059745   | 2 | 599.86        | -2.24           |
| P63261 ACTG_HUMAN Actin | 6            |                                             | DSYVGDEAQSQR                    | 50                     | 12                      | 38                       | 214.24 | b2 <sup>o</sup> b2b3 <sup>o</sup> b3b4b6 <sup>o</sup> b6b7b8b9 <sup>o</sup> b9b10y1y2y3 <sup>y</sup> 3y4 <sup>y</sup> 4y5 <sup>y</sup> 5y6 <sup>y</sup> 6y7 <sup>y</sup> 7y8 <sup>y</sup> 8y9 <sup>y</sup> 9y10 <sup>y</sup> 10y11y12 <sup>y</sup> 12y12                                                                                 | 1354.62            | 24.153               | 921265    | 2 | 677.81        | -1.35           |
| P63261 ACTG_HUMAN Actin | 7            |                                             | DLYANTVLSGGTTMYPGIADR           | 291                    | 21                      | 33                       | 256.16 | b2b3b4b6 <sup>o</sup> b6b7 <sup>o</sup> b7b8 <sup>o</sup> b8b10b11b13b14 <sup>o</sup> b14b15 <sup>o</sup> b15y1y2y3 <sup>y</sup> 3y4y5y6y7y8y9y12y13 <sup>y</sup> 13y14y16y17y21                                                                                                                                                         | 2215.08            | 77.559               | 850144    | 2 | 1108.04       | 5.62            |
| P63261 ACTG_HUMAN Actin | 8            |                                             | GYSFTTAAER                      | 196                    | 10                      | 18                       | 99.95  | b2b3 <sup>o</sup> b3b5 <sup>o</sup> b5b10y1y2y3y4 <sup>y</sup> 4y5y6 <sup>y</sup> 6y7y8 <sup>y</sup> 8y10                                                                                                                                                                                                                                | 1132.52            | 43.174               | 711678    | 2 | 566.77        | -1.94           |
| P63261 ACTG_HUMAN Actin | 9            |                                             | HQGVVMVGMGQK                    | 39                     | 11                      | 31                       | 200.62 | b1b2 <sup>o</sup> b2b3b4 <sup>o</sup> b4b5b6 <sup>o</sup> b6b7 <sup>o</sup> b7b8 <sup>o</sup> b8b9b10b11y1y2 <sup>y</sup> 2y3 <sup>y</sup> 3y4 <sup>y</sup> 4y5y6y7y9 <sup>y</sup> 9y10 <sup>y</sup> 10y11                                                                                                                               | 1171.57            | 33.593               | 456338    | 2 | 586.29        | -2.19           |
| P63261 ACTG_HUMAN Actin | 10           |                                             | DSYVGDEAQS K                    | 50                     | 11                      | 9                        | 55.94  | b2 <sup>o</sup> b2b8y3y4y7 <sup>y</sup> 7y8y11                                                                                                                                                                                                                                                                                           | 1198.52            | 26.497               | 440655    | 2 | 599.76        | -3.16           |
| P63261 ACTG_HUMAN Actin | 11           |                                             | QEYDESGPSIVHRK                  | 359                    | 14                      | 19                       | 139.44 | b3 <sup>o</sup> b3 <sup>o</sup> b3b14y2y3y4y5y6 <sup>y</sup> 6y7y8y9y10 <sup>y</sup> 10y11y12y14 <sup>y</sup> 14                                                                                                                                                                                                                         | 1644.78            | 32.265               | 409068    | 3 | 548.93        | -12.62          |

|                         |    |                       |                             |     |    |    |        |                                                                                                                                         |         |         |         |   |         |        |
|-------------------------|----|-----------------------|-----------------------------|-----|----|----|--------|-----------------------------------------------------------------------------------------------------------------------------------------|---------|---------|---------|---|---------|--------|
| P63261 ACTG_HUMAN Actin | 12 |                       | KDLYANTVLSGGTTMYPGIADR      | 290 | 22 | 40 | 273.76 | b3°b3b4b6b7°b7b8°b8*<br>b8b10°b10b12°b12b13<br>*b13b14°b14°b14b15°b<br>15b16b22°b22y1y2y3y4<br>y5y6y7y8y9y10y11y12y<br>13°y13y14°y14y22 | 2343.16 | 69.035  | 313777  | 3 | 781.72  | -2.92  |
| P63261 ACTG_HUMAN Actin | 13 | Carbamidomethyl+C(2)  | LCYVALDFEQEMATAASSSSLEK     | 215 | 23 | 19 | 118.82 | b2b3b6b12°b12y1y4y6y<br>7y8°y8y9°y9y10y11°y11<br>y12y13y23                                                                              | 2550.17 | 93.253  | 208186  | 3 | 850.73  | -0.67  |
| P63261 ACTG_HUMAN Actin | 14 |                       | QEYDESGPSIVHR               | 359 | 13 | 14 | 111.95 | y1y2y3y4y5y6y8y9°y9y<br>10y11°y11y13°y13                                                                                                | 1516.68 | 38.036  | 189555  | 3 | 506.23  | -13.60 |
| P63261 ACTG_HUMAN Actin | 15 | Carbamidomethyl+C(1)  | CDVDIRK                     | 284 | 7  | 15 | 93.3   | b1b2°b2b3b4b6°b6y2y3<br>y4°y4y5y6°y6y7                                                                                                  | 905.44  | 22.962  | 144435  | 2 | 453.22  | -11.39 |
| P63261 ACTG_HUMAN Actin | 16 |                       | IAPPERK                     | 328 | 8  | 12 | 75.72  | b2b3y2y3°y3y4°y4y5°y5<br>y6y7y8                                                                                                         | 923.56  | 27.078  | 125675  | 2 | 462.28  | -12.49 |
| P63261 ACTG_HUMAN Actin | 17 |                       | IAPPER                      | 328 | 7  | 9  | 53.66  | y1y2y3°y3y4°y4y5y6y7                                                                                                                    | 795.46  | 33.657  | 55338   | 2 | 398.24  | -10.67 |
| P63261 ACTG_HUMAN Actin | 18 |                       | HQGVVMVGMGQKDSYVGDEAQS<br>K | 39  | 22 | 6  | 25.58  | b3b8b13y7y13y22                                                                                                                         | 2351.05 | 58.985  | 27301   | 3 | 784.35  | -12.25 |
| P63261 ACTG_HUMAN Actin | 19 |                       | SYELPDGQVITIGNER            | 238 | 16 | 4  | 17.15  | b6y2y9y14                                                                                                                               | 1790.87 | 71.932  | 24055   | 3 | 597.63  | -10.22 |
| P63261 ACTG_HUMAN Actin | 20 |                       | YSVWIGGSILASLSTFQQMWISK     | 336 | 23 | 13 | 78.42  | b2b3b5b7b9°b9b10y2y4<br>y5y6y7°y7                                                                                                       | 2602.34 | 136.474 | 22774   | 3 | 868.12  | -0.75  |
| P63261 ACTG_HUMAN Actin | 21 |                       | IWHHTFYNELR                 | 84  | 11 | 10 | 81.91  | b4b9y2y3y5°y5y6y7y8y<br>11                                                                                                              | 1515.75 | 56.173  | 16028   | 2 | 758.38  | 0.72   |
| P63261 ACTG_HUMAN Actin | 22 | Carbamidomethyl+C(16) | EEEIAALVIDNGSGMCK           | 1   | 17 | 5  | 27.38  | b13b14°b14b16y10                                                                                                                        | 1835.87 | 65.001  | 2704    | 2 | 918.44  | 8.91   |
| P63261 ACTG_HUMAN Actin | 23 |                       | VAPEEHPVLLTEAPLNPK          | 95  | 18 | 33 | 261.94 | b4b5b6b8b9°b9b10°b10<br>b12b13b16y3°y3y4y5°y<br>5y6°y6y7y7y9°y9y10°y<br>10y11y12°y12y13y14°y<br>14y16°y16°y16                           | 1954.07 | 61.321  | 604520  | 2 | 977.54  | 3.50   |
| P63261 ACTG_HUMAN Actin | 24 | Phosphoryl STY()      | DLYANTVLSGGTTMYPGIADR       | 291 | 21 | 3  | 13.86  | b7b12y9                                                                                                                                 | 2295.06 | 105.012 | 1698    | 4 | 574.52  | 12.45  |
| P63261 ACTG_HUMAN Actin | 25 | Oxidation+M()         | DLYANTVLSGGTTMYPGIADR       | 291 | 21 | 3  | 13.86  | b3y7y14                                                                                                                                 | 2231.08 | 70.861  | 35643   | 2 | 1116.04 | 7.88   |
| P63261 ACTG_HUMAN Actin | 26 | Oxidation+M()         | KDLYANTVLSGGTTMYPGIADR      | 290 | 22 | 3  | 13.43  | b8y7y14                                                                                                                                 | 2359.14 | 62.964  | 6536    | 3 | 787.05  | -9.83  |
| P63261 ACTG_HUMAN Actin | 27 |                       | VGDEAQSQR                   | 53  | 9  | 3  | 29.46  | b3b6b7                                                                                                                                  | 989.50  | 24.160  | 107517  | 2 | 495.25  | -2.47  |
| P63261 ACTG_HUMAN Actin | 28 |                       | AGDDAPR                     | 21  | 7  | 4  | 36.89  | b3b4b5°b5                                                                                                                               | 701.32  | 31.399  | 67450   | 1 | 701.32  | 1.04   |
| P63261 ACTG_HUMAN Actin | 29 |                       | GPSIVHRK                    | 365 | 8  | 3  | 15.6   | b3°b3b6                                                                                                                                 | 893.52  | 32.260  | 66266   | 2 | 447.27  | -8.54  |
| P63261 ACTG_HUMAN Actin | 30 |                       | PSIVHRK                     | 366 | 7  | 2  | 7.31   | b3°b3                                                                                                                                   | 836.50  | 32.278  | 40911   | 2 | 418.75  | -10.00 |
| P63261 ACTG_HUMAN Actin | 31 |                       | IAPPERK                     | 329 | 7  | 0  | 1.21   |                                                                                                                                         | 810.47  | 27.082  | 36370   | 2 | 405.74  | -11.75 |
| P63261 ACTG_HUMAN Actin | 32 |                       | SFTTAER                     | 198 | 8  | 1  | 8.25   | b3                                                                                                                                      | 912.44  | 43.141  | 17425   | 1 | 912.44  | 1.81   |
| P63261 ACTG_HUMAN Actin | 33 |                       | SIVGRPR                     | 32  | 7  | 4  | 31.28  | b3b5b6°b6                                                                                                                               | 784.47  | 56.151  | 17298   | 2 | 392.74  | -9.10  |
| P63261 ACTG_HUMAN Actin | 34 |                       | GFAGDDAPR                   | 19  | 9  | 2  | 22.43  | b4b5                                                                                                                                    | 905.41  | 31.341  | 5411    | 1 | 905.41  | -4.38  |
| P63261 ACTG_HUMAN Actin | 35 |                       | DEAQSQR                     | 55  | 7  | 2  | 7.6    | b3°b3                                                                                                                                   | 833.41  | 24.194  | 4130    | 2 | 417.21  | -5.27  |
| P63261 ACTG_HUMAN Actin | 36 |                       | QEYDESGPSIVHR               | 359 | 13 | 0  | 3.24   |                                                                                                                                         | 1499.67 | 38.039  | 13207   | 3 | 500.56  | 1.63   |
| P60709 ACTB_HUMAN Actin | 1  |                       | AGFAGDDAPR                  | 18  | 10 | 19 | 144.36 | b2b3b4b5b8°b8y1y2y3y<br>4°y4y5y6°y6y7°y7y8y9y<br>10                                                                                     | 976.44  | 31.402  | 2485698 | 2 | 488.72  | -6.13  |

|                         |    |                                                |                                    |     |    |    |        |                                                                                                                                              |         |        |         |   |         |        |
|-------------------------|----|------------------------------------------------|------------------------------------|-----|----|----|--------|----------------------------------------------------------------------------------------------------------------------------------------------|---------|--------|---------|---|---------|--------|
| P60709 ACTB_HUMAN Actin | 2  |                                                | EITALAPSTMK                        | 315 | 11 | 27 | 174.2  | b1b2°b2b3°b3b5°b5b6b8b9b10b11y1y2y3°y3y4°y4y5°y5y6°y6y7y8y9°y9y11                                                                            | 1161.62 | 50.848 | 1793835 | 2 | 581.31  | -0.95  |
| P60709 ACTB_HUMAN Actin | 3  | Carbamidomethyl+C(1);<br>Carbamidomethyl+C(16) | CPEALFQPSFLGMESCGIHETTFS<br>IMK    | 256 | 28 | 48 | 323.33 | b2b3b4°b4b5b6b7°b7b8°b8b10b11°b11b12°b12b13°b13°b13b14°b14b28y1y2y3y4y5°y5y6y8y9y10y12y14*y14y15°y15y17°y17y18°y18y20y21*y21y22*y22y23y24y28 | 3231.47 | 92.612 | 1596836 | 3 | 1077.83 | 1.59   |
| P60709 ACTB_HUMAN Actin | 4  |                                                | TTGIVMDSGDGVTHTVPIIEGYAL<br>PHAILR | 147 | 30 | 37 | 265.32 | b2°b2b3°b3b4°b4b6°b6b18°b18b20b26°b26b30y2y3y5y6y7y8y9y10y11°y11y12y14y15y16y17y20y23y24y25°y25y26y28y30                                     | 3183.58 | 80.366 | 1231109 | 4 | 796.65  | -9.28  |
| P60709 ACTB_HUMAN Actin | 5  |                                                | AVFPSIVGRPR                        | 28  | 11 | 15 | 136.98 | b2b3b4b9y1y2y3y4y5y6y7y8y9y10y11                                                                                                             | 1198.70 | 56.143 | 1059745 | 2 | 599.86  | -2.24  |
| P60709 ACTB_HUMAN Actin | 6  |                                                | DSYVGDEAQSQR                       | 50  | 12 | 38 | 214.24 | b2°b2b3°b3b4b6°b6b7b8b9°b9b10y1y2y3°y3y4°y4y5°y5°y5y6°y6°y6y7°y7y8°y8°y8y9°y9°y9y10°y10y11y12°y12                                            | 1354.62 | 24.153 | 921265  | 2 | 677.81  | -1.35  |
| P60709 ACTB_HUMAN Actin | 7  |                                                | DLYANTVLSGGTTMYPGIADR              | 291 | 21 | 33 | 256.16 | b2b3b4b6°b6b7°b7b8°b8b10b11b13b14°b14b15°b15y1y2y3°y3y4y5y6y7y8y9y12y13°y13y14y16y17y21                                                      | 2215.08 | 77.559 | 850144  | 2 | 1108.04 | 5.62   |
| P60709 ACTB_HUMAN Actin | 8  |                                                | GYSFTTAER                          | 196 | 10 | 18 | 99.95  | b2b3°b3b5°b5b10y1y2y3y4°y4y5y6°y6y7y8y8y10                                                                                                   | 1132.52 | 43.174 | 711678  | 2 | 566.77  | -1.94  |
| P60709 ACTB_HUMAN Actin | 9  |                                                | HQGVMMVGMGQK                       | 39  | 11 | 31 | 200.62 | b1b2°b2b3b4°b4b5b6°b6b7°b7b8°b8b9b10b11y1y2°y2y3°y3y4°y4y5y6y7y9°y9y10°y10y11                                                                | 1171.57 | 33.593 | 456338  | 2 | 586.29  | -2.19  |
| P60709 ACTB_HUMAN Actin | 10 |                                                | DSYVGDEAQSQR                       | 50  | 11 | 9  | 55.94  | b2°b2b8y3y4y7°y7y8y11                                                                                                                        | 1198.52 | 26.497 | 440655  | 2 | 599.76  | -3.16  |
| P60709 ACTB_HUMAN Actin | 11 |                                                | QEYDESGPSIVHRK                     | 359 | 14 | 19 | 139.44 | b3°b3°b3b14y2y3y4y5y6°y6y7y8y9y10°y10y11y12y14°y14                                                                                           | 1644.78 | 32.265 | 409068  | 3 | 548.93  | -12.62 |
| P60709 ACTB_HUMAN Actin | 12 |                                                | KDLYANTVLSGGTTMYPGIADR             | 290 | 22 | 40 | 273.76 | b3°b3b4b6b7°b7b8°b8°b8b10°b10b12°b12b13°b13b14°b14°b14b15°b15b16b22°b22y1y2y3y4y5y6y7y8y9y10y11y12y13°y13y14°y14y22                          | 2343.16 | 69.035 | 313777  | 3 | 781.72  | -2.92  |

|                         |    |                                                                  |                                    |     |    |    |        |                                                                                                                                          |         |         |         |   |         |        |
|-------------------------|----|------------------------------------------------------------------|------------------------------------|-----|----|----|--------|------------------------------------------------------------------------------------------------------------------------------------------|---------|---------|---------|---|---------|--------|
| P60709 ACTB_HUMAN Actin | 13 | Carbamidomethyl+C(2)                                             | LCYVALDFEQEMATAASSSSLEK            | 215 | 23 | 19 | 118.82 | b2b3b6b12°b12y1y4y6y7y8°y8y9°y9y10y11°y11y12y13y23                                                                                       | 2550.17 | 93.253  | 208186  | 3 | 850.73  | -0.67  |
| P60709 ACTB_HUMAN Actin | 14 |                                                                  | QEYDESGPSIVHR                      | 359 | 13 | 14 | 111.95 | y1y2y3y4y5y6y8y9°y9y10y11°y11y13*y13                                                                                                     | 1516.68 | 38.036  | 189555  | 3 | 506.23  | -13.60 |
| P60709 ACTB_HUMAN Actin | 15 | Carbamidomethyl+C(1)                                             | CDVDIRK                            | 284 | 7  | 15 | 93.3   | b1b2°b2b3b4b6°b6y2y3y4°y4y5y6°y6y7                                                                                                       | 905.44  | 22.962  | 144435  | 2 | 453.22  | -11.39 |
| P60709 ACTB_HUMAN Actin | 16 |                                                                  | IIAPPERK                           | 328 | 8  | 12 | 75.72  | b2b3y2y3°y3y4°y4y5°y5y6y7y8                                                                                                              | 923.56  | 27.078  | 125675  | 2 | 462.28  | -12.49 |
| P60709 ACTB_HUMAN Actin | 17 |                                                                  | IIAPPER                            | 328 | 7  | 9  | 53.66  | y1y2y3°y3y4°y4y5y6y7                                                                                                                     | 795.46  | 33.657  | 55338   | 2 | 398.24  | -10.67 |
| P60709 ACTB_HUMAN Actin | 18 |                                                                  | HQGVVMVGMGQKDSYVGDEAQS<br>K        | 39  | 22 | 6  | 25.58  | b3b8b13y7y13y22                                                                                                                          | 2351.05 | 58.985  | 27301   | 3 | 784.35  | -12.25 |
| P60709 ACTB_HUMAN Actin | 19 |                                                                  | SYELPDGQVITIGNER                   | 238 | 16 | 4  | 17.15  | b6y2y9y14                                                                                                                                | 1790.87 | 71.932  | 24055   | 3 | 597.63  | -10.22 |
| P60709 ACTB_HUMAN Actin | 20 |                                                                  | YSVWIGGSILASLSTFQQMWISK            | 336 | 23 | 13 | 78.42  | b2b3b5b7b9°b9b10y2y4y5y6y7*y7                                                                                                            | 2602.34 | 136.474 | 22774   | 3 | 868.12  | -0.75  |
| P60709 ACTB_HUMAN Actin | 21 |                                                                  | IWHHTFYNELR                        | 84  | 11 | 10 | 81.91  | b4b9y2y3y5°y5y6y7y8y11                                                                                                                   | 1515.75 | 56.173  | 16028   | 2 | 758.38  | 0.72   |
| P60709 ACTB_HUMAN Actin | 22 | Carbamidomethyl+C(17)                                            | MDDDIAALVVDNGSGMCK                 | 0   | 18 | 6  | 22.97  | b14b18°b18y16y17*y17                                                                                                                     | 1910.80 | 82.052  | 1758    | 3 | 637.61  | -13.42 |
| P60709 ACTB_HUMAN Actin | 23 |                                                                  | GILTLK                             | 62  | 6  | 6  | 53.26  | b4°b4y3y4°y4y5                                                                                                                           | 644.43  | 53.290  | 245835  | 1 | 644.43  | -0.66  |
| P60709 ACTB_HUMAN Actin | 24 | Carbamidomethyl+C(1)                                             | CDVDIR                             | 284 | 6  | 6  | 53.26  | b3y3°y3y4°y4y5                                                                                                                           | 777.35  | 28.988  | 89994   | 2 | 389.18  | -11.46 |
| P60709 ACTB_HUMAN Actin | 25 | Carbamidomethyl+C(3);<br>Carbamidomethyl+C(18)                   | FRCPEALFQPSFLGMESCGIHETT<br>NSIMK  | 254 | 30 | 45 | 313.19 | b3b5b6b7b8b9°b9b11°b11*b11b12*b12b14b28y4°y4y5y6°y6*y6y7y9°y9y10°y10*y10y11y12y13y14°y14*y14y15°y15y16y17°y17y18y19y20y21°y21y22°y22*y22 | 3534.61 | 90.624  | 2245620 | 4 | 884.41  | -6.70  |
| P60709 ACTB_HUMAN Actin | 26 | Carbamidomethyl+C(17)                                            | MDDDIAALVVDNGSGMCKAGFA<br>GDDAPR   | 0   | 28 | 5  | 17.31  | b15°b15y8y10y16                                                                                                                          | 2868.27 | 94.611  | 29425   | 4 | 717.82  | 3.06   |
| P60709 ACTB_HUMAN Actin | 27 |                                                                  | DLYANTVLSGGTTMYPGIADRM<br>K        | 291 | 24 | 5  | 28.29  | y5y6y12*y12y14                                                                                                                           | 2602.29 | 71.066  | 19234   | 4 | 651.33  | 8.91   |
| P60709 ACTB_HUMAN Actin | 28 |                                                                  | QEYDESGPSIVHRK                     | 359 | 14 | 10 | 126.23 | b3y3y4y5y6y7y8y9y10y11                                                                                                                   | 1644.78 | 37.848  | 6840    | 3 | 548.93  | -9.87  |
| P60709 ACTB_HUMAN Actin | 29 | Carbamidomethyl+C(4)                                             | EKLCYVALDFEQEMATAASSSSLE<br>K      | 213 | 25 | 3  | 21.94  | b5b6y21                                                                                                                                  | 2807.31 | 68.293  | 1598    | 3 | 936.44  | 0.96   |
| P60709 ACTB_HUMAN Actin | 30 | Phosphoryl STY()                                                 | IWHHTFYNELR                        | 84  | 11 | 3  | 27.3   | b6b7y6                                                                                                                                   | 1595.72 | 43.054  | 3288    | 2 | 798.36  | 5.89   |
| P60709 ACTB_HUMAN Actin | 31 | Phosphoryl STY()                                                 | KDLYANTVLSGGTTMYPGIADR             | 290 | 22 | 5  | 20.85  | b3b8*b8b15y11                                                                                                                            | 2423.15 | 87.874  | 2189    | 2 | 1212.08 | 11.99  |
| P60709 ACTB_HUMAN Actin | 32 | Oxidation+M()                                                    | TTGIVMDSGDGVTHTVPIYEGYAL<br>PHAILR | 147 | 30 | 7  | 35.32  | b12°b12b13b16y5y6y14                                                                                                                     | 3199.58 | 77.245  | 98583   | 4 | 800.65  | -7.63  |
| P60709 ACTB_HUMAN Actin | 33 | Carbamidomethyl+C(1);<br>Carbamidomethyl+C(16)<br>;Oxidation+M() | CPEALFQPSFLGMESCGIHETTFS<br>IMK    | 256 | 28 | 5  | 14.89  | b6b14y5°y5y9                                                                                                                             | 3247.45 | 105.232 | 3486    | 3 | 1083.16 | -0.68  |
| P60709 ACTB_HUMAN Actin | 34 |                                                                  | FPSIVGRPR                          | 30  | 9  | 7  | 50.51  | b3°b3b4b7°b7b8°b8                                                                                                                        | 1028.59 | 56.144  | 1878084 | 2 | 514.80  | -6.29  |
| P60709 ACTB_HUMAN Actin | 35 |                                                                  | PSIVGRPR                           | 31  | 8  | 4  | 18.86  | b3°b3b6°b6                                                                                                                               | 881.52  | 56.138  | 813566  | 2 | 441.26  | -12.74 |
| P60709 ACTB_HUMAN Actin | 36 |                                                                  | YVGDEAQSQR                         | 52  | 10 | 1  | 7.6    | b9                                                                                                                                       | 1152.56 | 24.169  | 119467  | 2 | 576.78  | -3.50  |
| P60709 ACTB_HUMAN Actin | 37 |                                                                  | VFPSIVGRPR                         | 29  | 10 | 0  | 2.43   |                                                                                                                                          | 1127.66 | 56.135  | 87758   | 2 | 564.34  | -4.22  |
| P60709 ACTB_HUMAN Actin | 38 |                                                                  | SGPSIVHRK                          | 364 | 9  | 2  | 7.31   | b3°b3                                                                                                                                    | 980.56  | 32.272  | 57493   | 2 | 490.78  | -4.17  |
| P60709 ACTB_HUMAN Actin | 39 |                                                                  | FAGDDAPR                           | 20  | 8  | 0  | 2.02   |                                                                                                                                          | 848.38  | 31.375  | 54675   | 2 | 424.70  | -7.05  |
| P60709 ACTB_HUMAN Actin | 40 |                                                                  | TALAPSTMK                          | 317 | 9  | 0  | 2.43   |                                                                                                                                          | 919.49  | 50.865  | 24076   | 1 | 919.49  | 1.66   |

|                                          |    |                       |                         |     |    |    |        |                                                                         |         |        |        |   |         |        |
|------------------------------------------|----|-----------------------|-------------------------|-----|----|----|--------|-------------------------------------------------------------------------|---------|--------|--------|---|---------|--------|
| P60709 ACTB_HUMAN Actin                  | 41 |                       | MVGMGQK                 | 43  | 7  | 0  | 2.43   |                                                                         | 750.36  | 33.561 | 13853  | 1 | 750.36  | -1.38  |
| P60709 ACTB_HUMAN Actin                  | 42 |                       | LAPSTMK                 | 319 | 7  | 1  | 7.86   | b4                                                                      | 747.41  | 50.894 | 12767  | 1 | 747.41  | 1.06   |
| P68871 HBB_HUMAN Hemoglobin subunit beta | 1  |                       | LLVVYPWTQR              | 31  | 10 | 18 | 116.17 | b2b3b4b5y1y2*y2y3*y3y4y5*y5*y5y6*y6y7y8y10                              | 1274.72 | 79.048 | 653049 | 2 | 637.86  | -4.88  |
| P68871 HBB_HUMAN Hemoglobin subunit beta | 2  |                       | EFTPPVQAAYQK            | 121 | 12 | 20 | 121.95 | b2b3*b3b4b10*b10y1y2*y2y3*y3y4y6*y6y7y8y9y10*y10y12                     | 1378.70 | 50.780 | 391111 | 2 | 689.85  | 1.51   |
| P68871 HBB_HUMAN Hemoglobin subunit beta | 3  |                       | VNVDEVGGEALGR           | 18  | 13 | 26 | 177.43 | b2*b2b3b4b5*b5b6*b6b11*b11y2y3y4y6y7y8y9*y9y10*y10y11*y11y12*y12y13*y13 | 1314.67 | 51.336 | 350446 | 2 | 657.84  | 0.93   |
| P68871 HBB_HUMAN Hemoglobin subunit beta | 4  | Carbamidomethyl+C(8)  | LLGNVLCVLAHHFGK         | 105 | 16 | 17 | 166.68 | b2b3b4b5*b5y2y3y4y5y6y8y9y10y11y14y15y16                                | 1776.98 | 92.437 | 345163 | 3 | 593.00  | -10.30 |
| P68871 HBB_HUMAN Hemoglobin subunit beta | 5  |                       | FFESFGDLSTPDAVMGNPK     | 41  | 19 | 11 | 85.14  | b2y2y4y5y9y10y11y12y14y16y19                                            | 2058.96 | 82.465 | 324875 | 2 | 1029.98 | 3.91   |
| P68871 HBB_HUMAN Hemoglobin subunit beta | 6  |                       | SAVTALWGK               | 9   | 9  | 8  | 67.68  | y1y2y3y4y6y7y8y9                                                        | 932.51  | 61.365 | 240552 | 2 | 466.76  | -8.18  |
| P68871 HBB_HUMAN Hemoglobin subunit beta | 7  |                       | VVAGVANALAHK            | 133 | 12 | 12 | 95.33  | b1b2y2y3y4y5y6*y6y7y9y10y12                                             | 1149.67 | 42.683 | 111240 | 2 | 575.34  | -4.57  |
| P68871 HBB_HUMAN Hemoglobin subunit beta | 8  | Carbamidomethyl+C(11) | GTFATLSELHCDK           | 83  | 13 | 16 | 133.81 | b3*b3b4b8b12y1y3y4y5*y5y7*y7y8y9y11y13                                  | 1478.70 | 54.319 | 82014  | 2 | 739.85  | 1.90   |
| P68871 HBB_HUMAN Hemoglobin subunit beta | 9  |                       | LHVDPENFR               | 96  | 9  | 7  | 67.68  | b3b8y3*y3y5y7y9                                                         | 1126.57 | 47.479 | 51881  | 2 | 563.79  | 0.98   |
| P68871 HBB_HUMAN Hemoglobin subunit beta | 10 | Carbamidomethyl+C(11) | GTFATLSELHCDKLHVDPENFR  | 83  | 22 | 5  | 20.85  | b11y3*y3y5y17                                                           | 2586.22 | 67.990 | 230095 | 4 | 647.31  | -9.72  |
| P68871 HBB_HUMAN Hemoglobin subunit beta | 11 |                       | SAVTALWGKVNVDDEVGGEALGR | 9   | 22 | 3  | 13.43  | b14y12y14                                                               | 2228.17 | 86.008 | 13780  | 4 | 557.80  | 0.77   |
| P68871 HBB_HUMAN Hemoglobin subunit beta | 12 |                       | AGVANALAHK              | 135 | 10 | 2  | 17.5   | b4b7                                                                    | 951.53  | 42.683 | 77604  | 2 | 476.27  | -10.65 |
| P68871 HBB_HUMAN Hemoglobin subunit beta | 13 | Carbamidomethyl+C(2)  | VCVLAHHFGK              | 111 | 10 | 0  | 4.45   |                                                                         | 1167.59 | 92.464 | 42302  | 2 | 584.30  | -12.75 |
| P68871 HBB_HUMAN Hemoglobin subunit beta | 14 |                       | VTALWGK                 | 11  | 7  | 1  | 8.81   | b5                                                                      | 774.45  | 61.362 | 20438  | 1 | 774.45  | -6.38  |
| P68871 HBB_HUMAN Hemoglobin subunit beta | 15 |                       | VAGVANALAHK             | 134 | 11 | 1  | 7.6    | b5                                                                      | 1050.60 | 42.689 | 16849  | 2 | 525.81  | -1.16  |
| P68871 HBB_HUMAN Hemoglobin subunit beta | 16 | Carbamidomethyl+C(3)  | LVCVLAHHFGK             | 110 | 11 | 1  | 7.25   | b3                                                                      | 1280.68 | 92.372 | 12437  | 2 | 640.84  | -11.53 |
| P68871 HBB_HUMAN Hemoglobin subunit beta | 17 | Carbamidomethyl+C(7)  | LGNVLCVLAHHFGK          | 106 | 15 | 0  | 4.45   |                                                                         | 1663.89 | 92.421 | 8045   | 3 | 555.30  | -14.75 |
| P68871 HBB_HUMAN Hemoglobin subunit beta | 18 | Carbamidomethyl+C(9)  | FATLSELHCDK             | 85  | 11 | 3  | 28.11  | b5b6b8                                                                  | 1320.63 | 54.325 | 5275   | 3 | 440.88  | 1.57   |
| P68871 HBB_HUMAN Hemoglobin subunit beta | 19 | Carbamidomethyl+C(4)  | VLVCVLAHHFGK            | 109 | 12 | 0  | 4.45   |                                                                         | 1379.75 | 92.405 | 1866   | 2 | 690.38  | -10.79 |
| P68871 HBB_HUMAN Hemoglobin subunit beta | 20 |                       | EFTPPVQAAYQK            | 121 | 12 | 0  | 2.83   |                                                                         | 1360.69 | 50.775 | 3520   | 2 | 680.85  | 0.81   |
| P68871 HBB_HUMAN Hemoglobin subunit beta | 21 | Carbamidomethyl+C(8)  | LLGNVLCVLAHHFGK         | 105 | 16 | 0  | 4.45   |                                                                         | 1759.95 | 92.432 | 3249   | 4 | 440.74  | -9.57  |
| P68871 HBB_HUMAN Hemoglobin subunit beta | 22 |                       | LHVDPENFR               | 96  | 9  | 0  | 1.62   |                                                                         | 1109.52 | 47.477 | 1804   | 3 | 370.51  | -11.55 |
| P07737 PROF1_HUMAN Profilin-1            | 1  |                       | TFVNITPAEVGVLVGK        | 38  | 16 | 24 | 129    | b1b2*b2b3b4*b4*b4b5*b5*b5b6*b6*b6b14y1y2y3y6y7y10y11y12y13y16           | 1643.94 | 86.027 | 364483 | 2 | 822.47  | 1.34   |

|                               |    |                                         |                                          |     |    |    |        |                                                                                                      |         |         |         |   |        |        |
|-------------------------------|----|-----------------------------------------|------------------------------------------|-----|----|----|--------|------------------------------------------------------------------------------------------------------|---------|---------|---------|---|--------|--------|
| P07737 PROF1_HUMAN Profilin-1 | 2  |                                         | SSFYVNGLTLLGGQK                          | 56  | 14 | 20 | 173.85 | b3°b3b4b5°b5b8b13y3y4*y4y5y6y7y8y9y10*y10y11*y11y14                                                  | 1470.76 | 67.638  | 349978  | 2 | 735.88 | 0.50   |
| P07737 PROF1_HUMAN Profilin-1 | 3  |                                         | STGGAPTFNVTVTK                           | 91  | 14 | 8  | 42.39  | b2b5°b5y4y9y10y12y14                                                                                 | 1379.72 | 52.277  | 266148  | 2 | 690.36 | 0.71   |
| P07737 PROF1_HUMAN Profilin-1 | 4  |                                         | TFVNITPAEVLVVGKDR                        | 38  | 18 | 17 | 109.6  | b2°b2b3°b3b4b5°b5b13y2y5y6y8y9y13y15y16y18                                                           | 1915.04 | 80.290  | 194461  | 3 | 639.02 | -14.79 |
| P07737 PROF1_HUMAN Profilin-1 | 5  |                                         | DSPSVWAAVPGK                             | 26  | 12 | 9  | 49.66  | b2b8y1y2y3y4y7y10y12                                                                                 | 1213.62 | 59.104  | 97737   | 2 | 607.31 | -1.61  |
| P07737 PROF1_HUMAN Profilin-1 | 6  |                                         | TLVLLMGK                                 | 108 | 8  | 6  | 77.48  | b3b4y3y4y5y6                                                                                         | 874.53  | 69.334  | 192814  | 2 | 437.77 | -16.96 |
| P07737 PROF1_HUMAN Profilin-1 | 7  |                                         | DSLLQDGEFSMDLR                           | 75  | 14 | 3  | 19.27  | b3y6y10                                                                                              | 1625.77 | 54.598  | 9735    | 2 | 813.39 | 16.22  |
| P07737 PROF1_HUMAN Profilin-1 | 8  | Carbamidomethyl+C(16);Phosphoryl STY(6) | AGWNAYIDNLMADGTCQDAIV<br>GYKDSPSVWAAVPGK | 1   | 37 | 13 | 85.52  | b4b6y3y5y7y11y12y15y23y24y25y27y30                                                                   | 3991.79 | 105.112 | 309600  | 4 | 998.70 | -1.59  |
| P68032 ACTC_HUMAN Actin       | 1  |                                         | AGFAGDDAPR                               | 20  | 10 | 19 | 144.36 | b2b3b4b5b8°b8y1y2y3y4°y4y5y6°y6y7°y7y8y9y10                                                          | 976.44  | 31.402  | 2485698 | 2 | 488.72 | -6.13  |
| P68032 ACTC_HUMAN Actin       | 2  |                                         | EITALAPSTMK                              | 317 | 11 | 27 | 174.2  | b1b2°b2b3°b3b5°b5b6b8b9b10b11y1y2y3°y3y4°y4y5°y5y6°y6y7y8y9°y9y11                                    | 1161.62 | 50.848  | 1793835 | 2 | 581.31 | -0.95  |
| P68032 ACTC_HUMAN Actin       | 3  |                                         | YPIEHGITNWDDMEK                          | 70  | 16 | 34 | 214.3  | b2b8°b8b9°b9b12°b12°b12b13°b13b14b15b16y1y2°y2y3y4y5°y5y6y7y8*y8y9y12*y12y13°y13y14y15*y15y16*y16    | 1960.92 | 66.930  | 1517031 | 2 | 980.96 | 4.05   |
| P68032 ACTC_HUMAN Actin       | 4  |                                         | AVFPSIVGRPR                              | 30  | 11 | 15 | 136.98 | b2b3b4b9y1y2y3y4y5y6y7y8y9y10y11                                                                     | 1198.70 | 56.143  | 1059745 | 2 | 599.86 | -2.24  |
| P68032 ACTC_HUMAN Actin       | 5  |                                         | DSYVGDEAQSQR                             | 52  | 12 | 38 | 214.24 | b2°b2b3°b3b4b6°b6b7b8b9°b9b10y1y2y3°y3y4*y4y5°y5°y5y6°y6*y6y7°y7*y7y8°y8*y8y9°y9*y9y10°y10y11y12*y12 | 1354.62 | 24.153  | 921265  | 2 | 677.81 | -1.35  |
| P68032 ACTC_HUMAN Actin       | 6  |                                         | HQGVMMVGMGQK                             | 41  | 11 | 31 | 200.62 | b1b2°b2b3b4°b4b5b6°b6b7°b7b8°b8b9b10b11y1y2°y2y3°y3y4y5y6y7y9*y9y10*y10y11                           | 1171.57 | 33.593  | 456338  | 2 | 586.29 | -2.19  |
| P68032 ACTC_HUMAN Actin       | 7  |                                         | DSYVGDEAQS                               | 52  | 11 | 9  | 55.94  | b2°b2b8y3y4y7°y7y8y11                                                                                | 1198.52 | 26.497  | 440655  | 2 | 599.76 | -3.16  |
| P68032 ACTC_HUMAN Actin       | 8  |                                         | IIAPPERK                                 | 330 | 8  | 12 | 75.72  | b2b3y2y3°y3y4°y4y5°y5y6y7y8                                                                          | 923.56  | 27.078  | 125675  | 2 | 462.28 | -12.49 |
| P68032 ACTC_HUMAN Actin       | 9  |                                         | IIAPPER                                  | 330 | 7  | 9  | 53.66  | y1y2y3°y3y4°y4y5y6y7                                                                                 | 795.46  | 33.657  | 55338   | 2 | 398.24 | -10.67 |
| P68032 ACTC_HUMAN Actin       | 10 |                                         | HQGVMMVGMGQKDSYVGDEAQS<br>K              | 41  | 22 | 6  | 25.58  | b3b8b13y7y13y22                                                                                      | 2351.05 | 58.985  | 27301   | 3 | 784.35 | -12.25 |
| P68032 ACTC_HUMAN Actin       | 11 |                                         | SYELPDGQVITIGNER                         | 240 | 16 | 4  | 17.15  | b6y2y9y14                                                                                            | 1790.87 | 71.932  | 24055   | 3 | 597.63 | -10.22 |
| P68032 ACTC_HUMAN Actin       | 12 |                                         | YSVWIGGSILASLSTFQQMWISK                  | 338 | 23 | 13 | 78.42  | b2b3b5b7b9°b9b10y2y4y5y6y7*y7                                                                        | 2602.34 | 136.474 | 22774   | 3 | 868.12 | -0.75  |
| P68032 ACTC_HUMAN Actin       | 13 |                                         | IWHHTFYNELR                              | 86  | 11 | 10 | 81.91  | b4b9y2y3y5°y5y6y7y8y11                                                                               | 1515.75 | 56.173  | 16028   | 2 | 758.38 | 0.72   |

|                         |    |                                             |                                     |     |    |    |        |                                                                                                      |         |         |         |   |         |        |
|-------------------------|----|---------------------------------------------|-------------------------------------|-----|----|----|--------|------------------------------------------------------------------------------------------------------|---------|---------|---------|---|---------|--------|
| P68032 ACTC_HUMAN Actin | 14 | Carbamidomethyl+C(2)                        | LCYVALDFENEMATAASSSSLEK             | 217 | 23 | 8  | 42.01  | b1b8b12y6y7y8°y8y15                                                                                  | 2536.18 | 101.262 | 6203    | 2 | 1268.59 | 7.70   |
| P68032 ACTC_HUMAN Actin | 15 | Carbamidomethyl+C(1); Phosphoryl STY()      | CPETLFQPSFIGMESAGIHETTYNSI MK       | 258 | 28 | 3  | 11.7   | b14y4y7                                                                                              | 3268.41 | 105.263 | 5309    | 3 | 1090.14 | -6.20  |
| P68032 ACTC_HUMAN Actin | 16 | Oxidation+M()                               | EITALAPSTMK                         | 317 | 11 | 5  | 36.71  | b4°b4y5y6y9                                                                                          | 1177.62 | 41.944  | 35008   | 2 | 589.31  | 1.45   |
| P68032 ACTC_HUMAN Actin | 17 | Oxidation+M()                               | DLYANNVLSGGTTMYPGIADR               | 293 | 21 | 6  | 21.68  | b3b6b8°b8*b8y14                                                                                      | 2244.03 | 97.296  | 4287    | 2 | 1122.52 | -14.90 |
| P68032 ACTC_HUMAN Actin | 18 | Oxidation+M()                               | KDLYANNVLSGGTTMYPGIADR              | 292 | 22 | 3  | 13.43  | b3b14y7                                                                                              | 2372.15 | 92.400  | 2387    | 3 | 791.39  | -0.82  |
| P68032 ACTC_HUMAN Actin | 19 |                                             | DSYVGDEAQSQR                        | 52  | 12 | 0  | 2.83   |                                                                                                      | 1337.60 | 24.186  | 21725   | 3 | 446.54  | 3.47   |
| P68133 ACTS_HUMAN Actin | 1  |                                             | AGFAGDDAPR                          | 20  | 10 | 19 | 144.36 | b2b3b4b5b8°b8y1y2y3y4°y4y5y6°y6y7°y7y8y9y10                                                          | 976.44  | 31.402  | 2485698 | 2 | 488.72  | -6.13  |
| P68133 ACTS_HUMAN Actin | 2  |                                             | EITALAPSTMK                         | 317 | 11 | 27 | 174.2  | b1b2°b2b3°b3b5°b5b6b8b9b10b11y1y2y3°y3y4°y4y5°y5y6°y6y7y8y9°y9y11                                    | 1161.62 | 50.848  | 1793835 | 2 | 581.31  | -0.95  |
| P68133 ACTS_HUMAN Actin | 3  |                                             | YPIEHGIITNWDDMEK                    | 70  | 16 | 34 | 214.3  | b2b8°b8b9°b9b12°b12°b12b13°b13b14b15b16y1y2°y2y3y4y5°y5y6y7y8°y8y9y12°y12y13°y13y14y15°y15y16°y16    | 1960.92 | 66.930  | 1517031 | 2 | 980.96  | 4.05   |
| P68133 ACTS_HUMAN Actin | 4  |                                             | AVFPSIVGRPR                         | 30  | 11 | 15 | 136.98 | b2b3b4b9y1y2y3y4y5y6y7y8y9y10y11                                                                     | 1198.70 | 56.143  | 1059745 | 2 | 599.86  | -2.24  |
| P68133 ACTS_HUMAN Actin | 5  |                                             | DSYVGDEAQSQR                        | 52  | 12 | 38 | 214.24 | b2°b2b3°b3b4b6°b6b7b8b9°b9b10y1y2y3°y3y4°y4y5°y5°y5y6°y6°y6y7°y7°y7y8°y8°y8y9°y9°y9y10°y10y11y12°y12 | 1354.62 | 24.153  | 921265  | 2 | 677.81  | -1.35  |
| P68133 ACTS_HUMAN Actin | 6  |                                             | HQGVMMVGMGQK                        | 41  | 11 | 31 | 200.62 | b1b2°b2b3b4°b4b5b6°b6b7°b7b8°b8b9b10b11y1y2°y2y3°y3y4°y4y5y6y7y9°y9y10°y10y11                        | 1171.57 | 33.593  | 456338  | 2 | 586.29  | -2.19  |
| P68133 ACTS_HUMAN Actin | 7  |                                             | DSYVGDEAQSQR                        | 52  | 11 | 9  | 55.94  | b2°b2b8y3y4y7°y7y8y11                                                                                | 1198.52 | 26.497  | 440655  | 2 | 599.76  | -3.16  |
| P68133 ACTS_HUMAN Actin | 8  |                                             | IIAPPERK                            | 330 | 8  | 12 | 75.72  | b2b3y2y3°y3y4°y4y5°y5y6y7y8                                                                          | 923.56  | 27.078  | 125675  | 2 | 462.28  | -12.49 |
| P68133 ACTS_HUMAN Actin | 9  |                                             | IIAPPER                             | 330 | 7  | 9  | 53.66  | y1y2y3°y3y4°y4y5y6y7                                                                                 | 795.46  | 33.657  | 55338   | 2 | 398.24  | -10.67 |
| P68133 ACTS_HUMAN Actin | 10 |                                             | HQGVMMVGMGQKDSYVGDEAQS K            | 41  | 22 | 6  | 25.58  | b3b8b13y7y13y22                                                                                      | 2351.05 | 58.985  | 27301   | 3 | 784.35  | -12.25 |
| P68133 ACTS_HUMAN Actin | 11 |                                             | SYELPDGQVITIGNER                    | 240 | 16 | 4  | 17.15  | b6y2y9y14                                                                                            | 1790.87 | 71.932  | 24055   | 3 | 597.63  | -10.22 |
| P68133 ACTS_HUMAN Actin | 12 |                                             | IWHHTFYNELR                         | 86  | 11 | 10 | 81.91  | b4b9y2y3y5°y5y6y7y8y11                                                                               | 1515.75 | 56.173  | 16028   | 2 | 758.38  | 0.72   |
| P68133 ACTS_HUMAN Actin | 13 | Carbamidomethyl+C(2)                        | LCYVALDFENEMATAASSSSLEK             | 217 | 23 | 8  | 42.01  | b1b8b12y6y7y8°y8y15                                                                                  | 2536.18 | 101.262 | 6203    | 2 | 1268.59 | 7.70   |
| P68133 ACTS_HUMAN Actin | 14 |                                             | KDLYANNVMSGGTTMYPGIADR              | 292 | 22 | 3  | 23.3   | y6y7y12                                                                                              | 2374.12 | 83.277  | 2577    | 3 | 792.04  | 0.21   |
| P68133 ACTS_HUMAN Actin | 15 |                                             | GILTLKYPIEHGIITNWDDMEK              | 64  | 22 | 11 | 102.69 | b3y3y4y5y6y7y12y13y15y16°y16                                                                         | 2586.29 | 83.146  | 476965  | 4 | 647.33  | -12.46 |
| P68133 ACTS_HUMAN Actin | 16 | Carbamidomethyl+C(1); Carbamidomethyl+C(29) | CPETLFQPSFIGMESAGIHETTYNSI MKCDIDIR | 258 | 34 | 8  | 27.83  | b6b8b12b18y12°y12y17y20                                                                              | 3960.84 | 96.097  | 186929  | 4 | 990.97  | 4.19   |

|                         |    |                                        |                                  |     |    |    |        |                                                                                                                      |         |         |         |   |         |        |
|-------------------------|----|----------------------------------------|----------------------------------|-----|----|----|--------|----------------------------------------------------------------------------------------------------------------------|---------|---------|---------|---|---------|--------|
| P68133 ACTS_HUMAN Actin | 17 |                                        | IKIAPPER                         | 328 | 9  | 7  | 74.88  | b4y3°y3y4y5y6y7                                                                                                      | 1036.65 | 44.157  | 35765   | 2 | 518.83  | -3.77  |
| P68133 ACTS_HUMAN Actin | 18 |                                        | DLYANNVMSGGTTMYPGIADRM<br>QK     | 293 | 24 | 9  | 48.06  | b3b8b14y5y9y10°y10*y<br>10y11                                                                                        | 2633.25 | 101.244 | 22106   | 3 | 878.42  | 12.15  |
| P68133 ACTS_HUMAN Actin | 19 |                                        | YPIEHGIITNWDDMEKIWHHTFYN<br>ELR  | 70  | 27 | 8  | 47.3   | b6b8b9b11b17y8y9*y9                                                                                                  | 3457.65 | 100.742 | 6073    | 3 | 1153.22 | 2.33   |
| P68133 ACTS_HUMAN Actin | 20 | Carbamidomethyl+C(4)                   | EKLCYVALDFENEMATAASSSSLE<br>K    | 215 | 25 | 6  | 16.29  | b7b12°b12y4y14°y14                                                                                                   | 2793.31 | 89.850  | 2572    | 3 | 931.78  | 5.24   |
| P68133 ACTS_HUMAN Actin | 21 | Oxidation+M()                          | YPIEHGIITNWDDMEK                 | 70  | 16 | 3  | 23.68  | b13y4y5                                                                                                              | 1976.89 | 59.910  | 54506   | 3 | 659.63  | -7.90  |
| P68133 ACTS_HUMAN Actin | 22 | Carbamidomethyl+C(2);<br>Oxidation+M() | LCYVALDFENEMATAASSSSLEK          | 217 | 23 | 7  | 29.45  | b3y6°y6y8y10y15*y15                                                                                                  | 2552.18 | 99.185  | 19965   | 3 | 851.40  | 10.52  |
| P62736 ACTA_HUMAN Actin | 1  |                                        | AGFAGDDAPR                       | 20  | 10 | 19 | 144.36 | b2b3b4b5b8°b8y1y2y3y<br>4°y4y5y6°y6y7°y7y8y9y<br>10                                                                  | 976.44  | 31.402  | 2485698 | 2 | 488.72  | -6.13  |
| P62736 ACTA_HUMAN Actin | 2  |                                        | EITALAPSTMK                      | 317 | 11 | 27 | 174.2  | b1b2°b2b3°b3b5°b5b6b<br>8b9b10b11y1y2y3°y3y4<br>°y4y5°y5y6°y6y7y8y9°y<br>9y11                                        | 1161.62 | 50.848  | 1793835 | 2 | 581.31  | -0.95  |
| P62736 ACTA_HUMAN Actin | 3  |                                        | YPIEHGIITNWDDMEK                 | 70  | 16 | 34 | 214.3  | b2b8°b8b9°b9b12°b12*<br>b12b13*b13b14b15b16<br>y1y2°y2y3y4y5°y5y6y7y<br>8*y8y9y12*y12y13°y13<br>y14y15*y15y16*y16    | 1960.92 | 66.930  | 1517031 | 2 | 980.96  | 4.05   |
| P62736 ACTA_HUMAN Actin | 4  |                                        | AVFPSIVGRPR                      | 30  | 11 | 15 | 136.98 | b2b3b4b9y1y2y3y4y5y6<br>y7y8y9y10y11                                                                                 | 1198.70 | 56.143  | 1059745 | 2 | 599.86  | -2.24  |
| P62736 ACTA_HUMAN Actin | 5  |                                        | DSYVGDEAQSQR                     | 52  | 12 | 38 | 214.24 | b2°b2b3°b3b4b6°b6b7b<br>8b9°b9b10y1y2y3°y3y4<br>*y4y5°y5*y5y6°y6*y6y<br>7°y7*y7y8°y8*y8y9°y9*<br>y9y10°y10y11y12*y12 | 1354.62 | 24.153  | 921265  | 2 | 677.81  | -1.35  |
| P62736 ACTA_HUMAN Actin | 6  |                                        | HQGVMVGMGQK                      | 41  | 11 | 31 | 200.62 | b1b2*b2b3b4*b4b5b6*<br>b6b7°b7b8°b8b9b10b1<br>1y1y2*y2y3*y3y4*y4y5<br>y6y7y9*y9y10*y10y11                            | 1171.57 | 33.593  | 456338  | 2 | 586.29  | -2.19  |
| P62736 ACTA_HUMAN Actin | 7  |                                        | DSYVGDEAQS                       | 52  | 11 | 9  | 55.94  | b2°b2b8y3y4y7°y7y8y1<br>1                                                                                            | 1198.52 | 26.497  | 440655  | 2 | 599.76  | -3.16  |
| P62736 ACTA_HUMAN Actin | 8  |                                        | IIAPPERK                         | 330 | 8  | 12 | 75.72  | b2b3y2y3°y3y4°y4y5°y5<br>y6y7y8                                                                                      | 923.56  | 27.078  | 125675  | 2 | 462.28  | -12.49 |
| P62736 ACTA_HUMAN Actin | 9  |                                        | IIAPPER                          | 330 | 7  | 9  | 53.66  | y1y2y3°y3y4°y4y5y6y7                                                                                                 | 795.46  | 33.657  | 55338   | 2 | 398.24  | -10.67 |
| P62736 ACTA_HUMAN Actin | 10 |                                        | HQGVMVGMGQKDSYVGDEAQS<br>K       | 41  | 22 | 6  | 25.58  | b3b8b13y7y13y22                                                                                                      | 2351.05 | 58.985  | 27301   | 3 | 784.35  | -12.25 |
| P62736 ACTA_HUMAN Actin | 11 |                                        | SYELPDGQVITIGNER                 | 240 | 16 | 4  | 17.15  | b6y2y9y14                                                                                                            | 1790.87 | 71.932  | 24055   | 3 | 597.63  | -10.22 |
| P62736 ACTA_HUMAN Actin | 12 |                                        | YSVWIGGSILASLSTFQQMWISK          | 338 | 23 | 13 | 78.42  | b2b3b5b7b9°b9b10y2y4<br>y5y6y7*y7                                                                                    | 2602.34 | 136.474 | 22774   | 3 | 868.12  | -0.75  |
| P62736 ACTA_HUMAN Actin | 13 | Carbamidomethyl+C(2)                   | LCYVALDFENEMATAASSSSLEK          | 217 | 23 | 8  | 42.01  | b1b8b12y6y7y8°y8y15                                                                                                  | 2536.18 | 101.262 | 6203    | 2 | 1268.59 | 7.70   |
| P62736 ACTA_HUMAN Actin | 14 | Carbamidomethyl+C(1);<br>Oxidation+M() | CPETLFQPSFIGMESAGIHETTYNSI<br>MK | 258 | 28 | 6  | 26.11  | b9b11b16y5y14y20                                                                                                     | 3204.46 | 81.375  | 2856    | 3 | 1068.83 | -1.30  |
| P63267 ACTH_HUMAN Actin | 1  |                                        | AGFAGDDAPR                       | 19  | 10 | 19 | 144.36 | b2b3b4b5b8°b8y1y2y3y<br>4°y4y5y6°y6y7°y7y8y9y<br>10                                                                  | 976.44  | 31.402  | 2485698 | 2 | 488.72  | -6.13  |



|                                                            |    |                                                |                              |     |    |    |        |                                                                                                      |         |         |         |   |         |        |
|------------------------------------------------------------|----|------------------------------------------------|------------------------------|-----|----|----|--------|------------------------------------------------------------------------------------------------------|---------|---------|---------|---|---------|--------|
| P63267 ACTH_HUMAN Actin                                    | 2  |                                                | EITALAPSTMK                  | 316 | 11 | 27 | 174.2  | b1b2°b2b3°b3b5°b5b6b8b9b10b11y1y2y3°y3y4°y4y5°y5y6°y6y7y8y9°y9y11                                    | 1161.62 | 50.848  | 1793835 | 2 | 581.31  | -0.95  |
| P63267 ACTH_HUMAN Actin                                    | 3  |                                                | YPIEHGIITNWDDMEK             | 69  | 16 | 34 | 214.3  | b2b8°b8b9°b9b12°b12°b12b13°b13b14b15b16y1y2°y2y3y4y5°y5y6y7y8°y8y9y12°y12y13°y13y14y15°y15y16°y16    | 1960.92 | 66.930  | 1517031 | 2 | 980.96  | 4.05   |
| P63267 ACTH_HUMAN Actin                                    | 4  |                                                | AVFPSIVGRPR                  | 29  | 11 | 15 | 136.98 | b2b3b4b9y1y2y3y4y5y6y7y8y9y10y11                                                                     | 1198.70 | 56.143  | 1059745 | 2 | 599.86  | -2.24  |
| P63267 ACTH_HUMAN Actin                                    | 5  |                                                | DSYVGDEAQSQR                 | 51  | 12 | 38 | 214.24 | b2°b2b3°b3b4b6°b6b7b8b9°b9b10y1y2y3°y3y4°y4y5°y5°y5y6°y6°y6y7°y7°y7y8°y8°y8y9°y9°y9y10°y10y11y12°y12 | 1354.62 | 24.153  | 921265  | 2 | 677.81  | -1.35  |
| P63267 ACTH_HUMAN Actin                                    | 6  |                                                | HQGVMTVMGMGQK                | 40  | 11 | 31 | 200.62 | b1b2°b2b3b4°b4b5b6°b6b7°b7b8°b8b9b10b11y1y2°y2y3°y3y4°y4y5y6y7y9°y9y10°y10y11                        | 1171.57 | 33.593  | 456338  | 2 | 586.29  | -2.19  |
| P63267 ACTH_HUMAN Actin                                    | 7  |                                                | DSYVGDEAQS                   | 51  | 11 | 9  | 55.94  | b2°b2b8y3y4y7°y7y8y11                                                                                | 1198.52 | 26.497  | 440655  | 2 | 599.76  | -3.16  |
| P63267 ACTH_HUMAN Actin                                    | 8  |                                                | IAPPERK                      | 329 | 8  | 12 | 75.72  | b2b3y2y3°y3y4°y4y5°y5y6y7y8                                                                          | 923.56  | 27.078  | 125675  | 2 | 462.28  | -12.49 |
| P63267 ACTH_HUMAN Actin                                    | 9  |                                                | IAPPER                       | 329 | 7  | 9  | 53.66  | y1y2y3°y3y4°y4y5y6y7                                                                                 | 795.46  | 33.657  | 55338   | 2 | 398.24  | -10.67 |
| P63267 ACTH_HUMAN Actin                                    | 10 |                                                | HQGVMTVMGMGQKDSYVGDEAQS<br>K | 40  | 22 | 6  | 25.58  | b3b8b13y7y13y22                                                                                      | 2351.05 | 58.985  | 27301   | 3 | 784.35  | -12.25 |
| P63267 ACTH_HUMAN Actin                                    | 11 |                                                | SYELPDGQVITIGNER             | 239 | 16 | 4  | 17.15  | b6y2y9y14                                                                                            | 1790.87 | 71.932  | 24055   | 3 | 597.63  | -10.22 |
| P63267 ACTH_HUMAN Actin                                    | 12 | Carbamidomethyl+C(2)                           | LCYVALDFENEMATAASSSSLEK      | 216 | 23 | 8  | 42.01  | b1b8b12y6y7y8°y8y15                                                                                  | 2536.18 | 101.262 | 6203    | 2 | 1268.59 | 7.70   |
| P63267 ACTH_HUMAN Actin                                    | 13 |                                                | DLYANNVLSGGTTMYPGIADR        | 292 | 21 | 5  | 31.17  | b3b4b6b15y15                                                                                         | 2228.02 | 88.724  | 2130    | 2 | 1114.51 | -22.13 |
| P63267 ACTH_HUMAN Actin                                    | 14 |                                                | IWHHSFYNELR                  | 85  | 11 | 5  | 24.29  | b3b9°b9y4°y4                                                                                         | 1501.72 | 80.211  | 1876    | 2 | 751.36  | -7.88  |
| P63267 ACTH_HUMAN Actin                                    | 15 | Oxidation+M()                                  | LDLAGRDLTDYLMK               | 178 | 14 | 3  | 19.27  | b4y8y10                                                                                              | 1639.83 | 89.953  | 29750   | 2 | 820.42  | -1.79  |
| P63267 ACTH_HUMAN Actin                                    | 16 |                                                | EITALAPSTMK                  | 316 | 11 | 0  | 2.43   |                                                                                                      | 1143.61 | 50.871  | 94085   | 2 | 572.31  | 2.88   |
| P04406 G3P_HUMAN Glycerlaldehyde-3-phosphate dehydrogenase | 1  |                                                | VIHDNFGIVEGLMTTVHAITATQK     | 162 | 24 | 31 | 256.24 | b3b4b5°b5b6b7°b7b8°b8°b8b9y2°y2y3y4°y4y5°y5y6y7y8y9y10y11y12y15°y15y16y21y22y24                      | 2595.36 | 103.566 | 285775  | 3 | 865.79  | 0.47   |
| P04406 G3P_HUMAN Glycerlaldehyde-3-phosphate dehydrogenase | 2  | Carbamidomethyl+C(7);<br>Carbamidomethyl+C(11) | IISNASCTTNCLAPLAK            | 145 | 17 | 30 | 210.24 | b2b10b11b12°b12b13°b13°b13b15b16°b16y2y3y4y5y6y8y9y11°y11y12°y12y13°y13°y13y14y15°y15y17°y17         | 1833.92 | 54.879  | 174643  | 2 | 917.46  | 1.46   |
| P04406 G3P_HUMAN Glycerlaldehyde-3-phosphate dehydrogenase | 3  |                                                | LISWYDNEFGYSNR               | 309 | 14 | 16 | 159.97 | b3b7°b7b13y3y4y5y6°y6y7y8y9y10y11y12y14                                                              | 1763.81 | 76.533  | 163775  | 2 | 882.41  | 3.25   |
| P04406 G3P_HUMAN Glycerlaldehyde-3-phosphate dehydrogenase | 4  |                                                | GALQNIIPASTGAAK              | 200 | 15 | 13 | 106.94 | b3b4b5°b5b7y4y7y8°y8y9y10y11y15                                                                      | 1411.79 | 60.249  | 148097  | 2 | 706.40  | -0.52  |

|                                                            |    |                                                      |                                         |     |    |    |        |                                                 |         |         |        |   |         |        |
|------------------------------------------------------------|----|------------------------------------------------------|-----------------------------------------|-----|----|----|--------|-------------------------------------------------|---------|---------|--------|---|---------|--------|
| P04406 G3P_HUMAN Glycerlaldehyde-3-phosphate dehydrogenase | 5  | Carbamidomethyl+C(13)                                | VPTANVSVVDLTCR                          | 234 | 14 | 9  | 73.38  | b7*b7y4y6y8y10y12*y12y14                        | 1530.80 | 61.793  | 127736 | 2 | 765.90  | 2.79   |
| P04406 G3P_HUMAN Glycerlaldehyde-3-phosphate dehydrogenase | 6  |                                                      | LVINGNPITIFQERDPSK                      | 66  | 18 | 7  | 40.65  | b2b3y3y14y15y16y18                              | 2041.09 | 77.927  | 103653 | 3 | 681.03  | -9.15  |
| P04406 G3P_HUMAN Glycerlaldehyde-3-phosphate dehydrogenase | 7  |                                                      | VIISAPSADAPMFVMGVNHEK                   | 118 | 21 | 15 | 102.37 | b2b3b5*b5y3y6*y6y10y11y12y14y16y18y19y21        | 2213.10 | 75.861  | 87892  | 3 | 738.37  | -4.63  |
| P04406 G3P_HUMAN Glycerlaldehyde-3-phosphate dehydrogenase | 8  |                                                      | LVINGNPITIFQER                          | 66  | 14 | 8  | 50.67  | b2b3b6y3y4y6y8y14                               | 1613.90 | 84.588  | 86121  | 2 | 807.45  | -1.21  |
| P04406 G3P_HUMAN Glycerlaldehyde-3-phosphate dehydrogenase | 9  |                                                      | VG VNGFGR                               | 5   | 8  | 10 | 54.07  | b2y1y2y4y5*y5y6y7*y7y8                          | 805.42  | 40.005  | 86105  | 2 | 403.21  | -11.67 |
| P04406 G3P_HUMAN Glycerlaldehyde-3-phosphate dehydrogenase | 10 |                                                      | VDIVAINDPFIDLNYMVYMFQYDS<br>THGK        | 27  | 28 | 19 | 148.77 | b2b3b4b5b6b8y2y5y6y7y8*y8y9y11y12y22y23y24y28   | 3308.57 | 125.684 | 28641  | 3 | 1103.53 | 2.07   |
| P04406 G3P_HUMAN Glycerlaldehyde-3-phosphate dehydrogenase | 11 |                                                      | VVDLMAHMASK                             | 323 | 11 | 10 | 36.71  | b5°b5b11y2y3y5°y7°y7y8y11                       | 1201.59 | 52.819  | 28541  | 3 | 401.20  | -13.31 |
| P04406 G3P_HUMAN Glycerlaldehyde-3-phosphate dehydrogenase | 12 |                                                      | WGDAGAEYVVESTGVFTTMEK                   | 86  | 21 | 3  | 13.86  | b14y4y7                                         | 2277.04 | 93.369  | 1641   | 2 | 1139.03 | 2.89   |
| P04406 G3P_HUMAN Glycerlaldehyde-3-phosphate dehydrogenase | 13 |                                                      | VIPELNGK                                | 219 | 8  | 4  | 40.85  | y3y5y6*y6                                       | 869.49  | 43.122  | 57964  | 2 | 435.25  | -19.44 |
| P04406 G3P_HUMAN Glycerlaldehyde-3-phosphate dehydrogenase | 14 |                                                      | VIISAPSADAPMFVMGVNHEKYD<br>NSLK         | 118 | 27 | 17 | 123.27 | b3b5°b5b20b21y6y8°y8y10y11y12y14y19y21y22y24y25 | 2933.42 | 74.880  | 130630 | 4 | 734.11  | -10.24 |
| P04406 G3P_HUMAN Glycerlaldehyde-3-phosphate dehydrogenase | 15 | Carbamidomethyl+C(20)                                | LTGMAFRVPTANVSVVDLTCR                   | 227 | 21 | 7  | 31.17  | b3°b3y5y6°y6y8y13                               | 2307.19 | 80.315  | 45170  | 3 | 769.73  | -3.70  |
| P04406 G3P_HUMAN Glycerlaldehyde-3-phosphate dehydrogenase | 16 | Carbamidomethyl+C(13)<br>;Carbamidomethyl+C(17)<br>) | YDNLKIIISNASCTTNCLAPLAK                 | 139 | 23 | 3  | 22.07  | b14b15y13                                       | 2554.27 | 83.618  | 18527  | 4 | 639.32  | 1.62   |
| P04406 G3P_HUMAN Glycerlaldehyde-3-phosphate dehydrogenase | 17 |                                                      | AAFNSGKVDIVAINDPFIDLNYMV<br>YMFQYDSTHGK | 20  | 35 | 9  | 34.52  | b3b10b20y3y5°y5y10y12y20                        | 3983.89 | 119.398 | 16313  | 4 | 996.73  | -2.76  |
| P04406 G3P_HUMAN Glycerlaldehyde-3-phosphate dehydrogenase | 18 |                                                      | AENGKLVINGNPITIFQER                     | 61  | 19 | 4  | 25.85  | b4b5b9y5                                        | 2113.12 | 123.497 | 5118   | 3 | 705.04  | -10.17 |
| P04406 G3P_HUMAN Glycerlaldehyde-3-phosphate dehydrogenase | 19 |                                                      | FHGTVKAENGK                             | 55  | 11 | 4  | 24.29  | b7b10*b10y3                                     | 1187.61 | 61.034  | 4529   | 3 | 396.54  | -3.80  |
| P04406 G3P_HUMAN Glycerlaldehyde-3-phosphate dehydrogenase | 20 |                                                      | IKWGDAGAEYVVESTGVFTTMEK                 | 84  | 23 | 3  | 23.13  | y6y8y9                                          | 2518.20 | 114.476 | 2502   | 3 | 840.07  | -5.72  |
| P04406 G3P_HUMAN Glycerlaldehyde-3-phosphate dehydrogenase | 21 |                                                      | VG VNGFGRIGR                            | 5   | 11 | 3  | 36.05  | b5b6b7                                          | 1131.62 | 115.727 | 2471   | 2 | 566.32  | -12.51 |
| P04406 G3P_HUMAN Glycerlaldehyde-3-phosphate dehydrogenase | 22 | Oxidation+M(5)                                       | VVDLMAHMASKE                            | 323 | 12 | 5  | 34.22  | b5b6b9y4°y4                                     | 1346.64 | 54.319  | 4878   | 3 | 449.55  | -0.27  |
| P04406 G3P_HUMAN Glycerlaldehyde-3-phosphate dehydrogenase | 23 |                                                      | DLMAHMASK                               | 325 | 9  | 1  | 7.86   | b8                                              | 1003.47 | 52.820  | 17281  | 2 | 502.24  | 3.04   |

|                                                           |    |                       |                           |     |    |    |        |                                                                      |         |         |        |   |         |        |
|-----------------------------------------------------------|----|-----------------------|---------------------------|-----|----|----|--------|----------------------------------------------------------------------|---------|---------|--------|---|---------|--------|
| P04406 G3P_HUMAN Glyceraldehyde-3-phosphate dehydrogenase | 24 |                       | VDLMAHMASK                | 324 | 10 | 1  | 7.86   | b8                                                                   | 1102.53 | 52.810  | 10441  | 2 | 551.77  | -6.09  |
| P04406 G3P_HUMAN Glyceraldehyde-3-phosphate dehydrogenase | 25 |                       | GVNGFGR                   | 6   | 7  | 0  | 1.21   |                                                                      | 706.36  | 40.029  | 7630   | 1 | 706.36  | -10.71 |
| P04406 G3P_HUMAN Glyceraldehyde-3-phosphate dehydrogenase | 26 |                       | GLMTTVHAITATQK            | 172 | 14 | 1  | 8.12   | b4                                                                   | 1471.78 | 103.549 | 3638   | 2 | 736.39  | -10.37 |
| P04406 G3P_HUMAN Glyceraldehyde-3-phosphate dehydrogenase | 27 |                       | LVINGNPITIFQERDPSK        | 66  | 18 | 0  | 5.26   |                                                                      | 2024.06 | 77.995  | 6499   | 2 | 1012.53 | -10.80 |
| P04406 G3P_HUMAN Glyceraldehyde-3-phosphate dehydrogenase | 28 |                       | VIHDNFGIVEGLMTTVHAITATQK  | 162 | 24 | 0  | 7.69   |                                                                      | 2577.32 | 103.582 | 3148   | 4 | 645.08  | -10.42 |
| P37802 TAGL2_HUMAN Transgelin-2                           | 1  | Carbamidomethyl+C(6)  | DGTVLCELINALYPEGQAPVKK    | 57  | 22 | 23 | 138.14 | b3°b3b4°b4b5°b5b6b11°b11°b11b22y2y4y5y7y8y9y10y13°y13y17y18y22       | 2415.25 | 105.905 | 314626 | 3 | 805.75  | -4.45  |
| P37802 TAGL2_HUMAN Transgelin-2                           | 2  |                       | YGINTTDIFQTVDLWEGK        | 102 | 18 | 22 | 180.62 | b2b3b4b7b12b13°b13b14y2y3°y3y4y5y6y9y10y12y13y14y15°y15y18           | 2100.03 | 100.937 | 209091 | 2 | 1050.52 | 1.40   |
| P37802 TAGL2_HUMAN Transgelin-2                           | 3  |                       | TLMNLGGLAVAR              | 127 | 12 | 11 | 97.75  | b2b4b5y2y4y6y7y8y9y10y12                                             | 1215.69 | 73.224  | 207349 | 2 | 608.35  | -0.30  |
| P37802 TAGL2_HUMAN Transgelin-2                           | 4  |                       | DDGLFSGDPNWFPPK           | 139 | 15 | 9  | 39.9   | b2b3°b3y1y2y3y4y7y14                                                 | 1722.79 | 76.990  | 132001 | 3 | 574.94  | -10.27 |
| P37802 TAGL2_HUMAN Transgelin-2                           | 5  |                       | IQASTMAFK                 | 79  | 9  | 11 | 74.88  | b7°b7y1y2y3y5y6y7y8°y8y9                                             | 996.51  | 46.244  | 128572 | 2 | 498.76  | -3.37  |
| P37802 TAGL2_HUMAN Transgelin-2                           | 6  |                       | DDGLFSGDPNWFPPK           | 139 | 14 | 9  | 50.67  | b2b3b13y2y6y9y10y12y14                                               | 1594.73 | 87.576  | 126611 | 2 | 797.87  | 5.43   |
| P37802 TAGL2_HUMAN Transgelin-2                           | 7  |                       | QMEQISQFLQAAER            | 88  | 14 | 21 | 153.75 | b3°b3°b3b4°b4°b4b5°b5b14y3y4y5°y5y6y7y9y10y11y12y14°y14              | 1678.83 | 80.901  | 119549 | 2 | 839.92  | 3.27   |
| P37802 TAGL2_HUMAN Transgelin-2                           | 8  | Carbamidomethyl+C(18) | QYDADLEQILIQWITTQCRK      | 20  | 20 | 16 | 123.43 | b2°b2b20y3y4y6°y6y8°y8y9y10y11y14y16y18y20                           | 2522.26 | 108.550 | 107237 | 3 | 841.42  | -4.26  |
| P37802 TAGL2_HUMAN Transgelin-2                           | 9  |                       | NFSDNQLQEGK               | 160 | 11 | 7  | 36.71  | b4y2y7y9°y9y10y11                                                    | 1279.59 | 36.694  | 103431 | 2 | 640.30  | 0.95   |
| P37802 TAGL2_HUMAN Transgelin-2                           | 10 | Carbamidomethyl+C(18) | QYDADLEQILIQWITTQCR       | 20  | 19 | 27 | 143.42 | b2°b2b6°b6°b6b8b9°b9°b9b10b12y1y2y3°y3y4°y4°y4y5y6°y6y7y8°y8y9y10y19 | 2394.17 | 115.999 | 78550  | 3 | 798.73  | -1.63  |
| P37802 TAGL2_HUMAN Transgelin-2                           | 11 |                       | GASQAGMTGYGMPR            | 182 | 14 | 10 | 86.13  | b3°b3b4b5°b5y6y7y9y10y12                                             | 1383.62 | 45.207  | 28465  | 2 | 692.31  | 1.76   |
| P37802 TAGL2_HUMAN Transgelin-2                           | 12 | Carbamidomethyl+C(6)  | DGTVLCELINALYPEGQAPVKK    | 57  | 21 | 6  | 26.72  | b3b12b14y7°y7y9                                                      | 2287.17 | 112.286 | 6385   | 2 | 1144.09 | 2.56   |
| P37802 TAGL2_HUMAN Transgelin-2                           | 13 |                       | KDVGRPQGR                 | 39  | 10 | 4  | 54.88  | y3y5y8y9                                                             | 1109.61 | 14.324  | 3699   | 3 | 370.54  | -10.67 |
| P37802 TAGL2_HUMAN Transgelin-2                           | 14 |                       | ENFQNWLK                  | 49  | 8  | 4  | 51.06  | b4b7y3y4                                                             | 1078.53 | 66.951  | 72148  | 2 | 539.77  | -2.83  |
| P37802 TAGL2_HUMAN Transgelin-2                           | 15 |                       | GPAYGLSR                  | 4   | 8  | 3  | 40.85  | y4y6y7                                                               | 820.42  | 33.575  | 41447  | 2 | 410.72  | -7.96  |
| P37802 TAGL2_HUMAN Transgelin-2                           | 16 |                       | MANR                      | 0   | 4  | 1  | 12.81  | y3                                                                   | 491.25  | 44.803  | 7969   | 1 | 491.25  | 13.48  |
| P37802 TAGL2_HUMAN Transgelin-2                           | 17 | Carbamidomethyl+C(22) | YGINTTDIFQTVDLWEGKNMACVQR | 102 | 25 | 4  | 21.94  | b10y5°y5y6                                                           | 2959.40 | 129.642 | 29406  | 3 | 987.14  | -1.48  |

|                                                                             |    |                                           |                                   |     |    |    |        |                                                                                           |         |         |        |   |         |        |
|-----------------------------------------------------------------------------|----|-------------------------------------------|-----------------------------------|-----|----|----|--------|-------------------------------------------------------------------------------------------|---------|---------|--------|---|---------|--------|
| P37802 TAGL2_HUMAN Transgelin-2                                             | 18 |                                           | ENPRNFSDNQLQEGK                   | 156 | 15 | 4  | 29.42  | b3b5b13y3                                                                                 | 1775.83 | 73.832  | 21392  | 2 | 888.42  | -2.27  |
| P37802 TAGL2_HUMAN Transgelin-2                                             | 19 | Carbamidomethyl+C(21)                     | IEKQYDADLEQILIQWITTQCR            | 17  | 22 | 7  | 65.4   | b10b11y4y5y6y8y9                                                                          | 2764.39 | 109.827 | 13373  | 3 | 922.13  | -4.33  |
| P37802 TAGL2_HUMAN Transgelin-2                                             | 20 |                                           | NVIGLQMGTNRGASQAGMTGYG<br>MPR     | 171 | 25 | 5  | 23.08  | b16y8*y8y9y14                                                                             | 2567.20 | 101.894 | 4449   | 3 | 856.40  | -10.94 |
| P37802 TAGL2_HUMAN Transgelin-2                                             | 21 |                                           | DVGRPQPQRENFNWLK                  | 40  | 17 | 3  | 16.3   | b11y8y12                                                                                  | 2041.03 | 65.820  | 1594   | 2 | 1021.02 | -1.08  |
| P37802 TAGL2_HUMAN Transgelin-2                                             | 22 | Oxidation+M(2)                            | QMEQISQFLQAAER                    | 88  | 14 | 3  | 24.71  | b9b10y7                                                                                   | 1694.83 | 97.472  | 150244 | 2 | 847.92  | 7.49   |
| P37802 TAGL2_HUMAN Transgelin-2                                             | 23 | Oxidation+M(3)                            | TLMNLGGLAVARDDGLFSGDPN<br>WFPK    | 127 | 26 | 3  | 12.13  | b12b15y9                                                                                  | 2807.39 | 98.052  | 8060   | 3 | 936.47  | 4.35   |
| P37802 TAGL2_HUMAN Transgelin-2                                             | 24 |                                           | PEGQAPVKK                         | 70  | 9  | 5  | 40.14  | b3b4b7*b7b8                                                                               | 953.53  | 105.928 | 6624   | 2 | 477.27  | -7.30  |
| Q562R1 ACTBL_HUMAN Beta-actin-like<br>protein 2                             | 1  |                                           | HQGVMMVGMGQK                      | 40  | 11 | 31 | 200.62 | b1b2*b2b3b4*b4b5b6*<br>b6b7*b7b8*b8b9b10b1<br>1y1y2*y2y3*y3y4*y4y5<br>y6y7y9*y9y10*y10y11 | 1171.57 | 33.593  | 456338 | 2 | 586.29  | -2.19  |
| Q562R1 ACTBL_HUMAN Beta-actin-like<br>protein 2                             | 2  | Carbamidomethyl+C(1)                      | CDVDIRK                           | 285 | 7  | 15 | 93.3   | b1b2*b2b3b4b6*b6y2y3<br>y4*y4y5y6*y6y7                                                    | 905.44  | 22.962  | 144435 | 2 | 453.22  | -11.39 |
| Q562R1 ACTBL_HUMAN Beta-actin-like<br>protein 2                             | 3  |                                           | IIAPPERK                          | 329 | 8  | 12 | 75.72  | b2b3y2y3*y3y4*y4y5*y5<br>y6y7y8                                                           | 923.56  | 27.078  | 125675 | 2 | 462.28  | -12.49 |
| Q562R1 ACTBL_HUMAN Beta-actin-like<br>protein 2                             | 4  |                                           | IIAPPER                           | 329 | 7  | 9  | 53.66  | y1y2y3*y3y4*y4y5y6y7                                                                      | 795.46  | 33.657  | 55338  | 2 | 398.24  | -10.67 |
| Q562R1 ACTBL_HUMAN Beta-actin-like<br>protein 2                             | 5  |                                           | SYELPDGQVITIGNER                  | 239 | 16 | 4  | 17.15  | b6y2y9y14                                                                                 | 1790.87 | 71.932  | 24055  | 3 | 597.63  | -10.22 |
| Q562R1 ACTBL_HUMAN Beta-actin-like<br>protein 2                             | 6  |                                           | YSVWIGGSILASLSTFQQMWISK           | 337 | 23 | 13 | 78.42  | b2b3b5b7b9*b9b10y2y4<br>y5y6y7*y7                                                         | 2602.34 | 136.474 | 22774  | 3 | 868.12  | -0.75  |
| Q562R1 ACTBL_HUMAN Beta-actin-like<br>protein 2                             | 7  | Carbamidomethyl+C(13)                     | HQGVMMVGMGQKDCYVVGDEAQS<br>K      | 40  | 22 | 3  | 19.94  | b9b12b14                                                                                  | 2424.08 | 52.193  | 1610   | 3 | 808.70  | 0.40   |
| Q562R1 ACTBL_HUMAN Beta-actin-like<br>protein 2                             | 8  |                                           | MTQIMFEAFNTPAMYVAIQAVLSL<br>YASGR | 119 | 29 | 5  | 24.21  | b5b14b16b19y22                                                                            | 3223.59 | 77.252  | 13768  | 3 | 1075.20 | -2.27  |
| Q562R1 ACTBL_HUMAN Beta-actin-like<br>protein 2                             | 9  |                                           | GYNFTTAER                         | 197 | 10 | 3  | 33.88  | y3y5y6                                                                                    | 1159.54 | 65.305  | 1647   | 2 | 580.27  | 2.11   |
| Q562R1 ACTBL_HUMAN Beta-actin-like<br>protein 2                             | 10 |                                           | GVLTLYKYPHGGVVTNWDDMEK            | 63  | 22 | 3  | 22.18  | b3b4y12                                                                                   | 2544.25 | 69.511  | 241592 | 3 | 848.76  | -11.71 |
| Q562R1 ACTBL_HUMAN Beta-actin-like<br>protein 2                             | 11 |                                           | DLYANTVLSGGSTMYPGIADRMQ<br>K      | 292 | 24 | 10 | 41.32  | b4b12*b12b13*b13b14y<br>10*y10y12*y12                                                     | 2588.22 | 121.691 | 16299  | 3 | 863.41  | -11.60 |
| Q562R1 ACTBL_HUMAN Beta-actin-like<br>protein 2                             | 12 |                                           | YPIEHGVVTNWDDMEKIWHYHTFY<br>NELR  | 69  | 27 | 4  | 15.32  | b5b11y8y12                                                                                | 3455.62 | 84.390  | 12490  | 3 | 1152.55 | 2.05   |
| Q562R1 ACTBL_HUMAN Beta-actin-like<br>protein 2                             | 13 |                                           | AVFPPMIGRPRHQGVMMVGMGQK           | 29  | 22 | 5  | 49.15  | b7b8y11y12y13                                                                             | 2383.20 | 97.464  | 5482   | 2 | 1192.10 | -14.03 |
| Q562R1 ACTBL_HUMAN Beta-actin-like<br>protein 2                             | 14 | Carbamidomethyl+C(18)<br>;Oxidation+M(17) | MTDNELSALVVDNGSGMCK               | 0   | 19 | 3  | 14.93  | b4b10y11                                                                                  | 2056.92 | 102.617 | 4202   | 3 | 686.31  | 10.33  |
| Q562R1 ACTBL_HUMAN Beta-actin-like<br>protein 2                             | 15 | Carbamidomethyl+C(2);<br>Oxidation+M(12)  | LCYVALDFEQEMVR                    | 216 | 14 | 4  | 30.72  | b5y4y5y11                                                                                 | 1788.81 | 99.884  | 3292   | 3 | 596.94  | -9.21  |
| Q9H299 SH3L3_HUMAN SH3 domain-<br>binding glutamic acid-rich-like protein 3 | 1  |                                           | IQYQLVDISQDNALR                   | 32  | 15 | 16 | 138.59 | b2*b2b3b4b5b12y4*y4y<br>5y6*y6y7y9y10y11y13                                               | 1775.92 | 70.518  | 109699 | 2 | 888.46  | -5.77  |
| Q9H299 SH3L3_HUMAN SH3 domain-<br>binding glutamic acid-rich-like protein 3 | 2  |                                           | VYSTSVTGSR                        | 5   | 10 | 11 | 91.51  | b2b3b4y3y4y6y8*y8y9*<br>y9y10                                                             | 1056.53 | 28.343  | 65892  | 2 | 528.77  | 0.58   |

|                                                                          |    |                       |                                       |     |    |    |        |                                                                                                          |         |         |        |   |         |        |
|--------------------------------------------------------------------------|----|-----------------------|---------------------------------------|-----|----|----|--------|----------------------------------------------------------------------------------------------------------|---------|---------|--------|---|---------|--------|
| [Q9H299]SH3L3_HUMAN SH3 domain-binding glutamic acid-rich-like protein 3 | 3  | Carbamidomethyl+C(13) | ATPPQIVNGDQYCGDYELFVEAVE<br>QNTLQEFLK | 58  | 33 | 33 | 250.03 | b2*b2b5b6b7b8*b8b9b1<br>0b11*b11b12b13y1y2y3<br>y4y5*y5*y5y6y7y8y9*y<br>9y10*y10y11*y11y12*y<br>12y13y33 | 3815.84 | 117.705 | 39179  | 3 | 1272.62 | 8.06   |
| [Q9H299]SH3L3_HUMAN SH3 domain-binding glutamic acid-rich-like protein 3 | 4  |                       | SGLR                                  | 1   | 4  | 1  | 12.81  | b3                                                                                                       | 432.26  | 62.316  | 10428  | 1 | 432.26  | 11.37  |
| [P63104]1433Z_HUMAN 14-3-3 protein zeta/delta                            | 1  | Carbamidomethyl+C(3)  | DICNDVLSLEK                           | 91  | 12 | 5  | 29.46  | b12y5y6y10y12                                                                                            | 1418.72 | 98.958  | 130594 | 2 | 709.87  | 3.10   |
| [P63104]1433Z_HUMAN 14-3-3 protein zeta/delta                            | 2  |                       | FLIPNASQAESK                          | 103 | 12 | 15 | 101.55 | b2b3b6*b6y2y3*y3y4y6<br>y7y9*y9*y9y10y12                                                                 | 1304.68 | 55.612  | 119509 | 2 | 652.85  | -0.47  |
| [P63104]1433Z_HUMAN 14-3-3 protein zeta/delta                            | 3  |                       | SVTEQGAELSNEER                        | 27  | 14 | 18 | 112.55 | b5*b5b10b12*b12y2y4°<br>y4y5y7y9y10*y10*y10y<br>11*y11y12y14                                             | 1548.72 | 35.250  | 110090 | 2 | 774.86  | 1.50   |
| [P63104]1433Z_HUMAN 14-3-3 protein zeta/delta                            | 4  |                       | GIVDQSQQAYQEAFEISKK                   | 139 | 19 | 7  | 39.08  | b3b12y3y4y14y16y19                                                                                       | 2169.07 | 68.565  | 102595 | 3 | 723.70  | -4.39  |
| [P63104]1433Z_HUMAN 14-3-3 protein zeta/delta                            | 5  |                       | TAFDEAIAELDTLSEESYKDSTLIM<br>QLLR     | 193 | 29 | 25 | 186.87 | b2b3b4b5b6b7°b7b8°b8<br>b15b26y2y3y4*y4y5y6y<br>7y10y21y22y23y24y26y<br>29                               | 3302.61 | 136.652 | 78828  | 4 | 826.41  | -7.76  |
| [P63104]1433Z_HUMAN 14-3-3 protein zeta/delta                            | 6  | Carbamidomethyl+C(7)  | YDDMAACMK                             | 18  | 9  | 8  | 74.88  | b2b3y3y4y5y7y8y9                                                                                         | 1104.42 | 39.504  | 57377  | 2 | 552.71  | 2.98   |
| [P63104]1433Z_HUMAN 14-3-3 protein zeta/delta                            | 7  |                       | YLAEVAAGDDKK                          | 127 | 12 | 6  | 68.9   | y3y5y7y8y10y12                                                                                           | 1279.64 | 33.403  | 44840  | 3 | 427.22  | -9.25  |
| [P63104]1433Z_HUMAN 14-3-3 protein zeta/delta                            | 8  |                       | GIVDQSQQAYQEAFEISK                    | 139 | 18 | 6  | 29.13  | b13b14°b14y9y11y18                                                                                       | 2041.01 | 72.665  | 43137  | 2 | 1021.01 | 11.42  |
| [P63104]1433Z_HUMAN 14-3-3 protein zeta/delta                            | 9  |                       | TAFDEAIAELDTLSEESYK                   | 193 | 19 | 9  | 42.54  | b2°b2b9b12b13y9°y9y1<br>0y12                                                                             | 2132.00 | 101.763 | 19956  | 2 | 1066.50 | 4.81   |
| [P63104]1433Z_HUMAN 14-3-3 protein zeta/delta                            | 10 |                       | IETELR                                | 85  | 6  | 1  | 13.62  | y5                                                                                                       | 760.41  | 31.435  | 17693  | 2 | 380.71  | -10.03 |
| [P63104]1433Z_HUMAN 14-3-3 protein zeta/delta                            | 11 |                       | DSTLIMQLLR                            | 212 | 10 | 3  | 26.89  | b3y3y5                                                                                                   | 1189.64 | 92.763  | 3603   | 1 | 1189.64 | -16.52 |
| [P63104]1433Z_HUMAN 14-3-3 protein zeta/delta                            | 12 |                       | VFYLK                                 | 115 | 5  | 1  | 13.21  | y4                                                                                                       | 669.39  | 29.846  | 2241   | 2 | 335.20  | -11.85 |
| [P63104]1433Z_HUMAN 14-3-3 protein zeta/delta                            | 13 |                       | GIVDQSQQAYQEAFEISKK                   | 139 | 19 | 4  | 21.88  | b9°b9b11b15                                                                                              | 2169.05 | 87.272  | 5776   | 2 | 1085.03 | -14.86 |
| [P63104]1433Z_HUMAN 14-3-3 protein zeta/delta                            | 14 |                       | GDYYRYLAEVAAGDDK                      | 122 | 16 | 4  | 23.68  | b11y5y6°y6                                                                                               | 1805.82 | 82.093  | 3243   | 2 | 903.41  | -7.91  |
| [P63104]1433Z_HUMAN 14-3-3 protein zeta/delta                            | 15 |                       | YLAEVAAGDDKK                          | 127 | 12 | 4  | 22.26  | b3b9y9°y9                                                                                                | 1279.65 | 64.871  | 2682   | 2 | 640.33  | -5.34  |
| [P63104]1433Z_HUMAN 14-3-3 protein zeta/delta                            | 16 | Carbamidomethyl+C(3)  | DICNDVLSLEKFLIPNASQAESK               | 91  | 24 | 7  | 16.85  | b9b12*b12y5y8*y8*y8                                                                                      | 2704.40 | 115.853 | 1814   | 2 | 1352.70 | 5.42   |
| [P02042]HBD_HUMAN Hemoglobin subunit delta                               | 1  |                       | LLVVYPWTQR                            | 31  |    | 18 | 116.17 | b2b3b4b5y1y2*y2y3*y3<br>y4y5°y5*y5y6°y6y7y8y1<br>0                                                       | 1274.72 | 79.048  | 653049 | 2 | 637.86  | -4.88  |
| [P02042]HBD_HUMAN Hemoglobin subunit delta                               | 2  |                       | VVAGVANALAHK                          | 133 | 12 | 12 | 95.33  | b1b2y2y3y4y5y6*y6y7y<br>9y10y12                                                                          | 1149.67 | 42.683  | 111240 | 2 | 575.34  | -4.57  |
| [P02042]HBD_HUMAN Hemoglobin subunit delta                               | 3  |                       | LHVDPENFR                             | 96  | 9  | 7  | 67.68  | b3b8y3*y3y5y7y9                                                                                          | 1126.57 | 47.479  | 51881  | 2 | 563.79  | 0.98   |
| [P02042]HBD_HUMAN Hemoglobin subunit delta                               | 4  |                       | EFTPQMAAYQK                           | 121 | 12 | 5  | 34.22  | b4b10b11y9y12                                                                                            | 1441.68 | 47.790  | 8324   | 2 | 721.34  | -1.27  |
| [P02042]HBD_HUMAN Hemoglobin subunit delta                               | 5  |                       | VLGAFSDGLAHLDNLK                      | 67  | 16 | 10 | 106.94 | b3y3y4y5y6y7y9y12°y1<br>2y14                                                                             | 1669.86 | 76.920  | 356514 | 3 | 557.29  | -16.23 |
| [P02042]HBD_HUMAN Hemoglobin subunit delta                               | 6  |                       | VHLTPEEK                              | 1   | 8  | 3  | 36.08  | b6y4y6                                                                                                   | 952.50  | 26.737  | 85823  | 2 | 476.76  | -6.09  |

|                                                        |    |                       |                                     |     |    |    |        |                                                                  |         |         |        |   |         |        |
|--------------------------------------------------------|----|-----------------------|-------------------------------------|-----|----|----|--------|------------------------------------------------------------------|---------|---------|--------|---|---------|--------|
| P02042 HBD_HUMAN Hemoglobin subunit delta              | 7  |                       | VVAGVANALAHKYH                      | 133 | 14 | 11 | 118.29 | b3b5y3y4y5y6y7y9*y9y11y12                                        | 1449.80 | 46.131  | 41440  | 2 | 725.40  | 0.42   |
| P19105 MRLC3_HUMAN Myosin regulatory light chain MRLC3 | 1  |                       | ATSNVFAMFDQSQIQEFK                  | 16  | 18 | 7  | 24.8   | b5*b5y2y4y10y14y18                                               | 2091.00 | 90.205  | 78805  | 2 | 1046.00 | 7.12   |
| P19105 MRLC3_HUMAN Myosin regulatory light chain MRLC3 | 2  |                       | LNGTDPEDVIR                         | 92  | 11 | 13 | 87.14  | b5*b5y1y3y4y5*y5y6y7y8y9*y11*y11                                 | 1228.62 | 49.031  | 76391  | 2 | 614.81  | 0.70   |
| P19105 MRLC3_HUMAN Myosin regulatory light chain MRLC3 | 3  |                       | GNFNIEFTR                           | 150 | 10 | 13 | 120.94 | b2*b2b3b5b6b9y4*y4y5y6y7y8y10                                    | 1260.60 | 67.247  | 67920  | 2 | 630.80  | -2.03  |
| P19105 MRLC3_HUMAN Myosin regulatory light chain MRLC3 | 4  |                       | ELLTTMGDR                           | 123 | 9  | 6  | 54.47  | b9y3y5y6y7y9                                                     | 1035.51 | 49.154  | 23517  | 2 | 518.26  | -1.53  |
| P19105 MRLC3_HUMAN Myosin regulatory light chain MRLC3 | 5  |                       | EAFNMIDQNRDGFIDK                    | 34  | 16 | 5  | 35.05  | b3*b3b9b14b15                                                    | 1912.87 | 54.323  | 254332 | 4 | 478.97  | -10.21 |
| P19105 MRLC3_HUMAN Myosin regulatory light chain MRLC3 | 6  |                       | RPQRATSNVFAMFDQSQIQEFK              | 12  | 22 | 4  | 23.3   | y12y14*y14y15                                                    | 2628.31 | 80.237  | 2578   | 3 | 876.77  | 3.16   |
| P19105 MRLC3_HUMAN Myosin regulatory light chain MRLC3 | 7  |                       | ELLTTMGDRFTDEEVDELYR                | 123 | 20 | 4  | 19.74  | b9b14y5y14                                                       | 2432.10 | 88.638  | 1773   | 2 | 1216.55 | -10.94 |
| P19105 MRLC3_HUMAN Myosin regulatory light chain MRLC3 | 8  | Oxidation+M()         | ATSNVFAMFDQSQIQEFKEAFNMI DQNR       | 16  | 28 | 5  | 22.31  | b13y7y8y10*y10                                                   | 3325.51 | 98.874  | 4904   | 4 | 832.13  | -4.85  |
| P19105 MRLC3_HUMAN Myosin regulatory light chain MRLC3 | 9  | Oxidation+M()         | ATSNVFAMFDQSQIQEFKEAFNMI DQNRDGFIDK | 16  | 34 | 6  | 40.13  | b4b5b8b9y5y10                                                    | 4000.83 | 48.176  | 4801   | 5 | 800.97  | -3.42  |
| O14950 MRLC2_HUMAN Myosin regulatory light chain MRLC2 | 1  |                       | ATSNVFAMFDQSQIQEFK                  | 17  | 18 | 7  | 24.8   | b5*b5y2y4y10y14y18                                               | 2091.00 | 90.205  | 78805  | 2 | 1046.00 | 7.12   |
| O14950 MRLC2_HUMAN Myosin regulatory light chain MRLC2 | 2  |                       | LNGTDPEDVIR                         | 93  | 11 | 13 | 87.14  | b5*b5y1y3y4y5*y5y6y7y8y9*y11*y11                                 | 1228.62 | 49.031  | 76391  | 2 | 614.81  | 0.70   |
| O14950 MRLC2_HUMAN Myosin regulatory light chain MRLC2 | 3  |                       | GNFNIEFTR                           | 151 | 10 | 13 | 120.94 | b2*b2b3b5b6b9y4*y4y5y6y7y8y10                                    | 1260.60 | 67.247  | 67920  | 2 | 630.80  | -2.03  |
| O14950 MRLC2_HUMAN Myosin regulatory light chain MRLC2 | 4  |                       | ELLTTMGDR                           | 124 | 9  | 6  | 54.47  | b9y3y5y6y7y9                                                     | 1035.51 | 49.154  | 23517  | 2 | 518.26  | -1.53  |
| O14950 MRLC2_HUMAN Myosin regulatory light chain MRLC2 | 5  |                       | MSSK                                | 0   | 4  | 2  | 12.81  | b3*b3                                                            | 452.22  | 22.027  | 4111   | 1 | 452.22  | 5.20   |
| P68366 TBA4A_HUMAN Tubulin alpha-4A chain              | 1  |                       | VGINYQPPTVVPGDLAK                   | 352 | 18 | 15 | 94.35  | b5*b5b6b7b8b10b11*b11y1y2y3y7y8y12y18                            | 1824.99 | 65.865  | 221198 | 2 | 913.00  | 1.54   |
| P68366 TBA4A_HUMAN Tubulin alpha-4A chain              | 2  |                       | AVFVDLEPTVIDEIR                     | 64  | 15 | 25 | 217.88 | b2b4b5*b5b6b7b10*b10b11b12y2y3*y3y4*y4y5y7y8y9*y9y10y11y12y13y15 | 1715.92 | 89.164  | 169421 | 2 | 858.47  | 1.28   |
| P68366 TBA4A_HUMAN Tubulin alpha-4A chain              | 3  | Carbamidomethyl+C(8)  | SIQFVDWCPTGFK                       | 339 | 13 | 18 | 183.45 | b2b3b4b5b6*b6b10*b10b12y3y4y6y7y8y9y10y12y13                     | 1584.75 | 82.921  | 137137 | 2 | 792.88  | 1.93   |
| P68366 TBA4A_HUMAN Tubulin alpha-4A chain              | 4  |                       | NLDIERPTYTNLNR                      | 215 | 14 | 18 | 81.07  | b2*b2b3b5*b5*b5b11*y2y3y4*y4y6y7y8*y8y12y14*y14                  | 1718.86 | 52.848  | 136360 | 3 | 573.63  | -11.29 |
| P68366 TBA4A_HUMAN Tubulin alpha-4A chain              | 5  |                       | EIIDPVLDR                           | 112 | 9  | 5  | 38.25  | b2y5y6y7y9                                                       | 1069.58 | 59.959  | 94250  | 2 | 535.29  | -5.93  |
| P68366 TBA4A_HUMAN Tubulin alpha-4A chain              | 6  |                       | LISQIVSSITASLR                      | 229 | 14 | 9  | 86.51  | b4*b4b5y3y4y5y8y9y12                                             | 1487.88 | 100.837 | 88935  | 2 | 744.44  | 2.05   |
| P68366 TBA4A_HUMAN Tubulin alpha-4A chain              | 7  | Carbamidomethyl+C(15) | AYHEQLSVAEITNACFEPANQMV K           | 280 | 24 | 7  | 39.61  | b3b7b9b10y7y9y11                                                 | 2750.30 | 73.543  | 69795  | 3 | 917.44  | 4.70   |
| P68366 TBA4A_HUMAN Tubulin alpha-4A chain              | 8  |                       | EDMAALEK                            | 422 | 8  | 7  | 49.3   | b2b4*b4y3y4y5y8                                                  | 906.42  | 36.781  | 55448  | 2 | 453.71  | -4.85  |
| P68366 TBA4A_HUMAN Tubulin alpha-4A chain              | 9  |                       | FDGALNVDLTEFQTNLVPYPR               | 243 | 21 | 10 | 44.02  | b2b3b5b17y2y4y5y12y14y21                                         | 2409.23 | 94.898  | 47635  | 2 | 1205.12 | 8.92   |
| P68366 TBA4A_HUMAN Tubulin alpha-4A chain              | 10 |                       | LSVDYGKK                            | 156 | 8  | 8  | 67.28  | b2y3y4y5y6*y6y7y8                                                | 909.50  | 29.926  | 30988  | 2 | 455.25  | -5.50  |
| P68366 TBA4A_HUMAN Tubulin alpha-4A chain              | 11 |                       | QLFHPEQLITGK                        | 84  | 12 | 4  | 29.46  | b4*b4b8b9                                                        | 1410.77 | 65.072  | 93393  | 2 | 705.89  | -3.81  |

|                                            |    |                       |                                     |      |    |    |        |                                                                                                                              |         |         |        |   |         |        |
|--------------------------------------------|----|-----------------------|-------------------------------------|------|----|----|--------|------------------------------------------------------------------------------------------------------------------------------|---------|---------|--------|---|---------|--------|
| IP68366 TBA4A_HUMAN Tubulin alpha-4A chain | 12 | Carbamidomethyl+C(14) | TIGGGDDSFSTFFCETGAGK                | 40   | 20 | 13 | 71.4   | b5b11b14°b14b18y3y6°y6y9°y9y11°y11y13                                                                                        | 2067.92 | 81.420  | 49183  | 2 | 1034.46 | 9.80   |
| IP68366 TBA4A_HUMAN Tubulin alpha-4A chain | 13 | Carbamidomethyl+C(5)  | LSDQCTGLQGFLVFHSPGGTGS<br>GFTSLLMER | 124  | 32 | 14 | 70.85  | b4*b4b6b10b11b13b14<br>*b14b16b24y4°y4y5y10                                                                                  | 3406.63 | 105.193 | 9987   | 3 | 1136.22 | 4.30   |
| IP68366 TBA4A_HUMAN Tubulin alpha-4A chain | 14 |                       | NGPYRQLFHPEQLITGK                   | 79   | 17 | 6  | 39.13  | b5b10b12°b2b12b14y8                                                                                                          | 1998.03 | 61.388  | 95538  | 2 | 999.52  | -11.61 |
| IP68366 TBA4A_HUMAN Tubulin alpha-4A chain | 15 | Carbamidomethyl+C(9)  | RSIQFVDWCPTGFK                      | 338  | 14 | 5  | 27.05  | y5°y5y8y9°y9                                                                                                                 | 1740.86 | 52.847  | 3362   | 3 | 580.96  | 5.68   |
| IP68366 TBA4A_HUMAN Tubulin alpha-4A chain | 16 |                       | EDAANNYARGHYTIGK                    | 96   | 16 | 3  | 24.85  | b9b11b15                                                                                                                     | 1779.86 | 62.815  | 1890   | 2 | 890.43  | 7.96   |
| IP68366 TBA4A_HUMAN Tubulin alpha-4A chain | 17 |                       | SVDYGKK                             | 157  | 7  | 0  | 1.21   |                                                                                                                              | 796.41  | 29.862  | 13417  | 2 | 398.71  | -9.35  |
| IP68366 TBA4A_HUMAN Tubulin alpha-4A chain | 18 |                       | DMAALEK                             | 423  | 7  | 1  | 9.66   | b4                                                                                                                           | 777.37  | 36.816  | 3336   | 1 | 777.37  | -10.68 |
| IP68366 TBA4A_HUMAN Tubulin alpha-4A chain | 19 |                       | EIIDPVLDR                           | 112  | 9  | 0  | 1.62   |                                                                                                                              | 1051.57 | 59.971  | 4661   | 2 | 526.29  | -4.53  |
| IP18206 VINC_HUMAN Vinculin                | 1  |                       | TIESILEPVAQQISHLVIMHEEGEV<br>DGK    | 7    | 28 | 38 | 242.77 | b1°b1b2°b2b3°b3b4°b4<br>b5°b5b6°b6y1y2y3°y3y4<br>y6°y6y7y8y9y10y11y12<br>°y12y13y15y19y21*y21<br>y22*y22y23y25y26°y26<br>y28 | 3101.55 | 110.910 | 273986 | 4 | 776.14  | -10.47 |
| IP18206 VINC_HUMAN Vinculin                | 2  |                       | LTDELAPPKPLPEGEVPPPRPPPP<br>EEK     | 853  | 28 | 4  | 26.82  | y6y11y12y22                                                                                                                  | 3023.58 | 60.901  | 200657 | 4 | 756.65  | -10.42 |
| IP18206 VINC_HUMAN Vinculin                | 3  |                       | AVAGNISDPGLQK                       | 802  | 13 | 13 | 135.57 | b2b6b9b12y3y5y6y7y8y<br>9y10y11y13                                                                                           | 1269.67 | 40.691  | 143830 | 2 | 635.34  | -4.52  |
| IP18206 VINC_HUMAN Vinculin                | 4  |                       | AQQVSQGLDVLTAQ                      | 352  | 14 | 18 | 107.2  | b2*b2b3*b3b4*b4b5°b5<br>b9y2y3y4y8y10y11y12*<br>y12y14                                                                       | 1457.79 | 58.265  | 132977 | 2 | 729.40  | -0.84  |
| IP18206 VINC_HUMAN Vinculin                | 5  |                       | AIPDLTAPVAAVQAAVSNLVR               | 35   | 21 | 23 | 160.25 | b2b4°b4b5b6b7°b7b16y<br>2y3y4*y4y5*y5y6y7y8*<br>y8y14y15y16y19y21                                                            | 2076.19 | 118.304 | 130389 | 2 | 1038.60 | 5.76   |
| IP18206 VINC_HUMAN Vinculin                | 6  |                       | TNISDEESEQATEMLVHNAQNLM<br>QSVK     | 1076 | 27 | 18 | 76.62  | b1b2°b2°b2b3b5°b5b6y<br>1y4*y4y5y15y21y22y24<br>y25y27                                                                       | 3046.42 | 96.494  | 105452 | 3 | 1016.15 | 4.17   |
| IP18206 VINC_HUMAN Vinculin                | 7  |                       | VMLVNSMNTVK                         | 188  | 11 | 9  | 36.71  | b2b6°b6y2y7y9y10y11*<br>y11                                                                                                  | 1235.65 | 55.099  | 97558  | 2 | 618.33  | -2.96  |
| IP18206 VINC_HUMAN Vinculin                | 8  |                       | QVATALQNLQTK                        | 464  | 12 | 19 | 86.87  | b2*b2b3*b3b12y1y2y3°<br>y3*y3y4y5y6*y9y10°y1<br>0*y10y11y12                                                                  | 1314.74 | 48.893  | 96553  | 2 | 657.87  | -1.11  |
| IP18206 VINC_HUMAN Vinculin                | 9  |                       | VAMANIQPQLVAGATSIAR                 | 738  | 20 | 21 | 161.5  | b1b3b4b5°b5b8b9°b9b<br>10y1y2y3y4y5y7y8y11y<br>13y14y15y20                                                                   | 2042.10 | 84.267  | 95843  | 2 | 1021.55 | 5.62   |
| IP18206 VINC_HUMAN Vinculin                | 10 |                       | ELLPVLISAMK                         | 199  | 11 | 9  | 52.93  | b2°b2b3y4y5°y5y6y8y1<br>1                                                                                                    | 1213.72 | 91.501  | 90501  | 2 | 607.36  | -4.32  |
| IP18206 VINC_HUMAN Vinculin                | 11 |                       | ELTPQVVSAAR                         | 669  | 11 | 10 | 87.14  | b2b10y4y5y6y7y8*y8y9<br>y11                                                                                                  | 1170.65 | 46.178  | 87700  | 2 | 585.83  | -0.42  |
| IP18206 VINC_HUMAN Vinculin                | 12 |                       | LVQAAQMLQSDPYSVPAR                  | 87   | 18 | 22 | 160.29 | b1b2b7°b7b11b15°b15y<br>1y3y4y5y6y7y9°y9y10y<br>11*y11y12y13y14y18                                                           | 1974.02 | 66.065  | 77265  | 2 | 987.51  | 3.71   |
| IP18206 VINC_HUMAN Vinculin                | 13 |                       | MTGLVDEAIDTK                        | 708  | 12 | 12 | 83.56  | b2°b2b4b11y2y3y5y7°y<br>7y10y11y12                                                                                           | 1292.64 | 57.823  | 77105  | 2 | 646.82  | -1.23  |

|                             |    |                       |                          |      |    |    |        |                                                                                                                         |         |         |        |   |         |        |
|-----------------------------|----|-----------------------|--------------------------|------|----|----|--------|-------------------------------------------------------------------------------------------------------------------------|---------|---------|--------|---|---------|--------|
| IP18206 VINC_HUMAN Vinculin | 14 |                       | LLAVAATAPPDAPNR          | 607  | 15 | 9  | 52.33  | b2y2y4y7y8y10y11 <sup>°</sup> y11y15                                                                                    | 1476.82 | 51.303  | 76833  | 2 | 738.92  | 4.71   |
| IP18206 VINC_HUMAN Vinculin | 15 |                       | STVEGIQASVK              | 655  | 11 | 11 | 68.49  | b2 <sup>°</sup> b2y1y3y4y5 <sup>°</sup> y5y7 <sup>°</sup> y7y9y11                                                       | 1118.60 | 40.305  | 75802  | 2 | 559.80  | -7.20  |
| IP18206 VINC_HUMAN Vinculin | 16 |                       | WIDNPVDDR                | 502  | 10 | 7  | 39.31  | b3b8y2y6 <sup>°</sup> y6y8y10                                                                                           | 1230.58 | 48.410  | 74122  | 2 | 615.79  | 0.89   |
| IP18206 VINC_HUMAN Vinculin | 17 |                       | ALASQLQDSLK              | 570  | 11 | 5  | 36.05  | b2y3y6y9y11                                                                                                             | 1173.65 | 54.857  | 73275  | 2 | 587.33  | -1.98  |
| IP18206 VINC_HUMAN Vinculin | 18 |                       | VLQLTSWDEDAWASK          | 246  | 15 | 9  | 55.55  | b5 <sup>°</sup> b5y5y6y8y11 <sup>°</sup> y11y12y15                                                                      | 1748.85 | 79.728  | 70135  | 2 | 874.93  | 1.26   |
| IP18206 VINC_HUMAN Vinculin | 19 |                       | GWLRDPSASPGDAGEQAIR      | 281  | 19 | 10 | 50.01  | b2b5b8b9 <sup>°</sup> b9y1y3y6y9y10                                                                                     | 1982.96 | 53.916  | 69486  | 3 | 661.66  | -5.60  |
| IP18206 VINC_HUMAN Vinculin | 20 |                       | MALLMAEMSR               | 993  | 10 | 6  | 41.07  | b2b3b5y6y7y10                                                                                                           | 1152.56 | 72.797  | 63376  | 2 | 576.78  | 0.32   |
| IP18206 VINC_HUMAN Vinculin | 21 |                       | ALASQLQDSLKDLK           | 570  | 14 | 5  | 27.84  | y2y3y6y12y14                                                                                                            | 1529.83 | 67.244  | 61060  | 3 | 510.62  | -13.25 |
| IP18206 VINC_HUMAN Vinculin | 22 |                       | MQEAMTQEVSDVFSDTTPIK     | 586  | 21 | 5  | 13.86  | b13y2y3y9y21                                                                                                            | 2358.09 | 80.724  | 60120  | 2 | 1179.55 | 3.83   |
| IP18206 VINC_HUMAN Vinculin | 23 |                       | AGEVINQPMMAAR            | 889  | 14 | 21 | 194.06 | b3b4 <sup>°</sup> b4b5b6b7 <sup>°</sup> b7 <sup>°</sup> b7b10 <sup>°</sup> b10b13 <sup>°</sup> b13y3y4y5y6y7y9y10y11y14 | 1518.73 | 58.893  | 58886  | 2 | 759.87  | 2.49   |
| IP18206 VINC_HUMAN Vinculin | 24 |                       | ETVQTTEDQILKR            | 59   | 13 | 14 | 92.72  | b2 <sup>°</sup> b2y1y2y3y4y5y7y8y9 <sup>°</sup> y9y10 <sup>°</sup> y10y13                                               | 1560.81 | 47.240  | 52374  | 3 | 520.94  | -9.54  |
| IP18206 VINC_HUMAN Vinculin | 25 |                       | LLAVAATAPPDAPNREEVFDER   | 607  | 22 | 9  | 42.76  | b2b3y1y2y3y7y11y14y16                                                                                                   | 2381.20 | 62.142  | 47687  | 3 | 794.40  | -4.72  |
| IP18206 VINC_HUMAN Vinculin | 26 |                       | NPGNQAAAYEHFETMK         | 684  | 15 | 4  | 25.77  | b3b6y8y14                                                                                                               | 1736.76 | 47.329  | 42019  | 3 | 579.59  | -7.87  |
| IP18206 VINC_HUMAN Vinculin | 27 |                       | NQWIDNVEK                | 699  | 9  | 8  | 30.47  | b1b4y5y7 <sup>°</sup> y7 <sup>°</sup> y9 <sup>°</sup> y9                                                                | 1145.56 | 50.189  | 39485  | 2 | 573.28  | -1.81  |
| IP18206 VINC_HUMAN Vinculin | 28 |                       | DYLDGSR                  | 105  | 8  | 6  | 49.3   | b3b6 <sup>°</sup> b6b7y6y8                                                                                              | 938.45  | 46.084  | 36652  | 2 | 469.73  | -3.38  |
| IP18206 VINC_HUMAN Vinculin | 29 |                       | GQGSSPVAMQK              | 341  | 11 | 17 | 101.14 | b2 <sup>°</sup> b2b7 <sup>°</sup> b7 <sup>°</sup> b7b8 <sup>°</sup> b8y1y3y4y6 <sup>°</sup> y6y7y8y9 <sup>°</sup> y9y11 | 1089.53 | 26.903  | 34044  | 2 | 545.27  | -5.49  |
| IP18206 VINC_HUMAN Vinculin | 30 | Carbamidomethyl+C(7)  | TNLLQVCER                | 1046 | 9  | 5  | 30.47  | b5y1y6y7y9                                                                                                              | 1132.58 | 51.190  | 30230  | 2 | 566.80  | 5.71   |
| IP18206 VINC_HUMAN Vinculin | 31 |                       | DPSASPGDAGEQAIR          | 285  | 15 | 11 | 88.96  | b10y2y3y7 <sup>°</sup> y7y10y11y12y13y14y15                                                                             | 1470.68 | 35.586  | 19412  | 2 | 735.85  | 1.58   |
| IP18206 VINC_HUMAN Vinculin | 32 |                       | GILEYLTVAEVVETMEDLVITYTK | 139  | 23 | 6  | 28.79  | b3b6b12b17y2y23                                                                                                         | 2616.33 | 136.894 | 6836   | 3 | 872.78  | -1.87  |
| IP18206 VINC_HUMAN Vinculin | 33 |                       | QQLTHQEHR                | 178  | 10 | 7  | 51.87  | y2y3 <sup>°</sup> y3y4 <sup>°</sup> y4y5y6                                                                              | 1305.61 | 14.556  | 6675   | 3 | 435.88  | -11.87 |
| IP18206 VINC_HUMAN Vinculin | 34 |                       | NQIEEALK                 | 219  | 9  | 4  | 30.47  | b7b8y5y9                                                                                                                | 1001.53 | 42.125  | 6288   | 1 | 1001.53 | 0.49   |
| IP18206 VINC_HUMAN Vinculin | 35 |                       | GNDIIAAAK                | 983  | 9  | 7  | 53.22  | b2b4b6 <sup>°</sup> b6 <sup>°</sup> b6b8y4                                                                              | 872.48  | 26.972  | 4557   | 2 | 436.74  | -8.11  |
| IP18206 VINC_HUMAN Vinculin | 36 |                       | GVGQA AIR                | 512  | 8  | 4  | 54.07  | b3b5y4y6                                                                                                                | 771.45  | 26.205  | 4260   | 2 | 386.23  | 0.32   |
| IP18206 VINC_HUMAN Vinculin | 37 |                       | IPTISTQLK                | 1055 | 9  | 3  | 38.25  | y5y7y8                                                                                                                  | 1000.60 | 52.802  | 63520  | 2 | 500.80  | -5.37  |
| IP18206 VINC_HUMAN Vinculin | 38 |                       | GILSGTSDLLTFDEAEVR       | 113  | 19 | 5  | 46.17  | y6y7y11y12y15                                                                                                           | 2036.06 | 100.666 | 22534  | 2 | 1018.53 | 2.16   |
| IP18206 VINC_HUMAN Vinculin | 39 |                       | EAFQPQEPDFPPPPDLEQLR     | 832  | 21 | 3  | 13.86  | b4b13y8                                                                                                                 | 2447.22 | 78.654  | 17741  | 3 | 816.41  | 11.37  |
| IP18206 VINC_HUMAN Vinculin | 40 |                       | SFLDSGYR                 | 815  | 8  | 4  | 40.85  | y3y4y6 <sup>°</sup> y6                                                                                                  | 944.47  | 52.206  | 15188  | 1 | 944.47  | 20.55  |
| IP18206 VINC_HUMAN Vinculin | 41 |                       | DDILR                    | 428  | 5  | 1  | 13.21  | y4                                                                                                                      | 631.34  | 59.538  | 9909   | 1 | 631.34  | -3.87  |
| IP18206 VINC_HUMAN Vinculin | 42 |                       | LNQAK                    | 276  | 5  | 1  | 13.21  | b3                                                                                                                      | 573.34  | 89.809  | 8504   | 1 | 573.34  | 4.47   |
| IP18206 VINC_HUMAN Vinculin | 43 | Carbamidomethyl+C(6)  | EILGTCK                  | 319  | 7  | 3  | 40.45  | b6y3y5                                                                                                                  | 820.42  | 31.109  | 6333   | 2 | 410.72  | 0.67   |
| IP18206 VINC_HUMAN Vinculin | 44 |                       | LEAMTNSK                 | 373  | 8  | 3  | 40.85  | y3y6y7                                                                                                                  | 893.43  | 123.987 | 3161   | 1 | 893.43  | -12.50 |
| IP18206 VINC_HUMAN Vinculin | 45 |                       | IDAAQNWLADPNNGPEGEEQIR   | 387  | 22 | 5  | 24.21  | b9b10b13 <sup>°</sup> b13y12                                                                                            | 2380.10 | 100.716 | 1820   | 3 | 794.04  | -6.56  |
| IP18206 VINC_HUMAN Vinculin | 46 |                       | LANVMMGPYRQDLLAK         | 528  | 16 | 8  | 81.96  | b3b4b7b9b10b11b12y11                                                                                                    | 1819.98 | 116.614 | 416352 | 3 | 607.33  | 12.48  |
| IP18206 VINC_HUMAN Vinculin | 47 |                       | DIAKASDEVTR              | 1020 | 11 | 6  | 55.94  | b3y5y6y7 <sup>°</sup> y7y8                                                                                              | 1204.62 | 68.160  | 314478 | 2 | 602.81  | 4.05   |
| IP18206 VINC_HUMAN Vinculin | 48 |                       | AQQVSQGLDVLTAKVENAAR     | 352  | 20 | 4  | 19.74  | b4b6y5y14                                                                                                               | 2098.14 | 118.298 | 148338 | 3 | 700.05  | 9.43   |
| IP18206 VINC_HUMAN Vinculin | 49 | Carbamidomethyl+C(13) | DMPPAFIKVENACTK          | 72   | 15 | 6  | 41.46  | y4 <sup>°</sup> y4y7y10 <sup>°</sup> y10y12                                                                             | 1720.86 | 63.031  | 111304 | 4 | 430.97  | 9.72   |



|                              |    |                                                |                                       |      |    |    |        |                                                                                                                                                     |         |         |        |   |         |        |
|------------------------------|----|------------------------------------------------|---------------------------------------|------|----|----|--------|-----------------------------------------------------------------------------------------------------------------------------------------------------|---------|---------|--------|---|---------|--------|
| P18206 VINC_HUMAN Vinculin   | 50 |                                                | KIDAAQNWLADPNGGPEGEEQIR               | 386  | 23 | 12 | 61.84  | b7b11b14b15*b15y4y6*<br>y6y10y12*y12y14                                                                                                             | 2508.20 | 62.315  | 87342  | 3 | 836.74  | -4.87  |
| P18206 VINC_HUMAN Vinculin   | 51 |                                                | GWLDRDPSASPGDAGEQAIR                  | 281  | 19 | 3  | 14.93  | b10b12y13                                                                                                                                           | 1982.99 | 55.639  | 21124  | 3 | 661.67  | 11.08  |
| P18206 VINC_HUMAN Vinculin   | 52 |                                                | EVENSEDPKFR                           | 769  | 11 | 6  | 70.92  | b3y3y4y5y8y9                                                                                                                                        | 1349.62 | 29.782  | 13535  | 3 | 450.54  | -13.11 |
| P18206 VINC_HUMAN Vinculin   | 53 |                                                | MTGLVDEAIDTKSLLDASEEAIK               | 708  | 23 | 4  | 20.11  | b10y3y5y20                                                                                                                                          | 2449.22 | 70.471  | 8086   | 3 | 817.08  | -7.68  |
| P18206 VINC_HUMAN Vinculin   | 54 |                                                | RMALLMAEMSR                           | 992  | 11 | 3  | 31.28  | b7b9b10                                                                                                                                             | 1308.67 | 83.024  | 7965   | 2 | 654.84  | 9.33   |
| P18206 VINC_HUMAN Vinculin   | 55 |                                                | ATMLGRTNISDEESEQATEMLVH<br>NAQNLMQSVK | 1070 | 33 | 4  | 22.85  | b11b12*b12b26                                                                                                                                       | 3675.77 | 85.416  | 7214   | 4 | 919.70  | 7.77   |
| P18206 VINC_HUMAN Vinculin   | 56 |                                                | EAVKAASDELK                           | 780  | 12 | 6  | 49.66  | b3b4b9b11y7y7                                                                                                                                       | 1247.64 | 58.951  | 5896   | 3 | 416.55  | -6.46  |
| P18206 VINC_HUMAN Vinculin   | 57 |                                                | REVENSEDPK                            | 768  | 10 | 4  | 26.89  | b4b6y6*y6                                                                                                                                           | 1202.55 | 69.022  | 3382   | 2 | 601.78  | -12.99 |
| P18206 VINC_HUMAN Vinculin   | 58 |                                                | WIDNPTVDDRGVGQAAIR                    | 502  | 18 | 8  | 40.65  | b7b14*b14b15*b15*b15<br>b16y16                                                                                                                      | 1983.00 | 99.930  | 3348   | 3 | 661.67  | 0.25   |
| P18206 VINC_HUMAN Vinculin   | 59 |                                                | AGEVINQPMMAARQLHDEAR                  | 889  | 21 | 3  | 13.86  | b13y8y14                                                                                                                                            | 2368.11 | 106.443 | 1870   | 3 | 790.04  | -11.03 |
| P18206 VINC_HUMAN Vinculin   | 60 | Carbamidomethyl+C(6)                           | EILGTCKMLGQMTDQVADLR                  | 319  | 20 | 4  | 36.03  | b16y9y10y11                                                                                                                                         | 2279.15 | 106.439 | 1818   | 3 | 760.39  | 13.71  |
| P18206 VINC_HUMAN Vinculin   | 61 | Carbamidomethyl+C(2)                           | VCKGILEYLTVAEVTMEDLVT<br>YTK          | 136  | 26 | 5  | 22.79  | b8*b8y4y7y8                                                                                                                                         | 3003.54 | 137.599 | 1785   | 3 | 1001.85 | 3.50   |
| P18206 VINC_HUMAN Vinculin   | 62 |                                                | GEGESQARALASQLQDSLK                   | 561  | 20 | 3  | 23.78  | b10b11b14                                                                                                                                           | 2085.04 | 97.360  | 1521   | 3 | 695.68  | -10.42 |
| P18206 VINC_HUMAN Vinculin   | 63 |                                                | QGGKDSPEAR                            | 450  | 10 | 4  | 26.89  | b5*b5b9y9                                                                                                                                           | 1044.51 | 101.936 | 1502   | 1 | 1044.51 | -0.35  |
| P18206 VINC_HUMAN Vinculin   | 64 | Oxidation+M(19)                                | TIESILEPVAQQISHLVIMHEEGEV<br>DGK      | 7    | 28 | 3  | 17.71  | y4y12y22                                                                                                                                            | 3117.53 | 107.622 | 20776  | 4 | 780.14  | -14.49 |
| P18206 VINC_HUMAN Vinculin   | 65 | Oxidation+M(20)                                | VLQLTSWDEDAWASKDTEAMK                 | 246  | 21 | 3  | 22.32  | b11b12y12                                                                                                                                           | 2440.16 | 62.347  | 3345   | 4 | 610.80  | 11.91  |
| P18206 VINC_HUMAN Vinculin   | 66 | Oxidation+M(9)                                 | GQGSSPVAMQK                           | 341  | 11 | 4  | 27.3   | b7b8y5*y5                                                                                                                                           | 1105.52 | 66.781  | 3335   | 1 | 1105.52 | -13.03 |
| P18206 VINC_HUMAN Vinculin   | 67 |                                                | NQAAYEHFETMK                          | 687  | 12 | 1  | 7.26   | b5                                                                                                                                                  | 1468.67 | 47.294  | 5120   | 2 | 734.84  | 14.38  |
| P18206 VINC_HUMAN Vinculin   | 68 |                                                | PPDAPNR                               | 615  | 7  | 0  | 4.05   |                                                                                                                                                     | 766.38  | 51.329  | 4500   | 2 | 383.70  | 0.80   |
| P18206 VINC_HUMAN Vinculin   | 69 |                                                | PSASPGDAGEQAIR                        | 286  | 14 | 2  | 7.26   | b13*b13                                                                                                                                             | 1355.64 | 35.534  | 2857   | 3 | 452.55  | -12.25 |
| P18206 VINC_HUMAN Vinculin   | 70 |                                                | ESILEPVAQQISHLVIMHEEGEVDG<br>K        | 9    | 26 | 7  | 33.47  | b4b5*b5b7*b7b10b13                                                                                                                                  | 2887.47 | 110.908 | 1659   | 3 | 963.16  | 4.99   |
| P18206 VINC_HUMAN Vinculin   | 71 |                                                | ETVQTTEDQILKR                         | 59   | 13 | 0  | 3.24   |                                                                                                                                                     | 1543.81 | 47.213  | 22130  | 3 | 515.27  | 11.70  |
| P18206 VINC_HUMAN Vinculin   | 72 |                                                | ELLPVLISAMK                           | 199  | 11 | 0  | 2.43   |                                                                                                                                                     | 1195.71 | 91.528  | 3702   | 2 | 598.36  | 0.51   |
| P08567 PLEK_HUMAN Pleckstrin | 1  |                                                | EDPAYLHYYPDAGAEDPLGAIHLR              | 269  | 24 | 28 | 187.58 | b2*b2b4*b4b5*b5b7*b7<br>b8b10*b10b11*b11b15b<br>16y1y2y3y5y6y7y8y9y1<br>0y12y14y22y24                                                               | 2683.24 | 79.661  | 494433 | 4 | 671.57  | -13.56 |
| P08567 PLEK_HUMAN Pleckstrin | 2  |                                                | SEEEENLFEIITADEVHYFLQAATPK            | 308  | 25 | 44 | 321.92 | b1b2*b2b3*b3b4*b4b5*<br>b5b6*b6*b6b7*b7b9b10<br>b11y2y3*y3y4*y4y5y7y<br>8y10y11*y11y12y13*y1<br>3y14y15*y15y16y18*y1<br>8y19*y19y20y21y22y23<br>y25 | 2894.41 | 122.269 | 302338 | 3 | 965.47  | -0.84  |
| P08567 PLEK_HUMAN Pleckstrin | 3  | Carbamidomethyl+C(5);<br>Carbamidomethyl+C(10) | IFNHCFGTGNCVIDWLVSNQSVR               | 150  | 22 | 7  | 34.99  | b5b13y4y6y7y10y22                                                                                                                                   | 2666.29 | 92.296  | 138534 | 3 | 889.44  | 11.90  |
| P08567 PLEK_HUMAN Pleckstrin | 4  |                                                | QQDHFQAAFLER                          | 75   | 14 | 13 | 68.65  | b3*b3b7*b7b14y2y3*y3<br>y6y9y10y12y14                                                                                                               | 1765.82 | 72.033  | 96309  | 3 | 589.28  | -6.77  |
| P08567 PLEK_HUMAN Pleckstrin | 5  |                                                | QEGLMIASSLLNEGYLQPDGMS<br>K           | 174  | 24 | 20 | 71.1   | b4*b4b5*b5*b5b6*b6b1<br>3b15*b15*b15y1y2y7y1<br>0*y10y11y13y17y24                                                                                   | 2552.23 | 91.479  | 78138  | 3 | 851.41  | -3.64  |
| P08567 PLEK_HUMAN Pleckstrin | 6  | Carbamidomethyl+C(8)                           | GSTLTSPQDFGKR                         | 51   | 14 | 9  | 72.13  | y2y3y4y7*y7y8y9y10y1<br>4                                                                                                                           | 1553.75 | 41.941  | 32867  | 2 | 777.38  | 4.79   |

|                                                         |    |                       |                             |     |    |    |        |                                                      |         |         |        |   |         |        |
|---------------------------------------------------------|----|-----------------------|-----------------------------|-----|----|----|--------|------------------------------------------------------|---------|---------|--------|---|---------|--------|
| P08567 PLEK_HUMAN Pleckstrin                            | 7  | Carbamidomethyl+C(2)  | GCVVTVSVESNSNGRK            | 293 | 15 | 11 | 68.76  | b2b3y3y4y8*y8y10*y10y11y12y15                        | 1593.74 | 29.992  | 19677  | 3 | 531.92  | -13.25 |
| P08567 PLEK_HUMAN Pleckstrin                            | 8  |                       | LPETIDLGALYLSMKDTEK         | 119 | 19 | 6  | 28.46  | b13b14y1y5y8*y8                                      | 2137.09 | 88.629  | 18291  | 3 | 713.04  | -8.23  |
| P08567 PLEK_HUMAN Pleckstrin                            | 9  |                       | GSVFNTWKPMVWVLEDGIEFYK      | 14  | 23 | 9  | 28.22  | b2b3*b3b7y1y2y3y4y8                                  | 2758.39 | 125.306 | 9798   | 3 | 920.14  | -1.42  |
| P08567 PLEK_HUMAN Pleckstrin                            | 10 | Carbamidomethyl+C(2)  | GCVVTVSVESNSNGR             | 293 | 14 | 6  | 39.8   | b3b6b13b14y8y10                                      | 1465.69 | 50.847  | 3430   | 2 | 733.35  | 10.74  |
| P08567 PLEK_HUMAN Pleckstrin                            | 11 |                       | QQDHFFQAAFLERDAWVR          | 75  | 19 | 3  | 14.93  | b9y5y7                                               | 2393.12 | 102.558 | 2014   | 3 | 798.38  | -7.96  |
| P08567 PLEK_HUMAN Pleckstrin                            | 12 | Carbamidomethyl+C(8)  | GSTLTSPCQDFGK               | 51  | 13 | 3  | 20.63  | b12y9y12                                             | 1397.66 | 62.440  | 67165  | 3 | 466.56  | 16.86  |
| P08567 PLEK_HUMAN Pleckstrin                            | 13 |                       | LPETIDLGALYLSMK             | 119 | 15 | 5  | 52.33  | y3y4y10y11y13                                        | 1663.90 | 95.493  | 50045  | 2 | 832.45  | -0.07  |
| P08567 PLEK_HUMAN Pleckstrin                            | 14 |                       | NRQEGLMIASSLLNEGYPAGDMSK    | 172 | 26 | 7  | 45.11  | b7b19y3y11y12y13y21                                  | 2822.39 | 86.436  | 69105  | 3 | 941.47  | 1.82   |
| P08567 PLEK_HUMAN Pleckstrin                            | 15 |                       | KSEEEENFEIITADEVHYFLQAATPK  | 307 | 26 | 3  | 12.13  | b7y6y13                                              | 3022.50 | 116.435 | 62830  | 3 | 1008.17 | -1.29  |
| P08567 PLEK_HUMAN Pleckstrin                            | 16 |                       | SEEEENFEIITADEVHYFLQAATPKER | 308 | 27 | 4  | 17.77  | b3b11b13y12                                          | 3179.51 | 94.363  | 4877   | 3 | 1060.51 | -13.97 |
| P08567 PLEK_HUMAN Pleckstrin                            | 17 | Carbamidomethyl+C(2)  | GCVVTVSVESNSNGRK            | 293 | 15 | 3  | 18.12  | b3b5y6                                               | 1593.78 | 78.590  | 2494   | 3 | 531.93  | 11.80  |
| P08567 PLEK_HUMAN Pleckstrin                            | 18 | Carbamidomethyl+C(8)  | GSTLTSPCQDFGKR              | 51  | 14 | 3  | 19.27  | b7y10y12                                             | 1553.72 | 78.732  | 1824   | 2 | 777.36  | -13.36 |
| P08567 PLEK_HUMAN Pleckstrin                            | 19 | Phosphoryl STY(13)    | LPETIDLGALYLSMKDTEK         | 119 | 19 | 4  | 14.93  | b14*b14y3y5                                          | 2217.09 | 94.317  | 1728   | 2 | 1109.05 | 11.45  |
| P08567 PLEK_HUMAN Pleckstrin                            | 20 | Oxidation+M(22)       | QEGLMIASSLLNEGYPAGDMSK      | 174 | 24 | 7  | 28.37  | b4b7b10*b10b14y14*y14                                | 2568.23 | 88.565  | 13567  | 3 | 856.75  | 0.10   |
| P08567 PLEK_HUMAN Pleckstrin                            | 21 | Carbamidomethyl+C(6)  | TLTSPCQDFGKR                | 53  | 12 | 1  | 7.31   | b7                                                   | 1409.69 | 42.021  | 4610   | 3 | 470.57  | 5.80   |
| P08567 PLEK_HUMAN Pleckstrin                            | 22 | Carbamidomethyl+C(4)  | TSPCQDFGKR                  | 55  | 10 | 0  | 3.64   |                                                      | 1195.56 | 41.914  | 4529   | 2 | 598.29  | 9.60   |
| P08567 PLEK_HUMAN Pleckstrin                            | 23 |                       | QQDHFFQAAFLER               | 75  | 14 | 0  | 3.64   |                                                      | 1747.80 | 72.018  | 1533   | 3 | 583.27  | -7.96  |
| P68363 TBA1B_HUMAN Tubulin alpha-1B chain               | 1  |                       | AVFVDLEPTVIDEVR             | 64  | 15 | 21 | 201.65 | b3b4b5b6b7b13b14y2y3y4*y4y5*y5y8y9*y9y10y11y12y13y15 | 1701.91 | 84.492  | 273928 | 2 | 851.46  | 3.37   |
| P68363 TBA1B_HUMAN Tubulin alpha-1B chain               | 2  |                       | VGINYQPPTVVPGLDLAK          | 352 | 18 | 15 | 94.35  | b5*b5b6b7b8b10b11*b11y1y2y3y7y8y12y18                | 1824.99 | 65.865  | 221198 | 2 | 913.00  | 1.54   |
| P68363 TBA1B_HUMAN Tubulin alpha-1B chain               | 3  | Carbamidomethyl+C(8)  | SIQFVDWCPTGFK               | 339 | 13 | 18 | 183.45 | b2b3b4b5b6*b6b10*b10b12y3y4y6y7y8y9y10y12y13         | 1584.75 | 82.921  | 137137 | 2 | 792.88  | 1.93   |
| P68363 TBA1B_HUMAN Tubulin alpha-1B chain               | 4  |                       | NLDIERPTYTNLNR              | 215 | 14 | 18 | 81.07  | b2*b2b3b5*b5*b5b11*y2y3y4*y4y6y7y8*y8y12y14*y14      | 1718.86 | 52.848  | 136360 | 3 | 573.63  | -11.29 |
| P68363 TBA1B_HUMAN Tubulin alpha-1B chain               | 5  |                       | LISQIVSSITASLR              | 229 | 14 | 9  | 86.51  | b4*b4b5y3y4y5y8y9y12                                 | 1487.88 | 100.837 | 88935  | 2 | 744.44  | 2.05   |
| P68363 TBA1B_HUMAN Tubulin alpha-1B chain               | 6  |                       | EIIDLVDR                    | 112 | 9  | 8  | 61.66  | b2b3y1y3y4y5y6y9                                     | 1085.62 | 79.694  | 76890  | 2 | 543.31  | -4.39  |
| P68363 TBA1B_HUMAN Tubulin alpha-1B chain               | 7  | Carbamidomethyl+C(15) | AYHEQLSVAEITNACFEPANQMVK    | 280 | 24 | 7  | 39.61  | b3b7b9b10y7y9y11                                     | 2750.30 | 73.543  | 69795  | 3 | 917.44  | 4.70   |
| P68363 TBA1B_HUMAN Tubulin alpha-1B chain               | 8  |                       | EDMAALEK                    | 422 | 8  | 7  | 49.3   | b2b4*b4y3y4y5y8                                      | 906.42  | 36.781  | 55448  | 2 | 453.71  | -4.85  |
| P68363 TBA1B_HUMAN Tubulin alpha-1B chain               | 9  |                       | FDGALNVDLTEFQTNLVPYPR       | 243 | 21 | 10 | 44.02  | b2b3b5b17y2y4y5y12y14y21                             | 2409.23 | 94.898  | 47635  | 2 | 1205.12 | 8.92   |
| P68363 TBA1B_HUMAN Tubulin alpha-1B chain               | 10 |                       | LSVDYGKK                    | 156 | 8  | 8  | 67.28  | b2y3y4y5y6*y6y7y8                                    | 909.50  | 29.926  | 30988  | 2 | 455.25  | -5.50  |
| P24844 MYL9_HUMAN Myosin regulatory light polypeptide 9 | 1  |                       | ATSNVFAMFDQSQIQEFK          | 17  | 18 | 7  | 24.8   | b5*b5y2y4y10y14y18                                   | 2091.00 | 90.205  | 78805  | 2 | 1046.00 | 7.12   |
| P24844 MYL9_HUMAN Myosin regulatory light polypeptide 9 | 2  |                       | LNGTDPEDVIR                 | 93  | 11 | 13 | 87.14  | b5*b5y1y3y4y5*y5y6y7y8y9*y11*y11                     | 1228.62 | 49.031  | 76391  | 2 | 614.81  | 0.70   |

|                                                          |    |                      |                                  |      |    |    |        |                                                                                                         |         |         |        |   |         |        |
|----------------------------------------------------------|----|----------------------|----------------------------------|------|----|----|--------|---------------------------------------------------------------------------------------------------------|---------|---------|--------|---|---------|--------|
| [P24844]MYL9_HUMAN Myosin regulatory light polypeptide 9 | 3  |                      | ELLTTMGDR                        | 124  | 9  | 6  | 54.47  | b9y3y5y6y7y9                                                                                            | 1035.51 | 49.154  | 23517  | 2 | 518.26  | -1.53  |
| [P24844]MYL9_HUMAN Myosin regulatory light polypeptide 9 | 4  |                      | EAFNMIDQNRDGFIDK                 | 35   | 16 | 3  | 17.15  | b11b13y6                                                                                                | 1912.89 | 60.283  | 9663   | 3 | 638.30  | 4.08   |
| [P24844]MYL9_HUMAN Myosin regulatory light polypeptide 9 | 5  | Carbamidomethyl+C(5) | NAFACFDEEASGFIHEDHLR             | 104  | 20 | 6  | 39.17  | b14y4y5y6y9y9                                                                                           | 2364.99 | 81.374  | 21555  | 4 | 592.00  | -17.55 |
| [P24844]MYL9_HUMAN Myosin regulatory light polypeptide 9 | 6  |                      | FTDEEVDEMYR                      | 133  | 11 | 4  | 47.5   | y3y4y5y8                                                                                                | 1433.62 | 54.242  | 16954  | 2 | 717.31  | 19.93  |
| [P24844]MYL9_HUMAN Myosin regulatory light polypeptide 9 | 7  | Phosphoryl STY(10)   | FTDEEVDEMYR                      | 133  | 11 | 7  | 69.95  | b8b9y3_H3PO4<br>y3y4_H3PO4<br>y4y5_H3PO4 y5y6y6                                                         | 1513.55 | 18.187  | 4240   | 2 | 757.28  | 4.52   |
| [P24844]MYL9_HUMAN Myosin regulatory light polypeptide 9 | 8  | Oxidation+M()        | EAFNMIDQNRDGFIDKEDLHDML<br>ASLGK | 35   | 28 | 6  | 50.04  | y8y8y9y11y12y13                                                                                         | 3238.52 | 100.136 | 8150   | 3 | 1080.18 | 2.04   |
| [P24844]MYL9_HUMAN Myosin regulatory light polypeptide 9 | 9  | Oxidation+M(9)       | FTDEEVDEMYR                      | 133  | 11 | 4  | 24.29  | b6y4y4y8                                                                                                | 1449.58 | 26.014  | 2339   | 2 | 725.29  | -1.60  |
| [P35579]MYH9_HUMAN Myosin-9                              | 1  |                      | LQQLDDLLVLDLHQQR                 | 1417 | 16 | 23 | 153.97 | b2*b2b6*b6b12b14*b1<br>4y1y3*y3y4y5y6y7*y7y<br>8y10*y10y11y12y14*y1<br>4y16                             | 1949.98 | 85.973  | 324902 | 3 | 650.66  | -8.01  |
| [P35579]MYH9_HUMAN Myosin-9                              | 2  |                      | IAEFTTNLTEEEK                    | 1000 | 14 | 15 | 118.29 | b2b10b13b14y4y6y7<br>y8y10y11y12*y12y13y1<br>4                                                          | 1653.78 | 57.538  | 301736 | 2 | 827.40  | -0.37  |
| [P35579]MYH9_HUMAN Myosin-9                              | 3  |                      | IMGIPEEQMGLLR                    | 327  | 14 | 7  | 45.24  | b2b3b4y6y10y12y14                                                                                       | 1615.82 | 78.218  | 259808 | 2 | 808.41  | 2.12   |
| [P35579]MYH9_HUMAN Myosin-9                              | 4  |                      | IIGLDQVAGMSETALPGAFK             | 617  | 20 | 16 | 115.43 | b2b3b5b7b15b20y2y3y4<br>y5y6y7y8y13y16y20                                                               | 2018.07 | 90.189  | 256314 | 2 | 1009.54 | 2.90   |
| [P35579]MYH9_HUMAN Myosin-9                              | 5  |                      | QLLQANPILEAFGNAK                 | 209  | 16 | 32 | 198.08 | b2*b2b3*b3b4*b4b5*b<br>5b6*b6b12b15b16y1y2y<br>4*y4y5y6y7*y7*y7y8y1<br>0*y10y11y12y13*y13y1<br>4*y14y16 | 1726.95 | 91.473  | 248530 | 2 | 863.98  | -1.63  |
| [P35579]MYH9_HUMAN Myosin-9                              | 6  |                      | IAQLEEEEEEQGNTELINDR             | 1730 | 21 | 21 | 134.02 | b3b11*b11*b11b12*b12<br>b15b18*b18y2y3*y3y4y<br>5y6y7y8y10y12y16y21                                     | 2472.17 | 71.015  | 206213 | 3 | 824.73  | -0.40  |
| [P35579]MYH9_HUMAN Myosin-9                              | 7  |                      | IAQLEEQLDNETK                    | 1815 | 13 | 17 | 167.23 | b3b4b5b6b9b11*b11b1<br>2y5*y5y6y7y9y10*y10y<br>11y13                                                    | 1530.77 | 51.894  | 193818 | 2 | 765.89  | 3.99   |
| [P35579]MYH9_HUMAN Myosin-9                              | 8  |                      | DFSALESQLQDTQELLQEENR            | 1301 | 21 | 17 | 84.39  | b2b3*b3b4*b4y3*y3y4*y<br>4y5*y5*y5y6y8y11y15y<br>21                                                     | 2493.17 | 91.884  | 183408 | 3 | 831.73  | -2.84  |
| [P35579]MYH9_HUMAN Myosin-9                              | 9  |                      | LDPHLVLDQLR                      | 682  | 11 | 8  | 81.71  | b1y3y4y5y6y7y9y11                                                                                       | 1318.74 | 71.455  | 181095 | 2 | 659.88  | -2.68  |
| [P35579]MYH9_HUMAN Myosin-9                              | 10 |                      | LTEMETLQSQLMAEK                  | 867  | 15 | 16 | 123.16 | b3b7b12b14*b14y1y3y4<br>y7y9y11*y11y12y12y1<br>3y15                                                     | 1751.86 | 73.704  | 156726 | 2 | 876.43  | 3.07   |
| [P35579]MYH9_HUMAN Myosin-9                              | 11 |                      | LQVELDNVTGLLSQSDSK               | 1277 | 18 | 18 | 96.77  | b2*b2b3b4b6y2y2y4*y<br>4y6*y6y12y13y14y15y1<br>6*y16y18                                                 | 1946.02 | 81.328  | 154550 | 2 | 973.51  | 5.27   |
| [P35579]MYH9_HUMAN Myosin-9                              | 12 |                      | DELADEIANSSGK                    | 1703 | 13 | 21 | 172    | b2*b2b3b4b7b9b12y1y2<br>y3y4y5*y5y6y8*y8y9y1<br>0*y10y11y13                                             | 1348.63 | 49.981  | 144663 | 2 | 674.82  | 2.53   |

|                            |    |                       |                                |      |    |    |        |                                                                                  |         |        |        |   |         |        |
|----------------------------|----|-----------------------|--------------------------------|------|----|----|--------|----------------------------------------------------------------------------------|---------|--------|--------|---|---------|--------|
| P35579 MYH9_HUMAN Myosin-9 | 13 |                       | ANLQIDQINTDLNLER               | 1754 | 16 | 21 | 123.77 | b2*b2b3*b3b4*b4b7*b7<br>b12b15y3y4y5y6*y6y8y<br>11*y11y12*y12y16                 | 1869.97 | 72.495 | 138864 | 2 | 935.49  | 3.85   |
| P35579 MYH9_HUMAN Myosin-9 | 14 | Carbamidomethyl+C(9)  | VEDMAELTCLNEASVLHNLK           | 82   | 20 | 8  | 33.43  | b2b3y1y4y10y13y18y20                                                             | 2286.10 | 80.061 | 131555 | 3 | 762.70  | -5.55  |
| P35579 MYH9_HUMAN Myosin-9 | 15 |                       | EEILAQAK                       | 1661 | 8  | 10 | 62.51  | b6°b6y1y2y3*y3y4y5y6<br>y8                                                       | 901.49  | 35.442 | 128940 | 2 | 451.25  | -6.91  |
| P35579 MYH9_HUMAN Myosin-9 | 16 |                       | TQLEELEDELQATEDAK              | 1538 | 17 | 24 | 172.26 | b2*b2b5b6b9b10b11*b<br>11b12°b12*b12b13*b13<br>b14y2y4y5y6y9y13*y13<br>y14y15y17 | 1961.93 | 79.205 | 128856 | 2 | 981.47  | 5.60   |
| P35579 MYH9_HUMAN Myosin-9 | 17 |                       | VEAQLQELQVK                    | 1249 | 11 | 12 | 63.93  | b1b2b4b9y2y3*y3y7y8y<br>9*y9y11                                                  | 1284.71 | 53.533 | 128451 | 2 | 642.86  | -6.65  |
| P35579 MYH9_HUMAN Myosin-9 | 18 |                       | LQEMEGTVK                      | 1793 | 9  | 10 | 80.9   | y2y3y4y5y6y7y8°y8*y8<br>y9                                                       | 1034.52 | 33.023 | 127448 | 2 | 517.76  | -1.18  |
| P35579 MYH9_HUMAN Myosin-9 | 19 |                       | ALEQQVEEMK                     | 1528 | 10 | 19 | 70.51  | b1b2b3b8°b8b10y1y2y4<br>°y4y6°y6*y6y7°y7*y7y8<br>*y8y10                          | 1204.59 | 46.164 | 127026 | 2 | 602.80  | -0.71  |
| P35579 MYH9_HUMAN Myosin-9 | 20 |                       | ELESQISELQEDLESER              | 1107 | 17 | 18 | 121.62 | b2b3b5°b5b6°b6*b6b12<br>y3y4y5y6y8*y8y10y11y<br>14y17                            | 2033.96 | 79.792 | 126224 | 2 | 1017.49 | 6.48   |
| P35579 MYH9_HUMAN Myosin-9 | 21 |                       | ASITALEAK                      | 1806 | 9  | 6  | 38.25  | b1y2y5y6y8y9                                                                     | 903.51  | 42.629 | 116549 | 2 | 452.26  | -9.39  |
| P35579 MYH9_HUMAN Myosin-9 | 22 |                       | EEVGEEAIVELVENGKK              | 47   | 17 | 11 | 81.99  | b2°b2b8y4y5y8y9y10y1<br>4y15y17                                                  | 1871.94 | 75.934 | 116060 | 3 | 624.65  | -10.56 |
| P35579 MYH9_HUMAN Myosin-9 | 23 |                       | YEILTPNSIPK                    | 720  | 11 | 6  | 35.28  | b2b3b9y6y9y11                                                                    | 1274.70 | 62.781 | 113232 | 2 | 637.85  | 1.15   |
| P35579 MYH9_HUMAN Myosin-9 | 24 |                       | LEVNLQAMK                      | 1557 | 9  | 7  | 54.47  | b2y3y6y7*y7y8y9                                                                  | 1045.57 | 58.360 | 103742 | 2 | 523.29  | -5.37  |
| P35579 MYH9_HUMAN Myosin-9 | 25 |                       | MQQNIQELEELEEESAR              | 940  | 19 | 21 | 148.56 | b2*b2b5*b5b6b7b8b12<br>y2y3y4°y4y5y7y8y12*y<br>12y14y15y17y19                    | 2333.07 | 75.390 | 98076  | 2 | 1167.04 | 5.34   |
| P35579 MYH9_HUMAN Myosin-9 | 26 |                       | QLEEAEEEAQR                    | 1877 | 11 | 14 | 100.35 | b7b11y3y4y5*y5y6*y6y<br>7y8*y8y9°y9y11                                           | 1331.60 | 30.119 | 98046  | 2 | 666.31  | -2.29  |
| P35579 MYH9_HUMAN Myosin-9 | 27 |                       | VVFQEFR                        | 711  | 7  | 10 | 63.86  | b6y1y2y3y4°y4*y4y5y6<br>y7                                                       | 924.48  | 56.082 | 92448  | 2 | 462.75  | -9.57  |
| P35579 MYH9_HUMAN Myosin-9 | 28 |                       | ELEDATETADAMNR                 | 1898 | 14 | 10 | 109.35 | y2y3y4y6y7y9y10y11y1<br>2y14                                                     | 1565.68 | 43.639 | 90356  | 2 | 783.34  | 3.20   |
| P35579 MYH9_HUMAN Myosin-9 | 29 | Carbamidomethyl+C(13) | LEEEQIILEDQNCK                 | 975  | 14 | 12 | 122.17 | b3b6b7b8b9y4y5y7y8y9<br>y12y14                                                   | 1760.84 | 55.312 | 88853  | 2 | 880.92  | 2.63   |
| P35579 MYH9_HUMAN Myosin-9 | 30 |                       | FLSNGHVTIPGQQDKDMFQETME<br>AMR | 301  | 26 | 11 | 63.97  | b6°b6y2y3y4y5y6°y6y7<br>y13y26                                                   | 3010.39 | 77.319 | 87508  | 4 | 753.35  | 2.03   |
| P35579 MYH9_HUMAN Myosin-9 | 31 |                       | DLEGLSQR                       | 1392 | 8  | 8  | 51.06  | b4b5°b5y1y3y5y8*y8                                                               | 917.46  | 39.868 | 87342  | 2 | 459.24  | -5.52  |
| P35579 MYH9_HUMAN Myosin-9 | 32 |                       | ALEEAMEQK                      | 1483 | 9  | 6  | 61.66  | b7y2y5y6y7y8                                                                     | 1048.50 | 34.083 | 87060  | 2 | 524.75  | -1.51  |
| P35579 MYH9_HUMAN Myosin-9 | 33 |                       | TEMEDLMSSKDDVVK                | 1503 | 15 | 10 | 87.7   | b3b10b13y3y8y9y11y12<br>y13y15                                                   | 1684.73 | 51.595 | 82546  | 3 | 562.25  | -4.78  |
| P35579 MYH9_HUMAN Myosin-9 | 34 |                       | NFINNPLAQADWAAK                | 14   | 15 | 7  | 29.42  | b2b3y6y8y10*y10y15                                                               | 1672.85 | 78.595 | 79415  | 2 | 836.93  | 3.58   |
| P35579 MYH9_HUMAN Myosin-9 | 35 |                       | ALELDSNLYR                     | 745  | 10 | 9  | 54.29  | b2b8b9y2y4y5°y5y8y10                                                             | 1193.61 | 60.236 | 78184  | 2 | 597.31  | -2.35  |
| P35579 MYH9_HUMAN Myosin-9 | 36 |                       | QIATLHAQVADMK                  | 1357 | 13 | 11 | 95.73  | y1y2y3y4y6*y6y7y8y10<br>y11y13                                                   | 1425.74 | 47.076 | 74059  | 3 | 475.92  | -5.91  |
| P35579 MYH9_HUMAN Myosin-9 | 37 |                       | KEEELQAALAR                    | 1080 | 11 | 19 | 129.79 | b2°b2b3°b3b4b6°b6b8y<br>1y4y5y7y8y9°y9y10°y1<br>0y11*y11                         | 1257.67 | 43.025 | 73666  | 2 | 629.34  | -4.66  |
| P35579 MYH9_HUMAN Myosin-9 | 38 |                       | DLGEELEALK                     | 1135 | 10 | 5  | 47.89  | b3b7°b7b9y3                                                                      | 1116.58 | 72.867 | 63039  | 2 | 558.79  | -0.77  |
| P35579 MYH9_HUMAN Myosin-9 | 39 |                       | AGVLAHLEEEER                   | 764  | 11 | 6  | 50.51  | y2y3y4y5y6y11                                                                    | 1223.63 | 50.165 | 59868  | 2 | 612.32  | -5.79  |

|                            |    |                       |                          |      |    |    |        |                                                             |         |         |        |   |         |        |
|----------------------------|----|-----------------------|--------------------------|------|----|----|--------|-------------------------------------------------------------|---------|---------|--------|---|---------|--------|
| P35579 MYH9_HUMAN Myosin-9 | 40 |                       | SMEAEMIQLQEELAAER        | 1676 | 18 | 23 | 188.4  | b2b3b5b12b13*b13b14b15y1y2y3y4y5*y5y6y7y8y9*y9y10y11*y11y12 | 2048.95 | 94.257  | 55509  | 3 | 683.66  | -5.24  |
| P35579 MYH9_HUMAN Myosin-9 | 41 | Carbamidomethyl+C(7)  | MEDSVGCLETAEEVKR         | 1372 | 16 | 10 | 81.96  | b2b3y3y4y6*y6y7y8y9y11                                      | 1852.83 | 48.911  | 52454  | 3 | 618.28  | -7.18  |
| P35579 MYH9_HUMAN Myosin-9 | 42 |                       | NTDQASMPDNTAAQK          | 358  | 15 | 9  | 55.34  | b2b15y3y8*y8y9y10y11y15                                     | 1591.70 | 27.066  | 51228  | 2 | 796.35  | 0.08   |
| P35579 MYH9_HUMAN Myosin-9 | 43 | Carbamidomethyl+C(1)  | CNGVLEGIR                | 693  | 9  | 7  | 54.47  | b2*b2y3y4y5y7y9                                             | 1017.51 | 49.140  | 45436  | 2 | 509.26  | -2.88  |
| P35579 MYH9_HUMAN Myosin-9 | 44 | Carbamidomethyl+C(7)  | MEDSVGCLETAEEVK          | 1372 | 15 | 4  | 26.21  | y8y10y13y15                                                 | 1696.75 | 54.056  | 39528  | 2 | 848.88  | 6.48   |
| P35579 MYH9_HUMAN Myosin-9 | 45 |                       | EELQAALAR                | 1081 | 10 | 6  | 40.11  | b6y3y5y6y10*y10                                             | 1129.58 | 49.841  | 39172  | 2 | 565.30  | -0.32  |
| P35579 MYH9_HUMAN Myosin-9 | 46 |                       | NLPYSEEIVEMYK            | 125  | 14 | 6  | 39     | b3b4b7y9y12y14                                              | 1727.86 | 82.298  | 33581  | 2 | 864.44  | 4.24   |
| P35579 MYH9_HUMAN Myosin-9 | 47 |                       | THEAQIQEMR               | 1181 | 10 | 16 | 88.49  | b2*b2b3*b3b4y2y4*y4y5y6*y6y7*y7y8*y8y10                     | 1242.59 | 29.527  | 32992  | 2 | 621.80  | -0.69  |
| P35579 MYH9_HUMAN Myosin-9 | 48 |                       | IRELESQISELQEDLESER      | 1105 | 19 | 5  | 31.57  | b4b5b7b14y19                                                | 2303.15 | 80.070  | 30977  | 2 | 1152.08 | 6.89   |
| P35579 MYH9_HUMAN Myosin-9 | 49 |                       | LEGDSTDLSDQIAELQAQIAELK  | 1052 | 23 | 9  | 53.47  | b4b14y1y2y3y3y4y5y6                                         | 2487.26 | 101.791 | 30443  | 2 | 1244.13 | 5.20   |
| P35579 MYH9_HUMAN Myosin-9 | 50 |                       | VKPLLQVSR                | 833  | 9  | 5  | 38.25  | y2y4y5y7y9                                                  | 1039.66 | 43.884  | 26075  | 2 | 520.33  | -0.94  |
| P35579 MYH9_HUMAN Myosin-9 | 51 | Carbamidomethyl+C(13) | SMMQDREDQSILCTGESGAGK    | 159  | 21 | 6  | 22.32  | b11*b11y8y9*y9y21                                           | 2299.99 | 50.217  | 18751  | 3 | 767.34  | -0.42  |
| P35579 MYH9_HUMAN Myosin-9 | 52 |                       | GALALEEK                 | 1716 | 8  | 4  | 33.07  | b3y3y4y8                                                    | 830.45  | 35.110  | 11934  | 1 | 830.45  | -14.77 |
| P35579 MYH9_HUMAN Myosin-9 | 53 |                       | IAQLEEQLDNETKER          | 1815 | 15 | 4  | 18.12  | b9y6y8y15                                                   | 1815.90 | 50.621  | 11680  | 3 | 605.97  | -2.49  |
| P35579 MYH9_HUMAN Myosin-9 | 54 |                       | SGFEPASLKEEVGEEAIVLVENGK | 38   | 25 | 3  | 35.18  | y3y4y5                                                      | 2660.30 | 89.145  | 6361   | 3 | 887.44  | -11.20 |
| P35579 MYH9_HUMAN Myosin-9 | 55 |                       | FLSNGHVITPGQQDK          | 301  | 15 | 4  | 18.12  | b8*b8y4y6                                                   | 1640.82 | 83.617  | 2011   | 3 | 547.61  | -12.35 |
| P35579 MYH9_HUMAN Myosin-9 | 56 |                       | VSHLLGINVTDFTFR          | 373  | 14 | 14 | 123.42 | b3*b3b5b6b8y3y4y5y6y7*y7*y7y9y10                            | 1571.83 | 75.321  | 188221 | 3 | 524.62  | -14.99 |
| P35579 MYH9_HUMAN Myosin-9 | 57 | Carbamidomethyl+C(4)  | ADFCIIHYAGK              | 565  | 11 | 9  | 113.56 | b3b7b8y3y4y5y7y8y9                                          | 1294.60 | 59.094  | 61157  | 3 | 432.21  | -18.20 |
| P35579 MYH9_HUMAN Myosin-9 | 58 |                       | VIQYLAYVASSHK            | 186  | 13 | 8  | 74.74  | y5*y5y6y8y9y10y11*y11                                       | 1478.77 | 61.211  | 58406  | 3 | 493.60  | -17.17 |
| P35579 MYH9_HUMAN Myosin-9 | 59 |                       | LQQLFNHTMFILEQEEYQR      | 475  | 19 | 4  | 22.71  | b7y4y5*y5                                                   | 2467.23 | 102.138 | 56961  | 3 | 823.08  | 7.22   |
| P35579 MYH9_HUMAN Myosin-9 | 60 | Carbamidomethyl+C(14) | LQLQEQLQAETELCAEAELR     | 882  | 21 | 3  | 13.86  | b3b11y16                                                    | 2501.21 | 81.596  | 46169  | 2 | 1251.11 | -2.83  |
| P35579 MYH9_HUMAN Myosin-9 | 61 |                       | ADEWLMK                  | 580  | 7  | 3  | 40.45  | y3y4y5                                                      | 892.42  | 56.084  | 32041  | 2 | 446.71  | -2.39  |
| P35579 MYH9_HUMAN Myosin-9 | 62 |                       | EEVGEEAIVLVENGK          | 47   | 16 | 7  | 17.15  | b14*b14y5*y5*y5y12*y12                                      | 1743.88 | 91.366  | 25743  | 2 | 872.44  | 9.59   |
| P35579 MYH9_HUMAN Myosin-9 | 63 | Carbamidomethyl+C(7)  | EDQSILCTGESGAGK          | 165  | 15 | 3  | 26.21  | y8y10y11                                                    | 1551.71 | 42.759  | 19491  | 2 | 776.36  | 8.42   |
| P35579 MYH9_HUMAN Myosin-9 | 64 |                       | DYVQK                    | 398  | 5  | 2  | 13.21  | b4*b4                                                       | 652.33  | 33.571  | 13465  | 1 | 652.33  | -5.15  |
| P35579 MYH9_HUMAN Myosin-9 | 65 |                       | ALSLAR                   | 1477 | 6  | 1  | 13.62  | y5                                                          | 630.39  | 35.369  | 7529   | 1 | 630.39  | 1.55   |
| P35579 MYH9_HUMAN Myosin-9 | 66 |                       | QTLNER                   | 1219 | 7  | 6  | 37.44  | b4*b4*b4b5*b5y4                                             | 889.43  | 48.934  | 7126   | 2 | 445.22  | -6.73  |
| P35579 MYH9_HUMAN Myosin-9 | 67 |                       | DMFQETMEAMR              | 316  | 11 | 7  | 47.5   | b3*b3b4*b4*b4b5b7                                           | 1388.56 | 18.191  | 7054   | 3 | 463.52  | -5.54  |
| P35579 MYH9_HUMAN Myosin-9 | 68 |                       | AEAEAR                   | 1466 | 6  | 2  | 13.62  | y5*y5                                                       | 646.31  | 54.256  | 6732   | 1 | 646.31  | -5.67  |
| P35579 MYH9_HUMAN Myosin-9 | 69 |                       | QAQQR                    | 1697 | 6  | 3  | 13.62  | y4*y4*y4                                                    | 759.38  | 34.978  | 5936   | 2 | 380.19  | 10.05  |
| P35579 MYH9_HUMAN Myosin-9 | 70 |                       | LQLEK                    | 961  | 5  | 2  | 13.21  | b4*b4                                                       | 630.38  | 22.953  | 5166   | 2 | 315.70  | 3.97   |
| P35579 MYH9_HUMAN Myosin-9 | 71 |                       | AQFER                    | 1566 | 5  | 1  | 13.21  | b3                                                          | 650.32  | 39.797  | 4782   | 1 | 650.32  | -8.17  |
| P35579 MYH9_HUMAN Myosin-9 | 72 |                       | NWQWWR                   | 823  | 6  | 2  | 26.83  | b3b4                                                        | 975.45  | 23.918  | 3218   | 2 | 488.23  | -7.13  |
| P35579 MYH9_HUMAN Myosin-9 | 73 |                       | NDNSSR                   | 228  | 6  | 1  | 13.62  | y3                                                          | 692.30  | 96.977  | 3204   | 1 | 692.30  | 10.40  |
| P35579 MYH9_HUMAN Myosin-9 | 74 |                       | HEMPPHIYAITDTAYR         | 143  | 16 | 5  | 28.32  | b14*b14y3y4y6                                               | 1914.93 | 88.719  | 2334   | 2 | 957.97  | 4.65   |
| P35579 MYH9_HUMAN Myosin-9 | 75 |                       | DLEAHIDSANK              | 1620 | 11 | 5  | 24.29  | b3b9*b9y8*y8                                                | 1212.58 | 136.355 | 2319   | 1 | 1212.58 | -4.53  |
| P35579 MYH9_HUMAN Myosin-9 | 76 |                       | INFDVNGYIVGANIETYLLEK    | 240  | 21 | 6  | 13.86  | b6*b6b10*b10y12*y12                                         | 2385.20 | 106.513 | 2283   | 3 | 795.74  | -15.35 |
| P35579 MYH9_HUMAN Myosin-9 | 77 | Carbamidomethyl+C(7)  | QELEEICHDLEAR            | 910  | 13 | 7  | 45.5   | b3b4*b4b10b12*b12y9                                         | 1641.74 | 81.419  | 1996   | 2 | 821.37  | -6.84  |
| P35579 MYH9_HUMAN Myosin-9 | 78 |                       | VTTEAK                   | 966  | 6  | 1  | 13.62  | y4                                                          | 648.36  | 38.543  | 1763   | 2 | 324.68  | 7.34   |

|                            |     |                       |                                        |      |    |    |        |                                                                                                                               |         |         |        |   |         |        |
|----------------------------|-----|-----------------------|----------------------------------------|------|----|----|--------|-------------------------------------------------------------------------------------------------------------------------------|---------|---------|--------|---|---------|--------|
| P35579 MYH9_HUMAN Myosin-9 | 79  |                       | ADGAEAKPAE                             | 1950 | 10 | 5  | 28.65  | b8b9°b9y4°y4                                                                                                                  | 958.46  | 116.603 | 1522   | 1 | 958.46  | 12.99  |
| P35579 MYH9_HUMAN Myosin-9 | 80  |                       | DLGEELEALKTELEDTLDSTAAQQ<br>ELR        | 1135 | 27 | 37 | 267.06 | b3b4b5b7b8°b8b9°b9b1<br>2°b12b14b16b20b21°b2<br>1b24°b24b25b26y5°y5*<br>y5y6*y6y7*y7y8y9°y9*<br>y9y10°y10*y10y11y12y<br>14y15 | 3017.48 | 118.586 | 182212 | 3 | 1006.50 | 0.40   |
| P35579 MYH9_HUMAN Myosin-9 | 81  | Carbamidomethyl+C(27) | RQGASFIGILDIAGFEIFDLNSFEQL<br>CINYTNEK | 441  | 34 | 6  | 23.57  | b3b33y10y11*y11y28                                                                                                            | 3922.90 | 96.089  | 124010 | 4 | 981.48  | -9.40  |
| P35579 MYH9_HUMAN Myosin-9 | 82  |                       | EQLLEEEEAHKNLEK                        | 1342 | 15 | 11 | 73.53  | b13y7y8y9°y9*y9y10*y<br>10y12y13°y13                                                                                          | 1854.86 | 35.534  | 103424 | 3 | 618.96  | -8.95  |
| P35579 MYH9_HUMAN Myosin-9 | 83  |                       | KLEGDSTDLSDQIAELQAIAELK                | 1051 | 24 | 24 | 218.96 | b5b7°b7b8b9°b9b10b11<br>b12°b12°b12b13b14°b1<br>4b15b16y3y4y5y6y7y8y<br>9y11                                                  | 2615.34 | 97.245  | 102749 | 3 | 872.45  | -0.37  |
| P35579 MYH9_HUMAN Myosin-9 | 84  |                       | NMDPLNDNIATLLHQSSDKFVSEL<br>WK         | 587  | 26 | 4  | 15.78  | b3b5y5y10                                                                                                                     | 3015.47 | 104.920 | 95186  | 4 | 754.62  | -7.21  |
| P35579 MYH9_HUMAN Myosin-9 | 85  |                       | HSQAVEELAEQLEQTKR                      | 1193 | 17 | 5  | 16.3   | b5°b5°b5b9y8                                                                                                                  | 1995.98 | 66.071  | 78694  | 3 | 666.00  | -13.58 |
| P35579 MYH9_HUMAN Myosin-9 | 86  |                       | AGKLDPHLVLDQLR                         | 679  | 14 | 5  | 52.23  | b3b4b5y6y7                                                                                                                    | 1574.88 | 66.596  | 69116  | 3 | 525.63  | -11.24 |
| P35579 MYH9_HUMAN Myosin-9 | 87  |                       | RGDLPFVVR                              | 1922 | 10 | 9  | 104.72 | b3°b3b4b6b7y4y5y6y7                                                                                                           | 1155.66 | 61.055  | 63931  | 2 | 578.33  | -6.97  |
| P35579 MYH9_HUMAN Myosin-9 | 88  |                       | YLYVDKNFINNPLAQADWAAK                  | 8    | 21 | 3  | 13.86  | b3y5y8                                                                                                                        | 2454.25 | 83.263  | 58373  | 3 | 818.75  | 0.70   |
| P35579 MYH9_HUMAN Myosin-9 | 89  |                       | RQAQQR                                 | 1696 | 7  | 3  | 40.45  | b4y4y6                                                                                                                        | 915.49  | 33.601  | 54061  | 2 | 458.25  | 13.73  |
| P35579 MYH9_HUMAN Myosin-9 | 90  |                       | KLVWVPSDK                              | 29   | 9  | 3  | 30.47  | b5y3y4                                                                                                                        | 1071.62 | 51.380  | 47135  | 2 | 536.31  | 1.48   |
| P35579 MYH9_HUMAN Myosin-9 | 91  |                       | ALEQQVEEMKTQLEEELEDELQAT<br>EDAK       | 1528 | 27 | 6  | 40.87  | b12y3y4y5y10y13                                                                                                               | 3147.50 | 104.959 | 41144  | 3 | 1049.84 | 4.50   |
| P35579 MYH9_HUMAN Myosin-9 | 92  |                       | DLEAHIDSANKNR                          | 1620 | 13 | 9  | 78.92  | b4y3y5y6*y6y7y8*y8y9                                                                                                          | 1482.72 | 32.071  | 39203  | 3 | 494.91  | -8.23  |
| P35579 MYH9_HUMAN Myosin-9 | 93  |                       | TELADKVTK                              | 1268 | 9  | 4  | 45.44  | b3y3y6y7                                                                                                                      | 1004.55 | 26.594  | 39191  | 2 | 502.78  | -10.03 |
| P35579 MYH9_HUMAN Myosin-9 | 94  |                       | EEELQAALARVEEEAAQK                     | 1081 | 18 | 6  | 24.8   | b9°b9b11b16y14°y14                                                                                                            | 2014.00 | 61.363  | 36550  | 2 | 1007.50 | -5.88  |
| P35579 MYH9_HUMAN Myosin-9 | 95  | Carbamidomethyl+C(14) | KLEEEQIILEDQNCK                        | 974  | 15 | 7  | 57.55  | b7°b7b8y3y6y7y8                                                                                                               | 1888.91 | 51.351  | 33411  | 3 | 630.31  | -11.44 |
| P35579 MYH9_HUMAN Myosin-9 | 96  |                       | RHEMPPHIYAITDTAYR                      | 142  | 17 | 8  | 32.73  | b7°b7b13°b13y5°y5y7y<br>11                                                                                                    | 2071.03 | 108.427 | 28355  | 3 | 691.01  | 4.72   |
| P35579 MYH9_HUMAN Myosin-9 | 97  |                       | LKSMEAEMIQLEELAAAER                    | 1674 | 20 | 4  | 36     | b8b9y12y13                                                                                                                    | 2290.12 | 100.703 | 23750  | 3 | 764.05  | -8.21  |
| P35579 MYH9_HUMAN Myosin-9 | 98  |                       | QLEEAEEEAQRANASR                       | 1877 | 16 | 3  | 23.68  | b4y4y5                                                                                                                        | 1830.87 | 105.216 | 23239  | 2 | 915.94  | 9.33   |
| P35579 MYH9_HUMAN Myosin-9 | 99  |                       | LEGDSTDLSDQIAELQAIAELKM<br>QLAK        | 1052 | 28 | 4  | 22.72  | b12b14°b14b15                                                                                                                 | 3058.58 | 90.145  | 21137  | 4 | 765.40  | 7.66   |
| P35579 MYH9_HUMAN Myosin-9 | 100 |                       | IAQLEEEEEEQGNTELINDRLK                 | 1730 | 23 | 4  | 19.45  | b7b9b12°b12                                                                                                                   | 2713.35 | 107.726 | 12107  | 4 | 679.09  | -1.89  |
| P35579 MYH9_HUMAN Myosin-9 | 101 |                       | KANLQIDQINTDLNLER                      | 1753 | 17 | 7  | 32.73  | b3°b3b8b12y6°y6y8                                                                                                             | 1998.05 | 66.018  | 11478  | 2 | 999.53  | -3.67  |
| P35579 MYH9_HUMAN Myosin-9 | 102 |                       | KMQQNIQELEELEEEESAR                    | 939  | 20 | 5  | 25.23  | b11b12°b12b14y14                                                                                                              | 2461.16 | 69.617  | 10699  | 3 | 821.06  | 2.28   |
| P35579 MYH9_HUMAN Myosin-9 | 103 |                       | QFRTEMEDLMSSK                          | 1500 | 13 | 6  | 41.32  | b4°b4b6b7b10°b10                                                                                                              | 1601.73 | 79.597  | 9007   | 2 | 801.37  | -0.46  |
| P35579 MYH9_HUMAN Myosin-9 | 104 |                       | YEILTPNSIPKGFMDGK                      | 720  | 17 | 5  | 26.13  | b5y3y8°y8y14                                                                                                                  | 1909.96 | 97.513  | 8060   | 2 | 955.49  | -4.35  |
| P35579 MYH9_HUMAN Myosin-9 | 105 |                       | QVEDEKNSFR                             | 1332 | 10 | 9  | 91.51  | b3b6°b6b8y4°y4y7y8y9                                                                                                          | 1251.59 | 68.237  | 7932   | 2 | 626.30  | -3.12  |
| P35579 MYH9_HUMAN Myosin-9 | 106 |                       | TQLEEELEDELQATEDAKLR                   | 1538 | 19 | 4  | 14.93  | b3°b3b9y3                                                                                                                     | 2231.09 | 80.162  | 7895   | 3 | 744.37  | -7.44  |
| P35579 MYH9_HUMAN Myosin-9 | 107 |                       | IAEFTTNLTETEEESK                       | 1000 | 16 | 3  | 17.15  | b6b12y10                                                                                                                      | 1868.94 | 65.868  | 7613   | 2 | 934.97  | 13.85  |
| P35579 MYH9_HUMAN Myosin-9 | 108 | Carbamidomethyl+C(12) | FSKVEDMAELTCLNEASVLHNLK                | 79   | 23 | 5  | 20.11  | b17°b17y11y17y20                                                                                                              | 2648.30 | 136.808 | 7544   | 2 | 1324.65 | -3.87  |
| P35579 MYH9_HUMAN Myosin-9 | 109 |                       | ATDKSFVEK                              | 536  | 9  | 4  | 30.47  | b3b4°b4y7                                                                                                                     | 1024.52 | 61.291  | 6883   | 2 | 512.76  | -13.34 |
| P35579 MYH9_HUMAN Myosin-9 | 110 |                       | ELESQISELQEDLESERASR                   | 1107 | 20 | 7  | 27.98  | b9°b9°b9b11b16y12y14                                                                                                          | 2348.11 | 77.271  | 6565   | 2 | 1174.56 | -4.89  |
| P35579 MYH9_HUMAN Myosin-9 | 111 |                       | AGVLAHLEERDLK                          | 764  | 14 | 4  | 30.72  | b3b4b6y3                                                                                                                      | 1579.83 | 85.919  | 6373   | 2 | 790.42  | -6.88  |

|                                    |     |                                         |                        |      |    |    |        |                                                                        |         |         |        |   |         |        |
|------------------------------------|-----|-----------------------------------------|------------------------|------|----|----|--------|------------------------------------------------------------------------|---------|---------|--------|---|---------|--------|
| P35579 MYH9_HUMAN Myosin-9         | 112 |                                         | LLEDRIAFTTNTLEEEEEK    | 995  | 19 | 7  | 38.1   | b4°b4b9b14y4y8y12                                                      | 2280.11 | 47.227  | 5134   | 3 | 760.71  | -4.71  |
| P35579 MYH9_HUMAN Myosin-9         | 113 |                                         | THEAQIQEMRQK           | 1181 | 12 | 4  | 32.16  | b4b9y9y11                                                              | 1498.74 | 84.259  | 4993   | 2 | 749.88  | 0.00   |
| P35579 MYH9_HUMAN Myosin-9         | 114 |                                         | KGAGDGSDEEVDGK         | 1936 | 14 | 5  | 38.5   | b5b6b7°b7y12                                                           | 1363.61 | 46.126  | 3959   | 2 | 682.31  | 12.09  |
| P35579 MYH9_HUMAN Myosin-9         | 115 |                                         | ERNTDQASMPDNTAAQK      | 356  | 17 | 4  | 16.3   | b8b12°b12y11                                                           | 1876.84 | 50.250  | 3586   | 2 | 938.93  | -0.46  |
| P35579 MYH9_HUMAN Myosin-9         | 116 |                                         | RALEQQVEEMK            | 1527 | 11 | 3  | 27.3   | b9y4y5                                                                 | 1360.70 | 76.866  | 2847   | 3 | 454.24  | 6.55   |
| P35579 MYH9_HUMAN Myosin-9         | 117 |                                         | DLQGRDEQSEEK           | 1571 | 12 | 4  | 36.14  | b4b9y4y5                                                               | 1433.66 | 77.358  | 2733   | 2 | 717.33  | 4.77   |
| P35579 MYH9_HUMAN Myosin-9         | 118 |                                         | TEMEDLMSSKDDVGVK       | 1503 | 15 | 4  | 26.21  | y5°y5y6y10                                                             | 1684.77 | 76.345  | 2630   | 3 | 562.26  | 14.71  |
| P35579 MYH9_HUMAN Myosin-9         | 119 |                                         | MQQNIQELEEQLLEEEESARQK | 940  | 21 | 4  | 13.86  | b9°b9y8y11                                                             | 2589.18 | 103.752 | 2052   | 3 | 863.73  | -10.94 |
| P35579 MYH9_HUMAN Myosin-9         | 120 | Carbamidomethyl+C(7)                    | EDQSILCTGESGAGKTENTK   | 165  | 20 | 6  | 38.75  | b10°b10b11b13y12y13                                                    | 2124.98 | 54.696  | 2030   | 2 | 1062.99 | 2.30   |
| P35579 MYH9_HUMAN Myosin-9         | 121 |                                         | LEMDLKDLEAHIDSANK      | 1614 | 17 | 9  | 42.72  | b8°b8b12°b12y4y5y10y12°y12                                             | 1941.95 | 109.999 | 1901   | 2 | 971.48  | -2.07  |
| P35579 MYH9_HUMAN Myosin-9         | 122 |                                         | QTLENERGELANEVK        | 1219 | 15 | 3  | 26.21  | b5b8b14                                                                | 1729.88 | 75.364  | 1709   | 3 | 577.30  | 7.27   |
| P35579 MYH9_HUMAN Myosin-9         | 123 | Phosphoryl STY(17)                      | INFDVNGYIVGANIETYLLEK  | 240  | 21 | 7  | 37     | b6b9b11b15_H3PO4<br>b15°b15y3y9                                        | 2465.20 | 92.663  | 236315 | 3 | 822.40  | 3.27   |
| P35579 MYH9_HUMAN Myosin-9         | 124 | Phosphoryl STY(6)                       | LTEMETLQSQLMAEK        | 867  | 15 | 3  | 26.21  | b4b5b11                                                                | 1831.84 | 87.336  | 13885  | 3 | 611.28  | 14.19  |
| P35579 MYH9_HUMAN Myosin-9         | 125 | Phosphoryl STY(4)                       | QIATLHAQVADMK          | 1357 | 13 | 4  | 32.29  | b5y3y8y9                                                               | 1505.73 | 23.932  | 4038   | 3 | 502.58  | 11.51  |
| P35579 MYH9_HUMAN Myosin-9         | 126 | Phosphoryl STY(13)                      | IIGLDQVAGMSETALPGAFK   | 617  | 20 | 4  | 14.36  | b11b13°b13y6                                                           | 2098.00 | 59.042  | 3277   | 3 | 700.00  | -10.01 |
| P35579 MYH9_HUMAN Myosin-9         | 127 | Oxidation+M(12)                         | LTEMETLQSQLMAEK        | 867  | 15 | 4  | 18.12  | b7y6*y6y13                                                             | 1767.85 | 70.996  | 124517 | 2 | 884.43  | -1.52  |
| P35579 MYH9_HUMAN Myosin-9         | 128 | Carbamidomethyl+C(13);<br>Oxidation+M() | SMMQDREDQSILCTGESGAGK  | 159  | 21 | 4  | 13.86  | b14y10y12°y12                                                          | 2315.96 | 70.990  | 2984   | 2 | 1158.48 | -12.02 |
| P35579 MYH9_HUMAN Myosin-9         | 129 | Carbamidomethyl+C(8);<br>Oxidation+M(9) | LQAQMKDCMRELDTR        | 1642 | 16 | 6  | 28.32  | b7°b7b8°b8b10y11                                                       | 2025.92 | 48.255  | 1851   | 2 | 1013.46 | 1.33   |
| P35579 MYH9_HUMAN Myosin-9         | 130 | Carbamidomethyl+C(7)                    | MEDSVGCLETAEEV         | 1372 | 14 | 0  | 4.45   |                                                                        | 1568.64 | 48.990  | 16170  | 2 | 784.82  | -5.53  |
| P35579 MYH9_HUMAN Myosin-9         | 131 |                                         | PHLVLDQLR              | 684  | 9  | 1  | 7.86   | b3                                                                     | 1090.63 | 71.463  | 14366  | 2 | 545.82  | -2.01  |
| P35579 MYH9_HUMAN Myosin-9         | 132 |                                         | EQLDNETKER             | 1820 | 10 | 0  | 4.05   |                                                                        | 1261.62 | 50.548  | 9938   | 2 | 631.31  | 10.64  |
| P35579 MYH9_HUMAN Myosin-9         | 133 |                                         | DPHLVLDQLR             | 683  | 10 | 0  | 2.43   |                                                                        | 1205.66 | 71.480  | 3787   | 2 | 603.33  | -3.54  |
| P35579 MYH9_HUMAN Myosin-9         | 134 |                                         | ELDSNLYR               | 747  | 8  | 0  | 2.02   |                                                                        | 1009.49 | 60.272  | 2822   | 2 | 505.25  | -9.55  |
| P35579 MYH9_HUMAN Myosin-9         | 135 |                                         | GEEAIVELVENGK          | 50   | 13 | 0  | 8.1    |                                                                        | 1386.70 | 89.130  | 2711   | 2 | 693.85  | -9.95  |
| P35579 MYH9_HUMAN Myosin-9         | 136 |                                         | DNVVTGLLSQSDSK         | 1282 | 13 | 0  | 5.26   |                                                                        | 1363.67 | 81.270  | 2030   | 2 | 682.34  | 2.95   |
| P35579 MYH9_HUMAN Myosin-9         | 137 |                                         | ATLHAQVADMK            | 1359 | 11 | 2  | 16.44  | b4b9                                                                   | 1184.61 | 47.098  | 1866   | 2 | 592.81  | -2.37  |
| P35579 MYH9_HUMAN Myosin-9         | 138 |                                         | FLSNGHVTPGQQDKDMFQET   | 301  | 21 | 4  | 18.28  | y4y13*y13y15                                                           | 2392.12 | 77.294  | 1724   | 2 | 1196.56 | -2.45  |
| P35579 MYH9_HUMAN Myosin-9         | 139 |                                         | EEILAQAK               | 1661 | 8  | 2  | 9.66   | b3°b3                                                                  | 883.48  | 35.483  | 13488  | 2 | 442.24  | -7.60  |
| P35579 MYH9_HUMAN Myosin-9         | 140 |                                         | EEVGEEAIVELVENGKK      | 47   | 17 | 0  | 4.86   |                                                                        | 1853.94 | 75.941  | 12903  | 3 | 618.65  | -4.81  |
| P35579 MYH9_HUMAN Myosin-9         | 141 |                                         | QIATLHAQVADMK          | 1357 | 13 | 0  | 3.24   |                                                                        | 1408.72 | 47.071  | 8255   | 3 | 470.25  | 1.65   |
| P35579 MYH9_HUMAN Myosin-9         | 142 |                                         | DLEGLSQR               | 1392 | 8  | 0  | 1.21   |                                                                        | 899.45  | 39.919  | 2620   | 2 | 450.23  | -2.71  |
| P35579 MYH9_HUMAN Myosin-9         | 143 |                                         | THEAQIQEMR             | 1181 | 10 | 0  | 2.02   |                                                                        | 1225.55 | 29.507  | 1713   | 3 | 409.19  | -6.37  |
| P35579 MYH9_HUMAN Myosin-9         | 144 |                                         | VKPLLQVSR              | 833  | 9  | 0  | 1.62   |                                                                        | 1022.62 | 43.875  | 1654   | 3 | 341.54  | -13.31 |
| P07996 TSP1_HUMAN Thrombospondin-1 | 1   |                                         | FVFGTTPEDILR           | 216  | 12 | 15 | 113.3  | b2b6b12y1y2y3y4y5y6y7y8y9y10°y10y12                                    | 1394.72 | 82.898  | 343715 | 2 | 697.86  | -7.96  |
| P07996 TSP1_HUMAN Thrombospondin-1 | 2   |                                         | TIVTTLQDSIR            | 288  | 11 | 16 | 111.35 | b1°b1b2°b2b3°b3b5y3y4°y4y5y6y7y8y9y11                                  | 1246.70 | 68.239  | 227489 | 2 | 623.85  | -3.52  |
| P07996 TSP1_HUMAN Thrombospondin-1 | 3   |                                         | FTGSQPFQGGVEHATANK     | 623  | 18 | 27 | 181.41 | b2°b2b3b4°b4b5°b5b8b11b13y1y2y3y4y5y6y7°y7y9*y9y11y12y13°y13*y13y16y18 | 1875.89 | 45.225  | 214552 | 3 | 625.97  | -3.84  |
| P07996 TSP1_HUMAN Thrombospondin-1 | 4   |                                         | GGVNDNFQGVLQNVNR       | 201  | 15 | 24 | 184.46 | b2b3b5b7°b7b11b12y2y3*y3y4*y4y5*y5y6y7y8*y8y9y10y11y12y15*y15          | 1616.82 | 66.552  | 190658 | 2 | 808.91  | 3.02   |

|                                     |    |                                                 |                                 |      |    |    |        |                                                                    |         |         |        |   |         |        |
|-------------------------------------|----|-------------------------------------------------|---------------------------------|------|----|----|--------|--------------------------------------------------------------------|---------|---------|--------|---|---------|--------|
| [P07996 TSP1_HUMAN Thrombospondin-1 | 5  |                                                 | GTSQNDPNWVVR                    | 968  | 12 | 14 | 108.74 | b6b9b11*b11y2y3y4y6y7y8y10*y10y12*y12                              | 1372.66 | 47.953  | 189979 | 2 | 686.84  | 1.87   |
| [P07996 TSP1_HUMAN Thrombospondin-1 | 6  |                                                 | MENAELDVPIQSVFTR                | 173  | 16 | 19 | 138.9  | b2b3b4b6b7b8*b8b9b13b16y1y3y5y6*y6y8y10y11y16                      | 1848.91 | 82.054  | 181233 | 2 | 924.96  | -2.91  |
| [P07996 TSP1_HUMAN Thrombospondin-1 | 7  |                                                 | FQMIPLDPK                       | 959  | 9  | 6  | 30.47  | b2*b2b3y5y7y9                                                      | 1088.58 | 70.137  | 152050 | 2 | 544.79  | -3.81  |
| [P07996 TSP1_HUMAN Thrombospondin-1 | 8  |                                                 | GPDPSSPAFR                      | 50   | 10 | 8  | 58.09  | b2b3*b3y4y6y7y8y10                                                 | 1030.49 | 36.659  | 147380 | 2 | 515.75  | -2.84  |
| [P07996 TSP1_HUMAN Thrombospondin-1 | 9  |                                                 | NALWHTGNTPGQVR                  | 1077 | 14 | 5  | 44.74  | y4y5y9y10y14                                                       | 1550.76 | 45.790  | 147095 | 3 | 517.59  | -12.12 |
| [P07996 TSP1_HUMAN Thrombospondin-1 | 10 |                                                 | AQGYSGLSVK                      | 1054 | 10 | 9  | 74.31  | b2*b2b3y3y4y5y6y8y10                                               | 1009.52 | 39.530  | 144068 | 2 | 505.27  | -7.86  |
| [P07996 TSP1_HUMAN Thrombospondin-1 | 11 | Carbamidomethyl+C(3)                            | DNCQYVYNVDQR                    | 810  | 12 | 7  | 64.13  | y2y5y6y7y8y9y12                                                    | 1573.67 | 44.558  | 128096 | 2 | 787.34  | 1.09   |
| [P07996 TSP1_HUMAN Thrombospondin-1 | 12 | Carbamidomethyl+C(2);<br>Carbamidomethyl+C(14)  | LCNSPSPQMNGKPCGEAR              | 460  | 19 | 24 | 206.86 | b2b4b8b11y2y4y5y6y7y8y9y10*y10*y10y11*y11y12y13*y13y15y16y17y18y19 | 2131.92 | 31.955  | 91953  | 3 | 711.31  | -6.18  |
| [P07996 TSP1_HUMAN Thrombospondin-1 | 13 | Carbamidomethyl+C(11);<br>Carbamidomethyl+C(14) | DTDMDGVGDQDCNCPLEHNPQ<br>LDSDSR | 822  | 29 | 11 | 66.71  | y2y3y4*y4y5y8y10y12y19y22y29                                       | 3320.28 | 52.774  | 84798  | 3 | 1107.43 | 3.24   |
| [P07996 TSP1_HUMAN Thrombospondin-1 | 14 |                                                 | GFLLLASLR                       | 86   | 9  | 7  | 61.66  | b2b3y4y5y6y7y9                                                     | 989.61  | 90.544  | 66728  | 2 | 495.31  | -7.96  |
| [P07996 TSP1_HUMAN Thrombospondin-1 | 15 | Carbamidomethyl+C(6);<br>Carbamidomethyl+C(10)  | DLQAICGISCDELSSMVLELR           | 264  | 21 | 10 | 68.38  | b3b4b7y2y3y4y5y7y8y2<br>1                                          | 2409.14 | 102.511 | 60799  | 3 | 803.72  | -1.01  |
| [P07996 TSP1_HUMAN Thrombospondin-1 | 16 |                                                 | GTLLALER                        | 101  | 8  | 7  | 54.07  | y2y3*y3y4y5y6y8                                                    | 872.51  | 57.032  | 56809  | 2 | 436.76  | -6.65  |
| [P07996 TSP1_HUMAN Thrombospondin-1 | 17 |                                                 | LVPNPDQK                        | 911  | 8  | 8  | 40.85  | y2y4*y4*y4y5y6*y6y8                                                | 910.49  | 28.471  | 54801  | 2 | 455.75  | -7.31  |
| [P07996 TSP1_HUMAN Thrombospondin-1 | 18 | Carbamidomethyl+C(2)                            | LCNNPTPQFGGK                    | 517  | 12 | 9  | 73.66  | b2b3y1y3y4y6y8y10y12                                               | 1332.64 | 40.256  | 53907  | 2 | 666.82  | 4.49   |
| [P07996 TSP1_HUMAN Thrombospondin-1 | 19 | Carbamidomethyl+C(1)                            | CTSYPDGSWK                      | 561  | 10 | 5  | 36.89  | b2y6y7y8y10                                                        | 1200.50 | 41.555  | 53112  | 2 | 600.75  | 2.64   |
| [P07996 TSP1_HUMAN Thrombospondin-1 | 20 |                                                 | IPESGGDNSVDFIFELTGAAR           | 20   | 21 | 8  | 45.52  | b3y1y3y4y6y7y13y21                                                 | 2195.09 | 99.858  | 48202  | 2 | 1098.05 | 11.79  |
| [P07996 TSP1_HUMAN Thrombospondin-1 | 21 | Carbamidomethyl+C(2);<br>Carbamidomethyl+C(7)   | TCHIQECDKR                      | 421  | 10 | 19 | 116.17 | b1b2*b2b3*b3b4*b4b5y1y2y3y4y5*y5y6*y6*y6y7y8                       | 1346.58 | 14.991  | 33360  | 3 | 449.53  | -10.24 |
| [P07996 TSP1_HUMAN Thrombospondin-1 | 22 |                                                 | DLASAR                          | 189  | 7  | 5  | 37.44  | b2b3y4y5y7                                                         | 745.42  | 43.024  | 32056  | 1 | 745.42  | -1.31  |
| [P07996 TSP1_HUMAN Thrombospondin-1 | 23 | Carbamidomethyl+C(6)                            | EVPDACFNHNGEHR                  | 593  | 14 | 5  | 19.27  | b10y2y4y7y14                                                       | 1681.70 | 30.760  | 28441  | 3 | 561.24  | -7.33  |
| [P07996 TSP1_HUMAN Thrombospondin-1 | 24 |                                                 | QVTQSYWDTNPTR                   | 1041 | 13 | 7  | 74.74  | y4y5y6y7y10y11y13                                                  | 1595.75 | 49.775  | 25406  | 2 | 798.38  | 3.75   |
| [P07996 TSP1_HUMAN Thrombospondin-1 | 25 |                                                 | DHSGQVFSVVSNGK                  | 110  | 14 | 7  | 42.39  | b9y4*y4y5y7y12y14                                                  | 1460.72 | 47.545  | 21338  | 2 | 730.86  | 5.52   |
| [P07996 TSP1_HUMAN Thrombospondin-1 | 26 | Carbamidomethyl+C(8);<br>Carbamidomethyl+C(12)  | TKDLQAICGISCDELSSMVLELR         | 262  | 23 | 3  | 13.04  | b11y4y13                                                           | 2638.30 | 83.443  | 14331  | 3 | 880.11  | 5.74   |
| [P07996 TSP1_HUMAN Thrombospondin-1 | 27 | Carbamidomethyl+C(2);<br>Carbamidomethyl+C(12)  | DCVGDVTENQICNK                  | 529  | 14 | 4  | 31.51  | b5y4y7y10                                                          | 1651.71 | 42.011  | 13891  | 2 | 826.36  | 4.80   |
| [P07996 TSP1_HUMAN Thrombospondin-1 | 28 |                                                 | IEDANLIPPVDDK                   | 60   | 14 | 5  | 30.72  | b2b6b12b13y7                                                       | 1535.78 | 62.860  | 11991  | 2 | 768.39  | -9.46  |



|                                    |    |                                                                                                                             |                                           |      |    |    |        |                                                                               |         |         |        |   |         |        |
|------------------------------------|----|-----------------------------------------------------------------------------------------------------------------------------|-------------------------------------------|------|----|----|--------|-------------------------------------------------------------------------------|---------|---------|--------|---|---------|--------|
| P07996 TSP1_HUMAN Thrombospondin-1 | 29 |                                                                                                                             | IMADSGPIYDK                               | 1130 | 11 | 3  | 24.29  | b5y7y9                                                                        | 1209.58 | 50.849  | 2002   | 1 | 1209.58 | -5.65  |
| P07996 TSP1_HUMAN Thrombospondin-1 | 30 | Carbamidomethyl+C(3)                                                                                                        | DNCNPLPNSGQEDYDK                          | 715  | 16 | 4  | 39.82  | y4y11y12y13                                                                   | 1865.78 | 82.096  | 121624 | 2 | 933.40  | 11.84  |
| P07996 TSP1_HUMAN Thrombospondin-1 | 31 | Carbamidomethyl+C(5)                                                                                                        | RPPLCYHNGVQYR                             | 313  | 13 | 7  | 46.08  | b4b5y3*y3y5y6*y6                                                              | 1659.80 | 37.022  | 109536 | 3 | 553.94  | -12.36 |
| P07996 TSP1_HUMAN Thrombospondin-1 | 32 | Carbamidomethyl+C(1);<br>Carbamidomethyl+C(10);<br>Carbamidomethyl+C(13)                                                    | CENTDPGYNCLPCPPR                          | 607  | 16 | 4  | 34.55  | y11y12y13*y13                                                                 | 1949.81 | 50.584  | 39845  | 2 | 975.41  | 7.39   |
| P07996 TSP1_HUMAN Thrombospondin-1 | 33 |                                                                                                                             | TLWHDPR                                   | 1091 | 7  | 4  | 40.45  | b6y4y6°y6                                                                     | 924.48  | 25.369  | 38450  | 2 | 462.75  | 17.03  |
| P07996 TSP1_HUMAN Thrombospondin-1 | 34 | Carbamidomethyl+C(1);<br>Carbamidomethyl+C(4);<br>Carbamidomethyl+C(24)                                                     | CDNCPYNHNPDQADTDNNGEGD<br>ACAADIDGDGILNER | 773  | 37 | 4  | 22.05  | y4y6y11y13                                                                    | 4092.60 | 57.856  | 16811  | 3 | 1364.87 | 1.97   |
| P07996 TSP1_HUMAN Thrombospondin-1 | 35 |                                                                                                                             | QHVVSVEEALLATGQWK                         | 137  | 17 | 5  | 16.3   | b8*b8y5*y5y13                                                                 | 1894.97 | 79.606  | 16107  | 3 | 632.33  | -17.52 |
| P07996 TSP1_HUMAN Thrombospondin-1 | 36 | Carbamidomethyl+C(3);<br>Carbamidomethyl+C(8);<br>Carbamidomethyl+C(13)                                                     | QDCPIDGCLSNPCFAGVK                        | 543  | 18 | 6  | 36.97  | b14y4y9y11y15°y15                                                             | 2037.89 | 82.976  | 7129   | 2 | 1019.45 | 1.68   |
| P07996 TSP1_HUMAN Thrombospondin-1 | 37 |                                                                                                                             | TYAGGR                                    | 1141 | 6  | 2  | 26.83  | b3b4                                                                          | 624.31  | 89.912  | 6036   | 1 | 624.31  | -4.30  |
| P07996 TSP1_HUMAN Thrombospondin-1 | 38 | Carbamidomethyl+C(8)                                                                                                        | ELVQTVNCDPGLAVGYDEFNAVD<br>FSGTFFINTER    | 984  | 34 | 5  | 35.05  | b9b10b11b30y9                                                                 | 3824.82 | 106.524 | 3487   | 4 | 956.96  | 12.77  |
| P07996 TSP1_HUMAN Thrombospondin-1 | 39 | Carbamidomethyl+C(3);<br>Carbamidomethyl+C(10)                                                                              | NPCTDGTDCNK                               | 647  | 12 | 12 | 68.31  | b5°b5*b5b6°b6b7°b7b8<br>y3*y3y4*y4                                            | 1418.54 | 18.183  | 2566   | 2 | 709.78  | 1.12   |
| P07996 TSP1_HUMAN Thrombospondin-1 | 40 |                                                                                                                             | IEDANLIPPVPDDKFQDLVDAVR                   | 60   | 23 | 24 | 186.09 | b3b5°b5*b5b6°b6b7°b7<br>b10*b10y3y4y5y6y9*y9<br>y10y11y12°y12y14y15y<br>16y17 | 2579.33 | 88.718  | 361639 | 3 | 860.45  | -2.08  |
| P07996 TSP1_HUMAN Thrombospondin-1 | 41 | Carbamidomethyl+C(21)                                                                                                       | FTGSQPFQGVVEHATANKQVCKP<br>R              | 623  | 24 | 7  | 46.97  | y6*y6y8y11y12y15y19                                                           | 2644.28 | 41.656  | 107629 | 5 | 529.66  | -10.06 |
| P07996 TSP1_HUMAN Thrombospondin-1 | 42 | Carbamidomethyl+C(4);<br>Carbamidomethyl+C(16)                                                                              | IRLCNSPSPQMNGKPEGEAR                      | 458  | 21 | 13 | 124.33 | b4b5b6°b6y4y5y6y7y9y<br>10y11y13y15                                           | 2401.09 | 38.609  | 81703  | 4 | 601.03  | -12.40 |
| P07996 TSP1_HUMAN Thrombospondin-1 | 43 | Carbamidomethyl+C(1);<br>Carbamidomethyl+C(4);<br>Carbamidomethyl+C(15);<br>Carbamidomethyl+C(21);<br>Carbamidomethyl+C(28) | CGACPPGYSGNGIQCTDVDECKE<br>VPDACFNHNGEHR  | 571  | 36 | 6  | 33.95  | b3b4y4y8y10y12                                                                | 4107.63 | 49.931  | 32295  | 5 | 822.33  | -6.30  |
| P07996 TSP1_HUMAN Thrombospondin-1 | 44 | Carbamidomethyl+C(1);<br>Carbamidomethyl+C(11);<br>Carbamidomethyl+C(16)                                                    | CEGSSVQTRTCHIQCEDK                        | 412  | 18 | 5  | 24.8   | b9y3°y3y7y13                                                                  | 2194.90 | 62.851  | 26768  | 3 | 732.30  | -14.57 |
| P07996 TSP1_HUMAN Thrombospondin-1 | 45 | Carbamidomethyl+C(2);<br>Carbamidomethyl+C(14);<br>Carbamidomethyl+C(24)                                                    | LCNNPTPQFGGKDCVGDVTENQI<br>CNK            | 517  | 26 | 3  | 12.13  | b4b12y3                                                                       | 2965.33 | 52.978  | 18258  | 3 | 989.11  | 2.06   |
| P07996 TSP1_HUMAN Thrombospondin-1 | 46 |                                                                                                                             | IMADSGPIYDKTYAGGR                         | 1130 | 17 | 3  | 24.96  | y8y9y15                                                                       | 1814.86 | 47.761  | 17991  | 3 | 605.63  | -5.99  |
| P07996 TSP1_HUMAN Thrombospondin-1 | 47 | Carbamidomethyl+C(7)                                                                                                        | AQLYIDCEKMEALDVPISQSVFT<br>R              | 164  | 25 | 4  | 18.62  | b7b11°b11b22                                                                  | 2969.42 | 105.871 | 16610  | 4 | 743.11  | -4.93  |

|                                               |    |                                                                                                 |                                              |      |    |    |        |                                                                                            |         |         |        |   |         |        |
|-----------------------------------------------|----|-------------------------------------------------------------------------------------------------|----------------------------------------------|------|----|----|--------|--------------------------------------------------------------------------------------------|---------|---------|--------|---|---------|--------|
| [P07996 TSP1_HUMAN Thrombospondin-1           | 48 |                                                                                                 | VTEENKELANELR                                | 300  | 13 | 5  | 29.87  | b3b6°b6*b6b8                                                                               | 1544.81 | 63.011  | 7588   | 3 | 515.61  | 13.28  |
| [P07996 TSP1_HUMAN Thrombospondin-1           | 49 |                                                                                                 | FQMIPLDPKGTQNDPNVVR                          | 959  | 21 | 8  | 26.72  | b3*b3b15y3y8*y8y13*y13                                                                     | 2442.19 | 108.490 | 5150   | 3 | 814.74  | -12.70 |
| [P07996 TSP1_HUMAN Thrombospondin-1           | 50 | Carbamidomethyl+C(2);<br>Carbamidomethyl+C(9)                                                   | SCDSLNNRCEGSSVQTR                            | 404  | 17 | 4  | 24.96  | y8°y8y9y12                                                                                 | 1969.86 | 89.808  | 4139   | 3 | 657.29  | 5.52   |
| [P07996 TSP1_HUMAN Thrombospondin-1           | 51 |                                                                                                 | FYVVMWKQVTQSYWDTNPTR                         | 1034 | 20 | 7  | 27.98  | b5b9b13y10°y10y12°y12                                                                      | 2549.22 | 86.006  | 4043   | 3 | 850.41  | -4.21  |
| [P07996 TSP1_HUMAN Thrombospondin-1           | 52 | Carbamidomethyl+C(4);<br>Carbamidomethyl+C(19);<br>Carbamidomethyl+C(23);<br>Phosphoryl STY(14) | KDACPINGGWGPWSPWDICSVTC<br>GGGVQK            | 485  | 29 | 5  | 16.89  | b13°b13y7y16_HPO3<br>y16y20                                                                | 3269.39 | 92.616  | 412155 | 4 | 818.10  | 1.05   |
| [P07996 TSP1_HUMAN Thrombospondin-1           | 53 | Carbamidomethyl+C(6);<br>Carbamidomethyl+C(10);<br>Oxidation+M(16)                              | DLQAICGISCDELSSMVLELR                        | 264  | 21 | 3  | 13.86  | b4b14y15                                                                                   | 2425.15 | 105.151 | 3019   | 2 | 1213.08 | 3.02   |
| [P07996 TSP1_HUMAN Thrombospondin-1           | 54 | Carbamidomethyl+C(4)                                                                            | PDACFNHNGEHR                                 | 595  | 12 | 0  | 3.64   |                                                                                            | 1453.59 | 30.801  | 41734  | 3 | 485.20  | -6.97  |
| [P07996 TSP1_HUMAN Thrombospondin-1           | 55 |                                                                                                 | NLIPPVPDDK                                   | 64   | 10 | 0  | 3.64   |                                                                                            | 1107.59 | 62.931  | 24442  | 2 | 554.30  | -8.93  |
| [P07996 TSP1_HUMAN Thrombospondin-1           | 56 |                                                                                                 | LWHTGNTPGQVR                                 | 1079 | 12 | 0  | 3.64   |                                                                                            | 1365.70 | 45.821  | 6781   | 2 | 683.35  | -3.66  |
| [P07996 TSP1_HUMAN Thrombospondin-1           | 57 | Carbamidomethyl+C(1);<br>Carbamidomethyl+C(6)                                                   | CHIQCCKR                                     | 422  | 9  | 1  | 8.25   | b3                                                                                         | 1245.53 | 14.988  | 5812   | 3 | 415.85  | -11.56 |
| [P07996 TSP1_HUMAN Thrombospondin-1           | 58 |                                                                                                 | GPDPSSPA                                     | 50   | 8  | 0  | 2.02   |                                                                                            | 727.32  | 36.579  | 3554   | 2 | 364.16  | -12.59 |
| [P07996 TSP1_HUMAN Thrombospondin-1           | 59 |                                                                                                 | SGPIYDK                                      | 1134 | 7  | 0  | 2.43   |                                                                                            | 779.39  | 50.910  | 3355   | 2 | 390.20  | 1.33   |
| [P07996 TSP1_HUMAN Thrombospondin-1           | 60 |                                                                                                 | GTLLALER                                     | 101  | 8  | 0  | 1.21   |                                                                                            | 854.50  | 57.037  | 7530   | 2 | 427.76  | -0.71  |
| [P07996 TSP1_HUMAN Thrombospondin-1           | 61 | Carbamidomethyl+C(6)                                                                            | EVPDACFNHNGEHR                               | 593  | 14 | 0  | 3.64   |                                                                                            | 1663.69 | 30.762  | 6901   | 3 | 555.23  | -5.58  |
| [P69905 HBA_HUMAN Hemoglobin subunit alpha    | 1  |                                                                                                 | VGAHAGEYGAEALER                              | 17   | 15 | 19 | 164.44 | b1b4b5b7b8b9°b9b10b12y1y2y3y4y5y6y7y10y11y15                                               | 1529.72 | 40.704  | 376499 | 3 | 510.58  | -12.29 |
| [P69905 HBA_HUMAN Hemoglobin subunit alpha    | 2  |                                                                                                 | VADALTNVAHVDDMPNALSALS<br>DLHAHK             | 62   | 29 | 33 | 188.99 | b2b3b4°b4b5b6°b6b7°b7°b7b11b13b14°b14°b14b15°y2y3y4y5y7°y7y8y9°y9y10°y10y11y14y24y25y27y29 | 2996.46 | 88.542  | 323851 | 4 | 749.87  | -9.61  |
| [P69905 HBA_HUMAN Hemoglobin subunit alpha    | 3  |                                                                                                 | MFLSFPTTK                                    | 32   | 9  | 16 | 102.55 | b2b3b8y1y2°y2y3°y3y4°y4y5°y5y6y7y8y9                                                       | 1071.55 | 74.506  | 275381 | 2 | 536.28  | -6.04  |
| [P69905 HBA_HUMAN Hemoglobin subunit alpha    | 4  |                                                                                                 | VDPVNFK                                      | 93   | 7  | 4  | 37.44  | b3y2y5y6                                                                                   | 818.43  | 43.183  | 54882  | 2 | 409.72  | -9.47  |
| [P69905 HBA_HUMAN Hemoglobin subunit alpha    | 5  |                                                                                                 | TYFPFDLSHGSAQVK                              | 41   | 16 | 3  | 23.68  | b4y11y12                                                                                   | 1833.89 | 106.825 | 3861   | 3 | 611.97  | -2.93  |
| [P69905 HBA_HUMAN Hemoglobin subunit alpha    | 6  |                                                                                                 | TYFPFDLSHGSAQVKGHGK                          | 41   | 20 | 3  | 14.36  | b4b8y11                                                                                    | 2213.06 | 98.342  | 9692   | 2 | 1107.03 | -14.34 |
| [P69905 HBA_HUMAN Hemoglobin subunit alpha    | 7  | Carbamidomethyl+C(5)                                                                            | LLSHCLLVTLAAHLPAEFTPAVHA<br>SLDKFLASVSTVLTSK | 100  | 40 | 12 | 114.03 | b5b6b14y3y4y5y6y7y8y9y10y21                                                                | 4258.29 | 135.904 | 5920   | 4 | 1065.33 | -10.09 |
| [P69891 HBG1_HUMAN Hemoglobin subunit gamma-1 | 1  |                                                                                                 | LLVVYPWTQR                                   | 31   | 10 | 18 | 116.17 | b2b3b4b5y1y2°y2y3°y3y4y5°y5°y5y6°y6y7y8y10                                                 | 1274.72 | 79.048  | 653049 | 2 | 637.86  | -4.88  |

|                                              |    |                                                                                            |                                              |     |    |    |        |                                                      |         |         |        |   |         |        |
|----------------------------------------------|----|--------------------------------------------------------------------------------------------|----------------------------------------------|-----|----|----|--------|------------------------------------------------------|---------|---------|--------|---|---------|--------|
| P69891 HBG1_HUMAN Hemoglobin subunit gamma-1 | 2  | Carbamidomethyl+C(11)                                                                      | GTFAQLSELHCDK                                | 83  | 13 | 6  | 29.87  | b4b7b10°b10*b10y13                                   | 1505.72 | 55.531  | 6690   | 2 | 753.36  | 8.76   |
| P69891 HBG1_HUMAN Hemoglobin subunit gamma-1 | 3  |                                                                                            | MGHFTEEDKATITSLWGK                           | 0   | 18 | 4  | 15.57  | b13°b13b16y13                                        | 2050.98 | 121.637 | 38556  | 2 | 1026.00 | -3.57  |
| P69891 HBG1_HUMAN Hemoglobin subunit gamma-1 | 4  |                                                                                            | VNVEDAGGETLGRLLVVYPWTQR                      | 18  | 23 | 5  | 13.04  | b13°b13b18°b18y15                                    | 2572.33 | 136.856 | 5893   | 2 | 1286.67 | -9.59  |
| P69891 HBG1_HUMAN Hemoglobin subunit gamma-1 | 5  |                                                                                            | MVTAVASALSSRYH                               | 133 | 14 | 9  | 72.33  | b3b4°b4b6°b6b10b11y3y4                               | 1492.77 | 66.014  | 5524   | 3 | 498.26  | 6.13   |
| P69891 HBG1_HUMAN Hemoglobin subunit gamma-1 | 6  | Carbamidomethyl+C(11)                                                                      | GTFAQLSELHCDK                                | 83  | 13 | 0  | 3.24   |                                                      | 1487.69 | 55.549  | 2230   | 3 | 496.57  | 1.97   |
| P69892 HBG2_HUMAN Hemoglobin subunit gamma-2 | 1  |                                                                                            | LLVVYPWTQR                                   | 31  | 10 | 18 | 116.17 | b2b3b4b5y1y2°y2y3°y3y4y5°y5°y5y6°y6y7y8y10           | 1274.72 | 79.048  | 653049 | 2 | 637.86  | -4.88  |
| P69892 HBG2_HUMAN Hemoglobin subunit gamma-2 | 2  | Carbamidomethyl+C(11)                                                                      | GTFAQLSELHCDK                                | 83  | 13 | 6  | 29.87  | b4b7b10°b10*b10y13                                   | 1505.72 | 55.531  | 6690   | 2 | 753.36  | 8.76   |
| P69892 HBG2_HUMAN Hemoglobin subunit gamma-2 | 3  | Phosphoryl STY()                                                                           | FFDSFGNLSASAIMGNPK                           | 41  | 19 | 5  | 20.68  | b4b8°b8y7y9                                          | 2069.92 | 43.076  | 3942   | 2 | 1035.46 | 12.03  |
| Q9BQE3 TBA1C_HUMAN Tubulin alpha-1C chain    | 1  |                                                                                            | AVFVDLEPTVIDEVR                              | 64  | 15 | 21 | 201.65 | b3b4b5b6b7b13b14y2y3y4°y4y5°y5y8y9°y9y10y11y12y13y15 | 1701.91 | 84.492  | 273928 | 2 | 851.46  | 3.37   |
| Q9BQE3 TBA1C_HUMAN Tubulin alpha-1C chain    | 2  |                                                                                            | VGINYQPPTVPPGGDLAK                           | 352 | 18 | 15 | 94.35  | b5°b5b6b7b8b10b11°b11y1y2y3y7y8y12y18                | 1824.99 | 65.865  | 221198 | 2 | 913.00  | 1.54   |
| Q9BQE3 TBA1C_HUMAN Tubulin alpha-1C chain    | 3  |                                                                                            | NLDIERPTYTNLNR                               | 215 | 14 | 18 | 81.07  | b2°b2b3b5°b5°b5b11°y2y3y4°y4y6y7y8°y8y12y14°y14      | 1718.86 | 52.848  | 136360 | 3 | 573.63  | -11.29 |
| Q9BQE3 TBA1C_HUMAN Tubulin alpha-1C chain    | 4  |                                                                                            | LISQIVSSITASLR                               | 229 | 14 | 9  | 86.51  | b4°b4b5y3y4y5y8y9y12                                 | 1487.88 | 100.837 | 88935  | 2 | 744.44  | 2.05   |
| Q9BQE3 TBA1C_HUMAN Tubulin alpha-1C chain    | 5  |                                                                                            | EIIDLVLDLR                                   | 112 | 9  | 8  | 61.66  | b2b3y1y3y4y5y6y9                                     | 1085.62 | 79.694  | 76890  | 2 | 543.31  | -4.39  |
| Q9BQE3 TBA1C_HUMAN Tubulin alpha-1C chain    | 6  |                                                                                            | EDMAALEK                                     | 422 | 8  | 7  | 49.3   | b2b4°b4y3y4y5y8                                      | 906.42  | 36.781  | 55448  | 2 | 453.71  | -4.85  |
| Q9BQE3 TBA1C_HUMAN Tubulin alpha-1C chain    | 7  |                                                                                            | FDGALNVDLTEFQTNLVPYPR                        | 243 | 21 | 10 | 44.02  | b2b3b5b17y2y4y5y12y14y21                             | 2409.23 | 94.898  | 47635  | 2 | 1205.12 | 8.92   |
| Q9BQE3 TBA1C_HUMAN Tubulin alpha-1C chain    | 8  |                                                                                            | LSVDYGKK                                     | 156 | 8  | 8  | 67.28  | b2y3y4y5y6°y6y7y8                                    | 909.50  | 29.926  | 30988  | 2 | 455.25  | -5.50  |
| Q9BQE3 TBA1C_HUMAN Tubulin alpha-1C chain    | 9  | Carbamidomethyl+C(8)                                                                       | TIQFVDWCPTGFK                                | 339 | 13 | 4  | 32.29  | b3b4b7y11                                            | 1598.77 | 83.487  | 59224  | 2 | 799.89  | 4.81   |
| Q9BQE3 TBA1C_HUMAN Tubulin alpha-1C chain    | 10 | Carbamidomethyl+C(15)                                                                      | AYHEQLTVAEITNACFEPANQMV<br>K                 | 280 | 24 | 6  | 28.72  | b3b4b6b12y11°y11                                     | 2764.25 | 77.761  | 19885  | 4 | 691.82  | -20.05 |
| Q9BQE3 TBA1C_HUMAN Tubulin alpha-1C chain    | 11 | Phosphoryl STY()                                                                           | AFVHWYVGEEMEEGFSEARED<br>MAALEK              | 402 | 28 | 4  | 17.31  | b8y7y11y13                                           | 3297.41 | 82.979  | 2027   | 4 | 825.11  | 8.96   |
| Q9BQE3 TBA1C_HUMAN Tubulin alpha-1C chain    | 12 | Carbamidomethyl+C(4);<br>Carbamidomethyl+C(20);<br>Carbamidomethyl+C(25);<br>Oxidation+M() | MRECISIHVGQAGVQIGNACWELY<br>CLEHGIQPDGQMPSDK | 0   | 40 | 4  | 14.21  | b3b6b22y11                                           | 4600.06 | 89.815  | 1828   | 3 | 1534.02 | -8.28  |
| P02776 PLF4_HUMAN Platelet factor 4          | 1  |                                                                                            | HITSLEVIK                                    | 53  | 9  | 14 | 91.1   | b1b2b4°b4b5°b5b6b7y1y2y4y7y8y9                       | 1039.61 | 48.427  | 363159 | 2 | 520.31  | -6.22  |
| P02776 PLF4_HUMAN Platelet factor 4          | 2  | Carbamidomethyl+C(5)                                                                       | AGPHCPTAQLIATLK                              | 62  | 15 | 10 | 88.95  | b4b5b8b9b14y3y4y5y11y15                              | 1577.82 | 61.194  | 283295 | 3 | 526.61  | -14.70 |
| P02776 PLF4_HUMAN Platelet factor 4          | 3  | Carbamidomethyl+C(2)                                                                       | ICLDLQAPLYK                                  | 81  | 11 | 8  | 52.93  | b2b4y2y4y8y9y10y11                                   | 1333.72 | 73.898  | 135734 | 2 | 667.36  | -1.19  |
| P02776 PLF4_HUMAN Platelet factor 4          | 4  | Carbamidomethyl+C(3)                                                                       | KICLDLQAPLYK                                 | 80  | 12 | 4  | 40.12  | b5b6y4y5                                             | 1461.82 | 67.543  | 61920  | 2 | 731.41  | 3.34   |
| P02776 PLF4_HUMAN Platelet factor 4          | 5  | Carbamidomethyl+C(2);<br>Phosphoryl STY(10)                                                | ICLDLQAPLYK                                  | 81  | 11 | 4  | 38.29  | b8b10_H3PO4 b10y6y7                                  | 1413.68 | 54.633  | 5268   | 2 | 707.34  | 3.37   |

|                                        |    |                                                                                                 |                                             |     |    |    |        |                                                                |         |         |        |   |         |        |
|----------------------------------------|----|-------------------------------------------------------------------------------------------------|---------------------------------------------|-----|----|----|--------|----------------------------------------------------------------|---------|---------|--------|---|---------|--------|
| Q9H4B7/TBB1_HUMAN Tubulin beta-1 chain | 1  |                                                                                                 | LGALFQPDSFVHGNSGAGNNWA<br>K                 | 80  | 23 | 16 | 112.04 | b2b3b4b5b6*b6b10b11<br>b14y2y11y12y15y16y17<br>y23             | 2387.15 | 74.818  | 336194 | 3 | 796.39  | -0.31  |
| Q9H4B7/TBB1_HUMAN Tubulin beta-1 chain | 2  |                                                                                                 | LAVNMVFPFR                                  | 252 | 10 | 12 | 99.95  | b2b3b5y1y4y5y6y7*y7y<br>8y9y10                                 | 1143.63 | 72.920  | 246238 | 2 | 572.32  | -1.81  |
| Q9H4B7/TBB1_HUMAN Tubulin beta-1 chain | 3  |                                                                                                 | AVLVDLEPGTMSIRS                             | 62  | 15 | 14 | 153.06 | b3b4y2y3y4y5y7y8y9y1<br>0y11y12y13y15                          | 1615.84 | 74.958  | 233801 | 2 | 808.42  | 1.06   |
| Q9H4B7/TBB1_HUMAN Tubulin beta-1 chain | 4  |                                                                                                 | IMNSFSVMPSPK                                | 162 | 12 | 10 | 98.34  | b2y3y5y7y8y9y10°y10y<br>11y12                                  | 1337.66 | 63.770  | 139967 | 2 | 669.33  | 1.73   |
| Q9H4B7/TBB1_HUMAN Tubulin beta-1 chain | 5  |                                                                                                 | LHFFMPGFAPLTAQGSQQYR                        | 262 | 20 | 22 | 154.77 | b2b4b5b6b9b12y2y3*y3<br>y5*y5y6y7*y7*y7y8y9y<br>11y13y14y15y20 | 2296.12 | 88.646  | 128913 | 3 | 766.05  | -4.47  |
| Q9H4B7/TBB1_HUMAN Tubulin beta-1 chain | 6  |                                                                                                 | ALSV AELTQQMFDAR                            | 282 | 15 | 15 | 107.91 | b5°b5b11b14y2y3y4y5y<br>6*y6y7y8*y8y10y15                      | 1679.85 | 92.356  | 114422 | 2 | 840.43  | 2.54   |
| Q9H4B7/TBB1_HUMAN Tubulin beta-1 chain | 7  | Carbamidomethyl+C(6);<br>Carbamidomethyl+C(8)                                                   | HESESCDCLQGFQIVHSLGGGTGS<br>GMGTLLMNK       | 121 | 33 | 9  | 43.86  | b31y2y3y9y11y12y13y1<br>5y33                                   | 3507.56 | 82.868  | 104239 | 4 | 877.65  | -4.52  |
| Q9H4B7/TBB1_HUMAN Tubulin beta-1 chain | 8  | Carbamidomethyl+C(4)                                                                            | NSSCFVEWIPNNVK                              | 336 | 14 | 10 | 58.61  | b1b9y4y5*y5y7y8°y8y1<br>3y14                                   | 1693.81 | 75.628  | 80199  | 2 | 847.41  | 4.47   |
| Q9H4B7/TBB1_HUMAN Tubulin beta-1 chain | 9  |                                                                                                 | GASALQLER                                   | 37  | 9  | 6  | 45.44  | b6y3y4*y4y7y9                                                  | 944.51  | 41.362  | 60039  | 2 | 472.76  | -2.71  |
| Q9H4B7/TBB1_HUMAN Tubulin beta-1 chain | 10 |                                                                                                 | LTTPTYGDLNHLVSLTMSGITTS<br>L<br>R           | 216 | 25 | 12 | 82.59  | y2y3y4y5y7y8y10°y10y<br>12y14y22y25                            | 2691.40 | 107.731 | 50656  | 3 | 897.80  | -1.45  |
| Q9H4B7/TBB1_HUMAN Tubulin beta-1 chain | 11 |                                                                                                 | GHYTEGAEIENVLEVVR                           | 103 | 18 | 7  | 32.72  | b2b3b10y2y3y4y8                                                | 2028.03 | 99.686  | 47701  | 3 | 676.68  | -4.15  |
| Q9H4B7/TBB1_HUMAN Tubulin beta-1 chain | 12 |                                                                                                 | EVDQQLLSVQTR                                | 324 | 12 | 6  | 44.89  | y3y5*y5y6y10y12                                                | 1415.75 | 52.951  | 40541  | 2 | 708.38  | 3.02   |
| Q9H4B7/TBB1_HUMAN Tubulin beta-1 chain | 13 |                                                                                                 | IREEYPDR                                    | 154 | 8  | 6  | 36.08  | b2b4b7y1y3y8                                                   | 1077.53 | 25.572  | 26155  | 2 | 539.27  | -3.40  |
| Q9H4B7/TBB1_HUMAN Tubulin beta-1 chain | 14 |                                                                                                 | VSEHFSAMFK                                  | 380 | 10 | 6  | 26.89  | b1b5b8y5°y5y10                                                 | 1182.54 | 54.411  | 9084   | 3 | 394.85  | -14.45 |
| Q9H4B7/TBB1_HUMAN Tubulin beta-1 chain | 15 |                                                                                                 | GLSMAATFIGNNTAIQEIFNR                       | 359 | 21 | 5  | 29.73  | b9b14y6y7y12                                                   | 2268.14 | 100.687 | 26078  | 3 | 756.72  | -3.77  |
| Q9H4B7/TBB1_HUMAN Tubulin beta-1 chain | 16 | Carbamidomethyl+C(10)                                                                           | EIVHIQIGCCGNQIGAK                           | 2   | 17 | 3  | 23.29  | b13y7y8                                                        | 1864.98 | 56.302  | 12924  | 2 | 932.99  | 5.37   |
| Q9H4B7/TBB1_HUMAN Tubulin beta-1 chain | 17 |                                                                                                 | FPGQLNADLR                                  | 241 | 10 | 4  | 40.11  | b6b8b9y3                                                       | 1130.58 | 25.380  | 5470   | 2 | 565.79  | -12.63 |
| Q9H4B7/TBB1_HUMAN Tubulin beta-1 chain | 18 |                                                                                                 | AFVHWYTSEGMDINEFGAENNI<br>HDLVSEYQQFQDAK    | 392 | 37 | 9  | 47.95  | b12y3y4°y4y7y8y9y12*<br>y12                                    | 4361.95 | 88.612  | 5340   | 3 | 1454.65 | 3.36   |
| Q9H4B7/TBB1_HUMAN Tubulin beta-1 chain | 19 |                                                                                                 | MSTK                                        | 320 | 4  | 2  | 26.02  | b3y3                                                           | 466.24  | 37.064  | 2339   | 1 | 466.24  | 14.14  |
| Q9H4B7/TBB1_HUMAN Tubulin beta-1 chain | 20 | Carbamidomethyl+C(4)                                                                            | VAVCDIPPRGLSMAATFIGNNTAI<br>QEIFNR          | 350 | 30 | 9  | 28.34  | b6b15°b15y3*y3y6*y6y<br>7y12                                   | 3275.68 | 103.696 | 45364  | 3 | 1092.56 | 3.43   |
| Q9H4B7/TBB1_HUMAN Tubulin beta-1 chain | 21 |                                                                                                 | EEYPDRIMNSFSVMPSPK                          | 156 | 18 | 4  | 15.57  | b10b12y11*y11                                                  | 2126.98 | 62.136  | 3463   | 3 | 709.66  | -4.36  |
| Q9H4B7/TBB1_HUMAN Tubulin beta-1 chain | 22 | Carbamidomethyl+C(25)<br>;Carbamidomethyl+C(27)<br>;Carbamidomethyl+C(3<br>7);Phosphoryl STY(9) | VSDTVVEPYNAVLSIHQLIENADA<br>CFCIDNEALYDICFR | 174 | 39 | 7  | 33.11  | b4b7b8y7y10y11°y11                                             | 4654.07 | 89.803  | 6756   | 4 | 1164.27 | -3.99  |
| Q9H4B7/TBB1_HUMAN Tubulin beta-1 chain | 23 |                                                                                                 | SEHFSAMFK                                   | 381 | 9  | 0  | 2.02   |                                                                | 1083.50 | 54.401  | 4967   | 2 | 542.25  | 8.00   |
| Q9H4B7/TBB1_HUMAN Tubulin beta-1 chain | 24 |                                                                                                 | VNMVFPFR                                    | 254 | 8  | 0  | 2.02   |                                                                | 959.52  | 72.983  | 3488   | 2 | 480.26  | 3.44   |
| Q9H4B7/TBB1_HUMAN Tubulin beta-1 chain | 25 |                                                                                                 | NSFSVMPSPK                                  | 164 | 10 | 2  | 7.6    | b4°b4                                                          | 1093.54 | 63.801  | 2547   | 2 | 547.27  | 4.91   |

|                                           |    |                                                                          |                                       |     |    |    |        |                                                                                |         |        |        |   |         |        |
|-------------------------------------------|----|--------------------------------------------------------------------------|---------------------------------------|-----|----|----|--------|--------------------------------------------------------------------------------|---------|--------|--------|---|---------|--------|
| Q9H4B7 TBB1_HUMAN Tubulin beta-1 chain    | 26 |                                                                          | SALQLER                               | 39  | 7  | 1  | 8.81   | b5                                                                             | 816.47  | 41.381 | 2521   | 1 | 816.47  | 9.79   |
| Q71U36 TBA1A_HUMAN Tubulin alpha-1A chain | 1  |                                                                          | AVFVDLEPTVIDEVR                       | 64  | 15 | 21 | 201.65 | b3b4b5b6b7b13b14y2y3y4*y4y5*y5y8y9*y9y10y11y12y13y15                           | 1701.91 | 84.492 | 273928 | 2 | 851.46  | 3.37   |
| Q71U36 TBA1A_HUMAN Tubulin alpha-1A chain | 2  |                                                                          | VGINYQPPTVPPGDLAK                     | 352 | 18 | 15 | 94.35  | b5*b5b6b7b8b10b11*b11y1y2y3y7y8y12y18                                          | 1824.99 | 65.865 | 221198 | 2 | 913.00  | 1.54   |
| Q71U36 TBA1A_HUMAN Tubulin alpha-1A chain | 3  |                                                                          | NLDIERPTYTNLNR                        | 215 | 14 | 18 | 81.07  | b2*b2b3b5*b5*b5b11*y2y3y4*y4y6y7y8*y8y12y14*y14                                | 1718.86 | 52.848 | 136360 | 3 | 573.63  | -11.29 |
| Q71U36 TBA1A_HUMAN Tubulin alpha-1A chain | 4  |                                                                          | EIIDLVDR                              | 112 | 9  | 8  | 61.66  | b2b3y1y3y4y5y6y9                                                               | 1085.62 | 79.694 | 76890  | 2 | 543.31  | -4.39  |
| Q71U36 TBA1A_HUMAN Tubulin alpha-1A chain | 5  | Carbamidomethyl+C(15)                                                    | AYHEQLSVAEITNACFEPANQMV<br>K          | 280 | 24 | 7  | 39.61  | b3b7b9b10y7y9y11                                                               | 2750.30 | 73.543 | 69795  | 3 | 917.44  | 4.70   |
| Q71U36 TBA1A_HUMAN Tubulin alpha-1A chain | 6  |                                                                          | EDMAALEK                              | 422 | 8  | 7  | 49.3   | b2b4*b4y3y4y5y8                                                                | 906.42  | 36.781 | 55448  | 2 | 453.71  | -4.85  |
| Q71U36 TBA1A_HUMAN Tubulin alpha-1A chain | 7  |                                                                          | FDGALNVDLTEFQTNLVPYPR                 | 243 | 21 | 10 | 44.02  | b2b3b5b17y2y4y5y12y14y21                                                       | 2409.23 | 94.898 | 47635  | 2 | 1205.12 | 8.92   |
| Q71U36 TBA1A_HUMAN Tubulin alpha-1A chain | 8  |                                                                          | LSVDYGKK                              | 156 | 8  | 8  | 67.28  | b2y3y4y5y6*y6y7y8                                                              | 909.50  | 29.926 | 30988  | 2 | 455.25  | -5.50  |
| Q71U36 TBA1A_HUMAN Tubulin alpha-1A chain | 9  | Carbamidomethyl+C(8);<br>Phosphoryl STY()                                | TIQFVDWCPTGFK                         | 339 | 13 | 5  | 29.65  | b7*b7b9y4y10                                                                   | 1678.73 | 32.092 | 1787   | 2 | 839.87  | 5.02   |
| P02679 FIBG_HUMAN Fibrinogen gamma chain  | 1  |                                                                          | AIQLTYNPDESSKPNMIDAATLK               | 88  | 23 | 27 | 157.82 | b1b2b3b4b5*b5b11*b11b15y2y3y4y6y10*y10*y10y14*y14y16y17y18*y18y19y20y21y23*y23 | 2520.26 | 66.664 | 479864 | 3 | 840.76  | -0.97  |
| P02679 FIBG_HUMAN Fibrinogen gamma chain  | 2  |                                                                          | EGFGHLSPTGTTEFWLGNK                   | 238 | 20 | 18 | 100.46 | b2b4b6b7b8b12*b12b13*b13b14*b14y4y6y8*y8y13*y13y20                             | 2207.03 | 77.312 | 279385 | 3 | 736.35  | -4.42  |
| P02679 FIBG_HUMAN Fibrinogen gamma chain  | 3  |                                                                          | YEASILTHDSSIR                         | 121 | 13 | 13 | 126.92 | b1b2b3b4y3y4y5y6y7y8y9y10y13                                                   | 1491.72 | 49.568 | 183918 | 3 | 497.91  | -12.68 |
| P02679 FIBG_HUMAN Fibrinogen gamma chain  | 4  |                                                                          | VELEDWNGR                             | 273 | 9  | 8  | 57.48  | b1y1y3y5y7y8*y8y9                                                              | 1117.53 | 52.230 | 168656 | 2 | 559.27  | 1.09   |
| P02679 FIBG_HUMAN Fibrinogen gamma chain  | 5  | Carbamidomethyl+C(8);<br>Carbamidomethyl+C(12);<br>Carbamidomethyl+C(26) | VAQLEAQCQEPCCKDTVQIHDITGK<br>DCQDIANK | 153 | 32 | 12 | 45.09  | b2b3b5*b5y2y3y4y8y11y13y14y32                                                  | 3712.70 | 50.246 | 166214 | 5 | 743.35  | -10.00 |
| P02679 FIBG_HUMAN Fibrinogen gamma chain  | 6  |                                                                          | ASTPNGYDNGIHWATWK                     | 382 | 17 | 5  | 36.92  | b4y4y5y6y17                                                                    | 1893.92 | 81.187 | 121574 | 2 | 947.46  | 4.32   |
| P02679 FIBG_HUMAN Fibrinogen gamma chain  | 7  | Carbamidomethyl+C(5);<br>Carbamidomethyl+C(9)                            | FGSYCPTTCGIADFLSTYQTK                 | 40  | 21 | 17 | 118.59 | b2b3*b3b5y2y3y4y5y6y7y8y10y12y13y16*y16y21                                     | 2417.10 | 88.804 | 119907 | 2 | 1209.05 | 6.77   |
| P02679 FIBG_HUMAN Fibrinogen gamma chain  | 8  | Carbamidomethyl+C(8);<br>Carbamidomethyl+C(12)                           | VAQLEAQCQEPCCKDTVQIHDITGK             | 153 | 24 | 9  | 42.83  | b2b10*b10y3y6y19y20y21y24                                                      | 2768.31 | 50.984 | 112912 | 4 | 692.83  | -7.41  |
| P02679 FIBG_HUMAN Fibrinogen gamma chain  | 9  |                                                                          | YLQEIYNSNNQK                          | 134 | 12 | 18 | 121.16 | b2b3b4*b4b5b10y3y6y7*y7*y7y8*y8y9y10*y10y12*y12                                | 1513.73 | 44.826 | 105163 | 2 | 757.37  | 3.15   |
| P02679 FIBG_HUMAN Fibrinogen gamma chain  | 10 |                                                                          | IHLISTQSAIPYALR                       | 258 | 15 | 9  | 72.23  | b2b3b4y4y5y11y12y13y15                                                         | 1682.94 | 70.803 | 103131 | 3 | 561.65  | -10.73 |
| P02679 FIBG_HUMAN Fibrinogen gamma chain  | 11 | Carbamidomethyl+C(3);<br>Carbamidomethyl+C(4)                            | DNCCILDER                             | 31  | 9  | 10 | 67.68  | y2*y2y3*y3y4y5y6y7y9*y9                                                        | 1194.49 | 44.901 | 102071 | 2 | 597.75  | 0.20   |
| P02679 FIBG_HUMAN Fibrinogen gamma chain  | 12 |                                                                          | LTIGEGQQHHLGGAK                       | 417 | 15 | 7  | 58.56  | b10y5y6y7y12y13y15                                                             | 1545.79 | 33.059 | 49922  | 4 | 387.20  | -14.21 |

|                                                   |    |                                             |                            |     |    |    |        |                                |         |         |        |   |         |        |
|---------------------------------------------------|----|---------------------------------------------|----------------------------|-----|----|----|--------|--------------------------------|---------|---------|--------|---|---------|--------|
| P02679 FIBG_HUMAN Fibrinogen gamma chain          | 13 |                                             | QVRPEHPAETEDSLYPEDDL       | 432 | 21 | 9  | 35.17  | b2*b2b5b9*b9b13*b13y15y16      | 2503.13 | 92.664  | 32487  | 4 | 626.54  | 0.98   |
| P02679 FIBG_HUMAN Fibrinogen gamma chain          | 14 | Carbamidomethyl+C(13)                       | DTVQIHIDITGKDCQDIANK       | 166 | 19 | 4  | 14.93  | b12*b12y7y9                    | 2171.05 | 59.977  | 3931   | 4 | 543.52  | 6.41   |
| P02679 FIBG_HUMAN Fibrinogen gamma chain          | 15 |                                             | MSWSLHPR                   | 0   | 8  | 3  | 36.08  | b4b7y7                         | 1013.51 | 37.081  | 1827   | 2 | 507.26  | 14.57  |
| P02679 FIBG_HUMAN Fibrinogen gamma chain          | 16 |                                             | QSGLYFIKPLK                | 188 | 11 | 3  | 36.05  | y3y4y5                         | 1293.73 | 65.480  | 99573  | 3 | 431.92  | -19.63 |
| P02679 FIBG_HUMAN Fibrinogen gamma chain          | 17 |                                             | NWIQYK                     | 232 | 6  | 4  | 40.04  | b3y3*y3y4                      | 851.43  | 49.842  | 77637  | 2 | 426.22  | -8.96  |
| P02679 FIBG_HUMAN Fibrinogen gamma chain          | 18 |                                             | DLQSLEDILHQVENK            | 64  | 15 | 5  | 39.9   | b9y3y8y9y12                    | 1780.90 | 106.643 | 23617  | 2 | 890.95  | -4.46  |
| P02679 FIBG_HUMAN Fibrinogen gamma chain          | 19 | Carbamidomethyl+C(8); Carbamidomethyl+C(12) | VAQLEAQCQEPCCK             | 153 | 13 | 3  | 20.63  | b3y5y8                         | 1560.72 | 32.907  | 8371   | 2 | 780.86  | 4.77   |
| P02679 FIBG_HUMAN Fibrinogen gamma chain          | 20 | Carbamidomethyl+C(9)                        | ANQQFLVYCEIDGSGNGWTVFQK    | 199 | 23 | 6  | 20.11  | b6*b6b11*b11b18y9              | 2661.24 | 101.255 | 2625   | 3 | 887.75  | -0.83  |
| P02679 FIBG_HUMAN Fibrinogen gamma chain          | 21 |                                             | TSTADYAMFK                 | 282 | 10 | 4  | 43.12  | b6y4y5y6                       | 1134.54 | 22.884  | 2193   | 2 | 567.77  | 19.04  |
| P02679 FIBG_HUMAN Fibrinogen gamma chain          | 22 |                                             | WYSMK                      | 401 | 5  | 1  | 13.21  | y3                             | 714.34  | 38.929  | 1596   | 2 | 357.67  | 12.22  |
| P02679 FIBG_HUMAN Fibrinogen gamma chain          | 23 |                                             | NWIQYKEGFGHLSPTGTTEFWLGNEK | 232 | 26 | 8  | 47.4   | b4*b4b6b7b9*b9b10b12           | 3039.46 | 118.564 | 146681 | 3 | 1013.83 | 0.00   |
| P02679 FIBG_HUMAN Fibrinogen gamma chain          | 24 |                                             | VGPEADKYR                  | 292 | 9  | 11 | 102.55 | b3b8*b8y3y4y5*y5y6y7*y7y8      | 1034.53 | 24.049  | 42637  | 2 | 517.77  | 0.59   |
| P02679 FIBG_HUMAN Fibrinogen gamma chain          | 25 | Carbamidomethyl+C(9)                        | ANQQFLVYCEIDGSGNGWTVFQKR   | 199 | 24 | 5  | 23.41  | b5*b5b6b13y14                  | 2817.37 | 80.314  | 18502  | 3 | 939.80  | 11.53  |
| P02679 FIBG_HUMAN Fibrinogen gamma chain          | 26 |                                             | VELEDWNGRTSTADYAMFK        | 273 | 19 | 4  | 28.46  | b10b13y12y13                   | 2233.04 | 86.058  | 2529   | 4 | 559.01  | 6.67   |
| P02679 FIBG_HUMAN Fibrinogen gamma chain          | 27 |                                             | TRWYSMK                    | 399 | 7  | 3  | 37.44  | b4y3y4                         | 971.47  | 100.646 | 2214   | 1 | 971.47  | -6.72  |
| P02679 FIBG_HUMAN Fibrinogen gamma chain          | 28 |                                             | MLEEIMKYEASILTHDSSIR       | 114 | 20 | 3  | 21.15  | b6b10b13                       | 2366.16 | 99.029  | 1621   | 2 | 1183.58 | -5.06  |
| P02679 FIBG_HUMAN Fibrinogen gamma chain          | 29 | Oxidation+M(16)                             | AIQLTYNPDESSKPNMIDAATLK    | 88  | 23 | 3  | 13.04  | b7b13y8                        | 2536.23 | 100.107 | 105499 | 3 | 846.08  | -12.51 |
| P02679 FIBG_HUMAN Fibrinogen gamma chain          | 30 |                                             | GEGQQHHLGGAK               | 420 | 12 | 0  | 4.05   |                                | 1218.60 | 33.114  | 20050  | 2 | 609.80  | 3.91   |
| P02679 FIBG_HUMAN Fibrinogen gamma chain          | 31 |                                             | IGEGQQHHLGGAK              | 419 | 13 | 0  | 4.05   |                                | 1331.67 | 33.056  | 14965  | 3 | 444.56  | -10.27 |
| P02679 FIBG_HUMAN Fibrinogen gamma chain          | 32 |                                             | TIGEGQQHHLGGAK             | 418 | 14 | 0  | 4.05   |                                | 1432.72 | 33.030  | 14418  | 3 | 478.25  | -4.94  |
| P02679 FIBG_HUMAN Fibrinogen gamma chain          | 33 |                                             | ASILTHDSSIR                | 123 | 11 | 2  | 7.42   | b3*b3                          | 1199.62 | 49.630  | 4726   | 2 | 600.31  | -12.92 |
| P02679 FIBG_HUMAN Fibrinogen gamma chain          | 34 |                                             | DTVQIHIDIT                 | 166 | 9  | 0  | 5.67   |                                | 1041.51 | 59.944  | 4437   | 2 | 521.26  | -13.01 |
| P02679 FIBG_HUMAN Fibrinogen gamma chain          | 35 |                                             | QVRPEHPAETEDSL             | 432 | 15 | 1  | 7.65   | y9                             | 1770.82 | 92.650  | 3662   | 2 | 885.91  | -7.86  |
| P02679 FIBG_HUMAN Fibrinogen gamma chain          | 36 | Carbamidomethyl+C(3); Carbamidomethyl+C(7)  | SYCPTTCGIADFLSTYQTK        | 42  | 19 | 0  | 6.48   |                                | 2212.97 | 88.760  | 2257   | 2 | 1106.99 | -8.61  |
| P02679 FIBG_HUMAN Fibrinogen gamma chain          | 37 |                                             | PTGTTEFWLGNEK              | 245 | 13 | 2  | 21.04  | b11b12                         | 1479.70 | 77.287  | 1896   | 1 | 1479.70 | -6.27  |
| P02679 FIBG_HUMAN Fibrinogen gamma chain          | 38 |                                             | LTIGEGQQHHLGGAK            | 417 | 15 | 0  | 4.05   |                                | 1527.78 | 33.078  | 3244   | 4 | 382.70  | -10.63 |
| P00488 F13A_HUMAN Coagulation factor XIII A chain | 1  |                                             | AVPPNNSNAEEDDLPTVELQGVVPR  | 13  | 25 | 9  | 62.32  | b1b14*b14y3y4y5y6y7y25         | 2602.30 | 75.331  | 121112 | 3 | 868.10  | -4.60  |
| P00488 F13A_HUMAN Coagulation factor XIII A chain | 2  |                                             | LIAMSSDSLRL                | 705 | 11 | 13 | 110.55 | b2b3b9b10y1y3y6*y6y7y8y9y10y11 | 1179.61 | 50.510  | 117460 | 2 | 590.31  | 1.35   |

|                                                   |    |                       |                                              |     |    |    |        |                                                             |         |         |        |   |         |        |
|---------------------------------------------------|----|-----------------------|----------------------------------------------|-----|----|----|--------|-------------------------------------------------------------|---------|---------|--------|---|---------|--------|
| P00488 F13A_HUMAN Coagulation factor XIII A chain | 3  |                       | GTYPVPIVSELQSGK                              | 114 | 16 | 9  | 51.48  | b3°b3b4y3y4°y4y8y12y16                                      | 1687.93 | 84.388  | 107271 | 2 | 844.47  | 4.27   |
| P00488 F13A_HUMAN Coagulation factor XIII A chain | 4  |                       | STVLTIPEIIIK                                 | 624 | 12 | 13 | 97.75  | b2°b2b5°b5b6y2y4y6y7y8y9y10y12                              | 1326.82 | 89.060  | 89281  | 2 | 663.91  | -3.22  |
| P00488 F13A_HUMAN Coagulation factor XIII A chain | 5  |                       | MYVAVWTPYGVLR                                | 159 | 13 | 8  | 53.07  | b3b4b5y1y2y6y7y13                                           | 1554.82 | 91.215  | 79947  | 2 | 777.91  | 1.41   |
| P00488 F13A_HUMAN Coagulation factor XIII A chain | 6  |                       | KPLNTEGVMK                                   | 504 | 10 | 5  | 41.66  | y4y7y9*y9y10                                                | 1116.60 | 32.570  | 54270  | 2 | 558.81  | -3.94  |
| P00488 F13A_HUMAN Coagulation factor XIII A chain | 7  | Carbamidomethyl+C(1)  | CGPASVQAIK                                   | 409 | 10 | 7  | 43.12  | b2b3y1y6y7y8y10                                             | 1030.53 | 35.384  | 49739  | 2 | 515.77  | -0.12  |
| P00488 F13A_HUMAN Coagulation factor XIII A chain | 8  |                       | AQMDLSGR                                     | 245 | 8  | 8  | 33.07  | b1b2*b2b4°b4y3y4y8                                          | 877.41  | 31.302  | 44612  | 2 | 439.21  | -5.36  |
| P00488 F13A_HUMAN Coagulation factor XIII A chain | 9  | Carbamidomethyl+C(14) | NPETDITYILFNPWCEDDAVYLDNEKER                 | 175 | 27 | 5  | 11.9   | b2b7b12y6y27                                                | 3346.49 | 90.994  | 42636  | 3 | 1116.17 | 2.77   |
| P00488 F13A_HUMAN Coagulation factor XIII A chain | 10 |                       | LSIQSSPK                                     | 144 | 8  | 8  | 75.72  | b5y2y3y4y5y6y7y8                                            | 859.48  | 31.652  | 41590  | 2 | 430.24  | -8.10  |
| P00488 F13A_HUMAN Coagulation factor XIII A chain | 11 |                       | EAVLIQAGEYMGQLEQASLHFFVTAR                   | 585 | 27 | 16 | 81.62  | b2°b2b3°b3b4°b4b5y6y7y10y13y15y16*y16y20y27                 | 3021.56 | 136.690 | 32387  | 3 | 1007.86 | 2.34   |
| P00488 F13A_HUMAN Coagulation factor XIII A chain | 12 |                       | DGTHVVENVVDATHIGK                            | 447 | 16 | 10 | 63.9   | b4b5°b5b7b8y3y4y7°y7y16                                     | 1691.82 | 40.632  | 32042  | 3 | 564.61  | -6.06  |
| P00488 F13A_HUMAN Coagulation factor XIII A chain | 13 |                       | VGSAMVNAK                                    | 261 | 9  | 9  | 74.88  | b2b8y2y3y4y6y7y8y9                                          | 876.45  | 25.904  | 25509  | 2 | 438.73  | -8.08  |
| P00488 F13A_HUMAN Coagulation factor XIII A chain | 14 |                       | FQEQQEER                                     | 483 | 9  | 7  | 45.44  | b2b3y1y5y6y7y9                                              | 1151.50 | 21.398  | 18393  | 2 | 576.25  | 0.21   |
| P00488 F13A_HUMAN Coagulation factor XIII A chain | 15 | Carbamidomethyl+C(14) | EIRPNSTVQWEEVCRPWVSGHR                       | 682 | 22 | 5  | 24.21  | b8*b8y4y5y12                                                | 2722.34 | 61.259  | 8695   | 3 | 908.12  | 3.68   |
| P00488 F13A_HUMAN Coagulation factor XIII A chain | 16 |                       | EEYVLNDIGVIFYGEVNDIK                         | 202 | 20 | 4  | 19.74  | b9b16y4y15                                                  | 2329.13 | 80.314  | 5183   | 4 | 583.04  | -13.73 |
| P00488 F13A_HUMAN Coagulation factor XIII A chain | 17 | Carbamidomethyl+C(4)  | YGQCWVFAGVENTFLR                             | 311 | 16 | 4  | 39.82  | y3y7y8y9                                                    | 1964.96 | 114.548 | 19226  | 2 | 982.98  | 7.45   |
| P00488 F13A_HUMAN Coagulation factor XIII A chain | 18 |                       | QIGGDGMMDITDTYK                              | 468 | 15 | 3  | 24.15  | b6y7y8                                                      | 1644.71 | 30.207  | 14841  | 2 | 822.86  | -10.39 |
| P00488 F13A_HUMAN Coagulation factor XIII A chain | 19 |                       | HVYGELDVQIQR                                 | 716 | 12 | 4  | 22.26  | b5y9y11*y11                                                 | 1456.74 | 55.535  | 14439  | 2 | 728.87  | -8.13  |
| P00488 F13A_HUMAN Coagulation factor XIII A chain | 20 |                       | GQSFYVQIDFSRPYDPR                            | 79  | 17 | 4  | 16.3   | b5°b5b12y6                                                  | 2075.01 | 77.232  | 12233  | 2 | 1038.01 | 7.88   |
| P00488 F13A_HUMAN Coagulation factor XIII A chain | 21 |                       | SNVDMDFEVENAVLGK                             | 516 | 16 | 5  | 27.65  | b9y8*y8y10y15                                               | 1766.86 | 99.893  | 11706  | 2 | 883.93  | 19.48  |
| P00488 F13A_HUMAN Coagulation factor XIII A chain | 22 |                       | GVNLQEFLNVTSVHLFK                            | 38  | 17 | 6  | 27.38  | b10y3y4y13°y13*y13                                          | 1945.07 | 99.972  | 10186  | 2 | 973.04  | 8.16   |
| P00488 F13A_HUMAN Coagulation factor XIII A chain | 23 | Carbamidomethyl+C(8)  | DSVWNYHCWNEAWMTRPDLVPGFGGWQAVDSTPQENS DGM YR | 367 | 42 | 21 | 159.96 | b3°b3b4b7b12b19*b19b21b22b23b24y4y5y6y10*y10y11y12y13y14y15 | 4959.18 | 97.407  | 8326   | 3 | 1653.73 | 8.37   |
| P00488 F13A_HUMAN Coagulation factor XIII A chain | 24 |                       | DVLAK                                        | 617 | 5  | 1  | 13.21  | b3                                                          | 545.33  | 44.853  | 5836   | 1 | 545.33  | 1.01   |
| P00488 F13A_HUMAN Coagulation factor XIII A chain | 25 |                       | DDEGVLVGSDWNIYAYGVPPSAW TGSVDILLE YR         | 270 | 34 | 5  | 24.35  | b8b10°b10y13y14                                             | 3756.77 | 60.178  | 3540   | 3 | 1252.93 | -10.20 |
| P00488 F13A_HUMAN Coagulation factor XIII A chain | 26 |                       | GNPIKVSR                                     | 253 | 8  | 4  | 54.07  | y3y4y5y6                                                    | 870.51  | 24.877  | 19742  | 2 | 435.76  | -7.78  |
| P00488 F13A_HUMAN Coagulation factor XIII A chain | 27 | Carbamidomethyl+C(1)  | CIVGKFR                                      | 152 | 7  | 3  | 40.45  | b3b4b6                                                      | 879.49  | 37.873  | 15946  | 2 | 440.25  | 5.97   |
| P00488 F13A_HUMAN Coagulation factor XIII A chain | 28 |                       | RAVPPNNSNAEDDLPTVELQGVVPR                    | 12  | 26 | 3  | 22.8   | b3b14b15                                                    | 2758.43 | 70.822  | 7987   | 3 | 920.15  | 5.84   |
| P00488 F13A_HUMAN Coagulation factor XIII A chain | 29 |                       | LSITFRNNSHNR                                 | 535 | 12 | 3  | 32.47  | y4y7y9                                                      | 1458.75 | 88.733  | 7158   | 2 | 729.88  | -3.93  |
| P00488 F13A_HUMAN Coagulation factor XIII A chain | 30 |                       | RGQSFYVQIDFSRPYDPR                           | 78  | 18 | 3  | 15.57  | b10b12y10                                                   | 2231.10 | 81.254  | 5236   | 3 | 744.37  | 1.53   |

|                                                    |    |                       |                                |     |    |    |        |                                                   |         |         |       |   |         |        |
|----------------------------------------------------|----|-----------------------|--------------------------------|-----|----|----|--------|---------------------------------------------------|---------|---------|-------|---|---------|--------|
| [P00488]F13A_HUMAN Coagulation factor XIII A chain | 31 |                       | SETSRTAFGGR                    | 1   | 11 | 3  | 24.29  | b5b8y4                                            | 1168.56 | 53.562  | 1991  | 2 | 584.78  | -7.73  |
| [P00488]F13A_HUMAN Coagulation factor XIII A chain | 32 | Phosphoryl STY(16)    | GTQVVGSDMTVTVQFTNPLK           | 638 | 20 | 4  | 22.6   | b15y5y8y17                                        | 2202.03 | 58.825  | 5020  | 2 | 1101.52 | -5.43  |
| [P00488]F13A_HUMAN Coagulation factor XIII A chain | 33 | Phosphoryl STY(11)    | GVNLQEFLNVTSVHLFK              | 38  | 17 | 5  | 29.89  | b7°b7b11y4y5                                      | 2025.00 | 33.573  | 4461  | 3 | 675.67  | -7.29  |
| [P00488]F13A_HUMAN Coagulation factor XIII A chain | 34 |                       | VGSAMVNAK                      | 261 | 9  | 0  | 1.62   |                                                   | 859.44  | 25.892  | 1676  | 2 | 430.22  | 13.64  |
| [P06733]ENOA_HUMAN Alpha-enolase                   | 1  |                       | YISPDQLADLYK                   | 269 | 12 | 6  | 34.22  | b2b3y5y9y10y12                                    | 1425.73 | 73.485  | 79529 | 2 | 713.37  | 1.97   |
| [P06733]ENOA_HUMAN Alpha-enolase                   | 2  |                       | HIADLAGNSEVILPVPFNVINGGS HAGNK | 132 | 30 | 18 | 125.61 | b4b5b6b7b8b11b12*b12b13y7°y7y8°y8y10y15*y15y17y18 | 3011.55 | 84.826  | 74236 | 4 | 753.64  | -7.54  |
| [P06733]ENOA_HUMAN Alpha-enolase                   | 3  |                       | SFIKDYPVVSIEDPFDQDDWGAW QK     | 281 | 25 | 13 | 70.42  | b5b6b8b9b13y1y2*y2y6y7y8y12y25                    | 2985.40 | 95.527  | 50669 | 3 | 995.80  | 1.88   |
| [P06733]ENOA_HUMAN Alpha-enolase                   | 4  |                       | AAVPSGASTGIYEALELR             | 32  | 18 | 6  | 21.72  | b7b12°b12y7y15y18                                 | 1804.96 | 78.747  | 50224 | 2 | 902.98  | 6.09   |
| [P06733]ENOA_HUMAN Alpha-enolase                   | 5  |                       | LAMQEFMILPVGAAFR               | 162 | 17 | 10 | 91.7   | b5b6y2y4y5y6y7y8y9y17                             | 1908.00 | 100.410 | 48881 | 2 | 954.50  | 4.22   |
| [P06733]ENOA_HUMAN Alpha-enolase                   | 6  | Carbamidomethyl+C(14) | VNQIGSVTESLQACK                | 343 | 15 | 9  | 58.56  | b14b15y3y4y9*y9y10y11y15                          | 1633.82 | 54.587  | 45579 | 2 | 817.41  | -0.90  |
| [P06733]ENOA_HUMAN Alpha-enolase                   | 7  |                       | DATNVGDEGGFAPNILENKEGLEL LK    | 202 | 26 | 7  | 15.78  | b2b5b14y2y14y21y26                                | 2743.38 | 84.842  | 36579 | 3 | 915.13  | -0.09  |
| [P06733]ENOA_HUMAN Alpha-enolase                   | 8  |                       | IGAEVYHNLK                     | 183 | 10 | 4  | 41.66  | y3y5y7y10                                         | 1143.62 | 39.723  | 22343 | 2 | 572.31  | 2.78   |
| [P06733]ENOA_HUMAN Alpha-enolase                   | 9  |                       | DATNVGDEGGFAPNILENK            | 202 | 19 | 5  | 28.46  | b14b16y13*y13y14                                  | 1960.90 | 54.694  | 3965  | 2 | 980.95  | -11.70 |
| [P06733]ENOA_HUMAN Alpha-enolase                   | 10 |                       | DYPVVSIEDPFDQDDWGAWQK          | 285 | 21 | 5  | 38.18  | b5b6b12y12y13                                     | 2510.13 | 75.486  | 2680  | 3 | 837.38  | 7.10   |
| [P06733]ENOA_HUMAN Alpha-enolase                   | 11 |                       | LAQANGWGMVSHR                  | 358 | 14 | 12 | 129.74 | b5*b5b9b10y3y4y5y6y7y9y10y11                      | 1525.74 | 55.418  | 45279 | 3 | 509.25  | -20.40 |
| [P06733]ENOA_HUMAN Alpha-enolase                   | 12 |                       | TIAPALVSK                      | 71  | 9  | 3  | 38.25  | y4y6y7                                            | 899.55  | 44.767  | 37564 | 2 | 450.28  | -9.16  |
| [P06733]ENOA_HUMAN Alpha-enolase                   | 13 |                       | IEEELGSK                       | 412 | 8  | 3  | 33.07  | b3y5y6                                            | 904.46  | 28.604  | 22682 | 2 | 452.73  | -3.91  |
| [P06733]ENOA_HUMAN Alpha-enolase                   | 14 |                       | FTASAGIQVVGDDLTVTNPK           | 306 | 20 | 10 | 37.57  | b5°b5b6b13°b13b15*b15y7y9°y9                      | 2033.09 | 93.351  | 10375 | 2 | 1017.05 | 19.03  |
| [P06733]ENOA_HUMAN Alpha-enolase                   | 15 |                       | EIFDSR                         | 9   | 6  | 1  | 13.62  | y3                                                | 766.38  | 30.591  | 5283  | 1 | 766.38  | 7.73   |
| [P06733]ENOA_HUMAN Alpha-enolase                   | 16 |                       | GNPTVEVDLFTSK                  | 15  | 13 | 7  | 53.28  | b9°b9y6y8°y8y10y12                                | 1406.73 | 57.071  | 4122  | 2 | 703.87  | 12.67  |
| [P06733]ENOA_HUMAN Alpha-enolase                   | 17 | Carbamidomethyl+C(5)  | TGAPCR                         | 394 | 6  | 1  | 13.62  | y4                                                | 661.32  | 101.292 | 3211  | 1 | 661.32  | 14.86  |
| [P06733]ENOA_HUMAN Alpha-enolase                   | 18 |                       | VVIGMDVAASEFFR                 | 239 | 14 | 9  | 59.12  | b7°b7b8°b8y3y5°y5y6y7                             | 1540.76 | 136.491 | 2992  | 1 | 1540.76 | -17.19 |
| [P06733]ENOA_HUMAN Alpha-enolase                   | 19 |                       | YDLDFKSPDDPSR                  | 256 | 13 | 4  | 32.29  | b5b6b11y9                                         | 1554.71 | 59.911  | 45388 | 2 | 777.86  | 0.08   |
| [P06733]ENOA_HUMAN Alpha-enolase                   | 20 |                       | SPDDPSRYISPDQLADLYK            | 262 | 19 | 3  | 14.93  | b9y8y17                                           | 2180.06 | 66.070  | 7600  | 3 | 727.36  | 3.14   |
| [P06733]ENOA_HUMAN Alpha-enolase                   | 21 |                       | SGKYDLDFK                      | 253 | 9  | 4  | 44.93  | b7b8y5y7                                          | 1072.53 | 47.177  | 3957  | 2 | 536.77  | -2.73  |
| [P06733]ENOA_HUMAN Alpha-enolase                   | 22 | Phosphoryl STY(15)    | FTASAGIQVVGDDLTVTNPKR          | 306 | 21 | 5  | 27.36  | b5b13y7y8°y8                                      | 2269.11 | 47.190  | 3295  | 3 | 757.04  | 0.22   |
| [P06733]ENOA_HUMAN Alpha-enolase                   | 23 |                       | NSEVILPVPFNVINGGSHAGNK         | 139 | 23 | 1  | 9.36   | b4                                                | 2334.21 | 84.773  | 6185  | 3 | 778.74  | -6.07  |
| [P06733]ENOA_HUMAN Alpha-enolase                   | 24 |                       | HIADLAGNSEVILPVPFNVINGGS HAGN  | 132 | 29 | 1  | 9.36   | y15                                               | 2883.49 | 84.878  | 3898  | 4 | 721.63  | 5.42   |



|                                             |    |                                      |                                     |     |    |    |        |                                                                               |         |         |        |   |         |        |
|---------------------------------------------|----|--------------------------------------|-------------------------------------|-----|----|----|--------|-------------------------------------------------------------------------------|---------|---------|--------|---|---------|--------|
| Q15404 RSU1_HUMAN Ras suppressor protein 1  | 1  |                                      | AENNPWVTPIADQFQLGVSHVFEYIR          | 212 | 26 | 16 | 86.95  | b2b4*b4b7*b7y3y4y5y6y8y10y18y19y22y26                                         | 3030.52 | 113.436 | 53863  | 3 | 1010.85 | 3.87   |
| Q15404 RSU1_HUMAN Ras suppressor protein 1  | 2  |                                      | LTVLPPELGNLDTLGQK                   | 191 | 17 | 6  | 23.29  | b2*b2b3*b3b4y13                                                               | 1808.03 | 86.798  | 47727  | 2 | 904.52  | 6.08   |
| Q15404 RSU1_HUMAN Ras suppressor protein 1  | 3  |                                      | GFGSLPALEVLDLTYNNLSSENSLPGNFFYLTTLR | 103 | 34 | 16 | 72.41  | b2b3b4*b4b5*b5b8b12y1y2y3y5y6y7y11y13                                         | 3775.94 | 134.439 | 26751  | 3 | 1259.32 | 4.46   |
| Q15404 RSU1_HUMAN Ras suppressor protein 1  | 4  |                                      | NLEVLNFFNNQIEELPTQISSLQK            | 63  | 24 | 12 | 64.41  | b2*b2b3b4y2y3y4y5*y5y6y9y24                                                   | 2818.46 | 108.995 | 24204  | 3 | 940.16  | -0.78  |
| Q15404 RSU1_HUMAN Ras suppressor protein 1  | 5  |                                      | GISNMLDVNGLFTLSHITQLVLSHNK          | 25  | 26 | 6  | 22.79  | b4*b4y3*y3y4y12                                                               | 2851.50 | 113.313 | 56657  | 4 | 713.63  | -6.25  |
| Q15404 RSU1_HUMAN Ras suppressor protein 1  | 6  |                                      | HMQANPEPPK                          | 248 | 10 | 4  | 26.89  | b9y6*y6y9                                                                     | 1148.55 | 105.113 | 4191   | 1 | 1148.55 | -0.96  |
| P10720 PF4V_HUMAN Platelet factor 4 variant | 1  |                                      | HITSLEVIK                           | 56  | 9  | 14 | 91.1   | b1b2b4*b4b5*b5b6b7y1y2y4y7y8y9                                                | 1039.61 | 48.427  | 363159 | 2 | 520.31  | -6.22  |
| P10720 PF4V_HUMAN Platelet factor 4 variant | 2  | Carbamidomethyl+C(5)                 | AGPHCPTAQLIATLK                     | 65  | 15 | 10 | 88.95  | b4b5b8b9b14y3y4y5y11y15                                                       | 1577.82 | 61.194  | 283295 | 3 | 526.61  | -14.70 |
| P10720 PF4V_HUMAN Platelet factor 4 variant | 3  |                                      | SSAAR                               | 1   | 5  | 2  | 13.21  | y4*y4                                                                         | 491.26  | 28.248  | 14868  | 1 | 491.26  | 7.64   |
| P68371 TBB2C_HUMAN Tubulin beta-2C chain    | 1  |                                      | LAVNMVPPFR                          | 252 | 10 | 12 | 99.95  | b2b3b5y1y4y5y6y7*y7y8y9y10                                                    | 1143.63 | 72.920  | 246238 | 2 | 572.32  | -1.81  |
| P68371 TBB2C_HUMAN Tubulin beta-2C chain    | 2  |                                      | SGPFGQIFRPDNFVFGQSGAGNNWAK          | 77  | 26 | 14 | 52.78  | b2b5b7*b7*b7b13b15y1y3y6y8y9y12y26                                            | 2798.35 | 89.960  | 186213 | 3 | 933.45  | 1.40   |
| P68371 TBB2C_HUMAN Tubulin beta-2C chain    | 3  |                                      | IMNTFSVVPSPK                        | 162 | 12 | 8  | 68.89  | b10y4*y4y7y8y9y11y12                                                          | 1319.70 | 63.948  | 105530 | 2 | 660.36  | 1.57   |
| P68371 TBB2C_HUMAN Tubulin beta-2C chain    | 4  | Carbamidomethyl+C(23)                | LTTPTYGDLNHLVVSATMSGVTTC LR         | 216 | 25 | 9  | 74.47  | y3y5y6y7y8y12y13y22y25                                                        | 2708.34 | 95.649  | 85886  | 3 | 903.45  | 0.18   |
| P68371 TBB2C_HUMAN Tubulin beta-2C chain    | 5  |                                      | AVLVDLEPGTMDSVR                     | 62  | 15 | 8  | 29.42  | b1b2b3y2y8y9y11y15                                                            | 1601.82 | 71.150  | 50258  | 2 | 801.41  | -2.97  |
| P68371 TBB2C_HUMAN Tubulin beta-2C chain    | 6  |                                      | LHFFMPGFAPLTSR                      | 262 | 14 | 9  | 79.14  | b2b3b4b8b9b13y3y5y12                                                          | 1620.81 | 89.791  | 44064  | 3 | 540.94  | -14.46 |
| P68371 TBB2C_HUMAN Tubulin beta-2C chain    | 7  |                                      | ALTVPELTQQMFDAK                     | 282 | 15 | 8  | 62.33  | y1y3y5*y5y7y9y11y15                                                           | 1691.87 | 86.070  | 31987  | 2 | 846.44  | 3.25   |
| P68371 TBB2C_HUMAN Tubulin beta-2C chain    | 8  |                                      | IREEYPDR                            | 154 | 8  | 6  | 36.08  | b2b4b7y1y3y8                                                                  | 1077.53 | 25.572  | 26155  | 2 | 539.27  | -3.40  |
| P68371 TBB2C_HUMAN Tubulin beta-2C chain    | 9  |                                      | MSATFIGNSTAIQELFK                   | 362 | 17 | 6  | 46.45  | b7b9*b9b13b14b16                                                              | 1857.95 | 93.357  | 5352   | 2 | 929.48  | 4.07   |
| P68371 TBB2C_HUMAN Tubulin beta-2C chain    | 10 |                                      | MSATFIGNSTAIQELFKR                  | 362 | 18 | 4  | 22.73  | b7b12*b12b16                                                                  | 2014.04 | 71.913  | 3284   | 2 | 1007.52 | -3.52  |
| P68371 TBB2C_HUMAN Tubulin beta-2C chain    | 11 |                                      | GSQQYRALTVPELTQQMFDAK               | 276 | 21 | 3  | 13.86  | b9b19y4                                                                       | 2411.17 | 59.540  | 73475  | 3 | 804.40  | -12.56 |
| P68371 TBB2C_HUMAN Tubulin beta-2C chain    | 12 | Carbamidomethyl+C(12);Oxidation+M(1) | MREIVHLQAGQCGNQIGAK                 | 0   | 19 | 4  | 38.11  | y9y10y11y14                                                                   | 2126.07 | 66.100  | 22540  | 3 | 709.36  | 5.05   |
| P23528 COF1_HUMAN Cofilin-1                 | 1  |                                      | KEDLVFIFWAPESAPLK                   | 95  | 17 | 10 | 83.08  | b5b6b7y3y6y7*y7y8y9y17                                                        | 1990.06 | 97.812  | 244321 | 3 | 664.02  | -6.56  |
| P23528 COF1_HUMAN Cofilin-1                 | 2  |                                      | EILVGDVGQTVDDPYATFVK                | 53  | 20 | 29 | 219.3  | b2*b2b3*b3b4*b4b6*b6b7b13b14b16*b16y1y2y3y4y5y7y8y10y11y12y14y15y16*y16y17y20 | 2166.11 | 81.405  | 149877 | 2 | 1083.56 | 6.76   |
| P23528 COF1_HUMAN Cofilin-1                 | 3  |                                      | YALYDATYETK                         | 81  | 11 | 12 | 110.55 | b2b3b4b6y2y5y6y7y8y9y10y11                                                    | 1337.62 | 52.883  | 117205 | 2 | 669.32  | -1.19  |
| P23528 COF1_HUMAN Cofilin-1                 | 4  |                                      | NIILEEGK                            | 45  | 8  | 8  | 40.85  | b1*b1y2y3*y3y5y6y8                                                            | 915.51  | 44.768  | 73842  | 2 | 458.26  | -6.67  |
| P23528 COF1_HUMAN Cofilin-1                 | 5  | Carbamidomethyl+C(7)                 | MLPKDKCR                            | 73  | 8  | 6  | 54.07  | b2y2y3y4y5y6                                                                  | 1034.47 | 22.110  | 18365  | 2 | 517.74  | -2.01  |

|                                               |    |                       |                                      |     |    |    |        |                                                |         |         |        |   |        |        |
|-----------------------------------------------|----|-----------------------|--------------------------------------|-----|----|----|--------|------------------------------------------------|---------|---------|--------|---|--------|--------|
| IP23528 COF1_HUMAN Cofilin-1                  | 6  |                       | MIYASSKDAIK                          | 114 | 11 | 5  | 24.29  | b5°b5b8y2y3                                    | 1226.64 | 32.069  | 2869   | 3 | 409.55 | -1.69  |
| IP23528 COF1_HUMAN Cofilin-1                  | 7  | Carbamidomethyl+C(1)  | CTLAEK                               | 146 | 6  | 2  | 13.62  | y4°y4                                          | 721.36  | 57.069  | 3100   | 1 | 721.36 | 8.29   |
| IP23528 COF1_HUMAN Cofilin-1                  | 8  |                       | MIYASSKDAIK                          | 114 | 11 | 4  | 47.5   | b4b5b6b10                                      | 1226.65 | 59.541  | 185190 | 2 | 613.83 | 5.47   |
| IP23528 COF1_HUMAN Cofilin-1                  | 9  | Carbamidomethyl+C(2)  | DCRYALYDATYETK                       | 78  | 14 | 3  | 19.27  | b3y7y9                                         | 1768.78 | 92.642  | 12683  | 3 | 590.26 | -3.24  |
| IP23528 COF1_HUMAN Cofilin-1                  | 10 |                       | ASGVAVSDGVKIVFNDMK                   | 1   | 18 | 3  | 15.57  | b3y3y6                                         | 1836.94 | 84.234  | 2376   | 2 | 918.98 | -4.12  |
| IP23528 COF1_HUMAN Cofilin-1                  | 11 |                       | EILVGDVGQTVDD                        | 53  | 13 | 0  | 6.07   |                                                | 1359.65 | 81.389  | 3025   | 2 | 680.33 | -9.61  |
| IP07437 TBB5_HUMAN Tubulin beta chain         | 1  |                       | LAVNMVPPFR                           | 252 | 10 | 12 | 99.95  | b2b3b5y1y4y5y6y7*y7y8y9y10                     | 1143.63 | 72.920  | 246238 | 2 | 572.32 | -1.81  |
| IP07437 TBB5_HUMAN Tubulin beta chain         | 2  |                       | SGPFGQIFRPDNFVFGQSGAGNNWAK           | 77  | 26 | 14 | 52.78  | b2b5b7°b7°b7b13b15y1y3y6y8y9y12y26             | 2798.35 | 89.960  | 186213 | 3 | 933.45 | 1.40   |
| IP07437 TBB5_HUMAN Tubulin beta chain         | 3  |                       | ALTVPELTQQVFDKAK                     | 282 | 15 | 5  | 36.69  | y4y7y11y12y15                                  | 1659.90 | 84.421  | 127520 | 2 | 830.45 | 3.60   |
| IP07437 TBB5_HUMAN Tubulin beta chain         | 4  |                       | IMNTFSVVPSPK                         | 162 | 12 | 8  | 68.89  | b10y4°y4y7y8y9y11y12                           | 1319.70 | 63.948  | 105530 | 2 | 660.36 | 1.57   |
| IP07437 TBB5_HUMAN Tubulin beta chain         | 5  | Carbamidomethyl+C(23) | LTTPTYGDLNHLVVSATMSGVTTC LR          | 216 | 25 | 9  | 74.47  | y3y5y6y7y8y12y13y22y25                         | 2708.34 | 95.649  | 85886  | 3 | 903.45 | 0.18   |
| IP07437 TBB5_HUMAN Tubulin beta chain         | 6  |                       | MAVTFIGNSTAIQELFKR                   | 362 | 18 | 8  | 15.57  | b1b3y1y2y12°y12y15y18                          | 2026.06 | 91.251  | 54750  | 3 | 676.03 | -8.07  |
| IP07437 TBB5_HUMAN Tubulin beta chain         | 7  |                       | ISVYYNEATGGK                         | 46  | 12 | 11 | 65.88  | b6°b6°b6y1y3y7*y7y8y9y10y12                    | 1301.64 | 45.225  | 44103  | 2 | 651.32 | 1.50   |
| IP07437 TBB5_HUMAN Tubulin beta chain         | 8  |                       | LHFFMPGFAPLTSR                       | 262 | 14 | 9  | 79.14  | b2b3b4b8b9b13y3y5y12                           | 1620.81 | 89.791  | 44064  | 3 | 540.94 | -14.46 |
| IP07437 TBB5_HUMAN Tubulin beta chain         | 9  |                       | IREEYPDR                             | 154 | 8  | 6  | 36.08  | b2b4b7y1y3y8                                   | 1077.53 | 25.572  | 26155  | 2 | 539.27 | -3.40  |
| IP07437 TBB5_HUMAN Tubulin beta chain         | 10 |                       | MAVTFIGNSTAIQELFK                    | 362 | 17 | 4  | 16.3   | b5b8y5y17                                      | 1869.99 | 98.614  | 7711   | 2 | 935.50 | 8.62   |
| IP60660 MYL6_HUMAN Myosin light polypeptide 6 | 1  |                       | VLDFEHFLPMLQTVAK                     | 63  | 16 | 15 | 125.48 | b2b6b8y2y3y4y5y6y8y9y10y14y15y16*y16           | 1887.98 | 102.209 | 265014 | 3 | 630.00 | -10.02 |
| IP60660 MYL6_HUMAN Myosin light polypeptide 6 | 2  |                       | ALGQNPTNAEVLK                        | 37  | 13 | 14 | 98.35  | b2b3b4b5°b5b11*b11y1y5y7y8y9y11y13             | 1354.73 | 45.357  | 139460 | 2 | 677.87 | -1.89  |
| IP60660 MYL6_HUMAN Myosin light polypeptide 6 | 3  |                       | EAFLQFDR                             | 13  | 8  | 10 | 54.07  | y1y2y3°y3y4y5y6°y6*y6y8                        | 1025.50 | 69.004  | 98712  | 2 | 513.25 | -6.31  |
| IP60660 MYL6_HUMAN Myosin light polypeptide 6 | 4  | Carbamidomethyl+C(6)  | ILYSQCGDVMR                          | 26  | 11 | 12 | 65.48  | b2y2y3y6y7*y7y8°y8y9*y9y11*y11                 | 1341.63 | 48.940  | 94219  | 2 | 671.32 | 2.46   |
| IP60660 MYL6_HUMAN Myosin light polypeptide 6 | 5  |                       | EGNGTVMGAEIR                         | 98  | 12 | 6  | 32.47  | y5y7°y7y11°y11*y11                             | 1233.59 | 43.839  | 21132  | 2 | 617.30 | 3.17   |
| IP60660 MYL6_HUMAN Myosin light polypeptide 6 | 6  | Carbamidomethyl+C(28) | HVLVTLGKEMTEEEVEMLVAGHEDSNGCINYEAFVR | 110 | 36 | 4  | 10.89  | b14y7°y7y12                                    | 4105.97 | 79.148  | 101239 | 5 | 822.00 | 8.68   |
| IP60660 MYL6_HUMAN Myosin light polypeptide 6 | 7  |                       | VFDKEGNGTVMGAEIR                     | 94  | 16 | 3  | 23.68  | b3y5y6                                         | 1722.84 | 50.055  | 59552  | 3 | 574.95 | -4.61  |
| IP60660 MYL6_HUMAN Myosin light polypeptide 6 | 8  |                       | VLGNPKSDEMNVK                        | 50  | 13 | 3  | 20.63  | b9b11y8                                        | 1430.75 | 76.125  | 24054  | 2 | 715.88 | 14.33  |
| IP60660 MYL6_HUMAN Myosin light polypeptide 6 | 9  |                       | EAFLQFDRDTGDGK                       | 13  | 13 | 7  | 61.73  | b3b6b9y6y7°y7y8                                | 1483.71 | 55.423  | 8226   | 3 | 495.24 | -6.99  |
| IP60660 MYL6_HUMAN Myosin light polypeptide 6 | 10 |                       | PMLQTVAK                             | 71  | 8  | 2  | 20.88  | b3b4                                           | 887.49  | 102.221 | 2520   | 2 | 444.25 | -11.69 |
| IP60660 MYL6_HUMAN Myosin light polypeptide 6 | 11 |                       | EAFLQFDR                             | 13  | 8  | 0  | 1.21   |                                                | 1007.50 | 68.969  | 8900   | 2 | 504.25 | 5.63   |
| IP12814 ACTN1_HUMAN Alpha-actinin-1           | 1  |                       | VGWEQLLTIAR                          | 714 | 12 | 20 | 166.82 | b3b4b5°b5b6°b6b8y1y2y3y4y5y6y7y8y9°y9*y9y11y12 | 1386.78 | 98.077  | 257871 | 2 | 693.89 | 1.32   |

|                                    |    |                       |                                          |     |    |    |        |                                                                              |         |         |        |   |         |        |
|------------------------------------|----|-----------------------|------------------------------------------|-----|----|----|--------|------------------------------------------------------------------------------|---------|---------|--------|---|---------|--------|
| P12814 ACTN1_HUMAN Alpha-actinin-1 | 2  |                       | AIMTYVSSFYHAFSGAQK                       | 236 | 18 | 28 | 205.87 | b2b3b5°b5b8°b8b13b15y1y2*y2y4y5y6y7y8y9y10°y10y11y12*y12y13y14°y14y16y18*y18 | 2007.95 | 90.556  | 170967 | 3 | 669.99  | -7.11  |
| P12814 ACTN1_HUMAN Alpha-actinin-1 | 3  |                       | MLDAEDIVGTARPDEK                         | 220 | 16 | 7  | 28.32  | b2b11°b11y10y11y14y16                                                        | 1759.83 | 60.452  | 158187 | 3 | 587.28  | -10.96 |
| P12814 ACTN1_HUMAN Alpha-actinin-1 | 4  |                       | VEQIAAIAQELNELDYDPSVNA<br>R              | 450 | 25 | 24 | 162.65 | b2b3b4b5b6b7b13y3*y3y4*y4y5y6*y6y7y8y10y12*y12y14*y14y22*y22y25              | 2808.40 | 94.625  | 136499 | 3 | 936.80  | 10.43  |
| P12814 ACTN1_HUMAN Alpha-actinin-1 | 5  |                       | VLAVNQENEQLMEDYEK                        | 264 | 17 | 13 | 90.26  | b2b3b4b11b12b14°b14y6y8y9y11y14y17                                           | 2051.97 | 61.903  | 124382 | 2 | 1026.49 | 5.71   |
| P12814 ACTN1_HUMAN Alpha-actinin-1 | 6  | Carbamidomethyl+C(2)  | ICDQWDNLGALTQK                           | 478 | 14 | 11 | 78.81  | b2b3y2y3y4y6y7y9y12°y12y14                                                   | 1661.79 | 70.163  | 122037 | 2 | 831.40  | -2.72  |
| P12814 ACTN1_HUMAN Alpha-actinin-1 | 7  |                       | TINEVENQILTR                             | 726 | 12 | 7  | 49.66  | b3y1y3y4y6y10y12                                                             | 1429.76 | 60.151  | 107053 | 2 | 715.39  | -0.17  |
| P12814 ACTN1_HUMAN Alpha-actinin-1 | 8  |                       | LASDLLEWIR                               | 281 | 10 | 5  | 33.88  | y2y3y4y8y10                                                                  | 1215.66 | 92.134  | 104666 | 2 | 608.34  | -7.93  |
| P12814 ACTN1_HUMAN Alpha-actinin-1 | 9  |                       | LLETIDQLYLEYAK                           | 502 | 14 | 13 | 88.35  | b2y1y2y3y4y5y6y9y10y11*y11y12°y14                                            | 1711.92 | 91.434  | 92009  | 2 | 856.46  | 2.35   |
| P12814 ACTN1_HUMAN Alpha-actinin-1 | 10 |                       | QFGAQANVIGPWQTK                          | 633 | 16 | 5  | 24.24  | b4b7y7y14y16                                                                 | 1757.94 | 76.263  | 87135  | 2 | 879.47  | 1.25   |
| P12814 ACTN1_HUMAN Alpha-actinin-1 | 11 |                       | LSNRPAFMPSEGR                            | 346 | 13 | 10 | 81.26  | b4b5b6b7b8°b8y2y4y5y13                                                       | 1461.71 | 45.639  | 86835  | 3 | 487.91  | -9.77  |
| P12814 ACTN1_HUMAN Alpha-actinin-1 | 12 | Carbamidomethyl+C(11) | MVSDINNAWGCLEQVEK                        | 359 | 17 | 14 | 111.63 | b5b9b15y4y5y7y8y9y10°y10*y10y11y15y17                                        | 1992.93 | 76.531  | 86450  | 2 | 996.97  | 5.15   |
| P12814 ACTN1_HUMAN Alpha-actinin-1 | 13 |                       | LLETIDQLYLEYAKR                          | 502 | 15 | 11 | 65.55  | b2y1y5°y5y6y7y9y10°y10y13y15                                                 | 1868.00 | 85.960  | 86282  | 3 | 623.34  | -9.48  |
| P12814 ACTN1_HUMAN Alpha-actinin-1 | 14 |                       | IDQLEGDHQLIQEALIFDNK                     | 684 | 20 | 5  | 41.41  | b3b11y3y4y5                                                                  | 2339.18 | 82.319  | 84356  | 3 | 780.40  | -3.86  |
| P12814 ACTN1_HUMAN Alpha-actinin-1 | 15 |                       | AAPFNWMEGAMEDLQDTFIVHT<br>IEEQGLTTAHEQFK | 517 | 38 | 20 | 124.34 | b2b3b5b6°b6b7°b7y3y4y5°y5y6y7y8y10y17y21y23y36y38                            | 4362.03 | 136.213 | 70682  | 4 | 1091.26 | -3.69  |
| P12814 ACTN1_HUMAN Alpha-actinin-1 | 16 |                       | ALDFIASK                                 | 95  | 8  | 5  | 33.07  | b3b4y2y5y8                                                                   | 864.48  | 55.593  | 64485  | 2 | 432.74  | -6.50  |
| P12814 ACTN1_HUMAN Alpha-actinin-1 | 17 | Carbamidomethyl+C(1)  | CQLEINFNTLQTK                            | 331 | 13 | 6  | 25.4   | b2°b2b3y9y10y13                                                              | 1608.81 | 70.416  | 48869  | 2 | 804.91  | 3.72   |
| P12814 ACTN1_HUMAN Alpha-actinin-1 | 18 |                       | IVQTYHVNMGATNPYTTITPQEIN<br>GK           | 577 | 26 | 6  | 25.56  | b13b19y7y8*y8y26                                                             | 2890.43 | 64.451  | 38468  | 3 | 964.15  | -1.94  |
| P12814 ACTN1_HUMAN Alpha-actinin-1 | 19 |                       | ATLPDADKER                               | 555 | 10 | 7  | 51.87  | y1y2y3y4y5y7y10                                                              | 1115.57 | 26.352  | 29438  | 2 | 558.29  | -2.74  |
| P12814 ACTN1_HUMAN Alpha-actinin-1 | 20 |                       | DQALTEEHAR                               | 614 | 10 | 13 | 99.95  | b2°b2b3°b3b5y2y3y4y5°y5y6y7y8                                                | 1169.55 | 21.347  | 6847   | 2 | 585.28  | -1.98  |
| P12814 ACTN1_HUMAN Alpha-actinin-1 | 21 |                       | ASIHEAWTDGK                              | 402 | 11 | 5  | 24.29  | b5°b5b8°b8y5                                                                 | 1214.58 | 27.787  | 5674   | 2 | 607.79  | -0.90  |
| P12814 ACTN1_HUMAN Alpha-actinin-1 | 22 |                       | VPENTMHAMQQK                             | 300 | 12 | 4  | 22.26  | b9°b9y7y9                                                                    | 1413.65 | 26.018  | 2014   | 4 | 354.17  | -8.12  |
| P12814 ACTN1_HUMAN Alpha-actinin-1 | 23 |                       | DDPLTNLNTAFDVAEK                         | 198 | 16 | 5  | 24.24  | b7°b7b12y8y12                                                                | 1762.84 | 52.852  | 1924   | 2 | 881.92  | -4.99  |
| P12814 ACTN1_HUMAN Alpha-actinin-1 | 24 |                       | LAILGIHNEVSK                             | 565 | 12 | 6  | 52.67  | b3y5y6y8*y8y9                                                                | 1293.73 | 58.550  | 120639 | 3 | 431.92  | -16.70 |
| P12814 ACTN1_HUMAN Alpha-actinin-1 | 25 |                       | MAPYTGPDSPGALDYMSFSTAL<br>YGESDL         | 863 | 29 | 3  | 11.52  | b11b23y14                                                                    | 3055.40 | 118.571 | 80752  | 4 | 764.61  | 14.54  |

|                                    |    |                                           |                                     |     |    |    |        |                                         |         |         |         |   |         |        |
|------------------------------------|----|-------------------------------------------|-------------------------------------|-----|----|----|--------|-----------------------------------------|---------|---------|---------|---|---------|--------|
| P12814 ACTN1_HUMAN Alpha-actinin-1 | 26 | Carbamidomethyl+C(2)                      | ACLISLGYDIGNDPQGEAEFAR              | 772 | 22 | 3  | 13.43  | b6b17y7                                 | 2396.16 | 81.689  | 13542   | 3 | 799.39  | 16.61  |
| P12814 ACTN1_HUMAN Alpha-actinin-1 | 27 |                                           | AGTQIENIEEDFR                       | 47  | 13 | 8  | 59.29  | b4b5b9b10y9y11°y11*y11                  | 1521.74 | 54.268  | 10588   | 3 | 507.92  | 17.01  |
| P12814 ACTN1_HUMAN Alpha-actinin-1 | 28 |                                           | TIPWLENR                            | 292 | 8  | 5  | 49.3   | b7°b7y3y4y7                             | 1028.56 | 31.036  | 3384    | 3 | 343.52  | 3.32   |
| P12814 ACTN1_HUMAN Alpha-actinin-1 | 29 |                                           | QQHNER                              | 624 | 6  | 1  | 13.62  | b5                                      | 811.38  | 35.562  | 2236    | 2 | 406.20  | 3.91   |
| P12814 ACTN1_HUMAN Alpha-actinin-1 | 30 |                                           | DDPLTNLNTAFDVAEKYLDIPK              | 198 | 22 | 6  | 30.26  | b8b13b14°b14b21y3                       | 2492.26 | 100.056 | 1183922 | 3 | 831.42  | 0.98   |
| P12814 ACTN1_HUMAN Alpha-actinin-1 | 31 |                                           | IDQLEGDHQLIQEALIFDNKHTNY<br>TMEHIR  | 684 | 30 | 10 | 57.11  | b3b9b13y3y4y5y9°y9*y9y10                | 3621.73 | 76.404  | 137052  | 5 | 725.15  | -11.86 |
| P12814 ACTN1_HUMAN Alpha-actinin-1 | 32 |                                           | VLAVNQENEQLMEDYEKLASDLL<br>EWIR     | 264 | 27 | 4  | 35.32  | b8b9y3y4                                | 3248.58 | 85.981  | 118869  | 4 | 812.90  | -9.62  |
| P12814 ACTN1_HUMAN Alpha-actinin-1 | 33 |                                           | IVQTYHVNMMAGTNPYTITPQEIN<br>GKWDHVR | 577 | 31 | 15 | 115.21 | b8b9°b9*b9b10b11b12y3y4y5y7y12y13y16y18 | 3583.73 | 68.051  | 112361  | 5 | 717.55  | -12.06 |
| P12814 ACTN1_HUMAN Alpha-actinin-1 | 34 |                                           | TIPWLENRVPENTMHAMQOK                | 292 | 20 | 4  | 19.74  | b7b19y9y18                              | 2423.16 | 68.282  | 105593  | 4 | 606.55  | -12.90 |
| P12814 ACTN1_HUMAN Alpha-actinin-1 | 35 |                                           | ILAGDKNYITMDELK                     | 834 | 15 | 4  | 25.77  | b4b8y6y8                                | 1751.88 | 63.092  | 66569   | 3 | 584.63  | -10.10 |
| P12814 ACTN1_HUMAN Alpha-actinin-1 | 36 |                                           | RDQALTEEHAR                         | 613 | 11 | 5  | 52.93  | b3b4b5b7y6                              | 1325.64 | 17.714  | 37279   | 3 | 442.55  | -12.62 |
| P12814 ACTN1_HUMAN Alpha-actinin-1 | 37 | Carbamidomethyl+C(24)                     | LSNRPAFMPSEGRMVSDINNAWG<br>CLEQVEK  | 346 | 30 | 7  | 24.74  | b10b13*b13y9°y9y10y12                   | 3435.63 | 87.336  | 10099   | 3 | 1145.88 | 1.21   |
| P12814 ACTN1_HUMAN Alpha-actinin-1 | 38 |                                           | DQALTEEHARQQHNER                    | 614 | 16 | 4  | 17.15  | b9y4y6*y6                               | 1961.90 | 54.464  | 8912    | 4 | 491.23  | -8.90  |
| P12814 ACTN1_HUMAN Alpha-actinin-1 | 39 |                                           | KHEAFESDLAAHQDR                     | 435 | 15 | 5  | 43.09  | b4b5y4y11y12                            | 1753.84 | 57.002  | 4193    | 3 | 585.28  | 6.82   |
| P12814 ACTN1_HUMAN Alpha-actinin-1 | 40 | Carbamidomethyl+C(11)                     | MVSDINNAWGCLQVEKGYEEW<br>LLNEIR     | 359 | 28 | 4  | 11.7   | b3b5°b5y11                              | 3395.62 | 122.346 | 4025    | 3 | 1132.54 | 4.03   |
| P12814 ACTN1_HUMAN Alpha-actinin-1 | 41 |                                           | IMSIVDPNRLGVVTFQAFIDFMSR            | 794 | 24 | 3  | 19.01  | y5y10y13                                | 2756.43 | 128.534 | 2854    | 3 | 919.48  | 1.42   |
| P12814 ACTN1_HUMAN Alpha-actinin-1 | 42 |                                           | TAPYKNVNIQNFHISWK                   | 157 | 17 | 3  | 23.29  | b13y8y9                                 | 2060.05 | 68.150  | 2742    | 2 | 1030.53 | -9.60  |
| P12814 ACTN1_HUMAN Alpha-actinin-1 | 43 |                                           | ASFNHFRDRHSGTLGPEEFK                | 752 | 20 | 6  | 27.98  | b3b5b8y9y12°y12                         | 2291.06 | 115.812 | 2363    | 3 | 764.36  | 6.07   |
| P12814 ACTN1_HUMAN Alpha-actinin-1 | 44 | Carbamidomethyl+C(1);<br>Phosphoryl STY() | CQLEINFNTLQTK                       | 331 | 13 | 3  | 28.11  | y4y5y8_HPO3 y8                          | 1688.78 | 32.161  | 7609    | 2 | 844.89  | 8.96   |
| P12814 ACTN1_HUMAN Alpha-actinin-1 | 45 | Phosphoryl STY(6)                         | RDQALTEEHAR                         | 613 | 11 | 3  | 27.3   | b5b6y4                                  | 1405.60 | 45.197  | 3923    | 2 | 703.31  | -5.38  |
| P12814 ACTN1_HUMAN Alpha-actinin-1 | 46 | Oxidation+M(7)                            | GISQEQMNEFR                         | 741 | 11 | 5  | 35.28  | b3°b3b6y4y9                             | 1354.61 | 40.293  | 14667   | 3 | 452.21  | 2.79   |
| P12814 ACTN1_HUMAN Alpha-actinin-1 | 47 | Oxidation+M()                             | AIMTYVSSFYHAFSGAQK                  | 236 | 18 | 4  | 24.8   | b3b12b17y12                             | 2023.94 | 53.418  | 6631    | 3 | 675.32  | -9.17  |
| P12814 ACTN1_HUMAN Alpha-actinin-1 | 48 | Oxidation+M(13)                           | LGVVTFQAFIDFMSRETADTDAD<br>QVMASFK  | 803 | 31 | 4  | 11.25  | b13y5y8*y8                              | 3457.68 | 126.687 | 4295    | 3 | 1153.23 | 13.91  |
| P12814 ACTN1_HUMAN Alpha-actinin-1 | 49 | Oxidation+M(1)                            | MAPYTGPDSPVPGALDYMSFSTAL<br>YGESDL  | 863 | 29 | 4  | 14.51  | b3b13y4y12                              | 3071.38 | 69.022  | 2971    | 3 | 1024.47 | 10.17  |
| P12814 ACTN1_HUMAN Alpha-actinin-1 | 50 | Oxidation+M(2)                            | IMSIVDPNR                           | 794 | 9  | 4  | 53.22  | b3b6b8y4                                | 1060.53 | 99.180  | 2303    | 1 | 1060.53 | -10.01 |
| P12814 ACTN1_HUMAN Alpha-actinin-1 | 51 |                                           | LPDADKER                            | 557 | 8  | 1  | 8.25   | b3                                      | 943.48  | 26.353  | 16629   | 2 | 472.24  | -3.49  |
| P12814 ACTN1_HUMAN Alpha-actinin-1 | 52 |                                           | PDADKER                             | 558 | 7  | 2  | 20.67  | b4b6                                    | 830.40  | 26.356  | 14690   | 2 | 415.70  | -5.00  |
| P12814 ACTN1_HUMAN Alpha-actinin-1 | 53 |                                           | TLPDADKER                           | 556 | 9  | 0  | 2.02   |                                         | 1044.53 | 26.357  | 8627    | 2 | 522.77  | -3.39  |

|                                         |    |                                                                    |                                       |     |    |    |        |                                                                                                                                          |         |         |        |   |         |        |
|-----------------------------------------|----|--------------------------------------------------------------------|---------------------------------------|-----|----|----|--------|------------------------------------------------------------------------------------------------------------------------------------------|---------|---------|--------|---|---------|--------|
| P12814 ACTN1_HUMAN Alpha-actinin-1      | 54 |                                                                    | IDQLEGDHQ                             | 684 | 9  | 0  | 6.07   |                                                                                                                                          | 1054.48 | 82.382  | 1572   | 1 | 1054.48 | 3.01   |
| P12814 ACTN1_HUMAN Alpha-actinin-1      | 55 | Carbamidomethyl+C(2)                                               | ICDQWDNLGALTQK                        | 478 | 14 | 0  | 3.64   |                                                                                                                                          | 1643.78 | 70.174  | 17436  | 3 | 548.60  | 1.93   |
| P02675 FIBB_HUMAN Fibrinogen beta chain | 1  |                                                                    | DNENVVNEYSSELEK                       | 163 | 15 | 8  | 37.07  | b5b13y2 <sup>2</sup> y2y7y10y11y15                                                                                                       | 1768.79 | 60.410  | 171742 | 2 | 884.90  | 2.00   |
| P02675 FIBB_HUMAN Fibrinogen beta chain | 2  | Carbamidomethyl+C(3); Carbamidomethyl+C(7)                         | TPCTVSCNIPVVSQK                       | 224 | 15 | 18 | 131.02 | b2 <sup>2</sup> b2b3b9b11 <sup>*</sup> b11b12b14 <sup>*</sup> b14y3y4y6y10y11y12y13 <sup>*</sup> y13y15                                  | 1618.80 | 51.705  | 143384 | 2 | 809.90  | 4.75   |
| P02675 FIBB_HUMAN Fibrinogen beta chain | 3  |                                                                    | IRPFPQQ                               | 483 | 8  | 7  | 67.28  | b2b4b6y3 <sup>*</sup> y3y4y6                                                                                                             | 1032.55 | 61.056  | 123029 | 2 | 516.78  | -9.46  |
| P02675 FIBB_HUMAN Fibrinogen beta chain | 4  | Carbamidomethyl+C(3)                                               | VYCDMNTENGGWTVIQNR                    | 267 | 18 | 21 | 114.63 | b1b2b3b14 <sup>*</sup> b14y2y3 <sup>*</sup> y3y4 <sup>*</sup> y4y5y6y9y10y12y13 <sup>*</sup> y13y14 <sup>*</sup> y14y18 <sup>*</sup> y18 | 2156.96 | 62.892  | 109142 | 2 | 1078.98 | 4.64   |
| P02675 FIBB_HUMAN Fibrinogen beta chain | 5  |                                                                    | HGTDDGVVWMNWK                         | 458 | 13 | 13 | 77.95  | b1b2b6b7 <sup>*</sup> b7b8 <sup>*</sup> b8y2y4y5y11y12y13                                                                                | 1544.71 | 71.275  | 63458  | 2 | 772.86  | 10.75  |
| P02675 FIBB_HUMAN Fibrinogen beta chain | 6  |                                                                    | TMTIHNGMFFSTYDRDNDGWLTS DPR           | 395 | 26 | 9  | 21.92  | b1b2b7 <sup>*</sup> b7b19y2y7y9y20                                                                                                       | 3077.33 | 77.324  | 50203  | 4 | 770.09  | -6.35  |
| P02675 FIBB_HUMAN Fibrinogen beta chain | 7  |                                                                    | REEAPSLRPAPPISGGGYR                   | 52  | 20 | 9  | 66.8   | b2b4b7b10y3y4y5y6y8                                                                                                                      | 2107.08 | 48.369  | 49029  | 4 | 527.52  | -13.44 |
| P02675 FIBB_HUMAN Fibrinogen beta chain | 8  |                                                                    | AHYGGFTVQNEANK                        | 353 | 14 | 8  | 48.41  | b2b8y5y6 <sup>*</sup> y6y11y12y14                                                                                                        | 1535.72 | 39.269  | 43516  | 3 | 512.58  | -5.56  |
| P02675 FIBB_HUMAN Fibrinogen beta chain | 9  |                                                                    | TMTIHNGMFFSTYDR                       | 395 | 15 | 7  | 29.42  | b6y1y4y9y12 <sup>*</sup> y12y15                                                                                                          | 1820.82 | 63.855  | 35617  | 2 | 910.91  | 6.97   |
| P02675 FIBB_HUMAN Fibrinogen beta chain | 10 |                                                                    | SILENLR                               | 199 | 7  | 5  | 40.45  | b2y3y4y5y7                                                                                                                               | 844.49  | 55.720  | 25386  | 1 | 844.49  | 3.40   |
| P02675 FIBB_HUMAN Fibrinogen beta chain | 11 | Carbamidomethyl+C(3); Carbamidomethyl+C(7); Carbamidomethyl+C(17)  | TPCTVSCNIPVVSQKECEEIIR                | 224 | 22 | 5  | 29.73  | y3y10y13y17y22                                                                                                                           | 2548.23 | 61.561  | 21460  | 3 | 850.08  | 3.54   |
| P02675 FIBB_HUMAN Fibrinogen beta chain | 12 |                                                                    | NSVDELNNNVEAVSQTSSSSFY MYLLK          | 124 | 28 | 13 | 59.36  | b2b3b4b9y2y3y4y6y10 <sup>*</sup> y10y11y15y28                                                                                            | 3167.50 | 89.525  | 15260  | 2 | 1584.25 | 4.32   |
| P02675 FIBB_HUMAN Fibrinogen beta chain | 13 |                                                                    | QGFGNVATNTDQK                         | 300 | 13 | 3  | 25.4   | b3y9y10                                                                                                                                  | 1308.61 | 30.438  | 3183   | 2 | 654.81  | -5.32  |
| P02675 FIBB_HUMAN Fibrinogen beta chain | 14 |                                                                    | HQLYIDETVNSNIPTNLR                    | 178 | 18 | 3  | 22.73  | y3y5y14                                                                                                                                  | 2127.07 | 63.314  | 82410  | 3 | 709.69  | -8.26  |
| P02675 FIBB_HUMAN Fibrinogen beta chain | 15 | Carbamidomethyl+C(12)                                              | LESDVSAQMEYCR                         | 211 | 13 | 4  | 34.05  | b4b8b10y3                                                                                                                                | 1587.71 | 77.226  | 63692  | 2 | 794.36  | 22.07  |
| P02675 FIBB_HUMAN Fibrinogen beta chain | 16 |                                                                    | EEAPSLRPAPPISGGGYR                    | 53  | 19 | 6  | 31.61  | b3b9 <sup>*</sup> b9y5y8y9                                                                                                               | 1951.02 | 52.039  | 23811  | 2 | 976.01  | 7.01   |
| P02675 FIBB_HUMAN Fibrinogen beta chain | 17 |                                                                    | YQISVNK                               | 367 | 7  | 5  | 40.45  | b4b6y4 <sup>*</sup> y4 <sup>*</sup> y4                                                                                                   | 851.45  | 42.173  | 22853  | 1 | 851.45  | -13.19 |
| P02675 FIBB_HUMAN Fibrinogen beta chain | 18 |                                                                    | GGETSEMYLIQPDSSVKPYR                  | 247 | 20 | 4  | 21.15  | b3 <sup>*</sup> b3b9b12                                                                                                                  | 2257.12 | 122.375 | 11519  | 3 | 753.05  | 19.25  |
| P02675 FIBB_HUMAN Fibrinogen beta chain | 19 |                                                                    | GTAGNALMDGASQLMGENR                   | 376 | 19 | 7  | 29.39  | b7 <sup>*</sup> b7b13y3 <sup>*</sup> y3y12y15                                                                                            | 1892.82 | 50.786  | 7401   | 2 | 946.91  | -21.35 |
| P02675 FIBB_HUMAN Fibrinogen beta chain | 20 | Carbamidomethyl+C(3)                                               | NYCGLPGEYWLGNK                        | 313 | 15 | 5  | 25.77  | b6b13y6y8 <sup>*</sup> y8                                                                                                                | 1785.78 | 60.244  | 4514   | 2 | 893.39  | -5.06  |
| P02675 FIBB_HUMAN Fibrinogen beta chain | 21 | Carbamidomethyl+C(8); Carbamidomethyl+C(19); Carbamidomethyl+C(23) | KAPDAGGCLHADPDLGVLCPGTC QLQEALLQERPIR | 87  | 37 | 23 | 168.81 | b4b10b12b14b15b16b17b18b19y3y4y10y12 <sup>*</sup> y12y14y18 <sup>*</sup> y18y19y20y22y23y25y35                                           | 4083.97 | 79.146  | 331662 | 5 | 817.60  | -10.46 |
| P02675 FIBB_HUMAN Fibrinogen beta chain | 22 |                                                                    | KGGETSEMYLIQPDSSVKPYR                 | 246 | 21 | 16 | 128.75 | b5b7b8 <sup>*</sup> b8b10 <sup>*</sup> b10b11b12y3y4y7y8y9y10 <sup>*</sup> y10y11                                                        | 2385.14 | 57.431  | 208001 | 4 | 597.04  | -13.20 |

|                                         |    |                                                                     |                                     |     |    |    |       |                                                 |         |         |        |   |         |        |
|-----------------------------------------|----|---------------------------------------------------------------------|-------------------------------------|-----|----|----|-------|-------------------------------------------------|---------|---------|--------|---|---------|--------|
| P02675 FIBB_HUMAN Fibrinogen beta chain | 23 |                                                                     | MGPTELLIEMEDWKGDK                   | 334 | 17 | 13 | 85.58 | b7b10y3°y3y4°y4y5°y5y6°y6y11y12y14              | 1991.93 | 90.608  | 152586 | 3 | 664.65  | -8.15  |
| P02675 FIBB_HUMAN Fibrinogen beta chain | 24 | Carbamidomethyl+C(16)                                               | QGFGNVATNTDGKNYCGLPGEY WLGNDK       | 300 | 28 | 7  | 20.5  | b9b14y4°y4y10y13°y13                            | 3075.39 | 74.412  | 29481  | 3 | 1025.80 | 1.43   |
| P02675 FIBB_HUMAN Fibrinogen beta chain | 25 |                                                                     | VKAHYGGFTVQNEANK                    | 351 | 16 | 4  | 28.32 | b7b8b13y11                                      | 1762.88 | 81.305  | 21221  | 3 | 588.30  | -1.80  |
| P02675 FIBB_HUMAN Fibrinogen beta chain | 26 |                                                                     | GTAGNALMDGASQLMGENRTMT IHNGMFFSTYDR | 376 | 34 | 5  | 15.31 | b5b10b19y15°y15                                 | 3694.66 | 82.048  | 3854   | 3 | 1232.22 | 1.65   |
| P02675 FIBB_HUMAN Fibrinogen beta chain | 27 | Carbamidomethyl+C(3); Carbamidomethyl+C(7); Carbamidomethyl+C(17)   | TPCTVSCNIPVVSQKECEEIIR              | 224 | 22 | 3  | 19.94 | b4b6b9                                          | 2548.20 | 92.636  | 3341   | 3 | 850.07  | -8.24  |
| P02675 FIBB_HUMAN Fibrinogen beta chain | 28 | Carbamidomethyl+C(12); Carbamidomethyl+C(16); Carbamidomethyl+C(20) | LES DVSAQMEYCRTPCTVSCNIPV VSGK      | 211 | 28 | 3  | 11.7  | b12y9y13                                        | 3187.44 | 104.941 | 2055   | 4 | 797.62  | -3.14  |
| P02675 FIBB_HUMAN Fibrinogen beta chain | 29 |                                                                     | REEAPSLRPAPPISGGGYR                 | 52  | 20 | 3  | 14.36 | b3y5y10                                         | 2107.10 | 115.168 | 1773   | 2 | 1054.05 | -1.62  |
| P02675 FIBB_HUMAN Fibrinogen beta chain | 30 | Phosphoryl STY(15)                                                  | REEAPSLRPAPPISGGGYR                 | 52  | 20 | 5  | 27.87 | b4°b4b6y4y5                                     | 2187.04 | 58.919  | 5708   | 3 | 729.69  | -7.70  |
| P02675 FIBB_HUMAN Fibrinogen beta chain | 31 | Phosphoryl STY(12)                                                  | GTAGNALMDGASQLMGENR                 | 376 | 19 | 4  | 14.93 | b11°b11y7y18                                    | 1972.84 | 46.222  | 5094   | 3 | 658.29  | 13.06  |
| P02675 FIBB_HUMAN Fibrinogen beta chain | 32 | Oxidation+M(24)                                                     | NSVDELNNNVEAVSQTSSSSFQY MYLLK       | 124 | 28 | 7  | 40.34 | b3b10°b10b11b13b14y15                           | 3183.49 | 81.433  | 16082  | 4 | 796.63  | 3.68   |
| P02675 FIBB_HUMAN Fibrinogen beta chain | 33 | Oxidation+M(15)                                                     | GTAGNALMDGASQLMGENR                 | 376 | 19 | 3  | 14.93 | b14y11y18                                       | 1908.87 | 82.085  | 6700   | 2 | 954.94  | 9.40   |
| P02675 FIBB_HUMAN Fibrinogen beta chain | 34 | Oxidation+M(24)                                                     | NSVDELNNNVEAVSQTSSSSFQY MYLLKDLWQK  | 124 | 33 | 3  | 22.85 | b10b11b15                                       | 3853.78 | 108.287 | 1719   | 4 | 964.20  | -11.91 |
| P02675 FIBB_HUMAN Fibrinogen beta chain | 35 | Carbamidomethyl+C(3)                                                | VSCNIPV VSGK                        | 228 | 11 | 2  | 7.26  | b10°b10                                         | 1159.61 | 51.716  | 3385   | 2 | 580.31  | -4.11  |
| P02675 FIBB_HUMAN Fibrinogen beta chain | 36 |                                                                     | TMTIHNGMFFSTY                       | 395 | 13 | 2  | 12.14 | y3y10                                           | 1549.67 | 77.285  | 1586   | 2 | 775.34  | -6.46  |
| P02675 FIBB_HUMAN Fibrinogen beta chain | 37 |                                                                     | AHYGGFTVQNEANK                      | 353 | 14 | 1  | 7.31  | b9                                              | 1518.72 | 39.289  | 4459   | 3 | 506.91  | 14.79  |
| Q9NY65 TBA8_HUMAN Tubulin alpha-8 chain | 1  |                                                                     | VGINYQPPTVVPGDLAK                   | 352 | 18 | 15 | 94.35 | b5°b5b6b7b8b10b11°b11y1y2y3y7y8y12y18           | 1824.99 | 65.865  | 221198 | 2 | 913.00  | 1.54   |
| Q9NY65 TBA8_HUMAN Tubulin alpha-8 chain | 2  |                                                                     | NLDIERPTYTNLNR                      | 215 | 14 | 18 | 81.07 | b2°b2b3b5°b5°b5b11*y2y3y4*y4y6y7y8*y8y12y14*y14 | 1718.86 | 52.848  | 136360 | 3 | 573.63  | -11.29 |
| Q9NY65 TBA8_HUMAN Tubulin alpha-8 chain | 3  |                                                                     | LISQIVSSITASLR                      | 229 | 14 | 9  | 86.51 | b4°b4b5y3y4y5y8y9y12                            | 1487.88 | 100.837 | 88935  | 2 | 744.44  | 2.05   |
| Q9NY65 TBA8_HUMAN Tubulin alpha-8 chain | 4  |                                                                     | FDGALNVDLTEFQTNLVPYPR               | 243 | 21 | 10 | 44.02 | b2b3b5b17y2y4y5y12y14y21                        | 2409.23 | 94.898  | 47635  | 2 | 1205.12 | 8.92   |
| Q9NY65 TBA8_HUMAN Tubulin alpha-8 chain | 5  |                                                                     | EDLAALEK                            | 422 | 8  | 8  | 33.07 | b3b4b8y2°y2y3°y3y8                              | 888.47  | 35.470  | 33015  | 2 | 444.74  | 4.95   |
| Q9NY65 TBA8_HUMAN Tubulin alpha-8 chain | 6  |                                                                     | ESIDLVLDR                           | 112 | 9  | 3  | 30.47 | b4b8y3                                          | 1059.56 | 63.668  | 9495   | 2 | 530.28  | -5.99  |
| Q9NY65 TBA8_HUMAN Tubulin alpha-8 chain | 7  | Carbamidomethyl+C(15); Carbamidomethyl+C(25)                        | AYHEQLSVAEITSSCFEPNSQMVK C DPR      | 280 | 28 | 9  | 29.61 | b7b9°b9y4y6y11y12°y12*y12                       | 3283.46 | 81.409  | 17286  | 4 | 821.62  | -6.02  |
| Q9NY65 TBA8_HUMAN Tubulin alpha-8 chain | 8  | Carbamidomethyl+C(15); Oxidation+M(22)                              | AYHEQLSVAEITSSCFEPNSQMVK            | 280 | 24 | 11 | 28.37 | b6b8°b8°b8b11°b11°b11b15°b15°b15y9              | 2771.28 | 89.800  | 11647  | 3 | 924.43  | 6.08   |

|                                             |    |                                                                                    |                                           |      |    |    |        |                                                                                         |         |         |        |   |         |        |
|---------------------------------------------|----|------------------------------------------------------------------------------------|-------------------------------------------|------|----|----|--------|-----------------------------------------------------------------------------------------|---------|---------|--------|---|---------|--------|
| Q9NY65 TBA8_HUMAN Tubulin alpha-8 chain     | 9  | Carbamidomethyl+C(4); Carbamidomethyl+C(20); Carbamidomethyl+C(25); Oxidation+M(1) | MRECISVHVQAGVQIGNACWELFCLEHGIQADGTFDAQASK | 0    | 42 | 11 | 36.18  | b8°b8b9°b9b12y4*y4y7y9y11y15                                                            | 4706.23 | 116.612 | 7045   | 5 | 942.05  | 13.38  |
| Q9NY65 TBA8_HUMAN Tubulin alpha-8 chain     | 10 | Carbamidomethyl+C(5); Oxidation+M(30)                                              | LTDACSLQGLFIFHSFGGGTSGSFTSLLMER           | 124  | 32 | 5  | 13.55  | b12b16°b16y6y16                                                                         | 3379.62 | 91.405  | 6153   | 3 | 1127.21 | 2.67   |
| Q9NY65 TBA8_HUMAN Tubulin alpha-8 chain     | 11 |                                                                                    | DIERPTYTNLNR                              | 217  | 12 | 4  | 27.05  | b3°b3b4b9                                                                               | 1491.75 | 52.823  | 10855  | 2 | 746.38  | -3.19  |
| Q9NY65 TBA8_HUMAN Tubulin alpha-8 chain     | 12 |                                                                                    | PGGDIAK                                   | 363  | 7  | 2  | 13.49  | b3b5                                                                                    | 657.35  | 65.879  | 2848   | 2 | 329.18  | -12.81 |
| Q13748 TBA3C_HUMAN Tubulin alpha-3C/D chain | 1  |                                                                                    | VGINYQPPTVVPGGDLAK                        | 352  | 18 | 15 | 94.35  | b5°b5b6b7b8b10b11°b11y1y2y3y7y8y12y18                                                   | 1824.99 | 65.865  | 221198 | 2 | 913.00  | 1.54   |
| Q13748 TBA3C_HUMAN Tubulin alpha-3C/D chain | 2  |                                                                                    | NLDIERPTYTNLNR                            | 215  | 14 | 18 | 81.07  | b2°b2b3b5°b5°b5b11°y2y3y4*y4y6y7y8*y8y12y14*y14                                         | 1718.86 | 52.848  | 136360 | 3 | 573.63  | -11.29 |
| Q13748 TBA3C_HUMAN Tubulin alpha-3C/D chain | 3  | Carbamidomethyl+C(15)                                                              | AYHEQLSVAEITNACFEPANQMVK                  | 280  | 24 | 7  | 39.61  | b3b7b9b10y7y9y11                                                                        | 2750.30 | 73.543  | 69795  | 3 | 917.44  | 4.70   |
| Q13748 TBA3C_HUMAN Tubulin alpha-3C/D chain | 4  |                                                                                    | FDGALNVDLTFEQTNLVPYPR                     | 243  | 21 | 10 | 44.02  | b2b3b5b17y2y4y5y12y14y21                                                                | 2409.23 | 94.898  | 47635  | 2 | 1205.12 | 8.92   |
| Q13748 TBA3C_HUMAN Tubulin alpha-3C/D chain | 5  |                                                                                    | EDLAALEK                                  | 422  | 8  | 8  | 33.07  | b3b4b8y2°y2y3°y3y8                                                                      | 888.47  | 35.470  | 33015  | 2 | 444.74  | 4.95   |
| Q13748 TBA3C_HUMAN Tubulin alpha-3C/D chain | 6  |                                                                                    | LSVDYGKK                                  | 156  | 8  | 8  | 67.28  | b2y3y4y5y6°y6y7y8                                                                       | 909.50  | 29.926  | 30988  | 2 | 455.25  | -5.50  |
| Q13748 TBA3C_HUMAN Tubulin alpha-3C/D chain | 7  | Carbamidomethyl+C(5)                                                               | LADLCTGLQGLFIFHSFGGGTSGS FASLLMER         | 124  | 32 | 6  | 13.55  | b7b12y13°y13y15°y15                                                                     | 3359.64 | 120.648 | 52224  | 4 | 840.66  | -5.96  |
| P35749 MYH11_HUMAN Myosin-11                | 1  |                                                                                    | QLLQANPILEAFGNAK                          | 216  | 16 | 32 | 198.08 | b2°b2b3°b3b4°b4b5°b5b6°b6b12b15b16y1y2y4*y4y5y6y7°y7*y7y8y10*y10y11y12y13*y13y14*y14y16 | 1726.95 | 91.473  | 248530 | 2 | 863.98  | -1.63  |
| P35749 MYH11_HUMAN Myosin-11                | 2  |                                                                                    | TQLEELEDELQATEDAK                         | 1545 | 17 | 24 | 172.26 | b2°b2b5b6b9b10b11°b11b12°b12°b12b13°b13b14y2y4y5y6y9y13*y13y14y15y17                    | 1961.93 | 79.205  | 128856 | 2 | 981.47  | 5.60   |
| P35749 MYH11_HUMAN Myosin-11                | 3  |                                                                                    | KEEELQAALAR                               | 1087 | 11 | 19 | 129.79 | b2°b2b3°b3b4b6°b6b8y1y4y5y7y8y9°y9y10°y10y11*y11                                        | 1257.67 | 43.025  | 73666  | 2 | 629.34  | -4.66  |
| P35749 MYH11_HUMAN Myosin-11                | 4  |                                                                                    | DLGEELEALK                                | 1142 | 10 | 5  | 47.89  | b3b7°b7b9y3                                                                             | 1116.58 | 72.867  | 63039  | 2 | 558.79  | -0.77  |
| P35749 MYH11_HUMAN Myosin-11                | 5  |                                                                                    | NTDQASMPDNAAQK                            | 365  | 15 | 9  | 55.34  | b2b15y3y8*y8y9y10y11y15                                                                 | 1591.70 | 27.066  | 51228  | 2 | 796.35  | 0.08   |
| P35749 MYH11_HUMAN Myosin-11                | 6  | Carbamidomethyl+C(1)                                                               | CNGVLEGR                                  | 700  | 9  | 7  | 54.47  | b2°b2y3y4y5y7y9                                                                         | 1017.51 | 49.140  | 45436  | 2 | 509.26  | -2.88  |
| P35749 MYH11_HUMAN Myosin-11                | 7  |                                                                                    | EEELQAALAR                                | 1088 | 10 | 6  | 40.11  | b6y3y5y6y10*y10                                                                         | 1129.58 | 49.841  | 39172  | 2 | 565.30  | -0.32  |
| P35749 MYH11_HUMAN Myosin-11                | 8  |                                                                                    | DEIFATAKENEK                              | 1668 | 12 | 8  | 36.14  | b2b7°b7b9y6*y6y7°y7                                                                     | 1394.70 | 69.612  | 11651  | 2 | 697.85  | 11.47  |
| P35749 MYH11_HUMAN Myosin-11                | 9  |                                                                                    | LQAQMKDFQRELEDAR                          | 1649 | 16 | 5  | 17.15  | b5b8°b8y12y16                                                                           | 1978.00 | 58.183  | 8602   | 2 | 989.51  | 11.97  |
| P35749 MYH11_HUMAN Myosin-11                | 10 | Carbamidomethyl+C(12)                                                              | ITDVIMAFQAMCR                             | 785  | 13 | 4  | 20.63  | b5°b5y5y10                                                                              | 1555.74 | 77.821  | 5807   | 2 | 778.37  | -1.10  |
| P35749 MYH11_HUMAN Myosin-11                | 11 |                                                                                    | EILLQVEDER                                | 1852 | 10 | 4  | 26.89  | b3b9°b9y7                                                                               | 1243.64 | 88.611  | 5277   | 2 | 622.33  | -7.85  |

|                              |    |                      |                         |      |    |   |       |                      |         |         |        |   |         |        |
|------------------------------|----|----------------------|-------------------------|------|----|---|-------|----------------------|---------|---------|--------|---|---------|--------|
| P35749 MYH11_HUMAN Myosin-11 | 12 |                      | SLEADLMQLQEDLAAER       | 1683 | 18 | 3 | 15.57 | b6b14y9              | 2002.98 | 87.820  | 4673   | 2 | 1001.99 | 2.74   |
| P35749 MYH11_HUMAN Myosin-11 | 13 |                      | NLLQEQLQAETELYAEAEEMR   | 889  | 21 | 7 | 24.69 | b1b2b14*b14y11y12y15 | 2508.18 | 99.953  | 3391   | 4 | 627.80  | -4.77  |
| P35749 MYH11_HUMAN Myosin-11 | 14 |                      | LQRELDATESNEAMGREVNALK  | 1902 | 23 | 5 | 19.45 | y5y13°y13y15°y15     | 2603.27 | 79.085  | 2097   | 4 | 651.57  | 0.38   |
| P35749 MYH11_HUMAN Myosin-11 | 15 |                      | LEVNMQALK               | 1564 | 9  | 4 | 44.93 | b6b8y5y8             | 1045.56 | 36.158  | 116786 | 2 | 523.28  | -10.04 |
| P35749 MYH11_HUMAN Myosin-11 | 16 |                      | LEGDASDFHEQIADLQAQIAELK | 1059 | 23 | 4 | 23.13 | b3b12*b12b13         | 2541.30 | 118.545 | 65163  | 3 | 847.77  | 21.62  |
| P35749 MYH11_HUMAN Myosin-11 | 17 |                      | QLHEYETELEDER           | 1596 | 13 | 3 | 20.63 | b4b7y4               | 1690.79 | 42.929  | 34925  | 3 | 564.27  | 19.42  |
| P35749 MYH11_HUMAN Myosin-11 | 18 |                      | TFHIFYMIAGAK            | 279  | 13 | 4 | 20.63 | b6°b6y3y9            | 1561.80 | 43.972  | 17516  | 3 | 521.27  | 8.60   |
| P35749 MYH11_HUMAN Myosin-11 | 19 |                      | LEAQVQELQSK             | 1256 | 11 | 3 | 36.05 | y3y6y9               | 1272.66 | 75.397  | 15654  | 2 | 636.83  | -14.68 |
| P35749 MYH11_HUMAN Myosin-11 | 20 | Carbamidomethyl-C(2) | LCTEQGSHPK              | 552  | 10 | 6 | 43.12 | b7y4°y4y5y6°y6       | 1156.53 | 37.928  | 11506  | 3 | 386.18  | -12.45 |
| P35749 MYH11_HUMAN Myosin-11 | 21 |                      | ALETQMEEMK              | 1535 | 10 | 3 | 26.89 | b3b8y8               | 1209.55 | 30.349  | 9931   | 3 | 403.85  | -1.51  |
| P35749 MYH11_HUMAN Myosin-11 | 22 |                      | LEDEILVMDDQNNK          | 982  | 14 | 4 | 30.72 | b5b6b13y8            | 1675.77 | 82.009  | 8600   | 2 | 838.39  | -9.11  |
| P35749 MYH11_HUMAN Myosin-11 | 23 |                      | EIENLTQQYEEK            | 1399 | 12 | 4 | 22.26 | b6y8*y8y10           | 1523.70 | 33.552  | 7267   | 2 | 762.35  | -13.70 |
| P35749 MYH11_HUMAN Myosin-11 | 24 |                      | MAQQMLDLEEQLEEEAAR      | 947  | 19 | 5 | 24.1  | y11*y11y13y14*y14    | 2263.06 | 77.384  | 7136   | 3 | 755.02  | 16.29  |
| P35749 MYH11_HUMAN Myosin-11 | 25 |                      | ISDLTTNLAEEEEK          | 1007 | 14 | 6 | 39    | b5b12b13y11y13°y13   | 1591.76 | 136.643 | 4061   | 1 | 1591.76 | -3.53  |
| P35749 MYH11_HUMAN Myosin-11 | 26 |                      | ATQQAELQSNELATER        | 1761 | 16 | 6 | 59.26 | b4b5b7b8y8y9         | 1788.84 | 98.412  | 3315   | 2 | 894.92  | -19.99 |
| P35749 MYH11_HUMAN Myosin-11 | 27 |                      | SHEAQVQEMR              | 1188 | 10 | 4 | 40.11 | b9y3y8y9             | 1214.54 | 32.024  | 2678   | 3 | 405.52  | -16.99 |
| P35749 MYH11_HUMAN Myosin-11 | 28 |                      | LQNEVESVTGMLNEAEGK      | 1284 | 18 | 5 | 15.57 | b4°b4b6y11°y11       | 1947.93 | 102.263 | 2328   | 3 | 649.98  | -0.31  |
| P35749 MYH11_HUMAN Myosin-11 | 29 |                      | MTESSLPSASK             | 633  | 11 | 3 | 24.29 | b8b10y9              | 1137.52 | 33.654  | 2199   | 1 | 1137.52 | -20.28 |
| P35749 MYH11_HUMAN Myosin-11 | 30 |                      | LHEMEGAVK               | 1800 | 9  | 3 | 30.47 | b6y7y8               | 1013.50 | 109.920 | 2006   | 1 | 1013.50 | -5.06  |
| P35749 MYH11_HUMAN Myosin-11 | 31 |                      | HAQAVEELTEQLEQFK        | 1200 | 16 | 6 | 41.28 | b12*b12b13y4y7y9     | 1899.98 | 102.726 | 1941   | 3 | 634.00  | 16.00  |
| P35749 MYH11_HUMAN Myosin-11 | 32 |                      | NFINSVAQADWAAK          | 18   | 15 | 6 | 29.42 | b4*b4y5y7y11*y11     | 1631.83 | 37.112  | 1779   | 3 | 544.61  | 6.66   |
| P35749 MYH11_HUMAN Myosin-11 | 33 |                      | ALDEETR                 | 1181 | 7  | 5 | 37.44 | b3y3°y3y4°y4         | 833.41  | 84.483  | 1723   | 1 | 833.41  | 16.99  |
| P35749 MYH11_HUMAN Myosin-11 | 34 |                      | DVASLSSQLQDTQELLEQETR   | 1308 | 21 | 3 | 22.32 | b11b12y9             | 2390.16 | 136.793 | 1604   | 2 | 1195.58 | -3.27  |
| P35749 MYH11_HUMAN Myosin-11 | 35 |                      | HEMPPHIYAIADTAYR        | 147  | 16 | 3 | 17.15 | b3b9y7               | 1884.87 | 48.940  | 1566   | 2 | 942.94  | -18.33 |
| P35749 MYH11_HUMAN Myosin-11 | 36 |                      | TEFSIIHYAGKVDYNASAWLTK  | 572  | 22 | 7 | 44.52 | b8b9b10b16b19y13*y13 | 2514.24 | 100.050 | 535758 | 3 | 838.75  | -10.88 |
| P35749 MYH11_HUMAN Myosin-11 | 37 |                      | SKLHEMEGAVK             | 1798 | 11 | 4 | 47.5  | b5b6b7b10            | 1228.62 | 99.217  | 167261 | 2 | 614.81  | -14.80 |
| P35749 MYH11_HUMAN Myosin-11 | 38 |                      | DLELQADSAIKGR           | 1627 | 13 | 6 | 28.11 | b4b5°b5b9°b9*b9      | 1415.75 | 64.917  | 137396 | 2 | 708.38  | 0.17   |
| P35749 MYH11_HUMAN Myosin-11 | 39 |                      | ALDEETRSHEAQVQEMR       | 1181 | 17 | 3 | 16.3  | b4b12y13             | 2028.96 | 83.406  | 122422 | 3 | 676.99  | 9.51   |
| P35749 MYH11_HUMAN Myosin-11 | 40 |                      | NISSKYADER              | 1461 | 10 | 4 | 26.89 | b8*b8y3y7            | 1182.59 | 71.980  | 24393  | 2 | 591.80  | 11.66  |



|                                        |    |                       |                             |      |    |    |       |                                    |         |         |        |   |         |        |
|----------------------------------------|----|-----------------------|-----------------------------|------|----|----|-------|------------------------------------|---------|---------|--------|---|---------|--------|
| P35749 MYH11_HUMAN Myosin-11           | 41 |                       | LEEEEDRGQQLQAER             | 930  | 15 | 4  | 26.21 | b3°b3b7b8                          | 1829.87 | 82.053  | 22800  | 2 | 915.44  | 5.34   |
| P35749 MYH11_HUMAN Myosin-11           | 42 |                       | ISDLTTNLAEEEEKAK            | 1007 | 16 | 3  | 24.85 | b7b9b11                            | 1790.90 | 83.604  | 18816  | 3 | 597.64  | -2.79  |
| P35749 MYH11_HUMAN Myosin-11           | 43 |                       | SHEAQVQEMRQK                | 1188 | 12 | 4  | 22.26 | b5°b5b11y3                         | 1470.71 | 43.126  | 17078  | 3 | 490.91  | -4.23  |
| P35749 MYH11_HUMAN Myosin-11           | 44 |                       | MLKAEMEDLVSSK               | 1507 | 13 | 4  | 20.63 | b8y8°y8y12                         | 1480.75 | 88.711  | 15193  | 2 | 740.88  | 4.70   |
| P35749 MYH11_HUMAN Myosin-11           | 45 |                       | IAQLEEELEEEQGNMEAMSDRVR     | 1737 | 23 | 5  | 28.79 | b7°b7b9b10b14                      | 2706.20 | 65.074  | 14468  | 2 | 1353.60 | -14.61 |
| P35749 MYH11_HUMAN Myosin-11           | 46 |                       | DEIFATAKENEK                | 1668 | 12 | 4  | 26.24 | b9y3°y3y4                          | 1394.70 | 50.756  | 9150   | 2 | 697.85  | 13.22  |
| P35749 MYH11_HUMAN Myosin-11           | 47 |                       | SLEADLMQLQEDLAAAERAR        | 1683 | 20 | 3  | 14.36 | b6b16y13                           | 2230.11 | 86.042  | 9031   | 3 | 744.04  | -1.75  |
| P35749 MYH11_HUMAN Myosin-11           | 48 |                       | LEVNMQALKQGFER              | 1564 | 14 | 3  | 19.27 | b3b13y6                            | 1662.85 | 48.316  | 7984   | 3 | 554.95  | -9.54  |
| P35749 MYH11_HUMAN Myosin-11           | 49 |                       | MAQKGQLSDDEK                | 0    | 12 | 4  | 36.14 | b4b6y5y6                           | 1349.63 | 48.960  | 4582   | 3 | 450.55  | -2.26  |
| P35749 MYH11_HUMAN Myosin-11           | 50 |                       | EEKGDEVVVELVENGK            | 51   | 16 | 3  | 23.68 | b11y4y5                            | 1772.88 | 63.712  | 3650   | 2 | 886.94  | -8.26  |
| P35749 MYH11_HUMAN Myosin-11           | 51 | Carbamidomethyl+C(16) | ERYFSGLIYTYGLFCVVVNPYK      | 106  | 23 | 6  | 33.88 | b5b7b8b12y3y13                     | 2775.35 | 109.985 | 3630   | 3 | 925.79  | -12.05 |
| P35749 MYH11_HUMAN Myosin-11           | 52 |                       | NKHESMISELEVR               | 1029 | 13 | 3  | 29.87 | b4b8b11                            | 1571.81 | 59.764  | 3480   | 2 | 786.41  | 13.13  |
| P35749 MYH11_HUMAN Myosin-11           | 53 |                       | VIENADGSEETDTRDADFNGTK      | 1946 | 23 | 4  | 17.47 | b4b6y6y11                          | 2513.12 | 31.033  | 2745   | 6 | 419.69  | 11.85  |
| P35749 MYH11_HUMAN Myosin-11           | 54 |                       | YEILAANAIPKGFMDGK           | 727  | 17 | 12 | 59.23 | b6°b6b7°b7b8°b8b10°b10y4y7y8°y8    | 1837.93 | 116.563 | 2744   | 3 | 613.31  | -12.75 |
| P35749 MYH11_HUMAN Myosin-11           | 55 |                       | EELAEELASSLSGRNALQDEK       | 1710 | 21 | 4  | 18.91 | b4b7y7y20                          | 2289.09 | 47.206  | 1821   | 3 | 763.70  | -12.59 |
| P35749 MYH11_HUMAN Myosin-11           | 56 | Phosphoryl STY(6)     | LQDFASTVEALEEGK             | 1379 | 15 | 4  | 29.42 | b4b5b11y12                         | 1716.79 | 97.476  | 97378  | 3 | 572.93  | 13.65  |
| P35749 MYH11_HUMAN Myosin-11           | 57 | Phosphoryl STY(14)    | NLLQEQLQAETELYAEAEEMR       | 889  | 21 | 4  | 34.66 | y5y6y7°y7                          | 2588.16 | 92.599  | 16773  | 2 | 1294.58 | 4.24   |
| P35749 MYH11_HUMAN Myosin-11           | 58 | Oxidation+M(5)        | LQAQMKDFQRELEDAR            | 1649 | 16 | 5  | 27.65 | b11y3y8y14*y14                     | 1993.96 | 82.035  | 5412   | 2 | 997.49  | -6.67  |
| P35749 MYH11_HUMAN Myosin-11           | 59 |                       | QMKDFQRELEDAR               | 1652 | 13 | 1  | 7.25  | b4                                 | 1665.80 | 58.187  | 1892   | 2 | 833.40  | 0.07   |
| P35749 MYH11_HUMAN Myosin-11           | 60 |                       | EILLQVEDER                  | 1852 | 10 | 1  | 8.25  | y3                                 | 1226.63 | 88.676  | 4895   | 2 | 613.82  | 9.75   |
| P04350 TBB4_HUMAN Tubulin beta-4 chain | 1  |                       | LAVNMVPPFR                  | 252  | 10 | 12 | 99.95 | b2b3b5y1y4y5y6y7*y7y8y9y10         | 1143.63 | 72.920  | 246238 | 2 | 572.32  | -1.81  |
| P04350 TBB4_HUMAN Tubulin beta-4 chain | 2  |                       | SGPFGQIFRPDNFVFGQSGAGNN WAK | 77   | 26 | 14 | 52.78 | b2b5b7°b7°b7b13b15y1y3y6y8y9y12y26 | 2798.35 | 89.960  | 186213 | 3 | 933.45  | 1.40   |
| P04350 TBB4_HUMAN Tubulin beta-4 chain | 3  |                       | IMNTFSVVPSPK                | 162  | 12 | 8  | 68.89 | b10y4°y4y7y8y9y11y12               | 1319.70 | 63.948  | 105530 | 2 | 660.36  | 1.57   |
| P04350 TBB4_HUMAN Tubulin beta-4 chain | 4  | Carbamidomethyl+C(23) | LTTPTYGDLNHLVSATMSGVTTC LR  | 216  | 25 | 9  | 74.47 | y3y5y6y7y8y12y13y22y25             | 2708.34 | 95.649  | 85886  | 3 | 903.45  | 0.18   |
| P04350 TBB4_HUMAN Tubulin beta-4 chain | 5  |                       | AVLVDLEPGTMDSVR             | 62   | 15 | 8  | 29.42 | b1b2b3y2y8y9y11y15                 | 1601.82 | 71.150  | 50258  | 2 | 801.41  | -2.97  |
| P04350 TBB4_HUMAN Tubulin beta-4 chain | 6  |                       | LHFFMPGFAPLTSR              | 262  | 14 | 9  | 79.14 | b2b3b4b8b9b13y3y5y12               | 1620.81 | 89.791  | 44064  | 3 | 540.94  | -14.46 |
| P04350 TBB4_HUMAN Tubulin beta-4 chain | 7  |                       | ALTVPELTQQMFDK              | 282  | 15 | 8  | 62.33 | y1y3y5°y5y7y9y11y15                | 1691.87 | 86.070  | 31987  | 2 | 846.44  | 3.25   |
| P04350 TBB4_HUMAN Tubulin beta-4 chain | 8  |                       | MAATFIGNSTAIQELFK           | 362  | 17 | 11 | 76.93 | b3b4b5°b5b6b9°b9b10y3y12°y12       | 1841.97 | 116.608 | 41874  | 3 | 614.66  | 12.46  |
| P04350 TBB4_HUMAN Tubulin beta-4 chain | 9  |                       | INVYYNEATGGNYVPR            | 46   | 16 | 5  | 24.24 | b7b12°b12y12y14                    | 1829.87 | 76.466  | 4469   | 2 | 915.44  | -5.07  |

|                                             |    |                                             |                                    |     |    |    |        |                                               |         |         |        |   |         |        |
|---------------------------------------------|----|---------------------------------------------|------------------------------------|-----|----|----|--------|-----------------------------------------------|---------|---------|--------|---|---------|--------|
| P04350 TBB4_HUMAN Tubulin beta-4 chain      | 10 |                                             | EEFPDRIMNTFSVVPSPK                 | 156 | 18 | 6  | 34.63  | b4b7b8°b8b13y16                               | 2093.01 | 108.409 | 49857  | 3 | 698.34  | -13.41 |
| P04350 TBB4_HUMAN Tubulin beta-4 chain      | 11 | Phosphoryl STY()                            | IMNTFSVVPSPK                       | 162 | 12 | 4  | 37.24  | b3b8b10y11                                    | 1399.68 | 58.951  | 18124  | 2 | 700.34  | 11.16  |
| P04350 TBB4_HUMAN Tubulin beta-4 chain      | 12 | Phosphoryl STY(10)                          | MAATFIGNSTAIQELFK                  | 362 | 17 | 7  | 43.8   | b4b7b9y9y10y12*y12                            | 1921.93 | 102.621 | 1741   | 3 | 641.32  | 14.55  |
| P04350 TBB4_HUMAN Tubulin beta-4 chain      | 13 |                                             | LTQQMFDAK                          | 288 | 9  | 0  | 4.05   |                                               | 1081.54 | 86.109  | 2469   | 1 | 1081.54 | 5.64   |
| Q86UX7 URP2_HUMAN Fermitin family homolog 3 | 1  |                                             | VVLGGVAPALFR                       | 166 | 13 | 14 | 117.59 | b1b2b3b4b6y2y5y6y7y8y9y10y11y13               | 1269.76 | 77.787  | 217248 | 2 | 635.38  | -4.23  |
| Q86UX7 URP2_HUMAN Fermitin family homolog 3 | 2  |                                             | LLVPSPEGMSEIYLR                    | 423 | 15 | 12 | 68.76  | b2b3y1y2y3y6y7y10y11y12°y12y15                | 1703.91 | 85.860  | 200721 | 2 | 852.46  | 6.59   |
| Q86UX7 URP2_HUMAN Fermitin family homolog 3 | 3  | Carbamidomethyl+C(15)                       | GMPAHFSDSAQTEACYHMLSRPQ PPPDPLLLQR | 179 | 33 | 8  | 53.36  | b2y3y4y5y6y19y22y33                           | 3747.75 | 70.079  | 154591 | 5 | 750.36  | -7.82  |
| Q86UX7 URP2_HUMAN Fermitin family homolog 3 | 4  |                                             | ILEAHQNV AQLSLAE AQLR              | 523 | 19 | 14 | 90.58  | b1b7b8°b8b9y1y4y5°y5y6*y6y7y8y19              | 2104.13 | 66.117  | 106257 | 3 | 702.05  | -10.33 |
| Q86UX7 URP2_HUMAN Fermitin family homolog 3 | 5  | Carbamidomethyl+C(15)                       | ASFSQPLFQAVAAICR                   | 113 | 16 | 13 | 115.79 | b4°b4b5y2y3y4y5y6y7y8y9y11y16                 | 1765.91 | 91.855  | 103475 | 2 | 883.46  | 2.35   |
| Q86UX7 URP2_HUMAN Fermitin family homolog 3 | 6  |                                             | TGSGGPGNHPHPDASAEGLNPY GLVAPR      | 481 | 29 | 18 | 136.47 | b5b9b11°b11b12b14b21y2y3y4y5y6y7y8y9y11y12y29 | 2782.31 | 59.685  | 86143  | 4 | 696.33  | -8.51  |
| Q86UX7 URP2_HUMAN Fermitin family homolog 3 | 7  |                                             | AGDALWLR                           | 242 | 8  | 6  | 49.3   | b7y2y3y4y6y8                                  | 901.48  | 61.946  | 39984  | 2 | 451.24  | -9.34  |
| Q86UX7 URP2_HUMAN Fermitin family homolog 3 | 8  | Carbamidomethyl+C(2)                        | GCEVVPD VNVSGQK                    | 405 | 14 | 14 | 86.51  | b2b3b4y3*y3y4*y4y8y9°y9y10*y10y12y14          | 1487.72 | 48.265  | 37809  | 2 | 744.37  | 5.01   |
| Q86UX7 URP2_HUMAN Fermitin family homolog 3 | 9  |                                             | TMADSSYTSEVQAILAFSLQR              | 459 | 22 | 12 | 78.23  | b2b3b13b14y1y2y4y5y6y7y8y22                   | 2431.23 | 120.327 | 31832  | 2 | 1216.12 | 3.82   |
| Q86UX7 URP2_HUMAN Fermitin family homolog 3 | 10 |                                             | LSQSGEVGEPAGTDPLDLDVA LSNLEVK      | 303 | 30 | 3  | 17.28  | y3y6y14                                       | 3025.53 | 95.663  | 27353  | 3 | 1009.18 | 14.93  |
| Q86UX7 URP2_HUMAN Fermitin family homolog 3 | 11 |                                             | FIQAWQSLPDFGISYVMVR                | 542 | 19 | 6  | 33.33  | b6y1y5y6y8y11                                 | 2257.13 | 105.005 | 10436  | 3 | 753.05  | -7.57  |
| Q86UX7 URP2_HUMAN Fermitin family homolog 3 | 12 |                                             | VFVGEEDEPEAESVTLR                  | 19  | 16 | 3  | 17.15  | b7y7y11                                       | 1776.87 | 60.393  | 34674  | 2 | 888.94  | 3.30   |
| Q86UX7 URP2_HUMAN Fermitin family homolog 3 | 13 | Carbamidomethyl+C(16);Carbamidomethyl+C(21) | QVAIEFDEHINVAFSCVSASCR             | 607 | 22 | 4  | 24.21  | b13y4y9y10                                    | 2539.15 | 81.585  | 26326  | 3 | 847.06  | -7.40  |
| Q86UX7 URP2_HUMAN Fermitin family homolog 3 | 14 |                                             | TASGDYIDSSWELR                     | 5   | 14 | 6  | 50.67  | b7b11y3y5y10y11                               | 1599.74 | 68.164  | 22382  | 2 | 800.37  | 8.78   |
| Q86UX7 URP2_HUMAN Fermitin family homolog 3 | 15 |                                             | FSNMR                              | 593 | 5  | 1  | 13.21  | b4                                            | 654.30  | 31.950  | 11034  | 1 | 654.30  | -11.29 |
| Q86UX7 URP2_HUMAN Fermitin family homolog 3 | 16 | Carbamidomethyl+C(5)                        | WMAGCR                             | 447 | 6  | 2  | 26.83  | y4y5                                          | 780.33  | 31.219  | 9810   | 2 | 390.67  | 1.02   |
| Q86UX7 URP2_HUMAN Fermitin family homolog 3 | 17 |                                             | TQLHSR                             | 222 | 6  | 1  | 13.62  | y5                                            | 741.41  | 97.777  | 7267   | 1 | 741.41  | 10.37  |
| Q86UX7 URP2_HUMAN Fermitin family homolog 3 | 18 |                                             | WLDSSR                             | 228 | 6  | 1  | 13.62  | y3                                            | 763.37  | 35.679  | 4902   | 2 | 382.19  | -5.60  |
| Q86UX7 URP2_HUMAN Fermitin family homolog 3 | 19 |                                             | DEILGIANNR                         | 567 | 10 | 5  | 28.65  | b4°b4b5y4*y4                                  | 1114.58 | 100.020 | 4454   | 1 | 1114.58 | -3.61  |
| Q86UX7 URP2_HUMAN Fermitin family homolog 3 | 20 |                                             | EPEEELYDSLK                        | 155 | 11 | 3  | 27.3   | b8b9y7                                        | 1351.64 | 54.317  | 3503   | 2 | 676.32  | 9.57   |
| Q86UX7 URP2_HUMAN Fermitin family homolog 3 | 21 |                                             | ARGEELDEDLFLQLTGGHEAF              | 646 | 21 | 4  | 24.69  | b7b9b10y18                                    | 2347.12 | 95.049  | 39539  | 3 | 783.04  | -0.73  |
| Q86UX7 URP2_HUMAN Fermitin family homolog 3 | 22 | Carbamidomethyl+C(1)                        | CLMQQGKAGDALWLR                    | 234 | 16 | 6  | 35.05  | b10b12*b12b13*b13b15                          | 1859.96 | 80.280  | 20435  | 2 | 930.49  | 0.53   |
| Q86UX7 URP2_HUMAN Fermitin family homolog 3 | 23 |                                             | AGMKTASGDYIDSSWELR                 | 1   | 18 | 5  | 21.72  | b7b11y8°y8y10                                 | 1986.92 | 114.539 | 10969  | 3 | 662.98  | -0.61  |
| Q86UX7 URP2_HUMAN Fermitin family homolog 3 | 24 |                                             | EKEPEEELYDSLK                      | 153 | 13 | 4  | 28.11  | b4b10b11°b11                                  | 1608.77 | 64.987  | 3675   | 2 | 804.89  | 5.54   |

|                                             |    |                                                                                                               |                                               |     |    |    |       |                                                      |         |         |        |   |         |        |
|---------------------------------------------|----|---------------------------------------------------------------------------------------------------------------|-----------------------------------------------|-----|----|----|-------|------------------------------------------------------|---------|---------|--------|---|---------|--------|
| Q86UX7 URP2_HUMAN Fermitin family homolog 3 | 25 |                                                                                                               | YYFFDLDPKTPVR                                 | 252 | 15 | 4  | 37.87 | b11b12b13y14                                         | 1862.92 | 86.742  | 2863   | 3 | 621.65  | 13.17  |
| Q86UX7 URP2_HUMAN Fermitin family homolog 3 | 26 |                                                                                                               | FKYYFFDLDPK                                   | 250 | 12 | 7  | 32.16 | b5*b5b11y7*y7y10*y10                                 | 1569.75 | 102.715 | 1554   | 2 | 785.38  | -7.78  |
| Q86UX7 URP2_HUMAN Fermitin family homolog 3 | 27 | Phosphoryl STY(25)                                                                                            | LSQSGEVGEPAGTDPGLDLDVA<br>LSNLEVK             | 303 | 30 | 10 | 33.48 | b5*b5b7b14_H3PO4<br>b14_HPO3<br>b14*b14b15y5y7*y7y29 | 3105.40 | 122.404 | 7191   | 4 | 777.10  | -14.07 |
| Q13885 TBB2A_HUMAN Tubulin beta-2A chain    | 1  |                                                                                                               | LAVNMVPPFR                                    | 252 | 10 | 12 | 99.95 | b2b3b5y1y4y5y6y7*y7y8y9y10                           | 1143.63 | 72.920  | 246238 | 2 | 572.32  | -1.81  |
| Q13885 TBB2A_HUMAN Tubulin beta-2A chain    | 2  |                                                                                                               | SGPFGQIFRPDNFVFGQSGAGNN<br>WAK                | 77  | 26 | 14 | 52.78 | b2b5b7*b7*b7b13b15y1y3y6y8y9y12y26                   | 2798.35 | 89.960  | 186213 | 3 | 933.45  | 1.40   |
| Q13885 TBB2A_HUMAN Tubulin beta-2A chain    | 3  | Carbamidomethyl+C(23)                                                                                         | LTTPTYGDLNHLVSATMSGVTTC<br>LR                 | 216 | 25 | 9  | 74.47 | y3y5y6y7y8y12y13y22y25                               | 2708.34 | 95.649  | 85886  | 3 | 903.45  | 0.18   |
| Q13885 TBB2A_HUMAN Tubulin beta-2A chain    | 4  |                                                                                                               | LHFFMPGFAPLTSR                                | 262 | 14 | 9  | 79.14 | b2b3b4b8b9b13y3y5y12                                 | 1620.81 | 89.791  | 44064  | 3 | 540.94  | -14.46 |
| Q13885 TBB2A_HUMAN Tubulin beta-2A chain    | 5  |                                                                                                               | IREEYPDR                                      | 154 | 8  | 6  | 36.08 | b2b4b7y1y3y8                                         | 1077.53 | 25.572  | 26155  | 2 | 539.27  | -3.40  |
| Q13885 TBB2A_HUMAN Tubulin beta-2A chain    | 6  |                                                                                                               | MSATFIGNSTAIQELFK                             | 362 | 17 | 6  | 46.45 | b7b9*b9b13b14b16                                     | 1857.95 | 93.357  | 5352   | 2 | 929.48  | 4.07   |
| Q13885 TBB2A_HUMAN Tubulin beta-2A chain    | 7  |                                                                                                               | INVYYNEAAGNK                                  | 46  | 12 | 5  | 32.16 | b5b7y8*y8y11                                         | 1355.67 | 62.828  | 3817   | 2 | 678.34  | 8.82   |
| Q13885 TBB2A_HUMAN Tubulin beta-2A chain    | 8  |                                                                                                               | MSATFIGNSTAIQELFKR                            | 362 | 18 | 4  | 22.73 | b7b12*b12b16                                         | 2014.04 | 71.913  | 3284   | 2 | 1007.52 | -3.52  |
| Q13885 TBB2A_HUMAN Tubulin beta-2A chain    | 9  | Carbamidomethyl+C(23)                                                                                         | LTTPTYGDLNHLVSATMSGVTTC<br>LRFPGQLNADLR       | 216 | 35 | 6  | 34.8  | b6b9*b9b10y6y7                                       | 3819.90 | 134.427 | 5777   | 3 | 1273.97 | -4.41  |
| Q13885 TBB2A_HUMAN Tubulin beta-2A chain    | 10 | Oxidation+M()                                                                                                 | ISEQFTAMFRR                                   | 380 | 11 | 4  | 27.3  | b7*b7y7y8                                            | 1401.70 | 52.306  | 28087  | 2 | 701.35  | 4.09   |
| Q15942 ZYX_HUMAN Zyxin                      | 1  | Carbamidomethyl+C(10);Carbamidomethyl+C(13);Carbamidomethyl+C(16);Carbamidomethyl+C(34);Carbamidomethyl+C(37) | ALGQLFHIACTCHQCAQLQGG<br>QFYSLEGAPYCEGCYTDLEK | 399 | 44 | 11 | 44.59 | b3b12b13b15b21b31y3y7y9y11y13                        | 5228.34 | 87.453  | 75417  | 4 | 1307.84 | 6.16   |
| Q15942 ZYX_HUMAN Zyxin                      | 2  |                                                                                                               | LGHPEALSAGTGPSPSFTYAQQ<br>R                   | 295 | 25 | 13 | 57.52 | b3b7b11b13b15y5y8*y8y11*y11*y11y12y25                | 2597.27 | 57.033  | 70764  | 3 | 866.43  | -0.56  |
| Q15942 ZYX_HUMAN Zyxin                      | 3  | Carbamidomethyl+C(9)                                                                                          | QNVAVNELCGR                                   | 375 | 11 | 8  | 55.48 | b3*b3b4*b4y4y6y8y11                                  | 1259.62 | 42.755  | 38825  | 2 | 630.31  | 1.94   |
| Q15942 ZYX_HUMAN Zyxin                      | 4  |                                                                                                               | SPGAPGLTLK                                    | 343 | 11 | 4  | 27.3  | b3b4y2y7                                             | 1037.60 | 50.365  | 27545  | 2 | 519.30  | -2.35  |
| Q15942 ZYX_HUMAN Zyxin                      | 5  |                                                                                                               | VNPFPRPGDSEPPAPGAQR                           | 35  | 19 | 5  | 21.88 | b2y5y8y17y19                                         | 1988.98 | 45.756  | 26806  | 3 | 663.67  | -5.28  |
| Q15942 ZYX_HUMAN Zyxin                      | 6  |                                                                                                               | GPPASSAPAPK                                   | 253 | 12 | 6  | 44.89 | y1y4y8y9y10y12                                       | 1076.57 | 23.900  | 14991  | 2 | 538.79  | -4.76  |
| Q15942 ZYX_HUMAN Zyxin                      | 7  |                                                                                                               | FSPGAPGGSGSQPNQK                              | 279 | 16 | 15 | 79.66 | b5b9b11b12b16y4y7y9*y9y10*y10*y10y11*y14*y14         | 1515.72 | 29.523  | 11558  | 2 | 758.36  | 1.85   |
| Q15942 ZYX_HUMAN Zyxin                      | 8  |                                                                                                               | EVEELEQLTQQLMQDMEHPQR                         | 354 | 21 | 7  | 21.68 | b11*b11y6*y6y11y13*y13                               | 2611.24 | 69.551  | 3206   | 2 | 1306.12 | 9.26   |
| Q15942 ZYX_HUMAN Zyxin                      | 9  |                                                                                                               | VSSIDLEIDSLSLDDMTKNDPDK                       | 140 | 25 | 5  | 12.4  | b7y3y5*y5*y5                                         | 2782.36 | 124.396 | 7561   | 3 | 928.12  | -4.30  |
| Q15942 ZYX_HUMAN Zyxin                      | 10 | Carbamidomethyl+C(30)                                                                                         | EVEELEQLTQQLMQDMEHPQRQ<br>NAVNELCGR           | 354 | 32 | 7  | 37.9  | b8b10y10*y10y11*y11y12                               | 3851.79 | 134.440 | 6533   | 4 | 963.70  | -4.50  |
| Q15942 ZYX_HUMAN Zyxin                      | 11 |                                                                                                               | VQEKGHPVPPAQNQNQVR                            | 324 | 19 | 4  | 14.93 | b6*b6y3y7                                            | 2194.13 | 59.521  | 2509   | 2 | 1097.57 | -9.79  |
| Q15942 ZYX_HUMAN Zyxin                      | 12 | Phosphoryl STY(13)                                                                                            | MAAPRPSAIVSVSAPAFYAPQK                        | 0   | 24 | 8  | 30.32 | b3b13*b13b15*b15y10y12y14                            | 2523.25 | 99.986  | 5050   | 2 | 1262.13 | 6.39   |
| Q15942 ZYX_HUMAN Zyxin                      | 13 | Oxidation+M()                                                                                                 | EVEELEQLTQQLMQDMEHPQR                         | 354 | 21 | 3  | 13.86 | b3b8y6                                               | 2627.21 | 101.266 | 9963   | 4 | 657.56  | 1.12   |
| Q15942 ZYX_HUMAN Zyxin                      | 14 |                                                                                                               | GTGSPQPPSFTYAQQR                              | 304 | 16 | 0  | 8.1   |                                                      | 1721.82 | 57.045  | 1766   | 3 | 574.61  | -1.84  |

|                                             |    |                       |                          |     |    |    |        |                                                         |         |        |        |   |         |        |
|---------------------------------------------|----|-----------------------|--------------------------|-----|----|----|--------|---------------------------------------------------------|---------|--------|--------|---|---------|--------|
| P06753 TPM3_HUMAN Tropomyosin alpha-3 chain | 1  |                       | IQLVEEELDR               | 91  | 10 | 17 | 114.92 | b2*b2b3b4y1y2y3y4°y4y5y6y7y8y9°y9*y9y10                 | 1243.65 | 59.447 | 345185 | 2 | 622.33  | -1.47  |
| P06753 TPM3_HUMAN Tropomyosin alpha-3 chain | 2  |                       | AADAEAEVASLNRR           | 77  | 14 | 4  | 34.83  | y9*y9y10y11                                             | 1472.73 | 38.852 | 60156  | 3 | 491.58  | -9.37  |
| P06753 TPM3_HUMAN Tropomyosin alpha-3 chain | 3  |                       | LATALQK                  | 105 | 7  | 10 | 80.09  | b3°b3b4°b4y1y3y4y5y6y7                                  | 744.45  | 29.010 | 24253  | 2 | 372.73  | -12.30 |
| P06753 TPM3_HUMAN Tropomyosin alpha-3 chain | 4  |                       | AADAEAEVASLNR            | 77  | 13 | 5  | 32.29  | b4y5y6y8y13                                             | 1316.64 | 41.650 | 12619  | 2 | 658.83  | -0.37  |
| P06753 TPM3_HUMAN Tropomyosin alpha-3 chain | 5  |                       | AISEELDHALNDMTSI         | 268 | 16 | 9  | 59.92  | b4b7°b7b9b13y7°y7y13y14                                 | 1758.81 | 69.565 | 11615  | 3 | 586.94  | -8.54  |
| P06753 TPM3_HUMAN Tropomyosin alpha-3 chain | 6  |                       | YEEEIK                   | 220 | 6  | 4  | 43.05  | b3b5°b5y4                                               | 810.38  | 26.190 | 17409  | 2 | 405.69  | -8.66  |
| P06753 TPM3_HUMAN Tropomyosin alpha-3 chain | 7  |                       | MEAIK                    | 0   | 5  | 1  | 13.21  | y4                                                      | 591.32  | 40.571 | 16712  | 1 | 591.32  | -0.93  |
| P06753 TPM3_HUMAN Tropomyosin alpha-3 chain | 8  |                       | VIENR                    | 128 | 5  | 2  | 13.21  | b4°b4                                                   | 630.36  | 28.145 | 13735  | 1 | 630.36  | -1.94  |
| P06753 TPM3_HUMAN Tropomyosin alpha-3 chain | 9  |                       | AEQAEAEQK                | 21  | 9  | 4  | 44.93  | b4b8y5y6                                                | 1003.45 | 58.398 | 10768  | 2 | 502.23  | -21.78 |
| P06753 TPM3_HUMAN Tropomyosin alpha-3 chain | 10 |                       | ENALDR                   | 15  | 6  | 1  | 13.62  | y5                                                      | 717.35  | 79.668 | 10320  | 1 | 717.35  | -1.96  |
| P06753 TPM3_HUMAN Tropomyosin alpha-3 chain | 11 |                       | QLEDELAAMQK              | 37  | 11 | 5  | 36.71  | b3°b3y4y5y10                                            | 1275.64 | 50.810 | 9809   | 2 | 638.33  | 14.74  |
| P06753 TPM3_HUMAN Tropomyosin alpha-3 chain | 12 |                       | LELAEK                   | 70  | 6  | 1  | 13.62  | b5                                                      | 702.40  | 40.396 | 1956   | 1 | 702.40  | -10.60 |
| P06753 TPM3_HUMAN Tropomyosin alpha-3 chain | 13 |                       | TIDDLEDELYAQKLK          | 251 | 15 | 4  | 26.21  | b3b4b11°b11                                             | 1793.90 | 87.336 | 81197  | 2 | 897.45  | -10.75 |
| P06753 TPM3_HUMAN Tropomyosin alpha-3 chain | 14 |                       | KLVIIEGDLER              | 167 | 11 | 4  | 27.3   | b4y5°y5y6                                               | 1284.74 | 57.733 | 20284  | 2 | 642.88  | -6.84  |
| P06753 TPM3_HUMAN Tropomyosin alpha-3 chain | 15 |                       | AADAEAEVASLNRR           | 77  | 14 | 3  | 19.27  | b6b9y6                                                  | 1472.76 | 33.480 | 11879  | 3 | 491.59  | 8.12   |
| P06753 TPM3_HUMAN Tropomyosin alpha-3 chain | 16 | Carbamidomethyl+C(8)  | AELAESKCSLEEEELK         | 182 | 16 | 3  | 17.15  | b11y10y15                                               | 1864.91 | 79.632 | 9635   | 2 | 932.96  | 11.65  |
| P06753 TPM3_HUMAN Tropomyosin alpha-3 chain | 17 |                       | AADAEAEVASLNRR           | 77  | 14 | 0  | 3.64   |                                                         | 1454.72 | 38.848 | 8380   | 3 | 485.58  | -4.95  |
| P67936 TPM4_HUMAN Tropomyosin alpha-4 chain | 1  |                       | IQLVEEELDR               | 55  | 10 | 17 | 114.92 | b2*b2b3b4y1y2y3y4°y4y5y6y7y8y9°y9*y9y10                 | 1243.65 | 59.447 | 345185 | 2 | 622.33  | -1.47  |
| P67936 TPM4_HUMAN Tropomyosin alpha-4 chain | 2  |                       | IQALQQQADEAEDR           | 13  | 14 | 21 | 123.73 | b2*b2b3*b3b4y1y2y3y4y5°y5y8y9°y9*y9y10*y10y11*y11y12y14 | 1614.78 | 39.964 | 104719 | 2 | 807.89  | 3.78   |
| P67936 TPM4_HUMAN Tropomyosin alpha-4 chain | 3  |                       | LATALQK                  | 69  | 7  | 10 | 80.09  | b3°b3b4°b4y1y3y4y5y6y7                                  | 744.45  | 29.010 | 24253  | 2 | 372.73  | -12.30 |
| P67936 TPM4_HUMAN Tropomyosin alpha-4 chain | 4  |                       | LVILEGELER               | 132 | 10 | 4  | 28.65  | b3y7°y7y8                                               | 1170.66 | 67.258 | 26235  | 2 | 585.84  | -7.09  |
| P67936 TPM4_HUMAN Tropomyosin alpha-4 chain | 5  |                       | AEGDVAALNR               | 44  | 10 | 4  | 26.89  | b7°b7y4y8                                               | 1015.51 | 33.611 | 25832  | 2 | 508.26  | -4.87  |
| P67936 TPM4_HUMAN Tropomyosin alpha-4 chain | 6  | Carbamidomethyl+C(19) | EENVGLHQLDQTLNELNCI      | 228 | 20 | 4  | 22.6   | b10y4y10y13                                             | 2340.07 | 87.971 | 4447   | 2 | 1170.54 | -18.15 |
| P67936 TPM4_HUMAN Tropomyosin alpha-4 chain | 7  |                       | NVTNNLKSLEAASEK          | 162 | 15 | 5  | 18.12  | b3°b3*b3b8y12                                           | 1617.85 | 89.946 | 192002 | 2 | 809.43  | 4.30   |
| P67936 TPM4_HUMAN Tropomyosin alpha-4 chain | 8  |                       | KIQALQQQADEAEDR          | 12  | 15 | 4  | 31.8   | b3b5y6y7                                                | 1742.86 | 37.221 | 48169  | 3 | 581.62  | -5.32  |
| P67936 TPM4_HUMAN Tropomyosin alpha-4 chain | 9  |                       | EKAEGDVAALNR             | 42  | 12 | 5  | 36.14  | b3b8y8y9°y9                                             | 1272.64 | 31.089 | 4559   | 2 | 636.83  | -7.48  |
| P67936 TPM4_HUMAN Tropomyosin alpha-4 chain | 10 | Carbamidomethyl+C(24) | LAQAKEENVGLHQLDQTLNELNCI | 223 | 25 | 6  | 23.08  | b3*b3y4y7°y7y8                                          | 2851.38 | 94.613 | 2655   | 2 | 1426.20 | -14.38 |

|                                              |    |                       |                                 |     |    |    |       |                                                     |         |         |        |   |         |        |
|----------------------------------------------|----|-----------------------|---------------------------------|-----|----|----|-------|-----------------------------------------------------|---------|---------|--------|---|---------|--------|
| [P67936]TPM4_HUMAN Tropomyosin alpha-4 chain | 11 |                       | SLEAASEKYSEK                    | 169 | 12 | 3  | 22.26 | b9y3y9                                              | 1341.66 | 114.432 | 1755   | 2 | 671.33  | 4.37   |
| [P67936]TPM4_HUMAN Tropomyosin alpha-4 chain | 12 |                       | ELDGERER                        | 33  | 8  | 3  | 36.08 | b3b6y6                                              | 1003.47 | 100.637 | 1606   | 1 | 1003.47 | -5.47  |
| [P67936]TPM4_HUMAN Tropomyosin alpha-4 chain | 13 |                       | LATALQK                         | 69  | 7  | 0  | 0.81  |                                                     | 726.44  | 29.012  | 4080   | 2 | 363.72  | -7.73  |
| [Q6PEY2]TBA3E_HUMAN Tubulin alpha-3E chain   | 1  |                       | VGINYQPPTVVPGGDLAK              | 352 | 18 | 15 | 94.35 | b5*b5b6b7b8b10b11°b11y1y2y3y7y8y12y18               | 1824.99 | 65.865  | 221198 | 2 | 913.00  | 1.54   |
| [Q6PEY2]TBA3E_HUMAN Tubulin alpha-3E chain   | 2  |                       | NLDIERPTYTNLNR                  | 215 | 14 | 18 | 81.07 | b2*b2b3b5°b5*b5b11*y2y3y4*y4y6y7y8*y8y12y14*y14     | 1718.86 | 52.848  | 136360 | 3 | 573.63  | -11.29 |
| [Q6PEY2]TBA3E_HUMAN Tubulin alpha-3E chain   | 3  | Carbamidomethyl+C(15) | AYHEQLSVAEITNACFEPANQMV<br>K    | 280 | 24 | 7  | 39.61 | b3b7b9b10y7y9y11                                    | 2750.30 | 73.543  | 69795  | 3 | 917.44  | 4.70   |
| [Q6PEY2]TBA3E_HUMAN Tubulin alpha-3E chain   | 4  |                       | FDGALNVDLTFEQTNLVPYPR           | 243 | 21 | 10 | 44.02 | b2b3b5b17y2y4y5y12y14y21                            | 2409.23 | 94.898  | 47635  | 2 | 1205.12 | 8.92   |
| [Q6PEY2]TBA3E_HUMAN Tubulin alpha-3E chain   | 5  |                       | EDLAALEK                        | 422 | 8  | 8  | 33.07 | b3b4b8y2°y2y3°y3y8                                  | 888.47  | 35.470  | 33015  | 2 | 444.74  | 4.95   |
| [Q6PEY2]TBA3E_HUMAN Tubulin alpha-3E chain   | 6  | Phosphoryl STY()      | AVFVDLEPTVVDEVR                 | 64  | 15 | 11 | 85.44 | b13b14_H3PO4<br>b14°b14y6y8y10°y10y11y12y13°y13     | 1767.85 | 105.125 | 99092  | 2 | 884.43  | 1.04   |
| [Q6PEY2]TBA3E_HUMAN Tubulin alpha-3E chain   | 7  | Oxidation+M(12)       | WAFVHWYVYVGGEGEFSEAR            | 401 | 21 | 4  | 21.68 | b3b8b10y6                                           | 2532.10 | 96.336  | 6192   | 3 | 844.71  | 3.76   |
| [Q9BVA1]TBB2B_HUMAN Tubulin beta-2B chain    | 1  |                       | LAVNMVPPFR                      | 252 | 10 | 12 | 99.95 | b2b3b5y1y4y5y6y7*y7y8y9y10                          | 1143.63 | 72.920  | 246238 | 2 | 572.32  | -1.81  |
| [Q9BVA1]TBB2B_HUMAN Tubulin beta-2B chain    | 2  |                       | SGPFGQIFRPDNFVFGQSGAGNN<br>WAK  | 77  | 26 | 14 | 52.78 | b2b5b7°b7°b7b13b15y1y3y6y8y9y12y26                  | 2798.35 | 89.960  | 186213 | 3 | 933.45  | 1.40   |
| [Q9BVA1]TBB2B_HUMAN Tubulin beta-2B chain    | 3  | Carbamidomethyl+C(23) | LTTPTYGDLNHLVSATMSGVTTTC<br>LR  | 216 | 25 | 9  | 74.47 | y3y5y6y7y8y12y13y22y25                              | 2708.34 | 95.649  | 85886  | 3 | 903.45  | 0.18   |
| [Q9BVA1]TBB2B_HUMAN Tubulin beta-2B chain    | 4  |                       | LHFFMPGFAPLTSR                  | 262 | 14 | 9  | 79.14 | b2b3b4b8b9b13y3y5y12                                | 1620.81 | 89.791  | 44064  | 3 | 540.94  | -14.46 |
| [Q9BVA1]TBB2B_HUMAN Tubulin beta-2B chain    | 5  |                       | IREEYPDR                        | 154 | 8  | 6  | 36.08 | b2b4b7y1y3y8                                        | 1077.53 | 25.572  | 26155  | 2 | 539.27  | -3.40  |
| [Q9BVA1]TBB2B_HUMAN Tubulin beta-2B chain    | 6  |                       | MSATFIGNSTAIQELFK               | 362 | 17 | 6  | 46.45 | b7b9°b9b13b14b16                                    | 1857.95 | 93.357  | 5352   | 2 | 929.48  | 4.07   |
| [Q9BVA1]TBB2B_HUMAN Tubulin beta-2B chain    | 7  |                       | MSATFIGNSTAIQELFKR              | 362 | 18 | 4  | 22.73 | b7b12°b12b16                                        | 2014.04 | 71.913  | 3284   | 2 | 1007.52 | -3.52  |
| [Q9BVA1]TBB2B_HUMAN Tubulin beta-2B chain    | 8  |                       | NSSYFVEWIPNNVK                  | 336 | 14 | 4  | 19.27 | b9y6y13*y13                                         | 1696.84 | 81.360  | 69241  | 2 | 848.93  | 5.83   |
| [Q9BVA1]TBB2B_HUMAN Tubulin beta-2B chain    | 9  |                       | EVDEQMLNVQNK                    | 324 | 12 | 5  | 49.66 | b11y4y5y6y10                                        | 1446.69 | 47.295  | 33093  | 2 | 723.85  | 0.42   |
| [Q9BVA1]TBB2B_HUMAN Tubulin beta-2B chain    | 10 |                       | IMNTFSVMPSPK                    | 162 | 12 | 4  | 26.24 | b5*b5y10y11                                         | 1351.65 | 66.220  | 18246  | 2 | 676.33  | -19.42 |
| [Q9BVA1]TBB2B_HUMAN Tubulin beta-2B chain    | 11 |                       | INVYYNEATGNK                    | 46  | 12 | 3  | 22.26 | b4y5y10                                             | 1385.70 | 84.527  | 2963   | 2 | 693.35  | 21.50  |
| [Q9BVA1]TBB2B_HUMAN Tubulin beta-2B chain    | 12 |                       | IREEYPDR                        | 154 | 8  | 3  | 33.07 | b5b6y7                                              | 1077.53 | 37.023  | 29722  | 2 | 539.27  | -1.25  |
| [Q9BVA1]TBB2B_HUMAN Tubulin beta-2B chain    | 13 |                       | EVDEQMLNVQNKSSYFVEWIPN<br>NVK   | 324 | 26 | 4  | 12.13 | b12y4y13°y13                                        | 3124.49 | 110.913 | 2093   | 5 | 625.70  | -3.20  |
| [Q9BVA1]TBB2B_HUMAN Tubulin beta-2B chain    | 14 | Phosphoryl STY()      | FWEVISDEHGIDPTGSYHGSDSLQ<br>LER | 19  | 27 | 5  | 21.9  | b13_HPO3<br>b13°b13b14°b14y11_H3<br>PO4 y11         | 3182.39 | 98.019  | 5637   | 3 | 1061.47 | 9.44   |
| [P02768]ALBU_HUMAN Serum albumin             | 1  | Carbamidomethyl+C(3)  | YICENQDISSSK                    | 286 | 12 | 19 | 89.96 | b2b3b8°b8b9°b9°b9b11y2°y2y3y4y9°y9°y9y10°y10°y10y12 | 1443.64 | 33.855  | 924935 | 2 | 722.33  | 1.10   |
| [P02768]ALBU_HUMAN Serum albumin             | 2  |                       | LYYEIAR                         | 161 | 7  | 13 | 63.86 | b1b2b5°b5b7y1y2y3y4°y4y5y6y7                        | 927.49  | 52.144  | 774725 | 2 | 464.25  | -8.69  |

|                                 |    |                                                                   |                                 |     |    |    |        |                                                                                         |         |         |        |   |         |        |
|---------------------------------|----|-------------------------------------------------------------------|---------------------------------|-----|----|----|--------|-----------------------------------------------------------------------------------------|---------|---------|--------|---|---------|--------|
| P02768 ALBU_HUMAN Serum albumin | 3  | Carbamidomethyl+C(1); Carbamidomethyl+C(2)                        | CCTESLVNR                       | 499 | 9  | 15 | 88.09  | b2b7b9y2*y2y3*y3y4y5y6°y6y7°y7y8y9                                                      | 1138.49 | 32.694  | 115049 | 2 | 569.75  | -2.90  |
| P02768 ALBU_HUMAN Serum albumin | 4  | Carbamidomethyl+C(14)                                             | ALVLIAFAQYLQCPFEDHVK            | 44  | 21 | 19 | 112.82 | b2b3b4b5b6b18*b18y2y3y4y5°y5y7°y7y10y15y18*y18y21                                       | 2490.27 | 108.498 | 106448 | 3 | 830.76  | -4.61  |
| P02768 ALBU_HUMAN Serum albumin | 5  |                                                                   | VPQVSTPTLVEVSR                  | 438 | 14 | 8  | 72.13  | b1y3y8y9y10y11y12y14                                                                    | 1511.84 | 60.375  | 69761  | 2 | 756.42  | -4.60  |
| P02768 ALBU_HUMAN Serum albumin | 6  |                                                                   | FQNALLVR                        | 426 | 8  | 5  | 40.85  | b2y3y4y6y8                                                                              | 960.55  | 55.666  | 53509  | 2 | 480.78  | -9.28  |
| P02768 ALBU_HUMAN Serum albumin | 7  |                                                                   | LVNEVTEFAK                      | 65  | 10 | 6  | 54.88  | y3y5y6y8*y8y10                                                                          | 1149.61 | 54.798  | 46632  | 2 | 575.31  | -3.40  |
| P02768 ALBU_HUMAN Serum albumin | 8  | Carbamidomethyl+C(3)                                              | NECFLQHKDDNPNLPR                | 122 | 16 | 6  | 24.85  | y4*y4y6y9°y9*y9                                                                         | 1996.90 | 43.872  | 45562  | 4 | 499.98  | -14.55 |
| P02768 ALBU_HUMAN Serum albumin | 9  | Carbamidomethyl+C(6); Carbamidomethyl+C(7)                        | AAFTECCQAADK                    | 186 | 12 | 10 | 44.89  | b1y1y2y6y8y9°y9y10°y10y12                                                               | 1371.57 | 32.059  | 38758  | 2 | 686.29  | 0.45   |
| P02768 ALBU_HUMAN Serum albumin | 10 | Carbamidomethyl+C(9); Carbamidomethyl+C(10)                       | ETYGEMADCCAK                    | 105 | 12 | 4  | 29.46  | y6y8y9y12                                                                               | 1434.54 | 36.437  | 38012  | 2 | 717.77  | 1.70   |
| P02768 ALBU_HUMAN Serum albumin | 11 |                                                                   | AEFAEVSK                        | 249 | 8  | 9  | 51.06  | b2b3b4b8°b8y4°y4y6y8                                                                    | 880.44  | 33.568  | 35787  | 2 | 440.72  | -4.78  |
| P02768 ALBU_HUMAN Serum albumin | 12 | Carbamidomethyl+C(2)                                              | LCTVATLR                        | 97  | 8  | 4  | 40.85  | y3y4°y4y6                                                                               | 933.52  | 43.884  | 16541  | 2 | 467.26  | -3.92  |
| P02768 ALBU_HUMAN Serum albumin | 13 | Carbamidomethyl+C(2); Carbamidomethyl+C(11)                       | TCVADESAENCDK                   | 75  | 13 | 13 | 105.92 | b1°b1b2b4b6y5y6*y6y7y8y9y10y11                                                          | 1498.58 | 22.609  | 14670  | 2 | 749.79  | 0.08   |
| P02768 ALBU_HUMAN Serum albumin | 14 |                                                                   | FKDLGEENFK                      | 34  | 10 | 4  | 54.88  | y3y4y7y9                                                                                | 1226.59 | 79.606  | 5807   | 2 | 613.80  | -14.03 |
| P02768 ALBU_HUMAN Serum albumin | 15 |                                                                   | LVTDLTK                         | 257 | 7  | 9  | 66.87  | b4°b4b5y4°y4y5°y5y6°y6                                                                  | 789.45  | 38.985  | 612867 | 2 | 395.23  | -21.57 |
| P02768 ALBU_HUMAN Serum albumin | 16 |                                                                   | DVFLGMFLYEYAR                   | 347 | 13 | 4  | 32.29  | b7y4y5y12                                                                               | 1623.82 | 67.403  | 39583  | 3 | 541.94  | 17.89  |
| P02768 ALBU_HUMAN Serum albumin | 17 | Carbamidomethyl+C(14)                                             | EFNAETFTFHADICTLSEK             | 524 | 19 | 3  | 22.71  | b13b14y6                                                                                | 2260.06 | 100.617 | 7890   | 3 | 754.02  | 14.69  |
| P02768 ALBU_HUMAN Serum albumin | 18 |                                                                   | SEVAHR                          | 28  | 6  | 2  | 29.84  | y3y5                                                                                    | 698.35  | 30.891  | 7388   | 2 | 349.68  | -13.81 |
| P02768 ALBU_HUMAN Serum albumin | 19 | Carbamidomethyl+C(3)                                              | SHCIAEVENDEMPADLPSLAADFV<br>ESK | 310 | 27 | 4  | 22.54  | b15y10y11y15                                                                            | 2974.38 | 92.256  | 2324   | 2 | 1487.69 | 10.59  |
| P02768 ALBU_HUMAN Serum albumin | 20 |                                                                   | KVPQVSTPTLVEVSR                 | 437 | 15 | 31 | 244.3  | b4*b4b5*b5b7°b7b9°b9b10*b10b11b13y3y4°y4y5°y5y6y7y8°y8y9y10°y10y11°y11y12*y12y13°y13y14 | 1639.92 | 55.556  | 950776 | 3 | 547.31  | -9.75  |
| P02768 ALBU_HUMAN Serum albumin | 21 | Carbamidomethyl+C(4); Carbamidomethyl+C(17)                       | RMPCAEDYLSVVLNQLCVLHEK          | 468 | 22 | 4  | 13.43  | b5b13y8*y8                                                                              | 2674.32 | 103.728 | 77696  | 3 | 892.11  | 3.47   |
| P02768 ALBU_HUMAN Serum albumin | 22 | Carbamidomethyl+C(13); Carbamidomethyl+C(14)                      | AVMDDFAAFVEKCKK                 | 569 | 15 | 3  | 18.12  | b13y7y13                                                                                | 1790.78 | 60.391  | 49556  | 2 | 895.89  | -5.18  |
| P02768 ALBU_HUMAN Serum albumin | 23 | Carbamidomethyl+C(3); Carbamidomethyl+C(16)                       | MPCAEDYLSVVLNQLCVLHEKTP<br>VSDR | 469 | 27 | 3  | 11.9   | b13b15y22                                                                               | 3173.53 | 72.841  | 15976  | 5 | 635.51  | -5.31  |
| P02768 ALBU_HUMAN Serum albumin | 24 | Carbamidomethyl+C(1); Carbamidomethyl+C(2); Carbamidomethyl+C(12) | CCTESLVNRRPCFSALEVDETYVP<br>K   | 499 | 25 | 4  | 12.4   | b12y7y9°y9                                                                              | 3030.41 | 68.254  | 15478  | 4 | 758.36  | -0.56  |

|                                 |    |                                                                         |                                           |      |    |    |        |                                                                                                         |         |         |        |   |         |        |
|---------------------------------|----|-------------------------------------------------------------------------|-------------------------------------------|------|----|----|--------|---------------------------------------------------------------------------------------------------------|---------|---------|--------|---|---------|--------|
| P02768 ALBU_HUMAN Serum albumin | 25 | Carbamidomethyl+C(2);<br>Carbamidomethyl+C(3);<br>Carbamidomethyl+C(13) | ECCEKPLLEKSHCIAEVENDEMPA<br>DLPSLAADFVESK | 300  | 37 | 4  | 10.87  | b11°b11y8y22                                                                                            | 4260.92 | 115.312 | 13684  | 4 | 1065.98 | -6.42  |
| P02768 ALBU_HUMAN Serum albumin | 26 |                                                                         | EQLKAVMDDFAAFVEK                          | 565  | 16 | 4  | 34.55  | b8b9b10°b10                                                                                             | 1840.92 | 86.716  | 12803  | 2 | 920.96  | 1.13   |
| P02768 ALBU_HUMAN Serum albumin | 27 |                                                                         | NYAEAKDVFLGMFLYEYAR                       | 341  | 19 | 8  | 42.02  | b10b11°b11b12°b12y4y<br>10°y10                                                                          | 2300.09 | 68.184  | 10451  | 2 | 1150.55 | -5.31  |
| P02768 ALBU_HUMAN Serum albumin | 28 | Carbamidomethyl+C(5);<br>Carbamidomethyl+C(6);<br>Carbamidomethyl+C(13) | VHTECCHGDLLECADDRADLAK                    | 264  | 22 | 4  | 26.9   | b3b14y10y11                                                                                             | 2585.12 | 44.193  | 9736   | 3 | 862.38  | -0.19  |
| P02768 ALBU_HUMAN Serum albumin | 29 | Carbamidomethyl+C(3)                                                    | DVCKNYAEAK                                | 337  | 10 | 3  | 26.89  | b6b9y3                                                                                                  | 1197.55 | 37.411  | 9592   | 3 | 399.85  | -6.22  |
| P02768 ALBU_HUMAN Serum albumin | 30 |                                                                         | LYYEIARR                                  | 161  | 8  | 3  | 40.85  | b3b4b5                                                                                                  | 1083.58 | 62.940  | 8537   | 2 | 542.29  | -13.52 |
| P02768 ALBU_HUMAN Serum albumin | 31 | Carbamidomethyl+C(6);<br>Carbamidomethyl+C(7);<br>Carbamidomethyl+C(15) | AAFTECCQAADKAACLLPK                       | 186  | 19 | 3  | 14.93  | b12y7y13                                                                                                | 2124.97 | 63.618  | 8389   | 3 | 708.99  | -10.57 |
| P02768 ALBU_HUMAN Serum albumin | 32 |                                                                         | FKDLGEEENFK                               | 34   | 10 | 3  | 28.65  | b5b6y8                                                                                                  | 1226.62 | 48.178  | 3764   | 2 | 613.81  | 8.96   |
| P02768 ALBU_HUMAN Serum albumin | 33 | Carbamidomethyl+C(3)                                                    | NECFLQHKDDNPNLPR                          | 122  | 16 | 4  | 38.85  | y7y10y12y14                                                                                             | 1996.90 | 100.024 | 3724   | 3 | 666.30  | -14.92 |
| P02768 ALBU_HUMAN Serum albumin | 34 | Oxidation+M(6)                                                          | DVFLGMFLYEYAR                             | 347  | 13 | 5  | 34.05  | b6y4y7y10°y10                                                                                           | 1639.77 | 77.394  | 4101   | 2 | 820.39  | -9.53  |
| P02768 ALBU_HUMAN Serum albumin | 35 | Carbamidomethyl+C(10);<br>Oxidation+M(9)                                | LVRPEVDVMCTAFHDNEETFLK                    | 138  | 22 | 3  | 22.18  | b11y7y8                                                                                                 | 2666.27 | 78.439  | 3640   | 5 | 534.06  | 3.66   |
| P02768 ALBU_HUMAN Serum albumin | 36 | Oxidation+M(12)                                                         | NYAEAKDVFLGMFLYEYAR                       | 341  | 19 | 5  | 25.85  | b7y5y9°y9y10                                                                                            | 2316.07 | 83.009  | 3591   | 2 | 1158.54 | -14.13 |
| P02768 ALBU_HUMAN Serum albumin | 37 |                                                                         | LVNEVTEF                                  | 65   | 8  | 1  | 8.25   | y4                                                                                                      | 950.48  | 54.734  | 59727  | 2 | 475.74  | -7.71  |
| P02768 ALBU_HUMAN Serum albumin | 38 |                                                                         | AEFAEVSK                                  | 249  | 8  | 0  | 1.21   |                                                                                                         | 862.43  | 33.606  | 7316   | 1 | 862.43  | 1.98   |
| Q7Z406 MYH14_HUMAN Myosin-14    | 1  |                                                                         | QLLQANPILEAFGNAK                          | 236  | 16 | 32 | 198.08 | b2°b2b3°b3b4°b4b5°b<br>5b6°b6b12b15b16y1y2y<br>4*y4y5y6y7°y7*y7y8y1<br>0*y10y11y12y13*y13y1<br>4*y14y16 | 1726.95 | 91.473  | 248530 | 2 | 863.98  | -1.63  |
| Q7Z406 MYH14_HUMAN Myosin-14    | 2  |                                                                         | KEEELQAALAR                               | 1104 | 11 | 19 | 129.79 | b2°b2b3°b3b4b6°b6b8y<br>1y4y5y7y8y9°y9y10°y1<br>0y11*y11                                                | 1257.67 | 43.025  | 73666  | 2 | 629.34  | -4.66  |
| Q7Z406 MYH14_HUMAN Myosin-14    | 3  |                                                                         | LQQLFNHTFMVLEQEEYQR                       | 501  | 19 | 7  | 37.17  | b8b11°b11b14y5y6y19                                                                                     | 2453.17 | 105.900 | 60829  | 4 | 614.05  | -10.45 |
| Q7Z406 MYH14_HUMAN Myosin-14    | 4  |                                                                         | LAQAEEQLEQETR                             | 1839 | 13 | 5  | 34.05  | b4b6b9y8y13                                                                                             | 1544.76 | 51.351  | 47142  | 2 | 772.88  | 1.50   |
| Q7Z406 MYH14_HUMAN Myosin-14    | 5  | Carbamidomethyl+C(1)                                                    | CNGVLEGIR                                 | 717  | 9  | 7  | 54.47  | b2°b2y3y4y5y7y9                                                                                         | 1017.51 | 49.140  | 45436  | 2 | 509.26  | -2.88  |
| Q7Z406 MYH14_HUMAN Myosin-14    | 6  |                                                                         | FEEDLLLLLEDQNSK                           | 999  | 14 | 6  | 27.55  | b11b13y5y12°y12*y12                                                                                     | 1692.81 | 100.587 | 44195  | 2 | 846.91  | -10.74 |
| Q7Z406 MYH14_HUMAN Myosin-14    | 7  |                                                                         | EEELQAALAR                                | 1105 | 10 | 6  | 40.11  | b6y3y5y6y10*y10                                                                                         | 1129.58 | 49.841  | 39172  | 2 | 565.30  | -0.32  |
| Q7Z406 MYH14_HUMAN Myosin-14    | 8  |                                                                         | LQQHIQLEAHLEAEEGAR                        | 964  | 19 | 3  | 14.93  | b3y3y6                                                                                                  | 2201.11 | 103.326 | 4725   | 3 | 734.37  | 5.55   |
| Q7Z406 MYH14_HUMAN Myosin-14    | 9  |                                                                         | LQQELDDATMDLEQQR                          | 1441 | 16 | 9  | 34.74  | b1b2b3b10°b10y5y7y13<br>*y13                                                                            | 1932.91 | 87.411  | 4279   | 2 | 966.96  | 7.45   |

|                              |    |  |                         |      |    |    |       |                                               |         |         |        |   |         |        |
|------------------------------|----|--|-------------------------|------|----|----|-------|-----------------------------------------------|---------|---------|--------|---|---------|--------|
| Q7Z406 MYH14_HUMAN Myosin-14 | 10 |  | ELQTAQAQLSEWRR          | 1381 | 14 | 5  | 24.71 | b7b8°b8*b8y11                                 | 1715.87 | 47.296  | 3611   | 2 | 858.44  | -8.96  |
| Q7Z406 MYH14_HUMAN Myosin-14 | 11 |  | GPSAGGGPGSGTSPQVEWTAR   | 32   | 21 | 5  | 27.36 | b4b18°b18y11y12                               | 1955.90 | 69.554  | 135268 | 3 | 652.64  | -10.92 |
| Q7Z406 MYH14_HUMAN Myosin-14 | 12 |  | QEEEAGALEAGEEAR         | 1396 | 15 | 4  | 18.12 | b10*b10y5y13                                  | 1588.72 | 52.286  | 102002 | 3 | 530.25  | 9.84   |
| Q7Z406 MYH14_HUMAN Myosin-14 | 13 |  | QLPIYTEAIVEMYR          | 149  | 14 | 3  | 19.27 | b3b9y10                                       | 1725.87 | 85.860  | 36817  | 3 | 575.96  | -9.76  |
| Q7Z406 MYH14_HUMAN Myosin-14 | 14 |  | ELQTAQAQLSEWR           | 1381 | 13 | 4  | 32.29 | b10y3y4y8                                     | 1559.78 | 66.025  | 29296  | 2 | 780.39  | 0.23   |
| Q7Z406 MYH14_HUMAN Myosin-14 | 15 |  | LMATLSNTNPSFVR          | 680  | 14 | 14 | 74.67 | b5b11°b11*b11y7°y7y8<br>*y8y9°y9*y9y10y11*y11 | 1550.83 | 116.609 | 14048  | 2 | 775.92  | 18.26  |
| Q7Z406 MYH14_HUMAN Myosin-14 | 16 |  | LQEELAASDR              | 1708 | 10 | 6  | 54.29 | b6b7y4y7°y7y8                                 | 1131.58 | 28.802  | 8255   | 3 | 377.87  | 17.48  |
| Q7Z406 MYH14_HUMAN Myosin-14 | 17 |  | GAWEK                   | 1236 | 5  | 1  | 13.21 | y4                                            | 590.30  | 30.875  | 7075   | 1 | 590.30  | 9.51   |
| Q7Z406 MYH14_HUMAN Myosin-14 | 18 |  | FLTNGPSSSPGQER          | 328  | 14 | 4  | 24.71 | b13y4y5*y5                                    | 1476.73 | 55.453  | 6318   | 2 | 738.87  | 12.15  |
| Q7Z406 MYH14_HUMAN Myosin-14 | 19 |  | ASISYGSNMRPQSQTWR       | 1040 | 17 | 6  | 26.13 | b14y4°y4y7y9°y9                               | 1968.95 | 119.206 | 5623   | 3 | 656.99  | 8.00   |
| Q7Z406 MYH14_HUMAN Myosin-14 | 20 |  | QMQTEK                  | 956  | 6  | 1  | 13.62 | b4                                            | 764.36  | 26.868  | 5047   | 1 | 764.36  | -2.16  |
| Q7Z406 MYH14_HUMAN Myosin-14 | 21 |  | HEVPPHVYAVTEGAYR        | 167  | 16 | 6  | 27.65 | b4°b4b10b14y11°y11                            | 1824.90 | 61.256  | 4946   | 3 | 608.97  | 1.07   |
| Q7Z406 MYH14_HUMAN Myosin-14 | 22 |  | VADQLR                  | 1880 | 6  | 1  | 13.62 | y5                                            | 701.39  | 42.022  | 4897   | 2 | 351.20  | -3.05  |
| Q7Z406 MYH14_HUMAN Myosin-14 | 23 |  | VAEQAANDLR              | 1552 | 10 | 6  | 26.89 | b7*b7y6°y6y9°y9                               | 1086.54 | 71.981  | 4735   | 2 | 543.77  | -13.03 |
| Q7Z406 MYH14_HUMAN Myosin-14 | 24 |  | HGQALGELAEQLEQAR        | 1217 | 16 | 3  | 17.15 | b5b14y11                                      | 1749.86 | 91.450  | 4267   | 4 | 438.22  | -16.39 |
| Q7Z406 MYH14_HUMAN Myosin-14 | 25 |  | NTDQATMPDNTAAQK         | 384  | 15 | 3  | 18.12 | b8y6y11                                       | 1605.72 | 51.681  | 3868   | 2 | 803.36  | -0.08  |
| Q7Z406 MYH14_HUMAN Myosin-14 | 26 |  | VLGFSHEEIIISMLR         | 353  | 14 | 4  | 30.72 | b8b9b11y4                                     | 1630.83 | 37.080  | 3865   | 4 | 408.46  | -20.81 |
| Q7Z406 MYH14_HUMAN Myosin-14 | 27 |  | QEGEQR                  | 1264 | 6  | 1  | 13.62 | b4                                            | 746.34  | 39.881  | 3718   | 1 | 746.34  | -4.01  |
| Q7Z406 MYH14_HUMAN Myosin-14 | 28 |  | AQVTELEDELTAEDAQK       | 1562 | 17 | 6  | 22.9  | b7°b7*b7b12y6y10                              | 1832.89 | 66.612  | 3701   | 3 | 611.64  | 8.99   |
| Q7Z406 MYH14_HUMAN Myosin-14 | 29 |  | AQELQK                  | 874  | 6  | 1  | 13.62 | b3                                            | 716.39  | 40.763  | 3468   | 1 | 716.39  | -9.54  |
| Q7Z406 MYH14_HUMAN Myosin-14 | 30 |  | DQLEK                   | 1886 | 5  | 1  | 13.21 | y3                                            | 632.32  | 23.859  | 2961   | 1 | 632.32  | -11.29 |
| Q7Z406 MYH14_HUMAN Myosin-14 | 31 |  | QAQQDR                  | 1721 | 6  | 1  | 13.62 | y4                                            | 745.35  | 58.876  | 2931   | 1 | 745.35  | -11.05 |
| Q7Z406 MYH14_HUMAN Myosin-14 | 32 |  | ELEDVTESAESMNR          | 1922 | 14 | 3  | 27.84 | y4y6y12                                       | 1609.72 | 77.318  | 2852   | 2 | 805.36  | 12.74  |
| Q7Z406 MYH14_HUMAN Myosin-14 | 33 |  | AAVTMSVPGR              | 1    | 10 | 3  | 26.89 | b3b9y4                                        | 988.53  | 16.265  | 2377   | 2 | 494.77  | 6.54   |
| Q7Z406 MYH14_HUMAN Myosin-14 | 34 |  | LGQLEEELEEEQSSELLNDR    | 1754 | 21 | 5  | 21.68 | b4b7b9*b9y8                                   | 2474.18 | 99.963  | 2142   | 4 | 619.30  | 12.33  |
| Q7Z406 MYH14_HUMAN Myosin-14 | 35 |  | DVEGIVGLEQVSSLDGPPGGRPR | 639  | 24 | 5  | 16.85 | b9b14*b14y10y16                               | 2391.19 | 97.168  | 1899   | 2 | 1196.10 | -17.15 |
| Q7Z406 MYH14_HUMAN Myosin-14 | 36 |  | ALSLTRALEEEQEAR         | 1501 | 15 | 3  | 18.12 | b3b14y13                                      | 1715.88 | 87.686  | 29488  | 2 | 858.44  | -5.69  |
| Q7Z406 MYH14_HUMAN Myosin-14 | 37 |  | LQRAQAELENVSGALNEAESK   | 1298 | 21 | 6  | 40.87 | b8b14y9y10y11*y11                             | 2257.13 | 47.222  | 24915  | 3 | 753.05  | -3.46  |
| Q7Z406 MYH14_HUMAN Myosin-14 | 38 |  | AVEERER                 | 1483 | 7  | 3  | 37.44 | b4y5y6                                        | 888.46  | 43.736  | 18287  | 2 | 444.73  | 2.20   |



|                              |    |                                         |                            |      |    |   |       |                         |         |         |       |   |         |        |
|------------------------------|----|-----------------------------------------|----------------------------|------|----|---|-------|-------------------------|---------|---------|-------|---|---------|--------|
| Q7Z406 MYH14_HUMAN Myosin-14 | 39 |                                         | RQEEEAGALEAGEEAR           | 1395 | 16 | 4 | 37.35 | b8y5y6y7                | 1744.81 | 82.268  | 15925 | 2 | 872.91  | 2.80   |
| Q7Z406 MYH14_HUMAN Myosin-14 | 40 |                                         | RLQQLDDATMDLEQQR           | 1440 | 17 | 7 | 27.38 | b10*b10y7y8*y8y10*y10   | 2089.01 | 72.759  | 15113 | 3 | 697.01  | 8.18   |
| Q7Z406 MYH14_HUMAN Myosin-14 | 41 |                                         | QEEEGALEAGEEAR             | 1396 | 16 | 3 | 24.85 | y5y11y13                | 1744.82 | 66.810  | 11948 | 2 | 872.92  | 8.19   |
| Q7Z406 MYH14_HUMAN Myosin-14 | 42 |                                         | LGEEEDAGARAR               | 1817 | 11 | 5 | 41.48 | b3*b3b5b10y7            | 1144.56 | 33.519  | 9449  | 2 | 572.78  | -7.89  |
| Q7Z406 MYH14_HUMAN Myosin-14 | 43 |                                         | AQTKEQADFALEALAK           | 429  | 16 | 4 | 39.82 | b4b5b6b10               | 1733.89 | 91.451  | 8259  | 2 | 867.45  | -11.26 |
| Q7Z406 MYH14_HUMAN Myosin-14 | 44 |                                         | AQAELENVSGALNEAESKTIR      | 1301 | 21 | 4 | 20.51 | b4b6*b6b9               | 2230.10 | 32.061  | 7443  | 4 | 558.28  | -13.68 |
| Q7Z406 MYH14_HUMAN Myosin-14 | 45 |                                         | LGQLEEELEBEEQSNSELLNDRYR   | 1754 | 23 | 6 | 29.45 | b3b5b6*b6b12y13         | 2793.30 | 80.273  | 6681  | 2 | 1397.15 | -6.82  |
| Q7Z406 MYH14_HUMAN Myosin-14 | 46 |                                         | QLEEAEEEAASRAQAGR          | 1901 | 16 | 6 | 37.85 | b3b4*b4b10b12y10        | 1773.84 | 55.445  | 6158  | 2 | 887.43  | 4.68   |
| Q7Z406 MYH14_HUMAN Myosin-14 | 47 |                                         | QLEGRGLQLEEELEEEQSNSELLNDR | 1749 | 26 | 3 | 21.91 | b25y10y11               | 3057.44 | 101.849 | 5994  | 3 | 1019.82 | -8.06  |
| Q7Z406 MYH14_HUMAN Myosin-14 | 48 |                                         | RHEVPPHVYAVTEGAYR          | 166  | 17 | 3 | 16.3  | b10y10y12               | 1980.99 | 58.305  | 5747  | 4 | 496.00  | -8.75  |
| Q7Z406 MYH14_HUMAN Myosin-14 | 49 |                                         | KFEEDLLLLLEDQNSK           | 998  | 15 | 5 | 43.09 | b5b13b14y7y8            | 1820.92 | 105.122 | 5481  | 3 | 607.64  | -4.02  |
| Q7Z406 MYH14_HUMAN Myosin-14 | 50 |                                         | ELQTAQAQLSEWRR             | 1381 | 14 | 3 | 27.84 | y5y8y13                 | 1715.90 | 67.549  | 5147  | 3 | 572.64  | 10.53  |
| Q7Z406 MYH14_HUMAN Myosin-14 | 51 |                                         | MAAVTMSVPGRK               | 0    | 12 | 6 | 34.22 | b5b6*b6b8*b8y7          | 1247.67 | 109.958 | 4810  | 2 | 624.34  | 6.85   |
| Q7Z406 MYH14_HUMAN Myosin-14 | 52 |                                         | SRASISYGSNMRPQSQTWR        | 1038 | 19 | 8 | 40.84 | b9b13*b13y4y6*y6y13y17  | 2212.07 | 81.388  | 4448  | 3 | 738.03  | 2.32   |
| Q7Z406 MYH14_HUMAN Myosin-14 | 53 |                                         | LAETETVDR                  | 1424 | 10 | 4 | 26.89 | b3*b3b6y8               | 1161.63 | 35.735  | 3964  | 2 | 581.32  | 12.30  |
| Q7Z406 MYH14_HUMAN Myosin-14 | 54 |                                         | ELWREVEETR                 | 1672 | 10 | 5 | 55.54 | b5b8y7y8y9              | 1346.67 | 76.369  | 3749  | 2 | 673.84  | -2.54  |
| Q7Z406 MYH14_HUMAN Myosin-14 | 55 |                                         | EEELQAALARAEDEGGAR         | 1105 | 18 | 4 | 22.97 | b13*b13y14y15           | 1914.89 | 88.656  | 3467  | 4 | 479.48  | -14.79 |
| Q7Z406 MYH14_HUMAN Myosin-14 | 56 |                                         | VDYKANEWLMK                | 602  | 11 | 6 | 41.48 | b3*b3b6b10y5*y5         | 1396.71 | 102.580 | 3441  | 2 | 698.86  | 12.94  |
| Q7Z406 MYH14_HUMAN Myosin-14 | 57 |                                         | EQLEEEAAARER               | 1366 | 12 | 5 | 34.22 | b3b4*b4b10y11           | 1430.70 | 55.396  | 2855  | 3 | 477.57  | 9.21   |
| Q7Z406 MYH14_HUMAN Myosin-14 | 58 |                                         | DQIQRMNPPK                 | 93   | 10 | 5 | 42.84 | b7b8*b8y4y5             | 1226.62 | 36.917  | 2816  | 3 | 409.55  | -6.17  |
| Q7Z406 MYH14_HUMAN Myosin-14 | 59 |                                         | EVEETRISR                  | 1676 | 9  | 5 | 38.25 | b3*b3b4b8*b8            | 1106.55 | 26.842  | 2778  | 2 | 553.78  | 5.74   |
| Q7Z406 MYH14_HUMAN Myosin-14 | 60 |                                         | EEIFSQNRESEK               | 1685 | 12 | 3 | 22.26 | b3b11y4                 | 1495.72 | 16.278  | 2263  | 3 | 499.25  | 14.69  |
| Q7Z406 MYH14_HUMAN Myosin-14 | 61 |                                         | VAQEQGGHPKFQRR             | 571  | 15 | 8 | 41.46 | b6*b6*b6b8*b8b10*b10b13 | 1734.89 | 104.951 | 2063  | 2 | 867.95  | -12.88 |
| Q7Z406 MYH14_HUMAN Myosin-14 | 62 |                                         | HLRDQADFSVLHYAGK           | 586  | 16 | 4 | 24.85 | b8*b8b10b12             | 1856.97 | 69.623  | 1738  | 3 | 619.66  | 14.79  |
| Q7Z406 MYH14_HUMAN Myosin-14 | 63 |                                         | FLTNGPSSSPGQERELFQETLESLR  | 328  | 25 | 7 | 33.4  | b6*b6b10b14y8y9y14      | 2822.39 | 110.075 | 1681  | 4 | 706.35  | -2.94  |
| Q7Z406 MYH14_HUMAN Myosin-14 | 64 | Phosphoryl STY(9)                       | ELFQETLESLR                | 342  | 11 | 5 | 36.71 | b4b7b8y5*y5             | 1444.67 | 68.252  | 5703  | 3 | 482.23  | 3.72   |
| Q7Z406 MYH14_HUMAN Myosin-14 | 65 | Phosphoryl STY(12)                      | DVEGIVGLEQVSSLDGPPGGRPR    | 639  | 24 | 5 | 12.7  | b10*b10*b10y8y13        | 2471.18 | 136.383 | 2325  | 2 | 1236.09 | -0.79  |
| Q7Z406 MYH14_HUMAN Myosin-14 | 66 | Carbamidomethyl+C(13)<br>;Oxidation+M() | SMLQDREDQSILCTGESGAGK      | 183  | 21 | 3 | 13.86 | b3b17y17                | 2298.02 | 89.765  | 24415 | 3 | 766.68  | -7.12  |
| Q7Z406 MYH14_HUMAN Myosin-14 | 67 | Oxidation+M(5)                          | MQAQMKELWREVEETR           | 1666 | 16 | 4 | 24.24 | b4b8y4y6                | 2080.03 | 72.021  | 3565  | 2 | 1040.52 | 14.79  |

|                                                         |    |                      |                                                   |     |    |    |        |                                                    |         |         |        |   |         |        |
|---------------------------------------------------------|----|----------------------|---------------------------------------------------|-----|----|----|--------|----------------------------------------------------|---------|---------|--------|---|---------|--------|
| Q9BYX7 ACTK_HUMAN Kappa-actin                           | 1  |                      | QEYDESGPSIVHRK                                    | 359 | 14 | 19 | 139.44 | b3°b3*b3b14y2y3y4y5y6°y6y7y8y9y10°y10y11y12y14*y14 | 1644.78 | 32.265  | 409068 | 3 | 548.93  | -12.62 |
| Q9BYX7 ACTK_HUMAN Kappa-actin                           | 2  |                      | QEYDESGPSIVHR                                     | 359 | 13 | 14 | 111.95 | y1y2y3y4y5y6y8y9°y9y10y11°y11y13*y13               | 1516.68 | 38.036  | 189555 | 3 | 506.23  | -13.60 |
| Q9BYX7 ACTK_HUMAN Kappa-actin                           | 3  |                      | SYELPDGQVITIGNER                                  | 238 | 16 | 4  | 17.15  | b6y2y9y14                                          | 1790.87 | 71.932  | 24055  | 3 | 597.63  | -10.22 |
| Q9BYX7 ACTK_HUMAN Kappa-actin                           | 4  |                      | IWHHTFYNELR                                       | 84  | 11 | 10 | 81.91  | b4b9y2y3y5*y5y6y7y8y11                             | 1515.75 | 56.173  | 16028  | 2 | 758.38  | 0.72   |
| Q9BYX7 ACTK_HUMAN Kappa-actin                           | 5  |                      | HQGMMEGMHQK                                       | 39  | 11 | 6  | 69.95  | b3b4b9b10y8y9                                      | 1313.58 | 32.068  | 12206  | 2 | 657.29  | 15.80  |
| Q9BYX7 ACTK_HUMAN Kappa-actin                           | 6  |                      | DLYTNTVLSGGTTMYPGIAHR                             | 291 | 21 | 6  | 21.68  | b4b6°b6b14y12°y12                                  | 2267.09 | 94.445  | 2122   | 2 | 1134.05 | -11.20 |
| Q9BYX7 ACTK_HUMAN Kappa-actin                           | 7  |                      | GYRFTTTAEQEIVR                                    | 196 | 14 | 3  | 27.05  | b5b7b8                                             | 1670.83 | 66.687  | 15641  | 3 | 557.61  | -12.93 |
| Q9BYX7 ACTK_HUMAN Kappa-actin                           | 8  |                      | GMLTLKYPMEHGITNWDMEK                              | 62  | 22 | 8  | 36.36  | b11°b11b14b19y10°y10y11y13                         | 2622.25 | 100.022 | 7051   | 3 | 874.76  | 5.49   |
| Q9BYX7 ACTK_HUMAN Kappa-actin                           | 9  | Carbamidomethyl+C(4) | EKLCYVALDSEQEMAMAASSSV EK                         | 213 | 25 | 4  | 18.82  | b5y6y8y15                                          | 2763.24 | 87.263  | 2271   | 3 | 921.75  | -4.77  |
| Q9BYX7 ACTK_HUMAN Kappa-actin                           | 10 | Phosphoryl STY(13)   | KDLYTNTVLSGGTTMYPGIAHR                            | 290 | 22 | 3  | 23.3   | b5b11b12                                           | 2475.14 | 123.895 | 4923   | 3 | 825.72  | -8.38  |
| Q9BYX7 ACTK_HUMAN Kappa-actin                           | 11 | Oxidation+M(15)      | KDLYTNTVLSGGTTMYPGIAHR                            | 290 | 22 | 3  | 13.43  | b13y9y17                                           | 2411.21 | 43.688  | 161604 | 4 | 603.56  | 2.73   |
| P09493 TPM1_HUMAN Tropomyosin alpha-1 chain             | 1  |                      | IQLVEEELDR                                        | 91  | 10 | 17 | 114.92 | b2*b2b3b4y1y2y3y4°y4y5y6y7y8y9°y9*y9y10            | 1243.65 | 59.447  | 345185 | 2 | 622.33  | -1.47  |
| P09493 TPM1_HUMAN Tropomyosin alpha-1 chain             | 2  |                      | LATALQK                                           | 105 | 7  | 10 | 80.09  | b3°b3b4°b4y1y3y4y5y6y7                             | 744.45  | 29.010  | 24253  | 2 | 372.73  | -12.30 |
| P09493 TPM1_HUMAN Tropomyosin alpha-1 chain             | 3  |                      | AISEELDHALNDMTSI                                  | 268 | 16 | 9  | 59.92  | b4b7°b7b9b13y7°y7y13y14                            | 1758.81 | 69.565  | 11615  | 3 | 586.94  | -8.54  |
| P09493 TPM1_HUMAN Tropomyosin alpha-1 chain             | 4  |                      | AEERAELSEGK                                       | 178 | 11 | 6  | 52.47  | b7b10y3°y3y5y9                                     | 1218.58 | 69.026  | 42745  | 2 | 609.79  | -13.62 |
| P09493 TPM1_HUMAN Tropomyosin alpha-1 chain             | 5  |                      | ENALDRAEQAEADK                                    | 15  | 14 | 6  | 38.5   | b11b12*b12b13*b13y12                               | 1559.72 | 44.174  | 33838  | 2 | 780.36  | -8.53  |
| P09493 TPM1_HUMAN Tropomyosin alpha-1 chain             | 6  |                      | YKAISEELDHALNDMTSI                                | 266 | 18 | 6  | 32.55  | y4y8y11°y11y12°y12                                 | 2050.01 | 100.694 | 9736   | 3 | 684.01  | 12.62  |
| P09493 TPM1_HUMAN Tropomyosin alpha-1 chain             | 7  | Oxidation+M()        | AISEELDHALNDMTSI                                  | 268 | 16 | 6  | 35.41  | b10b13*b13y4y9y10                                  | 1774.83 | 65.059  | 2197   | 2 | 887.92  | 7.36   |
| P50552 VASP_HUMAN Vasodilator-stimulated phosphoprotein | 1  |                      | WLPAGTGPQAFSR                                     | 22  | 13 | 7  | 41.31  | b4b8°b8y3y7y8°y8                                   | 1387.72 | 62.333  | 61263  | 2 | 694.36  | 6.16   |
| P50552 VASP_HUMAN Vasodilator-stimulated phosphoprotein | 2  |                      | VQIYHNPTANSFR                                     | 35  | 13 | 6  | 43.08  | y7*y7y8y9y11y13                                    | 1546.76 | 45.796  | 44452  | 3 | 516.26  | -9.94  |
| P50552 VASP_HUMAN Vasodilator-stimulated phosphoprotein | 3  |                      | QQPGPSEHIER                                       | 143 | 11 | 5  | 68.49  | y3y4y6y7y9                                         | 1277.61 | 24.930  | 16694  | 3 | 426.54  | -9.36  |
| P50552 VASP_HUMAN Vasodilator-stimulated phosphoprotein | 4  |                      | SGGGGLMEEMNAMLAR                                  | 257 | 16 | 12 | 56.25  | b1b5b6b16°b16y7y8y9°y9y12*y12y16                   | 1623.74 | 88.633  | 14370  | 2 | 812.37  | 4.59   |
| P50552 VASP_HUMAN Vasodilator-stimulated phosphoprotein | 5  |                      | DESANQEEPEAR                                      | 286 | 12 | 7  | 54.43  | b2b3y2y3y4y5y6                                     | 1374.57 | 19.661  | 9930   | 2 | 687.79  | -2.13  |
| P50552 VASP_HUMAN Vasodilator-stimulated phosphoprotein | 6  |                      | EDAAQFAAGMASALELEGGPPP<br>PPPALPTWSVPNGPSPEEVEQQR | 96  | 47 | 7  | 16.7   | b2°b2y2y11*y11y14y26                               | 4781.30 | 112.196 | 5866   | 4 | 1196.08 | -2.45  |

|                                                             |    |                      |                              |     |    |    |       |                                      |         |         |        |   |         |        |
|-------------------------------------------------------------|----|----------------------|------------------------------|-----|----|----|-------|--------------------------------------|---------|---------|--------|---|---------|--------|
| P50552 VASP_HUMAN Vasodilator-stimulated phosphoprotein     | 7  |                      | VPAQSESVR                    | 298 | 9  | 3  | 38.25 | y5y6y8                               | 972.51  | 20.229  | 5729   | 2 | 486.76  | -3.89  |
| P50552 VASP_HUMAN Vasodilator-stimulated phosphoprotein     | 8  |                      | QEEASGGPTAPK                 | 240 | 12 | 5  | 44.89 | y2y3y6y7y8                           | 1171.56 | 19.170  | 4254   | 2 | 586.28  | -0.73  |
| P50552 VASP_HUMAN Vasodilator-stimulated phosphoprotein     | 9  | Carbamidomethyl+C(7) | MSETVICSSR                   | 0   | 10 | 4  | 33.88 | y6°y6y8y9                            | 1169.54 | 33.587  | 5946   | 2 | 585.28  | 13.46  |
| P50552 VASP_HUMAN Vasodilator-stimulated phosphoprotein     | 10 |                      | ATVMLYDDGNK                  | 10  | 11 | 4  | 24.29 | b7b10°b10y4                          | 1226.58 | 47.172  | 2887   | 2 | 613.80  | 8.96   |
| P50552 VASP_HUMAN Vasodilator-stimulated phosphoprotein     | 11 |                      | QQPGPSEHIERR                 | 143 | 12 | 4  | 44.89 | b3b7b8b9                             | 1433.71 | 50.946  | 145907 | 2 | 717.36  | -7.92  |
| P50552 VASP_HUMAN Vasodilator-stimulated phosphoprotein     | 12 |                      | VKEEIIIEAFVQELR              | 361 | 14 | 3  | 27.84 | y3y8y12                              | 1702.91 | 91.327  | 8319   | 3 | 568.31  | -14.77 |
| P50552 VASP_HUMAN Vasodilator-stimulated phosphoprotein     | 13 |                      | WLPAGTGPQAFSRVQIYHNPTANSFR   | 22  | 26 | 5  | 27.47 | b4b5b9b21°b21                        | 2915.47 | 91.631  | 6669   | 3 | 972.49  | -0.34  |
| P50552 VASP_HUMAN Vasodilator-stimulated phosphoprotein     | 14 |                      | AESGRSGGGLMEEMNAMLAR         | 252 | 21 | 5  | 18.91 | b9b16°b16y8y15                       | 2123.98 | 108.426 | 5893   | 2 | 1062.49 | 8.28   |
| P50552 VASP_HUMAN Vasodilator-stimulated phosphoprotein     | 15 | Oxidation+M()        | SGGGGLMEEMNAMLAR             | 257 | 16 | 7  | 37.85 | b3b5b6°b6b15y15*y15                  | 1639.74 | 136.626 | 4388   | 1 | 1639.74 | 7.89   |
| P50552 VASP_HUMAN Vasodilator-stimulated phosphoprotein     | 16 |                      | PGPSEHIER                    | 145 | 9  | 0  | 2.43  |                                      | 1021.50 | 24.932  | 3508   | 2 | 511.25  | -8.31  |
| P50552 VASP_HUMAN Vasodilator-stimulated phosphoprotein     | 17 |                      | PPPPALPTWSVPNGPSPEEVEQQKR    | 117 | 26 | 0  | 17.01 |                                      | 2834.49 | 112.213 | 3305   | 3 | 945.50  | 13.52  |
| P50552 VASP_HUMAN Vasodilator-stimulated phosphoprotein     | 18 |                      | PNGPSPEEVEQQKR               | 129 | 14 | 1  | 13.99 | b12                                  | 1594.77 | 112.131 | 2144   | 2 | 797.89  | -5.05  |
| P50552 VASP_HUMAN Vasodilator-stimulated phosphoprotein     | 19 |                      | VQIYHNPTANSFR                | 35  | 13 | 1  | 7.42  | y5                                   | 1529.76 | 45.872  | 2945   | 3 | 510.59  | 7.90   |
| P50552 VASP_HUMAN Vasodilator-stimulated phosphoprotein     | 20 |                      | QQPGPSEHIER                  | 143 | 11 | 0  | 2.43  |                                      | 1260.59 | 24.914  | 1789   | 3 | 420.87  | 1.84   |
| O00299 CLIC1_HUMAN Chloride intracellular channel protein 1 | 1  |                      | LAALNPESNTAGLDIFAK           | 95  | 18 | 10 | 60.99 | b2b3b5y2y3y4y12y13y14y18             | 1844.98 | 80.660  | 60328  | 2 | 922.99  | 3.37   |
| O00299 CLIC1_HUMAN Chloride intracellular channel protein 1 | 2  |                      | VLDNYLTSPLPEEVDETSAEDEGVSRQK | 138 | 28 | 4  | 11.7  | b6y4y21y28                           | 3120.50 | 70.382  | 35754  | 3 | 1040.84 | 4.62   |
| O00299 CLIC1_HUMAN Chloride intracellular channel protein 1 | 3  |                      | NSNPALNDNLEK                 | 119 | 12 | 15 | 96.78 | b2°b2b4b7y2°y2y4y5y6y8°y8y9*y9y10y12 | 1328.65 | 37.868  | 33300  | 2 | 664.83  | 0.83   |
| O00299 CLIC1_HUMAN Chloride intracellular channel protein 1 | 4  | Carbamidomethyl+C(2) | LCPGGQLPFLLYGTEVHTDTNK       | 57  | 22 | 4  | 19.94 | y6y11°y11y20                         | 2460.22 | 83.550  | 25075  | 3 | 820.74  | -1.09  |
| O00299 CLIC1_HUMAN Chloride intracellular channel protein 1 | 5  |                      | GVTFNVTVDTK                  | 37  | 12 | 7  | 48.11 | b4b5°b5y3y8y9°y9                     | 1281.66 | 65.967  | 22590  | 2 | 641.33  | -6.67  |
| O00299 CLIC1_HUMAN Chloride intracellular channel protein 1 | 6  | Carbamidomethyl+C(4) | IGNCPFSQR                    | 20  | 9  | 4  | 30.47 | b3y5y8°y8                            | 1078.49 | 47.218  | 44693  | 2 | 539.75  | -15.17 |
| O00299 CLIC1_HUMAN Chloride intracellular channel protein 1 | 7  |                      | MAEEQPQVELFVK                | 0   | 13 | 5  | 41.32 | b4b8°b8b9b12                         | 1547.77 | 33.586  | 10015  | 3 | 516.60  | -1.66  |
| O00299 CLIC1_HUMAN Chloride intracellular channel protein 1 | 8  |                      | FSAYIKNSNPALNDNLEK           | 113 | 18 | 3  | 15.57 | b8y6y15                              | 2038.03 | 61.258  | 178714 | 2 | 1019.52 | 2.93   |

|                                                              |    |                                             |                                      |     |    |    |        |                                            |         |         |        |   |         |        |
|--------------------------------------------------------------|----|---------------------------------------------|--------------------------------------|-----|----|----|--------|--------------------------------------------|---------|---------|--------|---|---------|--------|
| [O00299]CLIC1_HUMAN Chloride intracellular channel protein 1 | 9  |                                             | MAEEQPQVELFVKAGSDGAK                 | 0   | 20 | 5  | 14.36  | b9y4°y4y7°y7                               | 2134.04 | 58.877  | 70296  | 2 | 1067.52 | -4.80  |
| [O00299]CLIC1_HUMAN Chloride intracellular channel protein 1 | 10 |                                             | GVHRYLSNAYAR                         | 204 | 12 | 6  | 60.45  | b3b5b9b11y10°y10                           | 1406.72 | 68.258  | 47535  | 2 | 703.86  | -5.81  |
| [O00299]CLIC1_HUMAN Chloride intracellular channel protein 1 | 11 | Carbamidomethyl+C(2); Carbamidomethyl+C(32) | LCPGGQLPFLLYGTEVHTDTNKIE EFLEAVLCPPR | 57  | 35 | 5  | 23.34  | b7b9y5y6y12                                | 4013.97 | 120.649 | 2658   | 4 | 1004.25 | -10.77 |
| [O00299]CLIC1_HUMAN Chloride intracellular channel protein 1 | 12 | Carbamidomethyl+C(11)                       | AGSDGAKIGNCPFSQR                     | 13  | 16 | 6  | 35.41  | b4b13y3y10°y10y11                          | 1664.78 | 76.525  | 2467   | 3 | 555.60  | 0.73   |
| [O00299]CLIC1_HUMAN Chloride intracellular channel protein 1 | 13 | Phosphoryl STY(7)                           | GVTFNVTTVDTKR                        | 37  | 13 | 7  | 34.05  | b5b8°b8°b8b10y7°y7                         | 1517.74 | 44.132  | 4251   | 2 | 759.37  | 8.77   |
| [P02671]FIBA_HUMAN Fibrinogen alpha chain                    | 1  |                                             | MELERPGGNEITR                        | 258 | 13 | 16 | 99.6   | b2b4b8b9°b9°b9y3y8°y8°y8y9y10°y10y11y12y13 | 1501.73 | 42.201  | 260621 | 3 | 501.25  | -10.40 |
| [P02671]FIBA_HUMAN Fibrinogen alpha chain                    | 2  |                                             | GLIDEVNDQDFTNR                       | 71  | 13 | 14 | 122.15 | b3b5y2y3y4y5y7y8°y8y9y10y11y13°y13         | 1520.74 | 69.747  | 135855 | 2 | 760.87  | 2.25   |
| [P02671]FIBA_HUMAN Fibrinogen alpha chain                    | 3  |                                             | QLEQVIK                              | 202 | 8  | 14 | 67.28  | b3°b3°b3b5°b5°b5b8y1y2y3y4y6°y6y8          | 928.54  | 38.989  | 125288 | 2 | 464.77  | -4.86  |
| [P02671]FIBA_HUMAN Fibrinogen alpha chain                    | 4  |                                             | ALTDMPQMR                            | 249 | 9  | 5  | 38.25  | y4°y4y5y7y9                                | 1062.51 | 51.339  | 106587 | 2 | 531.76  | 0.80   |
| [P02671]FIBA_HUMAN Fibrinogen alpha chain                    | 5  |                                             | NSLFEYQK                             | 89  | 8  | 14 | 49.3   | b1°b1b2°b2b3y1y2°y2y4°y4°y4y5y6y8          | 1028.50 | 50.774  | 97327  | 2 | 514.75  | -5.22  |
| [P02671]FIBA_HUMAN Fibrinogen alpha chain                    | 6  |                                             | TFPGFFSPMLGEFVSETESR                 | 527 | 20 | 15 | 116.84 | b2b3b6b15y1y4y5y6y7y8y13y14y15y18y20       | 2265.07 | 109.511 | 57893  | 2 | 1133.04 | 6.36   |
| [P02671]FIBA_HUMAN Fibrinogen alpha chain                    | 7  |                                             | EVDLKDYEDQQK                         | 190 | 12 | 16 | 91.73  | b3b4b6°b6b9°b9y1y2°y2y5°y5y6°y6y7y8y12     | 1509.71 | 41.161  | 53387  | 2 | 755.36  | 5.26   |
| [P02671]FIBA_HUMAN Fibrinogen alpha chain                    | 8  |                                             | TVIGPDGHKEVTK                        | 467 | 13 | 9  | 58.51  | b2°b2y2y3y7y8y10y11y13                     | 1380.73 | 24.864  | 53159  | 3 | 460.92  | -12.02 |
| [P02671]FIBA_HUMAN Fibrinogen alpha chain                    | 9  |                                             | ESSSHHPGIAEFPSP                      | 558 | 15 | 11 | 66.21  | b6°b6b11°b11y2y3y4y5y8y9y15                | 1637.76 | 39.308  | 51115  | 3 | 546.59  | -6.56  |
| [P02671]FIBA_HUMAN Fibrinogen alpha chain                    | 10 |                                             | GDFSSANNRNDNTYNR                     | 114 | 15 | 8  | 29.42  | b4°b4y2y5°y5y6y12y13y15                    | 1730.73 | 26.912  | 40543  | 3 | 577.58  | -9.17  |
| [P02671]FIBA_HUMAN Fibrinogen alpha chain                    | 11 |                                             | DSHSLTTNIMEILR                       | 100 | 14 | 4  | 27.05  | y3y4y11y14                                 | 1629.83 | 87.941  | 40052  | 2 | 815.42  | 0.60   |
| [P02671]FIBA_HUMAN Fibrinogen alpha chain                    | 12 |                                             | GGSTSYGTGSETESPR                     | 271 | 16 | 10 | 81.96  | b5y1y3y5y6y8y10y11y12y16                   | 1572.68 | 26.238  | 28103  | 2 | 786.84  | 0.39   |
| [P02671]FIBA_HUMAN Fibrinogen alpha chain                    | 13 |                                             | QFTSSTSYNR                           | 581 | 10 | 5  | 51.87  | y4y6y7y8y10                                | 1190.54 | 29.897  | 6895   | 2 | 595.78  | -0.62  |
| [P02671]FIBA_HUMAN Fibrinogen alpha chain                    | 14 |                                             | MADEAGSEADHEGTHSTKR                  | 602 | 19 | 6  | 46.17  | b2y3y5y7y8y9                               | 2028.85 | 16.236  | 3728   | 3 | 676.96  | -7.82  |
| [P02671]FIBA_HUMAN Fibrinogen alpha chain                    | 15 | Carbamidomethyl+C(11)                       | EVVTSSEGDSDCPEAMDLGTLGIG TLDGFR      | 480 | 30 | 8  | 60.85  | b15b26y3y4y6y7y9y10                        | 3128.45 | 91.502  | 69003  | 3 | 1043.49 | 15.45  |
| [P02671]FIBA_HUMAN Fibrinogen alpha chain                    | 16 |                                             | VQHIQLLQK                            | 148 | 9  | 7  | 76.13  | b3°b3b8y3y4y5y6                            | 1106.64 | 44.178  | 51761  | 3 | 369.55  | -21.84 |
| [P02671]FIBA_HUMAN Fibrinogen alpha chain                    | 17 |                                             | MKPVPDLVPGNFK                        | 225 | 13 | 3  | 25.4   | b3b4y5                                     | 1441.77 | 64.195  | 29321  | 3 | 481.26  | -9.40  |
| [P02671]FIBA_HUMAN Fibrinogen alpha chain                    | 18 |                                             | MADEAGSEADHEGTHSTK                   | 602 | 18 | 3  | 22.73  | y3y6y14                                    | 1872.73 | 17.422  | 19334  | 4 | 468.94  | -17.60 |
| [P02671]FIBA_HUMAN Fibrinogen alpha chain                    | 19 |                                             | TWQDYK                               | 687 | 6  | 1  | 13.62  | b3                                         | 840.40  | 76.195  | 9121   | 1 | 840.40  | 12.49  |
| [P02671]FIBA_HUMAN Fibrinogen alpha chain                    | 20 |                                             | IEVLK                                | 137 | 5  | 1  | 13.21  | y4                                         | 601.39  | 36.028  | 3559   | 1 | 601.39  | -2.44  |
| [P02671]FIBA_HUMAN Fibrinogen alpha chain                    | 21 |                                             | VSEDLR                               | 129 | 6  | 1  | 13.62  | y3                                         | 718.38  | 23.994  | 2505   | 2 | 359.69  | 2.80   |
| [P02671]FIBA_HUMAN Fibrinogen alpha chain                    | 22 |                                             | VTSGSTTTTRR                          | 448 | 11 | 3  | 31.28  | b7b8b10                                    | 1166.60 | 55.287  | 115711 | 2 | 583.80  | -11.41 |

|                                                          |    |                                         |                                |     |    |    |        |                                                |         |         |       |   |         |        |
|----------------------------------------------------------|----|-----------------------------------------|--------------------------------|-----|----|----|--------|------------------------------------------------|---------|---------|-------|---|---------|--------|
| [P02671 FIBA_HUMAN Fibrinogen alpha chain                | 23 |                                         | HRHPDEAAFFDTASTGK              | 510 | 17 | 3  | 16.3   | b9b13y13                                       | 1886.87 | 84.259  | 34471 | 3 | 629.63  | -2.78  |
| [P02671 FIBA_HUMAN Fibrinogen alpha chain                | 24 |                                         | MKGLIDEVNDQFTNR                | 69  | 15 | 4  | 25.77  | b8b10y4y9                                      | 1779.85 | 66.768  | 29262 | 3 | 593.95  | -10.84 |
| [P02671 FIBA_HUMAN Fibrinogen alpha chain                | 25 |                                         | GSVLRVELEDWAGNEAYAEYHFR        | 720 | 23 | 5  | 22.07  | b17b18°b18y11°y11                              | 2711.32 | 136.838 | 13413 | 2 | 1356.16 | 12.61  |
| [P02671 FIBA_HUMAN Fibrinogen alpha chain                | 26 |                                         | EVDLKDYEDQQK                   | 190 | 12 | 5  | 22.26  | b6b11y4°y4*y4                                  | 1509.69 | 48.243  | 12985 | 2 | 755.35  | -7.92  |
| [P02671 FIBA_HUMAN Fibrinogen alpha chain                | 27 |                                         | DSHSLTTNIMEILRGDFSSANNR        | 100 | 23 | 7  | 35.55  | b8b9*b9b10°b10y5*y5                            | 2578.26 | 76.427  | 4593  | 4 | 645.32  | 9.94   |
| [P02671 FIBA_HUMAN Fibrinogen alpha chain                | 28 |                                         | NNSPYEIENGVVVWSFRGADYSLR       | 830 | 24 | 3  | 21.99  | b12y8y9                                        | 2772.34 | 118.684 | 4514  | 3 | 924.79  | 1.23   |
| [P02671 FIBA_HUMAN Fibrinogen alpha chain                | 29 |                                         | ALTDMPQMRMELERPGGNEITR         | 249 | 22 | 3  | 22.18  | b8y7y8                                         | 2545.24 | 69.557  | 3777  | 4 | 637.06  | 2.01   |
| [P02671 FIBA_HUMAN Fibrinogen alpha chain                | 30 |                                         | ESSSHHPGIAEFP SRGK             | 558 | 17 | 4  | 27.38  | b5b6b10y9                                      | 1822.87 | 30.537  | 3134  | 4 | 456.47  | -9.17  |
| [P02671 FIBA_HUMAN Fibrinogen alpha chain                | 31 |                                         | SSSYSKQFTSSTSYNR               | 575 | 16 | 7  | 28.32  | b9*b9b10b12°b12y7*y7                           | 1829.82 | 46.120  | 2591  | 2 | 915.41  | -7.54  |
| [P02671 FIBA_HUMAN Fibrinogen alpha chain                | 32 |                                         | QFTSSTSYNRGDSTFESK             | 581 | 18 | 8  | 40.78  | b8b10y6y7y9°y9y13*y13                          | 2041.93 | 65.063  | 2112  | 2 | 1021.47 | 12.02  |
| [P02671 FIBA_HUMAN Fibrinogen alpha chain                | 33 |                                         | MELERPGGNEITRGGSTSYGTGSETESPR  | 258 | 29 | 5  | 25.97  | b14y7y9y10y16                                  | 3055.44 | 73.759  | 1728  | 3 | 1019.15 | 13.74  |
| [P02671 FIBA_HUMAN Fibrinogen alpha chain                | 34 | Carbamidomethyl+C(3); Phosphoryl STY(7) | IVCLVLSVVGTAWTADSGEGDFLAEGGGVR | 5   | 30 | 6  | 23.57  | b8°b8y3y6y13_H3PO4y13y23                       | 3115.50 | 101.225 | 10922 | 4 | 779.63  | 8.54   |
| [P02671 FIBA_HUMAN Fibrinogen alpha chain                | 35 | Phosphoryl STY(10)                      | NNKDSHSLTTNIMEILR              | 97  | 17 | 4  | 16.3   | b3*b3b10y6                                     | 2065.97 | 49.886  | 9972  | 3 | 689.33  | 1.54   |
| [P02671 FIBA_HUMAN Fibrinogen alpha chain                | 36 | Oxidation+M(13)                         | NNKDSHSLTTNIMEILR              | 97  | 17 | 5  | 27.38  | b3*b3b4b14y7                                   | 2001.99 | 101.211 | 24655 | 2 | 1001.50 | -4.82  |
| [P02671 FIBA_HUMAN Fibrinogen alpha chain                | 37 | Oxidation+M(10)                         | DSHSLTTNIMEILR                 | 100 | 14 | 4  | 27.84  | b5°b5b8b12                                     | 1645.83 | 77.271  | 5509  | 2 | 823.42  | 5.49   |
| [P02671 FIBA_HUMAN Fibrinogen alpha chain                | 38 |                                         | IGPDGHKEVTK                    | 469 | 11 | 0  | 3.24   |                                                | 1180.63 | 24.868  | 24814 | 2 | 590.82  | -1.76  |
| [P02671 FIBA_HUMAN Fibrinogen alpha chain                | 39 |                                         | GPDGHKEVTK                     | 470 | 10 | 1  | 7.42   | b5                                             | 1067.54 | 24.871  | 13796 | 2 | 534.27  | -5.72  |
| [P02671 FIBA_HUMAN Fibrinogen alpha chain                | 40 |                                         | EFVSETESR                      | 538 | 9  | 1  | 7.53   | b5                                             | 1083.51 | 109.524 | 6024  | 1 | 1083.51 | 12.17  |
| [P02671 FIBA_HUMAN Fibrinogen alpha chain                | 41 |                                         | LERPGGNEITR                    | 260 | 11 | 1  | 7.42   | b8                                             | 1241.66 | 42.224  | 5471  | 2 | 621.33  | -2.36  |
| [P02671 FIBA_HUMAN Fibrinogen alpha chain                | 42 |                                         | GSEADHEGTHSTKR                 | 607 | 14 | 0  | 5.67   |                                                | 1511.68 | 16.251  | 2032  | 3 | 504.56  | -4.44  |
| [P02671 FIBA_HUMAN Fibrinogen alpha chain                | 43 |                                         | EVDLKDYEDQQK                   | 190 | 12 | 0  | 2.83   |                                                | 1491.69 | 41.182  | 12881 | 3 | 497.90  | -2.21  |
| [P02671 FIBA_HUMAN Fibrinogen alpha chain                | 44 |                                         | NSLFEYQK                       | 89  | 8  | 0  | 1.21   |                                                | 1011.48 | 50.730  | 2105  | 2 | 506.25  | 9.90   |
| [Q01518 CAP1_HUMAN Adenylyl cyclase-associated protein 1 | 1  |                                         | AGAAPYVQAFDSLLAGPVAEYLK        | 37  | 23 | 18 | 110.27 | b3b4b6b8*b8b10b11b13°b13*b13b15y2y3y5y7y8y9y23 | 2351.21 | 115.628 | 95721 | 3 | 784.41  | -5.71  |
| [Q01518 CAP1_HUMAN Adenylyl cyclase-associated protein 1 | 2  | Carbamidomethyl+C(5)                    | NSLDCEIVSAK                    | 422 | 11 | 9  | 65.48  | b1b2y1y3y4y5y8y9y11                            | 1235.60 | 47.024  | 70504 | 2 | 618.30  | 1.98   |
| [Q01518 CAP1_HUMAN Adenylyl cyclase-associated protein 1 | 3  |                                         | SSEMNVLIPTGGDFNEFPVPEQFK       | 433 | 25 | 5  | 12.4   | b7*b7y5y17y25                                  | 2811.34 | 91.897  | 39697 | 2 | 1406.17 | 8.16   |
| [Q01518 CAP1_HUMAN Adenylyl cyclase-associated protein 1 | 4  | Carbamidomethyl+C(9)                    | ALLVTASQCQPAENK                | 84  | 16 | 11 | 84.59  | b3b11b14y3y5y6*y6y8y11y12y16                   | 1757.88 | 43.970  | 38163 | 2 | 879.45  | -0.90  |
| [Q01518 CAP1_HUMAN Adenylyl cyclase-associated protein 1 | 5  |                                         | VENQENVSNLVIETELK              | 330 | 18 | 8  | 77.54  | y4y5y6y7y8y11y14y18                            | 2073.05 | 70.371  | 34539 | 2 | 1037.03 | 7.30   |
| [Q01518 CAP1_HUMAN Adenylyl cyclase-associated protein 1 | 6  |                                         | LFNHLSAVSESIQALGWVAMAPKPGPYVK  | 126 | 29 | 8  | 37.61  | b3b5b10b12y1y5y6y29                            | 3110.65 | 98.170  | 26475 | 3 | 1037.56 | 0.78   |

|                                                                |    |                       |                                  |     |    |    |       |                                                     |         |         |       |   |         |        |
|----------------------------------------------------------------|----|-----------------------|----------------------------------|-----|----|----|-------|-----------------------------------------------------|---------|---------|-------|---|---------|--------|
| Q01518 CAP1_HUMAN Adenylyl cyclase-associated protein 1        | 7  |                       | EMNDAAMFYTNR                     | 155 | 12 | 6  | 61.12 | y4y5y6y7y9y12                                       | 1462.61 | 57.732  | 21424 | 2 | 731.81  | 0.92   |
| Q01518 CAP1_HUMAN Adenylyl cyclase-associated protein 1        | 8  |                       | KEPAVLELEGK                      | 316 | 11 | 8  | 50.51 | b2°b2y2y3y5y6y9y11                                  | 1212.68 | 49.858  | 21083 | 2 | 606.84  | -1.61  |
| Q01518 CAP1_HUMAN Adenylyl cyclase-associated protein 1        | 9  |                       | LEAVSHTSDMHR                     | 17  | 12 | 7  | 34.22 | b2b5y1y3y4y7°y7                                     | 1382.63 | 25.559  | 19549 | 3 | 461.55  | -10.68 |
| Q01518 CAP1_HUMAN Adenylyl cyclase-associated protein 1        | 10 | Carbamidomethyl+C(9)  | INSITVDNCKK                      | 366 | 11 | 4  | 36.05 | y5°y5y7y9                                           | 1291.65 | 29.683  | 16698 | 3 | 431.22  | -13.42 |
| Q01518 CAP1_HUMAN Adenylyl cyclase-associated protein 1        | 11 |                       | SGPKPFSAPKPQTSPSPK               | 294 | 18 | 8  | 29.13 | b2b7b8°b8y2y4y8y18                                  | 1837.96 | 34.694  | 13321 | 3 | 613.33  | -11.03 |
| Q01518 CAP1_HUMAN Adenylyl cyclase-associated protein 1        | 12 | Carbamidomethyl+C(4)  | TDGCHAYLSK                       | 412 | 10 | 4  | 51.87 | y6y7y8y9                                            | 1151.54 | 32.122  | 1853  | 2 | 576.27  | 20.35  |
| Q01518 CAP1_HUMAN Adenylyl cyclase-associated protein 1        | 13 | Carbamidomethyl+C(9)  | INSITVDNCK                       | 366 | 10 | 3  | 28.65 | b9y5y6                                              | 1163.58 | 53.575  | 1671  | 2 | 582.29  | 6.92   |
| Q01518 CAP1_HUMAN Adenylyl cyclase-associated protein 1        | 14 |                       | EIGGDVQK                         | 63  | 8  | 4  | 40.85 | y4y6°y6y7                                           | 845.45  | 47.149  | 1598  | 2 | 423.23  | 16.97  |
| Q01518 CAP1_HUMAN Adenylyl cyclase-associated protein 1        | 15 | Carbamidomethyl+C(9)  | ALLVTASQCQPAENKLSDLLAPI<br>SEQIK | 84  | 29 | 7  | 35.7  | b3b4b14y7y8y24°y24                                  | 3165.69 | 89.705  | 89413 | 3 | 1055.90 | 3.16   |
| Q01518 CAP1_HUMAN Adenylyl cyclase-associated protein 1        | 16 |                       | KEPAVLELEGK                      | 316 | 11 | 3  | 27.3  | b5b6y8                                              | 1212.68 | 56.085  | 29812 | 2 | 606.84  | -4.73  |
| Q01518 CAP1_HUMAN Adenylyl cyclase-associated protein 1        | 17 | Carbamidomethyl+C(12) | VPTISINKTDGCHAYLSK               | 404 | 18 | 4  | 32.55 | y6y10y16y17                                         | 2004.00 | 49.216  | 18992 | 4 | 501.76  | -8.71  |
| Q01518 CAP1_HUMAN Adenylyl cyclase-associated protein 1        | 18 |                       | LEAVSHTSDMHRGYADSPSK             | 17  | 20 | 5  | 22.6  | b3b9°b9b12y17                                       | 2188.03 | 63.664  | 13774 | 3 | 730.01  | 8.37   |
| Q01518 CAP1_HUMAN Adenylyl cyclase-associated protein 1        | 19 |                       | LGLVFDDVVGIVEIINSKDVK            | 377 | 21 | 5  | 21.68 | b3b7°b7b14y6                                        | 2272.28 | 116.591 | 9597  | 3 | 758.10  | -0.21  |
| Q01518 CAP1_HUMAN Adenylyl cyclase-associated protein 1        | 20 |                       | AVGRLEAVSHTSDMHR                 | 13  | 16 | 4  | 28.32 | b15y6y7y10                                          | 1765.87 | 74.383  | 1542  | 2 | 883.44  | -2.07  |
| Q01518 CAP1_HUMAN Adenylyl cyclase-associated protein 1        | 21 | Phosphoryl STY(12)    | SSLFAQINQGESITHALK               | 254 | 18 | 3  | 24.49 | b8b10b11                                            | 2023.95 | 101.211 | 31458 | 3 | 675.32  | -11.64 |
| Q01518 CAP1_HUMAN Adenylyl cyclase-associated protein 1        | 22 | Phosphoryl STY(7)     | HAEMVHTGLK                       | 71  | 10 | 5  | 57.3  | b4b5_HPO3<br>b5y5y6y7_HPO3 y7                       | 1202.52 | 24.046  | 2878  | 2 | 601.77  | -4.47  |
| Q01518 CAP1_HUMAN Adenylyl cyclase-associated protein 1        | 23 |                       | QENVSNLVIETELK                   | 333 | 15 | 0  | 5.26  |                                                     | 1730.88 | 70.297  | 27437 | 2 | 865.94  | -1.62  |
| Q01518 CAP1_HUMAN Adenylyl cyclase-associated protein 1        | 24 | Carbamidomethyl+C(9)  | INSITVDNCKK                      | 366 | 11 | 0  | 2.43  |                                                     | 1273.64 | 29.686  | 1933  | 3 | 425.22  | -8.53  |
| Q01518 CAP1_HUMAN Adenylyl cyclase-associated protein 1        | 25 |                       | SGPKPFSAPKPQTSPSPK               | 294 | 18 | 0  | 5.26  |                                                     | 1820.95 | 34.623  | 1858  | 4 | 455.99  | -0.40  |
| P27105 STOM_HUMAN Erythrocyte band 7 integral membrane protein | 1  |                       | NSTIVFPLPIDMLQGIGAK              | 263 | 20 | 17 | 73.69 | b2b3°b3b4°b4°b4b5°b5<br>*b5b6*y2y3y4y6y14y15<br>y20 | 2127.20 | 125.074 | 36655 | 2 | 1064.11 | 7.69   |
| P27105 STOM_HUMAN Erythrocyte band 7 integral membrane protein | 2  |                       | EEIAHNMQSTLDDATDAWGIK            | 167 | 21 | 3  | 20.51 | y3y9y15                                             | 2345.07 | 78.046  | 14839 | 3 | 782.36  | 1.15   |
| P27105 STOM_HUMAN Erythrocyte band 7 integral membrane protein | 3  |                       | AMAAEAEASR                       | 205 | 10 | 4  | 36.89 | y6y7y8y10                                           | 1006.46 | 23.455  | 11040 | 2 | 503.73  | -1.33  |
| P27105 STOM_HUMAN Erythrocyte band 7 integral membrane protein | 4  | Carbamidomethyl+C(10) | GPGLFFLIPCTDSFIK                 | 77  | 16 | 3  | 17.15 | b6b12y8                                             | 1811.92 | 97.076  | 4389  | 3 | 604.64  | -12.87 |
| P27105 STOM_HUMAN Erythrocyte band 7 integral membrane protein | 5  |                       | EASMVITESPAALQLR                 | 235 | 16 | 3  | 23.68 | b9b10y11                                            | 1715.90 | 71.054  | 21960 | 2 | 858.46  | 1.92   |
| P27105 STOM_HUMAN Erythrocyte band 7 integral membrane protein | 6  |                       | VIAAEGEMNASR                     | 220 | 12 | 6  | 32.16 | b8b11*b11y5y10°y10                                  | 1247.60 | 40.042  | 2072  | 2 | 624.30  | -1.86  |

|                                                                |    |                       |                                  |     |    |    |        |                                      |         |         |         |   |        |        |
|----------------------------------------------------------------|----|-----------------------|----------------------------------|-----|----|----|--------|--------------------------------------|---------|---------|---------|---|--------|--------|
| P27105 STOM_HUMAN Erythrocyte band 7 integral membrane protein | 7  |                       | LPVQLQRAMAAEAEASR                | 198 | 17 | 5  | 44.57  | b15y6y7y11y12                        | 1840.97 | 90.577  | 34989   | 3 | 614.33 | -0.60  |
| P27105 STOM_HUMAN Erythrocyte band 7 integral membrane protein | 8  |                       | LPDSFKDSPSK                      | 14  | 11 | 3  | 24.29  | b7y4y10                              | 1220.61 | 69.733  | 9349    | 3 | 407.54 | -5.00  |
| P02775 CXCL7_HUMAN Platelet basic protein                      | 1  |                       | NIQSLEVIGK                       | 75  | 10 | 13 | 74.31  | b2b3*b3y1y2y3y4y6y7y8*y8*y8y10       | 1100.62 | 57.012  | 829730  | 2 | 550.81 | -8.21  |
| P02775 CXCL7_HUMAN Platelet basic protein                      | 2  | Carbamidomethyl+C(2)  | ICLDPDAPR                        | 103 | 9  | 16 | 89.34  | b2b3b5b9y1y2y3y5*y5y6*y6y7*y7y8*y8y9 | 1056.51 | 47.214  | 494457  | 2 | 528.76 | -6.93  |
| P02775 CXCL7_HUMAN Platelet basic protein                      | 3  |                       | EESLSDLYAELR                     | 49  | 13 | 9  | 81.93  | b12b13y3y4y5y8y9y10y13               | 1539.73 | 71.237  | 65502   | 2 | 770.37 | 11.18  |
| P02775 CXCL7_HUMAN Platelet basic protein                      | 4  | Carbamidomethyl+C(4)  | GTHCNQVEVIATLK                   | 85  | 14 | 15 | 157.63 | b3b4b5b6b7*b7b9b10b12y3y4*y4y5y7y11  | 1569.78 | 51.879  | 183884  | 3 | 523.93 | -16.95 |
| P02775 CXCL7_HUMAN Platelet basic protein                      | 5  |                       | GKEESLSDLYAELR                   | 47  | 15 | 4  | 29.42  | b3b10b14y7                           | 1724.83 | 92.627  | 1044600 | 2 | 862.92 | -0.35  |
| P02775 CXCL7_HUMAN Platelet basic protein                      | 6  | Carbamidomethyl+C(3)  | KICLDPDAPR                       | 102 | 10 | 9  | 86.73  | b5*b5b7b8y3y5*y5y8y9                 | 1184.61 | 41.994  | 100855  | 2 | 592.81 | -1.13  |
| P02775 CXCL7_HUMAN Platelet basic protein                      | 7  |                       | LDPDAPR                          | 105 | 7  | 4  | 54.47  | b3b4b5b6                             | 783.39  | 47.206  | 8128    | 1 | 783.39 | -7.17  |
| P14618 KPYM_HUMAN Pyruvate kinase isozymes M1/M2               | 1  |                       | ITLDNAYMEK                       | 141 | 10 | 6  | 40.11  | b6y2y3y8y9y10                        | 1197.58 | 53.094  | 62456   | 2 | 599.29 | 0.10   |
| P14618 KPYM_HUMAN Pyruvate kinase isozymes M1/M2               | 2  |                       | GDLGIEIPA EK                     | 294 | 11 | 11 | 64.89  | b2*b2b3*b3b4b5y2y3y4y6y11            | 1141.60 | 60.276  | 58261   | 2 | 571.31 | -5.13  |
| P14618 KPYM_HUMAN Pyruvate kinase isozymes M1/M2               | 3  | Carbamidomethyl+C(6)  | NTGICTIGPASR                     | 43  | 13 | 11 | 110.69 | b2b3b4y4y5y6y8y9y10y11y13            | 1359.70 | 53.974  | 56409   | 2 | 680.36 | -0.81  |
| P14618 KPYM_HUMAN Pyruvate kinase isozymes M1/M2               | 4  | Carbamidomethyl+C(16) | AEGSDVANAVLDGADCIMLSGET AK       | 342 | 25 | 5  | 23.08  | b14y5y12y13y25                       | 2494.17 | 90.150  | 37984   | 3 | 832.06 | 9.10   |
| P14618 KPYM_HUMAN Pyruvate kinase isozymes M1/M2               | 5  | Carbamidomethyl+C(1)  | CDENILWLDYK                      | 151 | 11 | 7  | 24.29  | b2b3b10y2y10y11*y11                  | 1468.68 | 79.554  | 27042   | 2 | 734.84 | 2.66   |
| P14618 KPYM_HUMAN Pyruvate kinase isozymes M1/M2               | 6  |                       | GVNLPGAAVDLPVSEK                 | 207 | 17 | 3  | 16.3   | b3y3y13                              | 1636.89 | 69.787  | 17734   | 2 | 818.95 | 1.86   |
| P14618 KPYM_HUMAN Pyruvate kinase isozymes M1/M2               | 7  |                       | GSGTAEVELKK                      | 125 | 11 | 11 | 70.92  | b2*b2b4y1y2y3y4y5y6y7y11             | 1118.59 | 26.876  | 17688   | 2 | 559.80 | -9.82  |
| P14618 KPYM_HUMAN Pyruvate kinase isozymes M1/M2               | 8  |                       | GADFLVTEVENGGSLGSK               | 188 | 18 | 7  | 29.13  | b11b13*b13y11*y11y12*y12             | 1779.86 | 71.018  | 14698   | 2 | 890.43 | -11.38 |
| P14618 KPYM_HUMAN Pyruvate kinase isozymes M1/M2               | 9  |                       | SVETLK                           | 56  | 6  | 5  | 43.05  | b3b5*b5y3*y3                         | 676.39  | 38.975  | 66539   | 1 | 676.39 | 2.26   |
| P14618 KPYM_HUMAN Pyruvate kinase isozymes M1/M2               | 10 |                       | TATESFASDPILYRPVAVALDTK          | 92  | 23 | 4  | 22.07  | b4*b4b5y14                           | 2465.32 | 82.755  | 44795   | 3 | 822.44 | 10.99  |
| P14618 KPYM_HUMAN Pyruvate kinase isozymes M1/M2               | 11 | Carbamidomethyl+C(7)  | AGKPVICATQMLESMIK                | 319 | 17 | 12 | 102.51 | b3b6b7b9b11b12y4y5y7y10*y10y12       | 1876.96 | 88.665  | 43196   | 3 | 626.32 | -7.48  |
| P14618 KPYM_HUMAN Pyruvate kinase isozymes M1/M2               | 12 |                       | EAEAAIYHLQLFEELR                 | 383 | 16 | 7  | 37.85  | b9b12b14*b14b15y10*y10               | 1931.94 | 89.839  | 32009   | 2 | 966.48 | -21.74 |
| P14618 KPYM_HUMAN Pyruvate kinase isozymes M1/M2               | 13 |                       | TGLIK                            | 120 | 5  | 1  | 13.21  | y3                                   | 531.35  | 49.154  | 10122   | 1 | 531.35 | 6.43   |
| P14618 KPYM_HUMAN Pyruvate kinase isozymes M1/M2               | 14 |                       | DPVQEAWAEDVDLR                   | 475 | 14 | 3  | 19.27  | b10y11y13                            | 1642.80 | 70.912  | 6648    | 3 | 548.27 | 17.54  |
| P14618 KPYM_HUMAN Pyruvate kinase isozymes M1/M2               | 15 |                       | QAHL YR                          | 461 | 6  | 1  | 13.62  | y4                                   | 787.42  | 34.989  | 4597    | 1 | 787.42 | 1.86   |
| P14618 KPYM_HUMAN Pyruvate kinase isozymes M1/M2               | 16 |                       | FGVEQVDVMVFASFIR                 | 230 | 16 | 8  | 60.22  | b4b7b11*b11y4y5y6y8                  | 1859.88 | 114.723 | 4391    | 3 | 620.63 | -10.04 |
| P14618 KPYM_HUMAN Pyruvate kinase isozymes M1/M2               | 17 | Carbamidomethyl+C(30) | SKPHSEAGTAFIQ TQQLHAAMADTFLEHMCR | 1   | 31 | 5  | 39.35  | y3y4y10*y10y11                       | 3513.72 | 125.206 | 2542    | 5 | 703.55 | 21.26  |
| P14618 KPYM_HUMAN Pyruvate kinase isozymes M1/M2               | 18 |                       | LNFSHGTHEYHAETIK                 | 73  | 16 | 3  | 23.68  | b8y9y10                              | 1883.93 | 40.334  | 2234    | 2 | 942.47 | 13.22  |

|                                                   |    |                                       |                                     |     |    |    |        |                                          |         |         |        |   |         |        |
|---------------------------------------------------|----|---------------------------------------|-------------------------------------|-----|----|----|--------|------------------------------------------|---------|---------|--------|---|---------|--------|
| [P14618]KPYM_HUMAN Pyruvate kinase isozymes M1/M2 | 19 | Carbamidomethyl+C(16)                 | AEGSDVANAVLDGADCIMLSGET AKGDYPLEAVR | 342 | 34 | 15 | 103.78 | b6b9b11b12y3y6y7y9y12y15y16y23y24y25y27  | 3494.66 | 94.843  | 76561  | 3 | 1165.56 | 4.19   |
| [P14618]KPYM_HUMAN Pyruvate kinase isozymes M1/M2 | 20 |                                       | KGDVVIVLTGWRPGSGFTNTMR              | 504 | 22 | 5  | 18.15  | b5°b5b7y5y10                             | 2391.25 | 79.040  | 58901  | 3 | 797.76  | -2.76  |
| [P14618]KPYM_HUMAN Pyruvate kinase isozymes M1/M2 | 21 |                                       | KGVNLPGAAVDLPVSEK                   | 206 | 18 | 5  | 36.97  | b5y3y6y8y12                              | 1764.97 | 63.933  | 47267  | 3 | 588.99  | -10.51 |
| [P14618]KPYM_HUMAN Pyruvate kinase isozymes M1/M2 | 22 | Carbamidomethyl+C(7)                  | GIFPVLCKDPVQEAWAEDVDLR              | 467 | 22 | 3  | 23.3   | y5y6y8                                   | 2557.28 | 90.468  | 47057  | 3 | 853.10  | 0.10   |
| [P14618]KPYM_HUMAN Pyruvate kinase isozymes M1/M2 | 23 |                                       | QKGADFLVTEVENGGSLGSK                | 186 | 20 | 3  | 21.15  | b4b11b15                                 | 2036.01 | 61.327  | 16005  | 2 | 1018.51 | -10.31 |
| [P14618]KPYM_HUMAN Pyruvate kinase isozymes M1/M2 | 24 |                                       | EMIKSGMNVAR                         | 62  | 11 | 3  | 24.29  | b4b7y10                                  | 1235.61 | 60.520  | 14434  | 3 | 412.54  | -14.72 |
| [P14618]KPYM_HUMAN Pyruvate kinase isozymes M1/M2 | 25 |                                       | RFDEILEASDGIMVAR                    | 278 | 16 | 4  | 38.85  | b5b7b10b12                               | 1821.91 | 76.303  | 8778   | 3 | 607.98  | -1.34  |
| [P14618]KPYM_HUMAN Pyruvate kinase isozymes M1/M2 | 26 |                                       | SGMNVARLNFSHGTHEYHAETIK             | 66  | 23 | 3  | 23.13  | b5b12b13                                 | 2599.28 | 109.550 | 3253   | 3 | 867.10  | 13.06  |
| [P14618]KPYM_HUMAN Pyruvate kinase isozymes M1/M2 | 27 | Phosphoryl STY(7)                     | EAEAIIYHLQLFEELR                    | 383 | 16 | 3  | 17.15  | b5y5y10                                  | 2011.96 | 66.085  | 13312  | 3 | 671.32  | 6.07   |
| [P14618]KPYM_HUMAN Pyruvate kinase isozymes M1/M2 | 28 | Phosphoryl STY(7)                     | GADFLVTEVENGGSLGSK                  | 188 | 18 | 4  | 15.57  | b6b9°b9y12_H3PO4 y12_HPO3 y12            | 1859.82 | 46.200  | 3421   | 2 | 930.41  | -8.40  |
| [P14618]KPYM_HUMAN Pyruvate kinase isozymes M1/M2 | 29 | Carbamidomethyl+C(16);Oxidation+M(18) | AEGSDVANAVLDGADCIMLSGET AK          | 342 | 25 | 3  | 12.4   | b10b12y4                                 | 2510.13 | 96.374  | 10279  | 2 | 1255.57 | -2.33  |
| [P14618]KPYM_HUMAN Pyruvate kinase isozymes M1/M2 | 30 | Oxidation+M(8)                        | ITLDNAYMEK                          | 141 | 10 | 5  | 26.89  | b5°b5*b5b7y6                             | 1213.57 | 62.951  | 6889   | 2 | 607.29  | -1.81  |
| [P07951]TPM2_HUMAN Tropomyosin beta chain         | 1  |                                       | IQLVEEELDR                          | 91  | 10 | 17 | 114.92 | b2*b2b3b4y1y2y3y4°y4 y5y6y7y8y9°y9*y9y10 | 1243.65 | 59.447  | 345185 | 2 | 622.33  | -1.47  |
| [P07951]TPM2_HUMAN Tropomyosin beta chain         | 2  |                                       | LATALQK                             | 105 | 7  | 10 | 80.09  | b3°b3b4°b4y1y3y4y5y6 y7                  | 744.45  | 29.010  | 24253  | 2 | 372.73  | -12.30 |
| [P07951]TPM2_HUMAN Tropomyosin beta chain         | 3  |                                       | QLEEEQALQK                          | 37  | 11 | 6  | 35.28  | b7b9°b9°b9y8y10                          | 1343.71 | 54.424  | 9296   | 2 | 672.36  | 19.71  |
| [P07951]TPM2_HUMAN Tropomyosin beta chain         | 4  |                                       | AISELDNALNDITSL                     | 268 | 16 | 6  | 28.32  | b8°b8b12b13y8*y8                         | 1717.85 | 60.306  | 2757   | 3 | 573.29  | 0.92   |
| [P07951]TPM2_HUMAN Tropomyosin beta chain         | 5  |                                       | AEFAERSVAK                          | 238 | 10 | 3  | 41.66  | b4b7b9                                   | 1107.59 | 53.404  | 7577   | 2 | 554.30  | 13.45  |
| [P07951]TPM2_HUMAN Tropomyosin beta chain         | 6  | Carbamidomethyl+C(1)                  | CKQLEEEQALQK                        | 35  | 13 | 4  | 29.87  | b4b10°b10b12                             | 1631.82 | 69.656  | 7317   | 2 | 816.41  | 6.06   |
| [P07951]TPM2_HUMAN Tropomyosin beta chain         | 7  |                                       | SEERAEVAESK                         | 178 | 11 | 4  | 41.48  | b4y4y6y10                                | 1234.59 | 76.422  | 5482   | 2 | 617.80  | 1.98   |
| [P07951]TPM2_HUMAN Tropomyosin beta chain         | 8  |                                       | SLEAQADKYSTK                        | 205 | 12 | 6  | 22.26  | b6°b6y6y8°y8*y8                          | 1340.66 | 37.037  | 3907   | 3 | 447.56  | -4.28  |
| [P08514]ITA2B_HUMAN Integrin alpha-IIB            | 1  |                                       | GPHALGAPSLLLTGTQLYGR                | 366 | 20 | 7  | 27.87  | b9b10b20°b20y4y7y20                      | 2022.10 | 78.081  | 75302  | 3 | 674.70  | -7.61  |
| [P08514]ITA2B_HUMAN Integrin alpha-IIB            | 2  | Carbamidomethyl+C(6)                  | AEGGQCPSLLFDLR                      | 90  | 14 | 10 | 39.8   | b5b10°b10y2y4y8y11*y11y14*y14            | 1562.77 | 79.584  | 72697  | 2 | 781.89  | 1.64   |
| [P08514]ITA2B_HUMAN Integrin alpha-IIB            | 3  |                                       | IVLLDVPVR                           | 765 | 9  | 8  | 61.66  | b2b3y3y4y5°y5y7y9                        | 1023.65 | 73.614  | 70872  | 2 | 512.33  | -6.50  |
| [P08514]ITA2B_HUMAN Integrin alpha-IIB            | 4  |                                       | ALSNVEGFER                          | 692 | 10 | 15 | 99.95  | b3b8y2°y2y3°y3y4°y4y5°y5y6y7y8°y8y10     | 1121.56 | 48.335  | 64169  | 2 | 561.28  | -0.22  |
| [P08514]ITA2B_HUMAN Integrin alpha-IIB            | 5  |                                       | VYLFLQPR                            | 358 | 8  | 5  | 40.85  | b2y4y5y6y8                               | 1035.60 | 72.628  | 55321  | 2 | 518.30  | -2.59  |
| [P08514]ITA2B_HUMAN Integrin alpha-IIB            | 6  |                                       | NVGSQTLQTFK                         | 108 | 11 | 7  | 24.29  | b2b3°b3b9y1y9y11                         | 1222.64 | 48.414  | 48944  | 2 | 611.82  | -0.90  |
| [P08514]ITA2B_HUMAN Integrin alpha-IIB            | 7  | Carbamidomethyl+C(15)                 | TLGPSQEETGGVFLCPWR                  | 72  | 18 | 7  | 52.76  | b1y3y4y5y6y12y18                         | 2033.99 | 80.866  | 48243  | 2 | 1017.50 | 7.02   |



|                                                         |    |                                                                               |                                      |     |    |    |       |                                                                                               |         |         |       |   |         |        |
|---------------------------------------------------------|----|-------------------------------------------------------------------------------|--------------------------------------|-----|----|----|-------|-----------------------------------------------------------------------------------------------|---------|---------|-------|---|---------|--------|
| P08514 ITA2B_HUMAN Integrin alpha-IIB                   | 8  |                                                                               | SRPSQVLDSPPFTGSAFGFSLR               | 431 | 22 | 7  | 42.41 | b5b8b9b11y3y8y10                                                                              | 2353.19 | 86.889  | 48102 | 3 | 785.07  | 0.21   |
| P08514 ITA2B_HUMAN Integrin alpha-IIB                   | 9  |                                                                               | FGSAIAPLGDLLDRDGYNDIAVAAP<br>YGGPSGR | 386 | 31 | 14 | 47.53 | b2b4b6 <sup>b</sup> b6b14b15y2y6y<br>8 <sup>y</sup> 8y10y25y26y31                             | 3092.52 | 80.225  | 41381 | 3 | 1031.51 | 5.68   |
| P08514 ITA2B_HUMAN Integrin alpha-IIB                   | 10 |                                                                               | VAIVVGAPR                            | 63  | 9  | 9  | 89.34 | b2b3b4y4y5y6y7y8y9                                                                            | 881.55  | 46.715  | 31335 | 2 | 441.28  | -4.99  |
| P08514 ITA2B_HUMAN Integrin alpha-IIB                   | 11 |                                                                               | DGYNDIAVAAPYGGPSGR                   | 399 | 18 | 4  | 22.97 | b9 <sup>b</sup> b9y7y8                                                                        | 1779.84 | 57.607  | 14431 | 2 | 890.42  | 3.91   |
| P08514 ITA2B_HUMAN Integrin alpha-IIB                   | 12 |                                                                               | IYVENDFSWDK                          | 184 | 11 | 4  | 24.29 | b8b10b11y10                                                                                   | 1415.65 | 93.279  | 8411  | 2 | 708.33  | -0.26  |
| P08514 ITA2B_HUMAN Integrin alpha-IIB                   | 13 | Carbamidomethyl+C(5);<br>Carbamidomethyl+C(11)                                | TPVSCFNQMCVGATGHNIPQK                | 510 | 22 | 5  | 34.33 | b6b9b11y12y13                                                                                 | 2459.15 | 68.459  | 18773 | 3 | 820.39  | -3.67  |
| P08514 ITA2B_HUMAN Integrin alpha-IIB                   | 14 | Carbamidomethyl+C(3)                                                          | LICNQK                               | 702 | 6  | 1  | 13.62 | b5                                                                                            | 775.41  | 27.738  | 10242 | 2 | 388.21  | 0.47   |
| P08514 ITA2B_HUMAN Integrin alpha-IIB                   | 15 |                                                                               | NSQNPNSK                             | 757 | 8  | 4  | 36.08 | b3 <sup>b</sup> b3y5y7                                                                        | 888.42  | 22.969  | 9525  | 2 | 444.71  | 5.15   |
| P08514 ITA2B_HUMAN Integrin alpha-IIB                   | 16 | Carbamidomethyl+C(9);<br>Carbamidomethyl+C(14);<br>Carbamidomethyl+C(19)<br>) | LQDPVLVSCDSAPCTVVQCCLQE<br>MAR       | 902 | 26 | 4  | 12.13 | b5 <sup>b</sup> b5b14y5                                                                       | 2991.40 | 89.810  | 5560  | 5 | 599.09  | 11.02  |
| P08514 ITA2B_HUMAN Integrin alpha-IIB                   | 17 |                                                                               | HDLLVGAPLYMESR                       | 334 | 14 | 4  | 27.05 | y3y4 <sup>y</sup> y4y7                                                                        | 1600.84 | 65.973  | 2900  | 2 | 800.92  | 14.64  |
| P08514 ITA2B_HUMAN Integrin alpha-IIB                   | 18 | Carbamidomethyl+C(17)                                                         | QQLGASVVSWSDVIVACAPWQH<br>WNVLEK     | 121 | 28 | 3  | 11.7  | b5b10y8                                                                                       | 3136.51 | 91.393  | 2245  | 3 | 1046.17 | -19.38 |
| P08514 ITA2B_HUMAN Integrin alpha-IIB                   | 19 | Carbamidomethyl+C(9)                                                          | ENETRVLVCELGNPMK                     | 709 | 16 | 4  | 17.15 | b9b13 <sup>b</sup> b13y9                                                                      | 1888.93 | 81.531  | 12712 | 3 | 630.31  | 1.23   |
| P08514 ITA2B_HUMAN Integrin alpha-IIB                   | 20 |                                                                               | FGSAIAPLGDLLDRDGYNDIAVAAP<br>YGGPSGR | 386 | 31 | 3  | 11.25 | b16y6y11                                                                                      | 3092.49 | 91.348  | 5597  | 5 | 619.30  | -5.84  |
| P08514 ITA2B_HUMAN Integrin alpha-IIB                   | 21 | Carbamidomethyl+C(12)                                                         | TEEAETPVGSCFLAQPESEGR                | 149 | 21 | 5  | 23.52 | y5y6 <sup>y</sup> y6y11 <sup>y</sup> y11                                                      | 2293.06 | 73.496  | 4675  | 2 | 1147.03 | -8.52  |
| P08514 ITA2B_HUMAN Integrin alpha-IIB                   | 22 |                                                                               | LRAEQMASYFGHSAVAVTDVNGD<br>GR        | 310 | 24 | 7  | 34.3  | b6b7 <sup>b</sup> b7b18y5y9y13                                                                | 2580.24 | 136.375 | 3324  | 2 | 1290.62 | 3.50   |
| P08514 ITA2B_HUMAN Integrin alpha-IIB                   | 23 |                                                                               | AEAQVELRGNLSPASLVVAEEEGE<br>R        | 774 | 25 | 4  | 23.08 | b9y4y6y7                                                                                      | 2629.34 | 131.630 | 2003  | 3 | 877.12  | 5.39   |
| P08514 ITA2B_HUMAN Integrin alpha-IIB                   | 24 | Oxidation+M(8)                                                                | NAQIGIAMLVSVGNLEEAGESVSF<br>QLQIR    | 726 | 29 | 5  | 16.89 | b4b9 <sup>b</sup> b9b14y11                                                                    | 3089.59 | 113.256 | 31026 | 4 | 773.15  | 0.32   |
| P08514 ITA2B_HUMAN Integrin alpha-IIB                   | 25 | Carbamidomethyl+C(5);<br>Oxidation+M(9)                                       | HSPICHTTMAFLR                        | 571 | 13 | 4  | 34.42 | b5b11y5y6                                                                                     | 1586.77 | 48.319  | 8966  | 2 | 793.89  | 8.54   |
| P08514 ITA2B_HUMAN Integrin alpha-IIB                   | 26 | Carbamidomethyl+C(5);<br>Oxidation+M(9)                                       | HSPICHTTMAFLRDEADFRDK                | 571 | 21 | 5  | 29.73 | b3b9y5y8y9                                                                                    | 2563.17 | 44.199  | 3207  | 2 | 1282.09 | -5.62  |
| P08514 ITA2B_HUMAN Integrin alpha-IIB                   | 27 |                                                                               | NVGSQTLQ                             | 108 | 8  | 0  | 2.43  |                                                                                               | 846.44  | 48.379  | 7140  | 1 | 846.44  | 8.44   |
| P08514 ITA2B_HUMAN Integrin alpha-IIB                   | 28 | Carbamidomethyl+C(2)                                                          | QCPSLLFDLR                           | 94  | 10 | 3  | 15.6  | b5b9 <sup>b</sup> b9                                                                          | 1248.63 | 79.602  | 5374  | 2 | 624.82  | -6.75  |
| P08514 ITA2B_HUMAN Integrin alpha-IIB                   | 29 |                                                                               | IVVGAPR                              | 65  | 7  | 0  | 1.62  |                                                                                               | 711.46  | 46.719  | 2298  | 1 | 711.46  | 5.40   |
| P11142 HSP7C_HUMAN Heat shock<br>cognate 71 kDa protein | 1  |                                                                               | DAGTIAGLNVLR                         | 159 | 12 | 8  | 44.13 | b2b4 <sup>b</sup> b4b7y3y7y8y12                                                               | 1199.67 | 69.697  | 78476 | 2 | 600.34  | -4.48  |
| P11142 HSP7C_HUMAN Heat shock<br>cognate 71 kDa protein | 2  |                                                                               | IINEPTAAAIAYGLDKK                    | 171 | 17 | 7  | 33.7  | b2y2y5y7y13y14y17                                                                             | 1787.97 | 65.144  | 62949 | 3 | 596.66  | -10.45 |
| P11142 HSP7C_HUMAN Heat shock<br>cognate 71 kDa protein | 3  |                                                                               | VEIANDQGNR                           | 25  | 11 | 14 | 98.13 | b2b3b10y3y4 <sup>y</sup> y4y6 <sup>y</sup> y6y<br>7y8y10 <sup>y</sup> y10 <sup>y</sup> y10y11 | 1228.62 | 36.699  | 60296 | 2 | 614.82  | -2.68  |
| P11142 HSP7C_HUMAN Heat shock<br>cognate 71 kDa protein | 4  | Carbamidomethyl+C(2)                                                          | VCNPIITK                             | 601 | 8  | 4  | 40.85 | b2y5y6y7                                                                                      | 944.52  | 39.773  | 55408 | 2 | 472.76  | -4.14  |
| P11142 HSP7C_HUMAN Heat shock<br>cognate 71 kDa protein | 5  |                                                                               | TTPSYVAFTDTER                        | 36  | 13 | 10 | 67.47 | b1b5 <sup>b</sup> b5y3y4 <sup>y</sup> y4y6y9y1<br>1y13                                        | 1487.70 | 55.395  | 55293 | 2 | 744.36  | 1.15   |

|                                                      |    |                                              |                                           |     |    |    |       |                                                       |         |         |        |   |         |        |
|------------------------------------------------------|----|----------------------------------------------|-------------------------------------------|-----|----|----|-------|-------------------------------------------------------|---------|---------|--------|---|---------|--------|
| P11142 HSP7C_HUMAN Heat shock cognate 71 kDa protein | 6  |                                              | LLQDFNKG                                  | 348 | 9  | 7  | 44.93 | b2b5b6*b8y3y4*y4                                      | 1081.56 | 71.308  | 41350  | 2 | 541.28  | -7.79  |
| P11142 HSP7C_HUMAN Heat shock cognate 71 kDa protein | 7  |                                              | TVTNAVVTVPAYFNDSQR                        | 137 | 18 | 7  | 52.76 | y3y9*y9y10y11y12y18                                   | 1982.00 | 69.194  | 30115  | 2 | 991.51  | 2.89   |
| P11142 HSP7C_HUMAN Heat shock cognate 71 kDa protein | 8  |                                              | NSLESYAFNMK                               | 539 | 11 | 14 | 60.12 | b1b2*b2*b2b3*b3b4*b4b8y2y3y7y8y11                     | 1303.61 | 64.884  | 26840  | 2 | 652.31  | 5.06   |
| P11142 HSP7C_HUMAN Heat shock cognate 71 kDa protein | 9  |                                              | STAGDTHLGGEDFDNR                          | 220 | 16 | 6  | 34.55 | b2*b2y8y9y10y16                                       | 1691.71 | 38.908  | 23637  | 3 | 564.58  | -6.93  |
| P11142 HSP7C_HUMAN Heat shock cognate 71 kDa protein | 10 |                                              | NQVAMNPTNTVFDK                            | 56  | 15 | 4  | 18.12 | b3*b3y11y13                                           | 1649.80 | 57.687  | 19039  | 2 | 825.40  | 2.22   |
| P11142 HSP7C_HUMAN Heat shock cognate 71 kDa protein | 11 |                                              | NQVAMNPTNTVFDK                            | 56  | 16 | 6  | 24.85 | b3b10b13*b13b16y16                                    | 1805.87 | 69.524  | 6564   | 2 | 903.44  | -13.25 |
| P11142 HSP7C_HUMAN Heat shock cognate 71 kDa protein | 12 |                                              | LYQSAGGMPGGMPGGFPGGGAPP<br>SGGASSGPTIEEVD | 609 | 37 | 3  | 10.87 | b3b29y16                                              | 3346.44 | 87.694  | 33258  | 4 | 837.37  | -16.34 |
| P11142 HSP7C_HUMAN Heat shock cognate 71 kDa protein | 13 |                                              | GTLDPVEK                                  | 311 | 8  | 7  | 54.07 | b3*b3b7*b7y4*y4y6                                     | 858.45  | 33.570  | 13557  | 2 | 429.73  | -13.30 |
| P11142 HSP7C_HUMAN Heat shock cognate 71 kDa protein | 14 |                                              | SQIHDIVLGGSTR                             | 328 | 14 | 4  | 19.27 | b3*b3y5y7                                             | 1481.78 | 46.101  | 7641   | 3 | 494.60  | -17.71 |
| P11142 HSP7C_HUMAN Heat shock cognate 71 kDa protein | 15 |                                              | GVPQIEVTFDIDANGILNVSVDK                   | 469 | 24 | 4  | 12.7  | b3b8*b8y5                                             | 2514.27 | 113.087 | 4006   | 3 | 838.76  | -14.95 |
| P11142 HSP7C_HUMAN Heat shock cognate 71 kDa protein | 16 |                                              | QTQTFTTYSNQPGLVQVYEGER                    | 423 | 24 | 3  | 12.7  | b5b11y15                                              | 2774.35 | 80.163  | 3330   | 4 | 694.34  | 7.74   |
| P11142 HSP7C_HUMAN Heat shock cognate 71 kDa protein | 17 |                                              | LQKINDEDK                                 | 557 | 10 | 4  | 43.12 | b4y6y7y8                                              | 1159.60 | 50.866  | 18772  | 2 | 580.31  | 7.26   |
| P11142 HSP7C_HUMAN Heat shock cognate 71 kDa protein | 18 |                                              | NQVAMNPTNTVFDK                            | 56  | 16 | 3  | 17.15 | b11b15y11                                             | 1805.89 | 71.970  | 12683  | 3 | 602.63  | -4.87  |
| P11142 HSP7C_HUMAN Heat shock cognate 71 kDa protein | 19 | Carbamidomethyl+C(14)                        | GPAVGIDLGTYSYCVGFQHGKV<br>EIIANDQGNR      | 3   | 33 | 5  | 13.28 | b5b12y7y7y10                                          | 3472.72 | 80.235  | 11515  | 4 | 868.94  | -1.69  |
| P11142 HSP7C_HUMAN Heat shock cognate 71 kDa protein | 20 |                                              | NQTAEKEEFHQK                              | 583 | 14 | 9  | 39    | b4*b4b5*b5b13y8*y8y10*y10                             | 1745.83 | 90.574  | 6172   | 2 | 873.42  | 9.16   |
| P11142 HSP7C_HUMAN Heat shock cognate 71 kDa protein | 21 |                                              | GETKSFYPEEVSSMVLTK                        | 108 | 18 | 4  | 29.13 | b6b14y13y14                                           | 2031.99 | 84.418  | 3225   | 3 | 678.00  | -0.90  |
| P11142 HSP7C_HUMAN Heat shock cognate 71 kDa protein | 22 |                                              | EIAEAYLGKTVTNAVVTVPAYFN<br>DSQR           | 128 | 27 | 6  | 38.74 | b6*b6b7b8y8y10                                        | 2956.54 | 136.283 | 3001   | 3 | 986.18  | 10.65  |
| P11142 HSP7C_HUMAN Heat shock cognate 71 kDa protein | 23 |                                              | NSLESYAFNMKATVEDEK                        | 539 | 18 | 5  | 30.96 | b8b12y3y7y11                                          | 2075.97 | 99.910  | 2124   | 2 | 1038.49 | 7.06   |
| P11142 HSP7C_HUMAN Heat shock cognate 71 kDa protein | 24 | Phosphoryl STY(8)                            | TVTNAVVTVPAYFNDSQR                        | 137 | 18 | 7  | 62.14 | b8y5y8y10y12y14_H3P<br>O4 y13y14                      | 2061.93 | 77.291  | 48898  | 3 | 687.98  | -13.14 |
| P11142 HSP7C_HUMAN Heat shock cognate 71 kDa protein | 25 | Phosphoryl STY(16)                           | TLSSSTQASIEIDSLYEGIDFYTSITR               | 272 | 27 | 4  | 15.32 | b15b19y9y13                                           | 3077.41 | 108.283 | 12953  | 4 | 770.11  | 0.16   |
| P11142 HSP7C_HUMAN Heat shock cognate 71 kDa protein | 26 | Carbamidomethyl+C(14);<br>Phosphoryl STY(11) | GPAVGIDLGTYSYCVGFQHGK                     | 3   | 22 | 6  | 28.93 | b4b11*b11b12_HPO3<br>b12y7y10                         | 2343.06 | 35.564  | 4043   | 4 | 586.52  | -6.98  |
| P11142 HSP7C_HUMAN Heat shock cognate 71 kDa protein | 27 | Phosphoryl STY()                             | NVLIFDLGGGTFDVSILTIEDGIFEV<br>K           | 193 | 27 | 3  | 11.9  | b4b16y8                                               | 2991.53 | 117.713 | 1848   | 3 | 997.85  | 11.83  |
| P06396 GELS_HUMAN Gelsolin                           | 1  |                                              | VPFDAATLHTSTAMAAQHGMDD<br>DGTGQK          | 419 | 28 | 18 | 84.61 | b4b8b10*b10b13y1y5*y5*y5y6*y6y8y10y11y13<br>y14y19y28 | 2873.26 | 57.076  | 213226 | 4 | 719.07  | -7.65  |
| P06396 GELS_HUMAN Gelsolin                           | 2  |                                              | AGALNSNDAFVLK                             | 584 | 13 | 10 | 52.97 | b3b11*b11b12b13*b13y5y9y10y13                         | 1319.69 | 60.942  | 195001 | 2 | 660.35  | -1.57  |
| P06396 GELS_HUMAN Gelsolin                           | 3  |                                              | NWRDPDQTDGLGLSYLSSHIANV<br>ER             | 394 | 25 | 12 | 52.54 | b2b3*b3b4b6y5y8y10y12y14*y14y25                       | 2843.34 | 78.473  | 139122 | 4 | 711.59  | -10.48 |
| P06396 GELS_HUMAN Gelsolin                           | 4  |                                              | QTQSVLPEGGETPLFK                          | 373 | 17 | 10 | 51.09 | b3y2y4y10*y10y11y13y14y17*y17                         | 1829.97 | 73.319  | 122426 | 2 | 915.49  | 5.14   |
| P06396 GELS_HUMAN Gelsolin                           | 5  |                                              | AQPVQVAEGSEPDGFWEALGGK                    | 626 | 22 | 10 | 56.5  | b2*b2y3y5y8y9*y11y14y16y22                            | 2272.10 | 82.919  | 106124 | 2 | 1136.56 | 6.98   |
| P06396 GELS_HUMAN Gelsolin                           | 6  |                                              | TGAQELLR                                  | 615 | 8  | 5  | 57.08 | y3y4y6y7y8                                            | 887.49  | 41.568  | 94123  | 2 | 444.25  | -7.77  |
| P06396 GELS_HUMAN Gelsolin                           | 7  |                                              | TPSAAYLWVGTGASEAEK                        | 597 | 18 | 6  | 34.63 | b5b7b8b14*b14y13                                      | 1837.88 | 68.415  | 77421  | 2 | 919.44  | -9.23  |

|                                                     |    |                                             |                                         |     |    |    |        |                                                   |         |         |        |   |         |        |
|-----------------------------------------------------|----|---------------------------------------------|-----------------------------------------|-----|----|----|--------|---------------------------------------------------|---------|---------|--------|---|---------|--------|
| P06396 GELS_HUMAN Gelsolin                          | 8  | Carbamidomethyl+C(16);Carbamidomethyl+C(29) | ATEVPVSWESFNNGDCFILDLGNNIHQWCGSNSNR     | 199 | 35 | 17 | 43.45  | b2*b2b3*b3b4b11b13*b13y2*y2y6*y6y14y16y18y31y35   | 4037.83 | 99.982  | 72201  | 3 | 1346.61 | 7.92   |
| P06396 GELS_HUMAN Gelsolin                          | 9  | Carbamidomethyl+C(4)                        | SEDCFILDHGKDGK                          | 327 | 14 | 6  | 19.27  | b2b3*b3b10y2y3                                    | 1620.72 | 43.202  | 44016  | 3 | 540.91  | -9.79  |
| P06396 GELS_HUMAN Gelsolin                          | 10 |                                             | AVEVLPK                                 | 577 | 7  | 5  | 56.67  | b3b4y3y5y7                                        | 755.46  | 40.213  | 39030  | 2 | 378.23  | -9.37  |
| P06396 GELS_HUMAN Gelsolin                          | 11 |                                             | YIETDPANR                               | 729 | 9  | 9  | 38.25  | b1b2y4*y4y5*y5y7*y7y9                             | 1078.51 | 30.100  | 32194  | 2 | 539.76  | -1.36  |
| P06396 GELS_HUMAN Gelsolin                          | 12 | Carbamidomethyl+C(4)                        | SEDCFILDHGK                             | 327 | 11 | 5  | 36.05  | b11y3y4y5y11                                      | 1320.57 | 48.732  | 30002  | 3 | 440.86  | -10.82 |
| P06396 GELS_HUMAN Gelsolin                          | 13 |                                             | VSNGAGTMSVSLVADENPFAQGAL                | 302 | 25 | 15 | 60.39  | b4b6*b6b8b11b12b19y2y6y11*y11y12*y12y25*y25       | 2463.24 | 82.994  | 26709  | 2 | 1232.12 | 8.33   |
| P06396 GELS_HUMAN Gelsolin                          | 14 |                                             | HVVPEVVVQR                              | 177 | 11 | 6  | 36.71  | b3y4y8y9*y9y11                                    | 1275.71 | 38.471  | 19545  | 2 | 638.36  | -3.06  |
| P06396 GELS_HUMAN Gelsolin                          | 15 |                                             | VHVSEEGTEPEAMLQVLGPKPALPAGTEDTAK        | 257 | 32 | 6  | 21.69  | b6b7b14*b14y8*y8                                  | 3301.63 | 70.878  | 9202   | 3 | 1101.22 | -9.32  |
| P06396 GELS_HUMAN Gelsolin                          | 16 | Carbamidomethyl+C(16)                       | NGNLQYDLHYWLGNECSQDESGAAAIFTVQLDDYLN    | 104 | 38 | 3  | 10.86  | b8b12y15                                          | 4346.95 | 77.139  | 7415   | 5 | 870.20  | -3.93  |
| P06396 GELS_HUMAN Gelsolin                          | 17 |                                             | QGQIYNWQGAQSTQDEVAASAILTAQLDEELGGTPVQSR | 485 | 40 | 7  | 21.35  | b2b6b7*b7b13*b13y8                                | 4273.11 | 98.326  | 4937   | 3 | 1425.04 | 2.97   |
| P06396 GELS_HUMAN Gelsolin                          | 18 |                                             | QGFPEPSFVGWFLGWDDDYWSVDPLDR             | 748 | 27 | 6  | 39.22  | b3y1y4y5y7y8                                      | 3230.48 | 131.949 | 3575   | 3 | 1077.50 | 8.69   |
| P06396 GELS_HUMAN Gelsolin                          | 19 |                                             | VPVDPATYQGQFYGGDSYIILYNYR               | 457 | 24 | 6  | 19.01  | b1b9*b9b11*b11b15                                 | 2771.37 | 87.987  | 2066   | 4 | 693.60  | 13.39  |
| P06396 GELS_HUMAN Gelsolin                          | 20 |                                             | EVQGFESATFLGYFK                         | 147 | 15 | 6  | 29.42  | b4*b4y3y4y12*y12                                  | 1722.84 | 90.584  | 55162  | 2 | 861.93  | 4.18   |
| P06396 GELS_HUMAN Gelsolin                          | 21 |                                             | DPDQTDGLGLSYLSSHIANVER                  | 397 | 22 | 5  | 28.93  | b3b4b10y6y9                                       | 2387.15 | 79.616  | 37706  | 3 | 796.39  | 0.82   |
| P06396 GELS_HUMAN Gelsolin                          | 22 |                                             | GASQAGAPQGR                             | 32  | 11 | 5  | 52.47  | b5b6b7y4y7                                        | 999.49  | 74.853  | 8637   | 1 | 999.49  | -8.73  |
| P06396 GELS_HUMAN Gelsolin                          | 23 | Carbamidomethyl+C(4)                        | LFACSNKIGR                              | 668 | 10 | 3  | 26.89  | b4b8y8                                            | 1165.61 | 69.775  | 156720 | 2 | 583.31  | -1.36  |
| P06396 GELS_HUMAN Gelsolin                          | 24 |                                             | IEGSNKVPVDPATYQGQFYGGDSYIILYNYR         | 451 | 30 | 18 | 124.14 | b6b7*b7b10*b10b16b25y3y4y5*y5y6y11y12y13y14y20y23 | 3399.68 | 85.207  | 91056  | 3 | 1133.90 | 6.97   |
| P06396 GELS_HUMAN Gelsolin                          | 25 | Carbamidomethyl+C(11)                       | MDAHPRLFACSNK                           | 661 | 14 | 4  | 19.27  | b7*b7b11y8                                        | 1643.77 | 62.893  | 11851  | 2 | 822.39  | -6.98  |
| P06396 GELS_HUMAN Gelsolin                          | 26 |                                             | TASDFITKMDYPK                           | 360 | 13 | 4  | 25.4   | b7y11*y11y12                                      | 1516.75 | 60.954  | 8545   | 2 | 758.88  | 9.90   |
| P06396 GELS_HUMAN Gelsolin                          | 27 |                                             | GGTSREGGQTAPASTR                        | 548 | 16 | 5  | 37.31  | b11b12*b12y13y14                                  | 1532.72 | 103.858 | 5041   | 3 | 511.58  | -10.67 |
| P06396 GELS_HUMAN Gelsolin                          | 28 | Carbamidomethyl+C(4)                        | SEDCFILDHGKDGK                          | 327 | 14 | 3  | 27.84  | y8y10y12                                          | 1620.75 | 112.190 | 2967   | 2 | 810.88  | 12.43  |
| P06396 GELS_HUMAN Gelsolin                          | 29 |                                             | AATASRGASQAGAPQGR                       | 26  | 17 | 3  | 16.3   | b10b13y7                                          | 1556.79 | 64.563  | 2641   | 2 | 778.90  | -2.12  |
| P06396 GELS_HUMAN Gelsolin                          | 30 | Oxidation+M(13)                             | VHVSEEGTEPEAMLQVLGPKPALPAGTEDTAK        | 257 | 32 | 4  | 11.14  | b3b9*b9y25                                        | 3317.61 | 71.016  | 11211  | 3 | 1106.54 | -13.10 |
| P06396 GELS_HUMAN Gelsolin                          | 31 | Oxidation+M(9)                              | VPEARPNMNVVEHPEFLK                      | 43  | 18 | 5  | 26.56  | b4b8b9y7*y7                                       | 2095.07 | 103.701 | 8159   | 2 | 1048.04 | 5.13   |
| P06396 GELS_HUMAN Gelsolin                          | 32 | Carbamidomethyl+C(2)                        | DCFILDHGK                               | 329 | 9  | 0  | 2.43   |                                                   | 1104.52 | 48.693  | 2139   | 2 | 552.76  | 2.54   |
| Q9Y281 COF2_HUMAN Cofilin-2                         | 1  |                                             | KEDLVFIFWAPESAPLK                       | 95  | 17 | 10 | 83.08  | b5b6b7y3y6y7*y7y8y9y17                            | 1990.06 | 97.812  | 244321 | 3 | 664.02  | -6.56  |
| Q9Y281 COF2_HUMAN Cofilin-2                         | 2  |                                             | YALYDATYETK                             | 81  | 11 | 12 | 110.55 | b2b3b4b6y2y5y6y7y8y9y10y11                        | 1337.62 | 52.883  | 117205 | 2 | 669.32  | -1.19  |
| Q9Y281 COF2_HUMAN Cofilin-2                         | 3  |                                             | MIYASSKDAIK                             | 114 | 11 | 5  | 24.29  | b5*b5b8y2y3                                       | 1226.64 | 32.069  | 2869   | 3 | 409.55  | -1.69  |
| Q9Y281 COF2_HUMAN Cofilin-2                         | 4  |                                             | HEWQVNGLDDIK                            | 132 | 12 | 5  | 34.22  | b7b8*b8b11y3                                      | 1453.69 | 39.873  | 124916 | 3 | 485.23  | -13.60 |
| Q9Y281 COF2_HUMAN Cofilin-2                         | 5  |                                             | SSTQEEIK                                | 22  | 8  | 3  | 33.07  | b3y5y6                                            | 921.46  | 56.204  | 2839   | 2 | 461.24  | 13.58  |
| Q9Y281 COF2_HUMAN Cofilin-2                         | 6  | Carbamidomethyl+C(6)                        | KAVLFCLSDDK                             | 33  | 11 | 4  | 24.29  | b10y7y10*y10                                      | 1295.67 | 37.097  | 17373  | 2 | 648.34  | -1.04  |
| P04075 ALDOA_HUMAN Fructose-bisphosphate aldolase A | 1  |                                             | PYQPALTPEQK                             | 1   | 12 | 9  | 47.14  | b3*b3b8*b8b10y8y10*y11y12                         | 1434.73 | 52.839  | 178590 | 2 | 717.87  | -0.68  |
| P04075 ALDOA_HUMAN Fructose-bisphosphate aldolase A | 2  |                                             | IGEHTPSALAIMENANVLAR                    | 153 | 20 | 13 | 65.59  | b5*b5b6b8*b8b10y1y3y5y6y8y15y20                   | 2107.09 | 81.011  | 163796 | 3 | 703.03  | -5.10  |

|                                                      |    |                      |                              |     |    |    |        |                                                            |         |         |        |   |         |        |
|------------------------------------------------------|----|----------------------|------------------------------|-----|----|----|--------|------------------------------------------------------------|---------|---------|--------|---|---------|--------|
| [P04075]ALDOA_HUMAN Fructose-bisphosphate aldolase A | 3  | Carbamidomethyl+C(5) | YASICQQNGIVPIVEPEILPDGDHDLKR | 173 | 28 | 21 | 120.29 | b2b9b10*b10b11*b11b12y1y2y3y5y7y8y9y10y13*y13y14*y14y17y28 | 3176.58 | 76.432  | 113156 | 4 | 794.90  | -6.76  |
| [P04075]ALDOA_HUMAN Fructose-bisphosphate aldolase A | 4  |                      | GILAADESTGSIK                | 28  | 14 | 7  | 60.67  | b3b8y9y10y11y12y14                                         | 1332.70 | 48.739  | 42096  | 2 | 666.85  | 1.19   |
| [P04075]ALDOA_HUMAN Fructose-bisphosphate aldolase A | 5  |                      | GVVPLAGTNGETTTQGLDGLSER      | 111 | 23 | 8  | 65.3   | b3y5y6y7y8y14y15y23                                        | 2272.15 | 65.266  | 38608  | 2 | 1136.58 | 5.59   |
| [P04075]ALDOA_HUMAN Fructose-bisphosphate aldolase A | 6  |                      | LQSIGTENTEENRR               | 43  | 14 | 13 | 51.25  | b2*b2b3*b3b8b10*b10y10*y10y12*y12y13*y13                   | 1646.79 | 29.480  | 37598  | 3 | 549.60  | -11.64 |
| [P04075]ALDOA_HUMAN Fructose-bisphosphate aldolase A | 7  |                      | AAQEEYVKR                    | 322 | 9  | 4  | 38.25  | y2y3y4y6                                                   | 1093.56 | 20.400  | 8588   | 2 | 547.28  | -4.47  |
| [P04075]ALDOA_HUMAN Fructose-bisphosphate aldolase A | 8  | Carbamidomethyl+C(4) | VNPCIQGGVILFHETLYQK          | 69  | 18 | 3  | 15.57  | b4b13y6                                                    | 2088.07 | 79.735  | 47286  | 3 | 696.69  | -12.39 |
| [P04075]ALDOA_HUMAN Fructose-bisphosphate aldolase A | 9  |                      | AAQEEYVK                     | 322 | 8  | 3  | 36.08  | b4b7y5                                                     | 937.48  | 49.391  | 24948  | 2 | 469.24  | 17.25  |
| [P04075]ALDOA_HUMAN Fructose-bisphosphate aldolase A | 10 | Carbamidomethyl+C(1) | CPLKWPWALTFSYGR              | 289 | 15 | 5  | 31.8   | b3b7y9*y9y10                                               | 1808.94 | 85.937  | 22493  | 3 | 603.65  | -4.32  |
| [P04075]ALDOA_HUMAN Fructose-bisphosphate aldolase A | 11 |                      | MPYQYPALTPEQK                | 0   | 13 | 4  | 34.05  | b3b6b8y6                                                   | 1565.76 | 33.518  | 2245   | 3 | 522.59  | -4.29  |
| [P04075]ALDOA_HUMAN Fructose-bisphosphate aldolase A | 12 |                      | VDKGVVPLAGTNGETTTQGLDGLSER   | 108 | 26 | 8  | 30.14  | b5b15y5y10y12*y12y14*y14                                   | 2614.32 | 61.014  | 46740  | 3 | 872.11  | -3.18  |
| [P04075]ALDOA_HUMAN Fructose-bisphosphate aldolase A | 13 | Carbamidomethyl+C(1) | CVLKIGEHTPSALAIMENANVLAR     | 149 | 24 | 4  | 23.41  | b3y11y13y14                                                | 2607.40 | 103.650 | 4088   | 4 | 652.61  | 10.96  |
| [P04075]ALDOA_HUMAN Fructose-bisphosphate aldolase A | 14 | Phosphoryl STY(9)    | LQSIGTENTEENR                | 43  | 13 | 4  | 20.63  | b7b9y3*y3                                                  | 1570.68 | 35.257  | 17936  | 3 | 524.23  | 9.09   |
| [P04075]ALDOA_HUMAN Fructose-bisphosphate aldolase A | 15 | Phosphoryl STY(12)   | GVVPLAGTNGETTTQGLDGLSER      | 111 | 23 | 4  | 13.04  | b12_H3PO4<br>b12y8y11*y11                                  | 2352.13 | 69.744  | 2519   | 2 | 1176.57 | 12.87  |
| [P04075]ALDOA_HUMAN Fructose-bisphosphate aldolase A | 16 |                      | GETTTQGLDGLSER               | 120 | 14 | 1  | 7.95   | b12                                                        | 1463.70 | 65.190  | 14193  | 2 | 732.35  | 1.42   |
| [P04075]ALDOA_HUMAN Fructose-bisphosphate aldolase A | 17 |                      | PIVEPEILPDGDHDLKR            | 184 | 17 | 2  | 22.31  | b3b4                                                       | 1943.02 | 76.434  | 3267   | 2 | 972.02  | 0.75   |
| [P04075]ALDOA_HUMAN Fructose-bisphosphate aldolase A | 18 |                      | QEEYVKR                      | 324 | 7  | 0  | 1.62   |                                                            | 951.49  | 20.388  | 3182   | 2 | 476.25  | 3.53   |
| [P04075]ALDOA_HUMAN Fructose-bisphosphate aldolase A | 19 |                      | PDGDHDLKR                    | 192 | 9  | 2  | 22.31  | b3b4                                                       | 1052.51 | 76.458  | 2987   | 1 | 1052.51 | -2.44  |
| [P04075]ALDOA_HUMAN Fructose-bisphosphate aldolase A | 20 |                      | AQEEYVKR                     | 323 | 8  | 0  | 1.62   |                                                            | 1022.53 | 20.399  | 2777   | 2 | 511.77  | -0.72  |
| [P04075]ALDOA_HUMAN Fructose-bisphosphate aldolase A | 21 |                      | SIGTENTEENRR                 | 45  | 12 | 0  | 3.64   |                                                            | 1405.68 | 29.459  | 2148   | 2 | 703.34  | 5.99   |
| [Q3ZCM7]TBB8_HUMAN Tubulin beta-8 chain              | 1  |                      | LAVNMVPPFR                   | 252 | 10 | 12 | 99.95  | b2b3b5y1y4y5y6y7*y7y8y9y10                                 | 1143.63 | 72.920  | 246238 | 2 | 572.32  | -1.81  |
| [Q3ZCM7]TBB8_HUMAN Tubulin beta-8 chain              | 2  |                      | AVLVDLEPGTMDSVR              | 62  | 15 | 8  | 29.42  | b1b2b3y2y8y9y11y15                                         | 1601.82 | 71.150  | 50258  | 2 | 801.41  | -2.97  |
| [Q3ZCM7]TBB8_HUMAN Tubulin beta-8 chain              | 3  |                      | LHFFMPGFAPLTSR               | 262 | 14 | 9  | 79.14  | b2b3b4b8b9b13y3y5y12                                       | 1620.81 | 89.791  | 44064  | 3 | 540.94  | -14.46 |
| [Q3ZCM7]TBB8_HUMAN Tubulin beta-8 chain              | 4  |                      | IREEYPDR                     | 154 | 8  | 6  | 36.08  | b2b4b7y1y3y8                                               | 1077.53 | 25.572  | 26155  | 2 | 539.27  | -3.40  |
| [Q3ZCM7]TBB8_HUMAN Tubulin beta-8 chain              | 5  |                      | MSATFIGNNTAIQELFK            | 362 | 17 | 6  | 34.5   | b1b11*b11b12b13*b13                                        | 1884.98 | 97.376  | 3443   | 2 | 942.99  | 12.50  |
| [Q3ZCM7]TBB8_HUMAN Tubulin beta-8 chain              | 6  |                      | VSEQFTAMFR                   | 380 | 10 | 3  | 26.89  | b4y4y8                                                     | 1215.61 | 81.299  | 2044   | 3 | 405.87  | 21.99  |
| [Q3ZCM7]TBB8_HUMAN Tubulin beta-8 chain              | 7  |                      | RVSEQFTAMFR                  | 379 | 11 | 3  | 27.3   | b5b6y5                                                     | 1371.69 | 26.820  | 40699  | 3 | 457.90  | 3.56   |
| [Q3ZCM7]TBB8_HUMAN Tubulin beta-8 chain              | 8  |                      | INVYYNEASGGRYVPR             | 46  | 16 | 14 | 71.37  | b3*b3b4b8*b8*b8b9*b9b12*b12*b12y4y12y13                    | 1857.93 | 116.599 | 15122  | 3 | 619.98  | 1.25   |

|                                                                             |    |                                         |                              |     |    |    |       |                            |         |         |        |   |         |        |
|-----------------------------------------------------------------------------|----|-----------------------------------------|------------------------------|-----|----|----|-------|----------------------------|---------|---------|--------|---|---------|--------|
| Q3ZCM7 TBB8_HUMAN Tubulin beta-8 chain                                      | 9  | Phosphoryl STY()                        | VSEQFTAMFRR                  | 380 | 11 | 5  | 36.71 | b6y4y9y10*y10              | 1451.62 | 32.088  | 10762  | 2 | 726.31  | -13.20 |
| Q13509 TBB3_HUMAN Tubulin beta-3 chain                                      | 1  |                                         | LAVNMVPPFR                   | 252 | 10 | 12 | 99.95 | b2b3b5y1y4y5y6y7*y7y8y9y10 | 1143.63 | 72.920  | 246238 | 2 | 572.32  | -1.81  |
| Q13509 TBB3_HUMAN Tubulin beta-3 chain                                      | 2  |                                         | IMNTFSVVSPK                  | 162 | 12 | 8  | 68.89 | b10y4*y4y7y8y9y11y12       | 1319.70 | 63.948  | 105530 | 2 | 660.36  | 1.57   |
| Q13509 TBB3_HUMAN Tubulin beta-3 chain                                      | 3  |                                         | ALTVPELTQQMFDK               | 282 | 15 | 8  | 62.33 | y1y3y5*y5y7y9y11y15        | 1691.87 | 86.070  | 31987  | 2 | 846.44  | 3.25   |
| Q13509 TBB3_HUMAN Tubulin beta-3 chain                                      | 4  |                                         | FWEVISDEHGIDPSGNYVGDSDLQLER  | 19  | 27 | 9  | 52.63 | b5*b5b6y3*y3y4y8y9y27      | 3077.38 | 118.566 | 28888  | 4 | 770.10  | -11.66 |
| Q13509 TBB3_HUMAN Tubulin beta-3 chain                                      | 5  |                                         | SGAFGHLFRPDNFIFGQSGAGNNWAK   | 77  | 26 | 5  | 27.46 | b4b5b11b14y14              | 2795.34 | 81.405  | 1761   | 2 | 1398.18 | -0.09  |
| Q13509 TBB3_HUMAN Tubulin beta-3 chain                                      | 6  |                                         | VREEYPDR                     | 154 | 8  | 5  | 49.3  | b5*b5y4y6y7                | 1063.52 | 58.941  | 4361   | 2 | 532.26  | 5.39   |
| Q13509 TBB3_HUMAN Tubulin beta-3 chain                                      | 7  | Oxidation+M(1)                          | MSSTFIGNSTAIQELFK            | 362 | 17 | 5  | 16.3  | b14*b14*b14y11y13          | 1889.94 | 136.744 | 4677   | 1 | 1889.94 | 2.71   |
| O15145 ARPC3_HUMAN Actin-related protein 2/3 complex subunit 3              | 1  |                                         | LIGNMALLPIR                  | 14  | 11 | 7  | 65.48 | b2y3y4y5y6y9y11            | 1210.72 | 83.062  | 27320  | 2 | 605.87  | -8.47  |
| O15145 ARPC3_HUMAN Actin-related protein 2/3 complex subunit 3              | 2  |                                         | ETKDTDIVDEAIYYFK             | 34  | 16 | 3  | 17.15 | b12y9y11                   | 1949.92 | 79.212  | 1749   | 3 | 650.64  | -10.52 |
| O15145 ARPC3_HUMAN Actin-related protein 2/3 complex subunit 3              | 3  |                                         | PAYHSSLMDPDTK                | 1   | 13 | 3  | 28.11 | y3y9y10                    | 1461.70 | 40.679  | 61877  | 3 | 487.90  | 20.04  |
| O15145 ARPC3_HUMAN Actin-related protein 2/3 complex subunit 3              | 4  |                                         | VFDPNQDKPSK                  | 147 | 11 | 6  | 36.71 | b4*b4b6b7y7*y7             | 1274.63 | 48.245  | 3710   | 3 | 425.55  | -7.37  |
| O15145 ARPC3_HUMAN Actin-related protein 2/3 complex subunit 3              | 5  | Carbamidomethyl+C(4)                    | WWTCFVK                      | 158 | 7  | 5  | 50.65 | b3*b3b5b6y6                | 1026.48 | 31.243  | 3623   | 2 | 513.75  | -2.62  |
| O15145 ARPC3_HUMAN Actin-related protein 2/3 complex subunit 3              | 6  |                                         | MPAYHSSLMDPDTK               | 0   | 14 | 5  | 30.72 | b7*b7y3y4y10               | 1592.71 | 33.589  | 3459   | 2 | 796.86  | 0.54   |
| O15145 ARPC3_HUMAN Actin-related protein 2/3 complex subunit 3              | 7  |                                         | DTDIVDEAIYYFK                | 37  | 13 | 7  | 56.28 | b6b10y7*y7y8y9y12          | 1591.78 | 95.922  | 2248   | 2 | 796.39  | 14.57  |
| O15145 ARPC3_HUMAN Actin-related protein 2/3 complex subunit 3              | 8  |                                         | SQGEK                        | 88  | 5  | 1  | 13.21 | y4                         | 548.27  | 97.617  | 2217   | 1 | 548.27  | 12.69  |
| O15145 ARPC3_HUMAN Actin-related protein 2/3 complex subunit 3              | 9  |                                         | QFMNKSLSGPQ                  | 166 | 12 | 3  | 22.26 | b5b11y5                    | 1293.63 | 76.407  | 3686   | 2 | 647.32  | 2.55   |
| O15145 ARPC3_HUMAN Actin-related protein 2/3 complex subunit 3              | 10 | Carbamidomethyl+C(12):Phosphoryl STY(8) | TLIYITLYISECLK               | 66  | 14 | 4  | 19.27 | b8*b8b10y6                 | 1809.93 | 65.093  | 2649   | 2 | 905.47  | 13.42  |
| A6NKZ8 YI016_HUMAN Putative tubulin beta chain-like protein ENSP00000290377 | 1  |                                         | LAVNMVPPFR                   | 180 | 10 | 12 | 99.95 | b2b3b5y1y4y5y6y7*y7y8y9y10 | 1143.63 | 72.920  | 246238 | 2 | 572.32  | -1.81  |
| A6NKZ8 YI016_HUMAN Putative tubulin beta chain-like protein ENSP00000290377 | 2  |                                         | LHFFMPGFAPLTSR               | 190 | 14 | 9  | 79.14 | b2b3b4b8b9b13y3y5y12       | 1620.81 | 89.791  | 44064  | 3 | 540.94  | -14.46 |
| A6NKZ8 YI016_HUMAN Putative tubulin beta chain-like protein ENSP00000290377 | 3  |                                         | IREEYPDR                     | 82  | 8  | 6  | 36.08 | b2b4b7y1y3y8               | 1077.53 | 25.572  | 26155  | 2 | 539.27  | -3.40  |
| A6NKZ8 YI016_HUMAN Putative tubulin beta chain-like protein ENSP00000290377 | 4  | Carbamidomethyl+C(18)                   | MSASFIGNNAAIQELFTCVSEQFTAMFR | 290 | 28 | 5  | 40.74 | b8b11b13b14b15             | 3170.47 | 83.728  | 3504   | 3 | 1057.50 | -0.92  |

|                                                                             |    |                                                                     |                                       |      |    |    |        |                                                               |         |         |         |   |         |        |
|-----------------------------------------------------------------------------|----|---------------------------------------------------------------------|---------------------------------------|------|----|----|--------|---------------------------------------------------------------|---------|---------|---------|---|---------|--------|
| A6NKZ8 YI016_HUMAN Putative tubulin beta chain-like protein ENSP00000290377 | 5  | Carbamidomethyl+C(22)                                               | DSVRSQPFQVLRPDNFIQGCAG<br>GNNWAK      | 1    | 30 | 3  | 11.37  | b16y6y14                                                      | 3294.62 | 86.699  | 6566    | 4 | 824.41  | 8.82   |
| A6NKZ8 YI016_HUMAN Putative tubulin beta chain-like protein ENSP00000290377 | 6  | Carbamidomethyl+C(26)                                               | TLKLPTPTYGDLNHLVSATMSGV<br>TTCLR      | 141  | 28 | 4  | 22.31  | b27y10y11y15                                                  | 3046.57 | 95.819  | 5301    | 5 | 610.12  | -1.04  |
| A6NKZ8 YI016_HUMAN Putative tubulin beta chain-like protein ENSP00000290377 | 7  |                                                                     | YTEGAELTESVMDVVRK                     | 33   | 17 | 4  | 26.13  | b5b11b14y12                                                   | 1926.97 | 110.048 | 3623    | 2 | 963.99  | 13.49  |
| A6NKZ8 YI016_HUMAN Putative tubulin beta chain-like protein ENSP00000290377 | 8  |                                                                     | GSQQYRALTVAEQTQMFDAK                  | 204  | 21 | 19 | 92.21  | b4*b4b6b8*b8*b8b13*b<br>13b17b20y3*y3y5y7y8*<br>y8y12*y12*y12 | 2385.19 | 116.624 | 2050    | 2 | 1193.10 | 0.61   |
| A6NKZ8 YI016_HUMAN Putative tubulin beta chain-like protein ENSP00000290377 | 9  | Carbamidomethyl+C(18);<br>Oxidation+M(1)                            | MSASFIGNNAAIQELFTCVSEQFTA<br>MFR      | 290  | 28 | 4  | 14.89  | b11b15y6y10                                                   | 3186.47 | 85.266  | 44772   | 3 | 1062.83 | -0.46  |
| P31146 COR1A_HUMAN Coronin-1A                                               | 1  |                                                                     | YFEITSEAPFLHYLSMFSSK                  | 293  | 20 | 10 | 58.64  | b2b3b4b7y4y6y8y9y12y<br>20                                    | 2397.14 | 108.301 | 35937   | 3 | 799.72  | -3.26  |
| P31146 COR1A_HUMAN Coronin-1A                                               | 2  |                                                                     | AAPEASGTPSSDAVSR                      | 416  | 16 | 12 | 90.03  | b2b5b6b13y8y9y10y11*<br>y11y12y14y16                          | 1502.71 | 28.285  | 23158   | 2 | 751.86  | 0.16   |
| P31146 COR1A_HUMAN Coronin-1A                                               | 3  | Carbamidomethyl+C(32)                                               | HLEEPSLQELDTSSGVLLPFDFPD<br>TNIVYLCGK | 253  | 34 | 7  | 26.32  | b11b19y4y5y12y15y34                                           | 3846.92 | 111.661 | 11702   | 3 | 1282.98 | 2.22   |
| P31146 COR1A_HUMAN Coronin-1A                                               | 4  | Carbamidomethyl+C(11)                                               | VSQTTWDSGFCAVNPK                      | 29   | 16 | 3  | 23.68  | b13b14y14                                                     | 1796.85 | 61.668  | 19570   | 2 | 898.93  | 13.32  |
| P31146 COR1A_HUMAN Coronin-1A                                               | 5  | Carbamidomethyl+C(1)                                                | CEIAR                                 | 331  | 5  | 1  | 13.21  | b4                                                            | 648.31  | 84.892  | 3708    | 1 | 648.31  | 0.47   |
| P31146 COR1A_HUMAN Coronin-1A                                               | 6  | Carbamidomethyl+C(12)                                               | HVFQPAKADQCYEDVR                      | 12   | 17 | 5  | 41.56  | b14y8y11y12y13                                                | 2019.96 | 54.656  | 555159  | 3 | 673.99  | 10.94  |
| P31146 COR1A_HUMAN Coronin-1A                                               | 7  |                                                                     | KSDLFQEDLYPPTAGPDPALTAEE<br>WLGGR     | 354  | 29 | 12 | 93.01  | b4b8b10y3y4y5y7y8y9y<br>10y12y19                              | 3173.55 | 95.465  | 69457   | 3 | 1058.52 | 2.92   |
| P31146 COR1A_HUMAN Coronin-1A                                               | 8  |                                                                     | ESQRGMGYMPK                           | 313  | 11 | 3  | 31.28  | y3y4y10                                                       | 1283.60 | 136.365 | 4661    | 1 | 1283.60 | 6.94   |
| P31146 COR1A_HUMAN Coronin-1A                                               | 9  |                                                                     | RAAPEASGTPSSDAVSR                     | 415  | 17 | 4  | 26.13  | b12y5y7y16                                                    | 1658.80 | 67.489  | 3164    | 3 | 553.60  | -5.81  |
| P31146 COR1A_HUMAN Coronin-1A                                               | 10 |                                                                     | ILTTGFSRMSER                          | 233  | 12 | 4  | 35.48  | y6y7*y7y8                                                     | 1397.74 | 101.877 | 3151    | 2 | 699.37  | 13.80  |
| P31146 COR1A_HUMAN Coronin-1A                                               | 11 | Carbamidomethyl+C(6);<br>Carbamidomethyl+C(9);<br>Phosphoryl STY(7) | DGGLICTSCRDK                          | 186  | 12 | 6  | 34.22  | b8_HPO3<br>b8*b8y5y6_H3PO4<br>y6*y6y8_HPO3 y8                 | 1461.56 | 18.148  | 17738   | 3 | 487.86  | -12.95 |
| P31146 COR1A_HUMAN Coronin-1A                                               | 12 | Phosphoryl STY(8)                                                   | AAPEASGTPSSDAVSR                      | 416  | 16 | 6  | 17.15  | b5*b5b7*b7y7*y7                                               | 1582.65 | 71.241  | 7788    | 3 | 528.22  | -10.88 |
| P31146 COR1A_HUMAN Coronin-1A                                               | 13 | Phosphoryl STY(5)                                                   | EPVVTLEGHTKR                          | 121  | 12 | 3  | 26.24  | b4y8y9                                                        | 1445.70 | 51.787  | 7188    | 2 | 723.36  | -0.42  |
| Q6S8J3 A26CA_HUMAN ANKRD26-like family C member 1A                          | 1  |                                                                     | AGFAGDDAPR                            | 718  | 10 | 19 | 144.36 | b2b3b4b5b8*b8y1y2y3y<br>4*y4y5y6*y6y7*y7y8y9y<br>10           | 976.44  | 31.402  | 2485698 | 2 | 488.72  | -6.13  |
| Q6S8J3 A26CA_HUMAN ANKRD26-like family C member 1A                          | 2  |                                                                     | AVFPSIVGRPR                           | 728  | 11 | 15 | 136.98 | b2b3b4b9y1y2y3y4y5y6<br>y7y8y9y10y11                          | 1198.70 | 56.143  | 1059745 | 2 | 599.86  | -2.24  |
| Q6S8J3 A26CA_HUMAN ANKRD26-like family C member 1A                          | 3  |                                                                     | QEYDESGPSIVHRK                        | 1059 | 14 | 19 | 139.44 | b3*b3*b3b14y2y3y4y5y<br>6*y6y7y8y9y10*y10y11<br>y12y14*y14    | 1644.78 | 32.265  | 409068  | 3 | 548.93  | -12.62 |
| Q6S8J3 A26CA_HUMAN ANKRD26-like family C member 1A                          | 4  | Carbamidomethyl+C(2)                                                | LCYVALDFEQEMATAASSSSLEK               | 915  | 23 | 19 | 118.82 | b2b3b6b12*b12y1y4y6y<br>7y8*y8y9*y9y10y11*y11<br>y12y13y23    | 2550.17 | 93.253  | 208186  | 3 | 850.73  | -0.67  |

|                                                    |    |                                             |                                                        |      |    |    |        |                                            |         |         |        |   |         |        |
|----------------------------------------------------|----|---------------------------------------------|--------------------------------------------------------|------|----|----|--------|--------------------------------------------|---------|---------|--------|---|---------|--------|
| Q6S8J3 A26CA_HUMAN ANKRD26-like family C member 1A | 5  |                                             | QEYDESGPSIVHR                                          | 1059 | 13 | 14 | 111.95 | y1y2y3y4y5y6y8y9°y9y10y11°y11y13*y13       | 1516.68 | 38.036  | 189555 | 3 | 506.23  | -13.60 |
| Q6S8J3 A26CA_HUMAN ANKRD26-like family C member 1A | 6  |                                             | SYELPDGQVITIGNER                                       | 938  | 16 | 4  | 17.15  | b6y2y9y14                                  | 1790.87 | 71.932  | 24055  | 3 | 597.63  | -10.22 |
| Q6S8J3 A26CA_HUMAN ANKRD26-like family C member 1A | 7  |                                             | IWHHTFYNELR                                            | 784  | 11 | 10 | 81.91  | b4b9y2y3y5*y5y6y7y8y11                     | 1515.75 | 56.173  | 16028  | 2 | 758.38  | 0.72   |
| Q6S8J3 A26CA_HUMAN ANKRD26-like family C member 1A | 8  |                                             | DVLHENSTLR                                             | 642  | 10 | 3  | 33.88  | b5b8b9                                     | 1183.60 | 50.877  | 240783 | 2 | 592.30  | -8.97  |
| Q6S8J3 A26CA_HUMAN ANKRD26-like family C member 1A | 9  |                                             | ISSENSNPEQELK                                          | 367  | 13 | 4  | 20.63  | b4y8*y8y12                                 | 1474.72 | 72.002  | 18182  | 3 | 492.24  | 9.02   |
| Q6S8J3 A26CA_HUMAN ANKRD26-like family C member 1A | 10 |                                             | HGSTHVGFPPENLTNGATAGNGDDGLIPPR                         | 544  | 29 | 4  | 11.52  | b7y11°y11y14                               | 2901.41 | 106.514 | 2463   | 3 | 967.81  | 6.90   |
| Q6S8J3 A26CA_HUMAN ANKRD26-like family C member 1A | 11 |                                             | KHGSTHVGFPPENLTNGATAGNGDDGLIPPR                        | 543  | 30 | 3  | 17.28  | b7b11b13                                   | 3029.46 | 112.804 | 26955  | 3 | 1010.49 | -5.80  |
| Q6S8J3 A26CA_HUMAN ANKRD26-like family C member 1A | 12 |                                             | ISSENSNPEQELKLTSEESQR                                  | 367  | 22 | 3  | 13.43  | b14y13y21                                  | 2534.18 | 80.186  | 5261   | 3 | 845.40  | -1.83  |
| Q6S8J3 A26CA_HUMAN ANKRD26-like family C member 1A | 13 | Oxidation+M(1)                              | MSQELEINKDGR                                           | 400  | 13 | 3  | 20.63  | b9b12y7                                    | 1550.72 | 58.868  | 9031   | 2 | 775.86  | 4.64   |
| Q6S8J3 A26CA_HUMAN ANKRD26-like family C member 1A | 14 | Oxidation+M()                               | DLYTNTVLSGGTTMYPGMAHR                                  | 991  | 21 | 3  | 22.32  | b9b10y15                                   | 2301.10 | 74.411  | 4185   | 3 | 767.70  | 14.01  |
| Q6S8J3 A26CA_HUMAN ANKRD26-like family C member 1A | 15 | Oxidation+M()                               | EVEEEMKK                                               | 413  | 8  | 3  | 36.08  | b3b7y5                                     | 1037.48 | 101.222 | 2796   | 2 | 519.24  | 0.35   |
| Q13418 ILK_HUMAN Integrin-linked protein kinase    | 1  |                                             | FDMIVPILEK                                             | 438  | 10 | 9  | 57.3   | b2b3°b3b4°b4y1y5y6y7                       | 1204.66 | 88.698  | 87503  | 2 | 602.83  | -3.55  |
| Q13418 ILK_HUMAN Integrin-linked protein kinase    | 2  | Carbamidomethyl+C(14)                       | IFSHPNVLPVLGACQSPPHPTLI THWMPYGSYLVNVLHEGTNFVVD QSQAVK | 243  | 53 | 16 | 46.58  | b1b4°b4b5b7°b7b8b10b16°b16y6°y6y7°y7y14y37 | 5863.86 | 101.265 | 75225  | 6 | 978.15  | -14.91 |
| Q13418 ILK_HUMAN Integrin-linked protein kinase    | 3  |                                             | LNENHSGELWK                                            | 198  | 11 | 5  | 36.05  | y6y7y8°y8y11                               | 1326.64 | 41.763  | 60129  | 3 | 442.88  | -5.52  |
| Q13418 ILK_HUMAN Integrin-linked protein kinase    | 4  | Carbamidomethyl+C(5)                        | FSFQCPGR                                               | 341  | 8  | 7  | 36.08  | b2b3°b3b8y3y7y8                            | 998.45  | 50.810  | 52028  | 2 | 499.73  | 0.49   |
| Q13418 ILK_HUMAN Integrin-linked protein kinase    | 5  |                                             | YGEMPVDK                                               | 131  | 8  | 6  | 33.07  | b2b3b4y2y5y8                               | 938.43  | 34.964  | 46454  | 2 | 469.72  | 2.28   |
| Q13418 ILK_HUMAN Integrin-linked protein kinase    | 6  |                                             | EVPFADLSNMEIGMK                                        | 388  | 15 | 4  | 26.21  | y1y3y6y13                                  | 1680.81 | 84.705  | 34744  | 2 | 840.91  | 8.93   |
| Q13418 ILK_HUMAN Integrin-linked protein kinase    | 7  |                                             | SAVVEMLIMR                                             | 46   | 10 | 4  | 20.67  | b1b3b6°b6                                  | 1148.61 | 79.745  | 30594  | 2 | 574.81  | -3.08  |
| Q13418 ILK_HUMAN Integrin-linked protein kinase    | 8  | Carbamidomethyl+C(25)                       | LWLDNTENDLNQGGDDHGFSPLH WACR                           | 17   | 26 | 5  | 22.8   | b2y4y5y18y26                               | 3110.40 | 82.259  | 20861  | 3 | 1037.47 | 6.20   |
| Q13418 ILK_HUMAN Integrin-linked protein kinase    | 9  | Carbamidomethyl+C(18);Carbamidomethyl+C(39) | ADINAVNEHGNVPLHYACFWGQD QVAEDLVANGALVSICNK             | 90   | 41 | 4  | 52.24  | y3y4y5y6                                   | 4509.13 | 90.446  | 17382  | 4 | 1128.04 | -0.11  |
| Q13418 ILK_HUMAN Integrin-linked protein kinase    | 10 |                                             | GDDTPLHLAASHGHR                                        | 65   | 15 | 6  | 37.07  | b7b11°b11y4y7y8                            | 1583.76 | 35.577  | 14276  | 3 | 528.59  | -6.24  |
| Q13418 ILK_HUMAN Integrin-linked protein kinase    | 11 |                                             | SADMWSFAVLLWELVTR                                      | 371  | 17 | 3  | 16.3   | b4y4y7                                     | 2024.04 | 137.484 | 3598   | 2 | 1012.52 | 1.99   |
| Q13418 ILK_HUMAN Integrin-linked protein kinase    | 12 |                                             | FALDMAR                                                | 296  | 7  | 3  | 37.44  | b4b5y3                                     | 823.40  | 50.748  | 2431   | 2 | 412.20  | -17.72 |

|                                                    |    |                       |                                         |      |    |    |        |                                                            |         |         |         |   |         |        |
|----------------------------------------------------|----|-----------------------|-----------------------------------------|------|----|----|--------|------------------------------------------------------------|---------|---------|---------|---|---------|--------|
| Q13418 ILK_HUMAN Integrin-linked protein kinase    | 13 | Carbamidomethyl+C(34) | EVPFADLSNMEIGMKVALEGLRPT<br>IPPGISPHVCK | 388  | 35 | 12 | 43.86  | b5b77b7b10b12*b12b13<br>%b13y4y6y7y17                      | 3802.96 | 116.613 | 43804   | 4 | 951.49  | -3.60  |
| Q13418 ILK_HUMAN Integrin-linked protein kinase    | 14 |                       | QLNFLTCLNENHSGELWK                      | 191  | 18 | 4  | 22.97  | b3*b3y8y9                                                  | 2171.13 | 100.601 | 14483   | 2 | 1086.07 | 1.69   |
| Q13418 ILK_HUMAN Integrin-linked protein kinase    | 15 | Carbamidomethyl+C(5)  | LMKICMNEDPAK                            | 423  | 12 | 5  | 22.26  | b10y5*y5y10*y10                                            | 1449.70 | 50.913  | 7225    | 2 | 725.36  | 9.94   |
| Q13418 ILK_HUMAN Integrin-linked protein kinase    | 16 | Carbamidomethyl+C(7)  | DDIFTQCREGNAVAVR                        | 1    | 16 | 5  | 37.35  | b5*b5y11y12y13                                             | 1850.91 | 78.600  | 6476    | 2 | 925.96  | 14.31  |
| Q13418 ILK_HUMAN Integrin-linked protein kinase    | 17 | Oxidation+M(10)       | EVPFADLSNMEIGMK                         | 388  | 15 | 3  | 18.12  | b3b10y5                                                    | 1696.80 | 71.048  | 15609   | 3 | 566.27  | 5.25   |
| Q13418 ILK_HUMAN Integrin-linked protein kinase    | 18 | Oxidation+M()         | SADMWSFAVLLWELVTREVPFAD<br>LSNMEIGMK    | 371  | 32 | 4  | 11.14  | b12y6*y6y13                                                | 3701.79 | 126.324 | 3892    | 4 | 926.20  | -3.36  |
| Q13418 ILK_HUMAN Integrin-linked protein kinase    | 19 | Oxidation+M(8)        | SVMIDEDMTAR                             | 323  | 11 | 3  | 24.29  | b6y5y10                                                    | 1283.57 | 67.215  | 1689    | 3 | 428.53  | 8.94   |
| Q13418 ILK_HUMAN Integrin-linked protein kinase    | 20 |                       | LNENHSGELWK                             | 198  | 11 | 3  | 24.29  | b9y5y10                                                    | 1309.63 | 41.804  | 2176    | 3 | 437.21  | 10.16  |
| Q9BUF5 TBB6_HUMAN Tubulin beta-6 chain             | 1  |                       | LAVNMVPPFR                              | 252  | 10 | 12 | 99.95  | b2b3b5y1y4y5y6y7*y7y<br>8y9y10                             | 1143.63 | 72.920  | 246238  | 2 | 572.32  | -1.81  |
| Q9BUF5 TBB6_HUMAN Tubulin beta-6 chain             | 2  |                       | LHFFMPGFAPLTSR                          | 262  | 14 | 9  | 79.14  | b2b3b4b8b9b13y3y5y12                                       | 1620.81 | 89.791  | 44064   | 3 | 540.94  | -14.46 |
| Q9BUF5 TBB6_HUMAN Tubulin beta-6 chain             | 3  |                       | SGPFGQLFRPDNFIFGQTGAGNN<br>WAK          | 77   | 26 | 6  | 21.91  | b1b6*b6y2y4y5                                              | 2826.33 | 88.556  | 3607    | 4 | 707.34  | -14.51 |
| Q9BUF5 TBB6_HUMAN Tubulin beta-6 chain             | 4  |                       | MASTFIGNSTAIQELFKR                      | 362  | 18 | 4  | 29.13  | b6b15y12y13                                                | 2014.03 | 86.915  | 26168   | 3 | 672.02  | -4.24  |
| Q9BUF5 TBB6_HUMAN Tubulin beta-6 chain             | 5  |                       | RISEQFSAMFR                             | 379  | 11 | 4  | 41.48  | b10y5y6y7                                                  | 1371.70 | 94.154  | 1570    | 2 | 686.35  | 12.73  |
| Q9BUF5 TBB6_HUMAN Tubulin beta-6 chain             | 6  | Oxidation+M(11)       | ALTVPELTQQMFDAR                         | 282  | 15 | 3  | 18.12  | b5b10y10                                                   | 1735.85 | 66.708  | 5219    | 3 | 579.29  | -8.02  |
| Q9BUF5 TBB6_HUMAN Tubulin beta-6 chain             | 7  | Oxidation+M()         | IMNTFSVMPSPK                            | 162  | 12 | 5  | 22.26  | b4*b4b7*b7y7                                               | 1367.68 | 87.369  | 3633    | 2 | 684.34  | 5.80   |
| A6NNZ2 TBB8B_HUMAN Tubulin beta-8 chain B          | 1  |                       | LAVNMVPPFR                              | 252  | 10 | 12 | 99.95  | b2b3b5y1y4y5y6y7*y7y<br>8y9y10                             | 1143.63 | 72.920  | 246238  | 2 | 572.32  | -1.81  |
| A6NNZ2 TBB8B_HUMAN Tubulin beta-8 chain B          | 2  |                       | LHFFMPGFAPLTSR                          | 262  | 14 | 9  | 79.14  | b2b3b4b8b9b13y3y5y12                                       | 1620.81 | 89.791  | 44064   | 3 | 540.94  | -14.46 |
| A6NNZ2 TBB8B_HUMAN Tubulin beta-8 chain B          | 3  |                       | IREEYPDR                                | 154  | 8  | 6  | 36.08  | b2b4b7y1y3y8                                               | 1077.53 | 25.572  | 26155   | 2 | 539.27  | -3.40  |
| A6NNZ2 TBB8B_HUMAN Tubulin beta-8 chain B          | 4  | Carbamidomethyl+C(18) | MSATFIGNNAIQELFTCVSEQFT<br>AMFR         | 362  | 28 | 9  | 53.88  | b4*b4b12b13b14y3y4y8<br>y12                                | 3184.46 | 110.954 | 2175    | 3 | 1062.16 | -9.74  |
| A6NNZ2 TBB8B_HUMAN Tubulin beta-8 chain B          | 5  |                       | YTEGAELTESVMDVVR                        | 105  | 16 | 5  | 28.32  | b5b6b8*b8y6                                                | 1798.85 | 39.879  | 1777    | 3 | 600.29  | -2.10  |
| A6NNZ2 TBB8B_HUMAN Tubulin beta-8 chain B          | 6  | Carbamidomethyl+C(3)  | HGCYLTVAAIFR                            | 306  | 12 | 3  | 26.24  | b5y10y11                                                   | 1407.69 | 93.284  | 1683    | 2 | 704.35  | -19.25 |
| A6NNZ2 TBB8B_HUMAN Tubulin beta-8 chain B          | 7  | Phosphoryl STY()      | YTEGAELTESVMDVVR                        | 105  | 16 | 4  | 30.77  | b5b9y6y7                                                   | 1878.83 | 35.561  | 4693    | 3 | 626.95  | 11.44  |
| A5A3E0 A26CB_HUMAN ANKRD26-like family C member 1B | 1  |                       | AGFAGDDAPR                              | 718  | 10 | 19 | 144.36 | b2b3b4b5b8*b8y1y2y3y<br>4*y4y5y6*y6y7*y7y8y9y<br>10        | 976.44  | 31.402  | 2485698 | 2 | 488.72  | -6.13  |
| A5A3E0 A26CB_HUMAN ANKRD26-like family C member 1B | 2  |                       | AVFPSIVGRPR                             | 728  | 11 | 15 | 136.98 | b2b3b4b9y1y2y3y4y5y6<br>y7y8y9y10y11                       | 1198.70 | 56.143  | 1059745 | 2 | 599.86  | -2.24  |
| A5A3E0 A26CB_HUMAN ANKRD26-like family C member 1B | 3  |                       | QEYDESGPSIVHRK                          | 1059 | 14 | 19 | 139.44 | b3*b3*b3b14y2y3y4y5y<br>6*y6y7y8y9y10*y10y11<br>y12y14*y14 | 1644.78 | 32.265  | 409068  | 3 | 548.93  | -12.62 |
| A5A3E0 A26CB_HUMAN ANKRD26-like family C member 1B | 4  |                       | QEYDESGPSIVHR                           | 1059 | 13 | 14 | 111.95 | y1y2y3y4y5y6y8y9*y9y<br>10y11*y11y13*y13                   | 1516.68 | 38.036  | 189555  | 3 | 506.23  | -13.60 |



|                                                    |    |                                                                         |                                             |      |    |    |       |                                      |         |         |       |   |         |        |
|----------------------------------------------------|----|-------------------------------------------------------------------------|---------------------------------------------|------|----|----|-------|--------------------------------------|---------|---------|-------|---|---------|--------|
| A5A3E0 A26CB_HUMAN ANKRD26-like family C member 1B | 5  |                                                                         | SYELPDGQVITIGNER                            | 938  | 16 | 4  | 17.15 | b6y2y9y14                            | 1790.87 | 71.932  | 24055 | 3 | 597.63  | -10.22 |
| A5A3E0 A26CB_HUMAN ANKRD26-like family C member 1B | 6  |                                                                         | IWHHTFYNELR                                 | 784  | 11 | 10 | 81.91 | b4b9y2y3y5*y5y6y7y8y11               | 1515.75 | 56.173  | 16028 | 2 | 758.38  | 0.72   |
| A5A3E0 A26CB_HUMAN ANKRD26-like family C member 1B | 7  |                                                                         | ISSENSNPEQDLK                               | 367  | 13 | 7  | 32.29 | b12*b12y4*y4y9y10*y10                | 1460.67 | 54.289  | 14347 | 3 | 487.56  | -8.69  |
| A5A3E0 A26CB_HUMAN ANKRD26-like family C member 1B | 8  | Carbamidomethyl+C(2)                                                    | LCYVALDFEQEMATVASSSSLEK                     | 915  | 23 | 4  | 23.13 | y5y6y8*y8                            | 2578.25 | 117.551 | 13710 | 3 | 860.09  | 18.56  |
| A5A3E0 A26CB_HUMAN ANKRD26-like family C member 1B | 9  |                                                                         | EIAALAPSMMK                                 | 1015 | 11 | 4  | 41.48 | b4y3y5y7                             | 1161.60 | 84.477  | 12565 | 2 | 581.31  | 3.15   |
| A5A3E0 A26CB_HUMAN ANKRD26-like family C member 1B | 10 | Carbamidomethyl+C(4);<br>Carbamidomethyl+C(9)                           | AVQCQEDECALMLEHGTDPNIP<br>DEYGNTTLHYAIYNEDK | 212  | 40 | 4  | 10.88 | b6y4y9*y9                            | 4667.12 | 114.749 | 10108 | 4 | 1167.54 | 11.82  |
| A5A3E0 A26CB_HUMAN ANKRD26-like family C member 1B | 11 |                                                                         | DLYTNTVLSGGTMYPGMAHR                        | 991  | 21 | 3  | 13.86 | b8b13y8                              | 2285.11 | 84.032  | 5607  | 3 | 762.38  | 18.70  |
| A5A3E0 A26CB_HUMAN ANKRD26-like family C member 1B | 12 | Carbamidomethyl+C(3)                                                    | QFCEEQNTGLHDEILHIEEK                        | 601  | 21 | 3  | 13.86 | b12b14y14                            | 2582.17 | 87.386  | 5535  | 3 | 861.39  | -19.48 |
| A5A3E0 A26CB_HUMAN ANKRD26-like family C member 1B | 13 | Carbamidomethyl+C(1);<br>Carbamidomethyl+C(9);<br>Carbamidomethyl+C(16) | CPEALFQPCFLGMESCGIHETTENS<br>IMK            | 956  | 28 | 7  | 36.26 | b5b6b8b13b24y10y19                   | 3304.49 | 77.318  | 5057  | 4 | 826.88  | 9.68   |
| A5A3E0 A26CB_HUMAN ANKRD26-like family C member 1B | 14 | Carbamidomethyl+C(12)                                                   | EYAVSSHHVICQLSDYK                           | 342  | 19 | 12 | 80.16 | b3b7*b7b9b11b13y3y9°<br>y9y10*y10y11 | 2286.05 | 115.796 | 3776  | 3 | 762.69  | -21.15 |
| A5A3E0 A26CB_HUMAN ANKRD26-like family C member 1B | 15 |                                                                         | LTSEESQR                                    | 380  | 9  | 3  | 30.47 | b3b6y7                               | 1078.48 | 22.749  | 2600  | 2 | 539.74  | -21.39 |
| A5A3E0 A26CB_HUMAN ANKRD26-like family C member 1B | 16 |                                                                         | TTGIVMDSGDGVTHTVPIYEGNAL<br>PHATLR          | 847  | 30 | 3  | 11.37 | b3b13y11                             | 3122.60 | 112.077 | 2103  | 3 | 1041.54 | 13.06  |
| A5A3E0 A26CB_HUMAN ANKRD26-like family C member 1B | 17 |                                                                         | AAWWGK                                      | 145  | 6  | 2  | 26.83 | b4y5                                 | 718.37  | 80.222  | 2057  | 2 | 359.69  | 10.79  |
| A5A3E0 A26CB_HUMAN ANKRD26-like family C member 1B | 18 |                                                                         | VGAWGDYDDSAFMEPRYHVR                        | 116  | 20 | 4  | 22.6  | b3b6b19y12                           | 2371.03 | 75.403  | 49014 | 3 | 791.01  | -13.08 |
| A5A3E0 A26CB_HUMAN ANKRD26-like family C member 1B | 19 |                                                                         | EEIAMLRLLEDTMK                              | 652  | 14 | 3  | 34.83 | y3y4y5                               | 1691.86 | 76.977  | 13491 | 2 | 846.43  | -5.70  |
| A5A3E0 A26CB_HUMAN ANKRD26-like family C member 1B | 20 |                                                                         | ANLNALDRYGR                                 | 295  | 11 | 3  | 24.29 | b3b8y3                               | 1262.65 | 56.165  | 9463  | 2 | 631.83  | -9.09  |
| A5A3E0 A26CB_HUMAN ANKRD26-like family C member 1B | 21 |                                                                         | ELENFMAIEEMKK                               | 531  | 13 | 4  | 29.65 | b9b11y9y11                           | 1611.77 | 77.271  | 6330  | 2 | 806.39  | -4.39  |
| A5A3E0 A26CB_HUMAN ANKRD26-like family C member 1B | 22 |                                                                         | SRTPENQQFPDNESEEYHR                         | 451  | 19 | 4  | 14.93 | b7*b7b9y3                            | 2363.05 | 77.236  | 6330  | 3 | 788.35  | 8.58   |
| A5A3E0 A26CB_HUMAN ANKRD26-like family C member 1B | 23 |                                                                         | SNVGASGDHDDSAMKTLR                          | 77   | 18 | 6  | 32.55 | y8*y8y10*y10y12y13                   | 1860.84 | 76.433  | 5456  | 3 | 620.95  | -7.94  |

|                                                    |    |                       |                                |      |    |    |       |                                       |         |         |        |   |         |        |
|----------------------------------------------------|----|-----------------------|--------------------------------|------|----|----|-------|---------------------------------------|---------|---------|--------|---|---------|--------|
| A5A3E0 A26CB_HUMAN ANKRD26-like family C member 1B | 24 |                       | SQEPEINKDGR                    | 519  | 12 | 4  | 26.24 | b10*b10b11y11                         | 1387.66 | 47.989  | 4941   | 2 | 694.33  | 11.88  |
| A5A3E0 A26CB_HUMAN ANKRD26-like family C member 1B | 25 |                       | QQGMMGGMHQKESYVGK              | 739  | 17 | 3  | 23.71 | y3y6y13                               | 1895.86 | 62.266  | 4406   | 2 | 948.44  | 3.67   |
| A5A3E0 A26CB_HUMAN ANKRD26-like family C member 1B | 26 | Carbamidomethyl+C(19) | TPENQQFPDNESEYHRICELLSDYK      | 453  | 26 | 6  | 26.44 | b5b6*b6b8y4y12                        | 3241.44 | 77.303  | 4014   | 4 | 811.12  | 1.88   |
| A5A3E0 A26CB_HUMAN ANKRD26-like family C member 1B | 27 |                       | ESGKSNVGTSGDHDDSAMK            | 36   | 19 | 7  | 33.33 | b7b8b12*b12b14*b14y15                 | 1921.82 | 46.185  | 3521   | 2 | 961.41  | 0.13   |
| A5A3E0 A26CB_HUMAN ANKRD26-like family C member 1B | 28 | Carbamidomethyl+C(4)  | EKLCYVALDFEQEMATVASSSSLEK      | 913  | 25 | 6  | 41.49 | b6b7y6y7y13y16                        | 2835.31 | 76.513  | 3288   | 3 | 945.78  | -11.11 |
| A5A3E0 A26CB_HUMAN ANKRD26-like family C member 1B | 29 |                       | RSQEPEINK                      | 518  | 9  | 6  | 44.93 | b5b7y7*y7y8*y8                        | 1100.57 | 26.891  | 2003   | 3 | 367.53  | 2.66   |
| A5A3E0 A26CB_HUMAN ANKRD26-like family C member 1B | 30 | Oxidation+M()         | EIAALAPSMKK                    | 1015 | 11 | 3  | 24.29 | b3y5y9                                | 1177.61 | 50.776  | 70345  | 2 | 589.31  | 12.85  |
| A5A3E0 A26CB_HUMAN ANKRD26-like family C member 1B | 31 | Oxidation+M()         | DGDRELENFMAIEEMK               | 527  | 16 | 5  | 27.65 | b11y8*y8y10y12                        | 1942.87 | 60.183  | 7343   | 2 | 971.94  | 11.37  |
| A5A3E0 A26CB_HUMAN ANKRD26-like family C member 1B | 32 | Oxidation+M()         | QQGMMGGMHQKESYVGK              | 739  | 17 | 3  | 16.3  | b3y6y12                               | 1911.85 | 58.941  | 2386   | 2 | 956.43  | -1.53  |
| A5A3E0 A26CB_HUMAN ANKRD26-like family C member 1B | 33 |                       | ISSENSNPE                      | 367  | 9  | 0  | 3.24  |                                       | 976.43  | 54.325  | 7611   | 2 | 488.72  | 9.94   |
| P08107 HSP71_HUMAN Heat shock 70 kDa protein 1     | 1  |                       | VEIANDQGNR                     | 25   | 11 | 14 | 98.13 | b2b3b10y3y4*y4y6*y6y7y8y10*y10*y10y11 | 1228.62 | 36.699  | 60296  | 2 | 614.82  | -2.68  |
| P08107 HSP71_HUMAN Heat shock 70 kDa protein 1     | 2  |                       | TTPSYVAFTDTER                  | 36   | 13 | 10 | 67.47 | b1b5*b5y3y4*y4y6y9y11y13              | 1487.70 | 55.395  | 55293  | 2 | 744.36  | 1.15   |
| P08107 HSP71_HUMAN Heat shock 70 kDa protein 1     | 3  |                       | SINPDEAVAYGAAVQAAILMGDK        | 361  | 23 | 10 | 37.25 | b1b7b8*b8b13*b13y4y5*y5y23            | 2304.14 | 77.234  | 43675  | 2 | 1152.57 | -5.72  |
| P08107 HSP71_HUMAN Heat shock 70 kDa protein 1     | 4  | Carbamidomethyl+C(1)  | CQEVISWLDANTLAEK               | 573  | 16 | 7  | 27.65 | b2b7*b7b10*b10b12y5                   | 1876.92 | 121.595 | 5280   | 2 | 938.96  | 5.40   |
| P08107 HSP71_HUMAN Heat shock 70 kDa protein 1     | 5  | Carbamidomethyl+C(6)  | ELEQVCNPIISGLYQGAGGPGGGFGAQGPK | 597  | 31 | 4  | 16.17 | b11y14y18y21                          | 3055.50 | 83.558  | 4225   | 3 | 1019.17 | 0.72   |
| P08107 HSP71_HUMAN Heat shock 70 kDa protein 1     | 6  |                       | ATAGDTHLGGEDFDNR               | 220  | 16 | 4  | 17.15 | b6*b6b12y11                           | 1675.71 | 41.886  | 2085   | 3 | 559.24  | -11.36 |
| P08107 HSP71_HUMAN Heat shock 70 kDa protein 1     | 7  | Carbamidomethyl+C(1)  | CQEVISWLDANTLAEKDEFEHK         | 573  | 22 | 4  | 24.21 | b6y8y9y12                             | 2662.24 | 104.969 | 1764   | 3 | 888.08  | -3.48  |
| P08107 HSP71_HUMAN Heat shock 70 kDa protein 1     | 8  |                       | EIAEAYLGYPVTNAVITVPAYFND SQR   | 128  | 27 | 6  | 25.95 | b4b5b12*b12y6y14                      | 3001.45 | 113.289 | 3664   | 4 | 751.12  | -15.29 |
| P08107 HSP71_HUMAN Heat shock 70 kDa protein 1     | 9  |                       | NALESYAFNMK                    | 539  | 11 | 7  | 64.89 | b3b6b7y3y4*y4y5                       | 1287.58 | 99.181  | 2198   | 2 | 644.29  | -19.43 |
| P08107 HSP71_HUMAN Heat shock 70 kDa protein 1     | 10 |                       | ISEADK                         | 561  | 6  | 1  | 13.62 | y3                                    | 662.34  | 43.145  | 2166   | 1 | 662.34  | 11.33  |
| P08107 HSP71_HUMAN Heat shock 70 kDa protein 1     | 11 |                       | HWPFQVINDGDKPK                 | 88   | 14 | 3  | 24.71 | b8y6y7                                | 1680.85 | 63.765  | 1818   | 2 | 840.93  | 1.53   |
| P08107 HSP71_HUMAN Heat shock 70 kDa protein 1     | 12 | Carbamidomethyl+C(17) | MAKAAAIGIDLGTTYSCVGVFQHGK      | 0    | 25 | 3  | 12.4  | b5y10y13                              | 2595.30 | 101.236 | 294084 | 3 | 865.77  | -1.51  |
| P08107 HSP71_HUMAN Heat shock 70 kDa protein 1     | 13 | Carbamidomethyl+C(5)  | VLDKQCQEVISWLDANTLAEK          | 569  | 20 | 3  | 14.36 | b8b13y3                               | 2332.16 | 81.993  | 243004 | 3 | 778.06  | -12.77 |
| P08107 HSP71_HUMAN Heat shock 70 kDa protein 1     | 14 | Phosphoryl STY(12)    | EIAEAYLGYPVTNAVITVPAYFND SQR   | 128  | 27 | 4  | 17.77 | b3b7b12y14                            | 3081.44 | 84.605  | 4852   | 3 | 1027.82 | -4.52  |

|                                                         |    |                                          |                                  |     |    |    |       |                                               |         |         |        |   |         |        |
|---------------------------------------------------------|----|------------------------------------------|----------------------------------|-----|----|----|-------|-----------------------------------------------|---------|---------|--------|---|---------|--------|
| P08107 HSP71_HUMAN Heat shock 70 kDa protein 1          | 15 | Carbamidomethyl+C(7); Phosphoryl STY(12) | KELEQVCNPIISGLYQGAGGPGPG GFGAQGP | 596 | 32 | 5  | 24.52 | b12b13y9y19*y19                               | 3263.55 | 77.318  | 2202   | 4 | 816.64  | 0.37   |
| P08107 HSP71_HUMAN Heat shock 70 kDa protein 1          | 16 | Oxidation+M()                            | NALESYAFNMK                      | 539 | 11 | 7  | 64.89 | b4*b4b6b9y3y4y7                               | 1303.59 | 27.904  | 3580   | 2 | 652.30  | -4.87  |
| P08107 HSP71_HUMAN Heat shock 70 kDa protein 1          | 17 | Oxidation+M(1)                           | MKEIAEAYLGYPVTNAVITVPAYF NDSQR   | 126 | 29 | 5  | 25.97 | b6b8b9b13y12                                  | 3276.63 | 133.676 | 2958   | 3 | 1092.88 | 0.97   |
| P08107 HSP71_HUMAN Heat shock 70 kDa protein 1          | 18 |                                          | ATAGDTHLG                        | 220 | 9  | 1  | 7.25  | y3                                            | 842.40  | 41.965  | 10693  | 1 | 842.40  | 3.48   |
| P08107 HSP71_HUMAN Heat shock 70 kDa protein 1          | 19 | Carbamidomethyl+C(6)                     | ELEQVCNPIISGLYQGAGGPGPG FGAQ     | 597 | 28 | 1  | 9.59  | y17                                           | 2773.29 | 83.518  | 4034   | 3 | 925.10  | -11.80 |
| P62937 PIIA_HUMAN Peptidyl-prolyl cis-trans isomerase A | 1  | Carbamidomethyl+C(7)                     | IIPGFMCQGGDFTR                   | 55  | 14 | 6  | 27.84 | b2y1y6y9y12y14                                | 1598.75 | 71.282  | 96317  | 2 | 799.88  | 4.96   |
| P62937 PIIA_HUMAN Peptidyl-prolyl cis-trans isomerase A | 2  | Carbamidomethyl+C(24)                    | HTGPGILSMANAGPNTNGSQFFIC TAK     | 91  | 27 | 15 | 61.21 | b2b6b15*b15y4y8y10*y10*y10y11y12y14*y14y16y27 | 2791.32 | 76.520  | 68705  | 3 | 931.11  | -2.27  |
| P62937 PIIA_HUMAN Peptidyl-prolyl cis-trans isomerase A | 3  |                                          | VNPTVFFDIAVDGEPLGR               | 1   | 18 | 5  | 24.8  | b8*b8y4y7y11                                  | 1946.02 | 98.343  | 43389  | 2 | 973.51  | 10.66  |
| P62937 PIIA_HUMAN Peptidyl-prolyl cis-trans isomerase A | 4  |                                          | EGMNIVEAMER                      | 133 | 11 | 3  | 31.28 | y6y7y10                                       | 1278.59 | 68.672  | 29707  | 2 | 639.80  | 3.82   |
| P62937 PIIA_HUMAN Peptidyl-prolyl cis-trans isomerase A | 5  |                                          | VKEGMNIVEAMER                    | 131 | 13 | 7  | 20.63 | b10*b10y6*y6y11*y11y13                        | 1505.75 | 60.999  | 13199  | 2 | 753.38  | 3.16   |
| P62937 PIIA_HUMAN Peptidyl-prolyl cis-trans isomerase A | 6  |                                          | FEDENFILK                        | 82  | 9  | 3  | 30.47 | b7y3y7                                        | 1154.57 | 65.957  | 77517  | 2 | 577.79  | -2.85  |
| P62937 PIIA_HUMAN Peptidyl-prolyl cis-trans isomerase A | 7  | Carbamidomethyl+C(7)                     | IIPGFMCQGGDFTRHNGTGGK            | 55  | 21 | 3  | 13.86 | b10b14y3                                      | 2250.06 | 84.964  | 52244  | 2 | 1125.53 | 2.50   |
| P62937 PIIA_HUMAN Peptidyl-prolyl cis-trans isomerase A | 8  |                                          | TAENFRALSTGEK                    | 31  | 13 | 5  | 29.87 | y3*y3y6*y6y11                                 | 1423.71 | 56.152  | 6863   | 2 | 712.36  | -5.83  |
| P62937 PIIA_HUMAN Peptidyl-prolyl cis-trans isomerase A | 9  |                                          | VKEGMNIVEAMER                    | 131 | 13 | 4  | 41.32 | y3y4y6y8                                      | 1505.75 | 101.197 | 4916   | 2 | 753.38  | 3.40   |
| P62937 PIIA_HUMAN Peptidyl-prolyl cis-trans isomerase A | 10 |                                          | MVNPTVFFDIAVDGEPLGRVSFEL FADK    | 0   | 28 | 3  | 21.91 | b6y6y7                                        | 3113.55 | 137.352 | 3948   | 3 | 1038.52 | -4.78  |
| P62937 PIIA_HUMAN Peptidyl-prolyl cis-trans isomerase A | 11 |                                          | ALSTGEKGFQYK                     | 37  | 12 | 3  | 29.46 | y5y7y8                                        | 1257.64 | 28.232  | 2225   | 2 | 629.32  | -5.44  |
| P62937 PIIA_HUMAN Peptidyl-prolyl cis-trans isomerase A | 12 | Phosphoryl STY(4)                        | VNPTVFFDIAVDGEPLGR               | 1   | 18 | 3  | 15.57 | b3y10y13                                      | 2025.95 | 117.339 | 4856   | 3 | 675.99  | -3.19  |
| P62937 PIIA_HUMAN Peptidyl-prolyl cis-trans isomerase A | 13 |                                          | HTGPGILSMANAGPNTNGS              | 91  | 19 | 4  | 36.42 | y4y15y16y17                                   | 1795.85 | 76.471  | 4254   | 2 | 898.43  | 4.96   |
| Q99867 TBB4Q_HUMAN Putative tubulin beta-4q chain       | 1  |                                          | LAVNMVPPFR                       | 252 | 10 | 12 | 99.95 | b2b3b5y1y4y5y6y7*y7y8y9y10                    | 1143.63 | 72.920  | 246238 | 2 | 572.32  | -1.81  |
| Q99867 TBB4Q_HUMAN Putative tubulin beta-4q chain       | 2  |                                          | AVLVDLEPGTMDSVR                  | 62  | 15 | 8  | 29.42 | b1b2b3y2y8y9y11y15                            | 1601.82 | 71.150  | 50258  | 2 | 801.41  | -2.97  |
| Q99867 TBB4Q_HUMAN Putative tubulin beta-4q chain       | 3  |                                          | IREEYPDR                         | 154 | 8  | 6  | 36.08 | b2b4b7y1y3y8                                  | 1077.53 | 25.572  | 26155  | 2 | 539.27  | -3.40  |
| Q99867 TBB4Q_HUMAN Putative tubulin beta-4q chain       | 4  |                                          | LHFFMPGFAPLTSQGSQQYR             | 262 | 20 | 6  | 39.17 | b1b6b7b8b14y15                                | 2312.11 | 100.646 | 5137   | 3 | 771.38  | -7.60  |
| Q99867 TBB4Q_HUMAN Putative tubulin beta-4q chain       | 5  |                                          | VSEQFTATFR                       | 379 | 10 | 4  | 28.65 | b6y4*y4y5                                     | 1185.61 | 64.251  | 142477 | 2 | 593.31  | 15.44  |
| Q99867 TBB4Q_HUMAN Putative tubulin beta-4q chain       | 6  |                                          | MSVTFTGNNTAVQELK                 | 362 | 16 | 3  | 17.15 | b15y3y11                                      | 1739.84 | 84.488  | 35787  | 3 | 580.62  | -11.58 |
| Q99867 TBB4Q_HUMAN Putative tubulin beta-4q chain       | 7  |                                          | FWEVISDEHAIDSAGTYHGDSLQ LER      | 19  | 27 | 5  | 25.66 | b5y7y10y13y19                                 | 3112.49 | 96.086  | 10179  | 3 | 1038.17 | 17.73  |
| Q99867 TBB4Q_HUMAN Putative tubulin beta-4q chain       | 8  | Carbamidomethyl+C(23)                    | LPTPTYGDLNHLVSATVSGVTTCLR        | 216 | 25 | 6  | 35.54 | y6y8*y8y10y13y14                              | 2672.33 | 108.482 | 4775   | 3 | 891.45  | -13.98 |
| Q99867 TBB4Q_HUMAN Putative tubulin beta-4q chain       | 9  | Carbamidomethyl+C(18)                    | SGPFAEVFRPDNFISRQCGAGNNW AK      | 77  | 26 | 4  | 18.27 | b5b11b18y8                                    | 2925.37 | 84.213  | 27997  | 4 | 732.10  | -4.17  |
| Q99867 TBB4Q_HUMAN Putative tubulin beta-4q chain       | 10 | Carbamidomethyl+C(6)                     | DPRHGCYLTAIAIFR                  | 303 | 15 | 3  | 26.21 | b4b13b14                                      | 1747.88 | 87.963  | 3985   | 2 | 874.45  | 8.38   |

|                                    |    |                      |                          |     |    |    |        |                                                                              |         |         |        |   |        |        |
|------------------------------------|----|----------------------|--------------------------|-----|----|----|--------|------------------------------------------------------------------------------|---------|---------|--------|---|--------|--------|
| O43707 ACTN4_HUMAN Alpha-actinin-4 | 1  |                      | VGWEQLLTIAR              | 733 | 12 | 20 | 166.82 | b3b4b5°b5b6*b6b8y1y2y3y4y5y6y7y8y9°y9*y9y11y12                               | 1386.78 | 98.077  | 257871 | 2 | 693.89 | 1.32   |
| O43707 ACTN4_HUMAN Alpha-actinin-4 | 2  |                      | AIMTYVSSFYHAFSGAQK       | 255 | 18 | 28 | 205.87 | b2b3b5°b5b8°b8b13b15y1y2*y2y4y5y6y7y8y9y10°y10y11y12*y12y13y14°y14y16y18*y18 | 2007.95 | 90.556  | 170967 | 3 | 669.99 | -7.11  |
| O43707 ACTN4_HUMAN Alpha-actinin-4 | 3  |                      | TINEVENQILTR             | 745 | 12 | 7  | 49.66  | b3y1y3y4y6y10y12                                                             | 1429.76 | 60.151  | 107053 | 2 | 715.39 | -0.17  |
| O43707 ACTN4_HUMAN Alpha-actinin-4 | 4  |                      | LASDLLEWIR               | 300 | 10 | 5  | 33.88  | y2y3y4y8y10                                                                  | 1215.66 | 92.134  | 104666 | 2 | 608.34 | -7.93  |
| O43707 ACTN4_HUMAN Alpha-actinin-4 | 5  |                      | ALDFIASK                 | 114 | 8  | 5  | 33.07  | b3b4y2y5y8                                                                   | 864.48  | 55.593  | 64485  | 2 | 432.74 | -6.50  |
| O43707 ACTN4_HUMAN Alpha-actinin-4 | 6  | Carbamidomethyl+C(1) | CQLEINFNTLQTK            | 350 | 13 | 6  | 25.4   | b2°b2b3y9y10y13                                                              | 1608.81 | 70.416  | 48869  | 2 | 804.91 | 3.72   |
| O43707 ACTN4_HUMAN Alpha-actinin-4 | 7  |                      | VEQIAAIAQELNELDYDShNVNTR | 469 | 25 | 12 | 50.32  | b3b4°b4b6y3y4y6y9*y9y12*y12y25                                               | 2905.40 | 89.731  | 31484  | 3 | 969.14 | 0.08   |
| O43707 ACTN4_HUMAN Alpha-actinin-4 | 8  |                      | LSGSNPYTTVTPQIINSK       | 604 | 18 | 5  | 22.73  | b4b6b11°b11y18                                                               | 1919.98 | 103.972 | 21869  | 2 | 960.50 | -12.27 |
| O43707 ACTN4_HUMAN Alpha-actinin-4 | 9  |                      | MVSDINNGWQHLEQAEK        | 378 | 17 | 4  | 16.3   | b3b7y12y17                                                                   | 1998.91 | 59.790  | 12049  | 3 | 666.98 | -9.65  |
| O43707 ACTN4_HUMAN Alpha-actinin-4 | 10 |                      | MAPYQGPDAVPGALDYK        | 882 | 17 | 4  | 36.71  | b7b9b13b16                                                                   | 1792.86 | 62.489  | 11431  | 2 | 896.93 | 2.45   |
| O43707 ACTN4_HUMAN Alpha-actinin-4 | 11 |                      | ASIHEAWTDGK              | 421 | 11 | 5  | 24.29  | b5°b5b8°b8y5                                                                 | 1214.58 | 27.787  | 5674   | 2 | 607.79 | -0.90  |
| O43707 ACTN4_HUMAN Alpha-actinin-4 | 12 |                      | IMSLVDPNHSGLVTFQAFIDFMSR | 813 | 24 | 8  | 23.59  | b2b11b14b16y1y9*y9y13                                                        | 2725.35 | 119.405 | 4614   | 3 | 909.12 | -0.81  |
| O43707 ACTN4_HUMAN Alpha-actinin-4 | 13 |                      | HEAFESDLAAHQDR           | 455 | 14 | 3  | 19.27  | b8b10y8                                                                      | 1625.72 | 37.132  | 31838  | 3 | 542.58 | -6.61  |
| O43707 ACTN4_HUMAN Alpha-actinin-4 | 14 |                      | YLDIPK                   | 233 | 6  | 3  | 40.04  | b3y4y5                                                                       | 748.41  | 49.278  | 30837  | 2 | 374.71 | -12.89 |
| O43707 ACTN4_HUMAN Alpha-actinin-4 | 15 |                      | ISIEMNGTLEDQLSHLK        | 674 | 17 | 3  | 24.96  | y12y13y16                                                                    | 1928.02 | 67.065  | 19257  | 3 | 643.34 | 19.82  |
| O43707 ACTN4_HUMAN Alpha-actinin-4 | 16 |                      | EALEK                    | 513 | 5  | 2  | 26.43  | b3b4                                                                         | 589.31  | 38.456  | 18206  | 1 | 589.31 | -11.29 |
| O43707 ACTN4_HUMAN Alpha-actinin-4 | 17 |                      | QLEAIDLHLEYAK            | 521 | 14 | 5  | 24.71  | b3°b3°b3b4y4                                                                 | 1670.84 | 68.190  | 6072   | 4 | 418.47 | -19.58 |
| O43707 ACTN4_HUMAN Alpha-actinin-4 | 18 |                      | LEDFR                    | 331 | 5  | 1  | 13.21  | b3                                                                           | 679.35  | 56.909  | 4964   | 1 | 679.35 | 12.13  |
| O43707 ACTN4_HUMAN Alpha-actinin-4 | 19 | Carbamidomethyl+C(2) | ICDQWDALGSLTHSR          | 497 | 15 | 3  | 18.12  | b13y6y13                                                                     | 1758.79 | 84.290  | 4087   | 3 | 586.93 | -21.52 |
| O43707 ACTN4_HUMAN Alpha-actinin-4 | 20 |                      | MLDAEDIVNTARPDEK         | 239 | 16 | 7  | 44.95  | b9b11°b11y5y6y8y13                                                           | 1816.89 | 62.207  | 3933   | 2 | 908.95 | 6.52   |
| O43707 ACTN4_HUMAN Alpha-actinin-4 | 21 |                      | DDPVTNLNNAFEVAEK         | 217 | 16 | 5  | 24.24  | b4b13°b13y4y12                                                               | 1775.85 | 54.728  | 2890   | 2 | 888.43 | 2.61   |
| O43707 ACTN4_HUMAN Alpha-actinin-4 | 22 |                      | SFSTALYGESDL             | 899 | 12 | 3  | 26.24  | b10y7y8                                                                      | 1289.58 | 32.021  | 2823   | 2 | 645.30 | -5.30  |
| O43707 ACTN4_HUMAN Alpha-actinin-4 | 23 |                      | DHALLEEQSK               | 633 | 10 | 4  | 33.88  | b5b8°b8b9                                                                    | 1169.60 | 38.301  | 2739   | 2 | 585.30 | 16.07  |
| O43707 ACTN4_HUMAN Alpha-actinin-4 | 24 |                      | HTNYTMEHIR               | 723 | 10 | 3  | 26.89  | b9y5y8                                                                       | 1301.61 | 32.049  | 2515   | 2 | 651.31 | 6.75   |
| O43707 ACTN4_HUMAN Alpha-actinin-4 | 25 | Carbamidomethyl+C(2) | ACLISLGYDVENDR           | 791 | 14 | 6  | 31.51  | b4y6y10y12°y12*y12                                                           | 1624.77 | 63.012  | 2442   | 4 | 406.95 | 2.48   |
| O43707 ACTN4_HUMAN Alpha-actinin-4 | 26 |                      | AETAANR                  | 273 | 7  | 4  | 37.44  | b3b4°b4y4                                                                    | 732.36  | 83.106  | 2324   | 1 | 732.36 | -3.92  |
| O43707 ACTN4_HUMAN Alpha-actinin-4 | 27 |                      | AGTQIENIDEDFR            | 66  | 13 | 6  | 20.63  | b9°b9y4°y4y11°y11                                                            | 1507.73 | 45.159  | 2142   | 2 | 754.37 | 19.59  |

|                                                 |    |                                             |                                  |     |    |    |       |                                       |         |         |        |   |         |        |
|-------------------------------------------------|----|---------------------------------------------|----------------------------------|-----|----|----|-------|---------------------------------------|---------|---------|--------|---|---------|--------|
| O43707 ACTN4_HUMAN Alpha-actinin-4              | 28 | Carbamidomethyl+C(2)                        | ACLISLGYDVENDRQGEAEFNR           | 791 | 22 | 3  | 13.43 | b3y12y17                              | 2556.19 | 57.171  | 264748 | 3 | 852.73  | 3.72   |
| O43707 ACTN4_HUMAN Alpha-actinin-4              | 29 |                                             | DHALLEEQSKQSSNEHLR               | 633 | 18 | 4  | 21.72 | b13b16y6y15                           | 2162.08 | 63.638  | 122527 | 3 | 721.36  | 7.79   |
| O43707 ACTN4_HUMAN Alpha-actinin-4              | 30 |                                             | KDDPVNTLNNAFEVAEK                | 216 | 17 | 4  | 26.13 | b3b6b14y3                             | 1903.91 | 71.232  | 31494  | 3 | 635.31  | -13.98 |
| O43707 ACTN4_HUMAN Alpha-actinin-4              | 31 |                                             | ASIHEAWTDGKEAMLK                 | 421 | 16 | 3  | 17.15 | b7b12y15                              | 1786.87 | 71.086  | 18919  | 3 | 596.29  | -5.94  |
| O43707 ACTN4_HUMAN Alpha-actinin-4              | 32 |                                             | DAKGISQEQMQEFR                   | 757 | 14 | 6  | 19.27 | b8°b8b10°b10°b10y9                    | 1666.80 | 44.178  | 6487   | 4 | 417.46  | 9.67   |
| O43707 ACTN4_HUMAN Alpha-actinin-4              | 33 | Carbamidomethyl+C(2)                        | ICKVLAVNQENEHLMEDYEK             | 280 | 20 | 3  | 23.78 | y3y7y8                                | 2462.15 | 121.580 | 4095   | 3 | 821.39  | -7.44  |
| O43707 ACTN4_HUMAN Alpha-actinin-4              | 34 | Phosphoryl STY(10)                          | NVNVQNFHISWK                     | 181 | 12 | 4  | 35.48 | b9°b9b10b11                           | 1565.73 | 54.648  | 23184  | 2 | 783.37  | 9.36   |
| O43707 ACTN4_HUMAN Alpha-actinin-4              | 35 | Phosphoryl STY(1)                           | SFSTALYGESDL                     | 899 | 12 | 4  | 26.24 | b4y10y11°y11                          | 1369.57 | 32.081  | 2019   | 2 | 685.29  | 14.53  |
| O43707 ACTN4_HUMAN Alpha-actinin-4              | 36 | Oxidation+M(8)                              | LSNRPAFMPSEGG                    | 365 | 13 | 9  | 45.5  | b3°b3°b3b8b10b11°b11y11°y11           | 1449.72 | 60.254  | 29489  | 3 | 483.91  | 3.28   |
| O43707 ACTN4_HUMAN Alpha-actinin-4              | 37 |                                             | MAPPYQGPDAVPGALDYK               | 882 | 17 | 0  | 4.86  |                                       | 1775.85 | 62.498  | 11828  | 3 | 592.62  | 13.47  |
| P14649 MYL6B_HUMAN Myosin light chain 6B        | 1  |                                             | ALGQNPTNAEVLK                    | 94  | 13 | 14 | 98.35 | b2b3b4b5°b5b11°b11y1y5y7y8y9y11y13    | 1354.73 | 45.357  | 139460 | 2 | 677.87  | -1.89  |
| P14649 MYL6B_HUMAN Myosin light chain 6B        | 2  | Carbamidomethyl+C(6)                        | ILYSQCGDVMR                      | 83  | 11 | 12 | 65.48 | b2y2y3y6y7°y7y8°y8y9°y9y11°y11        | 1341.63 | 48.940  | 94219  | 2 | 671.32  | 2.46   |
| P14649 MYL6B_HUMAN Myosin light chain 6B        | 3  |                                             | AEPAVPQAPQK                      | 35  | 11 | 5  | 41.48 | b3°b3b4b5y5                           | 1135.59 | 35.838  | 24351  | 2 | 568.30  | -17.52 |
| P14649 MYL6B_HUMAN Myosin light chain 6B        | 4  |                                             | VDFETFLPMLQAVAK                  | 121 | 15 | 7  | 40.67 | b3°b3b8°b8b9b10°b10                   | 1708.89 | 46.137  | 9823   | 3 | 570.30  | -6.36  |
| P14649 MYL6B_HUMAN Myosin light chain 6B        | 5  | Carbamidomethyl+C(19)                       | MTEEEVETVLGHEDSNGCINYE AFLK      | 176 | 27 | 3  | 17.98 | y5y7y14                               | 3085.44 | 95.624  | 5916   | 4 | 772.11  | 19.54  |
| P14649 MYL6B_HUMAN Myosin light chain 6B        | 6  |                                             | SDELK                            | 113 | 5  | 1  | 13.21 | b4                                    | 591.30  | 27.169  | 4450   | 1 | 591.30  | -5.88  |
| P14649 MYL6B_HUMAN Myosin light chain 6B        | 7  | Phosphoryl STY(9)                           | TQEPPVDLSK                       | 46  | 10 | 8  | 58.09 | b5°b5b6°b6b7b9°b9y3_H3PO4 y3          | 1193.53 | 41.116  | 4553   | 3 | 398.52  | -1.33  |
| P34931 HS71L_HUMAN Heat shock 70 kDa protein 1L | 1  |                                             | VEIANDQGNR                       | 27  | 11 | 14 | 98.13 | b2b3b10y3y4°y4y6°y6y7y8y10°y10°y10y11 | 1228.62 | 36.699  | 60296  | 2 | 614.82  | -2.68  |
| P34931 HS71L_HUMAN Heat shock 70 kDa protein 1L | 2  |                                             | TTPSYVAFTDTER                    | 38  | 13 | 10 | 67.47 | b1b5°b5y3y4°y4y6y9y1ly13              | 1487.70 | 55.395  | 55293  | 2 | 744.36  | 1.15   |
| P34931 HS71L_HUMAN Heat shock 70 kDa protein 1L | 3  |                                             | SINPDEAVAYGAAVQAAILMGDK          | 363 | 23 | 10 | 37.25 | b1b7b8°b8b13°b13y4y5°y5y23            | 2304.14 | 77.234  | 43675  | 2 | 1152.57 | -5.72  |
| P34931 HS71L_HUMAN Heat shock 70 kDa protein 1L | 4  | Carbamidomethyl+C(7)                        | KELEQMCNPIITK                    | 598 | 13 | 3  | 20.63 | b6y8y12                               | 1603.84 | 55.287  | 12836  | 3 | 535.28  | 11.04  |
| P34931 HS71L_HUMAN Heat shock 70 kDa protein 1L | 5  |                                             | NQVAMNPQNTVFDK                   | 58  | 15 | 3  | 18.12 | b12y6y12                              | 1676.80 | 71.294  | 2252   | 3 | 559.60  | -4.95  |
| P34931 HS71L_HUMAN Heat shock 70 kDa protein 1L | 6  |                                             | ATAGDTHLGGEDFDNR                 | 222 | 16 | 4  | 17.15 | b6°b6b12y11                           | 1675.71 | 41.886  | 2085   | 3 | 559.24  | -11.36 |
| P34931 HS71L_HUMAN Heat shock 70 kDa protein 1L | 7  | Carbamidomethyl+C(6); Carbamidomethyl+C(11) | LYQGGCTGPACGTGYVGRPATG PTIEEVD   | 611 | 30 | 3  | 17.28 | y4y7y15                               | 3080.44 | 111.116 | 31192  | 4 | 770.87  | 11.10  |
| P34931 HS71L_HUMAN Heat shock 70 kDa protein 1L | 8  |                                             | ISESDK                           | 563 | 6  | 1  | 13.62 | y3                                    | 678.33  | 31.321  | 6321   | 1 | 678.33  | 1.26   |
| P34931 HS71L_HUMAN Heat shock 70 kDa protein 1L | 9  |                                             | ETAFAFLGHVPVNAVITVPAYFND SQR     | 130 | 27 | 4  | 25.88 | b3b5b12b14                            | 2947.50 | 105.848 | 5347   | 3 | 983.17  | 13.92  |
| P34931 HS71L_HUMAN Heat shock 70 kDa protein 1L | 10 |                                             | ETAFAFLGHVPVNAVITVPAYFND SQRQATK | 130 | 31 | 5  | 22.97 | b9y10y13y15y30                        | 3375.66 | 86.626  | 14684  | 5 | 675.94  | -11.57 |
| P34931 HS71L_HUMAN Heat shock 70 kDa protein 1L | 11 |                                             | GENKAFYPEEISSMVLTK               | 110 | 18 | 5  | 24.8  | b5b9b13y14°y14                        | 2042.98 | 79.138  | 12180  | 3 | 681.67  | -14.64 |

|                                                        |    |                      |                              |     |    |    |        |                                                            |         |         |        |   |         |        |
|--------------------------------------------------------|----|----------------------|------------------------------|-----|----|----|--------|------------------------------------------------------------|---------|---------|--------|---|---------|--------|
| P34931 HS71L_HUMAN Heat shock 70 kDa protein 1L        | 12 |                      | SINPDEAVAYGAAVQAAILMGDK SEK  | 363 | 26 | 3  | 12.13  | b3b14y5                                                    | 2648.32 | 56.093  | 7899   | 4 | 662.84  | -0.09  |
| P34931 HS71L_HUMAN Heat shock 70 kDa protein 1L        | 13 |                      | TTPSYVAFTDTERLIGDAAK         | 38  | 20 | 4  | 22.6   | b7b12b14y11                                                | 2156.08 | 91.331  | 6493   | 3 | 719.37  | -2.72  |
| P34931 HS71L_HUMAN Heat shock 70 kDa protein 1L        | 14 |                      | YKAEDEVQR                    | 526 | 9  | 3  | 38.25  | y4y5y7                                                     | 1137.54 | 21.970  | 1818   | 2 | 569.28  | -9.34  |
| P30041 PRDX6_HUMAN Peroxiredoxin-6                     | 1  | Carbamidomethyl+C(6) | DFTPVCTTELGR                 | 41  | 12 | 6  | 26.24  | b2b3y8*y8y9y12                                             | 1395.66 | 57.615  | 40431  | 2 | 698.33  | 0.44   |
| P30041 PRDX6_HUMAN Peroxiredoxin-6                     | 2  |                      | ELAILLGLMDPAEKDEK            | 108 | 17 | 6  | 33.7   | b2y4y7*y7y8y11                                             | 1884.97 | 94.754  | 13964  | 3 | 629.00  | -13.41 |
| P30041 PRDX6_HUMAN Peroxiredoxin-6                     | 3  |                      | LIALSIDSVEDHLAWSK            | 67  | 17 | 3  | 16.3   | b3y3y11                                                    | 1896.99 | 86.173  | 27297  | 3 | 633.00  | -7.01  |
| P30041 PRDX6_HUMAN Peroxiredoxin-6                     | 4  |                      | DGDSVMVLPTIPEEEAK            | 182 | 17 | 3  | 16.3   | b9y5y12                                                    | 1829.87 | 107.076 | 6771   | 3 | 610.63  | -9.54  |
| P30041 PRDX6_HUMAN Peroxiredoxin-6                     | 5  |                      | VATPVDWKDGDSVMVLPTIPEEE AK   | 174 | 25 | 3  | 12.4   | b15y9y15                                                   | 2726.32 | 77.735  | 208584 | 3 | 909.45  | -14.33 |
| P09972 ALDOC_HUMAN Fructose-bisphosphate aldolase C    | 1  | Carbamidomethyl+C(5) | YASICQQNGIVPIVEPEILPDGDHDLKR | 173 | 28 | 21 | 120.29 | b2b9b10*b10b11*b11b12y1y2y3y5y7y8y9y10y13*y13y14*y14y17y28 | 3176.58 | 76.432  | 113156 | 4 | 794.90  | -6.76  |
| P09972 ALDOC_HUMAN Fructose-bisphosphate aldolase C    | 2  | Carbamidomethyl+C(1) | CIGGVIFFHETLYQK              | 72  | 15 | 4  | 26.21  | b3b10b12y15                                                | 1811.94 | 106.830 | 17917  | 2 | 906.47  | 13.61  |
| P09972 ALDOC_HUMAN Fructose-bisphosphate aldolase C    | 3  |                      | TPSALAILENANVLAR             | 157 | 16 | 4  | 17.15  | b10*b10b12y8                                               | 1652.94 | 68.374  | 11614  | 3 | 551.65  | 5.69   |
| P09972 ALDOC_HUMAN Fructose-bisphosphate aldolase C    | 4  |                      | PHSYPALSAEQK                 | 1   | 12 | 5  | 36.14  | b10b11*b11y5y9                                             | 1327.65 | 53.570  | 7871   | 2 | 664.33  | -10.94 |
| P09972 ALDOC_HUMAN Fructose-bisphosphate aldolase C    | 5  |                      | GVVPLAGTDGETTTQGLDGLSER      | 111 | 23 | 6  | 28.22  | b9b19y10y14*y14y15                                         | 2273.11 | 122.380 | 3437   | 3 | 758.38  | -5.05  |
| P09972 ALDOC_HUMAN Fructose-bisphosphate aldolase C    | 6  |                      | GILAADES VGSM AK             | 28  | 14 | 5  | 27.55  | b6b11*b11y4y6                                              | 1348.65 | 38.912  | 2940   | 2 | 674.83  | -18.01 |
| P09972 ALDOC_HUMAN Fructose-bisphosphate aldolase C    | 7  |                      | DNAGAATEEFIKR                | 318 | 13 | 3  | 20.63  | b5b12y12                                                   | 1421.69 | 87.384  | 209251 | 2 | 711.35  | -11.42 |
| P09972 ALDOC_HUMAN Fructose-bisphosphate aldolase C    | 8  |                      | GILAADES VGSM AKR            | 28  | 15 | 8  | 37.07  | b9*b9b13*b13y10y11y14*y14                                  | 1504.77 | 68.197  | 8556   | 2 | 752.89  | -6.57  |
| P09972 ALDOC_HUMAN Fructose-bisphosphate aldolase C    | 9  | Phosphoryl STY(12)   | GVVPLAGTDGETTTQGLDGLSER      | 111 | 23 | 12 | 75.61  | b3b4b10b11y3y4*y4y8*y8y10y11*y11                           | 2353.09 | 136.415 | 2599   | 2 | 1177.05 | 2.59   |
| P09972 ALDOC_HUMAN Fructose-bisphosphate aldolase C    | 10 | Oxidation+M(8)       | YTPEEIAMATVTALR              | 243 | 15 | 6  | 37.07  | b3*b3b6b13y8y13                                            | 1681.87 | 86.031  | 51922  | 3 | 561.29  | 11.90  |
| P54652 HSP72_HUMAN Heat shock-related 70 kDa protein 2 | 1  |                      | NQVAMNPTNTIFDAKR             | 57  | 16 | 5  | 23.68  | b3y4y5y16*y16                                              | 1819.94 | 66.961  | 88940  | 3 | 607.32  | 12.81  |
| P54652 HSP72_HUMAN Heat shock-related 70 kDa protein 2 | 2  |                      | IINEPTAAAIYGLDKK             | 172 | 17 | 7  | 33.7   | b2y2y5y7y13y14y17                                          | 1787.97 | 65.144  | 62949  | 3 | 596.66  | -10.45 |
| P54652 HSP72_HUMAN Heat shock-related 70 kDa protein 2 | 3  |                      | VEIILANDQGNR                 | 26  | 11 | 14 | 98.13  | b2b3b10y3y4*y4y6*y6y7y8y10*y10*y10y11                      | 1228.62 | 36.699  | 60296  | 2 | 614.82  | -2.68  |
| P54652 HSP72_HUMAN Heat shock-related 70 kDa protein 2 | 4  |                      | TTPSYVAFTDTER                | 37  | 13 | 10 | 67.47  | b1b5*b5y3y4*y4y6y9y11y13                                   | 1487.70 | 55.395  | 55293  | 2 | 744.36  | 1.15   |
| P54652 HSP72_HUMAN Heat shock-related 70 kDa protein 2 | 5  |                      | LLQDFFN GK                   | 351 | 9  | 7  | 44.93  | b2b5b6*b8y3y4*y4                                           | 1081.56 | 71.308  | 41350  | 2 | 541.28  | -7.79  |
| P54652 HSP72_HUMAN Heat shock-related 70 kDa protein 2 | 6  |                      | STAGDTHLGGEDFDNR             | 223 | 16 | 6  | 34.55  | b2*b2y8y9y10y16                                            | 1691.71 | 38.908  | 23637  | 3 | 564.58  | -6.93  |
| P54652 HSP72_HUMAN Heat shock-related 70 kDa protein 2 | 7  |                      | EIAEAYLGGK                   | 129 | 10 | 8  | 39.31  | b2b6*b6b9*b9y3y7*y7                                        | 1050.55 | 69.680  | 8508   | 2 | 525.78  | 5.00   |
| P54652 HSP72_HUMAN Heat shock-related 70 kDa protein 2 | 8  |                      | TLSSSTQASIEIDSLYEGVDFYTSITR  | 275 | 27 | 3  | 17.98  | y8y14y16                                                   | 2983.43 | 77.027  | 13584  | 3 | 995.15  | -2.37  |
| P54652 HSP72_HUMAN Heat shock-related 70 kDa protein 2 | 9  | Carbamidomethyl+C(1) | CQEVINWLDR                   | 576 | 10 | 4  | 26.89  | b3b7*b7y4                                                  | 1332.63 | 28.795  | 2897   | 2 | 666.82  | -2.29  |
| P54652 HSP72_HUMAN Heat shock-related 70 kDa protein 2 | 10 |                      | HWPFR                        | 89  | 5  | 1  | 13.21  | b3                                                         | 742.38  | 69.602  | 2649   | 1 | 742.38  | 3.45   |

|                                                        |    |                       |                                                   |     |    |    |        |                                           |         |         |        |   |         |        |
|--------------------------------------------------------|----|-----------------------|---------------------------------------------------|-----|----|----|--------|-------------------------------------------|---------|---------|--------|---|---------|--------|
| P54652 HSP72_HUMAN Heat shock-related 70 kDa protein 2 | 11 |                       | NQVAMNPTNTIFDAK                                   | 57  | 15 | 3  | 18.12  | b6b12y13                                  | 1663.78 | 71.142  | 2474   | 3 | 555.26  | -19.52 |
| P54652 HSP72_HUMAN Heat shock-related 70 kDa protein 2 | 12 |                       | VQVEYK                                            | 103 | 6  | 1  | 13.62  | y3                                        | 765.41  | 106.447 | 2400   | 1 | 765.41  | -0.16  |
| P54652 HSP72_HUMAN Heat shock-related 70 kDa protein 2 | 13 |                       | LYQGGPGGGSGGGSGASGGPTI<br>EEVD                    | 612 | 27 | 3  | 11.9   | b15y9y21                                  | 2320.01 | 65.118  | 1677   | 2 | 1160.51 | -9.68  |
| P54652 HSP72_HUMAN Heat shock-related 70 kDa protein 2 | 14 |                       | RTLSSSTQASIEIDSLYEGVDFYTSI<br>TR                  | 274 | 28 | 5  | 22.31  | b9°b9y12y13y18                            | 3139.50 | 110.909 | 23646  | 4 | 785.63  | -14.39 |
| P54652 HSP72_HUMAN Heat shock-related 70 kDa protein 2 | 15 |                       | FEELNADLFRGTLEPVEK                                | 304 | 18 | 4  | 22.73  | b6b8b13*b13                               | 2107.10 | 96.054  | 13316  | 2 | 1054.05 | 13.90  |
| P54652 HSP72_HUMAN Heat shock-related 70 kDa protein 2 | 16 |                       | FEDATVQSDMKHWPFR                                  | 78  | 16 | 4  | 25.52  | y8y9y14*y14                               | 1993.91 | 80.165  | 11928  | 3 | 665.31  | -6.55  |
| P54652 HSP72_HUMAN Heat shock-related 70 kDa protein 2 | 17 | Carbamidomethyl+C(18) | MSARGPAIGIDLGGTYSCVGVFQH<br>GK                    | 0   | 26 | 4  | 12.13  | b4°b4b9y8                                 | 2722.32 | 76.348  | 4053   | 3 | 908.11  | -8.43  |
| P54652 HSP72_HUMAN Heat shock-related 70 kDa protein 2 | 18 | Carbamidomethyl+C(2)  | VCNPIISKLYQGGPGGGSGGGGSG<br>ASGGPTIEEVD           | 604 | 35 | 3  | 37.31  | y17y18y19                                 | 3231.50 | 83.000  | 3897   | 3 | 1077.84 | -6.80  |
| P54652 HSP72_HUMAN Heat shock-related 70 kDa protein 2 | 19 |                       | NQVAMNPTNTIFDAKR                                  | 57  | 16 | 3  | 25.52  | b7b12b13                                  | 1819.90 | 91.461  | 2587   | 2 | 910.45  | -6.37  |
| P54652 HSP72_HUMAN Heat shock-related 70 kDa protein 2 | 20 |                       | GVPQIEVTFDIDANGILNVTAAADK<br>STGK                 | 472 | 28 | 5  | 20.5   | b5b10b13y4y6                              | 2873.46 | 113.336 | 2451   | 3 | 958.49  | -10.37 |
| P54652 HSP72_HUMAN Heat shock-related 70 kDa protein 2 | 21 | Phosphoryl STY(6)     | EIAEAYLGGK                                        | 129 | 10 | 4  | 26.89  | b5y5_H3PO4 y5y9°y9                        | 1130.51 | 80.254  | 6554   | 1 | 1130.51 | 9.61   |
| P54652 HSP72_HUMAN Heat shock-related 70 kDa protein 2 | 22 |                       | EPTAAAIA YGLDKK                                   | 175 | 14 | 1  | 7.28   | b9                                        | 1447.76 | 65.088  | 123160 | 2 | 724.38  | -14.00 |
| P00338 LDHA_HUMAN L-lactate dehydrogenase A chain      | 1  | Carbamidomethyl+C(6)  | VIGSGCNLDSAR                                      | 157 | 12 | 11 | 108.54 | b2y1y3y5y6y7y8y9y10y<br>11y12             | 1248.60 | 36.173  | 68481  | 2 | 624.80  | -0.49  |
| P00338 LDHA_HUMAN L-lactate dehydrogenase A chain      | 2  |                       | LLIVSNPVDILTYVAWK                                 | 132 | 17 | 9  | 64.68  | b2b3b4y3y6y11y12y13y<br>17                | 1944.13 | 115.901 | 42956  | 2 | 972.57  | 5.40   |
| P00338 LDHA_HUMAN L-lactate dehydrogenase A chain      | 3  |                       | FIPNVVK                                           | 118 | 8  | 4  | 33.07  | b2b6y5y6                                  | 929.58  | 69.800  | 22155  | 2 | 465.29  | -5.65  |
| P00338 LDHA_HUMAN L-lactate dehydrogenase A chain      | 4  | Carbamidomethyl+C(15) | GLYGIKDDVFLSVPCLGQNGISDL<br>VK                    | 278 | 27 | 5  | 17.77  | b9y2y8y10y14                              | 2920.55 | 104.926 | 19968  | 3 | 974.19  | 0.17   |
| P00338 LDHA_HUMAN L-lactate dehydrogenase A chain      | 5  |                       | DYNVTANSK                                         | 81  | 9  | 6  | 59.9   | b7b8y4y7y8*y8                             | 1011.46 | 30.526  | 89095  | 2 | 506.24  | -9.47  |
| P00338 LDHA_HUMAN L-lactate dehydrogenase A chain      | 6  |                       | LNLVQR                                            | 106 | 6  | 4  | 53.26  | b3y3y4y5                                  | 742.45  | 39.144  | 14545  | 2 | 371.73  | -12.08 |
| P00338 LDHA_HUMAN L-lactate dehydrogenase A chain      | 7  |                       | ISGFPK                                            | 149 | 6  | 1  | 13.62  | y5                                        | 648.38  | 32.529  | 10554  | 2 | 324.69  | 6.02   |
| P00338 LDHA_HUMAN L-lactate dehydrogenase A chain      | 8  |                       | GEMMDLQHGSFLFR                                    | 59  | 14 | 3  | 27.05  | y8y10y11                                  | 1633.81 | 136.672 | 10202  | 1 | 1633.81 | 19.20  |
| P00338 LDHA_HUMAN L-lactate dehydrogenase A chain      | 9  |                       | QVVESAYEVIK                                       | 232 | 11 | 4  | 36.05  | b4b8*b8b10                                | 1264.70 | 98.255  | 2589   | 3 | 422.24  | 17.08  |
| P00338 LDHA_HUMAN L-lactate dehydrogenase A chain      | 10 |                       | NVNIFK                                            | 112 | 6  | 1  | 13.62  | b3                                        | 734.43  | 67.347  | 1755   | 2 | 367.72  | 12.47  |
| P00338 LDHA_HUMAN L-lactate dehydrogenase A chain      | 11 | Carbamidomethyl+C(8)  | LGVHPLSCHGWVLGEHGDSSVPV<br>WSGMNVAGVSLKTLHPDLGTDK | 177 | 45 | 13 | 33.75  | b3b8°b8b10°b10b14b23<br>b27y3°y3y6y10°y10 | 4746.30 | 116.655 | 8136   | 5 | 950.07  | -11.52 |
| P00338 LDHA_HUMAN L-lactate dehydrogenase A chain      | 12 |                       | LKGEMMDLQHGSFLFR                                  | 57  | 16 | 4  | 17.15  | b9b14y13*y13                              | 1874.96 | 93.344  | 6202   | 3 | 625.66  | 1.04   |
| P00338 LDHA_HUMAN L-lactate dehydrogenase A chain      | 13 | Carbamidomethyl+C(9)  | DDVFLSVPCLGQNGISDLVKVTL<br>TSEEEAR                | 284 | 31 | 6  | 24.63  | b9b12°b12y9y10°y10                        | 3404.69 | 127.273 | 3042   | 4 | 851.93  | -10.97 |
| P00338 LDHA_HUMAN L-lactate dehydrogenase A chain      | 14 | Phosphoryl STY()      | SADTLWGIQK                                        | 318 | 10 | 4  | 33.88  | y5y8°y8y9                                 | 1198.55 | 27.851  | 3591   | 3 | 400.19  | 9.06   |
| P00338 LDHA_HUMAN L-lactate dehydrogenase A chain      | 15 | Phosphoryl STY(7)     | QVVESAYEVIK                                       | 232 | 11 | 3  | 24.29  | b5b10y6_H3PO4 y6                          | 1344.65 | 62.981  | 2285   | 2 | 672.83  | 14.71  |
| P00924 ENO1_YEAST Enolase 1                            | 1  |                       | VNQGITLSESIK                                      | 346 | 12 | 6  | 44.89  | b2y3y5y8y9y12                             | 1288.71 | 54.220  | 68443  | 2 | 644.86  | -3.22  |
| P00924 ENO1_YEAST Enolase 1                            | 2  |                       | TFAEALR                                           | 178 | 7  | 7  | 53.66  | b2°b2b4b5y3y4y7                           | 807.43  | 45.242  | 65403  | 2 | 404.22  | -9.07  |
| P00924 ENO1_YEAST Enolase 1                            | 3  |                       | IEEELGDNAVAFAGENFHHGDK                            | 415 | 21 | 5  | 29.73  | b3b4b8y8y11                               | 2328.03 | 57.362  | 40162  | 4 | 582.76  | -10.07 |
| P00924 ENO1_YEAST Enolase 1                            | 4  |                       | IATAIEK                                           | 330 | 7  | 4  | 40.45  | y4y5y6y7                                  | 745.44  | 28.032  | 16791  | 2 | 373.22  | -12.53 |

|                              |    |                      |                                        |      |    |    |        |                                                                      |         |         |        |   |         |        |
|------------------------------|----|----------------------|----------------------------------------|------|----|----|--------|----------------------------------------------------------------------|---------|---------|--------|---|---------|--------|
| P00924 ENO1_YEAST Enolase 1  | 5  |                      | YGASAGNVGDEGGVAPNIQTAE<br>ALDLIVDAIK   | 201  | 33 | 4  | 11.05  | b3b5y4°y4                                                            | 3257.62 | 86.047  | 7525   | 3 | 1086.54 | -0.15  |
| P00924 ENO1_YEAST Enolase 1  | 6  |                      | IGSEVYHNLK                             | 185  | 10 | 10 | 81.3   | y3y4*y4y5*y5y6y7*y7y9°y9                                             | 1159.59 | 37.441  | 95884  | 3 | 387.20  | -15.05 |
| P00924 ENO1_YEAST Enolase 1  | 7  |                      | SIVPSGASTGVHEALEMR                     | 32   | 18 | 7  | 60.38  | b7y5y6y11y13y15y16                                                   | 1840.90 | 61.004  | 77824  | 3 | 614.31  | -9.55  |
| P00924 ENO1_YEAST Enolase 1  | 8  |                      | AADALLK                                | 338  | 8  | 7  | 93.71  | b3b5y3y4y5y6y7                                                       | 814.49  | 52.908  | 75922  | 2 | 407.75  | -15.59 |
| P00924 ENO1_YEAST Enolase 1  | 9  |                      | YDLDFK                                 | 258  | 6  | 3  | 40.04  | y3y4y5                                                               | 800.37  | 54.620  | 59784  | 2 | 400.69  | -12.89 |
| P00924 ENO1_YEAST Enolase 1  | 10 |                      | LNQLLR                                 | 409  | 6  | 3  | 26.83  | y4y5*y5                                                              | 756.46  | 42.026  | 33078  | 2 | 378.73  | -13.39 |
| P00924 ENO1_YEAST Enolase 1  | 11 |                      | AAQDSFAAGWGMVSHR                       | 358  | 17 | 5  | 22.9   | b8b13y5°y5y15                                                        | 1789.81 | 82.080  | 5496   | 2 | 895.41  | -17.53 |
| P00924 ENO1_YEAST Enolase 1  | 12 |                      | AVDDFLISLDGTANK                        | 88   | 15 | 6  | 47.55  | b4b5b9b13y6y11                                                       | 1578.77 | 136.588 | 4061   | 1 | 1578.77 | -19.33 |
| P00924 ENO1_YEAST Enolase 1  | 13 |                      | RYGASAGNVGDEGGVAPNIQTAE<br>EALDLIVDAIK | 200  | 34 | 9  | 36.47  | b5°b5b9°b9°b9b10°b10b11°b11                                          | 3413.76 | 126.693 | 106050 | 3 | 1138.59 | 12.52  |
| P00924 ENO1_YEAST Enolase 1  | 14 |                      | IEEELGDNAVAFAGENFHGDKL                 | 415  | 22 | 3  | 13.43  | b12y10y12                                                            | 2441.11 | 63.651  | 49746  | 4 | 611.03  | -10.70 |
| P00924 ENO1_YEAST Enolase 1  | 15 |                      | GNPTVEVELTTEKGVFR                      | 15   | 17 | 3  | 23.71  | b6b10b15                                                             | 1875.97 | 71.258  | 12574  | 2 | 938.49  | -8.33  |
| P00924 ENO1_YEAST Enolase 1  | 16 | Phosphoryl STY(14)   | TAGIQIVADDLTVTNPKR                     | 312  | 18 | 5  | 22.73  | b9°b9b12°b12b15_H3P<br>O4 b15                                        | 1992.01 | 61.342  | 317684 | 3 | 664.67  | 1.23   |
| P00924 ENO1_YEAST Enolase 1  | 17 | Phosphoryl STY(10)   | GNPTVEVELTTEK                          | 15   | 13 | 5  | 48.3   | b4b8y5y6y7                                                           | 1496.68 | 88.715  | 2493   | 3 | 499.57  | 4.16   |
| P00924 ENO1_YEAST Enolase 1  | 18 | Oxidation+M(17)      | SIVPSGASTGVHEALEMRDGDK                 | 32   | 22 | 5  | 20.85  | b16y3y12y21°y21                                                      | 2272.08 | 66.115  | 672323 | 3 | 758.03  | -2.26  |
| P00924 ENO1_YEAST Enolase 1  | 19 |                      | ENFHHGDK                               | 428  | 8  | 0  | 6.48   |                                                                      | 983.43  | 57.419  | 4087   | 1 | 983.43  | -3.35  |
| P35580 MYH10_HUMAN Myosin-10 | 1  |                      | LDPHLVLDQLR                            | 689  | 11 | 8  | 81.71  | b1y3y4y5y6y7y9y11                                                    | 1318.74 | 71.455  | 181095 | 2 | 659.88  | -2.68  |
| P35580 MYH10_HUMAN Myosin-10 | 2  | Carbamidomethyl+C(9) | VEDMAELTCLNEASVLHNLK                   | 86   | 20 | 8  | 33.43  | b2b3y1y4y10y13y18y20                                                 | 2286.10 | 80.061  | 131555 | 3 | 762.70  | -5.55  |
| P35580 MYH10_HUMAN Myosin-10 | 3  |                      | TQLEEELEDELQATEDAK                     | 1545 | 17 | 24 | 172.26 | b2*b2b5b6b9b10b11*b11b12°b12*b12b13*b13b14y2y4y5y6y9y13*y13y14y15y17 | 1961.93 | 79.205  | 128856 | 2 | 981.47  | 5.60   |
| P35580 MYH10_HUMAN Myosin-10 | 4  |                      | AGVLAHLEEER                            | 771  | 11 | 6  | 50.51  | y2y3y4y5y6y11                                                        | 1223.63 | 50.165  | 59868  | 2 | 612.32  | -5.79  |
| P35580 MYH10_HUMAN Myosin-10 | 5  | Carbamidomethyl+C(1) | CNGVLEGIR                              | 700  | 9  | 7  | 54.47  | b2*b2y3y4y5y7y9                                                      | 1017.51 | 49.140  | 45436  | 2 | 509.26  | -2.88  |
| P35580 MYH10_HUMAN Myosin-10 | 6  |                      | LQNELDNVSTLLEEA EK                     | 1284 | 17 | 7  | 36.71  | b4b7°b7b10°b10°b10b12                                                | 1944.98 | 79.649  | 16207  | 2 | 972.99  | 0.31   |
| P35580 MYH10_HUMAN Myosin-10 | 7  | Carbamidomethyl+C(2) | LCHLLGMNVMEFTR                         | 380  | 14 | 5  | 42.39  | b3b9b12b13y3                                                         | 1720.82 | 71.190  | 9634   | 3 | 574.28  | -5.39  |
| P35580 MYH10_HUMAN Myosin-10 | 8  |                      | ADMEDLMSSKDDVVGK                       | 1510 | 15 | 6  | 44.67  | b7y3y5y7y11°y11                                                      | 1640.73 | 46.134  | 4975   | 2 | 820.87  | 6.62   |
| P35580 MYH10_HUMAN Myosin-10 | 9  |                      | IAQLEEELEEEQSNMELLNDR                  | 1737 | 21 | 3  | 13.86  | b3b7y12                                                              | 2532.14 | 84.350  | 4294   | 3 | 844.72  | -13.31 |
| P35580 MYH10_HUMAN Myosin-10 | 10 |                      | HATALEELSEQLEQAK                       | 1200 | 16 | 3  | 23.68  | b9b10y13                                                             | 1796.88 | 62.072  | 2271   | 3 | 599.63  | -13.93 |
| P35580 MYH10_HUMAN Myosin-10 | 11 |                      | EIFMQVEDERR                            | 1852 | 11 | 4  | 41.48  | b9y6y7y8                                                             | 1451.70 | 42.324  | 2089   | 3 | 484.57  | 1.09   |
| P35580 MYH10_HUMAN Myosin-10 | 12 |                      | ESLTK                                  | 658  | 5  | 6  | 39.64  | b3°b3b4°b4y3°y3                                                      | 577.32  | 38.983  | 260471 | 1 | 577.32  | 0.74   |
| P35580 MYH10_HUMAN Myosin-10 | 13 |                      | ALELDPNLYR                             | 752  | 10 | 5  | 40.11  | b9y3y7y8°y8                                                          | 1203.62 | 40.027  | 210957 | 2 | 602.31  | -13.29 |
| P35580 MYH10_HUMAN Myosin-10 | 14 |                      | QLEEAEEEEATR                           | 1884 | 11 | 5  | 36.71  | b3b4°b4b8y9                                                          | 1304.61 | 43.051  | 39107  | 2 | 652.81  | 6.74   |
| P35580 MYH10_HUMAN Myosin-10 | 15 |                      | VELAEK                                 | 1275 | 6  | 1  | 13.62  | b5                                                                   | 688.39  | 44.758  | 16193  | 1 | 688.39  | -1.24  |
| P35580 MYH10_HUMAN Myosin-10 | 16 |                      | ALAYDK                                 | 1411 | 6  | 2  | 13.62  | y4°y4                                                                | 680.36  | 55.586  | 12414  | 1 | 680.36  | 1.53   |



|                              |    |                       |                         |      |    |    |       |                              |         |         |        |   |         |        |
|------------------------------|----|-----------------------|-------------------------|------|----|----|-------|------------------------------|---------|---------|--------|---|---------|--------|
| P35580 MYH10_HUMAN Myosin-10 | 17 |                       | HQQLLEEK                | 881  | 8  | 5  | 49.3  | b3*b3b6b7y3                  | 1024.54 | 46.097  | 12150  | 2 | 512.77  | -6.20  |
| P35580 MYH10_HUMAN Myosin-10 | 18 |                       | EIFMQVEDER              | 1852 | 10 | 5  | 52.53 | b3b7y4y5y8                   | 1295.61 | 43.023  | 11791  | 3 | 432.54  | 16.30  |
| P35580 MYH10_HUMAN Myosin-10 | 19 |                       | LLIK                    | 1592 | 4  | 1  | 12.81 | y3                           | 486.37  | 54.663  | 10149  | 1 | 486.37  | 5.96   |
| P35580 MYH10_HUMAN Myosin-10 | 20 |                       | QELEEIHDLESR            | 917  | 13 | 3  | 20.63 | b9y8y11                      | 1610.79 | 55.600  | 5569   | 2 | 805.90  | -6.67  |
| P35580 MYH10_HUMAN Myosin-10 | 21 |                       | QEVMSIDLEER             | 1031 | 11 | 5  | 50.71 | b9b10y5y8y9                  | 1348.67 | 73.784  | 4327   | 2 | 674.84  | 21.27  |
| P35580 MYH10_HUMAN Myosin-10 | 22 |                       | NHEAQIQDMR              | 1188 | 10 | 7  | 54.29 | b5*b5b6b8*b8y8y9             | 1241.56 | 32.031  | 4283   | 2 | 621.28  | -6.19  |
| P35580 MYH10_HUMAN Myosin-10 | 23 |                       | VDDDLGTIESLEEAK         | 1379 | 15 | 3  | 18.12 | b8b12y13                     | 1633.81 | 60.327  | 4225   | 2 | 817.41  | 15.62  |
| P35580 MYH10_HUMAN Myosin-10 | 24 |                       | SDNAR                   | 1782 | 5  | 1  | 13.21 | y3                           | 562.26  | 44.130  | 4162   | 1 | 562.26  | 5.86   |
| P35580 MYH10_HUMAN Myosin-10 | 25 |                       | SLEAEILQQEELASSER       | 1683 | 18 | 3  | 15.57 | b4y3y6                       | 2045.03 | 112.245 | 4118   | 3 | 682.35  | -5.49  |
| P35580 MYH10_HUMAN Myosin-10 | 26 |                       | DHNPGELEER              | 206  | 10 | 3  | 28.65 | b5y6y7                       | 1179.59 | 52.838  | 3651   | 2 | 590.30  | 16.56  |
| P35580 MYH10_HUMAN Myosin-10 | 27 |                       | IGQLEEQLQEAK            | 1822 | 13 | 3  | 20.63 | b3b8y8                       | 1514.77 | 97.540  | 3522   | 2 | 757.89  | 0.56   |
| P35580 MYH10_HUMAN Myosin-10 | 28 |                       | ELEEAR                  | 1659 | 6  | 1  | 13.62 | y5                           | 746.38  | 35.964  | 3074   | 1 | 746.38  | 10.96  |
| P35580 MYH10_HUMAN Myosin-10 | 29 |                       | DLEAQIEAANK             | 1627 | 11 | 7  | 61.3  | b3*b3b5*b5b8b10*b10          | 1201.59 | 46.147  | 2689   | 2 | 601.30  | -16.86 |
| P35580 MYH10_HUMAN Myosin-10 | 30 |                       | LDGETTDLQDQIAELQAQIDELK | 1059 | 23 | 3  | 13.04 | b3b8y6                       | 2586.24 | 109.656 | 2574   | 4 | 647.32  | -14.54 |
| P35580 MYH10_HUMAN Myosin-10 | 31 |                       | IVGLDQVTGMTETAFGSAYK    | 624  | 20 | 6  | 25.23 | b13y8*y8y11*y11y12           | 2088.03 | 93.295  | 2221   | 3 | 696.68  | -0.47  |
| P35580 MYH10_HUMAN Myosin-10 | 32 | Carbamidomethyl+C(12) | ITDIIFFQAVCR            | 785  | 13 | 4  | 43.08 | y3y7y8y9                     | 1595.87 | 65.887  | 2072   | 3 | 532.63  | 5.97   |
| P35580 MYH10_HUMAN Myosin-10 | 33 |                       | EQADFAVEALAK            | 414  | 12 | 5  | 34.22 | b9y6y7y10*y10                | 1291.63 | 38.235  | 1975   | 2 | 646.32  | -19.18 |
| P35580 MYH10_HUMAN Myosin-10 | 34 |                       | ELEAELEDER              | 1599 | 10 | 5  | 39.31 | b6b9*b9y6y8                  | 1232.55 | 31.965  | 1863   | 3 | 411.52  | -10.20 |
| P35580 MYH10_HUMAN Myosin-10 | 35 |                       | LQQLDDLTVDLDHQR         | 1424 | 16 | 7  | 34.74 | b4*b4b12y4*y4y11y13          | 1937.97 | 80.263  | 1858   | 4 | 485.25  | 8.82   |
| P35580 MYH10_HUMAN Myosin-10 | 36 |                       | VEGELEEMER              | 870  | 10 | 3  | 26.89 | b5y3y6                       | 1220.55 | 90.715  | 1699   | 1 | 1220.55 | 3.10   |
| P35580 MYH10_HUMAN Myosin-10 | 37 |                       | NSLQEQEEEEEAR           | 1345 | 14 | 4  | 19.27 | b7*b7y3y7                    | 1718.75 | 41.862  | 1618   | 2 | 859.88  | 3.55   |
| P35580 MYH10_HUMAN Myosin-10 | 38 |                       | KEEELQGALAR             | 1087 | 11 | 4  | 31.28 | b3b7b8*b8                    | 1243.66 | 28.237  | 240107 | 2 | 622.33  | -2.26  |
| P35580 MYH10_HUMAN Myosin-10 | 39 |                       | NHEAQIQDMRQR            | 1188 | 12 | 5  | 35.48 | b6*b6b7*b7b8                 | 1525.74 | 48.303  | 64891  | 3 | 509.25  | 6.72   |
| P35580 MYH10_HUMAN Myosin-10 | 40 |                       | RHEMPPHIYAISESAYR       | 146  | 17 | 10 | 55.55 | b4*b4b7b11*b11b13*b13y7y9y11 | 2057.00 | 71.965  | 47626  | 3 | 686.34  | -2.49  |
| P35580 MYH10_HUMAN Myosin-10 | 41 |                       | QTKVEGELEEMER           | 867  | 13 | 3  | 25.4  | b10b11y3                     | 1577.73 | 63.741  | 47450  | 3 | 526.58  | -9.05  |
| P35580 MYH10_HUMAN Myosin-10 | 42 | Carbamidomethyl+C(12) | ITDIIFFQAVCRGYLAR       | 785  | 18 | 5  | 36.53 | b3*b3b4y6y7                  | 2156.14 | 136.555 | 15195  | 3 | 719.38  | -13.25 |
| P35580 MYH10_HUMAN Myosin-10 | 43 |                       | EEELQGALARGDDELHKK      | 1088 | 18 | 5  | 30.96 | b4b14b16y6y8                 | 2011.00 | 62.976  | 14768  | 4 | 503.51  | 14.45  |
| P35580 MYH10_HUMAN Myosin-10 | 44 |                       | QRHATALEELSEQLEQAK      | 1198 | 18 | 3  | 15.57 | b10b13y11                    | 2081.08 | 72.028  | 14439  | 3 | 694.36  | 6.34   |
| P35580 MYH10_HUMAN Myosin-10 | 45 |                       | DAEALSQRLEEK            | 1399 | 12 | 5  | 37.24 | b5*b5b7b10y7                 | 1388.69 | 57.008  | 13342  | 2 | 694.85  | -6.42  |

|                                                         |    |                       |                                    |      |    |    |       |                              |         |         |        |   |         |        |
|---------------------------------------------------------|----|-----------------------|------------------------------------|------|----|----|-------|------------------------------|---------|---------|--------|---|---------|--------|
| P35580 MYH10_HUMAN Myosin-10                            | 46 |                       | KMEEEILLLEDQNSK                    | 981  | 15 | 4  | 36.69 | b4b7b12b13                   | 1818.93 | 86.745  | 12055  | 2 | 909.97  | 6.38   |
| P35580 MYH10_HUMAN Myosin-10                            | 47 |                       | DLSEEEALKTELEDLDTTAAQQ<br>ELR      | 1142 | 27 | 4  | 17.77 | b11y7y13y25                  | 3061.47 | 91.823  | 9138   | 3 | 1021.16 | -10.93 |
| P35580 MYH10_HUMAN Myosin-10                            | 48 |                       | VEGELEEMERK                        | 870  | 11 | 3  | 27.3  | b3y5y6                       | 1348.65 | 80.376  | 7932   | 2 | 674.83  | 4.53   |
| P35580 MYH10_HUMAN Myosin-10                            | 49 |                       | TFVEKLVQEQGSHSK                    | 547  | 15 | 3  | 18.12 | b4y3y9                       | 1716.87 | 52.962  | 6226   | 3 | 572.96  | -14.15 |
| P35580 MYH10_HUMAN Myosin-10                            | 50 |                       | RHAEQER                            | 1703 | 7  | 3  | 40.45 | b4b5b6                       | 925.45  | 89.889  | 6120   | 1 | 925.45  | -12.14 |
| P35580 MYH10_HUMAN Myosin-10                            | 51 |                       | SDLLEGFNNYRFLSNGYIPIPGQ<br>DK      | 296  | 27 | 5  | 17.77 | b4*b4b9b14y4                 | 3098.55 | 91.353  | 5309   | 3 | 1033.52 | -2.21  |
| P35580 MYH10_HUMAN Myosin-10                            | 52 |                       | LQQLDDLTVDLDHQRQVASNLE<br>K        | 1424 | 24 | 3  | 19.01 | b3b9b21                      | 2807.40 | 83.879  | 3660   | 3 | 936.47  | -6.52  |
| P35580 MYH10_HUMAN Myosin-10                            | 53 |                       | NRLQQLDDLTVDLDHQR                  | 1422 | 18 | 3  | 22.73 | y5y8y13                      | 2208.10 | 71.068  | 3545   | 3 | 736.70  | -0.11  |
| P35580 MYH10_HUMAN Myosin-10                            | 54 |                       | DAASLESQLDQTQELLQEETRQK            | 1308 | 23 | 3  | 13.04 | b6b9y11                      | 2660.27 | 92.238  | 2831   | 3 | 887.43  | -11.66 |
| P35580 MYH10_HUMAN Myosin-10                            | 55 |                       | QELEEILHDLESRVEEEEER               | 917  | 20 | 9  | 38.86 | b4b6b9*b9y3*y3y4y10*y<br>10  | 2511.19 | 54.283  | 2724   | 4 | 628.55  | 4.08   |
| P35580 MYH10_HUMAN Myosin-10                            | 56 |                       | KVIQYLAHVASSHK                     | 189  | 14 | 3  | 24.71 | b12y5y6                      | 1580.90 | 62.907  | 2468   | 4 | 395.98  | 6.02   |
| P35580 MYH10_HUMAN Myosin-10                            | 57 | Carbamidomethyl+C(17) | NTDQASMPENTVAQKLCHELLGM<br>NVMEFTR | 365  | 29 | 3  | 22.71 | y4y5y10                      | 3335.59 | 110.965 | 2290   | 4 | 834.65  | 6.37   |
| P35580 MYH10_HUMAN Myosin-10                            | 58 | Carbamidomethyl+C(9)  | LMEDRIAECSSQLAEEEEK                | 1002 | 19 | 3  | 21.88 | b7b9b13                      | 2267.02 | 77.329  | 2242   | 4 | 567.51  | -0.22  |
| P35580 MYH10_HUMAN Myosin-10                            | 59 |                       | ALEEALAKEEFER                      | 1490 | 14 | 6  | 39    | b3b8y3y4y10*y10              | 1663.81 | 101.184 | 2031   | 3 | 555.27  | -6.75  |
| P35580 MYH10_HUMAN Myosin-10                            | 60 |                       | AQRTGLEDPER                        | 1    | 11 | 5  | 27.3  | b9b10*b10*b10y8              | 1271.65 | 35.489  | 1592   | 3 | 424.55  | 9.60   |
| P35580 MYH10_HUMAN Myosin-10                            | 61 |                       | DVDRIVGLDQVTGMTETAFGSAY<br>K       | 620  | 24 | 3  | 22.99 | y5y8y9                       | 2573.22 | 106.899 | 1536   | 2 | 1287.12 | -12.14 |
| P35580 MYH10_HUMAN Myosin-10                            | 62 | Phosphoryl STY(13)    | ASRDEIFAQSKSEK                     | 1665 | 15 | 5  | 29.42 | b4b12*b12b13y12              | 1804.82 | 55.330  | 4219   | 2 | 902.91  | 8.32   |
| P35580 MYH10_HUMAN Myosin-10                            | 63 | Phosphoryl STY(4)     | AVIYNPATQADWTAK                    | 18   | 15 | 6  | 29.42 | b4y6*y6y8y11*y11             | 1728.79 | 42.938  | 3674   | 2 | 864.90  | 0.49   |
| P35580 MYH10_HUMAN Myosin-10                            | 64 | Oxidation+M(2)        | NMDPLNDNVATLLHQSSDR                | 594  | 19 | 3  | 14.93 | b12y11y13                    | 2155.98 | 48.036  | 5848   | 3 | 719.33  | -12.12 |
| P35580 MYH10_HUMAN Myosin-10                            | 65 | Oxidation+M(3)        | HEMPPHIYAISESAYR                   | 147  | 16 | 5  | 35.41 | b11b13b14y5y8                | 1916.87 | 88.639  | 2651   | 2 | 958.94  | -11.34 |
| P35580 MYH10_HUMAN Myosin-10                            | 66 | Oxidation+M(8)        | VEGELEEMERK                        | 870  | 11 | 3  | 36.05 | b3b4b5                       | 1364.64 | 63.819  | 2251   | 3 | 455.55  | 5.81   |
| P48741 HSP77_HUMAN Putative heat shock 70 kDa protein 7 | 1  |                       | TTPSYVAFTDTER                      | 38   | 13 | 10 | 67.47 | b1b5*b5y3y4*y4y6y9y1<br>1y13 | 1487.70 | 55.395  | 55293  | 2 | 744.36  | 1.15   |
| P48741 HSP77_HUMAN Putative heat shock 70 kDa protein 7 | 2  |                       | ATAGDTHLGGEDFDNR                   | 222  | 16 | 4  | 17.15 | b6*b6b12y11                  | 1675.71 | 41.886  | 2085   | 3 | 559.24  | -11.36 |
| P48741 HSP77_HUMAN Putative heat shock 70 kDa protein 7 | 3  |                       | FADTTVQSDMK                        | 79   | 11 | 6  | 38.29 | b5b6y4y6*y6*y6               | 1242.55 | 68.155  | 230897 | 3 | 414.85  | -13.85 |
| P48741 HSP77_HUMAN Putative heat shock 70 kDa protein 7 | 4  |                       | TPSSSTQATLEIDSLFEGVDFYK            | 274  | 23 | 5  | 28.79 | y6y8*y8y9y12                 | 2535.26 | 103.757 | 9332   | 3 | 845.76  | 16.66  |
| P48741 HSP77_HUMAN Putative heat shock 70 kDa protein 7 | 5  |                       | HAVITVPTYFSNSQR                    | 142  | 15 | 5  | 34.66 | y4*y4y5*y5y6                 | 1719.90 | 63.838  | 9117   | 2 | 860.45  | 8.16   |
| P48741 HSP77_HUMAN Putative heat shock 70 kDa protein 7 | 6  |                       | SQAALNPHTVFDK                      | 58   | 15 | 3  | 18.12 | b11b13y9                     | 1612.81 | 60.933  | 5438   | 2 | 806.91  | -1.67  |
| P48741 HSP77_HUMAN Putative heat shock 70 kDa protein 7 | 7  |                       | TFYPPEISSMVLK                      | 114  | 14 | 7  | 32.99 | b6b12*b12y11*y11y12*<br>y12  | 1630.81 | 48.214  | 4205   | 2 | 815.91  | 4.12   |
| P48741 HSP77_HUMAN Putative heat shock 70 kDa protein 7 | 8  |                       | LVNHFMEEFR                         | 238  | 10 | 4  | 26.89 | b7*b7y5y9                    | 1321.63 | 97.427  | 2682   | 2 | 661.32  | -5.73  |

|                                                         |    |                                              |                                             |     |    |   |       |                           |         |         |        |   |         |        |
|---------------------------------------------------------|----|----------------------------------------------|---------------------------------------------|-----|----|---|-------|---------------------------|---------|---------|--------|---|---------|--------|
| P48741 HSP77_HUMAN Putative heat shock 70 kDa protein 7 | 9  | Phosphoryl STY(9)                            | TPSSSTQATLEIDSLFEGVDFYK                     | 274 | 23 | 4 | 28.79 | b3b5b7b8                  | 2615.15 | 125.324 | 191398 | 3 | 872.39  | -6.44  |
| O00151 PDLI1_HUMAN PDZ and LIM domain protein 1         | 1  | Carbamidomethyl+C(7)                         | AALANLCIGDVITAIDGENTSNTM HLEAQR             | 38  | 31 | 9 | 65.57 | b3b4b5y4y6y11y12y23y25    | 3312.61 | 95.846  | 60092  | 3 | 1104.87 | 3.91   |
| O00151 PDLI1_HUMAN PDZ and LIM domain protein 1         | 2  | Carbamidomethyl+C(1)                         | CGTGVIVGVFK                                 | 262 | 11 | 5 | 24.29 | b2b3b7y6y11               | 1136.61 | 69.830  | 44443  | 2 | 568.81  | -5.05  |
| O00151 PDLI1_HUMAN PDZ and LIM domain protein 1         | 3  |                                              | LVGGKDFEQPLAISR                             | 17  | 15 | 5 | 26.21 | b2y4y6y13y15              | 1629.89 | 58.955  | 43382  | 3 | 543.97  | -6.14  |
| O00151 PDLI1_HUMAN PDZ and LIM domain protein 1         | 4  |                                              | SAMPFTASPASSTAR                             | 122 | 16 | 6 | 35.05 | b1y8y10y11y13y16          | 1582.75 | 50.594  | 16816  | 2 | 791.88  | 0.00   |
| O00151 PDLI1_HUMAN PDZ and LIM domain protein 1         | 5  |                                              | VTPPEGYEVVTVFK                              | 314 | 15 | 5 | 31.8  | b13b14y6y12°y12           | 1661.90 | 55.542  | 169855 | 3 | 554.64  | 13.52  |
| O00151 PDLI1_HUMAN PDZ and LIM domain protein 1         | 6  |                                              | MNLASEPQEVHIGSAHR                           | 103 | 19 | 6 | 46.17 | y3y6°y6y7y8y13            | 2103.03 | 62.249  | 14728  | 3 | 701.68  | -3.25  |
| O00151 PDLI1_HUMAN PDZ and LIM domain protein 1         | 7  |                                              | QELNEPPK                                    | 203 | 8  | 5 | 36.08 | b3°b3b5°b5y6              | 954.47  | 46.118  | 9721   | 2 | 477.74  | -18.54 |
| O00151 PDLI1_HUMAN PDZ and LIM domain protein 1         | 8  |                                              | MTTQQIDLQGGPWGFR                            | 0   | 17 | 3 | 23.71 | b4b9b13                   | 1931.93 | 50.833  | 8404   | 2 | 966.47  | -8.02  |
| O00151 PDLI1_HUMAN PDZ and LIM domain protein 1         | 9  |                                              | TTQQIDLQGGPWGFR                             | 1   | 16 | 4 | 17.15 | b12y11°y11y14             | 1800.90 | 61.073  | 7482   | 2 | 900.95  | -4.20  |
| O00151 PDLI1_HUMAN PDZ and LIM domain protein 1         | 10 |                                              | QSTSFLVLQEILESEEK                           | 211 | 17 | 5 | 41.56 | b6b8b9b10y12              | 1980.02 | 91.297  | 7113   | 3 | 660.68  | 3.51   |
| O00151 PDLI1_HUMAN PDZ and LIM domain protein 1         | 11 |                                              | MLQEK                                       | 198 | 5  | 1 | 13.21 | b4                        | 648.34  | 34.294  | 4719   | 2 | 324.67  | -2.92  |
| O00151 PDLI1_HUMAN PDZ and LIM domain protein 1         | 12 |                                              | VITNQYNNPAGLYSSENISNFNNA LESK               | 138 | 28 | 6 | 20.5  | b8b14°b14y7y9y12          | 3101.54 | 113.273 | 2799   | 4 | 776.14  | 18.58  |
| O00151 PDLI1_HUMAN PDZ and LIM domain protein 1         | 13 |                                              | QELNEPPKQSTSFLVLQEILESEEK                   | 203 | 25 | 3 | 18.62 | y8y13y20                  | 2915.53 | 105.882 | 206915 | 3 | 972.51  | 14.15  |
| O00151 PDLI1_HUMAN PDZ and LIM domain protein 1         | 14 |                                              | SAMPFTASPASSTARVITNQYNNPAGLYSSENISNFNNALESK | 122 | 44 | 8 | 29.34 | b7b15b16°b16y8y13y24y26   | 4665.16 | 109.894 | 19521  | 4 | 1167.05 | -12.46 |
| O00151 PDLI1_HUMAN PDZ and LIM domain protein 1         | 15 |                                              | TAASGVEANSRPLDHAQPSSSLV DKSEVYK             | 166 | 32 | 6 | 31.73 | b4b6b15°b15b17b22         | 3395.69 | 105.826 | 4357   | 4 | 849.68  | -4.46  |
| O00151 PDLI1_HUMAN PDZ and LIM domain protein 1         | 16 |                                              | SEHKVWSPLVTEEGK                             | 83  | 15 | 4 | 36.69 | b4b6b7b9                  | 1725.87 | 84.405  | 3412   | 4 | 432.22  | -7.64  |
| O00151 PDLI1_HUMAN PDZ and LIM domain protein 1         | 17 | Carbamidomethyl+C(4); Carbamidomethyl+C(7)   | LPMCDKCGTGVGVFK                             | 256 | 17 | 5 | 34.5  | b12b13°b13b14°b14         | 1880.92 | 88.603  | 2541   | 2 | 940.97  | -9.99  |
| O00151 PDLI1_HUMAN PDZ and LIM domain protein 1         | 18 | Phosphoryl STY(11)                           | VTPPEGYEVVTVFK                              | 314 | 15 | 7 | 44.67 | b6°b6b9°b9b12b14y10       | 1741.82 | 69.680  | 13026  | 2 | 871.41  | -8.83  |
| O00151 PDLI1_HUMAN PDZ and LIM domain protein 1         | 19 | Oxidation+M(1)                               | MTTQQIDLQGGPWGFR                            | 0   | 17 | 4 | 23.71 | y5y11y13*y13              | 1947.95 | 71.005  | 4719   | 2 | 974.48  | 8.46   |
| O00151 PDLI1_HUMAN PDZ and LIM domain protein 1         | 20 | Oxidation+M(1)                               | MNLASEPQEVHIGSAHR                           | 103 | 19 | 7 | 36.24 | b12b13°b13y7*y7y8°y8      | 2119.05 | 111.979 | 3289   | 3 | 707.02  | 8.87   |
| P07237 PDIA1_HUMAN Protein disulfide-isomerase          | 1  |                                              | NNFEGEVTKENLLDFIK                           | 213 | 17 | 5 | 42.15 | b3b4b9b10b17              | 2010.03 | 109.885 | 18037  | 3 | 670.68  | 5.22   |
| P07237 PDIA1_HUMAN Protein disulfide-isomerase          | 2  |                                              | TGPAATTLPDGAAAESLVESSEVA VIGFFK             | 132 | 30 | 5 | 24.76 | b11b25y2y3y4              | 2935.47 | 119.944 | 7396   | 3 | 979.16  | -8.65  |
| P07237 PDIA1_HUMAN Protein disulfide-isomerase          | 3  |                                              | YKPESEELTAER                                | 326 | 12 | 5 | 36.14 | b5b6y4y10y12              | 1451.68 | 34.846  | 7236   | 3 | 484.57  | -14.46 |
| P07237 PDIA1_HUMAN Protein disulfide-isomerase          | 4  |                                              | EYTAGREADDIVNWLK                            | 114 | 16 | 8 | 27.65 | b2b6y10*y10y12*y12y14°y14 | 1879.91 | 116.601 | 4140   | 3 | 627.31  | -5.58  |
| P07237 PDIA1_HUMAN Protein disulfide-isomerase          | 5  | Carbamidomethyl+C(11); Carbamidomethyl+C(14) | YLLVEFYAPWCGHCK                             | 42  | 15 | 3 | 18.12 | b13y3y9                   | 1942.94 | 79.619  | 62540  | 3 | 648.32  | 20.04  |
| P07237 PDIA1_HUMAN Protein disulfide-isomerase          | 6  |                                              | TLDGFK                                      | 461 | 6  | 2 | 13.62 | b4°b4                     | 680.36  | 33.597  | 9615   | 1 | 680.36  | -5.74  |

|                                                  |    |                                             |                                   |     |    |    |       |                                                    |         |         |       |   |         |        |
|--------------------------------------------------|----|---------------------------------------------|-----------------------------------|-----|----|----|-------|----------------------------------------------------|---------|---------|-------|---|---------|--------|
| P07237 PDIA1_HUMAN Protein disulfide-isomerase   | 7  | Carbamidomethyl+C(11);Carbamidomethyl+C(14) | NVVFVEFYAPWCGHCK                  | 386 | 15 | 3  | 18.12 | b11y7y11                                           | 1913.83 | 45.244  | 9308  | 4 | 479.21  | -10.91 |
| P07237 PDIA1_HUMAN Protein disulfide-isomerase   | 8  |                                             | LITLEEEMTK                        | 316 | 10 | 4  | 54.88 | y5y6y8y9                                           | 1206.63 | 55.354  | 5927  | 2 | 603.82  | -3.04  |
| P07237 PDIA1_HUMAN Protein disulfide-isomerase   | 9  |                                             | HNQLPLVIEFTEQTAPK                 | 230 | 17 | 5  | 22.9  | b5b13y6*y6y11                                      | 1965.05 | 80.290  | 5043  | 3 | 655.69  | 2.86   |
| P07237 PDIA1_HUMAN Protein disulfide-isomerase   | 10 |                                             | NGDTASPK                          | 106 | 8  | 8  | 77.48 | b4*b4b5b6b7y3*y3y4                                 | 789.38  | 33.564  | 4218  | 1 | 789.38  | 11.52  |
| P07237 PDIA1_HUMAN Protein disulfide-isomerase   | 11 |                                             | VDATEESDLAQQYGVR                  | 81  | 16 | 3  | 17.15 | b3b14y9                                            | 1780.83 | 74.479  | 3946  | 3 | 594.28  | -3.02  |
| P07237 PDIA1_HUMAN Protein disulfide-isomerase   | 12 |                                             | IKPHLMSQELPEDWDK                  | 350 | 16 | 3  | 17.15 | b5y3y10                                            | 1965.94 | 48.262  | 3438  | 2 | 983.47  | -18.32 |
| P07237 PDIA1_HUMAN Protein disulfide-isomerase   | 13 |                                             | NFEDVAFDEK                        | 375 | 10 | 4  | 26.89 | b7y4*y4y7                                          | 1213.54 | 50.851  | 1841  | 3 | 405.19  | 4.63   |
| P07237 PDIA1_HUMAN Protein disulfide-isomerase   | 14 |                                             | TVIDYNGERTLDGFK                   | 452 | 15 | 5  | 39.9  | b5b6b9b11y11                                       | 1727.88 | 58.952  | 18083 | 3 | 576.63  | 8.90   |
| P07237 PDIA1_HUMAN Protein disulfide-isomerase   | 15 |                                             | VLVGKNFEDVAFDEK                   | 370 | 15 | 3  | 18.12 | b8y3y6                                             | 1709.87 | 25.366  | 7262  | 3 | 570.63  | -5.14  |
| P07237 PDIA1_HUMAN Protein disulfide-isomerase   | 16 | Carbamidomethyl+C(4)                        | KEECPAVR                          | 308 | 8  | 3  | 33.07 | b3y5y6                                             | 988.48  | 99.245  | 3101  | 1 | 988.48  | -3.64  |
| P07237 PDIA1_HUMAN Protein disulfide-isomerase   | 17 |                                             | VHSFPTLKFPPASADR                  | 436 | 16 | 7  | 42.62 | b4b5*b5b6b15y6*y6                                  | 1819.94 | 112.388 | 1598  | 2 | 910.47  | -6.64  |
| P07237 PDIA1_HUMAN Protein disulfide-isomerase   | 18 | Phosphoryl STY(13)                          | VDATEESDLAQQYGVR                  | 81  | 16 | 6  | 37.85 | b3b7*b7b11b12y4_H3P<br>O4 y4                       | 1860.78 | 47.762  | 3310  | 3 | 620.93  | -5.05  |
| P07237 PDIA1_HUMAN Protein disulfide-isomerase   | 19 | Phosphoryl STY(8)                           | ILFIFIDSHTDNQR                    | 285 | 15 | 4  | 24.15 | b9_H3PO4 b9*b9b10y6                                | 1913.84 | 46.190  | 1632  | 3 | 638.62  | -13.27 |
| P07237 PDIA1_HUMAN Protein disulfide-isomerase   | 20 |                                             | EYTAGREADDIVNWLK                  | 114 | 16 | 0  | 4.45  |                                                    | 1861.89 | 116.580 | 1540  | 3 | 621.30  | -8.13  |
| O75083 WDR1_HUMAN WD repeat-containing protein 1 | 1  |                                             | VFASLPQVER                        | 7   | 10 | 6  | 33.88 | b2y5*y5y7y8y10                                     | 1145.63 | 58.974  | 69052 | 2 | 573.32  | -2.66  |
| O75083 WDR1_HUMAN WD repeat-containing protein 1 | 2  |                                             | SYIYSGSHDGHINYWDSETGENDS<br>FAGK  | 334 | 28 | 6  | 14.89 | b1b2b11b14y7y9                                     | 3136.29 | 60.011  | 33374 | 4 | 784.83  | -9.65  |
| O75083 WDR1_HUMAN WD repeat-containing protein 1 | 3  |                                             | AHDGGIYAIWSWSPDSTHLLSASGD<br>K    | 231 | 25 | 8  | 16.29 | b1b11*b11b21y1y5*y5y<br>16                         | 2585.25 | 75.465  | 30905 | 3 | 862.42  | 7.84   |
| O75083 WDR1_HUMAN WD repeat-containing protein 1 | 4  |                                             | LYSILGTTLKDEGK                    | 470 | 14 | 7  | 39.8  | b7b13y2y3y5y9y14                                   | 1537.83 | 65.074  | 28840 | 3 | 513.28  | -14.21 |
| O75083 WDR1_HUMAN WD repeat-containing protein 1 | 5  |                                             | FGAVFLWDSGSSVGEITGHNK             | 126 | 21 | 10 | 54.44 | b4b5b13*b13b14b21y4y<br>12y15y21                   | 2208.04 | 69.607  | 20794 | 3 | 736.69  | -12.83 |
| O75083 WDR1_HUMAN WD repeat-containing protein 1 | 6  |                                             | YTSLMLRDYSGQGVVK                  | 389 | 16 | 3  | 25.52 | b3b5b6                                             | 1816.91 | 52.095  | 19826 | 3 | 606.31  | -8.33  |
| O75083 WDR1_HUMAN WD repeat-containing protein 1 | 7  | Carbamidomethyl+C(18)                       | GPVTDVAYSHDGAFLAVCDASK            | 489 | 22 | 5  | 20.85 | b16y3y6y13y22                                      | 2280.04 | 65.153  | 14470 | 2 | 1140.52 | -7.92  |
| O75083 WDR1_HUMAN WD repeat-containing protein 1 | 8  | Carbamidomethyl+C(26)                       | IWDVSVNSVSTFPMGSTVLDQQ<br>LGCLWQK | 259 | 30 | 17 | 72.19 | b1b2b3b4b6*b6b8*b8b9<br>b10*b10b13b14y1y2y6y<br>17 | 3394.70 | 112.263 | 11408 | 3 | 1132.24 | 5.03   |
| O75083 WDR1_HUMAN WD repeat-containing protein 1 | 9  |                                             | LHHVSSLAWLDEHTLVTTSHDAS<br>VK     | 575 | 25 | 6  | 22.72 | b4b9b12y6*y6y9                                     | 2783.43 | 129.479 | 14878 | 3 | 928.48  | 6.14   |
| O75083 WDR1_HUMAN WD repeat-containing protein 1 | 10 |                                             | YAPSGFYIASGDVSGK                  | 65  | 16 | 5  | 30.77 | b12*b12b13y5y15                                    | 1618.78 | 61.074  | 11500 | 2 | 809.89  | 0.98   |
| O75083 WDR1_HUMAN WD repeat-containing protein 1 | 11 | Carbamidomethyl+C(4)                        | SIQCLTVHK                         | 321 | 9  | 5  | 30.47 | b4y6*y6y7*y7                                       | 1085.58 | 35.163  | 10418 | 2 | 543.29  | -0.67  |
| O75083 WDR1_HUMAN WD repeat-containing protein 1 | 12 |                                             | LDVQPK                            | 405 | 6  | 1  | 13.62 | b5                                                 | 699.41  | 35.858  | 6400  | 1 | 699.41  | 6.81   |
| O75083 WDR1_HUMAN WD repeat-containing protein 1 | 13 |                                             | FTIGDHSR                          | 182 | 8  | 5  | 64.27 | b4b6b7y4y5                                         | 932.45  | 65.848  | 6331  | 2 | 466.73  | -8.05  |
| O75083 WDR1_HUMAN WD repeat-containing protein 1 | 14 |                                             | QSRPYR                            | 155 | 6  | 1  | 13.62 | b4                                                 | 806.44  | 39.955  | 3527  | 1 | 806.44  | 12.94  |

|                                                  |    |                       |                                                 |     |    |   |       |                      |         |         |       |   |         |        |
|--------------------------------------------------|----|-----------------------|-------------------------------------------------|-----|----|---|-------|----------------------|---------|---------|-------|---|---------|--------|
| O75083 WDR1_HUMAN WD repeat-containing protein 1 | 15 |                       | FATASADGQIYYIDGK                                | 203 | 16 | 4 | 17.15 | b3b9y5°y5            | 1719.83 | 73.816  | 2968  | 2 | 860.42  | 5.82   |
| O75083 WDR1_HUMAN WD repeat-containing protein 1 | 16 |                       | DIAWTEDSK                                       | 106 | 9  | 5 | 44.93 | b3b4y3°y3y5          | 1064.47 | 102.731 | 2298  | 1 | 1064.47 | -16.40 |
| O75083 WDR1_HUMAN WD repeat-containing protein 1 | 17 |                       | AHDGGIYAIWSPDSTHLLSASGD<br>KTSK                 | 231 | 28 | 3 | 21.91 | b7b8y7               | 2901.38 | 68.511  | 40620 | 4 | 726.10  | -8.67  |
| O75083 WDR1_HUMAN WD repeat-containing protein 1 | 18 | Carbamidomethyl+C(2)  | KCFSIDNPGYEPEVVAVHPGGDTV<br>AIGGVVDGNVR         | 436 | 34 | 3 | 16.72 | y4y8y16              | 3525.69 | 69.164  | 24847 | 4 | 882.18  | -5.26  |
| O75083 WDR1_HUMAN WD repeat-containing protein 1 | 19 |                       | SYIYSGSHDGHINYWDSETGENDS<br>FAGKGHTNQVSR        | 334 | 36 | 3 | 22.51 | b5b6y8               | 4015.80 | 71.944  | 13628 | 4 | 1004.70 | 11.19  |
| O75083 WDR1_HUMAN WD repeat-containing protein 1 | 20 | Carbamidomethyl+C(15) | QSRPYRLATGSDDNCAAFPEGPPF<br>K                   | 155 | 25 | 5 | 16.29 | b16b23°b23y6y13      | 2831.30 | 69.621  | 12020 | 3 | 944.44  | -7.42  |
| O75083 WDR1_HUMAN WD repeat-containing protein 1 | 21 | Carbamidomethyl+C(20) | GHTNQVSRMTVDESGQLISCSMD<br>DTVR                 | 362 | 27 | 5 | 21.9  | b7b8°b8y5°y5         | 3023.32 | 64.216  | 7806  | 5 | 605.47  | -12.68 |
| O75083 WDR1_HUMAN WD repeat-containing protein 1 | 22 | Carbamidomethyl+C(12) | FTIGDHSRFVNCVR                                  | 182 | 14 | 4 | 19.27 | b8b10y12°y12         | 1707.85 | 79.408  | 5414  | 3 | 569.95  | 3.86   |
| O75083 WDR1_HUMAN WD repeat-containing protein 1 | 23 |                       | FATASADGQIYYIDGKTGEK                            | 203 | 20 | 5 | 36.11 | b3b4y4y6y12          | 2135.04 | 98.330  | 4231  | 3 | 712.35  | 5.03   |
| O75083 WDR1_HUMAN WD repeat-containing protein 1 | 24 | Carbamidomethyl+C(4)  | FVNCVRFSPDGNR                                   | 190 | 13 | 3 | 20.63 | b7y5y8               | 1567.76 | 113.247 | 3748  | 2 | 784.38  | 11.21  |
| O75083 WDR1_HUMAN WD repeat-containing protein 1 | 25 |                       | FSPDGNRFATASADGQIYYIDGK                         | 196 | 23 | 4 | 13.04 | b4b11y6°y6           | 2493.13 | 79.577  | 2342  | 2 | 1247.07 | -13.61 |
| O75083 WDR1_HUMAN WD repeat-containing protein 1 | 26 |                       | EKFGAVFLWDSGSSVGEITGHNK                         | 124 | 23 | 7 | 47.04 | b4b6b14y13y14y15*y15 | 2465.20 | 106.436 | 2022  | 3 | 822.41  | -3.27  |
| O75083 WDR1_HUMAN WD repeat-containing protein 1 | 27 | Phosphoryl STY(11)    | NIDNPALADIYTEHAHQVVVAK                          | 43  | 22 | 3 | 13.43 | b7y11y13             | 2498.17 | 72.526  | 5702  | 3 | 833.39  | -12.61 |
| O75083 WDR1_HUMAN WD repeat-containing protein 1 | 28 | Oxidation+M(5)        | YTSMLLRDYSQGQVVK                                | 389 | 16 | 5 | 27.65 | b4b11b14y10°y10      | 1832.95 | 110.928 | 2810  | 3 | 611.65  | 14.92  |
| Q9UBW5 BIN2_HUMAN Bridging integrator 2          | 1  |                       | AQTVFEDLNQELLEELPILYNSR                         | 179 | 23 | 8 | 51.04 | b2*b2b10b11y3y4y5y7  | 2734.39 | 118.673 | 13446 | 3 | 912.13  | -2.32  |
| Q9UBW5 BIN2_HUMAN Bridging integrator 2          | 2  | Carbamidomethyl+C(14) | ENENIHNQNPEELCTSPMLTMSQV<br>ASEPGEAK            | 482 | 32 | 3 | 11.14 | b9y5y9               | 3554.64 | 58.757  | 3597  | 3 | 1185.55 | 12.16  |
| Q9UBW5 BIN2_HUMAN Bridging integrator 2          | 3  | Carbamidomethyl+C(3)  | IGCYVTIFQNISNLR                                 | 202 | 15 | 3 | 18.12 | b4b8y4               | 1797.93 | 91.463  | 19053 | 2 | 899.47  | 1.15   |
| Q9UBW5 BIN2_HUMAN Bridging integrator 2          | 4  |                       | AIVWNNDLLWEDYEEK                                | 100 | 16 | 4 | 17.15 | b7y11°y11y13         | 2036.97 | 87.858  | 17703 | 2 | 1018.99 | 4.85   |
| Q9UBW5 BIN2_HUMAN Bridging integrator 2          | 5  |                       | LNHNLYEVMSK                                     | 226 | 11 | 3 | 24.29 | b4y5y7               | 1347.68 | 75.542  | 15144 | 2 | 674.35  | 7.52   |
| Q9UBW5 BIN2_HUMAN Bridging integrator 2          | 6  |                       | ASLGTGTASPR                                     | 449 | 11 | 7 | 47.7  | b7b9°b9y6y8°y8y9     | 1017.52 | 26.790  | 10608 | 2 | 509.27  | -9.30  |
| Q9UBW5 BIN2_HUMAN Bridging integrator 2          | 7  |                       | ATASPRPSSGNIPSSPTASGGGSPT<br>SPR                | 421 | 28 | 4 | 11.7  | b4b9y14°y14          | 2581.28 | 90.492  | 8852  | 3 | 861.10  | 8.23   |
| Q9UBW5 BIN2_HUMAN Bridging integrator 2          | 8  |                       | FEQSASNFYQQQAEGHK                               | 42  | 17 | 4 | 26.13 | b5y3y6y16            | 1998.88 | 43.104  | 8420  | 3 | 666.97  | -5.01  |
| Q9UBW5 BIN2_HUMAN Bridging integrator 2          | 9  |                       | VSETLQEIYSSEWDGHEELK                            | 80  | 20 | 3 | 14.36 | b10b12y14            | 2379.14 | 70.321  | 3061  | 4 | 595.54  | 17.24  |
| Q9UBW5 BIN2_HUMAN Bridging integrator 2          | 10 |                       | TSLEVSPNPEPEKPVVR                               | 460 | 17 | 5 | 27.38 | b3b9b10°b10y11       | 1875.99 | 127.773 | 2294  | 2 | 938.50  | 7.09   |
| Q9UBW5 BIN2_HUMAN Bridging integrator 2          | 11 |                       | TASEGSEQPK                                      | 392 | 10 | 7 | 39.31 | b4b6y5°y5*y5y7°y7    | 1033.50 | 116.639 | 1755  | 1 | 1033.50 | 19.73  |
| Q9UBW5 BIN2_HUMAN Bridging integrator 2          | 12 |                       | TRTASEGSEQPK                                    | 390 | 12 | 4 | 22.26 | b10*b10y8y11         | 1290.64 | 48.985  | 99845 | 2 | 645.83  | 12.77  |
| Q9UBW5 BIN2_HUMAN Bridging integrator 2          | 13 |                       | TATVSSPLTSPSTLSLKSESES<br>VSATEDLAPDAAQGEDNSEIK | 267 | 46 | 4 | 11.61 | b14b16y11y14         | 4635.19 | 120.619 | 14723 | 4 | 1159.55 | -5.58  |
| Q9UBW5 BIN2_HUMAN Bridging integrator 2          | 14 |                       | LVDYDSARHHEAVQNAK                               | 145 | 18 | 3 | 15.57 | b9y7y13              | 2066.05 | 101.934 | 13955 | 3 | 689.36  | 5.08   |
| Q9UBW5 BIN2_HUMAN Bridging integrator 2          | 15 |                       | VMHESSKR                                        | 72  | 8  | 3 | 36.08 | b3b7y7               | 973.50  | 70.913  | 11849 | 2 | 487.25  | 11.41  |

|                                                      |    |                                         |                                                   |     |    |    |        |                                                     |         |         |        |   |         |        |
|------------------------------------------------------|----|-----------------------------------------|---------------------------------------------------|-----|----|----|--------|-----------------------------------------------------|---------|---------|--------|---|---------|--------|
| Q9UBW5 BIN2_HUMAN Bridging integrator 2              | 16 |                                         | RVSETLQEIYSSEWDGHEELK                             | 79  | 21 | 3  | 23.52  | y8y9y12                                             | 2535.16 | 69.156  | 6734   | 3 | 845.73  | -14.06 |
| Q9UBW5 BIN2_HUMAN Bridging integrator 2              | 17 | Carbamidomethyl+C(3)                    | IGCYVTIFQNISNLRDVFYR                              | 202 | 20 | 3  | 22.49  | b11b12y11                                           | 2478.27 | 112.656 | 2162   | 3 | 826.76  | 4.04   |
| Q9UBW5 BIN2_HUMAN Bridging integrator 2              | 18 | Carbamidomethyl+C(3); Phosphoryl STY(6) | IGCYVTIFQNISNLRDVFYR                              | 202 | 20 | 4  | 19.74  | b5b12_H3PO4<br>b12y10y13                            | 2558.22 | 66.658  | 34643  | 3 | 853.41  | 0.57   |
| Q9UBW5 BIN2_HUMAN Bridging integrator 2              | 19 | Phosphoryl STY(5)                       | SLVISPPVR                                         | 258 | 9  | 3  | 30.47  | b6b8y3                                              | 1047.56 | 42.219  | 6146   | 2 | 524.28  | 9.79   |
| Q9UBW5 BIN2_HUMAN Bridging integrator 2              | 20 | Phosphoryl STY()                        | ATASPRPSSGNIPSSPTASGGGSPT<br>SPR                  | 421 | 28 | 6  | 26.42  | b15y8_H3PO4<br>y8*y8y12y13y18                       | 2661.18 | 121.671 | 3225   | 3 | 887.73  | -12.75 |
| Q9UBW5 BIN2_HUMAN Bridging integrator 2              | 21 | Phosphoryl STY(9)                       | TATVSSPLTSPSTLSLK                                 | 267 | 20 | 4  | 25.23  | b8b9b13y13                                          | 2055.00 | 112.183 | 2026   | 3 | 685.67  | -9.39  |
| Q9UBW5 BIN2_HUMAN Bridging integrator 2              | 22 | Oxidation+M(9)                          | LNHNLYEVMSK                                       | 226 | 11 | 4  | 24.29  | b8y5*y5y7                                           | 1363.65 | 62.984  | 3593   | 3 | 455.22  | -10.65 |
| P07195 LDHB_HUMAN L-lactate dehydrogenase B chain    | 1  | Carbamidomethyl+C(6)                    | VIGSGCNLDSAR                                      | 158 | 12 | 11 | 108.54 | b2y1y3y5y6y7y8y9y10y<br>11y12                       | 1248.60 | 36.173  | 68481  | 2 | 624.80  | -0.49  |
| P07195 LDHB_HUMAN L-lactate dehydrogenase B chain    | 2  |                                         | IVADKDYSVTANSK                                    | 77  | 14 | 9  | 75.8   | b2b4y3y7y8*y8y9y10y1<br>2                           | 1510.77 | 32.673  | 57769  | 3 | 504.26  | -6.30  |
| P07195 LDHB_HUMAN L-lactate dehydrogenase B chain    | 3  |                                         | LIAPVAEEEEATVPNNK                                 | 7   | 16 | 4  | 17.15  | b2b3y4y14                                           | 1694.90 | 53.005  | 25486  | 2 | 847.95  | 3.53   |
| P07195 LDHB_HUMAN L-lactate dehydrogenase B chain    | 4  |                                         | SLADELALVDVLEDK                                   | 43  | 15 | 6  | 18.12  | b7y2y4y6*y6y15                                      | 1629.86 | 98.412  | 24725  | 2 | 815.43  | -0.45  |
| P07195 LDHB_HUMAN L-lactate dehydrogenase B chain    | 5  |                                         | SADTLWDIQKDLKDL                                   | 319 | 15 | 4  | 18.12  | b3b13y14*y14                                        | 1760.89 | 80.221  | 3349   | 3 | 587.64  | -8.39  |
| P07195 LDHB_HUMAN L-lactate dehydrogenase B chain    | 6  |                                         | GEMMDLQHGSFLQTPK                                  | 60  | 17 | 4  | 16.3   | b12*b12b15y15                                       | 1931.90 | 73.788  | 111033 | 3 | 644.64  | -19.71 |
| P07195 LDHB_HUMAN L-lactate dehydrogenase B chain    | 7  |                                         | GLTSVINQK                                         | 299 | 9  | 3  | 38.25  | y4y5y7                                              | 959.55  | 44.877  | 36493  | 2 | 480.28  | -5.41  |
| P07195 LDHB_HUMAN L-lactate dehydrogenase B chain    | 8  | Carbamidomethyl+C(15)                   | GMYGIENEVFLSLPCILNAR                              | 279 | 20 | 6  | 23.78  | b6b10*b10b11*b11*b11                                | 2296.14 | 109.444 | 21230  | 2 | 1148.57 | -2.23  |
| O95810 SDPR_HUMAN Serum deprivation-response protein | 1  |                                         | VLIFQEENEIPASVFK                                  | 156 | 17 | 17 | 130.85 | b1b2b3b4b8b9b10b12b<br>14*b14y3y4y7y12y13y1<br>4y17 | 1962.06 | 89.275  | 147851 | 2 | 981.53  | 1.56   |
| O95810 SDPR_HUMAN Serum deprivation-response protein | 2  |                                         | LVNMLDAVQENQHK                                    | 64  | 14 | 7  | 44.74  | y2y5*y5y7y9y11y14                                   | 1638.81 | 59.825  | 67332  | 3 | 546.94  | -9.16  |
| O95810 SDPR_HUMAN Serum deprivation-response protein | 3  |                                         | YQASTSNTVSK                                       | 102 | 11 | 11 | 66.94  | b2*b2b3b4y2y3y7y8y9*<br>y9y11                       | 1185.57 | 19.813  | 17981  | 2 | 593.29  | -5.25  |
| O95810 SDPR_HUMAN Serum deprivation-response protein | 4  |                                         | QPVSGAVEGK                                        | 173 | 10 | 6  | 51.87  | y2y3*y3y5y6y7                                       | 971.51  | 22.972  | 14983  | 2 | 486.26  | -7.10  |
| O95810 SDPR_HUMAN Serum deprivation-response protein | 5  |                                         | SDGDPVQPAVLQVHQTS                                 | 408 | 17 | 3  | 16.3   | b7b12y3                                             | 1777.85 | 49.272  | 2546   | 2 | 889.43  | -11.74 |
| O95810 SDPR_HUMAN Serum deprivation-response protein | 6  |                                         | VSPLTFGR                                          | 291 | 8  | 3  | 40.85  | y4y5y6                                              | 876.48  | 55.553  | 19123  | 2 | 438.74  | -15.25 |
| O95810 SDPR_HUMAN Serum deprivation-response protein | 7  |                                         | FQHPSGSDMR                                        | 10  | 9  | 4  | 30.47  | b3b4*b4y5                                           | 1074.50 | 64.833  | 12494  | 2 | 537.75  | 16.59  |
| O95810 SDPR_HUMAN Serum deprivation-response protein | 8  |                                         | YEGSYALTSEEAEER                                   | 394 | 14 | 7  | 45.24  | b3*b3b4y3y7y12*y12                                  | 1604.67 | 48.996  | 11673  | 2 | 802.84  | -20.54 |
| O95810 SDPR_HUMAN Serum deprivation-response protein | 9  |                                         | GEDAAQAEK                                         | 1   | 9  | 3  | 30.47  | b6b7y8                                              | 918.42  | 32.066  | 5809   | 1 | 918.42  | -1.13  |
| O95810 SDPR_HUMAN Serum deprivation-response protein | 10 |                                         | VSAHTR                                            | 120 | 6  | 6  | 53.26  | b3*b3b4*b4b5y3                                      | 670.37  | 80.324  | 3802   | 1 | 670.37  | 11.20  |
| O95810 SDPR_HUMAN Serum deprivation-response protein | 11 |                                         | SEDLPSSSEQMPNDQEEESFAEGHS<br>EASLASALVEGEIAEEAAEK | 314 | 44 | 4  | 13.83  | b13y3y10y13                                         | 4677.05 | 87.964  | 3658   | 3 | 1559.69 | 2.09   |
| O95810 SDPR_HUMAN Serum deprivation-response protein | 12 |                                         | LENNHAQLLR                                        | 141 | 10 | 5  | 33.88  | b3*b3b6*b6b7                                        | 1207.67 | 73.637  | 3209   | 3 | 403.23  | 10.51  |
| O95810 SDPR_HUMAN Serum deprivation-response protein | 13 |                                         | IVSVER                                            | 261 | 6  | 1  | 13.62  | y4                                                  | 702.42  | 52.671  | 1708   | 2 | 351.71  | 8.95   |

|                                                      |    |                                                                          |                                 |     |    |    |       |                                  |         |         |        |   |         |        |
|------------------------------------------------------|----|--------------------------------------------------------------------------|---------------------------------|-----|----|----|-------|----------------------------------|---------|---------|--------|---|---------|--------|
| O95810 SDPR_HUMAN Serum deprivation-response protein | 14 |                                                                          | VREGESHAENETK                   | 301 | 13 | 9  | 66.19 | b3b4b9y4*y4y6y9*y9y10            | 1485.68 | 33.600  | 12467  | 2 | 743.34  | -9.04  |
| O95810 SDPR_HUMAN Serum deprivation-response protein | 15 |                                                                          | VRYESYALTSEEAEER                | 392 | 16 | 4  | 25.52 | y5y13*y13y14                     | 1859.87 | 68.420  | 8549   | 2 | 930.44  | -4.59  |
| O95810 SDPR_HUMAN Serum deprivation-response protein | 16 |                                                                          | QPVSGAVEGKEELPDENK              | 173 | 18 | 4  | 24.8  | b13y4y10y15                      | 1925.94 | 77.338  | 1578   | 2 | 963.47  | -1.46  |
| O95810 SDPR_HUMAN Serum deprivation-response protein | 17 | Phosphoryl STY(4)                                                        | QPVSGAVEGKEELPDENK              | 173 | 18 | 5  | 29.13 | b3b16*b16y16y17                  | 2005.90 | 81.321  | 3084   | 4 | 502.23  | -1.28  |
| O95810 SDPR_HUMAN Serum deprivation-response protein | 18 |                                                                          | LVNMLDAVQENQ                    | 64  | 12 | 0  | 3.64  |                                  | 1373.65 | 59.821  | 3309   | 3 | 458.56  | -13.69 |
| O95810 SDPR_HUMAN Serum deprivation-response protein | 19 |                                                                          | QPVSGAVEGK                      | 173 | 10 | 0  | 2.02  |                                  | 954.50  | 22.994  | 3493   | 2 | 477.75  | 11.89  |
| P00558 PGK1_HUMAN Phosphoglycerate kinase 1          | 1  | Carbamidomethyl+C(2)                                                     | ACANPAAGSVILLENLR               | 106 | 17 | 9  | 33.98 | b2b3b8y1y4*y4y5y13y17            | 1768.94 | 83.601  | 44194  | 2 | 884.97  | 2.00   |
| P00558 PGK1_HUMAN Phosphoglycerate kinase 1          | 2  |                                                                          | LGDVYVNDAFGTAHR                 | 156 | 15 | 8  | 57.55 | b3b4b5b9*b9y10y11y15             | 1634.78 | 58.279  | 39291  | 3 | 545.60  | -7.84  |
| P00558 PGK1_HUMAN Phosphoglycerate kinase 1          | 3  |                                                                          | SVVLSMHLGRPDGVMPMDK             | 56  | 19 | 6  | 42.87 | b7y5y6y10y11*y11                 | 2035.02 | 71.963  | 202648 | 3 | 679.01  | -15.36 |
| P00558 PGK1_HUMAN Phosphoglycerate kinase 1          | 4  |                                                                          | ALESPERPFLAILGGAK               | 199 | 17 | 3  | 16.3  | b11y4y15                         | 1768.98 | 84.098  | 49513  | 3 | 590.33  | -10.42 |
| P00558 PGK1_HUMAN Phosphoglycerate kinase 1          | 5  |                                                                          | VSHVSTGGGASLELLEGGK             | 388 | 18 | 3  | 15.57 | b6b9y13                          | 1740.91 | 69.063  | 11555  | 3 | 580.98  | -1.26  |
| P00558 PGK1_HUMAN Phosphoglycerate kinase 1          | 6  | Carbamidomethyl+C(2);<br>Carbamidomethyl+C(14);<br>Carbamidomethyl+C(15) | GCITIIIGGDTATCCA                | 365 | 17 | 3  | 23.29 | b12b13y11                        | 1754.81 | 52.094  | 10532  | 2 | 877.91  | 14.26  |
| P00558 PGK1_HUMAN Phosphoglycerate kinase 1          | 7  |                                                                          | AHSSMVGVNLPQK                   | 171 | 13 | 5  | 34.05 | b4b6b8y11*y11                    | 1367.69 | 98.383  | 5191   | 2 | 684.35  | -11.69 |
| P00558 PGK1_HUMAN Phosphoglycerate kinase 1          | 8  |                                                                          | VLNNMEIGTSLFDEEGAK              | 246 | 18 | 11 | 60.81 | b8*b8b11b12*b12y8*y8y9y11y12*y12 | 1966.92 | 87.391  | 4208   | 2 | 983.96  | -12.04 |
| P00558 PGK1_HUMAN Phosphoglycerate kinase 1          | 9  |                                                                          | ITLPVDFVTADKFDENAK              | 279 | 18 | 7  | 59.28 | y4y10y11y12y15y16*y16            | 2023.02 | 80.537  | 56920  | 3 | 675.01  | -9.90  |
| P00558 PGK1_HUMAN Phosphoglycerate kinase 1          | 10 | Carbamidomethyl+C(19)                                                    | TGQATVASGIPAGWMGLDCGPES<br>SKK  | 297 | 26 | 4  | 22.79 | b5y6y16y17                       | 2605.25 | 71.345  | 29734  | 3 | 869.09  | 4.87   |
| P00558 PGK1_HUMAN Phosphoglycerate kinase 1          | 11 |                                                                          | VDFNVPMKNNQITNNQR               | 22  | 17 | 3  | 23.29 | b4b5y5                           | 2031.99 | 52.942  | 12284  | 3 | 678.00  | -6.91  |
| P00558 PGK1_HUMAN Phosphoglycerate kinase 1          | 12 | Carbamidomethyl+C(2)                                                     | FCLDNGAKSVVLSMHLGRPDGVP<br>MPDK | 48  | 27 | 5  | 22.54 | b5*b5b8b9y3                      | 2940.45 | 110.086 | 5169   | 3 | 980.82  | -1.25  |
| P00558 PGK1_HUMAN Phosphoglycerate kinase 1          | 13 | Carbamidomethyl+C(2)                                                     | ACANPAAGSVILLENLRFHVEE<br>GK    | 106 | 25 | 4  | 23.08 | b7b11b12y13                      | 2724.34 | 97.273  | 2439   | 2 | 1362.68 | -12.64 |
| P00558 PGK1_HUMAN Phosphoglycerate kinase 1          | 14 | Oxidation+M(16)                                                          | SVVLSMHLGRPDGVMPMDK             | 56  | 19 | 5  | 28.46 | b6b7y12*y12y17                   | 2051.03 | 47.215  | 11661  | 3 | 684.35  | -5.12  |
| P13645 K1C10_HUMAN Keratin                           | 1  |                                                                          | SQYEQLAEQNRK                    | 322 | 12 | 7  | 40.25 | b2b6*b10y6y7y8y12                | 1493.73 | 30.677  | 33007  | 3 | 498.58  | -4.74  |
| P13645 K1C10_HUMAN Keratin                           | 2  |                                                                          | KDAEAWFNEK                      | 333 | 10 | 6  | 41.07 | b5b7*b7y4y5y10                   | 1237.57 | 51.754  | 25579  | 2 | 619.29  | -10.36 |
| P13645 K1C10_HUMAN Keratin                           | 3  | Carbamidomethyl+C(2)                                                     | YCVQLSQIAQISALEEQQQIR           | 399 | 23 | 12 | 76.02 | b2b3b5b8b12b22y4y5y8y9y11y23     | 2746.42 | 112.569 | 14981  | 3 | 916.15  | 2.04   |
| P13645 K1C10_HUMAN Keratin                           | 4  |                                                                          | SKELTTEIDNNEIQISSYK             | 343 | 19 | 3  | 14.93 | b9b13y14                         | 2212.10 | 78.035  | 6365   | 2 | 1106.55 | 0.33   |
| P13645 K1C10_HUMAN Keratin                           | 5  | Carbamidomethyl+C(7)                                                     | GSSGGGCFGGSSGGYGGGFGG<br>GSFR   | 59  | 27 | 4  | 21.9  | b6y4*y4y5                        | 2343.01 | 58.168  | 3262   | 2 | 1172.01 | 9.90   |
| P13645 K1C10_HUMAN Keratin                           | 6  |                                                                          | ALEESNYELEGK                    | 165 | 12 | 3  | 26.24 | b9y4y5                           | 1381.65 | 44.076  | 23852  | 2 | 691.33  | 1.86   |
| P13645 K1C10_HUMAN Keratin                           | 7  |                                                                          | LENEIQTYR                       | 441 | 9  | 4  | 38.25 | y5y6y7*y7                        | 1165.59 | 40.516  | 21514  | 2 | 583.30  | 0.52   |
| P13645 K1C10_HUMAN Keratin                           | 8  |                                                                          | VTMQNLNDR                       | 147 | 9  | 3  | 30.47 | b7y7y8                           | 1090.54 | 36.180  | 19617  | 2 | 545.77  | 4.70   |
| P13645 K1C10_HUMAN Keratin                           | 9  |                                                                          | LASYLDK                         | 156 | 7  | 4  | 37.44 | b6*b6y4y5                        | 809.43  | 38.376  | 18970  | 2 | 405.22  | -12.29 |
| P13645 K1C10_HUMAN Keratin                           | 10 |                                                                          | GSLGGGFSSGGFSSGGFSSFR           | 40  | 19 | 6  | 29.39 | b3*b3b7b15y9y13                  | 1707.80 | 69.693  | 8143   | 2 | 854.41  | 18.23  |
| P13645 K1C10_HUMAN Keratin                           | 11 | Carbamidomethyl+C(5)                                                     | AETECQNTHEYQQLLDIK              | 422 | 17 | 4  | 34.5  | y8y9y10*y10                      | 2082.99 | 112.285 | 5348   | 3 | 695.00  | 11.13  |
| P13645 K1C10_HUMAN Keratin                           | 12 |                                                                          | YSSSK                           | 4   | 5  | 2  | 26.43 | y3y4                             | 571.27  | 25.438  | 4275   | 1 | 571.27  | 4.17   |

|                                                     |    |                       |                                 |     |    |    |       |                                           |         |         |        |   |         |        |
|-----------------------------------------------------|----|-----------------------|---------------------------------|-----|----|----|-------|-------------------------------------------|---------|---------|--------|---|---------|--------|
| P13645 K1C10_HUMAN Keratin                          | 13 |                       | NVSTGDVNVEMNAAPGVDLTQL<br>LNNMR | 295 | 27 | 4  | 22.54 | b14y3y4y13                                | 2872.41 | 98.978  | 2836   | 3 | 958.14  | 5.44   |
| P13645 K1C10_HUMAN Keratin                          | 14 |                       | SQYEQLAEQNR                     | 322 | 11 | 8  | 38.29 | b3°b3*b3b10y5y6°y6*y<br>6                 | 1365.64 | 74.869  | 2347   | 2 | 683.32  | 1.52   |
| P13645 K1C10_HUMAN Keratin                          | 15 |                       | SSSSSGVGESSSK                   | 576 | 13 | 3  | 20.63 | b4y3y7                                    | 1185.54 | 136.392 | 1684   | 1 | 1185.54 | 16.78  |
| P13645 K1C10_HUMAN Keratin                          | 16 |                       | ELTTEIDNNEIQISSYK               | 345 | 17 | 3  | 23.29 | b10b11y11                                 | 1997.00 | 112.988 | 1639   | 2 | 999.00  | 15.22  |
| P13645 K1C10_HUMAN Keratin                          | 17 |                       | ADLEMQIESLTELAYLKK              | 266 | 19 | 3  | 14.93 | b4y3y15                                   | 2224.13 | 102.139 | 17027  | 3 | 742.05  | -6.59  |
| P13645 K1C10_HUMAN Keratin                          | 18 |                       | KDAEAWFNEK                      | 333 | 10 | 5  | 26.89 | b7°b7y6y8*y8                              | 1237.60 | 69.686  | 8489   | 3 | 413.21  | 14.80  |
| P13645 K1C10_HUMAN Keratin                          | 19 |                       | LENIQTYRSLLEGGSSGGGGR           | 441 | 23 | 3  | 23.13 | y7y16y17                                  | 2409.17 | 81.504  | 5513   | 2 | 1205.09 | 4.26   |
| P13645 K1C10_HUMAN Keratin                          | 20 |                       | EWYEKHGNSHQGEPR                 | 179 | 15 | 4  | 26.21 | y11°y11y13y14                             | 1853.83 | 82.072  | 3292   | 2 | 927.42  | -1.12  |
| P13645 K1C10_HUMAN Keratin                          | 21 |                       | ISSKGLSLGGGFSSGGFSSGFSR         | 35  | 24 | 5  | 35.45 | b19y17y18°y18y19                          | 2210.04 | 81.382  | 3117   | 3 | 737.35  | -2.32  |
| P13645 K1C10_HUMAN Keratin                          | 22 |                       | HGNSHQGEPRDYSK                  | 184 | 14 | 3  | 27.84 | y3y6y13                                   | 1611.73 | 80.329  | 3070   | 3 | 537.91  | 0.38   |
| P13645 K1C10_HUMAN Keratin                          | 23 | Carbamidomethyl+C(16) | HYSSSRSGGGGGGGGGGGV<br>SSLR     | 9   | 26 | 4  | 18.27 | b6y3y12y16                                | 2267.01 | 90.719  | 2704   | 3 | 756.34  | 5.06   |
| P13645 K1C10_HUMAN Keratin                          | 24 |                       | SSSSSGVGESSSKGPR                | 576 | 16 | 4  | 24.24 | b13b15y9y14                               | 1495.70 | 54.287  | 2370   | 2 | 748.35  | 0.57   |
| P13645 K1C10_HUMAN Keratin                          | 25 | Carbamidomethyl+C(10) | SGGGGGGGGGGGGGVSSLRIS<br>SK     | 15  | 25 | 4  | 12.4  | b3°b3y16y20                               | 2051.93 | 71.089  | 1971   | 2 | 1026.47 | -12.73 |
| P13645 K1C10_HUMAN Keratin                          | 26 | Oxidation+M(5)        | ADLEMQIESLTELAYLKK              | 266 | 19 | 3  | 14.93 | b5b7y3                                    | 2240.11 | 103.787 | 3771   | 3 | 747.38  | -10.24 |
| P13645 K1C10_HUMAN Keratin                          | 27 |                       | SKELTTEIDNNEIQISSY              | 343 | 18 | 1  | 7.42  | y9                                        | 2083.99 | 78.026  | 1921   | 2 | 1042.50 | -6.44  |
| P11021 GRP78_HUMAN 78 kDa glucose-regulated protein | 1  |                       | VEIANDQGNR                      | 49  | 11 | 14 | 98.13 | b2b3b10y3y4*y4y6*y6y<br>7y8y10°y10*y10y11 | 1228.62 | 36.699  | 60296  | 2 | 614.82  | -2.68  |
| P11021 GRP78_HUMAN 78 kDa glucose-regulated protein | 2  |                       | VTHAVVTVPAYFNDAQR               | 164 | 17 | 3  | 24.96 | y9y10y12                                  | 1887.96 | 60.760  | 10426  | 3 | 629.99  | -5.37  |
| P11021 GRP78_HUMAN 78 kDa glucose-regulated protein | 3  |                       | VLEDSLK                         | 344 | 9  | 3  | 30.47 | b4y5y7                                    | 1046.56 | 28.156  | 3240   | 2 | 523.78  | -14.70 |
| P11021 GRP78_HUMAN 78 kDa glucose-regulated protein | 4  |                       | LYGSAGPPPTGEETAEK               | 633 | 18 | 3  | 22.97 | b13b14y10                                 | 1818.84 | 57.042  | 2892   | 2 | 909.93  | 2.42   |
| P11021 GRP78_HUMAN 78 kDa glucose-regulated protein | 5  |                       | IEWLESHQDADIEDFK                | 601 | 16 | 5  | 34.74 | b10b13y4y8y15                             | 1974.90 | 69.661  | 20950  | 3 | 658.97  | -2.53  |
| P11021 GRP78_HUMAN 78 kDa glucose-regulated protein | 6  |                       | SQIFSTASDNQPTVTIK               | 447 | 17 | 4  | 26.13 | b3b5b14y12                                | 1836.93 | 58.182  | 15989  | 2 | 918.97  | -2.86  |
| P11021 GRP78_HUMAN 78 kDa glucose-regulated protein | 7  |                       | TWNDPSVQQDIK                    | 101 | 12 | 3  | 22.26 | b10y8y10                                  | 1430.70 | 49.225  | 12868  | 2 | 715.85  | 3.67   |
| P11021 GRP78_HUMAN 78 kDa glucose-regulated protein | 8  |                       | SDIDEIVLVGGSTR                  | 353 | 14 | 7  | 50.67 | b3°b3b5b6b10y5y7                          | 1460.73 | 110.058 | 12657  | 2 | 730.87  | -16.88 |
| P11021 GRP78_HUMAN 78 kDa glucose-regulated protein | 9  |                       | DAGTIAGLNVMR                    | 185 | 12 | 5  | 34.22 | b7y3y4y7*y7                               | 1217.63 | 63.726  | 9253   | 2 | 609.32  | -2.81  |
| P11021 GRP78_HUMAN 78 kDa glucose-regulated protein | 10 |                       | NELESYAYSLK                     | 562 | 11 | 4  | 38.29 | b6b7y6y8                                  | 1316.64 | 57.188  | 5467   | 3 | 439.55  | 1.76   |
| P11021 GRP78_HUMAN 78 kDa glucose-regulated protein | 11 |                       | IDTR                            | 558 | 4  | 1  | 12.81 | y3                                        | 504.28  | 71.383  | 4914   | 1 | 504.28  | 5.27   |
| P11021 GRP78_HUMAN 78 kDa glucose-regulated protein | 12 |                       | FEELNMDLFR                      | 326 | 10 | 4  | 39.31 | b3b5y5y7                                  | 1313.63 | 136.290 | 3343   | 1 | 1313.63 | 4.65   |
| P11021 GRP78_HUMAN 78 kDa glucose-regulated protein | 13 | Carbamidomethyl+C(17) | EDVGTVVGIDLGTTYSCVGVFK          | 24  | 22 | 10 | 44.02 | b7°b7b10y3y7y11°y11y<br>13y14°y14         | 2316.10 | 116.652 | 1538   | 3 | 772.70  | -19.82 |
| P11021 GRP78_HUMAN 78 kDa glucose-regulated protein | 14 |                       | VEIANDQGNRITPSYVAFTPEGER        | 49  | 25 | 5  | 27.18 | y3y13y15y21°y21                           | 2776.39 | 91.624  | 236688 | 3 | 926.13  | -1.76  |
| P11021 GRP78_HUMAN 78 kDa glucose-regulated protein | 15 |                       | ETMEKAVEEK                      | 591 | 10 | 9  | 55.54 | b7°b7b8°b8b9°b9y4°y4y<br>7                | 1193.55 | 33.588  | 22704  | 2 | 597.28  | -14.11 |
| P11021 GRP78_HUMAN 78 kDa glucose-regulated protein | 16 |                       | TWNDPSVQQDIKFLPFK               | 101 | 17 | 3  | 16.3  | b10b12y4                                  | 2063.06 | 97.477  | 14109  | 3 | 688.36  | 0.59   |
| P11021 GRP78_HUMAN 78 kDa glucose-regulated protein | 17 |                       | ALSSQHARIEIESFYEGEDFSETL<br>TR  | 297 | 27 | 3  | 11.9  | b8y8y10                                   | 3143.52 | 107.728 | 10695  | 4 | 786.64  | 8.54   |
| P11021 GRP78_HUMAN 78 kDa glucose-regulated protein | 18 |                       | IDTRNELESYAYSLK                 | 558 | 15 | 3  | 18.12 | b10y3y9                                   | 1801.89 | 69.538  | 7602   | 2 | 901.45  | -1.96  |
| P11021 GRP78_HUMAN 78 kDa glucose-regulated protein | 19 |                       | IEWLESHQDADIEDFKAK              | 601 | 18 | 3  | 15.57 | b9y6y13                                   | 2174.04 | 63.849  | 5921   | 3 | 725.35  | -1.46  |



|                                                          |    |                                            |                                |     |    |    |       |                                       |         |         |        |   |         |        |
|----------------------------------------------------------|----|--------------------------------------------|--------------------------------|-----|----|----|-------|---------------------------------------|---------|---------|--------|---|---------|--------|
| P11021 GRP78_HUMAN 78 kDa glucose-regulated protein      | 20 |                                            | IEIESFYEGEDFSETLTRAK           | 306 | 20 | 5  | 27.98 | b7b10y11y13y19                        | 2364.12 | 82.062  | 5239   | 2 | 1182.56 | -3.20  |
| P11021 GRP78_HUMAN 78 kDa glucose-regulated protein      | 21 |                                            | ITITNDQNRLTPEEIER              | 523 | 17 | 5  | 33.98 | b9b14y5y7y8                           | 2042.07 | 62.947  | 4038   | 3 | 681.36  | 9.15   |
| P11021 GRP78_HUMAN 78 kDa glucose-regulated protein      | 22 | Phosphoryl STY(8)                          | GVPQIEVTFEIDVNGILR             | 492 | 18 | 3  | 15.57 | b6b10y12                              | 2079.03 | 77.929  | 12897  | 3 | 693.68  | -5.87  |
| P11021 GRP78_HUMAN 78 kDa glucose-regulated protein      | 23 | Phosphoryl STY(9)                          | ITPSYVAFTPEGER                 | 60  | 14 | 7  | 60.37 | b5°b5b10b11b12b13y4                   | 1646.75 | 46.150  | 4424   | 2 | 823.88  | 8.15   |
| P11021 GRP78_HUMAN 78 kDa glucose-regulated protein      | 24 | Carbamidomethyl+C(17);Phosphoryl STY(15)   | EDVGTVVGDILGTTYSCVGVFK         | 24  | 22 | 10 | 44.02 | b3°b3b7°b7b8b14°b14b16y7y15_H3PO4 y15 | 2396.11 | 100.030 | 3347   | 3 | 799.38  | 4.48   |
| P11021 GRP78_HUMAN 78 kDa glucose-regulated protein      | 25 | Phosphoryl STY(11)                         | VTHAVVTPAYFNDAQR               | 164 | 17 | 3  | 16.3  | b12y6y10                              | 1967.94 | 59.079  | 2213   | 4 | 492.74  | 5.02   |
| P17066 HSP76_HUMAN Heat shock 70 kDa protein 6           | 1  |                                            | TTPSYVAFTDTER                  | 38  | 13 | 10 | 67.47 | b1b5°b5y3y4°y4y6y9y11y13              | 1487.70 | 55.395  | 55293  | 2 | 744.36  | 1.15   |
| P17066 HSP76_HUMAN Heat shock 70 kDa protein 6           | 2  |                                            | LLQDFFNKG                      | 350 | 9  | 7  | 44.93 | b2b5b6°b8y3y4*y4                      | 1081.56 | 71.308  | 41350  | 2 | 541.28  | -7.79  |
| P17066 HSP76_HUMAN Heat shock 70 kDa protein 6           | 3  |                                            | ATAGDTHLGGEDFDNR               | 222 | 16 | 4  | 17.15 | b6°b6b12y11                           | 1675.71 | 41.886  | 2085   | 3 | 559.24  | -11.36 |
| P17066 HSP76_HUMAN Heat shock 70 kDa protein 6           | 4  |                                            | NSLEAHVFHVK                    | 541 | 11 | 3  | 24.29 | b3b8y10                               | 1280.69 | 74.257  | 103660 | 2 | 640.85  | 12.87  |
| P17066 HSP76_HUMAN Heat shock 70 kDa protein 6           | 5  |                                            | QGDPSTGPIIEEVD                 | 629 | 14 | 4  | 19.27 | b4°b4y3y8                             | 1456.71 | 52.837  | 31165  | 2 | 728.86  | 17.01  |
| P17066 HSP76_HUMAN Heat shock 70 kDa protein 6           | 6  | Carbamidomethyl+C(19)                      | MQAPRELAVGIDLGTTYSCVGVFQQGR    | 0   | 27 | 6  | 17.77 | b10b13b19y13°y13*y13                  | 2953.45 | 105.878 | 36570  | 4 | 739.12  | -4.13  |
| P17066 HSP76_HUMAN Heat shock 70 kDa protein 6           | 7  |                                            | MVHEAEQYKAEDEAQR               | 519 | 16 | 7  | 28.32 | b8b9°b9b11°b11y10°y10                 | 1933.86 | 46.206  | 16362  | 3 | 645.29  | -8.08  |
| P17066 HSP76_HUMAN Heat shock 70 kDa protein 6           | 8  | Carbamidomethyl+C(6);Carbamidomethyl+C(25) | ELEQICRPIFSRLYGGPGVPGGSSCGTQAR | 599 | 30 | 5  | 16.51 | b6°b6y3y16y19                         | 3249.56 | 80.340  | 11868  | 3 | 1083.86 | -7.66  |
| P17066 HSP76_HUMAN Heat shock 70 kDa protein 6           | 9  |                                            | GEDKTFYPEEISSMVLK              | 110 | 18 | 4  | 36.56 | b6b7b8y7                              | 2060.00 | 61.255  | 7202   | 2 | 1030.51 | 7.35   |
| P17066 HSP76_HUMAN Heat shock 70 kDa protein 6           | 10 |                                            | DAGAIAGLNVLRIINEPTAAAIAYGLDR   | 161 | 28 | 3  | 22.72 | y4y5y13                               | 2838.52 | 120.123 | 1887   | 3 | 946.84  | -10.67 |
| Q96TA2 YME1L1_HUMAN ATP-dependent metalloprotease YME1L1 | 1  |                                            | AAVDGKEMVTMK                   | 556 | 12 | 7  | 85.33 | b3b6b9y3y6y9y11                       | 1279.65 | 43.025  | 10214  | 2 | 640.33  | 6.11   |
| Q96TA2 YME1L1_HUMAN ATP-dependent metalloprotease YME1L1 | 2  | Carbamidomethyl+C(13)                      | DVVPEHEAPSSCEMFSDFLTK          | 44  | 21 | 4  | 13.86 | b13y12y14°y14                         | 2425.03 | 74.827  | 1812   | 5 | 485.81  | -14.50 |
| Q96TA2 YME1L1_HUMAN ATP-dependent metalloprotease YME1L1 | 3  |                                            | TITAYHESGHAIAYYTK              | 593 | 18 | 7  | 32.72 | b11°b11b14y3y4°y4y13                  | 2039.02 | 112.230 | 55472  | 3 | 680.35  | -0.18  |
| Q96TA2 YME1L1_HUMAN ATP-dependent metalloprotease YME1L1 | 4  |                                            | NIPEAHQDAFK                    | 258 | 11 | 4  | 36.71 | b4b5b10y6                             | 1269.62 | 37.915  | 38040  | 3 | 423.88  | -4.62  |
| Q96TA2 YME1L1_HUMAN ATP-dependent metalloprotease YME1L1 | 5  |                                            | VAEELIFGTDHITGASSDFDNATK       | 658 | 25 | 10 | 56.69 | b3°b3b4b5°b5b12b15y5y8y9              | 2639.25 | 101.224 | 13519  | 3 | 880.42  | 2.31   |
| Q96TA2 YME1L1_HUMAN ATP-dependent metalloprotease YME1L1 | 6  | Carbamidomethyl+C(16)                      | IGQIDQLVENLLPGFCK              | 127 | 17 | 7  | 55.47 | b3b5y3y4y6y9y12                       | 1944.00 | 48.234  | 9211   | 2 | 972.50  | -15.76 |
| Q96TA2 YME1L1_HUMAN ATP-dependent metalloprotease YME1L1 | 7  |                                            | NISSHWHTSHVSAQSFFENK           | 146 | 20 | 3  | 22.49 | b11b12y3                              | 2343.12 | 64.974  | 8663   | 3 | 781.71  | 11.15  |
| Q96TA2 YME1L1_HUMAN ATP-dependent metalloprotease YME1L1 | 8  |                                            | NLAEALLTYETLDAK                | 744 | 15 | 3  | 26.21 | y4y9y10                               | 1664.86 | 64.443  | 6313   | 2 | 832.93  | -9.02  |

|                                                          |    |                                                                                                    |                                           |     |    |    |        |                                     |         |         |       |   |         |        |
|----------------------------------------------------------|----|----------------------------------------------------------------------------------------------------|-------------------------------------------|-----|----|----|--------|-------------------------------------|---------|---------|-------|---|---------|--------|
| Q96TA2 YME1L1_HUMAN ATP-dependent metalloprotease YME1L1 | 9  |                                                                                                    | IESPMHPYSR                                | 447 | 10 | 5  | 40.11  | b8°b8y6y7y9                         | 1216.56 | 31.974  | 5175  | 3 | 406.19  | -15.95 |
| Q96TA2 YME1L1_HUMAN ATP-dependent metalloprotease YME1L1 | 10 |                                                                                                    | AVAGEADVPFYYASGSEFDEMFMV<br>GVGASR        | 390 | 29 | 11 | 40.67  | b7°b7b9b11b12b16°b16<br>y4y6y10°y10 | 3028.41 | 103.707 | 3365  | 2 | 1514.71 | 15.72  |
| Q96TA2 YME1L1_HUMAN ATP-dependent metalloprotease YME1L1 | 11 | Carbamidomethyl+C(5)                                                                               | ANAPCVIFIDELDSVGGK                        | 428 | 18 | 6  | 49.81  | b9b11y6y7y13y14                     | 1904.98 | 110.004 | 2088  | 2 | 952.99  | 19.35  |
| Q96TA2 YME1L1_HUMAN ATP-dependent metalloprotease YME1L1 | 12 | Carbamidomethyl+C(8)                                                                               | EAKANAPCVIFIDELDSVGGK                     | 425 | 21 | 6  | 30     | b4b5°b5b9b14°b14                    | 2233.12 | 77.353  | 51012 | 3 | 745.05  | 3.28   |
| Q96TA2 YME1L1_HUMAN ATP-dependent metalloprotease YME1L1 | 13 |                                                                                                    | GKNISHWHTSHVSAQFFENK                      | 144 | 22 | 7  | 18.15  | b5°b5b9y11°y11*y11y1<br>8           | 2528.24 | 108.474 | 27587 | 3 | 843.42  | 11.88  |
| Q96TA2 YME1L1_HUMAN ATP-dependent metalloprotease YME1L1 | 14 | Carbamidomethyl+C(10)                                                                              | HHSRALQSICSDLQYWPVFIQSR                   | 183 | 23 | 5  | 17.47  | b3b13°b13y10y17                     | 2828.40 | 100.072 | 4740  | 2 | 1414.71 | -0.69  |
| Q96TA2 YME1L1_HUMAN ATP-dependent metalloprotease YME1L1 | 15 |                                                                                                    | EMVTMKELEFSK                              | 562 | 12 | 4  | 36.14  | b3b10y6y7                           | 1471.72 | 64.206  | 2324  | 2 | 736.36  | -1.33  |
| Q96TA2 YME1L1_HUMAN ATP-dependent metalloprotease YME1L1 | 16 |                                                                                                    | IFEGYRSMFMPEAK                            | 75  | 14 | 5  | 32.99  | b6b7y7y9°y9                         | 1705.80 | 48.310  | 1917  | 3 | 569.27  | -1.72  |
| Q96TA2 YME1L1_HUMAN ATP-dependent metalloprotease YME1L1 | 17 | Oxidation+M(7)                                                                                     | AQLLAQMDVSMGGR                            | 644 | 14 | 8  | 62.91  | b3°b3b7b9y5y6y11y13                 | 1492.73 | 71.958  | 19129 | 3 | 498.25  | 2.21   |
| Q96TA2 YME1L1_HUMAN ATP-dependent metalloprotease YME1L1 | 18 | Oxidation+M(5)                                                                                     | EMVTMKELEFSK                              | 562 | 12 | 3  | 22.26  | b3b9y8                              | 1487.71 | 65.943  | 4515  | 2 | 744.36  | -0.57  |
| P05106 ITB3_HUMAN Integrin beta-3                        | 1  |                                                                                                    | NDASHLLVFTTDAK                            | 265 | 14 | 11 | 74.09  | b2b5b6b7°b7b12b13y4y<br>5°y5y14     | 1531.76 | 63.616  | 61626 | 3 | 511.26  | -12.91 |
| P05106 ITB3_HUMAN Integrin beta-3                        | 2  | Carbamidomethyl+C(2);<br>Carbamidomethyl+C(4);<br>Carbamidomethyl+C(9)                             | YCECDDFSCVR                               | 545 | 11 | 4  | 36.05  | y7y8y9y11                           | 1510.54 | 45.769  | 40180 | 2 | 755.78  | 3.31   |
| P05106 ITB3_HUMAN Integrin beta-3                        | 3  |                                                                                                    | EATSTFTNITYR                              | 774 | 12 | 7  | 37.24  | b5y1y3y6*y6y8y12                    | 1403.68 | 53.803  | 30699 | 2 | 702.34  | 0.26   |
| P05106 ITB3_HUMAN Integrin beta-3                        | 4  | Carbamidomethyl+C(4);<br>Carbamidomethyl+C(12)                                                     | TDTCMSSNGLLCSGR                           | 589 | 15 | 7  | 40.67  | y5y9y10°y10y11*y11y1<br>5           | 1658.70 | 49.055  | 27149 | 2 | 829.85  | 4.78   |
| P05106 ITB3_HUMAN Integrin beta-3                        | 5  | Carbamidomethyl+C(12)                                                                              | LAGIVQPNDGQCHVGSNDNHYAS<br>TTMDYPSLGLMTEK | 287 | 37 | 6  | 16.26  | b3b12b14°b14y6y11                   | 3993.84 | 71.911  | 10255 | 3 | 1331.95 | 8.93   |
| P05106 ITB3_HUMAN Integrin beta-3                        | 6  | Carbamidomethyl+C(8)                                                                               | ENLLKDNCAPESEIYPPVSEAR                    | 67  | 21 | 4  | 30.79  | y4y7y12y14                          | 2418.18 | 68.693  | 2488  | 2 | 1209.59 | 7.77   |
| P05106 ITB3_HUMAN Integrin beta-3                        | 7  | Carbamidomethyl+C(27)                                                                              | IGFGAFVDKPVSPYMYISPPEALEN<br>PCYDMK       | 176 | 31 | 9  | 68.77  | b6b7b16b17y3y6y12y13<br>y14         | 3535.68 | 94.520  | 68695 | 3 | 1179.23 | 4.76   |
| P05106 ITB3_HUMAN Integrin beta-3                        | 8  | Carbamidomethyl+C(1);<br>Carbamidomethyl+C(10);<br>Carbamidomethyl+C(12);<br>Carbamidomethyl+C(25) | CGPGWLGSCQCESEEDYRPSQQD<br>ECSPPR         | 487 | 28 | 4  | 14.89  | b9b11y5y10                          | 3374.34 | 53.584  | 14561 | 3 | 1125.45 | 4.41   |
| P05106 ITB3_HUMAN Integrin beta-3                        | 9  | Carbamidomethyl+C(3);<br>Carbamidomethyl+C(5);<br>Carbamidomethyl+C(8);<br>Carbamidomethyl+C(10)   | GECLCGQCVCSSDFGK                          | 524 | 17 | 12 | 113.56 | b3°b3b4y3y5°y5y6y8y9<br>y10y12y15   | 2000.79 | 40.156  | 13176 | 2 | 1000.90 | 7.20   |
| P05106 ITB3_HUMAN Integrin beta-3                        | 10 |                                                                                                    | WDTANNPLYK                                | 764 | 10 | 5  | 26.89  | b3b9y8°y8*y8                        | 1221.59 | 54.215  | 10605 | 2 | 611.30  | 0.70   |

|                                                       |    |                                                                       |                                |     |    |    |       |                                                         |         |         |        |   |         |        |
|-------------------------------------------------------|----|-----------------------------------------------------------------------|--------------------------------|-----|----|----|-------|---------------------------------------------------------|---------|---------|--------|---|---------|--------|
| P05106 ITB3_HUMAN Integrin beta-3                     | 11 | Carbamidomethyl+C(3)                                                  | DNCAPESIEFPVSEAR               | 72  | 16 | 3  | 17.15 | b9b14y9                                                 | 1820.78 | 55.318  | 3855   | 2 | 910.89  | -18.17 |
| P05106 ITB3_HUMAN Integrin beta-3                     | 12 | Carbamidomethyl+C(3)                                                  | TTCLPMFGYK                     | 207 | 10 | 4  | 40.11 | b6b7b9y4                                                | 1217.58 | 32.033  | 2657   | 2 | 609.29  | 10.43  |
| P05106 ITB3_HUMAN Integrin beta-3                     | 13 |                                                                       | IGDTVFSFSIEAKVR                | 416 | 14 | 3  | 27.05 | b3b6b7                                                  | 1521.81 | 105.266 | 120728 | 2 | 761.41  | -14.12 |
| P05106 ITB3_HUMAN Integrin beta-3                     | 14 |                                                                       | VLEDRPLSDKSGDSSQVTQVSP<br>QR   | 88  | 25 | 13 | 67.06 | b7b9°b9b10b14b17°b17<br>y3*y3y4y6*y6y7                  | 2685.32 | 40.448  | 85054  | 4 | 672.08  | -10.46 |
| P05106 ITB3_HUMAN Integrin beta-3                     | 15 | Carbamidomethyl+C(16)                                                 | DAPEGGFDAIMQATVCDEKIGWR        | 242 | 23 | 4  | 13.04 | b3b15*b15y8                                             | 2566.15 | 103.781 | 4240   | 4 | 642.29  | -7.90  |
| P05106 ITB3_HUMAN Integrin beta-3                     | 16 | Carbamidomethyl+C(18)                                                 | NRDAPEGGFDAIMQATVCDEK          | 240 | 21 | 3  | 13.86 | b4b6y10                                                 | 2324.04 | 114.741 | 2843   | 3 | 775.35  | 4.94   |
| P05106 ITB3_HUMAN Integrin beta-3                     | 17 |                                                                       | EATSTFTNITYRGT                 | 774 | 14 | 3  | 19.27 | b10y8y13                                                | 1561.75 | 61.266  | 2304   | 2 | 781.38  | 0.78   |
| P05106 ITB3_HUMAN Integrin beta-3                     | 18 | Carbamidomethyl+C(1);<br>Carbamidomethyl+C(12)<br>;Phosphoryl STY(16) | CDLKENLLKDNCAPESIEFPVSEA<br>R  | 63  | 25 | 6  | 28.06 | b11*b11y8y11y12y16                                      | 3014.37 | 70.857  | 7450   | 3 | 1005.46 | 6.80   |
| P05106 ITB3_HUMAN Integrin beta-3                     | 19 | Carbamidomethyl+C(19)<br>;Phosphoryl STY(12)                          | DEIESVKELKDTGKDAVNCTYK         | 662 | 22 | 6  | 28.93 | b8b12b13y3y10°y10                                       | 2622.21 | 57.109  | 4214   | 3 | 874.74  | 7.63   |
| P05106 ITB3_HUMAN Integrin beta-3                     | 20 | Phosphoryl STY(15)                                                    | WDTANNPLYKEATSTFTNITYR         | 764 | 22 | 10 | 52.34 | b4°b4b5_H3PO4<br>b5b9b11°b11b13°b14_<br>H3PO4 b13b14y11 | 2686.20 | 87.366  | 3249   | 2 | 1343.61 | -1.55  |
| P05106 ITB3_HUMAN Integrin beta-3                     | 21 | Carbamidomethyl+C(16)<br>;Oxidation+M(11)                             | DAPEGGFDAIMQATVCDEK            | 242 | 19 | 4  | 20.68 | b10b15y11y15                                            | 2069.88 | 83.120  | 3591   | 2 | 1035.44 | -0.12  |
| P05106 ITB3_HUMAN Integrin beta-3                     | 22 | Oxidation+M()                                                         | QVEDYPVDIYLLMDLSYSMK           | 131 | 20 | 6  | 33.43 | b10y3y6y9°y9y11                                         | 2488.14 | 97.420  | 1920   | 2 | 1244.57 | 3.73   |
| P30101 PDIA3_HUMAN Protein disulfide-<br>isomerase A3 | 1  |                                                                       | FISDKDASIVGFFDDSFSEAHSEFL<br>K | 147 | 26 | 7  | 30.14 | b2b5b9y3y6y9y16                                         | 2938.36 | 99.093  | 56085  | 4 | 735.34  | -7.31  |
| P30101 PDIA3_HUMAN Protein disulfide-<br>isomerase A3 | 2  |                                                                       | LAPEYEAATR                     | 62  | 11 | 5  | 36.05 | y1y5y7y9y11                                             | 1191.60 | 37.983  | 29940  | 2 | 596.30  | -1.02  |
| P30101 PDIA3_HUMAN Protein disulfide-<br>isomerase A3 | 3  |                                                                       | EATNPPVIQEEKPK                 | 482 | 14 | 7  | 30.72 | b9y2y7y9y10°y10y14                                      | 1579.82 | 34.205  | 23200  | 3 | 527.28  | -10.20 |
| P30101 PDIA3_HUMAN Protein disulfide-<br>isomerase A3 | 4  |                                                                       | FLQDYFDGNLKR                   | 351 | 12 | 4  | 26.24 | b5°b5b6y10                                              | 1515.75 | 58.188  | 11862  | 2 | 758.38  | -3.30  |
| P30101 PDIA3_HUMAN Protein disulfide-<br>isomerase A3 | 5  |                                                                       | SEPIPESNDGPVK                  | 366 | 13 | 5  | 50.27 | b10y4y5y9y10                                            | 1368.66 | 38.418  | 6755   | 2 | 684.84  | -0.80  |
| P30101 PDIA3_HUMAN Protein disulfide-<br>isomerase A3 | 6  | Carbamidomethyl+C(19)<br>;Carbamidomethyl+C(22)<br>)                  | ISDTGSAGLMLVEFFAPWCGHCK<br>R   | 38  | 24 | 3  | 12.27 | b6b14°b14                                               | 2739.28 | 136.333 | 2867   | 3 | 913.76  | -3.30  |
| P30101 PDIA3_HUMAN Protein disulfide-<br>isomerase A3 | 7  |                                                                       | DLIIAYYDVDYEK                  | 258 | 13 | 6  | 43.07 | b6b12y3y7y10°y10                                        | 1619.77 | 46.123  | 17156  | 3 | 540.60  | -8.37  |
| P30101 PDIA3_HUMAN Protein disulfide-<br>isomerase A3 | 8  |                                                                       | ELGEK                          | 417 | 5  | 2  | 26.43 | b3b4                                                    | 575.31  | 25.836  | 16191  | 1 | 575.31  | 3.39   |
| P30101 PDIA3_HUMAN Protein disulfide-<br>isomerase A3 | 9  |                                                                       | ALER                           | 347 | 4  | 2  | 12.81 | y3°y3                                                   | 488.29  | 64.817  | 12659  | 1 | 488.29  | 7.31   |
| P30101 PDIA3_HUMAN Protein disulfide-<br>isomerase A3 | 10 |                                                                       | DNYSR                          | 179 | 4  | 1  | 12.81 | y3                                                      | 567.25  | 29.551  | 9119   | 1 | 567.25  | -6.46  |
| P30101 PDIA3_HUMAN Protein disulfide-<br>isomerase A3 | 11 |                                                                       | TVAYTEQK                       | 218 | 8  | 5  | 54.07 | b3°b3b4b5b6                                             | 939.49  | 88.611  | 7863   | 1 | 939.49  | 8.90   |
| P30101 PDIA3_HUMAN Protein disulfide-<br>isomerase A3 | 12 | Carbamidomethyl+C(11)<br>;Carbamidomethyl+C(14)<br>)                  | DVLIEFYAPWCGHCK                | 395 | 15 | 3  | 18.12 | b4b10y10                                                | 1894.90 | 60.275  | 7696   | 3 | 632.31  | 21.65  |

|                                                   |    |                                                              |                                    |      |    |    |       |                                                        |         |         |        |   |         |        |
|---------------------------------------------------|----|--------------------------------------------------------------|------------------------------------|------|----|----|-------|--------------------------------------------------------|---------|---------|--------|---|---------|--------|
| P30101 PDIA3_HUMAN Protein disulfide-isomerase A3 | 13 | Carbamidomethyl+C(19);Carbamidomethyl+C(22)                  | ISDTGSAGLMLVEFFAPWCGHCK            | 38   | 23 | 7  | 35.28 | b6b9b15y11y13°y13y14                                   | 2583.14 | 88.653  | 6805   | 4 | 646.54  | -18.52 |
| P30101 PDIA3_HUMAN Protein disulfide-isomerase A3 | 14 |                                                              | GFPTIYFSPANK                       | 448  | 12 | 3  | 22.26 | b3b9y11                                                | 1341.67 | 63.955  | 4319   | 3 | 447.89  | -12.65 |
| P30101 PDIA3_HUMAN Protein disulfide-isomerase A3 | 15 |                                                              | TEEEFK                             | 140  | 6  | 1  | 13.62 | y4                                                     | 782.37  | 71.304  | 2315   | 1 | 782.37  | 12.79  |
| P30101 PDIA3_HUMAN Protein disulfide-isomerase A3 | 16 |                                                              | ELSDFISYLQREATNPPVIQEEKPK          | 471  | 25 | 3  | 12.4  | b6b20y12                                               | 2931.47 | 105.882 | 111137 | 4 | 733.62  | -14.16 |
| P30101 PDIA3_HUMAN Protein disulfide-isomerase A3 | 17 |                                                              | DLLIAYDVDYEKNAK                    | 258  | 16 | 3  | 25.52 | b8b11b12                                               | 1932.98 | 84.986  | 30190  | 2 | 966.99  | 11.30  |
| P30101 PDIA3_HUMAN Protein disulfide-isomerase A3 | 18 |                                                              | FISDKDASIVGFFDDSFSEAHSEFLK         | 147  | 26 | 3  | 12.13 | b14y6y14                                               | 2938.39 | 122.266 | 17550  | 3 | 980.13  | 3.16   |
| P30101 PDIA3_HUMAN Protein disulfide-isomerase A3 | 19 |                                                              | YEGGRELSDFISYLQR                   | 466  | 16 | 3  | 23.68 | b6b7y11                                                | 1932.92 | 72.710  | 12690  | 3 | 644.98  | -13.96 |
| P30101 PDIA3_HUMAN Protein disulfide-isomerase A3 | 20 |                                                              | SEPIPESNDGPVKVVVAENFDEIVNNENK      | 366  | 29 | 11 | 44.1  | b6b8*b8b11°b11y7°y7y8°y8y9y15                          | 3182.51 | 126.649 | 12172  | 4 | 796.38  | -10.66 |
| P30101 PDIA3_HUMAN Protein disulfide-isomerase A3 | 21 |                                                              | NAKGSNYWR                          | 271  | 9  | 5  | 59.9  | b5b6y4y5y6                                             | 1095.54 | 68.215  | 7516   | 2 | 548.27  | 8.69   |
| P30101 PDIA3_HUMAN Protein disulfide-isomerase A3 | 22 |                                                              | ELGEKLSK                           | 417  | 8  | 3  | 40.85 | y3y6y7                                                 | 903.50  | 26.622  | 5291   | 2 | 452.26  | -11.08 |
| P30101 PDIA3_HUMAN Protein disulfide-isomerase A3 | 23 |                                                              | AASNLRDNYR                         | 173  | 10 | 3  | 26.89 | b3b8y8                                                 | 1179.57 | 64.436  | 1954   | 1 | 1179.57 | -12.63 |
| P30101 PDIA3_HUMAN Protein disulfide-isomerase A3 | 24 | Phosphoryl STY(8)                                            | FVMQEEFSR                          | 335  | 9  | 5  | 30.47 | b5*b5b7_HPO3b7*b7y3                                    | 1252.51 | 41.084  | 184637 | 3 | 418.17  | 6.14   |
| P30101 PDIA3_HUMAN Protein disulfide-isomerase A3 | 25 | Carbamidomethyl+C(3);Carbamidomethyl+C(10);Phosphoryl STY(7) | VDCTANTNTCNK                       | 82   | 12 | 9  | 54.43 | b3°b3b4°b4b5°b5b6°b6y10                                | 1477.55 | 18.204  | 4863   | 3 | 493.19  | 9.91   |
| P30101 PDIA3_HUMAN Protein disulfide-isomerase A3 | 26 | Oxidation+M(1)                                               | MDATANDVPSPYEVR                    | 433  | 15 | 3  | 24.15 | b11b12y14                                              | 1680.76 | 44.165  | 26016  | 3 | 560.92  | 3.34   |
| P30101 PDIA3_HUMAN Protein disulfide-isomerase A3 | 27 |                                                              | EATNPPVIQEEKPK                     | 482  | 14 | 0  | 3.64  |                                                        | 1561.80 | 34.204  | 10832  | 3 | 521.27  | -11.72 |
| Q13201 MMRN1_HUMAN Multimerin-1                   | 1  |                                                              | TMTIINNAIDFIQDNYALKETLSTIKDNSEIHHK | 730  | 34 | 6  | 13.04 | b7b13y8°y8y32y34                                       | 3931.04 | 112.983 | 135726 | 5 | 787.01  | 13.17  |
| Q13201 MMRN1_HUMAN Multimerin-1                   | 2  |                                                              | GLTEFVEPIIQIK                      | 961  | 13 | 6  | 34.05 | b5°b5y4y6y9y13                                         | 1486.85 | 88.965  | 44506  | 2 | 743.93  | 0.49   |
| Q13201 MMRN1_HUMAN Multimerin-1                   | 3  |                                                              | AQEQQLIHTNQAESHTAVGR               | 283  | 21 | 20 | 101.3 | b1b2*b2b4y1y4y5°y5y6°y6y7°y9y10y11*y11y12*y12y13y19y21 | 2305.10 | 35.540  | 41531  | 4 | 577.03  | -13.03 |
| Q13201 MMRN1_HUMAN Multimerin-1                   | 4  |                                                              | GSVVTNER                           | 882  | 8  | 6  | 33.07 | b3b8°b8*b8y3y4                                         | 861.44  | 33.490  | 40921  | 2 | 431.22  | -1.77  |
| Q13201 MMRN1_HUMAN Multimerin-1                   | 5  | Carbamidomethyl+C(7)                                         | QEMTLTCEKPIK                       | 467  | 12 | 5  | 22.26 | b3y2y3y7y12                                            | 1477.73 | 42.002  | 18350  | 3 | 493.25  | -4.38  |
| Q13201 MMRN1_HUMAN Multimerin-1                   | 6  |                                                              | MSEQLNDLTYDMEIQLPLLEQGASLR         | 634  | 26 | 12 | 45.11 | b2b6b13y2y6*y6y7*y7y8y10y12y26                         | 3007.48 | 112.849 | 17352  | 3 | 1003.17 | 2.52   |
| Q13201 MMRN1_HUMAN Multimerin-1                   | 7  |                                                              | LVEENALAPDFSK                      | 1079 | 13 | 6  | 43.07 | b3b5*b5b12y6y11                                        | 1432.73 | 59.513  | 17173  | 2 | 716.87  | -2.22  |
| Q13201 MMRN1_HUMAN Multimerin-1                   | 8  |                                                              | NAPAAESVSNNVTEYMSTLHENIK           | 530  | 24 | 5  | 16.85 | b6b13°b13y9y13                                         | 2619.22 | 57.018  | 11942  | 4 | 655.56  | -5.50  |
| Q13201 MMRN1_HUMAN Multimerin-1                   | 9  | Carbamidomethyl+C(11)                                        | GVAEQQQQCGGDPEVMQK                 | 304  | 19 | 4  | 22.71 | b8y6y7°y7                                              | 2116.96 | 34.240  | 10640  | 2 | 1058.99 | 11.42  |
| Q13201 MMRN1_HUMAN Multimerin-1                   | 10 |                                                              | EVHEQLLSTEQVSDQK                   | 514  | 16 | 3  | 17.15 | b4b6y4                                                 | 1869.93 | 44.513  | 4301   | 2 | 935.47  | 5.42   |
| Q13201 MMRN1_HUMAN Multimerin-1                   | 11 |                                                              | SNEQATSLNTVGGTGGIGVGGTGGVGNR       | 148  | 29 | 8  | 38.76 | b1b2b8b9b15b16y12y29                                   | 2574.24 | 108.484 | 4138   | 3 | 858.75  | -5.69  |
| Q13201 MMRN1_HUMAN Multimerin-1                   | 12 |                                                              | FVLVQENRPTLTDIVELR                 | 442  | 18 | 3  | 22.97 | b3y13y14                                               | 2142.19 | 82.679  | 53076  | 3 | 714.73  | -1.94  |

|                                 |    |                                             |                                        |      |    |    |       |                                        |         |         |        |   |         |        |
|---------------------------------|----|---------------------------------------------|----------------------------------------|------|----|----|-------|----------------------------------------|---------|---------|--------|---|---------|--------|
| Q13201 MMRN1_HUMAN Multimerin-1 | 13 |                                             | TVSSLEDLESTR                           | 411  | 13 | 7  | 76.49 | b11b12y5y8y10y11y12                    | 1423.69 | 54.064  | 28921  | 2 | 712.35  | 1.03   |
| Q13201 MMRN1_HUMAN Multimerin-1 | 14 |                                             | FNPGAESVVLNSNLT                        | 124  | 16 | 7  | 51.86 | b3b5b6*b6b8b14y14                      | 1662.87 | 33.571  | 13793  | 4 | 416.47  | 1.47   |
| Q13201 MMRN1_HUMAN Multimerin-1 | 15 |                                             | QSLMMLQMFEDLHIQESK                     | 555  | 18 | 5  | 26.56 | b11y3y4y12*y12                         | 2208.09 | 97.275  | 6758   | 3 | 736.70  | 19.79  |
| Q13201 MMRN1_HUMAN Multimerin-1 | 16 |                                             | NQTLTSTEK                              | 96   | 9  | 5  | 45.44 | b3b6b7*b7y4                            | 1021.51 | 38.288  | 5167   | 2 | 511.26  | -4.48  |
| Q13201 MMRN1_HUMAN Multimerin-1 | 17 |                                             | QTHLEGALEQEHSR                         | 484  | 14 | 9  | 50.46 | b3b12°b12b13°b13y3y4°y4y7              | 1634.77 | 80.245  | 4363   | 2 | 817.89  | -10.38 |
| Q13201 MMRN1_HUMAN Multimerin-1 | 18 |                                             | TMPSASVPPNK                            | 37   | 11 | 4  | 24.29 | b5y6y10°y10                            | 1128.60 | 71.965  | 4187   | 2 | 564.80  | 21.96  |
| Q13201 MMRN1_HUMAN Multimerin-1 | 19 | Carbamidomethyl+C(10);Carbamidomethyl+C(11) | TQAALSNLTCCIDR                         | 974  | 14 | 4  | 27.55 | b3b9y9y11                              | 1622.79 | 64.516  | 3785   | 3 | 541.60  | 18.66  |
| Q13201 MMRN1_HUMAN Multimerin-1 | 20 |                                             | LNDSIQTLVNDNQR                         | 781  | 14 | 3  | 19.27 | b6y8y10                                | 1629.84 | 74.966  | 3698   | 2 | 815.42  | 10.11  |
| Q13201 MMRN1_HUMAN Multimerin-1 | 21 | Carbamidomethyl+C(1)                        | CQLR                                   | 279  | 4  | 1  | 12.81 | y3                                     | 576.29  | 66.666  | 1850   | 1 | 576.29  | -11.23 |
| Q13201 MMRN1_HUMAN Multimerin-1 | 22 | Carbamidomethyl+C(3);Carbamidomethyl+C(10)  | GPCGWTGGSCPQRSQK                       | 235  | 16 | 6  | 30.77 | b6b14y12°y12y13°y13                    | 1762.77 | 92.631  | 177934 | 3 | 588.26  | -5.47  |
| Q13201 MMRN1_HUMAN Multimerin-1 | 23 |                                             | STLPPSETSAPAEGVRNQTLTSTEK              | 80   | 25 | 7  | 41.91 | b8b12b13°b13b14°b14b19                 | 2601.32 | 88.709  | 102144 | 3 | 867.78  | 6.10   |
| Q13201 MMRN1_HUMAN Multimerin-1 | 24 |                                             | LNQSNFQKMYQMFNETTSQVR                  | 814  | 21 | 4  | 13.86 | b6*b6b13y10                            | 2594.22 | 92.603  | 31158  | 3 | 865.41  | 1.60   |
| Q13201 MMRN1_HUMAN Multimerin-1 | 25 |                                             | NTYSSLEGKVSEDK                         | 353  | 14 | 3  | 24.71 | b3b4y3                                 | 1556.73 | 33.503  | 11413  | 3 | 519.58  | -6.43  |
| Q13201 MMRN1_HUMAN Multimerin-1 | 26 |                                             | NEVQGRDDALER                           | 703  | 12 | 4  | 22.26 | b5°b5b7y9                              | 1401.69 | 82.079  | 6769   | 2 | 701.35  | 11.23  |
| Q13201 MMRN1_HUMAN Multimerin-1 | 27 |                                             | ETLSTIKDNSEIHHK                        | 749  | 15 | 12 | 74.1  | b8b10b12b13°b13y7y9°y9*y9y12°y12y14    | 1751.87 | 103.709 | 6277   | 2 | 876.44  | -12.12 |
| Q13201 MMRN1_HUMAN Multimerin-1 | 28 | Carbamidomethyl+C(14)                       | LAFESENINSEIHDRVLTGDALLE<br>LNYGQEVWLR | 1169 | 35 | 8  | 51.03 | b9*b9b10b11b12y6*y6y11                 | 4103.99 | 136.355 | 5159   | 4 | 1026.75 | -4.76  |
| Q13201 MMRN1_HUMAN Multimerin-1 | 29 |                                             | LVEENALAPDFSKGSYR                      | 1079 | 17 | 4  | 23.29 | b6y13y14*y14                           | 1895.93 | 82.113  | 3858   | 2 | 948.47  | -9.85  |
| Q13201 MMRN1_HUMAN Multimerin-1 | 30 | Carbamidomethyl+C(21);Carbamidomethyl+C(28) | LSPTVILDNQVTVYVPGGKGPCGW<br>TGGSCPQR   | 217  | 31 | 4  | 11.25 | b3°b3b13y7                             | 3301.62 | 100.658 | 3538   | 5 | 661.13  | 2.07   |
| Q13201 MMRN1_HUMAN Multimerin-1 | 31 |                                             | INEYALEMEDGLNKTMTIINNAIDF<br>IQDNYALK  | 716  | 33 | 6  | 17.8  | b4*b4b8y3y7y11                         | 3817.89 | 108.425 | 3237   | 3 | 1273.30 | 6.78   |
| Q13201 MMRN1_HUMAN Multimerin-1 | 32 |                                             | MDKMSEQLNDLTYDMEILQPLLE<br>QGASLR      | 631  | 29 | 4  | 26.56 | b3b4b10b13                             | 3381.65 | 120.599 | 3052   | 3 | 1127.89 | 3.03   |
| Q13201 MMRN1_HUMAN Multimerin-1 | 33 |                                             | TDYQKSNFETTR                           | 194  | 12 | 5  | 34.22 | b7*b7b10b11y10                         | 1489.71 | 46.110  | 2318   | 2 | 745.36  | 13.68  |
| Q13201 MMRN1_HUMAN Multimerin-1 | 34 | Carbamidomethyl+C(17)                       | TQRNTDNIIPPEYSSCSR                     | 1028 | 19 | 6  | 23.64 | b6°b6*b6b10b12y8                       | 2333.07 | 100.700 | 1945   | 3 | 778.36  | 9.94   |
| Q13201 MMRN1_HUMAN Multimerin-1 | 35 | Phosphoryl STY(5)                           | LQNLTLPTNASIK                          | 111  | 13 | 4  | 34.05 | b3y5y9y11                              | 1492.78 | 80.351  | 94168  | 3 | 498.26  | 6.62   |
| Q13201 MMRN1_HUMAN Multimerin-1 | 36 | Phosphoryl STY(6)                           | SREFQSLLK                              | 367  | 9  | 6  | 44.93 | b5b7°b7*b7y5y7                         | 1187.57 | 33.528  | 41986  | 2 | 594.29  | -1.64  |
| Q13201 MMRN1_HUMAN Multimerin-1 | 37 | Phosphoryl STY(7)                           | INNLTVSLEMEK                           | 573  | 12 | 5  | 32.16 | b7_H3PO4<br>b7b11_H3PO4<br>b11y5°y5y11 | 1470.69 | 88.693  | 10211  | 2 | 735.85  | 8.96   |
| Q13201 MMRN1_HUMAN Multimerin-1 | 38 | Phosphoryl STY(7)                           | LNDSIQTLVNDNQR                         | 781  | 14 | 10 | 80.11 | b4b5°b5b6b8b9y4*y4y5y13                | 1709.76 | 81.418  | 2555   | 2 | 855.39  | -6.64  |
| Q13201 MMRN1_HUMAN Multimerin-1 | 39 | Oxidation+M(2)                              | VMSAEIATTPPEAR                         | 59   | 13 | 3  | 25.4  | b7y10y11                               | 1391.70 | 74.379  | 4797   | 2 | 696.35  | 12.63  |

|                                 |    |                 |                                 |     |    |   |       |              |         |         |      |   |        |        |
|---------------------------------|----|-----------------|---------------------------------|-----|----|---|-------|--------------|---------|---------|------|---|--------|--------|
| Q13201 MMRN1_HUMAN Multimerin-1 | 40 | Oxidation+M(16) | NAPAAESVSNNVTEYMSTLHENIK        | 530 | 24 | 4 | 23.41 | b10b14b15y11 | 2635.22 | 88.737  | 4555 | 4 | 659.56 | -4.63  |
| Q13201 MMRN1_HUMAN Multimerin-1 | 41 | Oxidation+M(2)  | TMTIINNAIDFIQDNYALK             | 730 | 19 | 3 | 14.93 | b3b7y7       | 2214.08 | 69.630  | 3777 | 3 | 738.70 | -14.78 |
| Q13201 MMRN1_HUMAN Multimerin-1 | 42 | Oxidation+M(8)  | INEYALEMEDGLNK                  | 716 | 14 | 3 | 24.71 | b4b5y12      | 1654.75 | 62.997  | 1548 | 4 | 414.44 | -4.87  |
| Q13201 MMRN1_HUMAN Multimerin-1 | 43 |                 | VSNNVTEYMSTLHENIK               | 537 | 17 | 1 | 8.12  | b12          | 1978.93 | 57.060  | 7258 | 2 | 989.97 | -10.12 |
| Q13201 MMRN1_HUMAN Multimerin-1 | 44 |                 | SNEQATSLNTVGGTGGIGGGT<br>GGVGNR | 148 | 29 | 0 | 9.72  |              | 2556.21 | 108.487 | 2738 | 3 | 852.74 | -7.83  |

Cystic fibrosis PLT LC-MS run 2: PLT\_CF\_290709\_02

| Protein name                             | Peptide Rank | Peptide Modification                    | Peptide Sequence                      | Peptide sequence start | Peptide sequence Length | Peptide Matched Products | Score  | By Matches                                                          | Precursor MH+ (Da) | Retention time (min) | Intensity | z | Precursor m/z | MH+ Error (ppm) |
|------------------------------------------|--------------|-----------------------------------------|---------------------------------------|------------------------|-------------------------|--------------------------|--------|---------------------------------------------------------------------|--------------------|----------------------|-----------|---|---------------|-----------------|
| P07737 PROF1_HUMAN Profilin-1            | 1            |                                         | TFVNITPAEVGVLVGK                      | 38                     | 16                      | 22                       | 128.66 | b2°b2b3b4°b4b5°b5°b5b6°b6°b6b12y1y2y6y7y10y11y12y13y14y16           | 1643.94            | 85.036               | 358821    | 2 | 822.47        | 0.59            |
| P07737 PROF1_HUMAN Profilin-1            | 2            |                                         | STGGAPTfNVTvTK                        | 91                     | 14                      | 17                       | 89.52  | b1b2°b2b5°b5b7°b7b10y1y3y4y5y9°y9y10y12y14                          | 1379.72            | 51.285               | 342706    | 2 | 690.36        | 2.21            |
| P07737 PROF1_HUMAN Profilin-1            | 3            |                                         | SSFYVNGLTGGQK                         | 56                     | 14                      | 25                       | 184.45 | b3°b3b4°b4b5°b5b6°b6b11°b11b13y3y4*y4y5y6y7y8y9*y9y10*y10y11*y11y14 | 1470.76            | 66.633               | 330411    | 2 | 735.89        | 3.73            |
| P07737 PROF1_HUMAN Profilin-1            | 4            |                                         | TFVNITPAEVGVLVGKDR                    | 38                     | 18                      | 17                       | 83.92  | b2°b2b3°b3b4°b4b5°b5°b5y2y5y6y8y13y15y16y18                         | 1915.04            | 79.272               | 184223    | 3 | 639.02        | -11.09          |
| P07737 PROF1_HUMAN Profilin-1            | 5            |                                         | TLVLLMGK                              | 108                    | 8                       | 8                        | 60.31  | b2b5y2y3y4y5y6y8                                                    | 874.53             | 68.311               | 180689    | 2 | 437.77        | -12.35          |
| P07737 PROF1_HUMAN Profilin-1            | 6            |                                         | DSPSVWAAVPGK                          | 26                     | 12                      | 9                        | 66.4   | b9°b9y1y3y4y6y7y10y12                                               | 1213.62            | 58.050               | 119004    | 2 | 607.32        | 1.41            |
| P07737 PROF1_HUMAN Profilin-1            | 7            |                                         | EGVHGGLINKK                           | 116                    | 11                      | 25                       | 109.63 | b1°b1b2°b2b6°b6b7°b7b9°b9b10°b10b11°b11y1y2y3*y3y4*y4y6y7*y7y8y11   | 1151.64            | 21.603               | 69087     | 2 | 576.32        | -12.19          |
| P07737 PROF1_HUMAN Profilin-1            | 8            |                                         | EGVHGGLINK                            | 116                    | 10                      | 8                        | 55.98  | b5°b5b6°b6b7b9°b9y5                                                 | 1023.57            | 28.793               | 14338     | 2 | 512.29        | 9.12            |
| P07737 PROF1_HUMAN Profilin-1            | 9            | Carbamidomethyl+C(1)                    | CYEMASHLR                             | 127                    | 9                       | 7                        | 59.51  | b8°b8y4y6y7y8°y8                                                    | 1166.51            | 27.180               | 8629      | 2 | 583.76        | 4.40            |
| P07737 PROF1_HUMAN Profilin-1            | 10           |                                         | DSLLQDGEFSMDLR                        | 75                     | 14                      | 3                        | 18.27  | b3b6y13                                                             | 1625.75            | 83.721               | 4238      | 2 | 813.38        | 3.00            |
| P07737 PROF1_HUMAN Profilin-1            | 11           |                                         | TKSTGGAPTfNVTvTK                      | 89                     | 16                      | 5                        | 22.87  | b7°b7b12y8y14                                                       | 1608.86            | 45.912               | 8399      | 2 | 804.93        | -0.99           |
| P07737 PROF1_HUMAN Profilin-1            | 12           |                                         | EGVHGGLINKK                           | 116                    | 11                      | 3                        | 30.14  | y3y4y7                                                              | 1151.64            | 28.843               | 3087      | 3 | 384.55        | -14.95          |
| P07737 PROF1_HUMAN Profilin-1            | 13           |                                         | DSLLQDGEFSMDLRtk                      | 75                     | 16                      | 3                        | 22.77  | b7y10y11                                                            | 1854.88            | 80.976               | 2293      | 3 | 618.96        | -6.58           |
| P07737 PROF1_HUMAN Profilin-1            | 14           | Carbamidomethyl+C(16);Phosphoryl STY(6) | AGWNAyIDNLMADGTCQDAaIVGYKDSPSVWAAVPGK | 1                      | 37                      | 11                       | 69.42  | b4y3y7y12y14y15y23y24y25y27y30                                      | 3991.78            | 104.018              | 239646    | 4 | 998.70        | -4.22           |
| P07737 PROF1_HUMAN Profilin-1            | 15           | Phosphoryl STY(0)                       | STGGAPTfNVTvTK                        | 91                     | 14                      | 8                        | 72.94  | b10_H3PO4 b10_HPO3 b10y4_HPO3 y4y7_HPO3 y7y8y9y10y13_HPO3 y13*y13   | 1459.68            | 136.412              | 1866      | 1 | 1459.68       | 6.44            |
| P07737 PROF1_HUMAN Profilin-1            | 16           |                                         | VHGGLINKK                             | 118                    | 9                       | 0                        | 2.7    |                                                                     | 965.59             | 21.575               | 2097      | 2 | 483.30        | -1.01           |
| P07737 PROF1_HUMAN Profilin-1            | 17           |                                         | LVLLMGK                               | 109                    | 7                       | 0                        | 1.35   |                                                                     | 773.50             | 68.298               | 1683      | 2 | 387.25        | 4.73            |
| P68871 HBB_HUMAN Hemoglobin subunit beta | 1            |                                         | LLVVYPWTQR                            | 31                     | 10                      | 19                       | 112.19 | b2b3b4b5y1y2*y2y3*y3y4*y4y5°y5°y5y6y7y8y10*y10                      | 1274.71            | 78.013               | 611373    | 2 | 637.86        | -10.15          |
| P68871 HBB_HUMAN Hemoglobin subunit beta | 2            | Carbamidomethyl+C(8)                    | LLGNVLCVLAHHFGK                       | 105                    | 16                      | 18                       | 164.12 | b2b3b4°b4b5°b5y2y3y4y5y6y8y9y10y11y13y15y16                         | 1776.97            | 91.348               | 393862    | 3 | 593.00        | -12.43          |

|                                          |    |                       |                       |     |    |    |        |                                                                           |         |        |         |   |         |        |
|------------------------------------------|----|-----------------------|-----------------------|-----|----|----|--------|---------------------------------------------------------------------------|---------|--------|---------|---|---------|--------|
| P68871 HBB_HUMAN Hemoglobin subunit beta | 3  |                       | VNVDEVGGEALGR         | 18  | 13 | 27 | 190.02 | b2b3b4*b4b5*b5b6*b6b9b11y2y3y4y6y7y8y9°y9y10°y10y11°y11y12°y12*y12y13*y13 | 1314.67 | 50.178 | 372366  | 2 | 657.84  | 3.90   |
| P68871 HBB_HUMAN Hemoglobin subunit beta | 4  |                       | VLGAFSDGLAHLNLIK      | 67  | 16 | 17 | 131.73 | b2b3y1y2y3y4y5y6y7y9y11y12°y12*y12y13y14y16                               | 1669.87 | 75.882 | 357979  | 3 | 557.29  | -14.62 |
| P68871 HBB_HUMAN Hemoglobin subunit beta | 5  |                       | EFTPPVQAAYQK          | 121 | 12 | 16 | 97.34  | b1b2°b2b3°b3b4y1y2*y2y3y4y5y8y9y10y12                                     | 1378.71 | 49.610 | 322847  | 2 | 689.86  | 4.87   |
| P68871 HBB_HUMAN Hemoglobin subunit beta | 6  |                       | FFESFGDLSTPDAVMGNPK   | 41  | 19 | 24 | 167.19 | b2b3b4°b4b8b13b17y2y4*y4y5y7y8°y8y9y10*y10y11y12y14y15*y15y16y19          | 2058.95 | 81.438 | 317368  | 2 | 1029.98 | 3.32   |
| P68871 HBB_HUMAN Hemoglobin subunit beta | 7  |                       | VVAGVANALAHK          | 133 | 12 | 13 | 105.12 | b2y2y3y4y5y6*y6y7*y7y8y9y10y12                                            | 1149.67 | 41.357 | 144853  | 2 | 575.34  | -1.81  |
| P68871 HBB_HUMAN Hemoglobin subunit beta | 8  | Carbamidomethyl+C(11) | GTFATLSELHCDK         | 83  | 13 | 15 | 113.28 | b3°b3b4°b4b8y1y4y5y7y8y9y10°y10y11y13                                     | 1478.70 | 53.208 | 127584  | 2 | 739.85  | 1.65   |
| P68871 HBB_HUMAN Hemoglobin subunit beta | 9  |                       | SAVTALWGK             | 9   | 9  | 6  | 72.26  | b7y3y4y5y6y7                                                              | 932.52  | 60.288 | 28719   | 1 | 932.52  | -2.95  |
| P68871 HBB_HUMAN Hemoglobin subunit beta | 10 |                       | MVHLTPEEKSAVTALWGK    | 0   | 18 | 3  | 14.75  | b5b10y16                                                                  | 1997.07 | 71.016 | 918662  | 2 | 999.04  | 9.23   |
| P68871 HBB_HUMAN Hemoglobin subunit beta | 11 | Carbamidomethyl+C(11) | GTFATLSELHCDKLVDPENFR | 83  | 22 | 6  | 55.93  | y3y5y6y7y8y17                                                             | 2586.22 | 66.910 | 202811  | 4 | 647.31  | -9.82  |
| P68871 HBB_HUMAN Hemoglobin subunit beta | 12 |                       | SAVTALWGKVNVDVGEALGR  | 9   | 22 | 3  | 12.79  | b4y8y13                                                                   | 2228.19 | 88.710 | 16006   | 3 | 743.40  | 12.49  |
| P68871 HBB_HUMAN Hemoglobin subunit beta | 13 |                       | AGVANALAHK            | 135 | 10 | 5  | 62.11  | b3b4b6b8b9                                                                | 951.53  | 41.362 | 84983   | 2 | 476.27  | -6.99  |
| P68871 HBB_HUMAN Hemoglobin subunit beta | 14 | Carbamidomethyl+C(2)  | VCVLAHHFGK            | 111 | 10 | 0  | 4.95   |                                                                           | 1167.60 | 91.374 | 49250   | 2 | 584.30  | -7.11  |
| P68871 HBB_HUMAN Hemoglobin subunit beta | 15 |                       | VAGVANALAHK           | 134 | 11 | 2  | 16.88  | b3b5                                                                      | 1050.60 | 41.366 | 21964   | 2 | 525.81  | -1.98  |
| P68871 HBB_HUMAN Hemoglobin subunit beta | 16 |                       | GAFSDGLAHLNLIK        | 69  | 14 | 1  | 7.28   | b4                                                                        | 1457.75 | 75.908 | 19537   | 2 | 729.38  | 6.36   |
| P68871 HBB_HUMAN Hemoglobin subunit beta | 17 | Carbamidomethyl+C(6)  | GNVLCVLAHHFGK         | 107 | 14 | 2  | 13.91  | b3b6                                                                      | 1550.81 | 91.357 | 16620   | 3 | 517.61  | -13.54 |
| P68871 HBB_HUMAN Hemoglobin subunit beta | 18 | Carbamidomethyl+C(3)  | LVCVLAHHFGK           | 110 | 11 | 1  | 7.28   | b3                                                                        | 1280.69 | 91.332 | 8239    | 2 | 640.85  | -2.76  |
| P68871 HBB_HUMAN Hemoglobin subunit beta | 19 | Carbamidomethyl+C(9)  | FATLSELHCDK           | 85  | 11 | 4  | 27.06  | b5b8b9°b9                                                                 | 1320.62 | 53.221 | 7583    | 3 | 440.88  | -1.66  |
| P68871 HBB_HUMAN Hemoglobin subunit beta | 20 |                       | ANALAHK               | 138 | 7  | 1  | 7.44   | b4                                                                        | 724.40  | 41.334 | 4545    | 1 | 724.40  | -14.24 |
| P68871 HBB_HUMAN Hemoglobin subunit beta | 21 | Carbamidomethyl+C(4)  | VLVCVLAHHFGK          | 109 | 12 | 0  | 4.95   |                                                                           | 1379.75 | 91.338 | 2474    | 2 | 690.38  | -5.49  |
| P68871 HBB_HUMAN Hemoglobin subunit beta | 22 |                       | LAHHFGK               | 114 | 7  | 1  | 7.28   | b5                                                                        | 809.43  | 91.364 | 1893    | 2 | 405.22  | -14.33 |
| P68871 HBB_HUMAN Hemoglobin subunit beta | 23 | Carbamidomethyl+C(1)  | CVLAHHFGK             | 112 | 9  | 0  | 4.95   |                                                                           | 1068.53 | 91.356 | 1794    | 3 | 356.85  | -7.54  |
| P68871 HBB_HUMAN Hemoglobin subunit beta | 24 | Carbamidomethyl+C(11) | GTFATLSELHCDK         | 83  | 13 | 0  | 3.6    |                                                                           | 1460.68 | 53.193 | 21808   | 3 | 487.56  | -2.09  |
| P68871 HBB_HUMAN Hemoglobin subunit beta | 25 | Carbamidomethyl+C(8)  | LLGNVLCVLAHHFGK       | 105 | 16 | 0  | 4.95   |                                                                           | 1759.94 | 91.351 | 4317    | 4 | 440.74  | -12.42 |
| P63261 ACTG_HUMAN Actin                  | 1  |                       | AGFAGDDAPR            | 18  | 10 | 14 | 110.94 | b2b3b4y1y2y3y4y5y6y7°y7y8y9y10                                            | 976.44  | 29.683 | 2755233 | 2 | 488.73  | -4.69  |
| P63261 ACTG_HUMAN Actin                  | 2  |                       | EITALAPSTMK           | 315 | 11 | 23 | 119.37 | b1b2°b2b3°b3b4°b4b6y1y2y3°y3y4°y4y5°y5y6°y6y7y8y9°y9y11                   | 1161.62 | 49.700 | 1560449 | 2 | 581.31  | 3.15   |



|                         |    |                                                |                                    |     |    |    |        |                                                                                                                                                           |         |         |         |   |         |        |
|-------------------------|----|------------------------------------------------|------------------------------------|-----|----|----|--------|-----------------------------------------------------------------------------------------------------------------------------------------------------------|---------|---------|---------|---|---------|--------|
| P63261 ACTG_HUMAN Actin | 3  | Carbamidomethyl+C(1);<br>Carbamidomethyl+C(16) | CPEALFQPSFLGMESCGIHETTFNS<br>IMK   | 256 | 28 | 47 | 367.47 | b2b3b4°b4b5b6°b6b7°b7b8°<br>b8b9b10°b10b11b13b14<br>b15°b15b17b28y2y3y4y5y<br>6y8y9y10y12*y12y13°y13y<br>14*y14y15y16y17y18°y18y<br>21y22*y22y23y24y25y28 | 3231.46 | 91.644  | 1492513 | 3 | 1077.83 | 0.83   |
| P63261 ACTG_HUMAN Actin | 4  |                                                | TTGIVMDSGDGVTHTVPIYEGYA<br>LPHAILR | 147 | 30 | 34 | 244.12 | b2°b2b3°b3b4°b4b6°b6b18<br>b26°b26b30y2y3y5y6y7y8y<br>9y10y11y12y14y15y16y20<br>y22y23y24y25°y25y26y28y<br>30                                             | 3183.59 | 79.352  | 1210757 | 4 | 796.65  | -6.67  |
| P63261 ACTG_HUMAN Actin | 5  |                                                | AVFPSIVGRPR                        | 28  | 11 | 14 | 120.16 | b2b3b9y1y2y3y4y5y6y7y8°<br>y8y9y10                                                                                                                        | 1198.70 | 55.035  | 962517  | 2 | 599.85  | -4.38  |
| P63261 ACTG_HUMAN Actin | 6  |                                                | DSYVGDEAQSQR                       | 50  | 12 | 38 | 191.33 | b1b2°b2b3°b3b4b7°b7b8b9<br>b10y1y2y3°y3y4°y4*y4y5°<br>y5*y5y6°y6*y6y7°y7*y7y8<br>°y8*y8y9°y9*y9y10°y10y1<br>1y12*y12                                      | 1354.62 | 22.176  | 672819  | 2 | 677.81  | -3.87  |
| P63261 ACTG_HUMAN Actin | 7  |                                                | DLYANTVLSGGTTMYPGIADR              | 291 | 21 | 25 | 193.84 | b2b4b7b12b14b18°b18y1y<br>2y4y5y6y7y8°y8y9y11y12y<br>13y14°y14y16y17y18y21                                                                                | 2215.08 | 76.658  | 660153  | 2 | 1108.05 | 6.50   |
| P63261 ACTG_HUMAN Actin | 8  |                                                | GYSFTTTAER                         | 196 | 10 | 18 | 116.96 | b2b3°b3b5°b5b9y1y2°y2y3<br>y4°y4y5y6y7°y7y8y10                                                                                                            | 1132.52 | 41.823  | 633605  | 2 | 566.77  | -3.66  |
| P63261 ACTG_HUMAN Actin | 9  |                                                | HQGVMMVGMGQK                       | 39  | 11 | 27 | 193.89 | b1b2°b2b3b4b5b6°b6b7b8<br>°b8b9b10y1y2*y2y3*y3y4<br>*y4y5y6y7y9y10*y10y11                                                                                 | 1171.57 | 31.981  | 467461  | 2 | 586.29  | 0.52   |
| P63261 ACTG_HUMAN Actin | 10 |                                                | QEYDESGPSIVHRK                     | 359 | 14 | 19 | 134.71 | b3°b3°b3b14y2y3y4y5y6°y<br>6y7y8y9y10°y10y11y12y14<br>*y14                                                                                                | 1644.79 | 30.678  | 465849  | 3 | 548.93  | -7.27  |
| P63261 ACTG_HUMAN Actin | 11 |                                                | DSYVGDEAQSQR                       | 50  | 11 | 28 | 168.4  | b2°b2b3°b3b6b8b9b10y2°y<br>2y3°y3*y3y4°y4*y4y5°y5*<br>y5y6*y6y7y8°y8y9*y9y10y<br>11                                                                       | 1198.53 | 24.413  | 318859  | 2 | 599.77  | 4.79   |
| P63261 ACTG_HUMAN Actin | 12 |                                                | KDLYANTVLSGGTTMYPGIADR             | 290 | 22 | 36 | 263.78 | b3b4b5b6b7°b7°b7b8°b8°<br>b8b9b11°b11b12b14°b14b<br>15b16°b16b22y1y2y3y4y5<br>y6y7y8y9y10y12y13°y13y1<br>4°y14y22                                         | 2343.16 | 68.065  | 301965  | 3 | 781.73  | -0.94  |
| P63261 ACTG_HUMAN Actin | 13 |                                                | LDLAGRDLTDYLMK                     | 177 | 14 | 10 | 54.29  | b2b3b12y1y2y3y4y11y12y<br>14                                                                                                                              | 1623.82 | 77.782  | 226010  | 3 | 541.94  | -13.23 |
| P63261 ACTG_HUMAN Actin | 14 |                                                | QEYDESGPSIVHR                      | 359 | 13 | 12 | 89.81  | y1y2y3y4y5y6y8y10°y10y1<br>1y13°y13                                                                                                                       | 1516.69 | 36.606  | 191103  | 3 | 506.24  | -8.05  |
| P63261 ACTG_HUMAN Actin | 15 |                                                | IIAPPERK                           | 328 | 8  | 13 | 73.06  | b2b3y1y2y3°y3y4°y4y5°y5<br>y6y7y8                                                                                                                         | 923.56  | 25.342  | 126049  | 2 | 462.28  | -10.05 |
| P63261 ACTG_HUMAN Actin | 16 | Carbamidomethyl+C(1)                           | CDVDIRK                            | 284 | 7  | 13 | 77.38  | b1b2°b2b3b4y2y3y4°y4y5y<br>6°y6y7                                                                                                                         | 905.44  | 21.103  | 22589   | 2 | 453.22  | -12.13 |
| P63261 ACTG_HUMAN Actin | 17 |                                                | YSVWIGGSILASLSTFQQMWISK            | 336 | 23 | 11 | 67.64  | b3b4°b4b7b9b10y2y5y6y7<br>y23                                                                                                                             | 2602.36 | 136.428 | 14063   | 3 | 868.12  | 8.26   |
| P63261 ACTG_HUMAN Actin | 18 |                                                | MTQIMFETFNTPAMYVAIQAVLSL<br>YASGR  | 118 | 29 | 6  | 21.33  | b4°b4b5b14y1y3                                                                                                                                            | 3253.62 | 136.574 | 5015    | 3 | 1085.21 | 4.35   |

|                         |    |                                                |                                          |     |    |    |        |                                                                                                                                                           |         |        |         |   |         |        |
|-------------------------|----|------------------------------------------------|------------------------------------------|-----|----|----|--------|-----------------------------------------------------------------------------------------------------------------------------------------------------------|---------|--------|---------|---|---------|--------|
| P63261 ACTG_HUMAN Actin | 19 | Carbamidomethyl+C(2)                           | LCYVALDFEQEMATAAASSSSLEK                 | 215 | 23 | 6  | 23.01  | b4b12b14y7y14°y14                                                                                                                                         | 2550.19 | 96.330 | 3242    | 3 | 850.73  | 5.07   |
| P63261 ACTG_HUMAN Actin | 20 | Carbamidomethyl+C(17)                          | MEEEIAALVIDNGSGMCK                       | 0   | 18 | 3  | 23.67  | y11y13y14                                                                                                                                                 | 1966.90 | 86.427 | 2420    | 2 | 983.95  | 4.53   |
| P63261 ACTG_HUMAN Actin | 21 |                                                | YPIEHGIVTNWDDMEK                         | 68  | 16 | 3  | 23.94  | y3y8y11                                                                                                                                                   | 1946.90 | 53.359 | 1950    | 3 | 649.64  | 1.38   |
| P63261 ACTG_HUMAN Actin | 22 |                                                | VAPEEHPVLLTEAPLNPK                       | 95  | 18 | 33 | 263.71 | b4b5b6b9b10b12°b12b13°<br>b13b16y3*y3y5*y5y6*y6y<br>7*y7y8*y8y9°y9*y9y10y11<br>y12y13y14*y14y15y16°y16<br>y17                                             | 1954.07 | 60.366 | 947764  | 2 | 977.54  | 4.12   |
| P63261 ACTG_HUMAN Actin | 23 | Carbamidomethyl+C(16)                          | EEEEIAALVIDNGSGMCK                       | 1   | 17 | 5  | 37.81  | b5b6b7b14*b14                                                                                                                                             | 1835.85 | 90.433 | 3229    | 3 | 612.62  | -2.06  |
| P63261 ACTG_HUMAN Actin | 24 | Carbamidomethyl+C(3);<br>Carbamidomethyl+C(18) | FRCPEALFQPSFLGMESCGIHETTF<br>NSIMK       | 254 | 30 | 39 | 326.59 | b3b6b7°b7b8b9*b9b10b11<br>*b11b12°b12*b12b14y4y5<br>y6y7y8y9°y9y10*y10y11y<br>12y13y14y15°y15y16y17*y<br>17y18y19y20y21*y21y22°y<br>22                    | 3534.60 | 89.574 | 1689140 | 4 | 884.41  | -7.87  |
| P63261 ACTG_HUMAN Actin | 25 |                                                | IKIIPAPER                                | 326 | 9  | 7  | 73.5   | b4b5y3°y3y4y5y6                                                                                                                                           | 1036.65 | 42.893 | 39897   | 2 | 518.83  | 1.88   |
| P63261 ACTG_HUMAN Actin | 26 |                                                | TTGIVMDSGDGVTHTVPIYEGYA<br>LPHAILRLDLAGR | 147 | 36 | 3  | 10.88  | b8b10y5                                                                                                                                                   | 3808.93 | 88.661 | 4957    | 5 | 762.59  | -9.55  |
| P63261 ACTG_HUMAN Actin | 27 | Carbamidomethyl+C(17);<br>Oxidation+M(16)      | MEEEIAALVIDNGSGMCK                       | 0   | 18 | 4  | 20.44  | b5b17y4y16                                                                                                                                                | 1982.89 | 65.860 | 331379  | 3 | 661.64  | 1.97   |
| P63261 ACTG_HUMAN Actin | 28 | Oxidation+M()                                  | KDLYANTVLSGGTTMYPGIADR                   | 290 | 22 | 3  | 12.79  | b4y7y10                                                                                                                                                   | 2359.15 | 61.951 | 6476    | 3 | 787.06  | -3.83  |
| P63261 ACTG_HUMAN Actin | 29 | Oxidation+M()                                  | HQGVVMGMGQKDSYVGDEAQS<br>K               | 39  | 22 | 8  | 39.91  | b3b5b12y3*y3y7y13y14                                                                                                                                      | 2367.04 | 57.955 | 2278    | 3 | 789.68  | -14.23 |
| P63261 ACTG_HUMAN Actin | 30 |                                                | YVGDEAQSQR                               | 52  | 10 | 2  | 16.88  | b4b9                                                                                                                                                      | 1152.56 | 22.184 | 98315   | 2 | 576.78  | -4.55  |
| P63261 ACTG_HUMAN Actin | 31 |                                                | VGDEAQSQR                                | 53  | 9  | 3  | 34.4   | b3b4b5                                                                                                                                                    | 989.49  | 22.177 | 80783   | 2 | 495.25  | -6.29  |
| P63261 ACTG_HUMAN Actin | 32 |                                                | PSIVHRK                                  | 366 | 7  | 3  | 15.07  | b3°b3b6                                                                                                                                                   | 836.50  | 30.670 | 57421   | 2 | 418.76  | -7.59  |
| P63261 ACTG_HUMAN Actin | 33 |                                                | IAPPERK                                  | 329 | 7  | 0  | 1.35   |                                                                                                                                                           | 810.47  | 25.341 | 34903   | 2 | 405.74  | -10.84 |
| P63261 ACTG_HUMAN Actin | 34 |                                                | SIVGRPR                                  | 32  | 7  | 3  | 30.14  | b3b5b6                                                                                                                                                    | 784.48  | 55.022 | 17190   | 2 | 392.74  | -4.59  |
| P63261 ACTG_HUMAN Actin | 35 |                                                | SFTTTAER                                 | 198 | 8  | 1  | 8      | b3                                                                                                                                                        | 912.44  | 41.821 | 11254   | 1 | 912.44  | 1.47   |
| P63261 ACTG_HUMAN Actin | 36 |                                                | DEAQSQR                                  | 55  | 7  | 5  | 16.88  | b3°b3b5°b5*b5                                                                                                                                             | 833.41  | 22.206 | 3334    | 2 | 417.21  | -2.05  |
| P63261 ACTG_HUMAN Actin | 37 |                                                | QEYDESGSIVHR                             | 359 | 13 | 0  | 3.6    |                                                                                                                                                           | 1499.68 | 36.598 | 15257   | 3 | 500.57  | 6.35   |
| P60709 ACTB_HUMAN Actin | 1  |                                                | AGFAGDDAPR                               | 18  | 10 | 14 | 110.94 | b2b3b4y1y2y3y4y5y6y7°y7<br>y8y9y10                                                                                                                        | 976.44  | 29.683 | 2755233 | 2 | 488.73  | -4.69  |
| P60709 ACTB_HUMAN Actin | 2  |                                                | EITALAPSTMK                              | 315 | 11 | 23 | 119.37 | b1b2°b2b3°b3b4°b4b6y1y2<br>y3°y3y4°y4y5°y5y6°y6y7y8<br>y9°y9y11                                                                                           | 1161.62 | 49.700 | 1560449 | 2 | 581.31  | 3.15   |
| P60709 ACTB_HUMAN Actin | 3  | Carbamidomethyl+C(1);<br>Carbamidomethyl+C(16) | CPEALFQPSFLGMESCGIHETTFNS<br>IMK         | 256 | 28 | 47 | 367.47 | b2b3b4°b4b5b6°b6b7°b7b<br>8°b8b9b10°b10b11b13b14<br>b15°b15b17b28y2y3y4y5y<br>6y8y9y10y12*y12y13°y13y<br>14*y14y15y16y17y18°y18y<br>21y22*y22y23y24y25y28 | 3231.46 | 91.644 | 1492513 | 3 | 1077.83 | 0.83   |
| P60709 ACTB_HUMAN Actin | 4  |                                                | TTGIVMDSGDGVTHTVPIYEGYA<br>LPHAILR       | 147 | 30 | 34 | 244.12 | b2°b2b3°b3b4°b4b6°b6b18<br>b26°b26b30y2y3y5y6y7y8y<br>9y10y11y12y14y15y16y20<br>y22y23y24y25°y25y26y28y<br>30                                             | 3183.59 | 79.352 | 1210757 | 4 | 796.65  | -6.67  |
| P60709 ACTB_HUMAN Actin | 5  |                                                | AVFPSIVGRPR                              | 28  | 11 | 14 | 120.16 | b2b3b9y1y2y3y4y5y6y7y8°<br>y8y9y10                                                                                                                        | 1198.70 | 55.035 | 962517  | 2 | 599.85  | -4.38  |

|                         |    |                      |                                   |     |    |    |        |                                                                                                                      |         |         |        |   |         |        |
|-------------------------|----|----------------------|-----------------------------------|-----|----|----|--------|----------------------------------------------------------------------------------------------------------------------|---------|---------|--------|---|---------|--------|
| P60709 ACTB_HUMAN Actin | 6  |                      | DSYVGDEAQSQR                      | 50  | 12 | 38 | 191.33 | b1b2°b2b3°b3b4b7°b7b8b9<br>b10y1y2y3°y3y4°y4°y4y5°<br>y5*y5y6°y6°y6y7°y7°y7y8<br>°y8*y8y9°y9*y9y10°y10y1<br>1y12*y12 | 1354.62 | 22.176  | 672819 | 2 | 677.81  | -3.87  |
| P60709 ACTB_HUMAN Actin | 7  |                      | DLYANTVLSGGTTMYPGIADR             | 291 | 21 | 25 | 193.84 | b2b4b7b12b14b18°b18y1y<br>2y4y5y6y7y8°y8y9y11y12y<br>13y14°y14y16y17y18y21                                           | 2215.08 | 76.658  | 660153 | 2 | 1108.05 | 6.50   |
| P60709 ACTB_HUMAN Actin | 8  |                      | GYSFTTTAER                        | 196 | 10 | 18 | 116.96 | b2b3°b3b5°b5b9y1y2°y2y3<br>y4°y4y5y6y7°y7y8y10                                                                       | 1132.52 | 41.823  | 633605 | 2 | 566.77  | -3.66  |
| P60709 ACTB_HUMAN Actin | 9  |                      | HQGVMMVGMGQK                      | 39  | 11 | 27 | 193.89 | b1b2*b2b3b4b5b6*b6b7b8<br>*b8b9b10y1y2*y2y3*y3y4<br>*y4y5y6y7y9y10*y10y11                                            | 1171.57 | 31.981  | 467461 | 2 | 586.29  | 0.52   |
| P60709 ACTB_HUMAN Actin | 10 |                      | QEYDESGPSIVHRK                    | 359 | 14 | 19 | 134.71 | b3°b3*b3b14y2y3y4y5y6°y<br>6y7y8y9y10°y10y11y12y14<br>*y14                                                           | 1644.79 | 30.678  | 465849 | 3 | 548.93  | -7.27  |
| P60709 ACTB_HUMAN Actin | 11 |                      | DSYVGDEAQSQR                      | 50  | 11 | 28 | 168.4  | b2°b2b3°b3b6b8b9b10y2°y<br>2y3°y3*y3y4°y4°y4y5°y5°<br>y5y6°y6y7y8°y8y9°y9y10y<br>11                                  | 1198.53 | 24.413  | 318859 | 2 | 599.77  | 4.79   |
| P60709 ACTB_HUMAN Actin | 12 |                      | KDLYANTVLSGGTTMYPGIADR            | 290 | 22 | 36 | 263.78 | b3b4b5b6b7°b7°b7b8°b8°<br>b8b9b11*b11b12b14°b14b<br>15b16°b16b22y1y2y3y4y5<br>y6y7y8y9y10y12y13°y13y1<br>4°y14y22    | 2343.16 | 68.065  | 301965 | 3 | 781.73  | -0.94  |
| P60709 ACTB_HUMAN Actin | 13 |                      | LDLAGRDLTDYLMK                    | 177 | 14 | 10 | 54.29  | b2b3b12y1y2y3y4y11y12y<br>14                                                                                         | 1623.82 | 77.782  | 226010 | 3 | 541.94  | -13.23 |
| P60709 ACTB_HUMAN Actin | 14 |                      | QEYDESGPSIVHR                     | 359 | 13 | 12 | 89.81  | y1y2y3y4y5y6y8y10°y10y1<br>1y13*y13                                                                                  | 1516.69 | 36.606  | 191103 | 3 | 506.24  | -8.05  |
| P60709 ACTB_HUMAN Actin | 15 |                      | IIAPPERK                          | 328 | 8  | 13 | 73.06  | b2b3y1y2y3°y3y4°y4y5°y5<br>y6y7y8                                                                                    | 923.56  | 25.342  | 126049 | 2 | 462.28  | -10.05 |
| P60709 ACTB_HUMAN Actin | 16 | Carbamidomethyl+C(1) | CDVDIRK                           | 284 | 7  | 13 | 77.38  | b1b2°b2b3b4y2y3y4°y4y5y<br>6°y6y7                                                                                    | 905.44  | 21.103  | 22589  | 2 | 453.22  | -12.13 |
| P60709 ACTB_HUMAN Actin | 17 |                      | YSVWIGGSILASLSTFQQMWISK           | 336 | 23 | 11 | 67.64  | b3b4°b4b7b9b10y2y5y6y7<br>y23                                                                                        | 2602.36 | 136.428 | 14063  | 3 | 868.12  | 8.26   |
| P60709 ACTB_HUMAN Actin | 18 |                      | MTQIMFETFNTPAMYVAIQAVLSL<br>YASGR | 118 | 29 | 6  | 21.33  | b4°b4b5b14y1y3                                                                                                       | 3253.62 | 136.574 | 5015   | 3 | 1085.21 | 4.35   |
| P60709 ACTB_HUMAN Actin | 19 | Carbamidomethyl+C(2) | LCYVALDFEQEMATAASSSSLEK           | 215 | 23 | 6  | 23.01  | b4b12b14y7y14°y14                                                                                                    | 2550.19 | 96.330  | 3242   | 3 | 850.73  | 5.07   |
| P60709 ACTB_HUMAN Actin | 20 |                      | YPIEHGIVTNWDDMEK                  | 68  | 16 | 3  | 23.94  | y3y8y11                                                                                                              | 1946.90 | 53.359  | 1950   | 3 | 649.64  | 1.38   |
| P60709 ACTB_HUMAN Actin | 21 |                      | GILTLK                            | 62  | 6  | 8  | 64.18  | b3b4°b4b5°b5y3y4°y4                                                                                                  | 644.43  | 52.004  | 217148 | 1 | 644.43  | -1.42  |
| P60709 ACTB_HUMAN Actin | 22 | Carbamidomethyl+C(1) | CDVDIR                            | 284 | 6  | 9  | 64.18  | b3°b3b4y3°y3y4°y4y5°y5                                                                                               | 777.35  | 27.225  | 62597  | 2 | 389.18  | -7.77  |
| P60709 ACTB_HUMAN Actin | 23 |                      | RGILTLK                           | 61  | 7  | 5  | 48.87  | b4b5°b5b6y4                                                                                                          | 800.52  | 45.087  | 392068 | 2 | 400.77  | -13.95 |
| P60709 ACTB_HUMAN Actin | 24 |                      | DSYVGDEAQSQR                      | 50  | 12 | 11 | 98.13  | b3b6y3y4°y4y5°y5y7°y7y9<br>y11                                                                                       | 1354.61 | 21.628  | 138526 | 2 | 677.81  | -9.82  |
| P60709 ACTB_HUMAN Actin | 25 | Carbamidomethyl+C(4) | EKLCYVALDFEQEMATAASSSSLE<br>K     | 213 | 25 | 21 | 168.44 | b10b11b12*b12b13b14b23<br>y3y4y5y6y9y10y11°y11y12<br>y14°y14y16°y16y17                                               | 2807.33 | 91.603  | 48951  | 2 | 1404.17 | 5.74   |
| P60709 ACTB_HUMAN Actin | 26 |                      | DLYANTVLSGGTTMYPGIADRMQ<br>K      | 291 | 24 | 8  | 27.23  | b4b5b10°b10b14°b14y11°y<br>11                                                                                        | 2602.24 | 107.327 | 14579  | 4 | 651.31  | -10.51 |
| P60709 ACTB_HUMAN Actin | 27 |                      | IIAPPERK                          | 328 | 8  | 3  | 31.81  | b3y6y7                                                                                                               | 923.57  | 36.048  | 12944  | 2 | 462.29  | 3.37   |

|                                                                             |    |                                                                  |                                         |     |    |    |        |                                                                                                                             |         |         |        |   |         |        |
|-----------------------------------------------------------------------------|----|------------------------------------------------------------------|-----------------------------------------|-----|----|----|--------|-----------------------------------------------------------------------------------------------------------------------------|---------|---------|--------|---|---------|--------|
| P60709 ACTB_HUMAN Actin                                                     | 28 |                                                                  | YSVWIGGSILASLSTFQQMWSKQ<br>EYDESGPSIVHR | 336 | 36 | 3  | 10.88  | b4b15y11                                                                                                                    | 4099.99 | 83.719  | 3376   | 3 | 1367.34 | -7.26  |
| P60709 ACTB_HUMAN Actin                                                     | 29 |                                                                  | HQGVVMVGMGQKDSYVGDEAQS<br>K             | 39  | 22 | 8  | 46.74  | b3b10b11b12*b12b17y10y<br>12                                                                                                | 2351.08 | 63.588  | 1894   | 3 | 784.37  | 2.28   |
| P60709 ACTB_HUMAN Actin                                                     | 30 | Phosphoryl.STY()                                                 | VAPEEHPVLLTEAPLNPK                      | 95  | 18 | 3  | 14.75  | b9b11y14                                                                                                                    | 2034.03 | 59.189  | 11129  | 2 | 1017.52 | 5.34   |
| P60709 ACTB_HUMAN Actin                                                     | 31 | Oxidation+M()                                                    | TTGIVMDSGDGVTHTVPIYEGYA<br>LPHAILR      | 147 | 30 | 6  | 24.35  | b6b11b12*b12b22y6                                                                                                           | 3199.60 | 76.255  | 87813  | 4 | 800.65  | -3.89  |
| P60709 ACTB_HUMAN Actin                                                     | 32 | Carbamidomethyl+C(1);<br>Carbamidomethyl+C(16)<br>;Oxidation+M() | CPEALFQPSFLGMESCGIHETTFNS<br>IMK        | 256 | 28 | 4  | 21.48  | b3b5b6y8                                                                                                                    | 3247.47 | 86.715  | 51365  | 3 | 1083.16 | 5.04   |
| P60709 ACTB_HUMAN Actin                                                     | 33 | Oxidation+M()                                                    | DLYANTVLSGGTTMYPGIADR                   | 291 | 21 | 5  | 23.54  | b9b10b15*b15y14                                                                                                             | 2231.08 | 76.446  | 36785  | 2 | 1116.04 | 7.55   |
| P60709 ACTB_HUMAN Actin                                                     | 34 |                                                                  | AGDDAPR                                 | 21  | 7  | 4  | 35.72  | b3b4b5*b5                                                                                                                   | 701.33  | 29.674  | 93233  | 1 | 701.33  | 6.18   |
| P60709 ACTB_HUMAN Actin                                                     | 35 |                                                                  | GPSIVHRK                                | 365 | 8  | 3  | 15.07  | b3*b3b6                                                                                                                     | 893.53  | 30.673  | 82912  | 2 | 447.27  | -3.28  |
| P60709 ACTB_HUMAN Actin                                                     | 36 |                                                                  | VFPSIVGRPR                              | 29  | 10 | 0  | 2.7    |                                                                                                                             | 1127.67 | 55.049  | 82638  | 2 | 564.34  | 0.54   |
| P60709 ACTB_HUMAN Actin                                                     | 37 |                                                                  | SGPSIVHRK                               | 364 | 9  | 2  | 7.25   | b3*b3                                                                                                                       | 980.56  | 30.668  | 74478  | 2 | 490.78  | -1.43  |
| P60709 ACTB_HUMAN Actin                                                     | 38 |                                                                  | FAGDDAPR                                | 20  | 8  | 0  | 2.25   |                                                                                                                             | 848.39  | 29.652  | 64797  | 2 | 424.70  | -2.81  |
| P60709 ACTB_HUMAN Actin                                                     | 39 |                                                                  | GFAGDDAPR                               | 19  | 9  | 1  | 8      | b4                                                                                                                          | 905.41  | 29.649  | 35919  | 2 | 453.21  | 2.43   |
| P60709 ACTB_HUMAN Actin                                                     | 40 |                                                                  | QIMFETFPAMYVAIQAVLSLYA<br>SGR           | 120 | 27 | 1  | 9.74   | b12                                                                                                                         | 3021.56 | 136.629 | 31395  | 3 | 1007.86 | 11.39  |
| P60709 ACTB_HUMAN Actin                                                     | 41 |                                                                  | TALAPSTMK                               | 317 | 9  | 0  | 2.7    |                                                                                                                             | 919.50  | 49.716  | 21316  | 1 | 919.50  | 4.78   |
| P60709 ACTB_HUMAN Actin                                                     | 42 |                                                                  | LAPSTMK                                 | 319 | 7  | 1  | 7.66   | b4                                                                                                                          | 747.41  | 49.734  | 15787  | 1 | 747.41  | 2.53   |
| P60709 ACTB_HUMAN Actin                                                     | 43 |                                                                  | MVGMGQK                                 | 43  | 7  | 0  | 2.7    |                                                                                                                             | 750.37  | 31.943  | 12827  | 1 | 750.37  | 3.99   |
| P60709 ACTB_HUMAN Actin                                                     | 44 |                                                                  | YDESGPSIVHR                             | 361 | 11 | 0  | 3.6    |                                                                                                                             | 1259.59 | 36.639  | 4274   | 2 | 630.30  | -6.20  |
| P60709 ACTB_HUMAN Actin                                                     | 45 |                                                                  | VGDEAQS                                 | 53  | 8  | 3  | 18.19  | b3*b3b6                                                                                                                     | 833.40  | 24.399  | 3915   | 1 | 833.40  | 5.79   |
| P60709 ACTB_HUMAN Actin                                                     | 46 |                                                                  | YDESGPSIVHRK                            | 361 | 12 | 1  | 7.25   | b9                                                                                                                          | 1387.69 | 30.692  | 2826   | 2 | 694.35  | -7.57  |
| P60709 ACTB_HUMAN Actin                                                     | 47 |                                                                  | QEYDESGPSIVHRK                          | 359 | 14 | 0  | 4.05   |                                                                                                                             | 1626.77 | 30.684  | 25557  | 4 | 407.45  | -8.70  |
| P60709 ACTB_HUMAN Actin                                                     | 48 |                                                                  | GYSFTTTAER                              | 196 | 10 | 0  | 2.25   |                                                                                                                             | 1114.52 | 41.847  | 16823  | 2 | 557.77  | 11.72  |
| Q9H299 SH3L3_HUMAN SH3 domain-<br>binding glutamic acid-rich-like protein 3 | 1  |                                                                  | IYQLVDISQDNALR                          | 32  | 15 | 6  | 28     | b4y2y4*y6y7y13                                                                                                              | 1775.91 | 69.569  | 82394  | 2 | 888.46  | -11.07 |
| Q9H299 SH3L3_HUMAN SH3 domain-<br>binding glutamic acid-rich-like protein 3 | 2  | Carbamidomethyl+C(13)                                            | ATPPQIVNGDQYCGDYELFVEAV<br>EQNTLQEFK    | 58  | 33 | 38 | 217.57 | b2b6*b6b7*b7b8*b8b9b11<br>*b11*b11b12*b12b14*b14b<br>15b16y1y2y3y4*y4y5*y5y6<br>y7y8y9*y9y10*y10y11*y11<br>y12y13*y13y23y33 | 3815.83 | 116.634 | 47333  | 3 | 1272.61 | 4.22   |
| Q9H299 SH3L3_HUMAN SH3 domain-<br>binding glutamic acid-rich-like protein 3 | 3  |                                                                  | VYSTSVTGS                               | 5   | 10 | 14 | 67.93  | b2b5b8*b8y1y2y6*y6y7*y7<br>y8y9*y9y10                                                                                       | 1056.53 | 26.411  | 42638  | 2 | 528.77  | 1.39   |
| Q9H299 SH3L3_HUMAN SH3 domain-<br>binding glutamic acid-rich-like protein 3 | 4  |                                                                  | MSGLR                                   | 0   | 5  | 2  | 12.75  | b4*b4                                                                                                                       | 563.29  | 49.709  | 24734  | 1 | 563.29  | -12.57 |
| Q9H299 SH3L3_HUMAN SH3 domain-<br>binding glutamic acid-rich-like protein 3 | 5  |                                                                  | SQSEVTR                                 | 18  | 8  | 6  | 46.31  | b3*b3b4*b4y4y5                                                                                                              | 934.45  | 27.701  | 3234   | 2 | 467.73  | -4.44  |
| Q9H299 SH3L3_HUMAN SH3 domain-<br>binding glutamic acid-rich-like protein 3 | 6  |                                                                  | MSGLRVYSTSVTGS                          | 0   | 15 | 3  | 17.17  | b7b9y4                                                                                                                      | 1600.82 | 102.442 | 3253   | 2 | 800.91  | 3.20   |
| Q562R1 ACTBL_HUMAN Beta-actin-like<br>protein 2                             | 1  |                                                                  | HQGVVMVGMGQK                            | 40  | 11 | 27 | 193.89 | b1b2*b2b3b4b5b6*b6b7b8<br>*b8b9b10y1y2*y2y3*y3y4<br>*y4y5y6y7y9y10*y10y11                                                   | 1171.57 | 31.981  | 467461 | 2 | 586.29  | 0.52   |
| Q562R1 ACTBL_HUMAN Beta-actin-like<br>protein 2                             | 2  |                                                                  | LDLAGRDLDYLMK                           | 178 | 14 | 10 | 54.29  | b2b3b12y1y2y3y4y11y12y<br>14                                                                                                | 1623.82 | 77.782  | 226010 | 3 | 541.94  | -13.23 |
| Q562R1 ACTBL_HUMAN Beta-actin-like<br>protein 2                             | 3  |                                                                  | IIAPPERK                                | 329 | 8  | 13 | 73.06  | b2b3y1y2y3*y3y4*y4y5*y5<br>y6y7y8                                                                                           | 923.56  | 25.342  | 126049 | 2 | 462.28  | -10.05 |

|                                               |    |                                          |                                  |     |    |    |        |                                                                                                                                                                                                                                                                               |         |         |         |   |         |        |
|-----------------------------------------------|----|------------------------------------------|----------------------------------|-----|----|----|--------|-------------------------------------------------------------------------------------------------------------------------------------------------------------------------------------------------------------------------------------------------------------------------------|---------|---------|---------|---|---------|--------|
| [Q562R1 ACTBL_HUMAN Beta-actin-like protein 2 | 4  | Carbamidomethyl+C(1)                     | CDVDIRK                          | 285 | 7  | 13 | 77.38  | b1b2 <sup>o</sup> b2b3b4y2y3y4 <sup>o</sup> y4y5y6 <sup>o</sup> y6y7                                                                                                                                                                                                          | 905.44  | 21.103  | 22589   | 2 | 453.22  | -12.13 |
| [Q562R1 ACTBL_HUMAN Beta-actin-like protein 2 | 5  |                                          | YSVWIGGSILASLSTFQQMWISK          | 337 | 23 | 11 | 67.64  | b3b4 <sup>b</sup> b4b7b9b10y2y5y6y7y23                                                                                                                                                                                                                                        | 2602.36 | 136.428 | 14063   | 3 | 868.12  | 8.26   |
| [Q562R1 ACTBL_HUMAN Beta-actin-like protein 2 | 6  |                                          | KDLYANTVLSGGSTMYPGIADR           | 291 | 22 | 7  | 37.68  | b5b10b11y2y3y4y15                                                                                                                                                                                                                                                             | 2329.13 | 79.326  | 4518    | 4 | 583.04  | -8.60  |
| [Q562R1 ACTBL_HUMAN Beta-actin-like protein 2 | 7  | Carbamidomethyl+C(2)                     | DCYVGDEAQSKR                     | 51  | 12 | 4  | 21.17  | b10y5y8 <sup>*</sup> y8                                                                                                                                                                                                                                                       | 1427.63 | 38.731  | 2346    | 2 | 714.32  | 2.74   |
| [Q562R1 ACTBL_HUMAN Beta-actin-like protein 2 | 8  | Carbamidomethyl+C(2)                     | LCYVALDFEQEMVR                   | 216 | 14 | 6  | 37.87  | b2b3b9b11y6y10                                                                                                                                                                                                                                                                | 1772.83 | 111.147 | 2124    | 2 | 886.92  | -5.16  |
| [Q562R1 ACTBL_HUMAN Beta-actin-like protein 2 | 9  |                                          | MTQMFEAFNTPAMYVAIQAVLS<br>LYASGR | 119 | 29 | 4  | 21.61  | b3b4 <sup>*</sup> b4y5                                                                                                                                                                                                                                                        | 3223.60 | 71.838  | 9389    | 4 | 806.66  | 0.76   |
| [Q562R1 ACTBL_HUMAN Beta-actin-like protein 2 | 10 |                                          | AGFGGDDAPR                       | 19  | 10 | 7  | 39.43  | b5b8 <sup>b</sup> b8y7 <sup>y</sup> y7y8 <sup>o</sup> y8                                                                                                                                                                                                                      | 962.44  | 27.148  | 7291    | 2 | 481.72  | 7.99   |
| [Q562R1 ACTBL_HUMAN Beta-actin-like protein 2 | 11 |                                          | IWYHTFYNELR                      | 85  | 11 | 6  | 36.69  | b9b10 <sup>b</sup> b10y5 <sup>y</sup> y5y10                                                                                                                                                                                                                                   | 1541.73 | 72.308  | 4351    | 3 | 514.58  | -13.54 |
| [Q562R1 ACTBL_HUMAN Beta-actin-like protein 2 | 12 |                                          | DLYANTVLSGGSTMYPGIADR            | 292 | 21 | 5  | 20.53  | b15 <sup>b</sup> b15y8y10y16                                                                                                                                                                                                                                                  | 2201.09 | 63.846  | 2958    | 3 | 734.37  | 17.97  |
| [Q562R1 ACTBL_HUMAN Beta-actin-like protein 2 | 13 |                                          | AVFPSMIGRPR                      | 29  | 11 | 4  | 23.16  | b6y7 <sup>y</sup> y7y10                                                                                                                                                                                                                                                       | 1230.66 | 55.201  | 2663    | 3 | 410.89  | -15.87 |
| [Q562R1 ACTBL_HUMAN Beta-actin-like protein 2 | 14 | Carbamidomethyl+C(17)                    | TDNELSALVVDNGSGMCK               | 1   | 18 | 7  | 29.21  | b5b7y3y12 <sup>*</sup> y12y14 <sup>y</sup> y14                                                                                                                                                                                                                                | 1909.86 | 86.234  | 2436    | 2 | 955.43  | -0.96  |
| [Q562R1 ACTBL_HUMAN Beta-actin-like protein 2 | 15 |                                          | GYNFTTTAER                       | 197 | 10 | 7  | 53.43  | b5 <sup>b</sup> b5b6b7 <sup>b</sup> b7y5y9                                                                                                                                                                                                                                    | 1159.56 | 23.509  | 2376    | 2 | 580.28  | 17.58  |
| [Q562R1 ACTBL_HUMAN Beta-actin-like protein 2 | 16 |                                          | GVLTLKYPIEHGVVTNWDDMEK           | 63  | 22 | 4  | 34.55  | b3b4y12y13                                                                                                                                                                                                                                                                    | 2544.26 | 68.576  | 238613  | 3 | 848.76  | -9.21  |
| [Q562R1 ACTBL_HUMAN Beta-actin-like protein 2 | 17 |                                          | DLYANTVLSGGSTMYPGIADRMQ<br>K     | 292 | 24 | 5  | 22.4   | b8y5 <sup>y</sup> y5y6y11                                                                                                                                                                                                                                                     | 2588.28 | 76.913  | 6257    | 2 | 1294.64 | 11.60  |
| [Q562R1 ACTBL_HUMAN Beta-actin-like protein 2 | 18 |                                          | ILTERGYNFTTTAER                  | 192 | 15 | 4  | 23.19  | b12 <sup>*</sup> b12y6y7                                                                                                                                                                                                                                                      | 1771.89 | 102.603 | 6121    | 2 | 886.45  | -1.93  |
| [Q562R1 ACTBL_HUMAN Beta-actin-like protein 2 | 19 | Carbamidomethyl+C(2)                     | LCYVALDFEQEMVRAAASSSPER          | 216 | 23 | 4  | 12.44  | b4b10 <sup>b</sup> b10y6                                                                                                                                                                                                                                                      | 2629.25 | 95.393  | 2488    | 4 | 658.07  | 2.51   |
| [Q562R1 ACTBL_HUMAN Beta-actin-like protein 2 | 20 |                                          | KDLYANTVLSGGSTMYPGIADR           | 291 | 22 | 4  | 19.3   | y7y14 <sup>y</sup> y14y21                                                                                                                                                                                                                                                     | 2329.14 | 87.587  | 2177    | 2 | 1165.07 | -5.24  |
| [Q562R1 ACTBL_HUMAN Beta-actin-like protein 2 | 21 | Carbamidomethyl+C(4)                     | EKLCYVALDFEQEMVR                 | 214 | 16 | 12 | 60.46  | b5b7b11y7 <sup>y</sup> y7y8 <sup>y</sup> y8y10 <sup>*</sup> y10y11 <sup>y</sup> y11 <sup>*</sup> y11                                                                                                                                                                          | 2029.94 | 128.367 | 1811    | 2 | 1015.48 | -13.83 |
| [Q562R1 ACTBL_HUMAN Beta-actin-like protein 2 | 22 | Phosphoryl STY(4)                        | EIITLAPSTMK                      | 316 | 11 | 3  | 30.14  | y5_H3PO4 y5y6y9                                                                                                                                                                                                                                                               | 1283.62 | 90.521  | 2053    | 2 | 642.31  | -0.57  |
| [Q562R1 ACTBL_HUMAN Beta-actin-like protein 2 | 23 | Carbamidomethyl+C(13);<br>Oxidation+M(8) | HQGVMVGMGQKDCYVGDEAQS<br>K       | 40  | 22 | 5  | 34.56  | b3b4b5y5 <sup>y</sup> y5                                                                                                                                                                                                                                                      | 2440.07 | 37.220  | 2984    | 5 | 488.82  | -0.70  |
| [Q562R1 ACTBL_HUMAN Beta-actin-like protein 2 | 24 | Carbamidomethyl+C(1);<br>Oxidation+M(27) | CPEAIFQPSFLGIESSGHETTFNSI<br>MK  | 257 | 28 | 6  | 16.47  | b5y8 <sup>*</sup> y8y10y12 <sup>o</sup> y12                                                                                                                                                                                                                                   | 3156.46 | 94.379  | 1524    | 3 | 1052.83 | -12.14 |
| [Q562R1 ACTBL_HUMAN Beta-actin-like protein 2 | 25 |                                          | KDLYANTVLSG                      | 291 | 11 | 1  | 8.09   | y3                                                                                                                                                                                                                                                                            | 1180.61 | 79.278  | 10323   | 2 | 590.81  | -6.41  |
| [P62736 ACTA_HUMAN Actin                      | 1  |                                          | AGFAGDDAPR                       | 20  | 10 | 14 | 110.94 | b2b3b4y1y2y3y4y5y6y7 <sup>o</sup> y7y8y9y10                                                                                                                                                                                                                                   | 976.44  | 29.683  | 2755233 | 2 | 488.73  | -4.69  |
| [P62736 ACTA_HUMAN Actin                      | 2  |                                          | YPIEHGITNWDDMEK                  | 70  | 16 | 35 | 208.62 | b2b3b6b8b9 <sup>b</sup> b9b11 <sup>b</sup> b11 <sup>*</sup> b11b13 <sup>*</sup> b13b14b16 <sup>*</sup> b16y1y2 <sup>y</sup> y2y3y4y5 <sup>y</sup> y5y6y7 <sup>*</sup> y7y8 <sup>*</sup> y8y12y13 <sup>y</sup> y13 <sup>*</sup> y13y14y15 <sup>*</sup> y15y16 <sup>*</sup> y16 | 1960.90 | 65.857  | 2453544 | 3 | 654.31  | -4.30  |
| [P62736 ACTA_HUMAN Actin                      | 3  |                                          | EITALAPSTMK                      | 317 | 11 | 23 | 119.37 | b1b2 <sup>b</sup> b2b3 <sup>b</sup> b3b4 <sup>b</sup> b4b6y1y2y3 <sup>y</sup> y3y4 <sup>y</sup> y4y5 <sup>y</sup> y5y6 <sup>y</sup> y6y7y8y9 <sup>y</sup> y9y11                                                                                                               | 1161.62 | 49.700  | 1560449 | 2 | 581.31  | 3.15   |
| [P62736 ACTA_HUMAN Actin                      | 4  |                                          | AVFPSIVGRPR                      | 30  | 11 | 14 | 120.16 | b2b3b9y1y2y3y4y5y6y7y8 <sup>o</sup> y8y9y10                                                                                                                                                                                                                                   | 1198.70 | 55.035  | 962517  | 2 | 599.85  | -4.38  |

|                         |    |                                        |                         |     |    |    |        |                                                                                                                      |         |         |         |   |        |        |
|-------------------------|----|----------------------------------------|-------------------------|-----|----|----|--------|----------------------------------------------------------------------------------------------------------------------|---------|---------|---------|---|--------|--------|
| P62736 ACTA_HUMAN Actin | 5  |                                        | DSYVGDEAQSQR            | 52  | 12 | 38 | 191.33 | b1b2°b2b3°b3b4b7°b7b8b9<br>b10y1y2y3°y3y4°y4*y4y5°<br>y5*y5y6°y6*y6y7°y7*y7y8<br>°y8*y8y9°y9*y9y10°y10y1<br>1y12*y12 | 1354.62 | 22.176  | 672819  | 2 | 677.81 | -3.87  |
| P62736 ACTA_HUMAN Actin | 6  |                                        | HQGVMVGMGQK             | 41  | 11 | 27 | 193.89 | b1b2*b2b3b4b5b6*b6b7b8<br>*b8b9b10y1y2*y2y3*y3y4<br>*y4y5y6y7y9y10*y10y11                                            | 1171.57 | 31.981  | 467461  | 2 | 586.29 | 0.52   |
| P62736 ACTA_HUMAN Actin | 7  |                                        | DSYVGDEAQSQR            | 52  | 11 | 28 | 168.4  | b2°b2b3°b3b6b8b9b10y2°y<br>2y3°y3*y3y4°y4*y4y5°y5*<br>y5y6*y6y7y8°y8y9*y9y10y<br>11                                  | 1198.53 | 24.413  | 318859  | 2 | 599.77 | 4.79   |
| P62736 ACTA_HUMAN Actin | 8  |                                        | LDLAGRDLTDYLMK          | 179 | 14 | 10 | 54.29  | b2b3b12y1y2y3y4y11y12y<br>14                                                                                         | 1623.82 | 77.782  | 226010  | 3 | 541.94 | -13.23 |
| P62736 ACTA_HUMAN Actin | 9  |                                        | IIAPPERK                | 330 | 8  | 13 | 73.06  | b2b3y1y2y3°y3y4°y4y5°y5<br>y6y7y8                                                                                    | 923.56  | 25.342  | 126049  | 2 | 462.28 | -10.05 |
| P62736 ACTA_HUMAN Actin | 10 |                                        | YSVWIGGSILASLSTFQQMWISK | 338 | 23 | 11 | 67.64  | b3b4°b4b7b9b10y2y5y6y7<br>y23                                                                                        | 2602.36 | 136.428 | 14063   | 3 | 868.12 | 8.26   |
| P62736 ACTA_HUMAN Actin | 11 | Oxidation+M()                          | YPIEHGITNWDDMEK         | 70  | 16 | 3  | 16.24  | b5y11y13                                                                                                             | 1976.91 | 66.662  | 13967   | 3 | 659.64 | -0.19  |
| P62736 ACTA_HUMAN Actin | 12 | Carbamidomethyl+C(2);<br>Oxidation+M() | LCYVALDFENEMATAASSSSLEK | 217 | 23 | 3  | 12.44  | b3b5y14                                                                                                              | 2552.16 | 98.179  | 9799    | 3 | 851.39 | 2.87   |
| P62736 ACTA_HUMAN Actin | 13 | Oxidation+M(1)                         | MQKEITALAPSTMK          | 314 | 14 | 4  | 30.05  | b8b11b13y7                                                                                                           | 1564.82 | 105.179 | 5259    | 2 | 782.91 | 6.40   |
| P62736 ACTA_HUMAN Actin | 14 | Oxidation+M()                          | KDLYANNVLSGGTTMPGIADR   | 292 | 22 | 3  | 12.79  | b14y7y18                                                                                                             | 2372.17 | 91.463  | 2857    | 3 | 791.39 | 5.76   |
| P68032 ACTC_HUMAN Actin | 1  |                                        | AGFAGDDAPR              | 20  | 10 | 14 | 110.94 | b2b3b4y1y2y3y4y5y6y7°y7<br>y8y9y10                                                                                   | 976.44  | 29.683  | 2755233 | 2 | 488.73 | -4.69  |
| P68032 ACTC_HUMAN Actin | 2  |                                        | YPIEHGITNWDDMEK         | 70  | 16 | 35 | 208.62 | b2b3b6b8b9°b9b11°b11*b<br>11b13°b13b14b16°b16y1y<br>2°y2y3y4y5°y5y6y7*y7y8*<br>y8y12y13°y13*y13y14y15*<br>y15y16*y16 | 1960.90 | 65.857  | 2453544 | 3 | 654.31 | -4.30  |
| P68032 ACTC_HUMAN Actin | 3  |                                        | EITALAPSTMK             | 317 | 11 | 23 | 119.37 | b1b2°b2b3°b3b4°b4b6y1y2<br>y3°y3y4°y4y5°y5y6°y6y7y8<br>y9°y9y11                                                      | 1161.62 | 49.700  | 1560449 | 2 | 581.31 | 3.15   |
| P68032 ACTC_HUMAN Actin | 4  |                                        | AVFPSIVGRPR             | 30  | 11 | 14 | 120.16 | b2b3b9y1y2y3y4y5y6y7y8°<br>y8y9y10                                                                                   | 1198.70 | 55.035  | 962517  | 2 | 599.85 | -4.38  |
| P68032 ACTC_HUMAN Actin | 5  |                                        | DSYVGDEAQSQR            | 52  | 12 | 38 | 191.33 | b1b2°b2b3°b3b4b7°b7b8b9<br>b10y1y2y3°y3y4°y4*y4y5°<br>y5*y5y6°y6*y6y7°y7*y7y8<br>°y8*y8y9°y9*y9y10°y10y1<br>1y12*y12 | 1354.62 | 22.176  | 672819  | 2 | 677.81 | -3.87  |
| P68032 ACTC_HUMAN Actin | 6  |                                        | HQGVMVGMGQK             | 41  | 11 | 27 | 193.89 | b1b2*b2b3b4b5b6*b6b7b8<br>*b8b9b10y1y2*y2y3*y3y4<br>*y4y5y6y7y9y10*y10y11                                            | 1171.57 | 31.981  | 467461  | 2 | 586.29 | 0.52   |
| P68032 ACTC_HUMAN Actin | 7  |                                        | DSYVGDEAQSQR            | 52  | 11 | 28 | 168.4  | b2°b2b3°b3b6b8b9b10y2°y<br>2y3°y3*y3y4°y4*y4y5°y5*<br>y5y6*y6y7y8°y8y9*y9y10y<br>11                                  | 1198.53 | 24.413  | 318859  | 2 | 599.77 | 4.79   |
| P68032 ACTC_HUMAN Actin | 8  |                                        | LDLAGRDLTDYLMK          | 179 | 14 | 10 | 54.29  | b2b3b12y1y2y3y4y11y12y<br>14                                                                                         | 1623.82 | 77.782  | 226010  | 3 | 541.94 | -13.23 |
| P68032 ACTC_HUMAN Actin | 9  |                                        | IIAPPERK                | 330 | 8  | 13 | 73.06  | b2b3y1y2y3°y3y4°y4y5°y5<br>y6y7y8                                                                                    | 923.56  | 25.342  | 126049  | 2 | 462.28 | -10.05 |
| P68032 ACTC_HUMAN Actin | 10 |                                        | YSVWIGGSILASLSTFQQMWISK | 338 | 23 | 11 | 67.64  | b3b4°b4b7b9b10y2y5y6y7<br>y23                                                                                        | 2602.36 | 136.428 | 14063   | 3 | 868.12 | 8.26   |

|                         |    |                                                |                                         |     |    |    |        |                                                                                                                                                                                                                                                                                                                              |         |         |         |   |         |        |
|-------------------------|----|------------------------------------------------|-----------------------------------------|-----|----|----|--------|------------------------------------------------------------------------------------------------------------------------------------------------------------------------------------------------------------------------------------------------------------------------------------------------------------------------------|---------|---------|---------|---|---------|--------|
| P68032 ACTC_HUMAN Actin | 11 |                                                | YSVWIGGSILASLSTFQQMWSKQ<br>EYDEAGPSIVHR | 338 | 36 | 4  | 23.77  | b3b15y10y11                                                                                                                                                                                                                                                                                                                  | 4084.02 | 116.184 | 2322    | 6 | 681.51  | -1.91  |
| P68032 ACTC_HUMAN Actin | 12 | Carbamidomethyl+C(1);<br>Phosphoryl STY()      | CPETLFQPSFIGMESAGIHETTYNS<br>IMK        | 258 | 28 | 6  | 24.21  | b4b10y4 <sup>°</sup> y4y5y24                                                                                                                                                                                                                                                                                                 | 3268.40 | 104.161 | 31690   | 3 | 1090.14 | -9.71  |
| P68032 ACTC_HUMAN Actin | 13 | Phosphoryl STY()                               | MQKEITALAPSTMK                          | 314 | 14 | 3  | 18.27  | b9b11y10                                                                                                                                                                                                                                                                                                                     | 1628.76 | 31.184  | 1874    | 2 | 814.88  | -5.55  |
| P68133 ACTS_HUMAN Actin | 1  |                                                | AGFAGDDAPR                              | 20  | 10 | 14 | 110.94 | b2b3b4y1y2y3y4y5y6y7 <sup>°</sup> y7<br>y8y9y10                                                                                                                                                                                                                                                                              | 976.44  | 29.683  | 2755233 | 2 | 488.73  | -4.69  |
| P68133 ACTS_HUMAN Actin | 2  |                                                | YPIEHGITNWDDMEK                         | 70  | 16 | 35 | 208.62 | b2b3b6b8b9 <sup>°</sup> b9b11 <sup>°</sup> b11 <sup>°</sup> b<br>11b13 <sup>°</sup> b13b14b16 <sup>°</sup> b16y1y<br>2 <sup>°</sup> y2y3y4y5 <sup>°</sup> y5y6y7 <sup>°</sup> y7y8 <sup>°</sup><br>y8y12y13 <sup>°</sup> y13 <sup>°</sup> y13 <sup>°</sup> y13y14y15 <sup>°</sup><br>y15y16 <sup>°</sup> y16                 | 1960.90 | 65.857  | 2453544 | 3 | 654.31  | -4.30  |
| P68133 ACTS_HUMAN Actin | 3  |                                                | EITALAPSTMK                             | 317 | 11 | 23 | 119.37 | b1b2 <sup>°</sup> b2b3 <sup>°</sup> b3b4 <sup>°</sup> b4b6y1y2<br>y3 <sup>°</sup> y3y4 <sup>°</sup> y4y5 <sup>°</sup> y5y6 <sup>°</sup> y6y7y8<br>y9 <sup>°</sup> y9y11                                                                                                                                                      | 1161.62 | 49.700  | 1560449 | 2 | 581.31  | 3.15   |
| P68133 ACTS_HUMAN Actin | 4  |                                                | AVFPSIVGRPR                             | 30  | 11 | 14 | 120.16 | b2b3b9y1y2y3y4y5y6y7y8 <sup>°</sup><br>y8y9y10                                                                                                                                                                                                                                                                               | 1198.70 | 55.035  | 962517  | 2 | 599.85  | -4.38  |
| P68133 ACTS_HUMAN Actin | 5  |                                                | DSYVGDEAQSQR                            | 52  | 12 | 38 | 191.33 | b1b2 <sup>°</sup> b2b3 <sup>°</sup> b3b4b7 <sup>°</sup> b7b8b9<br>b10y1y2y3 <sup>°</sup> y3y4 <sup>°</sup> y4y5 <sup>°</sup><br>y5 <sup>°</sup> y5y6 <sup>°</sup> y6 <sup>°</sup> y6y7 <sup>°</sup> y7y8 <sup>°</sup><br>y8 <sup>°</sup> y8y9 <sup>°</sup> y9 <sup>°</sup> y9y10 <sup>°</sup> y10y1<br>1y12 <sup>°</sup> y12 | 1354.62 | 22.176  | 672819  | 2 | 677.81  | -3.87  |
| P68133 ACTS_HUMAN Actin | 6  |                                                | HQGVVMGMGQK                             | 41  | 11 | 27 | 193.89 | b1b2 <sup>°</sup> b2b3b4b5b6 <sup>°</sup> b6b7b8<br><sup>°</sup> b8b9b10y1y2 <sup>°</sup> y2y3 <sup>°</sup> y3y4<br><sup>°</sup> y4y5y6y7y9y10 <sup>°</sup> y10y11                                                                                                                                                           | 1171.57 | 31.981  | 467461  | 2 | 586.29  | 0.52   |
| P68133 ACTS_HUMAN Actin | 7  |                                                | DSYVGDEAQSQR                            | 52  | 11 | 28 | 168.4  | b2 <sup>°</sup> b2b3 <sup>°</sup> b3b6b8b9b10y2 <sup>°</sup> y<br>2y3 <sup>°</sup> y3 <sup>°</sup> y3y4 <sup>°</sup> y4 <sup>°</sup> y4y5 <sup>°</sup> y5 <sup>°</sup><br>y5y6 <sup>°</sup> y6y7y8 <sup>°</sup> y8y9 <sup>°</sup> y9y10y<br>11                                                                               | 1198.53 | 24.413  | 318859  | 2 | 599.77  | 4.79   |
| P68133 ACTS_HUMAN Actin | 8  |                                                | LDLAGRDLTDYLMK                          | 179 | 14 | 10 | 54.29  | b2b3b12y1y2y3y4y11y12y<br>14                                                                                                                                                                                                                                                                                                 | 1623.82 | 77.782  | 226010  | 3 | 541.94  | -13.23 |
| P68133 ACTS_HUMAN Actin | 9  |                                                | IIAPPERK                                | 330 | 8  | 13 | 73.06  | b2b3y1y2y3 <sup>°</sup> y3y4 <sup>°</sup> y4y5 <sup>°</sup> y5<br>y6y7y8                                                                                                                                                                                                                                                     | 923.56  | 25.342  | 126049  | 2 | 462.28  | -10.05 |
| P68133 ACTS_HUMAN Actin | 10 |                                                | IWHHTFYNELR                             | 86  | 11 | 10 | 78.91  | b3b9 <sup>°</sup> b9y3y4y5y7y8 <sup>°</sup> y8 <sup>°</sup> y8                                                                                                                                                                                                                                                               | 1515.73 | 55.131  | 131605  | 3 | 505.91  | -14.98 |
| P68133 ACTS_HUMAN Actin | 11 |                                                | IIAPPER                                 | 330 | 7  | 6  | 51.88  | y3y4y5 <sup>°</sup> y5y6 <sup>°</sup> y6                                                                                                                                                                                                                                                                                     | 795.46  | 32.108  | 73905   | 2 | 398.24  | -10.44 |
| P68133 ACTS_HUMAN Actin | 12 |                                                | SYELPDGQVITIGNER                        | 240 | 16 | 21 | 128.66 | b6b7b8b9 <sup>°</sup> b9b10 <sup>°</sup> b10 <sup>°</sup> b10<br>b11 <sup>°</sup> b11b12b14 <sup>°</sup> b14y3 <sup>°</sup> y3 <sup>°</sup><br>y3y5y9y11 <sup>°</sup> y11 <sup>°</sup> y11                                                                                                                                   | 1790.88 | 70.423  | 46537   | 3 | 597.63  | -8.11  |
| P68133 ACTS_HUMAN Actin | 13 |                                                | DLYANNVMSGGTTMYPGIADR                   | 293 | 21 | 4  | 23.54  | b8y10y14y15                                                                                                                                                                                                                                                                                                                  | 2246.07 | 76.425  | 28320   | 2 | 1123.54 | 21.31  |
| P68133 ACTS_HUMAN Actin | 14 | Carbamidomethyl+C(2)                           | LCYVALDFENEMATAASSSSLEK                 | 217 | 23 | 3  | 12.44  | b8y4y6                                                                                                                                                                                                                                                                                                                       | 2536.18 | 100.116 | 3945    | 2 | 1268.59 | 7.60   |
| P68133 ACTS_HUMAN Actin | 15 | Carbamidomethyl+C(1)                           | CPETLFQPSFIGMESAGIHETTYNS<br>IMK        | 258 | 28 | 7  | 21.48  | b9 <sup>°</sup> b9y6y8y9 <sup>°</sup> y9 <sup>°</sup> y9                                                                                                                                                                                                                                                                     | 3188.54 | 125.679 | 3860    | 3 | 1063.52 | 19.37  |
| P68133 ACTS_HUMAN Actin | 16 | Carbamidomethyl+C(1);<br>Carbamidomethyl+C(29) | CPETLFQPSFIGMESAGIHETTYNS<br>IMKCIDIR   | 258 | 34 | 5  | 25.1   | b8b12b13 <sup>°</sup> b13b18                                                                                                                                                                                                                                                                                                 | 3960.84 | 95.112  | 190150  | 4 | 990.96  | 2.22   |
| P68133 ACTS_HUMAN Actin | 17 |                                                | DLYANNVMSGGTTMYPGIADRM<br>QK            | 293 | 24 | 9  | 62.95  | b3 <sup>°</sup> b3b4b5b6b8y5y9y10                                                                                                                                                                                                                                                                                            | 2633.25 | 100.153 | 17081   | 3 | 878.42  | 14.93  |
| P68133 ACTS_HUMAN Actin | 18 |                                                | YPIEHGITNWDDMEKIWHHTFYN<br>ELR          | 70  | 27 | 5  | 21.49  | b4b5 <sup>°</sup> b5y6 <sup>°</sup> y6                                                                                                                                                                                                                                                                                       | 3457.69 | 125.729 | 2971    | 3 | 1153.24 | 14.33  |
| P68133 ACTS_HUMAN Actin | 19 | Carbamidomethyl+C(4)                           | EKLCYVALDFENEMATAASSSSLE<br>K           | 215 | 25 | 3  | 11.89  | b5b13y10                                                                                                                                                                                                                                                                                                                     | 2793.33 | 79.262  | 2479    | 2 | 1397.17 | 10.49  |

|                                 |    |                      |                        |     |    |    |        |                                                                                                      |         |         |         |   |         |        |
|---------------------------------|----|----------------------|------------------------|-----|----|----|--------|------------------------------------------------------------------------------------------------------|---------|---------|---------|---|---------|--------|
| P68133 ACTS_HUMAN Actin         | 20 | Oxidation+M()        | DLTDYLMK               | 185 | 8  | 3  | 34.82  | b4b6y5                                                                                               | 1014.49 | 69.740  | 15546   | 2 | 507.75  | 5.29   |
| P68133 ACTS_HUMAN Actin         | 21 | Oxidation+M()        | DLYANNVMSGGTTMYPGIADR  | 293 | 21 | 5  | 23.54  | b3y4y6y7°y7                                                                                          | 2262.05 | 108.980 | 1691    | 3 | 754.69  | 12.95  |
| P63267 ACTH_HUMAN Actin         | 1  |                      | AGFAGDDAPR             | 19  | 10 | 14 | 110.94 | b2b3b4y1y2y3y4y5y6y7°y7y8y9y10                                                                       | 976.44  | 29.683  | 2755233 | 2 | 488.73  | -4.69  |
| P63267 ACTH_HUMAN Actin         | 2  |                      | YPIEHGITNWDDEMEK       | 69  | 16 | 35 | 208.62 | b2b3b6b8b9°b9b11°b11°b11b13°b13b14b16°b16y1y2°y2y3y4y5°y5y6y7°y7y8*y8y12y13°y13°y13y14y15*y15y16°y16 | 1960.90 | 65.857  | 2453544 | 3 | 654.31  | -4.30  |
| P63267 ACTH_HUMAN Actin         | 3  |                      | EITALAPSTMK            | 316 | 11 | 23 | 119.37 | b1b2°b2b3°b3b4°b4b6y1y2y3°y3y4°y4y5°y5y6°y6y7y8y9°y9y11                                              | 1161.62 | 49.700  | 1560449 | 2 | 581.31  | 3.15   |
| P63267 ACTH_HUMAN Actin         | 4  |                      | AVFPSIVGRPR            | 29  | 11 | 14 | 120.16 | b2b3b9y1y2y3y4y5y6y7y8°y8y9y10                                                                       | 1198.70 | 55.035  | 962517  | 2 | 599.85  | -4.38  |
| P63267 ACTH_HUMAN Actin         | 5  |                      | DSYVGDEAQSQR           | 51  | 12 | 38 | 191.33 | b1b2°b2b3°b3b4b7°b7b8b9b10y1y2y3°y3y4°y4°y4y5°y5°y5y6°y6°y6y7°y7°y7y8°y8°y8y9°y9°y9y10°y10y11y12°y12 | 1354.62 | 22.176  | 672819  | 2 | 677.81  | -3.87  |
| P63267 ACTH_HUMAN Actin         | 6  |                      | HQGVVMVGMGQK           | 40  | 11 | 27 | 193.89 | b1b2°b2b3b4b5b6°b6b7b8°b8b9b10y1y2°y2y3°y3y4°y4y5y6y7y9y10°y10y11                                    | 1171.57 | 31.981  | 467461  | 2 | 586.29  | 0.52   |
| P63267 ACTH_HUMAN Actin         | 7  |                      | DSYVGDEAQSQR           | 51  | 11 | 28 | 168.4  | b2°b2b3°b3b6b8b9b10y2°y2y3°y3°y3y4°y4°y4y5°y5°y5y6°y6y7y8y9°y9y10y11                                 | 1198.53 | 24.413  | 318859  | 2 | 599.77  | 4.79   |
| P63267 ACTH_HUMAN Actin         | 8  |                      | LDLAGRDLTDYLMK         | 178 | 14 | 10 | 54.29  | b2b3b12y1y2y3y4y11y12y14                                                                             | 1623.82 | 77.782  | 226010  | 3 | 541.94  | -13.23 |
| P63267 ACTH_HUMAN Actin         | 9  |                      | IIAPPERK               | 329 | 8  | 13 | 73.06  | b2b3y1y2y3°y3y4°y4y5°y5y6y7y8                                                                        | 923.56  | 25.342  | 126049  | 2 | 462.28  | -10.05 |
| P63267 ACTH_HUMAN Actin         | 10 | Phosphoryl.STY()     | EITALAPSTMK            | 316 | 11 | 5  | 48.65  | b6b7y6y7y9                                                                                           | 1241.56 | 28.723  | 5615    | 2 | 621.28  | -12.29 |
| P63267 ACTH_HUMAN Actin         | 11 |                      | EITALAPSTMK            | 316 | 11 | 0  | 2.7    |                                                                                                      | 1143.61 | 49.714  | 84958   | 2 | 572.31  | 4.48   |
| P63267 ACTH_HUMAN Actin         | 12 |                      | DSYVGDEAQSQR           | 51  | 12 | 3  | 20.86  | b5b6°b6                                                                                              | 1337.60 | 22.196  | 26853   | 3 | 446.54  | 5.66   |
| P63267 ACTH_HUMAN Actin         | 13 |                      | AGFAGDDAPR             | 19  | 10 | 2  | 8      | b8°b8                                                                                                | 958.43  | 29.629  | 26318   | 2 | 479.72  | -0.64  |
| P37802 TAGL2_HUMAN Transgelin-2 | 1  | Carbamidomethyl+C(6) | DGTVLCELINALYPEGQAPVKK | 57  | 22 | 20 | 120.88 | b2b3°b3b4°b4b11°b11b22y2y3y4y5y8y9y10y11y12y14y18y22                                                 | 2415.25 | 104.783 | 261653  | 3 | 805.75  | -4.35  |
| P37802 TAGL2_HUMAN Transgelin-2 | 2  |                      | YGINTTDFQTVDLWEGK      | 102 | 18 | 24 | 173.73 | b2b3b4b5b13°b13b15b16b18y2y3°y3y4y5°y5y6y8y9°y9y10y12y13y14y18                                       | 2100.03 | 99.871  | 212965  | 2 | 1050.52 | 2.91   |
| P37802 TAGL2_HUMAN Transgelin-2 | 3  |                      | TLMNLGGLAVAR           | 127 | 12 | 12 | 94.33  | b2b3b4°b4y2y4y6y7y8y9y10y12                                                                          | 1215.69 | 72.241  | 196317  | 2 | 608.35  | -0.70  |
| P37802 TAGL2_HUMAN Transgelin-2 | 4  |                      | DDGLFSGDPNWFPPK        | 139 | 15 | 10 | 41.2   | b2b3°b3b4y1y3y7°y7y11°y11                                                                            | 1722.80 | 75.929  | 132157  | 3 | 574.94  | -5.74  |
| P37802 TAGL2_HUMAN Transgelin-2 | 5  |                      | IQASTMAFK              | 79  | 9  | 10 | 59.51  | b6°b6y1y2y3y5y6°y6y7y9                                                                               | 996.52  | 44.980  | 124214  | 2 | 498.76  | -0.25  |
| P37802 TAGL2_HUMAN Transgelin-2 | 6  |                      | DDGLFSGDPNWFPPK        | 139 | 14 | 9  | 42.51  | b2b3b4y2y6y9°y9y10y14                                                                                | 1594.72 | 86.522  | 117945  | 2 | 797.87  | 4.36   |
| P37802 TAGL2_HUMAN Transgelin-2 | 7  |                      | QMEQISQFLQAAER         | 88  | 14 | 20 | 148.55 | b3°b3°b3b4°b4°b4b5°b5b14y3y4y5°y5y6y7y9y10y11y12y14                                                  | 1678.83 | 79.812  | 114177  | 2 | 839.92  | 2.47   |
| P37802 TAGL2_HUMAN Transgelin-2 | 8  |                      | NFSDNQLQEGK            | 160 | 11 | 10 | 68.38  | b2°b2b9y2y5y7y8y9y10y11                                                                              | 1279.59 | 35.167  | 101159  | 2 | 640.30  | 2.29   |



|                                 |    |                                          |                            |      |    |    |        |                                                                         |         |         |        |   |         |        |
|---------------------------------|----|------------------------------------------|----------------------------|------|----|----|--------|-------------------------------------------------------------------------|---------|---------|--------|---|---------|--------|
| P37802 TAGL2_HUMAN Transgelin-2 | 9  | Carbamidomethyl+C(18)                    | QYDADLEQLIQWITTQCRK        | 20   | 20 | 8  | 23.05  | b2*b2b20y2y6y8y9y20                                                     | 2522.27 | 107.415 | 88020  | 3 | 841.43  | -2.13  |
| P37802 TAGL2_HUMAN Transgelin-2 | 10 | Carbamidomethyl+C(18)                    | QYDADLEQLIQWITTQCR         | 20   | 19 | 24 | 153.55 | b2b8b9b10b11b12*b12b19y1y2y3*y3y4*y4y5y6y7*y7y8*y8y9y10*y10y19          | 2394.17 | 114.883 | 68596  | 3 | 798.73  | -1.53  |
| P37802 TAGL2_HUMAN Transgelin-2 | 11 |                                          | GPAYGLSR                   | 4    | 8  | 4  | 34.82  | b3y4y7y8                                                                | 820.43  | 31.945  | 37273  | 2 | 410.72  | -5.65  |
| P37802 TAGL2_HUMAN Transgelin-2 | 12 |                                          | NVIGLQMGNTNR               | 171  | 11 | 7  | 39.88  | b2b3y4y8*y8y10y11                                                       | 1202.63 | 53.814  | 30180  | 2 | 601.82  | -4.16  |
| P37802 TAGL2_HUMAN Transgelin-2 | 13 |                                          | GASQAGMTGYGMPR             | 182  | 14 | 3  | 18.27  | b13y7y9                                                                 | 1383.62 | 43.933  | 19290  | 2 | 692.31  | 4.32   |
| P37802 TAGL2_HUMAN Transgelin-2 | 14 | Carbamidomethyl+C(6)                     | DGTVLCELINALYPEGAPVK       | 57   | 21 | 4  | 23.54  | b7y3y4y8                                                                | 2287.17 | 111.376 | 8064   | 2 | 1144.09 | 3.52   |
| P37802 TAGL2_HUMAN Transgelin-2 | 15 |                                          | DVGRPQPGRENFNWLK           | 40   | 17 | 8  | 51.08  | b6*b6b7*b7b8y7y11y13                                                    | 2041.03 | 71.031  | 58470  | 3 | 681.01  | -3.95  |
| P37802 TAGL2_HUMAN Transgelin-2 | 16 |                                          | NVIGLQMGNTNRGASQAGMTGYGMPR | 171  | 25 | 3  | 22.38  | b3b4b12                                                                 | 2567.23 | 84.979  | 2944   | 3 | 856.42  | 1.14   |
| P37802 TAGL2_HUMAN Transgelin-2 | 17 | Phosphoryl STY(10)                       | GASQAGMTGYGMPR             | 182  | 14 | 12 | 53.71  | b4*b4*b4b5*b5b8*b8b10_H3PO4b10y12*y12y13*y13                            | 1463.59 | 16.247  | 632740 | 3 | 488.53  | 11.59  |
| P37802 TAGL2_HUMAN Transgelin-2 | 18 | Carbamidomethyl+C(18);Phosphoryl STY(15) | QYDADLEQLIQWITTQCRK        | 20   | 20 | 4  | 13.63  | b3b13y7*y7                                                              | 2602.26 | 100.581 | 2128   | 2 | 1301.63 | 13.13  |
| P37802 TAGL2_HUMAN Transgelin-2 | 19 | Oxidation+M(2)                           | QMEQISQFLQAAER             | 88   | 14 | 3  | 23.71  | b9b10y7                                                                 | 1694.83 | 96.437  | 188340 | 2 | 847.92  | 5.47   |
| P37802 TAGL2_HUMAN Transgelin-2 | 20 | Oxidation+M(7)                           | GASQAGMTGYGMPR             | 182  | 14 | 3  | 18.27  | b8b10y6                                                                 | 1399.62 | 104.205 | 3407   | 1 | 1399.62 | 9.68   |
| P37802 TAGL2_HUMAN Transgelin-2 | 21 |                                          | FSGDPNWFPPK                | 143  | 11 | 0  | 4.5    |                                                                         | 1322.67 | 75.933  | 15488  | 2 | 661.84  | 11.81  |
| P37802 TAGL2_HUMAN Transgelin-2 | 22 |                                          | PEGQAPVKK                  | 70   | 9  | 5  | 36.03  | b3b4b5*b5b8                                                             | 953.54  | 104.804 | 5750   | 2 | 477.27  | -5.50  |
| P37802 TAGL2_HUMAN Transgelin-2 | 23 |                                          | NALYPEGAPVKK               | 66   | 13 | 0  | 7.64   |                                                                         | 1414.78 | 104.853 | 3546   | 2 | 707.89  | 5.09   |
| P37802 TAGL2_HUMAN Transgelin-2 | 24 |                                          | GDPNWFPPK                  | 145  | 9  | 0  | 4.5    |                                                                         | 1088.56 | 75.935  | 2846   | 2 | 544.78  | 7.51   |
| P35579 MYH9_HUMAN Myosin-9      | 1  |                                          | LQQLDDLLVLDLHQR            | 1417 | 16 | 23 | 154.12 | b2*b2b3*b3b6y1y2*y2y3*y3y4y5y6y7*y7y8y10y11y12y13y14*y14y16             | 1949.97 | 84.903  | 419395 | 3 | 650.66  | -10.02 |
| P35579 MYH9_HUMAN Myosin-9      | 2  |                                          | IMGIPEEEQMGLLR             | 327  | 14 | 8  | 59.73  | b2b3b4y4y8y10y12y14                                                     | 1615.82 | 77.185  | 262410 | 2 | 808.41  | 1.89   |
| P35579 MYH9_HUMAN Myosin-9      | 3  |                                          | IAEFTTNLTETEEEEK           | 1000 | 14 | 18 | 151.97 | b2b3b9*b9b12b13y4y5y6y7y8y10y11y12*y12*y12y13y14                        | 1653.79 | 56.460  | 246253 | 2 | 827.40  | 5.54   |
| P35579 MYH9_HUMAN Myosin-9      | 4  |                                          | IIGLDQVAGMSETALPGAFK       | 617  | 20 | 15 | 101.73 | b1b2b3b4b5b15y2y3y4y5y6y7y13y16y20                                      | 2018.07 | 89.221  | 245058 | 2 | 1009.54 | 2.84   |
| P35579 MYH9_HUMAN Myosin-9      | 5  |                                          | QLLQANPILEAFGNAK           | 209  | 16 | 28 | 174.36 | b2*b2b3*b3b4*b4b5*b5b6*b6b16y1y2y4y5y6y7*y7y8y10y11y12y13*y13y14*y14y16 | 1726.95 | 90.461  | 238751 | 2 | 863.98  | 0.78   |
| P35579 MYH9_HUMAN Myosin-9      | 6  |                                          | VSHLLGINVDFTR              | 373  | 14 | 13 | 107.5  | b1b3*b3b5b6y3y4y5y6y7y9y10y14                                           | 1571.84 | 74.308  | 221394 | 3 | 524.62  | -11.26 |
| P35579 MYH9_HUMAN Myosin-9      | 7  |                                          | IAQLEEQLDNETK              | 1815 | 13 | 15 | 125.23 | b3b4b6b9b10b11y5y6y9y10*y10y11*y11y13*y13                               | 1530.77 | 50.737  | 209369 | 2 | 765.89  | 3.11   |
| P35579 MYH9_HUMAN Myosin-9      | 8  |                                          | EEVGEEAIVELVENGKK          | 47   | 17 | 14 | 124.4  | b2*b2b8b9y4y5y6y7y8y9y10y14y15y17                                       | 1871.95 | 74.890  | 201925 | 3 | 624.65  | -7.17  |

|                            |    |                       |                       |      |    |    |        |                                                                       |         |        |        |   |         |       |
|----------------------------|----|-----------------------|-----------------------|------|----|----|--------|-----------------------------------------------------------------------|---------|--------|--------|---|---------|-------|
| P35579 MYH9_HUMAN Myosin-9 | 9  |                       | DFSALESQLQDTQELLQEENR | 1301 | 21 | 16 | 72.46  | b2b3°b3b14y2y3°y3y4°y4y5°y5y6y8y11y15y21                              | 2493.19 | 90.886 | 181882 | 2 | 1247.10 | 5.97  |
| P35579 MYH9_HUMAN Myosin-9 | 10 |                       | IAQLEEELEEEQGNTELINDR | 1730 | 21 | 12 | 89.5   | b3b9b11y3°y3y4y5y6y7y10y11y21                                         | 2472.18 | 70.054 | 180930 | 3 | 824.73  | 0.69  |
| P35579 MYH9_HUMAN Myosin-9 | 11 |                       | TQLEEELEDELQATEDAK    | 1538 | 17 | 23 | 178.33 | b2°b2b4b5b9b11°b11b13b14y2y3y4y5y6y8y9°y9y11y12y13°y13y15y17          | 1961.93 | 78.129 | 173219 | 2 | 981.47  | 5.48  |
| P35579 MYH9_HUMAN Myosin-9 | 12 |                       | LDPHLVLDQLR           | 682  | 11 | 8  | 79.18  | y3y4*y4y5y6y7y9y11                                                    | 1318.74 | 70.486 | 163228 | 2 | 659.88  | -3.15 |
| P35579 MYH9_HUMAN Myosin-9 | 13 |                       | DELADEIANSSESGK       | 1703 | 13 | 13 | 106.85 | b2b3b4y2y3y4°y4y5y8y9y10y11y13                                        | 1348.63 | 48.717 | 161195 | 2 | 674.82  | 3.80  |
| P35579 MYH9_HUMAN Myosin-9 | 14 |                       | ELESQISELQEDLESER     | 1107 | 17 | 25 | 195.85 | b2b3°b3b5b6°b6°b6b7b12°b12b13y1y3y4y5y6y7y8*y8y9y10y11y12y14y17       | 2033.96 | 78.721 | 155503 | 2 | 1017.49 | 6.72  |
| P35579 MYH9_HUMAN Myosin-9 | 15 |                       | VIQYLAYVASSHK         | 186  | 13 | 9  | 60.25  | b1b2b12y5y6y7°y7y8y10                                                 | 1478.79 | 60.896 | 152409 | 3 | 493.60  | -9.08 |
| P35579 MYH9_HUMAN Myosin-9 | 16 |                       | LTEMETLQSQLMAEK       | 867  | 15 | 13 | 88.21  | b3b4b7b13b14y1y3y4y11°y11y12°y12y15                                   | 1751.86 | 72.653 | 152040 | 2 | 876.43  | 1.88  |
| P35579 MYH9_HUMAN Myosin-9 | 17 |                       | VEAQLQELQVK           | 1249 | 11 | 15 | 112.64 | b2b3b4b8b9y1y2y3°y3y5y7y8y9*y9y11                                     | 1284.72 | 52.451 | 147521 | 2 | 642.86  | 0.86  |
| P35579 MYH9_HUMAN Myosin-9 | 18 |                       | LQVELDNVTGLLSQSDSK    | 1277 | 18 | 16 | 101.72 | b2°b2b3b4y2y4y6y7y12y13y14y15y16*y16y18*y18                           | 1946.02 | 80.314 | 139729 | 2 | 973.51  | 4.96  |
| P35579 MYH9_HUMAN Myosin-9 | 19 |                       | ANLQIDQINTDLNLER      | 1754 | 16 | 16 | 112.9  | b2°b2b3b12°b12b13b14y4y5y6y8y11y12°y12y13y16                          | 1869.97 | 71.560 | 135785 | 2 | 935.49  | 3.98  |
| P35579 MYH9_HUMAN Myosin-9 | 20 |                       | ALEQQVEEMK            | 1528 | 10 | 22 | 109.18 | b2b3b4°b4b8°b8°b8y2y3°y3y4°y4y5y6°y6°y6y7°y7*y7y8*y8y10               | 1204.59 | 44.891 | 126397 | 2 | 602.80  | 4.05  |
| P35579 MYH9_HUMAN Myosin-9 | 21 |                       | LEVNQAMK              | 1557 | 9  | 11 | 78.28  | b2y1y3y4*y4y5y6*y6y7y8y9                                              | 1045.57 | 57.290 | 122293 | 2 | 523.29  | -3.62 |
| P35579 MYH9_HUMAN Myosin-9 | 22 |                       | NTNPNFVR              | 662  | 8  | 12 | 31.81  | b1°b1b2°b2b5°b5y2y5*y5y6*y6y8                                         | 961.48  | 31.100 | 115220 | 2 | 481.25  | -0.06 |
| P35579 MYH9_HUMAN Myosin-9 | 23 |                       | MQQNIQELEELEEEESAR    | 940  | 19 | 27 | 202.68 | b2°b2b3b4b5°b5b6b7b9°b9b11°b11y2y3y4°y4y5y7y8y9y11y12y13y14*y14y17y19 | 2333.08 | 74.380 | 113878 | 2 | 1167.05 | 11.82 |
| P35579 MYH9_HUMAN Myosin-9 | 24 |                       | TEMEDLMSSKDDVVGK      | 1503 | 15 | 9  | 42     | b2°b2b10y3y8y9°y9y10y15                                               | 1684.73 | 50.407 | 106638 | 3 | 562.25  | -6.67 |
| P35579 MYH9_HUMAN Myosin-9 | 25 |                       | ASITALEAK             | 1806 | 9  | 5  | 37.03  | y2y5y6y8y9                                                            | 903.51  | 41.302 | 105252 | 2 | 452.26  | -5.88 |
| P35579 MYH9_HUMAN Myosin-9 | 26 | Carbamidomethyl+C(13) | LEEEQIILEDQNCK        | 975  | 14 | 20 | 187.46 | b3°b3b4b5b6b7b8b12y3*y3y5y7°y7y8y9y10*y10y12y13y14                    | 1760.84 | 54.228 | 99558  | 2 | 880.92  | 1.87  |
| P35579 MYH9_HUMAN Myosin-9 | 27 | Carbamidomethyl+C(9)  | VEDMAELTCLNEASVLHNLK  | 82   | 20 | 8  | 35.44  | b3b5y2y4y5y10y13y20                                                   | 2286.10 | 79.023 | 99109  | 3 | 762.70  | -5.23 |
| P35579 MYH9_HUMAN Myosin-9 | 28 |                       | ALELDSNLYR            | 745  | 10 | 14 | 84.48  | b2b8y1y2y3y4y5*y5y6y8°y8*y8y9y10                                      | 1193.62 | 59.158 | 90703  | 2 | 597.31  | 1.53  |
| P35579 MYH9_HUMAN Myosin-9 | 29 |                       | YEILTPNSIPK           | 720  | 11 | 5  | 23.16  | b2b9y6y9y11                                                           | 1274.70 | 61.750 | 89534  | 2 | 637.86  | 2.97  |
| P35579 MYH9_HUMAN Myosin-9 | 30 |                       | ELEDATETADAMNR        | 1898 | 14 | 9  | 72.94  | b11y2y3y6y9y10y11y12y14                                               | 1565.68 | 42.298 | 87787  | 2 | 783.35  | 5.85  |
| P35579 MYH9_HUMAN Myosin-9 | 31 | Carbamidomethyl+C(4)  | ADFCIIHYAGK           | 565  | 11 | 10 | 78.91  | b3b7y1y2y3y4y5y7y8y11                                                 | 1294.62 | 58.016 | 86162  | 2 | 647.81  | -2.45 |
| P35579 MYH9_HUMAN Myosin-9 | 32 |                       | KEEELQAALAR           | 1080 | 11 | 12 | 81.92  | b2°b2b3°b3b8y4y5y7y9y10*y10y11                                        | 1257.68 | 41.624 | 81195  | 2 | 629.34  | 0.29  |
| P35579 MYH9_HUMAN Myosin-9 | 33 |                       | VVFQEFR               | 711  | 7  | 8  | 51.88  | b1y2y3y4°y4y5y6y7                                                     | 924.49  | 54.933 | 78206  | 2 | 462.75  | -4.75 |

|                            |    |                      |                            |      |    |    |        |                                                                                          |         |         |       |   |         |        |
|----------------------------|----|----------------------|----------------------------|------|----|----|--------|------------------------------------------------------------------------------------------|---------|---------|-------|---|---------|--------|
| P35579 MYH9_HUMAN Myosin-9 | 34 | Carbamidomethyl+C(1) | CNGVLEGR                   | 693  | 9  | 10 | 59.51  | b1b2*b2b4y3y4y5y7y9*y9                                                                   | 1017.51 | 47.905  | 75078 | 2 | 509.26  | -1.50  |
| P35579 MYH9_HUMAN Myosin-9 | 35 |                      | QIATLHAQVADMK              | 1357 | 13 | 15 | 76.01  | b8°b8*b8y1y3y6*y6y7*y7*y7y8y10y11y13*y13                                                 | 1425.75 | 45.879  | 73816 | 3 | 475.92  | -1.54  |
| P35579 MYH9_HUMAN Myosin-9 | 36 |                      | AGVLAHLEER                 | 764  | 11 | 7  | 50.87  | b3y2y4y5y6y8y11                                                                          | 1223.64 | 48.935  | 70232 | 2 | 612.32  | -0.70  |
| P35579 MYH9_HUMAN Myosin-9 | 37 |                      | NFINNPLAQADWAAK            | 14   | 15 | 8  | 49.18  | b2b3b13y8y10y11y12y15                                                                    | 1672.85 | 77.578  | 67550 | 2 | 836.93  | 1.68   |
| P35579 MYH9_HUMAN Myosin-9 | 38 |                      | QLEEAEEEEQR                | 1877 | 11 | 14 | 104.67 | b11y3y4y5°y5y6y7°y7y8°y8y9°y9y10y11                                                      | 1331.61 | 28.371  | 61568 | 2 | 666.31  | 0.18   |
| P35579 MYH9_HUMAN Myosin-9 | 39 |                      | SMEAEMIQLQEELAAAER         | 1676 | 18 | 23 | 192.5  | b2b3b7b12b13°b13b15y1y2y3y4y5y6y7y8°y8y9°y9y10y11y12y13y14                               | 2048.95 | 93.219  | 55962 | 3 | 683.65  | -7.15  |
| P35579 MYH9_HUMAN Myosin-9 | 40 |                      | FLSNGHVITPGQQDKDMFQETMEAMR | 301  | 26 | 17 | 86.4   | b2b6°b6b13b21*b21y2y3y4°y4y5y6y7y9y10y12y26                                              | 3010.39 | 76.180  | 54513 | 4 | 753.35  | 0.81   |
| P35579 MYH9_HUMAN Myosin-9 | 41 |                      | THEAQIQEMR                 | 1181 | 10 | 28 | 155.2  | b1b2°b2b3°b3b4b5°b5b6°b6°b6b7°b7y1y2y3°y3y4*y4y5°y5y6*y6y7*y7y8y9y10                     | 1242.59 | 27.758  | 51585 | 2 | 621.80  | -0.29  |
| P35579 MYH9_HUMAN Myosin-9 | 42 |                      | FDQLLAEEK                  | 1445 | 9  | 8  | 43.24  | b2b6°b6b7y2y5y6y9                                                                        | 1092.56 | 49.312  | 48659 | 2 | 546.78  | 1.12   |
| P35579 MYH9_HUMAN Myosin-9 | 43 | Carbamidomethyl+C(7) | MEDSVGCLETAEEVK            | 1372 | 15 | 5  | 28     | b4y8y10y13y15                                                                            | 1696.75 | 52.933  | 46439 | 2 | 848.88  | 6.40   |
| P35579 MYH9_HUMAN Myosin-9 | 44 |                      | TELEDTLDSTAAQQLR           | 1145 | 17 | 5  | 22.43  | b13y6*y6y7y17                                                                            | 1919.93 | 60.669  | 44923 | 2 | 960.47  | 6.42   |
| P35579 MYH9_HUMAN Myosin-9 | 45 | Carbamidomethyl+C(7) | MEDSVGCLETAEEVKR           | 1372 | 16 | 12 | 68.13  | b2b5b11b12y1y2y4y7y8y10y11y16                                                            | 1852.84 | 47.752  | 44863 | 3 | 618.28  | -3.23  |
| P35579 MYH9_HUMAN Myosin-9 | 46 |                      | NTDQASMPDNTAAQK            | 358  | 15 | 32 | 165.46 | b1*b1b2*b2b3b7°b7°b7b11y1y3*y3y4*y4y5*y5y6*y6y7y8*y8y9°y9y10°y10*y10y11°y11y12*y12y13y15 | 1591.70 | 25.342  | 40181 | 2 | 796.36  | 0.69   |
| P35579 MYH9_HUMAN Myosin-9 | 47 |                      | VKPLLQVSR                  | 833  | 9  | 5  | 37.03  | y2y4y5y7y9                                                                               | 1039.66 | 42.600  | 38767 | 2 | 520.33  | -0.23  |
| P35579 MYH9_HUMAN Myosin-9 | 48 |                      | VISGVLQLGNIVFK             | 341  | 14 | 3  | 26.85  | y3y6y12                                                                                  | 1486.90 | 94.031  | 36771 | 2 | 743.95  | -0.25  |
| P35579 MYH9_HUMAN Myosin-9 | 49 |                      | LEGDSTLDSQIAELQAIAELK      | 1052 | 23 | 14 | 64.44  | b2b4b7b13b14b15°b15b19y1y2y4y5y8y23                                                      | 2487.26 | 100.759 | 36116 | 2 | 1244.13 | 4.22   |
| P35579 MYH9_HUMAN Myosin-9 | 50 |                      | NLPIYSEEIVEMYK             | 125  | 14 | 6  | 37.87  | b4b7y4y10y12y14                                                                          | 1727.87 | 81.250  | 32607 | 2 | 864.44  | 6.29   |
| P35579 MYH9_HUMAN Myosin-9 | 51 |                      | LQKDLEGLSQR                | 1389 | 11 | 4  | 34.92  | y4y6y9y11                                                                                | 1286.73 | 29.391  | 21439 | 3 | 429.58  | 14.61  |
| P35579 MYH9_HUMAN Myosin-9 | 52 |                      | FLSNGHVITPGQQDK            | 301  | 15 | 8  | 50.45  | y3°y3y5°y5y6y7y13y15                                                                     | 1640.83 | 48.576  | 21278 | 3 | 547.62  | -3.94  |
| P35579 MYH9_HUMAN Myosin-9 | 53 |                      | HSQAVEELAEQLEQTK           | 1193 | 16 | 8  | 36.01  | b1b6b7b9°b9b13y2y10                                                                      | 1839.90 | 65.629  | 16017 | 3 | 613.97  | -2.92  |
| P35579 MYH9_HUMAN Myosin-9 | 54 |                      | EMEALEDER                  | 1592 | 10 | 6  | 50.22  | b2y5y6y7y8y10                                                                            | 1250.54 | 39.550  | 9181  | 1 | 1250.54 | 12.40  |
| P35579 MYH9_HUMAN Myosin-9 | 55 |                      | TLLEEAK                    | 1174 | 7  | 11 | 48.87  | b2°b2b3°b3b7°b7y2y3y4°y4y5                                                               | 819.41  | 25.375  | 5449  | 2 | 410.21  | -1.64  |
| P35579 MYH9_HUMAN Myosin-9 | 56 |                      | HEAMITDLEER                | 1024 | 11 | 5  | 36.69  | b6b9y6y7y11                                                                              | 1343.63 | 61.987  | 2586  | 2 | 672.32  | 3.72   |
| P35579 MYH9_HUMAN Myosin-9 | 57 |                      | LQQLFNHTMFILEQEYYQR        | 475  | 19 | 4  | 14.15  | b2b8b11y5                                                                                | 2467.24 | 102.660 | 2427  | 3 | 823.08  | 11.97  |
| P35579 MYH9_HUMAN Myosin-9 | 58 | Carbamidomethyl+C(4) | QSACNLEK                   | 1433 | 8  | 7  | 31.81  | b6y2y4*y4y5y8*y8                                                                         | 949.45  | 25.276  | 2184  | 2 | 475.23  | 9.19   |
| P35579 MYH9_HUMAN Myosin-9 | 59 | Carbamidomethyl+C(8) | LQAQMKDCMR                 | 1642 | 10 | 4  | 39.43  | b5b8y5y6                                                                                 | 1280.59 | 37.190  | 2107  | 2 | 640.80  | -1.62  |
| P35579 MYH9_HUMAN Myosin-9 | 60 |                      | IAQLEEQLDNETKER            | 1815 | 15 | 3  | 17.17  | b9y7y9                                                                                   | 1815.90 | 83.581  | 2026  | 2 | 908.45  | -3.43  |
| P35579 MYH9_HUMAN Myosin-9 | 61 |                      | NRDEAIK                    | 1631 | 7  | 7  | 36.13  | b1*b1b3°b3b7y5y6                                                                         | 845.44  | 21.567  | 1534  | 1 | 845.44  | -12.49 |
| P35579 MYH9_HUMAN Myosin-9 | 62 |                      | SGFEPASLK                  | 38   | 9  | 3  | 37.03  | y4y5y8                                                                                   | 935.48  | 45.396  | 51479 | 2 | 468.24  | -1.57  |
| P35579 MYH9_HUMAN Myosin-9 | 63 |                      | TFHIFYLLSGAGEHLK           | 272  | 17 | 6  | 24.8   | b4°b4b9°b9b12y11                                                                         | 1995.99 | 65.086  | 32352 | 3 | 666.00  | -21.28 |
| P35579 MYH9_HUMAN Myosin-9 | 64 |                      | LMATLR                     | 656  | 6  | 2  | 25.94  | y4y5                                                                                     | 704.40  | 39.216  | 22446 | 2 | 352.71  | -11.61 |
| P35579 MYH9_HUMAN Myosin-9 | 65 |                      | LEAR                       | 1726 | 4  | 2  | 25.04  | b3y3                                                                                     | 488.29  | 63.763  | 20691 | 1 | 488.29  | 11.44  |
| P35579 MYH9_HUMAN Myosin-9 | 66 |                      | DYVQK                      | 398  | 5  | 1  | 12.75  | b3                                                                                       | 652.33  | 31.945  | 14495 | 1 | 652.33  | -6.74  |
| P35579 MYH9_HUMAN Myosin-9 | 67 |                      | ALSLAR                     | 1477 | 6  | 1  | 13.2   | y4                                                                                       | 630.40  | 33.750  | 8904  | 1 | 630.40  | 2.81   |

|                            |     |                       |                             |      |    |    |        |                                                                                                          |         |         |        |   |         |        |
|----------------------------|-----|-----------------------|-----------------------------|------|----|----|--------|----------------------------------------------------------------------------------------------------------|---------|---------|--------|---|---------|--------|
| P35579 MYH9_HUMAN Myosin-9 | 68  |                       | DMFQETMEAMR                 | 316  | 11 | 7  | 30.14  | b3°b3b4°b4*b4b8*b8                                                                                       | 1388.56 | 16.236  | 7662   | 3 | 463.52  | -4.22  |
| P35579 MYH9_HUMAN Myosin-9 | 69  |                       | AQFER                       | 1566 | 5  | 1  | 12.75  | b3                                                                                                       | 650.32  | 38.385  | 6948   | 1 | 650.32  | -8.35  |
| P35579 MYH9_HUMAN Myosin-9 | 70  |                       | AEAEAR                      | 1466 | 6  | 4  | 25.94  | y4°y4y5°y5                                                                                               | 646.31  | 53.166  | 6633   | 1 | 646.31  | -4.82  |
| P35579 MYH9_HUMAN Myosin-9 | 71  |                       | ENEK                        | 1669 | 4  | 3  | 12.3   | b3°b3*b3                                                                                                 | 519.23  | 21.597  | 5664   | 1 | 519.23  | -12.11 |
| P35579 MYH9_HUMAN Myosin-9 | 72  |                       | NAEQYK                      | 1856 | 6  | 1  | 13.2   | y3                                                                                                       | 752.36  | 42.622  | 4054   | 1 | 752.36  | 9.49   |
| P35579 MYH9_HUMAN Myosin-9 | 73  |                       | LEMDLK                      | 1614 | 6  | 1  | 13.2   | y3                                                                                                       | 748.38  | 59.609  | 3983   | 1 | 748.38  | -9.13  |
| P35579 MYH9_HUMAN Myosin-9 | 74  |                       | VLQR                        | 810  | 4  | 1  | 12.3   | b3                                                                                                       | 515.33  | 96.438  | 3495   | 1 | 515.33  | 2.84   |
| P35579 MYH9_HUMAN Myosin-9 | 75  |                       | DLEAHIDSANK                 | 1620 | 11 | 3  | 23.16  | b3b5y10                                                                                                  | 1212.57 | 38.000  | 3293   | 2 | 606.79  | -13.39 |
| P35579 MYH9_HUMAN Myosin-9 | 76  |                       | TELADK                      | 1268 | 6  | 1  | 13.2   | b5                                                                                                       | 676.35  | 27.783  | 3144   | 1 | 676.35  | -7.40  |
| P35579 MYH9_HUMAN Myosin-9 | 77  |                       | HEMPPHIYAITDTAYR            | 143  | 16 | 10 | 71.44  | b6b8b14°b14y4y5°y5y6y7y10                                                                                | 1914.90 | 87.624  | 3074   | 4 | 479.48  | -10.07 |
| P35579 MYH9_HUMAN Myosin-9 | 78  | Carbamidomethyl+C(7)  | QELEEICHLEAR                | 910  | 13 | 3  | 24.35  | b6y3y4                                                                                                   | 1641.76 | 34.582  | 2213   | 2 | 821.38  | 4.24   |
| P35579 MYH9_HUMAN Myosin-9 | 79  |                       | NWQWWR                      | 823  | 6  | 1  | 13.2   | y4                                                                                                       | 975.47  | 67.558  | 2140   | 1 | 975.47  | 13.89  |
| P35579 MYH9_HUMAN Myosin-9 | 80  |                       | SFVEK                       | 540  | 5  | 1  | 12.75  | b3                                                                                                       | 609.33  | 25.301  | 1712   | 1 | 609.33  | 7.41   |
| P35579 MYH9_HUMAN Myosin-9 | 81  |                       | HSQAVEELAEQLEQTKR           | 1193 | 17 | 4  | 15.44  | b16y4°y4y9                                                                                               | 1996.01 | 60.432  | 208688 | 3 | 666.01  | 2.08   |
| P35579 MYH9_HUMAN Myosin-9 | 82  |                       | EQLEEEEAAXHNEK              | 1342 | 15 | 10 | 63.19  | y3y8y9°y9°y9y10°y10*y10y12y13                                                                            | 1854.86 | 34.009  | 207135 | 3 | 618.96  | -5.07  |
| P35579 MYH9_HUMAN Myosin-9 | 83  |                       | DLGEELEALKTELEDTLDSTAAQQELR | 1135 | 27 | 35 | 240.12 | b3b4b5b8b11b12°b12b13b15°b15b16°b16b21°b21b24b25b26y5*y5y6*y6y7y8y9°y9*y9y10y11°y11*y11y12°y12y13°y13y15 | 3017.48 | 117.489 | 169496 | 3 | 1006.50 | -0.89  |
| P35579 MYH9_HUMAN Myosin-9 | 84  |                       | NMDPLNDNIATLLHQSSDKFVSELWK  | 587  | 26 | 4  | 14.85  | b5b11y2y2y3                                                                                              | 3015.46 | 103.671 | 132044 | 4 | 754.62  | -8.42  |
| P35579 MYH9_HUMAN Myosin-9 | 85  |                       | KFDQLLAEK                   | 1444 | 10 | 5  | 50.42  | b5b8y4y5y8                                                                                               | 1220.65 | 47.964  | 109856 | 2 | 610.83  | 1.20   |
| P35579 MYH9_HUMAN Myosin-9 | 86  |                       | KLEGDSTDLSDQIAELQAQIAELK    | 1051 | 24 | 16 | 132.71 | b7b8°b8b9b10b12b13*b13b15y3y4y5y6y7y8y11                                                                 | 2615.33 | 96.204  | 109253 | 3 | 872.45  | -3.27  |
| P35579 MYH9_HUMAN Myosin-9 | 87  |                       | VDYKADEWLMK                 | 576  | 11 | 3  | 26.17  | b9b10y8                                                                                                  | 1397.66 | 61.357  | 94529  | 3 | 466.56  | -9.52  |
| P35579 MYH9_HUMAN Myosin-9 | 88  |                       | SHAQKNENAR                  | 1770 | 10 | 3  | 27.48  | b6y6y7                                                                                                   | 1154.57 | 64.902  | 79820  | 2 | 577.79  | 6.66   |
| P35579 MYH9_HUMAN Myosin-9 | 89  |                       | KANLQIDQINTDLNLER           | 1753 | 17 | 9  | 55.25  | b3*b3b6b12y4*y4y5y6y8                                                                                    | 1998.04 | 65.032  | 72042  | 3 | 666.68  | -12.04 |
| P35579 MYH9_HUMAN Myosin-9 | 90  |                       | RGDLPFVVP                   | 1922 | 10 | 7  | 72.71  | b3b4b6°b6b7y5y6                                                                                          | 1155.66 | 60.017  | 62401  | 2 | 578.33  | -6.44  |
| P35579 MYH9_HUMAN Myosin-9 | 91  |                       | ELESQISELQEDLESERASR        | 1107 | 20 | 4  | 13.63  | b3°b3y7y11                                                                                               | 2348.13 | 80.972  | 59395  | 3 | 783.38  | 5.20   |
| P35579 MYH9_HUMAN Myosin-9 | 92  |                       | AGKLDPLHLVDQLR              | 679  | 14 | 7  | 67.04  | b3b4b5y3y6y7y9                                                                                           | 1574.89 | 65.576  | 58054  | 3 | 525.63  | -9.38  |
| P35579 MYH9_HUMAN Myosin-9 | 93  |                       | VKLQEMEGTVK                 | 1791 | 11 | 5  | 39.88  | b8°b8y4y5y6                                                                                              | 1261.67 | 40.507  | 57444  | 3 | 421.23  | -12.96 |
| P35579 MYH9_HUMAN Myosin-9 | 94  |                       | YLYVDKNFINPLAQADWAAK        | 8    | 21 | 3  | 22.83  | y4y5y12                                                                                                  | 2454.25 | 82.202  | 51725  | 3 | 818.75  | 0.99   |
| P35579 MYH9_HUMAN Myosin-9 | 95  | Carbamidomethyl+C(6)  | DKADFCIIHYAGK               | 563  | 13 | 7  | 63.28  | b3b7b8b11y4y5y9                                                                                          | 1537.73 | 53.905  | 48617  | 3 | 513.25  | -10.72 |
| P35579 MYH9_HUMAN Myosin-9 | 96  | Carbamidomethyl+C(14) | KLEEEQIILEDQNCK             | 974  | 15 | 5  | 49.65  | b7b8y6y7y8                                                                                               | 1888.91 | 50.200  | 40590  | 3 | 630.31  | -10.79 |
| P35579 MYH9_HUMAN Myosin-9 | 97  |                       | DLEAHIDSANKNR               | 1620 | 13 | 6  | 28.14  | b7°b7b9y3y8*y8                                                                                           | 1482.72 | 30.356  | 32730  | 3 | 494.91  | -3.87  |
| P35579 MYH9_HUMAN Myosin-9 | 98  |                       | DLEGLSQRHEEK                | 1392 | 12 | 3  | 25.15  | b7b8y11                                                                                                  | 1440.72 | 49.226  | 26509  | 2 | 720.86  | 8.05   |
| P35579 MYH9_HUMAN Myosin-9 | 99  |                       | KVEAQLQELQVK                | 1248 | 12 | 3  | 31.39  | y3y5y10                                                                                                  | 1412.82 | 47.555  | 26114  | 2 | 706.91  | 6.13   |
| P35579 MYH9_HUMAN Myosin-9 | 100 |                       | IAQLEEEEEEQGNTELINDRLK      | 1730 | 23 | 8  | 49.42  | b7b8b9°b9b11b12°b12y13                                                                                   | 2713.34 | 106.585 | 26097  | 4 | 679.09  | -3.60  |
| P35579 MYH9_HUMAN Myosin-9 | 101 |                       | RHEMPPHIYAITDTAYR           | 142  | 17 | 14 | 87.07  | b6°b6b7°b7b8°b8b9°b9b11y5y6°y6y11y12                                                                     | 2071.04 | 107.238 | 22478  | 3 | 691.02  | 8.37   |
| P35579 MYH9_HUMAN Myosin-9 | 102 |                       | ELEDATETADAMNREVSSLK        | 1898 | 20 | 3  | 21.76  | b3b4y7                                                                                                   | 2209.03 | 67.354  | 22296  | 4 | 553.01  | -0.22  |
| P35579 MYH9_HUMAN Myosin-9 | 103 |                       | QLAAENRLTEMETLQSQLMAEK      | 860  | 22 | 6  | 42.08  | b3b4y5y7y15y20                                                                                           | 2534.24 | 107.348 | 17570  | 3 | 845.42  | -7.03  |
| P35579 MYH9_HUMAN Myosin-9 | 104 |                       | TDLLLEPYNKYR                | 289  | 12 | 5  | 48.13  | b4b9y4y5y6                                                                                               | 1524.79 | 60.010  | 13901  | 3 | 508.93  | -12.25 |
| P35579 MYH9_HUMAN Myosin-9 | 105 |                       | IRELESQISELQEDLESER         | 1105 | 19 | 5  | 14.15  | b7°b7y7y10*y10                                                                                           | 2303.12 | 42.631  | 12299  | 4 | 576.54  | -5.09  |
| P35579 MYH9_HUMAN Myosin-9 | 106 |                       | KTLEEEAK                    | 1173 | 8  | 4  | 47.56  | b6y3y4y6                                                                                                 | 947.50  | 28.797  | 12010  | 2 | 474.25  | -8.25  |
| P35579 MYH9_HUMAN Myosin-9 | 107 |                       | HEEKVAAYDK                  | 1400 | 10 | 3  | 32.71  | b5b8b9                                                                                                   | 1189.58 | 21.588  | 11359  | 3 | 397.20  | -4.62  |
| P35579 MYH9_HUMAN Myosin-9 | 108 | Carbamidomethyl+C(7)  | EDQSILCTGESGAGKTENTK        | 165  | 20 | 3  | 23.05  | y5y12y13                                                                                                 | 2124.97 | 37.954  | 10472  | 3 | 709.00  | 0.23   |

|                            |     |                                         |                            |      |    |   |       |                                  |         |         |        |   |         |        |
|----------------------------|-----|-----------------------------------------|----------------------------|------|----|---|-------|----------------------------------|---------|---------|--------|---|---------|--------|
| P35579 MYH9_HUMAN Myosin-9 | 109 |                                         | NLPIYSEEIVEMYK GK          | 125  | 16 | 5 | 22.87 | b9b11*b11y6y14                   | 1912.94 | 76.044  | 9100   | 3 | 638.32  | -14.49 |
| P35579 MYH9_HUMAN Myosin-9 | 110 |                                         | ATDKSFVEK                  | 536  | 9  | 4 | 37.03 | b3b5*b5b6                        | 1024.52 | 19.662  | 8535   | 2 | 512.76  | -8.22  |
| P35579 MYH9_HUMAN Myosin-9 | 111 |                                         | YEILTPNSIPKGFMDGK          | 720  | 17 | 4 | 15.44 | b8b12*b12y7                      | 1909.99 | 60.319  | 8114   | 3 | 637.33  | 7.54   |
| P35579 MYH9_HUMAN Myosin-9 | 112 |                                         | AQQAADKLYLVDK              | 1    | 13 | 4 | 32.91 | b8b9y4y10                        | 1512.79 | 36.323  | 7633   | 2 | 756.90  | 13.88  |
| P35579 MYH9_HUMAN Myosin-9 | 113 |                                         | KMQQNIQELEEESAR            | 939  | 20 | 7 | 39.36 | b6b7b10y4*y4y5y17                | 2461.13 | 114.845 | 7373   | 3 | 821.05  | -6.75  |
| P35579 MYH9_HUMAN Myosin-9 | 114 |                                         | THEAQIQEMRQK               | 1181 | 12 | 6 | 32.67 | b8*b8b9b11*b11y5                 | 1498.76 | 55.211  | 5956   | 2 | 749.88  | 9.45   |
| P35579 MYH9_HUMAN Myosin-9 | 115 |                                         | QLEEAEEEEAQRANASR          | 1877 | 16 | 6 | 23.94 | b6*b6b9*b9*b9b11                 | 1830.83 | 46.536  | 5703   | 3 | 610.95  | -13.00 |
| P35579 MYH9_HUMAN Myosin-9 | 116 |                                         | SGFEPASLKEEVGEEAIVLVENGK   | 38   | 25 | 4 | 21.43 | b5y4*y4y5                        | 2660.31 | 88.123  | 5585   | 3 | 887.44  | -9.27  |
| P35579 MYH9_HUMAN Myosin-9 | 117 |                                         | ATYERMFR                   | 419  | 8  | 4 | 47.56 | b5b6b7y4                         | 1073.53 | 28.728  | 4760   | 2 | 537.27  | 11.60  |
| P35579 MYH9_HUMAN Myosin-9 | 118 |                                         | EEELQAALARVEEEAAQK         | 1081 | 18 | 4 | 33.61 | b6b13b15b17                      | 2014.02 | 70.971  | 4592   | 2 | 1007.51 | 6.49   |
| P35579 MYH9_HUMAN Myosin-9 | 119 | Carbamidomethyl+C(8)                    | KQELEEICHDLEAR             | 909  | 14 | 8 | 57.97 | b3*b3b4b6b8*b8b11y8              | 1769.83 | 46.524  | 4166   | 2 | 885.42  | -13.24 |
| P35579 MYH9_HUMAN Myosin-9 | 120 |                                         | LEMCLKDLEAHIDSANK          | 1614 | 17 | 5 | 26.05 | b9b10b13*b13y11                  | 1941.95 | 102.806 | 4084   | 3 | 647.99  | -5.15  |
| P35579 MYH9_HUMAN Myosin-9 | 121 |                                         | MAQQAADKLYLVDK             | 0    | 14 | 4 | 26.05 | b5b12b13*b13                     | 1643.80 | 136.536 | 3895   | 1 | 1643.80 | -8.69  |
| P35579 MYH9_HUMAN Myosin-9 | 122 |                                         | ADEWLMKNMDPLNDNIATLLHQSSDK | 580  | 26 | 6 | 20.52 | b5b12b18y5y13*y13                | 2999.45 | 116.585 | 3724   | 3 | 1000.49 | 10.09  |
| P35579 MYH9_HUMAN Myosin-9 | 123 |                                         | DLQGRDEQSEEK               | 1571 | 12 | 3 | 21.17 | b10y6y11                         | 1433.65 | 92.130  | 3655   | 2 | 717.33  | -1.87  |
| P35579 MYH9_HUMAN Myosin-9 | 124 |                                         | LLEDRIAFTTNTTEEEK          | 995  | 19 | 4 | 14.15 | b4b6y9*y9                        | 2280.14 | 113.487 | 3336   | 2 | 1140.57 | 7.71   |
| P35579 MYH9_HUMAN Myosin-9 | 125 |                                         | QFRTEMEDLMSSK              | 1500 | 13 | 3 | 24.35 | b12y5y6                          | 1601.73 | 96.424  | 2920   | 3 | 534.58  | -2.29  |
| P35579 MYH9_HUMAN Myosin-9 | 126 |                                         | AEAAREK                    | 1466 | 8  | 6 | 47.56 | b5*b5b6b7y7*y7                   | 903.44  | 29.504  | 2615   | 2 | 452.22  | -11.82 |
| P35579 MYH9_HUMAN Myosin-9 | 127 |                                         | LQRELEDATETADAMNR          | 1895 | 17 | 3 | 24.09 | b7b11b12                         | 1962.94 | 99.445  | 2390   | 2 | 981.97  | 9.89   |
| P35579 MYH9_HUMAN Myosin-9 | 128 |                                         | DRAEAEAR                   | 1464 | 8  | 6 | 52.33 | b3b4*b4b5b6*b6                   | 917.43  | 86.176  | 2273   | 1 | 917.43  | -13.57 |
| P35579 MYH9_HUMAN Myosin-9 | 129 |                                         | MQQNIQELEEELVEEESARQK      | 940  | 21 | 3 | 13.18 | b12y6y10                         | 2589.20 | 55.947  | 2113   | 3 | 863.74  | -3.02  |
| P35579 MYH9_HUMAN Myosin-9 | 130 |                                         | RQLEEAEEEEAQR              | 1876 | 12 | 5 | 46.35 | b4b5*b5b8b9                      | 1487.73 | 25.386  | 2062   | 2 | 744.37  | 13.29  |
| P35579 MYH9_HUMAN Myosin-9 | 131 |                                         | IAEFTTNTTEEEKSK            | 1000 | 16 | 4 | 26.27 | b9b11b13y9                       | 1868.90 | 60.918  | 2046   | 3 | 623.64  | -5.94  |
| P35579 MYH9_HUMAN Myosin-9 | 132 | Phosphoryl STY(11)                      | HEMPPHIYAITDTAYR           | 143  | 16 | 5 | 43.79 | b4_H3PO4<br>b3b4b9b10y8_H3PO4 y8 | 1994.88 | 44.017  | 39500  | 3 | 665.63  | 1.65   |
| P35579 MYH9_HUMAN Myosin-9 | 133 | Phosphoryl STY(10)                      | VSHLLGINVDFTR              | 373  | 14 | 4 | 18.27 | b10y4*y4y10                      | 1651.81 | 77.075  | 9364   | 2 | 826.41  | 1.92   |
| P35579 MYH9_HUMAN Myosin-9 | 134 | Phosphoryl STY(4)                       | QIATLHAQVADMK              | 1357 | 13 | 7 | 39.34 | b5b10y3_HPO3<br>y3y8*y8*y8y9     | 1505.73 | 21.591  | 4901   | 3 | 502.58  | 13.62  |
| P35579 MYH9_HUMAN Myosin-9 | 135 | Phosphoryl STY(5)                       | NLPIYSEEIVEMYK             | 125  | 14 | 4 | 31.53 | b7b9y8y9                         | 1807.80 | 55.285  | 4570   | 4 | 452.70  | -8.64  |
| P35579 MYH9_HUMAN Myosin-9 | 136 | Phosphoryl STY(6)                       | TVGQLYKEQLAK               | 644  | 12 | 4 | 38.69 | b8y6y7y8                         | 1457.74 | 45.881  | 3086   | 3 | 486.59  | 7.20   |
| P35579 MYH9_HUMAN Myosin-9 | 137 | Phosphoryl STY(9)                       | IAEFTTNTTEEEK              | 1000 | 14 | 3 | 23.71 | b7y3y4                           | 1733.74 | 61.426  | 2365   | 2 | 867.37  | -2.46  |
| P35579 MYH9_HUMAN Myosin-9 | 138 | Carbamidomethyl+C(8);<br>Oxidation+M(5) | LQAQMKDCMRELDTR            | 1642 | 16 | 3 | 16.24 | b5b7y8                           | 2025.89 | 82.123  | 246433 | 3 | 675.97  | -14.46 |
| P35579 MYH9_HUMAN Myosin-9 | 139 | Oxidation+M(12)                         | LTEMETLQSQLMAEK            | 867  | 15 | 3 | 25.25 | b6b7b13                          | 1767.84 | 104.038 | 82534  | 2 | 884.43  | -4.00  |
| P35579 MYH9_HUMAN Myosin-9 | 140 | Oxidation+M(9)                          | ALEQQVEEMK                 | 1528 | 10 | 3 | 25.72 | b4b9y8                           | 1220.60 | 52.388  | 17145  | 2 | 610.80  | 11.70  |
| P35579 MYH9_HUMAN Myosin-9 | 141 | Oxidation+M(2)                          | IMGPEEQMGLLR               | 327  | 14 | 3 | 26.05 | y7y8y12                          | 1631.83 | 61.182  | 5737   | 3 | 544.61  | 7.71   |
| P35579 MYH9_HUMAN Myosin-9 | 142 | Oxidation+M(6)                          | ALEEAMEQK                  | 1483 | 9  | 3 | 29.25 | b5b7y6                           | 1064.51 | 23.458  | 3212   | 2 | 532.76  | 13.65  |
| P35579 MYH9_HUMAN Myosin-9 | 143 | Oxidation+M(4)                          | HEAMITDLEER                | 1024 | 11 | 3 | 23.16 | b3y3y7                           | 1359.63 | 136.328 | 2472   | 1 | 1359.63 | 9.43   |
| P35579 MYH9_HUMAN Myosin-9 | 144 | Oxidation+M(1)                          | MQQNIQELEEELVEEESAR        | 940  | 19 | 3 | 14.15 | b3b8y10                          | 2349.06 | 71.099  | 1814   | 2 | 1175.03 | 1.77   |
| P35579 MYH9_HUMAN Myosin-9 | 145 | Oxidation+M(3)                          | TEMEDLMSSKDDVVGK           | 1503 | 15 | 5 | 40.04 | y3y9y12*y12y14                   | 1700.74 | 61.978  | 1551   | 4 | 425.94  | 1.65   |
| P35579 MYH9_HUMAN Myosin-9 | 146 |                                         | FLSNGHVITIPGQ              | 301  | 12 | 1 | 7.24  | y4                               | 1269.68 | 48.538  | 18839  | 3 | 423.90  | 14.13  |
| P35579 MYH9_HUMAN Myosin-9 | 147 |                                         | PHLVLDQLR                  | 684  | 9  | 1 | 7.66  | b3                               | 1090.64 | 70.497  | 15807  | 2 | 545.82  | 0.56   |
| P35579 MYH9_HUMAN Myosin-9 | 148 |                                         | GVLAHLEER                  | 765  | 10 | 0 | 2.7   |                                  | 1152.61 | 48.937  | 9715   | 2 | 576.81  | 6.57   |
| P35579 MYH9_HUMAN Myosin-9 | 149 | Carbamidomethyl+C(2)                    | FCIIHYAGK                  | 567  | 9  | 0 | 2.7   |                                  | 1108.56 | 58.030  | 6795   | 2 | 554.79  | 2.42   |
| P35579 MYH9_HUMAN Myosin-9 | 150 |                                         | SNGHVTIPGQDK               | 303  | 13 | 3 | 14.43 | b3*b3b5                          | 1380.68 | 48.507  | 6132   | 2 | 690.85  | -1.33  |
| P35579 MYH9_HUMAN Myosin-9 | 151 |                                         | LAHLEER                    | 767  | 8  | 1 | 7.66  | b3                               | 996.51  | 48.966  | 6068   | 2 | 498.76  | -3.86  |
| P35579 MYH9_HUMAN Myosin-9 | 152 |                                         | DPHLVLDQLR                 | 683  | 10 | 0 | 2.7   |                                  | 1205.66 | 70.503  | 4601   | 2 | 603.34  | -0.81  |
| P35579 MYH9_HUMAN Myosin-9 | 153 | Carbamidomethyl+C(5)                    | DSVGCLEAEVVK               | 1374 | 13 | 0 | 4.5   |                                  | 1436.65 | 52.912  | 3434   | 2 | 718.83  | -6.03  |
| P35579 MYH9_HUMAN Myosin-9 | 154 |                                         | ATLHAQVADMK                | 1359 | 11 | 4 | 27.06 | b4b5b9*b9                        | 1184.60 | 45.861  | 1731   | 2 | 592.81  | -3.71  |
| P35579 MYH9_HUMAN Myosin-9 | 155 |                                         | EEVGEEAIVLVENGK            | 47   | 17 | 0 | 5.4   |                                  | 1853.94 | 74.902  | 13219  | 3 | 618.65  | -1.51  |
| P35579 MYH9_HUMAN Myosin-9 | 156 |                                         | IIGLDQVAGMSETALPGAFK       | 617  | 20 | 0 | 6.75  |                                  | 2000.02 | 89.241  | 5501   | 3 | 667.35  | -13.43 |
| P35579 MYH9_HUMAN Myosin-9 | 157 |                                         | THEAQIQEMR                 | 1181 | 10 | 0 | 2.25  |                                  | 1225.55 | 27.757  | 3909   | 3 | 409.19  | -8.27  |

|                                              |     |                      |                              |      |    |    |        |                                                                                  |         |         |        |   |         |        |
|----------------------------------------------|-----|----------------------|------------------------------|------|----|----|--------|----------------------------------------------------------------------------------|---------|---------|--------|---|---------|--------|
| P35579 MYH9_HUMAN Myosin-9                   | 158 |                      | ASITALEAK                    | 1806 | 9  | 0  | 1.8    |                                                                                  | 885.49  | 41.326  | 2538   | 2 | 443.25  | -5.38  |
| P35579 MYH9_HUMAN Myosin-9                   | 159 | Carbamidomethyl+C(4) | ADFCIIHYAGK                  | 565  | 11 | 0  | 2.7    |                                                                                  | 1276.60 | 58.036  | 1857   | 3 | 426.20  | -7.84  |
| P35579 MYH9_HUMAN Myosin-9                   | 160 |                      | VKPLLQVSR                    | 833  | 9  | 1  | 8.52   | b5                                                                               | 1022.62 | 42.612  | 1533   | 3 | 341.54  | -14.03 |
| P63104 I433Z_HUMAN 14-3-3 protein zeta/delta | 1   | Carbamidomethyl+C(3) | DICNDVLSLLEK                 | 91   | 12 | 5  | 32.67  | b3y6y7y10y12                                                                     | 1418.72 | 97.843  | 140431 | 2 | 709.86  | -0.34  |
| P63104 I433Z_HUMAN 14-3-3 protein zeta/delta | 2   |                      | NLLSVAYK                     | 41   | 8  | 7  | 34.82  | b1b4*b4y2y3y6y8                                                                  | 907.52  | 57.340  | 117498 | 2 | 454.26  | -3.63  |
| P63104 I433Z_HUMAN 14-3-3 protein zeta/delta | 3   |                      | FLIPNASQAESK                 | 103  | 12 | 11 | 75.84  | b2b3b6y2y4y6y7y9*y9y10y12                                                        | 1304.68 | 54.512  | 113593 | 2 | 652.84  | -1.40  |
| P63104 I433Z_HUMAN 14-3-3 protein zeta/delta | 4   |                      | SVTEQGAELSNEER               | 27   | 14 | 15 | 96.51  | b5*b5b12y2y4y5y7y9*y9y10*y10y11y12*y12y14                                        | 1548.72 | 33.706  | 95673  | 2 | 774.86  | 1.50   |
| P63104 I433Z_HUMAN 14-3-3 protein zeta/delta | 5   |                      | GIVDQSQQAYQEAFEISKK          | 139  | 19 | 11 | 56.13  | b2b3b10b12*b12b14y3y4y12y16y19                                                   | 2169.08 | 67.560  | 90286  | 3 | 723.70  | -2.48  |
| P63104 I433Z_HUMAN 14-3-3 protein zeta/delta | 6   |                      | TAFDEAIAELDTLSEESYKDLTLMQLLR | 193  | 29 | 31 | 200.7  | b2b3b4b5*b5b6*b6b7*b7b8*b8b9b13b15b17y1y2y3y4y5y6y10y13y16y19y20y21y23y24y29*y29 | 3302.64 | 136.594 | 75043  | 3 | 1101.55 | 2.51   |
| P63104 I433Z_HUMAN 14-3-3 protein zeta/delta | 7   | Carbamidomethyl+C(7) | YDDMAACMK                    | 18   | 9  | 9  | 72.26  | b2b3y2y3y4y5y6y8y9                                                               | 1104.42 | 38.010  | 57417  | 2 | 552.71  | 5.53   |
| P63104 I433Z_HUMAN 14-3-3 protein zeta/delta | 8   |                      | GIVDQSQQAYQEAFEISK           | 139  | 18 | 7  | 29.21  | b9*b9b14y6y9y12y18                                                               | 2041.01 | 71.658  | 40438  | 2 | 1021.01 | 12.44  |
| P63104 I433Z_HUMAN 14-3-3 protein zeta/delta | 9   |                      | TAFDEAIAELDTLSEESYK          | 193  | 19 | 7  | 19.44  | b2b7b9*b9y3y6*y6                                                                 | 2131.98 | 100.564 | 13914  | 3 | 711.33  | -5.27  |
| P63104 I433Z_HUMAN 14-3-3 protein zeta/delta | 10  |                      | VVSSIEQK                     | 60   | 8  | 5  | 39.59  | y4y6y7*y7y8                                                                      | 889.49  | 22.123  | 7389   | 2 | 445.25  | -8.78  |
| P63104 I433Z_HUMAN 14-3-3 protein zeta/delta | 11  |                      | YLAEVAAGDDK                  | 127  | 11 | 4  | 23.16  | b2b6b8y5                                                                         | 1151.56 | 67.237  | 3421   | 1 | 1151.56 | 4.88   |
| P63104 I433Z_HUMAN 14-3-3 protein zeta/delta | 12  |                      | KEMQPTHPIR                   | 157  | 10 | 9  | 52.18  | b2*b2b3*b3b4y2y3y6y7                                                             | 1236.64 | 19.688  | 3042   | 3 | 412.88  | -13.33 |
| P63104 I433Z_HUMAN 14-3-3 protein zeta/delta | 13  |                      | IETELR                       | 85   | 6  | 1  | 13.2   | y5                                                                               | 760.42  | 29.748  | 17885  | 2 | 380.71  | -6.18  |
| P63104 I433Z_HUMAN 14-3-3 protein zeta/delta | 14  |                      | VFYLK                        | 115  | 5  | 2  | 25.49  | b3y3                                                                             | 669.39  | 49.899  | 17610  | 2 | 335.20  | -14.13 |
| P63104 I433Z_HUMAN 14-3-3 protein zeta/delta | 15  |                      | TEGAEK                       | 68   | 6  | 1  | 13.2   | b3                                                                               | 634.31  | 85.102  | 2297   | 1 | 634.31  | 12.03  |
| P63104 I433Z_HUMAN 14-3-3 protein zeta/delta | 16  |                      | SVTEQGAELSNEERNLLSVAYK       | 27   | 22 | 4  | 19.3   | b5b7*b7b10                                                                       | 2437.24 | 104.807 | 83672  | 3 | 813.08  | 6.21   |
| P63104 I433Z_HUMAN 14-3-3 protein zeta/delta | 17  |                      | EKIETELR                     | 83   | 8  | 4  | 47.56  | b6y3y4y6                                                                         | 1017.55 | 31.144  | 12327  | 2 | 509.28  | -10.20 |
| P63104 I433Z_HUMAN 14-3-3 protein zeta/delta | 18  | Carbamidomethyl+C(3) | DICNDVLSLLEKFLIPNASQAESK     | 91   | 24 | 4  | 21.44  | b10b11*b11y5                                                                     | 2704.38 | 114.728 | 2931   | 2 | 1352.69 | -1.81  |
| P63104 I433Z_HUMAN 14-3-3 protein zeta/delta | 19  |                      | YLAEVAAGDDKK                 | 127  | 12 | 3  | 25.15  | b7y8y9                                                                           | 1279.65 | 63.841  | 2155   | 2 | 640.33  | -1.24  |
| P63104 I433Z_HUMAN 14-3-3 protein zeta/delta | 20  |                      | QQMAREYR                     | 75   | 8  | 4  | 31.81  | b5b6y3*y3                                                                        | 1081.51 | 22.225  | 1975   | 3 | 361.17  | -9.82  |
| P63104 I433Z_HUMAN 14-3-3 protein zeta/delta | 21  | Phosphoryl STY(10)   | GIVDQSQQAYQEAFEISKK          | 139  | 19 | 3  | 14.15  | b5b8y9                                                                           | 2249.05 | 67.208  | 74395  | 4 | 563.02  | 4.23   |
| P02775 CXCL7_HUMAN Platelet basic protein    | 1   | Carbamidomethyl+C(2) | ICLDPDAPR                    | 103  | 9  | 15 | 86.25  | b2b4b5*b5y1y2y3y5*y5y6y7*y7y8*y8y9                                               | 1056.51 | 45.984  | 635359 | 2 | 528.76  | -0.69  |
| P02775 CXCL7_HUMAN Platelet basic protein    | 2   |                      | GKEESLSDSLYAE LR             | 47   | 15 | 30 | 249.69 | b2b3*b3b4*b4b6*b6b7b9*b9b10b12b14y1y2y3*y3y4y5y6y7y8y9y10y11y12*y12y13*y13y15    | 1724.81 | 63.785  | 633015 | 3 | 575.61  | -12.67 |
| P02775 CXCL7_HUMAN Platelet basic protein    | 3   |                      | NIQSLEVIGK                   | 75   | 10 | 15 | 85.45  | b1b2b3*b3b4y1y2y3y4y5y7y8*y8*y8y10                                               | 1100.63 | 55.986  | 535665 | 2 | 550.82  | -2.77  |

|                                                           |    |                                             |                                |     |    |    |        |                                                                                           |         |         |         |   |         |        |
|-----------------------------------------------------------|----|---------------------------------------------|--------------------------------|-----|----|----|--------|-------------------------------------------------------------------------------------------|---------|---------|---------|---|---------|--------|
| P02775 CXCL7_HUMAN Platelet basic protein                 | 4  | Carbamidomethyl+C(4)                        | GTHCNQVEVIATLK                 | 85  | 14 | 18 | 176.47 | b3b4b5b6b9b10*b10b11b12*b12y3y5y7*y7y10y11y12y14                                          | 1569.78 | 50.695  | 205180  | 3 | 523.93  | -14.85 |
| P02775 CXCL7_HUMAN Platelet basic protein                 | 5  |                                             | EESLSDLYAELR                   | 49  | 13 | 9  | 60.25  | b2b11*b11y2y3y4y7y9y10                                                                    | 1539.73 | 70.232  | 49416   | 2 | 770.37  | 10.15  |
| P02775 CXCL7_HUMAN Platelet basic protein                 | 6  |                                             | GQTK                           | 38  | 4  | 2  | 12.3   | b3*b3                                                                                     | 433.24  | 93.224  | 2923    | 1 | 433.24  | 7.40   |
| P02775 CXCL7_HUMAN Platelet basic protein                 | 7  |                                             | GKEESLSDLYAELR                 | 47  | 15 | 6  | 38.02  | b3b10b13*b13b14y13                                                                        | 1724.83 | 91.603  | 1053972 | 2 | 862.92  | -0.50  |
| P02775 CXCL7_HUMAN Platelet basic protein                 | 8  | Carbamidomethyl+C(3)                        | KICLDPDAPR                     | 102 | 10 | 11 | 107.23 | b5*b5b7b9y3y5*y5y7y8y9*y9                                                                 | 1184.61 | 40.624  | 101095  | 2 | 592.81  | 1.85   |
| P02775 CXCL7_HUMAN Platelet basic protein                 | 9  | Carbamidomethyl+C(14);Carbamidomethyl+C(16) | EESLSDLYAELRCMCIK              | 49  | 18 | 4  | 25.28  | b3b4b12y5                                                                                 | 2232.01 | 78.159  | 3353    | 2 | 1116.51 | 5.14   |
| P02775 CXCL7_HUMAN Platelet basic protein                 | 10 | Carbamidomethyl+C(4);Phosphoryl STY(12)     | GTHCNQVEVIATLKDGR              | 85  | 17 | 4  | 22.84  | b9_H3PO4 b9b11b13*b13                                                                     | 1977.93 | 74.417  | 2212    | 3 | 659.98  | 7.04   |
| P02775 CXCL7_HUMAN Platelet basic protein                 | 11 |                                             | LDPDAPR                        | 105 | 7  | 1  | 8.52   | b3                                                                                        | 783.40  | 45.975  | 9390    | 1 | 783.40  | 3.66   |
| P02775 CXCL7_HUMAN Platelet basic protein                 | 12 |                                             | NIQSLEVI                       | 75  | 8  | 0  | 2.25   |                                                                                           | 915.53  | 55.970  | 3954    | 2 | 458.27  | 12.67  |
| P04406 G3P_HUMAN Glyceraldehyde-3-phosphate dehydrogenase | 1  | Carbamidomethyl+C(7);Carbamidomethyl+C(11)  | IISNASCTTNCLAPLAK              | 145 | 17 | 31 | 246.52 | b2b3b7*b7b8b10b11b12*b12*b12b13*b13b15b16y2y3y4y5y6y8y9y11y12*y12y13*y13y14y15*y15y17*y17 | 1833.92 | 53.815  | 185097  | 2 | 917.47  | 2.73   |
| P04406 G3P_HUMAN Glyceraldehyde-3-phosphate dehydrogenase | 2  |                                             | GALQNIIPASTGAAK                | 200 | 15 | 13 | 102.72 | b3b4b5*b5b7y4y7y8*y8y9y10y11y15                                                           | 1411.79 | 59.216  | 165421  | 2 | 706.40  | 1.30   |
| P04406 G3P_HUMAN Glyceraldehyde-3-phosphate dehydrogenase | 3  |                                             | LISWYDNEFGYSNR                 | 309 | 14 | 12 | 134.71 | b6y3y4y5y6y7y8y9y10y11y12y14                                                              | 1763.81 | 75.467  | 164397  | 2 | 882.41  | 4.71   |
| P04406 G3P_HUMAN Glyceraldehyde-3-phosphate dehydrogenase | 4  |                                             | LVINGNPITIFQERDPSK             | 66  | 18 | 9  | 44.16  | b1b2b3y3y8y12y15y16y18                                                                    | 2041.09 | 76.930  | 105338  | 3 | 681.04  | -6.52  |
| P04406 G3P_HUMAN Glyceraldehyde-3-phosphate dehydrogenase | 5  | Carbamidomethyl+C(13)                       | VPTANVSVVDLTCR                 | 234 | 14 | 12 | 110.51 | b5b6b12y4y5y6y8y10y12y13y14*y14                                                           | 1530.81 | 60.775  | 103079  | 2 | 765.91  | 7.26   |
| P04406 G3P_HUMAN Glyceraldehyde-3-phosphate dehydrogenase | 6  |                                             | VGVNGFGR                       | 5   | 8  | 9  | 39.59  | b2y1y2y4y5*y5y7*y7y8                                                                      | 805.43  | 38.557  | 97057   | 2 | 403.22  | -7.35  |
| P04406 G3P_HUMAN Glyceraldehyde-3-phosphate dehydrogenase | 7  |                                             | VIISAPSADAPMFVMGVNHEK          | 118 | 21 | 16 | 147.84 | b2b3y3y4y6y7y10y11y12y13y14*y14y16y18y19y21                                               | 2213.10 | 74.895  | 81325   | 3 | 738.37  | -3.64  |
| P04406 G3P_HUMAN Glyceraldehyde-3-phosphate dehydrogenase | 8  |                                             | LVINGNPITIFQER                 | 66  | 14 | 8  | 40.45  | b2b3y4*y4y8y10y11y14                                                                      | 1613.90 | 83.591  | 81155   | 2 | 807.45  | -1.74  |
| P04406 G3P_HUMAN Glyceraldehyde-3-phosphate dehydrogenase | 9  |                                             | VDIVAINDPFIDLNYMVFQYDS<br>THGK | 27  | 28 | 17 | 125.66 | b3b4b5b6y2y5y7y8y9*y9y10*y10y11y12y22y24y28                                               | 3308.57 | 124.676 | 24780   | 3 | 1103.53 | 2.80   |
| P04406 G3P_HUMAN Glyceraldehyde-3-phosphate dehydrogenase | 10 |                                             | WGDAGAEYVVSTGVFTTMEK           | 86  | 21 | 4  | 13.18  | b12y3*y3y12                                                                               | 2277.06 | 85.834  | 19033   | 2 | 1139.03 | 9.01   |
| P04406 G3P_HUMAN Glyceraldehyde-3-phosphate dehydrogenase | 11 |                                             | VIPELNGK                       | 219 | 8  | 7  | 39.59  | b1b2y4*y4y5*y5y7                                                                          | 869.52  | 21.587  | 3068    | 2 | 435.26  | 10.04  |

|                                                             |    |                       |                                         |     |    |    |        |                                                                                       |         |         |        |   |        |        |
|-------------------------------------------------------------|----|-----------------------|-----------------------------------------|-----|----|----|--------|---------------------------------------------------------------------------------------|---------|---------|--------|---|--------|--------|
| P04406 G3P_HUMAN Glycerinaldehyde-3-phosphate dehydrogenase | 12 |                       | VIHDNFGIVEGLMTTVHAIATQK                 | 162 | 24 | 31 | 196.54 | b3b4b5°b5b6b7*b7b8°b8*b8b11y3*y3y4*y4y5°y5*y5y6y7y8y10y11°y11*y11y12°y12y15°y15y16y22 | 2595.32 | 102.461 | 235030 | 4 | 649.59 | -16.09 |
| P04406 G3P_HUMAN Glycerinaldehyde-3-phosphate dehydrogenase | 13 |                       | VIISAPSADAPMFVMGVNHEKYD<br>NSLK         | 118 | 27 | 13 | 86.25  | b3b5°b5b15y6y8y10y11y12y13y22y24y25                                                   | 2933.44 | 73.924  | 114917 | 4 | 734.11 | -6.33  |
| P04406 G3P_HUMAN Glycerinaldehyde-3-phosphate dehydrogenase | 14 | Carbamidomethyl+C(20) | LTGMAFRVPTANVSVVDLTCR                   | 227 | 21 | 5  | 20.53  | b3°b3y4y6y8                                                                           | 2307.19 | 79.317  | 33039  | 3 | 769.74 | -0.85  |
| P04406 G3P_HUMAN Glycerinaldehyde-3-phosphate dehydrogenase | 15 |                       | VVDLMAHMASKE                            | 323 | 12 | 3  | 25.15  | b10y9y10                                                                              | 1330.64 | 53.311  | 32803  | 3 | 444.22 | -8.72  |
| P04406 G3P_HUMAN Glycerinaldehyde-3-phosphate dehydrogenase | 16 |                       | WGDAGAEYVVESTGVFTTMEKA<br>GAHLQGGAK     | 86  | 31 | 3  | 16.87  | b4b10b12                                                                              | 3167.53 | 96.355  | 18404  | 5 | 634.31 | 5.09   |
| P04406 G3P_HUMAN Glycerinaldehyde-3-phosphate dehydrogenase | 17 |                       | AAFNSGKVDIVAINDPFIDLNYMV<br>YMFQYDSTHGK | 20  | 35 | 19 | 79.33  | b3b4b6b9°b9b10°b10b15y3y5°y5y6°y6y7y9y10y12°y12*y12                                   | 3983.88 | 118.268 | 13505  | 4 | 996.72 | -5.64  |
| P04406 G3P_HUMAN Glycerinaldehyde-3-phosphate dehydrogenase | 18 |                       | RVIISAPSADAPMFVMGVNHEK                  | 117 | 22 | 3  | 19.3   | y3y6y21                                                                               | 2369.21 | 69.588  | 11445  | 3 | 790.41 | -1.55  |
| P04406 G3P_HUMAN Glycerinaldehyde-3-phosphate dehydrogenase | 19 | Oxidation+M(12)       | VIISAPSADAPMFVMGVNHEK                   | 118 | 21 | 5  | 26.21  | b8b12y8y9°y9                                                                          | 2229.10 | 36.445  | 102408 | 4 | 558.03 | -3.40  |
| P04406 G3P_HUMAN Glycerinaldehyde-3-phosphate dehydrogenase | 20 |                       | VDIVAINDPFIDLNYMVYMFQYD<br>T            | 27  | 25 | 0  | 10.34  |                                                                                       | 2986.35 | 124.732 | 57344  | 3 | 996.12 | -12.83 |
| P04406 G3P_HUMAN Glycerinaldehyde-3-phosphate dehydrogenase | 21 |                       | GVNGFGR                                 | 6   | 7  | 1  | 9.32   | b4                                                                                    | 706.36  | 38.588  | 7409   | 1 | 706.36 | -10.63 |
| P02776 PLF4_HUMAN Platelet factor 4                         | 1  | Carbamidomethyl+C(5)  | AGPHCPTAQLIATLK                         | 62  | 15 | 15 | 128.88 | b4b5b7°b7b8b9b13b14y3y4°y4y5y7y11y15                                                  | 1577.83 | 60.177  | 323805 | 3 | 526.61 | -10.68 |
| P02776 PLF4_HUMAN Platelet factor 4                         | 2  |                       | HITSLEVIK                               | 53  | 9  | 13 | 88.01  | b1b2b4°b4b5°b5b6b7y2y4y7y8y9                                                          | 1039.61 | 47.186  | 291088 | 2 | 520.31 | -1.29  |
| P02776 PLF4_HUMAN Platelet factor 4                         | 3  | Carbamidomethyl+C(2)  | ICLDLQAPLYKK                            | 81  | 12 | 16 | 119.82 | b1b2b3b4b5°b5b7b8b9y1y2y3y5y6y10y12                                                   | 1461.79 | 64.937  | 176970 | 3 | 487.94 | -13.11 |
| P02776 PLF4_HUMAN Platelet factor 4                         | 4  | Carbamidomethyl+C(2)  | ICLDLQAPLYK                             | 81  | 11 | 9  | 61.39  | b2b3b5y2y6y8y9y10y11                                                                  | 1333.72 | 72.928  | 132640 | 2 | 667.36 | -2.47  |
| P02776 PLF4_HUMAN Platelet factor 4                         | 5  | Carbamidomethyl+C(3)  | KICLDLQAPLYK                            | 80  | 12 | 4  | 38.57  | b5b6y4y5                                                                              | 1461.82 | 66.550  | 53071  | 2 | 731.41 | 3.51   |
| P68366 TBA4A_HUMAN Tubulin alpha-4A chain                   | 1  |                       | VGINYQPPTVVPGGDLAK                      | 352 | 18 | 16 | 67.07  | b4*b4b5°b5b6°b6b7°b7b11°b11y1y2y8y12y14y18                                            | 1825.00 | 64.922  | 216139 | 2 | 913.00 | 5.55   |
| P68366 TBA4A_HUMAN Tubulin alpha-4A chain                   | 2  |                       | NLDIERPTYTNLNR                          | 215 | 14 | 16 | 60.05  | b2*b2b3°b3b5°b5b7y2y4*y4y7y8y12*y12y14*y14                                            | 1718.86 | 51.755  | 209644 | 3 | 573.63 | -11.43 |
| P68366 TBA4A_HUMAN Tubulin alpha-4A chain                   | 3  |                       | QLFHPEQLITGKEDAANNYAR                   | 84  | 21 | 11 | 53.17  | b6*b6y2y3y5y6y7y9y12y21*y21                                                           | 2415.17 | 61.209  | 194281 | 4 | 604.55 | -13.34 |
| P68366 TBA4A_HUMAN Tubulin alpha-4A chain                   | 4  |                       | AVFVDLEPTVIDEIR                         | 64  | 15 | 27 | 226.15 | b2b3b4b5°b5b6b7°b7b10°b10b11b12y2y3°y3y4°y4y5y7y8y9°y9y10y11y12y13y15                 | 1715.92 | 88.179  | 164597 | 2 | 858.47 | 0.85   |
| P68366 TBA4A_HUMAN Tubulin alpha-4A chain                   | 5  | Carbamidomethyl+C(8)  | SIQFVDWCPTGFK                           | 339 | 13 | 19 | 191.78 | b3b4b5°b5b6b9b11°b11b12y2y3y4y5y6y7y9y10y12y13                                        | 1584.75 | 81.861  | 128587 | 2 | 792.88 | 1.54   |
| P68366 TBA4A_HUMAN Tubulin alpha-4A chain                   | 6  | Carbamidomethyl+C(3)  | AVCMLSNTTAAIAEAWAR                      | 373 | 17 | 7  | 37.33  | b8y4y8y11°y11*y11y16                                                                  | 1864.91 | 83.137  | 85045  | 2 | 932.96 | 3.34   |



|                                           |    |                                               |                                     |      |    |    |        |                                                                                                          |         |         |        |   |         |       |
|-------------------------------------------|----|-----------------------------------------------|-------------------------------------|------|----|----|--------|----------------------------------------------------------------------------------------------------------|---------|---------|--------|---|---------|-------|
| P68366 TBA4A_HUMAN Tubulin alpha-4A chain | 7  |                                               | EIIDPVLDR                           | 112  | 9  | 4  | 37.03  | y5y6y7y9                                                                                                 | 1069.59 | 58.890  | 79813  | 2 | 535.30  | -2.51 |
| P68366 TBA4A_HUMAN Tubulin alpha-4A chain | 8  | Carbamidomethyl+C(15)                         | AYHEQLSVAEITNACFEPANQMV<br>K        | 280  | 24 | 7  | 32.35  | b10b11b14y1y7y11y13                                                                                      | 2750.30 | 72.595  | 73730  | 3 | 917.44  | 4.79  |
| P68366 TBA4A_HUMAN Tubulin alpha-4A chain | 9  |                                               | FDGALNVDLTFEQTNLVPYPR               | 243  | 21 | 11 | 54.9   | b2b3b4b16b17b21y2y4y5y<br>11y21                                                                          | 2409.22 | 93.917  | 46804  | 2 | 1205.11 | 3.75  |
| P68366 TBA4A_HUMAN Tubulin alpha-4A chain | 10 | Carbamidomethyl+C(14)                         | TIGGGDDSFITFFCETGAGK                | 40   | 20 | 12 | 60     | b2y2y3y6*y6y9y11*y11y15<br>*y15y18y20                                                                    | 2067.92 | 80.351  | 45682  | 2 | 1034.46 | 9.92  |
| P68366 TBA4A_HUMAN Tubulin alpha-4A chain | 11 |                                               | LISQIVSSITASLR                      | 229  | 14 | 5  | 18.27  | b5*b5y4y8y14                                                                                             | 1487.88 | 99.046  | 34411  | 2 | 744.44  | 1.80  |
| P68366 TBA4A_HUMAN Tubulin alpha-4A chain | 12 |                                               | LSVDYGKK                            | 156  | 8  | 5  | 39.59  | b2y4y5y7y8                                                                                               | 909.50  | 28.259  | 28744  | 2 | 455.25  | -6.64 |
| P68366 TBA4A_HUMAN Tubulin alpha-4A chain | 13 |                                               | AFVHWYVGEEMEEGFSEARED<br>MAALEK     | 402  | 28 | 4  | 16.47  | b3b7b14y10                                                                                               | 3217.46 | 93.270  | 3832   | 3 | 1073.16 | 10.78 |
| P68366 TBA4A_HUMAN Tubulin alpha-4A chain | 14 | Carbamidomethyl+C(4);<br>Carbamidomethyl+C(5) | YMACCLLYRGDVVVK                     | 311  | 15 | 5  | 35.18  | b9b10b13y3y13                                                                                            | 1844.88 | 63.193  | 46534  | 3 | 615.63  | -1.59 |
| P68366 TBA4A_HUMAN Tubulin alpha-4A chain | 15 |                                               | QLFHPEQLITGKEDAANNYAR               | 84   | 21 | 6  | 28.11  | b4b7*b7y6y11y12                                                                                          | 2415.18 | 106.466 | 5675   | 2 | 1208.09 | -9.50 |
| P68366 TBA4A_HUMAN Tubulin alpha-4A chain | 16 | Carbamidomethyl+C(5);<br>Phosphoryl STY(16)   | LSDQCTGLQGFLVFHSGGGTGS<br>GFTSLLMER | 124  | 32 | 3  | 22.6   | b6b15b16                                                                                                 | 3486.60 | 81.011  | 51572  | 4 | 872.40  | 5.81  |
| P68366 TBA4A_HUMAN Tubulin alpha-4A chain | 17 | Carbamidomethyl+C(5);<br>Oxidation+M(30)      | LSDQCTGLQGFLVFHSGGGTGS<br>GFTSLLMER | 124  | 32 | 11 | 43.24  | b8b11b12*b12*b12b13b22<br>y5y9y14*y14                                                                    | 3422.60 | 118.272 | 11883  | 5 | 685.33  | -5.06 |
| P68366 TBA4A_HUMAN Tubulin alpha-4A chain | 18 | Carbamidomethyl+C(4)                          | TFFCETGAGK                          | 50   | 10 | 0  | 6.75   |                                                                                                          | 1117.51 | 80.329  | 2845   | 1 | 1117.51 | 13.98 |
| P68366 TBA4A_HUMAN Tubulin alpha-4A chain | 19 |                                               | EIIDPVLDR                           | 112  | 9  | 0  | 1.8    |                                                                                                          | 1051.57 | 58.896  | 4891   | 2 | 526.29  | 0.81  |
| P18206 VINC_HUMAN Vinculin                | 1  |                                               | TIESILEPVAQQISHLVIMHEEGEV<br>DGK    | 7    | 28 | 34 | 235.76 | b1b2*b2b3*b3b4*b4b5*b5b<br>6*b6y2y3y4y5y7y8*y8y9y1<br>0y11y13*y13y14y15y19y21<br>*y21y22*y22y23y25y26y28 | 3101.55 | 109.778 | 246855 | 4 | 776.14  | -9.68 |
| P18206 VINC_HUMAN Vinculin                | 2  |                                               | QVATALQNLQTK                        | 464  | 12 | 26 | 130.35 | b2*b2b3*b3b4*b4b6*b<br>6b12y2y3*y3*y3y4y5*y5y6<br>*y6*y6y7y9y10*y10y11y12                                | 1314.74 | 47.689  | 166563 | 2 | 657.87  | 0.65  |
| P18206 VINC_HUMAN Vinculin                | 3  |                                               | AQQVSQGLDVLTAK                      | 352  | 14 | 19 | 121.7  | b2*b2b3b4*b4b7b12*b12y<br>1y2y3y4y6y8y10y11y12*y<br>12y14                                                | 1457.80 | 57.230  | 141336 | 2 | 729.40  | 4.69  |
| P18206 VINC_HUMAN Vinculin                | 4  |                                               | TNISDEESEQATEMLVHNAQNL<br>MSVK      | 1076 | 27 | 24 | 126.97 | b1*b1b2*b2*b2b3*b3b4*b<br>4b5*b5b6y1y3y5y10y11y1<br>2y17y20y22y24y25y27                                  | 3046.41 | 95.442  | 137808 | 3 | 1016.14 | 0.56  |
| P18206 VINC_HUMAN Vinculin                | 5  |                                               | AIPDLTAPVAAVQAASNLVR                | 35   | 21 | 19 | 143.5  | b2b3b4b6b7*b7y2y3y4*y4<br>y5y6y7y8y14y15y16y19y2<br>1                                                    | 2076.19 | 117.250 | 123437 | 2 | 1038.60 | 2.94  |
| P18206 VINC_HUMAN Vinculin                | 6  |                                               | AVAGNISDPGLQK                       | 802  | 13 | 17 | 164.53 | b2b3b4b6b8b9b12*b12y5y<br>6y7*y7y8y9y10y11y13                                                            | 1269.68 | 39.348  | 103375 | 2 | 635.34  | -1.73 |
| P18206 VINC_HUMAN Vinculin                | 7  |                                               | VAMANIQPQLVAGATSIAR                 | 738  | 20 | 14 | 92.21  | b3b4b5*b5b11y1y2y4y5y7<br>y8y13y14y20                                                                    | 2042.10 | 83.287  | 98610  | 2 | 1021.55 | 4.42  |
| P18206 VINC_HUMAN Vinculin                | 8  |                                               | ELTPQVVSAAAR                        | 669  | 11 | 15 | 107.41 | b2b3*b3b10y3y4y5y6y7*y<br>7y8*y8*y8y9y11                                                                 | 1170.65 | 44.994  | 95049  | 2 | 585.83  | 3.23  |
| P18206 VINC_HUMAN Vinculin                | 9  |                                               | IPTISTQLK                           | 1055 | 9  | 6  | 55.79  | b2y4y5y7y8y9                                                                                             | 1000.60 | 51.731  | 91515  | 2 | 500.80  | -4.03 |
| P18206 VINC_HUMAN Vinculin                | 10 |                                               | ELLPVLISAMK                         | 199  | 11 | 10 | 68.38  | b2*b2b3y1y4y5y6y8y9y11                                                                                   | 1213.72 | 90.496  | 87915  | 2 | 607.36  | -4.53 |

|                            |    |                      |                          |      |    |    |        |                                                                    |         |         |       |   |         |        |
|----------------------------|----|----------------------|--------------------------|------|----|----|--------|--------------------------------------------------------------------|---------|---------|-------|---|---------|--------|
| P18206 VINC_HUMAN Vinculin | 11 |                      | MTGLVDEAIDTK             | 708  | 12 | 15 | 117.6  | b2°b2b3°b3b4b6y2y3y5y6y7y8y10y11y12                                | 1292.64 | 56.754  | 87620 | 2 | 646.83  | 2.17   |
| P18206 VINC_HUMAN Vinculin | 12 |                      | VLQLTSWDEDAWASK          | 246  | 15 | 9  | 60.38  | b10b12y6y8y10y11y12°y12y15                                         | 1748.85 | 78.694  | 86458 | 2 | 874.93  | 1.68   |
| P18206 VINC_HUMAN Vinculin | 13 |                      | GWLRDPSASPGDAGEQAIR      | 281  | 19 | 12 | 60.91  | b2b5b8b9°b9b12y1y2y6y8y9y10                                        | 1982.96 | 52.805  | 86437 | 3 | 661.66  | -4.62  |
| P18206 VINC_HUMAN Vinculin | 14 |                      | ALASQLQDSLK              | 570  | 11 | 10 | 64.4   | b2b3b5y1y3y6y7y9*y9y11                                             | 1173.64 | 53.756  | 75496 | 2 | 587.32  | -4.78  |
| P18206 VINC_HUMAN Vinculin | 15 |                      | AGEVINQPMMAAR            | 889  | 14 | 19 | 201.97 | b3b4b5b6b7*b7b11b12b13*b13y3y4y5y6y7y9y10y11y14                    | 1518.73 | 57.828  | 74401 | 2 | 759.87  | 1.93   |
| P18206 VINC_HUMAN Vinculin | 16 |                      | MQEAMTQEVSDVFSDTTPIK     | 586  | 21 | 7  | 20.53  | b4y1y2y3y9y14y21                                                   | 2358.11 | 79.679  | 73969 | 2 | 1179.56 | 8.90   |
| P18206 VINC_HUMAN Vinculin | 17 |                      | ETVQTTEQILKR             | 59   | 13 | 17 | 117.84 | b2°b2b5b10y1y2y3y4y5*y5y6y7y8y9y10*y10y13                          | 1560.82 | 46.000  | 72246 | 3 | 520.94  | -3.75  |
| P18206 VINC_HUMAN Vinculin | 18 |                      | LVQAAQMLQSDPYSPAR        | 87   | 18 | 24 | 159.22 | b1b2b7*b7b11b13b14b15°b15y1y3y4y5y6y7y8y10y11°y11*y11y12°y12y14y18 | 1974.03 | 65.078  | 71654 | 2 | 987.52  | 8.16   |
| P18206 VINC_HUMAN Vinculin | 19 |                      | STVEGIQASVK              | 655  | 11 | 10 | 79.18  | b2°b2y3y4y6y7y8°y8y9y11                                            | 1118.60 | 38.907  | 71022 | 2 | 559.80  | -5.02  |
| P18206 VINC_HUMAN Vinculin | 20 |                      | LLAVAATAPPDAPNR          | 607  | 15 | 10 | 70.71  | b2b8y3y7y8y9y10y11°y11y15                                          | 1476.83 | 50.213  | 70855 | 2 | 738.92  | 5.46   |
| P18206 VINC_HUMAN Vinculin | 21 |                      | VMLVNSMNTVK              | 188  | 11 | 9  | 33.68  | b2b3b6°b6y2y7*y7y9y11                                              | 1235.65 | 53.993  | 65386 | 2 | 618.33  | -0.49  |
| P18206 VINC_HUMAN Vinculin | 22 |                      | MALLMAEMSR               | 993  | 10 | 7  | 50.42  | b3b6y2y4y6y7y10                                                    | 1152.56 | 71.778  | 57935 | 2 | 576.78  | -1.27  |
| P18206 VINC_HUMAN Vinculin | 23 |                      | LLAVAATAPPDAPNREEVFDER   | 607  | 22 | 10 | 32.95  | b2b3b5y1y2y11y13y14y16y22                                          | 2381.21 | 61.143  | 54569 | 3 | 794.41  | -0.62  |
| P18206 VINC_HUMAN Vinculin | 24 |                      | WIDNPTVDDR               | 502  | 10 | 12 | 83.69  | b3b7*b7y2y5y6y7°y7y8y9*y9y10                                       | 1230.58 | 47.146  | 52695 | 2 | 615.79  | 5.16   |
| P18206 VINC_HUMAN Vinculin | 25 |                      | NPGNQAAAYEHFETMK         | 684  | 15 | 6  | 35.18  | b3b7y8y9y12y15                                                     | 1736.77 | 46.078  | 40471 | 3 | 579.59  | -1.27  |
| P18206 VINC_HUMAN Vinculin | 26 | Carbamidomethyl+C(7) | TNLLQVCER                | 1046 | 9  | 4  | 29.25  | b5y6y7y9                                                           | 1132.58 | 49.965  | 32357 | 2 | 566.80  | 4.10   |
| P18206 VINC_HUMAN Vinculin | 27 |                      | DPSASPGDAGEQAIR          | 285  | 15 | 14 | 71.2   | b4b10b13*b13y2y7*y7y9y10y11*y11y14°y14y15                          | 1470.69 | 34.082  | 17688 | 2 | 735.85  | 3.49   |
| P18206 VINC_HUMAN Vinculin | 28 |                      | GILSGTSDLLTFDEAEVR       | 113  | 19 | 8  | 45.75  | b5y5y6°y6y7y9y15y19                                                | 2036.06 | 99.599  | 16460 | 2 | 1018.54 | 4.32   |
| P18206 VINC_HUMAN Vinculin | 29 |                      | QILDEAGK                 | 300  | 8  | 5  | 34.82  | b7°b7y3y6y8                                                        | 873.47  | 49.631  | 16441 | 1 | 873.47  | -2.45  |
| P18206 VINC_HUMAN Vinculin | 30 |                      | ILGAVAK                  | 823  | 7  | 5  | 39.14  | y2y3y5y6y7                                                         | 671.45  | 31.761  | 11084 | 1 | 671.45  | 7.18   |
| P18206 VINC_HUMAN Vinculin | 31 |                      | GNDIIAAAKR               | 983  | 10 | 4  | 35.72  | y4y5y6y10                                                          | 1028.59 | 31.287  | 9875  | 2 | 514.80  | 1.54   |
| P18206 VINC_HUMAN Vinculin | 32 |                      | ERDDILR                  | 426  | 7  | 7  | 48.87  | b2b3°b3b4b6y2y5                                                    | 916.50  | 24.407  | 4619  | 2 | 458.75  | 14.65  |
| P18206 VINC_HUMAN Vinculin | 33 |                      | MPVFHTR                  | 0    | 7  | 5  | 36.13  | b3b7y4°y4y5                                                        | 887.45  | 31.174  | 2437  | 2 | 444.23  | -8.73  |
| P18206 VINC_HUMAN Vinculin | 34 |                      | MLGQMTDQVADLR            | 326  | 13 | 5  | 32.54  | b9y4y7°y7y12                                                       | 1477.73 | 40.701  | 25220 | 3 | 493.25  | 11.73  |
| P18206 VINC_HUMAN Vinculin | 35 |                      | ILLVAK                   | 762  | 6  | 4  | 51.43  | b3y3y4y5                                                           | 656.46  | 45.634  | 16758 | 2 | 328.73  | -12.09 |
| P18206 VINC_HUMAN Vinculin | 36 |                      | GILEYLTVAEVVETMEDLVITYTK | 139  | 23 | 7  | 46.49  | y3y4y9y11°y11y16y21                                                | 2616.33 | 136.843 | 11988 | 3 | 872.78  | -0.65  |
| P18206 VINC_HUMAN Vinculin | 37 |                      | IFVTTK                   | 210  | 6  | 1  | 13.2   | y5                                                                 | 708.42  | 34.302  | 11620 | 2 | 354.71  | -11.37 |
| P18206 VINC_HUMAN Vinculin | 38 |                      | DDILR                    | 428  | 5  | 1  | 12.75  | y3                                                                 | 631.34  | 98.331  | 9970  | 1 | 631.34  | 3.87   |
| P18206 VINC_HUMAN Vinculin | 39 |                      | DYLDGSR                  | 105  | 8  | 4  | 34.82  | b7y4y7°y7                                                          | 938.45  | 44.887  | 8350  | 1 | 938.45  | -4.88  |
| P18206 VINC_HUMAN Vinculin | 40 | Carbamidomethyl+C(6) | EILGTCK                  | 319  | 7  | 4  | 39.14  | y3y4°y4y5                                                          | 820.42  | 29.462  | 5676  | 2 | 410.71  | -4.46  |
| P18206 VINC_HUMAN Vinculin | 41 |                      | EEVFDER                  | 622  | 7  | 6  | 64.63  | b3b4y4°y4y5y6                                                      | 923.42  | 28.752  | 3411  | 2 | 462.21  | 8.39   |
| P18206 VINC_HUMAN Vinculin | 42 |                      | ASDEVTR                  | 1024 | 7  | 3  | 39.14  | b6y3y5                                                             | 777.39  | 29.481  | 2759  | 2 | 389.20  | 16.80  |
| P18206 VINC_HUMAN Vinculin | 43 |                      | SLLDASEEAIK              | 720  | 11 | 5  | 30.14  | b4°b4b8b9°b9                                                       | 1175.60 | 21.592  | 2439  | 3 | 392.54  | -13.91 |
| P18206 VINC_HUMAN Vinculin | 44 |                      | NQWIDNVEK                | 699  | 9  | 6  | 52.78  | y4y5°y5y6*y6y8                                                     | 1145.54 | 36.464  | 2117  | 2 | 573.28  | -12.57 |
| P18206 VINC_HUMAN Vinculin | 45 |                      | LEAMTNSK                 | 373  | 8  | 5  | 47.56  | b4b5b6y5*y5                                                        | 893.43  | 25.321  | 1714  | 2 | 447.22  | -8.20  |

|                               |    |                       |                                 |      |    |    |        |                                                                          |         |         |        |   |         |        |
|-------------------------------|----|-----------------------|---------------------------------|------|----|----|--------|--------------------------------------------------------------------------|---------|---------|--------|---|---------|--------|
| IP18206 VINC_HUMAN Vinculin   | 46 |                       | IDAAQNWLADPNNGGPEGEEQIR         | 387  | 22 | 6  | 28.25  | b4b6b7°b7b12°b12                                                         | 2380.09 | 113.285 | 1667   | 3 | 794.03  | -11.69 |
| IP18206 VINC_HUMAN Vinculin   | 47 |                       | GQGSSPVAMQK                     | 341  | 11 | 5  | 23.16  | b7°b7b10°b10y7                                                           | 1089.53 | 118.405 | 1599   | 1 | 1089.53 | -9.19  |
| IP18206 VINC_HUMAN Vinculin   | 48 | Carbamidomethyl+C(5)  | VGELCAGK                        | 308  | 8  | 3  | 39.59  | y3y5y6                                                                   | 833.43  | 40.863  | 1522   | 2 | 417.22  | 9.37   |
| IP18206 VINC_HUMAN Vinculin   | 49 | Carbamidomethyl+C(13) | DMPPAFIKVENACTK                 | 72   | 15 | 3  | 17.17  | b11y8y12                                                                 | 1720.86 | 62.046  | 114396 | 4 | 430.97  | 13.41  |
| IP18206 VINC_HUMAN Vinculin   | 50 |                       | LANVMMGPYRQDLAK                 | 528  | 16 | 4  | 33.68  | y4y11y12y14                                                              | 1819.94 | 65.957  | 78524  | 3 | 607.32  | -6.77  |
| IP18206 VINC_HUMAN Vinculin   | 51 |                       | KIDAAQNWLADPNNGGPEGEEQIR        | 386  | 23 | 9  | 49.57  | b7b11b15y4y6y10y12*y12<br>y14                                            | 2508.21 | 61.243  | 77756  | 3 | 836.74  | -0.97  |
| IP18206 VINC_HUMAN Vinculin   | 52 | Carbamidomethyl+C(6)  | EVAKQCTDK                       | 1034 | 9  | 3  | 37.03  | b6b7b8                                                                   | 1078.53 | 65.835  | 71016  | 2 | 539.77  | 10.19  |
| IP18206 VINC_HUMAN Vinculin   | 53 | Carbamidomethyl+C(13) | QILDEAGKVVELCAGK                | 300  | 16 | 3  | 24.61  | y6y7y12                                                                  | 1687.85 | 53.940  | 43351  | 3 | 563.29  | -11.28 |
| IP18206 VINC_HUMAN Vinculin   | 54 |                       | MSAEINEIRVLQLTSWDEDAWAS<br>K    | 236  | 25 | 4  | 26.88  | y5y7y8y14                                                                | 2905.40 | 88.721  | 30937  | 3 | 969.14  | -12.27 |
| IP18206 VINC_HUMAN Vinculin   | 55 |                       | EAVKAASDELSK                    | 780  | 12 | 3  | 28.38  | b3b8b9                                                                   | 1247.63 | 49.182  | 22926  | 2 | 624.32  | -11.06 |
| IP18206 VINC_HUMAN Vinculin   | 56 |                       | LVQAAQMLQSDPYSVPARDYLID<br>GSR  | 87   | 26 | 4  | 17.34  | b15y5y15y21                                                              | 2893.47 | 76.028  | 20284  | 3 | 965.16  | 6.58   |
| IP18206 VINC_HUMAN Vinculin   | 57 | Carbamidomethyl+C(1)  | CDRVDQLTAQLADLAAR               | 544  | 17 | 5  | 48.71  | b5b6b7y5y6                                                               | 1915.97 | 78.714  | 17379  | 2 | 958.49  | 1.21   |
| IP18206 VINC_HUMAN Vinculin   | 58 | Carbamidomethyl+C(6)  | KIAELCDDPK                      | 416  | 10 | 4  | 32.71  | y6°y6y8y9                                                                | 1188.61 | 61.939  | 17148  | 2 | 594.81  | 11.71  |
| IP18206 VINC_HUMAN Vinculin   | 59 |                       | NQGIEEALKNR                     | 219  | 11 | 3  | 26.17  | b9b10y3                                                                  | 1271.66 | 50.221  | 14622  | 2 | 636.34  | -5.09  |
| IP18206 VINC_HUMAN Vinculin   | 60 |                       | MTGLVDEAIDTKSLLDASEEAIK         | 708  | 23 | 4  | 19.04  | b8b10b14y3                                                               | 2449.22 | 69.497  | 6770   | 3 | 817.08  | -6.58  |
| IP18206 VINC_HUMAN Vinculin   | 61 |                       | KLEAMTNSK                       | 372  | 9  | 10 | 76.52  | b3b8*b8y4*y4y5y7°y7y8°y<br>8                                             | 1021.53 | 19.693  | 3435   | 2 | 511.27  | -7.41  |
| IP18206 VINC_HUMAN Vinculin   | 62 |                       | DYLDGSRGILSGTSDLLLTFDEAE<br>VR  | 105  | 27 | 3  | 11.49  | b9y4y9                                                                   | 2955.53 | 116.546 | 3294   | 3 | 985.85  | 11.07  |
| IP18206 VINC_HUMAN Vinculin   | 63 |                       | ARMQEAMTQEVSDVFSDTTPIK          | 584  | 23 | 3  | 22.53  | y6y7y12                                                                  | 2585.25 | 101.122 | 2872   | 3 | 862.42  | 10.95  |
| IP18206 VINC_HUMAN Vinculin   | 64 |                       | QGKGDSPER                       | 450  | 10 | 3  | 27.48  | b4y6y7                                                                   | 1044.50 | 94.882  | 2695   | 1 | 1044.50 | -2.34  |
| IP18206 VINC_HUMAN Vinculin   | 65 |                       | ARGQGSSPVAMQK                   | 339  | 13 | 7  | 24.35  | b7°b7°b7b8°b8°b8y7                                                       | 1316.66 | 21.532  | 2202   | 2 | 658.83  | -9.64  |
| IP18206 VINC_HUMAN Vinculin   | 66 | Carbamidomethyl+C(6)  | EILGTCKMLGQMTDQVADLR            | 319  | 20 | 3  | 13.63  | b6b8y8                                                                   | 2279.13 | 105.865 | 1859   | 3 | 760.38  | 4.61   |
| IP18206 VINC_HUMAN Vinculin   | 67 | Phosphoryl STY(8)     | ELTPQVVAAR                      | 669  | 11 | 3  | 26.17  | b8_H3PO4 b8b9y3                                                          | 1250.60 | 98.203  | 10081  | 2 | 625.80  | -3.03  |
| IP18206 VINC_HUMAN Vinculin   | 68 | Phosphoryl STY(7)     | LLAVAATAPPDAPNREEVFDER          | 607  | 22 | 7  | 34.32  | b7°b7b14b15y11y13y15                                                     | 2461.16 | 68.640  | 6997   | 3 | 821.06  | -4.07  |
| IP18206 VINC_HUMAN Vinculin   | 69 | Phosphoryl STY(6)     | SLGEISALTSK                     | 433  | 11 | 3  | 23.16  | b4b7y9_H3PO4 y9                                                          | 1185.57 | 24.415  | 4808   | 2 | 593.29  | 3.09   |
| IP18206 VINC_HUMAN Vinculin   | 70 | Phosphoryl STY(9)     | STVEGIQASVK                     | 655  | 11 | 5  | 26.17  | b6b7°b7°b7y4                                                             | 1198.55 | 74.396  | 2528   | 2 | 599.78  | -7.13  |
| IP18206 VINC_HUMAN Vinculin   | 71 | Phosphoryl STY(5)     | AVANSRPAK                       | 479  | 9  | 4  | 43.75  | b3y5y7y8                                                                 | 993.46  | 33.341  | 1988   | 2 | 497.24  | -13.88 |
| IP18206 VINC_HUMAN Vinculin   | 72 | Oxidation+M(2)        | VMLVNSMNTVK                     | 188  | 11 | 5  | 26.17  | b8b9°b9y6*y6                                                             | 1251.66 | 44.886  | 37356  | 2 | 626.33  | 13.17  |
| IP18206 VINC_HUMAN Vinculin   | 73 | Oxidation+M(19)       | TIESILEPVAQQISHLVMHEEGEV<br>DGK | 7    | 28 | 4  | 24.27  | b3b4y6y12                                                                | 3117.54 | 106.503 | 26959  | 4 | 780.14  | -11.67 |
| IP18206 VINC_HUMAN Vinculin   | 74 | Oxidation+M(1)        | MLGQMTDQVADLR                   | 326  | 13 | 3  | 24.35  | b5y10y11                                                                 | 1493.72 | 104.761 | 5225   | 2 | 747.37  | 10.38  |
| IP18206 VINC_HUMAN Vinculin   | 75 | Oxidation+M(10)       | VAMANIQQPQLVAGATSIAR            | 738  | 20 | 6  | 43.53  | b5b9b14b15°b15b16                                                        | 2058.06 | 96.249  | 4136   | 3 | 686.69  | -13.52 |
| IP18206 VINC_HUMAN Vinculin   | 76 | Oxidation+M(4)        | LEAMTNSK                        | 373  | 8  | 4  | 34.82  | b3y3y6°y6                                                                | 909.44  | 118.272 | 2036   | 1 | 909.44  | 5.44   |
| IP18206 VINC_HUMAN Vinculin   | 77 | Oxidation+M(20)       | VLQLTSWDEDAWASKDTEAMK           | 246  | 21 | 4  | 26.21  | b10b12y9y10                                                              | 2440.17 | 120.515 | 1679   | 2 | 1220.59 | 13.91  |
| IP18206 VINC_HUMAN Vinculin   | 78 |                       | AQQVSQGLD                       | 352  | 9  | 0  | 4.05   |                                                                          | 945.46  | 57.233  | 5029   | 2 | 473.23  | -6.39  |
| IP18206 VINC_HUMAN Vinculin   | 79 |                       | PDLTAPVAAVQAAVSNLVR             | 37   | 19 | 11 | 67.85  | b4°b4b5°b5b7°b7b8°b8b9b<br>10b13                                         | 1892.04 | 117.264 | 3406   | 3 | 631.35  | -11.81 |
| IP18206 VINC_HUMAN Vinculin   | 80 |                       | PYSVPAAR                        | 98   | 7  | 0  | 5.85   |                                                                          | 789.42  | 65.146  | 1938   | 2 | 395.21  | -8.04  |
| IP18206 VINC_HUMAN Vinculin   | 81 |                       | ELLPVLISAMK                     | 199  | 11 | 0  | 2.7    |                                                                          | 1195.70 | 90.517  | 4635   | 2 | 598.35  | -5.92  |
| IP08567 PLEK_HUMAN Pleckstrin | 1  |                       | EDPAYLHYDPAAGEDPLGAIHLR         | 269  | 24 | 25 | 175.72 | b2°b2b7°b7b8b10°b10b12b<br>14b15y1y2y3y4y5y6y7y8y<br>9y10y12y14y18y22y24 | 2683.25 | 78.635  | 495235 | 4 | 671.57  | -12.10 |

|                                               |    |                                                |                                |     |    |    |        |                                                                                                                                             |         |         |        |   |         |        |
|-----------------------------------------------|----|------------------------------------------------|--------------------------------|-----|----|----|--------|---------------------------------------------------------------------------------------------------------------------------------------------|---------|---------|--------|---|---------|--------|
| P08567 PLEK_HUMAN Pleckstrin                  | 2  |                                                | SEEEENLFEIITADEVHYFLQAATPK     | 308 | 25 | 43 | 344.68 | b2°b2b3°b3b4b5°b5*b5b6°<br>b6*b6b7*b7b9b10*b10b11<br>b12y2y3y4°y4y5y6y7y8y10<br>y11y12y13°y13y14y15y16y<br>18°y18y19y20y21y22y23y2<br>5*y25 | 2894.40 | 121.199 | 283927 | 3 | 965.47  | -2.53  |
| P08567 PLEK_HUMAN Pleckstrin                  | 3  |                                                | QQDHFFQAAFLEER                 | 75  | 14 | 15 | 131.51 | b14y2y3°y3y4y5y6y7y8y9y<br>10y11y12*y12y14                                                                                                  | 1765.82 | 71.004  | 123234 | 3 | 589.28  | -7.54  |
| P08567 PLEK_HUMAN Pleckstrin                  | 4  |                                                | QEGLMIASSLLNEGYLQPAGDMS<br>K   | 174 | 24 | 25 | 115.86 | b4°b4b5°b5*b5b6*b6b13*<br>b13b14b17y1y2y3y4y7°y7y<br>10*y10y11y12y13y15*y15<br>y24                                                          | 2552.23 | 90.472  | 81058  | 3 | 851.42  | -2.20  |
| P08567 PLEK_HUMAN Pleckstrin                  | 5  | Carbamidomethyl+C(5);<br>Carbamidomethyl+C(10) | IFNHCFGTGNCVIDWLVSNQSVR        | 150 | 22 | 6  | 27.36  | b5b8y5*y5y6y8                                                                                                                               | 2666.26 | 92.072  | 67024  | 3 | 889.43  | 0.73   |
| P08567 PLEK_HUMAN Pleckstrin                  | 6  | Carbamidomethyl+C(8)                           | GSTLTSPCQDFGKR                 | 51  | 14 | 13 | 96.51  | b6b12y1y2y3y4y7°y7y8y9y<br>10y11y14                                                                                                         | 1553.75 | 40.618  | 30037  | 2 | 777.38  | 5.58   |
| P08567 PLEK_HUMAN Pleckstrin                  | 7  | Carbamidomethyl+C(2)                           | GCVVTSVESNSNGRK                | 293 | 15 | 12 | 103.65 | b2b3b4y6y7y8*y8y9y10y1<br>1y12y15                                                                                                           | 1593.75 | 28.301  | 19969  | 3 | 531.92  | -9.96  |
| P08567 PLEK_HUMAN Pleckstrin                  | 8  | Carbamidomethyl+C(8)                           | GSTLTSPCQDFGK                  | 51  | 13 | 8  | 39.34  | b5°b5b8°b8y4y5y10*y10                                                                                                                       | 1397.64 | 28.784  | 46959  | 2 | 699.32  | 1.05   |
| P08567 PLEK_HUMAN Pleckstrin                  | 9  |                                                | LPETIDLGALYLSMK                | 119 | 15 | 3  | 23.19  | b3b4y10                                                                                                                                     | 1663.88 | 91.354  | 10632  | 3 | 555.30  | -8.29  |
| P08567 PLEK_HUMAN Pleckstrin                  | 10 | Carbamidomethyl+C(2)                           | GCVVTSVESNSNGR                 | 293 | 14 | 9  | 48.85  | b3b4b6°b6y5y7°y7y11°y11                                                                                                                     | 1465.69 | 71.030  | 3426   | 3 | 489.24  | 16.49  |
| P08567 PLEK_HUMAN Pleckstrin                  | 11 |                                                | NRQEGLMIASSLLNEGYLQPAGD<br>MSK | 172 | 26 | 10 | 65.28  | b7b12b19y3y5y9y11y13y1<br>4y15                                                                                                              | 2822.38 | 85.426  | 83671  | 3 | 941.47  | -0.17  |
| P08567 PLEK_HUMAN Pleckstrin                  | 12 |                                                | LPETIDLGALYLSMKDTEK            | 119 | 19 | 6  | 40.78  | y3y6°y6y8y9y18                                                                                                                              | 2137.10 | 87.625  | 18226  | 3 | 713.04  | -5.26  |
| P08567 PLEK_HUMAN Pleckstrin                  | 13 | Carbamidomethyl+C(8)                           | GSTLTSPCQDFGKR                 | 51  | 14 | 6  | 57.97  | b5y4y8y9y10y11                                                                                                                              | 1553.74 | 58.554  | 4318   | 3 | 518.59  | 3.06   |
| P08567 PLEK_HUMAN Pleckstrin                  | 14 | Carbamidomethyl+C(1)                           | CIEGGQKFAR                     | 101 | 10 | 5  | 53.23  | b4°b4b5b8b9                                                                                                                                 | 1165.58 | 105.191 | 2975   | 1 | 1165.58 | -0.42  |
| P08567 PLEK_HUMAN Pleckstrin                  | 15 | Carbamidomethyl+C(6);<br>Carbamidomethyl+C(11) | KIFNHCFGTGNCVIDWLVSNQSVR       | 149 | 23 | 5  | 12.44  | b9°b9y11*y11y14                                                                                                                             | 2794.34 | 117.572 | 2639   | 3 | 932.12  | -6.64  |
| P08567 PLEK_HUMAN Pleckstrin                  | 16 | Carbamidomethyl+C(2)                           | GCVVTSVESNSNGRK                | 293 | 15 | 3  | 17.17  | b10y10y14                                                                                                                                   | 1593.75 | 58.632  | 2471   | 2 | 797.38  | -11.87 |
| P08567 PLEK_HUMAN Pleckstrin                  | 17 | Oxidation+M(10)                                | GSVFNTWKPMWVVLEDGIEFYK<br>K    | 14  | 24 | 4  | 21.44  | b5y9y10°y10                                                                                                                                 | 2902.47 | 108.961 | 82887  | 4 | 726.37  | -4.96  |
| P08567 PLEK_HUMAN Pleckstrin                  | 18 | Oxidation+M(5)                                 | QEGLMIASSLLNEGYLQPAGDMS<br>K   | 174 | 24 | 3  | 12.15  | b23y6y14                                                                                                                                    | 2568.21 | 100.840 | 3198   | 3 | 856.74  | -9.70  |
| P08567 PLEK_HUMAN Pleckstrin                  | 19 | Carbamidomethyl+C(4)                           | TSPCQDFGKR                     | 55  | 10 | 0  | 4.05   |                                                                                                                                             | 1195.57 | 40.616  | 9024   | 2 | 598.29  | 14.40  |
| P08567 PLEK_HUMAN Pleckstrin                  | 20 | Carbamidomethyl+C(6)                           | TLTSPCQDFGKR                   | 53  | 12 | 3  | 33.83  | b8b9b10                                                                                                                                     | 1409.70 | 40.657  | 2186   | 3 | 470.57  | 13.42  |
| P08567 PLEK_HUMAN Pleckstrin                  | 21 |                                                | VTSVESNSNGRK                   | 296 | 12 | 1  | 7.24   | b10                                                                                                                                         | 1277.63 | 28.307  | 1600   | 2 | 639.32  | -8.89  |
| P08567 PLEK_HUMAN Pleckstrin                  | 22 |                                                | EDPAYLHYYPAGAEDPLGAIHLR        | 269 | 24 | 0  | 8.54   |                                                                                                                                             | 2665.25 | 78.622  | 21435  | 4 | 667.07  | -6.87  |
| P08567 PLEK_HUMAN Pleckstrin                  | 23 |                                                | QQDHFFQAAFLEER                 | 75  | 14 | 0  | 4.05   |                                                                                                                                             | 1747.82 | 70.957  | 1555   | 3 | 583.28  | 5.94   |
| P68363 TBA1B_HUMAN Tubulin alpha-<br>1B chain | 1  |                                                | AVFVDLEPTVIDEVR                | 64  | 15 | 21 | 200.65 | b2b3b4b5b6b7y2y3°y3y4y<br>5y6y7y8y9°y9y10y11y12y1<br>3y15                                                                                   | 1701.90 | 83.503  | 292343 | 2 | 851.46  | -0.79  |
| P68363 TBA1B_HUMAN Tubulin alpha-<br>1B chain | 2  |                                                | VGINYQPPTVPPGGDLAK             | 352 | 18 | 16 | 67.07  | b4*b4b5*b5b6*b6b7*b7b1<br>1°b11y1y2y8y12y14y18                                                                                              | 1825.00 | 64.922  | 216139 | 2 | 913.00  | 5.55   |
| P68363 TBA1B_HUMAN Tubulin alpha-<br>1B chain | 3  |                                                | NLDIERPTYTNLNR                 | 215 | 14 | 16 | 60.05  | b2*b2b3°b3b5°b5b7y2y4*y<br>4y7y8y12*y12y14*y14                                                                                              | 1718.86 | 51.755  | 209644 | 3 | 573.63  | -11.43 |

|                                           |    |                       |                               |     |    |    |        |                                                         |         |         |        |   |         |        |
|-------------------------------------------|----|-----------------------|-------------------------------|-----|----|----|--------|---------------------------------------------------------|---------|---------|--------|---|---------|--------|
| P68363 TBA1B_HUMAN Tubulin alpha-1B chain | 4  |                       | QLFHPEQLITGKEDAANNYAR         | 84  | 21 | 11 | 53.17  | b6*b6y2y3y5y6y7y9y12y21*y21                             | 2415.17 | 61.209  | 194281 | 4 | 604.55  | -13.34 |
| P68363 TBA1B_HUMAN Tubulin alpha-1B chain | 5  | Carbamidomethyl+C(8)  | SIQFVDWCPTGFK                 | 339 | 13 | 19 | 191.78 | b3b4b5*b5b6b9b11*b11b12y2y3y4y5y6y7y9y10y12y13          | 1584.75 | 81.861  | 128587 | 2 | 792.88  | 1.54   |
| P68363 TBA1B_HUMAN Tubulin alpha-1B chain | 6  |                       | EIIDLVDR                      | 112 | 9  | 9  | 59.51  | b2b4y1y2y3y4y5y6y9                                      | 1085.62 | 78.680  | 87204  | 2 | 543.31  | -3.94  |
| P68363 TBA1B_HUMAN Tubulin alpha-1B chain | 7  | Carbamidomethyl+C(3)  | AVCMLSNTTAAIEAWAR             | 373 | 17 | 7  | 37.33  | b8y4y8y11*y11*y11y16                                    | 1864.91 | 83.137  | 85045  | 2 | 932.96  | 3.34   |
| P68363 TBA1B_HUMAN Tubulin alpha-1B chain | 8  |                       | DVNAAIATIK                    | 326 | 10 | 6  | 37.67  | b3b8y1y6y8y10                                           | 1015.57 | 51.251  | 84912  | 2 | 508.29  | -4.69  |
| P68363 TBA1B_HUMAN Tubulin alpha-1B chain | 9  | Carbamidomethyl+C(15) | AYHEQLSVAEITNACFEPANQMVK      | 280 | 24 | 7  | 32.35  | b10b11b14y1y7y11y13                                     | 2750.30 | 72.595  | 73730  | 3 | 917.44  | 4.79   |
| P68363 TBA1B_HUMAN Tubulin alpha-1B chain | 10 |                       | FDGALNVDLTFEQTNLVPYPR         | 243 | 21 | 11 | 54.9   | b2b3b4b16b17b21y2y4y5y11y21                             | 2409.22 | 93.917  | 46804  | 2 | 1205.11 | 3.75   |
| P68363 TBA1B_HUMAN Tubulin alpha-1B chain | 11 |                       | LISQIVSSITASLR                | 229 | 14 | 5  | 18.27  | b5*b5y4y8y14                                            | 1487.88 | 99.046  | 34411  | 2 | 744.44  | 1.80   |
| P68363 TBA1B_HUMAN Tubulin alpha-1B chain | 12 |                       | LSVDYGGK                      | 156 | 8  | 5  | 39.59  | b2y4y5y7y8                                              | 909.50  | 28.259  | 28744  | 2 | 455.25  | -6.64  |
| P68363 TBA1B_HUMAN Tubulin alpha-1B chain | 13 |                       | AFVHWYVGEEMEEGFSEAREDMAALEK   | 402 | 28 | 4  | 16.47  | b3b7b14y10                                              | 3217.46 | 93.270  | 3832   | 3 | 1073.16 | 10.78  |
| P02042 HBD_HUMAN Hemoglobin subunit delta | 1  |                       | LLVVYPWTQR                    | 31  | 10 | 19 | 112.19 | b2b3b4b5y1y2*y2y3*y3y4*y4y5*y5*y5y6y7y8y10*y10          | 1274.71 | 78.013  | 611373 | 2 | 637.86  | -10.15 |
| P02042 HBD_HUMAN Hemoglobin subunit delta | 2  |                       | VLGAFSDGLAHLNLDNK             | 67  | 16 | 17 | 131.73 | b2b3y1y2y3y4y5y6y7y9y11y12*y12*y12y13y14y16             | 1669.87 | 75.882  | 357979 | 3 | 557.29  | -14.62 |
| P02042 HBD_HUMAN Hemoglobin subunit delta | 3  |                       | VVAGVANALAHK                  | 133 | 12 | 13 | 105.12 | b2y2y3y4y5y6*y6y7*y7y8y9y10y12                          | 1149.67 | 41.357  | 144853 | 2 | 575.34  | -1.81  |
| P02042 HBD_HUMAN Hemoglobin subunit delta | 4  | Carbamidomethyl+C(11) | GTFSQLSELHCDK                 | 83  | 13 | 7  | 19.58  | b10*b10y1y2y4y8y13                                      | 1521.71 | 64.870  | 48179  | 2 | 761.36  | 7.86   |
| P02042 HBD_HUMAN Hemoglobin subunit delta | 5  |                       | TAVNALWGK                     | 9   | 9  | 4  | 29.25  | b5*b5b6y3                                               | 959.55  | 43.591  | 41344  | 2 | 480.28  | 17.81  |
| P02042 HBD_HUMAN Hemoglobin subunit delta | 6  |                       | VHLTPEEK                      | 1   | 8  | 3  | 31.81  | b3b4y6                                                  | 952.50  | 24.420  | 39121  | 2 | 476.76  | -5.83  |
| P02042 HBD_HUMAN Hemoglobin subunit delta | 7  |                       | VNVDAVGGEALGR                 | 18  | 13 | 3  | 24.35  | b10y6y7                                                 | 1256.66 | 49.250  | 14572  | 2 | 628.83  | 1.07   |
| P02042 HBD_HUMAN Hemoglobin subunit delta | 8  |                       | FFESFGDLSSPDAVMGNPK           | 41  | 19 | 3  | 14.15  | b6y12y16                                                | 2044.95 | 80.530  | 13140  | 2 | 1022.98 | 9.79   |
| P02042 HBD_HUMAN Hemoglobin subunit delta | 9  |                       | EFTPQMQAAYQK                  | 121 | 12 | 3  | 25.15  | b4y9y10                                                 | 1441.68 | 46.561  | 7660   | 2 | 721.34  | 1.78   |
| P02042 HBD_HUMAN Hemoglobin subunit delta | 10 |                       | LHVDPENFR                     | 96  | 9  | 4  | 29.25  | b8y6y8*y8                                               | 1126.57 | 99.008  | 5899   | 1 | 1126.57 | 4.88   |
| P02042 HBD_HUMAN Hemoglobin subunit delta | 11 | Carbamidomethyl+C(27) | VLGAFSDGLAHLNLDKGTFSQLSELHCDK | 67  | 29 | 3  | 35.61  | y3y4y5                                                  | 3172.54 | 110.768 | 56526  | 4 | 793.89  | -9.39  |
| P02042 HBD_HUMAN Hemoglobin subunit delta | 12 |                       | VVAGVANALAHKYH                | 133 | 14 | 8  | 77.71  | b3y3y4y5y7y9*y9y11                                      | 1449.80 | 44.884  | 50361  | 2 | 725.41  | 4.80   |
| P02042 HBD_HUMAN Hemoglobin subunit delta | 13 |                       | NFGKEFTPQMQAAYQK              | 117 | 16 | 7  | 52.64  | b3b6b12y11*y11y12y13                                    | 1887.90 | 53.798  | 3453   | 2 | 944.45  | -5.04  |
| P07996 TSP1_HUMAN Thrombospondin-1        | 1  |                       | FVFGTTPEDILR                  | 216 | 12 | 14 | 96.67  | b2b5*b5b12y1y3y4y6y7y8y9y10*y10y12                      | 1394.72 | 81.870  | 334897 | 2 | 697.87  | -6.04  |
| P07996 TSP1_HUMAN Thrombospondin-1        | 2  |                       | TIVTTLQDSIR                   | 288 | 11 | 10 | 97.68  | b2b3b5y3y4y5y7y8y9y11                                   | 1246.70 | 67.227  | 225224 | 2 | 623.85  | -0.88  |
| P07996 TSP1_HUMAN Thrombospondin-1        | 3  |                       | MENAELDVPIQSVFTR              | 173 | 16 | 15 | 116.32 | b2b3b4b6b7b8*b8b14y3y4y5y8y10y11y16                     | 1848.91 | 81.066  | 196988 | 2 | 924.96  | -2.31  |
| P07996 TSP1_HUMAN Thrombospondin-1        | 4  |                       | GGVNDNFQGVLQNVNR              | 201 | 15 | 21 | 162.15 | b3b5b7*b7b11b12y2y3*y3y4*y4y5y7y8y9y10*y10y11y13y15*y15 | 1616.82 | 65.533  | 187824 | 2 | 808.91  | 2.57   |

|                                    |    |                                                                          |                            |      |    |    |        |                                                                                       |         |         |        |   |         |        |
|------------------------------------|----|--------------------------------------------------------------------------|----------------------------|------|----|----|--------|---------------------------------------------------------------------------------------|---------|---------|--------|---|---------|--------|
| P07996 TSP1_HUMAN Thrombospondin-1 | 5  |                                                                          | NALWHTGNTPGQVR             | 1077 | 14 | 7  | 43.27  | y2y4y5*y5y9y10y14                                                                     | 1550.77 | 44.548  | 178142 | 3 | 517.60  | -5.98  |
| P07996 TSP1_HUMAN Thrombospondin-1 | 6  |                                                                          | FTGSQPFQGGVEHATANK         | 623  | 18 | 25 | 143.35 | b4*b4b5*b5b13y2*y2y3y4y5y6*y6y7y9*y9y10*y10*y10y11*y11y12y13*y13*y13y18               | 1875.88 | 44.004  | 177190 | 3 | 625.97  | -7.35  |
| P07996 TSP1_HUMAN Thrombospondin-1 | 7  |                                                                          | GTSQNDPNWVVR               | 968  | 12 | 14 | 101.84 | b6*b6b10*b10b11y2y3y4y6y7y8y10*y10y12                                                 | 1372.67 | 46.671  | 156817 | 2 | 686.84  | 6.14   |
| P07996 TSP1_HUMAN Thrombospondin-1 | 8  |                                                                          | AQGYSGLSVK                 | 1054 | 10 | 10 | 78.73  | b2*b2y2y3y4y5y6y7y8y10                                                                | 1009.53 | 38.081  | 145984 | 2 | 505.27  | -3.39  |
| P07996 TSP1_HUMAN Thrombospondin-1 | 9  |                                                                          | GPDPSSPAFR                 | 50   | 10 | 10 | 71.74  | b2b3*b3y3y4y6*y6y7y8y10                                                               | 1030.49 | 35.164  | 145259 | 2 | 515.75  | -4.62  |
| P07996 TSP1_HUMAN Thrombospondin-1 | 10 |                                                                          | FQMIPLDPK                  | 959  | 9  | 6  | 43.24  | b2*b2b3b7y5y7                                                                         | 1088.58 | 69.124  | 135416 | 2 | 544.79  | -3.36  |
| P07996 TSP1_HUMAN Thrombospondin-1 | 11 | Carbamidomethyl+C(5)                                                     | RPPLCYHNGVQYR              | 313  | 13 | 13 | 85.57  | b4b5b6b8*b8y1y3y4*y4y5*y5y6y13                                                        | 1659.80 | 35.426  | 126618 | 3 | 553.94  | -8.02  |
| P07996 TSP1_HUMAN Thrombospondin-1 | 12 | Carbamidomethyl+C(2);<br>Carbamidomethyl+C(14)                           | LCNSPSPQMNGKPCGEAR         | 460  | 19 | 30 | 222.91 | b2b3b4*b4b8b10*b10b11b19y2y4y5y6y7y8y9y10*y10*y10y11*y11*y11y12*y12y13y15y16y17y18y19 | 2131.93 | 30.392  | 95930  | 3 | 711.31  | -2.63  |
| P07996 TSP1_HUMAN Thrombospondin-1 | 13 | Carbamidomethyl+C(3)                                                     | DNCQYVYNVDQR               | 810  | 12 | 5  | 34.4   | y2*y2y6y7y8                                                                           | 1573.68 | 43.208  | 88717  | 2 | 787.34  | 4.50   |
| P07996 TSP1_HUMAN Thrombospondin-1 | 14 |                                                                          | GFLLLASLR                  | 86   | 9  | 8  | 59.51  | b2b3y2y4y5y6y7y9                                                                      | 989.61  | 89.481  | 63515  | 2 | 495.31  | -8.63  |
| P07996 TSP1_HUMAN Thrombospondin-1 | 15 | Carbamidomethyl+C(1);<br>Carbamidomethyl+C(10);<br>Carbamidomethyl+C(13) | CENTDPGYNCLPCPPR           | 607  | 16 | 8  | 26.94  | b2b11y1y2y5y11y12y16                                                                  | 1949.81 | 49.426  | 57910  | 2 | 975.41  | 9.33   |
| P07996 TSP1_HUMAN Thrombospondin-1 | 16 | Carbamidomethyl+C(6);<br>Carbamidomethyl+C(10)                           | DLQAICGISCELSSMVLELR       | 264  | 21 | 12 | 87.42  | b12b14y3*y3y4y5y6y8y11y12y13y21                                                       | 2409.14 | 101.462 | 56837  | 3 | 803.72  | -2.63  |
| P07996 TSP1_HUMAN Thrombospondin-1 | 17 |                                                                          | IPESGGDNSVDFIFELTGAAR      | 20   | 21 | 7  | 43.44  | b5y3y4y5y7y16y21                                                                      | 2195.08 | 98.830  | 51866  | 2 | 1098.04 | 7.56   |
| P07996 TSP1_HUMAN Thrombospondin-1 | 18 |                                                                          | TIVTTLQDSIRK               | 288  | 12 | 7  | 31.39  | b2y2y4y6*y6y9y12                                                                      | 1374.78 | 59.664  | 44095  | 3 | 458.93  | -13.67 |
| P07996 TSP1_HUMAN Thrombospondin-1 | 19 |                                                                          | VTEENKELANELR              | 300  | 13 | 9  | 19.58  | b2*b2b3*b3y2y4*y4y6y13                                                                | 1544.78 | 40.829  | 39272  | 3 | 515.60  | -4.27  |
| P07996 TSP1_HUMAN Thrombospondin-1 | 20 |                                                                          | GTLALER                    | 101  | 8  | 5  | 39.59  | y1y3y4y5y8                                                                            | 872.52  | 55.906  | 38047  | 2 | 436.76  | -3.57  |
| P07996 TSP1_HUMAN Thrombospondin-1 | 21 | Carbamidomethyl+C(2)                                                     | LCNNPTPQFGGK               | 517  | 12 | 13 | 71.58  | b2b3b6*b6b9y1y2y3y4y6*y6y10y12                                                        | 1332.65 | 38.850  | 34086  | 2 | 666.83  | 6.41   |
| P07996 TSP1_HUMAN Thrombospondin-1 | 22 |                                                                          | QVTQSYWDTNPTR              | 1041 | 13 | 9  | 65.02  | b3*b3y4*y4y5y7y9y11y13                                                                | 1595.75 | 48.520  | 28392  | 2 | 798.38  | 3.75   |
| P07996 TSP1_HUMAN Thrombospondin-1 | 23 | Carbamidomethyl+C(2);<br>Carbamidomethyl+C(14);<br>Carbamidomethyl+C(24) | LCNNPTPQFGGKDCVGDVTENQICNK | 517  | 26 | 15 | 33.95  | b2b4b10*b10*b10b12*b12b15*b15y7y11*y11*y11y13y26                                      | 2965.33 | 51.918  | 21373  | 3 | 989.12  | 2.63   |
| P07996 TSP1_HUMAN Thrombospondin-1 | 24 | Carbamidomethyl+C(2);<br>Carbamidomethyl+C(12)                           | DCVGDVTENQICNK             | 529  | 14 | 3  | 18.27  | b10y9y12                                                                              | 1651.71 | 40.705  | 15664  | 2 | 826.36  | 5.03   |
| P07996 TSP1_HUMAN Thrombospondin-1 | 25 |                                                                          | IPESGGDNSVDFIFELTGAARK     | 20   | 22 | 4  | 19.3   | b3b5*b5b13                                                                            | 2323.14 | 94.349  | 1559   | 3 | 775.05  | -8.30  |
| P07996 TSP1_HUMAN Thrombospondin-1 | 26 | Carbamidomethyl+C(1)                                                     | CNYLGHYSDPMYR              | 662  | 13 | 3  | 27.06  | y4y6y7                                                                                | 1675.69 | 52.751  | 97918  | 3 | 559.23  | -6.41  |
| P07996 TSP1_HUMAN Thrombospondin-1 | 27 | Carbamidomethyl+C(11);<br>Carbamidomethyl+C(14)                          | DTDMDGVGDQCNCLEHNPDLSDSDR  | 822  | 29 | 7  | 34.08  | b3b15y3y5y10y15y22                                                                    | 3320.28 | 51.663  | 87738  | 3 | 1107.43 | 5.96   |

|                                    |    |                                                                                                       |                                           |      |    |    |        |                                                               |         |         |        |   |         |        |
|------------------------------------|----|-------------------------------------------------------------------------------------------------------|-------------------------------------------|------|----|----|--------|---------------------------------------------------------------|---------|---------|--------|---|---------|--------|
| P07996 TSP1_HUMAN Thrombospondin-1 | 28 |                                                                                                       | LVPNPDQK                                  | 911  | 8  | 4  | 39.59  | y3y4*y4y6                                                     | 910.50  | 26.998  | 29704  | 2 | 455.75  | -4.36  |
| P07996 TSP1_HUMAN Thrombospondin-1 | 29 |                                                                                                       | FYVVMWK                                   | 1034 | 7  | 3  | 36.13  | b3y4y5                                                        | 972.50  | 76.028  | 24494  | 2 | 486.76  | 1.51   |
| P07996 TSP1_HUMAN Thrombospondin-1 | 30 | Carbamidomethyl+C(1);<br>Carbamidomethyl+C(4);<br>Carbamidomethyl+C(24)                               | CDNCPYNNHPDQADTDNNGEGD<br>ACAADIDGDGILNER | 773  | 37 | 4  | 10.9   | b4y4y11*y11                                                   | 4092.63 | 56.781  | 16888  | 3 | 1364.88 | 8.59   |
| P07996 TSP1_HUMAN Thrombospondin-1 | 31 | Carbamidomethyl+C(5);<br>Carbamidomethyl+C(23)                                                        | IGDTCDDNQDIDEDGHQNNLDNC<br>PYVVPANQADHDK  | 851  | 36 | 8  | 39.93  | b3b4*b4y3y5y8y10y11                                           | 4125.69 | 45.442  | 7525   | 4 | 1032.18 | 2.01   |
| P07996 TSP1_HUMAN Thrombospondin-1 | 32 |                                                                                                       | SITLHVQEDR                                | 154  | 10 | 3  | 32.71  | y3y7y8                                                        | 1207.61 | 57.821  | 4520   | 2 | 604.31  | -20.52 |
| P07996 TSP1_HUMAN Thrombospondin-1 | 33 | Carbamidomethyl+C(3);<br>Carbamidomethyl+C(8);<br>Carbamidomethyl+C(18)<br>;Carbamidomethyl+C(19<br>) | VSCPIMPCSNATVPDGECCPR                     | 350  | 21 | 5  | 21.63  | b6*b6b7*b7y12                                                 | 2406.95 | 25.376  | 2570   | 4 | 602.49  | -20.59 |
| P07996 TSP1_HUMAN Thrombospondin-1 | 34 |                                                                                                       | IMADSGPIYDK                               | 1130 | 11 | 7  | 91.92  | b3b4b6b7b9b10y7                                               | 1209.59 | 31.048  | 2459   | 2 | 605.30  | 4.04   |
| P07996 TSP1_HUMAN Thrombospondin-1 | 35 | Carbamidomethyl+C(3);<br>Carbamidomethyl+C(10)                                                        | NPCTDGTDCNK                               | 647  | 12 | 4  | 28.38  | b3b5*b5b6                                                     | 1418.54 | 16.216  | 2214   | 3 | 473.52  | -4.30  |
| P07996 TSP1_HUMAN Thrombospondin-1 | 36 | Carbamidomethyl+C(16)                                                                                 | MGLAWGLGVFLMHVCGTNR                       | 0    | 20 | 4  | 13.63  | b7y7*y7y13                                                    | 2232.08 | 105.358 | 2200   | 2 | 1116.54 | -21.66 |
| P07996 TSP1_HUMAN Thrombospondin-1 | 37 | Carbamidomethyl+C(6)                                                                                  | EVPDACFNHNGEHR                            | 593  | 14 | 3  | 18.27  | b9y7y9                                                        | 1681.74 | 41.816  | 1732   | 2 | 841.38  | 17.71  |
| P07996 TSP1_HUMAN Thrombospondin-1 | 38 |                                                                                                       | IEDANLIPPVDDKFQDLVDAVR                    | 60   | 23 | 21 | 158.94 | b4b5*b5b6*b6b7*b7b14y3<br>y4y5y6y7*y7y9*y9y11y13y<br>15y16y17 | 2579.33 | 87.746  | 345459 | 3 | 860.45  | -3.50  |
| P07996 TSP1_HUMAN Thrombospondin-1 | 39 | Carbamidomethyl+C(21)                                                                                 | FTGSQPFQGVHATANKQVCKP<br>R                | 623  | 24 | 9  | 92.05  | y4y5y6y8y9y11y12y18y19                                        | 2644.29 | 40.370  | 87915  | 5 | 529.66  | -5.26  |
| P07996 TSP1_HUMAN Thrombospondin-1 | 40 | Carbamidomethyl+C(4);<br>Carbamidomethyl+C(19)<br>;Carbamidomethyl+C(23<br>)                          | KDACPINGGWGPSPWDICSVTC<br>GGGVQK          | 485  | 29 | 3  | 11.2   | b15y7y12                                                      | 3189.47 | 88.461  | 80212  | 3 | 1063.83 | 10.87  |
| P07996 TSP1_HUMAN Thrombospondin-1 | 41 | Carbamidomethyl+C(4);<br>Carbamidomethyl+C(16)                                                        | IRLCNSPSPQMNGKPCGEAR                      | 458  | 21 | 18 | 115.78 | b4b5*b5b6*b6*b6b7*b7b1<br>0*b10y6y7y8y9*y9y10y11*<br>y11      | 2401.09 | 37.220  | 79820  | 4 | 601.03  | -12.51 |
| P07996 TSP1_HUMAN Thrombospondin-1 | 42 |                                                                                                       | VTEENKELANELR                             | 300  | 13 | 5  | 19.58  | b3b12y4*y4*y4                                                 | 1544.79 | 90.332  | 74792  | 2 | 772.90  | -4.11  |
| P07996 TSP1_HUMAN Thrombospondin-1 | 43 |                                                                                                       | LVKGPDPSSPAFR                             | 47   | 13 | 4  | 32.54  | b6y4y7y10                                                     | 1370.74 | 41.083  | 21531  | 3 | 457.58  | -3.56  |
| P07996 TSP1_HUMAN Thrombospondin-1 | 44 |                                                                                                       | IMADSGPIYDKTYAGGR                         | 1130 | 17 | 6  | 46.61  | b10y4y6y7y9y15                                                | 1814.87 | 46.545  | 17519  | 3 | 605.63  | -3.83  |
| P07996 TSP1_HUMAN Thrombospondin-1 | 45 |                                                                                                       | FYVVMWKQVTQSYWDTNPTR                      | 1034 | 20 | 6  | 36.69  | b6b8y3y5y8y12                                                 | 2549.24 | 98.860  | 13533  | 3 | 850.42  | 5.65   |
| P07996 TSP1_HUMAN Thrombospondin-1 | 46 | Carbamidomethyl+C(4)                                                                                  | SRLCNPPTQFGGK                             | 515  | 14 | 5  | 29.26  | b6*b6y3y4y6                                                   | 1575.75 | 36.528  | 13044  | 3 | 525.92  | -12.63 |
| P07996 TSP1_HUMAN Thrombospondin-1 | 47 |                                                                                                       | KIMADSGPIYDK                              | 1129 | 12 | 5  | 35.68  | b5b7b10*b10y4                                                 | 1337.66 | 48.405  | 11566  | 2 | 669.33  | -11.59 |
| P07996 TSP1_HUMAN Thrombospondin-1 | 48 | Carbamidomethyl+C(8);<br>Carbamidomethyl+C(12)                                                        | TKDLQAICGISDELSSMVLELR                    | 262  | 23 | 3  | 12.44  | b5b9y4                                                        | 2638.30 | 91.282  | 10237  | 3 | 880.11  | 4.53   |

|                                                     |    |                                                                                                                             |                                          |      |    |    |        |                                                 |         |         |        |   |         |        |
|-----------------------------------------------------|----|-----------------------------------------------------------------------------------------------------------------------------|------------------------------------------|------|----|----|--------|-------------------------------------------------|---------|---------|--------|---|---------|--------|
| P07996 TSP1_HUMAN Thrombospondin-1                  | 49 | Carbamidomethyl+C(1);<br>Carbamidomethyl+C(4);<br>Carbamidomethyl+C(15);<br>Carbamidomethyl+C(21);<br>Carbamidomethyl+C(28) | CGACPPGYSGNGIQCTDVDECKE<br>VPDACFNHNGEHR | 571  | 36 | 4  | 12.16  | b3b14y10y12                                     | 4107.66 | 48.147  | 4270   | 4 | 1027.67 | 2.38   |
| P07996 TSP1_HUMAN Thrombospondin-1                  | 50 | Carbamidomethyl+C(2);<br>Carbamidomethyl+C(14);<br>Carbamidomethyl+C(24)                                                    | LCNNPTPQFGGKDCVGDVTENQI<br>CNK           | 517  | 26 | 3  | 11.67  | b9b12y13                                        | 2965.30 | 55.954  | 2279   | 4 | 742.08  | -8.48  |
| P07996 TSP1_HUMAN Thrombospondin-1                  | 51 |                                                                                                                             | LVPNPDQKDSGDGDR                          | 911  | 15 | 6  | 30.38  | b7b10y10*y10*y10y11                             | 1612.76 | 31.176  | 2160   | 2 | 806.88  | 3.03   |
| P07996 TSP1_HUMAN Thrombospondin-1                  | 52 | Phosphoryl STY(4)                                                                                                           | VVNSTTGPEHLR                             | 1064 | 13 | 10 | 76.01  | b3*b3y5_H3PO4<br>y5y6y7*y7y8*y8y9y12            | 1446.68 | 136.421 | 3641   | 1 | 1446.68 | 14.18  |
| P07996 TSP1_HUMAN Thrombospondin-1                  | 53 | Phosphoryl STY(17)                                                                                                          | IPESGGDNSVFDIFELTGAARK                   | 20   | 22 | 3  | 12.79  | b15y6_H3PO4 y6y9                                | 2403.15 | 111.825 | 1642   | 2 | 1202.08 | 13.21  |
| P07996 TSP1_HUMAN Thrombospondin-1                  | 54 | Oxidation+M(3)                                                                                                              | VVMYEGK                                  | 1122 | 7  | 4  | 57.9   | b4b6y4y6                                        | 841.42  | 28.772  | 3871   | 2 | 421.21  | 10.08  |
| P07996 TSP1_HUMAN Thrombospondin-1                  | 55 | Carbamidomethyl+C(2);<br>Carbamidomethyl+C(14);<br>Oxidation+M(9)                                                           | LCNSPSPQMNGKPCGEAR                       | 460  | 19 | 6  | 61.31  | b3y4y5y6y7y8                                    | 2147.91 | 23.376  | 2888   | 3 | 716.64  | -6.71  |
| P07996 TSP1_HUMAN Thrombospondin-1                  | 56 |                                                                                                                             | LWHTGNTPGQVR                             | 1079 | 12 | 0  | 4.05   |                                                 | 1365.70 | 44.582  | 7279   | 2 | 683.36  | 0.80   |
| P07996 TSP1_HUMAN Thrombospondin-1                  | 57 |                                                                                                                             | LLLASLR                                  | 88   | 7  | 1  | 8.52   | b3                                              | 785.52  | 89.482  | 1624   | 2 | 393.26  | -5.05  |
| P07996 TSP1_HUMAN Thrombospondin-1                  | 58 |                                                                                                                             | GTLALER                                  | 101  | 8  | 0  | 1.35   |                                                 | 854.51  | 55.910  | 7250   | 2 | 427.76  | 0.57   |
| P04075 ALDOA_HUMAN Fructose-bisphosphate aldolase A | 1  |                                                                                                                             | IGEHTPSALAIMENANVLAR                     | 153  | 20 | 18 | 108.57 | b5*b5b7b8b9b10b12*b12y1y2y3y5y6y7*y7y8y10y20    | 2107.08 | 79.974  | 126662 | 3 | 703.03  | -5.79  |
| P04075 ALDOA_HUMAN Fructose-bisphosphate aldolase A | 2  | Carbamidomethyl+C(5)                                                                                                        | YASICQQNGIVIVEPEILPDGDHDLKR              | 173  | 28 | 18 | 131.46 | b1b2b9b10b11*b11y3y5y7y8y9y10y11y13y14y15y17y28 | 3176.58 | 75.479  | 114136 | 4 | 794.90  | -6.69  |
| P04075 ALDOA_HUMAN Fructose-bisphosphate aldolase A | 3  | Carbamidomethyl+C(25)                                                                                                       | ALSDHHIYLEGTLKPNMVTPGHACTQK              | 215  | 28 | 10 | 36.48  | b5b8*b8b14b20y1y4y5y8*y8                        | 3131.54 | 61.460  | 88837  | 5 | 627.11  | -13.02 |
| P04075 ALDOA_HUMAN Fructose-bisphosphate aldolase A | 4  |                                                                                                                             | LQSIGTENTENRR                            | 43   | 14 | 14 | 54.77  | b2*b2y1y4*y4y8*y8y10*y10y12*y12y13*y13y14       | 1646.79 | 27.765  | 74315  | 3 | 549.60  | -11.49 |
| P04075 ALDOA_HUMAN Fructose-bisphosphate aldolase A | 5  |                                                                                                                             | GVVPLAGTNGETTQGLDGLSER                   | 111  | 23 | 8  | 39.96  | b3b6y3y6y7y17y20y23                             | 2272.17 | 64.331  | 56910  | 2 | 1136.59 | 10.42  |
| P04075 ALDOA_HUMAN Fructose-bisphosphate aldolase A | 6  |                                                                                                                             | GILAADESTGSIK                            | 28   | 14 | 7  | 48.06  | b3b4b8y9y11y12y14                               | 1332.70 | 47.537  | 50545  | 2 | 666.86  | 3.11   |
| P04075 ALDOA_HUMAN Fructose-bisphosphate aldolase A | 7  |                                                                                                                             | YTPSGQAGAAASESLFVSNHAY                   | 342  | 22 | 7  | 24     | b5b7b9y9*y9y14y22                               | 2228.04 | 64.897  | 7069   | 2 | 1114.52 | 6.14   |
| P04075 ALDOA_HUMAN Fructose-bisphosphate aldolase A | 8  |                                                                                                                             | AAQEEYVKR                                | 322  | 9  | 7  | 52.78  | b2y2y3y4y5y6y9                                  | 1093.56 | 18.275  | 4549   | 2 | 547.28  | -6.36  |
| P04075 ALDOA_HUMAN Fructose-bisphosphate aldolase A | 9  | Carbamidomethyl+C(1)                                                                                                        | CPLLKPWALTFSYGR                          | 289  | 15 | 3  | 17.17  | b3y4y10                                         | 1808.96 | 66.141  | 3200   | 2 | 904.98  | 5.47   |
| P04075 ALDOA_HUMAN Fructose-bisphosphate aldolase A | 10 |                                                                                                                             | PYQYPALTPEQK                             | 1    | 12 | 3  | 25.15  | b3b4y8                                          | 1434.74 | 54.469  | 141609 | 3 | 478.92  | 10.12  |
| P04075 ALDOA_HUMAN Fructose-bisphosphate aldolase A | 11 |                                                                                                                             | QLLLTADDR                                | 60   | 9  | 3  | 37.03  | y5y7y8                                          | 1044.55 | 49.965  | 23544  | 2 | 522.78  | -13.44 |
| P04075 ALDOA_HUMAN Fructose-bisphosphate aldolase A | 12 |                                                                                                                             | MPYQYPALTPEQK                            | 0    | 13 | 6  | 43.53  | b3b6b8b9*b9y6                                   | 1565.76 | 31.916  | 17772  | 3 | 522.59  | -2.88  |
| P04075 ALDOA_HUMAN Fructose-bisphosphate aldolase A | 13 |                                                                                                                             | IVAPGK                                   | 22   | 6  | 1  | 13.2   | b5                                              | 584.38  | 41.810  | 17708  | 1 | 584.38  | 6.27   |



|                                                      |    |                                          |                              |     |    |    |        |                                                                            |         |         |        |   |         |        |
|------------------------------------------------------|----|------------------------------------------|------------------------------|-----|----|----|--------|----------------------------------------------------------------------------|---------|---------|--------|---|---------|--------|
| [P04075]ALDOA_HUMAN Fructose-bisphosphate aldolase A | 14 | Carbamidomethyl+C(8)                     | ALANSLACQ GK                 | 331 | 11 | 4  | 36.69  | b8b9y7y9                                                                   | 1132.59 | 44.087  | 4709   | 2 | 566.80  | 9.16   |
| [P04075]ALDOA_HUMAN Fructose-bisphosphate aldolase A | 15 |                                          | VDKGVVPLAGTNGETTTQGLDGLSER   | 108 | 26 | 7  | 51.02  | b4b5b6y5y8y12y14                                                           | 2614.32 | 60.012  | 43903  | 3 | 872.11  | -2.89  |
| [P04075]ALDOA_HUMAN Fructose-bisphosphate aldolase A | 16 |                                          | MPYQYPALTPEQKK               | 0   | 14 | 4  | 26.05  | b9b12°b12b13                                                               | 1693.86 | 118.334 | 14120  | 2 | 847.43  | -0.14  |
| [P04075]ALDOA_HUMAN Fructose-bisphosphate aldolase A | 17 |                                          | LQSIGTENTEENRR               | 43  | 14 | 6  | 48.27  | b3b11y4y5y10y13                                                            | 1646.79 | 45.924  | 3820   | 3 | 549.60  | -10.01 |
| [P04075]ALDOA_HUMAN Fructose-bisphosphate aldolase A | 18 | Carbamidomethyl+C(24)                    | GVVPLAGTNGETTTQGLDGLSERCAQYK | 111 | 28 | 3  | 11.33  | b3b12y7                                                                    | 2922.47 | 102.669 | 1991   | 3 | 974.83  | 13.87  |
| [P04075]ALDOA_HUMAN Fructose-bisphosphate aldolase A | 19 | Carbamidomethyl+C(1); Phosphoryl STY(10) | CPLLKPWALTFSYGR              | 289 | 15 | 3  | 17.17  | b3b11y4_H3PO4 y4                                                           | 1888.92 | 80.464  | 19556  | 3 | 630.31  | 7.11   |
| [P04075]ALDOA_HUMAN Fructose-bisphosphate aldolase A | 20 | Phosphoryl STY(6)                        | LQSIGTENTEENR                | 43  | 13 | 5  | 43.53  | b3b5b7_H3PO4 b7_HPO3 b7b8_H3PO4 b8y6                                       | 1570.67 | 27.134  | 3074   | 3 | 524.23  | 0.47   |
| [P04075]ALDOA_HUMAN Fructose-bisphosphate aldolase A | 21 | Phosphoryl STY(12)                       | GVVPLAGTNGETTTQGLDGLSER      | 111 | 23 | 7  | 42.16  | b4b12_H3PO4 b12b13b16y9y11y12_HPO3 y12                                     | 2352.13 | 68.733  | 1918   | 2 | 1176.57 | 14.84  |
| [P04075]ALDOA_HUMAN Fructose-bisphosphate aldolase A | 22 | Carbamidomethyl+C(25);Oxidation+M(18)    | ALSDHHIYLEGTLKPNMVTDPGHACTQK | 215 | 28 | 8  | 29.41  | b8°b8b9y3y12°y12y14*y14                                                    | 3147.60 | 105.296 | 1536   | 4 | 787.65  | 7.83   |
| [P04075]ALDOA_HUMAN Fructose-bisphosphate aldolase A | 23 |                                          | ASESLFVSNHAY                 | 352 | 12 | 1  | 8.09   | b3                                                                         | 1324.64 | 64.828  | 21337  | 3 | 442.22  | 13.73  |
| [P04075]ALDOA_HUMAN Fructose-bisphosphate aldolase A | 24 |                                          | SIGTENTEENRR                 | 45  | 12 | 1  | 7.25   | b11                                                                        | 1405.67 | 27.756  | 4673   | 2 | 703.34  | 4.43   |
| [P04075]ALDOA_HUMAN Fructose-bisphosphate aldolase A | 25 |                                          | PIVEPEILPDGDHDLKR            | 184 | 17 | 4  | 22.35  | b3b4b12°b12                                                                | 1943.03 | 75.471  | 3616   | 2 | 972.02  | 3.02   |
| [P04075]ALDOA_HUMAN Fructose-bisphosphate aldolase A | 26 |                                          | QEEYVKR                      | 324 | 7  | 0  | 1.8    |                                                                            | 951.49  | 18.275  | 2166   | 2 | 476.25  | -1.73  |
| [P04075]ALDOA_HUMAN Fructose-bisphosphate aldolase A | 27 |                                          | AQEEYVKR                     | 323 | 8  | 0  | 1.8    |                                                                            | 1022.52 | 18.274  | 2037   | 2 | 511.77  | -2.21  |
| [P04075]ALDOA_HUMAN Fructose-bisphosphate aldolase A | 28 |                                          | PDGDHDLKR                    | 192 | 9  | 0  | 10.34  |                                                                            | 1052.51 | 75.492  | 1890   | 2 | 526.76  | 1.97   |
| [P12814]ACTN1_HUMAN Alpha-actinin-1                  | 1  |                                          | VGWEQLLTIAR                  | 714 | 12 | 18 | 148.32 | b3b4b5°b5b6°b6b8y1y2y3y4y5y6°y6y7y8y9y12                                   | 1386.77 | 97.027  | 222796 | 2 | 693.89  | -1.06  |
| [P12814]ACTN1_HUMAN Alpha-actinin-1                  | 2  |                                          | AIMTYVSSFYHAFSGAQK           | 236 | 18 | 26 | 135.57 | b2b5°b5b13b15y1y2*y2y4*y4y5y6°y6y7y8y10°y10y11y12°y12*y12y13y16°y16*y16y18 | 2007.95 | 89.488  | 161074 | 3 | 669.99  | -7.23  |
| [P12814]ACTN1_HUMAN Alpha-actinin-1                  | 3  |                                          | LAILGIHNEVSK                 | 565 | 12 | 7  | 32.67  | b2b3y5*y5y9y10y12                                                          | 1293.73 | 57.493  | 156404 | 3 | 431.92  | -13.87 |
| [P12814]ACTN1_HUMAN Alpha-actinin-1                  | 4  |                                          | VLAVNQENEQLMEDYEK            | 264 | 17 | 14 | 94.07  | b2b3b4b12b13y2y4y6y9y10y12*y12y13y17                                       | 2051.97 | 60.848  | 154360 | 2 | 1026.49 | 6.66   |
| [P12814]ACTN1_HUMAN Alpha-actinin-1                  | 5  |                                          | MLDAEDIVGTARPDEK             | 220 | 16 | 8  | 54.78  | b14y4y11y12°y12y13y14y16                                                   | 1759.84 | 59.395  | 147767 | 3 | 587.28  | -9.43  |
| [P12814]ACTN1_HUMAN Alpha-actinin-1                  | 6  |                                          | VEQIAAIAQELNELDYDPSVNA R     | 450 | 25 | 27 | 167.1  | b2b3°b3b4b5b6°b6b7b13b14y2y3*y3y4*y4y5°y5y6*y6y7y8y10y12y14*y14y15y25      | 2808.39 | 93.609  | 138796 | 3 | 936.80  | 9.04   |
| [P12814]ACTN1_HUMAN Alpha-actinin-1                  | 7  |                                          | TINEVENQILTR                 | 726 | 12 | 12 | 72.83  | b2°b2b3b10°b10y1y3y4y5y6y10y12                                             | 1429.77 | 59.074  | 115237 | 2 | 715.39  | 4.95   |
| [P12814]ACTN1_HUMAN Alpha-actinin-1                  | 8  |                                          | LLETIDQLYLEYAKR              | 502 | 15 | 12 | 85.67  | b2b3y1y4y5y6y7y8y10*y10y13y15                                              | 1868.00 | 84.911  | 114637 | 3 | 623.34  | -8.43  |
| [P12814]ACTN1_HUMAN Alpha-actinin-1                  | 9  | Carbamidomethyl+C(2)                     | ICDQWDNLGALTQK               | 478 | 14 | 13 | 80.75  | b2b4b10y2y3y4y5y6y9y12°y12*y12y14                                          | 1661.79 | 69.134  | 107827 | 2 | 831.40  | -3.38  |

|                                    |    |                       |                                     |     |    |    |        |                                                 |         |         |         |   |         |        |
|------------------------------------|----|-----------------------|-------------------------------------|-----|----|----|--------|-------------------------------------------------|---------|---------|---------|---|---------|--------|
| P12814 ACTN1_HUMAN Alpha-actinin-1 | 10 |                       | LLETIDQLYLEYAK                      | 502 | 14 | 17 | 96.51  | b2b4°b4b6y2y3y4y5y6°y6y9°y9y10y11*y11y12°y14    | 1711.92 | 90.367  | 89876   | 2 | 856.46  | 0.57   |
| P12814 ACTN1_HUMAN Alpha-actinin-1 | 11 | Carbamidomethyl+C(11) | MVSDINNAWGCLEQVEK                   | 359 | 17 | 17 | 136.29 | b7°b7b8b13b16y5*y5y6y7y8y9y10*y10y11y12y15y17   | 1992.93 | 75.478  | 84178   | 2 | 996.97  | 6.80   |
| P12814 ACTN1_HUMAN Alpha-actinin-1 | 12 |                       | IDQLEGDHQLIQEALIFDNK                | 684 | 20 | 5  | 21.76  | b3y4*y4y5y20                                    | 2339.19 | 81.259  | 81017   | 3 | 780.40  | -1.04  |
| P12814 ACTN1_HUMAN Alpha-actinin-1 | 13 |                       | QFGAQANVIGPWQTK                     | 633 | 16 | 7  | 26.27  | b4b7*b7b11b16y7y16                              | 1757.93 | 75.256  | 77410   | 2 | 879.47  | -0.35  |
| P12814 ACTN1_HUMAN Alpha-actinin-1 | 14 |                       | LSNRPAFMPSEGR                       | 346 | 13 | 6  | 32.91  | b4b8y2y4y5y13                                   | 1461.72 | 44.359  | 77013   | 3 | 487.91  | -7.10  |
| P12814 ACTN1_HUMAN Alpha-actinin-1 | 15 |                       | AAPFNWMEGAMEDLQDTFIVHTIEIQGLTAEHQFK | 517 | 38 | 18 | 88.02  | b2b3b5b6*b6b8y2y3y4y5°y5y6y7y8*y8y10y36y38      | 4362.05 | 136.022 | 71258   | 4 | 1091.27 | 0.11   |
| P12814 ACTN1_HUMAN Alpha-actinin-1 | 16 |                       | IVQTYHVNMAGTNPYTTITPQEIN GK         | 577 | 26 | 8  | 46.96  | b3b10b13y7y8y10y11y26                           | 2890.44 | 63.478  | 48161   | 3 | 964.15  | -0.84  |
| P12814 ACTN1_HUMAN Alpha-actinin-1 | 17 | Carbamidomethyl+C(7)  | EGLLLWCQR                           | 147 | 9  | 5  | 43.75  | b8y3y5y6y9                                      | 1174.60 | 75.268  | 47346   | 2 | 587.80  | -1.87  |
| P12814 ACTN1_HUMAN Alpha-actinin-1 | 18 |                       | ATLPDADKER                          | 555 | 10 | 10 | 65.98  | b1y1y2y3y4y5y6y7°y7y10                          | 1115.57 | 24.427  | 35535   | 2 | 558.29  | -0.44  |
| P12814 ACTN1_HUMAN Alpha-actinin-1 | 19 |                       | HEAFESDLAAHQDR                      | 436 | 14 | 13 | 76.47  | b2b3°b3b5b8b10y4y9*y9y10*y10y12y14              | 1625.72 | 35.568  | 28234   | 3 | 542.58  | -5.03  |
| P12814 ACTN1_HUMAN Alpha-actinin-1 | 20 |                       | LMLLLEVISGER                        | 64  | 12 | 3  | 28.38  | y3y4y6                                          | 1372.78 | 105.908 | 4821    | 2 | 686.90  | -1.69  |
| P12814 ACTN1_HUMAN Alpha-actinin-1 | 21 |                       | GYEEWLLNEIR                         | 376 | 11 | 3  | 23.16  | b7b10y3                                         | 1421.70 | 86.438  | 4401    | 1 | 1421.70 | -5.75  |
| P12814 ACTN1_HUMAN Alpha-actinin-1 | 22 | Carbamidomethyl+C(11) | RELPPDQAEYCIAR                      | 849 | 14 | 4  | 18.27  | b2b9y5y9                                        | 1717.83 | 44.922  | 2129    | 2 | 859.42  | -2.42  |
| P12814 ACTN1_HUMAN Alpha-actinin-1 | 23 |                       | YLDIPK                              | 214 | 6  | 2  | 25.94  | b3y5                                            | 748.41  | 48.006  | 38953   | 2 | 374.71  | -12.72 |
| P12814 ACTN1_HUMAN Alpha-actinin-1 | 24 |                       | TAPYK                               | 157 | 5  | 1  | 12.75  | b4                                              | 579.32  | 58.726  | 24129   | 1 | 579.32  | 5.06   |
| P12814 ACTN1_HUMAN Alpha-actinin-1 | 25 |                       | NVNIQNFHISWK                        | 162 | 12 | 5  | 30.61  | b6b9y6°y6y8                                     | 1499.78 | 64.923  | 20579   | 3 | 500.60  | 0.33   |
| P12814 ACTN1_HUMAN Alpha-actinin-1 | 26 | Carbamidomethyl+C(2)  | ACLISLGYDIGNDPQGEAEFAR              | 772 | 22 | 6  | 28.69  | b3b6b16b17*b17y7                                | 2396.16 | 80.661  | 13148   | 3 | 799.39  | 15.79  |
| P12814 ACTN1_HUMAN Alpha-actinin-1 | 27 |                       | ATLPDADK                            | 555 | 8  | 8  | 65.08  | b3°b3b6°b6b7y4y6°y6                             | 830.43  | 27.167  | 12218   | 2 | 415.72  | 1.69   |
| P12814 ACTN1_HUMAN Alpha-actinin-1 | 28 |                       | GISQEQMNEFR                         | 741 | 11 | 4  | 23.16  | b6y7°y7y9                                       | 1338.64 | 47.070  | 8179    | 2 | 669.82  | 21.89  |
| P12814 ACTN1_HUMAN Alpha-actinin-1 | 29 |                       | DQALTEEHAR                          | 614 | 10 | 4  | 46.24  | b5b7b9y3                                        | 1169.54 | 56.038  | 7377    | 2 | 585.28  | -8.56  |
| P12814 ACTN1_HUMAN Alpha-actinin-1 | 30 |                       | ETADTDTADQVMASFK                    | 818 | 16 | 4  | 16.24  | b3b13y12°y12                                    | 1729.77 | 39.333  | 2290    | 4 | 433.20  | 5.86   |
| P12814 ACTN1_HUMAN Alpha-actinin-1 | 31 |                       | QQHNER                              | 624 | 6  | 1  | 13.2   | b3                                              | 811.39  | 27.129  | 2279    | 2 | 406.20  | 7.00   |
| P12814 ACTN1_HUMAN Alpha-actinin-1 | 32 |                       | MAPYTGPDSPVPGALDYMSFSTAL YGESDL     | 863 | 29 | 5  | 23.85  | b4b10y4y5y13                                    | 3055.30 | 97.156  | 2154    | 4 | 764.58  | -17.74 |
| P12814 ACTN1_HUMAN Alpha-actinin-1 | 33 |                       | DDPLTNLNTAFDVAEKYLDIPK              | 198 | 22 | 5  | 36.03  | b6b7*b7b8b21                                    | 2492.25 | 98.972  | 1073551 | 3 | 831.42  | -0.59  |
| P12814 ACTN1_HUMAN Alpha-actinin-1 | 34 |                       | IDQLEGDHQLIQEALIFDNKHTNY TMEHIR     | 684 | 30 | 15 | 63.02  | b3°b3b9°b9b11b13*b13b14y3y5y6y9°y9y10y12        | 3621.73 | 75.338  | 173544  | 5 | 725.15  | -12.74 |
| P12814 ACTN1_HUMAN Alpha-actinin-1 | 35 |                       | IVQTYHVNMAGTNPYTTITPQEIN GKWDHVR    | 577 | 31 | 17 | 95.24  | b7b9°b9b10b11*b11b13°b13y3y5y7y9y10y12y13y16y18 | 3583.74 | 67.096  | 97531   | 5 | 717.55  | -11.17 |
| P12814 ACTN1_HUMAN Alpha-actinin-1 | 36 |                       | ILAGDKNYITMDELR                     | 834 | 15 | 11 | 88.72  | b4b11b13y4°y4y5y6y9°y9y11y13                    | 1751.89 | 62.001  | 67823   | 3 | 584.63  | -5.37  |

|                                           |    |                       |                                          |     |    |    |        |                                                                             |         |         |        |   |         |        |
|-------------------------------------------|----|-----------------------|------------------------------------------|-----|----|----|--------|-----------------------------------------------------------------------------|---------|---------|--------|---|---------|--------|
| P12814 ACTN1_HUMAN Alpha-actinin-1        | 37 |                       | KHEAFESDLAAHQDR                          | 435 | 15 | 7  | 35.18  | b3°b3b4b9y6y8*y8                                                            | 1753.81 | 31.157  | 7185   | 4 | 439.21  | -11.48 |
| P12814 ACTN1_HUMAN Alpha-actinin-1        | 38 | Carbamidomethyl+C(11) | MVSDINNAWGCLEQVEKGYEEW<br>LLNEIR         | 359 | 28 | 3  | 21.54  | b6b7y3                                                                      | 3395.62 | 74.850  | 6349   | 6 | 566.78  | 6.04   |
| P12814 ACTN1_HUMAN Alpha-actinin-1        | 39 | Carbamidomethyl+C(2)  | ACLISLGYDIGNDPQGEAEFARIMS<br>IVDPNR      | 772 | 31 | 13 | 74.61  | b8b9°b9b11b12b13°b13b1<br>4b15°b15b19y8*y8                                  | 3421.69 | 118.295 | 6237   | 3 | 1141.23 | 10.49  |
| P12814 ACTN1_HUMAN Alpha-actinin-1        | 40 | Carbamidomethyl+C(7)  | KTFTAWCNSHLR                             | 34  | 12 | 3  | 21.17  | b6b8y10                                                                     | 1520.74 | 54.656  | 5566   | 2 | 760.87  | -2.33  |
| P12814 ACTN1_HUMAN Alpha-actinin-1        | 41 |                       | QKASIHEAWTDGK                            | 400 | 13 | 3  | 24.35  | b11y11y12                                                                   | 1470.71 | 54.422  | 4796   | 2 | 735.86  | -14.19 |
| P12814 ACTN1_HUMAN Alpha-actinin-1        | 42 |                       | DAKGISQEQMNEFR                           | 738 | 14 | 6  | 31.53  | b10b11°b11y6°y6y8                                                           | 1652.76 | 44.876  | 4072   | 2 | 826.88  | -5.61  |
| P12814 ACTN1_HUMAN Alpha-actinin-1        | 43 |                       | MEEIGRISIEMHGTLQLSHLR                    | 649 | 23 | 4  | 25.44  | b6b7y5y18                                                                   | 2694.37 | 97.254  | 2285   | 3 | 898.80  | 13.86  |
| P12814 ACTN1_HUMAN Alpha-actinin-1        | 44 |                       | RDQALTEEHAR                              | 613 | 11 | 5  | 30.14  | b4°b4b5°b5b8                                                                | 1325.64 | 31.159  | 1907   | 2 | 663.32  | -14.83 |
| P12814 ACTN1_HUMAN Alpha-actinin-1        | 45 | Phosphoryl STY(32)    | AAPFNWMEGAMEDLQDTFIVH<br>TIEEIQLTTAHEQFK | 517 | 38 | 8  | 33.99  | b6y4°y4y5y6°y6y11                                                           | 4442.00 | 114.720 | 3733   | 5 | 889.21  | -1.10  |
| P12814 ACTN1_HUMAN Alpha-actinin-1        | 46 | Oxidation+M(5)        | ISIEMHGTLQLSHLR                          | 655 | 17 | 3  | 15.44  | b5y8y11                                                                     | 1995.01 | 47.218  | 287732 | 3 | 665.68  | 8.44   |
| P12814 ACTN1_HUMAN Alpha-actinin-1        | 47 | Oxidation+M()         | AIMTYVSSFYHAFSGAQK                       | 236 | 18 | 7  | 44.59  | b5b6b7b9y5y9°y9                                                             | 2023.95 | 100.089 | 21508  | 3 | 675.32  | -3.26  |
| P12814 ACTN1_HUMAN Alpha-actinin-1        | 48 | Oxidation+M(14)       | ASIHEAWTDGKEAMLR                         | 402 | 16 | 5  | 39.81  | b6b8b11b13y10                                                               | 1830.90 | 69.590  | 3179   | 3 | 610.97  | 9.47   |
| P12814 ACTN1_HUMAN Alpha-actinin-1        | 49 | Oxidation+M(7)        | GISQEQMNEFR                              | 741 | 11 | 3  | 26.17  | b5y9y10                                                                     | 1354.62 | 38.884  | 2715   | 3 | 452.21  | 10.00  |
| P12814 ACTN1_HUMAN Alpha-actinin-1        | 50 |                       | LPDADKER                                 | 557 | 8  | 1  | 8      | b3                                                                          | 943.48  | 24.428  | 20218  | 2 | 472.24  | -3.17  |
| P12814 ACTN1_HUMAN Alpha-actinin-1        | 51 |                       | PDADKER                                  | 558 | 7  | 1  | 8      | b4                                                                          | 830.40  | 24.430  | 16439  | 2 | 415.70  | 1.62   |
| P12814 ACTN1_HUMAN Alpha-actinin-1        | 52 |                       | TLPDADKER                                | 556 | 9  | 1  | 8      | b8                                                                          | 1044.53 | 24.429  | 12235  | 2 | 522.77  | -4.79  |
| P12814 ACTN1_HUMAN Alpha-actinin-1        | 53 |                       | ILGIHNEVSK                               | 567 | 10 | 0  | 3.15   |                                                                             | 1109.64 | 57.462  | 11919  | 2 | 555.32  | 5.83   |
| P12814 ACTN1_HUMAN Alpha-actinin-1        | 54 |                       | AILGIHNEVSK                              | 566 | 11 | 0  | 3.15   |                                                                             | 1180.66 | 57.490  | 11106  | 2 | 590.84  | -4.76  |
| P12814 ACTN1_HUMAN Alpha-actinin-1        | 55 |                       | GIHNEVSK                                 | 569 | 8  | 1  | 7.44   | b5                                                                          | 883.46  | 57.529  | 2838   | 2 | 442.23  | -6.36  |
| P12814 ACTN1_HUMAN Alpha-actinin-1        | 56 | Carbamidomethyl+C(2)  | ICDQWDLGALTQK                            | 478 | 14 | 0  | 4.05   |                                                                             | 1643.79 | 69.111  | 15605  | 3 | 548.60  | 3.19   |
| P12814 ACTN1_HUMAN Alpha-actinin-1        | 57 |                       | ATLPDADKER                               | 555 | 10 | 0  | 2.25   |                                                                             | 1097.54 | 24.439  | 7946   | 3 | 366.52  | -12.57 |
| Q9H4B7 TBB1_HUMAN Tubulin beta-1<br>chain | 1  |                       | LGALFQPDSPFVHGNSGAGNNA<br>K              | 80  | 23 | 19 | 106.26 | b2b3b4b5b6b10°b10b11b1<br>3y5°y5y6y11y12y15y17°y1<br>7*y17y23               | 2387.16 | 73.823  | 292234 | 3 | 796.39  | 2.05   |
| Q9H4B7 TBB1_HUMAN Tubulin beta-1<br>chain | 2  |                       | LAVNMVPFPR                               | 252 | 10 | 14 | 109.18 | b2b3b5°b5y1y3y4y5y6y7y<br>8y9°y9y10                                         | 1143.63 | 71.952  | 238985 | 2 | 572.32  | -5.12  |
| Q9H4B7 TBB1_HUMAN Tubulin beta-1<br>chain | 3  |                       | AVLVLDLEPGTMDSIR                         | 62  | 15 | 7  | 53.19  | b3y3y8y9y11y13y15                                                           | 1615.84 | 73.994  | 230755 | 2 | 808.42  | 0.91   |
| Q9H4B7 TBB1_HUMAN Tubulin beta-1<br>chain | 4  |                       | LHFFMPGFAPLTAQGSQQYR                     | 262 | 20 | 25 | 149.15 | b2b3b4b5b9b12b13y2y3*y<br>3y5°y5y6y7*y7y8y9y10°y1<br>0*y10y11°y11y15°y15y20 | 2296.13 | 87.613  | 121665 | 3 | 766.05  | -1.06  |
| Q9H4B7 TBB1_HUMAN Tubulin beta-1<br>chain | 5  |                       | ALSVAELTQQMFDAR                          | 282 | 15 | 18 | 122.45 | b1b2b4°b4b11b12y2y3y5y<br>6y7y8°y8y10°y10y12y13y1<br>5                      | 1679.84 | 91.307  | 119067 | 2 | 840.42  | -1.67  |
| Q9H4B7 TBB1_HUMAN Tubulin beta-1<br>chain | 6  |                       | IMNSFSVMPSPK                             | 162 | 12 | 8  | 82.64  | y3y5y7y8y10°y10y11y12                                                       | 1337.66 | 62.739  | 107987 | 2 | 669.33  | 2.46   |

|                                          |    |                                                                    |                                        |     |    |    |        |                                                                            |         |         |        |   |         |        |
|------------------------------------------|----|--------------------------------------------------------------------|----------------------------------------|-----|----|----|--------|----------------------------------------------------------------------------|---------|---------|--------|---|---------|--------|
| Q9H4B7 TBB1_HUMAN Tubulin beta-1 chain   | 7  | Carbamidomethyl+C(6); Carbamidomethyl+C(8)                         | HESESCDCLQGFQIVHSLGGGTGS GMGTLMLNK     | 121 | 33 | 14 | 57.9   | b3b4b8b10y2y3y4y7y9y11y13y15°y15y33                                        | 3507.57 | 81.861  | 98189  | 4 | 877.65  | -2.37  |
| Q9H4B7 TBB1_HUMAN Tubulin beta-1 chain   | 8  |                                                                    | GHYTEGAELIENVLEVVR                     | 103 | 18 | 9  | 47.33  | b2b3b7b10y2y3y5y7y8                                                        | 2028.02 | 98.615  | 86524  | 3 | 676.68  | -9.81  |
| Q9H4B7 TBB1_HUMAN Tubulin beta-1 chain   | 9  | Carbamidomethyl+C(4)                                               | NSSCFVEWIPNNVK                         | 336 | 14 | 7  | 46.47  | b9y3y5*y5y9y11y14                                                          | 1693.81 | 74.613  | 71957  | 2 | 847.41  | 6.49   |
| Q9H4B7 TBB1_HUMAN Tubulin beta-1 chain   | 10 |                                                                    | GASALQLER                              | 37  | 9  | 9  | 72.26  | b3y1y3y4°y4y5y6y7y9                                                        | 944.51  | 39.957  | 60931  | 2 | 472.76  | -1.49  |
| Q9H4B7 TBB1_HUMAN Tubulin beta-1 chain   | 11 | Carbamidomethyl+C(10)                                              | EIVHIQIQCGNQIGAK                       | 2   | 17 | 8  | 30.93  | b5°b5b11°b11y4y8y10y17                                                     | 1864.98 | 55.253  | 60269  | 3 | 622.33  | 4.97   |
| Q9H4B7 TBB1_HUMAN Tubulin beta-1 chain   | 12 |                                                                    | LTTPTYGDLNHLVSLTMSGITSLR               | 216 | 25 | 10 | 67.83  | y2y3y4y5y7y8y9°y9y2y25                                                     | 2691.40 | 106.593 | 59988  | 3 | 897.81  | 0.64   |
| Q9H4B7 TBB1_HUMAN Tubulin beta-1 chain   | 13 |                                                                    | FWEMIGEEHGIDLAGSDR                     | 19  | 18 | 5  | 14.75  | b2b13y10y13y18                                                             | 2061.93 | 76.248  | 49887  | 3 | 687.98  | 0.12   |
| Q9H4B7 TBB1_HUMAN Tubulin beta-1 chain   | 14 |                                                                    | EVDQQLLSVQTR                           | 324 | 12 | 8  | 32.67  | b6*b6b12y2y3y5y6y12                                                        | 1415.76 | 51.847  | 44066  | 2 | 708.38  | 4.40   |
| Q9H4B7 TBB1_HUMAN Tubulin beta-1 chain   | 15 |                                                                    | IREEYPDR                               | 154 | 8  | 10 | 65.08  | b2b4b5°b5b7y1y2°y2y3y5                                                     | 1077.53 | 23.392  | 42843  | 2 | 539.27  | -0.34  |
| Q9H4B7 TBB1_HUMAN Tubulin beta-1 chain   | 16 |                                                                    | VSEHFSAMFK                             | 380 | 10 | 11 | 38.46  | b1b4°b4b5°b5b8b10y2y9°y9y10                                                | 1182.55 | 53.264  | 15346  | 3 | 394.85  | -11.05 |
| Q9H4B7 TBB1_HUMAN Tubulin beta-1 chain   | 17 |                                                                    | AFVHWYTSEGMDINEFGAEENNI HDLVSEYQQFQDAK | 392 | 37 | 7  | 22.67  | b13y4°y4y11°y11y12y16                                                      | 4361.97 | 87.665  | 5961   | 3 | 1454.66 | 8.96   |
| Q9H4B7 TBB1_HUMAN Tubulin beta-1 chain   | 18 |                                                                    | ISVYYNEAYGR                            | 46  | 11 | 7  | 39.88  | b8°b8*b8y3y6y10*y10                                                        | 1334.64 | 35.564  | 10312  | 2 | 667.82  | -0.82  |
| Q9H4B7 TBB1_HUMAN Tubulin beta-1 chain   | 19 |                                                                    | ISVYYNEAYGRK                           | 46  | 12 | 3  | 31.39  | y5y7y9                                                                     | 1462.73 | 43.542  | 35770  | 3 | 488.25  | -3.25  |
| Q9H4B7 TBB1_HUMAN Tubulin beta-1 chain   | 20 | Carbamidomethyl+C(4)                                               | VAVCDIPRGLSMAATFIGNNTAI QEIFNR         | 350 | 30 | 7  | 50.65  | b5b6b8b14b15y5y6                                                           | 3275.65 | 102.623 | 32113  | 3 | 1092.56 | -4.62  |
| Q9H4B7 TBB1_HUMAN Tubulin beta-1 chain   | 21 |                                                                    | FWEMIGEEHGIDLAGDRGASALQLER             | 19  | 27 | 3  | 11.49  | b7y4y12                                                                    | 2987.42 | 78.770  | 3757   | 3 | 996.48  | -4.25  |
| Q9H4B7 TBB1_HUMAN Tubulin beta-1 chain   | 22 | Oxidation+M(4)                                                     | FWEMIGEEHGIDLAGSDR                     | 19  | 18 | 5  | 23.52  | b15y5y7°y7y13                                                              | 2077.94 | 78.734  | 8171   | 3 | 693.32  | 5.99   |
| Q9H4B7 TBB1_HUMAN Tubulin beta-1 chain   | 23 |                                                                    | SALQLER                                | 39  | 7  | 0  | 1.8    |                                                                            | 816.45  | 39.963  | 2546   | 2 | 408.73  | -7.48  |
| Q9H4B7 TBB1_HUMAN Tubulin beta-1 chain   | 24 |                                                                    | GASALQLER                              | 37  | 9  | 0  | 1.8    |                                                                            | 926.49  | 40.001  | 2946   | 2 | 463.75  | -14.62 |
| P02679 FIBG_HUMAN Fibrinogen gamma chain | 1  |                                                                    | AIQLTYNPDESSKPNMIDAATLK                | 88  | 23 | 26 | 178.84 | b3b4b5°b5°b5b7b11b12°b12b13y2y3y4y6y10°y10*y10y14y16y17y18*y18y19y20y21y23 | 2520.27 | 65.710  | 429566 | 3 | 840.76  | 1.16   |
| P02679 FIBG_HUMAN Fibrinogen gamma chain | 2  |                                                                    | EGFGHLSPTGTTEFWLGNK                    | 238 | 20 | 11 | 56.63  | b6°b6b7b8y3y4y6y8°y8y20*y20                                                | 2207.03 | 76.243  | 295411 | 3 | 736.35  | -2.77  |
| P02679 FIBG_HUMAN Fibrinogen gamma chain | 3  |                                                                    | YEASILTHDSSIR                          | 121 | 13 | 17 | 129.03 | b1b2°b2b3b4b11°b11y3y4°y4y5y6y7y8y9y11y13                                  | 1491.73 | 48.410  | 286915 | 3 | 497.91  | -11.13 |
| P02679 FIBG_HUMAN Fibrinogen gamma chain | 4  | Carbamidomethyl+C(8); Carbamidomethyl+C(12); Carbamidomethyl+C(26) | VAQLEAQCQEPCKDTVQIHDITG KDCQDIANK      | 153 | 32 | 20 | 126.96 | b2b3b5b10b16y2y3y4y5°y5y8y9y10y11*y11y12y13y14y29y32                       | 3712.71 | 49.133  | 179909 | 5 | 743.35  | -7.17  |
| P02679 FIBG_HUMAN Fibrinogen gamma chain | 5  | Carbamidomethyl+C(8); Carbamidomethyl+C(12)                        | VAQLEAQCQEPCKDTVQIHDITG K              | 153 | 24 | 12 | 63.33  | b2b3b5y3y5y8y14y18*y18y19y20y24                                            | 2768.32 | 49.897  | 161686 | 4 | 692.84  | -4.32  |
| P02679 FIBG_HUMAN Fibrinogen gamma chain | 6  | Carbamidomethyl+C(5); Carbamidomethyl+C(9)                         | FGSYCPTTCGIADFLSTYQTK                  | 40  | 21 | 21 | 131.89 | b2b3b5y2y3*y3y4y5°y5y6*y6y7y8y9°y9y10y12y13°y13y16y21                      | 2417.09 | 87.778  | 158908 | 2 | 1209.05 | 6.57   |
| P02679 FIBG_HUMAN Fibrinogen gamma chain | 7  |                                                                    | ASTPNGYDNGIHWATWK                      | 382 | 17 | 6  | 48.79  | b15y3y4y5y6y17                                                             | 1893.92 | 80.122  | 150251 | 2 | 947.46  | 2.77   |

|                                              |    |                                            |                            |     |    |    |        |                                                          |         |         |        |   |         |        |
|----------------------------------------------|----|--------------------------------------------|----------------------------|-----|----|----|--------|----------------------------------------------------------|---------|---------|--------|---|---------|--------|
| P02679 FIBG_HUMAN Fibrinogen gamma chain     | 8  |                                            | VELEDWNGR                  | 273 | 9  | 7  | 43.75  | b2b3y1y5y7y8y9                                           | 1117.53 | 50.973  | 143707 | 2 | 559.27  | 2.08   |
| P02679 FIBG_HUMAN Fibrinogen gamma chain     | 9  |                                            | YLQEIYNSNNQK               | 134 | 12 | 15 | 116.81 | b2b3*b3b4b5b10b12y3y4y6y7*y7y8y9y12                      | 1513.74 | 43.544  | 130857 | 2 | 757.37  | 4.68   |
| P02679 FIBG_HUMAN Fibrinogen gamma chain     | 10 | Carbamidomethyl+C(3); Carbamidomethyl+C(4) | DNCCILDER                  | 31  | 9  | 12 | 65.53  | b2°b2*b2y1y2y3y4°y4y5y6y7y9                              | 1194.49 | 43.572  | 128762 | 2 | 597.75  | 1.12   |
| P02679 FIBG_HUMAN Fibrinogen gamma chain     | 11 |                                            | QSGLYFIKPLK                | 188 | 11 | 6  | 45.9   | y1y3y4y5y7y11                                            | 1293.74 | 64.431  | 102734 | 3 | 431.92  | -13.02 |
| P02679 FIBG_HUMAN Fibrinogen gamma chain     | 12 |                                            | IHLISTQSAIPYALR            | 258 | 15 | 9  | 69.41  | b2b3b4y4y5y11y12y13y15                                   | 1682.94 | 69.807  | 96686  | 3 | 561.65  | -10.01 |
| P02679 FIBG_HUMAN Fibrinogen gamma chain     | 13 | Carbamidomethyl+C(9)                       | ANQQFLVYCEIDGSGNGWTVFQK    | 199 | 23 | 5  | 27.73  | y3y4y11°y11y14                                           | 2661.23 | 87.025  | 19325  | 3 | 887.75  | -2.94  |
| P02679 FIBG_HUMAN Fibrinogen gamma chain     | 14 |                                            | TSTADYAMFK                 | 282 | 10 | 6  | 52.18  | b8b9y5y6y8y10                                            | 1134.52 | 51.930  | 13335  | 1 | 1134.52 | 6.46   |
| P02679 FIBG_HUMAN Fibrinogen gamma chain     | 15 |                                            | QVRPEHPAETEYDSLYPEDDL      | 432 | 21 | 6  | 23.54  | b5b9b10°b10y11°y11                                       | 2503.12 | 91.650  | 36645  | 4 | 626.54  | -2.34  |
| P02679 FIBG_HUMAN Fibrinogen gamma chain     | 16 |                                            | NWIQYK                     | 232 | 6  | 3  | 25.94  | b3y5*y5                                                  | 851.45  | 40.760  | 21882  | 1 | 851.45  | 5.09   |
| P02679 FIBG_HUMAN Fibrinogen gamma chain     | 17 |                                            | FFTSHNGMQFSTWDNDNDK        | 328 | 19 | 3  | 21.11  | b6b10b13                                                 | 2290.99 | 76.503  | 14987  | 3 | 764.34  | 20.99  |
| P02679 FIBG_HUMAN Fibrinogen gamma chain     | 18 |                                            | NWIQYKEGFGHLSPTGTTEFWLGNEK | 232 | 26 | 3  | 11.67  | b7y4y6                                                   | 3039.47 | 107.121 | 64066  | 4 | 760.62  | 3.21   |
| P02679 FIBG_HUMAN Fibrinogen gamma chain     | 19 | Carbamidomethyl+C(9)                       | ANQQFLVYCEIDGSGNGWTVFQKR   | 199 | 24 | 6  | 12.15  | b6y13°y13*y13y15°y15                                     | 2817.37 | 79.285  | 14544  | 3 | 939.79  | 9.88   |
| P02679 FIBG_HUMAN Fibrinogen gamma chain     | 20 |                                            | VGPEADKYR                  | 292 | 9  | 10 | 86.25  | b5b8°b8y3y4y6°y6y7°y7y8                                  | 1034.52 | 21.632  | 14439  | 2 | 517.77  | -2.71  |
| P02679 FIBG_HUMAN Fibrinogen gamma chain     | 21 |                                            | VELEDWNGRTSTADYAMFK        | 273 | 19 | 6  | 36.91  | b5b10b13b14y12y14                                        | 2233.05 | 85.058  | 4159   | 4 | 559.02  | 9.95   |
| P02679 FIBG_HUMAN Fibrinogen gamma chain     | 22 |                                            | DLQSLEDILHQVENKTSEVK       | 64  | 20 | 5  | 34.83  | b7b8b9°b9y10                                             | 2325.21 | 119.630 | 1921   | 3 | 775.74  | 6.51   |
| P02679 FIBG_HUMAN Fibrinogen gamma chain     | 23 | Phosphoryl STY(7)                          | EGFGHLSPTGTTEFWLGNEK       | 238 | 20 | 3  | 13.63  | b4b6y12                                                  | 2286.99 | 67.206  | 4018   | 4 | 572.50  | -3.84  |
| P02679 FIBG_HUMAN Fibrinogen gamma chain     | 24 | Oxidation+M(16)                            | AIQLTYNPDESSKPNMIDAATLK    | 88  | 23 | 4  | 16.41  | b13b15y8y12                                              | 2536.23 | 99.013  | 90527  | 3 | 846.08  | -12.71 |
| P02679 FIBG_HUMAN Fibrinogen gamma chain     | 25 |                                            | ASILTHDSSIR                | 123 | 11 | 2  | 7.31   | b3°b3                                                    | 1199.63 | 48.429  | 7413   | 2 | 600.32  | -6.11  |
| P02679 FIBG_HUMAN Fibrinogen gamma chain     | 26 |                                            | QSGLYFIKPLK                | 188 | 11 | 0  | 2.7    |                                                          | 1276.73 | 64.428  | 16160  | 3 | 426.25  | 4.02   |
| P02679 FIBG_HUMAN Fibrinogen gamma chain     | 27 |                                            | YLQEIYNSNNQK               | 134 | 12 | 0  | 3.15   |                                                          | 1496.70 | 43.571  | 2010   | 3 | 499.57  | 4.65   |
| P60660 MYL6_HUMAN Myosin light polypeptide 6 | 1  |                                            | VLDFEHFLPMLQTVAK           | 63  | 16 | 15 | 114.66 | b2b3b6b7b8y1y2y3y4y5y6y8y10y14y16                        | 1887.98 | 101.161 | 193974 | 3 | 630.00  | -12.41 |
| P60660 MYL6_HUMAN Myosin light polypeptide 6 | 2  |                                            | ALGQNPTNAEVLK              | 37  | 13 | 20 | 109.48 | b2b4b5*b5b10°b10*b10b11*b11b12*b12y1y2y4y7y8y9y11*y11y13 | 1354.74 | 44.126  | 164170 | 2 | 677.87  | 2.97   |
| P60660 MYL6_HUMAN Myosin light polypeptide 6 | 3  |                                            | EAFQLFDR                   | 13  | 8  | 7  | 39.59  | b2°b2y2y3y4y6y8                                          | 1025.50 | 67.944  | 92560  | 2 | 513.26  | -2.38  |
| P60660 MYL6_HUMAN Myosin light polypeptide 6 | 4  | Carbamidomethyl+C(6)                       | ILYSQCGDVMR                | 26  | 11 | 11 | 63.42  | b2y1y2y3y6y7*y7y8y9y11*y11                               | 1341.64 | 47.762  | 89839  | 2 | 671.32  | 6.01   |
| P60660 MYL6_HUMAN Myosin light polypeptide 6 | 5  |                                            | NKDQGTIEDYVEGLR            | 79  | 15 | 13 | 86.96  | b3b8b11y3y5y6°y6y7°y7y8y13y15*y15                        | 1786.82 | 55.271  | 54333  | 3 | 596.28  | -0.96  |
| P60660 MYL6_HUMAN Myosin light polypeptide 6 | 6  |                                            | HVLVLTGEEK                 | 110 | 9  | 5  | 29.25  | b2b3y2y3y5                                               | 995.59  | 41.784  | 51844  | 2 | 498.30  | -2.51  |
| P60660 MYL6_HUMAN Myosin light polypeptide 6 | 7  |                                            | VFDKEGNGTVMGAER            | 94  | 16 | 15 | 111.14 | b5b6b7b11b12*b12y4y6y9y10°y10y11°y11y12y16               | 1722.86 | 108.914 | 21122  | 2 | 861.93  | 5.67   |

|                                               |    |                      |                                       |      |    |    |        |                                                                            |         |         |        |   |         |        |
|-----------------------------------------------|----|----------------------|---------------------------------------|------|----|----|--------|----------------------------------------------------------------------------|---------|---------|--------|---|---------|--------|
| IP60660 MYL6_HUMAN Myosin light polypeptide 6 | 8  |                      | EGNGTVMGAEIR                          | 98   | 12 | 5  | 43.34  | y5y6y7y7y11                                                                | 1233.60 | 42.546  | 21790  | 2 | 617.30  | 5.05   |
| IP60660 MYL6_HUMAN Myosin light polypeptide 6 | 9  |                      | VFDKEGNGTVMGAEIR                      | 94   | 16 | 4  | 26.27  | b3y5y7y12                                                                  | 1722.84 | 48.885  | 93130  | 3 | 574.95  | -2.76  |
| IP60660 MYL6_HUMAN Myosin light polypeptide 6 | 10 |                      | EAFQLFDRGTGDGK                        | 13   | 13 | 13 | 83.81  | b4°b4b5b6*b6b7*b7y5y7y8°y8y11*y11                                          | 1483.73 | 105.882 | 6839   | 2 | 742.37  | 8.23   |
| IP60660 MYL6_HUMAN Myosin light polypeptide 6 | 11 |                      | NKDQGTIEDYVEGLR                       | 79   | 15 | 3  | 25.25  | b11b12b14                                                                  | 1786.83 | 91.587  | 6774   | 2 | 893.92  | 0.61   |
| IP60660 MYL6_HUMAN Myosin light polypeptide 6 | 12 |                      | PMLQTVAK                              | 71   | 8  | 2  | 20.44  | b3b4                                                                       | 887.50  | 101.158 | 1877   | 2 | 444.25  | -7.63  |
| IP60660 MYL6_HUMAN Myosin light polypeptide 6 | 13 |                      | EAFQLFDR                              | 13   | 8  | 0  | 1.35   |                                                                            | 1007.50 | 67.924  | 8756   | 2 | 504.25  | 6.54   |
| IQ15404 RSU1_HUMAN Ras suppressor protein 1   | 1  |                      | AENNPWVTPIADQFQLGVSHVFEYIR            | 212  | 26 | 14 | 78.29  | b2b4*b4b7b8y5y6y10y12y18y19y20y22y26                                       | 3030.52 | 112.321 | 63876  | 3 | 1010.85 | 4.27   |
| IQ15404 RSU1_HUMAN Ras suppressor protein 1   | 2  |                      | GISNMLDVNGLFTLSHITQLVLSHNK            | 25   | 26 | 7  | 34.82  | b4b5y1y2y3y4y20                                                            | 2851.49 | 112.181 | 45066  | 4 | 713.63  | -8.05  |
| IQ15404 RSU1_HUMAN Ras suppressor protein 1   | 3  |                      | NLEVLNFFNNQIEELPTQISSLQK              | 63   | 24 | 18 | 84.01  | b2b3b4b5*b5b7b9y2y3y4*y4y5y9*y9y12°y12y13y24                               | 2818.46 | 107.901 | 26488  | 3 | 940.16  | 0.26   |
| IQ15404 RSU1_HUMAN Ras suppressor protein 1   | 4  |                      | GFGSLPALEVLDLTYNNLSENSLP<br>GNFFYLTLR | 103  | 34 | 8  | 33.84  | b2b4b5°b5y1y4y5y11                                                         | 3775.96 | 133.523 | 15270  | 3 | 1259.32 | 9.89   |
| IQ15404 RSU1_HUMAN Ras suppressor protein 1   | 5  |                      | LTVLPPELGNLDLTGQK                     | 191  | 17 | 3  | 22.43  | b4y13y14                                                                   | 1808.02 | 85.805  | 41596  | 2 | 904.51  | 2.57   |
| IQ15404 RSU1_HUMAN Ras suppressor protein 1   | 6  |                      | ELHIQGNR                              | 183  | 8  | 6  | 34.82  | b3°b3b7°b7*b7y6                                                            | 966.50  | 29.485  | 20225  | 2 | 483.75  | -12.44 |
| IQ15404 RSU1_HUMAN Ras suppressor protein 1   | 7  |                      | HNLNGMNR                              | 89   | 8  | 3  | 34.82  | b7y3y6                                                                     | 954.48  | 53.253  | 13960  | 2 | 477.74  | -12.15 |
| IQ15404 RSU1_HUMAN Ras suppressor protein 1   | 8  |                      | YLYGR                                 | 243  | 5  | 1  | 12.75  | y3                                                                         | 671.35  | 59.474  | 13416  | 2 | 336.18  | 1.73   |
| IQ15404 RSU1_HUMAN Ras suppressor protein 1   | 9  |                      | ALYLSNDNDFEILPPDIGK                   | 137  | 18 | 4  | 14.75  | b7y5°y5y14                                                                 | 2020.03 | 60.284  | 12184  | 2 | 1010.52 | 0.42   |
| IQ15404 RSU1_HUMAN Ras suppressor protein 1   | 10 |                      | HMQANPEPPK                            | 248  | 10 | 4  | 46.24  | b3b5b8y6                                                                   | 1148.53 | 35.573  | 11425  | 2 | 574.77  | -19.87 |
| IQ15404 RSU1_HUMAN Ras suppressor protein 1   | 11 |                      | LNTLPR                                | 97   | 6  | 1  | 13.2   | y4                                                                         | 713.42  | 30.239  | 5031   | 2 | 357.21  | -13.18 |
| IQ15404 RSU1_HUMAN Ras suppressor protein 1   | 12 |                      | SETYKYLYGR                            | 238  | 10 | 3  | 27.48  | b9y8y9                                                                     | 1279.63 | 117.543 | 4865   | 2 | 640.32  | -4.29  |
| IQ15404 RSU1_HUMAN Ras suppressor protein 1   | 13 |                      | EKNQPEVDMSDR                          | 13   | 12 | 7  | 57.07  | b5°b5b8y3y6y9y10                                                           | 1447.64 | 29.506  | 4503   | 2 | 724.32  | -5.57  |
| IQ15404 RSU1_HUMAN Ras suppressor protein 1   | 14 | Phosphoryl STY(18)   | GISNMLDVNGLFTLSHITQLVLSHNK            | 25   | 26 | 6  | 34.82  | b3b4y8y9*y9y12_H3PO4y12                                                    | 2931.47 | 104.823 | 101516 | 4 | 733.62  | 1.58   |
| IP35749 MYH11_HUMAN Myosin-11                 | 1  |                      | QLLQANPILEAFGNAK                      | 216  | 16 | 28 | 174.36 | b2*b2b3*b3b4*b4b5*b5b6*b6b16y1y2y4y5y6y7°y7*y7y8y10y11y12y13*y13y14*y14y16 | 1726.95 | 90.461  | 238751 | 2 | 863.98  | 0.78   |
| IP35749 MYH11_HUMAN Myosin-11                 | 2  |                      | TQLEELEDELQATEDAK                     | 1545 | 17 | 23 | 178.33 | b2*b2b4b5b9b11°b11b13b14y2y3y4y5y6y8y9°y9y11y12y13°y13y15y17               | 1961.93 | 78.129  | 173219 | 2 | 981.47  | 5.48   |
| IP35749 MYH11_HUMAN Myosin-11                 | 3  |                      | KEEELQAALAR                           | 1087 | 11 | 12 | 81.92  | b2°b2b3°b3b8y4y5y7y9y10*y10y11                                             | 1257.68 | 41.624  | 81195  | 2 | 629.34  | 0.29   |
| IP35749 MYH11_HUMAN Myosin-11                 | 4  | Carbamidomethyl+C(1) | CNGVLEGIR                             | 700  | 9  | 10 | 59.51  | b1b2*b2b4y3y4y5y7y9*y9                                                     | 1017.51 | 47.905  | 75078  | 2 | 509.26  | -1.50  |
| IP35749 MYH11_HUMAN Myosin-11                 | 5  |                      | FDQLLAEEK                             | 1452 | 9  | 8  | 43.24  | b2b6*b6b7y2y5y6y9                                                          | 1092.56 | 49.312  | 48659  | 2 | 546.78  | 1.12   |

|                              |    |                      |                         |      |    |    |        |                                                                                                      |         |         |        |   |         |        |
|------------------------------|----|----------------------|-------------------------|------|----|----|--------|------------------------------------------------------------------------------------------------------|---------|---------|--------|---|---------|--------|
| P35749 MYH11_HUMAN Myosin-11 | 6  |                      | NTDQASMPDNTAAQK         | 365  | 15 | 32 | 165.46 | b1*b1b2*b2b3b7*b7*b7b1<br>1y1y3*y3y4*y4y5*y5y6*y<br>6y7y8*y8y9*y9y10*y10*y1<br>0y11*y11y12*y12y13y15 | 1591.70 | 25.342  | 40181  | 2 | 796.36  | 0.69   |
| P35749 MYH11_HUMAN Myosin-11 | 7  |                      | ALEEALAKEELER           | 1490 | 14 | 6  | 37.07  | b5b10b11y4y8y14                                                                                      | 1629.85 | 97.372  | 29058  | 2 | 815.43  | 12.58  |
| P35749 MYH11_HUMAN Myosin-11 | 8  |                      | DEIFATAKENEK            | 1668 | 12 | 8  | 25.15  | b2b7*b7y6*y6y7*y7*y7                                                                                 | 1394.70 | 68.654  | 15535  | 2 | 697.85  | 13.74  |
| P35749 MYH11_HUMAN Myosin-11 | 9  |                      | QTLEKENADLAGELR         | 1226 | 15 | 6  | 23.19  | b3*b3*b3b4y12y15                                                                                     | 1686.88 | 91.383  | 14193  | 2 | 843.94  | 6.22   |
| P35749 MYH11_HUMAN Myosin-11 | 10 |                      | LEDEILVMDDQNNK          | 982  | 14 | 5  | 36.97  | b5b6y5*y5y6                                                                                          | 1675.77 | 80.997  | 8104   | 2 | 838.39  | -6.77  |
| P35749 MYH11_HUMAN Myosin-11 | 11 |                      | SLEADMLQQLQEDLAAER      | 1683 | 18 | 7  | 38.56  | b3b6*b6b7b12y7y10                                                                                    | 2003.00 | 86.851  | 6253   | 2 | 1002.01 | 13.83  |
| P35749 MYH11_HUMAN Myosin-11 | 12 |                      | LQAQMKDFQRELEDAR        | 1649 | 16 | 5  | 23.94  | y2y6y8y10*y10                                                                                        | 1977.96 | 81.098  | 4955   | 2 | 989.48  | -10.37 |
| P35749 MYH11_HUMAN Myosin-11 | 13 |                      | EILLQVEDER              | 1852 | 10 | 5  | 25.72  | b3b9*b9y2y7                                                                                          | 1243.65 | 87.588  | 4590   | 2 | 622.33  | -4.81  |
| P35749 MYH11_HUMAN Myosin-11 | 14 |                      | MAQQMLDLEEQLSEEEAAR     | 947  | 19 | 4  | 22.39  | b6b8b12y5                                                                                            | 2263.01 | 102.458 | 3414   | 2 | 1132.01 | -4.85  |
| P35749 MYH11_HUMAN Myosin-11 | 15 |                      | LQQLFNHTMFILEQEEYQR     | 482  | 19 | 4  | 14.15  | b2b8b11y5                                                                                            | 2467.24 | 102.660 | 2427   | 3 | 823.08  | 11.97  |
| P35749 MYH11_HUMAN Myosin-11 | 16 |                      | LQQELDDLVDLDNQR         | 1424 | 16 | 3  | 24.61  | y4y5y13                                                                                              | 1912.98 | 116.220 | 2355   | 2 | 956.99  | 9.44   |
| P35749 MYH11_HUMAN Myosin-11 | 17 |                      | SHEAQVQEMR              | 1188 | 10 | 4  | 39.43  | b7b8y4y9                                                                                             | 1214.55 | 30.517  | 2238   | 3 | 405.52  | -6.93  |
| P35749 MYH11_HUMAN Myosin-11 | 18 |                      | NFINSPVAQADWAAK         | 18   | 15 | 4  | 30.38  | b12b13y12y14                                                                                         | 1631.79 | 58.535  | 1595   | 2 | 816.40  | -14.36 |
| P35749 MYH11_HUMAN Myosin-11 | 19 |                      | DVASLSSQLQDTQELLQEETR   | 1308 | 21 | 3  | 19.82  | y3y8y12                                                                                              | 2390.14 | 107.372 | 1516   | 2 | 1195.57 | -11.24 |
| P35749 MYH11_HUMAN Myosin-11 | 20 |                      | ALELDPNLYR              | 752  | 10 | 3  | 25.72  | b5b9y8                                                                                               | 1203.62 | 38.600  | 196701 | 2 | 602.32  | -10.24 |
| P35749 MYH11_HUMAN Myosin-11 | 21 |                      | DLGEELEALK              | 1142 | 10 | 4  | 32.71  | b3*b3b7b8                                                                                            | 1116.58 | 71.832  | 37551  | 2 | 558.79  | -2.08  |
| P35749 MYH11_HUMAN Myosin-11 | 22 |                      | HAQAVEELTEQLEQFK        | 1200 | 16 | 4  | 26.94  | b5b9b10y7                                                                                            | 1899.91 | 47.627  | 27388  | 3 | 633.97  | -19.21 |
| P35749 MYH11_HUMAN Myosin-11 | 23 |                      | LEAQVQELQSK             | 1256 | 11 | 3  | 23.16  | b7y3y5                                                                                               | 1272.67 | 74.354  | 21680  | 2 | 636.84  | -9.40  |
| P35749 MYH11_HUMAN Myosin-11 | 24 |                      | EIENLTQQYEEK            | 1399 | 12 | 4  | 21.17  | b5*b5y5y9                                                                                            | 1523.74 | 40.989  | 18463  | 2 | 762.37  | 9.93   |
| P35749 MYH11_HUMAN Myosin-11 | 25 |                      | TEFSIIHYAGK             | 572  | 11 | 5  | 35.11  | b6*b6b7b10y3                                                                                         | 1265.65 | 26.429  | 14195  | 2 | 633.33  | -2.60  |
| P35749 MYH11_HUMAN Myosin-11 | 26 | Carbamidomethyl+C(2) | LCTEQGSHPK              | 552  | 10 | 5  | 25.72  | b7y4*y4y6*y6                                                                                         | 1156.54 | 36.443  | 12266  | 3 | 386.18  | -4.54  |
| P35749 MYH11_HUMAN Myosin-11 | 27 |                      | QGFEAASIK               | 42   | 9  | 3  | 37.03  | b3b7b8                                                                                               | 950.47  | 28.729  | 8901   | 2 | 475.74  | -20.61 |
| P35749 MYH11_HUMAN Myosin-11 | 28 |                      | LEGDASDFHEQIADLQAQIAELK | 1059 | 23 | 6  | 33.29  | b3b4b15y10y14y16                                                                                     | 2541.22 | 99.043  | 8881   | 2 | 1271.12 | -8.74  |
| P35749 MYH11_HUMAN Myosin-11 | 29 |                      | TFHFIFYMIAGAK           | 279  | 13 | 4  | 30.78  | b3b8b9y4                                                                                             | 1561.76 | 53.886  | 6489   | 2 | 781.38  | -17.43 |
| P35749 MYH11_HUMAN Myosin-11 | 30 |                      | NTTPNFVR                | 669  | 8  | 8  | 49.32  | b3b7*b7y6*y6y7*y7*y7                                                                                 | 948.49  | 29.473  | 4900   | 2 | 474.75  | -3.93  |
| P35749 MYH11_HUMAN Myosin-11 | 31 |                      | NMDPLNDNVTSLLNASSDK     | 594  | 19 | 4  | 21.93  | b11b12y7y7                                                                                           | 2047.94 | 73.894  | 4642   | 2 | 1024.47 | -12.22 |
| P35749 MYH11_HUMAN Myosin-11 | 32 |                      | NLLQEQLQAETELYAEAEEMR   | 889  | 21 | 11 | 71.69  | b3b8b9b18y3y5y11*y11y1<br>3y14y20                                                                    | 2508.19 | 98.963  | 3889   | 4 | 627.80  | -2.63  |
| P35749 MYH11_HUMAN Myosin-11 | 33 |                      | GQQLQAER                | 937  | 8  | 6  | 34.82  | b4*b4y3y5*y5*y5                                                                                      | 929.48  | 36.482  | 3626   | 2 | 465.24  | 0.53   |

|                              |    |                       |                                       |      |    |    |       |                                      |         |         |        |   |         |        |
|------------------------------|----|-----------------------|---------------------------------------|------|----|----|-------|--------------------------------------|---------|---------|--------|---|---------|--------|
| P35749 MYH11_HUMAN Myosin-11 | 34 |                       | LQDFASTVEALEEGK                       | 1379 | 15 | 6  | 45.2  | b5b10b12b13y5y10                     | 1636.77 | 60.891  | 3307   | 3 | 546.26  | -21.70 |
| P35749 MYH11_HUMAN Myosin-11 | 35 |                       | LHEMEGAVK                             | 1800 | 9  | 8  | 55.79 | b3°b3b4°b4b6°b6b8°b8                 | 1013.49 | 19.676  | 3234   | 2 | 507.25  | -18.01 |
| P35749 MYH11_HUMAN Myosin-11 | 36 |                       | MAEQYK                                | 1863 | 6  | 2  | 13.2  | y5*y5                                | 769.36  | 84.699  | 2589   | 1 | 769.36  | 7.38   |
| P35749 MYH11_HUMAN Myosin-11 | 37 |                       | IVDMYK                                | 137  | 6  | 1  | 13.2  | y3                                   | 768.40  | 44.883  | 2117   | 2 | 384.70  | 4.61   |
| P35749 MYH11_HUMAN Myosin-11 | 38 |                       | ENADLAGELR                            | 1231 | 10 | 7  | 38.46 | b3°b3b5b6°b6y8°y8                    | 1087.55 | 73.768  | 2069   | 1 | 1087.55 | 8.19   |
| P35749 MYH11_HUMAN Myosin-11 | 39 |                       | ELDEATESNEAMGR                        | 1905 | 14 | 4  | 26.05 | y5y8y9°y9                            | 1551.69 | 88.615  | 1790   | 2 | 776.35  | 21.48  |
| P35749 MYH11_HUMAN Myosin-11 | 40 |                       | ISDLTTNLAEEEEK                        | 1007 | 14 | 4  | 31.53 | b5b6y4y8                             | 1591.76 | 55.198  | 1672   | 2 | 796.38  | -5.75  |
| P35749 MYH11_HUMAN Myosin-11 | 41 | Carbamidomethyl+C(26) | QGASFLGILDIAGFEIFEVNSFEQL<br>CINYTNEK | 449  | 33 | 6  | 27.86 | b3b5b13y3y4°y4                       | 3766.89 | 119.791 | 1543   | 4 | 942.48  | 14.78  |
| P35749 MYH11_HUMAN Myosin-11 | 42 |                       | TEFSIIHYAGKVDYNASAWLTK                | 572  | 22 | 11 | 41.51 | b8b9°b9b14b16b19y9°y9y<br>13°y13°y13 | 2514.24 | 98.978  | 488028 | 3 | 838.75  | -10.88 |
| P35749 MYH11_HUMAN Myosin-11 | 43 |                       | LMTTLRNTTPNFVR                        | 663  | 14 | 11 | 48.27 | b3°b3b4b8°b8b11°b11y4*<br>y4y8*y8    | 1663.91 | 115.444 | 13549  | 2 | 832.46  | 6.90   |
| P35749 MYH11_HUMAN Myosin-11 | 44 | Carbamidomethyl+C(12) | FSKVEDMAELTCLNEASVLHNL                | 83   | 23 | 5  | 22.72 | b6b7b18°b18y3                        | 2676.30 | 114.315 | 10502  | 4 | 669.83  | -4.65  |
| P35749 MYH11_HUMAN Myosin-11 | 45 |                       | MLKAEMEDLVSSK                         | 1507 | 13 | 4  | 19.58 | b8b12y8°y8                           | 1480.75 | 87.643  | 10176  | 2 | 740.88  | 6.68   |
| P35749 MYH11_HUMAN Myosin-11 | 46 |                       | SHEAQVQEMRQK                          | 1188 | 12 | 3  | 21.17 | b10y8y10                             | 1470.70 | 87.583  | 9197   | 2 | 735.85  | -8.47  |
| P35749 MYH11_HUMAN Myosin-11 | 47 |                       | KMAQQMLDLEEQLEEEAAR                   | 946  | 20 | 3  | 23.05 | b7b10b11                             | 2391.14 | 91.933  | 7247   | 3 | 797.72  | 8.27   |
| P35749 MYH11_HUMAN Myosin-11 | 48 |                       | EEKGDEVVVELVENGK                      | 51   | 16 | 4  | 26.27 | b4b9b11y4                            | 1772.87 | 62.681  | 4915   | 2 | 886.94  | -12.32 |
| P35749 MYH11_HUMAN Myosin-11 | 49 |                       | MAQQMLDLEEQLEEEAARQK                  | 947  | 21 | 5  | 20.53 | b3b6b9°b9y13                         | 2519.15 | 91.628  | 4669   | 2 | 1260.08 | -8.82  |
| P35749 MYH11_HUMAN Myosin-11 | 50 |                       | SKLHEMEGAVK                           | 1798 | 11 | 3  | 23.16 | b6b9y9                               | 1228.65 | 35.486  | 4303   | 3 | 410.22  | 11.62  |
| P35749 MYH11_HUMAN Myosin-11 | 51 |                       | QLHEYTELEDERK                         | 1596 | 14 | 4  | 18.27 | b4b8y7°y7                            | 1818.84 | 55.969  | 4027   | 2 | 909.92  | -4.43  |
| P35749 MYH11_HUMAN Myosin-11 | 52 |                       | VHKLQNEVESVTGMLNEAEGK                 | 1281 | 21 | 7  | 52.47 | y5y7y8y9y11*y11y14                   | 2312.14 | 103.821 | 3958   | 2 | 1156.57 | -8.45  |
| P35749 MYH11_HUMAN Myosin-11 | 53 |                       | RQLEEAEESQR                           | 1883 | 12 | 9  | 66.4  | b4b5°b5b6b7b8°b8*y8y7                | 1503.71 | 27.100  | 3941   | 2 | 752.36  | 7.23   |
| P35749 MYH11_HUMAN Myosin-11 | 54 |                       | RGNETSFVPSR                           | 1929 | 11 | 3  | 26.17 | b5b6y8                               | 1249.63 | 69.001  | 3938   | 3 | 417.21  | 0.59   |
| P35749 MYH11_HUMAN Myosin-11 | 55 |                       | VIENADGSEETDTRDADFN GTK               | 1946 | 23 | 5  | 19.04 | b8y9*y9y12y14                        | 2513.08 | 100.103 | 3611   | 2 | 1257.04 | -4.18  |
| P35749 MYH11_HUMAN Myosin-11 | 56 |                       | VDYNASAWLTKNMDPLNDNVTS<br>LLNASSDK    | 583  | 30 | 8  | 24.67 | b10b13°b13y4y12y14°y14<br>y23        | 3296.55 | 135.846 | 3489   | 4 | 824.89  | -7.26  |
| P35749 MYH11_HUMAN Myosin-11 | 57 |                       | SLEADLMQLQEDLAAAERAR                  | 1683 | 20 | 6  | 31.77 | b4b8b11°b11b14y10                    | 2230.13 | 108.173 | 3055   | 3 | 744.05  | 7.66   |
| P35749 MYH11_HUMAN Myosin-11 | 58 |                       | DLQARDEQNEEK                          | 1578 | 12 | 11 | 71.58 | b3b5°b5b11y3°y3y4y5y11°<br>y11*y11   | 1474.69 | 136.466 | 2681   | 1 | 1474.69 | 5.63   |
| P35749 MYH11_HUMAN Myosin-11 | 59 |                       | LEVNMQALKGQFER                        | 1564 | 14 | 7  | 43.46 | b3b4b5b13°b13y3°y3                   | 1662.87 | 47.106  | 2678   | 3 | 554.96  | 6.75   |
| P35749 MYH11_HUMAN Myosin-11 | 60 |                       | ALDEETRSHEAQVQEMR                     | 1181 | 17 | 3  | 15.44 | b9b14y8                              | 2028.96 | 75.285  | 1844   | 4 | 507.99  | 7.94   |
| P35749 MYH11_HUMAN Myosin-11 | 61 |                       | QADLEKEELAEELASSLSGR                  | 1704 | 20 | 9  | 42.43 | b4b5b6°b6b12°b12y6°y6y1<br>6         | 2175.06 | 87.587  | 1797   | 3 | 725.69  | -6.85  |
| P35749 MYH11_HUMAN Myosin-11 | 62 | Phosphoryl STY(7)     | LQDFASTVEALEEGK                       | 1379 | 15 | 5  | 24.36 | b5°b5b11y5y7                         | 1716.78 | 96.434  | 118947 | 3 | 572.93  | 9.81   |



|                                             |    |                                          |                              |      |    |    |        |                                                                            |         |         |        |   |         |        |
|---------------------------------------------|----|------------------------------------------|------------------------------|------|----|----|--------|----------------------------------------------------------------------------|---------|---------|--------|---|---------|--------|
| P35749 MYH11_HUMAN Myosin-11                | 63 | Phosphoryl STY(7)                        | QGFEAASIKEEK                 | 42   | 12 | 4  | 30.61  | b3b6y6y11                                                                  | 1416.64 | 49.572  | 48141  | 3 | 472.88  | 5.95   |
| P35749 MYH11_HUMAN Myosin-11                | 64 | Phosphoryl STY(9)                        | IRELEGHISDLQEDLDSER          | 1112 | 19 | 6  | 27.68  | b3b9y3°y3y5y10                                                             | 2334.05 | 87.611  | 14721  | 4 | 584.27  | 0.63   |
| P35749 MYH11_HUMAN Myosin-11                | 65 | Phosphoryl STY(12)                       | DVASLSSQLQDTQELLQEETR        | 1308 | 21 | 5  | 21.63  | b10*b10b11y10°y10                                                          | 2470.09 | 114.888 | 6063   | 3 | 824.04  | -13.24 |
| P35749 MYH11_HUMAN Myosin-11                | 66 | Phosphoryl STY(5)                        | QLHEYETELEDER                | 1596 | 13 | 4  | 24.35  | b4y7°y7y8                                                                  | 1770.70 | 96.443  | 1902   | 4 | 443.43  | -9.65  |
| P35749 MYH11_HUMAN Myosin-11                | 67 | Phosphoryl STY(9)                        | GNETSFVPSR                   | 1930 | 10 | 3  | 32.71  | b3b7b8                                                                     | 1173.49 | 19.632  | 1832   | 2 | 587.25  | 4.16   |
| P35749 MYH11_HUMAN Myosin-11                | 68 | Oxidation+M(8)                           | TFHFIFYMIAGAKEK              | 279  | 15 | 3  | 25.25  | b3b4b10                                                                    | 1834.91 | 57.289  | 34630  | 3 | 612.31  | -3.86  |
| P35749 MYH11_HUMAN Myosin-11                | 69 | Oxidation+M()                            | ALETQMEEK                    | 1535 | 10 | 4  | 38.46  | b9y4y7y8                                                                   | 1225.54 | 31.935  | 7331   | 2 | 613.27  | -3.59  |
| P35749 MYH11_HUMAN Myosin-11                | 70 | Carbamidomethyl+C(12)<br>;Oxidation+M(6) | ITDVIMAFQAMCR                | 785  | 13 | 4  | 19.58  | b10°b10y3y12                                                               | 1571.75 | 68.121  | 5141   | 3 | 524.59  | 5.75   |
| P35749 MYH11_HUMAN Myosin-11                | 71 | Oxidation+M(10)                          | QELEEILHEMEAR                | 917  | 13 | 4  | 19.58  | b9y3°y3y11                                                                 | 1642.78 | 66.549  | 4068   | 3 | 548.27  | 6.17   |
| P35749 MYH11_HUMAN Myosin-11                | 72 | Oxidation+M(15)                          | LQRELDEATESNEAMGREVNALK      | 1902 | 23 | 4  | 12.44  | b6°b6b19y13                                                                | 2619.29 | 97.463  | 2683   | 3 | 873.77  | 7.36   |
| P35749 MYH11_HUMAN Myosin-11                | 73 |                                          | LEDEILVMDD                   | 982  | 10 | 0  | 4.05   |                                                                            | 1191.56 | 80.983  | 1574   | 1 | 1191.56 | 9.43   |
| P10720 PF4V_HUMAN Platelet factor 4 variant | 1  | Carbamidomethyl+C(5)                     | AGPHCPTAQLIATLK              | 65   | 15 | 15 | 128.88 | b4b5b7°b7b8b9b13b14y3y4°y4y5y7y11y15                                       | 1577.83 | 60.177  | 323805 | 3 | 526.61  | -10.68 |
| P10720 PF4V_HUMAN Platelet factor 4 variant | 2  |                                          | HITSLEVIK                    | 56   | 9  | 13 | 88.01  | b1b2b4°b4b5°b5b6b7y2y4y7y8y9                                               | 1039.61 | 47.186  | 291088 | 2 | 520.31  | -1.29  |
| P10720 PF4V_HUMAN Platelet factor 4 variant | 3  |                                          | SSAAR                        | 1    | 5  | 1  | 12.75  | y4                                                                         | 491.26  | 26.331  | 10901  | 1 | 491.26  | 7.08   |
| P10720 PF4V_HUMAN Platelet factor 4 variant | 4  |                                          | MSSAAR                       | 0    | 6  | 1  | 13.2   | b5                                                                         | 622.31  | 47.861  | 3093   | 1 | 622.31  | 14.71  |
| P10720 PF4V_HUMAN Platelet factor 4 variant | 5  | Carbamidomethyl+C(5)                     | AGPHCPTAQLIATLK              | 65   | 15 | 0  | 4.5    |                                                                            | 1560.79 | 60.144  | 4024   | 3 | 520.94  | -13.61 |
| P23528 COF1_HUMAN Cofilin-1                 | 1  |                                          | KEDLVFIFWAPESAPLK            | 95   | 17 | 8  | 66.72  | b5b6y3y4y7y8y9y17                                                          | 1990.05 | 96.708  | 224806 | 3 | 664.02  | -9.81  |
| P23528 COF1_HUMAN Cofilin-1                 | 2  |                                          | YALYDATYETK                  | 81   | 11 | 11 | 78.91  | b2b3b5y2y4°y4y7y8y9y10y11                                                  | 1337.63 | 51.706  | 163361 | 2 | 669.32  | 2.01   |
| P23528 COF1_HUMAN Cofilin-1                 | 3  |                                          | EILVGDVGQTVDDPYATFVK         | 53   | 20 | 27 | 166.47 | b2°b2b3°b3b4b6°b6b13b17°b17°b17y1y2y3y4y5y7y8y10y11y12y14*y14y15*y15y16y20 | 2166.11 | 80.389  | 145120 | 2 | 1083.56 | 4.17   |
| P23528 COF1_HUMAN Cofilin-1                 | 4  | Carbamidomethyl+C(5)                     | AVLFCLSEDKK                  | 34   | 11 | 9  | 71.39  | b2b3y2y3y5y7y8y9y11                                                        | 1309.67 | 56.741  | 129788 | 3 | 437.23  | -11.18 |
| P23528 COF1_HUMAN Cofilin-1                 | 5  |                                          | NIILEEGK                     | 45   | 8  | 6  | 39.59  | y2y3°y3y5y6y8                                                              | 915.51  | 43.458  | 76399  | 2 | 458.26  | -5.00  |
| P23528 COF1_HUMAN Cofilin-1                 | 6  |                                          | YALYDATYETKESK               | 81   | 14 | 3  | 18.27  | b4b8y8                                                                     | 1681.79 | 72.528  | 2753   | 3 | 561.27  | -2.61  |
| P23528 COF1_HUMAN Cofilin-1                 | 7  |                                          | LTGIK                        | 127  | 5  | 2  | 12.75  | b3°b3                                                                      | 531.35  | 42.593  | 23329  | 1 | 531.35  | -2.99  |
| P23528 COF1_HUMAN Cofilin-1                 | 8  | Carbamidomethyl+C(1)                     | CTLAEK                       | 146  | 6  | 3  | 25.94  | y3y4°y4                                                                    | 721.36  | 55.970  | 5413   | 1 | 721.36  | 13.11  |
| P23528 COF1_HUMAN Cofilin-1                 | 9  |                                          | NIILEEGKEILVGDVGQTVDDPYATFVK | 45   | 28 | 3  | 11.33  | b3y9y13                                                                    | 3062.60 | 91.858  | 114991 | 3 | 1021.54 | 1.04   |
| P23528 COF1_HUMAN Cofilin-1                 | 10 |                                          | SKMIYASSK                    | 112  | 9  | 3  | 29.25  | b7b8y5                                                                     | 1014.54 | 26.378  | 13677  | 2 | 507.77  | 7.10   |
| P23528 COF1_HUMAN Cofilin-1                 | 11 | Carbamidomethyl+C(2)                     | DCRYALYDATYETK               | 78   | 14 | 3  | 18.27  | b10y7y12                                                                   | 1768.78 | 91.600  | 10689  | 3 | 590.27  | -0.97  |
| P23528 COF1_HUMAN Cofilin-1                 | 12 |                                          | MIYASSKDAIK                  | 114  | 11 | 3  | 30.14  | b4b7b8                                                                     | 1226.63 | 87.703  | 4917   | 2 | 613.82  | -9.65  |
| P23528 COF1_HUMAN Cofilin-1                 | 13 | Carbamidomethyl+C(7)                     | MLPDKDCR                     | 73   | 8  | 6  | 60.31  | b7y3y4y5y6°y6                                                              | 1034.47 | 19.709  | 3205   | 2 | 517.74  | -2.01  |
| P23528 COF1_HUMAN Cofilin-1                 | 14 |                                          | ASGVAVSDGVIKVFNDMK           | 1    | 18 | 6  | 27.84  | b3b4°b4y4y6*y6                                                             | 1836.93 | 83.191  | 2390   | 2 | 918.97  | -14.82 |
| P23528 COF1_HUMAN Cofilin-1                 | 15 | Carbamidomethyl+C(3)                     | LFCLSEDKK                    | 36   | 9  | 1  | 7.66   | b3                                                                         | 1139.58 | 56.722  | 64598  | 2 | 570.29  | -0.21  |

|                                             |    |                                                 |                                    |     |    |    |        |                                              |         |         |        |   |         |        |
|---------------------------------------------|----|-------------------------------------------------|------------------------------------|-----|----|----|--------|----------------------------------------------|---------|---------|--------|---|---------|--------|
| P23528 COF1_HUMAN Cofilin-1                 | 16 |                                                 | LYDATYETKESK                       | 83  | 12 | 1  | 7.25   | b6                                           | 1447.70 | 72.490  | 11187  | 2 | 724.35  | 1.43   |
| P23528 COF1_HUMAN Cofilin-1                 | 17 |                                                 | PESAPLK                            | 105 | 7  | 2  | 7.35   | b3°b3                                        | 741.41  | 96.692  | 4980   | 1 | 741.41  | -11.53 |
| P23528 COF1_HUMAN Cofilin-1                 | 18 |                                                 | EILVGDVGTVD                        | 53  | 13 | 0  | 6.75   |                                              | 1359.66 | 80.320  | 2134   | 2 | 680.33  | -4.76  |
| Q86UX7 URP2_HUMAN Fermitin family homolog 3 | 1  |                                                 | VVLAGGVAPALFR                      | 166 | 13 | 12 | 95.76  | b2b3b4b6y2y5y6y8y9y10y11y13                  | 1269.77 | 76.815  | 212826 | 2 | 635.39  | -0.58  |
| Q86UX7 URP2_HUMAN Fermitin family homolog 3 | 2  |                                                 | LLVPSPEGMSEIYLR                    | 423 | 15 | 9  | 49.97  | b2b3b13y1y3y6y10y12y15                       | 1703.91 | 84.832  | 148361 | 2 | 852.46  | 2.79   |
| Q86UX7 URP2_HUMAN Fermitin family homolog 3 | 3  | Carbamidomethyl+C(15)                           | ASFSQPLFQAVAAICR                   | 113 | 16 | 14 | 115.79 | b4°b4b5b14y2y3y4y5y6y7y8y9y11y16             | 1765.91 | 90.833  | 99085  | 2 | 883.46  | 0.90   |
| Q86UX7 URP2_HUMAN Fermitin family homolog 3 | 4  |                                                 | ILEAHQNVAQLSLAEALQR                | 523 | 19 | 13 | 90.6   | b7b8°b8b9b16y1y4y5y6*y6y7y8y19               | 2104.14 | 65.126  | 98825  | 3 | 702.05  | -7.08  |
| Q86UX7 URP2_HUMAN Fermitin family homolog 3 | 5  | Carbamidomethyl+C(2)                            | GCEVVPDVNVSGQK                     | 405 | 14 | 18 | 121.7  | b2b3b4b9b11y2*y2y3*y3y4*y4y6*y6y8y9y10y12y14 | 1487.73 | 47.080  | 38467  | 2 | 744.37  | 8.21   |
| Q86UX7 URP2_HUMAN Fermitin family homolog 3 | 6  |                                                 | VFVGEDPEAESVTLR                    | 19  | 16 | 5  | 33.68  | y2y7y10y11y14                                | 1776.88 | 59.343  | 31065  | 2 | 888.94  | 7.14   |
| Q86UX7 URP2_HUMAN Fermitin family homolog 3 | 7  |                                                 | TMADSSYTSEVQAILAFLSLQR             | 459 | 22 | 11 | 64.94  | b2b3b14y2y4*y4y5y6y7y8y22                    | 2431.22 | 119.277 | 28468  | 2 | 1216.12 | 3.01   |
| Q86UX7 URP2_HUMAN Fermitin family homolog 3 | 8  |                                                 | FIQAWQSLPDFGISYVMVR                | 542 | 19 | 8  | 46.91  | b8b12b14°b14y6y11y13y16                      | 2257.13 | 103.898 | 10676  | 3 | 753.05  | -9.09  |
| Q86UX7 URP2_HUMAN Fermitin family homolog 3 | 9  |                                                 | LSQSGEVGEPAGTDPGLDDLDVA LSNLEVK    | 303 | 30 | 7  | 34.35  | b7°b7b11b12b13*b13y13                        | 3025.48 | 116.609 | 2207   | 3 | 1009.17 | -0.81  |
| Q86UX7 URP2_HUMAN Fermitin family homolog 3 | 10 | Carbamidomethyl+C(15)                           | GMPAHFSDSAQTEACYHMLSRPQ PPPDPLLLQR | 179 | 33 | 5  | 23.46  | b27y3y4y6y22                                 | 3747.76 | 69.084  | 199854 | 5 | 750.36  | -5.08  |
| Q86UX7 URP2_HUMAN Fermitin family homolog 3 | 11 |                                                 | TGSGGPGNHPHGPDAEGLNPY GLVAPR       | 481 | 29 | 15 | 114.11 | b8*b8b9b12b14b21y3y4y5y6y7y8y9y11y15         | 2782.31 | 58.647  | 116048 | 4 | 696.33  | -6.58  |
| Q86UX7 URP2_HUMAN Fermitin family homolog 3 | 12 |                                                 | LEGSAPTDVLDLSLTIPELK               | 333 | 20 | 4  | 13.63  | b4b16°b16y4                                  | 2099.12 | 94.314  | 32233  | 2 | 1050.06 | 2.68   |
| Q86UX7 URP2_HUMAN Fermitin family homolog 3 | 13 | Carbamidomethyl+C(16)<br>;Carbamidomethyl+C(21) | QVAIEFDEHINVAFCVCSASCR             | 607 | 22 | 4  | 21.54  | b18y4°y4y5                                   | 2539.15 | 80.620  | 31411  | 3 | 847.06  | -7.69  |
| Q86UX7 URP2_HUMAN Fermitin family homolog 3 | 14 |                                                 | GEELDEDLFLQLTGGHEAF                | 648 | 19 | 3  | 21.11  | y4y11y13                                     | 2120.02 | 80.636  | 12291  | 3 | 707.35  | 19.46  |
| Q86UX7 URP2_HUMAN Fermitin family homolog 3 | 15 | Carbamidomethyl+C(5)                            | WMAGCR                             | 447 | 6  | 2  | 25.94  | y4y5                                         | 780.33  | 29.474  | 8166   | 2 | 390.67  | 2.42   |
| Q86UX7 URP2_HUMAN Fermitin family homolog 3 | 16 |                                                 | LTLK                               | 367 | 4  | 2  | 12.3   | b3°b3                                        | 474.33  | 68.551  | 6476   | 1 | 474.33  | 2.51   |
| Q86UX7 URP2_HUMAN Fermitin family homolog 3 | 17 |                                                 | YYSFFDLDPK                         | 252 | 10 | 6  | 50.42  | b4b6b7y6y8°y8                                | 1294.58 | 28.756  | 5018   | 2 | 647.80  | -11.98 |
| Q86UX7 URP2_HUMAN Fermitin family homolog 3 | 18 |                                                 | QWLLQTHWTLDK                       | 70  | 12 | 3  | 21.17  | b3b8y7                                       | 1568.79 | 40.679  | 3020   | 3 | 523.60  | -21.79 |
| Q86UX7 URP2_HUMAN Fermitin family homolog 3 | 19 |                                                 | HPEELSLR                           | 134 | 9  | 4  | 43.75  | b3b5b6y8                                     | 1093.58 | 25.306  | 2018   | 2 | 547.30  | -13.84 |
| Q86UX7 URP2_HUMAN Fermitin family homolog 3 | 20 |                                                 | LPRPSSLSDKTQLHSR                   | 212 | 16 | 3  | 23.94  | y3y6y8                                       | 1821.97 | 35.601  | 73992  | 4 | 456.25  | -13.00 |
| Q86UX7 URP2_HUMAN Fermitin family homolog 3 | 21 | Carbamidomethyl+C(18)                           | SQDEAPGDPIQLNLKCEVVDPD VNVSGQK     | 389 | 30 | 5  | 24.02  | b14b15y4*y4y12                               | 3221.58 | 79.296  | 54914  | 3 | 1074.53 | 1.52   |
| Q86UX7 URP2_HUMAN Fermitin family homolog 3 | 22 |                                                 | ARGEELDEDLFLQLTGGHEAF              | 646 | 21 | 8  | 54.42  | b5°b5b6b7b9b10b12y13                         | 2347.11 | 93.994  | 34873  | 3 | 783.04  | -4.47  |
| Q86UX7 URP2_HUMAN Fermitin family homolog 3 | 23 | Carbamidomethyl+C(1)                            | CLMQQGIKAGDALWLR                   | 234 | 16 | 5  | 26.27  | b8b10b15y8°y8                                | 1859.96 | 79.262  | 21236  | 2 | 930.48  | -0.79  |
| Q86UX7 URP2_HUMAN Fermitin family homolog 3 | 24 |                                                 | TQLHSRWLDSSR                       | 222 | 12 | 3  | 21.17  | b6b9y8                                       | 1485.77 | 61.064  | 10886  | 2 | 743.39  | 12.08  |
| Q86UX7 URP2_HUMAN Fermitin family homolog 3 | 25 |                                                 | MAGMKTASGDYIDSSWELR                | 0   | 19 | 9  | 68.49  | b3y6y7°y7y8y10y11y12°y12                     | 2117.98 | 107.271 | 6497   | 2 | 1059.49 | 7.72   |
| Q86UX7 URP2_HUMAN Fermitin family homolog 3 | 26 |                                                 | DVNVSGQK                           | 411 | 8  | 0  | 4.05   |                                              | 846.44  | 47.148  | 6861   | 1 | 846.44  | 12.04  |

|                                              |    |                       |                                |     |    |    |       |                                           |         |         |        |   |         |        |
|----------------------------------------------|----|-----------------------|--------------------------------|-----|----|----|-------|-------------------------------------------|---------|---------|--------|---|---------|--------|
| [Q86UX7]URP2_HUMAN Fermitin family homolog 3 | 27 |                       | LSQSGEVGEPA GTDPGLDDLDVAL      | 303 | 24 | 4  | 12.33 | y10°y10y12°y12                            | 2355.13 | 116.664 | 4298   | 3 | 785.71  | 3.52   |
| [Q86UX7]URP2_HUMAN Fermitin family homolog 3 | 28 |                       | LAGGVAPALFR                    | 168 | 11 | 0  | 3.6   |                                           | 1071.62 | 76.834  | 1654   | 2 | 536.31  | -12.99 |
| [P06733]ENO_A_HUMAN Alpha-enolase            | 1  |                       | YISPDQLADLYK                   | 269 | 12 | 8  | 42.11 | b2b3b5y5y9y10°y10y12                      | 1425.73 | 72.492  | 80327  | 2 | 713.37  | 0.60   |
| [P06733]ENO_A_HUMAN Alpha-enolase            | 2  |                       | HIADLAGNSEVILPVPAFNVINGGSHAGNK | 132 | 30 | 14 | 81.86 | b2b5b6b7b8b11b12y2y10y12y15*y15y17y18     | 3011.54 | 83.848  | 70680  | 4 | 753.64  | -8.92  |
| [P06733]ENO_A_HUMAN Alpha-enolase            | 3  |                       | SFIKDYPVVSIEDPFDQDDWGA WQK     | 281 | 25 | 11 | 53.52 | b2b6b7b8b13y2y5y9y12y13y25                | 2985.39 | 94.487  | 54034  | 3 | 995.80  | -0.65  |
| [P06733]ENO_A_HUMAN Alpha-enolase            | 4  |                       | TIAPALVSK                      | 71  | 9  | 7  | 37.03 | b1b2y2y4y6y7y9                            | 899.55  | 43.543  | 51050  | 2 | 450.28  | -3.12  |
| [P06733]ENO_A_HUMAN Alpha-enolase            | 5  | Carbamidomethyl+C(14) | VNQIGSVTESLQACK                | 343 | 15 | 7  | 42    | b10b15y3y10y11y12y15                      | 1633.82 | 53.472  | 49276  | 2 | 817.42  | 1.79   |
| [P06733]ENO_A_HUMAN Alpha-enolase            | 6  |                       | AAVPSGASTGIYEALELR             | 32  | 18 | 6  | 25.28 | b12°b12y7y14y15y18                        | 1804.95 | 77.739  | 46236  | 2 | 902.98  | 5.55   |
| [P06733]ENO_A_HUMAN Alpha-enolase            | 7  |                       | LAMQEFMILPVGAANFR              | 162 | 17 | 15 | 51.06 | b5b6°b6*b6b14°b14y1y2y6*y6y8y12y13y17*y17 | 1907.99 | 99.404  | 43484  | 2 | 954.50  | 0.83   |
| [P06733]ENO_A_HUMAN Alpha-enolase            | 8  |                       | DATNVGDEGGFAPNILENKEGLEL LK    | 202 | 26 | 7  | 17.34 | b2b5y2y3y14y21y26                         | 2743.36 | 83.837  | 33495  | 3 | 915.13  | -5.07  |
| [P06733]ENO_A_HUMAN Alpha-enolase            | 9  |                       | IGAEVYHNLK                     | 183 | 10 | 5  | 50.22 | y3y4y5y7y10                               | 1143.62 | 38.299  | 24712  | 2 | 572.31  | 3.95   |
| [P06733]ENO_A_HUMAN Alpha-enolase            | 10 |                       | DYPVVSIEDPFDQDDWGA WQK         | 285 | 21 | 9  | 35.46 | b2b4b6b8y3y7°y7y8y21                      | 2510.12 | 95.338  | 7646   | 2 | 1255.57 | 3.60   |
| [P06733]ENO_A_HUMAN Alpha-enolase            | 11 |                       | LNVTEQEK                       | 81  | 8  | 7  | 62.07 | b2b6b7y4y6°y6y7                           | 960.49  | 28.810  | 5173   | 2 | 480.75  | -10.36 |
| [P06733]ENO_A_HUMAN Alpha-enolase            | 12 |                       | GNPTVEVDLFTSK                  | 15  | 13 | 5  | 39.81 | b3b5b6b11*b11                             | 1406.72 | 85.779  | 3586   | 2 | 703.87  | 4.60   |
| [P06733]ENO_A_HUMAN Alpha-enolase            | 13 |                       | LAQANGWGVMSHR                  | 358 | 14 | 7  | 77.71 | b5y3y4y6y7y11y12                          | 1525.74 | 54.309  | 49174  | 3 | 509.25  | -18.32 |
| [P06733]ENO_A_HUMAN Alpha-enolase            | 14 |                       | FTASAGIQVVGDDLTVTNPK           | 306 | 20 | 3  | 13.63 | b6b9y3                                    | 2033.09 | 105.157 | 39625  | 2 | 1017.05 | 15.07  |
| [P06733]ENO_A_HUMAN Alpha-enolase            | 15 |                       | DATNVGDEGGFAPNILENK            | 202 | 19 | 3  | 14.15 | b3b11y11                                  | 1960.94 | 40.551  | 11038  | 3 | 654.32  | 8.65   |
| [P06733]ENO_A_HUMAN Alpha-enolase            | 16 |                       | AGYTDK                         | 233 | 6  | 2  | 25.94 | b3b4                                      | 654.30  | 30.239  | 7410   | 1 | 654.30  | -9.79  |
| [P06733]ENO_A_HUMAN Alpha-enolase            | 17 |                       | EIFDSR                         | 9   | 6  | 1  | 13.2  | y3                                        | 766.38  | 28.798  | 4817   | 1 | 766.38  | 11.07  |
| [P06733]ENO_A_HUMAN Alpha-enolase            | 18 |                       | SPDDPSRYISPDQLADLYK            | 262 | 19 | 4  | 19.44 | b9b14y8y17                                | 2180.07 | 65.037  | 8271   | 3 | 727.36  | 7.06   |
| [P06733]ENO_A_HUMAN Alpha-enolase            | 19 |                       | SGKYDLDFK                      | 253 | 9  | 8  | 76.52 | b3b5°b5b7b8y5y7°y7                        | 1072.53 | 45.956  | 8015   | 2 | 536.77  | -4.44  |
| [P06733]ENO_A_HUMAN Alpha-enolase            | 20 |                       | LMIEMDGTENKSK                  | 92  | 13 | 5  | 27.06 | y5°y5y6y8°y8                              | 1495.72 | 37.405  | 3721   | 2 | 748.36  | 3.75   |
| [P06733]ENO_A_HUMAN Alpha-enolase            | 21 |                       | IHAREIFDSR                     | 5   | 10 | 4  | 25.72 | b4y6y9°y9                                 | 1243.65 | 60.071  | 3168   | 2 | 622.33  | -5.50  |
| [P06733]ENO_A_HUMAN Alpha-enolase            | 22 | Carbamidomethyl+C(14) | VNQIGSVTESLQACKLAQANGWGVMSHR   | 343 | 29 | 4  | 13.71 | b7b11y6y8                                 | 3140.54 | 106.458 | 2696   | 4 | 785.89  | -11.97 |
| [P06733]ENO_A_HUMAN Alpha-enolase            | 23 | Phosphoryl STY(11)    | YISPDQLADLYK                   | 269 | 12 | 6  | 45.12 | b5°b5b9y3y6y8                             | 1505.70 | 22.271  | 1936   | 3 | 502.57  | 14.11  |
| [P06733]ENO_A_HUMAN Alpha-enolase            | 24 | Oxidation+M(7)        | LAMQEFMILPVGAANFREAMR          | 162 | 21 | 4  | 26.21 | b4b8y9y10                                 | 2411.21 | 42.460  | 149054 | 4 | 603.56  | 2.13   |
| [P06733]ENO_A_HUMAN Alpha-enolase            | 25 |                       | APALVSK                        | 73  | 7  | 2  | 22.52 | b3b4                                      | 685.43  | 43.533  | 7904   | 1 | 685.43  | 2.49   |
| [P06733]ENO_A_HUMAN Alpha-enolase            | 26 |                       | NSEVILPVPAFNVINGGSHAGNK        | 139 | 23 | 1  | 10.01 | b4                                        | 2334.19 | 83.787  | 6969   | 3 | 778.74  | -11.92 |

|                                          |    |                                            |                               |     |    |    |        |                                 |         |         |        |   |         |        |
|------------------------------------------|----|--------------------------------------------|-------------------------------|-----|----|----|--------|---------------------------------|---------|---------|--------|---|---------|--------|
| P06733 ENOA_HUMAN Alpha-enolase          | 27 |                                            | PVPAFNVINGGSHAGNK             | 145 | 17 | 0  | 11.24  |                                 | 1678.85 | 83.813  | 2813   | 2 | 839.93  | -8.94  |
| P07437 TBB5_HUMAN Tubulin beta chain     | 1  |                                            | LAVNMVPPFR                    | 252 | 10 | 14 | 109.18 | b2b3b5*b5y1y3y4y5y6y7y8y9*y9y10 | 1143.63 | 71.952  | 238985 | 2 | 572.32  | -5.12  |
| P07437 TBB5_HUMAN Tubulin beta chain     | 2  |                                            | SGPFGQIFRPDNFVFGQSGAGNN WAK   | 77  | 26 | 12 | 72.68  | b3b13b15y6y7*y7y8y9y11y12y21y26 | 2798.35 | 88.914  | 158922 | 3 | 933.45  | 1.66   |
| P07437 TBB5_HUMAN Tubulin beta chain     | 3  |                                            | IMNTFSVVVPSPK                 | 162 | 12 | 6  | 47.64  | b3y5y7y8y9y12                   | 1319.71 | 62.942  | 110098 | 2 | 660.36  | 2.50   |
| P07437 TBB5_HUMAN Tubulin beta chain     | 4  |                                            | ALTVPQLTQQVFDK                | 282 | 15 | 7  | 28     | b3*b3y6*y6y8y11y15              | 1659.90 | 83.388  | 91039  | 2 | 830.45  | 1.54   |
| P07437 TBB5_HUMAN Tubulin beta chain     | 5  | Carbamidomethyl+C(23)                      | LTTPTYGDLNHLVSATMSGVTTCLR     | 216 | 25 | 12 | 109.51 | y2y3y4y5y7y8y9y10y12y13y14y25   | 2708.33 | 94.631  | 70860  | 3 | 903.45  | -2.70  |
| P07437 TBB5_HUMAN Tubulin beta chain     | 6  | Carbamidomethyl+C(10)                      | EIVHIQAGQCGNQIGAK             | 2   | 17 | 7  | 42.77  | b2b4*b4y7y8y11y12               | 1822.91 | 42.608  | 67345  | 3 | 608.31  | -6.56  |
| P07437 TBB5_HUMAN Tubulin beta chain     | 7  |                                            | MAVTFIGNSTAIQELFKR            | 362 | 18 | 9  | 30.97  | b3b9y1y2y12*y12y13y15y18        | 2026.06 | 90.247  | 63431  | 3 | 676.03  | -7.95  |
| P07437 TBB5_HUMAN Tubulin beta chain     | 8  | Carbamidomethyl+C(5); Carbamidomethyl+C(7) | EAESCDLQGFQLTHSLGGGTSGMGTLISK | 122 | 32 | 4  | 22.6   | y3y4y7y32                       | 3311.56 | 81.000  | 50613  | 3 | 1104.52 | 7.08   |
| P07437 TBB5_HUMAN Tubulin beta chain     | 9  |                                            | IREEYPDR                      | 154 | 8  | 10 | 65.08  | b2b4b5*b5b7y1y2*y2y3y5          | 1077.53 | 23.392  | 42843  | 2 | 539.27  | -0.34  |
| P07437 TBB5_HUMAN Tubulin beta chain     | 10 |                                            | GHYTEGAELVDSVLDVVRK           | 103 | 19 | 5  | 22.39  | b4b7*b7b13y4                    | 2087.07 | 86.255  | 39743  | 3 | 696.36  | -4.21  |
| P07437 TBB5_HUMAN Tubulin beta chain     | 11 |                                            | ISVYYNEATGGK                  | 46  | 12 | 5  | 31.39  | y3y8*y8y10y12                   | 1301.64 | 43.935  | 33002  | 2 | 651.32  | 0.19   |
| P07437 TBB5_HUMAN Tubulin beta chain     | 12 |                                            | ISEQFTAMFRR                   | 380 | 11 | 11 | 68.38  | b2b3b4*b4b5*b5b6b9y10y11*y11    | 1385.71 | 57.850  | 7991   | 2 | 693.36  | 9.51   |
| P07437 TBB5_HUMAN Tubulin beta chain     | 13 |                                            | LHFFMPGFAPLTSR                | 262 | 14 | 3  | 18.27  | b12y3y12                        | 1620.83 | 112.804 | 1500   | 2 | 810.92  | -2.64  |
| P07437 TBB5_HUMAN Tubulin beta chain     | 14 |                                            | MAVTFIGNSTAIQELFK             | 362 | 17 | 5  | 21.57  | b3b6y5*y5y12                    | 1869.98 | 97.597  | 7852   | 2 | 935.49  | 0.98   |
| P07437 TBB5_HUMAN Tubulin beta chain     | 15 |                                            | ISEQFTAMFRR                   | 380 | 11 | 5  | 36.69  | b5b8*b8y4y5                     | 1385.69 | 34.492  | 26629  | 3 | 462.57  | -4.40  |
| P07437 TBB5_HUMAN Tubulin beta chain     | 16 |                                            | GHYTEGAELVDSVLDVVRK           | 103 | 19 | 3  | 21.11  | b5b10b14                        | 2087.08 | 95.009  | 7151   | 3 | 696.36  | 0.70   |
| P07437 TBB5_HUMAN Tubulin beta chain     | 17 | Phosphoryl STY(16)                         | FWEVISDEHGIDPTGYHGSDSLQLDR    | 19  | 27 | 4  | 14.43  | b3b14y9y11                      | 3182.37 | 90.346  | 2227   | 3 | 1061.46 | 1.38   |
| P07437 TBB5_HUMAN Tubulin beta chain     | 18 | Phosphoryl STY()                           | MAVTFIGNSTAIQELFKR            | 362 | 18 | 4  | 14.75  | b4b8y10*y10                     | 2106.06 | 136.359 | 1520   | 2 | 1053.53 | 9.27   |
| P07437 TBB5_HUMAN Tubulin beta chain     | 19 |                                            | MAVTFIGNSTAIQELF              | 362 | 16 | 1  | 7.45   | y7                              | 1741.86 | 90.311  | 7927   | 2 | 871.43  | -12.96 |
| Q9BVA1 TBB2B_HUMAN Tubulin beta-2B chain | 1  |                                            | LAVNMVPPFR                    | 252 | 10 | 14 | 109.18 | b2b3b5*b5y1y3y4y5y6y7y8y9*y9y10 | 1143.63 | 71.952  | 238985 | 2 | 572.32  | -5.12  |
| Q9BVA1 TBB2B_HUMAN Tubulin beta-2B chain | 2  |                                            | SGPFGQIFRPDNFVFGQSGAGNN WAK   | 77  | 26 | 12 | 72.68  | b3b13b15y6y7*y7y8y9y11y12y21y26 | 2798.35 | 88.914  | 158922 | 3 | 933.45  | 1.66   |
| Q9BVA1 TBB2B_HUMAN Tubulin beta-2B chain | 3  | Carbamidomethyl+C(23)                      | LTTPTYGDLNHLVSATMSGVTTCLR     | 216 | 25 | 12 | 109.51 | y2y3y4y5y7y8y9y10y12y13y14y25   | 2708.33 | 94.631  | 70860  | 3 | 903.45  | -2.70  |
| Q9BVA1 TBB2B_HUMAN Tubulin beta-2B chain | 4  | Carbamidomethyl+C(10)                      | EIVHIQAGQCGNQIGAK             | 2   | 17 | 7  | 42.77  | b2b4*b4y7y8y11y12               | 1822.91 | 42.608  | 67345  | 3 | 608.31  | -6.56  |
| Q9BVA1 TBB2B_HUMAN Tubulin beta-2B chain | 5  |                                            | IREEYPDR                      | 154 | 8  | 10 | 65.08  | b2b4b5*b5b7y1y2*y2y3y5          | 1077.53 | 23.392  | 42843  | 2 | 539.27  | -0.34  |
| Q9BVA1 TBB2B_HUMAN Tubulin beta-2B chain | 6  |                                            | GHYTEGAELVDSVLDVVRK           | 103 | 19 | 5  | 22.39  | b4b7*b7b13y4                    | 2087.07 | 86.255  | 39743  | 3 | 696.36  | -4.21  |
| Q9BVA1 TBB2B_HUMAN Tubulin beta-2B chain | 7  |                                            | ISEQFTAMFRR                   | 380 | 11 | 11 | 68.38  | b2b3b4*b4b5*b5b6b9y10y11*y11    | 1385.71 | 57.850  | 7991   | 2 | 693.36  | 9.51   |
| Q9BVA1 TBB2B_HUMAN Tubulin beta-2B chain | 8  |                                            | INVYYNEATGNK                  | 46  | 12 | 4  | 32.67  | b6b7b9y8                        | 1385.69 | 63.632  | 3893   | 3 | 462.57  | 11.98  |
| Q9BVA1 TBB2B_HUMAN Tubulin beta-2B chain | 9  |                                            | ALTVPQLTQQMFDK                | 282 | 15 | 6  | 28     | b2b9y6y12*y12y13                | 1707.86 | 67.270  | 3241   | 3 | 569.96  | -3.36  |

|                                          |    |                                            |                                   |     |    |    |        |                                 |         |         |        |   |         |        |
|------------------------------------------|----|--------------------------------------------|-----------------------------------|-----|----|----|--------|---------------------------------|---------|---------|--------|---|---------|--------|
| Q9BVA1 TBB2B_HUMAN Tubulin beta-2B chain | 10 |                                            | LHFFMPGFAPLTSR                    | 262 | 14 | 3  | 18.27  | b12y3y12                        | 1620.83 | 112.804 | 1500   | 2 | 810.92  | -2.64  |
| Q9BVA1 TBB2B_HUMAN Tubulin beta-2B chain | 11 |                                            | AILVDLEPGTMDSVR                   | 62  | 15 | 6  | 28     | b9y4*y4y9*y9y10                 | 1615.85 | 63.184  | 13875  | 2 | 808.43  | 11.33  |
| Q9BVA1 TBB2B_HUMAN Tubulin beta-2B chain | 12 |                                            | GLKMSATFIGNSTAIQELFK              | 359 | 20 | 3  | 20.42  | b6b10b12                        | 2156.13 | 136.395 | 22778  | 3 | 719.38  | -3.51  |
| Q9BVA1 TBB2B_HUMAN Tubulin beta-2B chain | 13 |                                            | GSQQYRALTVPILTQQMFDSK             | 276 | 21 | 3  | 13.18  | b9b11y9                         | 2427.16 | 58.484  | 6244   | 3 | 809.73  | -14.08 |
| Q9BVA1 TBB2B_HUMAN Tubulin beta-2B chain | 14 |                                            | INVYYNEATGNKYVPR                  | 46  | 16 | 10 | 66.21  | b5b10*b10b12y3y10y12y14*y14y15  | 1900.93 | 68.631  | 3904   | 3 | 634.31  | -13.74 |
| Q9BVA1 TBB2B_HUMAN Tubulin beta-2B chain | 15 | Oxidation+M()                              | IMNTFSVMPSPK                      | 162 | 12 | 3  | 21.17  | b3b6y7                          | 1367.65 | 136.308 | 2013   | 1 | 1367.65 | -13.57 |
| Q13885 TBB2A_HUMAN Tubulin beta-2A chain | 1  |                                            | LAVNMVPPFR                        | 252 | 10 | 14 | 109.18 | b2b3b5*b5y1y3y4y5y6y7y8y9*y9y10 | 1143.63 | 71.952  | 238985 | 2 | 572.32  | -5.12  |
| Q13885 TBB2A_HUMAN Tubulin beta-2A chain | 2  |                                            | SGPFGQIFRPDNFVFGQSGAGNN WAK       | 77  | 26 | 12 | 72.68  | b3b13b15y6y7*y7y8y9y11y12y21y26 | 2798.35 | 88.914  | 158922 | 3 | 933.45  | 1.66   |
| Q13885 TBB2A_HUMAN Tubulin beta-2A chain | 3  | Carbamidomethyl+C(23)                      | LTTPTYGDLNHLVSATMSGVTTC LR        | 216 | 25 | 12 | 109.51 | y2y3y4y5y7y8y9y10y12y13y14y25   | 2708.33 | 94.631  | 70860  | 3 | 903.45  | -2.70  |
| Q13885 TBB2A_HUMAN Tubulin beta-2A chain | 4  | Carbamidomethyl+C(10)                      | EIVHIQAGQCGNQIGAK                 | 2   | 17 | 7  | 42.77  | b2b4*b4y7y8y11y12               | 1822.91 | 42.608  | 67345  | 3 | 608.31  | -6.56  |
| Q13885 TBB2A_HUMAN Tubulin beta-2A chain | 5  |                                            | IREEYPDR                          | 154 | 8  | 10 | 65.08  | b2b4b5*b5b7y1y2*y2y3y5          | 1077.53 | 23.392  | 42843  | 2 | 539.27  | -0.34  |
| Q13885 TBB2A_HUMAN Tubulin beta-2A chain | 6  |                                            | GHYTEGAELVDSVLDVVRK               | 103 | 19 | 5  | 22.39  | b4b7*b7b13y4                    | 2087.07 | 86.255  | 39743  | 3 | 696.36  | -4.21  |
| Q13885 TBB2A_HUMAN Tubulin beta-2A chain | 7  |                                            | ISEQFTAMFRR                       | 380 | 11 | 11 | 68.38  | b2b3b4*b4b5*b5b6b9y10y11*y11    | 1385.71 | 57.850  | 7991   | 2 | 693.36  | 9.51   |
| Q13885 TBB2A_HUMAN Tubulin beta-2A chain | 8  |                                            | INVYYNEAAGNK                      | 46  | 12 | 5  | 28.38  | y8y10y11*y11y12                 | 1355.66 | 43.015  | 4438   | 2 | 678.33  | -1.62  |
| Q13885 TBB2A_HUMAN Tubulin beta-2A chain | 9  |                                            | ALTVPELTQQMFDSK                   | 282 | 15 | 6  | 28     | b2b9y6y12*y12y13                | 1707.86 | 67.270  | 3241   | 3 | 569.96  | -3.36  |
| Q13885 TBB2A_HUMAN Tubulin beta-2A chain | 10 |                                            | LHFFMPGFAPLTSR                    | 262 | 14 | 3  | 18.27  | b12y3y12                        | 1620.83 | 112.804 | 1500   | 2 | 810.92  | -2.64  |
| P68371 TBB2C_HUMAN Tubulin beta-2C chain | 1  |                                            | LAVNMVPPFR                        | 252 | 10 | 14 | 109.18 | b2b3b5*b5y1y3y4y5y6y7y8y9*y9y10 | 1143.63 | 71.952  | 238985 | 2 | 572.32  | -5.12  |
| P68371 TBB2C_HUMAN Tubulin beta-2C chain | 2  |                                            | SGPFGQIFRPDNFVFGQSGAGNN WAK       | 77  | 26 | 12 | 72.68  | b3b13b15y6y7*y7y8y9y11y12y21y26 | 2798.35 | 88.914  | 158922 | 3 | 933.45  | 1.66   |
| P68371 TBB2C_HUMAN Tubulin beta-2C chain | 3  |                                            | IMNTFSVMPSPK                      | 162 | 12 | 6  | 47.64  | b3y5y7y8y9y12                   | 1319.71 | 62.942  | 110098 | 2 | 660.36  | 2.50   |
| P68371 TBB2C_HUMAN Tubulin beta-2C chain | 4  | Carbamidomethyl+C(23)                      | LTTPTYGDLNHLVSATMSGVTTC LR        | 216 | 25 | 12 | 109.51 | y2y3y4y5y7y8y9y10y12y13y14y25   | 2708.33 | 94.631  | 70860  | 3 | 903.45  | -2.70  |
| P68371 TBB2C_HUMAN Tubulin beta-2C chain | 5  | Carbamidomethyl+C(5); Carbamidomethyl+C(7) | EAESCDCLQGFQLTHSLGGGTGS GMGTLLISK | 122 | 32 | 4  | 22.6   | y3y4y7y32                       | 3311.56 | 81.000  | 50613  | 3 | 1104.52 | 7.08   |
| P68371 TBB2C_HUMAN Tubulin beta-2C chain | 6  |                                            | AVLVDLEPGTMDSVR                   | 62  | 15 | 8  | 35.18  | b2b3b11y2y8y9y11y15             | 1601.81 | 70.193  | 49736  | 2 | 801.41  | -3.81  |
| P68371 TBB2C_HUMAN Tubulin beta-2C chain | 7  |                                            | IREEYPDR                          | 154 | 8  | 10 | 65.08  | b2b4b5*b5b7y1y2*y2y3y5          | 1077.53 | 23.392  | 42843  | 2 | 539.27  | -0.34  |
| P68371 TBB2C_HUMAN Tubulin beta-2C chain | 8  |                                            | GHYTEGAELVDSVLDVVRK               | 103 | 19 | 5  | 22.39  | b4b7*b7b13y4                    | 2087.07 | 86.255  | 39743  | 3 | 696.36  | -4.21  |
| P68371 TBB2C_HUMAN Tubulin beta-2C chain | 9  |                                            | ALTVPELTQQMFDAK                   | 282 | 15 | 6  | 28     | b6b11b13*b13y1y11               | 1691.88 | 85.032  | 28221  | 2 | 846.44  | 5.41   |
| P68371 TBB2C_HUMAN Tubulin beta-2C chain | 10 |                                            | ISEQFTAMFRR                       | 380 | 11 | 11 | 68.38  | b2b3b4*b4b5*b5b6b9y10y11*y11    | 1385.71 | 57.850  | 7991   | 2 | 693.36  | 9.51   |
| P68371 TBB2C_HUMAN Tubulin beta-2C chain | 11 |                                            | LHFFMPGFAPLTSR                    | 262 | 14 | 3  | 18.27  | b12y3y12                        | 1620.83 | 112.804 | 1500   | 2 | 810.92  | -2.64  |
| P68371 TBB2C_HUMAN Tubulin beta-2C chain | 12 |                                            | INVYYNEATGGK                      | 46  | 12 | 3  | 21.17  | b9y6y9                          | 1328.66 | 43.828  | 17072  | 2 | 664.84  | 12.31  |

|                                          |    |                                                                  |                                            |     |    |    |        |                                                                                          |         |         |        |   |         |        |
|------------------------------------------|----|------------------------------------------------------------------|--------------------------------------------|-----|----|----|--------|------------------------------------------------------------------------------------------|---------|---------|--------|---|---------|--------|
| P68371 TBB2C_HUMAN Tubulin beta-2C chain | 13 | Carbamidomethyl+C(27);Carbamidomethyl+C(37);Phosphoryl STY()     | VSDTVVEPYNATLSVHQLVENTD<br>ETYPDNEALYDICFR | 174 | 39 | 10 | 44.34  | b3b7°b7b9°b9b10b12b14y<br>4y5                                                            | 4673.11 | 119.598 | 9448   | 4 | 1169.03 | 10.87  |
| P68371 TBB2C_HUMAN Tubulin beta-2C chain | 14 | Carbamidomethyl+C(12);Oxidation+M(1)                             | MREIVHLQAGQCGNQIGAK                        | 0   | 19 | 4  | 21.93  | b6°b6y9y10                                                                               | 2126.08 | 65.093  | 23210  | 3 | 709.36  | 7.35   |
| P02675 FIBB_HUMAN Fibrinogen beta chain  | 1  |                                                                  | DNENVVNEYSSELEK                            | 163 | 15 | 10 | 60.01  | b3b5b8y2°y2y8y9y10y13y1<br>5                                                             | 1768.79 | 59.299  | 172606 | 2 | 884.90  | 3.93   |
| P02675 FIBB_HUMAN Fibrinogen beta chain  | 2  | Carbamidomethyl+C(3);Carbamidomethyl+C(7)                        | TPCTVSCNIPVVSQK                            | 224 | 15 | 15 | 115.46 | b3b5°b5b9b11y1y3y4y6y1<br>0y11*y1y12y13y15                                               | 1618.80 | 50.606  | 172471 | 2 | 809.90  | 4.68   |
| P02675 FIBB_HUMAN Fibrinogen beta chain  | 3  | Carbamidomethyl+C(3)                                             | VYCDMNTENGWTVIQNR                          | 267 | 18 | 11 | 79.54  | b14b15y2y3*y3y4y5y6y13<br>y14y18                                                         | 2156.97 | 61.790  | 151567 | 2 | 1078.99 | 9.96   |
| P02675 FIBB_HUMAN Fibrinogen beta chain  | 4  |                                                                  | IRPFFPQQ                                   | 483 | 8  | 6  | 52.33  | b2b4b6y3*y3y6                                                                            | 1032.56 | 59.972  | 125493 | 2 | 516.78  | -5.20  |
| P02675 FIBB_HUMAN Fibrinogen beta chain  | 5  | Carbamidomethyl+C(2)                                             | ECEEIIR                                    | 239 | 7  | 10 | 51.88  | y1y2y3y4°y4y5°y5y6°y6y7                                                                  | 948.44  | 34.058  | 95101  | 2 | 474.72  | -4.05  |
| P02675 FIBB_HUMAN Fibrinogen beta chain  | 6  |                                                                  | EDGGGWYYNR                                 | 426 | 10 | 4  | 32.71  | y3y4y9y10                                                                                | 1239.53 | 61.209  | 76704  | 2 | 620.27  | 8.17   |
| P02675 FIBB_HUMAN Fibrinogen beta chain  | 7  |                                                                  | TMTIHNGMFFSTYDRDNDGWLTS<br>DPR             | 395 | 26 | 5  | 14.85  | b3b19y2y7y20                                                                             | 3077.34 | 76.270  | 61373  | 4 | 770.09  | -3.09  |
| P02675 FIBB_HUMAN Fibrinogen beta chain  | 8  |                                                                  | HGTDGDDVWWMNWK                             | 458 | 13 | 12 | 53.84  | b2b3b7b13°b13y2y4y5y6*<br>y6y9y13                                                        | 1544.71 | 70.244  | 60203  | 2 | 772.86  | 9.96   |
| P02675 FIBB_HUMAN Fibrinogen beta chain  | 9  |                                                                  | GGETSEMYLIQPDSSVKPYR                       | 247 | 20 | 10 | 50.2   | b2b3b10b11b12y1y4y11y1<br>3y20                                                           | 2257.09 | 61.115  | 58176  | 3 | 753.03  | 3.46   |
| P02675 FIBB_HUMAN Fibrinogen beta chain  | 10 | Carbamidomethyl+C(3)                                             | NYCGLPGEYWLGNCK                            | 313 | 15 | 3  | 25.25  | y3y4y7                                                                                   | 1785.82 | 73.957  | 57660  | 2 | 893.41  | 14.22  |
| P02675 FIBB_HUMAN Fibrinogen beta chain  | 11 |                                                                  | AHYGGFTVQNEANK                             | 353 | 14 | 8  | 37.07  | b2b3b7y6*y6y11y12y14                                                                     | 1535.73 | 37.810  | 34665  | 2 | 768.37  | 3.97   |
| P02675 FIBB_HUMAN Fibrinogen beta chain  | 12 | Carbamidomethyl+C(3);Carbamidomethyl+C(7);Carbamidomethyl+C(17)  | TPCTVSCNIPVVSQKCEEIIIR                     | 224 | 22 | 5  | 28.25  | y3y10y12y13y22                                                                           | 2548.23 | 60.561  | 26758  | 3 | 850.08  | 5.08   |
| P02675 FIBB_HUMAN Fibrinogen beta chain  | 13 |                                                                  | REEAPSLRPAPPISGGGYR                        | 52  | 20 | 6  | 26.32  | b4°b4b10y4y6y8                                                                           | 2107.10 | 47.227  | 16742  | 3 | 703.04  | -2.55  |
| P02675 FIBB_HUMAN Fibrinogen beta chain  | 14 |                                                                  | NSVDELNNNVEAVSQSSSSFY<br>MYLLK             | 124 | 28 | 15 | 98.56  | b2b3b10b11b23y4y6y9y10<br>y11y12y13y15y16y28                                             | 3167.50 | 88.483  | 16219  | 2 | 1584.25 | 4.78   |
| P02675 FIBB_HUMAN Fibrinogen beta chain  | 15 |                                                                  | QGFGNVATNTDGK                              | 300 | 13 | 8  | 60.25  | b4y3y6y7y8y11°y11y13                                                                     | 1308.63 | 35.053  | 15354  | 2 | 654.82  | 5.60   |
| P02675 FIBB_HUMAN Fibrinogen beta chain  | 16 |                                                                  | EEAPSLRPAPPISGGGYR                         | 53  | 19 | 11 | 79.32  | b9°b9y3y4y5y6°y6y8°y8y9<br>y10                                                           | 1951.02 | 50.987  | 22937  | 2 | 976.01  | 7.57   |
| P02675 FIBB_HUMAN Fibrinogen beta chain  | 17 | Carbamidomethyl+C(1)                                             | CHAANPNGR                                  | 436 | 9  | 4  | 37.03  | y5*y5y7y8                                                                                | 996.44  | 33.317  | 16312  | 2 | 498.72  | -2.76  |
| P02675 FIBB_HUMAN Fibrinogen beta chain  | 18 |                                                                  | YYWGGQYTWDMAK                              | 445 | 13 | 5  | 32.54  | b6y4y6y8*y8                                                                              | 1668.74 | 42.917  | 15937  | 3 | 556.92  | 13.97  |
| P02675 FIBB_HUMAN Fibrinogen beta chain  | 19 |                                                                  | DLWQK                                      | 152 | 5  | 1  | 12.75  | b4                                                                                       | 689.35  | 38.456  | 13317  | 1 | 689.35  | -11.42 |
| P02675 FIBB_HUMAN Fibrinogen beta chain  | 20 |                                                                  | GTAGNALMDGASQLMGENR                        | 376 | 19 | 6  | 21.93  | b6°b6b7*b7y3°y3                                                                          | 1892.82 | 49.603  | 7195   | 2 | 946.91  | -21.60 |
| P02675 FIBB_HUMAN Fibrinogen beta chain  | 21 | Carbamidomethyl+C(8);Carbamidomethyl+C(19);Carbamidomethyl+C(23) | KAPDAGGCLHADPDLGVLCTGC<br>QLQEALLQQRPIR    | 87  | 37 | 26 | 205.03 | b4b5b9b10b12b14b15b16b<br>17b18b19y3y4y10y11y12*<br>y12y14y15y18°y18y19°y19<br>y20y22y23 | 4083.97 | 78.137  | 321185 | 5 | 817.60  | -11.60 |
| P02675 FIBB_HUMAN Fibrinogen beta chain  | 22 |                                                                  | KGGETSEMYLIQPDSSVKPYR                      | 246 | 21 | 15 | 126.92 | b7b8b10b11°b11b12b13y3<br>y4y5y7y9y10*y10y11                                             | 2385.15 | 56.374  | 213159 | 4 | 597.04  | -12.69 |

|                                         |    |                                             |                                      |     |    |    |       |                                                 |         |         |        |   |         |        |
|-----------------------------------------|----|---------------------------------------------|--------------------------------------|-----|----|----|-------|-------------------------------------------------|---------|---------|--------|---|---------|--------|
| P02675 FIBB_HUMAN Fibrinogen beta chain | 23 |                                             | MGPTELLIEMEDWKGDK                    | 334 | 17 | 13 | 95.53 | b6°b6b7b10y3y5°y5y6°y6y8y11y12y15               | 1991.93 | 89.560  | 125563 | 3 | 664.65  | -9.56  |
| P02675 FIBB_HUMAN Fibrinogen beta chain | 24 |                                             | AHYGGFTVQNEANKYQISVVK                | 353 | 21 | 3  | 13.18 | b14y3y5                                         | 2368.13 | 52.855  | 120948 | 4 | 592.79  | -14.43 |
| P02675 FIBB_HUMAN Fibrinogen beta chain | 25 |                                             | NSVDELNNNVEAVSQTSSSFQYMYLLKDLWQK     | 124 | 33 | 7  | 23.46 | b3°b3b4b7b14°b14y11                             | 3837.81 | 116.635 | 106671 | 3 | 1279.94 | -5.66  |
| P02675 FIBB_HUMAN Fibrinogen beta chain | 26 | Carbamidomethyl+C(3)                        | NYCGLPGEYWLGNDKISQLTR                | 313 | 21 | 3  | 13.18 | b5b17y10                                        | 2484.20 | 78.825  | 58884  | 3 | 828.74  | 0.39   |
| P02675 FIBB_HUMAN Fibrinogen beta chain | 27 | Carbamidomethyl+C(16)                       | QGFQNVATNTDGKNYCGLPGEYWLGNDK         | 300 | 28 | 5  | 11.33 | b10b12°b12y13*y13                               | 3075.36 | 100.822 | 7074   | 2 | 1538.18 | -10.48 |
| P02675 FIBB_HUMAN Fibrinogen beta chain | 28 |                                             | QVKDNEVVNEYSSELEK                    | 160 | 18 | 12 | 56.69 | b5°b5b9°b9b10b12y4°y4y6y7°y7y10                 | 2123.99 | 107.279 | 6644   | 2 | 1062.50 | -10.12 |
| P02675 FIBB_HUMAN Fibrinogen beta chain | 29 | Carbamidomethyl+C(3)                        | VYCDMNTENGGWTVIQNRQDGSVDFGR          | 267 | 27 | 4  | 22.33 | y6°y6y7y9                                       | 3118.35 | 27.051  | 3131   | 3 | 1040.12 | -9.32  |
| P02675 FIBB_HUMAN Fibrinogen beta chain | 30 |                                             | YRGTAGNALMDGASQLMGENR                | 374 | 21 | 5  | 13.18 | b3b16°b16y15°y15                                | 2212.01 | 62.570  | 2850   | 3 | 738.01  | -6.18  |
| P02675 FIBB_HUMAN Fibrinogen beta chain | 31 |                                             | WDPYKQGFQNVATNTDGK                   | 295 | 18 | 4  | 14.75 | b9°b9b15y13                                     | 1997.93 | 44.916  | 1800   | 2 | 999.47  | -3.67  |
| P02675 FIBB_HUMAN Fibrinogen beta chain | 32 | Phosphoryl STY(15)                          | REEAPSLRPAPPISGGGYR                  | 52  | 20 | 5  | 24.04 | b5°b5y4_HPO3 y5_H3PO4 y4y5y13                   | 2187.06 | 57.877  | 4196   | 3 | 729.69  | -2.01  |
| P02675 FIBB_HUMAN Fibrinogen beta chain | 33 | Oxidation+M(24)                             | NSVDELNNNVEAVSQTSSSFQYMYLLK          | 124 | 28 | 3  | 11.33 | b8y11y13                                        | 3183.45 | 81.955  | 117171 | 4 | 796.62  | -10.05 |
| P02675 FIBB_HUMAN Fibrinogen beta chain | 34 | Oxidation+M(8)                              | TMTIHNGMFFSTYDRDNDGWLTS DPR          | 395 | 26 | 5  | 11.67 | b5y8°y8y13°y13                                  | 3093.35 | 117.503 | 19128  | 4 | 774.09  | 1.97   |
| P02675 FIBB_HUMAN Fibrinogen beta chain | 35 | Oxidation+M(1)                              | MGPTELLIEMEDWK                       | 334 | 14 | 7  | 37.07 | b3b10°b10y7°y7y12y13                            | 1707.81 | 68.710  | 5186   | 2 | 854.41  | 10.36  |
| P02675 FIBB_HUMAN Fibrinogen beta chain | 36 |                                             | REEAPSLRPAP                          | 52  | 11 | 1  | 7.73  | y3                                              | 1222.64 | 47.169  | 38155  | 2 | 611.83  | -8.19  |
| P02675 FIBB_HUMAN Fibrinogen beta chain | 37 |                                             | AVSQTSSSFQYMYLLK                     | 135 | 17 | 2  | 22.41 | b13b14                                          | 1939.96 | 88.545  | 1768   | 4 | 485.75  | 8.18   |
| P02675 FIBB_HUMAN Fibrinogen beta chain | 38 | Carbamidomethyl+C(2)                        | ECEEIIR                              | 239 | 7  | 0  | 0.9   |                                                 | 930.43  | 34.062  | 4312   | 2 | 465.72  | 2.56   |
| P06396 GELS_HUMAN Gelsolin              | 1  |                                             | AGALNSNDAFVLK                        | 584 | 13 | 8  | 46.32 | b3b11°b11b13y9y10y11y13                         | 1319.70 | 59.875  | 257723 | 2 | 660.35  | -0.28  |
| P06396 GELS_HUMAN Gelsolin              | 2  |                                             | VPFDAATLHTSTAMAAQHGMDD DGTGQK        | 419 | 28 | 18 | 79.53 | b4b5b8b9°b9b13b14°b14y1y5°y5*y5y6°y6y8y10y19y28 | 2873.27 | 56.054  | 212554 | 4 | 719.07  | -4.59  |
| P06396 GELS_HUMAN Gelsolin              | 3  |                                             | QTQVSVLPEGGETPLFK                    | 373 | 17 | 15 | 83.09 | b3b5°b5°b5b15y2y4y10°y10y11y12y13y14y17*y17     | 1829.97 | 72.382  | 128894 | 2 | 915.49  | 2.74   |
| P06396 GELS_HUMAN Gelsolin              | 4  |                                             | NWRDPDQTDGLGLSYLSSHIANV ER           | 394 | 25 | 11 | 66.37 | b4b6b7b14y3y5y8y10y12y14y25                     | 2843.35 | 77.383  | 122243 | 4 | 711.59  | -9.02  |
| P06396 GELS_HUMAN Gelsolin              | 5  |                                             | AQPVQVAEGSEPDGFWEALGGK               | 626 | 22 | 7  | 28.25 | b2°b2y3y11y12y19y22                             | 2272.11 | 81.819  | 103583 | 2 | 1136.56 | 7.74   |
| P06396 GELS_HUMAN Gelsolin              | 6  |                                             | TGAQELLR                             | 615 | 8  | 6  | 39.59 | y2y3y4°y4y7y8                                   | 887.49  | 40.135  | 95745  | 2 | 444.25  | -6.88  |
| P06396 GELS_HUMAN Gelsolin              | 7  |                                             | TPSAAYLWVGTGASEAEK                   | 597 | 18 | 11 | 57.7  | b4°b4b5b7°b7b8b10b15°b15y1y4                    | 1837.88 | 67.388  | 75485  | 2 | 919.44  | -11.69 |
| P06396 GELS_HUMAN Gelsolin              | 8  | Carbamidomethyl+C(16);Carbamidomethyl+C(29) | ATEVPVSWESFNNGDCFILDLGN NIHQWCGSNSNR | 199 | 35 | 16 | 67.62 | b2b3°b3b4b8b11°b11b13y4y6y14y15y16y18y19y35     | 4037.81 | 98.937  | 69211  | 3 | 1346.61 | 5.20   |
| P06396 GELS_HUMAN Gelsolin              | 9  |                                             | AGKEPGLQIWR                          | 61  | 11 | 6  | 50.87 | b4y4y6y7y8y11                                   | 1254.68 | 54.985  | 62370  | 3 | 418.90  | -14.11 |
| P06396 GELS_HUMAN Gelsolin              | 10 |                                             | EVQGFESATFLGYFK                      | 147 | 15 | 13 | 74.21 | b6°b6b7b14y1y3y4y10°y10y11y12y15*y15            | 1722.84 | 89.535  | 56062  | 2 | 861.92  | 1.20   |
| P06396 GELS_HUMAN Gelsolin              | 11 |                                             | AVEVLPK                              | 577 | 7  | 5  | 36.13 | b1b4y5y6y7                                      | 755.46  | 38.779  | 37009  | 2 | 378.23  | -4.85  |
| P06396 GELS_HUMAN Gelsolin              | 12 | Carbamidomethyl+C(4)                        | SEDCFILDHGK                          | 327 | 11 | 6  | 26.17 | b9b11°b11y4y5y11                                | 1320.58 | 47.495  | 33180  | 3 | 440.87  | -6.29  |
| P06396 GELS_HUMAN Gelsolin              | 13 |                                             | AMAELAA                              | 775 | 7  | 6  | 39.14 | b1b2b3b6y6°y6                                   | 676.34  | 44.984  | 27695  | 1 | 676.34  | 9.39   |
| P06396 GELS_HUMAN Gelsolin              | 14 | Carbamidomethyl+C(4)                        | LFACSNK                              | 668 | 7  | 9  | 64.63 | b2b4b5b6°b6y4°y4y5y7                            | 839.40  | 28.711  | 25599  | 2 | 420.20  | -13.02 |

|                                            |    |                                                      |                                            |     |    |    |        |                                                           |         |         |        |   |         |        |
|--------------------------------------------|----|------------------------------------------------------|--------------------------------------------|-----|----|----|--------|-----------------------------------------------------------|---------|---------|--------|---|---------|--------|
| IP06396 GELS_HUMAN Gelsolin                | 15 |                                                      | VSNAGATMSVSLVADENPFAQGA<br>LK              | 302 | 25 | 7  | 35.08  | b7b8b11y11y12*y12y25                                      | 2463.24 | 81.978  | 24036  | 2 | 1232.12 | 9.02   |
| IP06396 GELS_HUMAN Gelsolin                | 16 |                                                      | VHVSEEGTEPEAMLQVLGPKPAL<br>PAGTEDTAK       | 257 | 32 | 9  | 23.73  | b7°b7b9b12b13°b13y1y2y9                                   | 3301.63 | 127.248 | 23137  | 3 | 1101.21 | -10.57 |
| IP06396 GELS_HUMAN Gelsolin                | 17 |                                                      | HVVPNEVVVQR                                | 177 | 11 | 3  | 23.16  | b3y4y8                                                    | 1275.72 | 37.059  | 21745  | 2 | 638.36  | 0.67   |
| IP06396 GELS_HUMAN Gelsolin                | 18 |                                                      | VPVDPATYQGQFYGGDSYIILYNYR                  | 457 | 24 | 5  | 22.4   | b21y4y11y12*y12                                           | 2771.35 | 88.831  | 12675  | 2 | 1386.18 | 4.85   |
| IP06396 GELS_HUMAN Gelsolin                | 19 | Carbamidomethyl+C(16)                                | NGNLQYDLHYWLGNECSQDESQ<br>AAAIFTVQLDDYLNDR | 104 | 38 | 5  | 22.84  | b1b7b8°b8y15                                              | 4346.97 | 76.094  | 7728   | 5 | 870.20  | -0.45  |
| IP06396 GELS_HUMAN Gelsolin                | 20 |                                                      | TASDFITK                                   | 360 | 8  | 3  | 31.81  | b3y5y6                                                    | 882.45  | 37.189  | 76784  | 2 | 441.73  | -6.71  |
| IP06396 GELS_HUMAN Gelsolin                | 21 |                                                      | IFVWK                                      | 341 | 5  | 1  | 12.75  | y4                                                        | 692.40  | 61.203  | 16888  | 2 | 346.71  | -13.93 |
| IP06396 GELS_HUMAN Gelsolin                | 22 |                                                      | LFQVK                                      | 188 | 5  | 2  | 12.75  | b4°b4                                                     | 634.40  | 40.523  | 10640  | 1 | 634.40  | 12.99  |
| IP06396 GELS_HUMAN Gelsolin                | 23 |                                                      | DPDQTDGLGLSYLSSHIANVER                     | 397 | 22 | 8  | 29.07  | b6b8b13b15°b15y4°y4*y4                                    | 2387.13 | 68.107  | 5885   | 3 | 796.38  | -5.93  |
| IP06396 GELS_HUMAN Gelsolin                | 24 |                                                      | EPAHLSLFGGKPMIYK                           | 530 | 18 | 3  | 23.67  | b3b4b8                                                    | 2032.10 | 71.742  | 5721   | 3 | 678.04  | 10.99  |
| IP06396 GELS_HUMAN Gelsolin                | 25 |                                                      | QGFEPSPFVGVWFLGWDDDYWSV<br>DPLDR           | 748 | 27 | 4  | 24.43  | b11b12y6y11                                               | 3230.47 | 104.175 | 5479   | 3 | 1077.50 | 5.52   |
| IP06396 GELS_HUMAN Gelsolin                | 26 |                                                      | YIETDPANR                                  | 729 | 9  | 6  | 43.75  | b6y4*y4y5y6°y6                                            | 1078.51 | 26.378  | 2908   | 2 | 539.76  | -1.47  |
| IP06396 GELS_HUMAN Gelsolin                | 27 |                                                      | GASQAGAPQGR                                | 32  | 11 | 9  | 64.4   | b4°b4b9°b9y4y6y8y9*y9                                     | 999.50  | 25.286  | 2359   | 2 | 500.25  | 0.55   |
| IP06396 GELS_HUMAN Gelsolin                | 28 |                                                      | IEGSKVPVDPATYQGQFYGGDSYI<br>ILYNYR         | 451 | 30 | 18 | 123.38 | b6°b6b7°b7b10°b10b25b2<br>7y3y4y5y6y10y11y12y13y<br>14y23 | 3399.66 | 84.174  | 89531  | 3 | 1133.89 | 0.57   |
| IP06396 GELS_HUMAN Gelsolin                | 29 |                                                      | VHVSEEGTEPEAMLQVLGPKPAL<br>PAGTEDTAKEDAANR | 257 | 38 | 3  | 16.55  | b3b7b9                                                    | 3957.90 | 70.009  | 61572  | 5 | 792.39  | -12.52 |
| IP06396 GELS_HUMAN Gelsolin                | 30 |                                                      | MDYPKQTQVSVLPEGGETPLFK                     | 368 | 22 | 3  | 19.3   | b5b10b12                                                  | 2464.24 | 71.918  | 30815  | 3 | 822.09  | 0.10   |
| IP06396 GELS_HUMAN Gelsolin                | 31 |                                                      | YIETDPANRDR                                | 729 | 11 | 8  | 39.7   | b6°b6b7°b7y3y4°y4*y4                                      | 1349.64 | 25.397  | 18628  | 3 | 450.55  | -4.25  |
| IP06396 GELS_HUMAN Gelsolin                | 32 |                                                      | GGTSREGGQTAPASTR                           | 548 | 16 | 7  | 32.9   | b3°b3b10y6y8y12*y12                                       | 1532.74 | 27.148  | 6905   | 2 | 766.87  | -2.39  |
| IP06396 GELS_HUMAN Gelsolin                | 33 |                                                      | QANTEERK                                   | 348 | 8  | 5  | 47.56  | b4b5°b5b7y3                                               | 975.48  | 27.730  | 4252   | 2 | 488.24  | -2.88  |
| IP06396 GELS_HUMAN Gelsolin                | 34 | Carbamidomethyl+C(16)<br>;Carbamidomethyl+C(29)<br>) | ATEVPVSWESFNNGDCFILDLGN<br>NIHQWCGSNSNRYER | 199 | 38 | 6  | 11.91  | b4°b4b12y6*y6y11                                          | 4485.95 | 77.998  | 3944   | 5 | 898.00  | -10.67 |
| IP06396 GELS_HUMAN Gelsolin                | 35 |                                                      | TASDFITKMDYPK                              | 360 | 13 | 3  | 19.58  | b5b8y9                                                    | 1516.73 | 103.641 | 2526   | 2 | 758.87  | -3.54  |
| IP06396 GELS_HUMAN Gelsolin                | 36 | Phosphoryl STY(13)                                   | QTQVSVLPEGGETPLFK                          | 373 | 17 | 3  | 15.44  | b11b14_H3PO4 b14y9                                        | 1909.92 | 72.868  | 249797 | 2 | 955.46  | -0.26  |
| IP06396 GELS_HUMAN Gelsolin                | 37 | Phosphoryl STY(14)                                   | AVQHREVQGFESATFLGYFK                       | 142 | 20 | 6  | 24.04  | b10°b10b13b14y15°y15                                      | 2394.08 | 99.026  | 7958   | 3 | 798.70  | -14.79 |
| IP06396 GELS_HUMAN Gelsolin                | 38 | Phosphoryl STY(11)                                   | TPSAAYLWVGTGASEAEK                         | 597 | 18 | 3  | 14.75  | b9y7y14_HPO3 y14                                          | 1917.85 | 67.496  | 1607   | 2 | 959.43  | -0.38  |
| IP06396 GELS_HUMAN Gelsolin                | 39 | Carbamidomethyl+C(13)                                | FILDLGNNIHWCGSNSNR                         | 215 | 19 | 0  | 13.49  |                                                           | 2245.08 | 98.916  | 6756   | 3 | 749.03  | 10.00  |
| IP06396 GELS_HUMAN Gelsolin                | 40 | Carbamidomethyl+C(2)                                 | DCFILDHKG                                  | 329 | 9  | 0  | 2.7    |                                                           | 1104.52 | 47.470  | 2796   | 2 | 552.76  | 1.99   |
| IP04350 TBB4_HUMAN Tubulin beta-4<br>chain | 1  |                                                      | LAVNMVPFPR                                 | 252 | 10 | 14 | 109.18 | b2b3b5°b5y1y3y4y5y6y7y<br>8y9*y9y10                       | 1143.63 | 71.952  | 238985 | 2 | 572.32  | -5.12  |
| IP04350 TBB4_HUMAN Tubulin beta-4<br>chain | 2  |                                                      | SGPFGQIFRPDNFVFGQSGAGNN<br>WAK             | 77  | 26 | 12 | 72.68  | b3b13b15y6y7*y7y8y9y11<br>y12y21y26                       | 2798.35 | 88.914  | 158922 | 3 | 933.45  | 1.66   |
| IP04350 TBB4_HUMAN Tubulin beta-4<br>chain | 3  |                                                      | IMNTFSVVPSPK                               | 162 | 12 | 6  | 47.64  | b3y5y7y8y9y12                                             | 1319.71 | 62.942  | 110098 | 2 | 660.36  | 2.50   |
| IP04350 TBB4_HUMAN Tubulin beta-4<br>chain | 4  | Carbamidomethyl+C(23)                                | LTTPTYGDLNHLVSATMSGVTTC<br>LR              | 216 | 25 | 12 | 109.51 | y2y3y4y5y7y8y9y10y12y1<br>3y14y25                         | 2708.33 | 94.631  | 70860  | 3 | 903.45  | -2.70  |
| IP04350 TBB4_HUMAN Tubulin beta-4<br>chain | 5  | Carbamidomethyl+C(5);<br>Carbamidomethyl+C(7)        | EAESCDCLQGFLTHSLGGGTGS<br>GMGTLISK         | 122 | 32 | 4  | 22.6   | y3y4y7y32                                                 | 3311.56 | 81.000  | 50613  | 3 | 1104.52 | 7.08   |
| IP04350 TBB4_HUMAN Tubulin beta-4<br>chain | 6  |                                                      | AVLVDLEPGTMDSVR                            | 62  | 15 | 8  | 35.18  | b2b3b11y2y8y9y11y15                                       | 1601.81 | 70.193  | 49736  | 2 | 801.41  | -3.81  |



|                                           |    |                       |                              |     |    |    |        |                                                   |         |         |        |   |         |        |
|-------------------------------------------|----|-----------------------|------------------------------|-----|----|----|--------|---------------------------------------------------|---------|---------|--------|---|---------|--------|
| P04350 TBB4_HUMAN Tubulin beta-4 chain    | 7  |                       | ALTVPELTQQMFDKAK             | 282 | 15 | 6  | 28     | b6b11b13°b13y1y11                                 | 1691.88 | 85.032  | 28221  | 2 | 846.44  | 5.41   |
| P04350 TBB4_HUMAN Tubulin beta-4 chain    | 8  |                       | INVYYNEATGGNYVPR             | 46  | 16 | 8  | 26.27  | b2b6*b6y1y5y11°y11y13                             | 1829.87 | 81.006  | 20989  | 2 | 915.44  | -7.60  |
| P04350 TBB4_HUMAN Tubulin beta-4 chain    | 9  |                       | ISEQFTAMFRR                  | 380 | 11 | 11 | 68.38  | b2b3b4°b4b5°b5b6b9y10y11*y11                      | 1385.71 | 57.850  | 7991   | 2 | 693.36  | 9.51   |
| P04350 TBB4_HUMAN Tubulin beta-4 chain    | 10 |                       | LHFFMPGFAPLTSR               | 262 | 14 | 3  | 18.27  | b12y3y12                                          | 1620.83 | 112.804 | 1500   | 2 | 810.92  | -2.64  |
| P04350 TBB4_HUMAN Tubulin beta-4 chain    | 11 |                       | MAATFIGNSTAIQELFK            | 362 | 17 | 9  | 40.46  | b3b6°b6b7b11*b11y3y5*y5                           | 1841.96 | 115.459 | 22989  | 3 | 614.66  | 9.21   |
| P04350 TBB4_HUMAN Tubulin beta-4 chain    | 12 | Carbamidomethyl+C(10) | EIVHLQAGQCGNQIGAK            | 2   | 17 | 5  | 26.05  | b10b11b13*b13y13                                  | 1822.89 | 60.029  | 5820   | 2 | 911.95  | -15.80 |
| P04350 TBB4_HUMAN Tubulin beta-4 chain    | 13 | Phosphoryl.STY()      | ALTVPELTQQMFDKAK             | 282 | 15 | 6  | 35.18  | b8°b8b14y6_H3PO4 y6y7y11                          | 1771.81 | 109.621 | 3589   | 2 | 886.41  | -7.17  |
| P04350 TBB4_HUMAN Tubulin beta-4 chain    | 14 |                       | LTQQMFDKAK                   | 288 | 9  | 0  | 4.5    |                                                   | 1081.54 | 85.067  | 4448   | 1 | 1081.54 | 3.72   |
| Q71U36 TBA1A_HUMAN Tubulin alpha-1A chain | 1  |                       | AVFVDLEPTVIDEVR              | 64  | 15 | 21 | 200.65 | b2b3b4b5b6b7y2y3°y3y4y5y6y7y8y9°y9y10y11y12y13y15 | 1701.90 | 83.503  | 292343 | 2 | 851.46  | -0.79  |
| Q71U36 TBA1A_HUMAN Tubulin alpha-1A chain | 2  |                       | VGINYQPPTVPPGGDLAK           | 352 | 18 | 16 | 67.07  | b4*b4b5*b5b6*b6b7*b7b11°b11y1y2y8y12y14y18        | 1825.00 | 64.922  | 216139 | 2 | 913.00  | 5.55   |
| Q71U36 TBA1A_HUMAN Tubulin alpha-1A chain | 3  |                       | NLDIERPTYTNLNR               | 215 | 14 | 16 | 60.05  | b2*b2b3°b3b5°b5b7y2y4*y4y7y8y12*y12y14*y14        | 1718.86 | 51.755  | 209644 | 3 | 573.63  | -11.43 |
| Q71U36 TBA1A_HUMAN Tubulin alpha-1A chain | 4  |                       | QLFHPEQLITGKEDAANNYAR        | 84  | 21 | 11 | 53.17  | b6*b6y2y3y5y6y7y9y12y21*y21                       | 2415.17 | 61.209  | 194281 | 4 | 604.55  | -13.34 |
| Q71U36 TBA1A_HUMAN Tubulin alpha-1A chain | 5  |                       | EIIDLVDR                     | 112 | 9  | 9  | 59.51  | b2b4y1y2y3y4y5y6y9                                | 1085.62 | 78.680  | 87204  | 2 | 543.31  | -3.94  |
| Q71U36 TBA1A_HUMAN Tubulin alpha-1A chain | 6  | Carbamidomethyl+C(3)  | AVCMLSNTTAAIEAWAR            | 373 | 17 | 7  | 37.33  | b8y4y8y11°y11*y11y16                              | 1864.91 | 83.137  | 85045  | 2 | 932.96  | 3.34   |
| Q71U36 TBA1A_HUMAN Tubulin alpha-1A chain | 7  |                       | DVNAAIATIK                   | 326 | 10 | 6  | 37.67  | b3b8y1y6y8y10                                     | 1015.57 | 51.251  | 84912  | 2 | 508.29  | -4.69  |
| Q71U36 TBA1A_HUMAN Tubulin alpha-1A chain | 8  | Carbamidomethyl+C(15) | AYHEQLSVAEITNACFEPANQMV K    | 280 | 24 | 7  | 32.35  | b10b11b14y1y7y11y13                               | 2750.30 | 72.595  | 73730  | 3 | 917.44  | 4.79   |
| Q71U36 TBA1A_HUMAN Tubulin alpha-1A chain | 9  |                       | FDGALNVDLTFEQTNLVPYPR        | 243 | 21 | 11 | 54.9   | b2b3b4b16b17b21y2y4y5y11y21                       | 2409.22 | 93.917  | 46804  | 2 | 1205.11 | 3.75   |
| Q71U36 TBA1A_HUMAN Tubulin alpha-1A chain | 10 |                       | LSVDYGGK                     | 156 | 8  | 5  | 39.59  | b2y4y5y7y8                                        | 909.50  | 28.259  | 28744  | 2 | 455.25  | -6.64  |
| Q71U36 TBA1A_HUMAN Tubulin alpha-1A chain | 11 |                       | AFVHWYVGEEMEEGFSEARED MAALEK | 402 | 28 | 4  | 16.47  | b3b7b14y10                                        | 3217.46 | 93.270  | 3832   | 3 | 1073.16 | 10.78  |
| Q71U36 TBA1A_HUMAN Tubulin alpha-1A chain | 12 | Phosphoryl.STY()      | FDGALNVDLTFEQTNLVPYPR        | 243 | 21 | 6  | 23.54  | b5°b5b6_H3PO4 b6°b6b13_H3PO4 b13y8                | 2489.19 | 98.956  | 2201   | 3 | 830.40  | 10.59  |
| Q9BQE3 TBA1C_HUMAN Tubulin alpha-1C chain | 1  |                       | AVFVDLEPTVIDEVR              | 64  | 15 | 21 | 200.65 | b2b3b4b5b6b7y2y3°y3y4y5y6y7y8y9°y9y10y11y12y13y15 | 1701.90 | 83.503  | 292343 | 2 | 851.46  | -0.79  |
| Q9BQE3 TBA1C_HUMAN Tubulin alpha-1C chain | 2  |                       | VGINYQPPTVPPGGDLAK           | 352 | 18 | 16 | 67.07  | b4*b4b5*b5b6*b6b7*b7b11°b11y1y2y8y12y14y18        | 1825.00 | 64.922  | 216139 | 2 | 913.00  | 5.55   |
| Q9BQE3 TBA1C_HUMAN Tubulin alpha-1C chain | 3  |                       | NLDIERPTYTNLNR               | 215 | 14 | 16 | 60.05  | b2*b2b3°b3b5°b5b7y2y4*y4y7y8y12*y12y14*y14        | 1718.86 | 51.755  | 209644 | 3 | 573.63  | -11.43 |
| Q9BQE3 TBA1C_HUMAN Tubulin alpha-1C chain | 4  |                       | QLFHPEQLITGKEDAANNYAR        | 84  | 21 | 11 | 53.17  | b6*b6y2y3y5y6y7y9y12y21*y21                       | 2415.17 | 61.209  | 194281 | 4 | 604.55  | -13.34 |
| Q9BQE3 TBA1C_HUMAN Tubulin alpha-1C chain | 5  |                       | EIIDLVDR                     | 112 | 9  | 9  | 59.51  | b2b4y1y2y3y4y5y6y9                                | 1085.62 | 78.680  | 87204  | 2 | 543.31  | -3.94  |
| Q9BQE3 TBA1C_HUMAN Tubulin alpha-1C chain | 6  |                       | DVNAAIATIK                   | 326 | 10 | 6  | 37.67  | b3b8y1y6y8y10                                     | 1015.57 | 51.251  | 84912  | 2 | 508.29  | -4.69  |

|                                           |    |                                            |                               |      |    |    |        |                                                                         |         |         |        |   |         |        |
|-------------------------------------------|----|--------------------------------------------|-------------------------------|------|----|----|--------|-------------------------------------------------------------------------|---------|---------|--------|---|---------|--------|
| Q9BQE3 TBA1C_HUMAN Tubulin alpha-1C chain | 7  |                                            | FDGALNVDLTEFQTNLVYPR          | 243  | 21 | 11 | 54.9   | b2b3b4b16b17b21y2y4y5y11y21                                             | 2409.22 | 93.917  | 46804  | 2 | 1205.11 | 3.75   |
| Q9BQE3 TBA1C_HUMAN Tubulin alpha-1C chain | 8  |                                            | LISQIVSSITASLR                | 229  | 14 | 5  | 18.27  | b5°b5y4y8y14                                                            | 1487.88 | 99.046  | 34411  | 2 | 744.44  | 1.80   |
| Q9BQE3 TBA1C_HUMAN Tubulin alpha-1C chain | 9  |                                            | LSVDYGGK                      | 156  | 8  | 5  | 39.59  | b2y4y5y7y8                                                              | 909.50  | 28.259  | 28744  | 2 | 455.25  | -6.64  |
| Q9BQE3 TBA1C_HUMAN Tubulin alpha-1C chain | 10 |                                            | AFVHWYVYVGEEMEEGFSEAREDMAALEK | 402  | 28 | 4  | 16.47  | b3b7b14y10                                                              | 3217.46 | 93.270  | 3832   | 3 | 1073.16 | 10.78  |
| Q9BQE3 TBA1C_HUMAN Tubulin alpha-1C chain | 11 | Carbamidomethyl+C(4); Carbamidomethyl+C(5) | YMACCLLYR                     | 311  | 9  | 3  | 29.25  | b8y5y7                                                                  | 1249.56 | 60.848  | 41594  | 2 | 625.29  | 8.01   |
| Q9BQE3 TBA1C_HUMAN Tubulin alpha-1C chain | 12 | Carbamidomethyl+C(15)                      | AYHEQLTVAEITNACFEPANQMV<br>K  | 280  | 24 | 5  | 12.15  | b9b11°b11y8°y8                                                          | 2764.32 | 73.242  | 11638  | 3 | 922.11  | 3.00   |
| Q9BQE3 TBA1C_HUMAN Tubulin alpha-1C chain | 13 |                                            | DVNAAIATIKTK                  | 326  | 12 | 3  | 34.4   | b4b5b6                                                                  | 1244.71 | 15.972  | 3164   | 3 | 415.57  | -11.28 |
| Q9BQE3 TBA1C_HUMAN Tubulin alpha-1C chain | 14 | Carbamidomethyl+C(15);Phosphoryl STY(12)   | AYHEQLTVAEITNACFEPANQMV<br>K  | 280  | 24 | 4  | 35.73  | b9b11b12b13_H3PO4 b13                                                   | 2844.25 | 72.300  | 5871   | 3 | 948.75  | -5.84  |
| Q9BQE3 TBA1C_HUMAN Tubulin alpha-1C chain | 15 | Carbamidomethyl+C(3); Oxidation+M(4)       | AVCMLSNTTAVAEAWAR             | 373  | 17 | 5  | 21.57  | b10°b10b13y10y12                                                        | 1866.89 | 57.893  | 45646  | 2 | 933.95  | 5.88   |
| Q9BQE3 TBA1C_HUMAN Tubulin alpha-1C chain | 16 |                                            | AFVHWYVYVGEEMEEGFSE           | 402  | 18 | 0  | 10.34  |                                                                         | 2102.90 | 93.276  | 3103   | 3 | 701.64  | 10.45  |
| Q9BQE3 TBA1C_HUMAN Tubulin alpha-1C chain | 17 |                                            | PTVIDEVR                      | 71   | 8  | 0  | 4.5    |                                                                         | 928.51  | 83.497  | 1691   | 2 | 464.76  | -5.19  |
| Q7Z406 MYH14_HUMAN Myosin-14              | 1  |                                            | QLLQANPILEAFGNAK              | 236  | 16 | 28 | 174.36 | b2*b2b3*b3b4*b4b5*b5b6*b6b16y1y2y4y5y6y7*y7y8y10y11y12y13*y13y14*y14y16 | 1726.95 | 90.461  | 238751 | 2 | 863.98  | 0.78   |
| Q7Z406 MYH14_HUMAN Myosin-14              | 2  |                                            | KEEELQAALAR                   | 1104 | 11 | 12 | 81.92  | b2°b2b3°b3b8y4y5y7y9y10*y10y11                                          | 1257.68 | 41.624  | 81195  | 2 | 629.34  | 0.29   |
| Q7Z406 MYH14_HUMAN Myosin-14              | 3  | Carbamidomethyl+C(1)                       | CNGVLEGIR                     | 717  | 9  | 10 | 59.51  | b1b2*b2b4y3y4y5y7y9*y9                                                  | 1017.51 | 47.905  | 75078  | 2 | 509.26  | -1.50  |
| Q7Z406 MYH14_HUMAN Myosin-14              | 4  |                                            | LAQAEEQLQETR                  | 1839 | 13 | 8  | 39.81  | b6b8b9°b9b12°b12y13*y13                                                 | 1544.76 | 50.203  | 53688  | 2 | 772.88  | 0.79   |
| Q7Z406 MYH14_HUMAN Myosin-14              | 5  |                                            | FDQLLAEEK                     | 1469 | 9  | 8  | 43.24  | b2b6*b6b7y2y5y6y9                                                       | 1092.56 | 49.312  | 48659  | 2 | 546.78  | 1.12   |
| Q7Z406 MYH14_HUMAN Myosin-14              | 6  |                                            | QLPIYTEAIVEMYR                | 149  | 14 | 10 | 29.26  | b2*b2b3b4b13*b13y1y3y14*y14                                             | 1725.86 | 84.848  | 30188  | 3 | 575.96  | -14.78 |
| Q7Z406 MYH14_HUMAN Myosin-14              | 7  |                                            | AQTKEQADFALEALAK              | 429  | 16 | 9  | 40.78  | b2b5b6b7*b7b10y2y15y16                                                  | 1733.90 | 90.356  | 14418  | 2 | 867.45  | -4.36  |
| Q7Z406 MYH14_HUMAN Myosin-14              | 8  |                                            | LQEELAASDR                    | 1708 | 10 | 5  | 25.72  | b3*b3y7y9y10                                                            | 1131.57 | 59.089  | 14096  | 2 | 566.29  | 5.29   |
| Q7Z406 MYH14_HUMAN Myosin-14              | 9  |                                            | EAQAALAEAQEDLESER             | 1131 | 17 | 7  | 24.8   | b5°b5b10b13°b13y11y17                                                   | 1859.85 | 67.378  | 13517  | 2 | 930.43  | -5.64  |
| Q7Z406 MYH14_HUMAN Myosin-14              | 10 |                                            | ANEWLKMK                      | 606  | 7  | 12 | 54.89  | b1b2*b2b3b5°b5y5°y5y6°y6*y6y7                                           | 891.43  | 27.130  | 8945   | 2 | 446.22  | -6.37  |
| Q7Z406 MYH14_HUMAN Myosin-14              | 11 |                                            | AMEAEAAGLR                    | 1356 | 10 | 5  | 27.48  | b3b4b10y6y10                                                            | 1018.51 | 43.639  | 8449   | 2 | 509.76  | 10.61  |
| Q7Z406 MYH14_HUMAN Myosin-14              | 12 |                                            | TQHERDLQGR                    | 1590 | 10 | 9  | 41.47  | b4b5°b5*b5b6°b6y2y5°y5                                                  | 1239.61 | 21.572  | 4716   | 3 | 413.88  | -5.91  |
| Q7Z406 MYH14_HUMAN Myosin-14              | 13 |                                            | AQAELNVSGALNEAESK             | 1301 | 18 | 5  | 30.97  | b12b13b15y5y10                                                          | 1859.90 | 57.150  | 4312   | 3 | 620.64  | 3.28   |
| Q7Z406 MYH14_HUMAN Myosin-14              | 14 |                                            | AAVTMSVPGRK                   | 1    | 11 | 5  | 18.19  | b2b3b7°b7y7°                                                            | 1116.62 | 19.687  | 2327   | 2 | 558.81  | 0.11   |
| Q7Z406 MYH14_HUMAN Myosin-14              | 15 |                                            | AGRELQTAQAQLSEWR              | 1378 | 16 | 5  | 26.27  | b14y3°y3y9y13                                                           | 1843.94 | 109.573 | 2089   | 2 | 922.47  | -0.86  |
| Q7Z406 MYH14_HUMAN Myosin-14              | 16 |                                            | ELSSTEAQLHDAQELLQEETR         | 1325 | 21 | 3  | 13.18  | b3b11y4                                                                 | 2427.16 | 96.490  | 1903   | 2 | 1214.08 | -1.91  |

|                              |    |                      |                                |      |    |    |       |                                   |         |         |        |   |         |        |
|------------------------------|----|----------------------|--------------------------------|------|----|----|-------|-----------------------------------|---------|---------|--------|---|---------|--------|
| Q7Z406 MYH14_HUMAN Myosin-14 | 17 |                      | QEEEGALEAGEEAR                 | 1396 | 15 | 6  | 35.18 | b12b14y6°y6y9y10                  | 1588.73 | 51.164  | 128075 | 3 | 530.25  | 12.52  |
| Q7Z406 MYH14_HUMAN Myosin-14 | 18 |                      | GPSAGGGPGSGTSPQVWETAR          | 32   | 21 | 6  | 23.54 | b18°b18y11*y11y12y16              | 1955.90 | 68.575  | 123239 | 3 | 652.64  | -8.24  |
| Q7Z406 MYH14_HUMAN Myosin-14 | 19 |                      | LQQLFNHTMFVLEQEEYQR            | 501  | 19 | 4  | 14.15 | b12°b12b18y5                      | 2453.17 | 104.804 | 52977  | 4 | 614.05  | -9.45  |
| Q7Z406 MYH14_HUMAN Myosin-14 | 20 |                      | AAVTMSVPGR                     | 1    | 10 | 3  | 25.72 | b3y3y6                            | 988.50  | 27.201  | 45074  | 2 | 494.76  | -21.18 |
| Q7Z406 MYH14_HUMAN Myosin-14 | 21 |                      | EEELQAALAR                     | 1105 | 10 | 4  | 50.22 | y3y5y6y7                          | 1129.58 | 48.587  | 31679  | 2 | 565.30  | -1.84  |
| Q7Z406 MYH14_HUMAN Myosin-14 | 22 |                      | HEVPPHVYAVTEGAYR               | 167  | 16 | 5  | 33.57 | b5b9b10y6y13                      | 1824.88 | 87.636  | 30590  | 2 | 912.94  | -14.05 |
| Q7Z406 MYH14_HUMAN Myosin-14 | 23 |                      | ELQTAQAQLSEWR                  | 1381 | 13 | 6  | 52.29 | b6b10b11y4y8y11                   | 1559.79 | 65.030  | 29697  | 2 | 780.40  | 2.66   |
| Q7Z406 MYH14_HUMAN Myosin-14 | 24 |                      | VQELQQSAR                      | 880  | 10 | 5  | 25.72 | b5°b5b9*b9y9                      | 1186.63 | 62.593  | 19269  | 2 | 593.82  | 8.02   |
| Q7Z406 MYH14_HUMAN Myosin-14 | 25 |                      | LQQHIQELEAHLEAEEGAR            | 964  | 19 | 4  | 21.93 | b10b11°b11y6                      | 2201.07 | 66.604  | 11832  | 3 | 734.36  | -11.98 |
| Q7Z406 MYH14_HUMAN Myosin-14 | 26 |                      | LMATLSNTNPSFVR                 | 680  | 14 | 7  | 26.09 | b7°b7°b7b10y9*y9y11               | 1550.83 | 115.452 | 11100  | 2 | 775.92  | 17.79  |
| Q7Z406 MYH14_HUMAN Myosin-14 | 27 | Carbamidomethyl+C(8) | ADLLEPCSHYR                    | 316  | 12 | 4  | 30.61 | b3b6y3y6                          | 1473.71 | 29.377  | 9206   | 3 | 491.91  | -4.72  |
| Q7Z406 MYH14_HUMAN Myosin-14 | 28 |                      | FLTNGPSSSPGQER                 | 328  | 14 | 4  | 26.85 | y5y8°y8y11                        | 1476.73 | 57.267  | 8803   | 2 | 738.87  | 16.04  |
| Q7Z406 MYH14_HUMAN Myosin-14 | 29 |                      | EPGVPGELER                     | 226  | 10 | 4  | 25.72 | b3y5°y5y7                         | 1082.54 | 28.730  | 8154   | 2 | 541.77  | -8.34  |
| Q7Z406 MYH14_HUMAN Myosin-14 | 30 |                      | VLGFSHEEISMLR                  | 353  | 14 | 3  | 26.85 | b4b10b12                          | 1630.89 | 59.611  | 6968   | 3 | 544.30  | 18.86  |
| Q7Z406 MYH14_HUMAN Myosin-14 | 31 |                      | VAEQAANDLR                     | 1552 | 10 | 4  | 25.72 | b6b9y5°y5                         | 1086.58 | 28.342  | 6559   | 2 | 543.79  | 21.46  |
| Q7Z406 MYH14_HUMAN Myosin-14 | 32 | Carbamidomethyl+C(7) | VGEEEECSR                      | 947  | 9  | 4  | 29.25 | b4°b4y4y7                         | 1094.46 | 26.384  | 6080   | 3 | 365.49  | 17.96  |
| Q7Z406 MYH14_HUMAN Myosin-14 | 33 |                      | IVWPSHPR                       | 1022 | 9  | 5  | 29.25 | b6°b6b7y6°y6                      | 1078.57 | 47.153  | 5466   | 2 | 539.79  | -9.73  |
| Q7Z406 MYH14_HUMAN Myosin-14 | 34 |                      | LDGESSELQEQMVEQQQR             | 1076 | 18 | 4  | 20.44 | b4b11y6y11                        | 2134.02 | 70.256  | 4721   | 2 | 1067.51 | 20.36  |
| Q7Z406 MYH14_HUMAN Myosin-14 | 35 |                      | AQVTELEDELTAEDAK               | 1562 | 17 | 7  | 24.8  | b5y3°y3y7°y9°y9                   | 1832.84 | 28.795  | 4195   | 2 | 916.92  | -18.85 |
| Q7Z406 MYH14_HUMAN Myosin-14 | 36 |                      | DLGELEALR                      | 1159 | 10 | 5  | 41.47 | b6b7°b7b8y8                       | 1144.58 | 98.906  | 3083   | 1 | 1144.58 | -6.29  |
| Q7Z406 MYH14_HUMAN Myosin-14 | 37 |                      | EVVLQVEEER                     | 1869 | 10 | 6  | 55.98 | b3b7b8*b8b9y6                     | 1229.63 | 42.506  | 2815   | 2 | 615.32  | -8.74  |
| Q7Z406 MYH14_HUMAN Myosin-14 | 38 |                      | LGQLEEELEEQNSSELLNDR           | 1754 | 21 | 5  | 23.54 | b9y9*y9y13y14                     | 2474.12 | 76.371  | 2371   | 3 | 825.38  | -15.20 |
| Q7Z406 MYH14_HUMAN Myosin-14 | 39 |                      | QMQTEK                         | 956  | 6  | 2  | 13.2  | b4°b4                             | 764.36  | 31.108  | 2124   | 1 | 764.36  | 5.19   |
| Q7Z406 MYH14_HUMAN Myosin-14 | 40 |                      | QAQQDR                         | 1721 | 6  | 1  | 13.2  | y5                                | 745.35  | 57.872  | 1739   | 1 | 745.35  | -7.04  |
| Q7Z406 MYH14_HUMAN Myosin-14 | 41 |                      | ANEWLKMNMDPLNDNVAALLHQ<br>STDR | 606  | 26 | 6  | 39.6  | b4b5b10b12b13y6                   | 2996.43 | 87.520  | 302005 | 5 | 600.09  | -1.47  |
| Q7Z406 MYH14_HUMAN Myosin-14 | 42 |                      | LQRAQAELENVSGALNEAESK          | 1298 | 21 | 10 | 44.48 | b7°b7b8b10b13*b13y5y11<br>*y11y12 | 2257.15 | 46.040  | 46329  | 3 | 753.05  | 1.62   |
| Q7Z406 MYH14_HUMAN Myosin-14 | 43 | Carbamidomethyl+C(2) | LCRLGLGVTDFSR                  | 399  | 14 | 6  | 30.05 | b3y3°y3y5y7°y7                    | 1606.87 | 56.029  | 27713  | 3 | 536.29  | -2.13  |
| Q7Z406 MYH14_HUMAN Myosin-14 | 44 |                      | DDVGKSVHELER                   | 1537 | 12 | 3  | 25.15 | b6b7y3                            | 1383.69 | 71.099  | 20054  | 2 | 692.35  | 2.47   |
| Q7Z406 MYH14_HUMAN Myosin-14 | 45 |                      | VQELQQSAREVGELQGR              | 880  | 18 | 6  | 23.52 | b4b10b12°b12y6*y6                 | 2055.04 | 105.162 | 18596  | 3 | 685.69  | -6.89  |

|                              |    |                       |                                |      |    |    |       |                                   |         |         |       |   |         |        |
|------------------------------|----|-----------------------|--------------------------------|------|----|----|-------|-----------------------------------|---------|---------|-------|---|---------|--------|
| Q7Z406 MYH14_HUMAN Myosin-14 | 46 |                       | RHEVPPHVYAVTEGAYR              | 166  | 17 | 3  | 22.84 | y3y5y10                           | 1981.03 | 71.774  | 18335 | 2 | 991.02  | 14.11  |
| Q7Z406 MYH14_HUMAN Myosin-14 | 47 |                       | AGRELQTAQAQLSEWR               | 1378 | 16 | 4  | 22.77 | b5y3°y3y4                         | 1843.92 | 51.086  | 13776 | 3 | 615.31  | -11.72 |
| Q7Z406 MYH14_HUMAN Myosin-14 | 48 |                       | QRHGQALGELAELEQAR              | 1215 | 18 | 3  | 21.91 | y8y10y13                          | 2034.02 | 60.609  | 11749 | 2 | 1017.52 | -12.12 |
| Q7Z406 MYH14_HUMAN Myosin-14 | 49 |                       | REQEVTELK                      | 1188 | 9  | 4  | 29.25 | b5b7°b7y4                         | 1131.59 | 27.112  | 8480  | 3 | 377.87  | -12.08 |
| Q7Z406 MYH14_HUMAN Myosin-14 | 50 |                       | RLDGESSELQEQMVEQQQR            | 1075 | 19 | 4  | 19.44 | b3b5y3y9                          | 2290.08 | 56.074  | 7955  | 4 | 573.28  | 3.09   |
| Q7Z406 MYH14_HUMAN Myosin-14 | 51 |                       | LAETETVDR                      | 1424 | 10 | 4  | 40.49 | b3°b3b6b8                         | 1161.63 | 34.343  | 7880  | 2 | 581.32  | 13.77  |
| Q7Z406 MYH14_HUMAN Myosin-14 | 52 | Carbamidomethyl+C(3)  | QACEKMIQALELDPNLYR             | 761  | 18 | 4  | 14.75 | b11y6y11°y11                      | 2192.12 | 85.086  | 7536  | 3 | 731.38  | 14.26  |
| Q7Z406 MYH14_HUMAN Myosin-14 | 53 |                       | SRASISYGSNMRPQSQTWR            | 1038 | 19 | 3  | 14.15 | b15y5y11                          | 2212.07 | 76.243  | 7215  | 3 | 738.03  | 2.98   |
| Q7Z406 MYH14_HUMAN Myosin-14 | 54 |                       | RQEEEAGALEAGEEAR               | 1395 | 16 | 9  | 42.94 | b4°b4b8b11y4y10°y10y12°<br>y12    | 1744.79 | 89.544  | 6141  | 3 | 582.27  | -14.06 |
| Q7Z406 MYH14_HUMAN Myosin-14 | 55 |                       | SFSAKAESGR                     | 1794 | 10 | 9  | 83.69 | b4b5b6b7°b7b9y4°y4y7              | 1039.51 | 28.807  | 5290  | 2 | 520.26  | -8.81  |
| Q7Z406 MYH14_HUMAN Myosin-14 | 56 | Carbamidomethyl+C(9)  | GFMDGKQACEK                    | 755  | 11 | 6  | 50.41 | b6b7b8y3y9°y9                     | 1270.56 | 28.774  | 5065  | 3 | 424.19  | 0.58   |
| Q7Z406 MYH14_HUMAN Myosin-14 | 57 |                       | VAEQAANDLRAQVTELEDELTA<br>EDAK | 1552 | 27 | 5  | 21.66 | b4b6°b6b7y12                      | 2900.43 | 94.775  | 5042  | 3 | 967.48  | 5.05   |
| Q7Z406 MYH14_HUMAN Myosin-14 | 58 |                       | EEELQAALARAEDGEAR              | 1105 | 18 | 5  | 20.44 | b9b12*b12y5y10                    | 1914.94 | 55.172  | 4629  | 3 | 638.98  | 10.39  |
| Q7Z406 MYH14_HUMAN Myosin-14 | 59 |                       | QEEEAGALEAGEEAR                | 1396 | 16 | 3  | 22.77 | b8y7y8                            | 1744.83 | 48.818  | 4536  | 3 | 582.28  | 13.50  |
| Q7Z406 MYH14_HUMAN Myosin-14 | 60 |                       | AELSSLQTARQEGEQR               | 1254 | 16 | 12 | 58.11 | b3b6b7°b7°b7b8°b8y4*y4<br>y6y7*y7 | 1802.90 | 25.393  | 4471  | 3 | 601.64  | 0.27   |
| Q7Z406 MYH14_HUMAN Myosin-14 | 61 |                       | MIQALELDPNLYRQVQSK             | 766  | 18 | 3  | 22.15 | b3b4y5                            | 2075.08 | 113.390 | 4182  | 2 | 1038.05 | -5.41  |
| Q7Z406 MYH14_HUMAN Myosin-14 | 62 |                       | EVGELQGRVAQLEER                | 890  | 16 | 3  | 16.24 | b9y3y6                            | 1841.91 | 102.417 | 4074  | 3 | 614.64  | -13.12 |
| Q7Z406 MYH14_HUMAN Myosin-14 | 63 |                       | AQMASAGQGKEAVK                 | 1647 | 15 | 5  | 24.36 | b4b9y7y10*y10                     | 1504.76 | 39.675  | 4048  | 3 | 502.26  | 9.90   |
| Q7Z406 MYH14_HUMAN Myosin-14 | 64 |                       | ELFQETLESRLVLFSGSHEEISMLR      | 342  | 25 | 3  | 11.89 | b3b5y13                           | 2976.53 | 136.519 | 4013  | 2 | 1488.77 | -7.71  |
| Q7Z406 MYH14_HUMAN Myosin-14 | 65 | Carbamidomethyl+C(20) | QELELVVSELEARVGEESCSR          | 934  | 22 | 4  | 23.1  | b13y3y11y12                       | 2590.20 | 90.440  | 2679  | 2 | 1295.61 | -10.27 |
| Q7Z406 MYH14_HUMAN Myosin-14 | 66 |                       | LEGELEELKAQMASAGQGK            | 1638 | 19 | 3  | 21.93 | b7b8y10                           | 1988.99 | 128.415 | 2487  | 2 | 995.00  | -4.17  |
| Q7Z406 MYH14_HUMAN Myosin-14 | 67 |                       | AESGRQLER                      | 1799 | 10 | 3  | 27.48 | b4b5y9                            | 1173.61 | 67.262  | 1944  | 1 | 1173.61 | 7.70   |
| Q7Z406 MYH14_HUMAN Myosin-14 | 68 |                       | DAEVERDEER                     | 1616 | 10 | 5  | 25.72 | b8°b8y3°y3y9                      | 1247.55 | 31.929  | 1898  | 2 | 624.28  | -0.39  |
| Q7Z406 MYH14_HUMAN Myosin-14 | 69 | Carbamidomethyl+C(6)  | AEAECAEAEETRGR                 | 914  | 15 | 3  | 17.17 | b5y6y9                            | 1691.78 | 118.241 | 1559  | 2 | 846.39  | 8.08   |
| Q7Z406 MYH14_HUMAN Myosin-14 | 70 |                       | HEVPPHVYAVTEGAYRSMLQDR         | 167  | 22 | 4  | 22.66 | b8°b8b9b11                        | 2555.26 | 110.688 | 1534  | 4 | 639.57  | 5.92   |
| Q7Z406 MYH14_HUMAN Myosin-14 | 71 | Phosphoryl STY(4)     | QLVSTLEK                       | 1457 | 8  | 3  | 31.81 | b6y4y5                            | 997.48  | 46.004  | 15094 | 2 | 499.25  | -4.04  |
| Q7Z406 MYH14_HUMAN Myosin-14 | 72 | Phosphoryl STY(16)    | INFDVAGYIVGANIETYLLEK          | 267  | 21 | 5  | 29.55 | b14y7y9y10y13                     | 2422.15 | 62.627  | 8235  | 3 | 808.06  | -13.91 |
| Q7Z406 MYH14_HUMAN Myosin-14 | 73 | Phosphoryl STY(13)    | TSREEIFSQNRESEK                | 1682 | 15 | 4  | 25.25 | b10°b10b12b13                     | 1919.87 | 70.248  | 8125  | 3 | 640.63  | 14.62  |
| Q7Z406 MYH14_HUMAN Myosin-14 | 74 | Phosphoryl STY(8)     | VQELQQSAREVGELQGR              | 880  | 18 | 4  | 27.84 | b4b10y10y11                       | 2135.02 | 97.191  | 2577  | 3 | 712.35  | 4.00   |

|                                       |    |                                                |                                      |      |    |    |        |                                                           |         |         |       |   |         |        |
|---------------------------------------|----|------------------------------------------------|--------------------------------------|------|----|----|--------|-----------------------------------------------------------|---------|---------|-------|---|---------|--------|
| Q7Z406 MYH14_HUMAN Myosin-14          | 75 | Phosphoryl STY(6)                              | TVGQLYKESLSR                         | 668  | 12 | 3  | 28.38  | y5y6y8                                                    | 1460.72 | 28.814  | 1961  | 3 | 487.58  | 9.19   |
| Q7Z406 MYH14_HUMAN Myosin-14          | 76 | Oxidation+M(5)                                 | MQAQMKEWREVEETR                      | 1666 | 16 | 4  | 33.68  | b3b9b10b12                                                | 2080.02 | 83.295  | 17907 | 3 | 694.01  | 14.32  |
| Q7Z406 MYH14_HUMAN Myosin-14          | 77 | Carbamidomethyl+C(13)<br>;Oxidation+M(0)       | SMLQDREDQSILCTGESGAGK                | 183  | 21 | 4  | 13.18  | b11b16*b16y15                                             | 2298.02 | 76.395  | 4770  | 3 | 766.68  | -4.25  |
| Q7Z406 MYH14_HUMAN Myosin-14          | 78 | Oxidation+M(12)                                | ELEDVTESAESMNREVTTLR                 | 1922 | 20 | 4  | 13.63  | b3*b3b15y15                                               | 2325.11 | 89.465  | 2854  | 3 | 775.71  | 8.82   |
| Q7Z406 MYH14_HUMAN Myosin-14          | 79 |                                                | ELQTAQAQLSEWR                        | 1381 | 13 | 5  | 37.48  | b3b5b8b11*b11                                             | 1559.78 | 109.615 | 3296  | 2 | 780.39  | -3.44  |
| Q7Z406 MYH14_HUMAN Myosin-14          | 80 |                                                | LQEELAASDR                           | 1708 | 10 | 0  | 2.25   |                                                           | 1113.55 | 59.028  | 16789 | 2 | 557.28  | -2.74  |
| P08514 ITA2B_HUMAN Integrin alpha-IIb | 1  |                                                | GPHALGAPSLLTGTQLYGR                  | 366  | 20 | 10 | 55.84  | b4b5b9b10y2y4y6*y6y7y2<br>0                               | 2022.10 | 77.060  | 78094 | 3 | 674.71  | -5.67  |
| P08514 ITA2B_HUMAN Integrin alpha-IIb | 2  |                                                | IVLLDVPVR                            | 765  | 9  | 5  | 29.25  | b2b3y4y7y9                                                | 1023.65 | 72.656  | 74224 | 2 | 512.33  | -7.51  |
| P08514 ITA2B_HUMAN Integrin alpha-IIb | 3  | Carbamidomethyl+C(6)                           | AEGQCPSLLFDLR                        | 90   | 14 | 8  | 37.87  | b5b10y2y4*y4y8y11y14                                      | 1562.77 | 78.540  | 72338 | 2 | 781.89  | 2.11   |
| P08514 ITA2B_HUMAN Integrin alpha-IIb | 4  |                                                | SRPSQVLDSPFPTGSAFGFSLR               | 431  | 22 | 8  | 43.64  | b8b9*b9b11y3y6y10y14                                      | 2353.19 | 85.857  | 61132 | 3 | 785.07  | -3.53  |
| P08514 ITA2B_HUMAN Integrin alpha-IIb | 5  |                                                | ALSNVEGFER                           | 692  | 10 | 19 | 116.96 | b2b4b5b7*b7b9*b9y2*y2y4<br>*y4y5y6y7*y7y8*y8y10*y1<br>0   | 1121.56 | 47.071  | 58077 | 2 | 561.28  | 1.74   |
| P08514 ITA2B_HUMAN Integrin alpha-IIb | 6  | Carbamidomethyl+C(4)                           | VVLCELGNPMKK                         | 714  | 12 | 8  | 61.05  | b2b10b11y4y9y10y11y12                                     | 1387.73 | 53.130  | 49452 | 3 | 463.25  | -9.94  |
| P08514 ITA2B_HUMAN Integrin alpha-IIb | 7  |                                                | VAIVVGAPR                            | 63   | 9  | 8  | 72.26  | b2b3y4y5y6y7y8y9                                          | 881.55  | 45.530  | 42635 | 2 | 441.28  | -3.18  |
| P08514 ITA2B_HUMAN Integrin alpha-IIb | 8  |                                                | FGSAIAPLGDLLDRDGYNDIAVAAP<br>YGGPSGR | 386  | 31 | 18 | 81.51  | b1b2b4b5*b5b6b14y6y8y1<br>0y14y15*y15y17*y17y24y<br>25y31 | 3092.52 | 79.226  | 36839 | 3 | 1031.51 | 4.50   |
| P08514 ITA2B_HUMAN Integrin alpha-IIb | 9  | Carbamidomethyl+C(2)                           | SCVLPQTK                             | 502  | 8  | 5  | 34.82  | b2b3b6y4y8                                                | 932.49  | 31.033  | 34319 | 2 | 466.75  | -0.98  |
| P08514 ITA2B_HUMAN Integrin alpha-IIb | 10 |                                                | IYVENDFSWDKR                         | 184  | 12 | 6  | 30.61  | b6*b6b9y3y6y12                                            | 1571.75 | 73.081  | 20837 | 3 | 524.59  | 0.54   |
| P08514 ITA2B_HUMAN Integrin alpha-IIb | 11 |                                                | QIFLPEPEQPSR                         | 890  | 12 | 6  | 21.17  | b11*b11y5y11y12*y12                                       | 1440.73 | 73.731  | 2986  | 2 | 720.87  | -13.56 |
| P08514 ITA2B_HUMAN Integrin alpha-IIb | 12 | Carbamidomethyl+C(6)                           | TPVGSFCFLAQPSGR                      | 155  | 15 | 3  | 25.25  | b5b11b13                                                  | 1605.78 | 60.956  | 1568  | 2 | 803.39  | 7.75   |
| P08514 ITA2B_HUMAN Integrin alpha-IIb | 13 |                                                | VYLFLQPR                             | 358  | 8  | 3  | 31.81  | b6y5y6                                                    | 1035.59 | 71.641  | 47405 | 2 | 518.30  | -4.13  |
| P08514 ITA2B_HUMAN Integrin alpha-IIb | 14 | Carbamidomethyl+C(15)                          | TLGPSQEETGGVFLCPWR                   | 72   | 18 | 9  | 80.44  | b13y3y4y5y6y11*y11y12y1<br>3                              | 2033.99 | 79.807  | 45125 | 2 | 1017.50 | 7.26   |
| P08514 ITA2B_HUMAN Integrin alpha-IIb | 15 |                                                | DGYNDIAVAAPYGGPSGR                   | 399  | 18 | 5  | 25.28  | b11*b11y11y12y15                                          | 1779.86 | 65.717  | 38918 | 3 | 593.96  | 17.15  |
| P08514 ITA2B_HUMAN Integrin alpha-IIb | 16 |                                                | EQNSLDSWGPK                          | 799  | 11 | 4  | 30.14  | y4y7*y7y8                                                 | 1260.60 | 49.454  | 29666 | 2 | 630.80  | 10.36  |
| P08514 ITA2B_HUMAN Integrin alpha-IIb | 17 | Carbamidomethyl+C(5);<br>Carbamidomethyl+C(11) | TPVSCFNQMCVGATGHNPQK                 | 510  | 22 | 7  | 24     | b6b9b13*b13y9y13*y13                                      | 2459.15 | 67.535  | 17680 | 3 | 820.39  | -3.47  |
| P08514 ITA2B_HUMAN Integrin alpha-IIb | 18 | Carbamidomethyl+C(5)                           | HSPICHTTMAFLR                        | 571  | 13 | 4  | 39.81  | b6b7b9b11                                                 | 1570.74 | 46.578  | 16384 | 3 | 524.25  | -13.60 |
| P08514 ITA2B_HUMAN Integrin alpha-IIb | 19 |                                                | AQPVVK                               | 480  | 6  | 1  | 13.2   | b4                                                        | 641.40  | 60.439  | 11079 | 1 | 641.40  | 3.90   |
| P08514 ITA2B_HUMAN Integrin alpha-IIb | 20 |                                                | GNSFPASLVVAEEGER                     | 782  | 17 | 4  | 15.44  | b3*b3b8y13                                                | 1732.88 | 78.121  | 9704  | 2 | 866.94  | 17.75  |
| P08514 ITA2B_HUMAN Integrin alpha-IIb | 21 | Carbamidomethyl+C(3)                           | LICNQK                               | 702  | 6  | 2  | 13.2   | b5*b5                                                     | 775.41  | 26.005  | 6354  | 2 | 388.21  | 1.50   |
| P08514 ITA2B_HUMAN Integrin alpha-IIb | 22 |                                                | IYVENDFSWDK                          | 184  | 11 | 3  | 23.16  | b4b8y7                                                    | 1415.63 | 43.989  | 2533  | 2 | 708.32  | -15.61 |

|                                                         |    |                                                |                                           |     |    |    |       |                                   |         |         |       |   |         |        |
|---------------------------------------------------------|----|------------------------------------------------|-------------------------------------------|-----|----|----|-------|-----------------------------------|---------|---------|-------|---|---------|--------|
| P08514 ITA2B_HUMAN Integrin alpha-IIb                   | 23 |                                                | HDLLVGAPLYMESR                            | 334 | 14 | 4  | 18.27 | b11°b11y5y10                      | 1600.84 | 64.980  | 2504  | 2 | 800.92  | 16.24  |
| P08514 ITA2B_HUMAN Integrin alpha-IIb                   | 24 | Carbamidomethyl+C(4)                           | VVLCELGNPMK                               | 714 | 11 | 5  | 53.88 | b4y5y6y7y8                        | 1259.67 | 19.694  | 2401  | 3 | 420.56  | 16.28  |
| P08514 ITA2B_HUMAN Integrin alpha-IIb                   | 25 |                                                | AEQMASYFGHSVAVTDVNGDGR<br>HDLLVGAPLYMESR  | 312 | 36 | 3  | 16.55 | y8y19y21                          | 3892.79 | 74.178  | 31742 | 4 | 973.95  | -12.67 |
| P08514 ITA2B_HUMAN Integrin alpha-IIb                   | 26 | Carbamidomethyl+C(5);<br>Carbamidomethyl+C(11) | TPVSCFNMQMVGATGHNPQKLS<br>LNAELQLDR       | 510 | 33 | 3  | 10.9  | b10y3y8                           | 3711.83 | 88.511  | 6076  | 3 | 1237.95 | -3.42  |
| P08514 ITA2B_HUMAN Integrin alpha-IIb                   | 27 |                                                | AEAQVELRGNSFPASLVVAEEG<br>ER              | 774 | 25 | 3  | 11.89 | b11b14y12                         | 2629.29 | 84.181  | 5655  | 3 | 877.10  | -11.24 |
| P08514 ITA2B_HUMAN Integrin alpha-IIb                   | 28 |                                                | GNTLSRIYVENDFSWDK                         | 178 | 17 | 8  | 39.17 | b3b4°b4*b4y3y4°y4y12              | 2044.00 | 65.043  | 2842  | 2 | 1022.50 | 9.73   |
| P08514 ITA2B_HUMAN Integrin alpha-IIb                   | 29 |                                                | SKNSQNPNSK                                | 755 | 10 | 5  | 41.19 | b7b8y6y7°y7                       | 1103.53 | 62.707  | 2438  | 2 | 552.27  | -13.16 |
| P08514 ITA2B_HUMAN Integrin alpha-IIb                   | 30 |                                                | LRAEQMASYFGHSVAVTDVNGD<br>GR              | 310 | 24 | 3  | 21.44 | b14y15y16                         | 2580.25 | 93.878  | 2047  | 3 | 860.76  | 9.94   |
| P08514 ITA2B_HUMAN Integrin alpha-IIb                   | 31 |                                                | DETRNVGSQTLQTFK                           | 104 | 15 | 6  | 35.27 | b3b6°b6*b6b7b10                   | 1723.86 | 116.593 | 1772  | 2 | 862.43  | -1.77  |
| P08514 ITA2B_HUMAN Integrin alpha-IIb                   | 32 | Phosphoryl STY(10)                             | HDLLVGAPLYMESR                            | 334 | 14 | 6  | 26.09 | b3°b3b10y3y8°y8                   | 1680.77 | 42.845  | 26263 | 3 | 560.93  | -3.41  |
| P08514 ITA2B_HUMAN Integrin alpha-IIb                   | 33 | Phosphoryl STY(7)                              | GEAQVWTQLLR                               | 977 | 11 | 3  | 26.17 | b5b6y10                           | 1380.65 | 104.187 | 5752  | 1 | 1380.65 | -3.80  |
| P08514 ITA2B_HUMAN Integrin alpha-IIb                   | 34 | Phosphoryl STY(13)                             | SRPSQVLDSFPPTGSAFGFSLR                    | 431 | 22 | 4  | 12.79 | b9*b9b12y8                        | 2433.13 | 136.319 | 3121  | 2 | 1217.07 | -10.23 |
| P08514 ITA2B_HUMAN Integrin alpha-IIb                   | 35 | Carbamidomethyl+C(6);<br>Phosphoryl STY(13)    | TPVGSCFLAQPEGRR                           | 155 | 16 | 5  | 26.94 | b6b11b12°b12y10                   | 1841.81 | 46.529  | 1501  | 2 | 921.41  | -11.00 |
| P08514 ITA2B_HUMAN Integrin alpha-IIb                   | 36 | Carbamidomethyl+C(5);<br>Oxidation+M(9)        | HSPICHTTMAFLRDEADFRDK                     | 571 | 21 | 4  | 17.76 | b3b8y5y8                          | 2563.15 | 42.971  | 47930 | 3 | 855.06  | -12.10 |
| P08514 ITA2B_HUMAN Integrin alpha-IIb                   | 37 | Carbamidomethyl+C(2)                           | QCPSLLFDLR                                | 94  | 10 | 0  | 4.05  |                                   | 1248.64 | 78.575  | 4567  | 2 | 624.82  | 1.47   |
| P08514 ITA2B_HUMAN Integrin alpha-IIb                   | 38 |                                                | IVVGAPR                                   | 65  | 7  | 0  | 1.8   |                                   | 711.45  | 45.546  | 3038  | 1 | 711.45  | 4.98   |
| P08514 ITA2B_HUMAN Integrin alpha-IIb                   | 39 |                                                | ALSNVEGFE                                 | 692 | 9  | 0  | 2.25  |                                   | 965.46  | 47.106  | 1723  | 2 | 483.23  | -0.06  |
| P11142 HSP7C_HUMAN Heat shock<br>cognate 71 kDa protein | 1  |                                                | IINEPTAAAIAYGLDKK                         | 171 | 17 | 7  | 35.38 | b2y2y5y10y13y15y17                | 1787.97 | 64.158  | 66970 | 3 | 596.66  | -9.01  |
| P11142 HSP7C_HUMAN Heat shock<br>cognate 71 kDa protein | 2  |                                                | VEIANDQGNR                                | 25  | 11 | 12 | 97.68 | b2b3b4y4*y4y6y7y8y9°y9y<br>10y11  | 1228.63 | 35.212  | 65264 | 2 | 614.82  | 0.10   |
| P11142 HSP7C_HUMAN Heat shock<br>cognate 71 kDa protein | 3  |                                                | TTPSYVAFTDTER                             | 36  | 13 | 9  | 92.82 | b1y3y4y5y6y7y9y11y13              | 1487.70 | 54.288  | 61045 | 2 | 744.35  | 0.74   |
| P11142 HSP7C_HUMAN Heat shock<br>cognate 71 kDa protein | 4  |                                                | NSLESYAFNMK                               | 539 | 11 | 8  | 30.14 | b2°b2*b2y2y3y7y8y11               | 1303.61 | 63.821  | 31315 | 2 | 652.31  | 5.99   |
| P11142 HSP7C_HUMAN Heat shock<br>cognate 71 kDa protein | 5  |                                                | TVTNAVVTVPAYFNDSQR                        | 137 | 18 | 9  | 52.61 | b5y3*y3y9°y9y10y11y12y1<br>8      | 1982.01 | 68.238  | 27637 | 2 | 991.51  | 5.97   |
| P11142 HSP7C_HUMAN Heat shock<br>cognate 71 kDa protein | 6  |                                                | NQVAMNPTNTVFDK                            | 56  | 15 | 6  | 28    | b3y3y11°y11y12y15                 | 1649.80 | 56.660  | 23269 | 2 | 825.41  | 5.70   |
| P11142 HSP7C_HUMAN Heat shock<br>cognate 71 kDa protein | 7  |                                                | STAGDTHLGGEDFDNR                          | 220 | 16 | 6  | 22.77 | b2°b2b12y8y9y16                   | 1691.72 | 37.451  | 22871 | 3 | 564.58  | -4.04  |
| P11142 HSP7C_HUMAN Heat shock<br>cognate 71 kDa protein | 8  |                                                | GTLDPVEK                                  | 311 | 8  | 5  | 31.81 | b4°b4b5y6y8                       | 858.45  | 31.930  | 22015 | 2 | 429.73  | -12.51 |
| P11142 HSP7C_HUMAN Heat shock<br>cognate 71 kDa protein | 9  |                                                | SINPDEAVAYGAAVQAAILSGDK                   | 361 | 23 | 6  | 22.53 | b1b6b14°b14b15y2                  | 2260.16 | 68.599  | 9853  | 4 | 565.79  | 4.64   |
| P11142 HSP7C_HUMAN Heat shock<br>cognate 71 kDa protein | 10 |                                                | LYQSAGGMPGGMPGGFPGGGAP<br>PSGGASSGPTIEEVD | 609 | 37 | 9  | 33.97 | b7°b7b13°b13b14°b14b15*<br>b15y15 | 3346.50 | 124.671 | 8287  | 4 | 837.38  | 1.68   |
| P11142 HSP7C_HUMAN Heat shock<br>cognate 71 kDa protein | 11 |                                                | QTQTFTTYSNQPGLVLIQVYEGER                  | 423 | 24 | 5  | 15.83 | b3b5y4°y4y7                       | 2774.29 | 76.659  | 6516  | 3 | 925.44  | -11.53 |

|                                                         |    |                       |                                   |     |    |    |        |                                 |         |         |        |   |         |        |
|---------------------------------------------------------|----|-----------------------|-----------------------------------|-----|----|----|--------|---------------------------------|---------|---------|--------|---|---------|--------|
| [P11142]HSP7C_HUMAN Heat shock cognate 71 kDa protein   | 12 |                       | FDDAVVQSDMK                       | 77  | 11 | 4  | 23.16  | b7°b7y3y6                       | 1254.58 | 74.469  | 2723   | 3 | 418.87  | 13.04  |
| [P11142]HSP7C_HUMAN Heat shock cognate 71 kDa protein   | 13 |                       | FELTGIPPAPR                       | 458 | 11 | 3  | 30.14  | b5b6b9                          | 1197.65 | 42.566  | 128985 | 2 | 599.33  | -13.96 |
| [P11142]HSP7C_HUMAN Heat shock cognate 71 kDa protein   | 14 |                       | SFYPEEVSSMVLTK                    | 112 | 14 | 3  | 18.27  | b7b13y9                         | 1616.79 | 76.336  | 28349  | 2 | 808.90  | 3.78   |
| [P11142]HSP7C_HUMAN Heat shock cognate 71 kDa protein   | 15 |                       | DAGTIAGLNVLR                      | 159 | 12 | 4  | 31.39  | b3b5°b5b7                       | 1199.67 | 71.724  | 19146  | 2 | 600.34  | -1.02  |
| [P11142]HSP7C_HUMAN Heat shock cognate 71 kDa protein   | 16 |                       | SQIHDIVLVGGSTR                    | 328 | 14 | 3  | 18.27  | b7b13y5                         | 1481.80 | 51.940  | 13639  | 2 | 741.40  | -4.70  |
| [P11142]HSP7C_HUMAN Heat shock cognate 71 kDa protein   | 17 |                       | MVNHFAIEFK                        | 236 | 10 | 4  | 46.24  | b4b6b8y4                        | 1235.62 | 38.588  | 6099   | 2 | 618.32  | 0.40   |
| [P11142]HSP7C_HUMAN Heat shock cognate 71 kDa protein   | 18 |                       | TLSSSTQASIEIDSLYEGIDFYTSITR       | 272 | 27 | 5  | 16.88  | b4b9°b9b12y7                    | 2997.41 | 87.529  | 2586   | 6 | 500.41  | -14.66 |
| [P11142]HSP7C_HUMAN Heat shock cognate 71 kDa protein   | 19 |                       | QTQTFTTYSNDQPGVLIQVYEGERAMTK      | 423 | 28 | 3  | 11.33  | b7y3y10                         | 3205.57 | 79.356  | 243861 | 4 | 802.15  | 7.77   |
| [P11142]HSP7C_HUMAN Heat shock cognate 71 kDa protein   | 20 |                       | GTLDPVEKALR                       | 311 | 11 | 4  | 30.14  | b4b5°b5b10                      | 1198.68 | 55.954  | 171774 | 3 | 400.23  | 3.36   |
| [P11142]HSP7C_HUMAN Heat shock cognate 71 kDa protein   | 21 |                       | GETKSFYPEEVSSMVLTK                | 108 | 18 | 4  | 33.61  | b3b8b11b13                      | 2032.00 | 51.872  | 19713  | 3 | 678.00  | 1.80   |
| [P11142]HSP7C_HUMAN Heat shock cognate 71 kDa protein   | 22 | Carbamidomethyl+C(14) | GPAVIGDLGTTYSYCVGVFQHGKVEIANDQGNR | 3   | 33 | 4  | 12.67  | b5b12y7y10                      | 3472.70 | 79.181  | 12827  | 4 | 868.93  | -6.68  |
| [P11142]HSP7C_HUMAN Heat shock cognate 71 kDa protein   | 23 |                       | FDDAVVQSDMKHWPFMVVNDAGRPK         | 77  | 25 | 4  | 26.21  | b5b7b12b17                      | 2889.34 | 56.014  | 5446   | 3 | 963.78  | -14.53 |
| [P11142]HSP7C_HUMAN Heat shock cognate 71 kDa protein   | 24 |                       | RFDDAVVQSDMK                      | 76  | 12 | 7  | 58.43  | b7y4y7y9°y9y11°y11              | 1410.67 | 44.150  | 5091   | 2 | 705.84  | 1.12   |
| [P11142]HSP7C_HUMAN Heat shock cognate 71 kDa protein   | 25 | Carbamidomethyl+C(16) | SKGPAVIGDLGTTYSYCVGVFQHGK         | 1   | 24 | 10 | 44.57  | b4b16y7y11°y11y14°y14y15y16*y16 | 2478.25 | 98.898  | 2942   | 3 | 826.75  | 0.69   |
| [P11142]HSP7C_HUMAN Heat shock cognate 71 kDa protein   | 26 |                       | EIAEAYLGKTVTNAVVTVPAYFNDTSQR      | 128 | 27 | 4  | 11.49  | b8°b8y6y10                      | 2956.51 | 136.314 | 1718   | 3 | 986.17  | 1.65   |
| [P11142]HSP7C_HUMAN Heat shock cognate 71 kDa protein   | 27 | Phosphoryl STY(10)    | SINPDEAVAYGAAVQAAILSGDK           | 361 | 23 | 3  | 12.44  | b8b15y15                        | 2340.07 | 86.936  | 4570   | 2 | 1170.54 | -12.94 |
| [P11142]HSP7C_HUMAN Heat shock cognate 71 kDa protein   | 28 | Phosphoryl STY()      | NTTIPTK                           | 416 | 7  | 6  | 54.89  | b3b4°b4°b4y3y5                  | 854.40  | 70.180  | 3503   | 1 | 854.40  | 10.64  |
| [P11142]HSP7C_HUMAN Heat shock cognate 71 kDa protein   | 29 | Oxidation+M(5)        | NQVAMNPNTVFDAGR                   | 56  | 16 | 5  | 24.61  | y5y14*y14y15°y15                | 1821.89 | 71.022  | 15694  | 3 | 607.97  | 1.34   |
| [P19105]MRLC3_HUMAN Myosin regulatory light chain MRLC3 | 1  |                       | LNGTDPEDVIR                       | 92  | 11 | 9  | 79.18  | y1y3y4y5y6y8y9°y9y11            | 1228.62 | 47.884  | 118590 | 2 | 614.81  | 2.98   |
| [P19105]MRLC3_HUMAN Myosin regulatory light chain MRLC3 | 2  |                       | GNFNIEFTR                         | 150 | 10 | 12 | 104.22 | b2°b2b3b6b9y4°y4y5y6°y6y7y8     | 1260.61 | 66.202  | 87893  | 2 | 630.81  | 3.68   |
| [P19105]MRLC3_HUMAN Myosin regulatory light chain MRLC3 | 3  |                       | ATSNVFAMFDQSQIQEFK                | 16  | 18 | 6  | 27.84  | b4b5y2y4y10y18                  | 2091.00 | 89.191  | 58630  | 2 | 1046.00 | 5.49   |
| [P19105]MRLC3_HUMAN Myosin regulatory light chain MRLC3 | 4  |                       | FTDEEVDLYR                        | 132 | 11 | 6  | 45.9   | y5y7y8°y8y9y11                  | 1415.64 | 58.563  | 41139  | 2 | 708.32  | 7.07   |
| [P19105]MRLC3_HUMAN Myosin regulatory light chain MRLC3 | 5  |                       | ELLTTMGDR                         | 123 | 9  | 6  | 52.78  | b9y3y5y6y7y9                    | 1035.52 | 47.932  | 36626  | 2 | 518.26  | 1.18   |
| [P19105]MRLC3_HUMAN Myosin regulatory light chain MRLC3 | 6  |                       | ELLTTMGDRFTDEEVDLYR               | 123 | 20 | 6  | 28.95  | b4b7b8y4°y4y7                   | 2432.12 | 114.868 | 37209  | 3 | 811.38  | -4.22  |
| [P19105]MRLC3_HUMAN Myosin regulatory light chain MRLC3 | 7  |                       | KGNFNIEFTR                        | 149 | 11 | 3  | 23.16  | b5y3y6                          | 1388.70 | 36.348  | 13968  | 2 | 694.86  | 5.10   |
| [P19105]MRLC3_HUMAN Myosin regulatory light chain MRLC3 | 8  | Oxidation+M()         | ATSNVFAMFDQSQIQEFK                | 16  | 18 | 5  | 31.27  | y7y13y14y16°y16                 | 2106.95 | 68.554  | 3854   | 3 | 702.99  | -14.83 |
| [O14950]MRLC2_HUMAN Myosin regulatory light chain MRLC2 | 1  |                       | LNGTDPEDVIR                       | 93  | 11 | 9  | 79.18  | y1y3y4y5y6y8y9°y9y11            | 1228.62 | 47.884  | 118590 | 2 | 614.81  | 2.98   |
| [O14950]MRLC2_HUMAN Myosin regulatory light chain MRLC2 | 2  |                       | GNFNIEFTR                         | 151 | 10 | 12 | 104.22 | b2°b2b3b6b9y4°y4y5y6°y6y7y8     | 1260.61 | 66.202  | 87893  | 2 | 630.81  | 3.68   |
| [O14950]MRLC2_HUMAN Myosin regulatory light chain MRLC2 | 3  |                       | ATSNVFAMFDQSQIQEFK                | 17  | 18 | 6  | 27.84  | b4b5y2y4y10y18                  | 2091.00 | 89.191  | 58630  | 2 | 1046.00 | 5.49   |

|                                                        |    |                                             |                                |     |    |    |       |                                            |         |         |        |   |         |        |
|--------------------------------------------------------|----|---------------------------------------------|--------------------------------|-----|----|----|-------|--------------------------------------------|---------|---------|--------|---|---------|--------|
| O14950 MRLC2_HUMAN Myosin regulatory light chain MRLC2 | 4  |                                             | FTDEEVDELYR                    | 133 | 11 | 6  | 45.9  | y5y7y8°y8y9y11                             | 1415.64 | 58.563  | 41139  | 2 | 708.32  | 7.07   |
| O14950 MRLC2_HUMAN Myosin regulatory light chain MRLC2 | 5  |                                             | ELLTTMGDR                      | 124 | 9  | 6  | 52.78 | b9y3y5y6y7y9                               | 1035.52 | 47.932  | 36626  | 2 | 518.26  | 1.18   |
| O14950 MRLC2_HUMAN Myosin regulatory light chain MRLC2 | 6  |                                             | NPTDAYLDAMMNEAPGPNFTMF LTMFGEK | 63  | 30 | 5  | 15.77 | b12y10y12°y12y17                           | 3366.55 | 101.473 | 2670   | 3 | 1122.85 | 8.63   |
| O14950 MRLC2_HUMAN Myosin regulatory light chain MRLC2 | 7  | Oxidation+M()                               | DGFIDKEDLHDM LASL GK           | 45  | 18 | 5  | 23.52 | b7°b7y3y9y13                               | 2019.95 | 77.048  | 2247   | 2 | 1010.48 | -9.43  |
| Q13748 TBA3C_HUMAN Tubulin alpha-3C/D chain            | 1  |                                             | VGINYQPPTVVPGDLAK              | 352 | 18 | 16 | 67.07 | b4*b4b5*b5b6*b6b7*b7b11°b11y1y2y8y12y14y18 | 1825.00 | 64.922  | 216139 | 2 | 913.00  | 5.55   |
| Q13748 TBA3C_HUMAN Tubulin alpha-3C/D chain            | 2  |                                             | NLDIERPTYTNLNR                 | 215 | 14 | 16 | 60.05 | b2*b2b3°b3b5°b5b7y2y4*y4y7y8y12*y12y14*y14 | 1718.86 | 51.755  | 209644 | 3 | 573.63  | -11.43 |
| Q13748 TBA3C_HUMAN Tubulin alpha-3C/D chain            | 3  |                                             | QLFHPEQLITGKEDAANNYAR          | 84  | 21 | 11 | 53.17 | b6*b6y2y3y5y6y7y9y12y21*y21                | 2415.17 | 61.209  | 194281 | 4 | 604.55  | -13.34 |
| Q13748 TBA3C_HUMAN Tubulin alpha-3C/D chain            | 4  | Carbamidomethyl+C(3)                        | AVCMLSNTTAIAEAWAR              | 373 | 17 | 7  | 37.33 | b8y4y8y11°y11*y11y16                       | 1864.91 | 83.137  | 85045  | 2 | 932.96  | 3.34   |
| Q13748 TBA3C_HUMAN Tubulin alpha-3C/D chain            | 5  |                                             | DVNAAIATIK                     | 326 | 10 | 6  | 37.67 | b3b8y1y6y8y10                              | 1015.57 | 51.251  | 84912  | 2 | 508.29  | -4.69  |
| Q13748 TBA3C_HUMAN Tubulin alpha-3C/D chain            | 6  | Carbamidomethyl+C(15)                       | AYHEQLSVAEITNACFEPANQMV K      | 280 | 24 | 7  | 32.35 | b10b11b14y1y7y11y13                        | 2750.30 | 72.595  | 73730  | 3 | 917.44  | 4.79   |
| Q13748 TBA3C_HUMAN Tubulin alpha-3C/D chain            | 7  |                                             | FDGALNVDLTFEQTNLVPYPR          | 243 | 21 | 11 | 54.9  | b2b3b4b16b17b21y2y4y5y11y21                | 2409.22 | 93.917  | 46804  | 2 | 1205.11 | 3.75   |
| Q13748 TBA3C_HUMAN Tubulin alpha-3C/D chain            | 8  |                                             | LSVDYGKK                       | 156 | 8  | 5  | 39.59 | b2y4y5y7y8                                 | 909.50  | 28.259  | 28744  | 2 | 455.25  | -6.64  |
| Q13748 TBA3C_HUMAN Tubulin alpha-3C/D chain            | 9  | Carbamidomethyl+C(15);Oxidation+M()         | AYHEQLSVAEITNACFEPANQMV K      | 280 | 24 | 8  | 28.37 | b6°b6b13*b13b16y4y6y8                      | 2766.31 | 62.042  | 47474  | 3 | 922.78  | 9.88   |
| Q13748 TBA3C_HUMAN Tubulin alpha-3C/D chain            | 10 | Oxidation+M()                               | AFVHWYVVEGMEEGEFSEAREDL AALEK  | 402 | 28 | 5  | 25.12 | b3b9b10b13y4                               | 3215.44 | 91.525  | 3075   | 3 | 1072.49 | -6.30  |
| Q13748 TBA3C_HUMAN Tubulin alpha-3C/D chain            | 11 |                                             | SVDYGKK                        | 157 | 7  | 0  | 1.35  |                                            | 796.41  | 28.241  | 10890  | 2 | 398.71  | -6.82  |
| Q9NY65 TBA8_HUMAN Tubulin alpha-8 chain                | 1  |                                             | VGINYQPPTVVPGDLAK              | 352 | 18 | 16 | 67.07 | b4*b4b5*b5b6*b6b7*b7b11°b11y1y2y8y12y14y18 | 1825.00 | 64.922  | 216139 | 2 | 913.00  | 5.55   |
| Q9NY65 TBA8_HUMAN Tubulin alpha-8 chain                | 2  |                                             | NLDIERPTYTNLNR                 | 215 | 14 | 16 | 60.05 | b2*b2b3°b3b5°b5b7y2y4*y4y7y8y12*y12y14*y14 | 1718.86 | 51.755  | 209644 | 3 | 573.63  | -11.43 |
| Q9NY65 TBA8_HUMAN Tubulin alpha-8 chain                | 3  |                                             | QLFHPEQLITGKEDAANNYAR          | 84  | 21 | 11 | 53.17 | b6*b6y2y3y5y6y7y9y12y21*y21                | 2415.17 | 61.209  | 194281 | 4 | 604.55  | -13.34 |
| Q9NY65 TBA8_HUMAN Tubulin alpha-8 chain                | 4  | Carbamidomethyl+C(3)                        | AVCMLSNTTAIAEAWAR              | 373 | 17 | 7  | 37.33 | b8y4y8y11°y11*y11y16                       | 1864.91 | 83.137  | 85045  | 2 | 932.96  | 3.34   |
| Q9NY65 TBA8_HUMAN Tubulin alpha-8 chain                | 5  |                                             | FDGALNVDLTFEQTNLVPYPR          | 243 | 21 | 11 | 54.9  | b2b3b4b16b17b21y2y4y5y11y21                | 2409.22 | 93.917  | 46804  | 2 | 1205.11 | 3.75   |
| Q9NY65 TBA8_HUMAN Tubulin alpha-8 chain                | 6  |                                             | LISQIVSSITASLR                 | 229 | 14 | 5  | 18.27 | b5°b5y4y8y14                               | 1487.88 | 99.046  | 34411  | 2 | 744.44  | 1.80   |
| Q9NY65 TBA8_HUMAN Tubulin alpha-8 chain                | 7  |                                             | AVMIDLEPTVVDEVR                | 64  | 15 | 4  | 17.17 | b7y2y8y11                                  | 1685.88 | 78.393  | 25471  | 2 | 843.44  | 0.36   |
| Q9NY65 TBA8_HUMAN Tubulin alpha-8 chain                | 8  |                                             | INDDSFSTFFSETGNGK              | 42  | 18 | 5  | 33.61 | y6y10y12*y12y14                            | 1994.87 | 51.250  | 6097   | 3 | 665.63  | 5.57   |
| Q9NY65 TBA8_HUMAN Tubulin alpha-8 chain                | 9  | Carbamidomethyl+C(15);Carbamidomethyl+C(25) | AYHEQLSVAEITSSCFEPNSQMVK CDPR  | 280 | 28 | 8  | 26.33 | b3b5b7b9°b9y5y11°y11                       | 3283.45 | 80.409  | 8726   | 4 | 821.62  | -8.18  |
| Q9NY65 TBA8_HUMAN Tubulin alpha-8 chain                | 10 | Carbamidomethyl+C(5);Oxidation+M(30)        | LTDACSLQGFLIFHSFGGGTGSFTSLLMER | 124 | 32 | 6  | 22.97 | b12b13°b13b16y6y12                         | 3379.62 | 90.408  | 5967   | 3 | 1127.21 | 4.70   |
| Q9NY65 TBA8_HUMAN Tubulin alpha-8 chain                | 11 |                                             | DIERPTYTNLNR                   | 217 | 12 | 5  | 26.85 | b4°b4b9b11*b11                             | 1491.75 | 51.719  | 13650  | 2 | 746.38  | -3.36  |



|                                         |    |                       |                            |     |    |    |        |                                                                            |         |         |        |   |         |        |
|-----------------------------------------|----|-----------------------|----------------------------|-----|----|----|--------|----------------------------------------------------------------------------|---------|---------|--------|---|---------|--------|
| Q9NY65 TBA8_HUMAN Tubulin alpha-8 chain | 12 |                       | PGGD LAK                   | 363 | 7  | 4  | 23.67  | b3b5b6°b6                                                                  | 657.35  | 64.919  | 2997   | 2 | 329.18  | -12.35 |
| O43707 ACTN4_HUMAN Alpha-actinin-4      | 1  |                       | VGWEQLLTIAR                | 733 | 12 | 18 | 148.32 | b3b4b5°b5b6°b6b8y1y2y3y4y5y6°y6y7y8y9y12                                   | 1386.77 | 97.027  | 222796 | 2 | 693.89  | -1.06  |
| O43707 ACTN4_HUMAN Alpha-actinin-4      | 2  |                       | AIMTYVSSFYHAFSGAQK         | 255 | 18 | 26 | 135.57 | b2b5°b5b13b15y1y2*y2y4*y4y5y6°y6y7y8y10°y10y11y12°y12*y12y13y16°y16*y16y18 | 2007.95 | 89.488  | 161074 | 3 | 669.99  | -7.23  |
| O43707 ACTN4_HUMAN Alpha-actinin-4      | 3  |                       | TINEVENQILTR               | 745 | 12 | 12 | 72.83  | b2°b2b3b10*b10y1y3y4y5y6y10y12                                             | 1429.77 | 59.074  | 115237 | 2 | 715.39  | 4.95   |
| O43707 ACTN4_HUMAN Alpha-actinin-4      | 4  | Carbamidomethyl+C(7)  | EGLLLWCQR                  | 166 | 9  | 5  | 43.75  | b8y3y5y6y9                                                                 | 1174.60 | 75.268  | 47346  | 2 | 587.80  | -1.87  |
| O43707 ACTN4_HUMAN Alpha-actinin-4      | 5  |                       | HEAFESDLAAHQDR             | 455 | 14 | 13 | 76.47  | b2b3°b3b5b8b10y4y9*y9y10*y10y12y14                                         | 1625.72 | 35.568  | 28234  | 3 | 542.58  | -5.03  |
| O43707 ACTN4_HUMAN Alpha-actinin-4      | 6  |                       | LMLLLEVISGER               | 83  | 12 | 3  | 28.38  | y3y4y6                                                                     | 1372.78 | 105.908 | 4821   | 2 | 686.90  | -1.69  |
| O43707 ACTN4_HUMAN Alpha-actinin-4      | 7  |                       | GYEEWLLNEIR                | 395 | 11 | 3  | 23.16  | b7b10y3                                                                    | 1421.70 | 86.438  | 4401   | 1 | 1421.70 | -5.75  |
| O43707 ACTN4_HUMAN Alpha-actinin-4      | 8  | Carbamidomethyl+C(11) | RELPPDQAEYCIAR             | 868 | 14 | 4  | 18.27  | b2b9y5y9                                                                   | 1717.83 | 44.922  | 2129   | 2 | 859.42  | -2.42  |
| O43707 ACTN4_HUMAN Alpha-actinin-4      | 9  |                       | GISQEQMQEFR                | 760 | 11 | 5  | 34.92  | b2b5b8b10y11                                                               | 1352.64 | 53.327  | 2079   | 2 | 676.82  | 10.92  |
| O43707 ACTN4_HUMAN Alpha-actinin-4      | 10 |                       | AGTQIENIDEDFR              | 66  | 13 | 5  | 41.1   | b3b5b8y4y6                                                                 | 1507.70 | 31.962  | 22168  | 2 | 754.35  | -1.54  |
| O43707 ACTN4_HUMAN Alpha-actinin-4      | 11 |                       | ETD TDTADQVIASF K          | 837 | 16 | 3  | 22.77  | b13b14y3                                                                   | 1741.84 | 84.826  | 14183  | 3 | 581.28  | 13.32  |
| O43707 ACTN4_HUMAN Alpha-actinin-4      | 12 |                       | MLDAEDIVNTARPDEK           | 239 | 16 | 3  | 24.61  | y3y5y6                                                                     | 1816.88 | 61.840  | 13885  | 3 | 606.30  | 1.61   |
| O43707 ACTN4_HUMAN Alpha-actinin-4      | 13 |                       | DDPVTNLNNAFEVAEK           | 217 | 16 | 4  | 35.98  | b14y9y10y11                                                                | 1775.86 | 61.503  | 13074  | 3 | 592.63  | 10.79  |
| O43707 ACTN4_HUMAN Alpha-actinin-4      | 14 |                       | VEQIAAIAQELNELDYD SHNVNTR  | 469 | 25 | 5  | 11.89  | b4°b4b13y10*y10                                                            | 2905.40 | 118.182 | 8674   | 3 | 969.14  | -0.17  |
| O43707 ACTN4_HUMAN Alpha-actinin-4      | 15 |                       | MVSDINNGWQHLEQA EK         | 378 | 17 | 8  | 40.29  | b3b6b10y4°y4y8y10*y10                                                      | 1998.90 | 41.783  | 5957   | 3 | 666.97  | -18.99 |
| O43707 ACTN4_HUMAN Alpha-actinin-4      | 16 |                       | LSNRPAFMPSEGK              | 365 | 13 | 12 | 76.02  | b3b6b11°b11b12°b12y4y5y7°y7y9°y9                                           | 1433.72 | 97.015  | 5927   | 2 | 717.36  | -1.96  |
| O43707 ACTN4_HUMAN Alpha-actinin-4      | 17 |                       | INN VNK                    | 108 | 6  | 1  | 13.2   | b3                                                                         | 701.39  | 40.624  | 3925   | 2 | 351.20  | -9.57  |
| O43707 ACTN4_HUMAN Alpha-actinin-4      | 18 | Carbamidomethyl+C(10) | ELPPDQAEYCIAR              | 869 | 13 | 5  | 28.83  | y4y6y8°y8*y8                                                               | 1561.75 | 55.918  | 3920   | 2 | 781.38  | 14.69  |
| O43707 ACTN4_HUMAN Alpha-actinin-4      | 19 |                       | LVSIGAEIIVDGNAK            | 125 | 15 | 8  | 38.02  | b7y5*y5y9°y9*y9y11y12                                                      | 1514.78 | 79.280  | 3401   | 2 | 757.89  | -18.53 |
| O43707 ACTN4_HUMAN Alpha-actinin-4      | 20 | Carbamidomethyl+C(2)  | ACLISLGYDVENDR             | 791 | 14 | 9  | 53.71  | b4b9°b9b10°b10b13y11y12°y12                                                | 1624.78 | 62.030  | 3037   | 4 | 406.95  | 7.59   |
| O43707 ACTN4_HUMAN Alpha-actinin-4      | 21 | Carbamidomethyl+C(14) | DHGGALGPEEFKACLISLGYDVENDR | 779 | 26 | 5  | 14.85  | b6b13y12*y12y22                                                            | 2862.32 | 93.629  | 7794   | 3 | 954.78  | -4.18  |
| O43707 ACTN4_HUMAN Alpha-actinin-4      | 22 |                       | TAPYKNVNVQNFHISWK          | 176 | 17 | 6  | 21.57  | b3b5°b5y5°y5y7                                                             | 2046.03 | 56.070  | 5378   | 3 | 682.68  | -14.20 |
| O43707 ACTN4_HUMAN Alpha-actinin-4      | 23 |                       | DAKGISQEQMQEFR             | 757 | 14 | 8  | 43.46  | b4°b4b8b9°b9b10°b10y4                                                      | 1666.79 | 45.990  | 3353   | 3 | 556.27  | 3.15   |
| O43707 ACTN4_HUMAN Alpha-actinin-4      | 24 |                       | KDDPVTNLNNAFEVAEK          | 216 | 17 | 3  | 15.44  | b11b14y9                                                                   | 1903.92 | 60.939  | 2134   | 2 | 952.46  | -12.76 |
| O43707 ACTN4_HUMAN Alpha-actinin-4      | 25 | Phosphoryl STY(14)    | IMSLVDPNHSGLVTFQAFIDFMSR   | 813 | 24 | 6  | 22.1   | b10b14_H3PO4<br>b14°b14b20y9y13                                            | 2805.27 | 76.438  | 5537   | 2 | 1403.14 | -13.49 |
| O43707 ACTN4_HUMAN Alpha-actinin-4      | 26 | Phosphoryl STY(10)    | HRDYETATLSDIK              | 437 | 13 | 4  | 41.57  | b5b7b8b9                                                                   | 1628.74 | 81.884  | 5505   | 2 | 814.87  | 10.94  |

|                                                 |    |                       |                                    |     |    |    |        |                                                  |         |         |        |   |         |        |
|-------------------------------------------------|----|-----------------------|------------------------------------|-----|----|----|--------|--------------------------------------------------|---------|---------|--------|---|---------|--------|
| O43707 ACTN4_HUMAN Alpha-actinin-4              | 27 | Oxidation+M()         | LSNRPAFMPEGK                       | 365 | 13 | 5  | 61.31  | y3y6y8y11y12                                     | 1449.71 | 86.299  | 5153   | 2 | 725.36  | -4.80  |
| O43707 ACTN4_HUMAN Alpha-actinin-4              | 28 | Oxidation+M()         | AIMTYVSSFYHAFSGAQK                 | 255 | 18 | 3  | 14.75  | b7b12y10                                         | 2023.96 | 59.603  | 1920   | 2 | 1012.49 | 3.08   |
| O00151 PDLI1_HUMAN PDZ and LIM domain protein 1 | 1  | Carbamidomethyl+C(7)  | AALANLCIGDVIT AIDGENTS NMT HLEAQRN | 38  | 31 | 19 | 112.66 | b1b3b4b5*b5y3*y3y4*y4y5*y5y6y7y11y15y23y25y26y31 | 3312.58 | 94.820  | 49955  | 3 | 1104.87 | -3.17  |
| O00151 PDLI1_HUMAN PDZ and LIM domain protein 1 | 2  |                       | MTTQQIDLQGGPWGFR                   | 0   | 17 | 4  | 24.8   | b8b13b16y5                                       | 1931.97 | 85.465  | 6653   | 3 | 644.66  | 12.32  |
| O00151 PDLI1_HUMAN PDZ and LIM domain protein 1 | 3  | Carbamidomethyl+C(11) | GHFFVEDQIYCEK                      | 296 | 13 | 3  | 19.58  | b8b11y5                                          | 1671.77 | 88.990  | 2033   | 3 | 557.93  | 13.73  |
| O00151 PDLI1_HUMAN PDZ and LIM domain protein 1 | 4  |                       | TTQQIDLQGGPWGFR                    | 1   | 16 | 3  | 16.24  | b11b13y5                                         | 1800.90 | 65.024  | 1803   | 3 | 600.97  | -3.12  |
| O00151 PDLI1_HUMAN PDZ and LIM domain protein 1 | 5  |                       | VTPPEGYEVVTVFPK                    | 314 | 15 | 4  | 17.17  | b9b12*b12y13                                     | 1661.88 | 72.260  | 59197  | 2 | 831.44  | 1.69   |
| O00151 PDLI1_HUMAN PDZ and LIM domain protein 1 | 6  |                       | VITNQYNNPAGLYSSENISNFNNA LESK      | 138 | 28 | 3  | 11.33  | b14y8y15                                         | 3101.49 | 74.829  | 51915  | 4 | 776.13  | 2.05   |
| O00151 PDLI1_HUMAN PDZ and LIM domain protein 1 | 7  |                       | SAMPFTASPASSTTAR                   | 122 | 16 | 5  | 33.68  | y7y8y11y13°y13                                   | 1582.76 | 49.413  | 17596  | 2 | 791.88  | 5.17   |
| O00151 PDLI1_HUMAN PDZ and LIM domain protein 1 | 8  |                       | MNLASEPQEV LHIGSAHNR               | 103 | 19 | 7  | 57.03  | b4y3y6y7y8y10y13                                 | 2103.04 | 61.206  | 16654  | 3 | 701.69  | 1.86   |
| O00151 PDLI1_HUMAN PDZ and LIM domain protein 1 | 9  | Carbamidomethyl+C(4)  | LPMCDK                             | 256 | 6  | 1  | 13.2   | b3                                               | 763.36  | 83.814  | 7580   | 1 | 763.36  | 9.51   |
| O00151 PDLI1_HUMAN PDZ and LIM domain protein 1 | 10 |                       | QSTSFLVLQEI LESEEK                 | 211 | 17 | 3  | 15.44  | b9y12y15                                         | 1980.04 | 90.281  | 7415   | 3 | 660.68  | 9.25   |
| O00151 PDLI1_HUMAN PDZ and LIM domain protein 1 | 11 |                       | VWSPLVTEEGK                        | 87  | 11 | 5  | 35.11  | b3*b3b4b10y4                                     | 1244.64 | 43.578  | 2627   | 2 | 622.82  | -13.63 |
| O00151 PDLI1_HUMAN PDZ and LIM domain protein 1 | 12 |                       | LVGGKDFEQPLAISR                    | 17  | 15 | 3  | 25.25  | y4y6y10                                          | 1629.89 | 57.880  | 37730  | 3 | 543.97  | -4.57  |
| O00151 PDLI1_HUMAN PDZ and LIM domain protein 1 | 13 |                       | QSTSFLVLQEI LESEEK GDPNKP SGFR     | 211 | 27 | 5  | 16.88  | b6*b6y5y8y14                                     | 3035.51 | 87.037  | 16852  | 4 | 759.63  | -7.32  |
| O00151 PDLI1_HUMAN PDZ and LIM domain protein 1 | 14 | Carbamidomethyl+C(11) | GHFFVEDQIYCEKHAR                   | 296 | 16 | 3  | 16.24  | b10b13y11                                        | 2035.94 | 77.266  | 6401   | 3 | 679.32  | -3.90  |
| O00151 PDLI1_HUMAN PDZ and LIM domain protein 1 | 15 | Carbamidomethyl+C(13) | QKGHFFVEDQIYCEK                    | 294 | 15 | 3  | 17.17  | b12y10y14                                        | 1927.91 | 91.225  | 5119   | 2 | 964.46  | 4.75   |
| O00151 PDLI1_HUMAN PDZ and LIM domain protein 1 | 16 | Phosphoryl STY(11)    | VTPPEGYEVVTVFPK                    | 314 | 15 | 3  | 17.17  | b9b12_HPO3 b12y8                                 | 1741.85 | 56.239  | 7302   | 3 | 581.29  | 6.31   |
| O00151 PDLI1_HUMAN PDZ and LIM domain protein 1 | 17 | Phosphoryl STY(21)    | TAASGVEANSRPLDHAQPPSSLV I DK       | 166 | 26 | 10 | 49.52  | b3b6b10_HPO3 b10b19y6y9y10°y10y20y24             | 2740.32 | 136.377 | 1508   | 3 | 914.11  | 1.25   |
| O00151 PDLI1_HUMAN PDZ and LIM domain protein 1 | 18 | Oxidation+M(3)        | SAMPFTASPASSTTAR                   | 122 | 16 | 3  | 22.77  | b12b13y12                                        | 1598.73 | 56.984  | 1793   | 3 | 533.58  | -10.16 |
| Q13509 TBB3_HUMAN Tubulin beta-3 chain          | 1  |                       | LAVNMVPFPR                         | 252 | 10 | 14 | 109.18 | b2b3b5*b5y1y3y4y5y6y7y8y9*y9y10                  | 1143.63 | 71.952  | 238985 | 2 | 572.32  | -5.12  |
| Q13509 TBB3_HUMAN Tubulin beta-3 chain          | 2  |                       | IMNTFSVVPSPK                       | 162 | 12 | 6  | 47.64  | b3y5y7y8y9y12                                    | 1319.71 | 62.942  | 110098 | 2 | 660.36  | 2.50   |
| Q13509 TBB3_HUMAN Tubulin beta-3 chain          | 3  | Carbamidomethyl+C(10) | EIVHIQAGQC GNQIGAK                 | 2   | 17 | 7  | 42.77  | b2b4*b4y7y8y11y12                                | 1822.91 | 42.608  | 67345  | 3 | 608.31  | -6.56  |
| Q13509 TBB3_HUMAN Tubulin beta-3 chain          | 4  |                       | GHYTEGAELVDSVLDVVRK                | 103 | 19 | 5  | 22.39  | b4b7*b7b13y4                                     | 2087.07 | 86.255  | 39743  | 3 | 696.36  | -4.21  |
| Q13509 TBB3_HUMAN Tubulin beta-3 chain          | 5  |                       | ALTVPELTQQM FDAK                   | 282 | 15 | 6  | 28     | b6b11b13*b13y1y11                                | 1691.88 | 85.032  | 28221  | 2 | 846.44  | 5.41   |
| Q13509 TBB3_HUMAN Tubulin beta-3 chain          | 6  |                       | FWEVISDEHGIDPSGN YVGDSDLQ LER      | 19  | 27 | 13 | 40.42  | b5°b5b9b13y3°y3y4°y4y8y10°y10y24y27              | 3077.41 | 117.509 | 24144  | 3 | 1026.47 | -1.51  |
| Q13509 TBB3_HUMAN Tubulin beta-3 chain          | 7  |                       | ISEQFTAMFRR                        | 380 | 11 | 11 | 68.38  | b2b3b4°b4b5°b5b6b9y10y11*y11                     | 1385.71 | 57.850  | 7991   | 2 | 693.36  | 9.51   |
| Q13509 TBB3_HUMAN Tubulin beta-3 chain          | 8  |                       | MSSTFIGNSTAIQELFK                  | 362 | 17 | 5  | 15.44  | b9b13y2y11°y11                                   | 1873.93 | 99.479  | 2890   | 3 | 625.31  | -3.71  |

|                                                  |    |                      |                              |     |    |    |        |                                                |         |         |        |   |         |        |
|--------------------------------------------------|----|----------------------|------------------------------|-----|----|----|--------|------------------------------------------------|---------|---------|--------|---|---------|--------|
| Q13509 TBB3_HUMAN Tubulin beta-3 chain           | 9  |                      | SGAFGHLFRPDNFFIGSQSGAGNN WAK | 77  | 26 | 5  | 26.06  | b5y10y13y14y17                                 | 2795.30 | 69.613  | 10079  | 3 | 932.44  | -15.37 |
| Q13509 TBB3_HUMAN Tubulin beta-3 chain           | 10 |                      | VREEYPDR                     | 154 | 8  | 5  | 52.33  | b3b5°b5y3y6                                    | 1063.53 | 57.857  | 4579   | 2 | 532.27  | 11.02  |
| Q13509 TBB3_HUMAN Tubulin beta-3 chain           | 11 |                      | MSMKEVDEQMLAIQSK             | 320 | 16 | 3  | 16.24  | b6b12y12                                       | 1867.87 | 98.095  | 3527   | 4 | 467.72  | -12.81 |
| Q13509 TBB3_HUMAN Tubulin beta-3 chain           | 12 | Phosphoryl STY(10)   | MSSTFIGNSTAIQELFKR           | 362 | 18 | 4  | 22.15  | b7°b7b8_H3PO4 b8y9                             | 2109.99 | 107.285 | 12868  | 2 | 1055.50 | -1.27  |
| Q13509 TBB3_HUMAN Tubulin beta-3 chain           | 13 | Phosphoryl STY(9)    | MSSTFIGNSTAIQELFK            | 362 | 17 | 4  | 24.8   | b7y5y9y12                                      | 1953.91 | 110.535 | 2001   | 2 | 977.46  | 9.68   |
| P00924 ENO1_YEAST Enolase 1                      | 1  |                      | SIVPSGASTGVHEALEMR           | 32  | 18 | 17 | 104.39 | b1b7y1y2y4y5y6°y6y9y11° y11y13°y13y14y15y16y18 | 1840.91 | 59.941  | 114617 | 3 | 614.31  | -9.22  |
| P00924 ENO1_YEAST Enolase 1                      | 2  |                      | NVNDVIAPAFVK                 | 67  | 12 | 11 | 59.63  | b1b2b4b5°b5b6y1y5y6y10 y12                     | 1286.71 | 64.850  | 109953 | 2 | 643.86  | -0.38  |
| P00924 ENO1_YEAST Enolase 1                      | 3  |                      | IGSEVYHNLK                   | 185 | 10 | 4  | 35.72  | y3y4y5y10                                      | 1159.60 | 35.929  | 100665 | 3 | 387.20  | -12.84 |
| P00924 ENO1_YEAST Enolase 1                      | 4  |                      | VNQGTLSESIEK                 | 346 | 12 | 9  | 66.4   | b2b9°b9y3y5y8y9y10y12                          | 1288.71 | 53.107  | 77315  | 2 | 644.86  | -1.61  |
| P00924 ENO1_YEAST Enolase 1                      | 5  |                      | IEEELGDNAVFAGENFHHGDK        | 415 | 21 | 5  | 28.11  | b3b4b6y8y11                                    | 2328.04 | 56.299  | 43146  | 4 | 582.77  | -6.19  |
| P00924 ENO1_YEAST Enolase 1                      | 6  |                      | IATAIEK                      | 330 | 7  | 6  | 39.14  | y2°y2y3y5y6y7                                  | 745.44  | 26.314  | 19027  | 2 | 373.22  | -13.18 |
| P00924 ENO1_YEAST Enolase 1                      | 7  |                      | AAQDSFAAGWGVMSHR             | 358 | 17 | 3  | 15.44  | b3y11y14                                       | 1789.83 | 104.035 | 144687 | 2 | 895.42  | -10.30 |
| P00924 ENO1_YEAST Enolase 1                      | 8  |                      | AADALLK                      | 338 | 8  | 8  | 90.57  | b3°b3b5y3y4y5y6y7                              | 814.49  | 51.716  | 85389  | 2 | 407.75  | -16.19 |
| P00924 ENO1_YEAST Enolase 1                      | 9  |                      | YDLDFK                       | 258 | 6  | 3  | 25.94  | y4y5°y5                                        | 800.37  | 53.395  | 53151  | 2 | 400.69  | -12.74 |
| P00924 ENO1_YEAST Enolase 1                      | 10 |                      | LNQLLR                       | 409 | 6  | 5  | 38.69  | b3y4*y4y5*y5                                   | 756.46  | 40.628  | 32430  | 2 | 378.74  | -11.05 |
| P00924 ENO1_YEAST Enolase 1                      | 11 | Carbamidomethyl+C(5) | IGLDCASSEFFK                 | 243 | 12 | 6  | 30.61  | b3b7°b7y6°y6y11                                | 1373.66 | 90.388  | 18956  | 2 | 687.33  | 10.93  |
| P00924 ENO1_YEAST Enolase 1                      | 12 |                      | NVPLYK                       | 126 | 6  | 1  | 13.2   | b3                                             | 733.42  | 34.506  | 9266   | 2 | 367.21  | -9.40  |
| P00924 ENO1_YEAST Enolase 1                      | 13 |                      | AVDDFLISLDGTANK              | 88  | 15 | 3  | 17.17  | b3b13y7                                        | 1578.80 | 81.376  | 7843   | 2 | 789.90  | -0.23  |
| P00924 ENO1_YEAST Enolase 1                      | 14 |                      | GNPTVEVELTTEK                | 15  | 13 | 6  | 30.78  | b6°b6b11°b11b12y8                              | 1416.74 | 63.946  | 3119   | 3 | 472.92  | 11.55  |
| P00924 ENO1_YEAST Enolase 1                      | 15 |                      | SVYDSR                       | 9   | 6  | 1  | 13.2   | b4                                             | 726.34  | 33.269  | 2568   | 1 | 726.34  | -1.09  |
| P00924 ENO1_YEAST Enolase 1                      | 16 |                      | MAVSKVYAR                    | 0   | 9  | 4  | 29.25  | b5b7°b7y3                                      | 1024.56 | 55.962  | 198518 | 2 | 512.78  | -1.07  |
| P00924 ENO1_YEAST Enolase 1                      | 17 |                      | IEEELGDNAVFAGENFHHGDKL       | 415 | 22 | 5  | 29.07  | b15y10y12y15y17                                | 2441.12 | 62.597  | 52440  | 4 | 611.03  | -8.50  |
| P00924 ENO1_YEAST Enolase 1                      | 18 |                      | AAGHDGKVK                    | 234 | 9  | 3  | 37.03  | b5b6b7                                         | 882.47  | 29.470  | 8639   | 2 | 441.74  | -13.90 |
| P00924 ENO1_YEAST Enolase 1                      | 19 |                      | RYPIVSIEDPFAEDDWEAWSHFFK     | 288 | 24 | 3  | 18.46  | y4y8y11                                        | 2984.43 | 116.566 | 6214   | 4 | 746.86  | 13.99  |
| P00924 ENO1_YEAST Enolase 1                      | 20 |                      | YDLDFKNPNSDK                 | 258 | 12 | 5  | 21.17  | b3b5y4°y4*y4                                   | 1455.67 | 86.205  | 3876   | 2 | 728.34  | -1.01  |
| P00924 ENO1_YEAST Enolase 1                      | 21 | Phosphoryl STY(12)   | AVDDFLISLDGTANK              | 88  | 15 | 6  | 40.04  | b3b6°b6b11°b11b13_H3P O4 b13                   | 1658.75 | 65.054  | 3149   | 2 | 829.88  | -4.78  |
| P00924 ENO1_YEAST Enolase 1                      | 22 | Oxidation+M(13)      | AAQDSFAAGWGVMSHR             | 358 | 17 | 10 | 49.81  | b3b6b14y8°y8y9°y9y11y13 °y13                   | 1805.85 | 71.021  | 5419   | 3 | 602.62  | 5.00   |
| P00924 ENO1_YEAST Enolase 1                      | 23 |                      | VPSGASTGVHEALEMR             | 34  | 16 | 1  | 7.45   | b14                                            | 1640.80 | 59.998  | 3534   | 2 | 820.90  | -2.98  |
| P00924 ENO1_YEAST Enolase 1                      | 24 |                      | SEVYHNLK                     | 187 | 8  | 1  | 8      | b5                                             | 989.51  | 35.907  | 2861   | 2 | 495.26  | 2.47   |
| P14618 KPYM_HUMAN Pyruvate kinase isozymes M1/M2 | 1  | Carbamidomethyl+C(6) | NTGICTIGPASR                 | 43  | 13 | 11 | 106.85 | b2b3b4y4y5y6y7y8y9y11y13                       | 1359.71 | 52.871  | 66151  | 2 | 680.36  | 1.71   |
| P14618 KPYM_HUMAN Pyruvate kinase isozymes M1/M2 | 2  |                      | ITLDNAYMEK                   | 141 | 10 | 10 | 65.98  | b2°b2y1y2y3y6y7y8y9y10                         | 1197.58 | 51.932  | 65587  | 2 | 599.30  | 1.12   |
| P14618 KPYM_HUMAN Pyruvate kinase isozymes M1/M2 | 3  |                      | GDLGIEIPAEK                  | 294 | 11 | 8  | 50.41  | b3b4b5y2°y2y4y6y11                             | 1141.61 | 59.230  | 64817  | 2 | 571.31  | -0.64  |
| P14618 KPYM_HUMAN Pyruvate kinase isozymes M1/M2 | 4  |                      | EAEAAIYHLQLFEELRR            | 383 | 17 | 8  | 22.43  | b3°b3b17y1y10y11*y11y17                        | 2088.07 | 78.693  | 61986  | 3 | 696.70  | -6.08  |
| P14618 KPYM_HUMAN Pyruvate kinase isozymes M1/M2 | 5  |                      | GADFLVTEVENGGSLGSK           | 188 | 18 | 9  | 45.97  | b5b6y2y3y5y12y13°y13y18                        | 1779.88 | 73.027  | 59406  | 2 | 890.44  | 1.23   |
| P14618 KPYM_HUMAN Pyruvate kinase isozymes M1/M2 | 6  |                      | APIIAVTR                     | 447 | 8  | 6  | 34.82  | b2b3y1y4y7y8                                   | 840.52  | 44.128  | 48676  | 2 | 420.76  | -12.93 |
| P14618 KPYM_HUMAN Pyruvate kinase isozymes M1/M2 | 7  |                      | TATESFASDPILYRPVAVALDTK      | 92  | 23 | 5  | 12.44  | b5°b5y3y14y23                                  | 2465.30 | 81.732  | 44846  | 3 | 822.44  | 3.47   |
| P14618 KPYM_HUMAN Pyruvate kinase isozymes M1/M2 | 8  | Carbamidomethyl+C(7) | GIFPVLCKDPVQEAWAEDVDLR       | 467 | 22 | 8  | 73.33  | y2y5y6y7y8°y8y9y10                             | 2557.27 | 89.446  | 44684  | 3 | 853.10  | -0.67  |

|                                                   |    |                                       |                                            |     |    |    |       |                                     |         |         |        |   |         |        |
|---------------------------------------------------|----|---------------------------------------|--------------------------------------------|-----|----|----|-------|-------------------------------------|---------|---------|--------|---|---------|--------|
| [P14618]KPYM_HUMAN Pyruvate kinase isozymes M1/M2 | 9  | Carbamidomethyl+C(16)                 | AEGSDVANAVLDGADCIMLSGET AK                 | 342 | 25 | 8  | 17.85 | b1b14y1y2y5y8y15y25                 | 2494.16 | 89.096  | 32534  | 3 | 832.06  | 8.12   |
| [P14618]KPYM_HUMAN Pyruvate kinase isozymes M1/M2 | 10 |                                       | FGVEQDQVDMVFASFIRK                         | 230 | 17 | 7  | 61.66 | b2b3b4b6b9b13b16                    | 1987.98 | 104.026 | 20585  | 3 | 663.33  | -6.32  |
| [P14618]KPYM_HUMAN Pyruvate kinase isozymes M1/M2 | 11 |                                       | DPVQEAWAEDVDLR                             | 475 | 14 | 9  | 40.45 | b3b4*b4b6*b6b13*b13y11 y14          | 1642.76 | 61.901  | 15238  | 3 | 548.26  | -8.55  |
| [P14618]KPYM_HUMAN Pyruvate kinase isozymes M1/M2 | 12 |                                       | GSGTAEVELKK                                | 125 | 11 | 7  | 45.9  | b2*b2y3y5y6y7y11                    | 1118.60 | 25.035  | 11534  | 2 | 559.81  | -1.31  |
| [P14618]KPYM_HUMAN Pyruvate kinase isozymes M1/M2 | 13 |                                       | LAPITSDPTEATAVGAVEASFK                     | 400 | 22 | 3  | 12.79 | b12y10y12                           | 2175.13 | 79.974  | 59304  | 2 | 1088.07 | 4.27   |
| [P14618]KPYM_HUMAN Pyruvate kinase isozymes M1/M2 | 14 |                                       | GVNLPGAAVDLPAVSEK                          | 207 | 17 | 6  | 43.47 | b3b8y3y6y10y13                      | 1636.90 | 68.884  | 19022  | 2 | 818.95  | 7.38   |
| [P14618]KPYM_HUMAN Pyruvate kinase isozymes M1/M2 | 15 | Carbamidomethyl+C(1)                  | CDENILWLDYK                                | 151 | 11 | 3  | 34.92 | y3y4y5                              | 1468.68 | 46.045  | 12657  | 2 | 734.85  | 3.82   |
| [P14618]KPYM_HUMAN Pyruvate kinase isozymes M1/M2 | 16 |                                       | LNFSHGTHEYHAETIK                           | 73  | 16 | 4  | 22.87 | b9b12y10y12                         | 1883.89 | 75.415  | 8758   | 2 | 942.45  | -8.23  |
| [P14618]KPYM_HUMAN Pyruvate kinase isozymes M1/M2 | 17 | Carbamidomethyl+C(30)                 | SKPHSEAGTAFIQTQQLHAAMAD TFLHMCRCR          | 1   | 31 | 3  | 11.01 | b13b20y7                            | 3513.60 | 85.207  | 3165   | 3 | 1171.87 | -12.44 |
| [P14618]KPYM_HUMAN Pyruvate kinase isozymes M1/M2 | 18 |                                       | FGVEQDQVDMVFASFIR                          | 230 | 16 | 5  | 40.78 | b6y3y4y5y11                         | 1859.90 | 113.423 | 2774   | 3 | 620.64  | -0.46  |
| [P14618]KPYM_HUMAN Pyruvate kinase isozymes M1/M2 | 19 |                                       | IENHEGVR                                   | 270 | 8  | 6  | 34.82 | b4*b4y3y7*y7                        | 953.49  | 21.567  | 2276   | 2 | 477.25  | 9.54   |
| [P14618]KPYM_HUMAN Pyruvate kinase isozymes M1/M2 | 20 | Carbamidomethyl+C(7)                  | AGKPVICATQMLESMIK                          | 319 | 17 | 6  | 41.54 | b10b11b15y7y12y14                   | 1876.95 | 105.298 | 1696   | 2 | 938.98  | -10.28 |
| [P14618]KPYM_HUMAN Pyruvate kinase isozymes M1/M2 | 21 |                                       | TATESFASDPILYRPVAVALDTKG PEIR              | 92  | 28 | 5  | 19.2  | b5b7b14y19y21                       | 3017.57 | 80.624  | 187216 | 4 | 755.15  | -6.63  |
| [P14618]KPYM_HUMAN Pyruvate kinase isozymes M1/M2 | 22 | Carbamidomethyl+C(16)                 | AEGSDVANAVLDGADCIMLSGET AKGDYPLEAVR        | 342 | 34 | 14 | 90.98 | b4b5b6b9b12y3y4y6y12y14y15y16y25y28 | 3494.65 | 93.804  | 70920  | 3 | 1165.55 | 2.45   |
| [P14618]KPYM_HUMAN Pyruvate kinase isozymes M1/M2 | 23 |                                       | KGDVVIVLTGWRPGSGFTNTMR                     | 504 | 22 | 4  | 17.05 | b5b7b8y10                           | 2391.26 | 77.994  | 57701  | 3 | 797.76  | -1.74  |
| [P14618]KPYM_HUMAN Pyruvate kinase isozymes M1/M2 | 24 |                                       | KGVNLPGAADVLPVSEK                          | 206 | 18 | 5  | 29.21 | b7b9y3y6y12                         | 1764.98 | 62.945  | 47825  | 3 | 589.00  | -5.81  |
| [P14618]KPYM_HUMAN Pyruvate kinase isozymes M1/M2 | 25 |                                       | FDEILEASDGIMVARGDLGIEIPAE K                | 279 | 26 | 4  | 17.82 | b5*b5b14b17                         | 2788.43 | 82.156  | 23420  | 3 | 930.15  | 7.27   |
| [P14618]KPYM_HUMAN Pyruvate kinase isozymes M1/M2 | 26 |                                       | DIQDLKFGVEQDQVDMVFASFIR                    | 224 | 22 | 4  | 34.12 | b13*b13b14b15                       | 2572.24 | 80.578  | 10481  | 4 | 643.82  | -13.48 |
| [P14618]KPYM_HUMAN Pyruvate kinase isozymes M1/M2 | 27 |                                       | GADFLVTEVENGGSLGSKK                        | 188 | 19 | 3  | 23.33 | b8b9b15                             | 1907.99 | 56.593  | 10243  | 3 | 636.67  | 11.00  |
| [P14618]KPYM_HUMAN Pyruvate kinase isozymes M1/M2 | 28 |                                       | SGMNVARLNFSHGTHEYHAETIK                    | 66  | 23 | 4  | 12.44 | b7b9*b9y12                          | 2599.28 | 53.231  | 6984   | 3 | 867.10  | 13.71  |
| [P14618]KPYM_HUMAN Pyruvate kinase isozymes M1/M2 | 29 | Carbamidomethyl+C(7)                  | GIFPVLCKDPVQEAWAEDVDLR                     | 467 | 22 | 5  | 21.54 | b10y6*y6y7*y7                       | 2557.27 | 117.507 | 5899   | 3 | 853.09  | -2.67  |
| [P14618]KPYM_HUMAN Pyruvate kinase isozymes M1/M2 | 30 |                                       | IENHEGVRR                                  | 270 | 9  | 4  | 29.25 | b4*b4b5y8                           | 1109.59 | 31.178  | 5326   | 2 | 555.30  | 4.73   |
| [P14618]KPYM_HUMAN Pyruvate kinase isozymes M1/M2 | 31 | Carbamidomethyl+C(30)                 | SKPHSEAGTAFIQTQQLHAAMAD TFLHMCRLDIDSPPITAR | 1   | 42 | 6  | 52.31 | b8b9*b9b10*b10b11                   | 4692.23 | 105.806 | 4542   | 4 | 1173.81 | -9.78  |
| [P14618]KPYM_HUMAN Pyruvate kinase isozymes M1/M2 | 32 |                                       | RFDEILEASDGIMVAR                           | 278 | 16 | 3  | 16.24 | b8b13y11                            | 1821.89 | 85.748  | 4427   | 3 | 607.97  | -13.20 |
| [P14618]KPYM_HUMAN Pyruvate kinase isozymes M1/M2 | 33 | Carbamidomethyl+C(6)                  | MMIGRCNR                                   | 311 | 8  | 4  | 46.31 | b4b5y4y5                            | 1037.49 | 27.146  | 2476   | 2 | 519.25  | 10.00  |
| [P14618]KPYM_HUMAN Pyruvate kinase isozymes M1/M2 | 34 |                                       | NVRTATESFASDPILYRPVAVALDTK                 | 89  | 26 | 3  | 17.82 | b9b11b15                            | 2834.49 | 111.157 | 2327   | 3 | 945.50  | -5.08  |
| [P14618]KPYM_HUMAN Pyruvate kinase isozymes M1/M2 | 35 | Phosphoryl STY(7)                     | GADFLVTEVENGGSLGSK                         | 188 | 18 | 3  | 23.67 | b4b6b7_H3PO4 b7                     | 1859.83 | 44.963  | 2923   | 2 | 930.42  | -0.07  |
| [P14618]KPYM_HUMAN Pyruvate kinase isozymes M1/M2 | 36 | Carbamidomethyl+C(7); Oxidation+M(15) | AGKPVICATQMLESMIK                          | 319 | 17 | 8  | 34.32 | b11*b11y4*y4y5y8y12*y12             | 1892.96 | 120.657 | 2626   | 2 | 946.99  | -0.52  |

|                                                   |    |                                           |                                 |     |    |    |        |                                                 |         |         |        |   |         |        |
|---------------------------------------------------|----|-------------------------------------------|---------------------------------|-----|----|----|--------|-------------------------------------------------|---------|---------|--------|---|---------|--------|
| [P14618]KPYM_HUMAN Pyruvate kinase isozymes M1/M2 | 37 | Carbamidomethyl+C(31);Oxidation+M()       | MSKPHSEAGTAFIQTLQAAMA DTFLEHMCR | 0   | 32 | 5  | 25.29  | b5°b5b6b8b13                                    | 3660.72 | 119.688 | 1545   | 4 | 915.93  | 9.34   |
| [P02671]FIBA_HUMAN Fibrinogen alpha chain         | 1  |                                           | MELERPGGNEITR                   | 258 | 13 | 15 | 105.09 | b2b5b11y3y4°y4y6y7y8°y8*y8y11*y11y12y13         | 1501.74 | 40.913  | 190977 | 3 | 501.25  | -3.90  |
| [P02671]FIBA_HUMAN Fibrinogen alpha chain         | 2  |                                           | GLIDEVNDQFTNR                   | 71  | 13 | 18 | 113.28 | b3b5°b5b6°b6b13°b13y2y3y4°y4y7y8*y8y9y10y11y13  | 1520.74 | 68.733  | 136727 | 2 | 760.88  | 5.94   |
| [P02671]FIBA_HUMAN Fibrinogen alpha chain         | 3  |                                           | QLEQVIK                         | 202 | 8  | 5  | 47.56  | b3y2y3y4y6                                      | 928.54  | 37.543  | 119582 | 2 | 464.77  | -4.08  |
| [P02671]FIBA_HUMAN Fibrinogen alpha chain         | 4  |                                           | ALTDMPQMR                       | 249 | 9  | 7  | 52.78  | y1y4*y4y5y6y7y9                                 | 1062.51 | 50.146  | 111490 | 2 | 531.76  | -0.11  |
| [P02671]FIBA_HUMAN Fibrinogen alpha chain         | 5  |                                           | NSLFEYQK                        | 89  | 8  | 16 | 47.56  | b1*b1b2°b2b3b8y2*y2y4°y4*y4y5y6*y6y8*y8         | 1028.50 | 49.570  | 80317  | 2 | 514.75  | -2.49  |
| [P02671]FIBA_HUMAN Fibrinogen alpha chain         | 6  | Carbamidomethyl+C(11)                     | EVVTSSEGDSCPEAMDGLTSLGIG TLDGFR | 480 | 30 | 11 | 66.33  | b14y2y3y4y6y7y11y12y13y15y30                    | 3128.45 | 90.503  | 69224  | 3 | 1043.49 | 13.74  |
| [P02671]FIBA_HUMAN Fibrinogen alpha chain         | 7  |                                           | TFPGFFSPMLGEFVSETESR            | 527 | 20 | 15 | 104.14 | b2b10b15y1y4y5y6y7°y7y8y9y13y14y18y20           | 2265.07 | 108.402 | 54963  | 2 | 1133.04 | 6.57   |
| [P02671]FIBA_HUMAN Fibrinogen alpha chain         | 8  |                                           | ESSSHHPGIAEFPSR                 | 558 | 15 | 9  | 56.2   | b6°b6b15y3y4y5y8y9y15                           | 1637.76 | 37.881  | 42780  | 3 | 546.59  | -5.89  |
| [P02671]FIBA_HUMAN Fibrinogen alpha chain         | 9  |                                           | TVIGPDGHKEVTK                   | 467 | 13 | 10 | 72.29  | b2y2y3y4y5y7°y7y8y10y13                         | 1380.73 | 22.647  | 27983  | 3 | 460.92  | -10.43 |
| [P02671]FIBA_HUMAN Fibrinogen alpha chain         | 10 |                                           | GGSTSYGTGSETESPR                | 271 | 16 | 11 | 89.51  | b5y6°y6y7y8y9°y9y10y11y12y16                    | 1572.68 | 24.291  | 17987  | 2 | 786.85  | 3.80   |
| [P02671]FIBA_HUMAN Fibrinogen alpha chain         | 11 |                                           | EVDLKDYEDQQK                    | 190 | 12 | 17 | 92.11  | b2b4b6b8b10°b10b11°b11y2*y2y4°y4*y4y5y11*y11y12 | 1509.71 | 47.057  | 13772  | 2 | 755.36  | 0.24   |
| [P02671]FIBA_HUMAN Fibrinogen alpha chain         | 12 |                                           | NPSSAGSWNSGSSGPGSTGNR           | 287 | 21 | 4  | 20.53  | b7b9b15y9                                       | 1963.86 | 43.985  | 3678   | 3 | 655.29  | 7.02   |
| [P02671]FIBA_HUMAN Fibrinogen alpha chain         | 13 |                                           | MADEAGSEADHEGTHSTKR             | 602 | 19 | 7  | 45.75  | b3y2y3y7y8y14y15                                | 2028.86 | 14.884  | 2432   | 3 | 676.96  | -6.02  |
| [P02671]FIBA_HUMAN Fibrinogen alpha chain         | 14 |                                           | MKPVPLVPGNFK                    | 225 | 13 | 5  | 32.54  | b4y5y8°y8y11                                    | 1441.78 | 63.218  | 68693  | 3 | 481.26  | -7.96  |
| [P02671]FIBA_HUMAN Fibrinogen alpha chain         | 15 |                                           | DSHSLTTNIMEILR                  | 100 | 14 | 5  | 37.87  | b3b10b13y3y11                                   | 1629.83 | 86.888  | 42840  | 2 | 815.42  | 0.97   |
| [P02671]FIBA_HUMAN Fibrinogen alpha chain         | 16 |                                           | IEVLK                           | 137 | 5  | 2  | 25.49  | b3y3                                            | 601.39  | 34.538  | 5944   | 1 | 601.39  | -1.42  |
| [P02671]FIBA_HUMAN Fibrinogen alpha chain         | 17 |                                           | TWQDYK                          | 687 | 6  | 1  | 13.2   | y4                                              | 840.40  | 75.196  | 4674   | 1 | 840.40  | 9.22   |
| [P02671]FIBA_HUMAN Fibrinogen alpha chain         | 18 | Carbamidomethyl+C(3)                      | IVCLVLSVVGTAWTADSGEGDFL AEGGGVR | 5   | 30 | 3  | 11.09  | b16y6y13                                        | 3035.45 | 100.820 | 3990   | 3 | 1012.49 | -22.04 |
| [P02671]FIBA_HUMAN Fibrinogen alpha chain         | 19 |                                           | GSESGIFTNTK                     | 547 | 11 | 4  | 35.11  | b4b8b9y4                                        | 1140.53 | 82.587  | 1661   | 1 | 1140.53 | -16.70 |
| [P02671]FIBA_HUMAN Fibrinogen alpha chain         | 20 |                                           | MELERPGGNEITRGGSTSYGTGSE TESPR  | 258 | 29 | 6  | 22.95  | b7y4y6y9°y9y11                                  | 3055.40 | 117.505 | 68791  | 4 | 764.61  | -0.64  |
| [P02671]FIBA_HUMAN Fibrinogen alpha chain         | 21 |                                           | QFTSSTSYNRGDSTFESK              | 581 | 18 | 4  | 20.44  | b6b11y4y13                                      | 2041.90 | 38.390  | 53928  | 3 | 681.31  | -4.18  |
| [P02671]FIBA_HUMAN Fibrinogen alpha chain         | 22 |                                           | DSHSLTTNIMEILRGDFSSANNR         | 100 | 23 | 3  | 12.44  | b10y5y7                                         | 2578.26 | 116.480 | 12894  | 3 | 860.09  | 10.42  |
| [P02671]FIBA_HUMAN Fibrinogen alpha chain         | 23 |                                           | GSESGIFTNTKESSSHHPGIAEFPS R     | 547 | 26 | 3  | 17.82  | b7b12b25                                        | 2759.30 | 111.414 | 8044   | 3 | 920.44  | -0.80  |
| [P02671]FIBA_HUMAN Fibrinogen alpha chain         | 24 |                                           | HRHPDEAAFFDTASTGK               | 510 | 17 | 4  | 15.44  | b9y8y10°y10                                     | 1886.86 | 34.026  | 3744   | 2 | 943.93  | -12.03 |
| [P02671]FIBA_HUMAN Fibrinogen alpha chain         | 25 | Carbamidomethyl+C(1);Carbamidomethyl+C(5) | CPSGCRMK                        | 63  | 8  | 4  | 49.32  | b3b7y4y5                                        | 995.44  | 27.165  | 2902   | 2 | 498.22  | 13.55  |

|                                                                              |    |                                         |                                    |     |    |    |        |                                 |         |         |        |   |         |        |
|------------------------------------------------------------------------------|----|-----------------------------------------|------------------------------------|-----|----|----|--------|---------------------------------|---------|---------|--------|---|---------|--------|
| [P02671 FIBA_HUMAN Fibrinogen alpha chain                                    | 26 | Carbamidomethyl+C(9)                    | VVERHQSACK                         | 38  | 10 | 6  | 41.47  | b3°b3y3y4y5°y5                  | 1213.59 | 27.123  | 2594   | 3 | 405.20  | -13.38 |
| [P02671 FIBA_HUMAN Fibrinogen alpha chain                                    | 27 |                                         | EVDLKDYEDQQK                       | 190 | 12 | 5  | 43.34  | y5*y5y6y7y10                    | 1509.73 | 28.762  | 2354   | 2 | 755.37  | 12.86  |
| [P02671 FIBA_HUMAN Fibrinogen alpha chain                                    | 28 |                                         | EKVTSGSTTTTR                       | 446 | 12 | 4  | 38.69  | b9y8y9y10                       | 1267.66 | 63.968  | 2029   | 3 | 423.23  | 12.52  |
| [P02671 FIBA_HUMAN Fibrinogen alpha chain                                    | 29 |                                         | MKGLIDEVNQDFTNR                    | 69  | 15 | 3  | 23.19  | b11b12y7                        | 1779.89 | 82.656  | 1777   | 4 | 445.73  | 9.81   |
| [P02671 FIBA_HUMAN Fibrinogen alpha chain                                    | 30 |                                         | ALTDMPQMRMELERPGGNEITR             | 249 | 22 | 4  | 19.74  | b6b9b14y12                      | 2545.21 | 90.365  | 1736   | 3 | 849.07  | -9.88  |
| [P02671 FIBA_HUMAN Fibrinogen alpha chain                                    | 31 |                                         | DNTYNRVSEDLR                       | 123 | 12 | 4  | 21.17  | b7b9y5°y5                       | 1481.71 | 37.201  | 1559   | 2 | 741.36  | 5.11   |
| [P02671 FIBA_HUMAN Fibrinogen alpha chain                                    | 32 | Phosphoryl STY()                        | QFTSSTSYNR                         | 581 | 10 | 4  | 32.71  | b4b5*b5b8                       | 1270.52 | 39.634  | 14570  | 3 | 424.18  | 14.89  |
| [P02671 FIBA_HUMAN Fibrinogen alpha chain                                    | 33 | Carbamidomethyl+C(3); Phosphoryl STY(7) | IVCLVLSVVGTAWTADS GEGDFL AEGGGVR   | 5   | 30 | 5  | 15.77  | b8°b8y10y15_H3PO4 y15y23        | 3115.49 | 100.113 | 12633  | 4 | 779.63  | 5.33   |
| [P02671 FIBA_HUMAN Fibrinogen alpha chain                                    | 34 | Phosphoryl STY(5)                       | GGSTSYGTGSETESPR                   | 271 | 16 | 7  | 62.56  | b5y6y7_HPO3 y7°y7y8y9y10        | 1652.61 | 25.335  | 2867   | 3 | 551.54  | -13.15 |
| [P02671 FIBA_HUMAN Fibrinogen alpha chain                                    | 35 | Phosphoryl STY(5)                       | NNKDSHSLTTNIMEILR                  | 97  | 17 | 4  | 22.43  | b4*b4b5y3                       | 2065.99 | 58.622  | 1727   | 2 | 1033.50 | 11.70  |
| [P02671 FIBA_HUMAN Fibrinogen alpha chain                                    | 36 | Oxidation+M()                           | ALTDMPQMR                          | 249 | 9  | 5  | 29.25  | b4°b4b7°b7y8                    | 1078.50 | 45.972  | 56608  | 2 | 539.75  | -1.81  |
| [P02671 FIBA_HUMAN Fibrinogen alpha chain                                    | 37 | Oxidation+M(13)                         | NNKDSHSLTTNIMEILR                  | 97  | 17 | 4  | 22.84  | b3b8°b8b14                      | 2001.99 | 100.099 | 28007  | 2 | 1001.50 | -5.06  |
| [P02671 FIBA_HUMAN Fibrinogen alpha chain                                    | 38 | Oxidation+M(9)                          | TFPGFFSPMLGEFVSETESR               | 527 | 20 | 3  | 23.05  | y3y4y6                          | 2281.07 | 104.395 | 22040  | 2 | 1141.04 | 7.49   |
| [P02671 FIBA_HUMAN Fibrinogen alpha chain                                    | 39 | Carbamidomethyl+C(11); Oxidation+M(15)  | EVVTSSEGDGSDCPEAMDLGTL SGIG TLDGFR | 480 | 30 | 4  | 15.77  | b3y5y7y10                       | 3144.38 | 96.984  | 5466   | 3 | 1048.80 | -4.89  |
| [P02671 FIBA_HUMAN Fibrinogen alpha chain                                    | 40 | Oxidation+M(1)                          | MELERPGGNEITR                      | 258 | 13 | 7  | 56.85  | b5b6b9b12*b12y6y7               | 1517.72 | 42.860  | 4926   | 3 | 506.58  | -9.57  |
| [P02671 FIBA_HUMAN Fibrinogen alpha chain                                    | 41 |                                         | IGPDGHKEVTK                        | 469 | 11 | 1  | 7.31   | b9                              | 1180.63 | 22.635  | 13866  | 2 | 590.82  | -4.24  |
| [P02671 FIBA_HUMAN Fibrinogen alpha chain                                    | 42 |                                         | GPDGHKEVTK                         | 470 | 10 | 0  | 3.6    |                                 | 1067.55 | 22.624  | 7834   | 2 | 534.28  | -2.17  |
| [P02671 FIBA_HUMAN Fibrinogen alpha chain                                    | 43 |                                         | LERPGGNEITR                        | 260 | 11 | 2  | 15.87  | b3b8                            | 1241.65 | 40.924  | 6732   | 2 | 621.33  | -5.80  |
| [P02671 FIBA_HUMAN Fibrinogen alpha chain                                    | 44 |                                         | NSLFEYQK                           | 89  | 8  | 0  | 1.35   |                                 | 1011.49 | 49.547  | 2297   | 2 | 506.25  | 11.04  |
| [Q3ZCM7 TBB8_HUMAN Tubulin beta-8 chain                                      | 1  |                                         | LAVNMVPFPR                         | 252 | 10 | 14 | 109.18 | b2b3b5°b5y1y3y4y5y6y7y8y9*y9y10 | 1143.63 | 71.952  | 238985 | 2 | 572.32  | -5.12  |
| [Q3ZCM7 TBB8_HUMAN Tubulin beta-8 chain                                      | 2  |                                         | AVLVDLEPGTMDSVR                    | 62  | 15 | 8  | 35.18  | b2b3b11y2y8y9y11y15             | 1601.81 | 70.193  | 49736  | 2 | 801.41  | -3.81  |
| [Q3ZCM7 TBB8_HUMAN Tubulin beta-8 chain                                      | 3  |                                         | IREEYPDR                           | 154 | 8  | 10 | 65.08  | b2b4b5°b5b7y1y2°y2y3y5          | 1077.53 | 23.392  | 42843  | 2 | 539.27  | -0.34  |
| [Q3ZCM7 TBB8_HUMAN Tubulin beta-8 chain                                      | 4  |                                         | MSATFIGNNTAIQELFK                  | 362 | 17 | 5  | 32.37  | b7b9°b9b12b13                   | 1884.97 | 96.380  | 2606   | 2 | 942.99  | 8.10   |
| [Q3ZCM7 TBB8_HUMAN Tubulin beta-8 chain                                      | 5  |                                         | LHFFMPGFAPLTSR                     | 262 | 14 | 3  | 18.27  | b12y3y12                        | 1620.83 | 112.804 | 1500   | 2 | 810.92  | -2.64  |
| [Q3ZCM7 TBB8_HUMAN Tubulin beta-8 chain                                      | 6  | Carbamidomethyl+C(23); Phosphoryl STY() | LPTPTYGDLNHLVSATMSGVTTCLR          | 216 | 25 | 4  | 24.86  | b4b5y4y10                       | 2784.33 | 111.471 | 12575  | 4 | 696.84  | 12.01  |
| [Q3ZCM7 TBB8_HUMAN Tubulin beta-8 chain                                      | 7  | Oxidation+M(8)                          | VSEQFTAMFRR                        | 380 | 11 | 5  | 39.88  | b5b7b10*b10y7                   | 1387.69 | 76.928  | 2606   | 3 | 463.24  | 11.61  |
| [A6NKZ8 YI016_HUMAN Putative tubulin beta chain-like protein ENSP00000290377 | 1  |                                         | LAVNMVPFPR                         | 180 | 10 | 14 | 109.18 | b2b3b5°b5y1y3y4y5y6y7y8y9*y9y10 | 1143.63 | 71.952  | 238985 | 2 | 572.32  | -5.12  |

|                                                                             |    |                                        |                                   |     |    |    |       |                                             |         |         |        |   |         |        |
|-----------------------------------------------------------------------------|----|----------------------------------------|-----------------------------------|-----|----|----|-------|---------------------------------------------|---------|---------|--------|---|---------|--------|
| A6NKZ8 YI016_HUMAN Putative tubulin beta chain-like protein ENSP00000290377 | 2  |                                        | IREEYPDR                          | 82  | 8  | 10 | 65.08 | b2b4b5°b5b7y1y2°y2y3y5                      | 1077.53 | 23.392  | 42843  | 2 | 539.27  | -0.34  |
| A6NKZ8 YI016_HUMAN Putative tubulin beta chain-like protein ENSP00000290377 | 3  | Carbamidomethyl+C(18)                  | SGPFGQVLRPDNFIFGQCGAGNN WAK       | 5   | 26 | 3  | 11.67 | b4y5y7                                      | 2837.36 | 95.173  | 4623   | 3 | 946.46  | 0.69   |
| A6NKZ8 YI016_HUMAN Putative tubulin beta chain-like protein ENSP00000290377 | 4  |                                        | LHFFMPGFAPLTSR                    | 190 | 14 | 3  | 18.27 | b12y3y12                                    | 1620.83 | 112.804 | 1500   | 2 | 810.92  | -2.64  |
| A6NKZ8 YI016_HUMAN Putative tubulin beta chain-like protein ENSP00000290377 | 5  | Carbamidomethyl+C(18) ;Oxidation+M(26) | MSASFIGNNAAIQELFTCVSEQFT AMFR     | 290 | 28 | 6  | 29.41 | b5b12b15y4y5°y5                             | 3186.46 | 83.582  | 38218  | 3 | 1062.82 | -4.44  |
| A6NKZ8 YI016_HUMAN Putative tubulin beta chain-like protein ENSP00000290377 | 6  | Oxidation+M()                          | YTEGAELTESVMDVVRK                 | 33  | 17 | 4  | 24.8  | b5b13b15y13                                 | 1942.94 | 78.554  | 35373  | 3 | 648.32  | -2.51  |
| Q6PEY2 TBA3E_HUMAN Tubulin alpha-3E chain                                   | 1  |                                        | VGINYQPPTVVPGGDLAK                | 352 | 18 | 16 | 67.07 | b4*b4b5*b5b6*b6b7*b7b1 1°b11y1y2y8y12y14y18 | 1825.00 | 64.922  | 216139 | 2 | 913.00  | 5.55   |
| Q6PEY2 TBA3E_HUMAN Tubulin alpha-3E chain                                   | 2  |                                        | NLDIERPTYTNLNR                    | 215 | 14 | 16 | 60.05 | b2*b2b3°b3b5°b5b7y2y4*y 4y7y8y12*y12y14*y14 | 1718.86 | 51.755  | 209644 | 3 | 573.63  | -11.43 |
| Q6PEY2 TBA3E_HUMAN Tubulin alpha-3E chain                                   | 3  | Carbamidomethyl+C(3)                   | AVCMLSNTTAAIEAWAR                 | 373 | 17 | 7  | 37.33 | b8y4y8y11°y11*y11y16                        | 1864.91 | 83.137  | 85045  | 2 | 932.96  | 3.34   |
| Q6PEY2 TBA3E_HUMAN Tubulin alpha-3E chain                                   | 4  |                                        | DVNAAIATIK                        | 326 | 10 | 6  | 37.67 | b3b8y1y6y8y10                               | 1015.57 | 51.251  | 84912  | 2 | 508.29  | -4.69  |
| Q6PEY2 TBA3E_HUMAN Tubulin alpha-3E chain                                   | 5  | Carbamidomethyl+C(15)                  | AYHEQLSVAEITNACFEPANQMV K         | 280 | 24 | 7  | 32.35 | b10b11b14y1y7y11y13                         | 2750.30 | 72.595  | 73730  | 3 | 917.44  | 4.79   |
| Q6PEY2 TBA3E_HUMAN Tubulin alpha-3E chain                                   | 6  |                                        | FDGALNVDLTFEQTNLVPYPR             | 243 | 21 | 11 | 54.9  | b2b3b4b16b17b21y2y4y5y 11y21                | 2409.22 | 93.917  | 46804  | 2 | 1205.11 | 3.75   |
| Q6PEY2 TBA3E_HUMAN Tubulin alpha-3E chain                                   | 7  |                                        | TIGGGDDSFNTFFSETGAGK              | 40  | 20 | 4  | 13.63 | b12b14°b14y14                               | 2007.92 | 76.324  | 61347  | 2 | 1004.46 | 12.28  |
| Q6PEY2 TBA3E_HUMAN Tubulin alpha-3E chain                                   | 8  | Carbamidomethyl+C(5)                   | LADLCTGLQGFLIFHSFGGGTGSF FASLLMER | 124 | 32 | 9  | 47.39 | b3y3y4y6y12°y12y13y14°y 14                  | 3359.62 | 119.555 | 46958  | 4 | 840.66  | -10.03 |
| Q6PEY2 TBA3E_HUMAN Tubulin alpha-3E chain                                   | 9  | Carbamidomethyl+C(8)                   | TIQFVDWCPTGFK                     | 339 | 13 | 5  | 44.11 | b3b4y5y9y10                                 | 1598.78 | 82.462  | 43537  | 2 | 799.89  | 4.96   |
| Q6PEY2 TBA3E_HUMAN Tubulin alpha-3E chain                                   | 10 |                                        | EDAASNYAR                         | 96  | 9  | 6  | 57.75 | b3b6°b6b7y6y8                               | 996.45  | 24.311  | 37817  | 2 | 498.73  | 13.97  |
| Q6PEY2 TBA3E_HUMAN Tubulin alpha-3E chain                                   | 11 |                                        | FDLMYAK                           | 394 | 7  | 6  | 48.87 | b3°b3b4b6°b6y6                              | 887.43  | 27.123  | 5583   | 2 | 444.22  | -4.68  |
| Q6PEY2 TBA3E_HUMAN Tubulin alpha-3E chain                                   | 12 | Oxidation+M(12)                        | WAFVHWYVYGEGMEEGEFSEAR            | 401 | 21 | 3  | 21.63 | b3y5y6                                      | 2532.10 | 95.342  | 9787   | 3 | 844.70  | 1.06   |
| Q01518 CAP1_HUMAN Adenylyl cyclase-associated protein 1                     | 1  |                                        | AGAAPYVQAFDSLLAGPVAEYLK           | 37  | 23 | 15 | 120.2 | b3b4b5b6b7b15y2y3y4°y4 y5y7y8y9y23          | 2351.21 | 114.498 | 71719  | 3 | 784.41  | -5.81  |
| Q01518 CAP1_HUMAN Adenylyl cyclase-associated protein 1                     | 2  | Carbamidomethyl+C(5)                   | NSLDCEIVSAK                       | 422 | 11 | 7  | 30.14 | b1b2y1y3y8y9y11                             | 1235.60 | 45.767  | 62733  | 2 | 618.30  | 3.16   |
| Q01518 CAP1_HUMAN Adenylyl cyclase-associated protein 1                     | 3  |                                        | LSDLLAPISEQIK                     | 100 | 13 | 6  | 32.91 | b1b3b4y5°y5y7                               | 1426.82 | 76.848  | 45260  | 2 | 713.91  | 5.05   |
| Q01518 CAP1_HUMAN Adenylyl cyclase-associated protein 1                     | 4  | Carbamidomethyl+C(9)                   | ALLVTASQCQPAENK                   | 84  | 16 | 11 | 70.84 | b3b11y3y5y6°y6y9y11*y1 1y12y16              | 1757.89 | 42.704  | 39187  | 2 | 879.45  | 0.35   |
| Q01518 CAP1_HUMAN Adenylyl cyclase-associated protein 1                     | 5  |                                        | LEAVSHTSDMHR                      | 17  | 12 | 10 | 72.83 | b2b3b5y1y3y5y6y7y8°y8                       | 1382.64 | 23.426  | 31525  | 3 | 461.55  | -7.68  |
| Q01518 CAP1_HUMAN Adenylyl cyclase-associated protein 1                     | 6  |                                        | VENQENVSNLVIEDTELK                | 330 | 18 | 9  | 76.46 | b3y4y5y6y7y8y11y15y18                       | 2073.05 | 69.366  | 30620  | 2 | 1037.03 | 7.18   |
| Q01518 CAP1_HUMAN Adenylyl cyclase-associated protein 1                     | 7  |                                        | EMNDAAMFYTNR                      | 155 | 12 | 5  | 48.11 | y4y5y6y7y12                                 | 1462.62 | 56.638  | 26114  | 2 | 731.81  | 8.43   |
| Q01518 CAP1_HUMAN Adenylyl cyclase-associated protein 1                     | 8  |                                        | SGPKPFSAPKQTPSPK                  | 294 | 18 | 17 | 63.39 | b1b2°b2b5b7°b7b8°b8y2y4 °y4y6y7°y7y8y10y18  | 1837.97 | 33.221  | 14393  | 3 | 613.33  | -7.24  |

|                                                         |    |                                                                        |                                            |     |    |    |        |                                                            |         |         |        |   |         |        |
|---------------------------------------------------------|----|------------------------------------------------------------------------|--------------------------------------------|-----|----|----|--------|------------------------------------------------------------|---------|---------|--------|---|---------|--------|
| Q01518 CAP1_HUMAN Adenylyl cyclase-associated protein 1 | 9  |                                                                        | SSEMNVLIPTTEGGDFNEFPVPEQFK                 | 433 | 25 | 5  | 17.85  | b7b9°b9b14y14                                              | 2811.35 | 61.900  | 27294  | 3 | 937.79  | 12.85  |
| Q01518 CAP1_HUMAN Adenylyl cyclase-associated protein 1 | 10 |                                                                        | AVGR                                       | 13  | 4  | 1  | 12.3   | b3                                                         | 402.25  | 91.609  | 21774  | 1 | 402.25  | -1.82  |
| Q01518 CAP1_HUMAN Adenylyl cyclase-associated protein 1 | 11 |                                                                        | HAEMVHTGLK                                 | 71  | 10 | 4  | 37.67  | b4b6y5y8                                                   | 1122.56 | 27.144  | 5697   | 3 | 374.86  | -12.72 |
| Q01518 CAP1_HUMAN Adenylyl cyclase-associated protein 1 | 12 |                                                                        | GYADSPSK                                   | 29  | 8  | 3  | 34.82  | b4y4y6                                                     | 824.38  | 98.831  | 5221   | 1 | 824.38  | 0.89   |
| Q01518 CAP1_HUMAN Adenylyl cyclase-associated protein 1 | 13 |                                                                        | VQVMGK                                     | 398 | 6  | 1  | 13.2   | b5                                                         | 661.38  | 27.201  | 2655   | 2 | 331.19  | 11.07  |
| Q01518 CAP1_HUMAN Adenylyl cyclase-associated protein 1 | 14 | Carbamidomethyl+C(9)                                                   | ALLVTASQCQQAENKLSDLLAPISEIQIK              | 84  | 29 | 9  | 46.63  | b3b4b11b14y5y7y8y21y25                                     | 3165.69 | 88.735  | 67498  | 3 | 1055.90 | 1.23   |
| Q01518 CAP1_HUMAN Adenylyl cyclase-associated protein 1 | 15 |                                                                        | SSLFAQINQGESITHALKHVSDDMK                  | 254 | 25 | 4  | 11.89  | b10b13°b13y14                                              | 2756.36 | 117.550 | 26051  | 3 | 919.46  | -2.66  |
| Q01518 CAP1_HUMAN Adenylyl cyclase-associated protein 1 | 16 |                                                                        | LEAVSHTSDMHRGYADSPSK                       | 17  | 20 | 4  | 18.55  | b3b10y8y10                                                 | 2187.99 | 28.723  | 18694  | 4 | 547.75  | -10.60 |
| Q01518 CAP1_HUMAN Adenylyl cyclase-associated protein 1 | 17 |                                                                        | ADMQNLVERLER                               | 1   | 12 | 3  | 28.38  | b3b6b7                                                     | 1473.75 | 21.538  | 7898   | 3 | 491.92  | -1.33  |
| Q01518 CAP1_HUMAN Adenylyl cyclase-associated protein 1 | 18 |                                                                        | LGLVFDDVVGIVEIINSKDVK                      | 377 | 21 | 3  | 33.97  | b3b4b5                                                     | 2272.28 | 115.446 | 5363   | 3 | 758.10  | -1.29  |
| Q01518 CAP1_HUMAN Adenylyl cyclase-associated protein 1 | 19 | Carbamidomethyl+C(12)                                                  | VPTISINKTDGCHAYLSK                         | 404 | 18 | 4  | 14.75  | b12y12°y12y17                                              | 2004.05 | 48.069  | 2834   | 2 | 1002.53 | 14.86  |
| Q01518 CAP1_HUMAN Adenylyl cyclase-associated protein 1 | 20 |                                                                        | GYADSPSKAGAAPYVQAFDSELLA<br>GPVAEYLK       | 29  | 31 | 4  | 35.64  | b8b11b12b13                                                | 3156.55 | 109.671 | 1900   | 3 | 1052.85 | -12.99 |
| Q01518 CAP1_HUMAN Adenylyl cyclase-associated protein 1 | 21 | Carbamidomethyl+C(21);<br>Carbamidomethyl+C(32);<br>Phosphoryl STY(13) | ELSGLPSGSPSAGSGPPPPPPPPPP<br>VSTISCSYESASR | 215 | 39 | 4  | 23.86  | b12b13y4y13                                                | 3950.79 | 85.120  | 2324   | 3 | 1317.60 | 0.06   |
| Q01518 CAP1_HUMAN Adenylyl cyclase-associated protein 1 | 22 |                                                                        | QENVSNLVIETELK                             | 333 | 15 | 0  | 5.85   |                                                            | 1730.88 | 69.290  | 21703  | 2 | 865.94  | 0.63   |
| Q01518 CAP1_HUMAN Adenylyl cyclase-associated protein 1 | 23 |                                                                        | AVSHTSDMHR                                 | 19  | 10 | 4  | 20.86  | b4°b4b5°b5                                                 | 1140.53 | 23.435  | 4109   | 3 | 380.85  | 3.96   |
| Q01518 CAP1_HUMAN Adenylyl cyclase-associated protein 1 | 24 |                                                                        | SDLLAPISEIQIK                              | 101 | 12 | 0  | 3.6    |                                                            | 1313.72 | 76.805  | 3776   | 2 | 657.37  | -5.67  |
| Q01518 CAP1_HUMAN Adenylyl cyclase-associated protein 1 | 25 |                                                                        | SGPKPFSAPKQTSPPSK                          | 294 | 18 | 0  | 5.85   |                                                            | 1819.94 | 33.198  | 2391   | 4 | 455.74  | -13.35 |
| P67936 TPM4_HUMAN Tropomyosin alpha-4 chain             | 1  |                                                                        | IQLVEEELDR                                 | 55  | 10 | 17 | 110.94 | b2°b2b3b4y2y3y4°y4y5°y5<br>y6y7y8y9°y9*y9y10               | 1243.65 | 58.328  | 293189 | 2 | 622.33  | 0.59   |
| P67936 TPM4_HUMAN Tropomyosin alpha-4 chain             | 2  |                                                                        | IQALQQADEAEDR                              | 13  | 14 | 19 | 106.21 | b2°b2b3y1y2°y2y3y4y5°y5<br>y8y9*y9y10°y10*y10y11y1<br>2y14 | 1614.78 | 38.540  | 103175 | 2 | 807.89  | 4.54   |
| P67936 TPM4_HUMAN Tropomyosin alpha-4 chain             | 3  | Carbamidomethyl+C(19)                                                  | EENVGLHQTLDTLNLNCI                         | 228 | 20 | 9  | 13.63  | b2°b2b12y1y2y3y13°y13y2<br>0                               | 2340.13 | 88.395  | 97658  | 2 | 1170.57 | 7.20   |
| P67936 TPM4_HUMAN Tropomyosin alpha-4 chain             | 4  |                                                                        | LATALQK                                    | 69  | 7  | 6  | 48.87  | b4y3y5y6°y6y7                                              | 744.46  | 27.312  | 23328  | 2 | 372.73  | -7.79  |
| P67936 TPM4_HUMAN Tropomyosin alpha-4 chain             | 5  |                                                                        | MEIQEMQLK                                  | 104 | 9  | 3  | 37.03  | y4y7y8                                                     | 1149.57 | 55.945  | 90918  | 2 | 575.29  | 6.58   |
| P67936 TPM4_HUMAN Tropomyosin alpha-4 chain             | 6  |                                                                        | AEGDVAALNR                                 | 44  | 10 | 4  | 25.72  | b6°b6y6y8                                                  | 1015.51 | 32.025  | 40718  | 2 | 508.26  | -3.55  |
| P67936 TPM4_HUMAN Tropomyosin alpha-4 chain             | 7  |                                                                        | AGLNSLEAVK                                 | 1   | 10 | 5  | 40.49  | b5b7°b7*b7b9                                               | 1001.58 | 67.289  | 3675   | 2 | 501.29  | 18.22  |
| P67936 TPM4_HUMAN Tropomyosin alpha-4 chain             | 8  |                                                                        | NVTNNLKSLEAASEK                            | 162 | 15 | 6  | 24.36  | b3°b3*b3b8y3y12                                            | 1617.85 | 88.913  | 165197 | 2 | 809.43  | 4.68   |
| P67936 TPM4_HUMAN Tropomyosin alpha-4 chain             | 9  |                                                                        | AEGDVAALNRR                                | 44  | 11 | 4  | 23.16  | b5y7y9*y9                                                  | 1171.62 | 28.700  | 87523  | 2 | 586.31  | 1.46   |
| P67936 TPM4_HUMAN Tropomyosin alpha-4 chain             | 10 |                                                                        | KIQALQQADEAEDR                             | 12  | 15 | 5  | 49.65  | b3b4b5y6y7                                                 | 1742.86 | 35.697  | 38524  | 3 | 581.62  | -5.18  |



|                                                   |    |                       |                                               |     |    |    |        |                                                        |         |         |        |   |         |        |
|---------------------------------------------------|----|-----------------------|-----------------------------------------------|-----|----|----|--------|--------------------------------------------------------|---------|---------|--------|---|---------|--------|
| P67936 TPM4_HUMAN Tropomyosin alpha-4 chain       | 11 |                       | IQALQQADEAEDRAQGLQR                           | 13  | 20 | 4  | 33.84  | b10b11*b11b12                                          | 2268.15 | 46.051  | 6565   | 3 | 756.72  | 9.58   |
| P67936 TPM4_HUMAN Tropomyosin alpha-4 chain       | 12 |                       | MAGLNSLEAVKR                                  | 0   | 12 | 3  | 28.38  | b4b5b8                                                 | 1288.70 | 31.077  | 4390   | 2 | 644.85  | -3.22  |
| P67936 TPM4_HUMAN Tropomyosin alpha-4 chain       | 13 |                       | EENVGLHQT                                     | 228 | 9  | 0  | 6.75   |                                                        | 1026.48 | 88.376  | 1604   | 1 | 1026.48 | -0.36  |
| P00488 F13A_HUMAN Coagulation factor XIII A chain | 1  |                       | LIASMSSDSLRL                                  | 705 | 11 | 15 | 107.41 | b2b3b9y1y3y4y5y6*y6y7*y7y8y9*y9y11                     | 1179.61 | 49.339  | 166889 | 2 | 590.31  | 2.48   |
| P00488 F13A_HUMAN Coagulation factor XIII A chain | 2  | Carbamidomethyl+C(14) | EIRPNSTVQWEEVCRPWVSGHRK                       | 682 | 23 | 6  | 26.69  | b3*b3b10y7y11y12                                       | 2850.40 | 56.104  | 146779 | 4 | 713.36  | -5.91  |
| P00488 F13A_HUMAN Coagulation factor XIII A chain | 3  |                       | AVPPNNSNAEEDDLPTVELQGVVPR                     | 13  | 25 | 9  | 40.26  | b3b6b13b14*b14y3y5y6y25                                | 2602.31 | 74.359  | 125986 | 3 | 868.11  | -1.13  |
| P00488 F13A_HUMAN Coagulation factor XIII A chain | 4  |                       | GTYPVPIVSELQSGK                               | 114 | 16 | 10 | 68.13  | b3*b3b4b13y3y6y7y8y12y16                               | 1687.93 | 83.413  | 101334 | 2 | 844.47  | 3.62   |
| P00488 F13A_HUMAN Coagulation factor XIII A chain | 5  |                       | STVLTIPETIIK                                  | 624 | 12 | 10 | 63.39  | b2*b2b3*b3y4y6y7y8y9y12                                | 1326.82 | 88.105  | 87189  | 2 | 663.91  | -1.75  |
| P00488 F13A_HUMAN Coagulation factor XIII A chain | 6  |                       | MYVAVWTPYGVLR                                 | 159 | 13 | 6  | 51.1   | b3b4b5y6y7y13                                          | 1554.82 | 90.164  | 80321  | 2 | 777.91  | 1.49   |
| P00488 F13A_HUMAN Coagulation factor XIII A chain | 7  |                       | KDGHVVENVDATHIGK                              | 446 | 17 | 6  | 21.57  | b3*b3b6y2y3y9                                          | 1819.90 | 34.216  | 54035  | 4 | 455.73  | -14.29 |
| P00488 F13A_HUMAN Coagulation factor XIII A chain | 8  |                       | LSIQSSPK                                      | 144 | 8  | 8  | 65.08  | y2y3y4y5*y5y6y7y8                                      | 859.48  | 30.029  | 46751  | 2 | 430.25  | -4.12  |
| P00488 F13A_HUMAN Coagulation factor XIII A chain | 9  |                       | AQMDSLGR                                      | 245 | 8  | 9  | 34.82  | b1b2*b2b4y3*y3y6*y6y8                                  | 877.42  | 29.600  | 42060  | 2 | 439.21  | -1.95  |
| P00488 F13A_HUMAN Coagulation factor XIII A chain | 10 |                       | DGTHVVENVDATHIGK                              | 447 | 16 | 11 | 84.98  | b4b5*b5b7b8b13y3y4y6y7y16                              | 1691.83 | 39.315  | 40226  | 3 | 564.61  | -5.20  |
| P00488 F13A_HUMAN Coagulation factor XIII A chain | 11 |                       | VEYVIGR                                       | 101 | 7  | 4  | 36.13  | b5y5y6y7                                               | 835.46  | 41.792  | 16711  | 2 | 418.23  | -5.99  |
| P00488 F13A_HUMAN Coagulation factor XIII A chain | 12 | Carbamidomethyl+C(14) | NPETDTYILFNPWCEDDAVYLDN EK                    | 175 | 25 | 5  | 18.12  | y2y3y6*y6y12                                           | 3061.34 | 95.604  | 3331   | 2 | 1531.17 | -0.40  |
| P00488 F13A_HUMAN Coagulation factor XIII A chain | 13 |                       | GVNLQEFLNVTSVHLEFK                            | 38  | 17 | 9  | 32.18  | b5*b5b7*b7*b7y3y4y13*y13                               | 1945.03 | 98.936  | 136391 | 3 | 649.02  | -10.23 |
| P00488 F13A_HUMAN Coagulation factor XIII A chain | 14 |                       | ETFVDVTLEPLSFK                                | 571 | 13 | 6  | 43.53  | b3*b3b5b8b9y6                                          | 1525.75 | 47.064  | 72644  | 3 | 509.25  | -21.76 |
| P00488 F13A_HUMAN Coagulation factor XIII A chain | 15 | Carbamidomethyl+C(14) | EIRPNSTVQWEEVCRPWVSGHR                        | 682 | 22 | 4  | 19.74  | b11y4y7y12                                             | 2722.34 | 60.144  | 31080  | 4 | 681.34  | 5.02   |
| P00488 F13A_HUMAN Coagulation factor XIII A chain | 16 |                       | EEYVLNDIGVIFYGEVNDIK                          | 202 | 20 | 6  | 52.22  | b4b6b9b10b13b14                                        | 2329.20 | 71.966  | 30632  | 2 | 1165.10 | 16.67  |
| P00488 F13A_HUMAN Coagulation factor XIII A chain | 17 |                       | SNVDMDFEVENAVLGK                              | 516 | 16 | 4  | 23.94  | y8*y8y10y12                                            | 1766.85 | 98.806  | 18631  | 2 | 883.93  | 15.96  |
| P00488 F13A_HUMAN Coagulation factor XIII A chain | 18 |                       | GQSFYVQIDFSRPYDPR                             | 79  | 17 | 4  | 22.43  | b10*b10b11y6                                           | 2075.02 | 63.257  | 16344  | 3 | 692.34  | 10.47  |
| P00488 F13A_HUMAN Coagulation factor XIII A chain | 19 |                       | VGSAMVNAK                                     | 261 | 9  | 5  | 37.03  | y4y7*y7y8*y8                                           | 876.46  | 24.090  | 16270  | 2 | 438.73  | -5.85  |
| P00488 F13A_HUMAN Coagulation factor XIII A chain | 20 | Carbamidomethyl+C(4)  | YGQCWVFAGVFNTFLR                              | 311 | 16 | 8  | 82.15  | b3b4y3y4y5y6y8y9                                       | 1964.95 | 113.374 | 15174  | 2 | 982.98  | 3.23   |
| P00488 F13A_HUMAN Coagulation factor XIII A chain | 21 |                       | FQEQQEEER                                     | 483 | 9  | 6  | 29.25  | b4*b4*b4y3*y3y7                                        | 1151.49 | 19.616  | 7699   | 2 | 576.25  | -3.29  |
| P00488 F13A_HUMAN Coagulation factor XIII A chain | 22 | Carbamidomethyl+C(8)  | DSVWNYHCWNEAWMTRPDLPV GFGGWQAVDSTPQENS DGM YR | 367 | 42 | 19 | 104.66 | b7b9b11b19b21b23b25b26y4y5y7y8y11*y11y12*y12y14*y14y15 | 4959.15 | 96.350  | 6810   | 3 | 1653.72 | 2.46   |
| P00488 F13A_HUMAN Coagulation factor XIII A chain | 23 |                       | VDHHTDK                                       | 62  | 7  | 3  | 39.14  | b3b5b6                                                 | 851.39  | 86.292  | 4588   | 1 | 851.39  | -10.47 |
| P00488 F13A_HUMAN Coagulation factor XIII A chain | 24 | Carbamidomethyl+C(9)  | LSIQSSPKCIVGK                                 | 144 | 13 | 3  | 27.06  | b4b5b11                                                | 1416.78 | 42.542  | 201387 | 2 | 708.89  | -4.39  |
| P00488 F13A_HUMAN Coagulation factor XIII A chain | 25 |                       | VEYVIGRYPQENK                                 | 101 | 13 | 4  | 27.06  | y6y8y9*y9                                              | 1594.83 | 46.029  | 59805  | 3 | 532.28  | 6.58   |
| P00488 F13A_HUMAN Coagulation factor XIII A chain | 26 |                       | GNPIKVSRL                                     | 253 | 8  | 3  | 39.59  | y4y5y6                                                 | 870.51  | 22.906  | 23585  | 2 | 435.76  | -5.47  |

|                                                    |    |                                        |                                      |     |    |    |        |                                 |         |         |        |   |         |        |
|----------------------------------------------------|----|----------------------------------------|--------------------------------------|-----|----|----|--------|---------------------------------|---------|---------|--------|---|---------|--------|
| [P00488]F13A_HUMAN Coagulation factor XIII A chain | 27 |                                        | QIGGDGMMMDITDTPYKFQEGQEEER           | 468 | 24 | 4  | 12.15  | b6*b6y3y19                      | 2777.21 | 67.423  | 15612  | 3 | 926.41  | 4.13   |
| [P00488]F13A_HUMAN Coagulation factor XIII A chain | 28 |                                        | KLIASMSDSLRL                         | 704 | 12 | 3  | 21.17  | b3b10y8                         | 1307.70 | 76.817  | 12520  | 3 | 436.57  | 4.01   |
| [P00488]F13A_HUMAN Coagulation factor XIII A chain | 29 | Carbamidomethyl+C(17)                  | TSRNPETDTYLFPWCEDDAVYLDNEK           | 172 | 28 | 4  | 14.06  | b3b6y6y11                       | 3405.51 | 89.283  | 11684  | 3 | 1135.84 | -2.94  |
| [P00488]F13A_HUMAN Coagulation factor XIII A chain | 30 |                                        | FQEGQEEERLALETALMYGAK                | 483 | 21 | 4  | 26.21  | b9b12y5y6                       | 2413.16 | 107.196 | 1900   | 3 | 805.06  | -4.86  |
| [P00488]F13A_HUMAN Coagulation factor XIII A chain | 31 | Carbamidomethyl+C(14)                  | EIRPNSTVQWEEVCRPWVSGHRK              | 682 | 23 | 3  | 22.53  | y11y12y21                       | 2850.44 | 105.854 | 1781   | 3 | 950.82  | 6.51   |
| [P00488]F13A_HUMAN Coagulation factor XIII A chain | 32 |                                        | KDGTHVVENVVDATHIGK                   | 446 | 17 | 3  | 24.09  | b3b4b8                          | 1819.92 | 111.237 | 1684   | 2 | 910.46  | -5.57  |
| [P00488]F13A_HUMAN Coagulation factor XIII A chain | 33 | Phosphoryl.STY()                       | GVNLQEFNLVTSVHLFK                    | 38  | 17 | 4  | 15.44  | b9*b9y4y7                       | 2025.01 | 32.020  | 2842   | 3 | 675.68  | -0.06  |
| [P00488]F13A_HUMAN Coagulation factor XIII A chain | 34 | Oxidation+M(1)                         | MYVAVWTPYGVLR                        | 159 | 13 | 4  | 32.54  | b7b9b11y12                      | 1570.83 | 105.325 | 4156   | 2 | 785.92  | 13.60  |
| [P00488]F13A_HUMAN Coagulation factor XIII A chain | 35 | Oxidation+M(9)                         | GTQVVGSMDMTVTVQFTNPLKELLR            | 638 | 24 | 3  | 22.44  | b3b8b9                          | 2637.34 | 111.796 | 2047   | 3 | 879.79  | -4.26  |
| [P00488]F13A_HUMAN Coagulation factor XIII A chain | 36 |                                        | MYVAVWTPYGVLR                        | 159 | 13 | 0  | 3.6    |                                 | 1536.78 | 90.087  | 2123   | 2 | 768.90  | -9.77  |
| [Q99867]TBB4Q_HUMAN Putative tubulin beta-4q chain | 1  |                                        | LAVNMVFPFR                           | 252 | 10 | 14 | 109.18 | b2b3b5*b5y1y3y4y5y6y7y8y9*y9y10 | 1143.63 | 71.952  | 238985 | 2 | 572.32  | -5.12  |
| [Q99867]TBB4Q_HUMAN Putative tubulin beta-4q chain | 2  |                                        | AVLVDLEPGTMDSVR                      | 62  | 15 | 8  | 35.18  | b2b3b11y2y8y9y11y15             | 1601.81 | 70.193  | 49736  | 2 | 801.41  | -3.81  |
| [Q99867]TBB4Q_HUMAN Putative tubulin beta-4q chain | 3  |                                        | IREEYPDR                             | 154 | 8  | 10 | 65.08  | b2b4b5*b5b7y1y2*y2y3y5          | 1077.53 | 23.392  | 42843  | 2 | 539.27  | -0.34  |
| [Q99867]TBB4Q_HUMAN Putative tubulin beta-4q chain | 4  |                                        | MSVTFGTGNNTAVQELKR                   | 362 | 17 | 4  | 22.84  | b7b12*b12b15                    | 1895.94 | 51.284  | 1938   | 2 | 948.47  | -13.46 |
| [Q99867]TBB4Q_HUMAN Putative tubulin beta-4q chain | 5  | Carbamidomethyl+C(23)                  | LPTPTYGDLNHLVSATVSGVTTCRLR           | 216 | 25 | 3  | 11.89  | b4b12y8                         | 2672.39 | 90.288  | 46071  | 3 | 891.47  | 7.49   |
| [Q99867]TBB4Q_HUMAN Putative tubulin beta-4q chain | 6  |                                        | YTEGAELMESVMDVVR                     | 105 | 16 | 4  | 26.27  | b3y4y9y12                       | 1828.81 | 103.712 | 18603  | 2 | 914.91  | -21.16 |
| [Q99867]TBB4Q_HUMAN Putative tubulin beta-4q chain | 7  |                                        | MSVTFGTGNNTAVQELK                    | 362 | 16 | 4  | 33.68  | b4b8b12b13                      | 1739.84 | 89.464  | 16792  | 2 | 870.42  | -16.28 |
| [Q99867]TBB4Q_HUMAN Putative tubulin beta-4q chain | 8  |                                        | FWEVISDEHAIDSAGTYHGDSLQLER           | 19  | 27 | 7  | 38.68  | b5b6b8y10y13y14y19              | 3112.49 | 95.071  | 10069  | 3 | 1038.17 | 16.71  |
| [Q99867]TBB4Q_HUMAN Putative tubulin beta-4q chain | 9  |                                        | VSEQFTATFR                           | 379 | 10 | 7  | 38.46  | b3b4*b4b8*b8*b8y8               | 1185.60 | 44.976  | 4072   | 2 | 593.30  | 10.71  |
| [Q99867]TBB4Q_HUMAN Putative tubulin beta-4q chain | 10 |                                        | LHFFMPGFAPLTSQGSQQYR                 | 262 | 20 | 4  | 13.63  | b7b12y9*y9                      | 2312.12 | 99.560  | 3964   | 3 | 771.38  | -4.43  |
| [Q99867]TBB4Q_HUMAN Putative tubulin beta-4q chain | 11 |                                        | EVDEQMFNIQDK                         | 324 | 12 | 7  | 46.09  | b5b6b8y4*y4y5*y5                | 1495.64 | 21.550  | 2160   | 3 | 499.22  | -19.91 |
| [Q99867]TBB4Q_HUMAN Putative tubulin beta-4q chain | 12 |                                        | SGPFAEVFRPDNFISR                     | 77  | 16 | 4  | 22.77  | b13*b13y10y11                   | 1838.94 | 64.933  | 1649   | 2 | 919.98  | 13.87  |
| [Q99867]TBB4Q_HUMAN Putative tubulin beta-4q chain | 13 | Carbamidomethyl+C(3)                   | HGCYLTAIAIFR                         | 306 | 12 | 4  | 32.67  | b5b6b10y9                       | 1379.70 | 36.396  | 1585   | 2 | 690.35  | 7.61   |
| [Q99867]TBB4Q_HUMAN Putative tubulin beta-4q chain | 14 | Carbamidomethyl+C(18)                  | SGPFAEVFRPDNFISRQCAGNNWAK            | 77  | 26 | 6  | 20.52  | b5b12b15y8y14*y14               | 2925.37 | 83.210  | 26720  | 4 | 732.10  | -5.93  |
| [Q99867]TBB4Q_HUMAN Putative tubulin beta-4q chain | 15 | Carbamidomethyl+C(23)                  | LPTPTYGDLNHLVSATVSGVTTCRLRFPQNLNADLR | 216 | 35 | 3  | 22.94  | b4b8b9                          | 3783.90 | 120.644 | 12566  | 5 | 757.59  | -13.48 |
| [Q99867]TBB4Q_HUMAN Putative tubulin beta-4q chain | 16 | Carbamidomethyl+C(18)                  | NSSYFADWLPNNIKTAVCDIPPWGLK           | 336 | 26 | 3  | 11.67  | b5b12y9                         | 3006.46 | 136.512 | 11941  | 2 | 1503.73 | -8.12  |
| [Q99867]TBB4Q_HUMAN Putative tubulin beta-4q chain | 17 | Carbamidomethyl+C(12)                  | MREIVLTQTGQCGNQIGAK                  | 0   | 19 | 3  | 14.15  | b6b12y10                        | 2104.06 | 86.906  | 2828   | 2 | 1052.53 | -2.44  |
| [Q99867]TBB4Q_HUMAN Putative tubulin beta-4q chain | 18 |                                        | GRYTEGAELMESVMDVVR                   | 103 | 18 | 3  | 22.15  | b10y13y14                       | 2041.98 | 72.988  | 2762   | 2 | 1021.50 | 7.89   |
| [Q99867]TBB4Q_HUMAN Putative tubulin beta-4q chain | 19 | Carbamidomethyl+C(11);Phosphoryl.STY() | REIVLTQTGQCGNQIGAK                   | 1   | 18 | 4  | 23.52  | b8b10b13_H3PO4 b13y9            | 2052.96 | 63.276  | 3201   | 3 | 684.99  | -7.85  |

|                                                         |    |                                            |                                  |     |    |    |        |                                                          |         |        |        |   |         |        |
|---------------------------------------------------------|----|--------------------------------------------|----------------------------------|-----|----|----|--------|----------------------------------------------------------|---------|--------|--------|---|---------|--------|
| Q99867 TBB4Q_HUMAN Putative tubulin beta-4q chain       | 20 | Oxidation+M(5)                             | LHFFMPGFAPLTSQGSQQYR             | 262 | 20 | 5  | 37.08  | b5b6y4y6y7                                               | 2328.12 | 34.081 | 2548   | 3 | 776.71  | -3.25  |
| P24844 MYL9_HUMAN Myosin regulatory light polypeptide 9 | 1  |                                            | LNGTDPEDVIR                      | 93  | 11 | 9  | 79.18  | y1y3y4y5y6y8y9*y9y11                                     | 1228.62 | 47.884 | 118590 | 2 | 614.81  | 2.98   |
| P24844 MYL9_HUMAN Myosin regulatory light polypeptide 9 | 2  |                                            | ATSNVVFAMFDQSQIQEFK              | 17  | 18 | 6  | 27.84  | b4b5y2y4y10y18                                           | 2091.00 | 89.191 | 58630  | 2 | 1046.00 | 5.49   |
| P24844 MYL9_HUMAN Myosin regulatory light polypeptide 9 | 3  |                                            | ELLTTMGDR                        | 124 | 9  | 6  | 52.78  | b9y3y5y6y7y9                                             | 1035.52 | 47.932 | 36626  | 2 | 518.26  | 1.18   |
| P24844 MYL9_HUMAN Myosin regulatory light polypeptide 9 | 4  |                                            | GNFNYYVEFTR                      | 151 | 10 | 5  | 50.22  | y4y5y6*y6y7                                              | 1246.59 | 61.563 | 36397  | 2 | 623.80  | 4.31   |
| P24844 MYL9_HUMAN Myosin regulatory light polypeptide 9 | 5  | Carbamidomethyl+C(5)                       | NAFACFDEEASGFIHEDHLR             | 104 | 20 | 4  | 26.68  | b3b4y3y13                                                | 2364.98 | 80.247 | 29625  | 4 | 592.00  | -19.61 |
| P24844 MYL9_HUMAN Myosin regulatory light polypeptide 9 | 6  |                                            | ELLTTMGDRFTDEEVDEMYR             | 124 | 20 | 4  | 21.76  | b15y3y4*y4                                               | 2450.09 | 75.504 | 23120  | 3 | 817.37  | 3.29   |
| P24844 MYL9_HUMAN Myosin regulatory light polypeptide 9 | 7  |                                            | RPQRATSNVVFAMFDQSQIQEFK          | 13  | 22 | 5  | 36.47  | b3y4y12y13y14                                            | 2628.32 | 79.216 | 3045   | 3 | 876.78  | 6.22   |
| P24844 MYL9_HUMAN Myosin regulatory light polypeptide 9 | 8  | Carbamidomethyl+C(16)                      | LNGTDPEDVIRNAFACFDEEASGF IHEDHLR | 93  | 31 | 5  | 23.93  | b12b13*b13y11y13                                         | 3574.62 | 72.914 | 2937   | 3 | 1192.21 | -3.69  |
| P24844 MYL9_HUMAN Myosin regulatory light polypeptide 9 | 9  |                                            | GNFNYYVEFTRILK                   | 151 | 13 | 3  | 28.83  | b3b6b11                                                  | 1600.85 | 70.247 | 2871   | 3 | 534.29  | 3.28   |
| P24844 MYL9_HUMAN Myosin regulatory light polypeptide 9 | 10 |                                            | DGFIDKEDLHDMLASLGK               | 45  | 18 | 3  | 14.75  | b10y3y12                                                 | 2003.97 | 84.313 | 2646   | 3 | 668.66  | -0.55  |
| P14649 MYL6B_HUMAN Myosin light chain 6B                | 1  |                                            | ALGQNPTNAEVLK                    | 94  | 13 | 20 | 109.48 | b2b4b5*b5b10*b10*b10b11*b11b12*b12y1y2y4y7y8y9y11*y11y13 | 1354.74 | 44.126 | 164170 | 2 | 677.87  | 2.97   |
| P14649 MYL6B_HUMAN Myosin light chain 6B                | 2  | Carbamidomethyl+C(6)                       | ILYSQCGDVMR                      | 83  | 11 | 11 | 63.42  | b2y1y2y3y6y7*y7y8y9y11*y11                               | 1341.64 | 47.762 | 89839  | 2 | 671.32  | 6.01   |
| P14649 MYL6B_HUMAN Myosin light chain 6B                | 3  |                                            | AEPVVPQAPQK                      | 35  | 11 | 5  | 23.16  | b1b5b9y4*y4                                              | 1135.60 | 25.339 | 2401   | 2 | 568.30  | -8.38  |
| P14649 MYL6B_HUMAN Myosin light chain 6B                | 4  |                                            | VDFETFLPMLQAVAK                  | 121 | 15 | 3  | 25.25  | b3b7b10                                                  | 1708.89 | 35.589 | 13743  | 4 | 427.98  | -7.50  |
| P14649 MYL6B_HUMAN Myosin light chain 6B                | 5  |                                            | SDELK                            | 113 | 5  | 1  | 12.75  | y4                                                       | 591.30  | 25.366 | 3306   | 1 | 591.30  | -5.88  |
| P14649 MYL6B_HUMAN Myosin light chain 6B                | 6  |                                            | VLGNPKSDELK                      | 107 | 11 | 3  | 23.16  | b4b9y6                                                   | 1199.67 | 68.739 | 78607  | 2 | 600.34  | 9.56   |
| P14649 MYL6B_HUMAN Myosin light chain 6B                | 7  |                                            | GQGTYEDYLEGFRVFDK                | 138 | 17 | 5  | 39.76  | b11y3y9y10y11                                            | 2023.94 | 77.009 | 7227   | 4 | 506.74  | -1.87  |
| P14649 MYL6B_HUMAN Myosin light chain 6B                | 8  |                                            | NRGQGTYEDYLEGFR                  | 136 | 15 | 3  | 17.17  | b9y6y10                                                  | 1804.83 | 76.049 | 3183   | 2 | 902.92  | 1.69   |
| P14649 MYL6B_HUMAN Myosin light chain 6B                | 9  | Oxidation+M(9)                             | VDFETFLPMLQAVAK                  | 121 | 15 | 3  | 25.25  | b3b9b12                                                  | 1724.88 | 46.041 | 3236   | 3 | 575.63  | -6.23  |
| Q9Y281 COF2_HUMAN Cofilin-2                             | 1  |                                            | KEDLVFIFWAPESAPLK                | 95  | 17 | 8  | 66.72  | b5b6y3y4y7y8y9y17                                        | 1990.05 | 96.708 | 224806 | 3 | 664.02  | -9.81  |
| Q9Y281 COF2_HUMAN Cofilin-2                             | 2  |                                            | YALYDATYETK                      | 81  | 11 | 11 | 78.91  | b2b3b5y2y4*y4y7y8y9y10y11                                | 1337.63 | 51.706 | 163361 | 2 | 669.32  | 2.01   |
| Q9Y281 COF2_HUMAN Cofilin-2                             | 3  |                                            | YALYDATYETKESK                   | 81  | 14 | 3  | 18.27  | b4b8y8                                                   | 1681.79 | 72.528 | 2753   | 3 | 561.27  | -2.61  |
| Q9Y281 COF2_HUMAN Cofilin-2                             | 4  |                                            | HEWQVNLDDIK                      | 132 | 12 | 4  | 31.39  | y4y6*y6y8                                                | 1453.68 | 63.867 | 14704  | 3 | 485.23  | -16.54 |
| Q9Y281 COF2_HUMAN Cofilin-2                             | 5  | Carbamidomethyl+C(5)                       | AVLFCLSDDK                       | 34  | 10 | 3  | 27.48  | b6b7y8                                                   | 1167.57 | 21.618 | 1943   | 3 | 389.86  | -0.84  |
| Q9Y281 COF2_HUMAN Cofilin-2                             | 6  | Carbamidomethyl+C(6)                       | KAVLFCLSDDK                      | 33  | 11 | 6  | 39.88  | b10*b10y3y8y10*y10                                       | 1295.68 | 35.578 | 16778  | 2 | 648.34  | 7.35   |
| Q9Y281 COF2_HUMAN Cofilin-2                             | 7  | Phosphoryl STY(6)                          | MASGVTVNDEVIK                    | 0   | 13 | 5  | 24.35  | b4y8_H3PO4 y8*y8y9*y9                                    | 1442.67 | 55.235 | 2079   | 2 | 721.84  | 12.69  |
| A6NNZ2 TBB8B_HUMAN Tubulin beta-8 chain B               | 1  |                                            | LAVNMVPFPR                       | 252 | 10 | 14 | 109.18 | b2b3b5*b5y1y3y4y5y6y7y8y9*y9y10                          | 1143.63 | 71.952 | 238985 | 2 | 572.32  | -5.12  |
| A6NNZ2 TBB8B_HUMAN Tubulin beta-8 chain B               | 2  | Carbamidomethyl+C(5); Carbamidomethyl+C(7) | EAESCDLQGFQLTHSLGGGTGS GMGTLLISK | 122 | 32 | 4  | 22.6   | y3y4y7y32                                                | 3311.56 | 81.000 | 50613  | 3 | 1104.52 | 7.08   |

|                                             |    |                                                                                                               |                                             |     |    |    |        |                                                |         |         |        |   |         |        |
|---------------------------------------------|----|---------------------------------------------------------------------------------------------------------------|---------------------------------------------|-----|----|----|--------|------------------------------------------------|---------|---------|--------|---|---------|--------|
| A6NNZ2 TBB8B_HUMAN Tubulin beta-8 chain B   | 3  |                                                                                                               | IREEYPDR                                    | 154 | 8  | 10 | 65.08  | b2b4b5°b5b7y1y2°y2y3y5                         | 1077.53 | 23.392  | 42843  | 2 | 539.27  | -0.34  |
| A6NNZ2 TBB8B_HUMAN Tubulin beta-8 chain B   | 4  |                                                                                                               | LHFFMPGFAPLTSR                              | 262 | 14 | 3  | 18.27  | b12y3y12                                       | 1620.83 | 112.804 | 1500   | 2 | 810.92  | -2.64  |
| A6NNZ2 TBB8B_HUMAN Tubulin beta-8 chain B   | 5  | Carbamidomethyl+C(18)                                                                                         | MSATFIGNNAAIQELFTCVSEQFTAMFR                | 362 | 28 | 5  | 19.2   | b4b10b21y5y9                                   | 3184.43 | 75.288  | 26765  | 4 | 796.86  | -18.71 |
| A6NNZ2 TBB8B_HUMAN Tubulin beta-8 chain B   | 6  | Carbamidomethyl+C(21)                                                                                         | GLKMSATFIGNNAAIQELFTCVSEQFTAMFR             | 359 | 31 | 3  | 11.01  | b6b8y7                                         | 3482.65 | 80.699  | 9889   | 3 | 1161.55 | -13.11 |
| A6NNZ2 TBB8B_HUMAN Tubulin beta-8 chain B   | 7  | Carbamidomethyl+C(26)                                                                                         | TLKLPTPTYGDLNHLVSATMSGVTTCLR                | 213 | 28 | 3  | 17.34  | y10y13y22                                      | 3046.58 | 134.880 | 1851   | 3 | 1016.20 | 4.09   |
| A6NNZ2 TBB8B_HUMAN Tubulin beta-8 chain B   | 8  | Phosphoryl STY()                                                                                              | YTEGAELTESVMDVVR                            | 105 | 16 | 6  | 32.9   | b3b8°b8b14y7y11                                | 1878.80 | 59.210  | 29242  | 2 | 939.90  | -6.56  |
| P06753 TPM3_HUMAN Tropomyosin alpha-3 chain | 1  |                                                                                                               | IQLVEEELDR                                  | 91  | 10 | 17 | 110.94 | b2*b2b3b4y2y3y4°y4y5°y5y6y7y8y9°y9*y9y10       | 1243.65 | 58.328  | 293189 | 2 | 622.33  | 0.59   |
| P06753 TPM3_HUMAN Tropomyosin alpha-3 chain | 2  |                                                                                                               | AADAEAEVASLNRR                              | 77  | 14 | 3  | 26.05  | b3b11b12                                       | 1472.73 | 54.321  | 25058  | 2 | 736.87  | -12.60 |
| P06753 TPM3_HUMAN Tropomyosin alpha-3 chain | 3  |                                                                                                               | LATALQK                                     | 105 | 7  | 6  | 48.87  | b4y3y5y6°y6y7                                  | 744.46  | 27.312  | 23328  | 2 | 372.73  | -7.79  |
| P06753 TPM3_HUMAN Tropomyosin alpha-3 chain | 4  |                                                                                                               | AISEELDHALNDMTSI                            | 268 | 16 | 6  | 32.9   | b7b9y10y13*y13y15                              | 1758.81 | 68.567  | 11498  | 3 | 586.94  | -4.23  |
| P06753 TPM3_HUMAN Tropomyosin alpha-3 chain | 5  |                                                                                                               | MELQEIQLK                                   | 140 | 9  | 3  | 29.25  | b6y4y6                                         | 1131.61 | 61.484  | 55899  | 2 | 566.31  | -2.27  |
| P06753 TPM3_HUMAN Tropomyosin alpha-3 chain | 6  |                                                                                                               | QLEDELAAMQK                                 | 37  | 11 | 5  | 23.16  | b6b8°b8y6*y6                                   | 1275.64 | 56.114  | 4753   | 3 | 425.88  | 9.00   |
| P06753 TPM3_HUMAN Tropomyosin alpha-3 chain | 7  |                                                                                                               | KLVIIEGDLER                                 | 167 | 11 | 6  | 53.42  | b3b4y4°y4y5y6                                  | 1284.75 | 56.652  | 29186  | 2 | 642.88  | 1.62   |
| P06753 TPM3_HUMAN Tropomyosin alpha-3 chain | 8  |                                                                                                               | ENALDRAEQAEAEQK                             | 15  | 15 | 4  | 17.17  | b9°b9y4y10                                     | 1701.78 | 53.898  | 5930   | 2 | 851.40  | -11.33 |
| P06753 TPM3_HUMAN Tropomyosin alpha-3 chain | 9  |                                                                                                               | SKQLEDELAAMQK                               | 35  | 13 | 3  | 24.35  | b10b11y8                                       | 1490.77 | 66.139  | 3050   | 3 | 497.59  | 11.46  |
| P06753 TPM3_HUMAN Tropomyosin alpha-3 chain | 10 | Carbamidomethyl+C(1)                                                                                          | CSELEEELKNVTNNLK                            | 189 | 16 | 4  | 24.61  | b11°b11b12b15                                  | 1919.93 | 107.251 | 2499   | 2 | 960.47  | -5.21  |
| P06753 TPM3_HUMAN Tropomyosin alpha-3 chain | 11 | Oxidation+M(9)                                                                                                | QLEDELAAMQKK                                | 37  | 12 | 3  | 21.17  | b6y4y10                                        | 1419.73 | 60.847  | 5384   | 2 | 710.37  | 8.51   |
| Q15942 Zyx_HUMAN Zyxin                      | 1  | Carbamidomethyl+C(10);Carbamidomethyl+C(13);Carbamidomethyl+C(16);Carbamidomethyl+C(34);Carbamidomethyl+C(37) | ALGQLFHIACTCHQCAQQLQGQ QFYSLGAPYCEGCYTDTLEK | 399 | 44 | 10 | 46.14  | b6b12°b12b14b21b31y9y11y12y13                  | 5228.33 | 86.438  | 69715  | 4 | 1307.84 | 3.46   |
| Q15942 Zyx_HUMAN Zyxin                      | 2  |                                                                                                               | SSTKPAAGGTAPLPPWK                           | 184 | 17 | 6  | 15.44  | b8b10b17y1y4y17                                | 1665.92 | 85.048  | 44142  | 2 | 833.46  | 13.26  |
| Q15942 Zyx_HUMAN Zyxin                      | 3  | Carbamidomethyl+C(9)                                                                                          | QNVAVNELCGR                                 | 375 | 11 | 8  | 39.88  | b4*b4y4y6y8*y8y11*y11                          | 1259.63 | 41.408  | 40690  | 2 | 630.32  | 8.04   |
| Q15942 Zyx_HUMAN Zyxin                      | 4  |                                                                                                               | EVEELEQLTQQLMQDMEHPQR                       | 354 | 21 | 13 | 49.98  | b2°b2b4°b4b5°b5y1y3y4y5*y5y7y21                | 2611.21 | 103.775 | 29231  | 3 | 871.07  | -0.94  |
| Q15942 Zyx_HUMAN Zyxin                      | 5  |                                                                                                               | FSPGAPGGSGSQPNQK                            | 279 | 16 | 14 | 90.12  | b5b9°b9b12°y4y6°y6y7*y7y10y11*y11y13y14        | 1515.72 | 27.813  | 14853  | 2 | 758.37  | 3.38   |
| Q15942 Zyx_HUMAN Zyxin                      | 6  |                                                                                                               | GPPASSAPAPK                                 | 253 | 12 | 7  | 57.07  | b2b4b7y4y7y8y10                                | 1076.57 | 21.590  | 9509   | 2 | 538.79  | -4.65  |
| Q15942 Zyx_HUMAN Zyxin                      | 7  | Carbamidomethyl+C(1);Carbamidomethyl+C(4)                                                                     | CNTCGEPITDR                                 | 443 | 11 | 9  | 68.38  | b2b3y5y6°y6y7y8y9°y9                           | 1322.56 | 27.039  | 7866   | 2 | 661.78  | 9.32   |
| Q15942 Zyx_HUMAN Zyxin                      | 8  |                                                                                                               | LGHPEALSAGTGSPPSFTYAQR                      | 295 | 25 | 16 | 71.95  | b3b9b10b11b15°b15y5*y5y6*y6y8°y8y11°y11*y11y12 | 2597.28 | 56.028  | 68493  | 3 | 866.43  | 1.79   |
| Q15942 Zyx_HUMAN Zyxin                      | 9  |                                                                                                               | VNPFPRGDSEPPAPGAQR                          | 35  | 19 | 3  | 21.11  | b8b10b14                                       | 1989.01 | 101.931 | 5714   | 2 | 995.01  | 9.94   |
| Q15942 Zyx_HUMAN Zyxin                      | 10 |                                                                                                               | SPGAPGLTLK                                  | 343 | 11 | 4  | 34.92  | b5b7b9°b9                                      | 1037.59 | 37.300  | 4424   | 3 | 346.54  | -6.94  |

|                                                         |    |                                          |                             |     |    |    |        |                                          |         |         |        |   |         |        |
|---------------------------------------------------------|----|------------------------------------------|-----------------------------|-----|----|----|--------|------------------------------------------|---------|---------|--------|---|---------|--------|
| Q15942 ZYG_HUMAN Zyxin                                  | 11 |                                          | NDPFK                       | 160 | 5  | 1  | 12.75  | b3                                       | 620.30  | 88.799  | 3759   | 1 | 620.30  | -6.99  |
| Q15942 ZYG_HUMAN Zyxin                                  | 12 |                                          | VSSIDLEIDSLSSLLDDMTKNDPFK   | 140 | 25 | 5  | 34.42  | b5°b5b6b7y3                              | 2782.36 | 123.354 | 8053   | 3 | 928.13  | -2.98  |
| Q15942 ZYG_HUMAN Zyxin                                  | 13 |                                          | GPPASSPAPAPKFSVPVTPK        | 253 | 19 | 4  | 23.33  | b6b7°b7b14                               | 1832.97 | 109.809 | 2869   | 3 | 611.66  | -10.52 |
| Q15942 ZYG_HUMAN Zyxin                                  | 14 | Phosphoryl STY(9)                        | SPGAPGPLTLK                 | 343 | 11 | 3  | 23.16  | b7b10y10                                 | 1117.54 | 86.981  | 1806   | 2 | 559.27  | -12.89 |
| P48741 HSP77_HUMAN Putative heat shock 70 kDa protein 7 | 1  |                                          | TTPSYVAFTDTER               | 38  | 13 | 9  | 92.82  | b1y3y4y5y6y7y9y11y13                     | 1487.70 | 54.288  | 61045  | 2 | 744.35  | 0.74   |
| P48741 HSP77_HUMAN Putative heat shock 70 kDa protein 7 | 2  |                                          | TPSSSTQATLEIDSLFEGVDFYK     | 274 | 23 | 9  | 50.24  | b4b5b7b11b14y7y8y12y23                   | 2535.24 | 102.740 | 10250  | 3 | 845.75  | 10.40  |
| P48741 HSP77_HUMAN Putative heat shock 70 kDa protein 7 | 3  |                                          | FADTTVQSDMK                 | 79  | 11 | 5  | 35.11  | b6y3y4y9*y9                              | 1242.56 | 67.270  | 179618 | 3 | 414.86  | -9.23  |
| P48741 HSP77_HUMAN Putative heat shock 70 kDa protein 7 | 4  |                                          | VEILANDQGNR                 | 27  | 11 | 9  | 62.36  | b8°b8b9b10y6*y6y7*y7y10                  | 1228.61 | 98.180  | 142709 | 2 | 614.81  | -12.12 |
| P48741 HSP77_HUMAN Putative heat shock 70 kDa protein 7 | 5  |                                          | ETAAYLQGPVK                 | 130 | 12 | 5  | 21.17  | b3°b3b11y11*y11                          | 1305.66 | 40.539  | 11829  | 3 | 435.89  | -3.27  |
| P48741 HSP77_HUMAN Putative heat shock 70 kDa protein 7 | 6  | Carbamidomethyl+C(14)                    | ELAVGIDLGTTYSCVGVFQQGR      | 5   | 22 | 5  | 24     | b12b16y4y9y16                            | 2370.14 | 89.722  | 8256   | 3 | 790.72  | -16.48 |
| P48741 HSP77_HUMAN Putative heat shock 70 kDa protein 7 | 7  |                                          | HWPFQVVSEGGKPK              | 90  | 14 | 4  | 30.05  | b3b10b13y9                               | 1595.81 | 60.838  | 5851   | 2 | 798.41  | -12.39 |
| P48741 HSP77_HUMAN Putative heat shock 70 kDa protein 7 | 8  |                                          | SQAALNPHNTVFDK              | 58  | 15 | 7  | 24.36  | b10°b10*b10b13y4*y4y8                    | 1612.81 | 65.055  | 3074   | 3 | 538.27  | 0.61   |
| P48741 HSP77_HUMAN Putative heat shock 70 kDa protein 7 | 9  | Phosphoryl STY(5)                        | HAVITVPTYFNSQSR             | 142 | 15 | 5  | 28     | b3b5b11y13*y13                           | 1799.86 | 65.768  | 22082  | 2 | 900.43  | 11.53  |
| P48741 HSP77_HUMAN Putative heat shock 70 kDa protein 7 | 10 | Carbamidomethyl+C(19)<br>;Oxidation+M(1) | MQAPRELAVGIDLGTTYSCVGVFQQGR | 0   | 27 | 7  | 24.32  | b5b8b10°b10*b10b13y13                    | 2969.43 | 104.855 | 22109  | 4 | 743.11  | -10.03 |
| P09493 TPM1_HUMAN Tropomyosin alpha-1 chain             | 1  |                                          | IQLVEEELDR                  | 91  | 10 | 17 | 110.94 | b2*b2b3b4y2y3y4°y4y5°y5y6y7y8y9°y9*y9y10 | 1243.65 | 58.328  | 293189 | 2 | 622.33  | 0.59   |
| P09493 TPM1_HUMAN Tropomyosin alpha-1 chain             | 2  |                                          | LATALQK                     | 105 | 7  | 6  | 48.87  | b4y3y5y6°y6y7                            | 744.46  | 27.312  | 23328  | 2 | 372.73  | -7.79  |
| P09493 TPM1_HUMAN Tropomyosin alpha-1 chain             | 3  |                                          | AISEELDHALNDMTSI            | 268 | 16 | 6  | 32.9   | b7b9y10y13*y13y15                        | 1758.81 | 68.567  | 11498  | 3 | 586.94  | -4.23  |
| P09493 TPM1_HUMAN Tropomyosin alpha-1 chain             | 4  |                                          | YEEEIK                      | 220 | 6  | 1  | 13.2   | y5                                       | 810.38  | 24.368  | 18513  | 2 | 405.70  | -3.92  |
| P09493 TPM1_HUMAN Tropomyosin alpha-1 chain             | 5  |                                          | MEIQEIQLK                   | 140 | 9  | 3  | 44.81  | b3b5b7                                   | 1131.63 | 37.315  | 4495   | 2 | 566.32  | 17.48  |
| P09493 TPM1_HUMAN Tropomyosin alpha-1 chain             | 6  |                                          | LELAEK                      | 70  | 6  | 1  | 13.2   | y3                                       | 702.40  | 54.491  | 3808   | 1 | 702.40  | -0.26  |
| P09493 TPM1_HUMAN Tropomyosin alpha-1 chain             | 7  |                                          | AELSEGK                     | 182 | 7  | 4  | 39.14  | b4y3°y3y6                                | 733.38  | 28.772  | 2485   | 1 | 733.38  | 8.32   |
| P09493 TPM1_HUMAN Tropomyosin alpha-1 chain             | 8  |                                          | AAEDR                       | 30  | 5  | 1  | 12.75  | y3                                       | 561.27  | 37.244  | 2311   | 1 | 561.27  | 13.70  |
| P09493 TPM1_HUMAN Tropomyosin alpha-1 chain             | 9  |                                          | YEEVAR                      | 161 | 6  | 1  | 13.2   | y3                                       | 766.37  | 34.590  | 2159   | 1 | 766.37  | 2.39   |
| P09493 TPM1_HUMAN Tropomyosin alpha-1 chain             | 10 |                                          | AEERAELSEGK                 | 178 | 11 | 3  | 23.16  | b10y5y10                                 | 1218.59 | 68.021  | 29585  | 2 | 609.80  | -7.81  |
| P09493 TPM1_HUMAN Tropomyosin alpha-1 chain             | 11 |                                          | SIDDELELYAQKLNK             | 251 | 15 | 5  | 23.19  | b10b11°b11y10°y10                        | 1779.89 | 136.780 | 4101   | 1 | 1779.89 | -9.05  |
| P09493 TPM1_HUMAN Tropomyosin alpha-1 chain             | 12 | Carbamidomethyl+C(8)                     | AELSEGKCALEEEELK            | 182 | 16 | 6  | 36.01  | b5b8b9b11°b11y9                          | 1834.87 | 105.827 | 2314   | 3 | 612.29  | -4.12  |
| P09493 TPM1_HUMAN Tropomyosin alpha-1 chain             | 13 |                                          | LEKSIDDELELYAQK             | 248 | 16 | 3  | 22.77  | b6y8y9                                   | 1908.94 | 87.543  | 2247   | 3 | 636.99  | -0.58  |
| P09493 TPM1_HUMAN Tropomyosin alpha-1 chain             | 14 |                                          | LATALQK                     | 105 | 7  | 0  | 0.9    |                                          | 726.44  | 27.301  | 5105   | 2 | 363.73  | -4.29  |
| P34931 HS71L_HUMAN Heat shock 70 kDa protein 1L         | 1  |                                          | SINPDEAVAYGAAVQAAILMGDK     | 363 | 23 | 5  | 18.85  | b3b5b8°b8y23                             | 2304.13 | 68.998  | 70011  | 4 | 576.79  | -12.61 |
| P34931 HS71L_HUMAN Heat shock 70 kDa protein 1L         | 2  |                                          | VEIANDQGNR                  | 27  | 11 | 12 | 97.68  | b2b3b4y4°y4y6y7y8y9°y9y10y11             | 1228.63 | 35.212  | 65264  | 2 | 614.82  | 0.10   |

|                                                  |    |                                            |                                 |     |    |    |        |                                                             |         |         |        |   |         |        |
|--------------------------------------------------|----|--------------------------------------------|---------------------------------|-----|----|----|--------|-------------------------------------------------------------|---------|---------|--------|---|---------|--------|
| IP34931 HS71L_HUMAN Heat shock 70 kDa protein 1L | 3  |                                            | TTPSYVAFTDTER                   | 38  | 13 | 9  | 92.82  | b1y3y4y5y6y7y9y11y13                                        | 1487.70 | 54.288  | 61045  | 2 | 744.35  | 0.74   |
| IP34931 HS71L_HUMAN Heat shock 70 kDa protein 1L | 4  |                                            | NQVAMNPQNTVFDAK                 | 58  | 15 | 4  | 17.17  | b5b12y12y15                                                 | 1676.79 | 70.284  | 2713   | 3 | 559.60  | -9.83  |
| IP34931 HS71L_HUMAN Heat shock 70 kDa protein 1L | 5  | Carbamidomethyl+C(14)                      | GIAIGIDLGGTYSCVGVFQH GK         | 5   | 22 | 6  | 23.1   | b2b5y3y4y11y22                                              | 2293.15 | 96.486  | 2162   | 3 | 765.06  | -5.32  |
| IP34931 HS71L_HUMAN Heat shock 70 kDa protein 1L | 6  |                                            | ETA EAF L GHPVTNAVITVPAYFND SQR | 130 | 27 | 7  | 27.26  | b4b7b12b14y4y11*y11                                         | 2947.43 | 51.797  | 4418   | 3 | 983.15  | -8.86  |
| IP34931 HS71L_HUMAN Heat shock 70 kDa protein 1L | 7  |                                            | FNDPVVQADMK                     | 79  | 11 | 5  | 45.64  | b5b7y3y4y6                                                  | 1263.58 | 36.416  | 2533   | 2 | 632.30  | -16.33 |
| IP34931 HS71L_HUMAN Heat shock 70 kDa protein 1L | 8  |                                            | LLQDYFNGRDLNK                   | 350 | 13 | 4  | 28.14  | b3b9y8y11                                                   | 1595.81 | 60.032  | 29749  | 2 | 798.41  | -3.06  |
| IP34931 HS71L_HUMAN Heat shock 70 kDa protein 1L | 9  |                                            | ISESDKNK                        | 563 | 8  | 10 | 65.08  | b3b6°b6y4°y4*y4y5*y5y6*y6                                   | 920.46  | 31.126  | 28891  | 2 | 460.74  | -5.70  |
| IP34931 HS71L_HUMAN Heat shock 70 kDa protein 1L | 10 |                                            | ATAGDTHLGGEDFDNRLVSHFVE EFK     | 222 | 26 | 3  | 11.67  | b11y9y12                                                    | 2891.36 | 65.688  | 22940  | 3 | 964.46  | 0.59   |
| IP34931 HS71L_HUMAN Heat shock 70 kDa protein 1L | 11 |                                            | RTLSSSTQANLEIDSLYEGIDFYTSI TR   | 273 | 28 | 3  | 22.35  | b9b10b15                                                    | 3180.54 | 87.463  | 8096   | 3 | 1060.85 | -8.83  |
| IP34931 HS71L_HUMAN Heat shock 70 kDa protein 1L | 12 |                                            | GENKAFYP EEISSMVLTK             | 110 | 18 | 9  | 45.97  | b4b9b11°b11b12°b12y12°y12y13                                | 2043.00 | 105.208 | 6817   | 3 | 681.67  | -3.05  |
| IP34931 HS71L_HUMAN Heat shock 70 kDa protein 1L | 13 |                                            | IAAKNALESYAFNMK                 | 537 | 15 | 4  | 35.27  | y3y4y7y9                                                    | 1670.85 | 67.260  | 6200   | 4 | 418.47  | -5.70  |
| IP34931 HS71L_HUMAN Heat shock 70 kDa protein 1L | 14 |                                            | EEIERMVLDAEK                    | 514 | 12 | 5  | 45.12  | b4b7b9y5y11                                                 | 1461.72 | 105.815 | 3887   | 2 | 731.37  | -0.33  |
| IP34931 HS71L_HUMAN Heat shock 70 kDa protein 1L | 15 | Carbamidomethyl+C(7)                       | ARFEELCADLFR                    | 301 | 12 | 5  | 21.17  | b4°b4b9y6°y6                                                | 1526.74 | 31.160  | 3782   | 3 | 509.58  | -1.52  |
| IP34931 HS71L_HUMAN Heat shock 70 kDa protein 1L | 16 |                                            | DAGVIAGLNVLRIINEPTAAAIA YG LDK  | 161 | 28 | 5  | 23.6   | b13y5y7y9y11                                                | 2838.57 | 136.342 | 2993   | 3 | 946.86  | -1.20  |
| IP34931 HS71L_HUMAN Heat shock 70 kDa protein 1L | 17 |                                            | YKAEDDEVQR                      | 526 | 9  | 4  | 43.75  | b4y3y5y6                                                    | 1137.55 | 19.678  | 2770   | 2 | 569.28  | 0.32   |
| IP34931 HS71L_HUMAN Heat shock 70 kDa protein 1L | 18 |                                            | SINPDEAVAYGAAVQAAILMGDK SEK     | 363 | 26 | 3  | 11.67  | b11b13y8                                                    | 2648.29 | 102.407 | 2450   | 4 | 662.83  | -11.98 |
| IP34931 HS71L_HUMAN Heat shock 70 kDa protein 1L | 19 |                                            | QTQIFTTYS DNQPGVLIQVYEGER AMTK  | 425 | 28 | 4  | 11.33  | b6y6°y6y11                                                  | 3217.55 | 110.755 | 2180   | 3 | 1073.19 | -11.53 |
| IP34931 HS71L_HUMAN Heat shock 70 kDa protein 1L | 20 | Carbamidomethyl+C(6); Phosphoryl STY(11)   | ELEQMCNPIITK                    | 599 | 12 | 3  | 21.17  | b9y3y11                                                     | 1555.67 | 73.873  | 9069   | 3 | 519.23  | -4.32  |
| IP34931 HS71L_HUMAN Heat shock 70 kDa protein 1L | 21 | Oxidation+M(5)                             | NQVAMNPQNTVFDAK                 | 58  | 15 | 4  | 17.17  | b3b7y8°y8                                                   | 1692.81 | 99.574  | 43714  | 2 | 846.91  | 6.20   |
| IP34931 HS71L_HUMAN Heat shock 70 kDa protein 1L | 22 | Oxidation+M(10)                            | FNDPVVQADMK                     | 79  | 11 | 6  | 35.11  | b5*b5b6b8y8*y8                                              | 1279.60 | 65.705  | 30321  | 2 | 640.30  | 2.10   |
| IP34931 HS71L_HUMAN Heat shock 70 kDa protein 1L | 23 | Oxidation+M(1)                             | MVLDAEK                         | 519 | 7  | 3  | 39.14  | b4b6y4                                                      | 821.41  | 100.058 | 6139   | 1 | 821.41  | 4.38   |
| IP34931 HS71L_HUMAN Heat shock 70 kDa protein 1L | 24 | Oxidation+M(5)                             | NQVAMNPQNTVFDAKR                | 58  | 16 | 4  | 26.94  | b4b5b7y12                                                   | 1848.91 | 71.862  | 3190   | 3 | 616.98  | 4.89   |
| IP02768 ALBU_HUMAN Serum albumin                 | 1  | Carbamidomethyl+C(3)                       | YICENQDSSISK                    | 286 | 12 | 21 | 99.29  | b2b3b8*b8b9*b9b11y2°y2y3°y3y4y9°y9y10°y10*y10y11°y11y12*y12 | 1443.65 | 32.305  | 779358 | 2 | 722.33  | 2.20   |
| IP02768 ALBU_HUMAN Serum albumin                 | 2  | Carbamidomethyl+C(1); Carbamidomethyl+C(2) | CCTESLVNR                       | 499 | 9  | 16 | 78.28  | b2b9*b9y2*y2y3y4y5y6°y6*y6y7°y7*y7y8y9                      | 1138.50 | 31.096  | 138489 | 2 | 569.75  | 2.79   |
| IP02768 ALBU_HUMAN Serum albumin                 | 3  |                                            | VPQVSTPTLVEVSR                  | 438 | 14 | 5  | 47.25  | y8y9y10y11y14                                               | 1511.84 | 59.355  | 93093  | 2 | 756.42  | -0.57  |
| IP02768 ALBU_HUMAN Serum albumin                 | 4  |                                            | LVNEVTEFAK                      | 65  | 10 | 7  | 38.46  | b7y1y5y6y8*y8y10                                            | 1149.61 | 53.698  | 78236  | 2 | 575.31  | -2.55  |
| IP02768 ALBU_HUMAN Serum albumin                 | 5  | Carbamidomethyl+C(14)                      | ALVLIAFAQYLQCCPFEDHVK           | 44  | 21 | 16 | 115.47 | b2b3b4b5b6y2y3y5y7°y7y10y12°y12y15y19y21                    | 2490.27 | 107.353 | 71091  | 3 | 830.76  | -4.41  |

|                                 |    |                                                                         |                                 |     |    |    |        |                                                                                                        |         |        |        |   |         |        |
|---------------------------------|----|-------------------------------------------------------------------------|---------------------------------|-----|----|----|--------|--------------------------------------------------------------------------------------------------------|---------|--------|--------|---|---------|--------|
| P02768 ALBU_HUMAN Serum albumin | 6  | Carbamidomethyl+C(3)                                                    | NECFLQHKDDNPNLPR                | 122 | 16 | 5  | 26.94  | b7y6y7y9°y9                                                                                            | 1996.91 | 42.617 | 56256  | 4 | 499.98  | -11.92 |
| P02768 ALBU_HUMAN Serum albumin | 7  |                                                                         | FQNALLVR                        | 426 | 8  | 7  | 47.56  | b2b4y2y3y4y6y8                                                                                         | 960.56  | 54.541 | 51729  | 2 | 480.78  | -6.74  |
| P02768 ALBU_HUMAN Serum albumin | 8  |                                                                         | AEFAEVSK                        | 249 | 8  | 7  | 65.08  | b3b4b6°b6y4y6y8                                                                                        | 880.44  | 31.927 | 37950  | 2 | 440.72  | -3.40  |
| P02768 ALBU_HUMAN Serum albumin | 9  | Carbamidomethyl+C(3)                                                    | RPCFSALEVDETYVPK                | 508 | 16 | 5  | 23.94  | b7b11b14y2y16                                                                                          | 1910.93 | 64.573 | 20584  | 3 | 637.65  | -2.75  |
| P02768 ALBU_HUMAN Serum albumin | 10 |                                                                         | DLGEENFK                        | 36  | 8  | 4  | 39.59  | y4*y4y5y6                                                                                              | 951.44  | 44.116 | 3652   | 1 | 951.44  | 1.48   |
| P02768 ALBU_HUMAN Serum albumin | 11 |                                                                         | LVTDLTK                         | 257 | 7  | 5  | 48.87  | b5y4y5°y5y6                                                                                            | 789.46  | 37.500 | 650400 | 2 | 395.23  | -17.86 |
| P02768 ALBU_HUMAN Serum albumin | 12 | Carbamidomethyl+C(9);<br>Carbamidomethyl+C(10)                          | ETYGEMADCCA                     | 105 | 12 | 3  | 28.38  | y6y9y10                                                                                                | 1434.54 | 34.890 | 28490  | 2 | 717.78  | 7.32   |
| P02768 ALBU_HUMAN Serum albumin | 13 | Carbamidomethyl+C(3)                                                    | QNCLEFEQLGEYK                   | 413 | 13 | 3  | 24.35  | b9y4y5                                                                                                 | 1657.72 | 65.100 | 24536  | 3 | 553.24  | -20.03 |
| P02768 ALBU_HUMAN Serum albumin | 14 |                                                                         | TYETTLEK                        | 375 | 8  | 3  | 39.59  | b4b5b6                                                                                                 | 984.49  | 31.165 | 23580  | 2 | 492.75  | -2.67  |
| P02768 ALBU_HUMAN Serum albumin | 15 |                                                                         | YLYEIAR                         | 161 | 7  | 4  | 39.14  | b4°b4y3y6                                                                                              | 927.49  | 78.833 | 12952  | 2 | 464.25  | -3.62  |
| P02768 ALBU_HUMAN Serum albumin | 16 |                                                                         | AVMDDFAAFVEK                    | 569 | 12 | 3  | 28.38  | y4y10y11                                                                                               | 1342.62 | 54.495 | 11474  | 3 | 448.21  | -11.46 |
| P02768 ALBU_HUMAN Serum albumin | 17 |                                                                         | SEVAHR                          | 28  | 6  | 1  | 13.2   | b4                                                                                                     | 698.35  | 26.465 | 11066  | 1 | 698.35  | -10.05 |
| P02768 ALBU_HUMAN Serum albumin | 18 | Carbamidomethyl+C(14)                                                   | EFNAETFTFHADICTLSEK             | 524 | 19 | 3  | 21.93  | b13y10y11                                                                                              | 2260.06 | 99.616 | 8096   | 3 | 754.03  | 17.39  |
| P02768 ALBU_HUMAN Serum albumin | 19 |                                                                         | LDELR                           | 205 | 5  | 1  | 12.75  | y4                                                                                                     | 645.35  | 50.888 | 2487   | 1 | 645.35  | -12.48 |
| P02768 ALBU_HUMAN Serum albumin | 20 |                                                                         | AWAVAR                          | 236 | 6  | 1  | 13.2   | b4                                                                                                     | 673.38  | 36.460 | 2322   | 1 | 673.38  | 8.88   |
| P02768 ALBU_HUMAN Serum albumin | 21 |                                                                         | KVPQVSTPTLVEVSR                 | 437 | 15 | 32 | 223.14 | b4*b4b5*b5b6*b6b7°b7b9°<br>b9b10*b10b11y3y4°y4y5°<br>y5y6y7y8°y8y9°y9y10°y10°<br>y11°y11y12*y12y13°y13 | 1639.93 | 54.503 | 899493 | 3 | 547.31  | -6.03  |
| P02768 ALBU_HUMAN Serum albumin | 22 | Carbamidomethyl+C(5);<br>Carbamidomethyl+C(6);<br>Carbamidomethyl+C(13) | VHTECCHGDLLCADRADLAK            | 264 | 22 | 5  | 42.04  | y5y7y8y9y12                                                                                            | 2585.11 | 46.437 | 70966  | 4 | 647.03  | -4.44  |
| P02768 ALBU_HUMAN Serum albumin | 23 | Carbamidomethyl+C(3);<br>Carbamidomethyl+C(16)                          | MPCAEDYLSVVLNQLCVLHEKTP<br>VSDR | 469 | 27 | 5  | 25.57  | b12y5y8y9y12                                                                                           | 3173.54 | 94.437 | 43936  | 3 | 1058.52 | -0.38  |
| P02768 ALBU_HUMAN Serum albumin | 24 | Carbamidomethyl+C(8)                                                    | QEPERNECFLQHK                   | 117 | 13 | 5  | 27.06  | y5y7°y7*y7y8                                                                                           | 1714.78 | 68.060 | 25048  | 2 | 857.89  | -11.46 |
| P02768 ALBU_HUMAN Serum albumin | 25 | Carbamidomethyl+C(3)                                                    | DVCKNYAEAK                      | 337 | 10 | 6  | 46.24  | b6y5°y5y7y9*y9                                                                                         | 1197.57 | 29.423 | 24714  | 2 | 599.29  | 10.91  |
| P02768 ALBU_HUMAN Serum albumin | 26 |                                                                         | EQLKAVMDDFAAFVEK                | 565 | 16 | 4  | 24.61  | b8b9b13°b13                                                                                            | 1840.91 | 85.696 | 14803  | 2 | 920.96  | -3.85  |
| P02768 ALBU_HUMAN Serum albumin | 27 |                                                                         | NYAEAKDVFLGMFLYEYAR             | 341 | 19 | 3  | 14.15  | b11b14y5                                                                                               | 2300.10 | 67.284 | 8193   | 3 | 767.37  | -2.12  |
| P02768 ALBU_HUMAN Serum albumin | 28 | Carbamidomethyl+C(3)                                                    | ETCFAEEGKK                      | 588 | 10 | 3  | 25.72  | b3y6y8                                                                                                 | 1198.56 | 26.070 | 3944   | 3 | 400.19  | 13.34  |
| P02768 ALBU_HUMAN Serum albumin | 29 | Oxidation+M(6)                                                          | DVFLGMFLYEYARR                  | 347 | 14 | 7  | 56.72  | b5b6°b6b7b12y10y11                                                                                     | 1795.86 | 75.280 | 8267   | 2 | 898.43  | -14.27 |
| P02768 ALBU_HUMAN Serum albumin | 30 | Oxidation+M(12)                                                         | NYAEAKDVFLGMFLYEYAR             | 341 | 19 | 3  | 14.15  | b11y7y13                                                                                               | 2316.07 | 76.407 | 4610   | 3 | 772.69  | -14.23 |
| P02768 ALBU_HUMAN Serum albumin | 31 |                                                                         | AEFAEVSK                        | 249 | 8  | 1  | 9.32   | b5                                                                                                     | 862.42  | 31.993 | 15334  | 1 | 862.42  | -2.19  |

|                                                         |    |                       |                                          |     |    |    |        |                                                      |         |         |        |   |         |        |
|---------------------------------------------------------|----|-----------------------|------------------------------------------|-----|----|----|--------|------------------------------------------------------|---------|---------|--------|---|---------|--------|
| [P69905]HBA_HUMAN Hemoglobin subunit alpha              | 1  |                       | VGAHAGEYGAEALER                          | 17  | 15 | 21 | 177.12 | b4b5b7b8b9°b9b10°b10b11b14y1y2°y2y3y4y5y6y7y10y11y15 | 1529.72 | 39.303  | 356146 | 3 | 510.58  | -9.02  |
| [P69905]HBA_HUMAN Hemoglobin subunit alpha              | 2  |                       | MFLSFPTTK                                | 32  | 9  | 13 | 85     | b2b3y2°y2y3y4°y4y5°y5y6y7y8y9                        | 1071.55 | 73.488  | 270529 | 2 | 536.28  | -2.96  |
| [P69905]HBA_HUMAN Hemoglobin subunit alpha              | 3  |                       | VDPVNFK                                  | 93  | 7  | 4  | 39.14  | b3y2y4y6                                             | 818.43  | 41.840  | 34411  | 2 | 409.72  | -7.68  |
| [P69905]HBA_HUMAN Hemoglobin subunit alpha              | 4  |                       | TYFPFDLSHGSAQVK                          | 41  | 16 | 5  | 48.47  | y7y9y10y12y13                                        | 1833.86 | 61.606  | 379889 | 4 | 459.22  | -18.37 |
| [P69905]HBA_HUMAN Hemoglobin subunit alpha              | 5  | Carbamidomethyl+C(5)  | LLSHCLLVTLAAHLPAEFTPAVHASLKD             | 100 | 28 | 5  | 19.2   | b4b6y3y5y7                                           | 3024.59 | 94.769  | 154864 | 4 | 756.90  | -13.24 |
| [P69905]HBA_HUMAN Hemoglobin subunit alpha              | 6  | Carbamidomethyl+C(5)  | LLSHCLLVTLAAHLPAEFTPAVHASLKDFLASVSTVLTSK | 100 | 40 | 11 | 62.52  | b4b5b6°b6b7b14y4y7y9y10y18                           | 4258.29 | 135.862 | 41369  | 5 | 852.46  | -9.98  |
| [P69905]HBA_HUMAN Hemoglobin subunit alpha              | 7  |                       | VLSPADKTNVK                              | 1   | 11 | 14 | 90.87  | b6b7b9°b9y3°y3y4*y4y5y6*y6y9°y9*y9                   | 1171.66 | 25.288  | 40077  | 2 | 586.34  | -3.23  |
| [P69905]HBA_HUMAN Hemoglobin subunit alpha              | 8  |                       | MFLSFPTTKTYFPFDLSHGSAQVK                 | 32  | 25 | 7  | 17.85  | b7°b7y7°y7y12*y12y14                                 | 2886.47 | 109.767 | 2741   | 3 | 962.83  | 13.79  |
| [P69905]HBA_HUMAN Hemoglobin subunit alpha              | 9  |                       | TYFPFDLSHGSAQVKGHGK                      | 41  | 20 | 3  | 21.76  | b5b6y3                                               | 2213.07 | 122.794 | 2655   | 3 | 738.36  | -10.59 |
| [P69905]HBA_HUMAN Hemoglobin subunit alpha              | 10 |                       | KVADALTNVAHVDDMPNALSALSDLHAHK            | 61  | 30 | 3  | 11.09  | b15y7y13                                             | 3124.58 | 100.090 | 1980   | 3 | 1042.20 | -0.86  |
| [P54652]HSP72_HUMAN Heat shock-related 70 kDa protein 2 | 1  |                       | IINEPTAAAIAYGLDKK                        | 172 | 17 | 7  | 35.38  | b2y2y5y10y13y15y17                                   | 1787.97 | 64.158  | 66970  | 3 | 596.66  | -9.01  |
| [P54652]HSP72_HUMAN Heat shock-related 70 kDa protein 2 | 2  |                       | VEIANDQGNR                               | 26  | 11 | 12 | 97.68  | b2b3b4y4°y4y6y7y8y9°y9y10y11                         | 1228.63 | 35.212  | 65264  | 2 | 614.82  | 0.10   |
| [P54652]HSP72_HUMAN Heat shock-related 70 kDa protein 2 | 3  |                       | TTPSYVAFTDTER                            | 37  | 13 | 9  | 92.82  | b1y3y4y5y6y7y9y11y13                                 | 1487.70 | 54.288  | 61045  | 2 | 744.35  | 0.74   |
| [P54652]HSP72_HUMAN Heat shock-related 70 kDa protein 2 | 4  |                       | STAGDTHLGGEDFDNR                         | 223 | 16 | 6  | 22.77  | b2°b2b12y8y9y16                                      | 1691.72 | 37.451  | 22871  | 3 | 564.58  | -4.04  |
| [P54652]HSP72_HUMAN Heat shock-related 70 kDa protein 2 | 5  |                       | VHSAVITVPAYFNDSQR                        | 139 | 17 | 4  | 26.05  | b14y7y9y10                                           | 1903.95 | 63.631  | 17746  | 2 | 952.48  | -6.15  |
| [P54652]HSP72_HUMAN Heat shock-related 70 kDa protein 2 | 6  |                       | TLSSSTQASIEIDSLYEGVDFYTSITR              | 275 | 27 | 5  | 16.88  | b3b5°b5b7y8                                          | 2983.45 | 76.023  | 12936  | 3 | 995.15  | 2.78   |
| [P54652]HSP72_HUMAN Heat shock-related 70 kDa protein 2 | 7  |                       | MVSHLAEFEK                               | 239 | 10 | 8  | 50.42  | b5°b5b9y3°y3y7°y7y8                                  | 1190.61 | 53.207  | 10346  | 2 | 595.81  | 18.35  |
| [P54652]HSP72_HUMAN Heat shock-related 70 kDa protein 2 | 8  | Carbamidomethyl+C(1)  | CQEVINWLDR                               | 576 | 10 | 8  | 37.67  | b6b8°b8°b8y4°y4y9°y9                                 | 1332.63 | 136.330 | 4453   | 1 | 1332.63 | -7.05  |
| [P54652]HSP72_HUMAN Heat shock-related 70 kDa protein 2 | 9  |                       | ELER                                     | 600 | 4  | 2  | 12.3   | b3°b3                                                | 546.29  | 30.127  | 3918   | 1 | 546.29  | -2.23  |
| [P54652]HSP72_HUMAN Heat shock-related 70 kDa protein 2 | 10 |                       | MVQEAER                                  | 520 | 7  | 4  | 36.13  | b5°b5b6y4                                            | 862.42  | 27.736  | 3512   | 1 | 862.42  | 18.61  |
| [P54652]HSP72_HUMAN Heat shock-related 70 kDa protein 2 | 11 |                       | QTVEDEK                                  | 553 | 7  | 6  | 48.87  | b4°b4y3°y3y4y5                                       | 848.42  | 119.542 | 1593   | 1 | 848.42  | 21.01  |
| [P54652]HSP72_HUMAN Heat shock-related 70 kDa protein 2 | 12 |                       | RTLSSSTQASIEIDSLYEGVDFYTSITR             | 274 | 28 | 5  | 16.47  | b8°b8y6y9y18                                         | 3139.51 | 109.743 | 22949  | 4 | 785.63  | -11.04 |
| [P54652]HSP72_HUMAN Heat shock-related 70 kDa protein 2 | 13 |                       | NTTIPTKQTQTFTTYSNDQSSVLVQVYEGER          | 419 | 31 | 3  | 11.01  | b6b13y3                                              | 3535.73 | 125.902 | 22033  | 3 | 1179.25 | 3.38   |
| [P54652]HSP72_HUMAN Heat shock-related 70 kDa protein 2 | 14 |                       | FEDATVQSDMKHWPFR                         | 78  | 16 | 3  | 24.61  | y8y9y14                                              | 1993.92 | 79.166  | 14523  | 3 | 665.31  | -2.76  |
| [P54652]HSP72_HUMAN Heat shock-related 70 kDa protein 2 | 15 |                       | ENKITTNDK                                | 500 | 10 | 4  | 25.72  | b3°b3b6y3                                            | 1175.62 | 49.567  | 10598  | 2 | 588.31  | -8.62  |
| [P54652]HSP72_HUMAN Heat shock-related 70 kDa protein 2 | 16 |                       | DDIDRMVQEAER                             | 515 | 12 | 3  | 34.4   | b7b8b9                                               | 1476.66 | 29.431  | 6439   | 2 | 738.83  | -11.33 |
| [P54652]HSP72_HUMAN Heat shock-related 70 kDa protein 2 | 17 |                       | KFEDATVQSDMK                             | 77  | 12 | 7  | 63.39  | b7y4y5°y5y6y10y11                                    | 1398.65 | 44.064  | 4555   | 2 | 699.83  | -4.10  |
| [P54652]HSP72_HUMAN Heat shock-related 70 kDa protein 2 | 18 | Carbamidomethyl+C(18) | MSARGPAIGIDLGTYSVCVGFVQHGK               | 0   | 26 | 7  | 24.63  | b5°b5b11°b11y11°y11y12                               | 2722.32 | 75.336  | 4415   | 3 | 908.11  | -9.33  |



|                                                                |    |                      |                                      |     |    |    |       |                                           |         |         |        |   |         |        |
|----------------------------------------------------------------|----|----------------------|--------------------------------------|-----|----|----|-------|-------------------------------------------|---------|---------|--------|---|---------|--------|
| P54652 HSP72_HUMAN Heat shock-related 70 kDa protein 2         | 19 | Phosphoryl STY(10)   | NQVAMNPTNTIFDAKR                     | 57  | 16 | 11 | 53.34 | b4b5*b5b8*b8b11_H3PO4<br>b11y7*y7y9*y9y10 | 1899.85 | 44.971  | 9277   | 2 | 950.43  | -10.28 |
| P54652 HSP72_HUMAN Heat shock-related 70 kDa protein 2         | 20 | Phosphoryl STY(8)    | TFPPEEISSMVLTK                       | 113 | 14 | 3  | 18.27 | b4b6_H3PO4 b6y7                           | 1708.80 | 57.808  | 4460   | 2 | 854.90  | 9.00   |
| P54652 HSP72_HUMAN Heat shock-related 70 kDa protein 2         | 21 | Phosphoryl STY(6)    | EIAEAYLGGK                           | 129 | 10 | 5  | 58.2  | b3b5b7_HPO3 b7y3y6                        | 1130.52 | 21.598  | 2220   | 2 | 565.76  | 10.91  |
| P54652 HSP72_HUMAN Heat shock-related 70 kDa protein 2         | 22 | Phosphoryl STY(10)   | NQVAMNPTNTIFDAK                      | 57  | 15 | 6  | 42.79 | b3b5b8*b8b11_H3PO4<br>b11y4               | 1743.77 | 44.924  | 1545   | 2 | 872.39  | 2.03   |
| P54652 HSP72_HUMAN Heat shock-related 70 kDa protein 2         | 23 | Oxidation+M(5)       | NQVAMNPTNTIFDAKR                     | 57  | 16 | 5  | 33.68 | b4b5b11b13*b13                            | 1835.92 | 75.383  | 4439   | 2 | 918.46  | 6.78   |
| P54652 HSP72_HUMAN Heat shock-related 70 kDa protein 2         | 24 | Oxidation+M(1)       | MVSHLAEEFK                           | 239 | 10 | 4  | 25.72 | b7*b7b9y5                                 | 1206.57 | 73.835  | 3909   | 2 | 603.79  | -13.96 |
| P27348 1433T_HUMAN 14-3-3 protein theta                        | 1  |                      | NLLSVAYK                             | 41  | 8  | 7  | 34.82 | b1b4*b4y2y3y6y8                           | 907.52  | 57.340  | 117498 | 2 | 454.26  | -3.63  |
| P27348 1433T_HUMAN 14-3-3 protein theta                        | 2  |                      | QTIDNSQGAYQEAFDISK                   | 139 | 18 | 5  | 20.44 | b6b14y9y16y18                             | 2014.93 | 75.486  | 56148  | 2 | 1007.97 | -2.00  |
| P27348 1433T_HUMAN 14-3-3 protein theta                        | 3  |                      | VISSIEQK                             | 60  | 8  | 4  | 39.59 | y4y6y7y8                                  | 903.51  | 28.272  | 28083  | 2 | 452.26  | -5.94  |
| P27348 1433T_HUMAN 14-3-3 protein theta                        | 4  |                      | TAFDEAIAELDTLNEDSYKDSLIMQLLR         | 193 | 29 | 8  | 21.33 | b2*b2b6b7*b7b12y5y29                      | 3315.65 | 128.209 | 11558  | 3 | 1105.89 | 5.82   |
| P27348 1433T_HUMAN 14-3-3 protein theta                        | 5  |                      | KEMQPTHPIR                           | 157 | 10 | 9  | 52.18 | b2*b2b3*b3b4y2y3y6y7                      | 1236.64 | 19.688  | 3042   | 3 | 412.88  | -13.33 |
| P27348 1433T_HUMAN 14-3-3 protein theta                        | 6  |                      | EMQPTHPIR                            | 158 | 9  | 5  | 43.75 | b4b6b7*b7y3                               | 1108.55 | 26.316  | 14655  | 2 | 554.78  | -5.51  |
| P27348 1433T_HUMAN 14-3-3 protein theta                        | 7  |                      | TAFDEAIAELDTLNEDSYK                  | 193 | 19 | 3  | 21.11 | b3b8b10                                   | 2144.97 | 63.192  | 10947  | 3 | 715.66  | -10.24 |
| P27348 1433T_HUMAN 14-3-3 protein theta                        | 8  |                      | AVTEQGAELSNEER                       | 27  | 14 | 7  | 43.31 | b10b11*b11y3*y3y8y10                      | 1532.71 | 45.930  | 4603   | 2 | 766.86  | -8.12  |
| P27348 1433T_HUMAN 14-3-3 protein theta                        | 9  |                      | VESELR                               | 85  | 6  | 1  | 13.2  | b4                                        | 732.39  | 29.515  | 2663   | 1 | 732.39  | -3.50  |
| O15145 ARPC3_HUMAN Actin-related protein 2/3 complex subunit 3 | 1  |                      | LIGNMALLPIR                          | 14  | 11 | 5  | 35.11 | b2b3y5y6y9                                | 1210.73 | 82.078  | 26039  | 2 | 605.87  | -4.84  |
| O15145 ARPC3_HUMAN Actin-related protein 2/3 complex subunit 3 | 2  |                      | DTDIVDEAIYYFK                        | 37  | 13 | 6  | 19.58 | b12b13*b13y9y12y13                        | 1591.76 | 94.976  | 2384   | 2 | 796.38  | 4.60   |
| O15145 ARPC3_HUMAN Actin-related protein 2/3 complex subunit 3 | 3  |                      | MPAYHSSLMDPDTK                       | 0   | 14 | 3  | 18.27 | b3y7y11                                   | 1592.72 | 31.925  | 12688  | 2 | 796.86  | 7.74   |
| O15145 ARPC3_HUMAN Actin-related protein 2/3 complex subunit 3 | 4  |                      | VFDPNQDKPSK                          | 147 | 11 | 12 | 84.93 | b3b5*b5*b5b6b7*b7b10y7°<br>y7*y7y8        | 1274.63 | 27.127  | 5629   | 3 | 425.55  | -8.14  |
| O15145 ARPC3_HUMAN Actin-related protein 2/3 complex subunit 3 | 5  |                      | SQGEK                                | 88  | 5  | 1  | 12.75 | b4                                        | 548.26  | 27.105  | 4646   | 1 | 548.26  | -6.35  |
| O15145 ARPC3_HUMAN Actin-related protein 2/3 complex subunit 3 | 6  | Carbamidomethyl+C(2) | LCEKVFDPQNDKPSK                      | 143 | 15 | 7  | 28    | b4*b4b7b9*b9y11*y11                       | 1804.91 | 73.831  | 97358  | 3 | 602.31  | 9.67   |
| O15145 ARPC3_HUMAN Actin-related protein 2/3 complex subunit 3 | 7  |                      | SQFKGPAPR                            | 25  | 9  | 4  | 52.78 | b5b6b7b8                                  | 987.54  | 25.311  | 7374   | 2 | 494.28  | 7.23   |
| O15145 ARPC3_HUMAN Actin-related protein 2/3 complex subunit 3 | 8  |                      | MPAYHSSLMDPDTKLIGNMALLPIR            | 0   | 25 | 5  | 24.86 | b6*b6b14y3y4                              | 2784.46 | 82.064  | 6151   | 3 | 928.82  | 12.80  |
| O15145 ARPC3_HUMAN Actin-related protein 2/3 complex subunit 3 | 9  |                      | EMYTLGITNFPIGEPGFPLNAIYAKPANKQEDEVMR | 93  | 37 | 9  | 36.68 | b9*b9b10*b10b11°b11y8°y8y11               | 4151.02 | 107.301 | 4042   | 3 | 1384.34 | -10.82 |

|                                                                |    |                                                                                                    |                                           |     |    |    |       |                                     |         |         |        |   |         |        |
|----------------------------------------------------------------|----|----------------------------------------------------------------------------------------------------|-------------------------------------------|-----|----|----|-------|-------------------------------------|---------|---------|--------|---|---------|--------|
| O15145 ARPC3_HUMAN Actin-related protein 2/3 complex subunit 3 | 10 |                                                                                                    | QFMNKSLSGPGQ                              | 166 | 12 | 3  | 25.15 | b5y5y6                              | 1293.63 | 53.785  | 3303   | 2 | 647.32  | 4.06   |
| O15145 ARPC3_HUMAN Actin-related protein 2/3 complex subunit 3 | 11 | Carbamidomethyl+C(8)                                                                               | QETGLRLCEK                                | 137 | 10 | 5  | 39.43 | b4b5*b5y5y7                         | 1233.62 | 67.404  | 3186   | 2 | 617.31  | -7.62  |
| O15145 ARPC3_HUMAN Actin-related protein 2/3 complex subunit 3 | 12 | Carbamidomethyl+C(15)                                                                              | VFDPQNDKPSKWWTCFVK                        | 147 | 18 | 6  | 29.21 | b4b9*b9b14y4y8                      | 2282.08 | 36.428  | 2180   | 3 | 761.36  | -12.41 |
| O15145 ARPC3_HUMAN Actin-related protein 2/3 complex subunit 3 | 13 | Oxidation+M(7)                                                                                     | SQGEKEMYTLGITNFPPIGEPGFPL<br>NAIYAKPANK   | 88  | 35 | 4  | 16.58 | b3b5*b5b14                          | 3808.96 | 105.165 | 6749   | 4 | 953.00  | 10.06  |
| O15145 ARPC3_HUMAN Actin-related protein 2/3 complex subunit 3 | 14 | Oxidation+M(1)                                                                                     | MPAYHSSLMDPDTK                            | 0   | 14 | 4  | 18.27 | b5b8*b8y4                           | 1608.70 | 31.944  | 4772   | 2 | 804.85  | -1.52  |
| P05106 ITB3_HUMAN Integrin beta-3                              | 1  | Carbamidomethyl+C(27)                                                                              | IGFGAFVDKPVSPYMYISPEALE<br>NPCYDMK        | 176 | 31 | 9  | 47.75 | b18y2y3y4y12y13y14y18y<br>31        | 3535.67 | 93.547  | 63730  | 3 | 1179.23 | 2.42   |
| P05106 ITB3_HUMAN Integrin beta-3                              | 2  |                                                                                                    | NDASHLLVFTTDAK                            | 265 | 14 | 6  | 36.97 | b2b6b7y3y4y14                       | 1531.76 | 62.567  | 62146  | 3 | 511.26  | -9.40  |
| P05106 ITB3_HUMAN Integrin beta-3                              | 3  | Carbamidomethyl+C(2);<br>Carbamidomethyl+C(4);<br>Carbamidomethyl+C(9)                             | YCECDDFSCVR                               | 545 | 11 | 5  | 34.92 | y2y7y8y9y11                         | 1510.55 | 44.489  | 39377  | 2 | 755.78  | 7.60   |
| P05106 ITB3_HUMAN Integrin beta-3                              | 4  | Carbamidomethyl+C(4);<br>Carbamidomethyl+C(12)                                                     | TDTCMSSNGLLCSGR                           | 589 | 15 | 6  | 35.27 | y4*y4y8y10y11y15                    | 1658.71 | 47.884  | 39318  | 2 | 829.86  | 7.51   |
| P05106 ITB3_HUMAN Integrin beta-3                              | 5  | Carbamidomethyl+C(3)                                                                               | DNCAPESIEFPVSEAR                          | 72  | 16 | 5  | 24.61 | y5y6y12*y12y16                      | 1820.82 | 62.869  | 37449  | 2 | 910.92  | 6.77   |
| P05106 ITB3_HUMAN Integrin beta-3                              | 6  |                                                                                                    | EATSTFTNITYR                              | 774 | 12 | 11 | 66.4  | b11*b11y3y5*y5y6*y6y8*y<br>8y9y12   | 1403.68 | 52.671  | 36575  | 2 | 702.35  | 2.78   |
| P05106 ITB3_HUMAN Integrin beta-3                              | 7  | Carbamidomethyl+C(3);<br>Carbamidomethyl+C(5);<br>Carbamidomethyl+C(8);<br>Carbamidomethyl+C(10)   | GECLCGQCVCHSSDFGK                         | 524 | 17 | 13 | 96.31 | b2*b2b3*b3y2y3y5y6y8y9y<br>10y12y15 | 2000.79 | 38.784  | 17106  | 2 | 1000.90 | 9.27   |
| P05106 ITB3_HUMAN Integrin beta-3                              | 8  | Carbamidomethyl+C(1);<br>Carbamidomethyl+C(10);<br>Carbamidomethyl+C(12);<br>Carbamidomethyl+C(25) | CGPGWLGSQCECEEDYRPSQQD<br>ECSPR           | 487 | 28 | 3  | 11.33 | b5b9y12                             | 3374.33 | 52.458  | 20400  | 3 | 1125.45 | 3.55   |
| P05106 ITB3_HUMAN Integrin beta-3                              | 9  | Carbamidomethyl+C(12)                                                                              | LAGIVQPNDGQCHVGSDNHYSAS<br>TTMDYPSLGLMTEK | 287 | 37 | 4  | 12.03 | b4b16y5y10                          | 3993.83 | 71.012  | 10139  | 3 | 1331.95 | 5.87   |
| P05106 ITB3_HUMAN Integrin beta-3                              | 10 |                                                                                                    | QVEDYPVDIYYLMDLSYSMK                      | 131 | 20 | 5  | 18.55 | b8b11y7y11*y11                      | 2472.18 | 74.470  | 9359   | 3 | 824.73  | 19.85  |
| P05106 ITB3_HUMAN Integrin beta-3                              | 11 |                                                                                                    | IGDTVFSFSIEAK                             | 416 | 12 | 3  | 21.17 | b4b10y9                             | 1266.65 | 60.188  | 8840   | 2 | 633.83  | -8.87  |
| P05106 ITB3_HUMAN Integrin beta-3                              | 12 | Carbamidomethyl+C(3)                                                                               | TTCLPMFGYK                                | 207 | 10 | 4  | 27.48 | b4b5*b5y6                           | 1217.59 | 51.791  | 3015   | 2 | 609.30  | 20.55  |
| P05106 ITB3_HUMAN Integrin beta-3                              | 13 | Carbamidomethyl+C(5)                                                                               | DAVNCTYK                                  | 676 | 8  | 6  | 46.31 | b3*b3b4*b4y4y5                      | 970.42  | 19.680  | 2543   | 2 | 485.71  | -13.96 |
| P05106 ITB3_HUMAN Integrin beta-3                              | 14 |                                                                                                    | NFSIQVR                                   | 124 | 7  | 6  | 39.14 | b4*b4b5*b5b6*b6                     | 863.47  | 27.100  | 2048   | 2 | 432.24  | -4.88  |
| P05106 ITB3_HUMAN Integrin beta-3                              | 15 |                                                                                                    | IGDTVFSFSIEAKVR                           | 416 | 14 | 6  | 43.31 | b6*b6b7y6y8y11                      | 1521.85 | 91.618  | 449081 | 2 | 761.43  | 13.48  |
| P05106 ITB3_HUMAN Integrin beta-3                              | 16 |                                                                                                    | VLEDRPLSDKGGSDSSQVTQVSP<br>QR             | 88  | 25 | 12 | 73.36 | b5b7b9b14b17*b17b18y3*<br>y3y4y6y7  | 2685.32 | 39.214  | 78195  | 4 | 672.09  | -7.09  |
| P05106 ITB3_HUMAN Integrin beta-3                              | 17 |                                                                                                    | GSGDSSQVTQVSPQRIALR                       | 98  | 19 | 4  | 14.15 | b15*b15b18y4                        | 1986.01 | 76.998  | 40324  | 3 | 662.68  | -11.80 |

|                                                      |    |                                           |                                   |     |    |    |        |                                              |         |         |        |   |         |        |
|------------------------------------------------------|----|-------------------------------------------|-----------------------------------|-----|----|----|--------|----------------------------------------------|---------|---------|--------|---|---------|--------|
| P05106 ITB3_HUMAN Integrin beta-3                    | 18 |                                           | FEEERAR                           | 755 | 7  | 4  | 36.13  | b3y5°y5y6                                    | 936.44  | 31.146  | 19172  | 2 | 468.72  | -14.27 |
| P05106 ITB3_HUMAN Integrin beta-3                    | 19 |                                           | EATSTFTNITYRGT                    | 774 | 14 | 5  | 37.87  | b5b8b11y5y7                                  | 1561.74 | 53.278  | 6597   | 2 | 781.37  | -7.58  |
| P05106 ITB3_HUMAN Integrin beta-3                    | 20 | Carbamidomethyl+C(8)                      | ENLLKDNCAPESEIPEVSEAR             | 67  | 21 | 3  | 22.83  | y6y7y12                                      | 2418.18 | 67.717  | 2969   | 2 | 1209.60 | 9.89   |
| P05106 ITB3_HUMAN Integrin beta-3                    | 21 |                                           | NFSIQVRQVEDYPVDIYYLMDLSY<br>SMK   | 124 | 27 | 4  | 16.88  | b11y4y11y22                                  | 3316.63 | 78.583  | 2645   | 3 | 1106.22 | 13.10  |
| P05106 ITB3_HUMAN Integrin beta-3                    | 22 | Carbamidomethyl+C(18)                     | NRDAPEGGFDAIMQATVCDEK             | 240 | 21 | 5  | 13.18  | b6*b6y7y15°y15                               | 2324.02 | 76.406  | 1725   | 3 | 775.34  | -4.62  |
| P05106 ITB3_HUMAN Integrin beta-3                    | 23 |                                           | WDTANNPLYKEATSTFTNITYR            | 764 | 22 | 9  | 24     | b3b10*b10y3°y3y8*y8y10<br>*y10               | 2606.25 | 135.914 | 1567   | 2 | 1303.63 | -0.56  |
| P05106 ITB3_HUMAN Integrin beta-3                    | 24 | Phosphoryl STY(13)                        | WDTANNPLYKEATSTFTNITYR            | 764 | 22 | 6  | 24     | b7b9b11*b11y9y12_H3PO<br>4 y12               | 2686.21 | 86.326  | 3313   | 2 | 1343.61 | 1.45   |
| P05106 ITB3_HUMAN Integrin beta-3                    | 25 | Carbamidomethyl+C(18)<br>;Oxidation+M(13) | NRDAPEGGFDAIMQATVCDEK             | 240 | 21 | 5  | 17.76  | b8b13y3°y3y8                                 | 2340.01 | 40.596  | 8208   | 3 | 780.68  | -4.28  |
| P07951 TPM2_HUMAN Tropomyosin<br>beta chain          | 1  |                                           | IQLVEEELDR                        | 91  | 10 | 17 | 110.94 | b2*b2b3b4y2y3y4°y4y5°y5<br>y6y7y8y9°y9*y9y10 | 1243.65 | 58.328  | 293189 | 2 | 622.33  | 0.59   |
| P07951 TPM2_HUMAN Tropomyosin<br>beta chain          | 2  |                                           | LATALQK                           | 105 | 7  | 6  | 48.87  | b4y3y5y6°y6y7                                | 744.46  | 27.312  | 23328  | 2 | 372.73  | -7.79  |
| P07951 TPM2_HUMAN Tropomyosin<br>beta chain          | 3  |                                           | LEQA EK                           | 70  | 6  | 3  | 28.95  | b3b5°b5                                      | 717.38  | 26.318  | 6244   | 2 | 359.19  | 0.51   |
| P07951 TPM2_HUMAN Tropomyosin<br>beta chain          | 4  |                                           | TIDDLEDEVYAQK                     | 251 | 13 | 4  | 19.58  | b7y6y10*y10                                  | 1538.74 | 31.122  | 3311   | 3 | 513.58  | 9.76   |
| P07951 TPM2_HUMAN Tropomyosin<br>beta chain          | 5  |                                           | QLEEEQALQKK                       | 37  | 12 | 3  | 28.38  | b7b9b10                                      | 1471.78 | 44.883  | 19700  | 2 | 736.40  | 6.05   |
| P07951 TPM2_HUMAN Tropomyosin<br>beta chain          | 6  |                                           | LEEAEKAADER                       | 112 | 13 | 8  | 84.56  | b3b7y3y4y5y6y8y9                             | 1476.68 | 23.426  | 18657  | 3 | 492.90  | -2.73  |
| P07951 TPM2_HUMAN Tropomyosin<br>beta chain          | 7  | Carbamidomethyl+C(8)                      | AEVAESKCGDLEELK                   | 182 | 16 | 9  | 32.9   | b3b8°b8b12°b12y9°y9y11°<br>y11               | 1806.83 | 46.541  | 18461  | 2 | 903.92  | -5.54  |
| P07951 TPM2_HUMAN Tropomyosin<br>beta chain          | 8  |                                           | IQLVEEELDRAQER                    | 91  | 14 | 6  | 18.27  | b7°b7*b7y4°y4y11                             | 1727.89 | 57.824  | 12107  | 3 | 576.63  | -4.03  |
| P07951 TPM2_HUMAN Tropomyosin<br>beta chain          | 9  |                                           | EAETRAEFAER                       | 233 | 11 | 3  | 26.17  | b4y9y10                                      | 1308.62 | 63.757  | 11563  | 2 | 654.81  | 1.40   |
| P07951 TPM2_HUMAN Tropomyosin<br>beta chain          | 10 |                                           | EDKYEEIEK                         | 217 | 9  | 3  | 29.25  | b4y3y4                                       | 1182.56 | 29.423  | 3126   | 2 | 591.78  | 4.34   |
| P07951 TPM2_HUMAN Tropomyosin<br>beta chain          | 11 |                                           | SLEAQADKYSTK                      | 205 | 12 | 4  | 25.15  | b6y6°y6y7                                    | 1340.67 | 35.562  | 3046   | 3 | 447.56  | -2.73  |
| P07951 TPM2_HUMAN Tropomyosin<br>beta chain          | 12 |                                           | AMKDEEK                           | 133 | 7  | 4  | 39.14  | b4y4y6°y6                                    | 850.40  | 124.721 | 2995   | 1 | 850.40  | -2.58  |
| O75083 WDR1_HUMAN WD repeat-<br>containing protein 1 | 1  |                                           | VFASLPQVER                        | 7   | 10 | 8  | 38.46  | b1b2b3y5*y5y7y8y10                           | 1145.63 | 57.908  | 57928  | 2 | 573.32  | 0.64   |
| O75083 WDR1_HUMAN WD repeat-<br>containing protein 1 | 2  |                                           | SYTSGSHDGHINYWDSETGENDS<br>FAGK   | 334 | 28 | 5  | 21.54  | b1b12y7y8y28                                 | 3136.30 | 58.926  | 50866  | 4 | 784.83  | -6.07  |
| O75083 WDR1_HUMAN WD repeat-<br>containing protein 1 | 3  |                                           | YEQPFAGK                          | 95  | 9  | 5  | 29.25  | b7y7y8y9*y9                                  | 1102.53 | 48.086  | 39852  | 2 | 551.77  | 5.43   |
| O75083 WDR1_HUMAN WD repeat-<br>containing protein 1 | 4  |                                           | GNNFLYTNGK                        | 28  | 10 | 9  | 38.46  | b6y2y5*y5y6°y6*y6y8y10                       | 1127.55 | 44.096  | 31712  | 2 | 564.28  | 3.25   |
| O75083 WDR1_HUMAN WD repeat-<br>containing protein 1 | 5  |                                           | AHDGGIYAIWSPDSTHLLSASGD<br>K      | 231 | 25 | 11 | 37.27  | b2b3b6b7°b7b11°b11b18y<br>3y1y25             | 2585.20 | 71.852  | 28517  | 4 | 647.06  | -8.59  |
| O75083 WDR1_HUMAN WD repeat-<br>containing protein 1 | 6  |                                           | IAVVGEGR                          | 116 | 8  | 6  | 65.08  | y3y4y5y6y7y8                                 | 800.46  | 31.039  | 19958  | 2 | 400.73  | -7.85  |
| O75083 WDR1_HUMAN WD repeat-<br>containing protein 1 | 7  | Carbamidomethyl+C(26)                     | IWDVSVNSVSTFPMGSTVLDDQ<br>LGCLWQK | 259 | 30 | 5  | 28.69  | b4b8b16y10y11                                | 3394.69 | 111.130 | 9215   | 3 | 1132.23 | 1.65   |
| O75083 WDR1_HUMAN WD repeat-<br>containing protein 1 | 8  |                                           | FATASADGQIYYDGK                   | 203 | 16 | 4  | 16.24  | b10y4y11°y11                                 | 1719.84 | 58.708  | 2053   | 2 | 860.43  | 12.42  |

|                                                  |    |                       |                                          |     |    |    |       |                                       |         |         |        |   |         |        |
|--------------------------------------------------|----|-----------------------|------------------------------------------|-----|----|----|-------|---------------------------------------|---------|---------|--------|---|---------|--------|
| O75083 WDR1_HUMAN WD repeat-containing protein 1 | 9  |                       | NIDNPALADIYTEHAHQVVVAK                   | 43  | 22 | 14 | 85.55 | b3b4b6b7*b7b9*b9y3y13y16*y16y17y18y20 | 2418.20 | 61.386  | 193915 | 4 | 605.31  | -16.36 |
| O75083 WDR1_HUMAN WD repeat-containing protein 1 | 10 |                       | VVTVFSVADGYSENNVFYGHHA<br>K              | 511 | 23 | 3  | 22.53 | y3y6y7                                | 2540.23 | 73.158  | 45037  | 4 | 635.81  | 4.90   |
| O75083 WDR1_HUMAN WD repeat-containing protein 1 | 11 |                       | DHLLSVLSGYINYLDR                         | 289 | 17 | 4  | 26.05 | b13y9y10y12                           | 1964.99 | 84.408  | 13943  | 3 | 655.67  | -6.65  |
| O75083 WDR1_HUMAN WD repeat-containing protein 1 | 12 | Carbamidomethyl+C(4)  | FVNCVR                                   | 190 | 6  | 3  | 38.69 | y3y4y5                                | 794.40  | 27.107  | 13573  | 2 | 397.70  | -3.53  |
| O75083 WDR1_HUMAN WD repeat-containing protein 1 | 13 |                       | FGAVFLWDSGSSVGEITGHNK                    | 126 | 21 | 7  | 42.64 | b12y3y5y9y13*y13y15                   | 2208.08 | 96.263  | 9554   | 3 | 736.70  | 5.75   |
| O75083 WDR1_HUMAN WD repeat-containing protein 1 | 14 |                       | LDVQPK                                   | 405 | 6  | 1  | 13.2  | b5                                    | 699.40  | 34.359  | 4574   | 1 | 699.40  | -3.49  |
| O75083 WDR1_HUMAN WD repeat-containing protein 1 | 15 |                       | FTIGDHSR                                 | 182 | 8  | 5  | 47.56 | b3b4*b4b5y3                           | 932.45  | 115.380 | 1845   | 1 | 932.45  | -9.23  |
| O75083 WDR1_HUMAN WD repeat-containing protein 1 | 16 |                       | YAPSGFYASGDVSGK                          | 65  | 16 | 3  | 24.61 | b3b8b9                                | 1618.76 | 93.588  | 1805   | 3 | 540.26  | -6.33  |
| O75083 WDR1_HUMAN WD repeat-containing protein 1 | 17 |                       | AHDGGIYAISWSPDSTHLLSASGD<br>KTSK         | 231 | 28 | 10 | 52.67 | b7b8b10b11y5*y5y7y10*y10y13           | 2901.38 | 67.558  | 38343  | 4 | 726.10  | -7.32  |
| O75083 WDR1_HUMAN WD repeat-containing protein 1 | 18 | Carbamidomethyl+C(2)  | KCFSIDNPGYEPEVVAVHPGGDT<br>VAIGGVDGNVR   | 436 | 34 | 4  | 38.91 | y4y5y7y8                              | 3525.69 | 68.218  | 25411  | 4 | 882.18  | -4.99  |
| O75083 WDR1_HUMAN WD repeat-containing protein 1 | 19 | Carbamidomethyl+C(15) | QSRPYRLATGSDDNCAAFEGPPF<br>K             | 155 | 25 | 5  | 21.43 | b14y12*y12y13*y13                     | 2831.32 | 68.630  | 9563   | 3 | 944.44  | -0.26  |
| O75083 WDR1_HUMAN WD repeat-containing protein 1 | 20 |                       | SYIYSGSHDGHINYWDSETGENDS<br>FAGKGHTNQVSR | 334 | 36 | 4  | 22.49 | b4*b4y13y14                           | 4015.79 | 70.974  | 4245   | 3 | 1339.27 | 10.27  |
| O75083 WDR1_HUMAN WD repeat-containing protein 1 | 21 | Carbamidomethyl+C(2)  | VCALGGSKAHDGGIYAISWSPDST<br>HLLSASGDK    | 223 | 33 | 4  | 14.95 | b15y4y7y12                            | 3357.66 | 109.876 | 3096   | 3 | 1119.89 | 13.16  |
| O75083 WDR1_HUMAN WD repeat-containing protein 1 | 22 | Carbamidomethyl+C(6)  | TGEKVCALGGSK                             | 219 | 12 | 4  | 25.15 | b8b9*b9y3                             | 1206.60 | 64.914  | 2763   | 2 | 603.81  | -8.80  |
| O75083 WDR1_HUMAN WD repeat-containing protein 1 | 23 | Carbamidomethyl+C(3)  | IVCLAWSPDNEHFASGGMDDMV<br>YVWTLSDPETRVK  | 534 | 35 | 7  | 29.04 | b4b7*b7b9*b9b12b21                    | 4041.83 | 128.375 | 1896   | 4 | 1011.21 | -7.97  |
| O75083 WDR1_HUMAN WD repeat-containing protein 1 | 24 |                       | DIAWTEDSKR                               | 106 | 10 | 3  | 27.48 | b4y6y7                                | 1220.60 | 57.892  | 1890   | 1 | 1220.60 | 8.20   |
| O75083 WDR1_HUMAN WD repeat-containing protein 1 | 25 | Carbamidomethyl+C(4)  | FVNCVRFSPDGNR                            | 190 | 13 | 3  | 27.06 | y6y7y10                               | 1567.76 | 137.669 | 1752   | 2 | 784.38  | 11.06  |
| O75083 WDR1_HUMAN WD repeat-containing protein 1 | 26 |                       | FATASADGGIYIDGKTGEK                      | 203 | 20 | 4  | 18.55 | b7b10y8y11                            | 2135.02 | 100.678 | 1738   | 2 | 1068.01 | -4.92  |
| O75083 WDR1_HUMAN WD repeat-containing protein 1 | 27 | Phosphoryl STY(12)    | NIDNPALADIYTEHAHQVVVAK                   | 43  | 22 | 3  | 22.66 | b6b11b12                              | 2498.17 | 71.615  | 3670   | 3 | 833.39  | -11.53 |
| O75083 WDR1_HUMAN WD repeat-containing protein 1 | 28 | Phosphoryl STY(12)    | VVTVFSVADGYSENNVFYGHHA<br>K              | 511 | 23 | 3  | 12.44 | b10b13_H3PO4 b13y9                    | 2620.18 | 68.549  | 1786   | 2 | 1310.59 | 1.40   |
| P08107 HSP71_HUMAN Heat shock 70 kDa protein 1   | 1  |                       | SINPDEAVAYGAAVQAAILMGDK                  | 361 | 23 | 5  | 18.85 | b3b5b8*b8y23                          | 2304.13 | 68.998  | 70011  | 4 | 576.79  | -12.61 |
| P08107 HSP71_HUMAN Heat shock 70 kDa protein 1   | 2  |                       | VEIANDQGNR                               | 25  | 11 | 12 | 97.68 | b2b3b4y4*y4y6y7y8y9*y9y10y11          | 1228.63 | 35.212  | 65264  | 2 | 614.82  | 0.10   |
| P08107 HSP71_HUMAN Heat shock 70 kDa protein 1   | 3  |                       | TTPSYVAFTDTER                            | 36  | 13 | 9  | 92.82 | b1y3y4y5y6y7y9y11y13                  | 1487.70 | 54.288  | 61045  | 2 | 744.35  | 0.74   |
| P08107 HSP71_HUMAN Heat shock 70 kDa protein 1   | 4  |                       | LLQDFENGR                                | 348 | 9  | 3  | 29.25 | b3b5y6                                | 1109.57 | 71.100  | 12398  | 2 | 555.29  | -1.98  |
| P08107 HSP71_HUMAN Heat shock 70 kDa protein 1   | 5  |                       | STLEPVEK                                 | 311 | 8  | 6  | 60.31 | b4b5*b5b6b7y5                         | 902.47  | 54.448  | 6782   | 2 | 451.74  | -19.21 |
| P08107 HSP71_HUMAN Heat shock 70 kDa protein 1   | 6  | Carbamidomethyl+C(14) | AAAIGIDLGTTYSCVGVFQH GK                  | 3   | 22 | 4  | 28.63 | y5y9y11y13                            | 2265.11 | 76.187  | 6537   | 3 | 755.71  | -12.39 |
| P08107 HSP71_HUMAN Heat shock 70 kDa protein 1   | 7  |                       | NQVALNPQNTVFD AK                         | 56  | 15 | 3  | 17.17 | b6y4y7                                | 1658.87 | 68.871  | 4212   | 2 | 829.94  | 13.69  |
| P08107 HSP71_HUMAN Heat shock 70 kDa protein 1   | 8  | Carbamidomethyl+C(6)  | ELEQVCNPIISGLYQGAGGPGGG<br>FGAQQPK       | 597 | 31 | 3  | 11.01 | b13y10y18                             | 3055.50 | 82.575  | 3592   | 3 | 1019.17 | 1.12   |
| P08107 HSP71_HUMAN Heat shock 70 kDa protein 1   | 9  |                       | ATAGDTHLGGEDFDNR                         | 220 | 16 | 3  | 23.94 | b3b10b12                              | 1675.76 | 35.665  | 1517   | 2 | 838.38  | 16.10  |

|                                                     |    |                                              |                               |     |    |    |       |                                        |         |         |        |   |         |        |
|-----------------------------------------------------|----|----------------------------------------------|-------------------------------|-----|----|----|-------|----------------------------------------|---------|---------|--------|---|---------|--------|
| P08107 HSP71_HUMAN Heat shock 70 kDa protein 1      | 10 | Carbamidomethyl+C(17)                        | MAKAAAIGIDLGTTYSCVGVFQHGK     | 0   | 25 | 7  | 21.28 | b3b5y9*y9y11*y11y13                    | 2595.31 | 100.168 | 214462 | 3 | 865.77  | -0.28  |
| P08107 HSP71_HUMAN Heat shock 70 kDa protein 1      | 11 |                                              | LLQDFFNDRDLNK                 | 348 | 13 | 4  | 28.14 | b8b11y6y11                             | 1579.84 | 61.029  | 45755  | 3 | 527.28  | 10.97  |
| P08107 HSP71_HUMAN Heat shock 70 kDa protein 1      | 12 |                                              | AFYPEEISSMVLTKMK              | 112 | 16 | 5  | 26.94 | b7b8b13y13*y13                         | 1873.95 | 99.058  | 12269  | 2 | 937.48  | 1.95   |
| P08107 HSP71_HUMAN Heat shock 70 kDa protein 1      | 13 |                                              | DAGVIAGLNVLRIINEPTAAAIAYG LDR | 159 | 28 | 3  | 21.54 | b3b4y13                                | 2866.55 | 74.386  | 8235   | 3 | 956.19  | -10.90 |
| P08107 HSP71_HUMAN Heat shock 70 kDa protein 1      | 14 |                                              | NALESYAFNMKSAVEDEGLK          | 539 | 20 | 3  | 20.42 | y6y8y17                                | 2216.05 | 114.745 | 2250   | 2 | 1108.53 | -1.32  |
| P08107 HSP71_HUMAN Heat shock 70 kDa protein 1      | 15 | Carbamidomethyl+C(14)<br>;Phosphoryl STY(11) | AAAIGIDLGTTYSCVGVFQHGK        | 3   | 22 | 5  | 19.74 | b12y4y9y11*y11                         | 2345.09 | 136.333 | 1734   | 2 | 1173.05 | -2.19  |
| P08107 HSP71_HUMAN Heat shock 70 kDa protein 1      | 16 | Oxidation+M()                                | NALESYAFNMK                   | 539 | 11 | 4  | 26.17 | b4*b4y7y8                              | 1303.59 | 26.109  | 3731   | 2 | 652.30  | -10.02 |
| P11021 GRP78_HUMAN 78 kDa glucose-regulated protein | 1  |                                              | VEIANDQGNR                    | 49  | 11 | 12 | 97.68 | b2b3b4y4*y4y6y7y8y9*y9y10y11           | 1228.63 | 35.212  | 65264  | 2 | 614.82  | 0.10   |
| P11021 GRP78_HUMAN 78 kDa glucose-regulated protein | 2  |                                              | NQLTSNPENTVFDKAK              | 81  | 15 | 4  | 17.17 | b7b11y2y11                             | 1677.80 | 53.769  | 17884  | 2 | 839.40  | -6.33  |
| P11021 GRP78_HUMAN 78 kDa glucose-regulated protein | 3  |                                              | SQIFSTASDNQPTVTIK             | 447 | 17 | 7  | 34.32 | b2*b2b3b4b7b16y12                      | 1836.94 | 57.158  | 17733  | 2 | 918.98  | 5.25   |
| P11021 GRP78_HUMAN 78 kDa glucose-regulated protein | 4  |                                              | EFFNGKEPSR                    | 376 | 10 | 4  | 25.72 | b6b9*b9y6                              | 1210.58 | 36.624  | 5874   | 2 | 605.80  | -0.91  |
| P11021 GRP78_HUMAN 78 kDa glucose-regulated protein | 5  |                                              | LYGSAGPPPTGEEDTAEK            | 633 | 18 | 3  | 14.75 | b6y4y11                                | 1818.86 | 40.747  | 4006   | 3 | 606.96  | 10.07  |
| P11021 GRP78_HUMAN 78 kDa glucose-regulated protein | 6  |                                              | ALSSQHQAR                     | 297 | 9  | 4  | 29.25 | b3b6y6*y6                              | 997.51  | 74.419  | 46227  | 2 | 499.26  | -12.24 |
| P11021 GRP78_HUMAN 78 kDa glucose-regulated protein | 7  |                                              | ITPSYVAFTPEGER                | 60  | 14 | 5  | 26.09 | b10b13y8y11*y11                        | 1566.79 | 59.944  | 24274  | 2 | 783.90  | 3.74   |
| P11021 GRP78_HUMAN 78 kDa glucose-regulated protein | 8  |                                              | IEWLESHQDADIEDFK              | 601 | 16 | 8  | 42.64 | b7*b7b10b11b13*b13y4y8                 | 1974.91 | 68.666  | 21760  | 3 | 658.97  | -0.37  |
| P11021 GRP78_HUMAN 78 kDa glucose-regulated protein | 9  |                                              | VYGERPLTK                     | 464 | 10 | 6  | 39.43 | b4*b4b6*b6y7y8                         | 1191.62 | 27.706  | 18362  | 3 | 397.88  | -10.86 |
| P11021 GRP78_HUMAN 78 kDa glucose-regulated protein | 10 |                                              | EVEK                          | 290 | 4  | 1  | 12.3  | y3                                     | 504.27  | 23.536  | 14997  | 1 | 504.27  | 2.54   |
| P11021 GRP78_HUMAN 78 kDa glucose-regulated protein | 11 |                                              | ITITNDQNR                     | 523 | 9  | 4  | 29.25 | b7y7y8*y8                              | 1074.55 | 27.254  | 11827  | 2 | 537.78  | -1.25  |
| P11021 GRP78_HUMAN 78 kDa glucose-regulated protein | 12 |                                              | AVEEK                         | 596 | 5  | 3  | 25.49 | b3y4*y4                                | 575.31  | 23.529  | 6791   | 1 | 575.31  | 6.37   |
| P11021 GRP78_HUMAN 78 kDa glucose-regulated protein | 13 |                                              | FEELNMDLFR                    | 326 | 10 | 3  | 25.72 | b8y6y9                                 | 1313.65 | 39.343  | 6123   | 2 | 657.33  | 21.47  |
| P11021 GRP78_HUMAN 78 kDa glucose-regulated protein | 14 |                                              | SDIDEIVLVGGSTR                | 353 | 14 | 5  | 50.3  | b8b9y5y6y7                             | 1460.76 | 62.074  | 6011   | 2 | 730.89  | 3.68   |
| P11021 GRP78_HUMAN 78 kDa glucose-regulated protein | 15 |                                              | LSSSEDK                       | 585 | 6  | 3  | 25.94 | b4*b4y3                                | 678.34  | 41.803  | 5267   | 1 | 678.34  | 9.99   |
| P11021 GRP78_HUMAN 78 kDa glucose-regulated protein | 16 |                                              | IDTR                          | 558 | 4  | 1  | 12.3  | y3                                     | 504.28  | 70.372  | 5056   | 1 | 504.28  | -2.84  |
| P11021 GRP78_HUMAN 78 kDa glucose-regulated protein | 17 | Carbamidomethyl+C(17)                        | EDVGTVVIGIDLGTTYSCVGVFK       | 24  | 22 | 3  | 12.79 | b5y10y13                               | 2316.17 | 61.926  | 3113   | 3 | 772.73  | 10.54  |
| P11021 GRP78_HUMAN 78 kDa glucose-regulated protein | 18 |                                              | VEIANDQGNRITPSYVAFTPEGER      | 49  | 25 | 4  | 26.21 | y3y7y15y18                             | 2776.38 | 90.623  | 215471 | 3 | 926.13  | -3.25  |
| P11021 GRP78_HUMAN 78 kDa glucose-regulated protein | 19 |                                              | AKFEELNMDLFR                  | 324 | 12 | 4  | 30.61 | b3b8y4y10                              | 1512.75 | 80.359  | 33810  | 2 | 756.88  | -0.40  |
| P11021 GRP78_HUMAN 78 kDa glucose-regulated protein | 20 |                                              | IEWLESHQDADIEDFKAK            | 601 | 18 | 12 | 47.6  | b6b13*b13*b13y6*y6y7y12*y12*y12y13*y13 | 2174.04 | 62.685  | 10253  | 4 | 544.27  | 1.91   |
| P11021 GRP78_HUMAN 78 kDa glucose-regulated protein | 21 |                                              | VTAEDKGTGNK                   | 510 | 11 | 5  | 35.11 | b4b7b8y7*y7                            | 1119.56 | 46.985  | 9161   | 2 | 560.28  | -4.80  |

|                                                     |    |                       |                       |     |    |    |       |                                    |         |         |        |   |         |        |
|-----------------------------------------------------|----|-----------------------|-----------------------|-----|----|----|-------|------------------------------------|---------|---------|--------|---|---------|--------|
| P11021 GRP78_HUMAN 78 kDa glucose-regulated protein | 22 |                       | NQLTSNPENTVFDAGR      | 81  | 16 | 5  | 26.27 | b12y4y9*y9y14                      | 1833.88 | 79.398  | 7143   | 1 | 1833.88 | -13.85 |
| P11021 GRP78_HUMAN 78 kDa glucose-regulated protein | 23 |                       | AVEEKIEWLESHQDADIEDFK | 596 | 21 | 7  | 29.55 | b4y5y6y10*y10y13*y13               | 2531.17 | 87.670  | 4628   | 3 | 844.39  | -9.36  |
| P11021 GRP78_HUMAN 78 kDa glucose-regulated protein | 24 |                       | IEIESFYEGEDFSETLTRAK  | 306 | 20 | 6  | 26.32 | b3*b3b5b7y8y12                     | 2364.09 | 108.944 | 3348   | 2 | 1182.55 | -13.94 |
| P11021 GRP78_HUMAN 78 kDa glucose-regulated protein | 25 |                       | MVNDAEKFAEEDK         | 540 | 13 | 7  | 19.58 | b8*b8*b8b10*b10y7*y7               | 1525.68 | 27.148  | 2587   | 3 | 509.23  | 0.08   |
| P11021 GRP78_HUMAN 78 kDa glucose-regulated protein | 26 | Phosphoryl STY(5)     | SQIFSTASDNQPTVTIK     | 447 | 17 | 3  | 15.44 | b3y14y16                           | 1916.88 | 89.175  | 8178   | 3 | 639.63  | -3.50  |
| P11021 GRP78_HUMAN 78 kDa glucose-regulated protein | 27 | Phosphoryl STY(5)     | ITPSYVAFTPEGER        | 60  | 14 | 4  | 30.05 | b4y3y6y10_H3PO4 y10                | 1646.76 | 44.881  | 3189   | 2 | 823.88  | 12.60  |
| P11021 GRP78_HUMAN 78 kDa glucose-regulated protein | 28 | Oxidation+M(11)       | DAGTIAGLNVMR          | 185 | 12 | 3  | 21.17 | b4y4y11                            | 1233.62 | 59.233  | 5407   | 2 | 617.31  | -2.77  |
| P35609 ACTN2_HUMAN Alpha-actinin-2                  | 1  | Carbamidomethyl+C(7)  | EGLLLWCQR             | 154 | 9  | 5  | 43.75 | b8y3y5y6y9                         | 1174.60 | 75.268  | 47346  | 2 | 587.80  | -1.87  |
| P35609 ACTN2_HUMAN Alpha-actinin-2                  | 2  |                       | HEAFESDLAAHQDR        | 443 | 14 | 13 | 76.47 | b2b3*b3b5b8b10y4y9*y9y10*y10y12y14 | 1625.72 | 35.568  | 28234  | 3 | 542.58  | -5.03  |
| P35609 ACTN2_HUMAN Alpha-actinin-2                  | 3  |                       | ASTHETWAYGK           | 409 | 11 | 10 | 50.87 | b1b5*b5b6b7b9b11y2y6y11            | 1250.58 | 29.523  | 8701   | 2 | 625.79  | -1.85  |
| P35609 ACTN2_HUMAN Alpha-actinin-2                  | 4  |                       | LMLLLEVISGER          | 71  | 12 | 3  | 28.38 | y3y4y6                             | 1372.78 | 105.908 | 4821   | 2 | 686.90  | -1.69  |
| P35609 ACTN2_HUMAN Alpha-actinin-2                  | 5  |                       | GYEEWLLNEIR           | 383 | 11 | 3  | 23.16 | b7b10y3                            | 1421.70 | 86.438  | 4401   | 1 | 1421.70 | -5.75  |
| P35609 ACTN2_HUMAN Alpha-actinin-2                  | 6  |                       | NGLMDHEDFR            | 769 | 10 | 7  | 25.72 | b1*b1b2b3b5y3*y3                   | 1233.53 | 21.584  | 2059   | 2 | 617.27  | 1.98   |
| P35609 ACTN2_HUMAN Alpha-actinin-2                  | 7  |                       | ASFNFHDFRR            | 759 | 9  | 3  | 22.52 | b3b8y8*                            | 1149.55 | 44.114  | 1946   | 2 | 575.28  | -5.84  |
| P35609 ACTN2_HUMAN Alpha-actinin-2                  | 8  |                       | DYESASLTEVR           | 427 | 11 | 5  | 53.88 | b10y5y6y8y9                        | 1269.62 | 36.425  | 68834  | 3 | 423.88  | 20.29  |
| P35609 ACTN2_HUMAN Alpha-actinin-2                  | 9  |                       | MLDAEDIVNTPKPDER      | 227 | 16 | 5  | 26.27 | b5y3y5*y5y7                        | 1842.89 | 77.717  | 10433  | 3 | 614.97  | -1.52  |
| P35609 ACTN2_HUMAN Alpha-actinin-2                  | 10 |                       | NVNQNFHTSWK           | 169 | 12 | 5  | 34.59 | b9b10*b10y6y9                      | 1487.76 | 44.871  | 9956   | 3 | 496.59  | 11.16  |
| P35609 ACTN2_HUMAN Alpha-actinin-2                  | 11 | Carbamidomethyl+C(2)  | ICDQWDR               | 485 | 7  | 5  | 36.13 | b4*b4*b4y4y5                       | 992.43  | 27.166  | 9543   | 2 | 496.72  | 3.94   |
| P35609 ACTN2_HUMAN Alpha-actinin-2                  | 12 |                       | ISSSNPYSTVMTDELRL     | 592 | 16 | 8  | 55.86 | b5*b5b6b7b8y8y10*y10               | 1799.83 | 62.630  | 8769   | 2 | 900.42  | -12.55 |
| P35609 ACTN2_HUMAN Alpha-actinin-2                  | 13 |                       | LEHLAEK               | 398 | 7  | 4  | 39.14 | b3b5y3*y3                          | 839.45  | 44.883  | 6867   | 2 | 420.23  | -13.09 |
| P35609 ACTN2_HUMAN Alpha-actinin-2                  | 14 | Carbamidomethyl+C(2)  | ACLISMGYDLGAEAFAR     | 779 | 17 | 3  | 15.44 | b11b13y6                           | 1902.85 | 83.208  | 6659   | 3 | 634.96  | -9.24  |
| P35609 ACTN2_HUMAN Alpha-actinin-2                  | 15 |                       | LEDLR                 | 319 | 5  | 1  | 12.75 | b3                                 | 679.34  | 65.007  | 3405   | 1 | 679.34  | 5.66   |
| P35609 ACTN2_HUMAN Alpha-actinin-2                  | 16 |                       | QYEHNIINYK            | 679 | 10 | 4  | 35.72 | y7y8y9*y9                          | 1321.63 | 136.328 | 3135   | 1 | 1321.63 | -19.95 |
| P35609 ACTN2_HUMAN Alpha-actinin-2                  | 17 |                       | DQSLQEELAR            | 621 | 10 | 4  | 25.72 | b9y7y9*y9                          | 1188.58 | 71.847  | 2932   | 2 | 594.80  | -1.23  |
| P35609 ACTN2_HUMAN Alpha-actinin-2                  | 18 |                       | ATLPEADGER            | 562 | 10 | 9  | 69.69 | b8*b8b9y3y7*y7y8*y8y9              | 1058.53 | 25.347  | 2332   | 3 | 353.51  | 14.76  |
| P35609 ACTN2_HUMAN Alpha-actinin-2                  | 19 | Carbamidomethyl+C(6)  | DGLGLCALIHRHRPDLIDYSK | 181 | 21 | 5  | 17.76 | b4*b4b7y3y10                       | 2449.29 | 55.974  | 103286 | 3 | 817.10  | 5.08   |
| P35609 ACTN2_HUMAN Alpha-actinin-2                  | 20 |                       | ISSSNPYSTVMTDELRTK    | 592 | 18 | 4  | 20.44 | b4b10y7y11                         | 2028.96 | 82.302  | 96494  | 3 | 676.99  | -13.48 |
| P35609 ACTN2_HUMAN Alpha-actinin-2                  | 21 |                       | MVSDIAGAWQRLEQAEK     | 366 | 17 | 3  | 15.44 | b10b13y4                           | 1931.98 | 82.286  | 10271  | 2 | 966.50  | 10.11  |
| P35609 ACTN2_HUMAN Alpha-actinin-2                  | 22 | Carbamidomethyl+C(10) | ELPPDQAQYCIKR         | 852 | 13 | 4  | 27.06 | b5*b5b9b10                         | 1617.78 | 31.108  | 9757   | 4 | 405.20  | -14.11 |

|                                              |    |                                         |                                           |     |    |    |        |                                     |         |         |        |   |         |        |
|----------------------------------------------|----|-----------------------------------------|-------------------------------------------|-----|----|----|--------|-------------------------------------|---------|---------|--------|---|---------|--------|
| P35609 ACTN2_HUMAN Alpha-actinin-2           | 23 |                                         | TPEKTMQAMQK                               | 307 | 11 | 9  | 76.36  | b4b6b9b10*b10y6y7y9*y9              | 1292.63 | 75.336  | 6325   | 2 | 646.82  | -1.42  |
| P35609 ACTN2_HUMAN Alpha-actinin-2           | 24 |                                         | QYEHNIINYKNNIDK                           | 679 | 15 | 3  | 17.17  | b9y5y12                             | 1905.92 | 72.385  | 5861   | 2 | 953.47  | -10.89 |
| P35609 ACTN2_HUMAN Alpha-actinin-2           | 25 |                                         | ATLPEADGERQSIMAIQNEVEK                    | 562 | 22 | 6  | 25.8   | b8b14*b14y5*y5y6                    | 2429.17 | 78.012  | 4152   | 4 | 608.05  | -10.35 |
| P35609 ACTN2_HUMAN Alpha-actinin-2           | 26 |                                         | IANVNKALDYIASK                            | 96  | 14 | 4  | 29.26  | b3b5b6y3                            | 1519.83 | 28.714  | 2438   | 4 | 380.71  | -11.24 |
| P35609 ACTN2_HUMAN Alpha-actinin-2           | 27 |                                         | DQSLQEELARQHANER                          | 621 | 16 | 10 | 65.9   | b5b8b11y5y6y7*y7*y7y8*y8            | 1923.94 | 110.548 | 1611   | 2 | 962.48  | 8.95   |
| P35609 ACTN2_HUMAN Alpha-actinin-2           | 28 | Phosphoryl STY(12)                      | IMTLVDPNGQGTVTFQSFIDFMTR                  | 796 | 24 | 8  | 30.92  | b10*b10b13b15b16*b16y6y11_H3PO4 y11 | 2798.27 | 76.477  | 27207  | 3 | 933.43  | -4.54  |
| P35609 ACTN2_HUMAN Alpha-actinin-2           | 29 | Phosphoryl STY(7)                       | ALDYIASK                                  | 102 | 8  | 4  | 39.59  | b4b5*b5b6                           | 960.42  | 40.766  | 9136   | 3 | 320.81  | -10.68 |
| P35609 ACTN2_HUMAN Alpha-actinin-2           | 30 | Carbamidomethyl+C(10);Phosphoryl STY(9) | ELPPDQAQYCIKR                             | 852 | 13 | 6  | 51.31  | b5b6b7b8*b8y6                       | 1697.76 | 35.562  | 3517   | 3 | 566.59  | -2.37  |
| P35609 ACTN2_HUMAN Alpha-actinin-2           | 31 | Phosphoryl STY(13)                      | EQILLQKDYESASLTEVR                        | 420 | 18 | 3  | 14.75  | b3b11y4                             | 2202.08 | 57.817  | 2847   | 2 | 1101.55 | 11.53  |
| P35609 ACTN2_HUMAN Alpha-actinin-2           | 32 | Oxidation+M(19)                         | NQIEPGVQYNYVYDEDEYMIQEE<br>EWDRLDLLDPAWEK | 1   | 37 | 6  | 20.93  | b5*b5b6b9*b9y7                      | 4651.14 | 119.585 | 21049  | 4 | 1163.54 | 13.12  |
| P35609 ACTN2_HUMAN Alpha-actinin-2           | 33 | Oxidation+M(22)                         | IMTLVDPNGQGTVTFQSFIDFMTR                  | 796 | 24 | 4  | 15.83  | b9b11y3y6                           | 2734.34 | 107.126 | 1643   | 2 | 1367.67 | 7.23   |
| P35609 ACTN2_HUMAN Alpha-actinin-2           | 34 |                                         | LMDHEDFR                                  | 771 | 8  | 1  | 8      | b5                                  | 1062.46 | 21.518  | 1559   | 2 | 531.73  | -8.96  |
| P35609 ACTN2_HUMAN Alpha-actinin-2           | 35 |                                         | STHETWAYGK                                | 410 | 10 | 0  | 2.7    |                                     | 1179.54 | 29.567  | 1500   | 3 | 393.85  | 1.35   |
| Q9BUF5 TBB6_HUMAN Tubulin beta-6 chain       | 1  |                                         | LAVNMVPPFR                                | 252 | 10 | 14 | 109.18 | b2b3b5*b5y1y3y4y5y6y7y8y9*y9y10     | 1143.63 | 71.952  | 238985 | 2 | 572.32  | -5.12  |
| Q9BUF5 TBB6_HUMAN Tubulin beta-6 chain       | 2  |                                         | LHFFMPGFAPLTSR                            | 262 | 14 | 3  | 18.27  | b12y3y12                            | 1620.83 | 112.804 | 1500   | 2 | 810.92  | -2.64  |
| Q9BUF5 TBB6_HUMAN Tubulin beta-6 chain       | 3  |                                         | AALVDLEPGTMDSVR                           | 62  | 15 | 4  | 35.27  | y6y8y13y14                          | 1573.76 | 86.836  | 17962  | 2 | 787.39  | -16.06 |
| Q9BUF5 TBB6_HUMAN Tubulin beta-6 chain       | 4  |                                         | ISEQFSAMFR                                | 380 | 10 | 3  | 25.72  | b6y5y7                              | 1215.60 | 59.150  | 4925   | 2 | 608.30  | 13.16  |
| Q9BUF5 TBB6_HUMAN Tubulin beta-6 chain       | 5  |                                         | SGPFGQLFRPDNFIFGQGTAGANN<br>WAK           | 77  | 26 | 8  | 43.95  | b4b5b6*b6b14y5y13y17                | 2826.34 | 87.556  | 4425   | 4 | 707.34  | -12.87 |
| Q9BUF5 TBB6_HUMAN Tubulin beta-6 chain       | 6  |                                         | ALTVPELTQQMFDAR                           | 282 | 15 | 4  | 25.25  | y3y4*y4y7                           | 1719.85 | 85.028  | 4388   | 3 | 573.96  | -11.21 |
| Q9BUF5 TBB6_HUMAN Tubulin beta-6 chain       | 7  | Carbamidomethyl+C(4)                    | VAVCDIPPR                                 | 350 | 9  | 4  | 43.75  | b3b7b8y7                            | 1026.55 | 62.658  | 3704   | 2 | 513.78  | 6.66   |
| Q9BUF5 TBB6_HUMAN Tubulin beta-6 chain       | 8  |                                         | YVPRAALVDLEPGTMDSVR                       | 58  | 19 | 3  | 14.15  | b3y9y11                             | 2089.10 | 79.458  | 2817   | 2 | 1045.05 | 9.82   |
| Q9BUF5 TBB6_HUMAN Tubulin beta-6 chain       | 9  |                                         | EEFPDRIMNTFSVMPSPK                        | 156 | 18 | 7  | 35.28  | b10*b10*b10b11b12y13*y13            | 2125.01 | 67.370  | 1695   | 2 | 1063.01 | 0.34   |
| Q9BUF5 TBB6_HUMAN Tubulin beta-6 chain       | 10 | Carbamidomethyl+C(12);Oxidation+M(1)    | MREIVHIQAGQCGNQIGTK                       | 0   | 19 | 3  | 14.15  | b4b12y11                            | 2156.05 | 75.400  | 7475   | 4 | 539.77  | -8.95  |
| Q9BUF5 TBB6_HUMAN Tubulin beta-6 chain       | 11 | Oxidation+M(11)                         | ALTVPELTQQMFDAR                           | 282 | 15 | 5  | 17.17  | b4*b4b14y14*y14                     | 1735.85 | 136.612 | 2883   | 1 | 1735.85 | -13.22 |
| Q9BUF5 TBB6_HUMAN Tubulin beta-6 chain       | 12 | Oxidation+M(11)                         | AALVDLEPGTMDSVR                           | 62  | 15 | 3  | 17.17  | b3b11y5                             | 1589.78 | 136.541 | 2683   | 1 | 1589.78 | -1.92  |
| P31946 1433B_HUMAN 14-3-3 protein beta/alpha | 1  |                                         | NLLSVAYK                                  | 43  | 8  | 7  | 34.82  | b1b4*b4y2y3y6y8                     | 907.52  | 57.340  | 117498 | 2 | 454.26  | -3.63  |
| P31946 1433B_HUMAN 14-3-3 protein beta/alpha | 2  |                                         | VISSIEQK                                  | 62  | 8  | 4  | 39.59  | y4y6y7y8                            | 903.51  | 28.272  | 28083  | 2 | 452.26  | -5.94  |
| P31946 1433B_HUMAN 14-3-3 protein beta/alpha | 3  |                                         | TAFDEAIAELDTLNESYKDSLIMQLLR               | 195 | 29 | 10 | 13.71  | b1b2b6b8*b8y1y2y3y5y29              | 3329.64 | 130.547 | 22750  | 3 | 1110.55 | -1.69  |

|                                              |    |                                                                               |                             |     |    |    |       |                               |         |         |        |   |         |        |
|----------------------------------------------|----|-------------------------------------------------------------------------------|-----------------------------|-----|----|----|-------|-------------------------------|---------|---------|--------|---|---------|--------|
| P31946 1433B_HUMAN 14-3-3 protein beta/alpha | 4  |                                                                               | KEMQPTHPIR                  | 159 | 10 | 9  | 52.18 | b2*b2b3*b3b4y2y3y6y7          | 1236.64 | 19.688  | 3042   | 3 | 412.88  | -13.33 |
| P31946 1433B_HUMAN 14-3-3 protein beta/alpha | 5  | Carbamidomethyl+C(9)                                                          | IEAELQDNCNDVLELLDK          | 87  | 18 | 4  | 31.27 | y5y9y13y14                    | 2130.07 | 93.225  | 35684  | 3 | 710.70  | 4.81   |
| P31946 1433B_HUMAN 14-3-3 protein beta/alpha | 6  |                                                                               | YLSEVASGDNK                 | 129 | 11 | 5  | 26.17 | b5°b5y5y6*y6                  | 1182.59 | 70.986  | 22495  | 2 | 591.80  | 20.65  |
| P31946 1433B_HUMAN 14-3-3 protein beta/alpha | 7  |                                                                               | QTTVSNSQQAYQEAFEISK         | 140 | 19 | 4  | 14.15 | b10b12*b12y13                 | 2159.06 | 52.043  | 12555  | 3 | 720.36  | 18.32  |
| P31946 1433B_HUMAN 14-3-3 protein beta/alpha | 8  |                                                                               | TAFDEAIAELDTLNEESYK         | 195 | 19 | 11 | 54.37 | b3b8b9b14*b14y4y5y9°y9y13*y13 | 2159.01 | 107.235 | 1707   | 3 | 720.34  | 2.49   |
| P31946 1433B_HUMAN 14-3-3 protein beta/alpha | 9  |                                                                               | GDYFRYLSEVASGDNK            | 124 | 16 | 3  | 16.24 | b4b9y5                        | 1820.86 | 73.744  | 8956   | 4 | 455.97  | 7.24   |
| P31946 1433B_HUMAN 14-3-3 protein beta/alpha | 10 |                                                                               | AVTEQGHELNSNEERNLLSVAYK     | 29  | 22 | 3  | 12.79 | b7b15y3                       | 2487.21 | 71.900  | 3413   | 3 | 829.74  | -14.13 |
| P31946 1433B_HUMAN 14-3-3 protein beta/alpha | 11 | Phosphoryl STY(7)                                                             | YLSEVASGDNK                 | 129 | 11 | 3  | 23.16 | b6y6_H3PO4 y6y8_HPO3y8        | 1262.51 | 27.097  | 3552   | 2 | 631.76  | -9.48  |
| P00558 PGK1_HUMAN Phosphoglycerate kinase 1  | 1  |                                                                               | ALESERPFLAILGGAK            | 199 | 17 | 4  | 15.44 | b9b11y15y17                   | 1768.98 | 83.075  | 48735  | 3 | 590.33  | -10.07 |
| P00558 PGK1_HUMAN Phosphoglycerate kinase 1  | 2  |                                                                               | LGDVYVNDAFGTAHR             | 156 | 15 | 8  | 66.4  | b3b4y3y5y6y11y14y15           | 1634.79 | 57.193  | 43320  | 3 | 545.60  | -3.96  |
| P00558 PGK1_HUMAN Phosphoglycerate kinase 1  | 3  | Carbamidomethyl+C(2)                                                          | ACANPAAGSVILLENLR           | 106 | 17 | 7  | 32.18 | b2b3b12y3y4y13y17             | 1768.94 | 82.588  | 40467  | 2 | 884.97  | -0.90  |
| P00558 PGK1_HUMAN Phosphoglycerate kinase 1  | 4  | Carbamidomethyl+C(19)                                                         | TGQATVASGIPAGWMGLDCGPES SKK | 297 | 26 | 8  | 30.72 | b1b5b15b17y14y15°y15y20       | 2605.25 | 70.328  | 26768  | 3 | 869.09  | 3.37   |
| P00558 PGK1_HUMAN Phosphoglycerate kinase 1  | 5  |                                                                               | FHVVEEGK                    | 123 | 8  | 7  | 47.56 | b6y2y4°y4y5y6y8               | 974.46  | 24.364  | 8749   | 2 | 487.73  | 4.32   |
| P00558 PGK1_HUMAN Phosphoglycerate kinase 1  | 6  |                                                                               | SVVLMSHLGRPDGVPMPDK         | 56  | 19 | 8  | 47.36 | b6b14y3y4°y4y6y8y10           | 2035.01 | 71.029  | 198430 | 3 | 679.01  | -19.19 |
| P00558 PGK1_HUMAN Phosphoglycerate kinase 1  | 7  | Carbamidomethyl+C(2)                                                          | DCVGPEVEK                   | 97  | 9  | 4  | 43.75 | b4y4y5y7                      | 1032.48 | 27.760  | 15171  | 2 | 516.74  | 8.87   |
| P00558 PGK1_HUMAN Phosphoglycerate kinase 1  | 8  |                                                                               | VSHVSTGGGASLELLEGGK         | 388 | 18 | 3  | 21.91 | b6b11b13                      | 1740.91 | 68.105  | 11982  | 3 | 580.98  | -1.12  |
| P00558 PGK1_HUMAN Phosphoglycerate kinase 1  | 9  | Carbamidomethyl+C(2);<br>Carbamidomethyl+C(14);<br>Carbamidomethyl+C(15)<br>) | GCITIIGGGDTATCCAK           | 365 | 17 | 3  | 15.44 | b10y3y11                      | 1754.81 | 50.960  | 10925  | 2 | 877.91  | 11.62  |
| P00558 PGK1_HUMAN Phosphoglycerate kinase 1  | 10 |                                                                               | AHSSMVGVNLPQK               | 171 | 13 | 9  | 61.31 | b4°b4b6°b6b9°b9b11b12°b12     | 1367.68 | 86.203  | 10105  | 2 | 684.34  | -21.60 |
| P00558 PGK1_HUMAN Phosphoglycerate kinase 1  | 11 |                                                                               | VLNNMEIGTSLFDEEGAK          | 246 | 18 | 3  | 14.75 | b5b15y9                       | 1966.98 | 99.374  | 8976   | 3 | 656.33  | 20.79  |
| P00558 PGK1_HUMAN Phosphoglycerate kinase 1  | 12 | Carbamidomethyl+C(19)                                                         | TGQATVASGIPAGWMGLDCGPES SK  | 297 | 25 | 5  | 25.95 | b6b9b17b19y9                  | 2477.18 | 89.012  | 4187   | 3 | 826.40  | 15.08  |
| P00558 PGK1_HUMAN Phosphoglycerate kinase 1  | 13 |                                                                               | VNEMIIGGGMAFTFLK            | 230 | 16 | 4  | 22.87 | b4b7y8y10                     | 1727.86 | 111.152 | 3175   | 2 | 864.43  | -15.33 |
| P00558 PGK1_HUMAN Phosphoglycerate kinase 1  | 14 |                                                                               | ALMDEVVK                    | 353 | 8  | 8  | 62.07 | b3b4°b4b7°b7y6y7°y7           | 904.47  | 27.098  | 2826   | 1 | 904.47  | -17.07 |
| P00558 PGK1_HUMAN Phosphoglycerate kinase 1  | 15 |                                                                               | QIVWNGPVGVEWEAFAR           | 332 | 18 | 6  | 14.75 | b7°b7b9°b9y5°y5               | 2105.09 | 118.205 | 1680   | 2 | 1053.05 | 11.83  |
| P00558 PGK1_HUMAN Phosphoglycerate kinase 1  | 16 |                                                                               | NNQITNNQR                   | 30  | 9  | 3  | 37.03 | b4b5b8                        | 1101.53 | 64.926  | 1553   | 1 | 1101.53 | -8.20  |
| P00558 PGK1_HUMAN Phosphoglycerate kinase 1  | 17 |                                                                               | ITLPVDFVTADKFDENAK          | 279 | 18 | 7  | 56.09 | y4y10y12y13°y13y15y16         | 2023.02 | 79.524  | 56463  | 3 | 675.01  | -8.51  |
| P00558 PGK1_HUMAN Phosphoglycerate kinase 1  | 18 | Carbamidomethyl+C(19)                                                         | TGQATVASGIPAGWMGLDCGPES SKK | 297 | 26 | 3  | 22.34 | b10b11b14                     | 2605.25 | 106.674 | 3557   | 3 | 869.09  | 5.44   |
| P00558 PGK1_HUMAN Phosphoglycerate kinase 1  | 19 | Phosphoryl STY(13)                                                            | VNEMIIGGGMAFTFLK            | 230 | 16 | 6  | 39.43 | b11b13°b13b15y10y11           | 1807.82 | 46.561  | 11788  | 3 | 603.28  | -9.86  |
| P00558 PGK1_HUMAN Phosphoglycerate kinase 1  | 20 | Oxidation+M(16)                                                               | SVVLMSHLGRPDGVPMPDK         | 56  | 19 | 6  | 40.36 | b6b7b9y3y4y17                 | 2051.03 | 46.029  | 14399  | 3 | 684.35  | -3.09  |



|                                             |    |                      |                         |      |    |    |        |                                                              |         |         |        |   |         |        |
|---------------------------------------------|----|----------------------|-------------------------|------|----|----|--------|--------------------------------------------------------------|---------|---------|--------|---|---------|--------|
| P00558 PGK1_HUMAN Phosphoglycerate kinase 1 | 21 | Oxidation+M(10)      | VNEMIIGGGMAFTFLK        | 230  | 16 | 3  | 23.94  | b9b11b13                                                     | 1743.88 | 79.095  | 4754   | 2 | 872.45  | 1.54   |
| P35580 MYH10_HUMAN Myosin-10                | 1  |                      | TQLEELEDELQATEDAK       | 1545 | 17 | 23 | 178.33 | b2*b2b4b5b9b11*b11b13b14y2y3y4y5y6y8y9*y9y11y12y13*y13y15y17 | 1961.93 | 78.129  | 173219 | 2 | 981.47  | 5.48   |
| P35580 MYH10_HUMAN Myosin-10                | 2  |                      | LDPHLVLDQLR             | 689  | 11 | 8  | 79.18  | y3y4*y4y5y6y7y9y11                                           | 1318.74 | 70.486  | 163228 | 2 | 659.88  | -3.15  |
| P35580 MYH10_HUMAN Myosin-10                | 3  |                      | NTNPNFVR                | 669  | 8  | 12 | 31.81  | b1*b1b2*b2b5*b5y2y5*y5y6*y6y8                                | 961.48  | 31.100  | 115220 | 2 | 481.25  | -0.06  |
| P35580 MYH10_HUMAN Myosin-10                | 4  | Carbamidomethyl+C(9) | VEDMAELTCLNEASVLHNLK    | 86   | 20 | 8  | 35.44  | b3b5y2y4y5y10y13y20                                          | 2286.10 | 79.023  | 99109  | 3 | 762.70  | -5.23  |
| P35580 MYH10_HUMAN Myosin-10                | 5  | Carbamidomethyl+C(4) | ADFCIIHYAGK             | 572  | 11 | 10 | 78.91  | b3b7y1y2y3y4y5y7y8y11                                        | 1294.62 | 58.016  | 86162  | 2 | 647.81  | -2.45  |
| P35580 MYH10_HUMAN Myosin-10                | 6  | Carbamidomethyl+C(1) | CNGVLEGIR               | 700  | 9  | 10 | 59.51  | b1b2*b2b4y3y4y5y7y9*y9                                       | 1017.51 | 47.905  | 75078  | 2 | 509.26  | -1.50  |
| P35580 MYH10_HUMAN Myosin-10                | 7  |                      | AGVLAHLEEER             | 771  | 11 | 7  | 50.87  | b3y2y4y5y6y8y11                                              | 1223.64 | 48.935  | 70232  | 2 | 612.32  | -0.70  |
| P35580 MYH10_HUMAN Myosin-10                | 8  |                      | FDQLLAEEK               | 1452 | 9  | 8  | 43.24  | b2b6*b6b7y2y5y6y9                                            | 1092.56 | 49.312  | 48659  | 2 | 546.78  | 1.12   |
| P35580 MYH10_HUMAN Myosin-10                | 9  |                      | QVRELEAELEDER           | 1596 | 13 | 4  | 28.83  | y3y7y10y13                                                   | 1615.81 | 81.264  | 7734   | 3 | 539.28  | 13.60  |
| P35580 MYH10_HUMAN Myosin-10                | 10 |                      | LDGETTDLQDQIAELQAQIDELK | 1059 | 23 | 3  | 18.85  | b5b12b14                                                     | 2586.31 | 87.179  | 6314   | 3 | 862.77  | 12.27  |
| P35580 MYH10_HUMAN Myosin-10                | 11 |                      | GGPISFSSSR              | 1930 | 10 | 5  | 35.72  | y2y5y6y7y10                                                  | 994.48  | 27.687  | 4672   | 2 | 497.74  | -13.93 |
| P35580 MYH10_HUMAN Myosin-10                | 12 |                      | IVGLDQVTGMTETAFGSAYK    | 624  | 20 | 3  | 23.05  | y7y13y14                                                     | 2088.01 | 103.970 | 3168   | 2 | 1044.51 | -10.76 |
| P35580 MYH10_HUMAN Myosin-10                | 13 |                      | DAASLESQLQDTQELLQEETR   | 1308 | 21 | 4  | 26.21  | b6b13y5y6                                                    | 2404.14 | 103.612 | 2935   | 3 | 802.05  | -2.44  |
| P35580 MYH10_HUMAN Myosin-10                | 14 |                      | LQQLFNHTMFILEQEEYQR     | 482  | 19 | 4  | 14.15  | b2b8b11y5                                                    | 2467.24 | 102.660 | 2427   | 3 | 823.08  | 11.97  |
| P35580 MYH10_HUMAN Myosin-10                | 15 |                      | ALEEEETK                | 1181 | 7  | 3  | 39.14  | b4y3y6                                                       | 819.40  | 36.454  | 2060   | 2 | 410.21  | -7.23  |
| P35580 MYH10_HUMAN Myosin-10                | 16 |                      | LQQELDDLTVLDLHQR        | 1424 | 16 | 4  | 23.94  | y2y7y11y13                                                   | 1937.96 | 79.262  | 2008   | 4 | 485.25  | 3.59   |
| P35580 MYH10_HUMAN Myosin-10                | 17 |                      | LQAQMKDYQRELEEAR        | 1649 | 16 | 3  | 22.77  | b9y4y5                                                       | 2007.98 | 71.711  | 1981   | 4 | 502.75  | -8.09  |
| P35580 MYH10_HUMAN Myosin-10                | 18 |                      | EVSTLK                  | 1919 | 6  | 4  | 25.94  | b3*b3y3*y3                                                   | 676.39  | 37.487  | 67805  | 1 | 676.39  | 2.26   |
| P35580 MYH10_HUMAN Myosin-10                | 19 |                      | QLEEAEEEEATR            | 1884 | 11 | 8  | 35.11  | b4*b4*b4b5*b5*b5b7y10                                        | 1304.60 | 41.723  | 42180  | 2 | 652.81  | 5.99   |
| P35580 MYH10_HUMAN Myosin-10                | 20 |                      | SLEAEILQLEELASSER       | 1683 | 18 | 3  | 14.75  | b8y4y13                                                      | 2045.03 | 75.919  | 24135  | 3 | 682.35  | -5.97  |
| P35580 MYH10_HUMAN Myosin-10                | 21 |                      | LDAQVQELHAK             | 1256 | 11 | 4  | 59.7   | b4b6b8b10                                                    | 1251.65 | 79.268  | 15242  | 2 | 626.33  | -13.95 |
| P35580 MYH10_HUMAN Myosin-10                | 22 |                      | MEIDLK                  | 1621 | 6  | 3  | 25.94  | b3b4*b4                                                      | 748.38  | 31.162  | 12208  | 1 | 748.38  | -10.03 |
| P35580 MYH10_HUMAN Myosin-10                | 23 |                      | MEEEEILLLEDQNSK         | 982  | 14 | 3  | 23.71  | b7b8y4                                                       | 1690.85 | 71.932  | 12167  | 2 | 845.93  | 17.98  |
| P35580 MYH10_HUMAN Myosin-10                | 24 |                      | ALAYDK                  | 1411 | 6  | 2  | 25.94  | b5y3                                                         | 680.36  | 31.949  | 12130  | 1 | 680.36  | -6.46  |
| P35580 MYH10_HUMAN Myosin-10                | 25 |                      | HQQLLEEK                | 881  | 8  | 4  | 39.59  | b3*b3b6b7                                                    | 1024.54 | 44.855  | 11907  | 2 | 512.77  | -1.91  |
| P35580 MYH10_HUMAN Myosin-10                | 26 |                      | NHEAQIQDMR              | 1188 | 10 | 4  | 25.72  | b5b8*b8y8                                                    | 1241.56 | 30.373  | 9713   | 3 | 414.53  | -4.23  |
| P35580 MYH10_HUMAN Myosin-10                | 27 |                      | LLIK                    | 1592 | 4  | 1  | 12.3   | y3                                                           | 486.37  | 53.478  | 8956   | 1 | 486.37  | 6.21   |

|                              |    |                       |                              |      |    |   |       |                        |         |         |        |   |         |        |
|------------------------------|----|-----------------------|------------------------------|------|----|---|-------|------------------------|---------|---------|--------|---|---------|--------|
| P35580 MYH10_HUMAN Myosin-10 | 28 |                       | VDDDLGTIESLEEAK              | 1379 | 15 | 4 | 17.17 | b14y8°y8y13            | 1633.78 | 72.470  | 8227   | 3 | 545.26  | -0.30  |
| P35580 MYH10_HUMAN Myosin-10 | 29 |                       | AVIYNPATQADWTAK              | 18   | 15 | 6 | 28    | b6*b6b9b11y8°y8        | 1648.84 | 45.989  | 6256   | 2 | 824.92  | 2.37   |
| P35580 MYH10_HUMAN Myosin-10 | 30 |                       | VEGELEEMER                   | 870  | 10 | 8 | 58.2  | b7b9°b9y3°y3y5y8°y8    | 1220.55 | 27.166  | 4445   | 2 | 610.78  | -0.70  |
| P35580 MYH10_HUMAN Myosin-10 | 31 |                       | IGQLEEQLEQEAQ                | 1822 | 13 | 5 | 44.58 | y4y5y7y8°y8            | 1514.74 | 39.677  | 3697   | 3 | 505.58  | -21.52 |
| P35580 MYH10_HUMAN Myosin-10 | 32 |                       | QEELQAK                      | 849  | 8  | 5 | 31.81 | b6b7y7°y7*y7           | 974.48  | 71.058  | 3663   | 2 | 487.74  | 2.19   |
| P35580 MYH10_HUMAN Myosin-10 | 33 |                       | HADQYK                       | 1863 | 6  | 5 | 38.69 | b3b4*b4y4*y4           | 761.35  | 27.127  | 3558   | 1 | 761.35  | -9.38  |
| P35580 MYH10_HUMAN Myosin-10 | 34 | Carbamidomethyl+C(12) | ITDIIIFQAVCR                 | 785  | 13 | 5 | 32.54 | b11y3y7y12°y12         | 1595.88 | 64.906  | 3544   | 3 | 532.63  | 12.93  |
| P35580 MYH10_HUMAN Myosin-10 | 35 |                       | AMVNK                        | 68   | 5  | 1 | 12.75 | b4                     | 562.30  | 26.322  | 3530   | 1 | 562.30  | 0.65   |
| P35580 MYH10_HUMAN Myosin-10 | 36 |                       | NSLQEQQEEEEEAR               | 1345 | 14 | 5 | 23.71 | b13°b13y12y13*y13      | 1718.71 | 136.664 | 3025   | 1 | 1718.71 | -20.88 |
| P35580 MYH10_HUMAN Myosin-10 | 37 |                       | GDEVMVELAENGK                | 54   | 13 | 4 | 24.35 | b8°b8b9y9              | 1390.64 | 24.388  | 2789   | 3 | 464.22  | -10.71 |
| P35580 MYH10_HUMAN Myosin-10 | 38 |                       | DHNPGELEER                   | 206  | 10 | 7 | 50.22 | b4°b4b5b6°b6b8°b8      | 1179.56 | 27.147  | 2686   | 2 | 590.28  | -16.76 |
| P35580 MYH10_HUMAN Myosin-10 | 39 |                       | HEMPPHYAISESAYR              | 147  | 16 | 3 | 16.24 | b4y4y14                | 1900.86 | 89.164  | 2232   | 4 | 475.97  | -20.49 |
| P35580 MYH10_HUMAN Myosin-10 | 40 |                       | ELEEAR                       | 1659 | 6  | 2 | 25.94 | b3y4                   | 746.36  | 110.549 | 2179   | 1 | 746.36  | -7.11  |
| P35580 MYH10_HUMAN Myosin-10 | 41 |                       | QLEEEK                       | 1339 | 6  | 1 | 13.2  | y3                     | 775.39  | 20.599  | 1875   | 2 | 388.20  | 11.57  |
| P35580 MYH10_HUMAN Myosin-10 | 42 |                       | DEQNEEKK                     | 1583 | 8  | 4 | 39.59 | y3y4°y4y6              | 1019.46 | 40.563  | 118929 | 1 | 1019.46 | -6.29  |
| P35580 MYH10_HUMAN Myosin-10 | 43 |                       | SISARYAEER                   | 1461 | 10 | 3 | 25.72 | b7y5y8                 | 1181.59 | 68.794  | 75127  | 2 | 591.30  | -2.58  |
| P35580 MYH10_HUMAN Myosin-10 | 44 |                       | INKALDR                      | 439  | 7  | 4 | 36.13 | b3b4y6*y6              | 829.50  | 49.582  | 64429  | 2 | 415.25  | 13.76  |
| P35580 MYH10_HUMAN Myosin-10 | 45 |                       | RHEMPPHYAISESAYR             | 146  | 17 | 9 | 52.82 | b4b6b8b13y7°y7y9°y9y11 | 2056.99 | 71.027  | 46056  | 3 | 686.34  | -4.51  |
| P35580 MYH10_HUMAN Myosin-10 | 46 |                       | QTKVEGELEEMER                | 867  | 13 | 7 | 39.34 | b8*b8b11°b11b12y3y8    | 1577.74 | 62.683  | 36497  | 3 | 526.58  | -5.65  |
| P35580 MYH10_HUMAN Myosin-10 | 47 |                       | HATALEELSEQLEQAKR            | 1200 | 17 | 5 | 22.43 | b13*b13b14°b14y16      | 1953.00 | 79.270  | 22814  | 3 | 651.67  | -3.63  |
| P35580 MYH10_HUMAN Myosin-10 | 48 |                       | KALEEETK                     | 1180 | 8  | 3 | 39.59 | y4y5y7                 | 947.50  | 39.597  | 20567  | 2 | 474.25  | -8.57  |
| P35580 MYH10_HUMAN Myosin-10 | 49 |                       | LRHWQWWR                     | 828  | 8  | 3 | 34.82 | b7y3y7                 | 1267.65 | 60.922  | 19762  | 2 | 634.33  | -5.01  |
| P35580 MYH10_HUMAN Myosin-10 | 50 |                       | NLPIYSENIEMYRGK              | 129  | 16 | 4 | 16.24 | b3b7*b7y6              | 1939.98 | 116.698 | 16367  | 2 | 970.49  | -7.30  |
| P35580 MYH10_HUMAN Myosin-10 | 51 |                       | DAEALSQRLEEK                 | 1399 | 12 | 4 | 31.39 | b5b8b10°b10            | 1388.70 | 55.954  | 10305  | 2 | 694.85  | -3.87  |
| P35580 MYH10_HUMAN Myosin-10 | 52 |                       | VEEEERNQILQNEK               | 930  | 15 | 3 | 25.25 | b4b10b13               | 1886.93 | 53.847  | 9915   | 3 | 629.65  | 11.00  |
| P35580 MYH10_HUMAN Myosin-10 | 53 |                       | NVHELEKSK                    | 1525 | 9  | 6 | 52.78 | b4°b4b6°b6b7b8         | 1083.58 | 61.941  | 8695   | 2 | 542.30  | 3.04   |
| P35580 MYH10_HUMAN Myosin-10 | 54 |                       | DLSEELKTELEDTLDTTAAQQ<br>ELR | 1142 | 27 | 4 | 22.33 | y7y8y13*y13            | 3061.47 | 90.822  | 8594   | 3 | 1021.16 | -10.93 |
| P35580 MYH10_HUMAN Myosin-10 | 55 |                       | HWQWVRVFTK                   | 830  | 10 | 3 | 27.48 | b3b4y3                 | 1473.75 | 31.939  | 8367   | 3 | 491.92  | -4.97  |
| P35580 MYH10_HUMAN Myosin-10 | 56 |                       | KQELEEILHDLESR               | 916  | 14 | 6 | 30.05 | b5b10°b10b12°b12y5     | 1738.88 | 62.067  | 6144   | 3 | 580.30  | -12.29 |

|                              |    |                       |                               |      |    |    |        |                                      |         |         |       |   |         |        |
|------------------------------|----|-----------------------|-------------------------------|------|----|----|--------|--------------------------------------|---------|---------|-------|---|---------|--------|
| P35580 MYH10_HUMAN Myosin-10 | 57 |                       | VEGELEEMERK                   | 870  | 11 | 4  | 23.16  | b3b5°b5y4                            | 1348.65 | 79.329  | 5908  | 2 | 674.83  | 7.24   |
| P35580 MYH10_HUMAN Myosin-10 | 58 |                       | SDLLLEGFNRYRFLSNGYIPGQQ<br>DK | 296  | 27 | 8  | 16.88  | b4°b4b6b13°b13y3°y3*y3               | 3098.53 | 90.380  | 5263  | 3 | 1033.52 | -8.43  |
| P35580 MYH10_HUMAN Myosin-10 | 59 |                       | DYQRELEEAR                    | 1655 | 10 | 11 | 104.22 | b3b5b6b7b8°b8°b8y5y7°y7<br>y9        | 1308.61 | 28.722  | 5209  | 2 | 654.81  | -4.20  |
| P35580 MYH10_HUMAN Myosin-10 | 60 |                       | YLFVDRAVIYNPATQADWTAK         | 12   | 21 | 6  | 13.18  | b6°b6y9°y9y12*y12                    | 2442.21 | 107.357 | 4869  | 3 | 814.74  | -14.10 |
| P35580 MYH10_HUMAN Myosin-10 | 61 |                       | QLRADMEDLMSSK                 | 1507 | 13 | 5  | 19.58  | b9°b9y4°y4y7                         | 1523.72 | 87.526  | 4691  | 2 | 762.36  | 1.92   |
| P35580 MYH10_HUMAN Myosin-10 | 62 |                       | AVIYNPATQADWTAKK              | 18   | 16 | 3  | 22.77  | b12y12y13                            | 1776.92 | 135.154 | 4246  | 2 | 888.96  | -6.59  |
| P35580 MYH10_HUMAN Myosin-10 | 63 |                       | TGLEDPERYLFDVDR               | 4    | 14 | 3  | 26.85  | b8b10b12                             | 1709.85 | 91.447  | 4239  | 3 | 570.62  | -1.21  |
| P35580 MYH10_HUMAN Myosin-10 | 64 |                       | ELEEARASR                     | 1659 | 9  | 3  | 29.25  | b6y6y7                               | 1060.52 | 28.341  | 4035  | 2 | 530.77  | -12.89 |
| P35580 MYH10_HUMAN Myosin-10 | 65 |                       | QELEELHDLESERVEEEEEER         | 917  | 20 | 5  | 29.53  | y3y4y9y12°y12                        | 2511.19 | 53.262  | 3852  | 4 | 628.55  | 0.97   |
| P35580 MYH10_HUMAN Myosin-10 | 66 |                       | RQLHLEGASLELSDDDTESK          | 1943 | 20 | 7  | 40.26  | b16y5y9y12°y12y13y16                 | 2243.05 | 80.444  | 3850  | 3 | 748.35  | -13.82 |
| P35580 MYH10_HUMAN Myosin-10 | 67 | Carbamidomethyl+C(3)  | QACERMIR                      | 744  | 8  | 3  | 34.82  | b3y3y5                               | 1063.51 | 25.358  | 3769  | 2 | 532.26  | -5.74  |
| P35580 MYH10_HUMAN Myosin-10 | 68 | Carbamidomethyl+C(4)  | IAECSSQLAEIEEEKAK             | 1007 | 16 | 7  | 40.1   | b4b8°b8°b8b9y8y9                     | 1821.85 | 68.588  | 3421  | 4 | 456.22  | -0.67  |
| P35580 MYH10_HUMAN Myosin-10 | 69 | Carbamidomethyl+C(12) | QGLETDNKELACEVK               | 1226 | 15 | 8  | 35.18  | b4b12°b12b13°b13y4y10°<br>y10        | 1733.84 | 51.840  | 3231  | 2 | 867.43  | 3.17   |
| P35580 MYH10_HUMAN Myosin-10 | 70 |                       | KVDDDLGTIESLEEAK              | 1378 | 16 | 4  | 26.27  | b7y3y7y13                            | 1761.88 | 105.323 | 2125  | 2 | 881.44  | 1.39   |
| P35580 MYH10_HUMAN Myosin-10 | 71 |                       | HADQYKEQMEK                   | 1863 | 11 | 3  | 23.16  | b6y4y10                              | 1406.65 | 61.917  | 2075  | 1 | 1406.65 | 11.11  |
| P35580 MYH10_HUMAN Myosin-10 | 72 |                       | GGPISFSSRSRGR                 | 1930 | 13 | 3  | 27.06  | b6b8b9                               | 1294.65 | 75.449  | 2048  | 2 | 647.83  | -1.13  |
| P35580 MYH10_HUMAN Myosin-10 | 73 |                       | NSLQEQEEEEEAR                 | 1345 | 15 | 4  | 36.45  | b6b7b8y6                             | 1846.84 | 83.371  | 2019  | 2 | 923.92  | -2.91  |
| P35580 MYH10_HUMAN Myosin-10 | 74 |                       | ALEEALKEEERFER                | 1490 | 14 | 3  | 18.27  | b4b12y10                             | 1663.84 | 79.247  | 1766  | 3 | 555.28  | 10.71  |
| P35580 MYH10_HUMAN Myosin-10 | 75 |                       | EELQGalARGDDETLHK             | 1088 | 18 | 7  | 25.28  | b8b9°b9b12°b12y8°y8                  | 2010.95 | 128.381 | 1719  | 2 | 1005.98 | -9.65  |
| P35580 MYH10_HUMAN Myosin-10 | 76 |                       | DELADEITNSASGKSALLDEK         | 1710 | 21 | 3  | 33.97  | b11b12b13                            | 2206.06 | 62.616  | 1676  | 3 | 736.03  | -5.20  |
| P35580 MYH10_HUMAN Myosin-10 | 77 |                       | DVDRIVGLDQVTGMTETAFGSAY<br>K  | 620  | 24 | 5  | 18.42  | b5y6y9°y9y12                         | 2573.23 | 105.830 | 1508  | 2 | 1287.12 | -11.48 |
| P35580 MYH10_HUMAN Myosin-10 | 78 | Phosphoryl STY(11)    | NMDPLNDNVATLLHQSSDR           | 594  | 19 | 4  | 22.39  | b10y3y7y12                           | 2219.97 | 84.128  | 22863 | 3 | 740.66  | 2.86   |
| P35580 MYH10_HUMAN Myosin-10 | 79 | Phosphoryl STY(8)     | LQAQMKYQRELEEAR               | 1649 | 16 | 3  | 24.61  | y7y9y10                              | 2087.94 | 73.965  | 6828  | 2 | 1044.47 | -6.20  |
| P35580 MYH10_HUMAN Myosin-10 | 80 | Phosphoryl STY(15)    | SLEAEILQLQEELASSER            | 1683 | 18 | 5  | 20.44  | b5b13y3°y3y12                        | 2124.97 | 107.306 | 3731  | 3 | 709.00  | -10.91 |
| P35580 MYH10_HUMAN Myosin-10 | 81 | Phosphoryl STY(16)    | LQRELDDEANEGLSR               | 1902 | 17 | 7  | 60.1   | b11b12°b12b14_H3PO4<br>b13b14b15°b15 | 1996.89 | 98.951  | 2684  | 3 | 666.30  | -0.37  |
| P35580 MYH10_HUMAN Myosin-10 | 82 | Oxidation+M(4)        | EIFMQVEDER                    | 1852 | 10 | 3  | 25.72  | b4b8y5                               | 1311.58 | 38.799  | 6052  | 2 | 656.30  | -4.19  |
| P35580 MYH10_HUMAN Myosin-10 | 83 | Oxidation+M(4)        | QEVMSIDLEER                   | 1031 | 11 | 3  | 23.16  | b8y5y10                              | 1364.64 | 62.772  | 4503  | 3 | 455.55  | 4.92   |
| P35580 MYH10_HUMAN Myosin-10 | 84 | Oxidation+M(15)       | IAQLEEEEEEQSNMELLNDR          | 1737 | 21 | 4  | 17.76  | b3b10y8y10                           | 2548.18 | 123.540 | 3712  | 3 | 850.07  | 3.74   |
| P35580 MYH10_HUMAN Myosin-10 | 85 | Oxidation+M(4)        | EIFMQVEDERR                   | 1852 | 11 | 4  | 23.16  | b3y6°y6y9                            | 1467.68 | 38.519  | 3293  | 2 | 734.35  | -3.24  |

|                                                               |    |                                                |                                 |      |    |    |       |                                    |         |         |        |   |         |        |
|---------------------------------------------------------------|----|------------------------------------------------|---------------------------------|------|----|----|-------|------------------------------------|---------|---------|--------|---|---------|--------|
| P35580 MYH10_HUMAN Myosin-10                                  | 86 | Oxidation+M(8)                                 | VEGELEEMERK                     | 870  | 11 | 4  | 39.88 | b4b6b10y8                          | 1364.64 | 53.240  | 2185   | 3 | 455.55  | -0.45  |
| P35580 MYH10_HUMAN Myosin-10                                  | 87 | Oxidation+M(3)                                 | HEMPPHYAISESAYR                 | 147  | 16 | 4  | 35.93 | b9b10y7y8                          | 1916.91 | 53.868  | 1853   | 2 | 958.96  | 9.55   |
| P35580 MYH10_HUMAN Myosin-10                                  | 88 |                                                | AQMKDYQRELEEAR                  | 1651 | 14 | 5  | 24.61 | b4b6*b6b7*b7                       | 1766.83 | 71.784  | 10423  | 3 | 589.61  | -13.33 |
| P48443 RXRG_HUMAN Retinoic acid receptor RXR-gamma            | 1  |                                                | MKDMQMDK                        | 357  | 8  | 9  | 60.31 | b6b8*b8y2y3y4y5y7*y7               | 1026.44 | 27.164  | 4060   | 2 | 513.72  | -1.67  |
| P48443 RXRG_HUMAN Retinoic acid receptor RXR-gamma            | 2  | Carbamidomethyl+C(6);<br>Carbamidomethyl+C(12) | DLIYTCRDNKDCLIDK                | 169  | 16 | 4  | 16.24 | b7b10*b10y11                       | 2041.97 | 71.062  | 2539   | 4 | 511.25  | 2.69   |
| P48443 RXRG_HUMAN Retinoic acid receptor RXR-gamma            | 3  |                                                | LIGDTPIDTFLMEMLETPLQIT          | 441  | 22 | 6  | 25.8  | b11*b11b12y4y11*y11                | 2491.27 | 102.722 | 200606 | 3 | 831.09  | -0.78  |
| P48443 RXRG_HUMAN Retinoic acid receptor RXR-gamma            | 4  |                                                | GLSNPSEVETLR                    | 382  | 12 | 5  | 32.67 | b5y6y7*y7y10                       | 1301.66 | 53.165  | 1517   | 1 | 1301.66 | -5.53  |
| P48443 RXRG_HUMAN Retinoic acid receptor RXR-gamma            | 5  | Carbamidomethyl+C(4)                           | YQKCLVMGMK                      | 195  | 10 | 3  | 40.49 | b4b6b9                             | 1257.63 | 53.982  | 9230   | 2 | 629.32  | 12.23  |
| P48443 RXRG_HUMAN Retinoic acid receptor RXR-gamma            | 6  | Carbamidomethyl+C(7);<br>Carbamidomethyl+C(10) | HYGVYSCGCKGFFK                  | 149  | 15 | 3  | 17.17 | b4y4y7                             | 1838.78 | 37.261  | 1757   | 3 | 613.60  | -11.42 |
| P17066 HSP76_HUMAN Heat shock 70 kDa protein 6                | 1  |                                                | TTPSYVAFTDTER                   | 38   | 13 | 9  | 92.82 | b1y3y4y5y6y7y9y11y13               | 1487.70 | 54.288  | 61045  | 2 | 744.35  | 0.74   |
| P17066 HSP76_HUMAN Heat shock 70 kDa protein 6                | 2  |                                                | QGDPSTGPPIIEVD                  | 629  | 14 | 4  | 29.26 | b8y6y8y9                           | 1456.68 | 49.213  | 20805  | 3 | 486.23  | -3.52  |
| P17066 HSP76_HUMAN Heat shock 70 kDa protein 6                | 3  | Carbamidomethyl+C(1)                           | CREVLAWLEHNQLAEK                | 575  | 16 | 4  | 16.24 | b4*b4b7y8                          | 1996.02 | 100.000 | 3045   | 3 | 666.01  | 6.36   |
| P17066 HSP76_HUMAN Heat shock 70 kDa protein 6                | 4  |                                                | NSLEAHVFHVK                     | 541  | 11 | 4  | 23.16 | b3*b3b8y10                         | 1280.69 | 73.234  | 107351 | 2 | 640.85  | 14.87  |
| P17066 HSP76_HUMAN Heat shock 70 kDa protein 6                | 5  | Carbamidomethyl+C(13)                          | LYGGPGVPGSSCGTQAR               | 611  | 18 | 3  | 14.75 | b8b14y11                           | 1720.79 | 59.987  | 74448  | 3 | 574.27  | -10.14 |
| P17066 HSP76_HUMAN Heat shock 70 kDa protein 6                | 6  |                                                | EVLAWLEHNQLAEK                  | 577  | 14 | 4  | 31.53 | b5b8y7y8                           | 1679.86 | 36.428  | 11511  | 3 | 560.63  | -6.18  |
| P17066 HSP76_HUMAN Heat shock 70 kDa protein 6                | 7  | Carbamidomethyl+C(6)                           | ELEQICRPFSR                     | 599  | 12 | 5  | 28.38 | b7b10*b10b11*b11                   | 1547.79 | 75.388  | 1839   | 2 | 774.40  | -8.12  |
| P17066 HSP76_HUMAN Heat shock 70 kDa protein 6                | 8  |                                                | IPEEDR                          | 563  | 6  | 1  | 13.2  | y4                                 | 758.37  | 54.182  | 1583   | 2 | 379.69  | -1.85  |
| P17066 HSP76_HUMAN Heat shock 70 kDa protein 6                | 9  |                                                | FADTTVQSDMKHWPFPR               | 79   | 16 | 3  | 16.24 | b6b9y5                             | 1965.94 | 47.069  | 9549   | 2 | 983.47  | 6.33   |
| P17066 HSP76_HUMAN Heat shock 70 kDa protein 6                | 10 | Carbamidomethyl+C(19)                          | MQAPRELAVGIDLGGTYSCVGVF<br>QQGR | 0    | 27 | 4  | 21.49 | b7*b7b8y16                         | 2953.42 | 110.544 | 5626   | 3 | 985.15  | -14.05 |
| P17066 HSP76_HUMAN Heat shock 70 kDa protein 6                | 11 |                                                | EEVERMVHEAEQYK                  | 514  | 14 | 3  | 18.27 | b3b6y3                             | 1776.82 | 26.384  | 5026   | 3 | 592.95  | -0.41  |
| P17066 HSP76_HUMAN Heat shock 70 kDa protein 6                | 12 |                                                | EVLAWLEHNQLAEKEEYEHQK           | 577  | 21 | 11 | 72.16 | b7b13b16b19y4y5*y5y6y1<br>0y11*y11 | 2623.28 | 116.624 | 2789   | 3 | 875.10  | 0.74   |
| P17066 HSP76_HUMAN Heat shock 70 kDa protein 6                | 13 |                                                | KFADTTVQSDMK                    | 78   | 12 | 4  | 46.35 | b4b5b8b9                           | 1370.64 | 136.329 | 1976   | 1 | 1370.64 | -14.52 |
| P17066 HSP76_HUMAN Heat shock 70 kDa protein 6                | 14 | Phosphoryl STY(9)                              | TLSSSTQATLEIDSLFEGVDFYTSI<br>TR | 274  | 27 | 3  | 11.49 | b8b10y9                            | 3061.45 | 117.510 | 14748  | 3 | 1021.15 | 9.97   |
| P17066 HSP76_HUMAN Heat shock 70 kDa protein 6                | 15 | Oxidation+M()                                  | FADTTVQSDMK                     | 79   | 11 | 4  | 23.16 | b3b5*b5y3                          | 1258.55 | 39.666  | 17611  | 2 | 629.78  | -8.63  |
| Q9Y2G4 ANKR6_HUMAN Ankyrin repeat domain-containing protein 6 | 1  |                                                | ALNSTATQR                       | 564  | 9  | 11 | 72.26 | b1b3*b3b6b7*b7y3*y3y4y<br>8*y8     | 961.52  | 25.312  | 13564  | 2 | 481.26  | 9.78   |
| Q9Y2G4 ANKR6_HUMAN Ankyrin repeat domain-containing protein 6 | 2  |                                                | KEEAREEFLSASPEPR                | 316  | 16 | 4  | 26.27 | b9b11b13y10                        | 1874.91 | 72.363  | 1668   | 3 | 625.64  | -7.55  |
| Q9Y2G4 ANKR6_HUMAN Ankyrin repeat domain-containing protein 6 | 3  | Carbamidomethyl+C(10)                          | AGNTALHLACQNSHSQSTR             | 139  | 19 | 4  | 21.11 | b5b7b11*b11                        | 2052.93 | 58.532  | 16376  | 3 | 684.98  | -14.63 |

|                                                               |    |                       |                              |     |    |    |       |                                                     |         |         |       |   |         |        |
|---------------------------------------------------------------|----|-----------------------|------------------------------|-----|----|----|-------|-----------------------------------------------------|---------|---------|-------|---|---------|--------|
| Q9Y2G4 ANKR6_HUMAN Ankyrin repeat domain-containing protein 6 | 4  |                       | GSVSAGDTPSSEQAVAR            | 299 | 17 | 14 | 90.9  | b4b5b7b9°b9b12y8y9°y9y10*y10y11y13°y13              | 1618.77 | 44.905  | 15563 | 3 | 540.26  | -0.75  |
| Q9Y2G4 ANKR6_HUMAN Ankyrin repeat domain-containing protein 6 | 5  |                       | LSGDSR                       | 516 | 6  | 1  | 13.2  | b4                                                  | 634.32  | 53.990  | 8551  | 1 | 634.32  | 6.45   |
| Q9Y2G4 ANKR6_HUMAN Ankyrin repeat domain-containing protein 6 | 6  |                       | AQSVPR                       | 286 | 6  | 1  | 13.2  | b3                                                  | 657.37  | 65.083  | 7712  | 1 | 657.37  | 4.46   |
| Q9Y2G4 ANKR6_HUMAN Ankyrin repeat domain-containing protein 6 | 7  |                       | DTSQALELTQYFFEAVSTQMEK       | 659 | 22 | 18 | 94.31 | b7°b7b8b11*b11b12*b12y4°y4y5*y5y6°y6y7°y7y11°y11y12 | 2566.21 | 86.214  | 4036  | 2 | 1283.61 | 4.00   |
| Q9Y2G4 ANKR6_HUMAN Ankyrin repeat domain-containing protein 6 | 8  | Carbamidomethyl+C(9)  | VMQAPINGCR                   | 403 | 10 | 7  | 70.94 | b4b7y3y6*y6y7y9                                     | 1145.55 | 62.018  | 2440  | 2 | 573.28  | -3.94  |
| Q9Y2G4 ANKR6_HUMAN Ankyrin repeat domain-containing protein 6 | 9  |                       | NQAGDTALHVAAALNHKK           | 203 | 18 | 6  | 33.67 | b7°b7b8*b8b9°b9                                     | 1858.98 | 51.260  | 23954 | 2 | 929.99  | -3.61  |
| Q9Y2G4 ANKR6_HUMAN Ankyrin repeat domain-containing protein 6 | 10 | Carbamidomethyl+C(19) | ALNSTATQRLQQLSSSDCTGSR       | 564 | 23 | 3  | 12.44 | b6y15y22                                            | 2510.22 | 83.350  | 19443 | 2 | 1255.61 | 12.06  |
| Q9Y2G4 ANKR6_HUMAN Ankyrin repeat domain-containing protein 6 | 11 |                       | LGQMENKTQHQMR                | 446 | 13 | 5  | 32.54 | b7y4y10*y10y12                                      | 1600.75 | 46.448  | 9728  | 2 | 800.88  | -11.59 |
| Q9Y2G4 ANKR6_HUMAN Ankyrin repeat domain-containing protein 6 | 12 |                       | SLEELAKLR                    | 710 | 10 | 3  | 25.72 | b5b7y3                                              | 1187.68 | 67.503  | 9568  | 2 | 594.34  | 11.41  |
| Q9Y2G4 ANKR6_HUMAN Ankyrin repeat domain-containing protein 6 | 13 |                       | DEVAQSKGSVSAGDTPSSEQAVAR     | 292 | 24 | 6  | 26.08 | b5b15*b15y9y13y14                                   | 2376.11 | 78.714  | 5376  | 2 | 1188.56 | -8.32  |
| Q9Y2G4 ANKR6_HUMAN Ankyrin repeat domain-containing protein 6 | 14 |                       | DGNTALHEASWHGFSQAKLLVK       | 106 | 23 | 4  | 35.86 | b5b6b7b12                                           | 2496.25 | 64.991  | 4766  | 3 | 832.75  | -6.75  |
| Q9Y2G4 ANKR6_HUMAN Ankyrin repeat domain-containing protein 6 | 15 | Carbamidomethyl+C(8)  | LSAERTECLNR                  | 468 | 11 | 4  | 30.14 | b7°b7b9b10                                          | 1348.64 | 136.309 | 4426  | 1 | 1348.64 | -14.66 |
| Q9Y2G4 ANKR6_HUMAN Ankyrin repeat domain-containing protein 6 | 16 | Carbamidomethyl+C(12) | DGKVMQAPINGCR                | 400 | 13 | 5  | 27.06 | b6°b6b7b12°b12                                      | 1445.71 | 42.924  | 4417  | 2 | 723.36  | 9.71   |
| Q9Y2G4 ANKR6_HUMAN Ankyrin repeat domain-containing protein 6 | 17 |                       | NLHAHNHPKK                   | 363 | 10 | 4  | 46.24 | b3b5b7y8                                            | 1195.64 | 25.291  | 3969  | 2 | 598.33  | -0.71  |
| Q9Y2G4 ANKR6_HUMAN Ankyrin repeat domain-containing protein 6 | 18 | Carbamidomethyl+C(12) | QISLVDELKTWCMLK              | 494 | 15 | 3  | 23.19 | b3b4y4                                              | 1863.98 | 97.173  | 3495  | 3 | 622.00  | 3.80   |
| Q9Y2G4 ANKR6_HUMAN Ankyrin repeat domain-containing protein 6 | 19 |                       | VSAFSDPTPPADQPPGHQKNLHAHNHPK | 344 | 28 | 8  | 26.33 | b5°b5b11b13b23y8*y8y12                              | 3055.48 | 107.179 | 2086  | 4 | 764.63  | -2.72  |
| Q9Y2G4 ANKR6_HUMAN Ankyrin repeat domain-containing protein 6 | 20 | Phosphoryl STY(8)     | GSVSAGDTPSSEQAVARK           | 299 | 18 | 3  | 14.75 | b6y11y13_HPO3 y13                                   | 1826.79 | 71.044  | 2148  | 3 | 609.60  | -13.50 |
| Q9Y2G4 ANKR6_HUMAN Ankyrin repeat domain-containing protein 6 | 21 | Oxidation+M(20)       | DTSQALELTQYFFEAVSTQMEK       | 659 | 22 | 5  | 19.74 | b5y5°y5y7y13                                        | 2582.20 | 91.555  | 3979  | 2 | 1291.60 | -0.28  |
| Q9P278 FNIP2_HUMAN Folliculin-interacting protein 2           | 1  | Carbamidomethyl+C(12) | GPLVAGANIPCGDDNKK            | 860 | 18 | 3  | 14.75 | b4y11y16                                            | 1782.87 | 48.993  | 10248 | 3 | 594.96  | -3.97  |
| Q9P278 FNIP2_HUMAN Folliculin-interacting protein 2           | 2  |                       | IEEVTAQK                     | 71  | 8  | 7  | 62.07 | b2b5b6b7y4y5*y5                                     | 917.49  | 29.419  | 6128  | 2 | 459.25  | -6.72  |

|                                                     |    |                                                                          |                                    |      |    |   |       |                   |         |         |        |   |         |        |
|-----------------------------------------------------|----|--------------------------------------------------------------------------|------------------------------------|------|----|---|-------|-------------------|---------|---------|--------|---|---------|--------|
| Q9P278 FNIP2_HUMAN Folliculin-interacting protein 2 | 3  | Carbamidomethyl+C(7)                                                     | SLLAGYCPTYMPDLVLHGTGSDEK           | 945  | 24 | 4 | 21.44 | b1b9b10y12        | 2624.26 | 100.567 | 5390   | 3 | 875.43  | 9.12   |
| Q9P278 FNIP2_HUMAN Folliculin-interacting protein 2 | 4  |                                                                          | SQTTSLENGIIPRR                     | 272  | 14 | 4 | 31.53 | b4b5y4y13         | 1571.85 | 74.330  | 3142   | 1 | 1571.85 | 3.03   |
| Q9P278 FNIP2_HUMAN Folliculin-interacting protein 2 | 5  |                                                                          | LSEGDEGESDK                        | 782  | 11 | 4 | 26.17 | b5b6y4y11         | 1165.49 | 44.118  | 2117   | 3 | 389.17  | -0.31  |
| Q9P278 FNIP2_HUMAN Folliculin-interacting protein 2 | 6  | Carbamidomethyl+C(4)                                                     | LPSCEVLGAGMK                       | 664  | 12 | 3 | 21.17 | b11y3y11          | 1261.64 | 51.794  | 66524  | 2 | 631.32  | 11.32  |
| Q9P278 FNIP2_HUMAN Folliculin-interacting protein 2 | 7  |                                                                          | QVLFDISK                           | 60   | 7  | 4 | 36.13 | b5b6*b6y4         | 836.44  | 32.025  | 26412  | 2 | 418.72  | -18.83 |
| Q9P278 FNIP2_HUMAN Folliculin-interacting protein 2 | 8  |                                                                          | LEATR                              | 833  | 5  | 4 | 25.49 | y3°y3y4°y4        | 589.33  | 54.518  | 22545  | 1 | 589.33  | 2.69   |
| Q9P278 FNIP2_HUMAN Folliculin-interacting protein 2 | 9  |                                                                          | VFSAR                              | 170  | 5  | 2 | 25.49 | y3y4              | 579.33  | 61.199  | 19911  | 1 | 579.33  | 7.90   |
| Q9P278 FNIP2_HUMAN Folliculin-interacting protein 2 | 10 |                                                                          | DLVQR                              | 511  | 5  | 2 | 25.49 | b3y3              | 630.36  | 26.346  | 7612   | 1 | 630.36  | 3.87   |
| Q9P278 FNIP2_HUMAN Folliculin-interacting protein 2 | 11 |                                                                          | GFAEDR                             | 793  | 6  | 4 | 25.94 | b4*b4b5°b5        | 694.31  | 29.571  | 6322   | 1 | 694.31  | -2.55  |
| Q9P278 FNIP2_HUMAN Folliculin-interacting protein 2 | 12 |                                                                          | YQYTRPASDVNMLGEMMFQSVAMSYK         | 125  | 26 | 5 | 17.34 | b6*b6b13b21y3     | 2976.30 | 98.006  | 5592   | 4 | 744.83  | -11.98 |
| Q9P278 FNIP2_HUMAN Folliculin-interacting protein 2 | 13 |                                                                          | GSSGSSAAASAQGR                     | 13   | 14 | 5 | 18.27 | b4y9y13°y13*y13   | 1193.54 | 39.718  | 4998   | 3 | 398.52  | -11.56 |
| Q9P278 FNIP2_HUMAN Folliculin-interacting protein 2 | 14 | Carbamidomethyl+C(9);<br>Carbamidomethyl+C(13);<br>Carbamidomethyl+C(29) | RPEQGSEACSAGCLGPASDASWKPQN AFCGDEK | 620  | 33 | 3 | 10.9  | b14b16y12         | 3567.58 | 81.880  | 4914   | 4 | 892.65  | 12.11  |
| Q9P278 FNIP2_HUMAN Folliculin-interacting protein 2 | 15 | Carbamidomethyl+C(4)                                                     | NQLCQR                             | 410  | 6  | 1 | 13.2  | y3                | 818.40  | 34.505  | 3583   | 1 | 818.40  | 10.66  |
| Q9P278 FNIP2_HUMAN Folliculin-interacting protein 2 | 16 | Carbamidomethyl+C(2)                                                     | ACGPSLEAEEAADVAQDPQVSR             | 743  | 22 | 4 | 17.05 | b6b11y6y11        | 2258.07 | 87.500  | 3571   | 2 | 1129.54 | 16.76  |
| Q9P278 FNIP2_HUMAN Folliculin-interacting protein 2 | 17 | Carbamidomethyl+C(8)                                                     | LHLPADFCIMHLEDR                    | 1043 | 15 | 4 | 17.17 | b11°b11y4y10      | 1866.91 | 74.349  | 3045   | 2 | 933.96  | 7.98   |
| Q9P278 FNIP2_HUMAN Folliculin-interacting protein 2 | 18 |                                                                          | TSQSVNMLAK                         | 467  | 10 | 7 | 38.46 | b4*b4b5°b5b8*b8y8 | 1078.55 | 103.719 | 2303   | 2 | 539.78  | -5.32  |
| Q9P278 FNIP2_HUMAN Folliculin-interacting protein 2 | 19 |                                                                          | TGSNLAHSTPVDMPSR                   | 213  | 16 | 7 | 43.79 | b3b4b7b8°b8*b8y4  | 1669.76 | 27.780  | 2104   | 4 | 418.20  | -19.74 |
| Q9P278 FNIP2_HUMAN Folliculin-interacting protein 2 | 20 |                                                                          | WSVQVATSQR                         | 1003 | 10 | 4 | 25.72 | b3b8y3*y3         | 1161.62 | 54.656  | 1916   | 2 | 581.31  | 15.13  |
| Q9P278 FNIP2_HUMAN Folliculin-interacting protein 2 | 21 |                                                                          | IAEPVWLTMMSGTLEK                   | 394  | 16 | 3 | 16.24 | b4y4y8            | 1805.91 | 110.460 | 1787   | 2 | 903.46  | -6.35  |
| Q9P278 FNIP2_HUMAN Folliculin-interacting protein 2 | 22 | Carbamidomethyl+C(7)                                                     | LIVYQDCDR                          | 48   | 9  | 5 | 29.25 | b6°b6*b6y7y8      | 1181.57 | 27.121  | 1781   | 2 | 591.29  | 4.75   |
| Q9P278 FNIP2_HUMAN Folliculin-interacting protein 2 | 23 |                                                                          | VTFQIGSFASPESEDFESR                | 716  | 18 | 4 | 14.75 | b3°b3b12y3        | 2003.95 | 84.163  | 1640   | 4 | 501.74  | 5.48   |
| Q9P278 FNIP2_HUMAN Folliculin-interacting protein 2 | 24 | Carbamidomethyl+C(12)                                                    | GPGLVAGANIPCGDDNK                  | 860  | 17 | 3 | 15.44 | b8y10y13          | 1654.78 | 62.029  | 1542   | 4 | 414.45  | -2.14  |
| Q9P278 FNIP2_HUMAN Folliculin-interacting protein 2 | 25 | Carbamidomethyl+C(4)                                                     | NQLCQRFLK                          | 410  | 9  | 5 | 37.03 | b3*b3b7b8*b8      | 1206.63 | 98.141  | 103946 | 2 | 603.82  | -6.88  |
| Q9P278 FNIP2_HUMAN Folliculin-interacting protein 2 | 26 | Carbamidomethyl+C(13)                                                    | EAPQDGSRRLPSCVLGAGMK               | 655  | 21 | 5 | 23.54 | b13°b13b16b17y5   | 2189.01 | 65.127  | 72639  | 4 | 548.01  | -8.48  |
| Q9P278 FNIP2_HUMAN Folliculin-interacting protein 2 | 27 | Carbamidomethyl+C(11)                                                    | HNPWPTGFPECEPGETDSRDGLKPK          | 590  | 26 | 3 | 11.67 | b6y16y21          | 2950.38 | 78.148  | 28496  | 4 | 738.35  | -0.91  |
| Q9P278 FNIP2_HUMAN Folliculin-interacting protein 2 | 28 | Carbamidomethyl+C(8)                                                     | LHLPADFCIMHLEDRLQEMYLK             | 1043 | 22 | 3 | 21.54 | b10b11y6          | 2772.33 | 117.561 | 14973  | 3 | 924.78  | -12.68 |
| Q9P278 FNIP2_HUMAN Folliculin-interacting protein 2 | 29 |                                                                          | VTFQIGSFASPESEDFESRMK              | 716  | 20 | 5 | 13.63 | b6b9°b9y12°y12    | 2263.07 | 114.716 | 11397  | 3 | 755.03  | 0.76   |
| Q9P278 FNIP2_HUMAN Folliculin-interacting protein 2 | 30 | Carbamidomethyl+C(10)                                                    | SAIEKAMISCR                        | 348  | 11 | 4 | 35.11 | b5b6b10y4         | 1265.63 | 51.790  | 9676   | 2 | 633.32  | -1.54  |

|                                                     |    |                                                |                                         |      |    |    |       |                                     |         |         |       |   |         |        |
|-----------------------------------------------------|----|------------------------------------------------|-----------------------------------------|------|----|----|-------|-------------------------------------|---------|---------|-------|---|---------|--------|
| Q9P278 FNIP2_HUMAN Folliculin-interacting protein 2 | 31 | Carbamidomethyl+C(6)                           | SVAWPCPDRHLR                            | 697  | 12 | 3  | 28.38 | y3y8y9                              | 1493.73 | 50.641  | 9509  | 3 | 498.58  | -5.88  |
| Q9P278 FNIP2_HUMAN Folliculin-interacting protein 2 | 32 | Carbamidomethyl+C(4)                           | VKACGPSLEAEEAADVQDPQVSR                 | 741  | 24 | 3  | 12.15 | b23y7y16                            | 2485.21 | 82.005  | 3819  | 2 | 1243.11 | 3.24   |
| Q9P278 FNIP2_HUMAN Folliculin-interacting protein 2 | 33 | Carbamidomethyl+C(4);<br>Carbamidomethyl+C(19) | LPSCEVLGAGMKMDQQA VCELL<br>K            | 664  | 23 | 4  | 34.29 | b6°b6b7b8                           | 2577.27 | 102.465 | 3333  | 4 | 645.07  | 7.10   |
| Q9P278 FNIP2_HUMAN Folliculin-interacting protein 2 | 34 | Carbamidomethyl+C(5);<br>Carbamidomethyl+C(6)  | ISAKCCQGSSSSVSSSSSISSHSSS<br>GGSSHHAK   | 86   | 34 | 4  | 12.48 | b12b17y6y13                         | 3339.48 | 91.336  | 2594  | 2 | 1670.24 | 5.85   |
| Q9P278 FNIP2_HUMAN Folliculin-interacting protein 2 | 35 |                                                | YQYTRPASDVNMLGEMMFGSVA<br>MSYKGGSTLK    | 125  | 31 | 4  | 11.01 | b6°b6b9y10                          | 3462.58 | 118.277 | 2397  | 5 | 693.32  | -10.65 |
| Q9P278 FNIP2_HUMAN Folliculin-interacting protein 2 | 36 |                                                | RGSSGSSAAASAQGR                         | 12   | 15 | 10 | 63.39 | b11b13y7*y7y8y12°y12y1<br>3°y13y14  | 1349.65 | 55.244  | 2108  | 3 | 450.55  | -1.63  |
| Q9P278 FNIP2_HUMAN Folliculin-interacting protein 2 | 37 | Phosphoryl STY(8)                              | WSVQVATSQRK                             | 1003 | 11 | 8  | 61.39 | b3b6y4y8*y8y9y10*y10                | 1369.67 | 53.173  | 3871  | 2 | 685.34  | 14.88  |
| Q9P278 FNIP2_HUMAN Folliculin-interacting protein 2 | 38 | Phosphoryl STY()                               | TGSNLAHSTPVDMP SR                       | 213  | 16 | 6  | 22.87 | b4°b4b7°b7y4y9                      | 1749.75 | 31.140  | 1574  | 2 | 875.38  | -0.49  |
| Q9P278 FNIP2_HUMAN Folliculin-interacting protein 2 | 39 | Carbamidomethyl+C(7);<br>Oxidation+M(11)       | SLLAGYCPTYMPDLVLHGTGSDE<br>K            | 945  | 24 | 3  | 21.44 | b8b9y5                              | 2640.23 | 74.347  | 22752 | 4 | 660.81  | -2.13  |
| Q9P278 FNIP2_HUMAN Folliculin-interacting protein 2 | 40 | Carbamidomethyl+C(8);<br>Oxidation+M(10)       | LHLPADFCIMHLEDR                         | 1043 | 15 | 4  | 17.17 | b9°b9y4y8                           | 1882.90 | 75.338  | 11009 | 3 | 628.30  | 1.62   |
| Q9P278 FNIP2_HUMAN Folliculin-interacting protein 2 | 41 | Oxidation+M(13)                                | TGSNLAHSTPVDMP SR                       | 213  | 16 | 4  | 26.94 | b9b11b12y11                         | 1685.80 | 42.881  | 2790  | 3 | 562.60  | 4.06   |
| Q9P278 FNIP2_HUMAN Folliculin-interacting protein 2 | 42 |                                                | QTTSLENGIIPRR                           | 273  | 13 | 1  | 7.25  | b8                                  | 1484.82 | 74.345  | 16848 | 2 | 742.91  | 0.99   |
| Q9P278 FNIP2_HUMAN Folliculin-interacting protein 2 | 43 |                                                | SQTTSLENGIIPRR                          | 272  | 14 | 1  | 7.25  | y3                                  | 1554.81 | 74.303  | 5256  | 3 | 518.94  | -5.26  |
| P35527 K1C9_HUMAN Keratin                           | 1  |                                                | DIENQYETQITQIEHEVSSSGQEVQ<br>SSAK       | 339  | 29 | 5  | 11.2  | b2b4y8y24y29                        | 3264.53 | 82.453  | 19726 | 3 | 1088.85 | 5.09   |
| P35527 K1C9_HUMAN Keratin                           | 2  |                                                | SGGGGGGLGSGGSIR                         | 13   | 16 | 13 | 63.96 | b1b2b3°b3b5b6b14b15y2y<br>7y8°y8y16 | 1232.60 | 28.776  | 14446 | 2 | 616.80  | 1.68   |
| P35527 K1C9_HUMAN Keratin                           | 3  |                                                | DIENQYETQITQIEHEVSSSGQEVQ<br>SSAKEVTQLR | 339  | 35 | 3  | 16.58 | b3b10b12                            | 3990.90 | 47.035  | 2772  | 3 | 1330.97 | -3.18  |
| P35527 K1C9_HUMAN Keratin                           | 4  |                                                | EIETYHNLEGGQEDFESSGAGK                  | 449  | 23 | 5  | 27.92 | b16y3y6y8y14                        | 2510.14 | 63.532  | 25460 | 3 | 837.38  | 2.53   |
| P35527 K1C9_HUMAN Keratin                           | 5  |                                                | LASYLDK                                 | 163  | 7  | 3  | 36.13 | b4y4y5                              | 809.43  | 36.803  | 21135 | 2 | 405.22  | -7.39  |
| P35527 K1C9_HUMAN Keratin                           | 6  |                                                | SLEDTK                                  | 396  | 6  | 1  | 13.2  | y4                                  | 692.35  | 31.942  | 9858  | 1 | 692.35  | 3.70   |
| P35527 K1C9_HUMAN Keratin                           | 7  |                                                | NYSPPYNTIDDLK                           | 199  | 13 | 4  | 24.35 | b10°b10b11y10                       | 1605.77 | 62.633  | 5540  | 2 | 803.39  | 16.72  |
| P35527 K1C9_HUMAN Keratin                           | 8  |                                                | GGGGSFGYSYGGGSGGGSASSL<br>GGGFGGGSIR    | 63   | 32 | 4  | 16.76 | y10°y10y14y17                       | 2705.22 | 71.653  | 4280  | 5 | 541.85  | 21.93  |
| P35527 K1C9_HUMAN Keratin                           | 9  | Carbamidomethyl+C(2)                           | YCGQLQMIQEIQINLEAQITDVR                 | 404  | 23 | 7  | 23.01 | b4b13y4y7°y7y9*y9                   | 2737.31 | 111.419 | 4257  | 3 | 913.11  | -5.71  |
| P35527 K1C9_HUMAN Keratin                           | 10 |                                                | VQALEEANNDLENK                          | 170  | 14 | 4  | 23.71 | b3y10*y10y11                        | 1586.76 | 44.205  | 4033  | 2 | 793.88  | -2.23  |
| P35527 K1C9_HUMAN Keratin                           | 11 |                                                | FEMEQLNRQGV DADINGLR                    | 242  | 19 | 7  | 43.44 | b7b8°b8b9b11y8y10                   | 2205.10 | 72.828  | 28029 | 2 | 1103.06 | 14.06  |
| P35527 K1C9_HUMAN Keratin                           | 12 |                                                | QFSSSYLSRGGGGGGGLGSGGSI<br>R            | 4    | 25 | 10 | 44.1  | b4°b4b7b14°b14b17y12y1<br>3y15y23   | 2288.10 | 65.065  | 15239 | 3 | 763.37  | -1.39  |
| P35527 K1C9_HUMAN Keratin                           | 13 |                                                | HGVQELEIELQSQLSKK                       | 374  | 17 | 5  | 24.09 | b6°b6*b6b7b12                       | 1966.08 | 114.795 | 13613 | 3 | 656.03  | 10.00  |
| P35527 K1C9_HUMAN Keratin                           | 14 |                                                | GGGGRFSSSSYGGGSSR                       | 41   | 18 | 5  | 30.97 | b8b9b14y12y16                       | 1619.73 | 49.437  | 4958  | 2 | 810.37  | 7.76   |
| P35527 K1C9_HUMAN Keratin                           | 15 |                                                | GSRGGSGGSYGGGSGGGYGGG<br>SGSR           | 487  | 26 | 3  | 22.34 | y5y6y8                              | 2091.86 | 92.905  | 4596  | 4 | 523.72  | -13.07 |
| P35527 K1C9_HUMAN Keratin                           | 16 |                                                | STMQELNSRLASYLDK                        | 154  | 16 | 4  | 16.24 | b9b12y6°y6                          | 1855.90 | 71.037  | 4546  | 2 | 928.45  | -11.97 |
| P35527 K1C9_HUMAN Keratin                           | 17 |                                                | SGGGGGGLGSGGSIRSSYSR                    | 13   | 21 | 6  | 33.55 | b16b17y4y6°y6y12                    | 1812.87 | 63.851  | 2651  | 2 | 906.94  | 5.12   |
| P35527 K1C9_HUMAN Keratin                           | 18 |                                                | VQALEEANNDLENKIQDWDYDK                  | 170  | 21 | 5  | 23.54 | b8b13b14°b14y4                      | 2535.20 | 94.383  | 2649  | 3 | 845.74  | -1.54  |
| P35527 K1C9_HUMAN Keratin                           | 19 |                                                | GLGSGGSIR                               | 20   | 9  | 0  | 4.95  |                                     | 803.43  | 28.824  | 6863  | 2 | 402.22  | -10.10 |

|                                    |    |                      |                                    |     |    |    |       |                                                                                                                              |         |         |       |   |         |        |
|------------------------------------|----|----------------------|------------------------------------|-----|----|----|-------|------------------------------------------------------------------------------------------------------------------------------|---------|---------|-------|---|---------|--------|
| Q08043 ACTN3_HUMAN Alpha-actinin-3 | 1  | Carbamidomethyl+C(7) | EGLLLWCQR                          | 161 | 9  | 5  | 43.75 | b8y3y5y6y9                                                                                                                   | 1174.60 | 75.268  | 47346 | 2 | 587.80  | -1.87  |
| Q08043 ACTN3_HUMAN Alpha-actinin-3 | 2  |                      | HEAFESDLAAHQDR                     | 450 | 14 | 13 | 76.47 | b2b3 <sup>3</sup> b3b5b8b10y4y9*y9y10*y10y12y14                                                                              | 1625.72 | 35.568  | 28234 | 3 | 542.58  | -5.03  |
| Q08043 ACTN3_HUMAN Alpha-actinin-3 | 3  |                      | LMLLLEVISGER                       | 78  | 12 | 3  | 28.38 | y3y4y6                                                                                                                       | 1372.78 | 105.908 | 4821  | 2 | 686.90  | -1.69  |
| Q08043 ACTN3_HUMAN Alpha-actinin-3 | 4  |                      | AGTQIENIEEDFR                      | 61  | 13 | 6  | 43.53 | b4b5b7b12y7 <sup>6</sup> y7                                                                                                  | 1521.74 | 53.156  | 22712 | 3 | 507.92  | 16.53  |
| Q08043 ACTN3_HUMAN Alpha-actinin-3 | 5  |                      | GLSQEQLNEFR                        | 755 | 11 | 6  | 39.88 | b9*b9y7y8y9 <sup>9</sup> y9                                                                                                  | 1320.67 | 51.208  | 18147 | 2 | 660.84  | 8.60   |
| Q08043 ACTN3_HUMAN Alpha-actinin-3 | 6  |                      | LSHRPAFMPSEGK                      | 360 | 13 | 5  | 32.54 | b3 <sup>3</sup> b3y3y9y12                                                                                                    | 1456.75 | 54.465  | 16954 | 2 | 728.88  | 7.88   |
| Q08043 ACTN3_HUMAN Alpha-actinin-3 | 7  |                      | VEHIAALAQELNELDYHEAASVNSR          | 464 | 25 | 9  | 40.26 | b5b6b16y5 <sup>5</sup> y5*y5y9y10y12                                                                                         | 2779.34 | 70.996  | 13952 | 3 | 927.12  | -7.82  |
| Q08043 ACTN3_HUMAN Alpha-actinin-3 | 8  |                      | VLAVNQENEK                         | 278 | 10 | 4  | 32.71 | y4 <sup>4</sup> y4y8y9                                                                                                       | 1143.61 | 65.821  | 12961 | 1 | 1143.61 | 9.50   |
| Q08043 ACTN3_HUMAN Alpha-actinin-3 | 9  | Carbamidomethyl+C(1) | CQLEINFNTLQTK                      | 345 | 13 | 3  | 24.35 | b7y6y7                                                                                                                       | 1608.78 | 54.579  | 12255 | 2 | 804.89  | -16.16 |
| Q08043 ACTN3_HUMAN Alpha-actinin-3 | 10 |                      | GSGAPAGALDYVAFSSALYGESDL           | 877 | 24 | 6  | 30.57 | b5b9y4y10y12y22                                                                                                              | 2318.12 | 108.337 | 9015  | 3 | 773.38  | 16.11  |
| Q08043 ACTN3_HUMAN Alpha-actinin-3 | 11 |                      | QQEQNIINYK                         | 686 | 10 | 3  | 25.72 | b7y3y6                                                                                                                       | 1277.62 | 55.100  | 8988  | 2 | 639.31  | -20.73 |
| Q08043 ACTN3_HUMAN Alpha-actinin-3 | 12 |                      | VGEPSMSAMQR                        | 314 | 11 | 6  | 50.41 | b4b7b10y4y9 <sup>9</sup> y9                                                                                                  | 1192.52 | 91.629  | 8071  | 2 | 596.76  | -22.11 |
| Q08043 ACTN3_HUMAN Alpha-actinin-3 | 13 |                      | NVNVQNFHTSWK                       | 176 | 12 | 6  | 32.67 | b8y4y5 <sup>5</sup> y5y7*y7                                                                                                  | 1473.74 | 22.256  | 4201  | 3 | 491.92  | 8.61   |
| Q08043 ACTN3_HUMAN Alpha-actinin-3 | 14 |                      | QQVNER                             | 638 | 6  | 2  | 25.94 | b3y3                                                                                                                         | 773.39  | 116.641 | 3355  | 1 | 773.39  | -3.24  |
| Q08043 ACTN3_HUMAN Alpha-actinin-3 | 15 | Carbamidomethyl+C(2) | ACLISMGYDLGEVEFAR                  | 786 | 17 | 5  | 30.93 | b9b11b14y8y14                                                                                                                | 1930.91 | 96.518  | 3074  | 3 | 644.31  | 0.70   |
| Q08043 ACTN3_HUMAN Alpha-actinin-3 | 16 |                      | FAIQDISVEETSAK                     | 147 | 14 | 4  | 23.71 | b6*b6b7y5                                                                                                                    | 1537.75 | 57.889  | 2661  | 2 | 769.38  | -17.46 |
| Q08043 ACTN3_HUMAN Alpha-actinin-3 | 17 |                      | LAAGLAGSLEEPMAGLR                  | 669 | 17 | 5  | 37.33 | b10y3y6y9y16                                                                                                                 | 1686.87 | 61.997  | 2495  | 3 | 562.96  | -10.57 |
| Q08043 ACTN3_HUMAN Alpha-actinin-3 | 18 | Carbamidomethyl+C(5) | LVPSCDQTLQEELAR                    | 623 | 15 | 5  | 25.25 | b5b9*b9b12 <sup>2</sup> b12                                                                                                  | 1758.86 | 53.847  | 1866  | 2 | 879.93  | -4.09  |
| Q08043 ACTN3_HUMAN Alpha-actinin-3 | 19 | Carbamidomethyl+C(8) | AIMTYVSCFYHAFAGAEQAEAA<br>NR       | 250 | 25 | 9  | 64.49 | b6b11b12y5y7y8y9y11y12                                                                                                       | 2779.31 | 117.523 | 1858  | 4 | 695.58  | 18.27  |
| Q08043 ACTN3_HUMAN Alpha-actinin-3 | 20 |                      | TVPWLENRVGEPMSAMQR                 | 306 | 19 | 4  | 19.44 | b6b14y6y11                                                                                                                   | 2188.06 | 80.391  | 99951 | 3 | 730.03  | 0.45   |
| Q08043 ACTN3_HUMAN Alpha-actinin-3 | 21 | Carbamidomethyl+C(5) | LVPSCDQTLQEELARQQVNER              | 623 | 21 | 3  | 19.82 | b3b9b18                                                                                                                      | 2513.26 | 102.728 | 40407 | 3 | 838.42  | 6.02   |
| Q08043 ACTN3_HUMAN Alpha-actinin-3 | 22 |                      | LAAGLAGSLEEPMAGLRQQEQNI<br>NYK     | 669 | 27 | 3  | 11.49 | b3b12y10                                                                                                                     | 2945.50 | 116.558 | 24242 | 3 | 982.51  | -3.73  |
| Q08043 ACTN3_HUMAN Alpha-actinin-3 | 23 |                      | ASFNHFDRK                          | 766 | 9  | 3  | 29.25 | b4y6y8                                                                                                                       | 1121.55 | 49.522  | 7807  | 2 | 561.28  | 4.68   |
| Q08043 ACTN3_HUMAN Alpha-actinin-3 | 24 |                      | GKEEMLSQR                          | 425 | 9  | 3  | 29.25 | b7y4y5                                                                                                                       | 1077.55 | 47.208  | 7511  | 3 | 359.85  | 12.35  |
| Q08043 ACTN3_HUMAN Alpha-actinin-3 | 25 |                      | GLSQEQLNEFRASFNHFDR                | 755 | 19 | 4  | 14.15 | b5y6y11 <sup>11</sup> y11                                                                                                    | 2295.07 | 88.757  | 5791  | 2 | 1148.04 | -9.89  |
| Q08043 ACTN3_HUMAN Alpha-actinin-3 | 26 |                      | RQFAAQANAIGPWQAK                   | 646 | 17 | 6  | 24.8  | b3*b3b7b9*b9y13                                                                                                              | 1869.98 | 115.427 | 3490  | 3 | 624.00  | -14.75 |
| Q08043 ACTN3_HUMAN Alpha-actinin-3 | 27 |                      | RHEAFESDLAAHQDR                    | 449 | 15 | 3  | 25.25 | y3y10y12                                                                                                                     | 1781.85 | 57.587  | 2305  | 2 | 891.43  | 9.73   |
| Q08043 ACTN3_HUMAN Alpha-actinin-3 | 28 |                      | MVPYKGGSGAPAGALDYVAFSSAL<br>YGESDL | 872 | 29 | 15 | 52.4  | b7 <sup>7</sup> b7b10 <sup>10</sup> b10b12 <sup>12</sup> b12b18y3 <sup>3</sup> y3y4 <sup>4</sup> y4y7y8y14 <sup>14</sup> y14 | 2936.38 | 108.971 | 2287  | 5 | 588.08  | -7.65  |



|                                                    |    |                                                                              |                                |      |    |    |        |                                                    |         |         |         |   |         |        |
|----------------------------------------------------|----|------------------------------------------------------------------------------|--------------------------------|------|----|----|--------|----------------------------------------------------|---------|---------|---------|---|---------|--------|
| Q08043 ACTN3_HUMAN Alpha-actinin-3                 | 29 | Carbamidomethyl+C(1);<br>Carbamidomethyl+C(5)                                | CQAICDQWDNLGTLTQKR             | 489  | 18 | 3  | 23.67  | y11y13y14                                          | 2207.04 | 107.275 | 1506    | 3 | 736.35  | 4.98   |
| Q08043 ACTN3_HUMAN Alpha-actinin-3                 | 30 | Oxidation+M(4)                                                               | MMVMQPEGLGAGEGR                | 1    | 15 | 6  | 24.36  | b9b13y9y13°y13*y13                                 | 1578.73 | 72.829  | 15681   | 2 | 789.87  | 11.44  |
| P07205 PGK2_HUMAN Phosphoglycerate kinase 2        | 1  |                                                                              | LGDVYVNDAFGTAHR                | 156  | 15 | 8  | 66.4   | b3b4y3y5y6y11y14y15                                | 1634.79 | 57.193  | 43320   | 3 | 545.60  | -3.96  |
| P07205 PGK2_HUMAN Phosphoglycerate kinase 2        | 2  |                                                                              | FHVVEEGK                       | 123  | 8  | 7  | 47.56  | b6y2y4°y4y5y6y8                                    | 974.46  | 24.364  | 8749    | 2 | 487.73  | 4.32   |
| P07205 PGK2_HUMAN Phosphoglycerate kinase 2        | 3  |                                                                              | AVVLMSHLGRPDGVMPDK             | 56   | 19 | 7  | 42.07  | b17y3y4°y4y6y8y10                                  | 2019.03 | 71.025  | 487748  | 3 | 673.68  | -8.22  |
| P07205 PGK2_HUMAN Phosphoglycerate kinase 2        | 4  |                                                                              | AEPDK                          | 141  | 5  | 1  | 12.75  | b3                                                 | 559.28  | 35.420  | 7756    | 1 | 559.28  | 10.48  |
| P07205 PGK2_HUMAN Phosphoglycerate kinase 2        | 5  |                                                                              | ELDYFAKALENPVRPFLAILGGAK       | 192  | 24 | 5  | 26.93  | b3b6b10°b10b13                                     | 2632.43 | 51.886  | 1878    | 2 | 1316.72 | -7.23  |
| P07205 PGK2_HUMAN Phosphoglycerate kinase 2        | 6  | Carbamidomethyl+C(6);<br>Carbamidomethyl+C(18)<br>;Carbamidomethyl+C(19<br>) | ATSKGCITVIGGGDTATCCA           | 361  | 21 | 3  | 22.83  | b5b6b16                                            | 2128.00 | 105.863 | 1656    | 3 | 710.01  | 8.72   |
| P07205 PGK2_HUMAN Phosphoglycerate kinase 2        | 7  | Phosphoryl.STY()                                                             | VNEMIIGGGMAYFLK                | 230  | 16 | 5  | 26.27  | b3b11*b11b14y5                                     | 1823.83 | 70.327  | 3143    | 3 | 608.61  | -4.08  |
| P07205 PGK2_HUMAN Phosphoglycerate kinase 2        | 8  | Oxidation+M(3)                                                               | ALMDEIVK                       | 353  | 8  | 3  | 34.82  | b4y3y6                                             | 934.50  | 35.466  | 28554   | 2 | 467.75  | 3.98   |
| Q6S8J3 A26CA_HUMAN ANKRD26-like family C member 1A | 1  |                                                                              | AGFAGDDAPR                     | 718  | 10 | 14 | 110.94 | b2b3b4y1y2y3y4y5y6y7°y7y8y9y10                     | 976.44  | 29.683  | 2755233 | 2 | 488.73  | -4.69  |
| Q6S8J3 A26CA_HUMAN ANKRD26-like family C member 1A | 2  |                                                                              | AVFPSIVGRPR                    | 728  | 11 | 14 | 120.16 | b2b3b9y1y2y3y4y5y6y7y8°y8y9y10                     | 1198.70 | 55.035  | 962517  | 2 | 599.85  | -4.38  |
| Q6S8J3 A26CA_HUMAN ANKRD26-like family C member 1A | 3  |                                                                              | QEYDESGPSIVHRK                 | 1059 | 14 | 19 | 134.71 | b3°b3*b3b14y2y3y4y5y6°y6y7y8y9y10°y10y11y12y14*y14 | 1644.79 | 30.678  | 465849  | 3 | 548.93  | -7.27  |
| Q6S8J3 A26CA_HUMAN ANKRD26-like family C member 1A | 4  |                                                                              | QEYDESGPSIVHR                  | 1059 | 13 | 12 | 89.81  | y1y2y3y4y5y6y8y10°y10y11y13*y13                    | 1516.69 | 36.606  | 191103  | 3 | 506.24  | -8.05  |
| Q6S8J3 A26CA_HUMAN ANKRD26-like family C member 1A | 5  |                                                                              | FTTMAER                        | 899  | 7  | 11 | 51.88  | b1b4°b4b5°b5b7y2°y2y5y6y7                          | 855.41  | 28.720  | 6832    | 2 | 428.21  | 5.28   |
| Q6S8J3 A26CA_HUMAN ANKRD26-like family C member 1A | 6  | Carbamidomethyl+C(2)                                                         | LCYVALDFEQEMATAASSSLEK         | 915  | 23 | 6  | 23.01  | b4b12b14y7y14°y14                                  | 2550.19 | 96.330  | 3242    | 3 | 850.73  | 5.07   |
| Q6S8J3 A26CA_HUMAN ANKRD26-like family C member 1A | 7  |                                                                              | VVEVDSMPAASSVK                 | 1    | 14 | 3  | 26.05  | b9b11b12                                           | 1418.73 | 49.226  | 151634  | 2 | 709.87  | 10.24  |
| Q6S8J3 A26CA_HUMAN ANKRD26-like family C member 1A | 8  |                                                                              | VAPEEHPILLTEAPLNPK             | 795  | 18 | 5  | 31.27  | b5b6b9°b9b13                                       | 1968.05 | 60.297  | 29371   | 3 | 656.69  | -13.52 |
| Q6S8J3 A26CA_HUMAN ANKRD26-like family C member 1A | 9  |                                                                              | MVVEVDSMPAASSVK                | 0    | 15 | 3  | 17.17  | b12y10y13                                          | 1549.75 | 68.123  | 8013    | 2 | 775.38  | -8.19  |
| Q6S8J3 A26CA_HUMAN ANKRD26-like family C member 1A | 10 |                                                                              | TTGIVMDSGDGVTHTVPIYEGNALPHATLR | 847  | 30 | 4  | 23.58  | b5b8b13b15                                         | 3122.55 | 100.114 | 6768    | 4 | 781.39  | -1.95  |
| Q6S8J3 A26CA_HUMAN ANKRD26-like family C member 1A | 11 | Carbamidomethyl+C(1);<br>Carbamidomethyl+C(9);<br>Carbamidomethyl+C(16)      | CPEALFQPCFLGMESCGIHETTFSIMK    | 956  | 28 | 5  | 16.47  | b6b8b14°b14y10                                     | 3304.48 | 76.291  | 5103    | 4 | 826.87  | 4.80   |

|                                                    |    |                                                                               |                                 |     |    |   |       |                      |         |         |       |   |         |        |
|----------------------------------------------------|----|-------------------------------------------------------------------------------|---------------------------------|-----|----|---|-------|----------------------|---------|---------|-------|---|---------|--------|
| Q6S8J3 A26CA_HUMAN ANKRD26-like family C member 1A | 12 |                                                                               | DLYTNTVLSGGTTMYPGMAHR           | 991 | 21 | 3 | 13.18 | b6y8y11              | 2285.06 | 114.704 | 5069  | 3 | 762.36  | -4.06  |
| Q6S8J3 A26CA_HUMAN ANKRD26-like family C member 1A | 13 | Carbamidomethyl+C(9)                                                          | MNSELSLSCK                      | 629 | 10 | 4 | 25.72 | b6y5y7°y7            | 1168.55 | 22.252  | 4881  | 2 | 584.78  | 15.57  |
| Q6S8J3 A26CA_HUMAN ANKRD26-like family C member 1A | 14 | Carbamidomethyl+C(25)                                                         | ALQLNELTMDDDTAVLVIDNGSG MCK     | 692 | 26 | 4 | 22.34 | b3b12b13°b13         | 2823.29 | 72.253  | 4312  | 3 | 941.77  | -10.46 |
| Q6S8J3 A26CA_HUMAN ANKRD26-like family C member 1A | 15 |                                                                               | ELENFMAIEEMK                    | 531 | 12 | 3 | 28.38 | b3b6b7               | 1483.71 | 59.019  | 3350  | 2 | 742.36  | 21.80  |
| Q6S8J3 A26CA_HUMAN ANKRD26-like family C member 1A | 16 |                                                                               | ESGK                            | 36  | 4  | 1 | 12.3  | b3                   | 420.21  | 21.584  | 2490  | 1 | 420.21  | 13.36  |
| Q6S8J3 A26CA_HUMAN ANKRD26-like family C member 1A | 17 |                                                                               | ELENFMAIEEMKK                   | 531 | 13 | 4 | 19.58 | b4°b4y9y11           | 1611.78 | 79.320  | 64013 | 2 | 806.40  | 5.38   |
| Q6S8J3 A26CA_HUMAN ANKRD26-like family C member 1A | 18 |                                                                               | EEIAMLRLLEDTMK                  | 652 | 14 | 3 | 26.85 | y3y5y7               | 1691.87 | 75.880  | 20851 | 2 | 846.44  | -0.79  |
| Q6S8J3 A26CA_HUMAN ANKRD26-like family C member 1A | 19 |                                                                               | GSENSQPEKMSQELEINK              | 391 | 18 | 4 | 21.91 | y4y7°y7y11           | 2047.95 | 62.861  | 16039 | 3 | 683.32  | -4.47  |
| Q6S8J3 A26CA_HUMAN ANKRD26-like family C member 1A | 20 |                                                                               | KHGSTHVGFPELNTNGATAGNGD DGLIPPR | 543 | 30 | 3 | 22.44 | b6b7b13              | 3029.46 | 111.703 | 15878 | 3 | 1010.49 | -8.62  |
| Q6S8J3 A26CA_HUMAN ANKRD26-like family C member 1A | 21 |                                                                               | MSQELEINKDGDR                   | 400 | 13 | 3 | 19.58 | b3b10y10             | 1534.72 | 73.786  | 13933 | 3 | 512.24  | 0.80   |
| Q6S8J3 A26CA_HUMAN ANKRD26-like family C member 1A | 22 |                                                                               | ANLNALDRYGR                     | 295 | 11 | 4 | 39.88 | b8y3y4y5             | 1262.64 | 55.136  | 12783 | 2 | 631.83  | -12.37 |
| Q6S8J3 A26CA_HUMAN ANKRD26-like family C member 1A | 23 |                                                                               | SNVGASGDHDDSAMKTLR              | 77  | 18 | 4 | 37.29 | y10y12y13y14         | 1860.83 | 75.400  | 8080  | 3 | 620.95  | -12.99 |
| Q6S8J3 A26CA_HUMAN ANKRD26-like family C member 1A | 24 | Carbamidomethyl+C(2)                                                          | ICELLSDYKEK                     | 470 | 11 | 3 | 26.17 | b4y6y7               | 1397.69 | 62.066  | 5938  | 2 | 699.35  | -7.07  |
| Q6S8J3 A26CA_HUMAN ANKRD26-like family C member 1A | 25 | Carbamidomethyl+C(3);<br>Carbamidomethyl+C(11);<br>Carbamidomethyl+C(18)<br>) | FRCPEALFQPCFLGMESCGIHETTF NSIMK | 954 | 30 | 5 | 23.52 | b3b8b9y9y13          | 3607.61 | 73.800  | 4854  | 3 | 1203.21 | -5.82  |
| Q6S8J3 A26CA_HUMAN ANKRD26-like family C member 1A | 26 |                                                                               | QMPKYSENSNPEQDLK                | 481 | 17 | 5 | 22.43 | b9y9*y9y10°y10       | 1994.93 | 101.478 | 4306  | 2 | 997.97  | 7.65   |
| Q6S8J3 A26CA_HUMAN ANKRD26-like family C member 1A | 27 | Carbamidomethyl+C(12)                                                         | EYAVSSHHVICQLLSDYKEK            | 342 | 21 | 3 | 21.63 | b3y5y6               | 2543.20 | 116.227 | 3449  | 3 | 848.40  | -14.11 |
| Q6S8J3 A26CA_HUMAN ANKRD26-like family C member 1A | 28 |                                                                               | GSENGQPEKR                      | 509 | 10 | 5 | 27.48 | b8y5y6°y6*y6         | 1101.53 | 26.316  | 3059  | 2 | 551.27  | 0.11   |
| Q6S8J3 A26CA_HUMAN ANKRD26-like family C member 1A | 29 |                                                                               | KDLYTNTVLSGGTTMYPGMAHR          | 990 | 22 | 3 | 12.79 | b6b13y5              | 2413.15 | 114.407 | 2987  | 3 | 805.06  | -3.84  |
| Q6S8J3 A26CA_HUMAN ANKRD26-like family C member 1A | 30 |                                                                               | ESGKSNVGTSGDHDDSAMK             | 36  | 19 | 8 | 27.68 | b7*b7b9b11°b11*y1y10 | 1921.84 | 44.959  | 2251  | 2 | 961.42  | 8.83   |

|                                                    |    |                                                      |                                                              |     |    |    |       |                                         |         |         |       |   |         |        |
|----------------------------------------------------|----|------------------------------------------------------|--------------------------------------------------------------|-----|----|----|-------|-----------------------------------------|---------|---------|-------|---|---------|--------|
| Q6S8J3 A26CA_HUMAN ANKRD26-like family C member 1A | 31 |                                                      | LTSEESQRLK                                                   | 498 | 11 | 4  | 23.16 | b3b10y7*y7                              | 1319.67 | 114.296 | 1959  | 1 | 1319.67 | -6.57  |
| Q6S8J3 A26CA_HUMAN ANKRD26-like family C member 1A | 32 |                                                      | EVEEEMKK                                                     | 413 | 8  | 5  | 49.32 | b3°b3b6y6y7                             | 1021.48 | 25.277  | 1521  | 2 | 511.24  | -5.62  |
| Q6S8J3 A26CA_HUMAN ANKRD26-like family C member 1A | 33 | Phosphoryl.STY()                                     | HESNNVGLLENLTNGVTAGNGD<br>NGLIPQR                            | 421 | 29 | 8  | 34.08 | b7_H3PO4<br>b7b9b12b14b21°b21y10y1<br>3 | 3083.43 | 107.180 | 5077  | 4 | 771.61  | -5.23  |
| Q6S8J3 A26CA_HUMAN ANKRD26-like family C member 1A | 34 | Phosphoryl STY(7)                                    | DVLHENSTLREEIAMLR                                            | 642 | 17 | 3  | 15.44 | b6b10y12                                | 2106.00 | 82.508  | 2104  | 2 | 1053.50 | 0.58   |
| Q6S8J3 A26CA_HUMAN ANKRD26-like family C member 1A | 35 | Phosphoryl STY(13)                                   | HGSTHVGFPENLTNGATAGNGDD<br>GLIPPRK                           | 544 | 30 | 3  | 11.09 | b8b11y16                                | 3109.45 | 90.356  | 2088  | 3 | 1037.15 | 3.22   |
| Q6S8J3 A26CA_HUMAN ANKRD26-like family C member 1A | 36 | Oxidation+M(1)                                       | MTQIMFETFNTPAMYVAIQAVPSL<br>YTSGR                            | 818 | 29 | 3  | 11.2  | b4y5y19                                 | 3283.62 | 77.061  | 93551 | 4 | 821.66  | 12.57  |
| Q6S8J3 A26CA_HUMAN ANKRD26-like family C member 1A | 37 | Carbamidomethyl+C(25)<br>;Oxidation+M()              | ALQLNELTMDDDTAVLVIDNGSG<br>MCK                               | 692 | 26 | 3  | 11.67 | b14b23y11                               | 2839.34 | 85.309  | 42554 | 4 | 710.59  | 7.91   |
| Q6S8J3 A26CA_HUMAN ANKRD26-like family C member 1A | 38 | Oxidation+M()                                        | DGDRELENFMAIEEMK                                             | 527 | 16 | 6  | 46.44 | b11b13y3y6y8y10                         | 1942.87 | 59.121  | 6556  | 2 | 971.94  | 8.98   |
| Q6S8J3 A26CA_HUMAN ANKRD26-like family C member 1A | 39 |                                                      | FTTMAER                                                      | 899 | 7  | 0  | 0.9   |                                         | 837.39  | 28.766  | 2689  | 2 | 419.20  | -3.13  |
| Q13418 ILK_HUMAN Integrin-linked protein kinase    | 1  | Carbamidomethyl+C(19)                                | VALEGLRPTIPPGISPHVCK                                         | 403 | 20 | 3  | 21.76 | b10y8y9                                 | 2141.17 | 64.536  | 79298 | 4 | 536.05  | -9.92  |
| Q13418 ILK_HUMAN Integrin-linked protein kinase    | 2  | Carbamidomethyl+C(14)                                | IFSHPNVLPVLGACQSPAPHTLI<br>THWMPYGSLYNVLHEGTNFFVVD<br>QSQAVK | 243 | 53 | 12 | 34.35 | b4b5b8b12b16y4*y4y6*y6<br>y7y13y37      | 5863.87 | 100.179 | 68716 | 6 | 978.15  | -14.41 |
| Q13418 ILK_HUMAN Integrin-linked protein kinase    | 3  |                                                      | FDMIVPILEK                                                   | 438 | 10 | 5  | 41.47 | b2b3y5y6y7                              | 1204.66 | 87.719  | 64137 | 2 | 602.83  | -4.36  |
| Q13418 ILK_HUMAN Integrin-linked protein kinase    | 4  |                                                      | YGEMPVDK                                                     | 131 | 8  | 6  | 34.82 | b2b3b5y1y2y4                            | 938.43  | 33.358  | 36299 | 2 | 469.72  | 3.84   |
| Q13418 ILK_HUMAN Integrin-linked protein kinase    | 5  | Carbamidomethyl+C(25)                                | LWLDNTENDLNQGGDDHGFSPHLH<br>WACR                             | 17  | 26 | 6  | 21.87 | b2b15y3y4y13y26                         | 3110.39 | 81.160  | 19517 | 3 | 1037.47 | 3.92   |
| Q13418 ILK_HUMAN Integrin-linked protein kinase    | 6  | Carbamidomethyl+C(18)<br>;Carbamidomethyl+C(39)<br>) | ADINAVNEHGNVPLHYACFWGQ<br>DQVAEDLVANGALVSICNK                | 90  | 41 | 5  | 21.67 | b3b13y3y5y6                             | 4509.14 | 89.464  | 17701 | 4 | 1128.04 | 0.65   |
| Q13418 ILK_HUMAN Integrin-linked protein kinase    | 7  |                                                      | EVPFADLSNMEIGMK                                              | 388 | 15 | 4  | 28    | b5y6y11y13                              | 1680.81 | 83.678  | 31004 | 2 | 840.91  | 8.79   |
| Q13418 ILK_HUMAN Integrin-linked protein kinase    | 8  |                                                      | LLQYK                                                        | 85  | 5  | 2  | 12.75 | y4*y4                                   | 664.41  | 37.955  | 5640  | 1 | 664.41  | 4.13   |
| Q13418 ILK_HUMAN Integrin-linked protein kinase    | 9  |                                                      | MYAPAWVAPEALQK                                               | 349 | 14 | 4  | 29.26 | b7b10b11y9                              | 1574.79 | 51.209  | 4738  | 2 | 787.90  | -7.52  |
| Q13418 ILK_HUMAN Integrin-linked protein kinase    | 10 |                                                      | GDDTPLHLAASHGHR                                              | 65  | 15 | 3  | 23.19 | b9y5y6                                  | 1583.74 | 31.225  | 3775  | 2 | 792.37  | -18.50 |
| Q13418 ILK_HUMAN Integrin-linked protein kinase    | 11 |                                                      | MGQNLNR                                                      | 154 | 7  | 3  | 39.14 | b4b6y3                                  | 832.40  | 92.851  | 2136  | 1 | 832.40  | -17.08 |
| Q13418 ILK_HUMAN Integrin-linked protein kinase    | 12 |                                                      | INVMNR                                                       | 59  | 6  | 1  | 13.2  | y5                                      | 746.40  | 30.017  | 1948  | 1 | 746.40  | 8.34   |
| Q13418 ILK_HUMAN Integrin-linked protein kinase    | 13 | Carbamidomethyl+C(34)                                | EVPFADLSNMEIGMKVALEGLRP<br>TIPPGISPHVCK                      | 388 | 35 | 6  | 26.03 | b4b10b18y9y10y17                        | 3802.95 | 115.464 | 28888 | 4 | 951.49  | -3.79  |
| Q13418 ILK_HUMAN Integrin-linked protein kinase    | 14 |                                                      | SVMIDEDMTARISMADVK                                           | 323 | 18 | 3  | 14.75 | b5b13y5                                 | 2011.97 | 65.075  | 13025 | 3 | 671.33  | 8.25   |
| Q13418 ILK_HUMAN Integrin-linked protein kinase    | 15 |                                                      | INVMNRGDDTPLHLAASHGHR                                        | 59  | 21 | 5  | 20.53 | b4y5y10y13°y13                          | 2311.14 | 111.409 | 3335  | 3 | 771.05  | -3.17  |

|                                                        |    |                       |                             |     |    |    |       |                               |         |         |       |   |         |        |
|--------------------------------------------------------|----|-----------------------|-----------------------------|-----|----|----|-------|-------------------------------|---------|---------|-------|---|---------|--------|
| Q13418 ILK_HUMAN Integrin-linked protein kinase        | 16 |                       | HALNSRSVMIDEDMTAR           | 317 | 17 | 5  | 21.57 | b3b8°b8y6y11                  | 1945.94 | 44.219  | 3241  | 3 | 649.32  | 9.60   |
| Q13418 ILK_HUMAN Integrin-linked protein kinase        | 17 | Phosphoryl STY(7)     | GMAFLHTLEPLIPR              | 303 | 14 | 4  | 26.09 | b5b11y6y10                    | 1674.84 | 68.906  | 2985  | 3 | 558.95  | 1.38   |
| Q13418 ILK_HUMAN Integrin-linked protein kinase        | 18 | Oxidation+M(10)       | EVPFADLSNMEIGMK             | 388 | 15 | 6  | 46.01 | b7b10b12y5y10y14              | 1696.80 | 70.079  | 16051 | 3 | 566.27  | 2.09   |
| Q13418 ILK_HUMAN Integrin-linked protein kinase        | 19 | Oxidation+M(1)        | MYAPAWVAPEALQKKPEDTNR       | 349 | 21 | 3  | 13.18 | b12y11y14                     | 2431.23 | 104.883 | 5520  | 3 | 811.08  | 9.94   |
| P13645 K1C10_HUMAN Keratin                             | 1  |                       | LENEIQTYR                   | 441 | 9  | 4  | 52.78 | y4y6y7y8                      | 1165.59 | 39.090  | 19780 | 2 | 583.30  | 3.04   |
| P13645 K1C10_HUMAN Keratin                             | 2  | Carbamidomethyl+C(2)  | YCVQLSQQAQISALEEQLQQR       | 399 | 23 | 12 | 61.08 | b2b3b4b5b9°b12b22y4y5y8y11y23 | 2746.42 | 111.472 | 15913 | 3 | 916.15  | 1.07   |
| P13645 K1C10_HUMAN Keratin                             | 3  | Carbamidomethyl+C(7)  | GSSGGGCFGGSSGGYGGLGGFGGGSFR | 59  | 27 | 5  | 16.88 | b5y3y6y9y27                   | 2343.01 | 68.857  | 3374  | 2 | 1172.01 | 13.03  |
| P13645 K1C10_HUMAN Keratin                             | 4  |                       | NVSTGDVNVEMNAAPGVDLTQLLNNMR | 295 | 27 | 3  | 11.49 | b4b8y5                        | 2872.37 | 97.941  | 3354  | 3 | 958.13  | -6.97  |
| P13645 K1C10_HUMAN Keratin                             | 5  |                       | DAEAWFNEK                   | 334 | 9  | 4  | 29.25 | b4y5y7°y7                     | 1109.51 | 83.784  | 7546  | 2 | 555.26  | 13.86  |
| P13645 K1C10_HUMAN Keratin                             | 6  |                       | VTMQNLNDR                   | 147 | 9  | 3  | 29.25 | b5y3y8                        | 1090.52 | 57.921  | 4824  | 2 | 545.76  | -11.53 |
| P13645 K1C10_HUMAN Keratin                             | 7  |                       | HYSSSR                      | 9   | 6  | 3  | 25.94 | b3b4°b4                       | 736.34  | 86.243  | 2755  | 1 | 736.34  | 0.17   |
| P13645 K1C10_HUMAN Keratin                             | 8  |                       | SQYEQLAEQNR                 | 322 | 11 | 6  | 33.68 | b3b6°b6y7y9°y9                | 1365.66 | 51.218  | 1853  | 2 | 683.33  | 14.48  |
| P13645 K1C10_HUMAN Keratin                             | 9  |                       | ELTTEIDNNIEQISSYK           | 345 | 17 | 5  | 24.8  | b4b8°b8b10y12                 | 1996.98 | 67.386  | 1538  | 2 | 998.99  | 3.06   |
| P13645 K1C10_HUMAN Keratin                             | 10 |                       | LENEIQTYRSLLEGEFGSSGGGGR    | 441 | 23 | 10 | 47.36 | b3b6°b6b7°b7b11y5y8y12y15     | 2409.15 | 73.832  | 30432 | 3 | 803.72  | -6.28  |
| P13645 K1C10_HUMAN Keratin                             | 11 |                       | VRALEESNYELEGK              | 163 | 14 | 4  | 29.26 | b11y7y11y12                   | 1636.82 | 93.964  | 10929 | 3 | 546.28  | 1.72   |
| P13645 K1C10_HUMAN Keratin                             | 12 |                       | ISSKGSGLGGFSSGGFSGGSFSR     | 35  | 24 | 4  | 18.46 | y6y12°y12y17                  | 2210.03 | 80.379  | 6283  | 3 | 737.35  | -6.85  |
| P13645 K1C10_HUMAN Keratin                             | 13 |                       | SVRYSSSK                    | 1   | 8  | 6  | 60.31 | b7y3y5y6y7°y7                 | 913.46  | 102.443 | 4864  | 1 | 913.46  | -9.82  |
| P13645 K1C10_HUMAN Keratin                             | 14 |                       | SQYEQLAEQNRK                | 322 | 12 | 5  | 47.64 | b3y5y6y7y10                   | 1493.72 | 29.403  | 2918  | 3 | 498.58  | -6.46  |
| P13645 K1C10_HUMAN Keratin                             | 15 |                       | HGNSHQGEPRDYK               | 184 | 14 | 4  | 26.05 | y4y5y9°y9                     | 1611.71 | 88.512  | 2917  | 2 | 806.36  | -10.91 |
| P13645 K1C10_HUMAN Keratin                             | 16 |                       | ELTTEIDNNIEQISSYKSEITELR    | 345 | 24 | 3  | 18.46 | b7b12b21                      | 2825.39 | 82.791  | 2645  | 2 | 1413.20 | -3.97  |
| P13645 K1C10_HUMAN Keratin                             | 17 | Carbamidomethyl+C(10) | SGGGGGGGGGCGGGGVSSLRSSSK    | 15  | 25 | 7  | 21.28 | b4°b4b20y4°y4y18y20           | 2051.98 | 71.018  | 2553  | 4 | 513.75  | 13.80  |
| P13645 K1C10_HUMAN Keratin                             | 18 | Carbamidomethyl+C(16) | HYSSRSGGGGGGGGCGGGGVSSLR    | 9   | 26 | 5  | 17.34 | b15y3y12y20°y20               | 2267.00 | 89.692  | 2186  | 3 | 756.34  | 1.72   |
| Q9H892 TTC12_HUMAN Tetratricopeptide repeat protein 12 | 1  |                       | AVLETEKR                    | 36  | 8  | 9  | 46.31 | b1b2b5b6y2y5y6°y6y8           | 945.54  | 25.330  | 12086 | 2 | 473.27  | 2.90   |
| Q9H892 TTC12_HUMAN Tetratricopeptide repeat protein 12 | 2  |                       | SAEEINSEAFLASVEKDAKER       | 74  | 21 | 3  | 13.18 | b3b15y5                       | 2323.12 | 61.284  | 4424  | 3 | 775.05  | -7.04  |
| Q9H892 TTC12_HUMAN Tetratricopeptide repeat protein 12 | 3  |                       | NVDEISNLIQEMNSDDPVVQQK      | 14  | 22 | 6  | 25.8  | b6°b6b13y8y9°y9               | 2515.19 | 71.807  | 3549  | 4 | 629.55  | -4.37  |
| Q9H892 TTC12_HUMAN Tetratricopeptide repeat protein 12 | 4  |                       | SAEEINSEAFLASVEK            | 74  | 16 | 5  | 22.87 | b12°b12b14y5y10               | 1723.87 | 83.528  | 82921 | 3 | 575.29  | 15.37  |
| Q9H892 TTC12_HUMAN Tetratricopeptide repeat protein 12 | 5  |                       | LSVMMK                      | 606 | 6  | 2  | 25.94 | y3y4                          | 708.38  | 46.002  | 23634 | 2 | 354.69  | -2.41  |
| Q9H892 TTC12_HUMAN Tetratricopeptide repeat protein 12 | 6  |                       | GYLNQVDLQEK                 | 212 | 11 | 3  | 23.16 | b10y3y6                       | 1306.66 | 52.451  | 9595  | 3 | 436.23  | -2.06  |
| Q9H892 TTC12_HUMAN Tetratricopeptide repeat protein 12 | 7  |                       | EAHELLDSGK                  | 229 | 10 | 4  | 25.72 | b3b6°b6y4                     | 1098.53 | 22.236  | 5655  | 3 | 366.85  | -11.56 |
| Q9H892 TTC12_HUMAN Tetratricopeptide repeat protein 12 | 8  |                       | ADLQEK                      | 223 | 6  | 1  | 13.2  | y5                            | 703.35  | 55.171  | 5135  | 1 | 703.35  | -10.67 |
| Q9H892 TTC12_HUMAN Tetratricopeptide repeat protein 12 | 9  | Carbamidomethyl+C(5)  | ALVDCEWALK                  | 158 | 10 | 3  | 27.48 | b7b8y8                        | 1204.59 | 34.548  | 5006  | 2 | 602.80  | -11.65 |
| Q9H892 TTC12_HUMAN Tetratricopeptide repeat protein 12 | 10 |                       | LAGSDTQK                    | 653 | 8  | 5  | 34.82 | b4b7°b7y4*y4                  | 819.44  | 49.594  | 4251  | 2 | 410.22  | 21.30  |
| Q9H892 TTC12_HUMAN Tetratricopeptide repeat protein 12 | 11 | Carbamidomethyl+C(5)  | ILAICTNSYHEAR               | 584 | 13 | 6  | 32.54 | b11°b11*b11y4y9y11            | 1547.76 | 58.529  | 4043  | 3 | 516.59  | -4.81  |
| Q9H892 TTC12_HUMAN Tetratricopeptide repeat protein 12 | 12 |                       | TMISPPQTALK                 | 63  | 11 | 3  | 23.16 | b6b9y4                        | 1186.64 | 28.672  | 2884  | 3 | 396.22  | -8.23  |

|                                                           |    |                                                                    |                          |      |    |    |        |                                                    |         |         |         |   |         |        |
|-----------------------------------------------------------|----|--------------------------------------------------------------------|--------------------------|------|----|----|--------|----------------------------------------------------|---------|---------|---------|---|---------|--------|
| Q9H892 TTC12_HUMAN<br>Tetratricopeptide repeat protein 12 | 13 | Carbamidomethyl+C(8);<br>Carbamidomethyl+C(10)                     | VSSSSALCQCIAIMGNLSAEPTR  | 441  | 24 | 7  | 26.08  | b4°b4b13y8y9*y9y14                                 | 2553.19 | 96.259  | 1929    | 2 | 1277.10 | -9.85  |
| Q9H892 TTC12_HUMAN<br>Tetratricopeptide repeat protein 12 | 14 |                                                                    | DMKVLYTNR                | 137  | 9  | 4  | 29.25  | b5b7y4*y4                                          | 1139.58 | 29.523  | 7329    | 2 | 570.29  | -9.64  |
| Q9H892 TTC12_HUMAN<br>Tetratricopeptide repeat protein 12 | 15 | Carbamidomethyl+C(6)                                               | LWQAVCSRNEENQR           | 319  | 14 | 4  | 18.27  | b9b11y11*y11                                       | 1789.82 | 95.087  | 2692    | 2 | 895.41  | -10.50 |
| Q9H892 TTC12_HUMAN<br>Tetratricopeptide repeat protein 12 | 16 | Carbamidomethyl+C(5);<br>Carbamidomethyl+C(11)                     | ALVDCEWALKCDEK           | 158  | 14 | 3  | 18.27  | b9b13y8                                            | 1736.78 | 96.428  | 2082    | 3 | 579.60  | -12.16 |
| Q9H892 TTC12_HUMAN<br>Tetratricopeptide repeat protein 12 | 17 | Carbamidomethyl+C(8);<br>Carbamidomethyl+C(10)<br>;Oxidation+M(14) | VSSSSALCQCIAIMGNLSAEPTR  | 441  | 24 | 11 | 49.62  | b6°b6b16*b16b17y5°y5y6y7°y7y14                     | 2569.22 | 99.001  | 1999    | 2 | 1285.11 | 6.46   |
| A5A3E0 A26CB_HUMAN ANKRD26-<br>like family C member 1B    | 1  |                                                                    | AGFAGDDAPR               | 718  | 10 | 14 | 110.94 | b2b3b4y1y2y3y4y5y6y7°y7y8y9y10                     | 976.44  | 29.683  | 2755233 | 2 | 488.73  | -4.69  |
| A5A3E0 A26CB_HUMAN ANKRD26-<br>like family C member 1B    | 2  |                                                                    | AVFPSIVGRPR              | 728  | 11 | 14 | 120.16 | b2b3b9y1y2y3y4y5y6y7y8°y8y9y10                     | 1198.70 | 55.035  | 962517  | 2 | 599.85  | -4.38  |
| A5A3E0 A26CB_HUMAN ANKRD26-<br>like family C member 1B    | 3  |                                                                    | QEYDESGPSIVHRK           | 1059 | 14 | 19 | 134.71 | b3°b3*b3b14y2y3y4y5y6°y6y7y8y9y10°y10y11y12y14*y14 | 1644.79 | 30.678  | 465849  | 3 | 548.93  | -7.27  |
| A5A3E0 A26CB_HUMAN ANKRD26-<br>like family C member 1B    | 4  |                                                                    | QEYDESGPSIVHR            | 1059 | 13 | 12 | 89.81  | y1y2y3y4y5y6y8y10°y10y11y13*y13                    | 1516.69 | 36.606  | 191103  | 3 | 506.24  | -8.05  |
| A5A3E0 A26CB_HUMAN ANKRD26-<br>like family C member 1B    | 5  |                                                                    | FTTMAER                  | 899  | 7  | 11 | 51.88  | b1b4°b4b5°b5b7y2°y2y5y6y7                          | 855.41  | 28.720  | 6832    | 2 | 428.21  | 5.28   |
| A5A3E0 A26CB_HUMAN ANKRD26-<br>like family C member 1B    | 6  | Carbamidomethyl+C(2)                                               | LCYVALDFEQEMATVASSSLEK   | 915  | 23 | 4  | 25.44  | b9b10y6y13                                         | 2578.18 | 56.124  | 41168   | 3 | 860.07  | -7.95  |
| A5A3E0 A26CB_HUMAN ANKRD26-<br>like family C member 1B    | 7  |                                                                    | ISSENSNPEQDLK            | 367  | 13 | 4  | 19.58  | b4°b4y4y9                                          | 1460.72 | 42.542  | 3171    | 3 | 487.58  | 20.39  |
| A5A3E0 A26CB_HUMAN ANKRD26-<br>like family C member 1B    | 8  |                                                                    | AAWWGK                   | 145  | 6  | 1  | 13.2   | b4                                                 | 718.38  | 79.252  | 1951    | 2 | 359.69  | 12.49  |
| A5A3E0 A26CB_HUMAN ANKRD26-<br>like family C member 1B    | 9  | Carbamidomethyl+C(4)                                               | EKLCYVALDFEQEMATVASSSLEK | 913  | 25 | 5  | 22.11  | b6°b6y5y7y8                                        | 2835.33 | 75.506  | 4313    | 3 | 945.78  | -6.03  |
| A5A3E0 A26CB_HUMAN ANKRD26-<br>like family C member 1B    | 10 |                                                                    | ISSENSNPEQDLKLTSEESQR    | 367  | 22 | 5  | 25.8   | b9b18y3*y3y4                                       | 2520.20 | 106.405 | 1515    | 2 | 1260.60 | 12.88  |
| A5A3E0 A26CB_HUMAN ANKRD26-<br>like family C member 1B    | 11 | Phosphoryl STY(11)                                                 | KEKDILHENSTLR            | 639  | 13 | 6  | 44.11  | b9b10°b10y3y9y10                                   | 1662.79 | 61.970  | 8555    | 2 | 831.90  | -10.57 |
| A5A3E0 A26CB_HUMAN ANKRD26-<br>like family C member 1B    | 12 | Phosphoryl STY()                                                   | YSVWVGGSILASLSTFQQMWISK  | 1036 | 23 | 5  | 23.01  | b7b17y7y10y13                                      | 2668.25 | 74.272  | 2083    | 3 | 890.09  | -12.35 |
| A5A3E0 A26CB_HUMAN ANKRD26-<br>like family C member 1B    | 13 | Oxidation+M()                                                      | ELPDYLMK                 | 883  | 8  | 5  | 47.56  | b4°b4b6b7y5                                        | 1024.49 | 78.757  | 9338    | 1 | 1024.49 | -7.03  |
| A5A3E0 A26CB_HUMAN ANKRD26-<br>like family C member 1B    | 14 | Carbamidomethyl+C(2);<br>Oxidation+M(12)                           | LCYVALDFEQEMATVASSSLEK   | 915  | 23 | 8  | 59.58  | b3b4b5b7°b7b8b12b22                                | 2594.17 | 91.555  | 7441    | 2 | 1297.59 | -11.67 |
| A5A3E0 A26CB_HUMAN ANKRD26-<br>like family C member 1B    | 15 | Oxidation+M()                                                      | ELENFMAIEEMKK            | 531  | 13 | 4  | 19.58  | b3°b3b6y10                                         | 1627.78 | 88.700  | 2013    | 2 | 814.39  | 5.85   |

|                                                    |    |                                            |                                    |     |    |    |       |                              |         |         |        |   |         |        |
|----------------------------------------------------|----|--------------------------------------------|------------------------------------|-----|----|----|-------|------------------------------|---------|---------|--------|---|---------|--------|
| A5A3E0 A26CB_HUMAN ANKRD26-like family C member 1B | 16 | Oxidation+M(1)                             | MVVEVDSMPAASSVK                    | 0   | 15 | 3  | 23.19 | b3b4y9                       | 1565.75 | 54.482  | 1851   | 2 | 783.38  | -0.86  |
| A5A3E0 A26CB_HUMAN ANKRD26-like family C member 1B | 17 | Oxidation+M()                              | SQEPEINKDGDRELENFMAIEEMK           | 519 | 24 | 3  | 12.15 | b10y6y11                     | 2868.34 | 82.680  | 1648   | 3 | 956.78  | 12.43  |
| A5A3E0 A26CB_HUMAN ANKRD26-like family C member 1B | 18 | Oxidation+M()                              | FTTMAER                            | 899 | 7  | 5  | 51.88 | b3b4°b4b5b6                  | 871.41  | 29.497  | 1624   | 2 | 436.21  | 11.77  |
| Q9UG22 GIMA2_HUMAN GTPase IMAP family member 2     | 1  |                                            | LGSQTLTK                           | 51  | 8  | 10 | 49.32 | b2b3°b3b4°b4y1y5y7*y7y8      | 847.49  | 26.342  | 188367 | 2 | 424.25  | 1.58   |
| Q9UG22 GIMA2_HUMAN GTPase IMAP family member 2     | 2  |                                            | SQGSWGNR                           | 63  | 8  | 7  | 52.33 | b3°b3*b3b6y3*y3y5            | 891.42  | 21.624  | 8781   | 2 | 446.21  | 14.79  |
| Q9UG22 GIMA2_HUMAN GTPase IMAP family member 2     | 3  |                                            | SQGSWGNREIIVIDTPDMFSWK             | 63  | 22 | 3  | 12.79 | b5b13y7                      | 2566.21 | 89.486  | 2681   | 2 | 1283.61 | -11.51 |
| Q9UG22 GIMA2_HUMAN GTPase IMAP family member 2     | 4  |                                            | EIFGEDAMGHTIVLFTHK                 | 130 | 18 | 3  | 14.75 | b5b9y3                       | 2045.03 | 76.939  | 64552  | 3 | 682.35  | 9.13   |
| Q9UG22 GIMA2_HUMAN GTPase IMAP family member 2     | 5  | Carbamidomethyl+C(4); Carbamidomethyl+C(8) | TQLCVLFCIQLFLR                     | 268 | 14 | 6  | 26.05 | b4°b4*b4b5*b5b8              | 1810.95 | 70.272  | 10070  | 3 | 604.32  | -14.16 |
| Q9UG22 GIMA2_HUMAN GTPase IMAP family member 2     | 6  |                                            | QAFESK                             | 45  | 6  | 1  | 13.2  | y3                           | 709.36  | 32.636  | 6910   | 1 | 709.36  | 8.78   |
| Q9UG22 GIMA2_HUMAN GTPase IMAP family member 2     | 7  |                                            | DQNEHSHWGPHAK                      | 1   | 13 | 3  | 19.58 | b5b10y4                      | 1542.65 | 14.904  | 2667   | 3 | 514.89  | -19.47 |
| Q9UG22 GIMA2_HUMAN GTPase IMAP family member 2     | 8  | Carbamidomethyl+C(2)                       | TCSKSQGSWGNR                       | 59  | 12 | 5  | 21.17 | b6b8°b8y8*y8                 | 1367.62 | 38.800  | 5594   | 2 | 684.32  | 8.75   |
| Q9UG22 GIMA2_HUMAN GTPase IMAP family member 2     | 9  | Carbamidomethyl+C(1)                       | CGPVGSDERVK                        | 226 | 11 | 4  | 30.14 | b4b9°b9b10                   | 1203.59 | 28.698  | 5136   | 2 | 602.30  | 6.80   |
| Q9UG22 GIMA2_HUMAN GTPase IMAP family member 2     | 10 | Carbamidomethyl+C(2)                       | ICAFNNRAEGSNQDDQVK                 | 178 | 18 | 4  | 23.52 | b7y6y9y14                    | 2065.94 | 99.580  | 2794   | 4 | 517.24  | 2.48   |
| Q9UG22 GIMA2_HUMAN GTPase IMAP family member 2     | 11 |                                            | SQGSWGNREIIVIDTPDMFSWK             | 63  | 22 | 3  | 12.79 | b11y4y10                     | 2566.23 | 120.703 | 2588   | 3 | 856.08  | -3.90  |
| Q9UG22 GIMA2_HUMAN GTPase IMAP family member 2     | 12 | Phosphoryl STY(13)                         | VKEIFGEDAMGHTIVLFTHK               | 128 | 20 | 6  | 39.36 | b8b9b11y8y11y12              | 2352.16 | 105.185 | 2701   | 3 | 784.72  | 9.03   |
| Q9UG22 GIMA2_HUMAN GTPase IMAP family member 2     | 13 |                                            | GSQTLTK                            | 52  | 7  | 0  | 1.35  |                              | 734.40  | 26.338  | 55501  | 2 | 367.71  | -1.50  |
| Q04917 1433F_HUMAN 14-3-3 protein eta              | 1  |                                            | NLLSVAYK                           | 42  | 8  | 7  | 34.82 | b1b4*b4y2y3y6y8              | 907.52  | 57.340  | 117498 | 2 | 454.26  | -3.63  |
| Q04917 1433F_HUMAN 14-3-3 protein eta              | 2  |                                            | VISSIEQK                           | 61  | 8  | 4  | 39.59 | y4y6y7y8                     | 903.51  | 28.272  | 28083  | 2 | 452.26  | -5.94  |
| Q04917 1433F_HUMAN 14-3-3 protein eta              | 3  |                                            | AVTELNEPLSNEDR                     | 28  | 14 | 12 | 65.79 | b1b2b5b6b7b8b11y2y7y9y10°y14 | 1586.78 | 47.105  | 10848  | 2 | 793.89  | 7.08   |
| Q04917 1433F_HUMAN 14-3-3 protein eta              | 4  |                                            | YLAEVASGEK                         | 132 | 10 | 5  | 37.67 | b3b8y6°y6y9                  | 1066.56 | 62.684  | 88238  | 2 | 533.78  | 19.57  |
| Q04917 1433F_HUMAN 14-3-3 protein eta              | 5  |                                            | YDDMASAMK                          | 19  | 9  | 6  | 72.26 | b3b6b7y4y5y7                 | 1031.44 | 25.321  | 1740   | 2 | 516.22  | 21.54  |
| Q04917 1433F_HUMAN 14-3-3 protein eta              | 6  |                                            | YDDMASAMKAVTELNEPLSNEDR            | 19  | 23 | 5  | 27.73 | y9y12y13°y13y20              | 2599.20 | 83.181  | 117571 | 3 | 867.07  | 11.84  |
| Q04917 1433F_HUMAN 14-3-3 protein eta              | 7  |                                            | QAFDDAIAELDTLNEDSYKDSSTLI<br>MQLLR | 198 | 29 | 3  | 21.61 | b11y4y5                      | 3328.63 | 120.786 | 24903  | 3 | 1110.21 | 0.29   |
| Q04917 1433F_HUMAN 14-3-3 protein eta              | 8  |                                            | AVTELNEPLSNEDRNLLSVAYK             | 28  | 22 | 4  | 12.79 | b5b8°b8y18                   | 2475.27 | 71.685  | 19718  | 3 | 825.76  | -2.86  |
| Q04917 1433F_HUMAN 14-3-3 protein eta              | 9  |                                            | EAFEISKEQMOPHTPIR                  | 155 | 17 | 4  | 22.84 | b3b6b15°b15                  | 2041.02 | 80.315  | 7290   | 3 | 681.01  | 2.33   |
| Q04917 1433F_HUMAN 14-3-3 protein eta              | 10 | Carbamidomethyl+C(6)                       | FLIKNCNDFQYESK                     | 106 | 14 | 5  | 31.53 | b8b11°b11y5y6                | 1805.88 | 68.552  | 5856   | 2 | 903.44  | 13.38  |
| Q04917 1433F_HUMAN 14-3-3 protein eta              | 11 |                                            | VISSIEQKTMADGNEK                   | 61  | 16 | 8  | 39.81 | b8y3°y3y5*y5y8y13°y13        | 1749.85 | 51.821  | 2598   | 2 | 875.43  | -8.93  |

|                                                   |    |                       |                               |      |    |    |       |                                            |         |         |       |   |         |        |
|---------------------------------------------------|----|-----------------------|-------------------------------|------|----|----|-------|--------------------------------------------|---------|---------|-------|---|---------|--------|
| Q04917 1433F_HUMAN 14-3-3 protein eta             | 12 | Phosphoryl STY(13)    | EAFEISKEQMQPTHPIR             | 155  | 17 | 8  | 51.06 | b4b5°b5b9b11y5y10y11                       | 2120.97 | 68.555  | 8193  | 3 | 707.66  | -2.88  |
| P00338 LDHA_HUMAN L-lactate dehydrogenase A chain | 1  | Carbamidomethyl+C(6)  | VIGSGCNLDSAR                  | 157  | 12 | 10 | 92.37 | b2y3y4y5y6y8y9°y9y10y12                    | 1248.60 | 34.656  | 61983 | 2 | 624.80  | 0.00   |
| P00338 LDHA_HUMAN L-lactate dehydrogenase A chain | 2  |                       | LLIVSNPVDILTYVAWK             | 132  | 17 | 10 | 75.11 | b2b3b4b5y3y4y6y12y13y17                    | 1944.13 | 114.795 | 38051 | 2 | 972.57  | 4.58   |
| P00338 LDHA_HUMAN L-lactate dehydrogenase A chain | 3  | Carbamidomethyl+C(15) | GLYGIKDDVFLSVPICILGQNGISDLVK  | 278  | 27 | 6  | 21.66 | b2b5b9b10y2y14                             | 2920.54 | 103.829 | 20079 | 3 | 974.19  | -2.34  |
| P00338 LDHA_HUMAN L-lactate dehydrogenase A chain | 4  |                       | TLHPDLGTDKDKKEQWK             | 212  | 16 | 4  | 23.94 | b6b11b14y6*                                | 1910.98 | 60.803  | 10557 | 3 | 637.66  | 9.77   |
| P00338 LDHA_HUMAN L-lactate dehydrogenase A chain | 5  |                       | TLHPDLGTDKDKKEQWKEVHK         | 212  | 20 | 6  | 21.41 | b2°b2b3b5b10y12                            | 2404.22 | 29.411  | 3779  | 6 | 401.54  | -1.42  |
| P00338 LDHA_HUMAN L-lactate dehydrogenase A chain | 6  |                       | TLHPDLGTDK                    | 212  | 10 | 8  | 52.18 | b3°b3b5b6y5°y5y6°y6                        | 1096.57 | 85.068  | 14129 | 1 | 1096.57 | 3.12   |
| P00338 LDHA_HUMAN L-lactate dehydrogenase A chain | 7  |                       | QVVESAYEVIK                   | 232  | 11 | 5  | 23.16 | b6°b6b10°b10y9                             | 1264.66 | 54.245  | 12245 | 2 | 632.83  | -15.44 |
| P00338 LDHA_HUMAN L-lactate dehydrogenase A chain | 8  |                       | VTLTSEEEAR                    | 305  | 10 | 7  | 58.2  | b7°b7b9°b9y4y6y8                           | 1134.55 | 27.095  | 2086  | 2 | 567.78  | -8.61  |
| P00338 LDHA_HUMAN L-lactate dehydrogenase A chain | 9  |                       | IVSGKDYNVTANSK                | 76   | 14 | 6  | 37.25 | y4y8y9°y9°y9y12                            | 1495.75 | 28.763  | 23611 | 3 | 499.26  | -14.45 |
| P00338 LDHA_HUMAN L-lactate dehydrogenase A chain | 10 | Carbamidomethyl+C(8)  | NRVIGSGCNLDSAR                | 155  | 14 | 6  | 37.87 | b8°b8b13y7y10y13                           | 1518.74 | 89.548  | 2844  | 2 | 759.88  | 0.40   |
| P00338 LDHA_HUMAN L-lactate dehydrogenase A chain | 11 | Carbamidomethyl+C(21) | EEQTPQNKITVVGVGAVGMACAI SILMK | 14   | 28 | 10 | 37.39 | b8°b8b9°b9b10°b10°b10b23y13y15             | 2944.49 | 109.666 | 2365  | 3 | 982.17  | -13.02 |
| P00338 LDHA_HUMAN L-lactate dehydrogenase A chain | 12 |                       | TLHPDLGTDKDK                  | 212  | 12 | 3  | 21.17 | b6b11y5                                    | 1339.68 | 67.579  | 1840  | 2 | 670.34  | -5.38  |
| P00338 LDHA_HUMAN L-lactate dehydrogenase A chain | 13 | Phosphoryl STY(4)     | VTLTSEEEAR                    | 305  | 10 | 5  | 38.46 | b5°b5y6y8_H3PO4 y8y9                       | 1214.51 | 23.521  | 2972  | 2 | 607.76  | -5.43  |
| P00338 LDHA_HUMAN L-lactate dehydrogenase A chain | 14 | Oxidation+M(19)       | GYTSWAIGLSVADLAESIMK          | 245  | 20 | 3  | 23.05 | b10b14b15                                  | 2128.09 | 78.215  | 25403 | 3 | 710.03  | 10.78  |
| Q13201 MMRN1_HUMAN Multimerin-1                   | 1  |                       | FVLVQENRPTLTDIVELR            | 442  | 18 | 4  | 14.75 | b3y5y14y18                                 | 2142.18 | 81.653  | 52353 | 3 | 714.73  | -4.22  |
| Q13201 MMRN1_HUMAN Multimerin-1                   | 2  |                       | GLTEFVEPIIQIK                 | 961  | 13 | 6  | 43.53 | b3y3y4y6y9y13                              | 1486.85 | 87.998  | 45645 | 2 | 743.93  | 0.25   |
| Q13201 MMRN1_HUMAN Multimerin-1                   | 3  |                       | AQEQQLIHTNQAESHTAVGR          | 283  | 21 | 16 | 93.6  | b2°b2y1y3y4y5°y5y6°y6y9°y9y10y11y12*y12y21 | 2305.10 | 34.088  | 37740 | 4 | 577.03  | -11.97 |
| Q13201 MMRN1_HUMAN Multimerin-1                   | 4  | Carbamidomethyl+C(14) | LAFESENINSEIHCDR              | 1169 | 16 | 5  | 24.61 | b16y5°y5y9y10                              | 1933.86 | 45.023  | 30411 | 3 | 645.29  | -5.62  |
| Q13201 MMRN1_HUMAN Multimerin-1                   | 5  |                       | GSVVTNER                      | 882  | 8  | 6  | 47.56 | b3b6b7°b7y6y8                              | 861.43  | 28.650  | 28289 | 1 | 861.43  | -10.27 |
| Q13201 MMRN1_HUMAN Multimerin-1                   | 6  |                       | LVEENALAPDFSK                 | 1079 | 13 | 5  | 39.81 | y4y6°y6y7y11                               | 1432.73 | 58.470  | 24690 | 2 | 716.87  | 1.79   |
| Q13201 MMRN1_HUMAN Multimerin-1                   | 7  |                       | MSEQLNDLTYDMEILQPILLEQGA SLR  | 634  | 26 | 9  | 26.06 | b2b6y1y2y4y6y7y10y26                       | 3007.48 | 111.746 | 17868 | 3 | 1003.17 | 3.00   |
| Q13201 MMRN1_HUMAN Multimerin-1                   | 8  |                       | LNDSIQTLVNDNQR                | 781  | 14 | 7  | 18.27 | b2°b2b3°b3y9y13y14                         | 1629.81 | 57.202  | 14650 | 3 | 543.94  | -4.19  |
| Q13201 MMRN1_HUMAN Multimerin-1                   | 9  |                       | FQLKDTEENLHVLNQTLAEVLFPM DNK  | 604  | 27 | 4  | 11.49 | b12y9y14°y14                               | 3186.59 | 136.587 | 13705 | 2 | 1593.80 | -7.81  |
| Q13201 MMRN1_HUMAN Multimerin-1                   | 10 |                       | QTMTYEQPK                     | 660  | 9  | 6  | 37.03 | b4b7b8b9°b9y9                              | 1125.53 | 28.325  | 9450  | 2 | 563.27  | 1.63   |
| Q13201 MMRN1_HUMAN Multimerin-1                   | 11 |                       | HSWTIPEDGNSQK                 | 24   | 13 | 8  | 39.34 | b1b4°b4b8y7y8°y8y10                        | 1498.67 | 23.495  | 3137  | 3 | 500.23  | -14.74 |
| Q13201 MMRN1_HUMAN Multimerin-1                   | 12 |                       | TVSSLSLEDLESTR                | 411  | 13 | 5  | 61.31 | y3y5y6y8y11                                | 1423.70 | 52.875  | 30523 | 2 | 712.35  | 3.94   |
| Q13201 MMRN1_HUMAN Multimerin-1                   | 13 |                       | ELEVK                         | 479  | 5  | 1  | 12.75 | b4                                         | 617.34  | 39.358  | 24073 | 1 | 617.34  | -12.46 |
| Q13201 MMRN1_HUMAN Multimerin-1                   | 14 |                       | IFQNDMQETVAQLFK               | 396  | 15 | 5  | 28    | b8b10b11°b11y12                            | 1811.94 | 105.783 | 15425 | 2 | 906.47  | 21.02  |

|                                 |    |                                                      |                                      |      |    |    |       |                                                         |         |         |        |   |         |        |
|---------------------------------|----|------------------------------------------------------|--------------------------------------|------|----|----|-------|---------------------------------------------------------|---------|---------|--------|---|---------|--------|
| Q13201 MMRN1_HUMAN Multimerin-1 | 15 |                                                      | NAPAAESVSNNVTEYMSTLHENIK             | 530  | 24 | 9  | 69.1  | b3b4*b4b6b8b10b12b13b23                                 | 2619.26 | 56.017  | 11886  | 3 | 873.76  | 8.95   |
| Q13201 MMRN1_HUMAN Multimerin-1 | 16 | Carbamidomethyl+C(5);<br>Carbamidomethyl+C(7)        | TSFTCACR                             | 1060 | 8  | 5  | 60.31 | b4y3y5y6y7                                              | 1002.43 | 27.135  | 9263   | 2 | 501.72  | 13.33  |
| Q13201 MMRN1_HUMAN Multimerin-1 | 17 |                                                      | STLPPSETSAPAEGVR                     | 80   | 16 | 8  | 33.57 | b4b13y6°y6y7°y7y13°y13                                  | 1598.77 | 46.012  | 8256   | 3 | 533.60  | -18.78 |
| Q13201 MMRN1_HUMAN Multimerin-1 | 18 |                                                      | SNEQATSLNTVGGTGGIGGVGGTGGVGNR        | 148  | 29 | 5  | 11.2  | b10°b10*b10b15y14                                       | 2574.20 | 65.658  | 7804   | 3 | 858.74  | -19.16 |
| Q13201 MMRN1_HUMAN Multimerin-1 | 19 | Carbamidomethyl+C(9)                                 | TLHEVLTMCHNASTSVSELNATIPK            | 922  | 25 | 3  | 11.89 | b11y9y14                                                | 2753.30 | 72.248  | 7747   | 4 | 689.08  | -21.10 |
| Q13201 MMRN1_HUMAN Multimerin-1 | 20 |                                                      | MYQMFNETTSQVR                        | 822  | 13 | 4  | 28.83 | y4y6°y6y8                                               | 1634.73 | 30.623  | 7716   | 2 | 817.87  | 1.72   |
| Q13201 MMRN1_HUMAN Multimerin-1 | 21 |                                                      | LSPTVILDNQVTVYVPGGK                  | 217  | 18 | 3  | 14.75 | b5b10y4                                                 | 1901.05 | 71.880  | 5426   | 2 | 951.03  | 3.85   |
| Q13201 MMRN1_HUMAN Multimerin-1 | 22 | Carbamidomethyl+C(11)                                | GVAEQQQQCGDPEVMQK                    | 304  | 19 | 4  | 24.61 | b8b9b13y13                                              | 2116.95 | 67.488  | 5317   | 3 | 706.32  | 6.00   |
| Q13201 MMRN1_HUMAN Multimerin-1 | 23 |                                                      | EVHEQLLSTEQVSDQK                     | 514  | 16 | 6  | 16.24 | b6°b6*b6b11y6°y6                                        | 1869.88 | 70.152  | 2610   | 4 | 468.23  | -18.74 |
| Q13201 MMRN1_HUMAN Multimerin-1 | 24 |                                                      | VMSAEIATTPPEAR                       | 59   | 13 | 6  | 45.29 | b5b6°b6b7b10y3                                          | 1375.71 | 45.823  | 2398   | 3 | 459.24  | 18.46  |
| Q13201 MMRN1_HUMAN Multimerin-1 | 25 |                                                      | ETYLRSRGDSSSSQR                      | 180  | 14 | 3  | 18.27 | b5b9y11                                                 | 1572.75 | 52.449  | 121070 | 2 | 786.88  | 12.81  |
| Q13201 MMRN1_HUMAN Multimerin-1 | 26 |                                                      | TSEDSLKSTLPPSETSAPAEGVR              | 72   | 24 | 4  | 12.15 | b3b10y11°y11                                            | 2472.23 | 53.250  | 40383  | 4 | 618.81  | -7.80  |
| Q13201 MMRN1_HUMAN Multimerin-1 | 27 |                                                      | KYQQNMSHLEEK                         | 835  | 12 | 7  | 50.65 | b5b6b9°b9b10y8*y8                                       | 1534.73 | 40.611  | 14641  | 3 | 512.25  | 0.08   |
| Q13201 MMRN1_HUMAN Multimerin-1 | 28 |                                                      | LVEENALAPDFSKGSYR                    | 1079 | 17 | 5  | 34.32 | b3b5b14b15y10                                           | 1895.94 | 89.049  | 13661  | 2 | 948.47  | -7.28  |
| Q13201 MMRN1_HUMAN Multimerin-1 | 29 | Carbamidomethyl+C(21);<br>Carbamidomethyl+C(28)<br>) | LSPTVILDNQVTVYVPGGKGPCGW<br>TGGSCPQR | 217  | 31 | 5  | 30.76 | y3y6y8y12y13                                            | 3301.60 | 72.954  | 13578  | 3 | 1101.21 | -2.00  |
| Q13201 MMRN1_HUMAN Multimerin-1 | 30 |                                                      | MDKMSEQLNDLTYDMEILQPLLE<br>QGASLR    | 631  | 29 | 6  | 22.95 | b4b7b12*b12b22y6                                        | 3381.60 | 119.557 | 8865   | 4 | 846.16  | -10.97 |
| Q13201 MMRN1_HUMAN Multimerin-1 | 31 | Carbamidomethyl+C(3);<br>Carbamidomethyl+C(10)       | GPCGWTGGSCPQRSQK                     | 235  | 16 | 3  | 23.94 | y7y9y11                                                 | 1762.80 | 96.277  | 5300   | 3 | 588.27  | 14.27  |
| Q13201 MMRN1_HUMAN Multimerin-1 | 32 | Carbamidomethyl+C(7)                                 | ESLRGECEDMLSK                        | 585  | 13 | 4  | 32.91 | b6b9y3y4                                                | 1553.71 | 55.216  | 5299   | 3 | 518.57  | 7.78   |
| Q13201 MMRN1_HUMAN Multimerin-1 | 33 |                                                      | IDNISLTVNDVRNTYSSLEGK                | 341  | 21 | 3  | 13.18 | b5y8y13                                                 | 2338.18 | 106.546 | 3016   | 2 | 1169.59 | -3.03  |
| Q13201 MMRN1_HUMAN Multimerin-1 | 34 |                                                      | ELEVKQTHLEGALEQEHSR                  | 479  | 19 | 3  | 21.11 | y4y8y11                                                 | 2233.11 | 97.251  | 2724   | 3 | 745.04  | -3.28  |
| Q13201 MMRN1_HUMAN Multimerin-1 | 35 |                                                      | SNEQATSLNTVGGTGGIGGVGGTGGVGNRAPP     | 148  | 32 | 3  | 10.95 | b9b11y18                                                | 2898.40 | 77.057  | 1851   | 3 | 966.80  | -14.15 |
| Q13201 MMRN1_HUMAN Multimerin-1 | 36 |                                                      | KQSLMMLQMFEDLHIQESK                  | 554  | 19 | 5  | 19.44 | b9b17y4°y4y15                                           | 2336.11 | 105.784 | 1510   | 2 | 1168.56 | -13.27 |
| Q13201 MMRN1_HUMAN Multimerin-1 | 37 | Phosphoryl STY(8)                                    | LQNLTLPNASIK                         | 111  | 13 | 6  | 41.1  | b3b10°b10y5y7y9                                         | 1492.78 | 79.267  | 89936  | 3 | 498.26  | 6.54   |
| Q13201 MMRN1_HUMAN Multimerin-1 | 38 | Phosphoryl STY(7)                                    | LNDSIQTLVNDNQR                       | 781  | 14 | 6  | 37.04 | b4b5°b5b6°b6y9                                          | 1709.78 | 36.392  | 23076  | 3 | 570.60  | -0.14  |
| Q13201 MMRN1_HUMAN Multimerin-1 | 39 | Phosphoryl STY(15)                                   | NAPAAESVSNNVTEYMSTLHENIK             | 530  | 24 | 10 | 47.84 | b9°b9b12b13°b13b17b21y10y11*y11                         | 2699.16 | 46.508  | 14635  | 3 | 900.39  | -13.30 |
| Q13201 MMRN1_HUMAN Multimerin-1 | 40 | Phosphoryl STY(6)                                    | SREFQSLLK                            | 367  | 9  | 16 | 99    | b3b4°b4b5°b5b6°b6b7_H<br>PO3<br>b7°b7b8°b8y5°y5*y5y7*y7 | 1187.58 | 25.345  | 8606   | 2 | 594.29  | 3.29   |
| Q13201 MMRN1_HUMAN Multimerin-1 | 41 | Phosphoryl STY(7)                                    | INNLTVSLEMEK                         | 573  | 12 | 3  | 25.15 | b5y3y4                                                  | 1470.69 | 99.977  | 2412   | 2 | 735.85  | 3.07   |



|                                                                                                 |    |                                         |                               |      |    |    |       |                               |         |         |       |   |         |        |
|-------------------------------------------------------------------------------------------------|----|-----------------------------------------|-------------------------------|------|----|----|-------|-------------------------------|---------|---------|-------|---|---------|--------|
| Q13201 MMRN1_HUMAN Multimerin-1                                                                 | 42 | Phosphoryl STY(15)                      | NAPAAESVSNNVTEYMSTLHENI<br>KK | 530  | 25 | 4  | 26.88 | b7b11b13b14                   | 2827.27 | 73.944  | 1688  | 3 | 943.09  | -6.82  |
| Q13201 MMRN1_HUMAN Multimerin-1                                                                 | 43 | Oxidation+M(16)                         | NAPAAESVSNNVTEYMSTLHENI<br>K  | 530  | 24 | 3  | 12.15 | b10b17y11                     | 2635.25 | 87.705  | 6285  | 3 | 879.09  | 7.60   |
| Q13201 MMRN1_HUMAN Multimerin-1                                                                 | 44 | Oxidation+M(10)                         | INNLTVSLEMEKESLR              | 573  | 16 | 3  | 16.24 | b9b11y7                       | 1891.96 | 97.289  | 5266  | 2 | 946.48  | -12.32 |
| Q13201 MMRN1_HUMAN Multimerin-1                                                                 | 45 | Oxidation+M(2)                          | TMTIINNAIDFIQDNYALK           | 730  | 19 | 6  | 19.44 | b7b14*b14y7y10*y10            | 2214.08 | 68.646  | 3725  | 3 | 738.70  | -13.23 |
| Q13201 MMRN1_HUMAN Multimerin-1                                                                 | 46 | Carbamidomethyl+C(9);<br>Oxidation+M(8) | TLHEVLTMCHNASTSVSELNATIP<br>K | 922  | 25 | 3  | 18.12 | b4b8b12                       | 2769.38 | 111.449 | 3115  | 4 | 693.10  | 9.61   |
| Q13201 MMRN1_HUMAN Multimerin-1                                                                 | 47 | Oxidation+M(8)                          | INEYALEMEDGLNK                | 716  | 14 | 3  | 33.83 | b3b4b5                        | 1654.75 | 70.320  | 1993  | 2 | 827.88  | -9.52  |
| Q13201 MMRN1_HUMAN Multimerin-1                                                                 | 48 |                                         | FQLKDTEENLHVL                 | 604  | 13 | 0  | 9.89  |                               | 1585.82 | 136.651 | 4086  | 1 | 1585.82 | -4.08  |
| Q13201 MMRN1_HUMAN Multimerin-1                                                                 | 49 | Carbamidomethyl+C(14)                   | LAFESENINSEIHCDR              | 1169 | 16 | 1  | 7.28  | b10                           | 1915.85 | 45.047  | 93814 | 3 | 639.29  | -0.64  |
| Q8NFP4 MDGA1_HUMAN MAM<br>domain-containing<br>glycosylphosphatidylinositol anchor protein<br>1 | 1  |                                         | GALDTHAWSLSGNK                | 857  | 14 | 10 | 72.94 | b5*b5y3y4*y4y8y9y10y11y<br>14 | 1456.71 | 51.746  | 52081 | 2 | 728.86  | -8.88  |
| Q8NFP4 MDGA1_HUMAN MAM<br>domain-containing<br>glycosylphosphatidylinositol anchor protein<br>1 | 2  | Carbamidomethyl+C(2)                    | ICGYTQDLTDNFDWTR              | 759  | 16 | 5  | 26.94 | b9y5y6y8y16                   | 2004.90 | 65.860  | 25221 | 2 | 1002.95 | 9.80   |
| Q8NFP4 MDGA1_HUMAN MAM<br>domain-containing<br>glycosylphosphatidylinositol anchor protein<br>1 | 3  | Carbamidomethyl+C(3)                    | LSCHVDAVPQEK                  | 354  | 12 | 8  | 66.4  | b4b6*b6b7b8b11y10y12          | 1382.69 | 39.598  | 20469 | 2 | 691.85  | 11.21  |
| Q8NFP4 MDGA1_HUMAN MAM<br>domain-containing<br>glycosylphosphatidylinositol anchor protein<br>1 | 4  | Carbamidomethyl+C(3)                    | FYCVSFFYHMYGK                 | 830  | 13 | 4  | 39.81 | y6y8y9y12                     | 1748.75 | 96.377  | 8640  | 3 | 583.59  | -5.44  |
| Q8NFP4 MDGA1_HUMAN MAM<br>domain-containing<br>glycosylphosphatidylinositol anchor protein<br>1 | 5  |                                         | LTPYTTFGAGDMASR               | 720  | 15 | 4  | 24.36 | b7b9y10y13                    | 1587.72 | 76.125  | 40017 | 2 | 794.36  | -20.07 |
| Q8NFP4 MDGA1_HUMAN MAM<br>domain-containing<br>glycosylphosphatidylinositol anchor protein<br>1 | 6  | Carbamidomethyl+C(19)                   | GQGVYAPAQAQIVHAGQACVVK        | 17   | 22 | 6  | 27.36 | b4b5b8*b8y6y9                 | 2252.15 | 56.075  | 26183 | 4 | 563.79  | -5.96  |
| Q8NFP4 MDGA1_HUMAN MAM<br>domain-containing<br>glycosylphosphatidylinositol anchor protein<br>1 | 7  | Carbamidomethyl+C(9)                    | EGDTLMLQLVTGHPRPQVR           | 51   | 20 | 5  | 23.05 | b7*b7b13b14*b14               | 2307.14 | 70.269  | 24002 | 3 | 769.72  | -12.70 |
| Q8NFP4 MDGA1_HUMAN MAM<br>domain-containing<br>glycosylphosphatidylinositol anchor protein<br>1 | 8  |                                         | AVVTVR                        | 448  | 6  | 1  | 13.2  | b5                            | 644.40  | 60.014  | 11642 | 1 | 644.40  | -14.40 |
| Q8NFP4 MDGA1_HUMAN MAM<br>domain-containing<br>glycosylphosphatidylinositol anchor protein<br>1 | 9  | Carbamidomethyl+C(12)                   | NLRPQDYASYTCQVSVR             | 202  | 17 | 3  | 15.44 | b9y9y13                       | 2057.00 | 70.214  | 11213 | 2 | 1029.01 | 8.66   |
| Q8NFP4 MDGA1_HUMAN MAM<br>domain-containing<br>glycosylphosphatidylinositol anchor protein<br>1 | 10 | Carbamidomethyl+C(1)                    | CTVNSNPPAR                    | 156  | 10 | 6  | 32.71 | y5*y5y8y9*y9*y9               | 1115.51 | 25.364  | 4245  | 2 | 558.26  | -15.76 |

|                                                                                        |    |                                      |                                |     |    |    |       |                                |         |         |        |   |         |        |
|----------------------------------------------------------------------------------------|----|--------------------------------------|--------------------------------|-----|----|----|-------|--------------------------------|---------|---------|--------|---|---------|--------|
| Q8NFP4 MDGA1_HUMAN MAM domain-containing glycosylphosphatidylinositol anchor protein 1 | 11 |                                      | ESENIQLGQDLK                   | 342 | 12 | 5  | 28.38 | b7b8°b8b11°b11                 | 1373.67 | 63.737  | 3477   | 3 | 458.56  | -13.24 |
| Q8NFP4 MDGA1_HUMAN MAM domain-containing glycosylphosphatidylinositol anchor protein 1 | 12 |                                      | EPDAVDPVLNYR                   | 665 | 12 | 4  | 31.39 | b4b8b10°b10                    | 1387.66 | 27.756  | 2230   | 2 | 694.34  | -16.19 |
| Q8NFP4 MDGA1_HUMAN MAM domain-containing glycosylphosphatidylinositol anchor protein 1 | 13 |                                      | GNFYQEKTVFLR                   | 144 | 12 | 5  | 35.68 | b6b8b11°b11y9                  | 1501.78 | 73.759  | 184779 | 2 | 751.40  | 2.60   |
| Q8NFP4 MDGA1_HUMAN MAM domain-containing glycosylphosphatidylinositol anchor protein 1 | 14 |                                      | TAGSASDKFQETSVFNETLR           | 74  | 20 | 5  | 23.05 | y12*y12y15y16°y16              | 2188.03 | 62.639  | 15943  | 3 | 730.02  | -9.60  |
| Q8NFP4 MDGA1_HUMAN MAM domain-containing glycosylphosphatidylinositol anchor protein 1 | 15 |                                      | GSDTLSHSQDNGVDIYEPLYTQGE TKVLK | 171 | 29 | 3  | 21.61 | b6b7y24                        | 3194.52 | 110.748 | 8611   | 4 | 799.39  | -8.33  |
| Q8NFP4 MDGA1_HUMAN MAM domain-containing glycosylphosphatidylinositol anchor protein 1 | 16 |                                      | FQETSVFNETLRIER                | 82  | 15 | 4  | 25.25 | b7b10°b10b11                   | 1868.94 | 64.913  | 6824   | 2 | 934.97  | -5.09  |
| Q8NFP4 MDGA1_HUMAN MAM domain-containing glycosylphosphatidylinositol anchor protein 1 | 17 | Carbamidomethyl+C(6)                 | TVFLRCTVNSNPPAR                | 151 | 15 | 7  | 46.01 | b3b10b14y4y9*y9y11             | 1731.89 | 105.925 | 6090   | 2 | 866.45  | -4.79  |
| Q8NFP4 MDGA1_HUMAN MAM domain-containing glycosylphosphatidylinositol anchor protein 1 | 18 | Carbamidomethyl+C(11);Oxidation+M(O) | VVVMPSGAGPCQSSQLWGPMAL FLLALQR | 925 | 30 | 6  | 41.84 | b3b8b12b15b17b27               | 3226.62 | 85.029  | 327142 | 3 | 1076.21 | -11.50 |
| Q8NFP4 MDGA1_HUMAN MAM domain-containing glycosylphosphatidylinositol anchor protein 1 | 19 | Oxidation+M(19)                      | SPNTGPPTDISGTPEGYYMFIETSR PR   | 785 | 27 | 6  | 21.66 | b8°b8b9b13°b13y19              | 2986.38 | 68.634  | 4828   | 3 | 996.13  | -2.94  |
| Q8NFP4 MDGA1_HUMAN MAM domain-containing glycosylphosphatidylinositol anchor protein 1 | 20 | Carbamidomethyl+C(1)                 | CHVDAVPQEK                     | 356 | 10 | 1  | 7.44  | b7                             | 1182.57 | 39.617  | 10706  | 2 | 591.79  | 12.70  |
| O00299 CLIC1_HUMAN Chloride intracellular channel protein 1                            | 1  |                                      | LAALNPESNTAGLDIFAK             | 95  | 18 | 12 | 52.86 | b2b3b9y1y2y3y5y12y13°y13y14y18 | 1844.98 | 79.652  | 81844  | 2 | 923.00  | 4.70   |
| O00299 CLIC1_HUMAN Chloride intracellular channel protein 1                            | 2  | Carbamidomethyl+C(2)                 | LCPGGQLPFLLYGTEVHTDTNK         | 57  | 22 | 6  | 36.03 | y3°y3y4y5y20y22                | 2460.22 | 82.548  | 35762  | 3 | 820.74  | -2.08  |
| O00299 CLIC1_HUMAN Chloride intracellular channel protein 1                            | 3  | Carbamidomethyl+C(7)                 | EEFASTCPDDEEIELAYEQAQAK        | 216 | 22 | 5  | 12.35 | y2y9*y9y15y22                  | 2573.16 | 76.951  | 35102  | 2 | 1287.08 | 14.52  |
| O00299 CLIC1_HUMAN Chloride intracellular channel protein 1                            | 4  |                                      | VLDNYLTSPLPEEVDSETSAEDEGV SQRK | 138 | 28 | 8  | 32.17 | y9*y9y12°y12y14y15y21y28       | 3120.50 | 69.410  | 28789  | 3 | 1040.84 | 5.87   |
| O00299 CLIC1_HUMAN Chloride intracellular channel protein 1                            | 5  | Carbamidomethyl+C(4)                 | IGNCPFSQR                      | 20  | 9  | 6  | 52.78 | b2y4y5y6y8y9                   | 1078.51 | 36.610  | 23730  | 2 | 539.76  | 3.51   |
| O00299 CLIC1_HUMAN Chloride intracellular channel protein 1                            | 6  |                                      | NSNPALNDNLEK                   | 119 | 12 | 10 | 53.6  | b3b6°b6b7°b7y6y8y9°y9*y9y9     | 1328.65 | 36.408  | 42182  | 2 | 664.83  | 4.59   |
| O00299 CLIC1_HUMAN Chloride intracellular channel protein 1                            | 7  |                                      | MAEEQPQVELFVK                  | 0   | 13 | 8  | 60.25 | b6b7°b7b8°b8b10b11y10          | 1547.77 | 53.830  | 18178  | 2 | 774.39  | -4.10  |
| O00299 CLIC1_HUMAN Chloride intracellular channel protein 1                            | 8  |                                      | FSAYIKNSNPALNDNLEK             | 113 | 18 | 5  | 20.44 | b7b9y9°y9y11                   | 2038.04 | 60.200  | 154482 | 2 | 1019.52 | 5.63   |
| O00299 CLIC1_HUMAN Chloride intracellular channel protein 1                            | 9  | Carbamidomethyl+C(8)                 | TETVQKLCPPGGQLPFLLYGTEVHTDTNK  | 51  | 28 | 10 | 43.31 | b3b4b6b9°b9b10b14y10°y10*y10   | 3146.60 | 105.275 | 5488   | 3 | 1049.54 | 5.66   |

|                                                                  |    |                       |                        |     |    |    |       |                                        |         |         |       |   |         |        |
|------------------------------------------------------------------|----|-----------------------|------------------------|-----|----|----|-------|----------------------------------------|---------|---------|-------|---|---------|--------|
| O00299 CLIC1_HUMAN Chloride intracellular channel protein 1      | 10 | Phosphoryl STY(3)     | GFTIPEAFR              | 195 | 9  | 6  | 37.03 | y5°y5y7_H3PO4<br>y7°y7y8°y8            | 1117.51 | 28.796  | 13752 | 2 | 559.26  | 9.72   |
| Q4UJ75 A20A4_HUMAN Ankyrin repeat domain-containing protein 20A4 | 1  |                       | ETNAALEK               | 550 | 8  | 14 | 47.56 | b1b3b6°b8°b8y1y2°y2y4°y<br>4y5°y5y6*y6 | 875.44  | 27.149  | 34079 | 2 | 438.22  | -5.58  |
| Q4UJ75 A20A4_HUMAN Ankyrin repeat domain-containing protein 20A4 | 2  |                       | ENAWLVQQLDDVHQB        | 739 | 15 | 7  | 17.17 | b2b5°b5°b5y8y11*y11                    | 1822.90 | 83.823  | 9998  | 2 | 911.95  | -3.88  |
| Q4UJ75 A20A4_HUMAN Ankyrin repeat domain-containing protein 20A4 | 3  | Carbamidomethyl+C(5)  | LMNECDHLK              | 784 | 9  | 4  | 29.25 | b8y6°y6y8                              | 1159.51 | 32.066  | 6997  | 2 | 580.26  | -11.16 |
| Q4UJ75 A20A4_HUMAN Ankyrin repeat domain-containing protein 20A4 | 4  |                       | AEQALPVASEEEQQR        | 359 | 15 | 8  | 35.18 | b1b5b12b14y8y10*y10y15                 | 1684.80 | 47.129  | 6034  | 4 | 421.96  | -7.75  |
| Q4UJ75 A20A4_HUMAN Ankyrin repeat domain-containing protein 20A4 | 5  | Carbamidomethyl+C(5)  | LMNECDHLKESLFQYEREK    | 784 | 19 | 3  | 23.33 | b4b11b12                               | 2469.16 | 93.814  | 2248  | 2 | 1235.08 | 3.56   |
| Q4UJ75 A20A4_HUMAN Ankyrin repeat domain-containing protein 20A4 | 6  |                       | SLALETVQNNLSQTQQQTQEMK | 688 | 22 | 5  | 19.74 | b4y5y7*y7y9                            | 2519.21 | 108.265 | 1575  | 3 | 840.41  | -10.56 |
| Q4UJ75 A20A4_HUMAN Ankyrin repeat domain-containing protein 20A4 | 7  |                       | DSLRL                  | 682 | 4  | 1  | 12.3  | b3                                     | 490.26  | 54.505  | 23294 | 1 | 490.26  | -0.62  |
| Q4UJ75 A20A4_HUMAN Ankyrin repeat domain-containing protein 20A4 | 8  |                       | LNEEMITETAFR           | 561 | 12 | 7  | 61.05 | b6b8b9b11y6°y6y7                       | 1453.70 | 51.796  | 11891 | 2 | 727.35  | -2.77  |
| Q4UJ75 A20A4_HUMAN Ankyrin repeat domain-containing protein 20A4 | 9  |                       | DIYGNTALHYAVYSESTSLAEK | 129 | 22 | 6  | 28.69 | b4b5b7b9°b9y10                         | 2432.14 | 78.740  | 7581  | 2 | 1216.58 | -6.93  |
| Q4UJ75 A20A4_HUMAN Ankyrin repeat domain-containing protein 20A4 | 10 |                       | GQTAQGSIDHVVYTGSGYR    | 10  | 18 | 3  | 14.75 | b4b10y10                               | 1896.88 | 66.461  | 7105  | 2 | 948.94  | -3.48  |
| Q4UJ75 A20A4_HUMAN Ankyrin repeat domain-containing protein 20A4 | 11 |                       | TNVNMLYK               | 449 | 8  | 6  | 49.32 | b6°b6b7y5y7*y7                         | 982.49  | 37.308  | 6743  | 2 | 491.75  | -10.69 |
| Q4UJ75 A20A4_HUMAN Ankyrin repeat domain-containing protein 20A4 | 12 | Carbamidomethyl+C(11) | QNIDVFAQDMCGR          | 220 | 13 | 4  | 19.58 | b3°b3b9y8                              | 1553.66 | 27.808  | 4829  | 3 | 518.56  | -16.03 |
| Q4UJ75 A20A4_HUMAN Ankyrin repeat domain-containing protein 20A4 | 13 |                       | VNNSTGK                | 719 | 7  | 3  | 36.13 | b3b4y5                                 | 719.37  | 41.827  | 4815  | 1 | 719.37  | 8.74   |
| Q4UJ75 A20A4_HUMAN Ankyrin repeat domain-containing protein 20A4 | 14 |                       | YFQTSR                 | 814 | 6  | 2  | 25.94 | b4y5                                   | 801.39  | 93.559  | 3409  | 1 | 801.39  | 3.12   |
| Q4UJ75 A20A4_HUMAN Ankyrin repeat domain-containing protein 20A4 | 15 |                       | QLEPTVQSLEMK           | 477 | 12 | 4  | 21.17 | b7y3y9°y9                              | 1402.71 | 61.503  | 3013  | 1 | 1402.71 | -7.83  |
| Q4UJ75 A20A4_HUMAN Ankyrin repeat domain-containing protein 20A4 | 16 |                       | MVEFLK                 | 180 | 7  | 4  | 39.14 | b4b5b6°b6                              | 879.48  | 27.116  | 2671  | 2 | 440.24  | -20.89 |
| Q4UJ75 A20A4_HUMAN Ankyrin repeat domain-containing protein 20A4 | 17 |                       | LEADIESYQSR            | 601 | 11 | 4  | 26.17 | b9b10y5°y5                             | 1310.63 | 136.309 | 2641  | 1 | 1310.63 | 6.89   |
| Q4UJ75 A20A4_HUMAN Ankyrin repeat domain-containing protein 20A4 | 18 |                       | SGELDALDK              | 56  | 9  | 3  | 29.25 | b5b7y8                                 | 947.49  | 55.247  | 2416  | 1 | 947.49  | 21.64  |
| Q4UJ75 A20A4_HUMAN Ankyrin repeat domain-containing protein 20A4 | 19 |                       | VDSLPAASDDK            | 281 | 10 | 7  | 55.98 | b7y3°y3y4y5y7°y7                       | 1046.50 | 19.647  | 2327  | 2 | 523.75  | -0.58  |

|                                                                  |    |                                               |                                |     |    |    |       |                                    |         |         |        |   |         |        |
|------------------------------------------------------------------|----|-----------------------------------------------|--------------------------------|-----|----|----|-------|------------------------------------|---------|---------|--------|---|---------|--------|
| Q4UJ75 A20A4_HUMAN Ankyrin repeat domain-containing protein 20A4 | 20 |                                               | ENAWLVQQLDDVHQKEDHK            | 739 | 19 | 5  | 22.39 | b10b12°b12b14y15                   | 2332.15 | 80.977  | 158093 | 3 | 778.06  | 9.32   |
| Q4UJ75 A20A4_HUMAN Ankyrin repeat domain-containing protein 20A4 | 21 |                                               | YIKLNEEMITETAFR                | 558 | 15 | 5  | 24.36 | b7*b7b9y7y9                        | 1857.93 | 115.454 | 10410  | 3 | 619.98  | -3.55  |
| Q4UJ75 A20A4_HUMAN Ankyrin repeat domain-containing protein 20A4 | 22 |                                               | VKDENEFLTEQLSETQIK             | 652 | 18 | 5  | 45.56 | b8b9b11b12b15                      | 2151.07 | 107.308 | 9097   | 3 | 717.69  | -5.56  |
| Q4UJ75 A20A4_HUMAN Ankyrin repeat domain-containing protein 20A4 | 23 |                                               | ESLFQYEREK                     | 793 | 10 | 5  | 37.67 | b6b8y5°y5y7                        | 1328.64 | 78.052  | 5600   | 3 | 443.55  | -6.43  |
| Q4UJ75 A20A4_HUMAN Ankyrin repeat domain-containing protein 20A4 | 24 |                                               | GQTAQGSIDHVYTGSGYRIR           | 10  | 20 | 3  | 13.63 | b8b13y12                           | 2166.04 | 94.820  | 4775   | 3 | 722.68  | -13.30 |
| Q4UJ75 A20A4_HUMAN Ankyrin repeat domain-containing protein 20A4 | 25 |                                               | GNRIVNGQGEGPPAK                | 316 | 15 | 4  | 17.17 | b8b13°b13y7                        | 1493.76 | 44.848  | 4309   | 2 | 747.38  | -13.97 |
| Q4UJ75 A20A4_HUMAN Ankyrin repeat domain-containing protein 20A4 | 26 | Carbamidomethyl+C(8)                          | IQLSENICDSTSSAAAGRLTQQR        | 396 | 23 | 3  | 12.44 | b9b12y4                            | 2506.21 | 136.285 | 2110   | 2 | 1253.61 | -7.11  |
| Q4UJ75 A20A4_HUMAN Ankyrin repeat domain-containing protein 20A4 | 27 | Carbamidomethyl+C(1);<br>Carbamidomethyl+C(6) | CQIDVCDKENR                    | 90  | 11 | 6  | 26.17 | b8°b8*b8y7*y7y8                    | 1436.62 | 27.071  | 1756   | 3 | 479.55  | -1.27  |
| Q4UJ75 A20A4_HUMAN Ankyrin repeat domain-containing protein 20A4 | 28 | Carbamidomethyl+C(4)                          | QEICTMKNDNLEK                  | 525 | 13 | 4  | 28.83 | y5*y5y7y10                         | 1622.76 | 31.156  | 1743   | 2 | 811.88  | 2.33   |
| Q4UJ75 A20A4_HUMAN Ankyrin repeat domain-containing protein 20A4 | 29 | Phosphoryl STY(9)                             | VKDENEFLTEQLSETQIK             | 652 | 18 | 3  | 22.15 | b8y10y11                           | 2231.02 | 76.212  | 27680  | 3 | 744.35  | -7.55  |
| Q4UJ75 A20A4_HUMAN Ankyrin repeat domain-containing protein 20A4 | 30 | Phosphoryl STY(6)                             | TEVVVSIKEDK                    | 803 | 11 | 3  | 30.14 | y4y7y8                             | 1326.65 | 53.146  | 9849   | 3 | 442.89  | 4.69   |
| Q4UJ75 A20A4_HUMAN Ankyrin repeat domain-containing protein 20A4 | 31 | Oxidation+M(21)                               | SLALETVQNNLSQTQQQTQEMK         | 688 | 22 | 5  | 19.74 | b13y3y6*y6y20                      | 2535.26 | 120.589 | 419876 | 3 | 845.76  | 7.90   |
| Q4UJ75 A20A4_HUMAN Ankyrin repeat domain-containing protein 20A4 | 32 | Carbamidomethyl+C(11);<br>Oxidation+M(10)     | QNIDVFAQDMCGRDAEDYAISHH<br>LTK | 220 | 26 | 3  | 11.67 | b3b6y10                            | 3050.39 | 102.644 | 7944   | 3 | 1017.47 | 5.04   |
| Q4UJ75 A20A4_HUMAN Ankyrin repeat domain-containing protein 20A4 | 33 | Oxidation+M(10)                               | TQDVSVQVEMSSAISK               | 636 | 16 | 3  | 22.77 | b7y8y9                             | 1724.82 | 66.664  | 1940   | 3 | 575.61  | -12.24 |
| Q4UJ75 A20A4_HUMAN Ankyrin repeat domain-containing protein 20A4 | 34 |                                               | ETNAALEK                       | 550 | 8  | 2  | 9.32  | b6*b6                              | 857.44  | 27.189  | 7506   | 2 | 429.22  | 9.97   |
| O95859 TSN12_HUMAN Tetraspanin-12                                | 1  |                                               | REPGTDQMMSLK                   | 252 | 12 | 11 | 57.07 | b6b10°b10y1y6°y6y7y8y10°<br>y10y12 | 1392.66 | 44.116  | 31817  | 3 | 464.89  | -2.63  |
| O95859 TSN12_HUMAN Tetraspanin-12                                | 2  |                                               | MAREDSVK                       | 0   | 8  | 6  | 34.82 | b7b8y5y7°y7y8                      | 935.45  | 22.226  | 20957  | 2 | 468.23  | -10.44 |
| O95859 TSN12_HUMAN Tetraspanin-12                                | 3  |                                               | IFEHTSMANSFNTHFEMEEL           | 285 | 20 | 3  | 12.65 | b5°b5b10                           | 2414.03 | 93.533  | 15844  | 3 | 805.35  | -5.06  |
| O95859 TSN12_HUMAN Tetraspanin-12                                | 4  |                                               | EPGTDQMMSLK                    | 253 | 11 | 11 | 71.39 | b10*b10y3°y3y5y7*y7y8*y8°<br>y9°y9 | 1236.55 | 27.177  | 14893  | 3 | 412.86  | -6.22  |
| O95859 TSN12_HUMAN Tetraspanin-12                                | 5  |                                               | WLTHAWNFFQR                    | 144 | 11 | 4  | 36.69 | b4b5y3y6                           | 1505.72 | 54.415  | 7257   | 2 | 753.36  | -17.19 |

|                                                         |    |                                                                                                                             |                                      |     |    |    |        |                                                  |         |         |        |   |         |        |
|---------------------------------------------------------|----|-----------------------------------------------------------------------------------------------------------------------------|--------------------------------------|-----|----|----|--------|--------------------------------------------------|---------|---------|--------|---|---------|--------|
| O95859 TSN12_HUMAN Tetraspanin-12                       | 6  | Carbamidomethyl+C(1);<br>Carbamidomethyl+C(2);<br>Carbamidomethyl+C(23);<br>Carbamidomethyl+C(24);<br>Carbamidomethyl+C(31) | CCGVVYFTDWLEMTDWPDDS<br>CCVREFPGCSK  | 158 | 33 | 6  | 33.88  | b11b12y7y7y8y12                                  | 4118.69 | 62.757  | 25268  | 4 | 1030.43 | 4.98   |
| O95859 TSN12_HUMAN Tetraspanin-12                       | 7  |                                                                                                                             | ARMTNYGLPR                           | 132 | 10 | 4  | 25.72  | b3b9b9y7                                         | 1178.60 | 64.797  | 2531   | 2 | 589.80  | -6.63  |
| O95859 TSN12_HUMAN Tetraspanin-12                       | 8  | Oxidation+M()                                                                                                               | REPGTDQMMSLK                         | 252 | 12 | 3  | 25.15  | b6b7y6                                           | 1408.67 | 28.676  | 7607   | 3 | 470.23  | 9.62   |
| P26038 MOES_HUMAN Moesin                                | 1  |                                                                                                                             | IGFPWSEIR                            | 237 | 9  | 5  | 22.52  | y1y4y6y6y9                                       | 1104.58 | 81.896  | 40368  | 2 | 552.79  | -2.98  |
| P26038 MOES_HUMAN Moesin                                | 2  |                                                                                                                             | AQMVQEDLEK                           | 448 | 10 | 6  | 27.48  | b2*b2b6y7y8y10                                   | 1190.58 | 38.006  | 21122  | 2 | 595.79  | 3.08   |
| P26038 MOES_HUMAN Moesin                                | 3  |                                                                                                                             | ALELEQER                             | 371 | 8  | 9  | 60.31  | b1b6y3y4y5y6y8*y8                                | 987.51  | 37.322  | 6625   | 2 | 494.26  | 3.40   |
| P26038 MOES_HUMAN Moesin                                | 4  |                                                                                                                             | REMAEKEKEK                           | 329 | 10 | 6  | 27.48  | b2b3*b3y2y6y7                                    | 1277.67 | 26.353  | 5948   | 2 | 639.34  | 11.94  |
| P26038 MOES_HUMAN Moesin                                | 5  |                                                                                                                             | AQQELEEQTR                           | 360 | 10 | 5  | 46.24  | b1b8y4y6y8                                       | 1231.59 | 22.298  | 3465   | 2 | 616.30  | 0.20   |
| P26038 MOES_HUMAN Moesin                                | 6  |                                                                                                                             | TQEQLALEMAELTAR                      | 412 | 15 | 5  | 28     | b6*b6y7y8y10                                     | 1703.87 | 78.011  | 18777  | 2 | 852.44  | 1.93   |
| P26038 MOES_HUMAN Moesin                                | 7  | Carbamidomethyl+C(5)                                                                                                        | ILALCMGNHELYMR                       | 279 | 14 | 5  | 30.05  | b8y6y9y11*y11                                    | 1720.82 | 70.218  | 10972  | 3 | 574.28  | -5.67  |
| P26038 MOES_HUMAN Moesin                                | 8  |                                                                                                                             | ESEAVEWQQK                           | 438 | 10 | 5  | 25.72  | b5y6*y6y8*y8                                     | 1233.55 | 25.368  | 10597  | 2 | 617.28  | -22.36 |
| P26038 MOES_HUMAN Moesin                                | 9  |                                                                                                                             | SGYLAGDK                             | 143 | 8  | 3  | 31.81  | b6b7y4                                           | 810.41  | 44.915  | 6390   | 1 | 810.41  | 11.82  |
| P26038 MOES_HUMAN Moesin                                | 10 |                                                                                                                             | TIGLR                                | 35  | 5  | 1  | 12.75  | b3                                               | 559.36  | 89.489  | 5872   | 1 | 559.36  | 2.18   |
| P26038 MOES_HUMAN Moesin                                | 11 |                                                                                                                             | QIEEQTG                              | 352 | 7  | 5  | 36.13  | b4*b4b5y4*y4                                     | 875.45  | 28.745  | 3978   | 2 | 438.23  | -1.81  |
| P26038 MOES_HUMAN Moesin                                | 12 |                                                                                                                             | GSELWLGVDALGLNIYEQNDR                | 212 | 21 | 4  | 21.63  | b4*b4b5y8                                        | 2362.16 | 106.563 | 3939   | 3 | 788.06  | -4.13  |
| P26038 MOES_HUMAN Moesin                                | 13 |                                                                                                                             | EELMER                               | 344 | 6  | 2  | 28.95  | y3y5                                             | 806.37  | 47.037  | 3238   | 1 | 806.37  | -1.59  |
| P26038 MOES_HUMAN Moesin                                | 14 |                                                                                                                             | FYPEDVSEELIQDITQR                    | 83  | 17 | 4  | 22.84  | b3b7*b7b10                                       | 2082.04 | 57.983  | 3064   | 2 | 1041.52 | 16.18  |
| P26038 MOES_HUMAN Moesin                                | 15 |                                                                                                                             | TANDMIHAENMR                         | 538 | 12 | 4  | 25.15  | b3b4*b4y3                                        | 1402.64 | 62.673  | 2477   | 3 | 468.22  | 13.14  |
| P26038 MOES_HUMAN Moesin                                | 16 |                                                                                                                             | IQVWHEEHR                            | 171 | 9  | 3  | 29.25  | b5y3y5                                           | 1233.62 | 53.300  | 2095   | 2 | 617.31  | 2.47   |
| P26038 MOES_HUMAN Moesin                                | 17 |                                                                                                                             | IAQDLEMYGVNYFSIK                     | 193 | 16 | 4  | 16.24  | b13y8y11*y11                                     | 1890.92 | 64.907  | 1711   | 2 | 945.96  | -7.62  |
| P26038 MOES_HUMAN Moesin                                | 18 |                                                                                                                             | TTEAEK                               | 508 | 6  | 1  | 13.2   | y3                                               | 678.33  | 49.388  | 1670   | 1 | 678.33  | 5.67   |
| P26038 MOES_HUMAN Moesin                                | 19 |                                                                                                                             | VTTMDAELEFAIQPNTTGK                  | 8   | 19 | 4  | 19.44  | b10b16y3y10                                      | 2066.02 | 105.211 | 1644   | 3 | 689.35  | 5.08   |
| P26038 MOES_HUMAN Moesin                                | 20 | Carbamidomethyl+C(6)                                                                                                        | RILALCMGNHELYMR                      | 278 | 15 | 4  | 25.25  | y5y9*y9y13                                       | 1876.95 | 87.615  | 52452  | 3 | 626.32  | 10.41  |
| P26038 MOES_HUMAN Moesin                                | 21 | Carbamidomethyl+C(10)                                                                                                       | EGILNDDIYCPPEAVLLASYAVQ<br>SKYGFDFNK | 107 | 32 | 4  | 12.89  | b3b20y8y10                                       | 3590.75 | 57.804  | 26825  | 3 | 1197.59 | 4.76   |
| P26038 MOES_HUMAN Moesin                                | 22 |                                                                                                                             | AKFYPEDVSEELIQDITQR                  | 81  | 19 | 5  | 31.62  | b7b11b12b14y6                                    | 2281.11 | 93.358  | 10689  | 3 | 761.04  | -9.95  |
| P26038 MOES_HUMAN Moesin                                | 23 |                                                                                                                             | YGFDFNKEVHK                          | 133 | 10 | 4  | 37.67  | b6b8y7y9                                         | 1236.58 | 26.305  | 9886   | 3 | 412.87  | -13.52 |
| P26038 MOES_HUMAN Moesin                                | 24 |                                                                                                                             | QRIDEFESM                            | 568 | 9  | 6  | 29.25  | b5*b5b6*b6y8*y8                                  | 1154.52 | 31.057  | 6644   | 2 | 577.76  | 2.43   |
| P26038 MOES_HUMAN Moesin                                | 25 |                                                                                                                             | GSELWLGVDALGLNIYEQNDR<br>PK          | 212 | 25 | 6  | 37.84  | b8b10*b10y9y10y11                                | 2801.41 | 93.635  | 5939   | 3 | 934.48  | -11.68 |
| P26038 MOES_HUMAN Moesin                                | 26 |                                                                                                                             | LNKQWEEER                            | 162 | 9  | 3  | 29.25  | b6b7y4                                           | 1217.59 | 30.474  | 5343   | 2 | 609.30  | 2.01   |
| P26038 MOES_HUMAN Moesin                                | 27 |                                                                                                                             | ERQEAEAAK                            | 391 | 9  | 5  | 43.75  | b5*b5y4y5y8                                      | 1089.53 | 21.598  | 1667   | 2 | 545.27  | 9.08   |
| P26038 MOES_HUMAN Moesin                                | 28 | Carbamidomethyl+C(5);<br>Oxidation+M(6)                                                                                     | ILALCMGNHELYMRR                      | 279 | 15 | 9  | 49.18  | b6b7b8b13y7y9y9*y9y9                             | 1892.93 | 71.049  | 24155  | 3 | 631.65  | -0.84  |
| P26038 MOES_HUMAN Moesin                                | 29 | Oxidation+M(7)                                                                                                              | IAQDLEMYGVNYFSIK                     | 193 | 16 | 5  | 26.27  | b4*b4b11b15y11                                   | 1906.92 | 75.360  | 9111   | 3 | 636.31  | -4.29  |
| P26038 MOES_HUMAN Moesin                                | 30 | Carbamidomethyl+C(5);<br>Oxidation+M()                                                                                      | ILALCMGNHELYMR                       | 279 | 14 | 4  | 30.05  | b5b10b12y4                                       | 1736.85 | 83.260  | 3481   | 2 | 868.93  | 11.74  |
| P26038 MOES_HUMAN Moesin                                | 31 | Oxidation+M(3)                                                                                                              | TAMSTPHVAEPAENEQDEQDENG<br>AEASADLR  | 464 | 31 | 8  | 26.14  | b4b8*b8b9*b9b11y10y12                            | 3328.43 | 105.240 | 2599   | 3 | 1110.15 | 5.06   |
| O95810 SDPR_HUMAN Serum<br>deprivation-response protein | 1  |                                                                                                                             | VLIFQEENEIPASVFVK                    | 156 | 17 | 17 | 111.33 | b1b2b3b4b8b10b14y3y4y5<br>y7y11*y11y12y14*y14y17 | 1962.06 | 88.295  | 142502 | 2 | 981.53  | 1.68   |
| O95810 SDPR_HUMAN Serum<br>deprivation-response protein | 2  |                                                                                                                             | LVNMLDAVQENQHK                       | 64  | 14 | 10 | 57.97  | b3y2y5*y5*y5y7y9y10y13y<br>14                    | 1638.81 | 58.749  | 81320  | 3 | 546.94  | -7.82  |
| O95810 SDPR_HUMAN Serum<br>deprivation-response protein | 3  |                                                                                                                             | VSPLTFGR                             | 291 | 8  | 4  | 34.82  | b3y4y6y8                                         | 876.48  | 54.395  | 22090  | 2 | 438.75  | -11.84 |

|                                                      |    |                       |                                                  |     |    |    |       |                                               |         |         |       |   |         |        |
|------------------------------------------------------|----|-----------------------|--------------------------------------------------|-----|----|----|-------|-----------------------------------------------|---------|---------|-------|---|---------|--------|
| O95810 SDPR_HUMAN Serum deprivation-response protein | 4  |                       | QEKPSSPMPSSTPSPSLNLGNT<br>EAIR                   | 19  | 29 | 4  | 17.16 | b10b15°b15b20                                 | 3038.48 | 61.601  | 12079 | 3 | 1013.50 | 2.49   |
| O95810 SDPR_HUMAN Serum deprivation-response protein | 5  |                       | FQHPGSDMR                                        | 10  | 9  | 5  | 29.25 | b4y7y8*y8y9                                   | 1074.48 | 32.123  | 6809  | 2 | 537.75  | 4.66   |
| O95810 SDPR_HUMAN Serum deprivation-response protein | 6  |                       | QPVS GAVEGKEELPDENK                              | 173 | 18 | 3  | 22.15 | b4y7y8                                        | 1925.96 | 57.494  | 3474  | 3 | 642.66  | 5.64   |
| O95810 SDPR_HUMAN Serum deprivation-response protein | 7  |                       | QPVS GAVEGK                                      | 173 | 10 | 4  | 27.48 | b3y3°y3y4                                     | 971.54  | 28.706  | 57025 | 2 | 486.27  | 20.54  |
| O95810 SDPR_HUMAN Serum deprivation-response protein | 8  |                       | SDGDPVQPAVLQVHQTS                                | 408 | 17 | 3  | 15.44 | b11b13y10                                     | 1777.88 | 52.346  | 16920 | 2 | 889.44  | 5.56   |
| O95810 SDPR_HUMAN Serum deprivation-response protein | 9  |                       | YEGSYALTSEEAEER                                  | 394 | 14 | 8  | 48.85 | b3°b3b4b12y3y8y12°y12                         | 1604.68 | 47.683  | 12956 | 2 | 802.84  | -16.81 |
| O95810 SDPR_HUMAN Serum deprivation-response protein | 10 |                       | LLEK                                             | 113 | 4  | 1  | 12.3  | b3                                            | 502.32  | 70.685  | 4897  | 1 | 502.32  | -0.43  |
| O95810 SDPR_HUMAN Serum deprivation-response protein | 11 |                       | SEDLPSSEQMPNDQEEESFAEGHS<br>EASLASALVEGEIAEEAAEK | 314 | 44 | 5  | 13.89 | b3b8y5y13y21                                  | 4677.10 | 86.924  | 3518  | 3 | 1559.71 | 12.63  |
| O95810 SDPR_HUMAN Serum deprivation-response protein | 12 |                       | YQASTSNTVSK                                      | 102 | 11 | 8  | 68.38 | b3b4°b4*b4b6b7b8y7                            | 1185.57 | 21.638  | 3192  | 3 | 395.86  | -7.62  |
| O95810 SDPR_HUMAN Serum deprivation-response protein | 13 |                       | SLEETLHTVDLSSDDDLPHDEEAL<br>EDSAEEK              | 191 | 31 | 15 | 55.89 | b3°b3b5b7b12y4°y4y5y6°y<br>6y9°y9y11y15°y15   | 3468.55 | 118.263 | 2019  | 5 | 694.52  | 5.35   |
| O95810 SDPR_HUMAN Serum deprivation-response protein | 14 | Carbamidomethyl+C(2)  | QCAQVK                                           | 134 | 6  | 1  | 13.2  | y5                                            | 733.37  | 40.680  | 1832  | 1 | 733.37  | 11.49  |
| O95810 SDPR_HUMAN Serum deprivation-response protein | 15 |                       | GEDAAQAEKFQHPGSDMR                               | 1   | 18 | 3  | 22.15 | b10b11y6                                      | 1973.86 | 83.577  | 27849 | 3 | 658.62  | -9.40  |
| O95810 SDPR_HUMAN Serum deprivation-response protein | 16 |                       | MEQRQISLEGSVK                                    | 78  | 13 | 4  | 27.06 | b7b10b11*b11                                  | 1504.79 | 65.086  | 8505  | 2 | 752.90  | 5.19   |
| O95810 SDPR_HUMAN Serum deprivation-response protein | 17 |                       | LSKYQASTSNTVSK                                   | 99  | 14 | 6  | 31.53 | b8°b8b11°b11y10y11                            | 1513.76 | 55.258  | 6238  | 2 | 757.39  | -14.03 |
| O95810 SDPR_HUMAN Serum deprivation-response protein | 18 |                       | EELPDENKSLEETLHTVDLSSDDDL<br>LPHDEEALSDSAEEK     | 183 | 39 | 4  | 10.99 | b3°b3b10y3                                    | 4422.99 | 94.287  | 5721  | 4 | 1106.50 | 7.95   |
| O95810 SDPR_HUMAN Serum deprivation-response protein | 19 |                       | LVNMLDAVQENQHMEQR                                | 64  | 18 | 3  | 14.75 | b3y10y12                                      | 2183.05 | 89.714  | 4582  | 3 | 728.36  | -7.16  |
| O95810 SDPR_HUMAN Serum deprivation-response protein | 20 |                       | VREGESHAENETK                                    | 301 | 13 | 6  | 51.1  | b5b6°b6b7y5y6                                 | 1485.68 | 12.470  | 4259  | 3 | 495.90  | -6.33  |
| O95810 SDPR_HUMAN Serum deprivation-response protein | 21 | Oxidation+M(4)        | LVNMLDAVQENQHK                                   | 64  | 14 | 3  | 18.27 | b4b8y10                                       | 1654.82 | 57.521  | 4118  | 2 | 827.92  | 1.62   |
| O95810 SDPR_HUMAN Serum deprivation-response protein | 22 |                       | SPSLNLGNTTEAIR                                   | 34  | 14 | 0  | 10.79 |                                               | 1500.76 | 61.532  | 63552 | 2 | 750.88  | -4.15  |
| O95810 SDPR_HUMAN Serum deprivation-response protein | 23 |                       | NMLDAVQENQHK                                     | 66  | 12 | 3  | 33.83 | b3b4b5                                        | 1426.69 | 58.757  | 7495  | 2 | 713.85  | 9.07   |
| P28065 PSB9_HUMAN Proteasome subunit beta type-9     | 1  |                       | AGEVHTGTTIMAVEFDGGVVMG<br>SDSR                   | 13  | 26 | 15 | 71.24 | b2b4b6°b6b10b14b15y4y9<br>y11°y11y12y13y22y26 | 2623.19 | 120.620 | 8238  | 3 | 875.07  | -9.12  |
| P28065 PSB9_HUMAN Proteasome subunit beta type-9     | 2  |                       | FTTDAIALAMSRDGSSGGVIVLVT<br>ITAAGVDHR            | 173 | 33 | 4  | 34.95 | b7y5y6y7                                      | 3365.72 | 119.713 | 6098  | 4 | 842.18  | 0.00   |
| P28065 PSB9_HUMAN Proteasome subunit beta type-9     | 3  |                       | FTTDAIALAMSR                                     | 173 | 12 | 4  | 31.39 | b3b5b10b12                                    | 1296.67 | 111.892 | 1503  | 2 | 648.84  | 9.41   |
| P28065 PSB9_HUMAN Proteasome subunit beta type-9     | 4  |                       | EDLSAHLMVAGWDQR                                  | 111 | 15 | 4  | 24.36 | b4b13y3y7                                     | 1727.78 | 61.986  | 28349 | 2 | 864.40  | -19.71 |
| P28065 PSB9_HUMAN Proteasome subunit beta type-9     | 5  | Carbamidomethyl+C(30) | QPFAIGSGSTFIYGYVDAAYKPG<br>MSPEECR               | 141 | 31 | 3  | 22.51 | b11b13b14                                     | 3355.61 | 106.436 | 8382  | 3 | 1119.21 | 20.23  |
| P28065 PSB9_HUMAN Proteasome subunit beta type-9     | 6  |                       | EGGQVYGTLLGMLTR                                  | 126 | 15 | 3  | 23.19 | b13b14y6                                      | 1538.74 | 57.075  | 5046  | 2 | 769.87  | -18.09 |
| P28065 PSB9_HUMAN Proteasome subunit beta type-9     | 7  |                       | NISYK                                            | 104 | 5  | 3  | 25.49 | b3°b3y3                                       | 624.33  | 108.940 | 2680  | 1 | 624.33  | -7.72  |
| P28065 PSB9_HUMAN Proteasome subunit beta type-9     | 8  |                       | DGSSGGVIVLVTITAAGVDHR                            | 185 | 21 | 7  | 29.55 | b18y4°y4y5°y5y7y10                            | 2088.04 | 103.737 | 2044  | 3 | 696.68  | -15.32 |

|                                                  |    |                       |                                       |     |    |   |       |                   |         |         |        |   |        |        |
|--------------------------------------------------|----|-----------------------|---------------------------------------|-----|----|---|-------|-------------------|---------|---------|--------|---|--------|--------|
| P28065 PSB9_HUMAN Proteasome subunit beta type-9 | 9  | Carbamidomethyl+C(30) | QPFAIGGSGSTFIYGYVDAAYKPG MSPEECRR     | 141 | 32 | 4 | 12.89 | b13b15y11y13      | 3511.65 | 72.875  | 387123 | 4 | 878.67 | 2.85   |
| P28065 PSB9_HUMAN Proteasome subunit beta type-9 | 10 |                       | AGAPTGDLPRAGEVHTGTTIMAV EFDGGVVMGSDSR | 3   | 36 | 3 | 10.88 | b4y9y12           | 3558.65 | 113.034 | 20611  | 4 | 890.42 | -14.06 |
| P28065 PSB9_HUMAN Proteasome subunit beta type-9 | 11 | Phosphoryl STY(14)    | EGGQVYGTLLGMLTR                       | 126 | 15 | 6 | 35.18 | b9b12b13y8y13°y13 | 1618.74 | 92.180  | 6365   | 2 | 809.87 | 12.67  |
| P28065 PSB9_HUMAN Proteasome subunit beta type-9 | 12 | Oxidation+M(10)       | YREDLSAHLMVAGWDQR                     | 109 | 17 | 3 | 22.43 | b7y5y6            | 2062.97 | 62.728  | 425337 | 3 | 688.33 | -2.13  |
| P28065 PSB9_HUMAN Proteasome subunit beta type-9 | 13 | Oxidation+M(8)        | EDLSAHLMVAGWDQR                       | 111 | 15 | 4 | 25.25 | b3b13b14°b14      | 1743.81 | 96.881  | 20693  | 2 | 872.41 | -0.77  |
| P28065 PSB9_HUMAN Proteasome subunit beta type-9 | 14 | Oxidation+M(11)       | AGEVHTGTTIMAVEFDGGVVMG SDSR           | 13  | 26 | 4 | 17.34 | b4b10b13y7        | 2639.24 | 100.108 | 11313  | 3 | 880.42 | 11.93  |

Cystic fibrosis PLT LC-MS run 3: PLT\_CF\_290709\_03

| Protein name            | Peptide Rank | Peptide Modification                        | Peptide Sequence               | Peptide sequence start | Peptide sequence Length | Peptide Matched Products | Score  | By Matches                                                                                                        | Precursor MH+ (Da) | Retention time (min) | Intensity | z | Precursor m/z | MH+ Error (ppm) |
|-------------------------|--------------|---------------------------------------------|--------------------------------|------------------------|-------------------------|--------------------------|--------|-------------------------------------------------------------------------------------------------------------------|--------------------|----------------------|-----------|---|---------------|-----------------|
| P63261 ACTG_HUMAN Actin | 1            |                                             | VAPEEHPVLLTEAPLNPK             | 95                     | 18                      | 24                       | 159.69 | b2b4b5b9°b9b12y1y5*y5y6y7y8y9°y9y10y12°y12y14*y14y15y16*y16y17y18                                                 | 1954.05            | 61.148               | 2417309   | 3 | 652.02        | -5.435          |
| P63261 ACTG_HUMAN Actin | 2            |                                             | AGFAGDDAPR                     | 18                     | 10                      | 21                       | 139.38 | b1b2b3b4b7°b7b8y1y2y3y4°y4y5y6°y6y7°y7y8y9°y9y10                                                                  | 976.44             | 30.905               | 1848250   | 2 | 488.73        | -5.126          |
| P63261 ACTG_HUMAN Actin | 3            |                                             | SYELPDGQVITIGNER               | 238                    | 16                      | 39                       | 218.65 | b2b3°b3b4°b4b5°b5b8°b8b9°b9b10b12°b12b13y1y2°y2y4°y4*y4y5°y5y6°y6*y6y7°y7y8y10*y10y11°y11y12°y12*y12y13y14y16     | 1790.88            | 71.814               | 1483661   | 2 | 895.94        | -5.589          |
| P63261 ACTG_HUMAN Actin | 4            |                                             | TTGIVMDSGDGVTHTVPIYEGYALPHAILR | 147                    | 30                      | 36                       | 264.55 | b1b2°b2b3°b3b4°b4b6°b6b7b12b16°b16b18b26y2y3y5y6y7y8y9y10y11y12y14y15y16y20y22y23y24y25y26y28y30                  | 3183.59            | 80.174               | 1141386   | 4 | 796.65        | -8.819          |
| P63261 ACTG_HUMAN Actin | 5            |                                             | EITALAPSTMK                    | 315                    | 11                      | 23                       | 116.62 | b1b2°b2b3°b3b4°b4b6y1y2y3°y3y4°y4y5°y5y6°y6y7y8y9°y9y11                                                           | 1161.61            | 50.535               | 1126399   | 2 | 581.31        | -5.780          |
| P63261 ACTG_HUMAN Actin | 6            | Carbamidomethyl+C(1); Carbamidomethyl+C(16) | CPEALFQPSFLGMESCGIHETTFNSIMK   | 256                    | 28                      | 40                       | 261.78 | b2b3b4°b4b5b6b7b9b10°b10b11b13°b13b16b28y1y2y3y4y5*y5y6y8y10y12*y12y13y14°y14y15y17y18°y18y21*y21y22*y22y23y24y28 | 3231.47            | 92.550               | 781725    | 3 | 1077.83       | 1.209           |
| P63261 ACTG_HUMAN Actin | 7            |                                             | AVFPSIVGRPR                    | 28                     | 11                      | 15                       | 104.96 | b1b2b3b9y1y2y3y4y5y6y7y8°y8y9y11                                                                                  | 1198.70            | 55.696               | 666000    | 2 | 599.85        | -3.666          |
| P63261 ACTG_HUMAN Actin | 8            |                                             | DLYANTVLSGGTTMYPGIADR          | 291                    | 21                      | 20                       | 108.16 | b2b13°b13b14°b14b15°b15b18y1y2y4y5y6y7y8y13°y13y14y17y21                                                          | 2215.08            | 77.474               | 663643    | 2 | 1108.04       | 4.299           |
| P63261 ACTG_HUMAN Actin | 9            |                                             | GYSFTTTAER                     | 196                    | 10                      | 11                       | 82.58  | b2b3°b3y3y4y5y6°y6y7y8°y8                                                                                         | 1132.52            | 42.774               | 614671    | 2 | 566.77        | -2.264          |
| P63261 ACTG_HUMAN Actin | 10           |                                             | HQGVVMGMGQK                    | 39                     | 11                      | 24                       | 149.31 | b1b2°b2b3b4°b4b5b6b7b11y1y2*y2y3*y3y4*y4y5y6y7y9y10*y10y11                                                        | 1171.57            | 33.049               | 379414    | 2 | 586.29        | 0.729           |
| P63261 ACTG_HUMAN Actin | 11           | Carbamidomethyl+C(2)                        | LCYVALDFEQEMATAAASSSLEK        | 215                    | 23                      | 32                       | 242.48 | b2b3b4b5b6b7°b7b8b9b11b12b16°b16y1y3y4y5y6y7y9y10y11°y11y12y14*y14y16y17*y17y18°y18y23                            | 2550.19            | 92.512               | 353053    | 2 | 1275.60       | 5.553           |
| P63261 ACTG_HUMAN Actin | 12           |                                             | DLTDYLMK                       | 183                    | 8                       | 10                       | 46.48  | b2°b2b7b8y1y2y4y5y6y8                                                                                             | 998.48             | 70.685               | 351130    | 2 | 499.74        | -8.252          |
| P63261 ACTG_HUMAN Actin | 13           |                                             | QEYDESGPSIVHRK                 | 359                    | 14                      | 17                       | 131.76 | b4°b4°b4y2y3y4y5y6y7y8y9y10°y10y11y12y14*y14                                                                      | 1644.78            | 31.699               | 325281    | 3 | 548.93        | -9.797          |
| P63261 ACTG_HUMAN Actin | 14           |                                             | KDLYANTVLSGGTTMYPGIADR         | 290                    | 22                      | 40                       | 263.58 | b1b4°b4b5b6b7°b7b8°b8°b8b9b10b12°b12b14°b14b15b16°b16b22°b22y1y2y3y4y5y6y7y8y9°y9y10y11°y11y12y13y14°y14y22       | 2343.16            | 68.849               | 215703    | 3 | 781.72        | -3.126          |
| P63261 ACTG_HUMAN Actin | 15           |                                             | QEYDESGPSIVHR                  | 359                    | 13                      | 10                       | 88     | y3y4y5y6y8y10°y10y11y13*y13                                                                                       | 1516.69            | 37.635               | 152198    | 3 | 506.23        | -9.417          |



|                         |    |                                              |                                |     |    |    |        |                                                                                                               |         |         |         |   |         |         |
|-------------------------|----|----------------------------------------------|--------------------------------|-----|----|----|--------|---------------------------------------------------------------------------------------------------------------|---------|---------|---------|---|---------|---------|
| P63261 ACTG_HUMAN Actin | 16 |                                              | IIAPPERK                       | 328 | 8  | 12 | 71.39  | b2b3y2y3y4y4y5y5y6y6y7y8                                                                                      | 923.56  | 26.694  | 116314  | 2 | 462.28  | -8.525  |
| P63261 ACTG_HUMAN Actin | 17 | Carbamidomethyl+C(1)                         | CDVDIRK                        | 284 | 7  | 9  | 50.77  | b1b2°b2y2y3y4°y4y5y6                                                                                          | 905.44  | 22.651  | 75050   | 2 | 453.23  | -8.965  |
| P63261 ACTG_HUMAN Actin | 18 |                                              | IIAPPER                        | 328 | 7  | 5  | 50.77  | y3y4y5y6y7                                                                                                    | 795.47  | 33.226  | 50492   | 2 | 398.24  | -8.517  |
| P63261 ACTG_HUMAN Actin | 19 |                                              | MQKEITALAPSTMK                 | 312 | 14 | 15 | 74.4   | b2b3b4°b4b6b7°b7°b7y1y3°y3y5y6y11y14                                                                          | 1548.80 | 49.812  | 31639   | 3 | 516.94  | -9.537  |
| P63261 ACTG_HUMAN Actin | 20 |                                              | HQGVMVGMGQKDSYVGDQAQSK         | 39  | 22 | 7  | 35.52  | b3b12b13b14y14°y14y22                                                                                         | 2351.05 | 58.706  | 24855   | 3 | 784.36  | -10.488 |
| P63261 ACTG_HUMAN Actin | 21 |                                              | MTQIMFETFNTPAMYVAIQAVLSLYASGR  | 118 | 29 | 6  | 11.05  | b6y1y2y6°y6y27                                                                                                | 3253.61 | 136.638 | 9437    | 3 | 1085.21 | 0.825   |
| P63261 ACTG_HUMAN Actin | 22 | Carbamidomethyl+C(16)                        | EEEIAALVIDNGSGMCK              | 1   | 17 | 7  | 23.99  | b5b12b14°b14y10°y10y17                                                                                        | 1835.85 | 91.389  | 4428    | 3 | 612.62  | -0.598  |
| P63261 ACTG_HUMAN Actin | 23 |                                              | GILTLK                         | 62  | 6  | 6  | 50.29  | b3b4°b4y3y4°y4                                                                                                | 644.43  | 52.865  | 269676  | 1 | 644.43  | 1.137   |
| P63261 ACTG_HUMAN Actin | 24 | Carbamidomethyl+C(16)                        | EEEEIAALVIDNGSGMCKAGFAGDDAPR   | 1   | 27 | 5  | 34.07  | b12y3y4y5y7                                                                                                   | 2793.29 | 80.084  | 3363    | 2 | 1397.15 | 2.622   |
| P63261 ACTG_HUMAN Actin | 25 | Carbamidomethyl+C(16)<br>;Phosphoryl STY(13) | EEEIAALVIDNGSGMCK              | 1   | 17 | 7  | 46.05  | b6b7°b7b13b15y3_H3PO4y3y4                                                                                     | 1915.80 | 93.097  | 24284   | 3 | 639.27  | -6.181  |
| P63261 ACTG_HUMAN Actin | 26 | Oxidation+M()                                | TTGIVMDSGDGVTHTVPIYEGYALPHAILR | 147 | 30 | 4  | 15.36  | b22y4y6y14                                                                                                    | 3199.59 | 77.105  | 78189   | 4 | 800.65  | -7.173  |
| P63261 ACTG_HUMAN Actin | 27 | Oxidation+M()                                | HQGVMVGMGQKDSYVGDQAQSK         | 39  | 22 | 5  | 25.14  | b10b13°b13y10y11                                                                                              | 2367.04 | 58.673  | 1784    | 2 | 1184.02 | -14.852 |
| P63261 ACTG_HUMAN Actin | 28 |                                              | VFPSIVGRPR                     | 29  | 10 | 1  | 7.55   | b8                                                                                                            | 1127.67 | 55.698  | 49592   | 2 | 564.34  | 0.000   |
| P63261 ACTG_HUMAN Actin | 29 |                                              | IAPPERK                        | 329 | 7  | 0  | 1.44   |                                                                                                               | 810.48  | 26.703  | 35869   | 2 | 405.74  | -8.133  |
| P63261 ACTG_HUMAN Actin | 30 |                                              | PSIVHRK                        | 366 | 7  | 2  | 7.23   | b3°b3                                                                                                         | 836.50  | 31.708  | 29369   | 2 | 418.76  | -7.005  |
| P63261 ACTG_HUMAN Actin | 31 |                                              | PEEHPVLLTEAPLNPK               | 97  | 16 | 6  | 36.51  | b8b9°b9b10°b10b13                                                                                             | 1783.96 | 61.116  | 28306   | 2 | 892.49  | 2.463   |
| P63261 ACTG_HUMAN Actin | 32 |                                              | MVGMGQK                        | 43  | 7  | 0  | 2.88   |                                                                                                               | 750.37  | 33.031  | 9580    | 1 | 750.37  | 6.670   |
| P63261 ACTG_HUMAN Actin | 33 |                                              | LAPSTMK                        | 319 | 7  | 1  | 7.55   | b4                                                                                                            | 747.41  | 50.520  | 6927    | 1 | 747.41  | -0.163  |
| P63261 ACTG_HUMAN Actin | 34 |                                              | YDESGPSIVHR                    | 361 | 11 | 0  | 3.84   |                                                                                                               | 1259.59 | 37.641  | 4068    | 2 | 630.30  | -13.083 |
| P63261 ACTG_HUMAN Actin | 35 |                                              | PDGQVITIGNER                   | 242 | 12 | 1  | 7.32   | b11                                                                                                           | 1298.65 | 71.826  | 3614    | 2 | 649.83  | -11.844 |
| P63261 ACTG_HUMAN Actin | 36 |                                              | HTVPIYEGYALPHAILR              | 160 | 17 | 4  | 16.88  | b3b8°b8b11                                                                                                    | 1950.04 | 80.168  | 1640    | 3 | 650.69  | -8.075  |
| P63261 ACTG_HUMAN Actin | 37 |                                              | EITALAPSTMK                    | 315 | 11 | 0  | 2.88   |                                                                                                               | 1143.61 | 50.517  | 49655   | 2 | 572.31  | 1.921   |
| P63261 ACTG_HUMAN Actin | 38 |                                              | DLTDYLMK                       | 183 | 8  | 0  | 1.44   |                                                                                                               | 980.47  | 70.688  | 41466   | 2 | 490.74  | 0.000   |
| P63261 ACTG_HUMAN Actin | 39 |                                              | AVFPSIVGRPR                    | 28  | 11 | 0  | 2.88   |                                                                                                               | 1180.68 | 55.693  | 4716    | 3 | 394.23  | -12.614 |
| P60709 ACTB_HUMAN Actin | 1  |                                              | VAPEEHPVLLTEAPLNPK             | 95  | 18 | 24 | 159.69 | b2b4b5b9°b9b12y1y5°y5y6y7y8y9°y9y10y12°y12y14°y14y15y16°y16y17y18                                             | 1954.05 | 61.148  | 2417309 | 3 | 652.02  | -5.435  |
| P60709 ACTB_HUMAN Actin | 2  |                                              | AGFAGDDAPR                     | 18  | 10 | 21 | 139.38 | b1b2b3b4b7°b7b8y1y2y3y4°y4y5y6°y6y7°y7y8y9°y9y10                                                              | 976.44  | 30.905  | 1848250 | 2 | 488.73  | -5.126  |
| P60709 ACTB_HUMAN Actin | 3  |                                              | SYELPDGQVITIGNER               | 238 | 16 | 39 | 218.65 | b2b3°b3b4°b4b5°b5b8°b8b9°b9b10b12°b12b13y1y2°y2y4°y4°y4y5°y5y6°y6°y6y7°y7y8y10°y10y11°y11y12°y12°y12y13y14y16 | 1790.88 | 71.814  | 1483661 | 2 | 895.94  | -5.589  |
| P60709 ACTB_HUMAN Actin | 4  |                                              | TTGIVMDSGDGVTHTVPIYEGYALPHAILR | 147 | 30 | 36 | 264.55 | b1b2°b2b3°b3b4°b4b6°b6b7b12b16°b16b18b26y2y3y5y6y7y8y9y10y11y12y14y15y16y20y22y23y24y25y26y28y30              | 3183.59 | 80.174  | 1141386 | 4 | 796.65  | -8.819  |
| P60709 ACTB_HUMAN Actin | 5  |                                              | EITALAPSTMK                    | 315 | 11 | 23 | 116.62 | b1b2°b2b3°b3b4°b4b6y1y2y3°y3y4°y4y5°y5y6°y6y7y8y9°y9y11                                                       | 1161.61 | 50.535  | 1126399 | 2 | 581.31  | -5.780  |

|                         |    |                                                |                                     |     |    |    |        |                                                                                                                                  |         |         |         |   |         |         |
|-------------------------|----|------------------------------------------------|-------------------------------------|-----|----|----|--------|----------------------------------------------------------------------------------------------------------------------------------|---------|---------|---------|---|---------|---------|
| P60709 ACTB_HUMAN Actin | 6  | Carbamidomethyl+C(1);<br>Carbamidomethyl+C(16) | CPEALFQPSFLGMESCGIHETTFFNS<br>IMK   | 256 | 28 | 40 | 261.78 | b2b3b4*4b5b6b7b9b10°b10b<br>11b13*b13b16b28y1y2y3y4y5<br>*y5y6y8y10y12*y12y13y14*y<br>14y15y17y18*y18y21*y21y22<br>*y22y23y24y28 | 3231.47 | 92.550  | 781725  | 3 | 1077.83 | 1.209   |
| P60709 ACTB_HUMAN Actin | 7  |                                                | AVFPSIVGRPR                         | 28  | 11 | 15 | 104.96 | b1b2b3b9y1y2y3y4y5y6y7y8°<br>y8y9y11                                                                                             | 1198.70 | 55.696  | 666000  | 2 | 599.85  | -3.666  |
| P60709 ACTB_HUMAN Actin | 8  |                                                | DLYANTVLSGGTTMYPGIADR               | 291 | 21 | 20 | 108.16 | b2b13°b13b14°b14b15°b15b1<br>8y1y2y4y5y6y7y8y13°y13y14y<br>17y21                                                                 | 2215.08 | 77.474  | 663643  | 2 | 1108.04 | 4.299   |
| P60709 ACTB_HUMAN Actin | 9  |                                                | GYSFTTTAER                          | 196 | 10 | 11 | 82.58  | b2b3°b3y3y4y5y6°y6y7y8°y8                                                                                                        | 1132.52 | 42.774  | 614671  | 2 | 566.77  | -2.264  |
| P60709 ACTB_HUMAN Actin | 10 |                                                | HQGVMMVGMGQK                        | 39  | 11 | 24 | 149.31 | b1b2*b2b3b4*b4b5b6b7b11y1<br>y2*y2y3*y3y4*y4y5y6y7y9y1<br>0*y10y11                                                               | 1171.57 | 33.049  | 379414  | 2 | 586.29  | 0.729   |
| P60709 ACTB_HUMAN Actin | 11 | Carbamidomethyl+C(2)                           | LCYVALDFEQEMATAAASSSSLEK            | 215 | 23 | 32 | 242.48 | b2b3b4b5b6b7°b7b8b9b11b12<br>b16°b16y1y3y4y5y6y7y9y10y<br>11°y11y12y14*y14y16y17*y1<br>7y18°y18y23                               | 2550.19 | 92.512  | 353053  | 2 | 1275.60 | 5.553   |
| P60709 ACTB_HUMAN Actin | 12 |                                                | DLTDYLMK                            | 183 | 8  | 10 | 46.48  | b2°b2b7b8y1y2y4y5y6y8                                                                                                            | 998.48  | 70.685  | 351130  | 2 | 499.74  | -8.252  |
| P60709 ACTB_HUMAN Actin | 13 |                                                | QEYDESGPSIVHRK                      | 359 | 14 | 17 | 131.76 | b4°b4*b4y2y3y4y5y6y7y8y9y<br>10°y10y11y12y14*y14                                                                                 | 1644.78 | 31.699  | 325281  | 3 | 548.93  | -9.797  |
| P60709 ACTB_HUMAN Actin | 14 |                                                | KDLYANTVLSGGTTMYPGIADR              | 290 | 22 | 40 | 263.58 | b1b4°b4b5b6b7°b7°b7b8°b8°*<br>b8b9b10b12°b12b14°b14b15b<br>16°b16b22°b22y1y2y3y4y5y6y<br>7y8y9°y9y10y11°y11y12y13y1<br>4°y14y22  | 2343.16 | 68.849  | 215703  | 3 | 781.72  | -3.126  |
| P60709 ACTB_HUMAN Actin | 15 |                                                | QEYDESGPSIVHR                       | 359 | 13 | 10 | 88     | y3y4y5y6y8y10°y10y11y13*y1<br>3                                                                                                  | 1516.69 | 37.635  | 152198  | 3 | 506.23  | -9.417  |
| P60709 ACTB_HUMAN Actin | 16 |                                                | IIAPPERK                            | 328 | 8  | 12 | 71.39  | b2b3y2y3y4°y4y5°y5y6°y6y7y<br>8                                                                                                  | 923.56  | 26.694  | 116314  | 2 | 462.28  | -8.525  |
| P60709 ACTB_HUMAN Actin | 17 | Carbamidomethyl+C(1)                           | CDVDIRK                             | 284 | 7  | 9  | 50.77  | b1b2°b2y2y3y4°y4y5y6                                                                                                             | 905.44  | 22.651  | 75050   | 2 | 453.23  | -8.965  |
| P60709 ACTB_HUMAN Actin | 18 |                                                | IIAPPER                             | 328 | 7  | 5  | 50.77  | y3y4y5y6y7                                                                                                                       | 795.47  | 33.226  | 50492   | 2 | 398.24  | -8.517  |
| P60709 ACTB_HUMAN Actin | 19 |                                                | MQKEITALAPSTMK                      | 312 | 14 | 15 | 74.4   | b2b3b4°b4b6b7°b7°b7y1y3°y3<br>y5y6y11y14                                                                                         | 1548.80 | 49.812  | 31639   | 3 | 516.94  | -9.537  |
| P60709 ACTB_HUMAN Actin | 20 |                                                | HQGVMMVGMGQKDSYVGDEAQS<br>K         | 39  | 22 | 7  | 35.52  | b3b12b13b14y14*y14y22                                                                                                            | 2351.05 | 58.706  | 24855   | 3 | 784.36  | -10.488 |
| P60709 ACTB_HUMAN Actin | 21 |                                                | MTQIMFETFNTPAMYVAIQAVLSL<br>YASGR   | 118 | 29 | 6  | 11.05  | b6y1y2y6°y6y27                                                                                                                   | 3253.61 | 136.638 | 9437    | 3 | 1085.21 | 0.825   |
| P60709 ACTB_HUMAN Actin | 22 |                                                | YPIEHGIVTNWDDMEK                    | 68  | 16 | 6  | 38.3   | b5°b5b6y7y9y11                                                                                                                   | 1946.91 | 45.026  | 4152    | 2 | 973.96  | 6.772   |
| P60709 ACTB_HUMAN Actin | 23 | Carbamidomethyl+C(3);<br>Carbamidomethyl+C(18) | FRCPEALFQPSFLGMESCGIHETTFF<br>NSIMK | 254 | 30 | 14 | 78.33  | b3b5b6b7b9b11b12°b12y10y1<br>5y17y19y21y22                                                                                       | 3534.61 | 90.466  | 1505575 | 4 | 884.41  | -7.391  |
| P60709 ACTB_HUMAN Actin | 24 | Carbamidomethyl+C(4)                           | EKLCYVALDFEQEMATAAASSSSLE<br>K      | 213 | 25 | 17 | 108.76 | b3b5b11b24y3°y3y5°y5y6y7y8<br>y10y13y16y17*y17y23                                                                                | 2807.32 | 93.094  | 53720   | 3 | 936.44  | 1.826   |
| P60709 ACTB_HUMAN Actin | 25 |                                                | IKIIAPPER                           | 326 | 9  | 4  | 54.74  | y3y4y6y7                                                                                                                         | 1036.65 | 43.706  | 34966   | 2 | 518.83  | 0.118   |
| P60709 ACTB_HUMAN Actin | 26 |                                                | GYSFTTTAEREIVR                      | 196 | 14 | 3  | 26.24  | b3b6b8                                                                                                                           | 1629.81 | 58.006  | 13250   | 3 | 543.94  | -9.362  |
| P60709 ACTB_HUMAN Actin | 27 |                                                | IIAPPERK                            | 328 | 8  | 3  | 31.02  | b3y6y7                                                                                                                           | 923.57  | 36.971  | 11051   | 2 | 462.29  | 1.454   |
| P60709 ACTB_HUMAN Actin | 28 | Carbamidomethyl+C(16)                          | DDDI AALVVDNGSGMCKAGFAG<br>DDAPR    | 1   | 27 | 12 | 69.52  | b6b7°b7b11b20y4y8y9y10y13<br>y14y16                                                                                              | 2737.20 | 79.499  | 6232    | 4 | 685.06  | -6.422  |
| P60709 ACTB_HUMAN Actin | 29 |                                                | HQGVMMVGMGQKDSYVGDEAQS<br>K         | 39  | 22 | 3  | 21.18  | b10y14y15                                                                                                                        | 2351.07 | 88.468  | 2959    | 3 | 784.36  | -2.492  |

|                                             |    |                                                                  |                                  |     |    |    |        |                                                                                    |         |         |        |   |         |         |
|---------------------------------------------|----|------------------------------------------------------------------|----------------------------------|-----|----|----|--------|------------------------------------------------------------------------------------|---------|---------|--------|---|---------|---------|
| P60709 ACTB_HUMAN Actin                     | 30 |                                                                  | DLYANTVLSGGTTMYPGIADRMQ<br>K     | 291 | 24 | 4  | 11.85  | b6b10°b10y5                                                                        | 2602.24 | 124.086 | 1731   | 3 | 868.09  | -7.693  |
| P60709 ACTB_HUMAN Actin                     | 31 | Oxidation+M()                                                    | KDLYANTVLSGGTTMYPGIADR           | 290 | 22 | 6  | 42.5   | b5b9y6y7y10y11                                                                     | 2359.15 | 62.747  | 6446   | 3 | 787.06  | -3.208  |
| P60709 ACTB_HUMAN Actin                     | 32 | Carbamidomethyl+C(1);<br>Carbamidomethyl+C(16)<br>;Oxidation+M() | CPEALFQPSFLGMESCIGHETTFNS<br>IMK | 256 | 28 | 6  | 16     | b12°b12y5*y5y10y13                                                                 | 3247.42 | 92.516  | 3954   | 2 | 1624.21 | -12.555 |
| P60709 ACTB_HUMAN Actin                     | 33 |                                                                  | FPSIVGRPR                        | 30  | 9  | 5  | 29.45  | b3°b3b4b7°b7                                                                       | 1028.59 | 55.689  | 681230 | 2 | 514.80  | -6.053  |
| P60709 ACTB_HUMAN Actin                     | 34 |                                                                  | AGDDAPR                          | 21  | 7  | 4  | 34.99  | b3b4b5°b5                                                                          | 701.32  | 30.887  | 60469  | 1 | 701.32  | 1.828   |
| P60709 ACTB_HUMAN Actin                     | 35 |                                                                  | FAGDDAPR                         | 20  | 8  | 1  | 7.86   | b6                                                                                 | 848.39  | 30.877  | 49287  | 2 | 424.70  | -1.655  |
| P60709 ACTB_HUMAN Actin                     | 36 |                                                                  | SGPSIVHRK                        | 364 | 9  | 2  | 7.23   | b3°b3                                                                              | 980.56  | 31.710  | 42435  | 2 | 490.78  | -1.743  |
| P60709 ACTB_HUMAN Actin                     | 37 |                                                                  | GPSIVHRK                         | 365 | 8  | 2  | 7.23   | b3°b3                                                                              | 893.53  | 31.693  | 37198  | 2 | 447.27  | -6.421  |
| P60709 ACTB_HUMAN Actin                     | 38 |                                                                  | TALAPSTMK                        | 317 | 9  | 0  | 2.88   |                                                                                    | 919.49  | 50.516  | 17998  | 1 | 919.49  | 0.465   |
| P60709 ACTB_HUMAN Actin                     | 39 |                                                                  | GFAGDDAPR                        | 19  | 9  | 1  | 7.86   | b4                                                                                 | 905.42  | 30.882  | 17364  | 2 | 453.21  | 4.989   |
| P60709 ACTB_HUMAN Actin                     | 40 |                                                                  | TMYPGIADR                        | 303 | 9  | 0  | 7.68   |                                                                                    | 1023.49 | 77.426  | 14881  | 1 | 1023.49 | -3.340  |
| P60709 ACTB_HUMAN Actin                     | 41 |                                                                  | SIVGRPR                          | 32  | 7  | 2  | 20.8   | b5b6                                                                               | 784.47  | 55.712  | 12161  | 2 | 392.74  | -11.126 |
| P60709 ACTB_HUMAN Actin                     | 42 |                                                                  | YDESGPSIVHRK                     | 361 | 12 | 1  | 7.23   | b3                                                                                 | 1387.68 | 31.670  | 2063   | 3 | 463.23  | -13.107 |
| P60709 ACTB_HUMAN Actin                     | 43 |                                                                  | GYSFTTTAER                       | 196 | 10 | 0  | 2.4    |                                                                                    | 1114.53 | 42.754  | 20015  | 2 | 557.77  | 12.048  |
| P60709 ACTB_HUMAN Actin                     | 44 |                                                                  | AGFAGDDAPR                       | 18  | 10 | 0  | 2.4    |                                                                                    | 958.44  | 30.863  | 12834  | 2 | 479.72  | 4.521   |
| P68871 HBB_HUMAN Hemoglobin<br>subunit beta | 1  |                                                                  | LLVVYPWTQR                       | 31  | 10 | 18 | 109.71 | b2b3b4b5y1y2*y2y3*y3y4*y4<br>y5*y5*y5y6y7y8y10                                     | 1274.72 | 78.838  | 591442 | 2 | 637.87  | -1.436  |
| P68871 HBB_HUMAN Hemoglobin<br>subunit beta | 2  | Carbamidomethyl+C(8)                                             | LLGNVLCVLAHHFGK                  | 105 | 16 | 18 | 173.09 | b2b3b4*b4b5*b5y2y3y4y5y6y<br>8y9y10y11y13y14y15                                    | 1776.97 | 92.295  | 408586 | 3 | 593.00  | -11.266 |
| P68871 HBB_HUMAN Hemoglobin<br>subunit beta | 3  |                                                                  | VNVDEVGGEALGR                    | 18  | 13 | 28 | 185.87 | b2*b2b3b4*b4b5°b5*b5b6*b6<br>b9*b9b11y2y3y4y6y7y8y9°y9<br>y10°y10y11°y11y12y13*y13 | 1314.67 | 51.008  | 328408 | 2 | 657.84  | 1.114   |
| P68871 HBB_HUMAN Hemoglobin<br>subunit beta | 4  |                                                                  | FFESFGDLSTPDVAVMGNPK             | 41  | 19 | 9  | 69.42  | b2y5y7y9y10y11y14y16y19                                                            | 2058.95 | 82.318  | 317792 | 2 | 1029.98 | 2.727   |
| P68871 HBB_HUMAN Hemoglobin<br>subunit beta | 5  |                                                                  | EFTPPVQAAYQK                     | 121 | 12 | 14 | 70.99  | b2°b2b3°b3b10y2*y2y3y4y8y9<br>*y9y10y12                                            | 1378.71 | 50.439  | 277421 | 2 | 689.86  | 4.516   |
| P68871 HBB_HUMAN Hemoglobin<br>subunit beta | 6  |                                                                  | SAVTALWGK                        | 9   | 9  | 9  | 70.62  | b7y1y2y3y4y5y6y7y9                                                                 | 932.51  | 61.103  | 167770 | 2 | 466.76  | -9.032  |
| P68871 HBB_HUMAN Hemoglobin<br>subunit beta | 7  |                                                                  | VVAGVANALAHK                     | 133 | 12 | 12 | 107.66 | b2b3b4y2y3y4y5y7y8y9y10y1<br>2                                                     | 1149.67 | 42.294  | 100661 | 2 | 575.34  | -0.425  |
| P68871 HBB_HUMAN Hemoglobin<br>subunit beta | 8  | Carbamidomethyl+C(11)                                            | GTFATLSELHCDK                    | 83  | 13 | 7  | 58.74  | b4y3y4y7y8y9y13                                                                    | 1478.70 | 54.023  | 93027  | 2 | 739.85  | 4.045   |
| P68871 HBB_HUMAN Hemoglobin<br>subunit beta | 9  |                                                                  | VHLTPEEK                         | 1   | 8  | 7  | 46.48  | b2b3y2y3y4y6y8                                                                     | 952.51  | 26.362  | 66214  | 2 | 476.76  | -4.101  |
| P68871 HBB_HUMAN Hemoglobin<br>subunit beta | 10 |                                                                  | LHVDPENFR                        | 96  | 9  | 5  | 42.19  | b2b3b4y3y5                                                                         | 1126.56 | 47.065  | 41379  | 2 | 563.79  | 0.542   |
| P68871 HBB_HUMAN Hemoglobin<br>subunit beta | 11 | Carbamidomethyl+C(11)                                            | GTFATLSELHCDKLVDPENFR            | 83  | 22 | 22 | 117.12 | b3°b3b4°b4b5b12°b12b13y3*y<br>3y5*y5y6*y6y7*y7y8°y8*y8y1<br>1y14y17                | 2586.21 | 67.671  | 209733 | 4 | 647.31  | -10.290 |
| P68871 HBB_HUMAN Hemoglobin<br>subunit beta | 12 |                                                                  | VVAGVANALAHKYH                   | 133 | 14 | 9  | 97.16  | b3b13y3y4y5y6y7y9y12                                                               | 1449.80 | 45.736  | 42620  | 2 | 725.40  | 3.200   |
| P68871 HBB_HUMAN Hemoglobin<br>subunit beta | 13 |                                                                  | SAVTALWGKVNVDGGEALGR             | 9   | 22 | 3  | 12.43  | b4b8y8                                                                             | 2228.20 | 89.635  | 17068  | 3 | 743.40  | 14.573  |
| P68871 HBB_HUMAN Hemoglobin<br>subunit beta | 14 |                                                                  | AGVANALAHK                       | 135 | 10 | 4  | 30.72  | b3b5*b5b7                                                                          | 951.53  | 42.293  | 67313  | 2 | 476.27  | -5.196  |
| P68871 HBB_HUMAN Hemoglobin<br>subunit beta | 15 | Carbamidomethyl+C(2)                                             | VCVLAHHFGK                       | 111 | 10 | 2  | 20.19  | b3b4                                                                               | 1167.60 | 92.298  | 47179  | 2 | 584.31  | -4.705  |
| P68871 HBB_HUMAN Hemoglobin<br>subunit beta | 16 | Carbamidomethyl+C(6)                                             | GNVLCVLAHHFGK                    | 107 | 14 | 2  | 13.66  | b3b11                                                                              | 1550.81 | 92.290  | 24343  | 3 | 517.61  | -9.997  |
| P68871 HBB_HUMAN Hemoglobin<br>subunit beta | 17 |                                                                  | VAGVANALAHK                      | 134 | 11 | 1  | 7.36   | b3                                                                                 | 1050.60 | 42.294  | 18271  | 2 | 525.81  | -2.091  |

|                                          |    |                                          |                             |     |    |    |        |                                                                            |         |         |        |   |         |         |
|------------------------------------------|----|------------------------------------------|-----------------------------|-----|----|----|--------|----------------------------------------------------------------------------|---------|---------|--------|---|---------|---------|
| P68871 HBB_HUMAN Hemoglobin subunit beta | 18 |                                          | VTALWGK                     | 11  | 7  | 2  | 22.06  | b4b5                                                                       | 774.45  | 61.104  | 16145  | 1 | 774.45  | -0.315  |
| P68871 HBB_HUMAN Hemoglobin subunit beta | 19 | Carbamidomethyl+C(7)                     | LGNVLVCVLAHHFGK             | 106 | 15 | 0  | 5.28   |                                                                            | 1663.89 | 92.287  | 10527  | 3 | 555.30  | -14.306 |
| P68871 HBB_HUMAN Hemoglobin subunit beta | 20 | Carbamidomethyl+C(9)                     | FATLSELHCDK                 | 85  | 11 | 3  | 15.53  | b5°b5b8                                                                    | 1320.62 | 54.046  | 7480   | 3 | 440.88  | -2.403  |
| P68871 HBB_HUMAN Hemoglobin subunit beta | 21 | Carbamidomethyl+C(3)                     | LVCVLAHHFGK                 | 110 | 11 | 2  | 20.19  | b3b4                                                                       | 1280.70 | 92.280  | 7173   | 2 | 640.85  | 2.860   |
| P68871 HBB_HUMAN Hemoglobin subunit beta | 22 |                                          | ANALAHK                     | 138 | 7  | 2  | 20.49  | b3b4                                                                       | 724.41  | 42.304  | 4058   | 1 | 724.41  | -0.337  |
| P68871 HBB_HUMAN Hemoglobin subunit beta | 23 |                                          | SAVTALWGK                   | 9   | 9  | 0  | 1.92   |                                                                            | 914.50  | 61.107  | 3057   | 2 | 457.75  | -5.273  |
| P37802 TAGL2_HUMAN Transgelin-2          | 1  | Carbamidomethyl+C(6)                     | DGTVLCELINALYPEGQAPVKK      | 57  | 22 | 27 | 140.43 | b3°b3b5°b5b8°b8b9°b9b11°b11b12°b12b22y1y2y4y5y7y8y9y10°y10y13y14y16y18y22  | 2415.25 | 105.730 | 297701 | 3 | 805.75  | -3.538  |
| P37802 TAGL2_HUMAN Transgelin-2          | 2  |                                          | YGINTTDIFQTVDLWEGK          | 102 | 18 | 27 | 199.39 | b2b3b4b7b10b13°b13b14b15°b15°b15y2y3°y3y4y5y6y8y9*y9y10y12*y12y13y14y15y18 | 2100.04 | 100.770 | 189979 | 2 | 1050.52 | 3.604   |
| P37802 TAGL2_HUMAN Transgelin-2          | 3  |                                          | TLMNGLGLAVAR                | 127 | 12 | 11 | 79.07  | b1b2b6*b6y4y6y7y8y9y10y12                                                  | 1215.68 | 73.015  | 189602 | 2 | 608.35  | -3.615  |
| P37802 TAGL2_HUMAN Transgelin-2          | 4  |                                          | IQASTMAFK                   | 79  | 9  | 11 | 70.62  | b3y1y2y3y5y6y7y8*y8y9                                                      | 996.52  | 45.882  | 117327 | 2 | 498.76  | -1.225  |
| P37802 TAGL2_HUMAN Transgelin-2          | 5  |                                          | DDGLFSGDPNWFPPK             | 139 | 15 | 11 | 49.77  | b2b3°b3b4y2y3y4y7*y7y10y15                                                 | 1722.80 | 76.889  | 108819 | 3 | 574.94  | -9.707  |
| P37802 TAGL2_HUMAN Transgelin-2          | 6  |                                          | QMEQISQLQAAER               | 88  | 14 | 18 | 116.81 | b3°b3°b3b4°b4b14y3y4y5°y5*y5y6y7y9*y9y11y12y14                             | 1678.82 | 80.708  | 107846 | 2 | 839.91  | 0.218   |
| P37802 TAGL2_HUMAN Transgelin-2          | 7  |                                          | DDGLFSGDPNWFPPK             | 139 | 14 | 18 | 113.29 | b2b3b4b5b6y2y3y6y7°y7*y7y9°y9y10y13°y13*y13y14                             | 1594.73 | 87.457  | 98743  | 2 | 797.87  | 6.430   |
| P37802 TAGL2_HUMAN Transgelin-2          | 8  |                                          | NFSDNQLQEGK                 | 160 | 11 | 7  | 34.12  | b2b9y2y5y8y9y11                                                            | 1279.59 | 36.277  | 90803  | 2 | 640.30  | 0.572   |
| P37802 TAGL2_HUMAN Transgelin-2          | 9  | Carbamidomethyl+C(18)                    | QYDADLEQILQWITTQCR          | 20  | 19 | 13 | 92.57  | b6b10b11y2y3y4y5y6y7°y7y8y10y19                                            | 2394.17 | 115.743 | 55830  | 3 | 798.73  | -4.181  |
| P37802 TAGL2_HUMAN Transgelin-2          | 10 |                                          | DVGRPQGRENFQNWLK            | 40  | 17 | 14 | 49.38  | b6°b6°b6b11°b11b14°b14b15y1y6y7y13°y13y17                                  | 2041.03 | 71.832  | 54666  | 3 | 681.02  | -1.615  |
| P37802 TAGL2_HUMAN Transgelin-2          | 11 |                                          | NVIGLQMGTR                  | 171 | 11 | 5  | 22.46  | b2b3y3y8y11                                                                | 1202.63 | 54.654  | 25170  | 2 | 601.82  | 0.711   |
| P37802 TAGL2_HUMAN Transgelin-2          | 12 |                                          | GASQAGMTGYGMPR              | 182 | 14 | 7  | 56.49  | b3°b3y6y7y8y9y12                                                           | 1383.62 | 44.842  | 16310  | 2 | 692.32  | 6.264   |
| P37802 TAGL2_HUMAN Transgelin-2          | 13 |                                          | TLMNGLGLAVARDDGLFSGDPNWFPPK | 127 | 26 | 3  | 11.43  | b14b22y8                                                                   | 2791.39 | 98.249  | 2730   | 3 | 931.13  | 0.875   |
| P37802 TAGL2_HUMAN Transgelin-2          | 14 | Carbamidomethyl+C(18)                    | QYDADLEQILQWITTQCRK         | 20  | 20 | 4  | 20.69  | b4y3y6y9                                                                   | 2522.27 | 108.322 | 136150 | 3 | 841.43  | -1.742  |
| P37802 TAGL2_HUMAN Transgelin-2          | 15 | Carbamidomethyl+C(21)                    | IEKQYDADLEQILQWITTQCR       | 17  | 22 | 6  | 59.29  | y4y5y6y7*y7y8                                                              | 2764.39 | 109.546 | 8997   | 3 | 922.13  | -4.239  |
| P37802 TAGL2_HUMAN Transgelin-2          | 16 |                                          | DDGLFSGDPNWFPPK             | 139 | 15 | 5  | 27.13  | b4b5b8y11*y11                                                              | 1722.80 | 80.696  | 2891   | 2 | 861.90  | -9.140  |
| P37802 TAGL2_HUMAN Transgelin-2          | 17 |                                          | ENPRNFSDNQLQEGK             | 156 | 15 | 3  | 16.6   | b4y10y14                                                                   | 1775.82 | 55.155  | 2123   | 2 | 888.41  | -5.843  |
| P37802 TAGL2_HUMAN Transgelin-2          | 18 |                                          | TLMNGLGLAVARDDGLFSGDPNWFPPK | 127 | 26 | 7  | 19.7   | b4b19y7y7y11y15*y15                                                        | 2791.40 | 99.934  | 1987   | 4 | 698.61  | 4.985   |
| P37802 TAGL2_HUMAN Transgelin-2          | 19 | Carbamidomethyl+C(18);Phosphoryl STY(15) | QYDADLEQILQWITTQCRK         | 20  | 20 | 6  | 25.96  | b11°b11b13y4y5°y5                                                          | 2602.25 | 108.255 | 19025  | 4 | 651.32  | 7.787   |

|                                                            |    |                                            |                             |     |    |    |        |                                                                                                      |         |         |        |   |         |         |
|------------------------------------------------------------|----|--------------------------------------------|-----------------------------|-----|----|----|--------|------------------------------------------------------------------------------------------------------|---------|---------|--------|---|---------|---------|
| P37802 TAGL2_HUMAN Transgelin-2                            | 20 | Carbamidomethyl+C(18);Phosphoryl STY(15)   | QYDADLEQILQWITTQCR          | 20  | 19 | 5  | 18.69  | b11b13y3y11°y11                                                                                      | 2474.10 | 94.399  | 4974   | 3 | 825.37  | -11.644 |
| P37802 TAGL2_HUMAN Transgelin-2                            | 21 |                                            | FSGDPNWFPPK                 | 143 | 11 | 3  | 24.68  | b3b8b10                                                                                              | 1322.67 | 76.884  | 9641   | 2 | 661.84  | 13.475  |
| P37802 TAGL2_HUMAN Transgelin-2                            | 22 |                                            | PEGQAPVKK                   | 70  | 9  | 6  | 35.38  | b3b4*b4b5°b5b7                                                                                       | 953.54  | 105.739 | 4937   | 2 | 477.27  | -5.057  |
| P37802 TAGL2_HUMAN Transgelin-2                            | 23 |                                            | DDGLFSGDPNWFPPK             | 139 | 15 | 0  | 4.8    |                                                                                                      | 1704.80 | 76.875  | 3504   | 3 | 568.94  | 1.575   |
| P04406 G3P_HUMAN Glycerlaldehyde-3-phosphate dehydrogenase | 1  |                                            | VIHDNFGIVEGLMTTVHAITATQK    | 162 | 24 | 31 | 215.14 | b3b4b5*b5b6b7*b7b8*b8b9b10y2*y2y3y4°y4y5*y5y6*y6y7y8y11y12y14°y14y15*y15y16y22y24                    | 2595.35 | 103.336 | 273371 | 3 | 865.79  | -3.669  |
| P04406 G3P_HUMAN Glycerlaldehyde-3-phosphate dehydrogenase | 2  | Carbamidomethyl+C(7);Carbamidomethyl+C(11) | IISNASCTTNCLAPLAK           | 145 | 17 | 35 | 237.04 | b2b3b7*b7b8b11b12°b12*b12b13°b13*b13b15b16b17y2y3y4y5y6y8y9y10y11*y11y12°y12*y12y13*y13y14y15*y15y17 | 1833.93 | 54.628  | 191901 | 2 | 917.47  | 2.862   |
| P04406 G3P_HUMAN Glycerlaldehyde-3-phosphate dehydrogenase | 3  |                                            | GALQNIIPASTGAAK             | 200 | 15 | 15 | 114.76 | b3b4*b4b5*b5b7y4y6y7y8°y8y9y10y11y15                                                                 | 1411.79 | 60.000  | 150573 | 2 | 706.40  | -1.729  |
| P04406 G3P_HUMAN Glycerlaldehyde-3-phosphate dehydrogenase | 4  |                                            | LISWYDNEFGYSNR              | 309 | 14 | 13 | 119.31 | b6y3y4y6*y6y7y8y9y10*y10y11y12y14                                                                    | 1763.80 | 76.349  | 141610 | 2 | 882.41  | 0.554   |
| P04406 G3P_HUMAN Glycerlaldehyde-3-phosphate dehydrogenase | 5  | Carbamidomethyl+C(13)                      | VPTANVSVVDLTCR              | 234 | 14 | 11 | 86.62  | b5y2y3y5y6°y6y7y8y12y13y14                                                                           | 1530.80 | 61.573  | 101970 | 2 | 765.90  | 2.313   |
| P04406 G3P_HUMAN Glycerlaldehyde-3-phosphate dehydrogenase | 6  |                                            | LVINGNPITIFQERDPSK          | 66  | 18 | 6  | 30.49  | b2y3y12y15y16y18                                                                                     | 2041.09 | 77.759  | 93997  | 3 | 681.03  | -8.971  |
| P04406 G3P_HUMAN Glycerlaldehyde-3-phosphate dehydrogenase | 7  |                                            | VIISAPSADAPMFVMGVNHEK       | 118 | 21 | 16 | 127.3  | b2b3y3y4*y4y6y7y9y11y12y13°y13y16y18y19y21                                                           | 2213.09 | 75.718  | 89029  | 3 | 738.37  | -8.936  |
| P04406 G3P_HUMAN Glycerlaldehyde-3-phosphate dehydrogenase | 8  |                                            | VGVNGFGR                    | 5   | 8  | 9  | 51.25  | b1y2y3y4y5*y5y7y8*y8                                                                                 | 805.42  | 39.600  | 83461  | 2 | 403.22  | -9.245  |
| P04406 G3P_HUMAN Glycerlaldehyde-3-phosphate dehydrogenase | 9  |                                            | LVINGNPITIFQER              | 66  | 14 | 12 | 86.62  | b2b3y3*y3y4y5y6*y6y8y10y11y14                                                                        | 1613.90 | 84.482  | 76510  | 2 | 807.45  | -3.101  |
| P04406 G3P_HUMAN Glycerlaldehyde-3-phosphate dehydrogenase | 10 |                                            | VVDLMAHMASK                 | 323 | 11 | 4  | 34.22  | y2y3y4y5                                                                                             | 1201.59 | 52.530  | 30572  | 3 | 401.20  | -12.394 |
| P04406 G3P_HUMAN Glycerlaldehyde-3-phosphate dehydrogenase | 11 |                                            | VDIVAINDPFDLNYMVMFYQYDSTHGK | 27  | 28 | 19 | 145.5  | b2b3b4b5b6y2y4y5y6y7°y7y8y9y11y20y22y23y24y28                                                        | 3308.57 | 125.463 | 20588  | 3 | 1103.53 | 2.583   |
| P04406 G3P_HUMAN Glycerlaldehyde-3-phosphate dehydrogenase | 12 |                                            | WGDAGA EYVVESTGVFTTMEK      | 86  | 21 | 4  | 19.43  | b4b13b15°b15                                                                                         | 2277.06 | 86.852  | 15398  | 2 | 1139.04 | 11.687  |
| P04406 G3P_HUMAN Glycerlaldehyde-3-phosphate dehydrogenase | 13 |                                            | VIPELNGK                    | 219 | 8  | 4  | 38.8   | y4y5y7*y7                                                                                            | 869.52  | 23.333  | 3332   | 2 | 435.27  | 15.654  |
| P04406 G3P_HUMAN Glycerlaldehyde-3-phosphate dehydrogenase | 14 |                                            | VIISAPSADAPMFVMGVNHEKYDNSLK | 118 | 27 | 14 | 111.66 | b3b4b5°b5y3y8y10y12y13y15y21y22y24y25                                                                | 2933.43 | 74.732  | 117534 | 4 | 734.11  | -9.072  |
| P04406 G3P_HUMAN Glycerlaldehyde-3-phosphate dehydrogenase | 15 |                                            | VVDLMAHMASKE                | 323 | 12 | 6  | 42.38  | y4°y4y8y10°y10y11                                                                                    | 1330.64 | 54.145  | 32309  | 3 | 444.22  | -10.275 |

|                                                           |    |                                              |                                           |     |    |    |        |                                                                              |         |         |        |   |         |         |
|-----------------------------------------------------------|----|----------------------------------------------|-------------------------------------------|-----|----|----|--------|------------------------------------------------------------------------------|---------|---------|--------|---|---------|---------|
| P04406 G3P_HUMAN Glyceraldehyde-3-phosphate dehydrogenase | 16 | Carbamidomethyl+C(20)                        | LTGMAFRVPTANVSVDLTCR                      | 227 | 21 | 9  | 41.68  | b3°b3b6y4°y4y6y8y9y11                                                        | 2307.19 | 80.161  | 29211  | 3 | 769.73  | -2.963  |
| P04406 G3P_HUMAN Glyceraldehyde-3-phosphate dehydrogenase | 17 |                                              | AAFNSGKVDIVAINDPFIDLNYMV<br>YMFQYDSTHGK   | 20  | 35 | 7  | 46.22  | b4y5°y5y6y7y8y20                                                             | 3983.88 | 119.100 | 12175  | 4 | 996.73  | -3.432  |
| P04406 G3P_HUMAN Glyceraldehyde-3-phosphate dehydrogenase | 18 |                                              | IKWGDAGAEYVVESTGVFTTMEK                   | 84  | 23 | 5  | 27.01  | b12y6y8y12y13                                                                | 2518.21 | 86.815  | 10194  | 3 | 840.07  | -4.751  |
| P04406 G3P_HUMAN Glyceraldehyde-3-phosphate dehydrogenase | 19 |                                              | FHGTVKAENGK                               | 55  | 11 | 4  | 34.12  | b9y4y5y9                                                                     | 1187.61 | 62.768  | 6878   | 2 | 594.31  | -7.709  |
| P04406 G3P_HUMAN Glyceraldehyde-3-phosphate dehydrogenase | 20 |                                              | LISWYDNEFGYSNRVVDLMAHM<br>ASK             | 309 | 25 | 6  | 37.77  | b5b6y4y6y9y11                                                                | 2946.40 | 117.394 | 1530   | 5 | 590.09  | 3.480   |
| P04406 G3P_HUMAN Glyceraldehyde-3-phosphate dehydrogenase | 21 | Oxidation+M(12)                              | VIISAPSADAPMFVMGVNHEK                     | 118 | 21 | 10 | 49.16  | b8y3°y3y6y7°y7y8*y8y9°y9                                                     | 2229.09 | 37.417  | 65867  | 4 | 558.03  | -6.681  |
| P04406 G3P_HUMAN Glyceraldehyde-3-phosphate dehydrogenase | 22 | Oxidation+M(19)                              | WGDAGAEYVVESTGVFTTMEK                     | 86  | 21 | 3  | 12.79  | b13b15y7                                                                     | 2293.03 | 59.852  | 3065   | 2 | 1147.02 | -2.555  |
| P04406 G3P_HUMAN Glyceraldehyde-3-phosphate dehydrogenase | 23 |                                              | DLMAHMASK                                 | 325 | 9  | 1  | 7.55   | b3                                                                           | 1003.48 | 52.492  | 16340  | 2 | 502.24  | 5.535   |
| P04406 G3P_HUMAN Glyceraldehyde-3-phosphate dehydrogenase | 24 |                                              | GVNGFGR                                   | 6   | 7  | 1  | 9.12   | b4                                                                           | 706.35  | 39.604  | 7387   | 1 | 706.35  | -13.134 |
| P04406 G3P_HUMAN Glyceraldehyde-3-phosphate dehydrogenase | 25 |                                              | PASTGAAK                                  | 207 | 8  | 3  | 14.15  | b3°b3b5                                                                      | 702.37  | 59.968  | 3876   | 1 | 702.37  | -10.341 |
| P04406 G3P_HUMAN Glyceraldehyde-3-phosphate dehydrogenase | 26 |                                              | GLMTTVHAIATQK                             | 172 | 14 | 4  | 22.14  | b4b5°b5b8                                                                    | 1471.79 | 103.344 | 2959   | 2 | 736.40  | -5.889  |
| P07737 PROF1_HUMAN Profilin-1                             | 1  |                                              | TFVNITPAEVGVLVGK                          | 38  | 16 | 26 | 139.39 | b1b2°b2b3°b3b4°b4*b4b5*b5<br>b6°b6°b6b8b12b14*b14y1y2y<br>6y7y10y11y12y13y16 | 1643.94 | 85.933  | 357853 | 2 | 822.47  | 0.446   |
| P07737 PROF1_HUMAN Profilin-1                             | 2  |                                              | SSFYVNGLTGGQK                             | 56  | 14 | 17 | 129.84 | b3°b3b4b5°b5y4*y4y5y6y7y8y<br>9y10*y10y11*y11y14                             | 1470.76 | 67.459  | 238231 | 2 | 735.88  | 1.328   |
| P07737 PROF1_HUMAN Profilin-1                             | 3  |                                              | TFVNITPAEVGVLVGKDR                        | 38  | 18 | 18 | 85     | b1b2°b2b3°b3b4b5°b5b9y2y5°<br>y5y6y8y13y14y16y18                             | 1915.04 | 80.128  | 184915 | 3 | 639.02  | -14.215 |
| P07737 PROF1_HUMAN Profilin-1                             | 4  |                                              | TLVLLMGK                                  | 108 | 8  | 8  | 58.93  | b2b4y2y3y4y5y6y8                                                             | 874.53  | 69.130  | 155508 | 2 | 437.77  | -13.749 |
| P07737 PROF1_HUMAN Profilin-1                             | 5  |                                              | DSPSVWAAVPGK                              | 26  | 12 | 7  | 49.39  | b8y1y3y4y6y7y12                                                              | 1213.62 | 58.880  | 125187 | 2 | 607.31  | 0.905   |
| P07737 PROF1_HUMAN Profilin-1                             | 6  |                                              | STGGAPTFNVTVK                             | 91  | 14 | 4  | 39.36  | y3y4y5y10                                                                    | 1379.72 | 52.187  | 14701  | 1 | 1379.72 | 1.239   |
| P07737 PROF1_HUMAN Profilin-1                             | 7  | Carbamidomethyl+C(16)                        | AGWNAYIDNLMADGTCQDAAIV<br>GYK             | 1   | 25 | 5  | 20.42  | b5b7b17y13y18                                                                | 2717.26 | 95.962  | 9126   | 2 | 1359.13 | 9.344   |
| P07737 PROF1_HUMAN Profilin-1                             | 8  |                                              | DRSSFYVNGLTGGQK                           | 54  | 16 | 4  | 15.7   | b4b8°b8y11                                                                   | 1741.88 | 62.845  | 8803   | 3 | 581.30  | -5.957  |
| P07737 PROF1_HUMAN Profilin-1                             | 9  | Carbamidomethyl+C(1)                         | CSVIRDSLLQDGEFSMDLR                       | 70  | 19 | 10 | 68.18  | b4b5b7b8°b8b10*b10b11y3y1<br>2                                               | 2241.06 | 110.051 | 3669   | 3 | 747.69  | 0.436   |
| P07737 PROF1_HUMAN Profilin-1                             | 10 | Carbamidomethyl+C(16)<br>;Phosphoryl STY(29) | AGWNAYIDNLMADGTCQDAAIV<br>GYKDSPSVWAAVPGK | 1   | 37 | 5  | 18.82  | b4y3y5y7y9                                                                   | 3991.79 | 104.915 | 331439 | 4 | 998.70  | -0.673  |

|                               |    |                                             |                                     |     |    |    |        |                                                                                                               |         |         |         |   |         |         |
|-------------------------------|----|---------------------------------------------|-------------------------------------|-----|----|----|--------|---------------------------------------------------------------------------------------------------------------|---------|---------|---------|---|---------|---------|
| P07737 PROF1_HUMAN Profilin-1 | 11 | Carbamidomethyl+C(17); Oxidation+M()        | MAGWNAIDNLMADGTCQDAAI VGYK          | 0   | 26 | 3  | 17.58  | y4y9y13                                                                                                       | 2864.30 | 136.490 | 8961    | 2 | 1432.66 | 12.530  |
| P07737 PROF1_HUMAN Profilin-1 | 12 | Oxidation+M(11)                             | DSLQQDGEFSMDLR                      | 75  | 14 | 11 | 83.45  | b3°b3b6y5°y5y7°y7y9y10y11y13                                                                                  | 1641.76 | 95.991  | 4395    | 2 | 821.39  | 13.161  |
| P68133 ACTS_HUMAN Actin       | 1  |                                             | AGFAGDDAPR                          | 20  | 10 | 21 | 139.38 | b1b2b3b4b7°b7b8y1y2y3y4°y4y5y6°y6y7°y7y8y9°y9y10                                                              | 976.44  | 30.905  | 1848250 | 2 | 488.73  | -5.126  |
| P68133 ACTS_HUMAN Actin       | 2  |                                             | SYELPDGQVITIGNER                    | 240 | 16 | 39 | 218.65 | b2b3°b3b4°b4b5°b5b8°b8b9°b9b10b12°b12b13y1y2°y2y4°y4°y4y5°y5y6°y6°y6y7°y7y8y10°y10y11°y11y12°y12°y12y13y14y16 | 1790.88 | 71.814  | 1483661 | 2 | 895.94  | -5.589  |
| P68133 ACTS_HUMAN Actin       | 3  |                                             | EITALAPSTMK                         | 317 | 11 | 23 | 116.62 | b1b2°b2b3°b3b4°b4b6y1y2y3°y3y4°y4y5°y5y6°y6y7y8y9°y9y11                                                       | 1161.61 | 50.535  | 1126399 | 2 | 581.31  | -5.780  |
| P68133 ACTS_HUMAN Actin       | 4  |                                             | YPIEHGIITNWDDEMEK                   | 70  | 16 | 32 | 226.43 | b2b3b4b8b9b11°b11b12°b12b14b15b16y1y2°y2y3y4y5y6°y6y7°y7y8°y8y12°y12y13y14y15°y15°y15y16                      | 1960.92 | 66.672  | 937839  | 2 | 980.96  | 3.113   |
| P68133 ACTS_HUMAN Actin       | 5  |                                             | AVFPSIVGRPR                         | 30  | 11 | 15 | 104.96 | b1b2b3b9y1y2y3y4y5y6y7y8°y8y9y11                                                                              | 1198.70 | 55.696  | 666000  | 2 | 599.85  | -3.666  |
| P68133 ACTS_HUMAN Actin       | 6  |                                             | HQGVMVGMGQK                         | 41  | 11 | 24 | 149.31 | b1b2°b2b3b4°b4b5b6b7b11y1y2°y2y3°y3y4°y4y5y6y7y9y10°y10y11                                                    | 1171.57 | 33.049  | 379414  | 2 | 586.29  | 0.729   |
| P68133 ACTS_HUMAN Actin       | 7  |                                             | DLTDYLMK                            | 185 | 8  | 10 | 46.48  | b2°b2b7b8y1y2y4y5y6y8                                                                                         | 998.48  | 70.685  | 351130  | 2 | 499.74  | -8.252  |
| P68133 ACTS_HUMAN Actin       | 8  |                                             | IIAPPERK                            | 330 | 8  | 12 | 71.39  | b2b3y2y3y4°y4y5°y5y6°y6y7y8                                                                                   | 923.56  | 26.694  | 116314  | 2 | 462.28  | -8.525  |
| P68133 ACTS_HUMAN Actin       | 9  |                                             | IIAPPER                             | 330 | 7  | 5  | 50.77  | y3y4y5y6y7                                                                                                    | 795.47  | 33.226  | 50492   | 2 | 398.24  | -8.517  |
| P68133 ACTS_HUMAN Actin       | 10 |                                             | MQKEITALAPSTMK                      | 314 | 14 | 15 | 74.4   | b2b3b4°b4b6b7°b7°b7y1y3°y3y5y6y11y14                                                                          | 1548.80 | 49.812  | 31639   | 3 | 516.94  | -9.537  |
| P68133 ACTS_HUMAN Actin       | 11 |                                             | HQGVMVGMGQKDSYVGDDEAQS K            | 41  | 22 | 7  | 35.52  | b3b12b13b14y14°y14y22                                                                                         | 2351.05 | 58.706  | 24855   | 3 | 784.36  | -10.488 |
| P68133 ACTS_HUMAN Actin       | 12 |                                             | KDLYANNVMSGGTTMYPGIADR              | 292 | 22 | 3  | 12.43  | b14y11y13                                                                                                     | 2374.12 | 83.137  | 1857    | 3 | 792.04  | 1.440   |
| P68133 ACTS_HUMAN Actin       | 13 |                                             | DLYANNVMSGGTTMYPGIADR               | 293 | 21 | 3  | 12.79  | b5b10y10                                                                                                      | 2246.04 | 55.092  | 1802    | 2 | 1123.52 | 7.283   |
| P68133 ACTS_HUMAN Actin       | 14 |                                             | GILTLKYPIEHGIITNWDDEMEK             | 64  | 22 | 4  | 21.18  | b4b5°b5y13                                                                                                    | 2586.29 | 82.966  | 253562  | 4 | 647.33  | -13.027 |
| P68133 ACTS_HUMAN Actin       | 15 | Carbamidomethyl+C(1); Carbamidomethyl+C(29) | CPETLFQPSFIGMESAGIHETTYNS IMKCDIDIR | 258 | 34 | 11 | 38.05  | b6b7b14°b14y7°y7y8y17y20y24°y24                                                                               | 3960.84 | 96.004  | 201105  | 4 | 990.96  | 2.466   |
| P68133 ACTS_HUMAN Actin       | 16 |                                             | YPIEHGIITNWDDEMEKIWHHTFYNELR        | 70  | 27 | 8  | 19.04  | b8b11y7°y7y10°y10°y10y19                                                                                      | 3457.61 | 97.947  | 14061   | 4 | 865.16  | -8.332  |
| P68133 ACTS_HUMAN Actin       | 17 | Carbamidomethyl+C(2); Carbamidomethyl+C(12) | MCDEDETTALVCDNGSGLVKAG FAGDDAPR     | 0   | 30 | 4  | 16.88  | y5°y5y7y11                                                                                                    | 3171.39 | 122.213 | 11744   | 3 | 1057.80 | 7.005   |
| P68133 ACTS_HUMAN Actin       | 18 |                                             | DLYANNVMSGGTTMYPGIADRM QK           | 293 | 24 | 7  | 26     | b3b11°b11b15°b15b23y18                                                                                        | 2633.25 | 88.623  | 5502    | 3 | 878.42  | 13.629  |
| P68133 ACTS_HUMAN Actin       | 19 |                                             | KDLYANNVMSGGTTMYPGIADR              | 292 | 22 | 4  | 16.39  | b8b11y10y14                                                                                                   | 2374.09 | 78.420  | 1728    | 2 | 1187.55 | -11.209 |
| P68133 ACTS_HUMAN Actin       | 20 | Phosphoryl STY(12)                          | YSVWIGGSILASLSTFQQMWITK             | 338 | 23 | 4  | 21.15  | b12y10y11°y11                                                                                                 | 2696.31 | 102.659 | 8719    | 3 | 899.44  | 0.543   |
| P68133 ACTS_HUMAN Actin       | 21 | Phosphoryl STY(9)                           | DLYANNVMSGGTTMYPGIADR               | 293 | 21 | 7  | 27.14  | b4b5b7°b7y7°y7y12                                                                                             | 2326.00 | 109.327 | 4350    | 3 | 776.00  | 7.242   |
| P68133 ACTS_HUMAN Actin       | 22 | Carbamidomethyl+C(1); Phosphoryl STY()      | CPETLFQPSFIGMESAGIHETTYNS IMK       | 258 | 28 | 11 | 56.37  | b11b12°b12y4y5°y5y6y8y12°y12y14                                                                               | 3268.46 | 101.524 | 3747    | 3 | 1090.16 | 9.113   |

|                         |    |                                        |                            |     |    |    |        |                                                                                                               |         |         |         |   |        |         |
|-------------------------|----|----------------------------------------|----------------------------|-----|----|----|--------|---------------------------------------------------------------------------------------------------------------|---------|---------|---------|---|--------|---------|
| P68133 ACTS_HUMAN Actin | 23 | Phosphoryl STY()                       | VAPEEHPTLLTEAPLNPK         | 97  | 18 | 4  | 21.67  | b9b10°b10y9                                                                                                   | 2035.98 | 61.359  | 2673    | 3 | 679.33 | -8.754  |
| P68133 ACTS_HUMAN Actin | 24 | Oxidation+M()                          | YPIEHGITNWDDMEK            | 70  | 16 | 5  | 38.97  | b3b12b13y3y4                                                                                                  | 1976.90 | 59.606  | 48125   | 3 | 659.64 | -2.964  |
| P68133 ACTS_HUMAN Actin | 25 | Oxidation+M(8)                         | DLYANNVMSGGTTMYPGIADR      | 293 | 21 | 5  | 12.79  | b7b13°b13y10°y10                                                                                              | 2262.04 | 77.270  | 19192   | 3 | 754.68 | 9.822   |
| P68133 ACTS_HUMAN Actin | 26 | Oxidation+M(15)                        | KDLYANNVMSGGTTMYPGIADR     | 292 | 22 | 4  | 22.3   | y5y7y8°y8                                                                                                     | 2390.15 | 90.796  | 2507    | 3 | 797.39 | 14.811  |
| P62736 ACTA_HUMAN Actin | 1  |                                        | AGFAGDDAPR                 | 20  | 10 | 21 | 139.38 | b1b2b3b4b7°b7b8y1y2y3y4°y4y5y6°y6y7°y7y8y9°y9y10                                                              | 976.44  | 30.905  | 1848250 | 2 | 488.73 | -5.126  |
| P62736 ACTA_HUMAN Actin | 2  |                                        | SYELPDGQVITIGNER           | 240 | 16 | 39 | 218.65 | b2b3°b3b4°b4b5°b5b8°b8b9°b9b10b12°b12b13y1y2°y2y4°y4°y4y5°y5y6°y6°y6y7°y7y8y10°y10y11°y11y12°y12°y12y13y14y16 | 1790.88 | 71.814  | 1483661 | 2 | 895.94 | -5.589  |
| P62736 ACTA_HUMAN Actin | 3  |                                        | EITALAPSTMK                | 317 | 11 | 23 | 116.62 | b1b2°b2b3°b3b4°b4b6y1y2y3°y3y4°y4y5°y5y6°y6y7y8y9°y9y11                                                       | 1161.61 | 50.535  | 1126399 | 2 | 581.31 | -5.780  |
| P62736 ACTA_HUMAN Actin | 4  |                                        | YPIEHGITNWDDMEK            | 70  | 16 | 32 | 226.43 | b2b3b4b8b9b11°b11b12°b12b14b15b16y1y2°y2y3y4y5y6°y6y7°y7y8°y8y12°y12y13y14y15°y15°y15y16                      | 1960.92 | 66.672  | 937839  | 2 | 980.96 | 3.113   |
| P62736 ACTA_HUMAN Actin | 5  |                                        | AVFPSIVGRPR                | 30  | 11 | 15 | 104.96 | b1b2b3b9y1y2y3y4y5y6y7y8°y8y9y11                                                                              | 1198.70 | 55.696  | 666000  | 2 | 599.85 | -3.666  |
| P62736 ACTA_HUMAN Actin | 6  |                                        | HQGVVMGMGQK                | 41  | 11 | 24 | 149.31 | b1b2°b2b3b4°b4b5b6b7b11y1y2°y2y3°y3y4°y4y5y6y7y9y10°y10y11                                                    | 1171.57 | 33.049  | 379414  | 2 | 586.29 | 0.729   |
| P62736 ACTA_HUMAN Actin | 7  |                                        | DLTDYLMK                   | 185 | 8  | 10 | 46.48  | b2°b2b7b8y1y2y4y5y6y8                                                                                         | 998.48  | 70.685  | 351130  | 2 | 499.74 | -8.252  |
| P62736 ACTA_HUMAN Actin | 8  |                                        | IIAPPERK                   | 330 | 8  | 12 | 71.39  | b2b3y2y3y4°y4y5°y5y6°y6y7y8                                                                                   | 923.56  | 26.694  | 116314  | 2 | 462.28 | -8.525  |
| P62736 ACTA_HUMAN Actin | 9  |                                        | IIAPPER                    | 330 | 7  | 5  | 50.77  | y3y4y5y6y7                                                                                                    | 795.47  | 33.226  | 50492   | 2 | 398.24 | -8.517  |
| P62736 ACTA_HUMAN Actin | 10 |                                        | MQKEITALAPSTMK             | 314 | 14 | 15 | 74.4   | b2b3b4°b4b6b7°b7b7y1y3°y3y5y6y11y14                                                                           | 1548.80 | 49.812  | 31639   | 3 | 516.94 | -9.537  |
| P62736 ACTA_HUMAN Actin | 11 |                                        | HQGVVMGMGQKDSYVGDEAQS<br>K | 41  | 22 | 7  | 35.52  | b3b12b13b14y14°y14y22                                                                                         | 2351.05 | 58.706  | 24855   | 3 | 784.36 | -10.488 |
| P62736 ACTA_HUMAN Actin | 12 | Carbamidomethyl+C(2);<br>Oxidation+M() | LCYVALDFENEMATAAASSSLEK    | 217 | 23 | 5  | 21.15  | b9b10°b10y8°y8                                                                                                | 2552.18 | 136.351 | 1800    | 3 | 851.40 | 8.705   |
| P68032 ACTC_HUMAN Actin | 1  |                                        | AGFAGDDAPR                 | 20  | 10 | 21 | 139.38 | b1b2b3b4b7°b7b8y1y2y3y4°y4y5y6°y6y7°y7y8y9°y9y10                                                              | 976.44  | 30.905  | 1848250 | 2 | 488.73 | -5.126  |
| P68032 ACTC_HUMAN Actin | 2  |                                        | SYELPDGQVITIGNER           | 240 | 16 | 39 | 218.65 | b2b3°b3b4°b4b5°b5b8°b8b9°b9b10b12°b12b13y1y2°y2y4°y4°y4y5°y5y6°y6°y6y7°y7y8y10°y10y11°y11y12°y12°y12y13y14y16 | 1790.88 | 71.814  | 1483661 | 2 | 895.94 | -5.589  |
| P68032 ACTC_HUMAN Actin | 3  |                                        | EITALAPSTMK                | 317 | 11 | 23 | 116.62 | b1b2°b2b3°b3b4°b4b6y1y2y3°y3y4°y4y5°y5y6°y6y7y8y9°y9y11                                                       | 1161.61 | 50.535  | 1126399 | 2 | 581.31 | -5.780  |
| P68032 ACTC_HUMAN Actin | 4  |                                        | YPIEHGITNWDDMEK            | 70  | 16 | 32 | 226.43 | b2b3b4b8b9b11°b11b12°b12b14b15b16y1y2°y2y3y4y5y6°y6y7°y7y8°y8y12°y12y13y14y15°y15°y15y16                      | 1960.92 | 66.672  | 937839  | 2 | 980.96 | 3.113   |
| P68032 ACTC_HUMAN Actin | 5  |                                        | AVFPSIVGRPR                | 30  | 11 | 15 | 104.96 | b1b2b3b9y1y2y3y4y5y6y7y8°y8y9y11                                                                              | 1198.70 | 55.696  | 666000  | 2 | 599.85 | -3.666  |



|                                           |    |                                                                               |                              |     |    |    |        |                                                                                                               |         |         |         |   |         |         |
|-------------------------------------------|----|-------------------------------------------------------------------------------|------------------------------|-----|----|----|--------|---------------------------------------------------------------------------------------------------------------|---------|---------|---------|---|---------|---------|
| P68032 ACTC_HUMAN Actin                   | 6  |                                                                               | HQGVVMVGMGQK                 | 41  | 11 | 24 | 149.31 | b1b2*b2b3b4*b4b5b6b7b11y1y2*y2y3*y3y4*y4y5y6y7y9y10*y10y11                                                    | 1171.57 | 33.049  | 379414  | 2 | 586.29  | 0.729   |
| P68032 ACTC_HUMAN Actin                   | 7  |                                                                               | DLTDYLMK                     | 185 | 8  | 10 | 46.48  | b2*b2b7b8y1y2y4y5y6y8                                                                                         | 998.48  | 70.685  | 351130  | 2 | 499.74  | -8.252  |
| P68032 ACTC_HUMAN Actin                   | 8  |                                                                               | IIAPPERK                     | 330 | 8  | 12 | 71.39  | b2b3y2y3y4*y4y5*y5y6*y6y7y8                                                                                   | 923.56  | 26.694  | 116314  | 2 | 462.28  | -8.525  |
| P68032 ACTC_HUMAN Actin                   | 9  |                                                                               | IIAPPER                      | 330 | 7  | 5  | 50.77  | y3y4y5y6y7                                                                                                    | 795.47  | 33.226  | 50492   | 2 | 398.24  | -8.517  |
| P68032 ACTC_HUMAN Actin                   | 10 |                                                                               | MQKEITALAPSTMK               | 314 | 14 | 15 | 74.4   | b2b3b4*b4b6b7*b7*b7y1y3*y3y5y6y11y14                                                                          | 1548.80 | 49.812  | 31639   | 3 | 516.94  | -9.537  |
| P68032 ACTC_HUMAN Actin                   | 11 |                                                                               | HQGVVMVGMGQKDSYVGDFAQSK      | 41  | 22 | 7  | 35.52  | b3b12b13b14y14*y14y22                                                                                         | 2351.05 | 58.706  | 24855   | 3 | 784.36  | -10.488 |
| P68032 ACTC_HUMAN Actin                   | 12 | Carbamidomethyl+C(1)                                                          | CPETLFQPSFIGMESAGIHETTYNSIMK | 258 | 28 | 4  | 11.15  | b9y9y11*y11                                                                                                   | 3188.52 | 126.445 | 4558    | 3 | 1063.51 | 15.850  |
| P68032 ACTC_HUMAN Actin                   | 13 |                                                                               | GYSFVTTAER                   | 198 | 10 | 3  | 24.99  | b4y3y7                                                                                                        | 1130.53 | 65.830  | 2275    | 1 | 1130.53 | -15.009 |
| P68032 ACTC_HUMAN Actin                   | 14 | Carbamidomethyl+C(2)                                                          | LCYVALDFENEMATAASSSSLEK      | 217 | 23 | 7  | 22.09  | b5b12y4*y4y7y10*y10                                                                                           | 2536.17 | 95.477  | 2161    | 3 | 846.06  | 2.984   |
| P68032 ACTC_HUMAN Actin                   | 15 | Oxidation+M(O)                                                                | DLYANNVLSSGGTMYPGIADR        | 293 | 21 | 4  | 12.79  | b8*b8b14y12                                                                                                   | 2244.09 | 68.054  | 4042    | 3 | 748.70  | 14.796  |
| P63267 ACTH_HUMAN Actin                   | 1  |                                                                               | AGFAGDDAPR                   | 19  | 10 | 21 | 139.38 | b1b2b3b4b7*b7b8y1y2y3y4*y4y5y6*y6y7*y7y8y9*y9y10                                                              | 976.44  | 30.905  | 1848250 | 2 | 488.73  | -5.126  |
| P63267 ACTH_HUMAN Actin                   | 2  |                                                                               | SYELPDGQVITIGNER             | 239 | 16 | 39 | 218.65 | b2b3*b3b4*b4b5*b5b8*b8b9*b9b10b12*b12b13y1y2*y2y4*y4*y4y5*y5y6*y6*y6y7*y7y8y10*y10y11*y11y12*y12*y12y13y14y16 | 1790.88 | 71.814  | 1483661 | 2 | 895.94  | -5.589  |
| P63267 ACTH_HUMAN Actin                   | 3  |                                                                               | EITALAPSTMK                  | 316 | 11 | 23 | 116.62 | b1b2*b2b3*b3b4*b4b6y1y2y3*y3y4*y4y5*y5y6*y6y7y8y9*y9y11                                                       | 1161.61 | 50.535  | 1126399 | 2 | 581.31  | -5.780  |
| P63267 ACTH_HUMAN Actin                   | 4  |                                                                               | YPIEHGIITNWDDMEK             | 69  | 16 | 32 | 226.43 | b2b3b4b8b9b11*b11b12*b12b14b15b16y1y2*y2y3y4y5y6*y6y7*y7y8*y8y12*y12y13y14y15*y15*y15y16                      | 1960.92 | 66.672  | 937839  | 2 | 980.96  | 3.113   |
| P63267 ACTH_HUMAN Actin                   | 5  |                                                                               | AVFPSIVGRPR                  | 29  | 11 | 15 | 104.96 | b1b2b3b9y1y2y3y4y5y6y7y8*y8y9y11                                                                              | 1198.70 | 55.696  | 666000  | 2 | 599.85  | -3.666  |
| P63267 ACTH_HUMAN Actin                   | 6  |                                                                               | HQGVVMVGMGQK                 | 40  | 11 | 24 | 149.31 | b1b2*b2b3b4*b4b5b6b7b11y1y2*y2y3*y3y4*y4y5y6y7y9y10*y10y11                                                    | 1171.57 | 33.049  | 379414  | 2 | 586.29  | 0.729   |
| P63267 ACTH_HUMAN Actin                   | 7  |                                                                               | DLTDYLMK                     | 184 | 8  | 10 | 46.48  | b2*b2b7b8y1y2y4y5y6y8                                                                                         | 998.48  | 70.685  | 351130  | 2 | 499.74  | -8.252  |
| P63267 ACTH_HUMAN Actin                   | 8  |                                                                               | IIAPPERK                     | 329 | 8  | 12 | 71.39  | b2b3y2y3y4*y4y5*y5y6*y6y7y8                                                                                   | 923.56  | 26.694  | 116314  | 2 | 462.28  | -8.525  |
| P63267 ACTH_HUMAN Actin                   | 9  |                                                                               | IIAPPER                      | 329 | 7  | 5  | 50.77  | y3y4y5y6y7                                                                                                    | 795.47  | 33.226  | 50492   | 2 | 398.24  | -8.517  |
| P63267 ACTH_HUMAN Actin                   | 10 |                                                                               | MQKEITALAPSTMK               | 313 | 14 | 15 | 74.4   | b2b3b4*b4b6b7*b7*b7y1y3*y3y5y6y11y14                                                                          | 1548.80 | 49.812  | 31639   | 3 | 516.94  | -9.537  |
| P63267 ACTH_HUMAN Actin                   | 11 |                                                                               | HQGVVMVGMGQKDSYVGDFAQSK      | 40  | 22 | 7  | 35.52  | b3b12b13b14y14*y14y22                                                                                         | 2351.05 | 58.706  | 24855   | 3 | 784.36  | -10.488 |
| P63267 ACTH_HUMAN Actin                   | 12 | Carbamidomethyl+C(1);<br>Carbamidomethyl+C(10);<br>Carbamidomethyl+C(17)<br>) | CEEETALVCDNGSGLCK            | 1   | 18 | 5  | 19.66  | b8b10*b10y6y9                                                                                                 | 2042.86 | 67.051  | 16883   | 2 | 1021.93 | 5.856   |
| P63267 ACTH_HUMAN Actin                   | 13 | Carbamidomethyl+C(2);<br>Oxidation+M(O)                                       | LCYVALDFENEMATAASSSSLEK      | 216 | 23 | 4  | 24.82  | b3b4y11y14                                                                                                    | 2552.19 | 99.080  | 10026   | 3 | 851.40  | 13.106  |
| P68366 TBA4A_HUMAN Tubulin alpha-4A chain | 1  |                                                                               | VGINYQPPTVPPGDLAK            | 352 | 18 | 15 | 87.73  | b5b6*b6b7b8b10b11*b11y1y2y3y7y8y12y18                                                                         | 1824.99 | 65.711  | 206983  | 2 | 913.00  | 0.134   |

|                                           |    |                                                                                               |                                              |     |    |    |        |                                                                                                |         |         |        |   |         |         |
|-------------------------------------------|----|-----------------------------------------------------------------------------------------------|----------------------------------------------|-----|----|----|--------|------------------------------------------------------------------------------------------------|---------|---------|--------|---|---------|---------|
| P68366[TBA4A_HUMAN Tubulin alpha-4A chain | 2  |                                                                                               | AVFVDLEPTVIDEIR                              | 64  | 15 | 25 | 173.02 | b2b4b5°b5b6b7°b7b10°b10b11b12y1y2y3°y3y4°y4y5y8y9°y9y10y11y13y15                               | 1715.92 | 89.104  | 185366 | 2 | 858.46  | -0.996  |
| P68366[TBA4A_HUMAN Tubulin alpha-4A chain | 3  |                                                                                               | QLFHPEQLITGKEDAANNYAR                        | 84  | 21 | 15 | 73.71  | b2b6°b6y1y3y5y6y7°y7y9y10y12y14y21°y21                                                         | 2415.17 | 61.978  | 173887 | 4 | 604.55  | -13.444 |
| P68366[TBA4A_HUMAN Tubulin alpha-4A chain | 4  |                                                                                               | NLDIRPTYTNLNR                                | 215 | 14 | 17 | 62.25  | b2°b2b3b11y2y4°y4y5y7°y7y8°y8y10°y10y14°y14                                                    | 1718.86 | 52.575  | 137426 | 3 | 573.63  | -10.440 |
| P68366[TBA4A_HUMAN Tubulin alpha-4A chain | 5  | Carbamidomethyl+C(8)                                                                          | SIQFVDWCPTGFK                                | 339 | 13 | 23 | 146.29 | b2b3°b3b4b5°b5°b5b6°b6°b6y1y3y4y5°y5y6y7°y7y8y9°y9y10y13                                       | 1584.75 | 82.734  | 121637 | 2 | 792.88  | 1.849   |
| P68366[TBA4A_HUMAN Tubulin alpha-4A chain | 6  |                                                                                               | IHFPLATYAPVISAEK                             | 264 | 16 | 6  | 32.84  | b1b2y4y5y7y14                                                                                  | 1756.94 | 78.230  | 119177 | 3 | 586.32  | -11.533 |
| P68366[TBA4A_HUMAN Tubulin alpha-4A chain | 7  |                                                                                               | EIIDPVLDR                                    | 112 | 9  | 4  | 36.27  | y2y5y6y7                                                                                       | 1069.58 | 59.690  | 73529  | 2 | 535.30  | -5.022  |
| P68366[TBA4A_HUMAN Tubulin alpha-4A chain | 8  | Carbamidomethyl+C(15)                                                                         | AYHEQLSVAEITNACFEPANQMV<br>K                 | 280 | 24 | 9  | 39.35  | b7b10b11y1y4y7y9y11y24                                                                         | 2750.31 | 73.355  | 59845  | 3 | 917.44  | 5.060   |
| P68366[TBA4A_HUMAN Tubulin alpha-4A chain | 9  |                                                                                               | LISQIVSSITASLR                               | 229 | 14 | 7  | 54.36  | b4b5b6y4y5y8y14                                                                                | 1487.88 | 100.003 | 52439  | 2 | 744.44  | 1.887   |
| P68366[TBA4A_HUMAN Tubulin alpha-4A chain | 10 |                                                                                               | FDGALNVDLTEFQTNLVPYPR                        | 243 | 21 | 7  | 33.99  | b2b17y2y4y5y6y21                                                                               | 2409.22 | 94.857  | 48004  | 2 | 1205.11 | 5.675   |
| P68366[TBA4A_HUMAN Tubulin alpha-4A chain | 11 |                                                                                               | LSVDYGKK                                     | 156 | 8  | 5  | 51.25  | y3y4y5y7y8                                                                                     | 909.50  | 29.494  | 31401  | 2 | 455.25  | -7.717  |
| P68366[TBA4A_HUMAN Tubulin alpha-4A chain | 12 | Carbamidomethyl+C(3);<br>Carbamidomethyl+C(19)<br>;Carbamidomethyl+C(24)<br>)                 | RECISVHVQGAGVQMGNACWEL<br>YCLEHGIQPDGQMPSDK  | 1   | 39 | 6  | 21.98  | b13y3y4°y4y7y10                                                                                | 4456.95 | 114.707 | 2758   | 6 | 743.66  | -10.955 |
| P68366[TBA4A_HUMAN Tubulin alpha-4A chain | 13 |                                                                                               | AFVHWYVGEEMEEGFSEARED<br>MAALEK              | 402 | 28 | 4  | 23.8   | b7b14y11y12                                                                                    | 3217.47 | 94.241  | 2736   | 3 | 1073.16 | 13.431  |
| P68366[TBA4A_HUMAN Tubulin alpha-4A chain | 14 |                                                                                               | EDMAALEK                                     | 422 | 8  | 3  | 31.02  | b6y3y4                                                                                         | 906.42  | 36.348  | 59644  | 2 | 453.72  | -1.077  |
| P68366[TBA4A_HUMAN Tubulin alpha-4A chain | 15 |                                                                                               | NGPYRQLFHPEQLITGK                            | 79  | 17 | 3  | 14.93  | b5b10y10                                                                                       | 1998.04 | 61.314  | 44333  | 2 | 999.53  | -6.354  |
| P68366[TBA4A_HUMAN Tubulin alpha-4A chain | 16 | Carbamidomethyl+C(4);<br>Carbamidomethyl+C(20)<br>;Carbamidomethyl+C(25)<br>);Oxidation+M(36) | MRECISVHVQGAGVQMGNACWE<br>LYCLEHGIQPDGQMPSDK | 0   | 40 | 7  | 14.21  | b7b10y4y6°y6y12°y12                                                                            | 4604.08 | 86.011  | 10520  | 4 | 1151.78 | 10.606  |
| P68366[TBA4A_HUMAN Tubulin alpha-4A chain | 17 |                                                                                               | AFVHWYVGEEMEEGFSE                            | 402 | 18 | 0  | 11.05  |                                                                                                | 2102.90 | 94.203  | 6268   | 3 | 701.64  | 9.520   |
| P68366[TBA4A_HUMAN Tubulin alpha-4A chain | 18 |                                                                                               | EIIDPVLDR                                    | 112 | 9  | 0  | 1.92   |                                                                                                | 1051.57 | 59.690  | 4447   | 2 | 526.29  | -3.715  |
| P68366[TBA4A_HUMAN Tubulin alpha-4A chain | 19 |                                                                                               | AVFVDLEPTVIDEIR                              | 64  | 15 | 0  | 4.8    |                                                                                                | 1697.89 | 89.098  | 3495   | 3 | 566.63  | -11.359 |
| I18206[VINC_HUMAN Vinculin                | 1  |                                                                                               | TIESILEPVAQQISHLVIMHEEGEV<br>DGK             | 7   | 28 | 36 | 251.21 | b1°b1b2°b2b3°b3b4°b4b5°b5b6°b6y1y2y3y4y5°y5y6y7y8°y8y9y10y11y12y13y14y15y21y22°y22y23y25y26y28 | 3101.55 | 110.636 | 281159 | 4 | 776.14  | -11.650 |
| I18206[VINC_HUMAN Vinculin                | 2  |                                                                                               | LTDELAPPKPLPEGEVPPPPPP<br>EEK                | 853 | 28 | 5  | 25.52  | y2y6y10y11y22                                                                                  | 3023.59 | 60.622  | 163051 | 4 | 756.65  | -5.491  |
| I18206[VINC_HUMAN Vinculin                | 3  |                                                                                               | AIPDLTAPVAAVQAASNLVR                         | 35  | 21 | 23 | 142.59 | b2b4°b4b6b7°b7b16°b16y1y2y3y4°y4y5y6y7y8y12y14y15y16y19y21                                     | 2076.19 | 118.074 | 133453 | 2 | 1038.60 | 3.057   |
| I18206[VINC_HUMAN Vinculin                | 4  |                                                                                               | QVATALQNLQTK                                 | 464 | 12 | 16 | 94.54  | b2b3°b3b12y2y3°y3°y3y4y5y6°y6y7y9y10y12                                                        | 1314.74 | 48.566  | 129480 | 2 | 657.87  | -0.836  |

|                             |    |                                |      |    |    |        |                                                                      |         |         |        |   |         |         |
|-----------------------------|----|--------------------------------|------|----|----|--------|----------------------------------------------------------------------|---------|---------|--------|---|---------|---------|
| IP18206 VINC_HUMAN Vinculin | 5  | AQVVSQGLDVLTA                  | 352  | 14 | 22 | 129.16 | b1b2*b2b3b4b5*b5b6b9*b9b1<br>2b14y1y2y3y4y8y10y11y12*y<br>12y14      | 1457.80 | 58.017  | 121569 | 2 | 729.40  | 0.251   |
| IP18206 VINC_HUMAN Vinculin | 6  | GWLRDPSASPGDAGEQAIR            | 281  | 19 | 15 | 86.83  | b2b4b5b8b9*b9y1y2y3y6y7y9<br>y10y11y19                               | 1982.96 | 53.632  | 104159 | 3 | 661.66  | -4.063  |
| IP18206 VINC_HUMAN Vinculin | 7  | TNISDEESEQATEMLVHNAQNL<br>MSVK | 1076 | 27 | 15 | 55.42  | b2*b2*b2b3b4*b4*b4y1y3y11<br>y12y22y24y25y27                         | 3046.41 | 96.388  | 101285 | 3 | 1016.14 | 1.362   |
| IP18206 VINC_HUMAN Vinculin | 8  | AVAGNISDPGLQK                  | 802  | 13 | 16 | 154.94 | b2b3b4b5b6b8y4y5*y5y6y7y8<br>y9y10y11y13                             | 1269.68 | 40.302  | 97212  | 2 | 635.34  | -1.827  |
| IP18206 VINC_HUMAN Vinculin | 9  | ALASQLQDSLK                    | 570  | 11 | 10 | 52.59  | b2b3y3y5*y5y6y9*y9*y9y11                                             | 1173.65 | 54.566  | 93288  | 2 | 587.33  | -1.872  |
| IP18206 VINC_HUMAN Vinculin | 10 | VAMANIQPQLVAGATSIAR            | 738  | 20 | 14 | 91.19  | b3b4b5*b5b15y2y3y5y7y8y13<br>y14y15y20                               | 2042.10 | 84.153  | 87655  | 2 | 1021.55 | 4.125   |
| IP18206 VINC_HUMAN Vinculin | 11 | ELTPQVVSAAR                    | 669  | 11 | 15 | 116.62 | b2b3*b3b4*b4b10y3y4y5y6y7y<br>8*y8y9y11                              | 1170.65 | 45.872  | 84866  | 2 | 585.83  | 1.773   |
| IP18206 VINC_HUMAN Vinculin | 12 | VLQLTSWDEDAWASK                | 246  | 15 | 7  | 36.86  | b1b12y6y8y11y12y15                                                   | 1748.85 | 79.570  | 78528  | 2 | 874.93  | 1.815   |
| IP18206 VINC_HUMAN Vinculin | 13 | VMLVNSMNTVK                    | 188  | 11 | 8  | 44.35  | b2b3b6*b6y7y9y10y11                                                  | 1235.65 | 54.791  | 76830  | 2 | 618.33  | 1.087   |
| IP18206 VINC_HUMAN Vinculin | 14 | ELLPVILISAMK                   | 199  | 11 | 8  | 34.12  | b2*b2b3y2y4y5y8y11                                                   | 1213.72 | 91.413  | 75107  | 2 | 607.36  | -5.934  |
| IP18206 VINC_HUMAN Vinculin | 15 | MTGLVDEAIDTK                   | 708  | 12 | 10 | 64.86  | b2*b2b4y2y3y6y7y10y11y12                                             | 1292.64 | 57.566  | 68910  | 2 | 646.82  | -1.700  |
| IP18206 VINC_HUMAN Vinculin | 16 | ETVQTTEQILKR                   | 59   | 13 | 15 | 88     | b2*b2y1y2y3y4y5y7y8*y8y9y1<br>0*y10*y10y13                           | 1560.81 | 46.884  | 66741  | 3 | 520.94  | -8.368  |
| IP18206 VINC_HUMAN Vinculin | 17 | STVEGIQASVK                    | 655  | 11 | 11 | 66.81  | b2*b2b9*b9y1y3y4y7y8y9y11                                            | 1118.60 | 39.878  | 66123  | 2 | 559.80  | -3.820  |
| IP18206 VINC_HUMAN Vinculin | 18 | LVQAAQLQSDPYSPAR               | 87   | 18 | 20 | 113.58 | b1b10b13b14*b14b15*b15y3y<br>5y7y8*y8y10*y10y11*y11*y11<br>y12y13y18 | 1974.02 | 65.868  | 62848  | 2 | 987.51  | 4.700   |
| IP18206 VINC_HUMAN Vinculin | 19 | MLGQMTDQVADLR                  | 326  | 13 | 14 | 99.21  | b2b6b13y1y2y3y4y6y8y9y11*<br>y11y12y13                               | 1477.72 | 62.896  | 58956  | 2 | 739.36  | 3.387   |
| IP18206 VINC_HUMAN Vinculin | 20 | LLAVAATAPPDAPNR                | 607  | 15 | 9  | 83.63  | b2b8y3y4y7y8y9y10y11                                                 | 1476.82 | 51.022  | 56249  | 2 | 738.92  | 4.133   |
| IP18206 VINC_HUMAN Vinculin | 21 | AGEVINQPMMAAR                  | 889  | 14 | 22 | 180.33 | b3b4b5b6b7*b7*b7b10*b10b1<br>2*b12b13*b13y3y4y5y6y7y9*<br>y9y10y14   | 1518.73 | 58.638  | 53113  | 2 | 759.87  | 3.376   |
| IP18206 VINC_HUMAN Vinculin | 22 | WIDNPTVDDR                     | 502  | 10 | 7  | 36.65  | b3b7*b7y2y6y8y10                                                     | 1230.58 | 48.030  | 51111  | 2 | 615.79  | 1.488   |
| IP18206 VINC_HUMAN Vinculin | 23 | MALLMAEMSR                     | 993  | 10 | 16 | 126.93 | b3b4b6b7b10*b10y1y2y4y5*y<br>5y6y7y8y9y10                            | 1152.56 | 72.524  | 48552  | 2 | 576.78  | -0.424  |
| IP18206 VINC_HUMAN Vinculin | 24 | MQEAMTQEVSDVFSDTTPIK           | 586  | 21 | 4  | 22.44  | y3y8y9y21                                                            | 2358.10 | 80.570  | 45919  | 2 | 1179.55 | 6.316   |
| IP18206 VINC_HUMAN Vinculin | 25 | GQGSSPVAMQK                    | 341  | 11 | 16 | 92.51  | b2*b2b4b7*b7*b7b11y1y3y4*<br>y4y6y7y8y9y11                           | 1089.53 | 26.537  | 32046  | 2 | 545.27  | -1.345  |
| IP18206 VINC_HUMAN Vinculin | 26 | GILSGTSDLLTFDEAEVR             | 113  | 19 | 7  | 30.58  | b7y2y5y6*y6y12y15                                                    | 2036.06 | 100.516 | 19584  | 2 | 1018.54 | 4.497   |
| IP18206 VINC_HUMAN Vinculin | 27 | GNDIAAAKR                      | 983  | 10 | 4  | 26.75  | b3y5y6y10                                                            | 1028.59 | 32.538  | 15755  | 2 | 514.80  | 0.237   |
| IP18206 VINC_HUMAN Vinculin | 28 | DPSASPGDAGEQAIR                | 285  | 15 | 4  | 22.62  | b10y2y10y11                                                          | 1470.69 | 35.102  | 13191  | 2 | 735.85  | 4.399   |
| IP18206 VINC_HUMAN Vinculin | 29 | SFLDSGYR                       | 815  | 8  | 6  | 51.25  | y3y4y5*y5y6y8                                                        | 944.46  | 51.806  | 12995  | 1 | 944.46  | 14.605  |
| IP18206 VINC_HUMAN Vinculin | 30 | GNDIAAAK                       | 983  | 9  | 6  | 42.7   | b5*b5b6b8b9y4                                                        | 872.48  | 26.587  | 6582   | 2 | 436.74  | -7.555  |
| IP18206 VINC_HUMAN Vinculin | 31 | NOGIEEALK                      | 219  | 9  | 7  | 42.7   | b6b7b8*b8y2y5*y5                                                     | 1001.53 | 41.732  | 5483   | 1 | 1001.53 | 2.194   |
| IP18206 VINC_HUMAN Vinculin | 32 | ALASQLQDSLKDLK                 | 570  | 14 | 3  | 17.67  | b9y3y12                                                              | 1529.84 | 106.351 | 3247   | 2 | 765.42  | -8.139  |
| IP18206 VINC_HUMAN Vinculin | 33 | GVGQAAIR                       | 512  | 8  | 4  | 34.03  | b3y4y6y8                                                             | 771.44  | 25.855  | 2686   | 2 | 386.23  | -3.323  |
| IP18206 VINC_HUMAN Vinculin | 34 | VLQLTSWDEDAWASKDTEAMK          | 246  | 21 | 3  | 12.79  | b11y5y10                                                             | 2424.14 | 74.626  | 2323   | 2 | 1212.57 | 1.108   |
| IP18206 VINC_HUMAN Vinculin | 35 | AVANSRPAK                      | 479  | 9  | 3  | 36.27  | b4b6b7                                                               | 913.53  | 56.789  | 45495  | 2 | 457.27  | 6.080   |
| IP18206 VINC_HUMAN Vinculin | 36 | ALASIDSK                       | 268  | 8  | 3  | 34.03  | b6y3y6                                                               | 804.43  | 30.986  | 22322  | 2 | 402.72  | -14.112 |
| IP18206 VINC_HUMAN Vinculin | 37 | VDQLTAQLADLAAR                 | 547  | 14 | 5  | 26.24  | b7*b7b10*b10b12                                                      | 1484.81 | 75.216  | 17699  | 2 | 742.91  | 1.809   |
| IP18206 VINC_HUMAN Vinculin | 38 | QDLLAK                         | 538  | 6  | 3  | 25.39  | b3*b3y3                                                              | 687.40  | 59.941  | 16059  | 1 | 687.40  | -2.841  |
| IP18206 VINC_HUMAN Vinculin | 39 | NPGNQAAAYEHFETMK               | 684  | 15 | 6  | 36.86  | b4*b4y4y5y9y11                                                       | 1736.75 | 53.192  | 10182  | 2 | 868.88  | -9.278  |
| IP18206 VINC_HUMAN Vinculin | 40 | GILEYLTVAEVVETMEDLVITYTK       | 139  | 23 | 3  | 12.12  | b17y4y11                                                             | 2616.34 | 136.899 | 8067   | 3 | 872.78  | 0.373   |
| IP18206 VINC_HUMAN Vinculin | 41 | LANVMMGPYR                     | 528  | 10 | 3  | 24.99  | b5b8y4                                                               | 1151.59 | 50.494  | 7431   | 2 | 576.30  | 17.173  |
| IP18206 VINC_HUMAN Vinculin | 42 | AANFENHSGK                     | 629  | 10 | 4  | 39.76  | y4y6y9*y9                                                            | 1074.49 | 27.491  | 6564   | 2 | 537.75  | -2.045  |

|                                               |    |                       |                                 |     |    |    |        |                                                                  |         |         |        |   |         |         |
|-----------------------------------------------|----|-----------------------|---------------------------------|-----|----|----|--------|------------------------------------------------------------------|---------|---------|--------|---|---------|---------|
| P18206 VINC_HUMAN Vinculin                    | 43 |                       | LNQAK                           | 276 | 5  | 1  | 12.45  | b3                                                               | 573.34  | 89.689  | 5468   | 1 | 573.34  | -0.532  |
| P18206 VINC_HUMAN Vinculin                    | 44 |                       | ETVQTTEQILK                     | 59  | 12 | 4  | 20.51  | b3b5*b5y5                                                        | 1404.71 | 49.798  | 5299   | 2 | 702.86  | -7.300  |
| P18206 VINC_HUMAN Vinculin                    | 45 |                       | DTEAMK                          | 261 | 6  | 1  | 12.93  | b4                                                               | 694.31  | 30.865  | 4903   | 1 | 694.31  | 10.022  |
| P18206 VINC_HUMAN Vinculin                    | 46 |                       | TISPMVMDAK                      | 792 | 10 | 10 | 89.57  | b3b5b8y3*y3y4*y4y7*y7y8                                          | 1092.54 | 43.709  | 3133   | 2 | 546.77  | -5.922  |
| P18206 VINC_HUMAN Vinculin                    | 47 |                       | NQWIDNVEK                       | 699 | 9  | 6  | 28.49  | b4y5*y5*y5y6*y6                                                  | 1145.55 | 21.905  | 2417   | 2 | 573.28  | -11.082 |
| P18206 VINC_HUMAN Vinculin                    | 48 |                       | LANVMMGPYRQDLAK                 | 528 | 16 | 7  | 47.34  | b3b4b5b8*b8b11*b11                                               | 1819.97 | 116.289 | 314401 | 3 | 607.33  | 9.323   |
| P18206 VINC_HUMAN Vinculin                    | 49 | Carbamidomethyl+C(5)  | VENACTKL VQAAQMLQSDPYSV P<br>AR | 80  | 25 | 3  | 11.62  | b7b13y10                                                         | 2776.38 | 91.553  | 227140 | 3 | 926.13  | 1.407   |
| P18206 VINC_HUMAN Vinculin                    | 50 |                       | NQWIDNVEKMTGLVDEAIDTK           | 699 | 21 | 3  | 12.79  | b5y4y8                                                           | 2419.22 | 67.086  | 96730  | 3 | 807.08  | 14.431  |
| P18206 VINC_HUMAN Vinculin                    | 51 |                       | KIDAAQNWLADPNGGPEGEEQIR         | 386 | 23 | 15 | 88.71  | b6b7*b7b10b11b15y3y5y6*y6<br>y9y10y12*y12y14                     | 2508.21 | 62.017  | 71163  | 3 | 836.74  | -1.363  |
| P18206 VINC_HUMAN Vinculin                    | 52 | Carbamidomethyl+C(1)  | CDRVDQLTAQLADLAAR               | 544 | 17 | 11 | 83.83  | b3b5b7b8b14*b14*b14y4y5y6<br>y7                                  | 1915.94 | 79.551  | 51297  | 3 | 639.32  | -14.590 |
| P18206 VINC_HUMAN Vinculin                    | 53 |                       | LLAVAATAPPDAPNREEVFDER          | 607 | 22 | 6  | 36.01  | b3y7y10y11y14y16                                                 | 2381.21 | 61.903  | 50852  | 3 | 794.41  | -1.128  |
| P18206 VINC_HUMAN Vinculin                    | 54 | Carbamidomethyl+C(13) | QILDEAGKVGELCAGK                | 300 | 16 | 3  | 23.4   | y4y6y13                                                          | 1687.85 | 54.748  | 34590  | 3 | 563.29  | -10.342 |
| P18206 VINC_HUMAN Vinculin                    | 55 |                       | ARMQEAMTQEVSDVFSDTTPIK          | 584 | 23 | 6  | 22.1   | b6b7*b7*b7b11y12                                                 | 2585.25 | 75.344  | 27532  | 3 | 862.42  | 9.633   |
| P18206 VINC_HUMAN Vinculin                    | 56 |                       | EVENSEDPKFR                     | 769 | 11 | 4  | 29.45  | y3y4y8*y8                                                        | 1349.62 | 29.333  | 14581  | 3 | 450.54  | -13.205 |
| P18206 VINC_HUMAN Vinculin                    | 57 |                       | ARGQGSSPVAMQK                   | 339 | 13 | 3  | 23.72  | b7b8y11                                                          | 1316.66 | 62.066  | 11772  | 2 | 658.83  | -11.404 |
| P18206 VINC_HUMAN Vinculin                    | 58 | Carbamidomethyl+C(13) | DMPPAFIKVENACTK                 | 72  | 15 | 4  | 16.6   | b4b6y3*y3                                                        | 1720.82 | 71.035  | 11566  | 3 | 574.28  | -12.414 |
| P18206 VINC_HUMAN Vinculin                    | 59 |                       | MSAEINEIIRVLQLTSWDEDAWAS<br>K   | 236 | 25 | 3  | 21.17  | b9y5y6                                                           | 2905.40 | 119.099 | 9773   | 3 | 969.14  | -14.789 |
| P18206 VINC_HUMAN Vinculin                    | 60 |                       | MAKMIDER                        | 170 | 8  | 4  | 51.25  | b4b6y3y5                                                         | 993.48  | 32.096  | 3751   | 2 | 497.24  | -10.383 |
| P18206 VINC_HUMAN Vinculin                    | 61 |                       | AVAGNISDPGLQKSFDSGYR            | 802 | 21 | 5  | 21.24  | b8*b8*b8b9y6                                                     | 2195.11 | 74.468  | 2000   | 3 | 732.37  | -1.780  |
| P18206 VINC_HUMAN Vinculin                    | 62 |                       | AGEVINQPMMAARQLHDEAR            | 889 | 21 | 5  | 17.07  | b7b9y7*y7y10                                                     | 2368.13 | 55.658  | 1579   | 6 | 395.53  | -2.165  |
| P18206 VINC_HUMAN Vinculin                    | 63 |                       | DYLDGSRGILSGTSDLLTFDEAE<br>VR   | 105 | 27 | 6  | 34.07  | b6b9b10*b10b11y6                                                 | 2955.47 | 117.366 | 1510   | 3 | 985.83  | -7.352  |
| P18206 VINC_HUMAN Vinculin                    | 64 | Phosphoryl STY(8)     | ELTPQVVSAAR                     | 669 | 11 | 4  | 22.46  | b3*b3b8_H3PO4 b8y3                                               | 1250.60 | 99.030  | 9157   | 2 | 625.81  | -0.586  |
| P18206 VINC_HUMAN Vinculin                    | 65 | Phosphoryl STY(6)     | GILSGTSDLLTFDEAEVR              | 113 | 19 | 5  | 30.58  | b5b6b13b17y12                                                    | 2115.99 | 71.069  | 1833   | 2 | 1058.50 | -11.769 |
| P18206 VINC_HUMAN Vinculin                    | 66 | Oxidation+M(5)        | MLGQMTDQVADLR                   | 326 | 13 | 3  | 26.43  | y4y9y10                                                          | 1493.73 | 30.220  | 13994  | 3 | 498.58  | 12.667  |
| P18206 VINC_HUMAN Vinculin                    | 67 |                       | AQQVSQGLD                       | 352 | 9  | 2  | 7.23   | y8*y8                                                            | 945.46  | 57.971  | 6712   | 2 | 473.23  | -7.101  |
| P18206 VINC_HUMAN Vinculin                    | 68 |                       | PDLTAPVAAVQAASNLVR              | 37  | 19 | 11 | 88.73  | b4*b4b5*b5b6b7b8*b8b9b10b<br>12                                  | 1892.04 | 118.081 | 3822   | 3 | 631.35  | -12.387 |
| P18206 VINC_HUMAN Vinculin                    | 69 |                       | ETVQTTEQILKR                    | 59  | 13 | 0  | 3.84   |                                                                  | 1543.81 | 46.877  | 24848  | 3 | 515.27  | 9.647   |
| P18206 VINC_HUMAN Vinculin                    | 70 |                       | ELLPVLISAMK                     | 199 | 11 | 0  | 2.88   |                                                                  | 1195.70 | 91.409  | 4551   | 2 | 598.35  | -7.351  |
| P18206 VINC_HUMAN Vinculin                    | 71 |                       | AQQVSQGLDVLTAK                  | 352 | 14 | 1  | 7.23   | y6                                                               | 1439.79 | 58.009  | 3348   | 3 | 480.60  | 8.224   |
| P18206 VINC_HUMAN Vinculin                    | 72 |                       | ELTPQVVSAAAR                    | 669 | 11 | 0  | 2.88   |                                                                  | 1152.62 | 45.893  | 2556   | 2 | 576.81  | -8.578  |
| P68363 TBA1B_HUMAN Tubulin alpha-<br>1B chain | 1  |                       | AVFVDLEPTVIDEVR                 | 64  | 15 | 21 | 168.35 | b3b4b5b6b7y1y2y3*y3y4y5*y5<br>y6y8y9*y9y10y11*y11y12y15          | 1701.91 | 84.403  | 210134 | 2 | 851.46  | 1.219   |
| P68363 TBA1B_HUMAN Tubulin alpha-<br>1B chain | 2  |                       | VGINYQPPTVVPGGDLAK              | 352 | 18 | 15 | 87.73  | b5b6*b6b7b8b10b11*b11y1y2<br>y3y7y8y12y18                        | 1824.99 | 65.711  | 206983 | 2 | 913.00  | 0.134   |
| P68363 TBA1B_HUMAN Tubulin alpha-<br>1B chain | 3  |                       | QLFHPEQLITGKEDAANNYAR           | 84  | 21 | 15 | 73.71  | b2b6*b6y1y3y5y6y7*y7y9y10<br>y12y14y21*y21                       | 2415.17 | 61.978  | 173887 | 4 | 604.55  | -13.444 |
| P68363 TBA1B_HUMAN Tubulin alpha-<br>1B chain | 4  |                       | NLDIERPTYTNLNR                  | 215 | 14 | 17 | 62.25  | b2*b2b3b11y2y4*y4y5y7*y7y<br>8*y8*y8y10*y10y14*y14               | 1718.86 | 52.575  | 137426 | 3 | 573.63  | -10.440 |
| P68363 TBA1B_HUMAN Tubulin alpha-<br>1B chain | 5  | Carbamidomethyl+C(8)  | SIQFVDWCPTGFK                   | 339 | 13 | 23 | 146.29 | b2b3*b3b4b5*b5*b5b6*b6*b6<br>y1y3y4y5*y5y6y7*y7y8y9*y9y<br>10y13 | 1584.75 | 82.734  | 121637 | 2 | 792.88  | 1.849   |
| P68363 TBA1B_HUMAN Tubulin alpha-<br>1B chain | 6  |                       | IHFPLATYAPVISA EK               | 264 | 16 | 6  | 32.84  | b1b2y4y5y7y14                                                    | 1756.94 | 78.230  | 119177 | 3 | 586.32  | -11.533 |

|                                               |    |                       |                                  |     |    |    |        |                                                                                                               |         |         |         |   |         |         |
|-----------------------------------------------|----|-----------------------|----------------------------------|-----|----|----|--------|---------------------------------------------------------------------------------------------------------------|---------|---------|---------|---|---------|---------|
| [P68363]TBA1B_HUMAN Tubulin alpha-1B chain    | 7  |                       | EIIDLVLDR                        | 112 | 9  | 11 | 56.4   | b2b3°b3b4°b4y1y2y5y6y7y9                                                                                      | 1085.61 | 79.517  | 78410   | 2 | 543.31  | -4.948  |
| [P68363]TBA1B_HUMAN Tubulin alpha-1B chain    | 8  | Carbamidomethyl+C(15) | AYHEQLSVAEITNACFEPANQMV<br>K     | 280 | 24 | 9  | 39.35  | b7b10b11y1y4y7y9y11y24                                                                                        | 2750.31 | 73.355  | 59845   | 3 | 917.44  | 5.060   |
| [P68363]TBA1B_HUMAN Tubulin alpha-1B chain    | 9  |                       | LISQIVSSITASLR                   | 229 | 14 | 7  | 54.36  | b4b5b6y4y5y8y14                                                                                               | 1487.88 | 100.003 | 52439   | 2 | 744.44  | 1.887   |
| [P68363]TBA1B_HUMAN Tubulin alpha-1B chain    | 10 |                       | FDGALNVDLTEFQTNLVYPYR            | 243 | 21 | 7  | 33.99  | b2b17y2y4y5y6y21                                                                                              | 2409.22 | 94.857  | 48004   | 2 | 1205.11 | 5.675   |
| [P68363]TBA1B_HUMAN Tubulin alpha-1B chain    | 11 |                       | LSVDYGKK                         | 156 | 8  | 5  | 51.25  | y3y4y5y7y8                                                                                                    | 909.50  | 29.494  | 31401   | 2 | 455.25  | -7.717  |
| [P68363]TBA1B_HUMAN Tubulin alpha-1B chain    | 12 |                       | AFVHWYVVGEGMEEGFSEARED<br>MAALEK | 402 | 28 | 4  | 23.8   | b7b14y11y12                                                                                                   | 3217.47 | 94.241  | 2736    | 3 | 1073.16 | 13.431  |
| [P68363]TBA1B_HUMAN Tubulin alpha-1B chain    | 13 | Carbamidomethyl+C(3)  | AVCMLSNTTAAIEAWARLDHK            | 373 | 21 | 3  | 19.43  | b3b13b15                                                                                                      | 2358.15 | 82.774  | 2294    | 2 | 1179.58 | -10.353 |
| [P68363]TBA1B_HUMAN Tubulin alpha-1B chain    | 14 | Oxidation+M()         | AFVHWYVVGEGMEEGFSEAR             | 402 | 20 | 4  | 13.21  | b10°b10y4y7                                                                                                   | 2346.03 | 114.516 | 6641    | 2 | 1173.52 | 8.429   |
| [Q562R1]ACTBL_HUMAN Beta-actin-like protein 2 | 1  |                       | SYELPDGQVITIGNER                 | 239 | 16 | 39 | 218.65 | b2b3°b3b4°b4b5°b5b8°b8b9°b9b10b12°b12b13y1y2°y2y4°y4*y4y5°y5y6°y6*y6y7°y7y8y10*y10y11°y11y12°y12*y12y13y14y16 | 1790.88 | 71.814  | 1483661 | 2 | 895.94  | -5.589  |
| [Q562R1]ACTBL_HUMAN Beta-actin-like protein 2 | 2  |                       | HQGVMVGMGQK                      | 40  | 11 | 24 | 149.31 | b1b2°b2b3b4°b4b5b6b7b11y1y2*y2y3*y3y4°y4y5y6y7y9y10*y10y11                                                    | 1171.57 | 33.049  | 379414  | 2 | 586.29  | 0.729   |
| [Q562R1]ACTBL_HUMAN Beta-actin-like protein 2 | 3  |                       | DLTDYLMK                         | 184 | 8  | 10 | 46.48  | b2°b2b7b8y1y2y4y5y6y8                                                                                         | 998.48  | 70.685  | 351130  | 2 | 499.74  | -8.252  |
| [Q562R1]ACTBL_HUMAN Beta-actin-like protein 2 | 4  |                       | IIAPPERK                         | 329 | 8  | 12 | 71.39  | b2b3y2y3y4°y4y5°y5y6°y6y7y8                                                                                   | 923.56  | 26.694  | 116314  | 2 | 462.28  | -8.525  |
| [Q562R1]ACTBL_HUMAN Beta-actin-like protein 2 | 5  | Carbamidomethyl+C(1)  | CDVDIRK                          | 285 | 7  | 9  | 50.77  | b1b2°b2y2y3y4°y4y5y6                                                                                          | 905.44  | 22.651  | 75050   | 2 | 453.23  | -8.965  |
| [Q562R1]ACTBL_HUMAN Beta-actin-like protein 2 | 6  |                       | IIAPPER                          | 329 | 7  | 5  | 50.77  | y3y4y5y6y7                                                                                                    | 795.47  | 33.226  | 50492   | 2 | 398.24  | -8.517  |
| [Q562R1]ACTBL_HUMAN Beta-actin-like protein 2 | 7  |                       | AAASSPER                         | 230 | 9  | 9  | 54.74  | b1b2b9y3°y3y5y6y8y9                                                                                           | 875.42  | 34.949  | 3358    | 2 | 438.22  | 2.580   |
| [Q562R1]ACTBL_HUMAN Beta-actin-like protein 2 | 8  |                       | GYNFTTTAER                       | 197 | 10 | 5  | 26.75  | b4°b4b5°b5y7                                                                                                  | 1159.55 | 44.937  | 3145    | 2 | 580.28  | 10.633  |
| [Q562R1]ACTBL_HUMAN Beta-actin-like protein 2 | 9  |                       | VAPDEHPILLTEAPLNPK               | 96  | 18 | 14 | 82.37  | b7b9b11y3°y3y5°y5y6y8°y8y9y10°y10y15                                                                          | 1954.05 | 61.382  | 1575090 | 3 | 652.02  | -5.435  |
| [Q562R1]ACTBL_HUMAN Beta-actin-like protein 2 | 10 |                       | YPIEHGVVTNWDDMEK                 | 69  | 16 | 4  | 15.7   | b7°b7y3y8                                                                                                     | 1932.84 | 54.224  | 23235   | 2 | 966.92  | -20.525 |
| [Q562R1]ACTBL_HUMAN Beta-actin-like protein 2 | 11 |                       | YSVWIGGSILASLSTFQQMWISK          | 337 | 23 | 10 | 53.7   | b5b7b10b11y5°y5y6y7y13°y13                                                                                    | 2602.35 | 136.510 | 7546    | 3 | 868.12  | 4.222   |
| [Q562R1]ACTBL_HUMAN Beta-actin-like protein 2 | 12 | Carbamidomethyl+C(2)  | LCYVALDFEQEMVR                   | 216 | 14 | 8  | 67.69  | b12b13°b13y4y5y6y9y12                                                                                         | 1772.80 | 81.184  | 7154    | 2 | 886.90  | -20.106 |
| [Q562R1]ACTBL_HUMAN Beta-actin-like protein 2 | 13 | Carbamidomethyl+C(17) | TDNELSALVVDNNGSGMCK              | 1   | 18 | 3  | 14.27  | b13y5y14                                                                                                      | 1909.84 | 81.900  | 6158    | 2 | 955.43  | -10.227 |
| [Q562R1]ACTBL_HUMAN Beta-actin-like protein 2 | 14 |                       | IWYHTFYNELR                      | 85  | 11 | 3  | 22.46  | b4b7y5                                                                                                        | 1541.74 | 73.053  | 3086    | 3 | 514.58  | -10.372 |
| [Q562R1]ACTBL_HUMAN Beta-actin-like protein 2 | 15 |                       | QEYDEAGPPIVHRK                   | 360 | 14 | 3  | 25.45  | b10b12b13                                                                                                     | 1638.82 | 78.394  | 11773   | 3 | 546.95  | 0.224   |
| [Q562R1]ACTBL_HUMAN Beta-actin-like protein 2 | 16 |                       | KDLYANTVLSGGSTMYPGIADR           | 291 | 22 | 7  | 27.74  | b16°b16y3y4°y4y9y12                                                                                           | 2329.12 | 80.186  | 3334    | 4 | 583.04  | -12.578 |
| [Q562R1]ACTBL_HUMAN Beta-actin-like protein 2 | 17 |                       | DLYANTVLSGGSTMYPGIADRMQ<br>K     | 292 | 24 | 5  | 26.68  | b3b4b9°b9b15                                                                                                  | 2588.21 | 99.817  | 2636    | 2 | 1294.61 | -14.338 |
| [Q562R1]ACTBL_HUMAN Beta-actin-like protein 2 | 18 | Phosphoryl STY(12)    | DLYANTVLSGGSTMYPGIADR            | 292 | 21 | 14 | 71.98  | b3b4b6°b6°b6b7°b7b9b10y3°y3y9°y9y14                                                                           | 2281.04 | 77.357  | 25511   | 2 | 1141.03 | 14.128  |
| [Q562R1]ACTBL_HUMAN Beta-actin-like protein 2 | 19 | Phosphoryl STY(14)    | KDLYANTVLSGGSTMYPGIADR           | 291 | 22 | 6  | 22.45  | b14°b14y6y7°y7y15                                                                                             | 2409.14 | 79.481  | 4920    | 3 | 803.72  | 12.769  |

|                                               |    |                                          |                                    |     |    |    |        |                                                                             |         |         |        |   |         |         |
|-----------------------------------------------|----|------------------------------------------|------------------------------------|-----|----|----|--------|-----------------------------------------------------------------------------|---------|---------|--------|---|---------|---------|
| [Q562R1 ACTBL_HUMAN Beta-actin-like protein 2 | 20 | Phosphoryl STY(7)                        | GYNFTTTAEREIVRDVK                  | 197 | 17 | 3  | 14.93  | b3b6_H3PO4 b6y11                                                            | 2078.98 | 71.836  | 2694   | 3 | 693.66  | -2.701  |
| [Q562R1 ACTBL_HUMAN Beta-actin-like protein 2 | 21 | Oxidation+M(1)                           | MQKEIITLAPSTMK                     | 313 | 14 | 3  | 23.11  | b6y4y5                                                                      | 1606.87 | 58.555  | 29275  | 3 | 536.29  | 8.281   |
| [Q562R1 ACTBL_HUMAN Beta-actin-like protein 2 | 22 | Carbamidomethyl+C(13)<br>;Oxidation+M(5) | HQGVVMVGMGQKDCYVGDEAQS<br>K        | 40  | 22 | 6  | 28.12  | b5b8*b8b10b13y12                                                            | 2440.07 | 67.005  | 1655   | 2 | 1220.54 | 0.800   |
| [Q562R1 ACTBL_HUMAN Beta-actin-like protein 2 | 23 | Oxidation+M(14)                          | DLYANTVLSGGSTMYPGIADR              | 292 | 21 | 4  | 19.43  | y5y11y15*y15                                                                | 2217.04 | 88.423  | 1652   | 2 | 1109.02 | -4.515  |
| [Q562R1 ACTBL_HUMAN Beta-actin-like protein 2 | 24 |                                          | GYNFTTT                            | 197 | 7  | 0  | 2.4    |                                                                             | 803.37  | 44.998  | 5222   | 1 | 803.37  | 10.561  |
| [P63104 1433Z_HUMAN 14-3-3 protein zeta/delta | 1  |                                          | TAFDEAIAELDTLSEESYKDLTSLIM<br>QLLR | 193 | 29 | 27 | 173.15 | b2b3b4*b4b5b6*b6b7*b7b8*b8<br>b17y1y2y3y4y5y6y8y10y11y1<br>6y17y19y21y22y29 | 3302.64 | 136.666 | 112700 | 3 | 1101.55 | 1.035   |
| [P63104 1433Z_HUMAN 14-3-3 protein zeta/delta | 2  |                                          | FLIPNASQAESK                       | 103 | 12 | 15 | 79.07  | b2b3y2y4*y4y5*y5y6y7y9*y9*<br>y9y10*y10y12                                  | 1304.68 | 55.328  | 107635 | 2 | 652.85  | -0.281  |
| [P63104 1433Z_HUMAN 14-3-3 protein zeta/delta | 3  |                                          | NLLSVAYK                           | 41  | 8  | 9  | 46.48  | b1b2b4*b4y1y2y3y5y6                                                         | 907.52  | 58.041  | 98856  | 2 | 454.26  | -5.986  |
| [P63104 1433Z_HUMAN 14-3-3 protein zeta/delta | 4  |                                          | SVTEQGAELSNEER                     | 27  | 14 | 18 | 125.86 | b2b5b10b12y2*y2y4*y4y5y6y<br>7y9*y9y10*y10y11y12y14                         | 1548.72 | 34.807  | 91635  | 2 | 774.86  | 3.705   |
| [P63104 1433Z_HUMAN 14-3-3 protein zeta/delta | 5  |                                          | GIVDQSQQAYQEAFEISKK                | 139 | 19 | 7  | 28.86  | b2b3b12y3y4y16y19                                                           | 2169.07 | 68.383  | 63540  | 3 | 723.70  | -4.390  |
| [P63104 1433Z_HUMAN 14-3-3 protein zeta/delta | 6  | Carbamidomethyl+C(3)                     | DICNDVLSLLEK                       | 91  | 12 | 6  | 46.38  | b3y2y3y4y6y10                                                               | 1418.72 | 98.829  | 55794  | 2 | 709.87  | 2.495   |
| [P63104 1433Z_HUMAN 14-3-3 protein zeta/delta | 7  |                                          | YLAEVAAGDDKK                       | 127 | 12 | 7  | 75.07  | y3y5y6y7y9y10y12                                                            | 1279.65 | 32.916  | 45358  | 3 | 427.22  | -5.437  |
| [P63104 1433Z_HUMAN 14-3-3 protein zeta/delta | 8  |                                          | DSTLIMQLLR                         | 212 | 10 | 5  | 31.98  | y2y4y5y7y10                                                                 | 1189.67 | 92.652  | 22909  | 2 | 595.34  | 3.899   |
| [P63104 1433Z_HUMAN 14-3-3 protein zeta/delta | 9  |                                          | YLAEVAAGDDK                        | 127 | 11 | 5  | 38.89  | b5b11y3y6y10                                                                | 1151.56 | 48.341  | 2215   | 2 | 576.29  | 6.042   |
| [P63104 1433Z_HUMAN 14-3-3 protein zeta/delta | 10 |                                          | GIVDQSQQAYQEAFEISK                 | 139 | 18 | 6  | 28.14  | b9b12b16y9y15*y15                                                           | 2041.00 | 60.048  | 40709  | 4 | 511.01  | 6.639   |
| [P63104 1433Z_HUMAN 14-3-3 protein zeta/delta | 11 |                                          | IETELR                             | 85  | 6  | 2  | 12.93  | y5*y5                                                                       | 760.41  | 30.986  | 19581  | 2 | 380.71  | -6.742  |
| [P63104 1433Z_HUMAN 14-3-3 protein zeta/delta | 12 |                                          | TAFDEAIAELDTLSEESYK                | 193 | 19 | 3  | 21.48  | b12b13y11                                                                   | 2131.99 | 85.451  | 1768   | 2 | 1066.50 | -2.977  |
| [P63104 1433Z_HUMAN 14-3-3 protein zeta/delta | 13 |                                          | FLIPNASQAESKVFYK                   | 103 | 17 | 3  | 14.93  | b6y9y13                                                                     | 1955.05 | 61.005  | 291473 | 3 | 652.36  | -5.744  |
| [P63104 1433Z_HUMAN 14-3-3 protein zeta/delta | 14 |                                          | SVTEQGAELSNEERNLLSVAYK             | 27  | 22 | 4  | 12.43  | b9*b9y5y11                                                                  | 2437.24 | 105.717 | 61281  | 3 | 813.08  | 6.010   |
| [P63104 1433Z_HUMAN 14-3-3 protein zeta/delta | 15 |                                          | KEMQPTHPIR                         | 157 | 10 | 5  | 52.21  | b3b6b7b9*b9                                                                 | 1236.64 | 56.275  | 27062  | 3 | 412.88  | -11.549 |
| [P63104 1433Z_HUMAN 14-3-3 protein zeta/delta | 16 |                                          | YLAEVAAGDDKK                       | 127 | 12 | 5  | 44.84  | b7b8b10y7y8                                                                 | 1279.66 | 42.574  | 15962  | 2 | 640.33  | 4.007   |
| [P63104 1433Z_HUMAN 14-3-3 protein zeta/delta | 17 | Carbamidomethyl+C(7)                     | YDDMAACMKSVTEQGAELSNEE<br>R        | 18  | 23 | 5  | 22.2   | y3y7*y7y8*y8                                                                | 2634.13 | 44.124  | 7219   | 4 | 659.29  | 6.951   |
| [P63104 1433Z_HUMAN 14-3-3 protein zeta/delta | 18 |                                          | QQMAREYR                           | 75  | 8  | 5  | 38.8   | y4y6*y6y7*y7                                                                | 1081.51 | 34.972  | 1982   | 2 | 541.26  | -14.334 |
| [P63104 1433Z_HUMAN 14-3-3 protein zeta/delta | 19 | Carbamidomethyl+C(9)                     | IETELRDICNDVLSLLEK                 | 85  | 18 | 5  | 23.19  | b7*b7b8*b8b12                                                               | 2160.11 | 136.457 | 1838   | 2 | 1080.56 | -5.425  |
| [P60660 MYL6_HUMAN Myosin light polypeptide 6 | 1  |                                          | VLDFEHFLPMLQTVAK                   | 63  | 16 | 14 | 112.9  | b2b3b5b6y2y3y4y5y6y8y9y14<br>y15y16                                         | 1887.98 | 102.061 | 275805 | 3 | 630.00  | -11.897 |
| [P60660 MYL6_HUMAN Myosin light polypeptide 6 | 2  |                                          | ALGQNPTNAEVLK                      | 37  | 13 | 16 | 127.82 | b2b3b4b5*b5b10y2y3y4y5y7y<br>8y9y11*y11y13                                  | 1354.74 | 45.007  | 159525 | 2 | 677.87  | 2.433   |
| [P60660 MYL6_HUMAN Myosin light polypeptide 6 | 3  |                                          | EAFQLFDR                           | 13  | 8  | 10 | 51.25  | b2*b2y1y2y3y4y5*y5y6y8                                                      | 1025.50 | 68.767  | 86817  | 2 | 513.25  | -5.119  |

|                                              |    |                       |                       |      |    |    |        |                                                                                     |         |         |        |   |         |         |
|----------------------------------------------|----|-----------------------|-----------------------|------|----|----|--------|-------------------------------------------------------------------------------------|---------|---------|--------|---|---------|---------|
| P60660 MYL6_HUMAN Myosin light polypeptide 6 | 4  |                       | VFDKEGNGTVMGAEIR      | 94   | 16 | 17 | 93.37  | b2b5b6°b6b7b8b11y1y2y3y5y6°y6y11y12°y12y16                                          | 1722.84 | 49.720  | 60327  | 3 | 574.95  | -5.314  |
| P60660 MYL6_HUMAN Myosin light polypeptide 6 | 5  | Carbamidomethyl+C(6)  | ILYSQCQGDVMR          | 26   | 11 | 7  | 47.92  | y2y3y6y8y9°y9y11                                                                    | 1341.63 | 48.637  | 53120  | 2 | 671.32  | 2.639   |
| P60660 MYL6_HUMAN Myosin light polypeptide 6 | 6  |                       | NKDQGTIEDYVEGLR       | 79   | 15 | 12 | 116.52 | b6b9b10y3y4y5y6y7y8y9y11y15                                                         | 1786.82 | 56.214  | 41187  | 3 | 596.28  | -3.074  |
| P60660 MYL6_HUMAN Myosin light polypeptide 6 | 7  |                       | EGNGTVMGAEIR          | 98   | 12 | 3  | 30.72  | y5y7y11                                                                             | 1233.60 | 43.484  | 25489  | 2 | 617.30  | 5.047   |
| P60660 MYL6_HUMAN Myosin light polypeptide 6 | 8  |                       | HILSG                 | 146  | 5  | 1  | 12.45  | y4                                                                                  | 526.30  | 31.633  | 5130   | 1 | 526.30  | 4.175   |
| P60660 MYL6_HUMAN Myosin light polypeptide 6 | 9  |                       | DQGTIEDYVEGLR         | 81   | 13 | 3  | 23.72  | b11y7y8                                                                             | 1544.66 | 45.757  | 2242   | 3 | 515.56  | -14.146 |
| P60660 MYL6_HUMAN Myosin light polypeptide 6 | 10 | Carbamidomethyl+C(11) | TGDGKILYSQCQGDVMR     | 21   | 16 | 5  | 37.61  | y3y4°y4y5y12                                                                        | 1799.82 | 63.453  | 6999   | 2 | 900.42  | -9.563  |
| P60660 MYL6_HUMAN Myosin light polypeptide 6 | 11 | Carbamidomethyl+C(2)  | MCDFTEDQTAEFKEAFQLFDR | 0    | 21 | 3  | 12.79  | b9y3y9                                                                              | 2628.14 | 44.149  | 2038   | 3 | 876.72  | 2.322   |
| P60660 MYL6_HUMAN Myosin light polypeptide 6 | 12 |                       | VLGNPKSDEMNVK         | 50   | 13 | 10 | 67     | b3b12°b12y7°y7y8°y8y9y10y12                                                         | 1430.72 | 97.954  | 1976   | 2 | 715.86  | -7.764  |
| P60660 MYL6_HUMAN Myosin light polypeptide 6 | 13 | Oxidation+M(11)       | VFDKEGNGTVMGAEIR      | 94   | 16 | 8  | 32.84  | b4°b4b9°b9b13°b13*b13b14                                                            | 1738.84 | 49.788  | 9060   | 3 | 580.28  | -2.738  |
| P60660 MYL6_HUMAN Myosin light polypeptide 6 | 14 |                       | PMLQTVAK              | 71   | 8  | 1  | 7.32   | b3                                                                                  | 887.50  | 102.055 | 2724   | 2 | 444.26  | 2.132   |
| P60660 MYL6_HUMAN Myosin light polypeptide 6 | 15 |                       | EAFQLFDR              | 13   | 8  | 0  | 1.44   |                                                                                     | 1007.50 | 68.755  | 9847   | 2 | 504.25  | 11.511  |
| P35579 MYH9_HUMAN Myosin-9                   | 1  |                       | LQQELDLLVDLDHQR       | 1417 | 16 | 22 | 154.36 | b2*b2b3b4b9b11y1y3*y3y4y5y6y7y8y10y12y13°y13y14°y14*y14y16                          | 1949.97 | 85.805  | 367530 | 3 | 650.66  | -9.641  |
| P35579 MYH9_HUMAN Myosin-9                   | 2  |                       | IMGIPEEQMGLLR         | 327  | 14 | 10 | 57.48  | b2b3b4b12y2y4y9y10y12y14                                                            | 1615.82 | 78.096  | 254022 | 2 | 808.41  | -1.133  |
| P35579 MYH9_HUMAN Myosin-9                   | 3  |                       | QLLQANPILEAFGNAK      | 209  | 16 | 31 | 183.05 | b2*b2b3*b3b4*b4b5*b5b6*b6b16y1y2y4*y4y5y6y7°y7*y7y8y9y10y11y12*y12y13°y13*y13y14y16 | 1726.94 | 91.394  | 242617 | 2 | 863.97  | -4.383  |
| P35579 MYH9_HUMAN Myosin-9                   | 4  |                       | IIGLDQVAGMSETALPGAFK  | 617  | 20 | 15 | 107.42 | b2b3b4b14b15y2y3y4y5y6y7y15*y15y16y20                                               | 2018.07 | 90.134  | 228026 | 2 | 1009.54 | 1.573   |
| P35579 MYH9_HUMAN Myosin-9                   | 5  |                       | IAEFTTNLTETEEEEK      | 1000 | 14 | 18 | 160.88 | b2b3b4b9b11b14y3y4y5y6y7y8y9y11y12°y12y13y14                                        | 1653.79 | 57.263  | 211819 | 2 | 827.40  | 1.107   |
| P35579 MYH9_HUMAN Myosin-9                   | 6  |                       | IAQLEEQLDNETK         | 1815 | 13 | 11 | 71.77  | b3b4y5*y5y6y9y10*y10y11y13*y13                                                      | 1530.77 | 51.569  | 195716 | 2 | 765.89  | 3.270   |
| P35579 MYH9_HUMAN Myosin-9                   | 7  |                       | TQLEEELEDELQATEDAK    | 1538 | 17 | 9  | 49.38  | b4*b4b12b13y6y8y9y14y17                                                             | 1961.93 | 79.033  | 161985 | 2 | 981.47  | 3.795   |
| P35579 MYH9_HUMAN Myosin-9                   | 8  |                       | IAQLEEELEEEQGNTELINDR | 1730 | 21 | 10 | 64.92  | b3b11y3*y3y4y6y7y10y11y21                                                           | 2472.17 | 70.827  | 155158 | 3 | 824.73  | 0.198   |
| P35579 MYH9_HUMAN Myosin-9                   | 9  |                       | LQVELDNVTGLLSQSDSK    | 1277 | 18 | 19 | 108.22 | b2*b2b3b4°b4y2y4°y4y5°y5y6°y6y7y13y14y15°y15y16y18                                  | 1946.01 | 81.175  | 150241 | 2 | 973.51  | 3.576   |
| P35579 MYH9_HUMAN Myosin-9                   | 10 | Carbamidomethyl+C(13) | LEEEQIILEDQNCK        | 975  | 14 | 13 | 99.31  | b3°b3b5b6b7b9y1y3y5y7y8y9y14                                                        | 1760.84 | 55.052  | 139883 | 2 | 880.93  | 3.536   |
| P35579 MYH9_HUMAN Myosin-9                   | 11 |                       | DELADEIANSNGK         | 1703 | 13 | 7  | 42.88  | b2b3b4y2y5y9y10                                                                     | 1348.63 | 49.599  | 131173 | 2 | 674.82  | 2.987   |
| P35579 MYH9_HUMAN Myosin-9                   | 12 |                       | ELESQISELQEDLESER     | 1107 | 17 | 21 | 118.18 | b2b3°b3b5°b5b6°b6b14b17y3y4y6y8°y8y11y12°y12*y12y13y15y17                           | 2033.96 | 79.589  | 125429 | 2 | 1017.49 | 5.942   |
| P35579 MYH9_HUMAN Myosin-9                   | 13 |                       | LDPHLVLDQLR           | 682  | 11 | 9  | 82.27  | b5y3y4*y4y5y6y7y9y11                                                                | 1318.74 | 71.280  | 118926 | 2 | 659.87  | -4.999  |

|                            |    |                      |                            |      |    |    |        |                                                                              |         |         |        |   |         |         |
|----------------------------|----|----------------------|----------------------------|------|----|----|--------|------------------------------------------------------------------------------|---------|---------|--------|---|---------|---------|
| P35579 MYH9_HUMAN Myosin-9 | 14 |                      | ANLQIDQINTDLNLER           | 1754 | 16 | 24 | 150.36 | b2*b2b3*b3b4*b4b5b6y3y4*y4y5y6*y6*y6y8y9y10y11*y11y12*y12*y12y16             | 1869.97 | 72.401  | 110723 | 2 | 935.49  | 2.546   |
| P35579 MYH9_HUMAN Myosin-9 | 15 |                      | ALEQQVEEMK                 | 1528 | 10 | 13 | 70.13  | b2b3y3y4*y4y6*y6*y6y7*y7y8*y8y10                                             | 1204.59 | 45.791  | 109290 | 2 | 602.80  | 4.459   |
| P35579 MYH9_HUMAN Myosin-9 | 16 |                      | LEVNLQAMK                  | 1557 | 9  | 11 | 83.07  | b2b3y1y3y4y5y6*y6y7*y7y8                                                     | 1045.56 | 58.043  | 96966  | 2 | 523.28  | -10.157 |
| P35579 MYH9_HUMAN Myosin-9 | 17 |                      | MQQNIQELEEQLIEEEESAR       | 940  | 19 | 28 | 175.66 | b2*b2b4b5*b5b7b8b9*b9b10°b10*b10b12*b12b13y2y3y4*y4y5y7y8y10*y10y13y14y16y19 | 2333.08 | 75.266  | 96284  | 2 | 1167.04 | 8.372   |
| P35579 MYH9_HUMAN Myosin-9 | 18 |                      | KEEELQAALAR                | 1080 | 11 | 13 | 121.39 | b4b8b10y2y3y4y5y7y8y9y10y11*y11                                              | 1257.68 | 42.574  | 93221  | 2 | 629.34  | -1.359  |
| P35579 MYH9_HUMAN Myosin-9 | 19 |                      | VEAQLQELQVK                | 1249 | 11 | 15 | 107.18 | b1b2b3b4b5b9y2y3*y3y5*y5y7y8y9y11                                            | 1284.71 | 53.276  | 90815  | 2 | 642.86  | -2.185  |
| P35579 MYH9_HUMAN Myosin-9 | 20 |                      | EEILAQAK                   | 1661 | 8  | 14 | 73.15  | b1b2°b2b3°b3b4°b4y1y2y3*y3y4y5y6                                             | 901.49  | 35.009  | 87846  | 2 | 451.25  | -5.755  |
| P35579 MYH9_HUMAN Myosin-9 | 21 |                      | YEILTPNSIPK                | 720  | 11 | 5  | 22.46  | b2b3y6y9y11                                                                  | 1274.70 | 62.555  | 86940  | 2 | 637.85  | -1.437  |
| P35579 MYH9_HUMAN Myosin-9 | 22 |                      | QLEEAEEEAQR                | 1877 | 11 | 16 | 117.41 | b4b7b11y3y4y5*y5y6y7y8°y8y9°y9*y9y10y11                                      | 1331.61 | 29.655  | 86015  | 2 | 666.31  | -0.458  |
| P35579 MYH9_HUMAN Myosin-9 | 23 |                      | TEMEDLMSSKDDVVGK           | 1503 | 15 | 14 | 109    | b2b10b13y3y5y8y9°y9y10y11y12y13°y13y15                                       | 1684.73 | 51.270  | 84807  | 3 | 562.25  | -8.622  |
| P35579 MYH9_HUMAN Myosin-9 | 24 |                      | ALELDSNLYR                 | 745  | 10 | 7  | 24.99  | b2b3y2y5y8°y8y10                                                             | 1193.61 | 59.957  | 84730  | 2 | 597.31  | -2.045  |
| P35579 MYH9_HUMAN Myosin-9 | 25 |                      | ELEDATETADAMNR             | 1898 | 14 | 11 | 68.15  | b11b14y2y5y6y7y9y11°y11y12y14                                                | 1565.68 | 43.207  | 84662  | 2 | 783.34  | 3.041   |
| P35579 MYH9_HUMAN Myosin-9 | 26 | Carbamidomethyl+C(9) | VEDMAELTCLNEASVLHNLK       | 82   | 20 | 9  | 34.14  | b2b3b5y2y4y5y13y18y20                                                        | 2286.10 | 79.887  | 84489  | 3 | 762.70  | -5.767  |
| P35579 MYH9_HUMAN Myosin-9 | 27 |                      | LQEMEGTVK                  | 1793 | 9  | 12 | 71.87  | b2b5°b5b8y2y4°y4y5°y5y6y7°y7                                                 | 1034.52 | 32.610  | 81272  | 2 | 517.77  | 3.894   |
| P35579 MYH9_HUMAN Myosin-9 | 28 |                      | ASITALEAK                  | 1806 | 9  | 5  | 36.27  | y2y5y6y8y9                                                                   | 903.51  | 42.284  | 81185  | 2 | 452.26  | -6.080  |
| P35579 MYH9_HUMAN Myosin-9 | 29 | Carbamidomethyl+C(4) | ADFCIIHYAGK                | 565  | 11 | 7  | 62.14  | y1y3y4y5y7y8y11                                                              | 1294.62 | 58.830  | 78073  | 2 | 647.81  | -3.300  |
| P35579 MYH9_HUMAN Myosin-9 | 30 |                      | AGVLAHLEEER                | 764  | 11 | 17 | 92.51  | b1b2b3b6y1y2°y2y3°y3y4y5°y5y6y7°y7y8y11                                      | 1223.63 | 49.784  | 75274  | 2 | 612.32  | -3.492  |
| P35579 MYH9_HUMAN Myosin-9 | 31 |                      | VVFQEFR                    | 711  | 7  | 12 | 75.68  | b4b5y1y2y3y4°y4°y4y5°y5y6y7                                                  | 924.49  | 55.742  | 75216  | 2 | 462.75  | -5.150  |
| P35579 MYH9_HUMAN Myosin-9 | 32 |                      | NFINNPLAQADWAAK            | 14   | 15 | 7  | 23.49  | b2b3b5y2y10y12y15                                                            | 1672.85 | 78.411  | 71974  | 2 | 836.93  | 0.730   |
| P35579 MYH9_HUMAN Myosin-9 | 33 |                      | DLEGLSQR                   | 1392 | 8  | 6  | 34.03  | b5y1y3y6y8*y8                                                                | 917.46  | 39.462  | 65924  | 2 | 459.24  | -4.125  |
| P35579 MYH9_HUMAN Myosin-9 | 34 |                      | VIQYLAYVASSHK              | 186  | 13 | 14 | 82.46  | b1b2b4b7y2y5°y5y6y8y9y10y11°y11y13                                           | 1478.78 | 60.988  | 61619  | 3 | 493.60  | -10.566 |
| P35579 MYH9_HUMAN Myosin-9 | 35 |                      | QIATLHAQVADMK              | 1357 | 13 | 7  | 33.42  | y1y2y6y7y8y13*y13                                                            | 1425.74 | 46.726  | 60873  | 3 | 475.92  | -7.449  |
| P35579 MYH9_HUMAN Myosin-9 | 36 |                      | FLSNGHVTPGGQDDKDMFQETMEAMR | 301  | 26 | 6  | 21.33  | b6y2y3y4y6y26                                                                | 3010.37 | 77.053  | 58701  | 4 | 753.35  | -4.379  |
| P35579 MYH9_HUMAN Myosin-9 | 37 | Carbamidomethyl+C(1) | CNGVLEGIR                  | 693  | 9  | 10 | 58.17  | b1b2*b2b8*b8y1y3y4y5y7                                                       | 1017.51 | 48.819  | 51840  | 2 | 509.26  | -3.179  |
| P35579 MYH9_HUMAN Myosin-9 | 38 |                      | SMEAEMIQLQEELAAER          | 1676 | 18 | 10 | 45.81  | b2b15y1y2°y2y3y5y6y10y11                                                     | 2048.95 | 94.127  | 45653  | 3 | 683.65  | -7.149  |
| P35579 MYH9_HUMAN Myosin-9 | 39 |                      | SGFEPASLK                  | 38   | 9  | 5  | 28.49  | b3b9y2y5y6                                                                   | 935.48  | 46.303  | 45137  | 2 | 468.24  | -4.567  |
| P35579 MYH9_HUMAN Myosin-9 | 40 |                      | TELEDTLDSTAAQQLR           | 1145 | 17 | 7  | 34.57  | y2y4y6*y6y9y12y17                                                            | 1919.93 | 61.522  | 45098  | 2 | 960.47  | 4.133   |
| P35579 MYH9_HUMAN Myosin-9 | 41 |                      | LVWVPSDK                   | 30   | 8  | 7  | 46.48  | b7°b7y1y4y6y7y8                                                              | 943.52  | 55.551  | 43663  | 2 | 472.26  | -4.658  |
| P35579 MYH9_HUMAN Myosin-9 | 42 | Carbamidomethyl+C(7) | MEDSVGCLETAEEVK            | 1372 | 15 | 8  | 36.86  | b4y8y10y11°y11y13°y13y15                                                     | 1696.75 | 53.758  | 42502  | 2 | 848.88  | 7.051   |
| P35579 MYH9_HUMAN Myosin-9 | 43 | Carbamidomethyl+C(7) | MEDSVGCLETAEEVKR           | 1372 | 16 | 5  | 24.07  | y2y5y7y8y16                                                                  | 1852.83 | 48.622  | 35933  | 3 | 618.28  | -4.414  |
| P35579 MYH9_HUMAN Myosin-9 | 44 |                      | LEGDSTDLSDQIAELQAQIAELK    | 1052 | 23 | 6  | 18.42  | b7y1y3y5y8y23                                                                | 2487.27 | 101.627 | 32467  | 2 | 1244.14 | 8.638   |
| P35579 MYH9_HUMAN Myosin-9 | 45 |                      | THEAQIQEMR                 | 1181 | 10 | 16 | 106.7  | b2b3°b3b4b8y2y3y4*y4y5y6*y6y7y8*y8y10                                        | 1242.59 | 29.030  | 31638  | 2 | 621.80  | -0.688  |



|                            |    |                       |                                    |      |    |    |        |                                                                   |         |         |        |   |         |         |
|----------------------------|----|-----------------------|------------------------------------|------|----|----|--------|-------------------------------------------------------------------|---------|---------|--------|---|---------|---------|
| P35579 MYH9_HUMAN Myosin-9 | 46 |                       | EEELQAALAR                         | 1081 | 10 | 3  | 31.98  | y3y6y7                                                            | 1129.58 | 49.492  | 29166  | 2 | 565.30  | -1.513  |
| P35579 MYH9_HUMAN Myosin-9 | 47 |                       | EQLLEEEEA                          | 1342 | 10 | 5  | 37.44  | b4y5y7y8y10                                                       | 1233.56 | 26.578  | 20704  | 2 | 617.28  | 6.135   |
| P35579 MYH9_HUMAN Myosin-9 | 48 | Carbamidomethyl+C(13) | SMMQDREDQSLCTGESGAGK               | 159  | 21 | 8  | 42.17  | b11y6y7y9*y9y10*y10y15                                            | 2299.99 | 49.845  | 17351  | 3 | 767.34  | -0.743  |
| P35579 MYH9_HUMAN Myosin-9 | 49 |                       | LTKDFSALSQLQDTQELLQEEENR           | 1298 | 24 | 4  | 17.82  | b5b7b11y5                                                         | 2835.36 | 97.052  | 16746  | 3 | 945.79  | -13.260 |
| P35579 MYH9_HUMAN Myosin-9 | 50 |                       | LQRELEDATETADAMNREVSSLK            | 1895 | 23 | 5  | 15.79  | b7b12y15y21y23                                                    | 2606.30 | 78.085  | 12245  | 3 | 869.44  | 8.712   |
| P35579 MYH9_HUMAN Myosin-9 | 51 |                       | EEVGEEAIVELVENGKK                  | 47   | 17 | 9  | 47.44  | b4*b4b8b9b10b14*b14y14*y14                                        | 1871.96 | 99.902  | 7788   | 2 | 936.48  | -0.130  |
| P35579 MYH9_HUMAN Myosin-9 | 52 |                       | SGFEPASLKKEEVGEEAIVELVENGK         | 38   | 25 | 3  | 21.17  | b6y3y4                                                            | 2660.31 | 89.061  | 7172   | 3 | 887.44  | -7.433  |
| P35579 MYH9_HUMAN Myosin-9 | 53 |                       | FVSELWKDVD                         | 606  | 11 | 4  | 25.47  | b6b7y8y11                                                         | 1393.73 | 64.779  | 5679   | 3 | 465.25  | 13.226  |
| P35579 MYH9_HUMAN Myosin-9 | 54 |                       | LQQLFNHTMFILEQEEYQR                | 475  | 19 | 8  | 45.12  | b2b3*b3b8y8y9y11y12                                               | 2467.24 | 103.567 | 3902   | 3 | 823.08  | 12.963  |
| P35579 MYH9_HUMAN Myosin-9 | 55 |                       | GELANAEVK                          | 1226 | 8  | 6  | 48.24  | b6b7*b7b8y3y5                                                     | 859.44  | 41.821  | 2584   | 2 | 430.22  | -11.008 |
| P35579 MYH9_HUMAN Myosin-9 | 56 |                       | YAEERDR                            | 1459 | 7  | 4  | 35.31  | b6y3y4y7                                                          | 938.43  | 35.734  | 2241   | 2 | 469.72  | -5.789  |
| P35579 MYH9_HUMAN Myosin-9 | 57 |                       | VNKDDIQK                           | 66   | 8  | 4  | 38.8   | b2y3y4y7                                                          | 959.51  | 20.787  | 2163   | 2 | 480.26  | -2.036  |
| P35579 MYH9_HUMAN Myosin-9 | 58 |                       | IAQLEEQDNETKER                     | 1815 | 15 | 4  | 38.38  | y7y9y10y11                                                        | 1815.90 | 84.503  | 1802   | 2 | 908.45  | -3.294  |
| P35579 MYH9_HUMAN Myosin-9 | 59 |                       | LTEMETLQSQLMAEK                    | 867  | 15 | 4  | 27.13  | b6b9b10y11                                                        | 1751.86 | 79.496  | 1613   | 3 | 584.62  | 1.603   |
| P35579 MYH9_HUMAN Myosin-9 | 60 |                       | EEVGEEAIVELVENGK                   | 47   | 16 | 4  | 23.4   | b4*b4b12b15                                                       | 1743.88 | 113.785 | 1561   | 2 | 872.44  | 7.700   |
| P35579 MYH9_HUMAN Myosin-9 | 61 |                       | DFSALSQLQDTQELLQEEENR              | 1301 | 21 | 6  | 28.16  | y3*y3*y3y12y13y15                                                 | 2493.17 | 91.780  | 162756 | 3 | 831.73  | -2.350  |
| P35579 MYH9_HUMAN Myosin-9 | 62 |                       | VSHLLGINVTDFTFR                    | 373  | 14 | 7  | 52.81  | b3*b3b6y5y6y9y10                                                  | 1571.83 | 75.130  | 101521 | 3 | 524.61  | -16.153 |
| P35579 MYH9_HUMAN Myosin-9 | 63 |                       | TFHIFYLLSGAGEHLK                   | 272  | 17 | 3  | 33.12  | b8b9b10                                                           | 1996.01 | 61.118  | 71193  | 3 | 666.01  | -11.253 |
| P35579 MYH9_HUMAN Myosin-9 | 64 |                       | NLPIYSEEIVEMYK                     | 125  | 14 | 7  | 57.48  | b3b4b8y4y5y10y12                                                  | 1727.86 | 82.130  | 33394  | 2 | 864.43  | 2.826   |
| P35579 MYH9_HUMAN Myosin-9 | 65 |                       | LMATLR                             | 656  | 6  | 2  | 25.39  | y4y5                                                              | 704.41  | 40.195  | 26513  | 2 | 352.71  | -8.838  |
| P35579 MYH9_HUMAN Myosin-9 | 66 |                       | TEMEDLMSSK                         | 1503 | 10 | 4  | 39.76  | y3y5*y5y8                                                         | 1170.51 | 51.680  | 23702  | 2 | 585.76  | 5.527   |
| P35579 MYH9_HUMAN Myosin-9 | 67 |                       | DEAIK                              | 1633 | 5  | 1  | 12.45  | b3                                                                | 575.31  | 79.467  | 9880   | 1 | 575.31  | 9.336   |
| P35579 MYH9_HUMAN Myosin-9 | 68 |                       | HSQAVEELAEQLEQTK                   | 1193 | 16 | 4  | 15.7   | b7*b7b14y7                                                        | 1839.90 | 66.457  | 8618   | 3 | 613.97  | -6.237  |
| P35579 MYH9_HUMAN Myosin-9 | 69 |                       | ALSLAR                             | 1477 | 6  | 5  | 37.84  | b3*b3y4*y4y5                                                      | 630.39  | 34.897  | 8417   | 1 | 630.39  | 1.840   |
| P35579 MYH9_HUMAN Myosin-9 | 70 |                       | DYVQK                              | 398  | 5  | 1  | 12.45  | y3                                                                | 652.33  | 33.039  | 7405   | 1 | 652.33  | -2.152  |
| P35579 MYH9_HUMAN Myosin-9 | 71 |                       | DLEAHIDSANK                        | 1620 | 11 | 4  | 35.7   | b5b10y7y8                                                         | 1212.56 | 30.521  | 6595   | 2 | 606.79  | -16.913 |
| P35579 MYH9_HUMAN Myosin-9 | 72 | Carbamidomethyl+C(7)  | QELEEICHDLER                       | 910  | 13 | 5  | 31.98  | b10*b10b11y6y10                                                   | 1641.73 | 60.048  | 6216   | 3 | 547.92  | -13.979 |
| P35579 MYH9_HUMAN Myosin-9 | 73 |                       | QQLER                              | 1780 | 5  | 1  | 12.45  | y4                                                                | 673.37  | 33.461  | 3781   | 1 | 673.37  | 5.348   |
| P35579 MYH9_HUMAN Myosin-9 | 74 | Carbamidomethyl+C(14) | LQLQEQLQAETELCAEAELR               | 882  | 21 | 4  | 22.44  | y4*y4y5y13                                                        | 2501.18 | 74.608  | 3485   | 3 | 834.40  | -13.568 |
| P35579 MYH9_HUMAN Myosin-9 | 75 |                       | NAEQYK                             | 1856 | 6  | 1  | 12.93  | y3                                                                | 752.37  | 43.603  | 2891   | 1 | 752.37  | 13.710  |
| P35579 MYH9_HUMAN Myosin-9 | 76 |                       | QVEDEK                             | 1332 | 6  | 6  | 62.75  | b3b4b5y3y4*y4                                                     | 747.35  | 73.084  | 2884   | 1 | 747.35  | 1.715   |
| P35579 MYH9_HUMAN Myosin-9 | 77 |                       | FQKPK                              | 555  | 5  | 1  | 12.45  | b3                                                                | 647.39  | 27.854  | 2687   | 1 | 647.39  | 11.125  |
| P35579 MYH9_HUMAN Myosin-9 | 78 |                       | QAQQR                              | 1697 | 6  | 1  | 12.93  | y5                                                                | 759.38  | 34.057  | 2612   | 1 | 759.38  | 8.439   |
| P35579 MYH9_HUMAN Myosin-9 | 79 |                       | VLQR                               | 810  | 4  | 1  | 11.97  | b3                                                                | 515.33  | 97.361  | 2446   | 1 | 515.33  | -5.804  |
| P35579 MYH9_HUMAN Myosin-9 | 80 |                       | HEMPPHIYAITDTAYR                   | 143  | 16 | 5  | 22.03  | b8*b8b11y6y8                                                      | 1914.87 | 58.614  | 2169   | 2 | 957.94  | -22.120 |
| P35579 MYH9_HUMAN Myosin-9 | 81 |                       | DMFQETMEAMR                        | 316  | 11 | 5  | 34.12  | b7y3y4*y4y6                                                       | 1388.59 | 44.822  | 2046   | 3 | 463.54  | 18.989  |
| P35579 MYH9_HUMAN Myosin-9 | 82 |                       | TLEEEAK                            | 1174 | 7  | 4  | 38.32  | b3b5y6*y6                                                         | 819.40  | 43.314  | 1963   | 1 | 819.40  | -14.153 |
| P35579 MYH9_HUMAN Myosin-9 | 83 |                       | HNLEK                              | 1352 | 5  | 1  | 12.45  | b3                                                                | 640.34  | 26.674  | 1691   | 1 | 640.34  | 0.000   |
| P35579 MYH9_HUMAN Myosin-9 | 84 |                       | EEELVK                             | 850  | 6  | 5  | 50.29  | b4y3y4*y4y5                                                       | 746.39  | 35.654  | 1638   | 2 | 373.70  | -8.832  |
| P35579 MYH9_HUMAN Myosin-9 | 85 |                       | QGFPNRVVFQEFR                      | 705  | 13 | 3  | 23.72  | b10y3y4                                                           | 1623.82 | 78.564  | 314467 | 3 | 541.94  | -14.584 |
| P35579 MYH9_HUMAN Myosin-9 | 86 |                       | DLGEELEALKTELEDTLTDSTAAQQELR       | 1135 | 27 | 24 | 216.48 | b3b4b6b8b9b10b11*b11b12*b12b13b14b16b21b24b26y5*y5y7y8y9y10y11y12 | 3017.48 | 118.287 | 174022 | 3 | 1006.50 | 1.699   |
| P35579 MYH9_HUMAN Myosin-9 | 87 | Carbamidomethyl+C(8)  | KQELEEICHDLER                      | 909  | 14 | 7  | 65.26  | b6b7b8y3y5y6y11                                                   | 1769.84 | 56.367  | 139978 | 3 | 590.62  | -5.587  |
| P35579 MYH9_HUMAN Myosin-9 | 88 | Carbamidomethyl+C(27) | RQGASFIGILDIAGFEIFDLNSFEQLCINYTNEK | 441  | 34 | 10 | 47.54  | b3*b3b33y7*y7*y7y8y10y11y12                                       | 3922.88 | 96.005  | 113098 | 4 | 981.48  | -13.069 |
| P35579 MYH9_HUMAN Myosin-9 | 89 |                       | KLEGDSTDLSQIAELQAQIAELK            | 1051 | 24 | 21 | 168.41 | b5b7*b7b8*b8b9b10*b10b11b12*b12b15b21y3y4y5y6y7y8y9y11            | 2615.33 | 97.138  | 102427 | 3 | 872.45  | -2.427  |
| P35579 MYH9_HUMAN Myosin-9 | 90 |                       | VMQEQGTHPKFQKPK                    | 545  | 15 | 3  | 24.68  | b6b12b13                                                          | 1782.94 | 74.570  | 96558  | 2 | 891.97  | 3.218   |

|                             |     |                       |                                         |      |    |    |       |                                 |         |         |       |   |         |         |
|-----------------------------|-----|-----------------------|-----------------------------------------|------|----|----|-------|---------------------------------|---------|---------|-------|---|---------|---------|
| IP35579 MYH9_HUMAN Myosin-9 | 91  |                       | EQLEEEEAKHNLEK                          | 1342 | 15 | 11 | 68.96 | b3°b3y4*y4y7y9y11°y11*y11y12y13 | 1854.86 | 35.015  | 94792 | 3 | 618.96  | -4.607  |
| IP35579 MYH9_HUMAN Myosin-9 | 92  |                       | KFDQLLAEK                               | 1444 | 10 | 3  | 24.99 | b3b5y4                          | 1220.65 | 48.834  | 85674 | 2 | 610.83  | -2.300  |
| IP35579 MYH9_HUMAN Myosin-9 | 93  |                       | RGDLPFVVR                               | 1922 | 10 | 8  | 84.8  | b3°b3b4b6b7y5y6y7               | 1155.66 | 60.817  | 74196 | 2 | 578.33  | -6.443  |
| IP35579 MYH9_HUMAN Myosin-9 | 94  |                       | KANLQIDQINTDLNLER                       | 1753 | 17 | 10 | 60.37 | b4*b4b8b12b14y5y6y8y11*y11      | 1998.03 | 65.806  | 66069 | 3 | 666.68  | -13.685 |
| IP35579 MYH9_HUMAN Myosin-9 | 95  |                       | ELESQISELQEDLESERASR                    | 1107 | 20 | 6  | 33.44 | b3°b3b4y7y11y13                 | 2348.13 | 81.839  | 55703 | 3 | 783.38  | 3.951   |
| IP35579 MYH9_HUMAN Myosin-9 | 96  |                       | YLYVDKFNFINPLAQADWAAK                   | 8    | 21 | 5  | 27.14 | b3b9y5y10y11                    | 2454.24 | 83.125  | 54540 | 3 | 818.75  | -3.084  |
| IP35579 MYH9_HUMAN Myosin-9 | 97  |                       | AGKLDPHLVLDQLR                          | 679  | 14 | 7  | 57.48 | b4b5b7y3y6y7y9                  | 1574.88 | 66.385  | 52448 | 3 | 525.63  | -13.177 |
| IP35579 MYH9_HUMAN Myosin-9 | 98  |                       | TELADKVTK                               | 1268 | 9  | 3  | 28.49 | b3y3y7                          | 1004.56 | 26.246  | 50634 | 2 | 502.78  | -5.529  |
| IP35579 MYH9_HUMAN Myosin-9 | 99  | Carbamidomethyl+C(14) | KLEEEQIILEDQNCK                         | 974  | 15 | 5  | 48.49 | b7b8y6y7y8                      | 1888.91 | 51.010  | 37429 | 3 | 630.31  | -10.081 |
| IP35579 MYH9_HUMAN Myosin-9 | 100 |                       | DLEAHIDSANKNR                           | 1620 | 13 | 11 | 67    | b7b9°b9y3*y3y4*y4y6*y6y7y8      | 1482.72 | 31.542  | 35527 | 3 | 494.91  | -4.775  |
| IP35579 MYH9_HUMAN Myosin-9 | 101 |                       | AQQAADKYLYVDK                           | 1    | 13 | 7  | 29.85 | b4b6°b6*b6b7°b7y11              | 1512.75 | 81.234  | 35398 | 2 | 756.88  | -14.202 |
| IP35579 MYH9_HUMAN Myosin-9 | 102 |                       | ALEQQVEEMKTQLELEDELQAT<br>EDAK          | 1528 | 27 | 9  | 46.6  | b4°b4b5b6b13y5°y5y10y11         | 3147.51 | 104.711 | 35376 | 3 | 1049.84 | 6.438   |
| IP35579 MYH9_HUMAN Myosin-9 | 103 |                       | TDLLLEPYNKYR                            | 289  | 12 | 4  | 20.51 | b9°b9y4y6                       | 1524.79 | 60.825  | 33535 | 3 | 508.94  | -8.726  |
| IP35579 MYH9_HUMAN Myosin-9 | 104 |                       | HSQAVEELAEQLEQTKR                       | 1193 | 17 | 9  | 39.06 | b4*b4b5*b5b9*b9b14y8y13         | 1995.98 | 65.869  | 28836 | 3 | 666.00  | -14.127 |
| IP35579 MYH9_HUMAN Myosin-9 | 105 | Carbamidomethyl+C(8)  | KMEDSVGCLETAEEVK                        | 1371 | 16 | 7  | 48.1  | b13y7°y7y8y9y10°y10             | 1824.83 | 49.812  | 27477 | 3 | 608.95  | -5.218  |
| IP35579 MYH9_HUMAN Myosin-9 | 106 |                       | SGFEPASLKKEEVGEEAIVELVEN<br>K           | 38   | 25 | 3  | 17.85 | b8b11b13                        | 2660.30 | 124.050 | 26613 | 3 | 887.44  | -11.838 |
| IP35579 MYH9_HUMAN Myosin-9 | 107 |                       | RHEMPPHIYAITDTAYR                       | 142  | 17 | 6  | 31.08 | b7b9y3y5°y5y6                   | 2071.03 | 108.167 | 23898 | 3 | 691.02  | 6.955   |
| IP35579 MYH9_HUMAN Myosin-9 | 108 |                       | VKLQEMEGTVK                             | 1791 | 11 | 4  | 34.12 | b3y4y5y7                        | 1261.67 | 41.399  | 23854 | 3 | 421.23  | -13.255 |
| IP35579 MYH9_HUMAN Myosin-9 | 109 |                       | KVEAQLQELQVK                            | 1248 | 12 | 3  | 27.71 | y4y10y11                        | 1412.81 | 48.402  | 23315 | 2 | 706.91  | 2.160   |
| IP35579 MYH9_HUMAN Myosin-9 | 110 |                       | IAQLEEELEEEQGNTLINDRLK                  | 1730 | 23 | 3  | 18.52 | b3b7b9                          | 2713.35 | 107.458 | 22035 | 4 | 679.09  | 0.540   |
| IP35579 MYH9_HUMAN Myosin-9 | 111 |                       | FIRINFDVNGYIVGANIETYLLEK                | 237  | 24 | 6  | 21.14 | b10*b10b11°b11*b11y7            | 2801.47 | 99.897  | 20127 | 2 | 1401.24 | -6.623  |
| IP35579 MYH9_HUMAN Myosin-9 | 112 | Carbamidomethyl+C(14) | YYSGLIYTYSGLFCVVINPYKNLPI<br>YSEEIVEMYK | 104  | 35 | 3  | 10.91 | b5y10y24                        | 4229.05 | 117.425 | 16237 | 5 | 846.62  | -8.890  |
| IP35579 MYH9_HUMAN Myosin-9 | 113 | Carbamidomethyl+C(16) | ERYYSGLIYTYSGLFCVVINPYK                 | 102  | 23 | 3  | 12.12 | b9b15y12                        | 2805.42 | 129.196 | 14482 | 3 | 935.81  | 10.008  |
| IP35579 MYH9_HUMAN Myosin-9 | 114 |                       | NLPYSEEIVEMYKKGK                        | 125  | 16 | 3  | 15.7  | b8y9y14                         | 1912.95 | 76.933  | 8417  | 3 | 638.32  | -12.188 |
| IP35579 MYH9_HUMAN Myosin-9 | 115 |                       | QVEDEKNSFR                              | 1332 | 10 | 3  | 26.75 | b7y6y7                          | 1251.60 | 57.896  | 8256  | 2 | 626.30  | -0.390  |
| IP35579 MYH9_HUMAN Myosin-9 | 116 |                       | KMQQNIQLEEELEEEESAR                     | 939  | 20 | 6  | 36.08 | b11b12y8°y8y9y11                | 2461.16 | 69.496  | 8020  | 3 | 821.06  | 2.678   |
| IP35579 MYH9_HUMAN Myosin-9 | 117 |                       | TQLEELEDQATEDAKLR                       | 1538 | 19 | 5  | 26.48 | b10b11y9°y9y11                  | 2231.11 | 110.066 | 6463  | 3 | 744.38  | 3.392   |
| IP35579 MYH9_HUMAN Myosin-9 | 118 |                       | ERNTDQASMPDNTAAQK                       | 356  | 17 | 6  | 27.76 | b8°b8*b8b9y4y8                  | 1876.85 | 24.569  | 4637  | 3 | 626.29  | 2.472   |
| IP35579 MYH9_HUMAN Myosin-9 | 119 |                       | QLAAENRLTEMETLQSQLMAEK                  | 860  | 22 | 5  | 18.94 | y10°y10*y10y15y19               | 2534.23 | 105.689 | 4234  | 3 | 845.41  | -11.560 |
| IP35579 MYH9_HUMAN Myosin-9 | 120 |                       | VDYKADEWLMK                             | 576  | 11 | 6  | 44.35 | b3b8b9y6°y6y9                   | 1397.69 | 62.829  | 4093  | 2 | 699.35  | 6.900   |
| IP35579 MYH9_HUMAN Myosin-9 | 121 |                       | ATDKSFVEK                               | 536  | 9  | 4  | 42.7  | b6y3y4y6                        | 1024.53 | 23.258  | 3055  | 2 | 512.77  | 2.502   |
| IP35579 MYH9_HUMAN Myosin-9 | 122 | Carbamidomethyl+C(6)  | DKADFCIIHYAGK                           | 563  | 13 | 3  | 18.95 | b5b9y10                         | 1537.73 | 58.583  | 2741  | 2 | 769.37  | -8.415  |
| IP35579 MYH9_HUMAN Myosin-9 | 123 |                       | QELEKTR                                 | 1043 | 7  | 3  | 38.32 | b4b6y4                          | 903.48  | 43.318  | 2658  | 2 | 452.24  | -10.539 |
| IP35579 MYH9_HUMAN Myosin-9 | 124 |                       | QRSMVAAR                                | 1603 | 9  | 3  | 28.49 | b5b7y4                          | 989.54  | 63.529  | 2455  | 2 | 495.27  | 5.551   |
| IP35579 MYH9_HUMAN Myosin-9 | 125 |                       | ATYERMFR                                | 419  | 8  | 4  | 34.03 | b6y3y5°y5                       | 1073.52 | 63.467  | 2280  | 2 | 537.26  | -2.161  |
| IP35579 MYH9_HUMAN Myosin-9 | 126 |                       | ALEEAMEQKAELEER                         | 1483 | 14 | 3  | 23.11 | b4y4y5                          | 1646.79 | 46.781  | 2243  | 3 | 549.60  | -10.007 |
| IP35579 MYH9_HUMAN Myosin-9 | 127 |                       | LLEDRIAFTTNLTTEEEK                      | 995  | 19 | 5  | 21.65 | b4y3y7°y7y10                    | 2280.09 | 94.423  | 2108  | 2 | 1140.55 | -14.776 |
| IP35579 MYH9_HUMAN Myosin-9 | 128 |                       | RQLEEAEEEAQR                            | 1876 | 12 | 6  | 31.71 | b7°b7*b7b10b11y4                | 1487.72 | 58.582  | 2103  | 2 | 744.37  | 9.764   |
| IP35579 MYH9_HUMAN Myosin-9 | 129 |                       | EEELQAALARVEEEAAQK                      | 1081 | 18 | 6  | 22.74 | b12y3y5*y5y7*y7                 | 2013.98 | 78.939  | 1903  | 2 | 1007.50 | -11.940 |
| IP35579 MYH9_HUMAN Myosin-9 | 130 |                       | YAEERDR                                 | 1459 | 7  | 5  | 35.31 | b5°b5y5y6°y6                    | 938.44  | 42.618  | 1870  | 1 | 938.44  | 2.537   |
| IP35579 MYH9_HUMAN Myosin-9 | 131 |                       | DVDRIIGLDQVAGMSETALPGAFK                | 613  | 24 | 4  | 21.8  | b13y11y12y15                    | 2503.26 | 103.581 | 1838  | 3 | 835.09  | -8.778  |
| IP35579 MYH9_HUMAN Myosin-9 | 132 |                       | HEAMITDLEERLR                           | 1024 | 13 | 6  | 50.57 | b5b6b9b12y3y8                   | 1612.81 | 65.881  | 1809  | 3 | 538.27  | -2.801  |
| IP35579 MYH9_HUMAN Myosin-9 | 133 |                       | QFRTEMEDLMSSK                           | 1500 | 13 | 4  | 31.61 | b4y7y9y12                       | 1601.74 | 79.427  | 1722  | 2 | 801.38  | 8.231   |

|                                 |     |                       |                                   |      |    |    |        |                                                                      |         |         |        |   |         |         |
|---------------------------------|-----|-----------------------|-----------------------------------|------|----|----|--------|----------------------------------------------------------------------|---------|---------|--------|---|---------|---------|
| P35579 MYH9_HUMAN Myosin-9      | 134 |                       | DLEGLSQRHEEK                      | 1392 | 12 | 8  | 29.65  | b4b7b7y8°y8*y8y10°y10                                                | 1440.70 | 98.006  | 1702   | 3 | 480.90  | -6.185  |
| P35579 MYH9_HUMAN Myosin-9      | 135 | Phosphoryl STY(11)    | HEMPPHIYAITDTAYR                  | 143  | 16 | 5  | 22.03  | b4_H3PO4 b4b9y5°y5y7                                                 | 1994.87 | 44.894  | 44717  | 3 | 665.63  | -1.040  |
| P35579 MYH9_HUMAN Myosin-9      | 136 | Phosphoryl STY(9)     | DLQGRDEQSEEK                      | 1571 | 12 | 7  | 40.86  | b4b7b8°b8y3y5*y5                                                     | 1513.60 | 33.478  | 8129   | 2 | 757.30  | -5.887  |
| P35579 MYH9_HUMAN Myosin-9      | 137 | Phosphoryl STY(11)    | LQRELEDATETADAMNREVSSLK           | 1895 | 23 | 7  | 25.77  | b6b7b11_HPO3<br>b11y9y12°y12*y12                                     | 2686.25 | 136.428 | 6538   | 2 | 1343.63 | 6.816   |
| P35579 MYH9_HUMAN Myosin-9      | 138 | Phosphoryl STY()      | NLPIYSEEVEMYK                     | 125  | 14 | 4  | 17.67  | b9°b9y7y10                                                           | 1807.81 | 76.261  | 3715   | 2 | 904.41  | -0.338  |
| P35579 MYH9_HUMAN Myosin-9      | 139 | Phosphoryl STY(6)     | IRELESQISELQEDLESER               | 1105 | 19 | 4  | 21.65  | b6_H3PO4 b6y6y10y13                                                  | 2383.09 | 66.515  | 1554   | 4 | 596.53  | -1.229  |
| P35579 MYH9_HUMAN Myosin-9      | 140 | Oxidation+M(12)       | LTEMETLQSQLMAEK                   | 867  | 15 | 3  | 16.6   | b7b11y13                                                             | 1767.85 | 104.945 | 101525 | 2 | 884.43  | -1.243  |
| P35579 MYH9_HUMAN Myosin-9      | 141 | Oxidation+M(12)       | ELEDATETADAMNR                    | 1898 | 14 | 5  | 23.11  | b3°b3b4°b4y10                                                        | 1581.69 | 43.272  | 10738  | 2 | 791.35  | 12.040  |
| P35579 MYH9_HUMAN Myosin-9      | 142 | Oxidation+M(2)        | NMDPLNDNIATLLHQSSDK               | 587  | 19 | 4  | 13.7   | b12y7y13*y13                                                         | 2142.03 | 108.115 | 5561   | 2 | 1071.52 | 8.890   |
| P35579 MYH9_HUMAN Myosin-9      | 143 | Oxidation+M(2)        | IMGPIEEEQMLLR                     | 327  | 14 | 6  | 25.19  | b11b13y8°y8y10°y10                                                   | 1631.81 | 69.536  | 5172   | 2 | 816.41  | -0.374  |
| P35579 MYH9_HUMAN Myosin-9      | 144 | Oxidation+M(12)       | NLPIYSEEVEMYK                     | 125  | 14 | 5  | 17.67  | b8°b8y9°y9y12                                                        | 1743.87 | 106.364 | 4133   | 2 | 872.44  | 11.830  |
| P35579 MYH9_HUMAN Myosin-9      | 145 | Oxidation+M(4)        | HEAMITDLEER                       | 1024 | 11 | 8  | 74.49  | b4b5b10y3y5°y5y6y9                                                   | 1359.61 | 32.076  | 1627   | 2 | 680.31  | -8.350  |
| P35579 MYH9_HUMAN Myosin-9      | 146 | Oxidation+M(15)       | LQRELEDATETADAMNREVSSLK           | 1895 | 23 | 6  | 22.1   | b9b10°b10b12y12°y12                                                  | 2622.30 | 110.510 | 1555   | 2 | 1311.66 | 13.500  |
| P35579 MYH9_HUMAN Myosin-9      | 147 | Carbamidomethyl+C(2)  | FCIIHYAGK                         | 567  | 9  | 0  | 2.88   |                                                                      | 1108.55 | 58.847  | 16880  | 2 | 554.78  | -11.562 |
| P35579 MYH9_HUMAN Myosin-9      | 148 |                       | GVLAHLEEER                        | 765  | 10 | 0  | 2.88   |                                                                      | 1152.60 | 49.815  | 11985  | 2 | 576.80  | -2.224  |
| P35579 MYH9_HUMAN Myosin-9      | 149 | Carbamidomethyl+C(7)  | MEDSVGCLLETAEV                    | 1372 | 14 | 0  | 5.28   |                                                                      | 1568.63 | 48.614  | 11030  | 2 | 784.82  | -8.638  |
| P35579 MYH9_HUMAN Myosin-9      | 150 |                       | PHLVLDQLR                         | 684  | 9  | 1  | 7.55   | b3                                                                   | 1090.64 | 71.289  | 10844  | 2 | 545.82  | 0.336   |
| P35579 MYH9_HUMAN Myosin-9      | 151 | Carbamidomethyl+C(3)  | DFCIIHYAGK                        | 566  | 10 | 1  | 7.55   | b3                                                                   | 1223.60 | 58.842  | 10060  | 2 | 612.30  | 8.280   |
| P35579 MYH9_HUMAN Myosin-9      | 152 |                       | QYLAYVASSHK                       | 188  | 11 | 2  | 7.26   | b3*b3                                                                | 1266.65 | 60.979  | 9450   | 2 | 633.83  | 5.204   |
| P35579 MYH9_HUMAN Myosin-9      | 153 |                       | LAHLEEER                          | 767  | 8  | 3  | 29.45  | b3b6b7                                                               | 996.50  | 49.810  | 6266   | 2 | 498.76  | -6.676  |
| P35579 MYH9_HUMAN Myosin-9      | 154 | Carbamidomethyl+C(13) | SMMQDREDQSIQLCTGES                | 159  | 17 | 1  | 8.1    | y7                                                                   | 1986.80 | 49.804  | 3024   | 2 | 993.90  | -9.277  |
| P35579 MYH9_HUMAN Myosin-9      | 155 |                       | DPHLVLDQLR                        | 683  | 10 | 1  | 7.55   | b3                                                                   | 1205.66 | 71.283  | 2954   | 2 | 603.33  | -5.872  |
| P35579 MYH9_HUMAN Myosin-9      | 156 |                       | AHLEEER                           | 768  | 7  | 2  | 20.8   | b3b4                                                                 | 883.43  | 49.791  | 2000   | 2 | 442.22  | 0.345   |
| P35579 MYH9_HUMAN Myosin-9      | 157 |                       | QIATLHAQVADMK                     | 1357 | 13 | 0  | 3.84   |                                                                      | 1408.72 | 46.723  | 6611   | 3 | 470.24  | -1.820  |
| P35579 MYH9_HUMAN Myosin-9      | 158 |                       | ASITALEAK                         | 1806 | 9  | 0  | 1.92   |                                                                      | 885.49  | 42.338  | 2828   | 2 | 443.25  | -5.376  |
| P35579 MYH9_HUMAN Myosin-9      | 159 |                       | THEAQIEMR                         | 1181 | 10 | 0  | 2.4    |                                                                      | 1225.55 | 29.033  | 1843   | 3 | 409.19  | -9.462  |
| P35579 MYH9_HUMAN Myosin-9      | 160 |                       | DLEGLSQR                          | 1392 | 8  | 0  | 1.44   |                                                                      | 899.45  | 39.411  | 1841   | 2 | 450.23  | -7.057  |
| P06733 ENOA_HUMAN Alpha-enolase | 1   |                       | YISPDQLADLYK                      | 269  | 12 | 5  | 34.72  | b5y3y5y10y12                                                         | 1425.73 | 73.307  | 90912  | 2 | 713.37  | 1.370   |
| P06733 ENOA_HUMAN Alpha-enolase | 2   |                       | HIADLAGNSEVILPVPFNVINGGS<br>HAGNK | 132  | 30 | 22 | 124.34 | b2b4b5b6b7b8b10°b10b11b12<br>b15y2y7y8*y8y15°y15*y15y1<br>7y18y19y30 | 3011.54 | 84.709  | 72893  | 4 | 753.64  | -9.404  |
| P06733 ENOA_HUMAN Alpha-enolase | 3   |                       | AAVPSGASTGIYEALRLR                | 32   | 18 | 8  | 51.2   | b7b12y7y10y13y14y15y18                                               | 1804.95 | 78.562  | 51936  | 2 | 902.98  | 3.787   |
| P06733 ENOA_HUMAN Alpha-enolase | 4   | Carbamidomethyl+C(14) | VNQIGSVTESLQACK                   | 343  | 15 | 10 | 66.51  | b15y3y4*y4y9y10y11y12y15*<br>y15                                     | 1633.82 | 54.275  | 48574  | 2 | 817.41  | 0.000   |
| P06733 ENOA_HUMAN Alpha-enolase | 5   |                       | LAMQEFMLPVGAANFR                  | 162  | 17 | 11 | 73.8   | b6y2y3y4y6*y6y7y8y9y13y17                                            | 1908.00 | 100.277 | 47621  | 2 | 954.50  | 5.758   |
| P06733 ENOA_HUMAN Alpha-enolase | 6   |                       | SFIKDYPPVSIEDPFDQDDWGAW<br>QK     | 281  | 25 | 12 | 61.91  | b2b5b6b8b13°b13y3y5y6y8y9<br>y13                                     | 2985.40 | 95.410  | 39415  | 3 | 995.80  | 0.654   |
| P06733 ENOA_HUMAN Alpha-enolase | 7   |                       | DATNVGDEGGFAPNILENKEGLEL<br>LK    | 202  | 26 | 4  | 16.81  | b5y3y14y21                                                           | 2743.37 | 84.741  | 35340  | 3 | 915.13  | -1.335  |
| P06733 ENOA_HUMAN Alpha-enolase | 8   |                       | IGAEVYHNLK                        | 183  | 10 | 6  | 67.68  | y3y4y5y7y9y10                                                        | 1143.62 | 39.247  | 23048  | 2 | 572.31  | 0.961   |
| P06733 ENOA_HUMAN Alpha-enolase | 9   |                       | AAVPSGASTGIYEALRLDNDK             | 32   | 22 | 6  | 26.42  | b2b3b8y3y4y9                                                         | 2277.13 | 68.735  | 7880   | 3 | 759.71  | -3.002  |
| P06733 ENOA_HUMAN Alpha-enolase | 10  |                       | FTASAGIQVVGDDLTVTNP               | 306  | 20 | 5  | 27.95  | b12b14y8y17y18                                                       | 2033.08 | 71.768  | 5087   | 3 | 678.36  | 11.949  |
| P06733 ENOA_HUMAN Alpha-enolase | 11  |                       | GNPTVEVDLFTSK                     | 15   | 13 | 7  | 27.21  | b3b9b13y10y12y13*y13                                                 | 1406.71 | 68.095  | 1873   | 1 | 1406.71 | -2.083  |

|                                                        |    |                       |                                |     |    |    |        |                                                                                                       |         |         |         |   |         |         |
|--------------------------------------------------------|----|-----------------------|--------------------------------|-----|----|----|--------|-------------------------------------------------------------------------------------------------------|---------|---------|---------|---|---------|---------|
| P06733 ENOA_HUMAN Alpha-enolase                        | 12 |                       | LAQANGWGVMSHR                  | 358 | 14 | 9  | 68.15  | b5y3y4y7y10y10y11y12y12                                                                               | 1525.74 | 55.129  | 41750   | 3 | 509.25  | -18.081 |
| P06733 ENOA_HUMAN Alpha-enolase                        | 13 |                       | AGYTDK                         | 233 | 6  | 1  | 12.93  | b4                                                                                                    | 654.31  | 40.289  | 4260    | 1 | 654.31  | 0.560   |
| P06733 ENOA_HUMAN Alpha-enolase                        | 14 |                       | KLNVTQEK                       | 80  | 9  | 6  | 54.74  | y3y3y5y5y7y8                                                                                          | 1088.60 | 21.876  | 5331    | 2 | 544.80  | 2.579   |
| P06733 ENOA_HUMAN Alpha-enolase                        | 15 |                       | IHAREIFDSR                     | 5   | 10 | 4  | 24.99  | b3y4y4y9                                                                                              | 1243.66 | 91.350  | 1960    | 2 | 622.33  | 5.693   |
| P06733 ENOA_HUMAN Alpha-enolase                        | 16 | Carbamidomethyl+C(14) | VNQIGSVTESLQACKLAQANGWGMVMSHR  | 343 | 29 | 5  | 11.05  | b6*b6b13y11y11                                                                                        | 3140.55 | 107.340 | 1845    | 4 | 785.89  | -6.685  |
| P06733 ENOA_HUMAN Alpha-enolase                        | 17 |                       | EAMRIGAEVYHNLK                 | 179 | 14 | 4  | 17.67  | b8*b8b11y5                                                                                            | 1630.83 | 41.281  | 1590    | 3 | 544.28  | -3.593  |
| P06733 ENOA_HUMAN Alpha-enolase                        | 18 |                       | NSEVILPVPAPFNVIINGGSHAGNK      | 139 | 23 | 1  | 10.48  | b4                                                                                                    | 2334.20 | 84.670  | 7605    | 3 | 778.74  | -9.518  |
| P06733 ENOA_HUMAN Alpha-enolase                        | 19 |                       | DLTVTNPK                       | 318 | 8  | 0  | 7.2    |                                                                                                       | 887.49  | 71.830  | 5061    | 1 | 887.49  | 10.591  |
| P06733 ENOA_HUMAN Alpha-enolase                        | 20 |                       | EVYHNLK                        | 186 | 7  | 0  | 2.4    |                                                                                                       | 902.48  | 39.285  | 1700    | 2 | 451.74  | 6.154   |
| P19105 MRLC3_HUMAN Myosin regulatory light chain MRLC3 | 1  |                       | LNGTDPEDVIR                    | 92  | 11 | 11 | 96.49  | b5*b5b7b10y1y3y4y6y8y9y9                                                                              | 1228.62 | 48.795  | 104788  | 2 | 614.81  | -0.497  |
| P19105 MRLC3_HUMAN Myosin regulatory light chain MRLC3 | 2  |                       | GNFNIEFTR                      | 150 | 10 | 13 | 70.13  | b2*b2b9*b9y4y4y5y6y7y8*y8y10*y10                                                                      | 1260.60 | 67.043  | 87925   | 2 | 630.80  | -0.968  |
| P19105 MRLC3_HUMAN Myosin regulatory light chain MRLC3 | 3  |                       | ATSNVFAMFDQSQIQEFK             | 16  | 18 | 10 | 28.14  | b2*b2b5b14*b14y2y4y10y12y18                                                                           | 2091.00 | 90.131  | 66351   | 2 | 1046.00 | 6.655   |
| P19105 MRLC3_HUMAN Myosin regulatory light chain MRLC3 | 4  |                       | FTDEEVDLYR                     | 132 | 11 | 5  | 22.46  | b3*b3y5y9y11                                                                                          | 1415.64 | 59.391  | 46143   | 2 | 708.32  | 3.449   |
| P19105 MRLC3_HUMAN Myosin regulatory light chain MRLC3 | 5  |                       | ELLTIMGDR                      | 123 | 9  | 5  | 51.73  | y3y5y6y7y9                                                                                            | 1035.51 | 48.837  | 27690   | 2 | 518.26  | -0.943  |
| P19105 MRLC3_HUMAN Myosin regulatory light chain MRLC3 | 6  |                       | EAFNMIDQNR                     | 34  | 10 | 3  | 31.98  | y3y8y9                                                                                                | 1237.56 | 51.416  | 18305   | 2 | 619.29  | 1.578   |
| P19105 MRLC3_HUMAN Myosin regulatory light chain MRLC3 | 7  |                       | ELLTIMGDRFTDEEVDLYR            | 123 | 20 | 4  | 13.21  | b11y8*y8y11                                                                                           | 2432.13 | 79.555  | 46205   | 3 | 811.38  | 1.205   |
| O14950 MRLC2_HUMAN Myosin regulatory light chain MRLC2 | 1  |                       | LNGTDPEDVIR                    | 93  | 11 | 11 | 96.49  | b5*b5b7b10y1y3y4y6y8y9y9                                                                              | 1228.62 | 48.795  | 104788  | 2 | 614.81  | -0.497  |
| O14950 MRLC2_HUMAN Myosin regulatory light chain MRLC2 | 2  |                       | GNFNIEFTR                      | 151 | 10 | 13 | 70.13  | b2*b2b9*b9y4y4y5y6y7y8*y8y10*y10                                                                      | 1260.60 | 67.043  | 87925   | 2 | 630.80  | -0.968  |
| O14950 MRLC2_HUMAN Myosin regulatory light chain MRLC2 | 3  |                       | ATSNVFAMFDQSQIQEFK             | 17  | 18 | 10 | 28.14  | b2*b2b5b14*b14y2y4y10y12y18                                                                           | 2091.00 | 90.131  | 66351   | 2 | 1046.00 | 6.655   |
| O14950 MRLC2_HUMAN Myosin regulatory light chain MRLC2 | 4  |                       | FTDEEVDLYR                     | 133 | 11 | 5  | 22.46  | b3*b3y5y9y11                                                                                          | 1415.64 | 59.391  | 46143   | 2 | 708.32  | 3.449   |
| O14950 MRLC2_HUMAN Myosin regulatory light chain MRLC2 | 5  |                       | ELLTIMGDR                      | 124 | 9  | 5  | 51.73  | y3y5y6y7y9                                                                                            | 1035.51 | 48.837  | 27690   | 2 | 518.26  | -0.943  |
| O14950 MRLC2_HUMAN Myosin regulatory light chain MRLC2 | 6  |                       | EAFNMIDQNR                     | 35  | 10 | 3  | 31.98  | y3y8y9                                                                                                | 1237.56 | 51.416  | 18305   | 2 | 619.29  | 1.578   |
| O14950 MRLC2_HUMAN Myosin regulatory light chain MRLC2 | 7  |                       | NPTDAYLDAMMNEAPGPINFTMFLTMFGEK | 63  | 30 | 4  | 10.98  | b12y10y12y12                                                                                          | 3366.53 | 102.340 | 1925    | 3 | 1122.85 | 3.771   |
| Q9BYX7 ACTK_HUMAN Kappa-actin                          | 1  |                       | SYELPDGQVITIGNER               | 238 | 16 | 39 | 218.65 | b2b3*b3b4*b4b5*b5b8*b8b9*b9b10b12*b12b13y1y2y2y4y4*y4y5y5y6*y6y6y7y7y8y10*y10y11y11y12y12y12y13y14y16 | 1790.88 | 71.814  | 1483661 | 2 | 895.94  | -5.589  |
| Q9BYX7 ACTK_HUMAN Kappa-actin                          | 2  |                       | QEYDESGPSIVHRK                 | 359 | 14 | 17 | 131.76 | b4*b4*b4y2y3y4y5y6y7y8y9y10y10y11y12y14*y14                                                           | 1644.78 | 31.699  | 325281  | 3 | 548.93  | -9.797  |
| Q9BYX7 ACTK_HUMAN Kappa-actin                          | 3  |                       | QEYDESGPSIVHR                  | 359 | 13 | 10 | 88     | y3y4y5y6y8y10y10y11y13*y13                                                                            | 1516.69 | 37.635  | 152198  | 3 | 506.23  | -9.417  |
| Q9BYX7 ACTK_HUMAN Kappa-actin                          | 4  |                       | DLYTNTVLSGGTMYPGIAHR           | 291 | 21 | 5  | 17.07  | b6b14*b14y10y14                                                                                       | 2267.12 | 79.348  | 7351    | 3 | 756.38  | 3.446   |

|                                              |    |                                                                         |                                      |     |    |    |        |                                                                      |         |         |        |   |         |         |
|----------------------------------------------|----|-------------------------------------------------------------------------|--------------------------------------|-----|----|----|--------|----------------------------------------------------------------------|---------|---------|--------|---|---------|---------|
| Q9BYX7 ACTK_HUMAN Kappa-actin                | 5  | Carbamidomethyl+C(1);<br>Carbamidomethyl+C(9);<br>Carbamidomethyl+C(16) | CPEALFQPCFLGMESCGIHK                 | 256 | 20 | 5  | 21.34  | b5b6°b6y7°y7                                                         | 2381.08 | 68.841  | 65895  | 4 | 596.03  | 10.869  |
| Q9BYX7 ACTK_HUMAN Kappa-actin                | 6  |                                                                         | IWHHTFYNELR                          | 84  | 11 | 8  | 92.96  | b3b5b6b9y5y6y7y8                                                     | 1515.73 | 57.966  | 54440  | 3 | 505.92  | -12.322 |
| Q9BYX7 ACTK_HUMAN Kappa-actin                | 7  |                                                                         | HQGMMEGMHQK                          | 39  | 11 | 7  | 52.59  | b3b4*b4b6b10°b10y6                                                   | 1313.58 | 31.563  | 19282  | 2 | 657.29  | 18.308  |
| Q9BYX7 ACTK_HUMAN Kappa-actin                | 8  |                                                                         | YSVWVGGSilASLSTFQQMWISK              | 336 | 23 | 6  | 25.77  | b4b8°b8y3y5y6                                                        | 2588.29 | 51.827  | 5151   | 2 | 1294.65 | -10.942 |
| Q9BYX7 ACTK_HUMAN Kappa-actin                | 9  |                                                                         | ESYVGK                               | 50  | 6  | 1  | 12.93  | b5                                                                   | 682.35  | 71.748  | 4195   | 1 | 682.35  | 13.239  |
| Q9BYX7 ACTK_HUMAN Kappa-actin                | 10 | Carbamidomethyl+C(2)                                                    | LCYVALDSEQEMAMAASSSSVEK              | 215 | 23 | 3  | 21.15  | b6y5y6                                                               | 2506.14 | 94.394  | 2121   | 3 | 836.05  | 11.788  |
| Q9BYX7 ACTK_HUMAN Kappa-actin                | 11 |                                                                         | EITALAPSIMK                          | 315 | 11 | 6  | 38.89  | b6b7b8°b8y5°y5                                                       | 1173.65 | 55.626  | 1571   | 2 | 587.33  | -4.472  |
| Q9BYX7 ACTK_HUMAN Kappa-actin                | 12 |                                                                         | AGFAGDDAPQAVFPISVGRPRHQ<br>GMMEGMHQK | 18  | 32 | 4  | 12.54  | b5b17y3y15                                                           | 3422.58 | 119.063 | 10160  | 5 | 685.32  | -13.410 |
| Q9BYX7 ACTK_HUMAN Kappa-actin                | 13 | Phosphoryl STY()                                                        | IWHHTFYNELR                          | 84  | 11 | 6  | 38.71  | b5b6°b6y8_H3PO4 y8y9°y9                                              | 1595.70 | 42.609  | 1813   | 2 | 798.36  | -0.995  |
| Q9BYX7 ACTK_HUMAN Kappa-actin                | 14 | Oxidation+M(8)                                                          | HQGMMEGMHQKESYVGKEAQS<br>K           | 39  | 22 | 3  | 12.43  | b3y15y20                                                             | 2536.16 | 87.399  | 331414 | 3 | 846.06  | 7.220   |
| Q9BYX7 ACTK_HUMAN Kappa-actin                | 15 | Carbamidomethyl+C(17)<br>;Oxidation+M(16)                               | MDDDTAVLVIDNGSGMCK                   | 0   | 18 | 3  | 21.43  | b9b11b13                                                             | 1956.83 | 45.961  | 3844   | 2 | 978.92  | -2.745  |
| Q9BYX7 ACTK_HUMAN Kappa-actin                | 16 | Oxidation+M(14)                                                         | DLYTNTVLSSGTTMYPGIAHR                | 291 | 21 | 6  | 24.13  | b10b15y9y11°y11y14                                                   | 2283.10 | 84.968  | 1921   | 3 | 761.71  | -2.994  |
| Q9BYX7 ACTK_HUMAN Kappa-actin                | 17 |                                                                         | YTNTVLSSGTTMYPGIAHR                  | 293 | 19 | 1  | 8.1    | b13                                                                  | 2038.98 | 79.403  | 4358   | 2 | 1019.99 | -11.914 |
| Q9BYX7 ACTK_HUMAN Kappa-actin                | 18 |                                                                         | QEYDESGPSIVHRK                       | 359 | 14 | 1  | 7.23   | y10                                                                  | 1626.76 | 31.696  | 22797  | 4 | 407.45  | -11.256 |
| Q9BYX7 ACTK_HUMAN Kappa-actin                | 19 |                                                                         | QEYDESGPSIVHR                        | 359 | 13 | 0  | 3.84   |                                                                      | 1499.68 | 37.651  | 11277  | 3 | 500.57  | 6.756   |
| P02042 HBD_HUMAN Hemoglobin<br>subunit delta | 1  |                                                                         | LLVVPWTQR                            | 31  | 10 | 18 | 109.71 | b2b3b4b5y1y2*y2y3*y3y4*y4<br>y5°y5*y5y6y7y8y10                       | 1274.72 | 78.838  | 591442 | 2 | 637.87  | -1.436  |
| P02042 HBD_HUMAN Hemoglobin<br>subunit delta | 2  |                                                                         | VVAGVANALAHK                         | 133 | 12 | 12 | 107.66 | b2b3b4y2y3y4y5y7y8y9y10y1<br>2                                       | 1149.67 | 42.294  | 100661 | 2 | 575.34  | -0.425  |
| P02042 HBD_HUMAN Hemoglobin<br>subunit delta | 3  |                                                                         | VHLTPEEK                             | 1   | 8  | 7  | 46.48  | b2b3y2y3y4y6y8                                                       | 952.51  | 26.362  | 66214  | 2 | 476.76  | -4.101  |
| P02042 HBD_HUMAN Hemoglobin<br>subunit delta | 4  |                                                                         | LHVDPENFR                            | 96  | 9  | 5  | 42.19  | b2b3b4y3y5                                                           | 1126.56 | 47.065  | 41379  | 2 | 563.79  | 0.542   |
| P02042 HBD_HUMAN Hemoglobin<br>subunit delta | 5  |                                                                         | VLGAFSDGLAHLDNLK                     | 67  | 16 | 10 | 93.14  | b3y3y4y5y6y7y9y11y12°y12                                             | 1669.86 | 76.744  | 320414 | 3 | 557.29  | -17.983 |
| P02042 HBD_HUMAN Hemoglobin<br>subunit delta | 6  |                                                                         | FFESFGDLSSPDVVMGNPK                  | 41  | 19 | 7  | 26.64  | b8b10b14°b14y8y15*y15                                                | 2044.91 | 60.120  | 16047  | 3 | 682.31  | -12.834 |
| P02042 HBD_HUMAN Hemoglobin<br>subunit delta | 7  |                                                                         | FFESFGDLSSPDVVMGNPKVK                | 41  | 21 | 5  | 22.85  | b10b12b13y15°y15                                                     | 2272.09 | 65.925  | 622220 | 3 | 758.03  | -3.439  |
| P02042 HBD_HUMAN Hemoglobin<br>subunit delta | 8  | Carbamidomethyl+C(27)                                                   | VLGAFSDGLAHLDNLKGTFSQLS<br>ELHCDK    | 67  | 29 | 5  | 33.76  | b11y3y4y5y7                                                          | 3172.54 | 111.608 | 54658  | 4 | 793.89  | -11.004 |
| P02042 HBD_HUMAN Hemoglobin<br>subunit delta | 9  | Oxidation+M(10)                                                         | NFGKEFTPQMQAAYQK                     | 117 | 16 | 5  | 26.11  | b8*b8b10b11y6                                                        | 1903.90 | 54.607  | 3902   | 2 | 952.45  | -2.372  |
| P02042 HBD_HUMAN Hemoglobin<br>subunit delta | 10 |                                                                         | LHVDPENFR                            | 96  | 9  | 0  | 1.92   |                                                                      | 1109.53 | 47.070  | 2297   | 3 | 370.51  | -6.821  |
| P07996 TSP1_HUMAN Thrombospondin-<br>1       | 1  |                                                                         | FVFGTTPEDILR                         | 216 | 12 | 24 | 165.25 | b2b3b5b6°b6b7°b7b8b10°b10<br>b12y1y2y3y4y6°y6y7°y7y8y9y<br>10°y10y12 | 1394.72 | 82.733  | 320098 | 2 | 697.86  | -10.678 |
| P07996 TSP1_HUMAN Thrombospondin-<br>1       | 2  |                                                                         | TIVTTLQDSIR                          | 288 | 11 | 17 | 94.72  | b1°b1b2b5°b5y1y3y4°y4y5y6y<br>7*y7y8°y8y9y11                         | 1246.70 | 68.051  | 284584 | 2 | 623.85  | -1.567  |

|                                    |    |                                                                          |                              |      |    |    |        |                                                                                 |         |         |        |   |         |        |
|------------------------------------|----|--------------------------------------------------------------------------|------------------------------|------|----|----|--------|---------------------------------------------------------------------------------|---------|---------|--------|---|---------|--------|
| P07996 TSP1_HUMAN Thrombospondin-1 | 3  |                                                                          | FTGSQPFQGQVEHATANK           | 623  | 18 | 29 | 155.22 | b2°b2b3b5°b5b8b10b11y2y3y4°y4y5y6°y6*y6y7°y7*y7y9*y9y11°y11*y11y12y13*y13y16y18 | 1875.89 | 44.875  | 192522 | 3 | 625.97  | -6.572 |
| P07996 TSP1_HUMAN Thrombospondin-1 | 4  |                                                                          | MENAELDVPIQSVFTR             | 173  | 16 | 18 | 146.28 | b2b3b4b6°b6b7b9b14y1y3y4y5y6y8y10y11y12y16                                      | 1848.91 | 81.921  | 184993 | 2 | 924.96  | -3.169 |
| P07996 TSP1_HUMAN Thrombospondin-1 | 5  |                                                                          | GGVNDNFQGVLQNVVR             | 201  | 15 | 19 | 125.67 | b2b3b5b7b11b12y2y3*y3y4*y4y5y7y8*y8y9y10y15*y15                                 | 1616.81 | 66.356  | 164646 | 2 | 808.91  | 0.529  |
| P07996 TSP1_HUMAN Thrombospondin-1 | 6  |                                                                          | NALWHTGNTPGQVR               | 1077 | 14 | 9  | 68.25  | y4*y4y5y8y9*y9y10y11y14                                                         | 1550.77 | 45.408  | 161247 | 3 | 517.59  | -8.501 |
| P07996 TSP1_HUMAN Thrombospondin-1 | 7  |                                                                          | GTSQNDPNWVVR                 | 968  | 12 | 6  | 46.38  | b4y2y3y4y6y8                                                                    | 1372.66 | 47.554  | 130867 | 2 | 686.83  | 0.089  |
| P07996 TSP1_HUMAN Thrombospondin-1 | 8  |                                                                          | GDPSPSPAFR                   | 50   | 10 | 6  | 37.44  | b2b3y4y6y7y10                                                                   | 1030.49 | 36.283  | 120123 | 2 | 515.75  | -4.738 |
| P07996 TSP1_HUMAN Thrombospondin-1 | 9  | Carbamidomethyl+C(3)                                                     | DNCQYVYNVDQR                 | 810  | 12 | 8  | 55.53  | b3b9y1y2y3y6y7y9                                                                | 1573.68 | 44.035  | 118478 | 2 | 787.34  | 5.352  |
| P07996 TSP1_HUMAN Thrombospondin-1 | 10 |                                                                          | AQGYSGLSVK                   | 1054 | 10 | 6  | 39.76  | b2*b2y3y6y8y10                                                                  | 1009.53 | 39.133  | 118030 | 2 | 505.27  | -4.353 |
| P07996 TSP1_HUMAN Thrombospondin-1 | 11 | Carbamidomethyl+C(5)                                                     | RPPLCYHNGVQYR                | 313  | 13 | 3  | 18.95  | b4b6y5                                                                          | 1659.81 | 36.385  | 108925 | 3 | 553.94  | -5.222 |
| P07996 TSP1_HUMAN Thrombospondin-1 | 12 | Carbamidomethyl+C(2);<br>Carbamidomethyl+C(14)                           | LCNSPSPQMNGKPCEGEAR          | 460  | 19 | 26 | 203.93 | b2b3b4°b4b6b8y2y4y5y6y7y8y9y10°y10*y10y11y12*y12y13y15y16y17y18°y18y19          | 2131.93 | 31.498  | 102939 | 3 | 711.31  | -2.977 |
| P07996 TSP1_HUMAN Thrombospondin-1 | 13 | Carbamidomethyl+C(1)                                                     | CNYLGHYSDPMYR                | 662  | 13 | 5  | 18.95  | b9y1y4y7y13                                                                     | 1675.69 | 53.607  | 82434  | 3 | 559.23  | -7.503 |
| P07996 TSP1_HUMAN Thrombospondin-1 | 14 | Carbamidomethyl+C(11);<br>Carbamidomethyl+C(14)                          | DTDMDGVGDQDCNCPLEHNPDQLSDSDR | 822  | 29 | 6  | 23.57  | y3y5°y5y10y22y29                                                                | 3320.28 | 52.507  | 74335  | 3 | 1107.43 | 4.265  |
| P07996 TSP1_HUMAN Thrombospondin-1 | 15 | Carbamidomethyl+C(1)                                                     | CTSPYDGSWK                   | 561  | 10 | 4  | 34.99  | y6y7y8y10                                                                       | 1200.50 | 41.136  | 64545  | 2 | 600.75  | 2.339  |
| P07996 TSP1_HUMAN Thrombospondin-1 | 16 |                                                                          | GFLLASLR                     | 86   | 9  | 6  | 28.49  | b2b3y2y4y5y9                                                                    | 989.61  | 90.327  | 61918  | 2 | 495.31  | -7.524 |
| P07996 TSP1_HUMAN Thrombospondin-1 | 17 | Carbamidomethyl+C(1);<br>Carbamidomethyl+C(10);<br>Carbamidomethyl+C(13) | CENTDPGYNCLPCPPR             | 607  | 16 | 15 | 65.45  | b2b5b7b11y1y2y5y7y8*y8y11*y11y12°y12y16                                         | 1949.81 | 50.293  | 54928  | 2 | 975.41  | 9.955  |
| P07996 TSP1_HUMAN Thrombospondin-1 | 18 | Carbamidomethyl+C(6);<br>Carbamidomethyl+C(10)                           | DLQAICGISCDELSSMVLELR        | 264  | 21 | 17 | 69.24  | b4°b4b6°b6b7°b7b12y1y2y3°y3y6y8y12°y12y13y15                                    | 2409.17 | 102.342 | 45127  | 2 | 1205.09 | 8.817  |
| P07996 TSP1_HUMAN Thrombospondin-1 | 19 |                                                                          | IPESGGDNSVDFIFELTGAAR        | 20   | 21 | 7  | 27.14  | b3b16y1y4y6y7y21                                                                | 2195.08 | 99.754  | 44364  | 2 | 1098.05 | 10.344 |
| P07996 TSP1_HUMAN Thrombospondin-1 | 20 | Carbamidomethyl+C(2)                                                     | LCNNPTPQFGGK                 | 517  | 12 | 8  | 46.38  | b2b3y1y3y6y9y10y12                                                              | 1332.64 | 39.826  | 35468  | 2 | 666.83  | 5.313  |
| P07996 TSP1_HUMAN Thrombospondin-1 | 21 |                                                                          | GTLALER                      | 101  | 8  | 5  | 51.25  | y3y4y5y6y8                                                                      | 872.51  | 56.716  | 34497  | 2 | 436.76  | -8.045 |
| P07996 TSP1_HUMAN Thrombospondin-1 | 22 | Carbamidomethyl+C(6)                                                     | EVPDACFNHNGEHR               | 593  | 14 | 13 | 82.49  | b2°b2b9b10°b10b11y4°y4y6y7y10y12y14                                             | 1681.71 | 30.244  | 26133  | 3 | 561.24  | -4.500 |
| P07996 TSP1_HUMAN Thrombospondin-1 | 23 | Carbamidomethyl+C(2);<br>Carbamidomethyl+C(14);<br>Carbamidomethyl+C(24) | LCNNPTPQFGGKDCVGDVTENQICNK   | 517  | 26 | 7  | 19.7   | b2b4b9b12y3y11y26                                                               | 2965.32 | 52.735  | 17714  | 3 | 989.11  | -0.082 |
| P07996 TSP1_HUMAN Thrombospondin-1 | 24 |                                                                          | FYVVMWK                      | 1034 | 7  | 3  | 38.32  | b4y3y6                                                                          | 972.50  | 61.065  | 3493   | 2 | 486.75  | -4.393 |
| P07996 TSP1_HUMAN Thrombospondin-1 | 25 |                                                                          | IMADSGPIYDK                  | 1130 | 11 | 7  | 44.35  | b3b7y2y5°y5y6y9                                                                 | 1209.59 | 32.103  | 1985   | 2 | 605.30  | 4.743  |

|                                    |    |                                                                                                                              |                                               |      |    |    |        |                                                                        |         |         |        |   |         |         |
|------------------------------------|----|------------------------------------------------------------------------------------------------------------------------------|-----------------------------------------------|------|----|----|--------|------------------------------------------------------------------------|---------|---------|--------|---|---------|---------|
| P07996 TSP1_HUMAN Thrombospondin-1 | 26 | Carbamidomethyl+C(1);<br>Carbamidomethyl+C(4);<br>Carbamidomethyl+C(24)                                                      | CDNCPYHNHPDQADTDNNGEGD<br>ACAADIDGGDGLNER     | 773  | 37 | 4  | 20.73  | b3b4b11y6                                                              | 4092.60 | 57.579  | 17593  | 3 | 1364.87 | 2.028   |
| P07996 TSP1_HUMAN Thrombospondin-1 | 27 |                                                                                                                              | QVTQSYWDTNPTR                                 | 1041 | 13 | 3  | 18.95  | b8b11y12                                                               | 1595.75 | 73.700  | 9774   | 2 | 798.38  | 0.612   |
| P07996 TSP1_HUMAN Thrombospondin-1 | 28 | Carbamidomethyl+C(5);<br>Carbamidomethyl+C(23)                                                                               | IGDTCDDNNQDIDEDGHQNNLDNC<br>PYVPPANQADHDK     | 851  | 36 | 7  | 34.91  | b3b4°b4y3y5y10y11                                                      | 4125.67 | 46.281  | 7986   | 4 | 1032.17 | -1.420  |
| P07996 TSP1_HUMAN Thrombospondin-1 | 29 | Carbamidomethyl+C(7)                                                                                                         | AQLYIDCEK                                     | 164  | 9  | 6  | 70.62  | b7y3y4y5y6y7                                                           | 1139.54 | 43.207  | 7312   | 1 | 1139.54 | 1.500   |
| P07996 TSP1_HUMAN Thrombospondin-1 | 30 | Carbamidomethyl+C(3);<br>Carbamidomethyl+C(8);<br>Carbamidomethyl+C(13)                                                      | QDCPIDGCLSNPCFAGVK                            | 543  | 18 | 6  | 40.84  | b5y9y10y13*y13y14                                                      | 2037.85 | 66.679  | 4831   | 2 | 1019.43 | -17.192 |
| P07996 TSP1_HUMAN Thrombospondin-1 | 31 |                                                                                                                              | DHSGQVFSVVVNGK                                | 110  | 14 | 4  | 36.14  | b11b12b13y5                                                            | 1460.70 | 43.377  | 3709   | 3 | 487.57  | -8.524  |
| P07996 TSP1_HUMAN Thrombospondin-1 | 32 | Carbamidomethyl+C(16)                                                                                                        | MGLAWGLGVFLMHVCGTNR                           | 0    | 20 | 5  | 23.32  | b9y3y4y6°y6                                                            | 2232.14 | 84.799  | 1679   | 4 | 558.79  | 7.984   |
| P07996 TSP1_HUMAN Thrombospondin-1 | 33 |                                                                                                                              | TLWH DPR                                      | 1091 | 7  | 3  | 38.32  | y4y5y6                                                                 | 924.46  | 98.826  | 1646   | 1 | 924.46  | -14.063 |
| P07996 TSP1_HUMAN Thrombospondin-1 | 34 |                                                                                                                              | IEDANLIPPVDDKFDLVD AVR                        | 60   | 23 | 24 | 205.54 | b4b5*b5b6*b6b7*b7b13b14y3<br>y4y5y6y7°y7y9*y9y10y11y13y<br>14y15y16y17 | 2579.33 | 88.635  | 341207 | 3 | 860.45  | -3.218  |
| P07996 TSP1_HUMAN Thrombospondin-1 | 35 | Carbamidomethyl+C(21)                                                                                                        | FTGSQPFQGGVEHATANKQVCKP<br>R                  | 623  | 24 | 7  | 53.46  | y6y8y9y10y11*y11y19                                                    | 2644.28 | 41.234  | 71362  | 5 | 529.66  | -8.771  |
| P07996 TSP1_HUMAN Thrombospondin-1 | 36 | Carbamidomethyl+C(4);<br>Carbamidomethyl+C(16)                                                                               | IRLCNSPSPQMNGKPCGEAR                          | 458  | 21 | 18 | 136.35 | b4b5b6°b6*b6b8b10y4y5y6y7<br>y8°y8y9y10*y10y11y13                      | 2401.09 | 38.170  | 64204  | 4 | 601.03  | -12.303 |
| P07996 TSP1_HUMAN Thrombospondin-1 | 37 | Carbamidomethyl+C(1);<br>Carbamidomethyl+C(4);<br>Carbamidomethyl+C(15)<br>;Carbamidomethyl+C(21)<br>);Carbamidomethyl+C(28) | CGACPPGYSGNGIQCTDVDECKE<br>VPDACFNHNGEHR      | 571  | 36 | 3  | 22.56  | b3b4y12                                                                | 4107.62 | 49.628  | 42453  | 5 | 822.33  | -7.132  |
| P07996 TSP1_HUMAN Thrombospondin-1 | 38 |                                                                                                                              | VTEENKELANELR                                 | 300  | 13 | 5  | 18.95  | b3°b3b8*b8y4                                                           | 1544.78 | 41.753  | 38518  | 3 | 515.60  | -7.033  |
| P07996 TSP1_HUMAN Thrombospondin-1 | 39 |                                                                                                                              | GTSQNDPNWVVRHQGK                              | 968  | 16 | 4  | 15.7   | b4b10y4*y4                                                             | 1822.89 | 71.175  | 18837  | 2 | 911.95  | -2.813  |
| P07996 TSP1_HUMAN Thrombospondin-1 | 40 |                                                                                                                              | FYVVMWKQVTQSYWDTNPTR                          | 1034 | 20 | 6  | 23.32  | b15y7y8y11°y11*y11                                                     | 2549.24 | 121.441 | 15025  | 3 | 850.42  | 3.927   |
| P07996 TSP1_HUMAN Thrombospondin-1 | 41 | Carbamidomethyl+C(5);<br>Carbamidomethyl+C(23)                                                                               | IGDTCDDNNQDIDEDGHQNNLDNC<br>PYVPPANQADHDKDGGK | 851  | 39 | 8  | 34.87  | b4y7°y7y8y9y11°y11y13                                                  | 4425.80 | 44.149  | 6832   | 5 | 885.97  | -4.634  |
| P07996 TSP1_HUMAN Thrombospondin-1 | 42 | Carbamidomethyl+C(4);<br>Carbamidomethyl+C(19)<br>;Carbamidomethyl+C(23)<br>)                                                | KDACPINGGWGPSPWDICSVTC<br>GGGVQK              | 485  | 29 | 5  | 13.28  | b15b17y9y14°y14                                                        | 3189.44 | 92.511  | 3033   | 3 | 1063.82 | 3.062   |
| P07996 TSP1_HUMAN Thrombospondin-1 | 43 |                                                                                                                              | TYAGGRLGLFVFSQEMVFFSDLK                       | 1141 | 23 | 3  | 22.2   | b6b7b19                                                                | 2612.34 | 110.488 | 2643   | 2 | 1306.67 | 7.009   |
| P07996 TSP1_HUMAN Thrombospondin-1 | 44 | Carbamidomethyl+C(12)                                                                                                        | ELANELRRPPLCYHNGVQYR                          | 306  | 20 | 4  | 22.63  | y3*y3y9y10                                                             | 2485.22 | 121.469 | 2380   | 3 | 829.08  | -12.280 |
| P07996 TSP1_HUMAN Thrombospondin-1 | 45 | Carbamidomethyl+C(2);<br>Carbamidomethyl+C(7)                                                                                | TCHIQECDKR                                    | 421  | 10 | 15 | 122.16 | b3°b3b4b5y3y4y5°y5y6°y6*y6<br>y7*y7y8y9                                | 1346.58 | 21.002  | 2014   | 3 | 449.53  | -12.057 |
| P07996 TSP1_HUMAN Thrombospondin-1 | 46 | Phosphoryl STY(9)                                                                                                            | TIVTTLQDSIR                                   | 288  | 11 | 3  | 25.47  | b7b8y9                                                                 | 1326.67 | 60.842  | 6835   | 2 | 663.84  | 12.790  |

|                                                                          |    |                                            |                                     |      |    |    |        |                                                             |         |         |        |   |         |         |
|--------------------------------------------------------------------------|----|--------------------------------------------|-------------------------------------|------|----|----|--------|-------------------------------------------------------------|---------|---------|--------|---|---------|---------|
| [P07996]TSP1_HUMAN Thrombospondin-1                                      | 47 | Carbamidomethyl+C(8); Phosphoryl STY(12)   | IPDDRDNC PFHYNPAQYDYDRDD VGDR       | 746  | 27 | 3  | 11.28  | b11y7y14                                                    | 3408.33 | 101.629 | 5867   | 3 | 1136.78 | -8.023  |
| [P07996]TSP1_HUMAN Thrombospondin-1                                      | 48 | Phosphoryl STY(7)                          | AGTLDSLTVQGK                        | 124  | 13 | 6  | 49.02  | b4b5b11y6y7y9                                               | 1382.70 | 39.966  | 2220   | 3 | 461.57  | 10.153  |
| [P07996]TSP1_HUMAN Thrombospondin-1                                      | 49 | Carbamidomethyl+C(4)                       | PDACFNHNGEHR                        | 595  | 12 | 2  | 14.76  | b3b11                                                       | 1453.59 | 30.258  | 24664  | 3 | 485.20  | -8.398  |
| [P07996]TSP1_HUMAN Thrombospondin-1                                      | 50 |                                            | LWHTGNTPGQVR                        | 1079 | 12 | 0  | 4.32   |                                                             | 1365.70 | 45.428  | 7458   | 2 | 683.35  | -2.145  |
| [P07996]TSP1_HUMAN Thrombospondin-1                                      | 51 | Carbamidomethyl+C(2); Carbamidomethyl+C(5) | NCLPCPPR                            | 615  | 8  | 1  | 7.32   | b7                                                          | 1013.48 | 50.325  | 4455   | 2 | 507.24  | 13.852  |
| [P07996]TSP1_HUMAN Thrombospondin-1                                      | 52 | Carbamidomethyl+C(6)                       | EVPDACFNHNGEHR                      | 593  | 14 | 0  | 4.32   |                                                             | 1663.68 | 30.260  | 5444   | 3 | 555.23  | -9.759  |
| [P07996]TSP1_HUMAN Thrombospondin-1                                      | 53 |                                            | GTLLALER                            | 101  | 8  | 0  | 1.44   |                                                             | 854.50  | 56.722  | 3695   | 2 | 427.75  | -7.571  |
| [Q9H299]SH3L3_HUMAN SH3 domain-binding glutamic acid-rich-like protein 3 | 1  |                                            | IQYQLVDISQDNALR                     | 32   | 15 | 14 | 112.01 | b3b4*b4y4*y4y5y6*y6y7y8y10y11y13                            | 1775.92 | 70.355  | 79245  | 2 | 888.46  | -4.812  |
| [Q9H299]SH3L3_HUMAN SH3 domain-binding glutamic acid-rich-like protein 3 | 2  |                                            | VYSTSVTGSR                          | 5    | 10 | 7  | 52.21  | b2y2y4y6y8y9y10                                             | 1056.53 | 27.985  | 62822  | 2 | 528.77  | 1.964   |
| [Q9H299]SH3L3_HUMAN SH3 domain-binding glutamic acid-rich-like protein 3 | 3  | Carbamidomethyl+C(13)                      | ATPPQIVNGDQYCGDYELFVEAV EQNTLQEFLK  | 58   | 33 | 24 | 145.68 | b2*b2b5b6b7b8b9b11b13b15y1y2y3y4*y4y5*y5y6y8y9y10*y10y11y33 | 3815.83 | 117.480 | 46668  | 3 | 1272.61 | 3.839   |
| [Q9H299]SH3L3_HUMAN SH3 domain-binding glutamic acid-rich-like protein 3 | 4  |                                            | SGLR                                | 1    | 4  | 1  | 11.97  | b3                                                          | 432.26  | 62.027  | 8691   | 1 | 432.26  | 13.202  |
| [Q9H299]SH3L3_HUMAN SH3 domain-binding glutamic acid-rich-like protein 3 | 5  |                                            | VYSTSVTGSREIK                       | 5    | 13 | 3  | 26.43  | b5b6b10                                                     | 1426.76 | 55.129  | 74722  | 2 | 713.88  | 1.112   |
| [Q9H299]SH3L3_HUMAN SH3 domain-binding glutamic acid-rich-like protein 3 | 6  |                                            | EIKSQQSEVTR                         | 15   | 11 | 5  | 22.46  | b5°b5b9°b9y6                                                | 1304.67 | 46.870  | 3176   | 2 | 652.84  | -5.146  |
| [Q9H299]SH3L3_HUMAN SH3 domain-binding glutamic acid-rich-like protein 3 | 7  | Phosphoryl STY(7)                          | VYSTSVTGSREIK                       | 5    | 13 | 4  | 27.21  | b5b9_H3PO4 b9_HPO3 b9y7y12                                  | 1506.71 | 60.068  | 3840   | 3 | 502.91  | -1.620  |
| [Q9H299]SH3L3_HUMAN SH3 domain-binding glutamic acid-rich-like protein 3 | 8  | Phosphoryl STY(7)                          | VYSTSVTGSR                          | 5    | 10 | 4  | 26.75  | b5°b5b6y7_H3PO4 y7                                          | 1136.49 | 49.778  | 3220   | 1 | 1136.49 | -2.256  |
| [P24844]MYL9_HUMAN Myosin regulatory light polypeptide 9                 | 1  |                                            | LNGTDPEDVIR                         | 93   | 11 | 11 | 96.49  | b5*b5b7b10y1y3y4y6y8y9°y9                                   | 1228.62 | 48.795  | 104788 | 2 | 614.81  | -0.497  |
| [P24844]MYL9_HUMAN Myosin regulatory light polypeptide 9                 | 2  |                                            | ATSNVFAMFDQSQIQEFK                  | 17   | 18 | 10 | 28.14  | b2°b2b5b14°b14y2y4y10y12y18                                 | 2091.00 | 90.131  | 66351  | 2 | 1046.00 | 6.655   |
| [P24844]MYL9_HUMAN Myosin regulatory light polypeptide 9                 | 3  |                                            | ELLTTMGDR                           | 124  | 9  | 5  | 51.73  | y3y5y6y7y9                                                  | 1035.51 | 48.837  | 27690  | 2 | 518.26  | -0.943  |
| [P24844]MYL9_HUMAN Myosin regulatory light polypeptide 9                 | 4  |                                            | EAFNMIDQNR                          | 35   | 10 | 3  | 31.98  | y3y8y9                                                      | 1237.56 | 51.416  | 18305  | 2 | 619.29  | 1.578   |
| [P24844]MYL9_HUMAN Myosin regulatory light polypeptide 9                 | 5  |                                            | GNFNYYEFTR                          | 151  | 10 | 5  | 37.44  | b3b5b6y7*y7                                                 | 1246.57 | 40.575  | 65595  | 2 | 623.79  | -11.163 |
| [P24844]MYL9_HUMAN Myosin regulatory light polypeptide 9                 | 6  | Carbamidomethyl+C(5)                       | NAFACFDEEASGFHEDHLR                 | 104  | 20 | 4  | 34.09  | b3b4y12y13                                                  | 2364.99 | 81.135  | 28149  | 4 | 592.00  | -18.891 |
| [P24844]MYL9_HUMAN Myosin regulatory light polypeptide 9                 | 7  |                                            | ELLTTMGDRFTDEEVDEMYR                | 124  | 20 | 3  | 13.21  | b7y3y5                                                      | 2450.09 | 76.372  | 18190  | 3 | 817.37  | 3.687   |
| [P24844]MYL9_HUMAN Myosin regulatory light polypeptide 9                 | 8  |                                            | FTDEEVDEMYREAPIDK                   | 133  | 17 | 4  | 14.93  | b3°b3b10y9                                                  | 2086.90 | 42.642  | 4746   | 3 | 696.31  | -11.114 |
| [P24844]MYL9_HUMAN Myosin regulatory light polypeptide 9                 | 9  | Oxidation+M(O)                             | ATSNVFAMFDQSQIQEFKEAFNMI DQNRDGFIDK | 17   | 34 | 4  | 10.89  | b9°b9y5y12                                                  | 4000.84 | 47.874  | 2857   | 5 | 800.97  | -3.051  |



|                                                          |    |                                                                    |                                  |     |    |    |        |                                                       |         |         |        |   |         |         |
|----------------------------------------------------------|----|--------------------------------------------------------------------|----------------------------------|-----|----|----|--------|-------------------------------------------------------|---------|---------|--------|---|---------|---------|
| [P24844]MYL9_HUMAN Myosin regulatory light polypeptide 9 | 10 | Oxidation+M(9)                                                     | FTDEEVDEMYR                      | 133 | 11 | 5  | 32.69  | b6b8y4y7*y7                                           | 1449.57 | 25.545  | 1616   | 2 | 725.29  | -6.232  |
| [P02679]FIBG_HUMAN Fibrinogen gamma chain                | 1  |                                                                    | AIQLTYNPDESSKPNMIDAATLK          | 88  | 23 | 20 | 157.17 | b1b2b3b4b5y2y3y6y10*y10y11y12y13y16y17y18y19y20y21y23 | 2520.27 | 66.539  | 411802 | 3 | 840.76  | 0.097   |
| [P02679]FIBG_HUMAN Fibrinogen gamma chain                | 2  |                                                                    | EGFGHLSPTGTTEFWLGNEK             | 238 | 20 | 11 | 55.32  | b3b6b7b8*b8b15b20y4y6y8y20                            | 2207.04 | 77.112  | 287967 | 3 | 736.35  | 1.217   |
| [P02679]FIBG_HUMAN Fibrinogen gamma chain                | 3  |                                                                    | YEASILTHDSSIR                    | 121 | 13 | 15 | 127.6  | b2b3b11*b11y3y4y5*y5y6y7y8y9y10y11y13                 | 1491.72 | 49.258  | 237146 | 3 | 497.91  | -13.993 |
| [P02679]FIBG_HUMAN Fibrinogen gamma chain                | 4  | Carbamidomethyl+C(8); Carbamidomethyl+C(12)                        | VAQLEAQCQEPCKDTVQIHDITGK         | 153 | 24 | 14 | 75.83  | b2b5b12y2y3y5y6y7y8y14y19y22*y22y24                   | 2768.32 | 50.717  | 126338 | 4 | 692.84  | -5.115  |
| [P02679]FIBG_HUMAN Fibrinogen gamma chain                | 5  | Carbamidomethyl+C(8); Carbamidomethyl+C(12); Carbamidomethyl+C(26) | VAQLEAQCQEPCKDTVQIHDITGKDCQDIANK | 153 | 32 | 16 | 92.58  | b2b3b5b16y2y3y4y5y8y11y12y13y14y28y29y32              | 3712.70 | 49.935  | 125532 | 5 | 743.35  | -10.719 |
| [P02679]FIBG_HUMAN Fibrinogen gamma chain                | 6  |                                                                    | YLQEIYNSNNQK                     | 134 | 12 | 12 | 105.44 | b2b3b4b5y2y4y6y7y8y9y10y12                            | 1513.73 | 44.462  | 122335 | 2 | 757.37  | 3.629   |
| [P02679]FIBG_HUMAN Fibrinogen gamma chain                | 7  |                                                                    | ASTPNGYDNGIHWATWK                | 382 | 17 | 6  | 47.69  | b4y3y4y5y6y17                                         | 1893.92 | 81.019  | 117488 | 2 | 947.46  | 2.643   |
| [P02679]FIBG_HUMAN Fibrinogen gamma chain                | 8  | Carbamidomethyl+C(5); Carbamidomethyl+C(9)                         | FGSYCPTTCGIADFLSTYQTK            | 40  | 21 | 16 | 112.41 | b2b3y2y3*y3y4y5y6y7y8y9*y9y10y12y16y21                | 2417.10 | 88.698  | 108320 | 2 | 1209.05 | 7.374   |
| [P02679]FIBG_HUMAN Fibrinogen gamma chain                | 9  |                                                                    | IHLISTQSAIPYALR                  | 258 | 15 | 10 | 64.65  | b2b3b4y2y3y4y5y11y13y15                               | 1682.94 | 70.585  | 98574  | 3 | 561.65  | -11.968 |
| [P02679]FIBG_HUMAN Fibrinogen gamma chain                | 10 |                                                                    | LDGSVDFK                         | 223 | 8  | 5  | 34.03  | b2b3*b3b6y7                                           | 880.45  | 47.334  | 37111  | 2 | 440.73  | 9.081   |
| [P02679]FIBG_HUMAN Fibrinogen gamma chain                | 11 |                                                                    | FFTSHNGMQFSTWDNDNDK              | 328 | 19 | 5  | 18.69  | b6b12y3y12y19                                         | 2290.94 | 54.652  | 32282  | 3 | 764.32  | -0.639  |
| [P02679]FIBG_HUMAN Fibrinogen gamma chain                | 12 |                                                                    | LDGSVDFKK                        | 223 | 9  | 6  | 58.17  | b3b4b5b7y1y4                                          | 1008.53 | 34.186  | 17475  | 2 | 504.77  | -2.481  |
| [P02679]FIBG_HUMAN Fibrinogen gamma chain                | 13 | Carbamidomethyl+C(5)                                               | FEGNCAEQDGSWWMNK                 | 347 | 17 | 3  | 23.58  | y5y6y9                                                | 2015.78 | 43.266  | 2035   | 2 | 1008.39 | -10.961 |
| [P02679]FIBG_HUMAN Fibrinogen gamma chain                | 14 | Carbamidomethyl+C(9)                                               | ANQQFLVYCEIDGSGNGWTVFQK          | 199 | 23 | 4  | 12.12  | b1b5b13y11                                            | 2661.26 | 93.055  | 1984   | 3 | 887.76  | 6.147   |
| [P02679]FIBG_HUMAN Fibrinogen gamma chain                | 15 |                                                                    | QSGLYFIKPLK                      | 188 | 11 | 3  | 34.22  | y3y4y5                                                | 1293.73 | 65.218  | 82822  | 3 | 431.92  | -17.833 |
| [P02679]FIBG_HUMAN Fibrinogen gamma chain                | 16 | Carbamidomethyl+C(8); Carbamidomethyl+C(12)                        | VAQLEAQCQEPCK                    | 153 | 13 | 3  | 23.72  | b3y4y5                                                | 1560.73 | 91.272  | 33545  | 3 | 520.92  | 12.593  |
| [P02679]FIBG_HUMAN Fibrinogen gamma chain                | 17 |                                                                    | QVRPEHPAETEYDSLYPEDDL            | 432 | 21 | 11 | 63.02  | b5b9*b9b10*b10b11b13y4y9y15y20                        | 2503.11 | 92.572  | 24989  | 4 | 626.53  | -4.682  |
| [P02679]FIBG_HUMAN Fibrinogen gamma chain                | 18 |                                                                    | DLQSLEDILHQVENK                  | 64  | 15 | 4  | 16.6   | b9b11*b11y11                                          | 1780.91 | 106.457 | 24773  | 2 | 890.96  | -1.028  |
| [P02679]FIBG_HUMAN Fibrinogen gamma chain                | 19 |                                                                    | NWIQYK                           | 232 | 6  | 2  | 12.93  | b3*b3                                                 | 851.44  | 41.741  | 17561  | 1 | 851.44  | 1.147   |
| [P02679]FIBG_HUMAN Fibrinogen gamma chain                | 20 | Carbamidomethyl+C(3); Carbamidomethyl+C(4)                         | DNCCILDER                        | 31  | 9  | 8  | 70.62  | b3*b3*b3y3y4y5y6y7                                    | 1194.49 | 44.496  | 9392   | 1 | 1194.49 | 5.212   |
| [P02679]FIBG_HUMAN Fibrinogen gamma chain                | 21 |                                                                    | NWIQYKEGFGHLSPTGTTEFWLGNEK       | 232 | 26 | 7  | 33.89  | b6y10*y10*y10y11y12*y12                               | 3039.47 | 118.257 | 120284 | 3 | 1013.83 | 1.847   |
| [P02679]FIBG_HUMAN Fibrinogen gamma chain                | 22 |                                                                    | VGPEADKYR                        | 292 | 9  | 5  | 42.7   | b8y4y7*y7y8                                           | 1034.53 | 23.529  | 30428  | 2 | 517.77  | 2.832   |
| [P02679]FIBG_HUMAN Fibrinogen gamma chain                | 23 |                                                                    | RLDGSVDFK                        | 222 | 9  | 3  | 28.49  | b8y3y8                                                | 1036.55 | 98.787  | 17472  | 2 | 518.78  | 12.012  |
| [P02679]FIBG_HUMAN Fibrinogen gamma chain                | 24 |                                                                    | ASTPNGYDNGIHWATWKTR              | 382 | 19 | 6  | 13.7   | b6*b6b13*b13*b13y4                                    | 2151.07 | 108.184 | 10742  | 3 | 717.70  | 4.653   |
| [P02679]FIBG_HUMAN Fibrinogen gamma chain                | 25 | Carbamidomethyl+C(9)                                               | ANQQFLVYCEIDGSGNGWTVFQKR         | 199 | 24 | 3  | 21.14  | b11b12y13                                             | 2817.35 | 83.194  | 10063  | 3 | 939.79  | 3.813   |

|                                           |    |                                             |                                |     |    |    |        |                                                                                                |         |         |        |   |         |         |
|-------------------------------------------|----|---------------------------------------------|--------------------------------|-----|----|----|--------|------------------------------------------------------------------------------------------------|---------|---------|--------|---|---------|---------|
| P02679 FIBG_HUMAN Fibrinogen gamma chain  | 26 |                                             | YRLTYAYFAGGDAGDAFDGDFDG DDPSDK | 299 | 29 | 3  | 21.47  | b8b9y5                                                                                         | 3153.38 | 122.232 | 4658   | 4 | 789.10  | 14.323  |
| P02679 FIBG_HUMAN Fibrinogen gamma chain  | 27 | Phosphoryl STY(15)                          | ASTPNGYDNGIHWATWK              | 382 | 17 | 6  | 29.83  | b4b13_H3PO4 b13y3°y3y7y9                                                                       | 1973.85 | 84.533  | 27952  | 3 | 658.62  | -9.709  |
| P02679 FIBG_HUMAN Fibrinogen gamma chain  | 28 | Oxidation+M(16)                             | AIQLTYNPDESSKPNMIDAATLK        | 88  | 23 | 8  | 37.8   | b12y8y12y16*y16y18°y18y22                                                                      | 2536.24 | 99.891  | 107596 | 3 | 846.08  | -9.530  |
| P02679 FIBG_HUMAN Fibrinogen gamma chain  | 29 |                                             | DGSVDFKK                       | 224 | 8  | 0  | 1.92   |                                                                                                | 895.46  | 34.194  | 14859  | 2 | 448.23  | 6.884   |
| P02679 FIBG_HUMAN Fibrinogen gamma chain  | 30 |                                             | ASILTHDSSIR                    | 123 | 11 | 5  | 26.43  | b3°b3b4b7°b7                                                                                   | 1199.63 | 49.272  | 5553   | 2 | 600.32  | -10.379 |
| P02679 FIBG_HUMAN Fibrinogen gamma chain  | 31 |                                             | YLQEIYNSNNQK                   | 134 | 12 | 0  | 3.36   |                                                                                                | 1496.68 | 44.440  | 1677   | 3 | 499.57  | -9.787  |
| P08567 PLEK_HUMAN Pleckstrin              | 1  |                                             | EDPAYLHYYPAGAEDPLGAIHLR        | 269 | 24 | 27 | 166.92 | b2°b2b4°b4b5°b5b7°b7b8b10° b10b12b13y1y2y3y4y5y6y7y8 y10y12y13y14y22y24                        | 2683.24 | 79.491  | 367275 | 4 | 671.57  | -13.375 |
| P08567 PLEK_HUMAN Pleckstrin              | 2  |                                             | SEEENLFEIITADEVHYFLQAATPK      | 308 | 25 | 35 | 245.58 | b1b2°b2b3°b3b4b5°b5°b5b6°b6°b6b7b9y2y3y4°y4y7y8y10y12y13*y13y14y15y16y17y18y19*y19y20y21y23y25 | 2894.40 | 121.987 | 296995 | 3 | 965.47  | -2.868  |
| P08567 PLEK_HUMAN Pleckstrin              | 3  |                                             | QEGLMIASSLLNEGYLQPAGDMSK       | 174 | 24 | 17 | 64.93  | b4°b4b5°b5°b5b6°b6b8b15y1 y2y3y7y10y11y15y24                                                   | 2552.23 | 91.401  | 77475  | 3 | 851.41  | -3.635  |
| P08567 PLEK_HUMAN Pleckstrin              | 4  | Carbamidomethyl+C(5); Carbamidomethyl+C(10) | IFNHCFGTGNCVIDWLVSNQSVR        | 150 | 22 | 13 | 53.57  | b5b10b12b15y1y2y5°y5*y5y6*y6y7y22                                                              | 2666.26 | 93.088  | 36312  | 3 | 889.43  | 0.458   |
| P08567 PLEK_HUMAN Pleckstrin              | 5  | Carbamidomethyl+C(8)                        | GSTLTSPCQDFGKR                 | 51  | 14 | 5  | 39.36  | y4y7y8y9y14                                                                                    | 1553.74 | 41.551  | 30248  | 2 | 777.38  | 3.221   |
| P08567 PLEK_HUMAN Pleckstrin              | 6  | Carbamidomethyl+C(2)                        | GCVVTSVESNSNGRK                | 293 | 15 | 11 | 72.53  | b2y7y8°y8*y8y9y10*y10y11y12y15                                                                 | 1593.75 | 29.562  | 18015  | 3 | 531.92  | -11.642 |
| P08567 PLEK_HUMAN Pleckstrin              | 7  |                                             | LPETIDL GALYLSMK               | 119 | 15 | 6  | 43.75  | b6b14y3y4y8y10                                                                                 | 1663.90 | 95.441  | 18534  | 2 | 832.45  | -1.394  |
| P08567 PLEK_HUMAN Pleckstrin              | 8  |                                             | AIQMASR                        | 340 | 7  | 7  | 63.23  | b3b4°b4y3y5y6°y6                                                                               | 776.41  | 116.290 | 5074   | 1 | 776.41  | 0.865   |
| P08567 PLEK_HUMAN Pleckstrin              | 9  |                                             | MFVFK                          | 65  | 5  | 1  | 12.45  | y4                                                                                             | 671.36  | 60.075  | 4330   | 1 | 671.36  | -2.727  |
| P08567 PLEK_HUMAN Pleckstrin              | 10 |                                             | ELNLEK                         | 141 | 6  | 1  | 12.93  | y4                                                                                             | 745.41  | 22.649  | 2773   | 2 | 373.21  | 5.814   |
| P08567 PLEK_HUMAN Pleckstrin              | 11 | Carbamidomethyl+C(2)                        | GCVVTSVESNSNGR                 | 293 | 14 | 7  | 47.37  | b4b5b9y5°y5y7y13                                                                               | 1465.68 | 71.827  | 2747   | 3 | 489.23  | 6.080   |
| P08567 PLEK_HUMAN Pleckstrin              | 12 |                                             | KSEEENLFEIITADEVHYFLQAATPK     | 307 | 26 | 3  | 22.1   | b3b7b8                                                                                         | 3022.51 | 116.158 | 31031  | 3 | 1008.17 | 0.323   |
| P08567 PLEK_HUMAN Pleckstrin              | 13 |                                             | LPETIDL GALYLSMKDTEK           | 119 | 19 | 4  | 23.87  | b3y5y6y8                                                                                       | 2137.10 | 88.539  | 17944  | 3 | 713.04  | -5.484  |
| P08567 PLEK_HUMAN Pleckstrin              | 14 | Carbamidomethyl+C(14)                       | GMIPLKGSTLTSPCQDFGK            | 45  | 19 | 5  | 22.88  | y11°y11y12°y12y14                                                                              | 2037.00 | 103.532 | 9958   | 2 | 1019.00 | -6.951  |
| P08567 PLEK_HUMAN Pleckstrin              | 15 |                                             | NRQEGLMIASSLLNEGYLQPAGDMSK     | 172 | 26 | 7  | 39.25  | y8y9y10°y10y12°y12y15                                                                          | 2822.35 | 83.946  | 6620   | 4 | 706.34  | -9.602  |
| P08567 PLEK_HUMAN Pleckstrin              | 16 |                                             | ITTTKQQDHFFQAAFLEER            | 70  | 19 | 3  | 21.48  | b12b13y13                                                                                      | 2310.14 | 99.781  | 3640   | 3 | 770.72  | -5.707  |
| P08567 PLEK_HUMAN Pleckstrin              | 17 | Oxidation+M(5)                              | QEGLMIASSLLNEGYLQPAGDMSK       | 174 | 24 | 9  | 48.15  | b4b5°b5b15°b15y7y10y11y12                                                                      | 2568.19 | 99.843  | 33160  | 3 | 856.74  | -14.544 |
| P08567 PLEK_HUMAN Pleckstrin              | 18 | Oxidation+M(14)                             | LPETIDL GALYLSMK               | 119 | 15 | 3  | 16.6   | b4y3y7                                                                                         | 1679.90 | 97.059  | 2085   | 2 | 840.45  | 2.979   |
| P08567 PLEK_HUMAN Pleckstrin              | 19 | Carbamidomethyl+C(4)                        | TSPCQDFGKR                     | 55  | 10 | 1  | 7.23   | b9                                                                                             | 1195.57 | 41.523  | 3482   | 2 | 598.29  | 12.865  |
| P08567 PLEK_HUMAN Pleckstrin              | 20 | Carbamidomethyl+C(6)                        | TLTSPCQDFGKR                   | 53  | 12 | 0  | 4.32   |                                                                                                | 1409.71 | 41.495  | 1966   | 2 | 705.36  | 14.721  |
| P08567 PLEK_HUMAN Pleckstrin              | 21 |                                             | EDPAYLHYYPAGAEDPLGAIHLR        | 269 | 24 | 0  | 9.12   |                                                                                                | 2665.24 | 79.472  | 15456  | 4 | 667.07  | -8.611  |
| P08567 PLEK_HUMAN Pleckstrin              | 22 | Carbamidomethyl+C(8)                        | GSTLTSPCQDFGKR                 | 51  | 14 | 0  | 4.32   |                                                                                                | 1535.72 | 41.545  | 12317  | 3 | 512.58  | -0.556  |
| P02775 CXCL7_HUMAN Platelet basic protein | 1  | Carbamidomethyl+C(2)                        | ICLDPDAPR                      | 103 | 9  | 14 | 84.32  | b2b3b4y1y2y3y5°y5y6°y6y7°y7y8y9                                                                | 1056.51 | 46.866  | 602681 | 2 | 528.76  | -4.044  |

|                                           |    |                       |                                          |     |    |    |        |                                                              |         |         |        |   |         |         |
|-------------------------------------------|----|-----------------------|------------------------------------------|-----|----|----|--------|--------------------------------------------------------------|---------|---------|--------|---|---------|---------|
| P02775 CXCL7_HUMAN Platelet basic protein | 2  |                       | GKEESLDSLYAELR                           | 47  | 15 | 21 | 158.35 | b2b3°b3b4b7b9b10y1y2y3°y3y4y5y6y7°y7y8y9y10y11y15            | 1724.81 | 64.586  | 481253 | 3 | 575.61  | -12.031 |
| P02775 CXCL7_HUMAN Platelet basic protein | 3  | Carbamidomethyl+C(4)  | GTHCNQVEVIATLK                           | 85  | 14 | 12 | 102.83 | b3b4b5b6b9y3y5y7°y7y10y11y14                                 | 1569.78 | 51.535  | 185138 | 3 | 523.93  | -13.997 |
| P02775 CXCL7_HUMAN Platelet basic protein | 4  |                       | EESLDSLYAELR                             | 49  | 13 | 7  | 26.43  | b2b13y2y4y9y10y13                                            | 1539.73 | 71.072  | 39952  | 2 | 770.37  | 9.514   |
| P02775 CXCL7_HUMAN Platelet basic protein | 5  | Carbamidomethyl+C(3)  | KICLDPDAPR                               | 102 | 10 | 5  | 56.88  | b5b7y3y5y8                                                   | 1184.61 | 41.539  | 86085  | 2 | 592.81  | 0.000   |
| P02775 CXCL7_HUMAN Platelet basic protein | 6  |                       | GKEESLDSLYAELR                           | 47  | 15 | 10 | 58.26  | b7°b7b10°b10b11y7y9y10°y10y11                                | 1724.83 | 62.793  | 3438   | 3 | 575.62  | -1.557  |
| P02775 CXCL7_HUMAN Platelet basic protein | 7  |                       | LDPDAPR                                  | 105 | 7  | 3  | 36.27  | b3b4b5                                                       | 783.40  | 46.874  | 8455   | 1 | 783.40  | 2.493   |
| P12814 ACTN1_HUMAN Alpha-actinin-1        | 1  |                       | VGWEQLLTIAR                              | 714 | 12 | 22 | 142.01 | b2b3b5°b5b6°b6°b6b8y1y2y3y4y5y6°y6y7y8°y8y9y1y12             | 1386.77 | 97.916  | 209566 | 2 | 693.89  | -2.993  |
| P12814 ACTN1_HUMAN Alpha-actinin-1        | 2  |                       | AIMTYVSSFYHAFSGAQK                       | 236 | 18 | 23 | 132.16 | b2b3b5°b5b11y1y2*y2y4*y4y5y6y7y8°y8y9y11y12°y12y13y16°y16y18 | 2007.95 | 90.418  | 148514 | 3 | 669.99  | -9.058  |
| P12814 ACTN1_HUMAN Alpha-actinin-1        | 3  |                       | VEQIAAIAQELNELDYDPSVNA<br>R              | 450 | 25 | 24 | 158.69 | b2°b2b3b4b5b6°b6b7b13y2y3*y3y5y6°y6y7y8y9y10y11°y11y12y15y25 | 2808.40 | 94.516  | 130871 | 3 | 936.80  | 9.476   |
| P12814 ACTN1_HUMAN Alpha-actinin-1        | 4  |                       | MLDAEDIVGTARPDEK                         | 220 | 16 | 12 | 61.25  | b2b14y3y4°y4y5y11°y11y12°y12y14y16                           | 1759.84 | 60.177  | 117324 | 3 | 587.28  | -8.185  |
| P12814 ACTN1_HUMAN Alpha-actinin-1        | 5  |                       | TINEVENQILTR                             | 726 | 12 | 10 | 66.73  | b3b9b10°b10y1y3y4y6y10y12                                    | 1429.77 | 59.895  | 110286 | 2 | 715.39  | 0.854   |
| P12814 ACTN1_HUMAN Alpha-actinin-1        | 6  | Carbamidomethyl+C(2)  | ICDQWDLNLTGALTQK                         | 478 | 14 | 11 | 52.81  | b4b11°b11y2y3y6°y6y9y12°y12y14                               | 1661.79 | 70.021  | 96406  | 2 | 831.40  | -2.204  |
| P12814 ACTN1_HUMAN Alpha-actinin-1        | 7  |                       | LASDLLEWIR                               | 281 | 10 | 5  | 24.99  | b8y2y3y8y10                                                  | 1215.67 | 92.047  | 92033  | 2 | 608.34  | -3.414  |
| P12814 ACTN1_HUMAN Alpha-actinin-1        | 8  |                       | AAPFNWMEGAMEDLQDTFIVH<br>TIEIQGLTTAHEQFK | 517 | 38 | 19 | 85.07  | b2b4b6b8b9°b9y2y4*y4y5y6y7y8*y8y10y11y26y36y38               | 4362.03 | 136.199 | 86741  | 4 | 1091.26 | -3.582  |
| P12814 ACTN1_HUMAN Alpha-actinin-1        | 9  |                       | LLETIDQLYLEYAKR                          | 502 | 15 | 7  | 49.29  | y1y4y5y6y8y13y15                                             | 1868.00 | 85.826  | 84737  | 3 | 623.34  | -10.325 |
| P12814 ACTN1_HUMAN Alpha-actinin-1        | 10 |                       | IDQLEGDHQLIQEALIFDNK                     | 684 | 20 | 8  | 49.75  | b11y1y3y4y5y6y9y20                                           | 2339.18 | 82.103  | 79529  | 3 | 780.40  | -2.922  |
| P12814 ACTN1_HUMAN Alpha-actinin-1        | 11 | Carbamidomethyl+C(11) | MVSDINNAWGCLQVEK                         | 359 | 17 | 12 | 79.82  | b9°b9y2y4y7y8y9y10y11y12*y12y17                              | 1992.93 | 76.355  | 77029  | 2 | 996.97  | 5.084   |
| P12814 ACTN1_HUMAN Alpha-actinin-1        | 12 |                       | LLETIDQLYLEYAK                           | 502 | 14 | 13 | 71.16  | b2b4°b4y1y2y3y4y5y6°y6y10y11y14                              | 1711.92 | 91.300  | 76723  | 2 | 856.46  | 3.138   |
| P12814 ACTN1_HUMAN Alpha-actinin-1        | 13 |                       | LSNRPAFMPSEGR                            | 346 | 13 | 7  | 42.88  | b4b7b8y2y4y5y13                                              | 1461.72 | 45.254  | 70130  | 3 | 487.91  | -6.347  |
| P12814 ACTN1_HUMAN Alpha-actinin-1        | 14 |                       | QFGAQANVIGPWQTK                          | 633 | 16 | 7  | 25.44  | b4b7°b7b12b16y7y16                                           | 1757.93 | 76.150  | 65802  | 2 | 879.47  | -3.333  |
| P12814 ACTN1_HUMAN Alpha-actinin-1        | 15 |                       | IVQTYHVNMAGTNPYTTITPQEIN<br>GK           | 577 | 26 | 7  | 25.24  | b13y3y7y8*y8y13y26                                           | 2890.44 | 64.295  | 44430  | 3 | 964.15  | -0.253  |
| P12814 ACTN1_HUMAN Alpha-actinin-1        | 16 |                       | KDDPLTNLNTAFDVAEK                        | 197 | 17 | 5  | 29.83  | b4b10y5y9y14                                                 | 1890.93 | 72.932  | 40014  | 3 | 630.98  | -5.358  |
| P12814 ACTN1_HUMAN Alpha-actinin-1        | 17 | Carbamidomethyl+C(1)  | CQLEINFNTLQTK                            | 331 | 13 | 9  | 38.11  | b2°b2b3b4b11y1y9y11y13                                       | 1608.81 | 70.243  | 39108  | 2 | 804.91  | 4.856   |
| P12814 ACTN1_HUMAN Alpha-actinin-1        | 18 |                       | ATLPDADKER                               | 555 | 10 | 9  | 64.67  | b2y1y2y3y4y5y6y7y10                                          | 1115.57 | 25.931  | 27518  | 2 | 558.29  | 1.313   |
| P12814 ACTN1_HUMAN Alpha-actinin-1        | 19 |                       | ASIHEAWTDGKEAMLR                         | 402 | 16 | 3  | 15.7   | b11b13y10                                                    | 1814.86 | 47.411  | 19487  | 3 | 605.63  | -11.972 |
| P12814 ACTN1_HUMAN Alpha-actinin-1        | 20 | Carbamidomethyl+C(2)  | ACLISLGYDIGNDPQGEAEFAR                   | 772 | 22 | 5  | 19.09  | b5b11°y6y11y21                                               | 2396.09 | 68.830  | 19118  | 3 | 799.37  | -11.208 |
| P12814 ACTN1_HUMAN Alpha-actinin-1        | 21 |                       | VLAVNQENEQLMEDYEK                        | 264 | 17 | 4  | 14.93  | b2b4y4y6                                                     | 2051.96 | 61.533  | 9946   | 3 | 684.66  | 0.595   |

|                                    |    |                       |                                     |     |    |    |       |                                             |         |         |         |   |        |         |
|------------------------------------|----|-----------------------|-------------------------------------|-----|----|----|-------|---------------------------------------------|---------|---------|---------|---|--------|---------|
| P12814 ACTN1_HUMAN Alpha-actinin-1 | 22 |                       | HTNYTMEHIR                          | 704 | 10 | 3  | 24.99 | b4b9y9                                      | 1301.60 | 31.969  | 4043    | 3 | 434.54 | -3.189  |
| P12814 ACTN1_HUMAN Alpha-actinin-1 | 23 |                       | FAIQDISVEETSAK                      | 133 | 14 | 8  | 29.15 | b2b5°b5b9°b9b12y5°y5                        | 1537.78 | 74.458  | 3444    | 2 | 769.39 | 4.445   |
| P12814 ACTN1_HUMAN Alpha-actinin-1 | 24 |                       | NYITMDELRR                          | 840 | 10 | 3  | 24.99 | b7y6y9                                      | 1310.64 | 60.483  | 3133    | 2 | 655.82 | -10.525 |
| P12814 ACTN1_HUMAN Alpha-actinin-1 | 25 | Carbamidomethyl+C(10) | ELPPDQAEYCIAR                       | 850 | 13 | 5  | 31.98 | b6b8°b8y5y6                                 | 1561.75 | 34.888  | 2678    | 2 | 781.38 | 9.849   |
| P12814 ACTN1_HUMAN Alpha-actinin-1 | 26 |                       | LAILGIHNEVSK                        | 565 | 12 | 3  | 20.51 | b3y6y9                                      | 1293.73 | 58.202  | 101515  | 3 | 431.92 | -17.172 |
| P12814 ACTN1_HUMAN Alpha-actinin-1 | 27 |                       | ALDFIASK                            | 95  | 8  | 3  | 31.02 | b5y5y6                                      | 864.48  | 55.286  | 60319   | 2 | 432.74 | -7.696  |
| P12814 ACTN1_HUMAN Alpha-actinin-1 | 28 |                       | YLDIPK                              | 214 | 6  | 2  | 25.39 | b3y4                                        | 748.41  | 48.903  | 29892   | 2 | 374.71 | -14.108 |
| P12814 ACTN1_HUMAN Alpha-actinin-1 | 29 |                       | HEAFESDLAAHQDR                      | 436 | 14 | 10 | 35.88 | b4°b4b8y4°y4*y4y9*y9y10*y10                 | 1625.71 | 36.612  | 22238   | 3 | 542.58 | -10.062 |
| P12814 ACTN1_HUMAN Alpha-actinin-1 | 30 |                       | TAPYK                               | 157 | 5  | 2  | 24.91 | b4y4                                        | 579.31  | 59.514  | 20685   | 1 | 579.31 | 1.475   |
| P12814 ACTN1_HUMAN Alpha-actinin-1 | 31 |                       | GISQEQMNEFR                         | 741 | 11 | 6  | 38.89 | b5°b5y3°y3y5y9                              | 1338.63 | 47.975  | 12464   | 2 | 669.82 | 16.871  |
| P12814 ACTN1_HUMAN Alpha-actinin-1 | 32 | Carbamidomethyl+C(6)  | DGLGFCALIHR                         | 174 | 11 | 3  | 25.47 | b4b5y4                                      | 1258.62 | 70.638  | 11684   | 3 | 420.21 | -12.996 |
| P12814 ACTN1_HUMAN Alpha-actinin-1 | 33 |                       | QQHNER                              | 624 | 6  | 5  | 37.84 | b4y4*y4y5*y5                                | 811.38  | 42.689  | 10433   | 1 | 811.38 | -6.093  |
| P12814 ACTN1_HUMAN Alpha-actinin-1 | 34 |                       | DQALTEEHR                           | 614 | 10 | 8  | 40.45 | b3°b3*b3y6°y6y7°y7y8                        | 1169.54 | 21.044  | 6772    | 3 | 390.52 | -15.134 |
| P12814 ACTN1_HUMAN Alpha-actinin-1 | 35 |                       | LEDFR                               | 312 | 5  | 2  | 24.91 | y3y4                                        | 679.35  | 32.598  | 5249    | 1 | 679.35 | 11.410  |
| P12814 ACTN1_HUMAN Alpha-actinin-1 | 36 |                       | EAMLR                               | 413 | 5  | 1  | 12.45 | b4                                          | 619.32  | 44.181  | 4679    | 1 | 619.32 | -0.099  |
| P12814 ACTN1_HUMAN Alpha-actinin-1 | 37 |                       | ISIEMHGTLEDQLSHLR                   | 655 | 17 | 6  | 20.77 | b5b13y3y10°y10*y10                          | 1978.97 | 72.444  | 3837    | 4 | 495.50 | -17.641 |
| P12814 ACTN1_HUMAN Alpha-actinin-1 | 38 |                       | AGTQIENIEEDFR                       | 47  | 13 | 4  | 31.61 | b3b6b11y3                                   | 1521.75 | 72.432  | 2810    | 2 | 761.38 | 19.413  |
| P12814 ACTN1_HUMAN Alpha-actinin-1 | 39 |                       | ASFNHFDR                            | 752 | 8  | 6  | 46.48 | b6°b6y3y4°y4y5                              | 993.45  | 34.955  | 2352    | 2 | 497.23 | -3.072  |
| P12814 ACTN1_HUMAN Alpha-actinin-1 | 40 |                       | DYETATLSEIK                         | 420 | 11 | 3  | 29.45 | b5b9b10                                     | 1269.59 | 73.016  | 1801    | 3 | 423.87 | -20.672 |
| P12814 ACTN1_HUMAN Alpha-actinin-1 | 41 |                       | VPENTMHAMQQK                        | 300 | 12 | 5  | 49.39 | b11y7y8y10y11                               | 1413.69 | 93.601  | 1643    | 2 | 707.35 | 21.760  |
| P12814 ACTN1_HUMAN Alpha-actinin-1 | 42 |                       | NVNIQNFHISWK                        | 162 | 12 | 4  | 20.51 | b3b7°b7y6                                   | 1499.81 | 29.796  | 1590    | 3 | 500.61 | 21.488  |
| P12814 ACTN1_HUMAN Alpha-actinin-1 | 43 |                       | DDPLTNLNTAFDVAEK                    | 198 | 16 | 15 | 90.57 | b5b9b11°b11*b11b14°b14y5°y5y7y8°y8y10y11y12 | 1762.81 | 108.176 | 1515    | 2 | 881.91 | -19.735 |
| P12814 ACTN1_HUMAN Alpha-actinin-1 | 44 |                       | DDPLTNLNTAFDVAEKYLDIPK              | 198 | 22 | 5  | 19.09 | b4b6b9y15°y15                               | 2492.26 | 99.872  | 1174029 | 3 | 831.42 | 0.784   |
| P12814 ACTN1_HUMAN Alpha-actinin-1 | 45 |                       | IDQLEGDHQLIQEALIFDNKHTNYTMEHIR      | 684 | 30 | 11 | 62.15 | b3b5b13°b13y3y5y6y9y10y13y14                | 3621.72 | 76.177  | 156063  | 5 | 725.15 | -14.089 |
| P12814 ACTN1_HUMAN Alpha-actinin-1 | 46 |                       | VLAVNQENEQLMEDYEKLASDLL<br>EWIR     | 264 | 27 | 8  | 37.43 | b6b12b13°b13*b13b18y3y4                     | 3248.58 | 85.917  | 118805  | 4 | 812.90 | -11.573 |
| P12814 ACTN1_HUMAN Alpha-actinin-1 | 47 |                       | TIPWLENRPENTMHAMQQK                 | 292 | 20 | 5  | 38.82 | y6*y6y7y17y18                               | 2423.17 | 68.103  | 91759   | 4 | 606.55 | -11.284 |
| P12814 ACTN1_HUMAN Alpha-actinin-1 | 48 |                       | IVQTYHVNMAGTNPYTTITPQEIN<br>GKWDHVR | 577 | 31 | 13 | 52.05 | b9°b9b11b13y3y4y7y10y12°y12*y12y13y18       | 3583.73 | 67.871  | 90441   | 5 | 717.55 | -11.922 |
| P12814 ACTN1_HUMAN Alpha-actinin-1 | 49 | Carbamidomethyl+C(2)  | ICKVLAVNQENEQLMEDYEK                | 261 | 20 | 3  | 21.34 | b12y7y8                                     | 2453.16 | 105.717 | 56790   | 4 | 614.05 | -2.389  |
| P12814 ACTN1_HUMAN Alpha-actinin-1 | 50 |                       | QKASIHEAWTDGK                       | 400 | 13 | 3  | 26.43 | y3y4y12                                     | 1470.71 | 42.735  | 14386   | 3 | 490.91 | -13.529 |

|                                                    |    |                                            |                                  |      |    |    |        |                                                                                                               |         |         |         |   |         |         |
|----------------------------------------------------|----|--------------------------------------------|----------------------------------|------|----|----|--------|---------------------------------------------------------------------------------------------------------------|---------|---------|---------|---|---------|---------|
| P12814 ACTN1_HUMAN Alpha-actinin-1                 | 51 |                                            | KHEAFESDLAAHQDR                  | 435  | 15 | 5  | 29.51  | b3b4y3°y3y6                                                                                                   | 1753.82 | 32.127  | 6736    | 4 | 439.21  | -5.220  |
| P12814 ACTN1_HUMAN Alpha-actinin-1                 | 52 |                                            | VPENTMHAMQQKLEDFR                | 300  | 17 | 8  | 31.08  | b6°b6b8b9y3y12°y12*y12                                                                                        | 2074.00 | 76.954  | 4845    | 3 | 692.00  | 6.239   |
| P12814 ACTN1_HUMAN Alpha-actinin-1                 | 53 | Carbamidomethyl+C(11)                      | RELPPDQAEYCIAR                   | 849  | 14 | 4  | 28.36  | b6b7b13y4                                                                                                     | 1717.83 | 136.603 | 3743    | 1 | 1717.83 | -0.284  |
| P12814 ACTN1_HUMAN Alpha-actinin-1                 | 54 | Carbamidomethyl+C(9)                       | AETAANRICK                       | 254  | 10 | 4  | 26.75  | b4b5y9*y9                                                                                                     | 1133.56 | 104.684 | 2559    | 1 | 1133.56 | -7.538  |
| P12814 ACTN1_HUMAN Alpha-actinin-1                 | 55 | Carbamidomethyl+C(26)                      | VEQIAAIAQELNELDYDSDPSVNA<br>RCQK | 450  | 28 | 7  | 16     | b4*b4y6*y6y9y11°y11                                                                                           | 3224.53 | 105.777 | 2041    | 3 | 1075.51 | -7.647  |
| P12814 ACTN1_HUMAN Alpha-actinin-1                 | 56 |                                            | EALERTEK                         | 494  | 8  | 3  | 31.02  | b3b4y4                                                                                                        | 975.50  | 41.356  | 1869    | 1 | 975.50  | -13.702 |
| P12814 ACTN1_HUMAN Alpha-actinin-1                 | 57 |                                            | DQALTEEHARQQHNER                 | 614  | 16 | 6  | 41.47  | b7b8b9y6°y6y11                                                                                                | 1961.89 | 48.279  | 1820    | 2 | 981.45  | -14.684 |
| P12814 ACTN1_HUMAN Alpha-actinin-1                 | 58 |                                            | ILAGDKNYITMDELRL                 | 834  | 15 | 5  | 22.62  | b4b5y10°y10*y10                                                                                               | 1751.90 | 66.455  | 1574    | 2 | 876.45  | 0.627   |
| P12814 ACTN1_HUMAN Alpha-actinin-1                 | 59 | Phosphoryl STY(3)                          | AGTQIENIEEDFRDGLK                | 47   | 17 | 3  | 23.58  | y11y13y14                                                                                                     | 2014.93 | 76.354  | 49593   | 2 | 1007.97 | 12.056  |
| P12814 ACTN1_HUMAN Alpha-actinin-1                 | 60 | Carbamidomethyl+C(11)<br>:Phosphoryl STY() | RELPPDQAEYCIAR                   | 849  | 14 | 3  | 23.11  | b9b10y10                                                                                                      | 1797.81 | 45.855  | 18086   | 3 | 599.94  | 10.457  |
| P12814 ACTN1_HUMAN Alpha-actinin-1                 | 61 | Phosphoryl STY(10)                         | MLDAEDIVGTARPDEK                 | 220  | 16 | 7  | 32.44  | b3b8b9°b9y3°y3y13                                                                                             | 1839.80 | 59.590  | 4759    | 2 | 920.41  | -3.915  |
| P12814 ACTN1_HUMAN Alpha-actinin-1                 | 62 | Phosphoryl STY(6)                          | RDQALTEEHAR                      | 613  | 11 | 3  | 22.46  | b4y3y5                                                                                                        | 1405.59 | 21.006  | 2159    | 3 | 469.20  | -13.722 |
| P12814 ACTN1_HUMAN Alpha-actinin-1                 | 63 | Oxidation+M(14)                            | ASIHEAWTDGKEAMLR                 | 402  | 16 | 4  | 25.44  | b7b10b15y10                                                                                                   | 1830.88 | 105.066 | 16199   | 2 | 915.94  | -2.067  |
| P12814 ACTN1_HUMAN Alpha-actinin-1                 | 64 | Oxidation+M(0)                             | VPENTMHAMQQK                     | 300  | 12 | 3  | 24.49  | b3y7y8                                                                                                        | 1429.67 | 89.705  | 2202    | 2 | 715.34  | 11.954  |
| P12814 ACTN1_HUMAN Alpha-actinin-1                 | 65 | Oxidation+M(8)                             | LSNRPAFMPSEGR                    | 346  | 13 | 5  | 31.98  | b11b12y3y7°y7                                                                                                 | 1477.71 | 82.714  | 1529    | 2 | 739.36  | -6.196  |
| P12814 ACTN1_HUMAN Alpha-actinin-1                 | 66 |                                            | LPDADKER                         | 557  | 8  | 0  | 2.4    |                                                                                                               | 943.48  | 25.931  | 16424   | 2 | 472.25  | -1.164  |
| P12814 ACTN1_HUMAN Alpha-actinin-1                 | 67 |                                            | PDADKER                          | 558  | 7  | 0  | 2.4    |                                                                                                               | 830.40  | 25.934  | 12757   | 2 | 415.70  | 1.397   |
| P12814 ACTN1_HUMAN Alpha-actinin-1                 | 68 |                                            | TLPDADKER                        | 556  | 9  | 0  | 2.4    |                                                                                                               | 1044.53 | 25.933  | 9820    | 2 | 522.77  | -1.636  |
| P12814 ACTN1_HUMAN Alpha-actinin-1                 | 69 |                                            | ATLPDADKER                       | 555  | 10 | 1  | 7.86   | y8                                                                                                            | 1097.55 | 25.937  | 2706    | 3 | 366.52  | -3.893  |
| Q6S8J3 A26CA_HUMAN ANKRD26-like family C member 1A | 1  |                                            | AGFAGDDAPR                       | 718  | 10 | 21 | 139.38 | b1b2b3b4b7°b7b8y1y2y3y4°y4y5y6°y6y7°y7y8y9°y9y10                                                              | 976.44  | 30.905  | 1848250 | 2 | 488.73  | -5.126  |
| Q6S8J3 A26CA_HUMAN ANKRD26-like family C member 1A | 2  |                                            | SYELPDGQVITIGNER                 | 938  | 16 | 39 | 218.65 | b2b3°b3b4°b4b5°b5b8°b8b9°b9b10b12°b12b13y1y2°y2y4°y4*y4y5°y5y6°y6*y6y7°y7y8y10*y10y11°y11y12°y12*y12y13y14y16 | 1790.88 | 71.814  | 1483661 | 2 | 895.94  | -5.589  |
| Q6S8J3 A26CA_HUMAN ANKRD26-like family C member 1A | 3  |                                            | AVFPSIVGRPR                      | 728  | 11 | 15 | 104.96 | b1b2b3b9y1y2y3y4y5y6y7y8°y8y9y11                                                                              | 1198.70 | 55.696  | 666000  | 2 | 599.85  | -3.666  |
| Q6S8J3 A26CA_HUMAN ANKRD26-like family C member 1A | 4  | Carbamidomethyl+C(2)                       | LCYVALDFEQEMATAAASSSSLEK         | 915  | 23 | 32 | 242.48 | b2b3b4b5b6b7°b7b8b9b11b12b16°b16y1y3y4y5y6y7y9y10y11°y11y12y14*y14y16y17*y17y18°y18y23                        | 2550.19 | 92.512  | 353053  | 2 | 1275.60 | 5.553   |
| Q6S8J3 A26CA_HUMAN ANKRD26-like family C member 1A | 5  |                                            | QEYDESGSIVHRK                    | 1059 | 14 | 17 | 131.76 | b4°b4*b4y2y3y4y5y6y7y8y9y10°y10y11y12y14*y14                                                                  | 1644.78 | 31.699  | 325281  | 3 | 548.93  | -9.797  |

|                                                     |    |                                                                         |                                    |      |    |    |       |                             |         |         |        |   |         |         |
|-----------------------------------------------------|----|-------------------------------------------------------------------------|------------------------------------|------|----|----|-------|-----------------------------|---------|---------|--------|---|---------|---------|
| [Q6S8J3]A26CA_HUMAN ANKRD26-like family C member 1A | 6  |                                                                         | QEYDESGPSIVHR                      | 1059 | 13 | 10 | 88    | y3y4y5y6y8y10*y10y11y13*y13 | 1516.69 | 37.635  | 152198 | 3 | 506.23  | -9.417  |
| [Q6S8J3]A26CA_HUMAN ANKRD26-like family C member 1A | 7  |                                                                         | DLYTNTVLSGGTTMYPGMAHR              | 991  | 21 | 4  | 19.43 | b4b8b12*b12                 | 2285.10 | 83.869  | 7623   | 3 | 762.37  | 14.424  |
| [Q6S8J3]A26CA_HUMAN ANKRD26-like family C member 1A | 8  |                                                                         | EKDVLENSTLR                        | 640  | 12 | 6  | 31.71 | b2b3b8b9y10*y10             | 1440.73 | 74.514  | 4448   | 2 | 720.87  | -9.490  |
| [Q6S8J3]A26CA_HUMAN ANKRD26-like family C member 1A | 9  |                                                                         | EVEEEMKK                           | 413  | 8  | 8  | 31.02 | b1b5*b5y2y6y7*y7y8          | 1021.47 | 34.946  | 3018   | 2 | 511.24  | -12.130 |
| [Q6S8J3]A26CA_HUMAN ANKRD26-like family C member 1A | 10 |                                                                         | ELENFMAIEEMKK                      | 531  | 13 | 5  | 46.66 | y7y8y9y10*y10               | 1611.79 | 55.165  | 2829   | 2 | 806.40  | 11.361  |
| [Q6S8J3]A26CA_HUMAN ANKRD26-like family C member 1A | 11 |                                                                         | ISSENSNPEQELK                      | 367  | 13 | 4  | 23.72 | b4y6*y6y7                   | 1474.71 | 29.743  | 1788   | 3 | 492.24  | 7.864   |
| [Q6S8J3]A26CA_HUMAN ANKRD26-like family C member 1A | 12 |                                                                         | MTQIMFETFNTPAMYVAIQAVPSL<br>YTSGR  | 818  | 29 | 6  | 15.66 | b13*b13y5*y5y7y11           | 3267.54 | 136.606 | 15037  | 2 | 1634.28 | -13.897 |
| [Q6S8J3]A26CA_HUMAN ANKRD26-like family C member 1A | 13 |                                                                         | TALHLASANGNSEVVK                   | 174  | 16 | 4  | 15.7  | b10b13*b13y8                | 1610.88 | 68.185  | 8429   | 3 | 537.63  | 19.324  |
| [Q6S8J3]A26CA_HUMAN ANKRD26-like family C member 1A | 14 |                                                                         | NDNLLK                             | 686  | 6  | 4  | 25.39 | b4*b4b5*b5                  | 716.38  | 54.171  | 6675   | 1 | 716.38  | -12.865 |
| [Q6S8J3]A26CA_HUMAN ANKRD26-like family C member 1A | 15 | Carbamidomethyl+C(1)                                                    | CQLNVLDNK                          | 196  | 9  | 3  | 28.49 | b4b8y3                      | 1103.56 | 46.895  | 5779   | 2 | 552.28  | 5.863   |
| [Q6S8J3]A26CA_HUMAN ANKRD26-like family C member 1A | 16 | Carbamidomethyl+C(3)                                                    | QFCEEQNTGILHDEILHIEEK              | 601  | 21 | 4  | 19.84 | b13y4y13y17                 | 2582.20 | 92.495  | 5317   | 2 | 1291.61 | -5.862  |
| [Q6S8J3]A26CA_HUMAN ANKRD26-like family C member 1A | 17 |                                                                         | YSSENSNPEQDLK                      | 485  | 13 | 4  | 36.75 | b3b4y5y6                    | 1510.70 | 38.431  | 3649   | 3 | 504.24  | 21.494  |
| [Q6S8J3]A26CA_HUMAN ANKRD26-like family C member 1A | 18 |                                                                         | HGSTHVGFPENLTNGATAGNGDD<br>GLIPPR  | 544  | 29 | 4  | 11.05 | b6b11y8*y8                  | 2901.38 | 108.793 | 3103   | 3 | 967.80  | -3.450  |
| [Q6S8J3]A26CA_HUMAN ANKRD26-like family C member 1A | 19 | Carbamidomethyl+C(1);<br>Carbamidomethyl+C(9);<br>Carbamidomethyl+C(16) | CPEALFQPCFLGMESCGIHETTFN<br>SIMK   | 956  | 28 | 9  | 32.68 | b6*b6b13y3y13*y13y14y17y25  | 3304.48 | 95.987  | 2688   | 3 | 1102.16 | 5.541   |
| [Q6S8J3]A26CA_HUMAN ANKRD26-like family C member 1A | 20 | Carbamidomethyl+C(25)                                                   | ALQLNELTMDDDTAVLVIDNGSG<br>MCK     | 692  | 26 | 6  | 32.56 | b3b9b11b12b14*b14           | 2823.31 | 73.022  | 2127   | 2 | 1412.16 | -3.459  |
| [Q6S8J3]A26CA_HUMAN ANKRD26-like family C member 1A | 21 |                                                                         | HESNNVGLLENLTNGVTAGNGD<br>NGLIPQR  | 421  | 29 | 9  | 26.2  | b6b8*b8b9*b9b11y9*y9y16     | 3003.45 | 105.713 | 1727   | 3 | 1001.82 | -11.461 |
| [Q6S8J3]A26CA_HUMAN ANKRD26-like family C member 1A | 22 |                                                                         | DVLHENSTLR                         | 642  | 10 | 3  | 24.99 | b3b5y7                      | 1183.58 | 35.783  | 1599   | 2 | 592.29  | -21.864 |
| [Q6S8J3]A26CA_HUMAN ANKRD26-like family C member 1A | 23 |                                                                         | DGDRELENFMAIEEMK                   | 527  | 16 | 6  | 22.03 | b4b6y9*y9*y9y11             | 1926.88 | 46.953  | 24506  | 4 | 482.48  | 14.001  |
| [Q6S8J3]A26CA_HUMAN ANKRD26-like family C member 1A | 24 |                                                                         | KHGSTHVGFPENLTNGATAGNGD<br>DGLIPPR | 543  | 30 | 4  | 20.8  | b7y3y11y12                  | 3029.46 | 112.574 | 22020  | 3 | 1010.49 | -8.784  |

|                                                     |    |                                                                               |                                 |     |    |    |       |                                                                |         |         |        |   |         |         |
|-----------------------------------------------------|----|-------------------------------------------------------------------------------|---------------------------------|-----|----|----|-------|----------------------------------------------------------------|---------|---------|--------|---|---------|---------|
| [Q6S8J3]A26CA_HUMAN ANKRD26-like family C member 1A | 25 |                                                                               | SNVGASGDHDDSAMKTLR              | 77  | 18 | 4  | 23.19 | y12y13°y13y16                                                  | 1860.83 | 74.757  | 7396   | 2 | 930.92  | -12.333 |
| [Q6S8J3]A26CA_HUMAN ANKRD26-like family C member 1A | 26 |                                                                               | KHESNNVGLLENLTNGVVTAGNG DNGLPQR | 420 | 30 | 4  | 23.61 | b9b12y14y15                                                    | 3131.56 | 136.535 | 6191   | 2 | 1566.29 | -5.691  |
| [Q6S8J3]A26CA_HUMAN ANKRD26-like family C member 1A | 27 | Carbamidomethyl+C(16)                                                         | QIEVVEKMNSELSLCK                | 622 | 17 | 6  | 20.77 | b3*b3b11y3y12*y12                                              | 1993.98 | 81.890  | 5479   | 2 | 997.49  | -7.408  |
| [Q6S8J3]A26CA_HUMAN ANKRD26-like family C member 1A | 28 |                                                                               | YSSENSNPEQDLKLTSEESQR           | 485 | 22 | 4  | 18.94 | y4°y4y6y9                                                      | 2570.18 | 125.888 | 4708   | 3 | 857.40  | 13.964  |
| [Q6S8J3]A26CA_HUMAN ANKRD26-like family C member 1A | 29 |                                                                               | QMPKYSENSNPEQDLK                | 481 | 17 | 6  | 20.77 | b6*b6b9y10°y10y12                                              | 1994.93 | 102.360 | 4600   | 2 | 997.97  | 10.831  |
| [Q6S8J3]A26CA_HUMAN ANKRD26-like family C member 1A | 30 |                                                                               | SKVGAWGDYDDSAFMEPR              | 114 | 18 | 5  | 27.07 | b8b9°b9y9y12                                                   | 2030.88 | 66.983  | 4448   | 3 | 677.63  | -6.251  |
| [Q6S8J3]A26CA_HUMAN ANKRD26-like family C member 1A | 31 |                                                                               | GYRFTTMAER                      | 896 | 10 | 3  | 24.99 | b8y6y8                                                         | 1231.58 | 68.127  | 3847   | 2 | 616.29  | -8.028  |
| [Q6S8J3]A26CA_HUMAN ANKRD26-like family C member 1A | 32 |                                                                               | LTSEESQRFK                      | 380 | 11 | 3  | 22.46 | b5b10y9                                                        | 1353.65 | 79.418  | 3486   | 1 | 1353.65 | -13.978 |
| [Q6S8J3]A26CA_HUMAN ANKRD26-like family C member 1A | 33 | Carbamidomethyl+C(3);<br>Carbamidomethyl+C(11)<br>;Carbamidomethyl+C(18)<br>) | FRCPEALFQPCFLGMESCGIHETTF NSIMK | 954 | 30 | 5  | 17.38 | b3b10y6y9y16                                                   | 3607.67 | 81.767  | 2447   | 3 | 1203.23 | 10.016  |
| [Q6S8J3]A26CA_HUMAN ANKRD26-like family C member 1A | 34 |                                                                               | GSENGQPEKR                      | 509 | 10 | 6  | 36.65 | b4°b4b7*b7y4y9                                                 | 1101.53 | 34.944  | 2321   | 2 | 551.27  | 0.997   |
| [Q6S8J3]A26CA_HUMAN ANKRD26-like family C member 1A | 35 |                                                                               | GSGKSNVGASGDHDDSAMK             | 73  | 19 | 4  | 13.7  | b3b10°b10y5                                                    | 1819.80 | 81.818  | 2006   | 2 | 910.40  | 7.513   |
| [Q6S8J3]A26CA_HUMAN ANKRD26-like family C member 1A | 36 |                                                                               | QMLKISSENSNPEQELK               | 363 | 17 | 3  | 14.93 | b3b9y8                                                         | 1974.95 | 118.946 | 1796   | 3 | 658.99  | -13.042 |
| [Q6S8J3]A26CA_HUMAN ANKRD26-like family C member 1A | 37 | Phosphoryl STY(6)                                                             | ISSENSNPEQELK                   | 367 | 13 | 3  | 18.95 | b12y7y9_HPO3 y9                                                | 1554.64 | 48.804  | 348932 | 3 | 518.88  | -12.485 |
| [Q6S8J3]A26CA_HUMAN ANKRD26-like family C member 1A | 38 | Carbamidomethyl+C(12)<br>;Phosphoryl STY()                                    | EYAVSSHHVICQLLSDYKEK            | 342 | 21 | 7  | 28.57 | b3_HPO3<br>b3y5°y5y6°y6y10y18                                  | 2623.21 | 121.446 | 21793  | 3 | 875.07  | 5.305   |
| [Q6S8J3]A26CA_HUMAN ANKRD26-like family C member 1A | 39 | Phosphoryl STY()                                                              | VVEVDSMPAASSVK                  | 1   | 14 | 7  | 39.26 | b6°b6b8°b8b9b11_H3PO4<br>b11_HPO3 b11y12_H3PO4<br>y12_HPO3 y12 | 1498.69 | 41.809  | 3897   | 3 | 500.23  | 5.783   |
| [Q6S8J3]A26CA_HUMAN ANKRD26-like family C member 1A | 40 | Phosphoryl STY()                                                              | YLEDIESVKK                      | 675 | 10 | 4  | 37.44 | b3b5b6y8_H3PO4 y8                                              | 1303.60 | 23.871  | 2434   | 2 | 652.30  | -7.491  |
| [Q6S8J3]A26CA_HUMAN ANKRD26-like family C member 1A | 41 | Phosphoryl STY(7)                                                             | DVLHENSTLR                      | 642 | 10 | 3  | 24.99 | b5y3y8                                                         | 1263.57 | 49.790  | 1904   | 2 | 632.29  | 2.802   |
| [Q6S8J3]A26CA_HUMAN ANKRD26-like family C member 1A | 42 | Oxidation+M()                                                                 | DLYTNTVLSGGTTMYPGMAHR           | 991 | 21 | 3  | 12.79 | b5b17y18                                                       | 2301.09 | 90.656  | 7775   | 3 | 767.70  | 11.459  |
| [Q6S8J3]A26CA_HUMAN ANKRD26-like family C member 1A | 43 | Oxidation+M(1)                                                                | MSQELEINKDGDR                   | 400 | 13 | 10 | 44.07 | b10*b10y5y6°y6*y6y7°y7*y7y9                                    | 1550.73 | 58.627  | 5497   | 2 | 775.87  | 9.604   |

|                                                    |    |                       |                               |     |    |    |        |                                                     |         |         |        |   |         |         |
|----------------------------------------------------|----|-----------------------|-------------------------------|-----|----|----|--------|-----------------------------------------------------|---------|---------|--------|---|---------|---------|
| Q6S8J3 A26CA_HUMAN ANKRD26-like family C member 1A | 44 | Oxidation+M(19)       | MSQELEINKDGDREVEEEMK          | 400 | 20 | 3  | 20     | b7b9b18                                             | 2425.05 | 79.478  | 3143   | 4 | 607.02  | -12.987 |
| Q6S8J3 A26CA_HUMAN ANKRD26-like family C member 1A | 45 |                       | ELENFMAIEEMK                  | 531 | 12 | 3  | 20.3   | y8y9*y9                                             | 1483.69 | 55.114  | 10043  | 3 | 495.24  | 8.721   |
| Q9BQE3 TBA1C_HUMAN Tubulin alpha-1C chain          | 1  |                       | AVFVDLEPTVIDEVR               | 64  | 15 | 21 | 168.35 | b3b4b5b6b7y1y2y3*y3y4y5*y5y6y8y9*y9y10y11*y11y12y15 | 1701.91 | 84.403  | 210134 | 2 | 851.46  | 1.219   |
| Q9BQE3 TBA1C_HUMAN Tubulin alpha-1C chain          | 2  |                       | VGINYQPPTVVPGGDLAK            | 352 | 18 | 15 | 87.73  | b5b6*b6b7b8b10b11*b11y1y2y3y7y8y12y18               | 1824.99 | 65.711  | 206983 | 2 | 913.00  | 0.134   |
| Q9BQE3 TBA1C_HUMAN Tubulin alpha-1C chain          | 3  |                       | QLFHPEQLITGKEDAANNYAR         | 84  | 21 | 15 | 73.71  | b2b6*b6y1y3y5y6y7*y7y9y10y12y14y21*y21              | 2415.17 | 61.978  | 173887 | 4 | 604.55  | -13.444 |
| Q9BQE3 TBA1C_HUMAN Tubulin alpha-1C chain          | 4  |                       | NLDIERPTYTNLNR                | 215 | 14 | 17 | 62.25  | b2*b2b3b11y2y4*y4y5y7*y7y8*y8*y8y10*y10y14*y14      | 1718.86 | 52.575  | 137426 | 3 | 573.63  | -10.440 |
| Q9BQE3 TBA1C_HUMAN Tubulin alpha-1C chain          | 5  |                       | IHFPLATYAPVISA EK             | 264 | 16 | 6  | 32.84  | b1b2y4y5y7y14                                       | 1756.94 | 78.230  | 119177 | 3 | 586.32  | -11.533 |
| Q9BQE3 TBA1C_HUMAN Tubulin alpha-1C chain          | 6  |                       | EIIDLV LDR                    | 112 | 9  | 11 | 56.4   | b2b3*b3b4*b4y1y2y5y6y7y9                            | 1085.61 | 79.517  | 78410  | 2 | 543.31  | -4.948  |
| Q9BQE3 TBA1C_HUMAN Tubulin alpha-1C chain          | 7  |                       | LISQIVSSITASLR                | 229 | 14 | 7  | 54.36  | b4b5b6y4y5y8y14                                     | 1487.88 | 100.003 | 52439  | 2 | 744.44  | 1.887   |
| Q9BQE3 TBA1C_HUMAN Tubulin alpha-1C chain          | 8  |                       | FDGALNVDLTEFQTNLVPYPR         | 243 | 21 | 7  | 33.99  | b2b17y2y4y5y6y21                                    | 2409.22 | 94.857  | 48004  | 2 | 1205.11 | 5.675   |
| Q9BQE3 TBA1C_HUMAN Tubulin alpha-1C chain          | 9  | Carbamidomethyl+C(8)  | TIQFVDWCPTGFK                 | 339 | 13 | 6  | 27.21  | b3b7y4y7*y7y13                                      | 1598.77 | 83.302  | 38719  | 2 | 799.89  | 2.367   |
| Q9BQE3 TBA1C_HUMAN Tubulin alpha-1C chain          | 10 |                       | LSVDYGKK                      | 156 | 8  | 5  | 51.25  | y3y4y5y7y8                                          | 909.50  | 29.494  | 31401  | 2 | 455.25  | -7.717  |
| Q9BQE3 TBA1C_HUMAN Tubulin alpha-1C chain          | 11 |                       | AFVHWYV GEGMEEGFSEARED MAALEK | 402 | 28 | 4  | 23.8   | b7b14y11y12                                         | 3217.47 | 94.241  | 2736   | 3 | 1073.16 | 13.431  |
| Q9BQE3 TBA1C_HUMAN Tubulin alpha-1C chain          | 12 | Carbamidomethyl+C(15) | AYHEQLTVAEITNACFEPANQMV K     | 280 | 24 | 7  | 46.56  | b7b8*b8b9b10*b10y8                                  | 2764.31 | 73.999  | 8649   | 3 | 922.11  | -0.530  |
| P67936 TPM4_HUMAN Tropomyosin alpha-4 chain        | 1  |                       | IQLVEELDR                     | 55  | 10 | 16 | 95.04  | b2*b2b3y1y2y3y4*y4y5*y5y6y7y8y9*y9y10               | 1243.65 | 59.102  | 271670 | 2 | 622.33  | -2.454  |
| P67936 TPM4_HUMAN Tropomyosin alpha-4 chain        | 2  |                       | TIDDLEEK                      | 215 | 8  | 12 | 58.93  | b1*b1b4y1y2*y2y4y5*y5y6y7y8                         | 962.47  | 34.941  | 99586  | 2 | 481.74  | -1.903  |
| P67936 TPM4_HUMAN Tropomyosin alpha-4 chain        | 3  |                       | IQALQQADEAEDR                 | 13  | 14 | 17 | 122.06 | b2b3b4b10y1y3y4y5y8*y8y9*y9y10*y10y11y12y14         | 1614.77 | 39.523  | 90917  | 2 | 807.89  | 1.814   |
| P67936 TPM4_HUMAN Tropomyosin alpha-4 chain        | 4  |                       | AEGDVAALNRR                   | 44  | 11 | 7  | 34.22  | b2y5*y5y7*y7y10y11                                  | 1171.62 | 29.927  | 54757  | 2 | 586.31  | 0.313   |
| P67936 TPM4_HUMAN Tropomyosin alpha-4 chain        | 5  |                       | LATALQK                       | 69  | 7  | 10 | 60.22  | b4*b4y3y4y5*y5y6*y6y7*y7                            | 744.45  | 28.648  | 24903  | 2 | 372.73  | -9.264  |
| P67936 TPM4_HUMAN Tropomyosin alpha-4 chain        | 6  | Carbamidomethyl+C(19) | EENVGLHQTLDTLNELNCI           | 228 | 20 | 5  | 30.76  | b16y4y6y9y11                                        | 2340.13 | 89.301  | 84224  | 2 | 1170.57 | 8.555   |
| P67936 TPM4_HUMAN Tropomyosin alpha-4 chain        | 7  |                       | AEGDVAALNR                    | 44  | 10 | 5  | 37.44  | b4*b4b6b7y8                                         | 1015.51 | 34.975  | 4405   | 2 | 508.26  | -1.923  |
| P67936 TPM4_HUMAN Tropomyosin alpha-4 chain        | 8  |                       | KLVI GELER                    | 131 | 11 | 4  | 25.47  | b4y6*y6y7                                           | 1298.76 | 62.060  | 55409  | 2 | 649.89  | -2.914  |
| P67936 TPM4_HUMAN Tropomyosin alpha-4 chain        | 9  |                       | KIQALQQADEAEDR                | 12  | 15 | 5  | 42.47  | b3b5y5y6y7                                          | 1742.85 | 36.729  | 37549  | 3 | 581.62  | -7.845  |
| P67936 TPM4_HUMAN Tropomyosin alpha-4 chain        | 10 |                       | LEKTIDDLEEK                   | 212 | 11 | 3  | 22.46  | b7y5y7                                              | 1332.68 | 57.471  | 6121   | 2 | 666.84  | -9.893  |
| P67936 TPM4_HUMAN Tropomyosin alpha-4 chain        | 11 |                       | EKAEGDVAALNR                  | 42  | 12 | 3  | 20.51  | b3y4y8                                              | 1272.65 | 30.606  | 5678   | 2 | 636.83  | -7.194  |
| P67936 TPM4_HUMAN Tropomyosin alpha-4 chain        | 12 |                       | DEEKMEIQEMQLK                 | 100 | 13 | 6  | 31.61  | b7b9b11*b11y11*y11                                  | 1650.76 | 49.855  | 2757   | 2 | 825.88  | -6.729  |
| P67936 TPM4_HUMAN Tropomyosin alpha-4 chain        | 13 |                       | SLEAASEKYSEK                  | 169 | 12 | 5  | 46.88  | b5b8y4y5y6                                          | 1341.65 | 58.580  | 2397   | 2 | 671.33  | -2.912  |



|                                             |    |                                           |                              |     |    |    |        |                                                 |         |         |        |   |         |         |
|---------------------------------------------|----|-------------------------------------------|------------------------------|-----|----|----|--------|-------------------------------------------------|---------|---------|--------|---|---------|---------|
| P67936 TPM4_HUMAN Tropomyosin alpha-4 chain | 14 |                                           | AQGLQRELDGER                 | 27  | 12 | 7  | 31.71  | b9*b9*b9y4y6y7y7                                | 1371.69 | 36.543  | 1764   | 2 | 686.35  | -7.208  |
| P67936 TPM4_HUMAN Tropomyosin alpha-4 chain | 15 | Phosphoryl STY(5)                         | AGLSLEAVKR                   | 1   | 11 | 3  | 34.22  | y4y5y6                                          | 1237.60 | 55.068  | 3990   | 3 | 413.21  | -13.513 |
| P67936 TPM4_HUMAN Tropomyosin alpha-4 chain | 16 | Carbamidomethyl+C(24);Phosphoryl STY(14)  | LAQAKEENVGLHQTLTDLNCLN       | 223 | 25 | 6  | 20.42  | b4b12b21y9*y9y11                                | 2931.40 | 84.034  | 3039   | 4 | 733.61  | 6.080   |
| P67936 TPM4_HUMAN Tropomyosin alpha-4 chain | 17 |                                           | GDVAALNRR                    | 46  | 9  | 2  | 20.8   | b3b4                                            | 971.53  | 29.922  | 32926  | 2 | 486.27  | -4.209  |
| P67936 TPM4_HUMAN Tropomyosin alpha-4 chain | 18 |                                           | EGDVAALNRR                   | 45  | 10 | 1  | 7.55   | b3                                              | 1100.58 | 29.915  | 12939  | 2 | 550.79  | -3.217  |
| P67936 TPM4_HUMAN Tropomyosin alpha-4 chain | 19 |                                           | AEGDVAALNRR                  | 44  | 11 | 0  | 2.88   |                                                 | 1153.59 | 29.934  | 2661   | 3 | 385.20  | -12.275 |
| Q71U36 TBA1A_HUMAN Tubulin alpha-1A chain   | 1  |                                           | AVFVDLEPTVIDEVR              | 64  | 15 | 21 | 168.35 | b3b4b5b6b7y1y2y3y3y4y5y5y6y8y9y9y10y11y11y12y15 | 1701.91 | 84.403  | 210134 | 2 | 851.46  | 1.219   |
| Q71U36 TBA1A_HUMAN Tubulin alpha-1A chain   | 2  |                                           | VGINYQPPTVVPGGDLAK           | 352 | 18 | 15 | 87.73  | b5b6*b6b7b8b10b11*b11y1y2y3y7y8y12y18           | 1824.99 | 65.711  | 206983 | 2 | 913.00  | 0.134   |
| Q71U36 TBA1A_HUMAN Tubulin alpha-1A chain   | 3  |                                           | QLFHPEQLITGKEDAANNYAR        | 84  | 21 | 15 | 73.71  | b2b6*b6y1y3y5y6y7*y7y9y10y12y14y21*y21          | 2415.17 | 61.978  | 173887 | 4 | 604.55  | -13.444 |
| Q71U36 TBA1A_HUMAN Tubulin alpha-1A chain   | 4  |                                           | NLDIERPTYTNLNR               | 215 | 14 | 17 | 62.25  | b2*b2b3b11y2y4*y4y5y7y7y8*y8*y8y10*y10y14*y14   | 1718.86 | 52.575  | 137426 | 3 | 573.63  | -10.440 |
| Q71U36 TBA1A_HUMAN Tubulin alpha-1A chain   | 5  |                                           | IHFPLATYAPVISA EK            | 264 | 16 | 6  | 32.84  | b1b2y4y5y7y14                                   | 1756.94 | 78.230  | 119177 | 3 | 586.32  | -11.533 |
| Q71U36 TBA1A_HUMAN Tubulin alpha-1A chain   | 6  |                                           | EIIDLV LDR                   | 112 | 9  | 11 | 56.4   | b2b3*b3b4*b4y1y2y5y6y7y9                        | 1085.61 | 79.517  | 78410  | 2 | 543.31  | -4.948  |
| Q71U36 TBA1A_HUMAN Tubulin alpha-1A chain   | 7  | Carbamidomethyl+C(15)                     | AYHEQLSVAEITNACFEPANQMV K    | 280 | 24 | 9  | 39.35  | b7b10b11y1y4y7y9y11y24                          | 2750.31 | 73.355  | 59845  | 3 | 917.44  | 5.060   |
| Q71U36 TBA1A_HUMAN Tubulin alpha-1A chain   | 8  |                                           | FDGALNVDLTEFQTNLVPYPR        | 243 | 21 | 7  | 33.99  | b2b17y2y4y5y6y21                                | 2409.22 | 94.857  | 48004  | 2 | 1205.11 | 5.675   |
| Q71U36 TBA1A_HUMAN Tubulin alpha-1A chain   | 9  | Carbamidomethyl+C(8)                      | TIQFVDWCPTGFK                | 339 | 13 | 6  | 27.21  | b3b7y4y7y7y13                                   | 1598.77 | 83.302  | 38719  | 2 | 799.89  | 2.367   |
| Q71U36 TBA1A_HUMAN Tubulin alpha-1A chain   | 10 |                                           | LSVDYGKK                     | 156 | 8  | 5  | 51.25  | y3y4y5y7y8                                      | 909.50  | 29.494  | 31401  | 2 | 455.25  | -7.717  |
| Q71U36 TBA1A_HUMAN Tubulin alpha-1A chain   | 11 |                                           | AFVHWYVVGEGMEEGFSEAREDMAALEK | 402 | 28 | 4  | 23.8   | b7b14y11y12                                     | 3217.47 | 94.241  | 2736   | 3 | 1073.16 | 13.431  |
| Q71U36 TBA1A_HUMAN Tubulin alpha-1A chain   | 12 | Carbamidomethyl+C(4);Carbamidomethyl+C(5) | YMACCLLYRGD VVPK             | 311 | 15 | 3  | 16.6   | b9b13y14                                        | 1844.89 | 76.254  | 5051   | 2 | 922.95  | 0.397   |
| Q71U36 TBA1A_HUMAN Tubulin alpha-1A chain   | 13 |                                           | TIGGGD SFNTFFSETGAGKHVPR     | 40  | 24 | 6  | 25.2   | b5*b5b6b22y11y21                                | 2497.17 | 105.698 | 3480   | 3 | 833.06  | -3.324  |
| Q71U36 TBA1A_HUMAN Tubulin alpha-1A chain   | 14 | Carbamidomethyl+C(15);Phosphoryl STY()    | AYHEQLSVAEITNACFEPANQMV K    | 280 | 24 | 3  | 11.85  | b9b13_H3PO4 b13y12_HPO3y12                      | 2830.27 | 91.571  | 16661  | 4 | 708.32  | 9.316   |
| Q71U36 TBA1A_HUMAN Tubulin alpha-1A chain   | 15 | Oxidation+M()                             | AFVHWYVVGEGMEEGFSEAREDMAALEK | 402 | 28 | 6  | 28.65  | b8b11b13y8y9y9                                  | 3233.45 | 95.433  | 3106   | 4 | 809.12  | 10.873  |
| P02100 HBE_HUMAN Hemoglobin subunit epsilon | 1  |                                           | LLVVPWTQR                    | 31  | 10 | 18 | 109.71 | b2b3b4b5y1y2*y2y3*y3y4*y4y5*y5*y5y6y7y8y10      | 1274.72 | 78.838  | 591442 | 2 | 637.87  | -1.436  |
| P02100 HBE_HUMAN Hemoglobin subunit epsilon | 2  |                                           | EFTPEVQAAWQK                 | 121 | 12 | 4  | 20.51  | b3*b3y7y11                                      | 1433.72 | 79.369  | 7445   | 2 | 717.36  | 10.473  |
| P02100 HBE_HUMAN Hemoglobin subunit epsilon | 3  |                                           | NMDNLKPFAK                   | 77  | 11 | 3  | 34.22  | b7b8b9                                          | 1248.65 | 64.825  | 4036   | 2 | 624.83  | 4.204   |
| P02100 HBE_HUMAN Hemoglobin subunit epsilon | 4  | Carbamidomethyl+C(17)                     | NMDNLKPFAKLSELHCDK           | 77  | 19 | 3  | 21.48  | b14y4y5                                         | 2231.08 | 77.330  | 35497  | 2 | 1116.04 | -8.754  |
| P02100 HBE_HUMAN Hemoglobin subunit epsilon | 5  |                                           | VHFTAEEKAAV TSLWSK           | 1   | 17 | 3  | 14.93  | b7y13y15                                        | 1903.98 | 102.123 | 4647   | 3 | 635.33  | -6.155  |

|                                             |    |                                             |                                 |     |    |    |        |                                                     |         |         |        |   |         |         |
|---------------------------------------------|----|---------------------------------------------|---------------------------------|-----|----|----|--------|-----------------------------------------------------|---------|---------|--------|---|---------|---------|
| P02100 HBE_HUMAN Hemoglobin subunit epsilon | 6  |                                             | AAVTLWWSKMNVEEAGGEALGR          | 9   | 22 | 3  | 12.43  | b7b14y12                                            | 2276.11 | 89.067  | 4275   | 3 | 759.38  | -8.474  |
| P02100 HBE_HUMAN Hemoglobin subunit epsilon | 7  | Oxidation+M(1)                              | MVHFTAEEK                       | 0   | 9  | 6  | 58.17  | b8*b8y3y4y5y6                                       | 1107.51 | 43.730  | 132394 | 2 | 554.26  | -0.110  |
| P02100 HBE_HUMAN Hemoglobin subunit epsilon | 8  | Oxidation+M(1)                              | MNVEEAGGEALGR                   | 18  | 13 | 4  | 23.72  | b8b9*b9y4                                           | 1348.62 | 49.702  | 7441   | 1 | 1348.62 | 4.707   |
| Q86UX7 URP2_HUMAN Fermitin family homolog 3 | 1  |                                             | VVLAGGVAPALFR                   | 166 | 13 | 13 | 110.59 | b2b3b4b6y2y5y6y7y8y9y10y11y13                       | 1269.76 | 77.631  | 276628 | 2 | 635.38  | -6.153  |
| Q86UX7 URP2_HUMAN Fermitin family homolog 3 | 2  |                                             | LLVPSPEGMSEIYLR                 | 423 | 15 | 8  | 51.74  | b2b3y3y6y10y11y12y15                                | 1703.91 | 85.732  | 178328 | 2 | 852.46  | 1.146   |
| Q86UX7 URP2_HUMAN Fermitin family homolog 3 | 3  |                                             | TGSGGPGNHHPGPDASAEGLNPLYGLVAPR  | 481 | 29 | 20 | 132.2  | b8b9*b9b10b12*b12b14b19b21y2y3y4y5y6y7y8y9y12y15y29 | 2782.30 | 59.451  | 98723  | 4 | 696.33  | -8.687  |
| Q86UX7 URP2_HUMAN Fermitin family homolog 3 | 4  |                                             | LEGSAPTDVLDLSTTIPELKDHLR        | 333 | 24 | 6  | 17.82  | b2b8y3y8y19y24                                      | 2620.35 | 88.966  | 97327  | 4 | 655.84  | -13.323 |
| Q86UX7 URP2_HUMAN Fermitin family homolog 3 | 5  | Carbamidomethyl+C(15)                       | ASFSQPLFQAVAAICR                | 113 | 16 | 15 | 121.93 | b3*b3b4*b4b5y2y3y4y5y6y7y8y9y11y16                  | 1765.91 | 91.761  | 95439  | 2 | 883.46  | 2.972   |
| Q86UX7 URP2_HUMAN Fermitin family homolog 3 | 6  |                                             | ILEAHQNVAQLSLAEQLR              | 523 | 19 | 16 | 92.27  | b1b7b8*b8b9*b9b12y1y2y4y5y6y7y8y13y19               | 2104.13 | 65.927  | 91806  | 3 | 702.05  | -9.166  |
| Q86UX7 URP2_HUMAN Fermitin family homolog 3 | 7  | Carbamidomethyl+C(15)                       | GMPAHFSDSAQTEACYHMLSRPQPPPDLQLR | 179 | 33 | 6  | 14.64  | b2b12y4y6y22y33                                     | 3747.76 | 69.968  | 56166  | 4 | 937.70  | -5.798  |
| Q86UX7 URP2_HUMAN Fermitin family homolog 3 | 8  |                                             | GEELDEDLFLQLTGGHEAF             | 648 | 19 | 9  | 21.65  | b2*b2b12y1y9y11y13*y13y19                           | 2120.00 | 100.732 | 44858  | 2 | 1060.51 | 10.019  |
| Q86UX7 URP2_HUMAN Fermitin family homolog 3 | 9  | Carbamidomethyl+C(2)                        | GCEVVPDENVSGQK                  | 405 | 14 | 15 | 67.69  | b2b3b4y1y2*y2y3*y3y4*y4y6y9*y9y10y14                | 1487.72 | 47.948  | 39253  | 2 | 744.37  | 4.595   |
| Q86UX7 URP2_HUMAN Fermitin family homolog 3 | 10 |                                             | TMADSSYTSEVQAILAFLSLQR          | 459 | 22 | 9  | 59.29  | b2y1y2y4y5y6y7y8y22                                 | 2431.21 | 120.095 | 26364  | 3 | 811.07  | -4.418  |
| Q86UX7 URP2_HUMAN Fermitin family homolog 3 | 11 | Carbamidomethyl+C(16);Carbamidomethyl+C(21) | QVAIEFDEHINVAFCVVSASCR          | 607 | 22 | 3  | 22.3   | y4y5y14                                             | 2539.15 | 81.447  | 24355  | 3 | 847.06  | -7.115  |
| Q86UX7 URP2_HUMAN Fermitin family homolog 3 | 12 |                                             | LSQSGEVGEPAGTDPGLDDLDVALSNLEVK  | 303 | 30 | 9  | 32.64  | b6b7b9*b9y2y3y6y7y30                                | 3025.53 | 95.577  | 24318  | 3 | 1009.18 | 13.315  |
| Q86UX7 URP2_HUMAN Fermitin family homolog 3 | 13 |                                             | EKEPEEELYDLSK                   | 153 | 13 | 9  | 61.47  | b6b8b9*b9b11b13y7y11y12                             | 1608.77 | 76.286  | 6351   | 2 | 804.89  | 1.442   |
| Q86UX7 URP2_HUMAN Fermitin family homolog 3 | 14 |                                             | VFVGEEDPEAESVTLR                | 19  | 16 | 3  | 15.7   | b14y7y11                                            | 1776.87 | 60.127  | 25686  | 2 | 888.94  | 4.946   |
| Q86UX7 URP2_HUMAN Fermitin family homolog 3 | 15 |                                             | FIQAWQSLPDFGISYVMVR             | 542 | 19 | 7  | 13.7   | b5*b5b10*b10*b10y10*y10                             | 2257.13 | 122.091 | 9700   | 3 | 753.05  | -8.112  |
| Q86UX7 URP2_HUMAN Fermitin family homolog 3 | 16 |                                             | LEGSAPTDVLDLSTTIPELK            | 333 | 20 | 5  | 35.81  | b4b6b7b8*b8                                         | 2099.07 | 66.451  | 6285   | 3 | 700.36  | -17.911 |
| Q86UX7 URP2_HUMAN Fermitin family homolog 3 | 17 |                                             | WLDSSR                          | 228 | 6  | 3  | 37.84  | b5y4y5                                              | 763.37  | 34.978  | 5001   | 2 | 382.19  | -0.560  |
| Q86UX7 URP2_HUMAN Fermitin family homolog 3 | 18 |                                             | FSNMR                           | 593 | 5  | 1  | 12.45  | b4                                                  | 654.30  | 31.486  | 4890   | 1 | 654.30  | -11.474 |
| Q86UX7 URP2_HUMAN Fermitin family homolog 3 | 19 |                                             | DEILGIANNR                      | 567 | 10 | 5  | 24.99  | b5*b5b8*b8y4                                        | 1114.58 | 99.836  | 4392   | 1 | 1114.58 | -8.214  |
| Q86UX7 URP2_HUMAN Fermitin family homolog 3 | 20 |                                             | YYSFFDLDPK                      | 252 | 10 | 4  | 52.21  | y3y5y6y8                                            | 1294.58 | 80.174  | 2500   | 1 | 1294.58 | -16.973 |
| Q86UX7 URP2_HUMAN Fermitin family homolog 3 | 21 |                                             | EKEPEEELYDLSK                   | 153 | 13 | 4  | 18.95  | b9*b9y3y5                                           | 1608.76 | 56.354  | 32827  | 3 | 536.92  | -3.187  |
| Q86UX7 URP2_HUMAN Fermitin family homolog 3 | 22 |                                             | ARGEELDEDLFLQLTGGHEAF           | 646 | 21 | 4  | 22.85  | b5b9b10y5                                           | 2347.11 | 94.901  | 32128  | 3 | 783.04  | -4.785  |
| Q86UX7 URP2_HUMAN Fermitin family homolog 3 | 23 | Carbamidomethyl+C(1)                        | CLMQQGIKAGDALWLR                | 234 | 16 | 6  | 38.68  | b7b10b13*b13b15y3                                   | 1859.96 | 80.124  | 17912  | 2 | 930.48  | -0.591  |
| Q86UX7 URP2_HUMAN Fermitin family homolog 3 | 24 | Carbamidomethyl+C(2);Carbamidomethyl+C(16)  | GCEVVPDENVSGQKFCIK              | 405 | 18 | 5  | 30.49  | b6b8*b8b9b13                                        | 2036.02 | 67.604  | 7343   | 3 | 679.34  | 10.792  |
| Q86UX7 URP2_HUMAN Fermitin family homolog 3 | 25 |                                             | FKYYSFFDLDPK                    | 250 | 12 | 3  | 20.51  | b8b10y10                                            | 1569.75 | 84.926  | 3626   | 3 | 523.92  | -5.210  |

|                                                         |    |                                      |                              |     |    |    |        |                                                                            |         |         |        |   |         |         |
|---------------------------------------------------------|----|--------------------------------------|------------------------------|-----|----|----|--------|----------------------------------------------------------------------------|---------|---------|--------|---|---------|---------|
| Q86UX7 URP2_HUMAN Fermitin family homolog 3             | 26 |                                      | ETTLSYYKSQDEAPGDPIQLNLK      | 381 | 24 | 4  | 26.34  | b3b6b10b15                                                                 | 2738.35 | 110.732 | 3093   | 3 | 913.45  | -0.802  |
| Q86UX7 URP2_HUMAN Fermitin family homolog 3             | 27 | Carbamidomethyl+C(8)                 | FQAVAAICR                    | 120 | 9  | 1  | 7.32   | b4                                                                         | 1035.53 | 91.704  | 4700   | 2 | 518.27  | -10.020 |
| P62937 PIIA_HUMAN Peptidyl-prolyl cis-trans isomerase A | 1  | Carbamidomethyl+C(7)                 | IIPGFMCQGGDFTR               | 55  | 14 | 10 | 100.94 | b2y3y6y7y8y9y10y11y12y14                                                   | 1598.75 | 71.096  | 84876  | 2 | 799.88  | 3.207   |
| P62937 PIIA_HUMAN Peptidyl-prolyl cis-trans isomerase A | 2  | Carbamidomethyl+C(24)                | HTGPGILSMANAGPNTNGSQFFICTAK  | 91  | 27 | 18 | 81.83  | b2b5°b5b6b12°b12b13b17*y4°y4y5y8y10y11y12*y12y14y27                        | 2791.32 | 76.357  | 67389  | 3 | 931.11  | -1.924  |
| P62937 PIIA_HUMAN Peptidyl-prolyl cis-trans isomerase A | 3  |                                      | EGMNIVEAMER                  | 133 | 11 | 5  | 34.22  | y2y6y8y10y11                                                               | 1278.59 | 68.482  | 33843  | 2 | 639.80  | 2.673   |
| P62937 PIIA_HUMAN Peptidyl-prolyl cis-trans isomerase A | 4  |                                      | VNPTVFFDIAVDGPELGR           | 1   | 18 | 5  | 33.19  | b2y7y8y9y18                                                                | 1946.02 | 98.217  | 21437  | 2 | 973.51  | 8.092   |
| P62937 PIIA_HUMAN Peptidyl-prolyl cis-trans isomerase A | 5  |                                      | TEWLDGK                      | 118 | 7  | 4  | 38.32  | b4y4y6y7                                                                   | 848.42  | 55.679  | 5275   | 1 | 848.42  | 8.993   |
| P62937 PIIA_HUMAN Peptidyl-prolyl cis-trans isomerase A | 6  | Carbamidomethyl+C(7)                 | IIPGFMCQGGDFTRHNGTGK         | 55  | 21 | 4  | 22.44  | y10y12*y12y13                                                              | 2250.07 | 84.836  | 61507  | 2 | 1125.54 | 6.402   |
| P62937 PIIA_HUMAN Peptidyl-prolyl cis-trans isomerase A | 7  |                                      | SIYGEKFEDEFILK               | 76  | 15 | 3  | 16.6   | b8b10y9                                                                    | 1831.90 | 54.623  | 2301   | 2 | 916.45  | -8.463  |
| P62937 PIIA_HUMAN Peptidyl-prolyl cis-trans isomerase A | 8  |                                      | VKEGMNIVEAMER                | 131 | 13 | 3  | 23.72  | b3y5y6                                                                     | 1505.74 | 23.934  | 2166   | 3 | 502.59  | -0.973  |
| P62937 PIIA_HUMAN Peptidyl-prolyl cis-trans isomerase A | 9  |                                      | HNGTGGKSIYGEK                | 69  | 13 | 5  | 29.85  | b6°b6b7b12y4                                                               | 1347.65 | 76.268  | 2129   | 2 | 674.33  | -14.221 |
| P62937 PIIA_HUMAN Peptidyl-prolyl cis-trans isomerase A | 10 | Carbamidomethyl+C(24);Oxidation+M(9) | HTGPGILSMANAGPNTNGSQFFICTAK  | 91  | 27 | 4  | 16.38  | b18y4y13y16                                                                | 2807.34 | 92.438  | 33995  | 2 | 1404.17 | 5.740   |
| P04075 ALDOA_HUMAN Fructose-bisphosphate aldolase A     | 1  |                                      | IGEHTPSALAIMENANVLAR         | 153 | 20 | 16 | 109.2  | b4b5b8°b8b9b10y2y3y5y6y7y8°y8y10y15y20                                     | 2107.08 | 80.835  | 123483 | 3 | 703.03  | -6.489  |
| P04075 ALDOA_HUMAN Fructose-bisphosphate aldolase A     | 2  | Carbamidomethyl+C(5)                 | YASICQQNGVIVEPEILPDGDHDLKR   | 173 | 28 | 28 | 139.7  | b2b4b5b7°b7b8b9°b9b10°b10°b10b11°b11b15y1y2y3y5y7y8°y8y9°y9y10y13y14y17y28 | 3176.58 | 76.297  | 114287 | 4 | 794.90  | -6.610  |
| P04075 ALDOA_HUMAN Fructose-bisphosphate aldolase A     | 3  | Carbamidomethyl+C(8)                 | ALANSLACQGK                  | 331 | 11 | 8  | 34.12  | b2b8°b8y2y4y5y8*y8                                                         | 1132.58 | 35.534  | 73233  | 2 | 566.79  | 0.108   |
| P04075 ALDOA_HUMAN Fructose-bisphosphate aldolase A     | 4  |                                      | GVVPLAGTNGETTTQGLDGLSER      | 111 | 23 | 8  | 34.78  | b3y3y5y6y8°y8y20y23                                                        | 2272.15 | 65.174  | 56107  | 2 | 1136.58 | 4.620   |
| P04075 ALDOA_HUMAN Fructose-bisphosphate aldolase A     | 5  |                                      | LQSIGTENTEENRR               | 43  | 14 | 11 | 39.26  | b2°b2b8y3*y3y4y8*y8y12*y12y14                                              | 1646.79 | 29.037  | 44304  | 3 | 549.60  | -10.600 |
| P04075 ALDOA_HUMAN Fructose-bisphosphate aldolase A     | 6  |                                      | GILAADESTGSIK                | 28  | 14 | 10 | 85.61  | b3b4b8b13y4y9y10y11y12y14                                                  | 1332.71 | 48.400  | 40304  | 2 | 666.86  | 3.298   |
| P04075 ALDOA_HUMAN Fructose-bisphosphate aldolase A     | 7  |                                      | GILAADESTGSIK                | 28  | 15 | 9  | 58.63  | b8°b8b13y5y6y9y10y12y15                                                    | 1488.78 | 43.639  | 35063  | 3 | 496.93  | -13.037 |
| P04075 ALDOA_HUMAN Fructose-bisphosphate aldolase A     | 8  |                                      | ALQASALK                     | 304 | 8  | 5  | 31.02  | b5y2y5y6y8                                                                 | 801.48  | 32.797  | 20370  | 2 | 401.24  | -3.198  |
| P04075 ALDOA_HUMAN Fructose-bisphosphate aldolase A     | 9  |                                      | AAQEEYVKR                    | 322 | 9  | 4  | 36.27  | y2y3y4y6                                                                   | 1093.56 | 20.162  | 3074   | 2 | 547.28  | -7.591  |
| P04075 ALDOA_HUMAN Fructose-bisphosphate aldolase A     | 10 |                                      | PYQYPALTPEQK                 | 1   | 12 | 3  | 20.51  | b4b8y8                                                                     | 1434.74 | 55.270  | 134970 | 3 | 478.92  | 11.997  |
| P04075 ALDOA_HUMAN Fructose-bisphosphate aldolase A     | 11 | Carbamidomethyl+C(25)                | ALSDHHIYLEGTLKPNMVTDPGHACTQK | 215 | 28 | 10 | 51.64  | b5b8b14b20y4y5y6y8*y8y13                                                   | 3131.52 | 62.216  | 80356  | 5 | 627.11  | -18.789 |
| P04075 ALDOA_HUMAN Fructose-bisphosphate aldolase A     | 12 |                                      | ELSDIAHR                     | 14  | 8  | 7  | 68.48  | b3b5b7°b7y5°y5y6                                                           | 940.47  | 99.905  | 9386   | 1 | 940.47  | -14.148 |
| P04075 ALDOA_HUMAN Fructose-bisphosphate aldolase A     | 13 |                                      | FSHEEIAMATVTLR               | 243 | 15 | 5  | 24.68  | b7°b7b8°b8b11                                                              | 1675.83 | 36.564  | 5694   | 3 | 559.28  | -8.013  |
| P04075 ALDOA_HUMAN Fructose-bisphosphate aldolase A     | 14 |                                      | MPYQYPALTPEQK                | 0   | 13 | 7  | 31.98  | b5b6y3°y3*y3y5*y5                                                          | 1565.80 | 49.794  | 3209   | 3 | 522.60  | 19.413  |
| P04075 ALDOA_HUMAN Fructose-bisphosphate aldolase A     | 15 |                                      | AAQEEYVK                     | 322 | 8  | 3  | 31.02  | b4b5y5                                                                     | 937.46  | 97.939  | 1655   | 1 | 937.46  | -0.586  |

|                                                      |    |                                           |                                              |     |    |    |        |                                                                                 |         |         |        |   |         |         |
|------------------------------------------------------|----|-------------------------------------------|----------------------------------------------|-----|----|----|--------|---------------------------------------------------------------------------------|---------|---------|--------|---|---------|---------|
| [P04075]ALDOA_HUMAN Fructose-bisphosphate aldolase A | 16 |                                           | VDKGVVPLAGTNGETTTQGLDGLSER                   | 108 | 26 | 3  | 22.1   | y9y15y16                                                                        | 2614.33 | 89.879  | 40011  | 3 | 872.11  | -2.055  |
| [P04075]ALDOA_HUMAN Fructose-bisphosphate aldolase A | 17 | Carbamidomethyl+C(24)                     | GVVPLAGTNGETTTQGLDGLSERCAQYK                 | 111 | 28 | 5  | 23.8   | b12b13*b13y5y10                                                                 | 2922.44 | 103.515 | 3280   | 3 | 974.82  | 5.347   |
| [P04075]ALDOA_HUMAN Fructose-bisphosphate aldolase A | 18 | Phosphoryl STY(5)                         | ALQASALK                                     | 304 | 8  | 5  | 34.03  | b3y5°y5y7°y7                                                                    | 881.45  | 34.944  | 1600   | 2 | 441.23  | 14.541  |
| [P04075]ALDOA_HUMAN Fructose-bisphosphate aldolase A | 19 | Carbamidomethyl+C(25)<br>;Oxidation+M(18) | ALSDHHIYLEGTLLKPNMVTPGHACTQK                 | 215 | 28 | 4  | 11.15  | b11y12°y12y14                                                                   | 3147.54 | 106.235 | 3033   | 4 | 787.64  | -11.092 |
| [P04075]ALDOA_HUMAN Fructose-bisphosphate aldolase A | 20 |                                           | SIGTENTEENRR                                 | 45  | 12 | 0  | 4.32   |                                                                                 | 1405.67 | 29.037  | 1628   | 2 | 703.34  | 3.474   |
| [P04075]ALDOA_HUMAN Fructose-bisphosphate aldolase A | 21 | Carbamidomethyl+C(4)                      | SLACQ GK                                     | 335 | 7  | 0  | 2.88   |                                                                                 | 763.37  | 35.473  | 1570   | 2 | 382.19  | -13.352 |
| [P69905]HBA_HUMAN Hemoglobin subunit alpha           | 1  |                                           | VGAHAGEYGAEALER                              | 17  | 15 | 20 | 158.35 | b4b5b7b8b9°b9b10°b10b11b12y1y3y4y5y6y7°y7y10°y10y15                             | 1529.72 | 40.211  | 342765 | 3 | 510.58  | -6.464  |
| [P69905]HBA_HUMAN Hemoglobin subunit alpha           | 2  |                                           | VADALTNVAHVDDMPNALSALSDLHAHK                 | 62  | 29 | 30 | 186.82 | b2b3b4b5b6°b6b7°b7°b7b14°b14°b14y2y3y4y5y6°y6y7°y7y8y9y10°y10y11y14y21y24y27y29 | 2996.46 | 88.441  | 312972 | 4 | 749.87  | -8.229  |
| [P69905]HBA_HUMAN Hemoglobin subunit alpha           | 3  |                                           | MFLSFPTTK                                    | 32  | 9  | 10 | 64.19  | b2y2°y2y4°y4y5y6y7y8y9                                                          | 1071.55 | 74.348  | 230685 | 2 | 536.28  | -5.468  |
| [P69905]HBA_HUMAN Hemoglobin subunit alpha           | 4  |                                           | TYFPFDLSHGSAQVK                              | 41  | 16 | 6  | 26.11  | b10°b10y7y8*y8y11                                                               | 1833.89 | 83.244  | 12358  | 3 | 611.97  | -1.198  |
| [P69905]HBA_HUMAN Hemoglobin subunit alpha           | 5  |                                           | VDPVNFK                                      | 93  | 7  | 3  | 35.31  | b4b5y3                                                                          | 818.43  | 30.660  | 5282   | 2 | 409.72  | -9.993  |
| [P69905]HBA_HUMAN Hemoglobin subunit alpha           | 6  | Carbamidomethyl+C(5)                      | LLSHCLLVTLAAHLPAEFTPAVHA<br>SLDKFLASVSTVLTSK | 100 | 40 | 7  | 23.92  | b5b6°b6b14y3y7y9                                                                | 4258.27 | 135.914 | 22381  | 5 | 852.46  | -13.645 |
| [P69905]HBA_HUMAN Hemoglobin subunit alpha           | 7  |                                           | AAWGKVGGAHAGEYGAEALER                        | 12  | 20 | 3  | 13.21  | b8b13y7                                                                         | 2043.00 | 106.201 | 3875   | 3 | 681.67  | -0.359  |
| [P69905]HBA_HUMAN Hemoglobin subunit alpha           | 8  |                                           | DALTNVAHVDDMPNALSALSDLHAHK                   | 64  | 27 | 13 | 91.35  | b3°b3b4°b4b5°b5b6°b6b11b12b13b14b16                                             | 2826.35 | 88.457  | 4544   | 4 | 707.34  | -12.784 |
| [P69905]HBA_HUMAN Hemoglobin subunit alpha           | 9  |                                           | PNALSALSDLHAHK                               | 77  | 14 | 1  | 10.18  | b5                                                                              | 1473.77 | 88.441  | 4160   | 3 | 491.93  | -9.774  |
| [P69905]HBA_HUMAN Hemoglobin subunit alpha           | 10 |                                           | ALSALSDLHAHK                                 | 79  | 12 | 1  | 10.18  | b4                                                                              | 1262.68 | 88.427  | 2336   | 2 | 631.84  | -4.930  |
| [P69905]HBA_HUMAN Hemoglobin subunit alpha           | 11 |                                           | LSALSDLHAHK                                  | 80  | 11 | 1  | 10.18  | b6                                                                              | 1191.63 | 88.432  | 1800   | 2 | 596.32  | -11.678 |
| [P69905]HBA_HUMAN Hemoglobin subunit alpha           | 12 |                                           | VGAHAGEY                                     | 17  | 8  | 0  | 4.8    |                                                                                 | 803.38  | 40.255  | 1631   | 1 | 803.38  | 10.181  |
| [P69905]HBA_HUMAN Hemoglobin subunit alpha           | 13 |                                           | VGAHAGEYGAEALER                              | 17  | 15 | 0  | 4.8    |                                                                                 | 1511.71 | 40.215  | 3130   | 3 | 504.58  | -2.746  |
| [Q9NY65]TBA8_HUMAN Tubulin alpha-8 chain             | 1  |                                           | VGINYQPPTVVPGGDLAK                           | 352 | 18 | 15 | 87.73  | b5b6°b6b7b8b10b11°b11y1y2y3y7y8y12y18                                           | 1824.99 | 65.711  | 206983 | 2 | 913.00  | 0.134   |
| [Q9NY65]TBA8_HUMAN Tubulin alpha-8 chain             | 2  |                                           | QLFHPEQLITGKEDAANNYAR                        | 84  | 21 | 15 | 73.71  | b2b6°b6y1y3y5y6y7*y7y9y10y12y14y21*y21                                          | 2415.17 | 61.978  | 173887 | 4 | 604.55  | -13.444 |
| [Q9NY65]TBA8_HUMAN Tubulin alpha-8 chain             | 3  |                                           | NLDIERPTYTNLNR                               | 215 | 14 | 17 | 62.25  | b2°b2b3b11y2y4*y4y5y7°y7y8°y8*y8y10*y10y14*y14                                  | 1718.86 | 52.575  | 137426 | 3 | 573.63  | -10.440 |
| [Q9NY65]TBA8_HUMAN Tubulin alpha-8 chain             | 4  |                                           | LISQIVSSITASLR                               | 229 | 14 | 7  | 54.36  | b4b5b6y4y5y8y14                                                                 | 1487.88 | 100.003 | 52439  | 2 | 744.44  | 1.887   |
| [Q9NY65]TBA8_HUMAN Tubulin alpha-8 chain             | 5  |                                           | FDGALNVDLTEFQTNLVPYPR                        | 243 | 21 | 7  | 33.99  | b2b17y2y4y5y6y21                                                                | 2409.22 | 94.857  | 48004  | 2 | 1205.11 | 5.675   |
| [Q9NY65]TBA8_HUMAN Tubulin alpha-8 chain             | 6  | Carbamidomethyl+C(8)                      | TIQFVDWCPTGFK                                | 339 | 13 | 6  | 27.21  | b3b7y4y7°y7y13                                                                  | 1598.77 | 83.302  | 38719  | 2 | 799.89  | 2.367   |
| [Q9NY65]TBA8_HUMAN Tubulin alpha-8 chain             | 7  |                                           | AVMIDLEPTVVDEVR                              | 64  | 15 | 5  | 39.17  | y2y4y6y9y11                                                                     | 1685.88 | 79.234  | 21995  | 2 | 843.44  | 2.607   |
| [Q9NY65]TBA8_HUMAN Tubulin alpha-8 chain             | 8  | Carbamidomethyl+C(15)                     | AYHEQLSVAEITSSCFEPNSQMVK                     | 280 | 24 | 4  | 21.14  | b12y12y13y24                                                                    | 2755.31 | 70.671  | 3819   | 3 | 919.11  | 14.620  |

|                                                  |    |                                                                               |                                               |     |    |    |        |                                                                      |         |         |       |   |         |         |
|--------------------------------------------------|----|-------------------------------------------------------------------------------|-----------------------------------------------|-----|----|----|--------|----------------------------------------------------------------------|---------|---------|-------|---|---------|---------|
| Q9NY65 TBA8_HUMAN Tubulin alpha-8 chain          | 9  |                                                                               | INDDDSFTTFFSETGNGK                            | 42  | 18 | 4  | 39.52  | y7y8y13y14                                                           | 1994.85 | 91.612  | 2998  | 3 | 665.62  | -3.427  |
| Q9NY65 TBA8_HUMAN Tubulin alpha-8 chain          | 10 |                                                                               | EDLAALEK                                      | 422 | 8  | 7  | 60.7   | b3b4°b4y5y6°y6y7                                                     | 888.47  | 35.001  | 27625 | 2 | 444.74  | 7.076   |
| Q9NY65 TBA8_HUMAN Tubulin alpha-8 chain          | 11 | Carbamidomethyl+C(3)                                                          | AVCMLSNTTAAIEAWAR                             | 373 | 17 | 5  | 31.08  | b5b7y5y6y12                                                          | 1864.92 | 79.480  | 5117  | 2 | 932.96  | 6.611   |
| Q9NY65 TBA8_HUMAN Tubulin alpha-8 chain          | 12 | Carbamidomethyl+C(2);<br>Carbamidomethyl+C(18)<br>;Carbamidomethyl+C(23)<br>) | ECISVHVQGQAGVQIGNACWELFC<br>LEHGIQADGTFDAQASK | 2   | 40 | 8  | 46.1   | b11°b11b12b15y7y8°y8y9                                               | 4403.09 | 135.244 | 2544  | 4 | 1101.53 | 12.975  |
| Q9NY65 TBA8_HUMAN Tubulin alpha-8 chain          | 13 |                                                                               | EDAANNYARGHYTVGK                              | 96  | 16 | 5  | 32.84  | y5y9y10y13*y13                                                       | 1765.81 | 71.819  | 87378 | 3 | 589.28  | -5.807  |
| Q9NY65 TBA8_HUMAN Tubulin alpha-8 chain          | 14 | Carbamidomethyl+C(15)<br>;Carbamidomethyl+C(25)<br>)                          | AYHEQLSVAEITSSCFEPNSQMVK<br>CDPR              | 280 | 28 | 9  | 39.34  | b7b9°b9y4y5y11°y11y12°y12                                            | 3283.44 | 81.249  | 8411  | 4 | 821.62  | -11.674 |
| Q9NY65 TBA8_HUMAN Tubulin alpha-8 chain          | 15 |                                                                               | AFVHWYVGGEMEEGFSEAREDL<br>AALEK               | 402 | 28 | 3  | 11.15  | b6b8y11                                                              | 3199.44 | 82.722  | 4831  | 4 | 800.62  | -7.783  |
| Q9NY65 TBA8_HUMAN Tubulin alpha-8 chain          | 16 | Carbamidomethyl+C(6)                                                          | KLTDACSLQGLFHFSGGGTGS<br>GFTSLLMER            | 123 | 33 | 4  | 14.64  | b5b7b10y9                                                            | 3491.72 | 104.230 | 1631  | 3 | 1164.58 | 2.587   |
| Q9NY65 TBA8_HUMAN Tubulin alpha-8 chain          | 17 | Phosphoryl STY(9)                                                             | GHYTVGKESIDLVLDR                              | 105 | 16 | 8  | 52.52  | b6b7°b7b8b11_HPO3<br>b11y8°y8y9                                      | 1881.90 | 41.777  | 1624  | 2 | 941.46  | 1.622   |
| Q9NY65 TBA8_HUMAN Tubulin alpha-8 chain          | 18 | Carbamidomethyl+C(5);<br>Oxidation+M(30)                                      | LTDACSLQGLFHFSGGGTGS<br>FTSLLMER              | 124 | 32 | 7  | 20.65  | b10b12b16°b16*b16b27y13                                              | 3379.62 | 91.378  | 9485  | 3 | 1127.21 | 2.239   |
| Q9NY65 TBA8_HUMAN Tubulin alpha-8 chain          | 19 | Carbamidomethyl+C(15)<br>;Oxidation+M(22)                                     | AYHEQLSVAEITSSCFEPNSQMVK                      | 280 | 24 | 9  | 31.17  | b7b8°b8*b8b13y5*y5y9y12                                              | 2771.28 | 89.674  | 7419  | 3 | 924.43  | 5.903   |
| P14618 KPYM_HUMAN Pyruvate kinase isozymes M1/M2 | 1  | Carbamidomethyl+C(6)                                                          | NTGHICTIGPASR                                 | 43  | 13 | 13 | 117.58 | b2°b2b3b4b5y4y5y6y7y8y9y1<br>0y13                                    | 1359.71 | 53.712  | 62290 | 2 | 680.36  | 0.359   |
| P14618 KPYM_HUMAN Pyruvate kinase isozymes M1/M2 | 2  |                                                                               | GDLGIEIPA EK                                  | 294 | 11 | 10 | 86.94  | b2b3b4b5b10y4y6y7y8y11                                               | 1141.61 | 60.016  | 58871 | 2 | 571.31  | -3.529  |
| P14618 KPYM_HUMAN Pyruvate kinase isozymes M1/M2 | 3  |                                                                               | ITLDNAYMEK                                    | 141 | 10 | 7  | 54.67  | b8y2y6y7y8y9y10                                                      | 1197.58 | 52.777  | 57528 | 2 | 599.29  | -1.325  |
| P14618 KPYM_HUMAN Pyruvate kinase isozymes M1/M2 | 4  |                                                                               | GADFLVTEVENGGSLGSK                            | 188 | 18 | 22 | 131.78 | b3b4b5°b5b6b11y2°y2y3y6y8°<br>y8*y8y9y10y11*y11y12y13°y<br>13*y13y18 | 1779.88 | 73.871  | 50596 | 2 | 890.45  | 4.458   |
| P14618 KPYM_HUMAN Pyruvate kinase isozymes M1/M2 | 5  |                                                                               | APIIAVTR                                      | 447 | 8  | 5  | 31.02  | b2b3y3y4y8                                                           | 840.52  | 45.031  | 41906 | 2 | 420.77  | -8.641  |
| P14618 KPYM_HUMAN Pyruvate kinase isozymes M1/M2 | 6  | Carbamidomethyl+C(7)                                                          | GIFPVLCKDPVQEAWAEDVDLR                        | 467 | 22 | 13 | 68.39  | b2y2y5y6°y6y7°y7y8°y8y9y11<br>°y11y19                                | 2557.27 | 90.342  | 34660 | 3 | 853.10  | -1.146  |
| P14618 KPYM_HUMAN Pyruvate kinase isozymes M1/M2 | 7  |                                                                               | FGVEQDQDMVFASFIRK                             | 230 | 17 | 5  | 27.76  | b2b6b14y15y16                                                        | 1987.98 | 104.941 | 25413 | 3 | 663.33  | -7.553  |
| P14618 KPYM_HUMAN Pyruvate kinase isozymes M1/M2 | 8  |                                                                               | SVETLK                                        | 56  | 6  | 4  | 25.39  | b3°b3y3°y3                                                           | 676.39  | 38.535  | 53823 | 1 | 676.39  | 1.624   |
| P14618 KPYM_HUMAN Pyruvate kinase isozymes M1/M2 | 9  | Carbamidomethyl+C(7)                                                          | AGKPVICATQMLESNIK                             | 319 | 17 | 12 | 62.34  | b3b5b13°b13y4y5°y5y7y11°y1<br>1y12*y12                               | 1876.96 | 88.515  | 49977 | 3 | 626.32  | -5.008  |
| P14618 KPYM_HUMAN Pyruvate kinase isozymes M1/M2 | 10 |                                                                               | VVPVP                                         | 526 | 5  | 2  | 24.91  | b3y3                                                                 | 510.33  | 46.165  | 42255 | 1 | 510.33  | 7.056   |
| P14618 KPYM_HUMAN Pyruvate kinase isozymes M1/M2 | 11 |                                                                               | VNFAMNVGK                                     | 489 | 9  | 3  | 36.27  | y5y6y8                                                               | 979.50  | 51.624  | 34745 | 2 | 490.25  | -0.997  |
| P14618 KPYM_HUMAN Pyruvate kinase isozymes M1/M2 | 12 |                                                                               | DPVQEAWAEDVDLR                                | 475 | 14 | 3  | 17.67  | b4b8y11                                                              | 1642.76 | 62.721  | 19081 | 3 | 548.26  | -8.025  |
| P14618 KPYM_HUMAN Pyruvate kinase isozymes M1/M2 | 13 |                                                                               | TGLIK                                         | 120 | 5  | 1  | 12.45  | b4                                                                   | 531.35  | 43.540  | 18075 | 1 | 531.35  | 1.723   |
| P14618 KPYM_HUMAN Pyruvate kinase isozymes M1/M2 | 14 |                                                                               | GVNLPGAAVDLPVSEK                              | 207 | 17 | 7  | 52.21  | b3y3y6°y6y8y10y13                                                    | 1636.90 | 69.676  | 15665 | 2 | 818.95  | 4.773   |
| P14618 KPYM_HUMAN Pyruvate kinase isozymes M1/M2 | 15 |                                                                               | LNFSHGTHEYHAETIK                              | 73  | 16 | 6  | 23.4   | b9°b9°b9b11°b11b14                                                   | 1883.88 | 76.256  | 9656  | 2 | 942.45  | -10.497 |

|                                                  |    |                       |                                        |     |    |    |        |                                                         |         |         |        |   |         |         |
|--------------------------------------------------|----|-----------------------|----------------------------------------|-----|----|----|--------|---------------------------------------------------------|---------|---------|--------|---|---------|---------|
| P14618 KPYM_HUMAN Pyruvate kinase isozymes M1/M2 | 16 |                       | MQHLIAR                                | 376 | 7  | 3  | 35.31  | b5y3y4                                                  | 868.47  | 29.633  | 5857   | 2 | 434.74  | -15.531 |
| P14618 KPYM_HUMAN Pyruvate kinase isozymes M1/M2 | 17 | Carbamidomethyl+C(31) | MSKPHSEAGTAFIQTQLHAAMA<br>DTFLEHMCR    | 0   | 32 | 7  | 48.03  | b3b4b7b13°b13b14b15                                     | 3644.65 | 67.066  | 2842   | 3 | 1215.55 | -11.187 |
| P14618 KPYM_HUMAN Pyruvate kinase isozymes M1/M2 | 18 |                       | FGVEQDQDVMVFASFIR                      | 230 | 16 | 3  | 15.7   | b4b12y12                                                | 1859.88 | 68.669  | 2339   | 2 | 930.45  | -8.926  |
| P14618 KPYM_HUMAN Pyruvate kinase isozymes M1/M2 | 19 |                       | FDEILEASDGIMVAR                        | 279 | 15 | 3  | 22.62  | b4b5y3                                                  | 1665.78 | 49.724  | 1535   | 2 | 833.39  | -21.837 |
| P14618 KPYM_HUMAN Pyruvate kinase isozymes M1/M2 | 20 | Carbamidomethyl+C(7)  | GIFPVLCCKDPVQEAWAEDVDLR                | 467 | 22 | 5  | 48.5   | y7y8y9y10y13                                            | 2557.24 | 121.428 | 445563 | 3 | 853.09  | -13.270 |
| P14618 KPYM_HUMAN Pyruvate kinase isozymes M1/M2 | 21 |                       | TATESFASDPILYRPVAVALDTKG<br>PEIR       | 92  | 28 | 5  | 18.44  | b5b17y14y19y21                                          | 3017.56 | 81.473  | 186013 | 4 | 755.15  | -9.871  |
| P14618 KPYM_HUMAN Pyruvate kinase isozymes M1/M2 | 22 | Carbamidomethyl+C(16) | AEGSDVANAVLDGADCIMLSGET<br>AKGDYPLEAVR | 342 | 34 | 8  | 45.81  | b5b6y3y6y14y16y24y25                                    | 3494.65 | 94.749  | 56370  | 3 | 1165.56 | 3.633   |
| P14618 KPYM_HUMAN Pyruvate kinase isozymes M1/M2 | 23 |                       | KGDVVIVLTGWRPGSGFTNTMR                 | 504 | 22 | 5  | 23.06  | b3b5y3y8y10                                             | 2391.25 | 78.806  | 50777  | 3 | 797.76  | -3.369  |
| P14618 KPYM_HUMAN Pyruvate kinase isozymes M1/M2 | 24 |                       | KGVNLPGAADVLPVASEK                     | 206 | 18 | 6  | 39.54  | b5b9y3y6y8y13                                           | 1764.97 | 63.736  | 50529  | 3 | 588.99  | -10.098 |
| P14618 KPYM_HUMAN Pyruvate kinase isozymes M1/M2 | 25 |                       | GADFLVTEVENGGSLGSKK                    | 188 | 19 | 3  | 13.7   | b12b16y13                                               | 1907.96 | 68.590  | 23960  | 3 | 636.66  | -4.095  |
| P14618 KPYM_HUMAN Pyruvate kinase isozymes M1/M2 | 26 |                       | GSQTAEVELKK                            | 125 | 11 | 7  | 80.05  | b3b4y3y4y5y6y7                                          | 1118.60 | 26.507  | 19366  | 2 | 559.81  | -1.528  |
| P14618 KPYM_HUMAN Pyruvate kinase isozymes M1/M2 | 27 |                       | EMIKSGMNVAR                            | 62  | 11 | 4  | 38.89  | b8b9b10y7                                               | 1235.61 | 41.353  | 7456   | 2 | 618.31  | -14.226 |
| P14618 KPYM_HUMAN Pyruvate kinase isozymes M1/M2 | 28 |                       | NVRTATESFASDPILYRPVAVALD<br>TK         | 89  | 26 | 4  | 26.01  | b8b9b12b16                                              | 2834.47 | 111.986 | 2406   | 3 | 945.49  | -12.834 |
| P14618 KPYM_HUMAN Pyruvate kinase isozymes M1/M2 | 29 | Phosphoryl STY(7)     | EAEAAIYHLQLFEELR                       | 383 | 16 | 5  | 32.44  | b6b11_H3PO4 b11b12y5y11                                 | 2011.96 | 65.853  | 13144  | 3 | 671.32  | 7.402   |
| P14618 KPYM_HUMAN Pyruvate kinase isozymes M1/M2 | 30 | Oxidation+M(5)        | VNFAMNVGK                              | 489 | 9  | 8  | 56.4   | b4*b4b8y4*y4y7*y7y8                                     | 995.51  | 41.833  | 1706   | 2 | 498.26  | 7.296   |
| Q15404 RSU1_HUMAN Ras suppressor protein 1       | 1  |                       | AENNPWVTPIADQFQLGVSHVFE<br>YIR         | 212 | 26 | 17 | 118.15 | b2b4b5*b5b7b8y3y5y6y8y10y<br>11y13y18y19y22y26          | 3030.51 | 113.186 | 57194  | 3 | 1010.84 | -0.161  |
| Q15404 RSU1_HUMAN Ras suppressor protein 1       | 2  |                       | NLEVLNFFNNQIEELPTQISSLQK               | 63  | 24 | 20 | 84.37  | b2*b2b3b4*b4b6*b6b9b10y2*<br>y2y3y4y5y6y9y12*y12*y12y24 | 2818.46 | 108.778 | 34638  | 3 | 940.16  | -1.646  |
| Q15404 RSU1_HUMAN Ras suppressor protein 1       | 3  |                       | GISNMLDVNGLFTLSHITQLVLSH<br>NK         | 25  | 26 | 5  | 19.7   | b5b9b12y5y11                                            | 2851.47 | 112.928 | 37215  | 4 | 713.62  | -15.154 |
| Q15404 RSU1_HUMAN Ras suppressor protein 1       | 4  |                       | GFGSLPALEVLDTYNNLSENSLP<br>GNFFYLTTLR  | 103 | 34 | 9  | 35.25  | b4*b4b5*b5y4y6y11°y11y12                                | 3775.92 | 134.277 | 20959  | 3 | 1259.31 | -1.681  |
| Q15404 RSU1_HUMAN Ras suppressor protein 1       | 5  |                       | HLNLMGMR                               | 89  | 8  | 3  | 31.02  | b6b7y4                                                  | 954.48  | 64.403  | 5926   | 2 | 477.75  | -9.400  |
| Q15404 RSU1_HUMAN Ras suppressor protein 1       | 6  |                       | LNTLPR                                 | 97  | 6  | 2  | 25.39  | y4y5                                                    | 713.43  | 31.489  | 5833   | 2 | 357.22  | -6.502  |
| Q15404 RSU1_HUMAN Ras suppressor protein 1       | 7  |                       | SETYK                                  | 238 | 5  | 4  | 37.36  | b3y3°y3y4                                               | 627.30  | 80.118  | 5240   | 1 | 627.30  | 8.465   |
| Q15404 RSU1_HUMAN Ras suppressor protein 1       | 8  |                       | ALYLSDNDFEILPPDIGK                     | 137 | 18 | 6  | 14.27  | b11°b11*b11b14y12*y12                                   | 2020.02 | 65.797  | 2106   | 2 | 1010.51 | -3.565  |
| Q15404 RSU1_HUMAN Ras suppressor protein 1       | 9  |                       | HMQANPEPPK                             | 248 | 10 | 9  | 68.09  | b4b5b6*b6b7y6*y6y7*y7                                   | 1148.57 | 34.967  | 1696   | 2 | 574.79  | 13.710  |
| Q15404 RSU1_HUMAN Ras suppressor protein 1       | 10 |                       | EKNQPEVDMSDR                           | 13  | 12 | 6  | 43.87  | b5b8y3y8y11°y11                                         | 1447.66 | 44.140  | 2391   | 2 | 724.34  | 11.215  |
| Q15404 RSU1_HUMAN Ras suppressor protein 1       | 11 |                       | YLYGRHMQANPEPPK                        | 243 | 15 | 4  | 22.62  | b13y10°y10y11                                           | 1800.88 | 65.831  | 2337   | 3 | 600.97  | -2.305  |
| Q15404 RSU1_HUMAN Ras suppressor protein 1       | 12 | Phosphoryl STY(6)     | EIGELTQLKELHIQGNR                      | 174 | 17 | 5  | 29.83  | b4b13y3y8y12                                            | 2058.05 | 97.158  | 3293   | 3 | 686.69  | 11.270  |
| Q15404 RSU1_HUMAN Ras suppressor protein 1       | 13 | Oxidation+M(5)        | GISNMLDVNGLFTLSHITQLVLSH<br>NK         | 25  | 26 | 5  | 11.43  | b9b11y4°y4*y4                                           | 2867.47 | 112.958 | 4286   | 4 | 717.62  | -11.749 |

|                                                    |    |                      |                             |      |    |    |        |                                                                                                               |         |        |         |   |         |         |
|----------------------------------------------------|----|----------------------|-----------------------------|------|----|----|--------|---------------------------------------------------------------------------------------------------------------|---------|--------|---------|---|---------|---------|
| P23528 COF1_HUMAN Cofilin-1                        | 1  |                      | KEDLVFIFWAPESAPLK           | 95   | 17 | 11 | 74.84  | b2°b2b4b5b6b7y3y7y9y12y17                                                                                     | 1990.05 | 97.556 | 213128  | 3 | 664.02  | -7.177  |
| P23528 COF1_HUMAN Cofilin-1                        | 2  |                      | EILVGDVGQTVDDPYATFVK        | 53   | 20 | 24 | 147.51 | b2°b2b3°b3b4°b4b6°b6b16°b16b17y1y2y3y4y5y7y8y10y11y12y15y16y20                                                | 2166.10 | 81.253 | 151551  | 2 | 1083.55 | 2.705   |
| P23528 COF1_HUMAN Cofilin-1                        | 3  |                      | YALYDATYETK                 | 81   | 11 | 10 | 77.04  | b1b2b3b9y4y5y7y8y9y11                                                                                         | 1337.63 | 52.557 | 133669  | 2 | 669.32  | 0.274   |
| P23528 COF1_HUMAN Cofilin-1                        | 4  |                      | NIILEEGK                    | 45   | 8  | 6  | 38.8   | y2y3°y3y5y6y8                                                                                                 | 915.51  | 44.407 | 66094   | 2 | 458.26  | -4.933  |
| P23528 COF1_HUMAN Cofilin-1                        | 5  |                      | YALYDATYETKESK              | 81   | 14 | 9  | 55.24  | b7b8y6y7°y7y8°y8y11y14                                                                                        | 1681.81 | 36.577 | 3063    | 2 | 841.41  | 7.839   |
| P23528 COF1_HUMAN Cofilin-1                        | 6  |                      | MIYASSKDAIK                 | 114  | 11 | 7  | 35.7   | b2b4b8°b8y2y3y4                                                                                               | 1226.65 | 31.591 | 2500    | 3 | 409.56  | 6.966   |
| P23528 COF1_HUMAN Cofilin-1                        | 7  |                      | ASGVAVSDGVIKVFNDMK          | 1    | 18 | 3  | 14.27  | b3b10y6                                                                                                       | 1836.94 | 57.950 | 19069   | 2 | 918.97  | -9.171  |
| P23528 COF1_HUMAN Cofilin-1                        | 8  | Carbamidomethyl+C(7) | MLPDKDCR                    | 73   | 8  | 4  | 46.48  | b4y4y5y6                                                                                                      | 1034.48 | 21.868 | 11776   | 2 | 517.74  | 2.832   |
| P23528 COF1_HUMAN Cofilin-1                        | 9  | Carbamidomethyl+C(2) | DCRYALYDATYETK              | 78   | 14 | 8  | 73.73  | b3b6b11y3y8y9y12y13                                                                                           | 1768.79 | 92.515 | 11236   | 3 | 590.27  | 0.552   |
| P23528 COF1_HUMAN Cofilin-1                        | 10 | Carbamidomethyl+C(3) | DRCTLAEK                    | 144  | 8  | 5  | 45.23  | b4b5y6°y6y7                                                                                                   | 992.47  | 26.547 | 6113    | 2 | 496.74  | -12.484 |
| P23528 COF1_HUMAN Cofilin-1                        | 11 | Carbamidomethyl+C(7) | HELQANCYEEVKDR              | 132  | 14 | 4  | 42.37  | y6y7y9y10                                                                                                     | 1790.82 | 33.173 | 4673    | 2 | 895.91  | 2.249   |
| P23528 COF1_HUMAN Cofilin-1                        | 12 |                      | YALYDATYETKESK              | 81   | 14 | 3  | 17.67  | b3y8y10                                                                                                       | 1681.79 | 34.953 | 2278    | 3 | 561.27  | -3.847  |
| P23528 COF1_HUMAN Cofilin-1                        | 13 | Oxidation+M(1)       | MASGVAVSDGVIK               | 0    | 13 | 4  | 23.72  | b5y4y5°y5                                                                                                     | 1249.63 | 69.714 | 3096    | 3 | 417.22  | -10.159 |
| P23528 COF1_HUMAN Cofilin-1                        | 14 |                      | PESAPLK                     | 105  | 7  | 1  | 7.42   | b6                                                                                                            | 741.41  | 97.587 | 5900    | 1 | 741.41  | -8.809  |
| P23528 COF1_HUMAN Cofilin-1                        | 15 |                      | GDVGQTVDDPYATFVK            | 57   | 16 | 5  | 20     | b6°b6b12b15°b15                                                                                               | 1711.80 | 81.197 | 4977    | 2 | 856.41  | -8.557  |
| P23528 COF1_HUMAN Cofilin-1                        | 16 |                      | EILVGDVGQTVDD               | 53   | 13 | 1  | 7.9    | y7                                                                                                            | 1359.65 | 81.212 | 3247    | 2 | 680.33  | -7.272  |
| P23528 COF1_HUMAN Cofilin-1                        | 17 |                      | EILVGDVGQTVDDPYATFVK        | 53   | 20 | 0  | 7.2    |                                                                                                               | 2148.09 | 81.247 | 2977    | 3 | 716.70  | 5.683   |
| A5A3E0 A26CB_HUMAN ANKRD26-like family C member 1B | 1  |                      | AGFAGDDAPR                  | 718  | 10 | 21 | 139.38 | b1b2b3b4b7°b7b8y1y2y3y4°y4y5y6°y6y7°y7y8y9°y9y10                                                              | 976.44  | 30.905 | 1848250 | 2 | 488.73  | -5.126  |
| A5A3E0 A26CB_HUMAN ANKRD26-like family C member 1B | 2  |                      | SYELPDGQVITIGNER            | 938  | 16 | 39 | 218.65 | b2b3°b3b4°b4b5°b5b8°b8b9°b9b10b12°b12b13y1y2°y2y4°y4*y4y5°y5y6°y6*y6y7°y7y8y10*y10y11°y11y12°y12*y12y13y14y16 | 1790.88 | 71.814 | 1483661 | 2 | 895.94  | -5.589  |
| A5A3E0 A26CB_HUMAN ANKRD26-like family C member 1B | 3  |                      | AVFPSIVGRPR                 | 728  | 11 | 15 | 104.96 | b1b2b3b9y1y2y3y4y5y6y7y8°y8y9y11                                                                              | 1198.70 | 55.696 | 666000  | 2 | 599.85  | -3.666  |
| A5A3E0 A26CB_HUMAN ANKRD26-like family C member 1B | 4  |                      | QEYDESGPSIVHRK              | 1059 | 14 | 17 | 131.76 | b4°b4°b4y2y3y4y5y6y7y8y9y10°y10y11y12y14*y14                                                                  | 1644.78 | 31.699 | 325281  | 3 | 548.93  | -9.797  |
| A5A3E0 A26CB_HUMAN ANKRD26-like family C member 1B | 5  |                      | QEYDESGPSIVHR               | 1059 | 13 | 10 | 88     | y3y4y5y6y8y10°y10y11y13*y13                                                                                   | 1516.69 | 37.635 | 152198  | 3 | 506.23  | -9.417  |
| A5A3E0 A26CB_HUMAN ANKRD26-like family C member 1B | 6  |                      | ISSENSNPEQDLK               | 367  | 13 | 5  | 26.43  | y4y9*y9y10*y10                                                                                                | 1460.68 | 54.009 | 12942   | 3 | 487.56  | -5.014  |
| A5A3E0 A26CB_HUMAN ANKRD26-like family C member 1B | 7  |                      | DLYTNTVLSGGTTMYPGMAHR       | 991  | 21 | 4  | 19.43  | b4b8b12°b12                                                                                                   | 2285.10 | 83.869 | 7623    | 3 | 762.37  | 14.424  |
| A5A3E0 A26CB_HUMAN ANKRD26-like family C member 1B | 8  |                      | EVEEEMKK                    | 413  | 8  | 8  | 31.02  | b1b5°b5y2y6y7°y7y8                                                                                            | 1021.47 | 34.946 | 3018    | 2 | 511.24  | -12.130 |
| A5A3E0 A26CB_HUMAN ANKRD26-like family C member 1B | 9  |                      | ELENFMAIEEMKK               | 531  | 13 | 5  | 46.66  | y7y8y9y10*y10                                                                                                 | 1611.79 | 55.165 | 2829    | 2 | 806.40  | 11.361  |
| A5A3E0 A26CB_HUMAN ANKRD26-like family C member 1B | 10 |                      | STHVGFPENLTNGATAGNGDDGLIPPR | 546  | 27 | 3  | 21.28  | b6y11y12                                                                                                      | 2707.30 | 40.075 | 25236   | 4 | 677.58  | -2.345  |

|                                                    |    |                                                                                                 |                                  |     |    |    |       |                                         |         |         |        |   |         |         |
|----------------------------------------------------|----|-------------------------------------------------------------------------------------------------|----------------------------------|-----|----|----|-------|-----------------------------------------|---------|---------|--------|---|---------|---------|
| A5A3E0 A26CB_HUMAN ANKRD26-like family C member 1B | 11 | Carbamidomethyl+C(2)                                                                            | LCYVALDFEQEMATVASSSSLEK          | 915 | 23 | 3  | 18.52 | y6y8y11                                 | 2578.25 | 117.246 | 11627  | 3 | 860.09  | 17.424  |
| A5A3E0 A26CB_HUMAN ANKRD26-like family C member 1B | 12 |                                                                                                 | LLLDR                            | 190 | 5  | 1  | 12.45 | y4                                      | 629.41  | 50.405  | 7046   | 1 | 629.41  | 13.673  |
| A5A3E0 A26CB_HUMAN ANKRD26-like family C member 1B | 13 |                                                                                                 | ELPDYLMKILTEHGYR                 | 883 | 16 | 3  | 15.7  | b4b7y4                                  | 1978.00 | 57.956  | 26092  | 2 | 989.51  | -2.777  |
| A5A3E0 A26CB_HUMAN ANKRD26-like family C member 1B | 14 | Carbamidomethyl+C(2);<br>Carbamidomethyl+C(5);<br>Carbamidomethyl+C(8);<br>Carbamidomethyl+C(9) | WCRHCFPCR                        | 63  | 10 | 4  | 40.17 | b6b7y3y4                                | 1538.59 | 25.577  | 17162  | 2 | 769.80  | -6.188  |
| A5A3E0 A26CB_HUMAN ANKRD26-like family C member 1B | 15 |                                                                                                 | ISSENSNPEQDLKLTSEESQR            | 367 | 22 | 3  | 12.43 | b4y8y13                                 | 2520.20 | 68.016  | 1637   | 3 | 840.74  | 12.981  |
| A5A3E0 A26CB_HUMAN ANKRD26-like family C member 1B | 16 | Carbamidomethyl+C(1);<br>Carbamidomethyl+C(9);<br>Carbamidomethyl+C(16)<br>;Phosphoryl STY()    | CPEALFQPCFLGMESCGIHETTFN<br>SIMK | 956 | 28 | 9  | 59.2  | b3b4b5b7*b7y4y5*y5y6                    | 3384.40 | 101.594 | 19111  | 3 | 1128.80 | -5.771  |
| A5A3E0 A26CB_HUMAN ANKRD26-like family C member 1B | 17 | Oxidation+M()                                                                                   | SNVGASGDHDDSAMK                  | 77  | 15 | 15 | 75.76 | b3*b3b4*b4*b4b9b14*b14y5y6*y6y7*y7y8*y8 | 1506.60 | 25.560  | 210842 | 2 | 753.80  | -10.776 |
| A5A3E0 A26CB_HUMAN ANKRD26-like family C member 1B | 18 | Oxidation+M()                                                                                   | SQEPEINKDGDRELENFMAIEEMK         | 519 | 24 | 3  | 22.14 | y3y4y9                                  | 2868.31 | 94.506  | 38691  | 3 | 956.78  | 3.234   |
| A5A3E0 A26CB_HUMAN ANKRD26-like family C member 1B | 19 | Oxidation+M(1)                                                                                  | MVVEVDSMPAASSVK                  | 0   | 15 | 3  | 16.6  | b4b9y12                                 | 1565.77 | 73.790  | 3866   | 2 | 783.39  | 9.356   |
| A5A3E0 A26CB_HUMAN ANKRD26-like family C member 1B | 20 |                                                                                                 | ISSENSNPE                        | 367 | 9  | 0  | 3.84  |                                         | 976.44  | 54.062  | 11114  | 2 | 488.72  | 13.815  |
| A5A3E0 A26CB_HUMAN ANKRD26-like family C member 1B | 21 |                                                                                                 | ENSNPEQDLK                       | 370 | 10 | 0  | 3.84  |                                         | 1173.53 | 53.972  | 4209   | 2 | 587.27  | -4.889  |
| P07951 TPM2_HUMAN Tropomyosin beta chain           | 1  |                                                                                                 | IQLVEELDR                        | 91  | 10 | 16 | 95.04 | b2*b2b3y1y2y3y4*y4y5*y5y6y7y8y9*y9y10   | 1243.65 | 59.102  | 271670 | 2 | 622.33  | -2.454  |
| P07951 TPM2_HUMAN Tropomyosin beta chain           | 2  |                                                                                                 | LATALQK                          | 105 | 7  | 10 | 60.22 | b4*b4y3y4y5*y5y6*y6y7*y7                | 744.45  | 28.648  | 24903  | 2 | 372.73  | -9.264  |
| P07951 TPM2_HUMAN Tropomyosin beta chain           | 3  |                                                                                                 | QLEEEQALQK                       | 37  | 11 | 10 | 60.79 | b2*b2b7b8b9y6*y6y9*y9y10                | 1343.67 | 41.802  | 3539   | 2 | 672.34  | -7.904  |
| P07951 TPM2_HUMAN Tropomyosin beta chain           | 4  |                                                                                                 | TIDDLEDEVYAQK                    | 251 | 13 | 3  | 18.95 | b3b11y8                                 | 1538.73 | 57.962  | 1841   | 3 | 513.58  | 3.094   |
| P07951 TPM2_HUMAN Tropomyosin beta chain           | 5  |                                                                                                 | SLEAQADK                         | 205 | 8  | 4  | 51.25 | b4b7y3y5                                | 861.43  | 29.809  | 26620  | 1 | 861.43  | -0.354  |
| P07951 TPM2_HUMAN Tropomyosin beta chain           | 6  |                                                                                                 | EAQEKLEQAEK                      | 65  | 11 | 3  | 22.46 | b5b10y6                                 | 1302.67 | 73.919  | 6664   | 2 | 651.84  | 10.121  |
| P07951 TPM2_HUMAN Tropomyosin beta chain           | 7  |                                                                                                 | KATDAEADVASLNR                   | 76  | 14 | 5  | 39.36 | b4b10b11*b11b12                         | 1460.75 | 62.851  | 5206   | 2 | 730.88  | 13.371  |
| P07951 TPM2_HUMAN Tropomyosin beta chain           | 8  |                                                                                                 | SLEAQADKYSTK                     | 205 | 12 | 7  | 20.51 | b6*b6*b6y6y9*y9*y9                      | 1340.67 | 36.605  | 2535   | 3 | 447.56  | 1.275   |
| P07951 TPM2_HUMAN Tropomyosin beta chain           | 9  | Oxidation+M()                                                                                   | MELQEMQLKEAK                     | 140 | 12 | 5  | 27.71 | b4*b4b9b10*b10                          | 1493.73 | 105.723 | 4847   | 2 | 747.37  | -0.572  |
| Q9H4B7 TBB1_HUMAN Tubulin beta-1 chain             | 1  |                                                                                                 | AVLVDLEPGTMSIR                   | 62  | 15 | 11 | 68.96 | b3b15y3y8*y8y9*y9y10y11y12y15           | 1615.84 | 74.759  | 269953 | 2 | 808.42  | 0.907   |



|                                             |    |                                               |                                          |     |    |    |        |                                                                                   |         |         |        |   |         |         |
|---------------------------------------------|----|-----------------------------------------------|------------------------------------------|-----|----|----|--------|-----------------------------------------------------------------------------------|---------|---------|--------|---|---------|---------|
| Q9H4B7 TBB1_HUMAN Tubulin beta-1 chain      | 2  |                                               | LGALFQPDSFVHGNSGAGNNWA<br>K              | 80  | 23 | 15 | 53.35  | b3b4b6b10*b10*b10y2y6y9*y<br>9y11y12y17*y17y23                                    | 2387.14 | 74.629  | 232426 | 3 | 796.39  | -3.886  |
| Q9H4B7 TBB1_HUMAN Tubulin beta-1 chain      | 3  |                                               | LAVNMVPPFR                               | 252 | 10 | 8  | 77.12  | b2y4y5y6y7y8y9y10                                                                 | 1143.63 | 72.778  | 168761 | 2 | 572.32  | -4.483  |
| Q9H4B7 TBB1_HUMAN Tubulin beta-1 chain      | 4  |                                               | LHFFMPGFAPLTAQGSQQYR                     | 262 | 20 | 28 | 176.65 | b2b3b4b5b7b9b12y2y3*y3y4*<br>y4y5*y5y6y7*y7y8y9*y9y10*y<br>10y11y14*y14*y14y15y20 | 2296.13 | 88.502  | 122881 | 3 | 766.05  | -1.701  |
| Q9H4B7 TBB1_HUMAN Tubulin beta-1 chain      | 5  |                                               | ALSVAELTQMFDAR                           | 282 | 15 | 23 | 175.58 | b1b4*b4b5b11*b11b12b13b14<br>y2y3y4y5y6*y6y7y8*y8y10*y1<br>0y12y13y15             | 1679.84 | 92.256  | 107915 | 2 | 840.43  | 1.453   |
| Q9H4B7 TBB1_HUMAN Tubulin beta-1 chain      | 6  |                                               | IMNSFSVMPSPK                             | 162 | 12 | 9  | 75.07  | b2y5y7y8y9y10*y10y11y12                                                           | 1337.66 | 63.531  | 95242  | 2 | 669.33  | 1.186   |
| Q9H4B7 TBB1_HUMAN Tubulin beta-1 chain      | 7  | Carbamidomethyl+C(6);<br>Carbamidomethyl+C(8) | HESESCDCLQGFIQVHSLGGGTGS<br>GMGTLLMNK    | 121 | 33 | 16 | 74.56  | b2b3b4y1y2y3y4y7*y7y8y14*<br>y14y15y16*y16y33                                     | 3507.56 | 82.703  | 87845  | 4 | 877.64  | -5.708  |
| Q9H4B7 TBB1_HUMAN Tubulin beta-1 chain      | 8  | Carbamidomethyl+C(4)                          | NSSCFVEWIPNNVK                           | 336 | 14 | 6  | 25.19  | b1b8b11y5y11y14                                                                   | 1693.80 | 75.451  | 68319  | 2 | 847.41  | 2.595   |
| Q9H4B7 TBB1_HUMAN Tubulin beta-1 chain      | 9  |                                               | GHYTEGAELIENVLEVVR                       | 103 | 18 | 10 | 63.77  | b2b3b7b9b10y2y4y5y7y8                                                             | 2028.03 | 99.522  | 67077  | 3 | 676.68  | -6.441  |
| Q9H4B7 TBB1_HUMAN Tubulin beta-1 chain      | 10 |                                               | GASALQLER                                | 37  | 9  | 4  | 36.27  | y3y4y7y9                                                                          | 944.51  | 40.958  | 57762  | 2 | 472.76  | -1.357  |
| Q9H4B7 TBB1_HUMAN Tubulin beta-1 chain      | 11 |                                               | LTTPTYGDLNHLVSLTMSGITSL<br>R             | 216 | 25 | 12 | 83.94  | b2*b2y3y4y5y7y8y9y10y12y2<br>3y25                                                 | 2691.40 | 107.457 | 50141  | 3 | 897.80  | -0.816  |
| Q9H4B7 TBB1_HUMAN Tubulin beta-1 chain      | 12 |                                               | EVDQQLLSVQTR                             | 324 | 12 | 9  | 61.85  | b6y2y3*y3y4y5y6y10y12                                                             | 1415.75 | 52.689  | 46267  | 2 | 708.38  | 0.172   |
| Q9H4B7 TBB1_HUMAN Tubulin beta-1 chain      | 13 |                                               | GLSMAATFIGNNTAIQEIFNR                    | 359 | 21 | 5  | 12.79  | b13b16*b16y6y21                                                                   | 2268.13 | 100.564 | 22663  | 3 | 756.72  | -4.951  |
| Q9H4B7 TBB1_HUMAN Tubulin beta-1 chain      | 14 |                                               | IREEYPDR                                 | 154 | 8  | 7  | 51.25  | b2b4b7y1y3y6y8                                                                    | 1077.54 | 25.047  | 19158  | 2 | 539.27  | 3.285   |
| Q9H4B7 TBB1_HUMAN Tubulin beta-1 chain      | 15 |                                               | VSEHFSAMFK                               | 380 | 10 | 6  | 40.45  | b4b5*b5b6*b6y3                                                                    | 1182.56 | 27.376  | 10682  | 3 | 394.86  | -4.748  |
| Q9H4B7 TBB1_HUMAN Tubulin beta-1 chain      | 16 |                                               | ISVYYNEAYGR                              | 46  | 11 | 7  | 65.56  | b6b7b8y3y7*y7y10                                                                  | 1334.63 | 36.637  | 8085   | 2 | 667.82  | -2.927  |
| Q9H4B7 TBB1_HUMAN Tubulin beta-1 chain      | 17 |                                               | AFVHWYTSEGMDINEFGAENNI<br>HDLVSEYQQFQDAK | 392 | 37 | 11 | 25.9   | b23y4*y4*y4y5*y5*y5y7*y7y1<br>0y12                                                | 4361.97 | 88.580  | 5731   | 3 | 1454.66 | 8.284   |
| Q9H4B7 TBB1_HUMAN Tubulin beta-1 chain      | 18 |                                               | LTTPTYGDLNHLVSLTMSGITSL<br>RFPGQLNADLR   | 216 | 35 | 15 | 45.12  | b8b12*b12*b12b13*b13b14b1<br>7*b17*b17y5*y5y15y18y32                              | 3802.95 | 116.300 | 32678  | 4 | 951.49  | -8.217  |
| Q9H4B7 TBB1_HUMAN Tubulin beta-1 chain      | 19 |                                               | GASALQLERISVYYNEAYGR                     | 37  | 20 | 5  | 25.31  | b5b19y7y11y13                                                                     | 2260.15 | 69.408  | 9378   | 4 | 565.79  | 5.617   |
| Q9H4B7 TBB1_HUMAN Tubulin beta-1 chain      | 20 | Carbamidomethyl+C(4)                          | VAVCDIPRGLSMAATFIGNNTAI<br>QEIFNR        | 350 | 30 | 4  | 20.8   | b4b14b15y13                                                                       | 3275.69 | 136.587 | 7708   | 2 | 1638.35 | 7.230   |
| Q9H4B7 TBB1_HUMAN Tubulin beta-1 chain      | 21 | Phosphoryl STY(12)                            | MSTKEVDQQLSVQTR                          | 320 | 16 | 6  | 25.44  | b8b11b13y11*y11*y11                                                               | 1942.94 | 79.378  | 30740  | 3 | 648.32  | 9.990   |
| Q9H4B7 TBB1_HUMAN Tubulin beta-1 chain      | 22 | Oxidation+M(5)                                | LHFFMPGFAPLTAQGSQQYR                     | 262 | 20 | 4  | 13.21  | b12y4*y4y9                                                                        | 2312.11 | 100.524 | 3261   | 3 | 771.37  | -8.342  |
| Q9H4B7 TBB1_HUMAN Tubulin beta-1 chain      | 23 | Oxidation+M(8)                                | VSEHFSAMFK                               | 380 | 10 | 5  | 38.41  | b3b8y8*y8y9                                                                       | 1198.56 | 32.579  | 1524   | 2 | 599.78  | 0.815   |
| Q9H4B7 TBB1_HUMAN Tubulin beta-1 chain      | 24 |                                               | SALQLER                                  | 39  | 7  | 0  | 1.92   |                                                                                   | 816.45  | 40.948  | 1725   | 1 | 816.45  | -5.607  |
| Q9H4B7 TBB1_HUMAN Tubulin beta-1 chain      | 25 |                                               | GASALQLER                                | 37  | 9  | 0  | 1.92   |                                                                                   | 926.49  | 40.976  | 2478   | 2 | 463.75  | -9.816  |
| Q13748 TBA3C_HUMAN Tubulin alpha-3C/D chain | 1  |                                               | VGINYQPPTVPPGGDLAK                       | 352 | 18 | 15 | 87.73  | b5b6*b6b7b8b10b11*b11y1y2<br>y3y7y8y12y18                                         | 1824.99 | 65.711  | 206983 | 2 | 913.00  | 0.134   |
| Q13748 TBA3C_HUMAN Tubulin alpha-3C/D chain | 2  |                                               | QLFHPEQLITGKEDAANNYAR                    | 84  | 21 | 15 | 73.71  | b2b6*b6y1y3y5y6y7*y7y9y10<br>y12y14y21*y21                                        | 2415.17 | 61.978  | 173887 | 4 | 604.55  | -13.444 |

|                                             |    |                                         |                                             |     |    |    |        |                                                |         |         |        |   |         |         |
|---------------------------------------------|----|-----------------------------------------|---------------------------------------------|-----|----|----|--------|------------------------------------------------|---------|---------|--------|---|---------|---------|
| Q13748 TBA3C_HUMAN Tubulin alpha-3C/D chain | 3  |                                         | NLDIERPTYTNLNR                              | 215 | 14 | 17 | 62.25  | b2*b2b3b11y2y4*y4y5y7*y7y8*y8*y8y10*y10y14*y14 | 1718.86 | 52.575  | 137426 | 3 | 573.63  | -10.440 |
| Q13748 TBA3C_HUMAN Tubulin alpha-3C/D chain | 4  |                                         | IHFPLATYAPVISAEK                            | 264 | 16 | 6  | 32.84  | b1b2y4y5y7y14                                  | 1756.94 | 78.230  | 119177 | 3 | 586.32  | -11.533 |
| Q13748 TBA3C_HUMAN Tubulin alpha-3C/D chain | 5  | Carbamidomethyl+C(15)                   | AYHEQLSVAEITNACFEPANQMV<br>K                | 280 | 24 | 9  | 39.35  | b7b10b11y1y4y7y9y11y24                         | 2750.31 | 73.355  | 59845  | 3 | 917.44  | 5.060   |
| Q13748 TBA3C_HUMAN Tubulin alpha-3C/D chain | 6  |                                         | FDGALNVDLTEFQTNLVPYPR                       | 243 | 21 | 7  | 33.99  | b2b17y2y4y5y6y21                               | 2409.22 | 94.857  | 48004  | 2 | 1205.11 | 5.675   |
| Q13748 TBA3C_HUMAN Tubulin alpha-3C/D chain | 7  | Carbamidomethyl+C(8)                    | TIQFVDWCPTGFK                               | 339 | 13 | 6  | 27.21  | b3b7y4y7*y7y13                                 | 1598.77 | 83.302  | 38719  | 2 | 799.89  | 2.367   |
| Q13748 TBA3C_HUMAN Tubulin alpha-3C/D chain | 8  |                                         | LSVDYGKK                                    | 156 | 8  | 5  | 51.25  | y3y4y5y7y8                                     | 909.50  | 29.494  | 31401  | 2 | 455.25  | -7.717  |
| Q13748 TBA3C_HUMAN Tubulin alpha-3C/D chain | 9  | Carbamidomethyl+C(5)                    | LADLCTGLQGFLIFHSFGGGTGSG<br>FASLLMER        | 124 | 32 | 8  | 37.77  | b4b7*b7y3y4y12y13y15                           | 3359.63 | 120.340 | 62978  | 4 | 840.66  | -6.104  |
| Q13748 TBA3C_HUMAN Tubulin alpha-3C/D chain | 10 |                                         | TIGGGDDSFNTFFSETGAGK                        | 40  | 20 | 4  | 20.69  | b12y4y13y16                                    | 2007.91 | 77.230  | 57306  | 2 | 1004.46 | 10.518  |
| Q13748 TBA3C_HUMAN Tubulin alpha-3C/D chain | 11 | Carbamidomethyl+C(5);<br>Oxidation+M(O) | LADLCTGLQGFLIFHSFGGGTGSG<br>FASLLMER        | 124 | 32 | 7  | 22.3   | b6b11*b11y3y7y9y12                             | 3375.67 | 86.538  | 15507  | 5 | 675.94  | 4.412   |
| Q13748 TBA3C_HUMAN Tubulin alpha-3C/D chain | 12 |                                         | SVDYGKK                                     | 157 | 7  | 1  | 9.12   | b5                                             | 796.41  | 29.477  | 11417  | 2 | 398.71  | -6.897  |
| Q13748 TBA3C_HUMAN Tubulin alpha-3C/D chain | 13 |                                         | DIERPTYTNLNR                                | 217 | 12 | 1  | 7.23   | b4                                             | 1491.75 | 52.537  | 8519   | 2 | 746.38  | -6.137  |
| Q13748 TBA3C_HUMAN Tubulin alpha-3C/D chain | 14 |                                         | PGGDLAK                                     | 363 | 7  | 1  | 7.56   | b4                                             | 657.35  | 65.710  | 3026   | 2 | 329.18  | -13.092 |
| Q13748 TBA3C_HUMAN Tubulin alpha-3C/D chain | 15 |                                         | KEDAANNYAR                                  | 95  | 10 | 0  | 7.68   |                                                | 1151.56 | 61.915  | 1721   | 1 | 1151.56 | 10.601  |
| P02776 PLF4_HUMAN Platelet factor 4         | 1  | Carbamidomethyl+C(5)                    | AGPHCPTAQLIATLK                             | 62  | 15 | 14 | 128.22 | b4b5b7b8b9b10y3y4*y4y5y8y11y13y15              | 1577.83 | 60.977  | 340710 | 3 | 526.61  | -11.914 |
| P02776 PLF4_HUMAN Platelet factor 4         | 2  |                                         | HITSLEVIK                                   | 53  | 9  | 13 | 71.87  | b2b4*b4b5*b5b6b7*b7y1y2y7y8y9                  | 1039.61 | 48.011  | 258189 | 2 | 520.31  | -5.401  |
| P02776 PLF4_HUMAN Platelet factor 4         | 3  | Carbamidomethyl+C(2)                    | ICLDLQAPLYK                                 | 81  | 11 | 8  | 32.69  | b2b4b7*b7y2y4y9y11                             | 1333.72 | 73.787  | 109350 | 2 | 667.36  | 1.648   |
| P02776 PLF4_HUMAN Platelet factor 4         | 4  | Carbamidomethyl+C(3)                    | KICLDLQAPLYK                                | 80  | 12 | 3  | 24.49  | b5b6y4                                         | 1461.82 | 67.321  | 58370  | 2 | 731.41  | 4.426   |
| P02776 PLF4_HUMAN Platelet factor 4         | 5  | Carbamidomethyl+C(5)                    | AGPHCPTAQLIATLK                             | 62  | 15 | 2  | 7.26   | b13*b13                                        | 1560.80 | 60.951  | 4407   | 3 | 520.94  | -7.586  |
| Q6PEY2 TBA3E_HUMAN Tubulin alpha-3E chain   | 1  |                                         | VGINYQPPTVVPGGDLAK                          | 352 | 18 | 15 | 87.73  | b5b6*b6b7b8b10b11*b11y1y2y3y7y8y12y18          | 1824.99 | 65.711  | 206983 | 2 | 913.00  | 0.134   |
| Q6PEY2 TBA3E_HUMAN Tubulin alpha-3E chain   | 2  |                                         | NLDIERPTYTNLNR                              | 215 | 14 | 17 | 62.25  | b2*b2b3b11y2y4*y4y5y7*y7y8*y8*y8y10*y10y14*y14 | 1718.86 | 52.575  | 137426 | 3 | 573.63  | -10.440 |
| Q6PEY2 TBA3E_HUMAN Tubulin alpha-3E chain   | 3  |                                         | IHFPLATYAPVISAEK                            | 264 | 16 | 6  | 32.84  | b1b2y4y5y7y14                                  | 1756.94 | 78.230  | 119177 | 3 | 586.32  | -11.533 |
| Q6PEY2 TBA3E_HUMAN Tubulin alpha-3E chain   | 4  | Carbamidomethyl+C(15)                   | AYHEQLSVAEITNACFEPANQMV<br>K                | 280 | 24 | 9  | 39.35  | b7b10b11y1y4y7y9y11y24                         | 2750.31 | 73.355  | 59845  | 3 | 917.44  | 5.060   |
| Q6PEY2 TBA3E_HUMAN Tubulin alpha-3E chain   | 5  |                                         | FDGALNVDLTEFQTNLVPYPR                       | 243 | 21 | 7  | 33.99  | b2b17y2y4y5y6y21                               | 2409.22 | 94.857  | 48004  | 2 | 1205.11 | 5.675   |
| Q6PEY2 TBA3E_HUMAN Tubulin alpha-3E chain   | 6  | Carbamidomethyl+C(8)                    | TIQFVDWCPTGFK                               | 339 | 13 | 6  | 27.21  | b3b7y4y7*y7y13                                 | 1598.77 | 83.302  | 38719  | 2 | 799.89  | 2.367   |
| Q6PEY2 TBA3E_HUMAN Tubulin alpha-3E chain   | 7  |                                         | EDAASNYAR                                   | 96  | 9  | 5  | 28.49  | b3y3y8*y8y9                                    | 996.44  | 34.442  | 10415  | 2 | 498.72  | 2.328   |
| Q6PEY2 TBA3E_HUMAN Tubulin alpha-3E chain   | 8  |                                         | LSVDYSK                                     | 156 | 7  | 4  | 38.32  | b4y4y6*y6                                      | 811.41  | 32.079  | 1611   | 2 | 406.21  | -14.668 |
| Q6PEY2 TBA3E_HUMAN Tubulin alpha-3E chain   | 9  | Carbamidomethyl+C(5)                    | LADLCTGLQGFLIFHSFGGGTGSG<br>FASLLMERLSVDYSK | 124 | 39 | 11 | 31.89  | b3b7*b7b9b11*b11y5y7y9y11y32                   | 4152.04 | 108.123 | 4335   | 4 | 1038.77 | -3.528  |
| Q6PEY2 TBA3E_HUMAN Tubulin alpha-3E chain   | 10 | Phosphoryl STY(10)                      | QLFHPEQLITGKEDAASNYAR                       | 84  | 21 | 8  | 46.45  | b8b12b13b15*b15b16y8y10                        | 2468.13 | 94.434  | 15480  | 3 | 823.38  | -9.001  |
| P06396 GELS_HUMAN Gelsolin                  | 1  |                                         | AGALNSNDAFVLK                               | 584 | 13 | 5  | 27.21  | b3b12y4y9y13                                   | 1319.70 | 60.672  | 172609 | 2 | 660.35  | 0.555   |

|                             |    |                                                      |                                         |     |    |    |       |                                                         |         |         |        |   |         |         |
|-----------------------------|----|------------------------------------------------------|-----------------------------------------|-----|----|----|-------|---------------------------------------------------------|---------|---------|--------|---|---------|---------|
| IP06396 GELS_HUMAN Gelsolin | 2  |                                                      | NWRDPDQTDGLGLSYLSSHIANVER               | 394 | 25 | 17 | 63.26 | b2b4b6*b6b7*b7b12b13*b13y5y6y8*y8y12y14*y14y25          | 2843.34 | 78.240  | 133053 | 4 | 711.59  | -10.991 |
| IP06396 GELS_HUMAN Gelsolin | 3  |                                                      | VPFDAATLHTSTAMAAQHGMDD DGTGQK           | 419 | 28 | 12 | 51.77 | b1b4b8b10b12b13y5y6y10y13y19y28                         | 2873.26 | 56.817  | 123159 | 4 | 719.07  | -7.902  |
| IP06396 GELS_HUMAN Gelsolin | 4  |                                                      | TGAQELLR                                | 615 | 8  | 7  | 63.71 | b2b3b7y3y4y7y8                                          | 887.49  | 41.146  | 119247 | 2 | 444.25  | -7.565  |
| IP06396 GELS_HUMAN Gelsolin | 5  |                                                      | AQPVQVAEGSEPDGFWEALGGK                  | 626 | 22 | 19 | 73.5  | b2*b2b3b4*b4b12*b12*y2y3y4y6y9*y9y10*y10y11y16          | 2272.10 | 82.724  | 96385  | 2 | 1136.55 | 4.513   |
| IP06396 GELS_HUMAN Gelsolin | 6  |                                                      | QTQVSVLPEGGETPLFK                       | 373 | 17 | 18 | 90.05 | b3*b3b5*b5*b5b11b12*b12y2y4y10*y10y11y12y13y14y17*y17   | 1829.97 | 73.182  | 86124  | 2 | 915.49  | 4.469   |
| IP06396 GELS_HUMAN Gelsolin | 7  |                                                      | TASDFITK                                | 360 | 8  | 5  | 38.8  | y5y6*y6y7y8                                             | 882.45  | 38.267  | 84363  | 2 | 441.73  | -6.294  |
| IP06396 GELS_HUMAN Gelsolin | 8  | Carbamidomethyl+C(16)<br>;Carbamidomethyl+C(29)<br>) | ATEVPVSWESFNNGDCFILDLGN NIHQWCGSNSNR    | 199 | 35 | 21 | 87.98 | b1b2b3*b3b5b8b10b12b13*b13y2y4y6y7y14y15y16y18y19y26y35 | 4037.83 | 99.862  | 64222  | 3 | 1346.61 | 9.130   |
| IP06396 GELS_HUMAN Gelsolin | 9  |                                                      | AGKEPGLQIWR                             | 61  | 11 | 7  | 44.35 | b4b7*b7y4y7y8y11                                        | 1254.68 | 55.777  | 59968  | 3 | 418.90  | -14.496 |
| IP06396 GELS_HUMAN Gelsolin | 10 |                                                      | VHVSEEGTEPEAMLQVLGPKPAL PAGTEDTAKEDAANR | 257 | 38 | 3  | 11.07 | b6b9y13                                                 | 3957.91 | 70.760  | 44239  | 5 | 792.39  | -11.041 |
| IP06396 GELS_HUMAN Gelsolin | 11 |                                                      | TPSAAYLWVGTGASEAEK                      | 597 | 18 | 14 | 70.19 | b1b2b3b4b5b6b7b11b18y1y5°y5y11y18                       | 1837.87 | 68.161  | 42128  | 2 | 919.44  | -14.679 |
| IP06396 GELS_HUMAN Gelsolin | 12 |                                                      | YIETDPANR                               | 729 | 9  | 10 | 36.27 | b1b2y4*y4y5°y5y7*y7*y7y9                                | 1078.51 | 29.682  | 31614  | 2 | 539.76  | -3.509  |
| IP06396 GELS_HUMAN Gelsolin | 13 | Carbamidomethyl+C(4)                                 | SEDCFILDHGK                             | 327 | 11 | 8  | 62.14 | b2°b2y3y4y5y9y10y11                                     | 1320.58 | 48.391  | 29656  | 3 | 440.86  | -10.076 |
| IP06396 GELS_HUMAN Gelsolin | 14 |                                                      | AVEVLPK                                 | 577 | 7  | 4  | 38.32 | b3y3y5y7                                                | 755.46  | 39.811  | 27043  | 2 | 378.23  | -7.110  |
| IP06396 GELS_HUMAN Gelsolin | 15 |                                                      | HVVPNEVVQR                              | 177 | 11 | 6  | 32.69 | b3b7°b7y4y8y11                                          | 1275.72 | 38.027  | 20157  | 2 | 638.36  | -1.244  |
| IP06396 GELS_HUMAN Gelsolin | 16 |                                                      | VHVSEEGTEPEAMLQVLGPKPAL PAGTEDTAK       | 257 | 32 | 6  | 22.33 | b7b13y5y7y8°y8                                          | 3301.64 | 70.664  | 8706   | 3 | 1101.22 | -6.951  |
| IP06396 GELS_HUMAN Gelsolin | 17 |                                                      | EPAHLSLFGGKPMIHK                        | 530 | 18 | 8  | 55.7  | b3b4b5b8b9°b9b11y2                                      | 2032.09 | 72.491  | 5738   | 3 | 678.03  | 5.707   |
| IP06396 GELS_HUMAN Gelsolin | 18 |                                                      | VSNGAGTMSVSLVADENPFAQGA LK              | 302 | 25 | 6  | 17.29 | b6b9°b9b15y11y25                                        | 2463.19 | 121.383 | 1797   | 3 | 821.74  | -10.506 |
| IP06396 GELS_HUMAN Gelsolin | 19 |                                                      | DPDQTDGLGLSYLSSHIANVER                  | 397 | 22 | 14 | 67.58 | b3b4b10°b10b13*b13y5y6y9°y9y12*y12y13y18                | 2387.14 | 79.470  | 35335  | 3 | 796.38  | -3.171  |
| IP06396 GELS_HUMAN Gelsolin | 20 |                                                      | EVQGFESATFLGYFK                         | 147 | 15 | 3  | 24.68 | y3y5y10                                                 | 1722.84 | 66.614  | 25299  | 2 | 861.93  | 3.401   |
| IP06396 GELS_HUMAN Gelsolin | 21 |                                                      | MDAHPFR                                 | 661 | 7  | 4  | 50.77 | y3y4y5y6                                                | 823.40  | 55.651  | 24140  | 2 | 412.21  | 18.309  |
| IP06396 GELS_HUMAN Gelsolin | 22 | Carbamidomethyl+C(16)                                | NGNLQYDLHYWLGNECSQDESG AAAIFTVQLDDYLNRR | 104 | 38 | 5  | 11.07 | b8°b8*b8b12y6                                           | 4346.97 | 76.947  | 7720   | 5 | 870.20  | -0.112  |
| IP06396 GELS_HUMAN Gelsolin | 23 |                                                      | VPVDPATYQGFGGDSYIILYNYR                 | 457 | 24 | 10 | 57.2  | b9b13°b13b16y3y4y5y10y11*y11                            | 2771.35 | 89.753  | 2477   | 2 | 1386.18 | 5.286   |
| IP06396 GELS_HUMAN Gelsolin | 24 |                                                      | QGFEPFSVFGWFLGWDDYWSV DPLDR             | 748 | 27 | 7  | 23.52 | b5°b5b11b14°b14b16y15                                   | 3230.43 | 99.858  | 1733   | 2 | 1615.72 | -8.313  |
| IP06396 GELS_HUMAN Gelsolin | 25 |                                                      | GASQAGAPQGR                             | 32  | 11 | 5  | 22.46 | b7y6°y6y10*y10                                          | 999.49  | 26.556  | 1656   | 2 | 500.25  | -11.175 |
| IP06396 GELS_HUMAN Gelsolin | 26 | Carbamidomethyl+C(4)                                 | LFACSNKIGR                              | 668 | 10 | 5  | 52.21 | b4b5b8b9°b9                                             | 1165.62 | 69.637  | 132148 | 2 | 583.31  | 1.047   |
| IP06396 GELS_HUMAN Gelsolin | 27 |                                                      | IEGSNKVPVDPATYQGFYGGDSYI ILYNYR         | 451 | 30 | 11 | 66.41 | b7b10b25y3*y3y4y5y6y12y13y23                            | 3399.66 | 85.077  | 80573  | 3 | 1133.89 | 2.873   |
| IP06396 GELS_HUMAN Gelsolin | 28 |                                                      | VPFDAATLHTSTAMAAQHGMDD DGTGQKQIWR       | 419 | 32 | 4  | 14.85 | b19y4y11y23                                             | 3456.56 | 63.333  | 13633  | 4 | 864.90  | -13.349 |
| IP06396 GELS_HUMAN Gelsolin | 29 |                                                      | GGTSREGQTAPASTR                         | 548 | 16 | 10 | 55.43 | b3b10b12b14y11°y11*y11y12*y12y14                        | 1532.73 | 103.624 | 4422   | 3 | 511.58  | -7.088  |
| IP06396 GELS_HUMAN Gelsolin | 30 | Carbamidomethyl+C(16)<br>;Carbamidomethyl+C(29)<br>) | ATEVPVSWESFNNGDCFILDLGN NIHQWCGSNSNRYER | 199 | 38 | 3  | 11.07 | b12y9y11                                                | 4485.96 | 78.829  | 3100   | 5 | 898.00  | -8.708  |
| IP06396 GELS_HUMAN Gelsolin | 31 |                                                      | GKQANTEER                               | 346 | 9  | 3  | 28.49 | b6y4y6                                                  | 1032.49 | 108.166 | 1625   | 1 | 1032.49 | -13.833 |
| IP06396 GELS_HUMAN Gelsolin | 32 | Phosphoryl STY(13)                                   | QTQVSVLPEGGETPLFK                       | 373 | 17 | 7  | 39.06 | b9b11*b11b12b16y7y12                                    | 1909.91 | 106.379 | 2028   | 2 | 955.46  | -4.346  |
| IP06396 GELS_HUMAN Gelsolin | 33 | Oxidation+M(9)                                       | VPEARPNMSVVEHPEFLK                      | 43  | 18 | 6  | 22.74 | b4°b4b9b11°b11y11                                       | 2095.07 | 103.570 | 6788   | 2 | 1048.04 | 4.545   |

|                                                   |    |                       |                                                  |     |    |    |        |                                                                                    |         |         |        |   |         |         |
|---------------------------------------------------|----|-----------------------|--------------------------------------------------|-----|----|----|--------|------------------------------------------------------------------------------------|---------|---------|--------|---|---------|---------|
| P06396 GELS_HUMAN Gelsolin                        | 34 | Oxidation+M(8)        | VSNGAGTMSVSLVADENPFAQGA<br>LK                    | 302 | 25 | 6  | 35.47  | b4b7b9b13*b13b19                                                                   | 2479.21 | 92.519  | 2457   | 2 | 1240.11 | -2.265  |
| P06396 GELS_HUMAN Gelsolin                        | 35 |                       | EPDGFWEALGGK                                     | 636 | 12 | 0  | 8.16   |                                                                                    | 1305.63 | 82.701  | 8020   | 2 | 653.32  | 12.248  |
| P06396 GELS_HUMAN Gelsolin                        | 36 | Carbamidomethyl+C(2)  | DCFILDHGK                                        | 329 | 9  | 0  | 2.88   |                                                                                    | 1104.53 | 48.337  | 3319   | 2 | 552.77  | 10.831  |
| P06396 GELS_HUMAN Gelsolin                        | 37 |                       | GKEPGLQIWR                                       | 62  | 10 | 1  | 7.55   | b7                                                                                 | 1183.67 | 55.779  | 1856   | 2 | 592.34  | 6.291   |
| P06396 GELS_HUMAN Gelsolin                        | 38 |                       | VPFDAATLHTSTAMA                                  | 419 | 15 | 5  | 17.17  | y5y7*y7y13*y13                                                                     | 1532.72 | 56.775  | 1754   | 3 | 511.58  | -12.902 |
| P00488 F13A_HUMAN Coagulation factor XIII A chain | 1  |                       | LIAMSSDSLRL                                      | 705 | 11 | 9  | 66.81  | b2b3y3y6y7y8*y8y9y11                                                               | 1179.60 | 50.217  | 150291 | 2 | 590.30  | -1.966  |
| P00488 F13A_HUMAN Coagulation factor XIII A chain | 2  |                       | AVPPNNSNAEEDDLPTVELQGVV<br>PR                    | 13  | 25 | 9  | 49.4   | b3y1y3y4y5y7y8y14y25                                                               | 2602.30 | 75.194  | 105666 | 3 | 868.10  | -4.222  |
| P00488 F13A_HUMAN Coagulation factor XIII A chain | 3  |                       | GTYPVPIVSELQSGK                                  | 114 | 16 | 9  | 47.75  | b3*b3b4y3y7y8*y8y12y16                                                             | 1687.93 | 84.292  | 92118  | 2 | 844.47  | 2.531   |
| P00488 F13A_HUMAN Coagulation factor XIII A chain | 4  |                       | GVNLQEFNLVNTSVHLFK                               | 38  | 17 | 6  | 14.93  | b14*b14y2y4y9y17                                                                   | 1945.04 | 99.797  | 91052  | 3 | 649.02  | -6.527  |
| P00488 F13A_HUMAN Coagulation factor XIII A chain | 5  |                       | STVLTPIEIIIK                                     | 624 | 12 | 9  | 61.85  | b2*b2b4y4y6y7y8y9y12                                                               | 1326.82 | 89.022  | 85744  | 2 | 663.91  | -2.852  |
| P00488 F13A_HUMAN Coagulation factor XIII A chain | 6  |                       | DGTHVVENVVDATHIGK                                | 447 | 16 | 8  | 42.18  | b4b5b8y3y7y11*y11y16                                                               | 1691.82 | 40.231  | 59205  | 3 | 564.61  | -7.576  |
| P00488 F13A_HUMAN Coagulation factor XIII A chain | 7  |                       | LALETALMYGAK                                     | 492 | 12 | 8  | 75.07  | b2y2y4y5y7y8y9y10                                                                  | 1280.69 | 73.917  | 57468  | 2 | 640.85  | -1.049  |
| P00488 F13A_HUMAN Coagulation factor XIII A chain | 8  | Carbamidomethyl+C(8)  | DSVWNYHCWNEAWMTRPDLPV<br>GFGGWQAVDSTPQENS DGM YR | 367 | 42 | 16 | 41.64  | b3*b3b4*b4b12b19b21b23b25<br>y1y2y4y6y10y13y42                                     | 4959.15 | 97.276  | 56138  | 4 | 1240.54 | 2.560   |
| P00488 F13A_HUMAN Coagulation factor XIII A chain | 9  |                       | AQMDLSGR                                         | 245 | 8  | 7  | 31.02  | b2*b2b4*b4y3y4y8                                                                   | 877.42  | 30.870  | 40210  | 2 | 439.21  | 0.000   |
| P00488 F13A_HUMAN Coagulation factor XIII A chain | 10 | Carbamidomethyl+C(14) | NPETDTYLFPWCEDDAVYLDN<br>EKER                    | 175 | 27 | 8  | 19.04  | b2b3b6y1y5y20y24y27                                                                | 3346.50 | 90.886  | 34875  | 3 | 1116.17 | 4.742   |
| P00488 F13A_HUMAN Coagulation factor XIII A chain | 11 |                       | LSIQSSPK                                         | 144 | 8  | 7  | 63.71  | y2y3y4y5y6y7y8                                                                     | 859.48  | 31.199  | 34095  | 2 | 430.24  | -8.877  |
| P00488 F13A_HUMAN Coagulation factor XIII A chain | 12 | Carbamidomethyl+C(14) | EIRPNSTVQWEEVCRPWVSGHR                           | 682 | 22 | 11 | 49.51  | b8*b8b11b12*b12b13y3y7*y7<br>y8y22                                                 | 2722.34 | 60.939  | 27823  | 4 | 681.34  | 4.305   |
| P00488 F13A_HUMAN Coagulation factor XIII A chain | 13 |                       | FQEGQEEER                                        | 483 | 9  | 15 | 58.17  | b1b2*b2b6b9y1y4y5*y5y6*y6<br>*y6y7*y7*y7                                           | 1151.50 | 21.019  | 26569  | 2 | 576.25  | 1.166   |
| P00488 F13A_HUMAN Coagulation factor XIII A chain | 14 |                       | EAVLIQAGEYMGQLLEQASLHFF<br>VTAR                  | 585 | 27 | 28 | 181.81 | b2*b2b3*b3b4*b4b5*b5b6b7b9<br>b10b15b16*b16*b16y3y5y6y7<br>y9y12y13y14y16y17y21y27 | 3021.55 | 136.693 | 24502  | 3 | 1007.86 | 0.889   |
| P00488 F13A_HUMAN Coagulation factor XIII A chain | 15 |                       | VGSAMVNAK                                        | 261 | 9  | 12 | 61.18  | b2b4*b4y1y2y3*y3y4y7*y7y8<br>y9                                                    | 876.45  | 25.533  | 24116  | 2 | 438.73  | -7.451  |
| P00488 F13A_HUMAN Coagulation factor XIII A chain | 16 | Carbamidomethyl+C(14) | NPETDTYLFPWCEDDAVYLDN<br>EK                      | 175 | 25 | 6  | 25.76  | b2b3b4b6b8y6                                                                       | 3061.35 | 96.581  | 2339   | 2 | 1531.18 | 2.951   |
| P00488 F13A_HUMAN Coagulation factor XIII A chain | 17 | Carbamidomethyl+C(1)  | CGPASVQAIK                                       | 409 | 10 | 6  | 26.75  | b2b7y2y6y7y10                                                                      | 1030.54 | 34.949  | 1879   | 1 | 1030.54 | 1.303   |
| P00488 F13A_HUMAN Coagulation factor XIII A chain | 18 |                       | MYVAVWTPYGVLR                                    | 159 | 13 | 3  | 23.72  | b3y6y7                                                                             | 1554.82 | 91.143  | 63341  | 2 | 777.91  | 1.256   |
| P00488 F13A_HUMAN Coagulation factor XIII A chain | 19 | Carbamidomethyl+C(4)  | YGQCWFVAGVFNTFLR                                 | 311 | 16 | 5  | 26.11  | b6y3y5y6*y6                                                                        | 1964.95 | 114.246 | 18344  | 2 | 982.98  | 3.044   |
| P00488 F13A_HUMAN Coagulation factor XIII A chain | 20 |                       | VEYVIGR                                          | 101 | 7  | 4  | 38.32  | b3*b3b5y6                                                                          | 835.46  | 42.709  | 12932  | 2 | 418.23  | -7.452  |
| P00488 F13A_HUMAN Coagulation factor XIII A chain | 21 |                       | SNVDMDFEVENAVLGK                                 | 516 | 16 | 6  | 26.11  | b10y11*y11y12*y12y15                                                               | 1766.82 | 72.474  | 9965   | 3 | 589.61  | -2.349  |
| P00488 F13A_HUMAN Coagulation factor XIII A chain | 22 |                       | GQSFYVQIDFSRPYDPR                                | 79  | 17 | 3  | 22.33  | b7b9b13                                                                            | 2074.99 | 81.751  | 4055   | 3 | 692.33  | -5.177  |
| P00488 F13A_HUMAN Coagulation factor XIII A chain | 23 |                       | YPQENK                                           | 108 | 6  | 1  | 12.93  | b4                                                                                 | 778.37  | 26.536  | 1641   | 1 | 778.37  | -7.920  |
| P00488 F13A_HUMAN Coagulation factor XIII A chain | 24 |                       | VEYVIGRYPQENK                                    | 101 | 13 | 6  | 40.64  | y6*y6y8y9*y9y10                                                                    | 1594.83 | 46.879  | 46791  | 3 | 532.28  | 5.511   |

|                                                    |    |                                            |                                     |     |    |    |        |                                                       |         |         |        |   |         |         |
|----------------------------------------------------|----|--------------------------------------------|-------------------------------------|-----|----|----|--------|-------------------------------------------------------|---------|---------|--------|---|---------|---------|
| [P00488]F13A_HUMAN Coagulation factor XIII A chain | 25 | Carbamidomethyl+C(14)                      | NPETDITYILFNPWCEDDAVYLDN EKER       | 175 | 27 | 4  | 17.36  | y6y8*y8y11                                            | 3346.44 | 87.531  | 27970  | 4 | 837.37  | -13.059 |
| [P00488]F13A_HUMAN Coagulation factor XIII A chain | 26 |                                            | RAVPPNNSNAEEDDLPTVELQGV VPR         | 12  | 26 | 3  | 11.43  | b3b15y5                                               | 2758.39 | 70.602  | 17555  | 3 | 920.14  | -6.727  |
| [P00488]F13A_HUMAN Coagulation factor XIII A chain | 27 |                                            | QIGGDGMMDITDTYKFQEQEER R            | 468 | 24 | 5  | 26.68  | b6b7*b7b10b14                                         | 2777.21 | 68.209  | 15010  | 3 | 926.41  | 3.604   |
| [P00488]F13A_HUMAN Coagulation factor XIII A chain | 28 |                                            | GNIPIKVSRR                          | 253 | 8  | 5  | 58.93  | b3y3y4y5y6                                            | 870.51  | 24.488  | 14971  | 2 | 435.76  | -3.085  |
| [P00488]F13A_HUMAN Coagulation factor XIII A chain | 29 | Carbamidomethyl+C(17)                      | TSRNPETDITYILFNPWCEDDAVYL DNEK      | 172 | 28 | 4  | 13.59  | b6b11y4y6                                             | 3405.54 | 90.210  | 8576   | 3 | 1135.85 | 4.015   |
| [P00488]F13A_HUMAN Coagulation factor XIII A chain | 30 | Carbamidomethyl+C(17)                      | TRSWSYGQFEDGILDTCLYVMDR             | 222 | 23 | 3  | 12.12  | b11y5y9                                               | 2812.29 | 50.718  | 3894   | 3 | 938.10  | 7.900   |
| [P00488]F13A_HUMAN Coagulation factor XIII A chain | 31 |                                            | FQEQEERLALETALMYGAK                 | 483 | 21 | 3  | 12.79  | b19y4y7                                               | 2413.18 | 83.969  | 2475   | 3 | 805.06  | 3.440   |
| [P00488]F13A_HUMAN Coagulation factor XIII A chain | 32 |                                            | GQSFYVQIDFSRPYDPRR                  | 79  | 18 | 4  | 14.27  | b4b8*b8y6                                             | 2231.10 | 69.614  | 2159   | 4 | 558.53  | 0.657   |
| [P00488]F13A_HUMAN Coagulation factor XIII A chain | 33 |                                            | SETSRTAFGGR                         | 1   | 11 | 3  | 25.47  | b6y3y4                                                | 1168.57 | 53.269  | 1837   | 2 | 584.79  | 1.880   |
| [P00488]F13A_HUMAN Coagulation factor XIII A chain | 34 |                                            | LIASMSSDSLHVVYGELDVQIQR             | 705 | 23 | 4  | 22.1   | b7b8b11y10                                            | 2617.33 | 109.310 | 1656   | 2 | 1309.17 | -5.317  |
| [P00488]F13A_HUMAN Coagulation factor XIII A chain | 35 | Phosphoryl STY(9)                          | MYVAVWTPYGVLR                       | 159 | 13 | 6  | 55.34  | b3b4b6b8y6y7                                          | 1634.78 | 57.990  | 43266  | 3 | 545.60  | 5.003   |
| [P00488]F13A_HUMAN Coagulation factor XIII A chain | 36 | Phosphoryl STY(2)                          | LSIQSSPK                            | 144 | 8  | 3  | 31.02  | b3b4_HPO3 b4y5                                        | 939.45  | 34.988  | 5457   | 2 | 470.23  | 7.212   |
| [P00488]F13A_HUMAN Coagulation factor XIII A chain | 37 |                                            | EAVLIQAGEYMGQLLEQ                   | 585 | 17 | 1  | 9.59   | y6                                                    | 1891.94 | 136.645 | 2923   | 1 | 1891.94 | -4.904  |
| [P00488]F13A_HUMAN Coagulation factor XIII A chain | 38 |                                            | SIQSSPK                             | 145 | 7  | 1  | 9.12   | b3                                                    | 746.40  | 31.171  | 1883   | 1 | 746.40  | -11.285 |
| [P00488]F13A_HUMAN Coagulation factor XIII A chain | 39 |                                            | MSSDSLRR                            | 709 | 7  | 0  | 2.88   |                                                       | 795.37  | 50.237  | 1648   | 1 | 795.37  | 0.614   |
| [P10720]PF4V_HUMAN Platelet factor 4 variant       | 1  | Carbamidomethyl+C(5)                       | AGPHCPTAQLIATLK                     | 65  | 15 | 14 | 128.22 | b4b5b7b8b9b10y3y4*y4y5y8y11y13y15                     | 1577.83 | 60.977  | 340710 | 3 | 526.61  | -11.914 |
| [P10720]PF4V_HUMAN Platelet factor 4 variant       | 2  |                                            | HITSLEVIK                           | 56  | 9  | 13 | 71.87  | b2b4*b4b5*b5b6b7*b7y1y2y7y8y9                         | 1039.61 | 48.011  | 258189 | 2 | 520.31  | -5.401  |
| [P04350]TBB4_HUMAN Tubulin beta-4 chain            | 1  |                                            | SGPFGQIFRPDNFVFGQSGAGNN WAK         | 77  | 26 | 13 | 60.34  | b5b7b14b15y1y2y3y4y6y8y9y12y26                        | 2798.36 | 89.820  | 170532 | 3 | 933.46  | 4.188   |
| [P04350]TBB4_HUMAN Tubulin beta-4 chain            | 2  |                                            | LAVNMVFPFR                          | 252 | 10 | 8  | 77.12  | b2y4y5y6y7y8y9y10                                     | 1143.63 | 72.778  | 168761 | 2 | 572.32  | -4.483  |
| [P04350]TBB4_HUMAN Tubulin beta-4 chain            | 3  |                                            | IMNTFSVVPSPK                        | 162 | 12 | 7  | 57.85  | y4*y4y6y7y8y9y12                                      | 1319.71 | 63.743  | 106849 | 2 | 660.36  | 1.850   |
| [P04350]TBB4_HUMAN Tubulin beta-4 chain            | 4  | Carbamidomethyl+C(23)                      | LTTPTYGDLNHLVSATMSGVTTC LR          | 216 | 25 | 20 | 167.71 | y1y2y3y4*y4y5y6y7y8y9y10y11y12*y12y13y14y22y23y25*y25 | 2708.33 | 95.559  | 75112  | 3 | 903.45  | -1.262  |
| [P04350]TBB4_HUMAN Tubulin beta-4 chain            | 5  | Carbamidomethyl+C(6); Carbamidomethyl+C(8) | KEAESCDLQGFQLTHSLGGGTG SGMGTLTLLISK | 121 | 33 | 5  | 20.66  | b5y3y4y7y33                                           | 3439.61 | 78.142  | 64061  | 4 | 860.66  | -6.530  |
| [P04350]TBB4_HUMAN Tubulin beta-4 chain            | 6  | Carbamidomethyl+C(10)                      | EIVHLQAGQCGNQIGAK                   | 2   | 17 | 3  | 23.58  | y8y11y12                                              | 1822.91 | 43.480  | 52987  | 3 | 608.31  | -4.621  |
| [P04350]TBB4_HUMAN Tubulin beta-4 chain            | 7  |                                            | AVLVDLEPGTMDSVR                     | 62  | 15 | 8  | 27.13  | b2b3y2y8*y8y9y11y15                                   | 1601.82 | 71.013  | 47589  | 2 | 801.41  | -0.915  |
| [P04350]TBB4_HUMAN Tubulin beta-4 chain            | 8  |                                            | LHFFMPGFAPLTSR                      | 262 | 14 | 6  | 35.88  | b5b8b9y3y12y14                                        | 1620.82 | 89.694  | 38804  | 3 | 540.94  | -10.393 |
| [P04350]TBB4_HUMAN Tubulin beta-4 chain            | 9  |                                            | ALTVPELTQQMFDK                      | 282 | 15 | 10 | 59.29  | y1y3y7*y7*y7y9*y9y11*y11y14                           | 1691.87 | 85.950  | 31120  | 2 | 846.44  | 0.433   |
| [P04350]TBB4_HUMAN Tubulin beta-4 chain            | 10 |                                            | INVYYNEATGGNYVPR                    | 46  | 16 | 8  | 26.11  | b1b2b12y1y5y12y13*y13                                 | 1829.86 | 81.876  | 24188  | 2 | 915.43  | -10.940 |
| [P04350]TBB4_HUMAN Tubulin beta-4 chain            | 11 |                                            | MSMKEVDEQMLSVQSK                    | 320 | 16 | 3  | 22.23  | b5b6y10                                               | 1869.85 | 52.136  | 14605  | 3 | 623.96  | -11.359 |

|                                          |    |                                           |                                     |     |    |    |        |                                                       |         |         |        |   |        |         |
|------------------------------------------|----|-------------------------------------------|-------------------------------------|-----|----|----|--------|-------------------------------------------------------|---------|---------|--------|---|--------|---------|
| P04350 TBB4_HUMAN Tubulin beta-4 chain   | 12 |                                           | GHYTEGAELVDAVL DVVR                 | 103 | 18 | 3  | 14.27  | b10b12y4                                              | 1942.96 | 120.123 | 3461   | 3 | 648.32 | -14.701 |
| P04350 TBB4_HUMAN Tubulin beta-4 chain   | 13 |                                           | MAATFIGNSTAIQELFK                   | 362 | 17 | 6  | 20.77  | b6b9*b9y3y5*y5                                        | 1841.98 | 116.278 | 33941  | 2 | 921.49 | 19.285  |
| P04350 TBB4_HUMAN Tubulin beta-4 chain   | 14 |                                           | EEFPDRIMNTFSV VVSPK                 | 156 | 18 | 7  | 23.19  | b8*b8b9*b9b13*b13*b13                                 | 2093.01 | 108.165 | 51320  | 3 | 698.34 | -12.714 |
| P04350 TBB4_HUMAN Tubulin beta-4 chain   | 15 |                                           | MSMKEVDEQMLS VQSK                   | 320 | 16 | 3  | 15.7   | b5b13y15                                              | 1869.89 | 80.106  | 1684   | 2 | 935.45 | 6.071   |
| P04350 TBB4_HUMAN Tubulin beta-4 chain   | 16 | Carbamidomethyl+C(23);Phosphoryl STY(O)   | LTTPTYGDLNHLVSATMSGV TTC LR         | 216 | 25 | 11 | 43.04  | b7*b7b11*b11b12b15y4y6*y6y9y10                        | 2788.28 | 62.847  | 9289   | 3 | 930.10 | -6.742  |
| P68371 TBB2C_HUMAN Tubulin beta-2C chain | 1  |                                           | SGPFGQIFRPDNFVFGQSGAGNN WAK         | 77  | 26 | 13 | 60.34  | b5b7b14b15y1y2y3y4y6y8y9y12y26                        | 2798.36 | 89.820  | 170532 | 3 | 933.46 | 4.188   |
| P68371 TBB2C_HUMAN Tubulin beta-2C chain | 2  |                                           | LAVNMVFPFR                          | 252 | 10 | 8  | 77.12  | b2y4y5y6y7y8y9y10                                     | 1143.63 | 72.778  | 168761 | 2 | 572.32 | -4.483  |
| P68371 TBB2C_HUMAN Tubulin beta-2C chain | 3  |                                           | IMNTFSV VVSPK                       | 162 | 12 | 7  | 57.85  | y4*y4y6y7y8y9y12                                      | 1319.71 | 63.743  | 106849 | 2 | 660.36 | 1.850   |
| P68371 TBB2C_HUMAN Tubulin beta-2C chain | 4  | Carbamidomethyl+C(23)                     | LTTPTYGDLNHLVSATMSGV TTC LR         | 216 | 25 | 20 | 167.71 | y1y2y3y4*y4y5y6y7y8y9y10y11y12*y12y13y14y22y23y25*y25 | 2708.33 | 95.559  | 75112  | 3 | 903.45 | -1.262  |
| P68371 TBB2C_HUMAN Tubulin beta-2C chain | 5  | Carbamidomethyl+C(6);Carbamidomethyl+C(8) | KEAESCDCLQGFQLTHSLGGGTG SGMGTL LISK | 121 | 33 | 5  | 20.66  | b5y3y4y7y33                                           | 3439.61 | 78.142  | 64061  | 4 | 860.66 | -6.530  |
| P68371 TBB2C_HUMAN Tubulin beta-2C chain | 6  | Carbamidomethyl+C(10)                     | EIVHLQAGQCGNQIGAK                   | 2   | 17 | 3  | 23.58  | y8y11y12                                              | 1822.91 | 43.480  | 52987  | 3 | 608.31 | -4.621  |
| P68371 TBB2C_HUMAN Tubulin beta-2C chain | 7  |                                           | AVLVDLEPGTMDSVR                     | 62  | 15 | 8  | 27.13  | b2b3y2y8*y8y9y11y15                                   | 1601.82 | 71.013  | 47589  | 2 | 801.41 | -0.915  |
| P68371 TBB2C_HUMAN Tubulin beta-2C chain | 8  |                                           | LHFFMPGFAPLTSR                      | 262 | 14 | 6  | 35.88  | b5b8b9y3y12y14                                        | 1620.82 | 89.694  | 38804  | 3 | 540.94 | -10.393 |
| P68371 TBB2C_HUMAN Tubulin beta-2C chain | 9  |                                           | ALTVP ELTQMFDAK                     | 282 | 15 | 10 | 59.29  | y1y3y7*y7*y7y9*y9y11*y11y14                           | 1691.87 | 85.950  | 31120  | 2 | 846.44 | 0.433   |
| P68371 TBB2C_HUMAN Tubulin beta-2C chain | 10 |                                           | IREEYPDR                            | 154 | 8  | 7  | 51.25  | b2b4b7y1y3y6y8                                        | 1077.54 | 25.047  | 19158  | 2 | 539.27 | 3.285   |
| P68371 TBB2C_HUMAN Tubulin beta-2C chain | 11 |                                           | INVYYNEATGGK                        | 46  | 12 | 5  | 27.71  | y4y8*y8y9y12                                          | 1328.66 | 44.745  | 15220  | 2 | 664.83 | 9.739   |
| P68371 TBB2C_HUMAN Tubulin beta-2C chain | 12 |                                           | GSQQYRALTVPELTQMFDAK                | 276 | 21 | 11 | 46.45  | b5b8y3*y3y5*y5y6y7*y7y10*y10                          | 2411.21 | 43.320  | 144871 | 4 | 603.56 | 4.253   |
| P68371 TBB2C_HUMAN Tubulin beta-2C chain | 13 |                                           | GLKMSATFIGNSTAIQELFK                | 359 | 20 | 4  | 21.34  | b15b16*b16y13                                         | 2156.13 | 136.530 | 15131  | 3 | 719.38 | -4.076  |
| P07437 TBB5_HUMAN Tubulin beta chain     | 1  |                                           | SGPFGQIFRPDNFVFGQSGAGNN WAK         | 77  | 26 | 13 | 60.34  | b5b7b14b15y1y2y3y4y6y8y9y12y26                        | 2798.36 | 89.820  | 170532 | 3 | 933.46 | 4.188   |
| P07437 TBB5_HUMAN Tubulin beta chain     | 2  |                                           | LAVNMVFPFR                          | 252 | 10 | 8  | 77.12  | b2y4y5y6y7y8y9y10                                     | 1143.63 | 72.778  | 168761 | 2 | 572.32 | -4.483  |
| P07437 TBB5_HUMAN Tubulin beta chain     | 3  |                                           | IMNTFSV VVSPK                       | 162 | 12 | 7  | 57.85  | y4*y4y6y7y8y9y12                                      | 1319.71 | 63.743  | 106849 | 2 | 660.36 | 1.850   |
| P07437 TBB5_HUMAN Tubulin beta chain     | 4  | Carbamidomethyl+C(23)                     | LTTPTYGDLNHLVSATMSGV TTC LR         | 216 | 25 | 20 | 167.71 | y1y2y3y4*y4y5y6y7y8y9y10y11y12*y12y13y14y22y23y25*y25 | 2708.33 | 95.559  | 75112  | 3 | 903.45 | -1.262  |
| P07437 TBB5_HUMAN Tubulin beta chain     | 5  | Carbamidomethyl+C(6);Carbamidomethyl+C(8) | KEAESCDCLQGFQLTHSLGGGTG SGMGTL LISK | 121 | 33 | 5  | 20.66  | b5y3y4y7y33                                           | 3439.61 | 78.142  | 64061  | 4 | 860.66 | -6.530  |
| P07437 TBB5_HUMAN Tubulin beta chain     | 6  |                                           | MAVTFIGNSTAIQELFKR                  | 362 | 18 | 5  | 14.27  | b3y2y6y15y18                                          | 2026.06 | 91.169  | 49234  | 3 | 676.03 | -8.375  |
| P07437 TBB5_HUMAN Tubulin beta chain     | 7  |                                           | FWEVISDEHGIDPTGYHGSD LQ LDR         | 19  | 27 | 7  | 36.6   | b2b4b5b6y4*y4y13                                      | 3102.40 | 74.498  | 42998  | 4 | 776.36 | -1.023  |
| P07437 TBB5_HUMAN Tubulin beta chain     | 8  |                                           | LHFFMPGFAPLTSR                      | 262 | 14 | 6  | 35.88  | b5b8b9y3y12y14                                        | 1620.82 | 89.694  | 38804  | 3 | 540.94 | -10.393 |
| P07437 TBB5_HUMAN Tubulin beta chain     | 9  |                                           | ISVYYNEATGGK                        | 46  | 12 | 7  | 46.38  | b7y3y6y7y9*y11y12                                     | 1301.64 | 44.827  | 33501  | 2 | 651.32 | 1.594   |

|                                                     |    |                                            |                                       |     |    |    |       |                                                                                    |         |         |        |   |         |         |
|-----------------------------------------------------|----|--------------------------------------------|---------------------------------------|-----|----|----|-------|------------------------------------------------------------------------------------|---------|---------|--------|---|---------|---------|
| P07437 TBB5_HUMAN Tubulin beta chain                | 10 |                                            | IREEYPDR                              | 154 | 8  | 7  | 51.25 | b2b4b7y1y3y6y8                                                                     | 1077.54 | 25.047  | 19158  | 2 | 539.27  | 3.285   |
| P07437 TBB5_HUMAN Tubulin beta chain                | 11 | Carbamidomethyl+C(5); Carbamidomethyl+C(7) | EAESCDCLQGFQLTHSLGGGTGS GMGTLISK      | 122 | 32 | 3  | 16.71 | y4y7y14                                                                            | 3311.55 | 81.851  | 47828  | 3 | 1104.52 | 4.866   |
| P07437 TBB5_HUMAN Tubulin beta chain                | 12 |                                            | MAVTFIGNSTAIQELFK                     | 362 | 17 | 10 | 51.06 | b3b6b7°b7b10°b10b13y3y5*y5                                                         | 1869.98 | 116.279 | 2354   | 3 | 624.00  | 3.395   |
| P07437 TBB5_HUMAN Tubulin beta chain                | 13 |                                            | GHYTEGAELVDSVLDVVRK                   | 103 | 19 | 3  | 33.29 | b10b11b12                                                                          | 2087.08 | 85.968  | 20711  | 3 | 696.37  | 2.457   |
| P07437 TBB5_HUMAN Tubulin beta chain                | 14 |                                            | ISVYYNEATGGKYVPR                      | 46  | 16 | 4  | 15.7  | b7*b7b11y10                                                                        | 1816.91 | 51.831  | 19263  | 3 | 606.31  | -6.853  |
| P07437 TBB5_HUMAN Tubulin beta chain                | 15 | Carbamidomethyl+C(18)                      | NSSYFVEWIPNNVKTAUCDIPPR               | 336 | 23 | 7  | 31.12 | b3b6°b6°b6b13y7y8                                                                  | 2706.30 | 72.439  | 5438   | 3 | 902.77  | -11.096 |
| P07437 TBB5_HUMAN Tubulin beta chain                | 16 | Phosphoryl STY(8)                          | ALTVELTQQVFDK                         | 282 | 15 | 13 | 59.05 | b4b8_H3PO4<br>b8°b8b10°b10y5y7°y7*y7y10*<br>y10y12_HPO3 y12°y12                    | 1739.86 | 62.835  | 3479   | 3 | 580.63  | 6.806   |
| P07437 TBB5_HUMAN Tubulin beta chain                | 17 | Oxidation+M()                              | ISEQFTAMFRR                           | 380 | 11 | 7  | 38.89 | b3°b3b5b9y10°y10*y10                                                               | 1401.70 | 93.138  | 2234   | 3 | 467.91  | 6.357   |
| P09972 ALDOC_HUMAN Fructose-bisphosphate aldolase C | 1  | Carbamidomethyl+C(5)                       | YASICQQNGVIVPEILPDGDHDLKR             | 173 | 28 | 28 | 139.7 | b2b4b5b7°b7b8b9°b9b10°b10<br>*b10b11°b11b15y1y2y3y5y7y<br>8°y8y9°y9y10y13y14y17y28 | 3176.58 | 76.297  | 114287 | 4 | 794.90  | -6.610  |
| P09972 ALDOC_HUMAN Fructose-bisphosphate aldolase C | 2  | Carbamidomethyl+C(1)                       | CIGGVIFFHETLYQK                       | 72  | 15 | 5  | 23.49 | b3b8y7y10y15                                                                       | 1811.93 | 106.637 | 15347  | 2 | 906.47  | 7.141   |
| P09972 ALDOC_HUMAN Fructose-bisphosphate aldolase C | 3  |                                            | GQRDNAGAATEEFIK                       | 315 | 15 | 4  | 16.6  | b2b9b12y4                                                                          | 1606.76 | 39.930  | 2063   | 4 | 402.45  | -13.523 |
| P09972 ALDOC_HUMAN Fructose-bisphosphate aldolase C | 4  |                                            | IVAPGK                                | 22  | 6  | 1  | 12.93 | b5                                                                                 | 584.38  | 42.738  | 19955  | 1 | 584.38  | 5.013   |
| P09972 ALDOC_HUMAN Fructose-bisphosphate aldolase C | 5  |                                            | PHSYPALSAEQK                          | 1   | 12 | 7  | 46.38 | b5b9°b9b10b11y8*y8                                                                 | 1327.64 | 53.215  | 7098   | 2 | 664.33  | -14.895 |
| P09972 ALDOC_HUMAN Fructose-bisphosphate aldolase C | 6  |                                            | YTPEEIAMATVTALR                       | 243 | 15 | 4  | 24.68 | b4b6b11°b11                                                                        | 1665.85 | 64.200  | 3279   | 3 | 555.95  | -1.099  |
| P09972 ALDOC_HUMAN Fructose-bisphosphate aldolase C | 7  |                                            | GVVPLAGTDGETTTQGLDGLSER               | 111 | 23 | 7  | 34.8  | b3b4b15y14y15°y15*y15                                                              | 2273.11 | 122.115 | 3045   | 3 | 758.37  | -7.733  |
| P09972 ALDOC_HUMAN Fructose-bisphosphate aldolase C | 8  |                                            | DNAGAATEEFIK                          | 318 | 12 | 4  | 20.51 | b8y6y9°y9                                                                          | 1265.61 | 60.118  | 2227   | 2 | 633.31  | 8.777   |
| P09972 ALDOC_HUMAN Fructose-bisphosphate aldolase C | 9  |                                            | LYRQVLFSADDR                          | 57  | 12 | 6  | 30.72 | y5y7°y7y9°y9*y9                                                                    | 1482.76 | 40.631  | 228055 | 3 | 494.93  | -6.257  |
| P09972 ALDOC_HUMAN Fructose-bisphosphate aldolase C | 10 |                                            | YTPEEIAMATVTALRR                      | 243 | 16 | 4  | 23.4  | b4b7b10°b10                                                                        | 1821.96 | 36.632  | 60527  | 4 | 456.25  | 6.030   |
| P09972 ALDOC_HUMAN Fructose-bisphosphate aldolase C | 11 |                                            | IVAPGKGILAADES VGSMK                  | 22  | 20 | 6  | 38.82 | y4y5°y5y7°y7y8                                                                     | 1914.02 | 118.071 | 21193  | 3 | 638.68  | -8.291  |
| P09972 ALDOC_HUMAN Fructose-bisphosphate aldolase C | 12 |                                            | GILAADES VGSMKR                       | 28  | 15 | 4  | 22.62 | b9°b9b10y12                                                                        | 1504.77 | 68.070  | 6239   | 2 | 752.89  | -7.544  |
| P09972 ALDOC_HUMAN Fructose-bisphosphate aldolase C | 13 |                                            | AEVNGLAAQKYGESGEGDGGAA<br>AQLSYIANHAY | 331 | 33 | 8  | 35.86 | b4°b4b5b10b15b16°b16y3                                                             | 3282.49 | 86.548  | 5574   | 3 | 1094.83 | -12.272 |
| P09972 ALDOC_HUMAN Fructose-bisphosphate aldolase C | 14 |                                            | DNAGAATEEFIKR                         | 318 | 13 | 4  | 27.21 | b3b5y3y11                                                                          | 1421.70 | 87.426  | 4298   | 1 | 1421.70 | -0.172  |
| P09972 ALDOC_HUMAN Fructose-bisphosphate aldolase C | 15 | Carbamidomethyl+C(1)                       | CIGGVIFFHETLYQKDDNGVPFVR              | 72  | 24 | 4  | 34.18 | b9b10°b10b11                                                                       | 2811.41 | 123.641 | 2510   | 3 | 937.81  | 6.253   |
| P09972 ALDOC_HUMAN Fructose-bisphosphate aldolase C | 16 | Carbamidomethyl+C(1); Phosphoryl STY(13)   | CIGGVIFFHETLYQK                       | 72  | 15 | 5  | 34.02 | b3b11y3y8_H3PO4 y8y10                                                              | 1891.89 | 44.903  | 7501   | 3 | 631.30  | 7.485   |
| P09972 ALDOC_HUMAN Fructose-bisphosphate aldolase C | 17 | Phosphoryl STY(9)                          | LSQIGVENTEENRR                        | 43  | 14 | 4  | 17.67 | b10°b10y5y8_HPO3 y8                                                                | 1724.80 | 43.816  | 4332   | 3 | 575.60  | 6.016   |
| P09972 ALDOC_HUMAN Fructose-bisphosphate aldolase C | 18 |                                            | PIVEPEILPDGDHDLKR                     | 184 | 17 | 2  | 22.53 | b3b4                                                                               | 1943.02 | 76.290  | 2905   | 2 | 972.01  | -2.073  |

|                                             |    |                       |                              |     |    |    |        |                                        |         |         |        |   |         |         |
|---------------------------------------------|----|-----------------------|------------------------------|-----|----|----|--------|----------------------------------------|---------|---------|--------|---|---------|---------|
| P06753 TPM3_HUMAN Tropomyosin alpha-3 chain | 1  |                       | IQLVEELDR                    | 91  | 10 | 16 | 95.04  | b2*b2b3y1y2y3y4*y4y5*y5y6y7y8y9*y9y10  | 1243.65 | 59.102  | 271670 | 2 | 622.33  | -2.454  |
| P06753 TPM3_HUMAN Tropomyosin alpha-3 chain | 2  |                       | LATALQK                      | 105 | 7  | 10 | 60.22  | b4*b4y3y4y5*y5y6*y6y7*y7               | 744.45  | 28.648  | 24903  | 2 | 372.73  | -9.264  |
| P06753 TPM3_HUMAN Tropomyosin alpha-3 chain | 3  |                       | AADAEAEVASLNR                | 77  | 13 | 6  | 29.85  | b2b4y5y6*y6y10                         | 1316.65 | 41.231  | 9276   | 2 | 658.83  | 5.841   |
| P06753 TPM3_HUMAN Tropomyosin alpha-3 chain | 4  |                       | YSEALK                       | 59  | 6  | 1  | 12.93  | b3                                     | 710.37  | 38.279  | 9375   | 1 | 710.37  | -0.086  |
| P06753 TPM3_HUMAN Tropomyosin alpha-3 chain | 5  |                       | VIENR                        | 128 | 5  | 2  | 12.45  | b4*b4                                  | 630.35  | 27.796  | 7748   | 1 | 630.35  | -7.940  |
| P06753 TPM3_HUMAN Tropomyosin alpha-3 chain | 6  |                       | LELAEK                       | 70  | 6  | 1  | 12.93  | y3                                     | 702.41  | 55.261  | 4178   | 1 | 702.41  | 7.039   |
| P06753 TPM3_HUMAN Tropomyosin alpha-3 chain | 7  |                       | AADESER                      | 118 | 7  | 3  | 35.31  | b5y3y4                                 | 777.35  | 29.064  | 3513   | 1 | 777.35  | 19.630  |
| P06753 TPM3_HUMAN Tropomyosin alpha-3 chain | 8  |                       | AISEELDHALNDMTSI             | 268 | 16 | 11 | 78.87  | b4*b4b8b9b12y4y10y11*y11y12y13         | 1758.84 | 74.509  | 2466   | 2 | 879.92  | 9.508   |
| P06753 TPM3_HUMAN Tropomyosin alpha-3 chain | 9  |                       | QLEDELAAMQK                  | 37  | 11 | 3  | 22.46  | b10y4y9                                | 1275.61 | 89.618  | 1870   | 2 | 638.31  | -11.962 |
| P06753 TPM3_HUMAN Tropomyosin alpha-3 chain | 10 |                       | TIDDLEDELYAQK                | 251 | 13 | 3  | 18.95  | b4b12y4                                | 1552.75 | 53.281  | 1856   | 2 | 776.88  | 8.491   |
| P06753 TPM3_HUMAN Tropomyosin alpha-3 chain | 11 | Carbamidomethyl+C(8)  | AELAESKCSELEELK              | 182 | 16 | 5  | 22.03  | b8b13y11*y11y15                        | 1864.91 | 84.004  | 74300  | 2 | 932.96  | 11.651  |
| P06753 TPM3_HUMAN Tropomyosin alpha-3 chain | 12 |                       | LEEAEKADESER                 | 112 | 13 | 4  | 26.43  | y4*y4y5y8                              | 1476.68 | 25.067  | 12171  | 3 | 492.90  | -2.480  |
| P06753 TPM3_HUMAN Tropomyosin alpha-3 chain | 13 |                       | GTEDELDKYSEALK               | 51  | 14 | 5  | 29.15  | b3b9b12*b12y8                          | 1597.76 | 34.981  | 7207   | 3 | 533.26  | -0.917  |
| P06753 TPM3_HUMAN Tropomyosin alpha-3 chain | 14 |                       | LVIIEGDLERTEER               | 168 | 14 | 3  | 17.67  | b7b10y11                               | 1671.91 | 55.797  | 3101   | 2 | 836.46  | 9.419   |
| P06753 TPM3_HUMAN Tropomyosin alpha-3 chain | 15 |                       | KAADAEAEVASLNR               | 76  | 14 | 6  | 29.15  | b3b8*b8b11y13*y13                      | 1444.73 | 82.726  | 2859   | 2 | 722.87  | -4.647  |
| P06753 TPM3_HUMAN Tropomyosin alpha-3 chain | 16 |                       | HIAEEADRK                    | 152 | 9  | 12 | 110.99 | b3b4b8y3y4*y4y5*y5y6*y6y7y8            | 1068.53 | 21.957  | 2653   | 3 | 356.85  | -11.081 |
| P06753 TPM3_HUMAN Tropomyosin alpha-3 chain | 17 |                       | YKAISEELDHALNDMTSI           | 266 | 18 | 4  | 14.27  | b11*b11y9y12                           | 2049.97 | 106.311 | 2153   | 3 | 683.99  | -4.883  |
| P06753 TPM3_HUMAN Tropomyosin alpha-3 chain | 18 |                       | ENALDRAEQAEAEQK              | 15  | 15 | 3  | 16.6   | b4b9y5                                 | 1701.80 | 37.438  | 2071   | 2 | 851.40  | -2.511  |
| P06753 TPM3_HUMAN Tropomyosin alpha-3 chain | 19 | Carbamidomethyl+C(1)  | CSELEELKNVTNNLK              | 189 | 16 | 5  | 22.23  | b11*b11b12*b12y11                      | 1919.92 | 108.116 | 1624   | 2 | 960.46  | -8.138  |
| P06753 TPM3_HUMAN Tropomyosin alpha-3 chain | 20 |                       | SKQLEDELAAMQK                | 35  | 13 | 4  | 33.42  | y9*y9y10y11                            | 1490.74 | 45.701  | 1572   | 3 | 497.58  | -8.189  |
| P06753 TPM3_HUMAN Tropomyosin alpha-3 chain | 21 |                       | LATALQK                      | 105 | 7  | 0  | 0.96   |                                        | 726.44  | 28.666  | 3632   | 2 | 363.72  | -5.125  |
| P14649 MYL6B_HUMAN Myosin light chain 6B    | 1  |                       | ALGQNPTNAEVLK                | 94  | 13 | 16 | 127.82 | b2b3b4b5*b5b10y2y3y4y5y7y8y9y11*y11y13 | 1354.74 | 45.007  | 159525 | 2 | 677.87  | 2.433   |
| P14649 MYL6B_HUMAN Myosin light chain 6B    | 2  | Carbamidomethyl+C(6)  | ILYSQCQDVMR                  | 83  | 11 | 7  | 47.92  | y2y3y6y8y9*y9y11                       | 1341.63 | 48.637  | 53120  | 2 | 671.32  | 2.639   |
| P14649 MYL6B_HUMAN Myosin light chain 6B    | 3  | Carbamidomethyl+C(19) | MTEEEVETVLAGHEDSNGCINYE AFLK | 176 | 27 | 3  | 11.28  | b3b20y7                                | 3085.36 | 96.473  | 11960  | 3 | 1029.12 | -6.884  |
| P14649 MYL6B_HUMAN Myosin light chain 6B    | 4  |                       | VDFETFLPMLQAVAK              | 121 | 15 | 5  | 24.68  | b3b4*b4b8*b8                           | 1708.89 | 45.751  | 9435   | 3 | 570.30  | -5.072  |
| P14649 MYL6B_HUMAN Myosin light chain 6B    | 5  |                       | AEPVPQAPQK                   | 35  | 11 | 7  | 35.7   | b6*b6b10y4*y4y5*y5                     | 1135.59 | 26.586  | 2469   | 2 | 568.30  | -20.101 |
| P14649 MYL6B_HUMAN Myosin light chain 6B    | 6  |                       | VLGNPKSDELK                  | 107 | 11 | 3  | 22.46  | b4y6y10                                | 1199.67 | 69.571  | 62009  | 2 | 600.34  | 6.105   |
| P14649 MYL6B_HUMAN Myosin light chain 6B    | 7  |                       | VFDKEGNGK                    | 151 | 9  | 3  | 28.49  | b8y5y7                                 | 993.50  | 55.182  | 5402   | 2 | 497.26  | 4.300   |
| P14649 MYL6B_HUMAN Myosin light chain 6B    | 8  | Phosphoryl STY(8)     | KPAGPSISKPAAKPAAAGAPPAK      | 10  | 23 | 3  | 12.12  | b6b9y4                                 | 2163.15 | 132.232 | 5395   | 3 | 721.72  | -5.192  |



|                                          |    |                      |                       |      |    |    |        |                                                                                      |         |         |        |   |         |         |
|------------------------------------------|----|----------------------|-----------------------|------|----|----|--------|--------------------------------------------------------------------------------------|---------|---------|--------|---|---------|---------|
| P14649 MYL6B_HUMAN Myosin light chain 6B | 9  | Phosphoryl STY(9)    | TQEPPVDLSK            | 46   | 10 | 7  | 58.65  | b6b7°b7y3°y3y6y9                                                                     | 1193.54 | 81.885  | 3937   | 2 | 597.27  | 4.398   |
| P14649 MYL6B_HUMAN Myosin light chain 6B | 10 | Phosphoryl STY(5)    | HVLTTLGEEK            | 167  | 9  | 3  | 28.49  | b5b7y3                                                                               | 1077.52 | 34.942  | 1875   | 2 | 539.27  | -1.360  |
| P14649 MYL6B_HUMAN Myosin light chain 6B | 11 | Oxidation+M(9)       | VDFETFLPMLQAVAK       | 121  | 15 | 7  | 36.86  | b4b6b7b11°b11*b11y5                                                                  | 1724.87 | 97.921  | 9447   | 2 | 862.94  | -12.809 |
| Q9Y281 COF2_HUMAN Cofilin-2              | 1  |                      | KEDLVFIFWAPESAPLK     | 95   | 17 | 11 | 74.84  | b2°b2b4b5b6b7y3y7y9y12y17                                                            | 1990.05 | 97.556  | 213128 | 3 | 664.02  | -7.177  |
| Q9Y281 COF2_HUMAN Cofilin-2              | 2  |                      | YALYDATYETK           | 81   | 11 | 10 | 77.04  | b1b2b3b9y4y5y7y9y11                                                                  | 1337.63 | 52.557  | 133669 | 2 | 669.32  | 0.274   |
| Q9Y281 COF2_HUMAN Cofilin-2              | 3  |                      | YALYDATYETKESK        | 81   | 14 | 9  | 55.24  | b7b8y6y7°y7y8°y8y11y14                                                               | 1681.81 | 36.577  | 3063   | 2 | 841.41  | 7.839   |
| Q9Y281 COF2_HUMAN Cofilin-2              | 4  |                      | MIYASSKDAIK           | 114  | 11 | 7  | 35.7   | b2b4b8°b8y2y3y4                                                                      | 1226.65 | 31.591  | 2500   | 3 | 409.56  | 6.966   |
| Q9Y281 COF2_HUMAN Cofilin-2              | 5  | Carbamidomethyl+C(5) | AVLFCLSDDK            | 34   | 10 | 3  | 24.99  | b5y5y9                                                                               | 1167.57 | 55.657  | 4457   | 3 | 389.86  | 0.523   |
| Q9Y281 COF2_HUMAN Cofilin-2              | 6  | Carbamidomethyl+C(6) | KAVLFCLSDDK           | 33   | 11 | 5  | 34.22  | y4y8°y8y10°y10                                                                       | 1295.67 | 36.613  | 14885  | 2 | 648.34  | 1.131   |
| Q9Y281 COF2_HUMAN Cofilin-2              | 7  |                      | MASGVTVNDVIKVFNDMK    | 0    | 19 | 8  | 32.34  | b3b7°b7b9b11y7°y7*y7                                                                 | 2097.05 | 72.456  | 5447   | 3 | 699.69  | 6.753   |
| Q9Y281 COF2_HUMAN Cofilin-2              | 8  | Phosphoryl STY(10)   | QLVGDIGDVEDPYTSFVK    | 53   | 20 | 3  | 21.34  | b11b12y10                                                                            | 2276.05 | 89.720  | 2631   | 3 | 759.35  | -7.080  |
| Q7Z406 MYH14_HUMAN Myosin-14             | 1  |                      | QLLQANPILEAFGNAK      | 236  | 16 | 31 | 183.05 | b2*b2b3*b3b4*b4b5*b5b6*b6b16y1y2y4*y4y5y6y7°y7*y7y8y9y10y11y12*y12y13*y13*y13*y14y16 | 1726.94 | 91.394  | 242617 | 2 | 863.97  | -4.383  |
| Q7Z406 MYH14_HUMAN Myosin-14             | 2  |                      | KEEELQAALAR           | 1104 | 11 | 13 | 121.39 | b4b8b10y2y3y4y5y7y8y9y10y11*y11                                                      | 1257.68 | 42.574  | 93221  | 2 | 629.34  | -1.359  |
| Q7Z406 MYH14_HUMAN Myosin-14             | 3  | Carbamidomethyl+C(1) | CNGVLEGIR             | 717  | 9  | 10 | 58.17  | b1b2*b2b8*b8y1y3y4y5y7                                                               | 1017.51 | 48.819  | 51840  | 2 | 509.26  | -3.179  |
| Q7Z406 MYH14_HUMAN Myosin-14             | 4  |                      | RDLGEELEALR           | 1158 | 11 | 4  | 22.46  | b8y5y10y11                                                                           | 1300.68 | 53.756  | 40231  | 2 | 650.84  | -4.129  |
| Q7Z406 MYH14_HUMAN Myosin-14             | 5  |                      | EEELQAALAR            | 1105 | 10 | 3  | 31.98  | y3y6y7                                                                               | 1129.58 | 49.492  | 29166  | 2 | 565.30  | -1.513  |
| Q7Z406 MYH14_HUMAN Myosin-14             | 6  |                      | ELQTAQAQLSEWR         | 1381 | 13 | 17 | 99.39  | b2b6*b6b8°b8b9b13y3y4°y4y6*y6y8y9*y9y11y13                                           | 1559.78 | 65.848  | 27799  | 2 | 780.40  | 1.252   |
| Q7Z406 MYH14_HUMAN Myosin-14             | 7  |                      | HLRDQADFSVLHYAGK      | 586  | 16 | 8  | 25.44  | b2b3b10b14°b14*b14y2y10                                                              | 1856.97 | 99.814  | 14296  | 2 | 928.99  | 14.528  |
| Q7Z406 MYH14_HUMAN Myosin-14             | 8  |                      | AQTKEQADFALEALAK      | 429  | 16 | 11 | 62.22  | b5b6b7°b7b8b11b15°b15y1y2y16                                                         | 1733.89 | 91.312  | 10694  | 2 | 867.45  | -8.659  |
| Q7Z406 MYH14_HUMAN Myosin-14             | 9  |                      | QEEEAGALEAGEEARR      | 1396 | 16 | 8  | 38.97  | b1b6b8b9y2y7°y7y8                                                                    | 1744.82 | 49.727  | 8967   | 3 | 582.28  | 8.116   |
| Q7Z406 MYH14_HUMAN Myosin-14             | 10 |                      | DEGEEEAVELAESGR       | 71   | 16 | 3  | 23.4   | y3y9y13                                                                              | 1748.75 | 97.378  | 8045   | 3 | 583.59  | 4.817   |
| Q7Z406 MYH14_HUMAN Myosin-14             | 11 |                      | ALEEEQEAAREELER       | 1507 | 14 | 4  | 30.63  | b5b6y5y11                                                                            | 1730.82 | 102.176 | 3665   | 2 | 865.91  | 0.353   |
| Q7Z406 MYH14_HUMAN Myosin-14             | 12 |                      | LAQAEEQLEQETRER       | 1839 | 15 | 4  | 27.13  | b3b4b8y9                                                                             | 1829.89 | 74.456  | 3311   | 2 | 915.45  | -3.469  |
| Q7Z406 MYH14_HUMAN Myosin-14             | 13 |                      | TLEEETR               | 1198 | 7  | 7  | 47.76  | b4°b4b7°b7y3y4y5                                                                     | 877.43  | 34.972  | 2833   | 2 | 439.22  | 7.721   |
| Q7Z406 MYH14_HUMAN Myosin-14             | 14 |                      | EEIFSQNR              | 1685 | 8  | 5  | 31.02  | b1b4y4°y4y5                                                                          | 1022.48 | 41.734  | 2147   | 1 | 1022.48 | -10.028 |
| Q7Z406 MYH14_HUMAN Myosin-14             | 15 |                      | GPSAGGGPGSGTSPQVEWTAR | 32   | 21 | 7  | 27.14  | b15°b15b16b18y14y19°y19                                                              | 1955.90 | 69.449  | 98290  | 3 | 652.64  | -8.987  |
| Q7Z406 MYH14_HUMAN Myosin-14             | 16 |                      | LAQAEEQLEQETR         | 1839 | 13 | 8  | 44.07  | b3b5°b5°b5b6°b6b7y4                                                                  | 1544.79 | 91.278  | 71918  | 2 | 772.90  | 19.835  |
| Q7Z406 MYH14_HUMAN Myosin-14             | 17 |                      | LQQELDDATMDLEQQR      | 1441 | 16 | 3  | 15.7   | b8y7y11                                                                              | 1932.89 | 73.781  | 54097  | 3 | 644.97  | -1.958  |

|                              |    |                       |                        |      |    |    |       |                                    |         |         |       |   |         |         |
|------------------------------|----|-----------------------|------------------------|------|----|----|-------|------------------------------------|---------|---------|-------|---|---------|---------|
| Q7Z406 MYH14_HUMAN Myosin-14 | 18 |                       | EQLEEEAAAR             | 1366 | 10 | 7  | 57.68 | b3*b3b4b6b8y6°y6                   | 1145.56 | 49.836  | 53733 | 2 | 573.28  | 10.656  |
| Q7Z406 MYH14_HUMAN Myosin-14 | 19 |                       | QLPIYTEAIVEMYR         | 149  | 14 | 5  | 35.88 | b3b9y3y7y8                         | 1725.86 | 85.728  | 37928 | 3 | 575.96  | -15.914 |
| Q7Z406 MYH14_HUMAN Myosin-14 | 20 |                       | HEVPPHYAVTEGAYR        | 167  | 16 | 10 | 59.69 | b4°b4b8°b8b9b10b11y6°y6y13         | 1824.87 | 88.575  | 32390 | 2 | 912.94  | -15.586 |
| Q7Z406 MYH14_HUMAN Myosin-14 | 21 |                       | GELEDTLDSTNAQQELR      | 1169 | 17 | 6  | 25.24 | b15y8y9*y9y12*y12                  | 1918.93 | 86.533  | 28056 | 2 | 959.97  | 16.922  |
| Q7Z406 MYH14_HUMAN Myosin-14 | 22 |                       | VQELQQSAR              | 880  | 10 | 5  | 26.75 | b9*b9y8y9°y9                       | 1186.63 | 63.395  | 19813 | 2 | 593.82  | 8.024   |
| Q7Z406 MYH14_HUMAN Myosin-14 | 23 |                       | LGEEDAGAR              | 1817 | 9  | 3  | 28.49 | b3y6y8                             | 917.44  | 51.468  | 11098 | 2 | 459.22  | 4.590   |
| Q7Z406 MYH14_HUMAN Myosin-14 | 24 |                       | FQRPR                  | 581  | 5  | 1  | 12.45 | y3                                 | 703.39  | 51.615  | 10118 | 1 | 703.39  | -13.276 |
| Q7Z406 MYH14_HUMAN Myosin-14 | 25 |                       | AQMASAGQGK             | 1647 | 10 | 4  | 49.2  | y4y5y6y7                           | 948.45  | 36.407  | 9477  | 2 | 474.73  | -6.564  |
| Q7Z406 MYH14_HUMAN Myosin-14 | 26 |                       | GLEAEVLR               | 1700 | 8  | 3  | 34.03 | b5b7y6                             | 886.51  | 27.377  | 8714  | 2 | 443.76  | 17.488  |
| Q7Z406 MYH14_HUMAN Myosin-14 | 27 |                       | LDGESSELQEQMVEQQQR     | 1076 | 18 | 5  | 19.66 | b8°b8b11y3y11                      | 2134.00 | 71.020  | 8233  | 2 | 1067.50 | 14.186  |
| Q7Z406 MYH14_HUMAN Myosin-14 | 28 |                       | LEGELEELK              | 1638 | 9  | 3  | 28.49 | b3y6y8                             | 1059.57 | 63.417  | 7590  | 2 | 530.29  | 9.332   |
| Q7Z406 MYH14_HUMAN Myosin-14 | 29 | Carbamidomethyl+C(8)  | ADLLLEPCSHYR           | 316  | 12 | 5  | 31.71 | b3b8b9y5°y5                        | 1473.73 | 23.893  | 4424  | 3 | 491.91  | 8.615   |
| Q7Z406 MYH14_HUMAN Myosin-14 | 30 |                       | DQLEK                  | 1886 | 5  | 2  | 12.45 | y3°y3                              | 632.32  | 23.345  | 3252  | 1 | 632.32  | -7.239  |
| Q7Z406 MYH14_HUMAN Myosin-14 | 31 |                       | DLGEELEALR             | 1159 | 10 | 5  | 37.44 | b3b6b7°b7y9                        | 1144.58 | 99.813  | 3025  | 1 | 1144.58 | -4.159  |
| Q7Z406 MYH14_HUMAN Myosin-14 | 32 |                       | MVSAVLQFGNIALK         | 367  | 14 | 6  | 36.35 | b4b9*b9b11*b11b12                  | 1490.81 | 58.517  | 2630  | 2 | 745.91  | -20.306 |
| Q7Z406 MYH14_HUMAN Myosin-14 | 33 |                       | AQAELENVSGALNEAESK     | 1301 | 18 | 7  | 37.2  | b7b10*b10b15b16y4y11               | 1859.90 | 90.744  | 2562  | 3 | 620.64  | -1.247  |
| Q7Z406 MYH14_HUMAN Myosin-14 | 34 |                       | QMQTEK                 | 956  | 6  | 1  | 12.93 | y5                                 | 764.36  | 26.508  | 2528  | 1 | 764.36  | 2.236   |
| Q7Z406 MYH14_HUMAN Myosin-14 | 35 |                       | ELEDVTEAESMNR          | 1922 | 14 | 7  | 35.88 | b6°b6b12b13y4°y4y10                | 1609.73 | 73.830  | 2486  | 2 | 805.37  | 19.034  |
| Q7Z406 MYH14_HUMAN Myosin-14 | 36 |                       | AVEER                  | 1483 | 5  | 1  | 12.45 | y3                                 | 603.31  | 60.945  | 2480  | 1 | 603.31  | 5.969   |
| Q7Z406 MYH14_HUMAN Myosin-14 | 37 |                       | MAAVTMSVPGR            | 0    | 11 | 9  | 82.27 | b3b5b6b7b8°b8b9°b9y6               | 1119.56 | 34.974  | 2460  | 2 | 560.28  | -2.944  |
| Q7Z406 MYH14_HUMAN Myosin-14 | 38 |                       | ELSSTEAQLHDAQELLQEETR  | 1325 | 21 | 3  | 21.24 | b10b11y8                           | 2427.22 | 57.820  | 2326  | 4 | 607.56  | 21.425  |
| Q7Z406 MYH14_HUMAN Myosin-14 | 39 |                       | QEEEAGALEAGEEAR        | 1396 | 15 | 4  | 24.68 | y3y11y13°y13                       | 1588.71 | 59.625  | 2294  | 2 | 794.86  | 0.538   |
| Q7Z406 MYH14_HUMAN Myosin-14 | 40 |                       | VAQLEER                | 898  | 8  | 4  | 46.48 | b3b5b6y4                           | 973.47  | 111.372 | 1830  | 1 | 973.47  | -21.881 |
| Q7Z406 MYH14_HUMAN Myosin-14 | 41 |                       | QAQQDR                 | 1721 | 6  | 1  | 12.93 | y3                                 | 745.36  | 58.655  | 1553  | 1 | 745.36  | -2.539  |
| Q7Z406 MYH14_HUMAN Myosin-14 | 42 |                       | AAVTMSVGRK             | 1    | 11 | 7  | 62.14 | b4°b4b5b6b7b10°b10                 | 1116.61 | 32.114  | 31493 | 2 | 558.81  | -10.604 |
| Q7Z406 MYH14_HUMAN Myosin-14 | 43 | Carbamidomethyl+C(3)  | QACEKMIQALELDPNLYR     | 761  | 18 | 5  | 24.5  | b8*b8b9b15y12                      | 2192.07 | 69.509  | 28994 | 3 | 731.36  | -5.457  |
| Q7Z406 MYH14_HUMAN Myosin-14 | 44 |                       | ASISYGSNMRPQSQTWRDR    | 1040 | 19 | 3  | 13.7  | b4y4y6                             | 2240.03 | 78.159  | 25354 | 3 | 747.35  | -13.842 |
| Q7Z406 MYH14_HUMAN Myosin-14 | 45 | Carbamidomethyl+C(15) | LMATLSNTNPSFVRCIVPNHEK | 680  | 22 | 3  | 18.94 | b8b10b19                           | 2528.24 | 108.214 | 23132 | 3 | 843.42  | -13.809 |
| Q7Z406 MYH14_HUMAN Myosin-14 | 46 |                       | RLQQELDDATMDLEQQR      | 1440 | 17 | 12 | 65.04 | b9b10*b10y7°y7*y7y8°y8y9y10°y10y13 | 2089.01 | 72.468  | 17565 | 3 | 697.01  | 6.311   |

|                                          |    |                       |                          |      |    |    |        |                                                             |         |         |        |   |         |         |
|------------------------------------------|----|-----------------------|--------------------------|------|----|----|--------|-------------------------------------------------------------|---------|---------|--------|---|---------|---------|
| Q7Z406 MYH14_HUMAN Myosin-14             | 47 |                       | SFSAKAESGR               | 1794 | 10 | 4  | 24.99  | b3b6y4°y4                                                   | 1039.52 | 64.805  | 9224   | 2 | 520.26  | 3.288   |
| Q7Z406 MYH14_HUMAN Myosin-14             | 48 | Carbamidomethyl+C(12) | FSKAEDMAELTCLNEASVLHNL   | 103  | 23 | 4  | 12.12  | b5°b5b11y10                                                 | 2648.25 | 103.342 | 8302   | 4 | 662.82  | -12.445 |
| Q7Z406 MYH14_HUMAN Myosin-14             | 49 |                       | LGQLEEEEEEQNSSELLNDRYR   | 1754 | 23 | 3  | 12.12  | b15y5y13                                                    | 2793.36 | 93.143  | 7023   | 4 | 699.09  | 14.509  |
| Q7Z406 MYH14_HUMAN Myosin-14             | 50 |                       | SRASISYGSNMRPQSQTW       | 1038 | 19 | 4  | 26.48  | b5b14y6y7                                                   | 2212.08 | 77.952  | 5476   | 2 | 1106.54 | 6.622   |
| Q7Z406 MYH14_HUMAN Myosin-14             | 51 |                       | RHEVPPHVYAVTEGAYR        | 166  | 17 | 7  | 36.82  | b3°b3b4y5°y5y10y13                                          | 1980.98 | 58.024  | 4948   | 4 | 496.00  | -9.983  |
| Q7Z406 MYH14_HUMAN Myosin-14             | 52 |                       | HEVPPHVYAVTEGAYRSMQLDR   | 167  | 22 | 10 | 41.73  | b4b5b9y3y6°y6y8°y8*y8y9                                     | 2555.25 | 111.504 | 4071   | 3 | 852.42  | 3.344   |
| Q7Z406 MYH14_HUMAN Myosin-14             | 53 | Carbamidomethyl+C(9)  | SVHELERACR               | 1542 | 10 | 3  | 24.99  | b5y3y6                                                      | 1256.61 | 35.706  | 3725   | 2 | 628.81  | -6.606  |
| Q7Z406 MYH14_HUMAN Myosin-14             | 54 |                       | AELEALLSSKDDVGK          | 1527 | 15 | 3  | 16.6   | b14y8y10                                                    | 1574.81 | 136.566 | 3567   | 1 | 1574.81 | -11.627 |
| Q7Z406 MYH14_HUMAN Myosin-14             | 55 |                       | EVEETRTSR                | 1676 | 9  | 5  | 28.49  | b3°b3b4°b4y8                                                | 1106.55 | 26.483  | 2799   | 2 | 553.78  | 6.509   |
| Q7Z406 MYH14_HUMAN Myosin-14             | 56 |                       | EQLEEEAAARER             | 1366 | 12 | 4  | 27.71  | b4°b4b9b10                                                  | 1430.71 | 55.134  | 2410   | 3 | 477.57  | 14.249  |
| Q7Z406 MYH14_HUMAN Myosin-14             | 57 |                       | LQQLDDATMDLEQQRLVSTLEK   | 1441 | 24 | 5  | 18.16  | b4°b4*b4b8b10                                               | 2831.43 | 104.704 | 2317   | 2 | 1416.22 | 8.623   |
| Q7Z406 MYH14_HUMAN Myosin-14             | 58 |                       | AQMASAGQGKEEAVK          | 1647 | 15 | 8  | 34.02  | b4*b4b6b12°b12y8y14*y14                                     | 1504.74 | 76.280  | 2097   | 3 | 502.25  | -1.947  |
| Q7Z406 MYH14_HUMAN Myosin-14             | 59 |                       | GELEDTLNSTNAQQLRSK       | 1169 | 19 | 4  | 21.48  | b4y14*y14y15                                                | 2134.03 | 99.816  | 1973   | 3 | 712.02  | 3.432   |
| Q7Z406 MYH14_HUMAN Myosin-14             | 60 |                       | LQRAQAELENVSGALNEAESK    | 1298 | 21 | 7  | 28.57  | b10y5°y5y6y12*y12y18                                        | 2257.11 | 95.453  | 1966   | 2 | 1129.06 | -12.223 |
| Q7Z406 MYH14_HUMAN Myosin-14             | 61 |                       | SLREAQAALAEAQEDLESER     | 1128 | 20 | 5  | 22.63  | y8y13°y13y14*y14                                            | 2216.11 | 89.570  | 1701   | 2 | 1108.56 | 14.432  |
| Q7Z406 MYH14_HUMAN Myosin-14             | 62 |                       | QLEEAEEESRAQAGR          | 1901 | 16 | 3  | 33.1   | b4b5b6                                                      | 1773.83 | 99.869  | 1689   | 2 | 887.42  | -2.753  |
| Q7Z406 MYH14_HUMAN Myosin-14             | 63 |                       | DLQGRDEAGEER             | 1595 | 12 | 6  | 31.71  | b9°b9y4°y4y9y10                                             | 1374.64 | 42.653  | 1680   | 2 | 687.82  | 12.344  |
| Q7Z406 MYH14_HUMAN Myosin-14             | 64 |                       | LAQAEEQLQETRER           | 1839 | 15 | 3  | 16.6   | b11b13y11                                                   | 1829.92 | 90.684  | 1565   | 3 | 610.64  | 10.073  |
| Q7Z406 MYH14_HUMAN Myosin-14             | 65 |                       | EAQAALAEAQEDLESERVAR     | 1131 | 20 | 6  | 20.69  | b4°b4*b4b7b12y11                                            | 2186.09 | 78.498  | 1503   | 3 | 729.37  | 7.594   |
| Q7Z406 MYH14_HUMAN Myosin-14             | 66 | Phosphoryl STY(4)     | ELQTAQAQLSEWR            | 1381 | 13 | 5  | 40.64  | y6y8y9*y9y10_H3PO4 y10                                      | 1639.76 | 67.635  | 19771  | 2 | 820.38  | 11.911  |
| Q7Z406 MYH14_HUMAN Myosin-14             | 67 | Phosphoryl STY(12)    | DVEGIVGLEQVSSLGDGPPGGRPR | 639  | 24 | 3  | 11.85  | b12y10y12                                                   | 2471.20 | 99.802  | 6470   | 3 | 824.40  | 5.533   |
| Q7Z406 MYH14_HUMAN Myosin-14             | 68 | Oxidation+M(5)        | MQAQMKELWREVEETR         | 1666 | 16 | 8  | 77.68  | b3b5b6*b6b7b10b11b12                                        | 2080.01 | 108.158 | 62184  | 2 | 1040.51 | 8.451   |
| Q7Z406 MYH14_HUMAN Myosin-14             | 69 | Oxidation+M(2)        | AMEAEAAGLREQLEEEAAARER   | 1356 | 22 | 5  | 21.18  | b11°b11b12y12*y12                                           | 2446.14 | 82.759  | 7701   | 2 | 1223.57 | -11.278 |
| Q7Z406 MYH14_HUMAN Myosin-14             | 70 | Oxidation+M(1)        | MAAVTMSVPR               | 0    | 11 | 7  | 69.82  | b4b5°b5b7b8b10y7                                            | 1135.55 | 83.237  | 2511   | 2 | 568.28  | -7.095  |
| Q7Z406 MYH14_HUMAN Myosin-14             | 71 | Oxidation+M(9)        | ASISYGSNMRPQSQTW         | 1040 | 17 | 5  | 33.22  | b6b7b13b15y15                                               | 1984.93 | 71.083  | 2488   | 3 | 662.31  | -1.292  |
| Q7Z406 MYH14_HUMAN Myosin-14             | 72 | Oxidation+M(2)        | NMDPLNDNVALLHQSTDR       | 613  | 19 | 5  | 26.64  | b10b13y4y6y12                                               | 2140.00 | 89.781  | 1806   | 3 | 714.00  | -5.476  |
| Q7Z406 MYH14_HUMAN Myosin-14             | 73 |                       | EEIFSQNR                 | 1685 | 8  | 3  | 23.34  | b6b7°b7                                                     | 1004.48 | 41.798  | 2463   | 2 | 502.74  | 4.618   |
| P02671 FIBA_HUMAN Fibrinogen alpha chain | 1  |                       | MELERPGNEITR             | 258  | 13 | 22 | 116.61 | b2b3b5°b5b7b10°b10*b10y1y2°y2y3y6°y6y8°y8*y8y9y10*y10y11y13 | 1501.74 | 41.798  | 178412 | 3 | 501.25  | -4.227  |

|                                           |    |                       |                                   |     |    |    |        |                                               |         |         |        |   |         |         |
|-------------------------------------------|----|-----------------------|-----------------------------------|-----|----|----|--------|-----------------------------------------------|---------|---------|--------|---|---------|---------|
| [P02671 FIBA_HUMAN Fibrinogen alpha chain | 2  |                       | GLIDEVNQDFTNR                     | 71  | 13 | 17 | 115.15 | b3b5°b5b13y2y3y4*y4y5y7y8*y8y9y10y11y13*y13   | 1520.74 | 69.589  | 122010 | 2 | 760.87  | 2.328   |
| [P02671 FIBA_HUMAN Fibrinogen alpha chain | 3  |                       | ALTDMPQMR                         | 249 | 9  | 4  | 51.73  | y3y4y5y7                                      | 1062.51 | 51.009  | 85579  | 2 | 531.76  | -0.919  |
| [P02671 FIBA_HUMAN Fibrinogen alpha chain | 4  |                       | TFPGFFSPMLGEFVSETESR              | 527 | 20 | 17 | 105.84 | b2b3b11°b11b15°b15y1y4y5y6y7y8y10y13y14y18y20 | 2265.06 | 109.308 | 74494  | 2 | 1133.03 | 3.449   |
| [P02671 FIBA_HUMAN Fibrinogen alpha chain | 5  |                       | NSLFEYQK                          | 89  | 8  | 13 | 58.93  | b1b2°b2b3y2*y2y4°y4y5y6*y6y7y8                | 1028.50 | 50.451  | 68144  | 2 | 514.75  | -7.596  |
| [P02671 FIBA_HUMAN Fibrinogen alpha chain | 6  |                       | GSESGIFTNTK                       | 547 | 11 | 4  | 29.45  | y5y7y8y11                                     | 1140.56 | 40.970  | 62511  | 2 | 570.78  | 1.712   |
| [P02671 FIBA_HUMAN Fibrinogen alpha chain | 7  |                       | TVIGPDGHKEVTK                     | 467 | 13 | 7  | 55.32  | y2y3y6y7y8y10y13                              | 1380.74 | 24.424  | 46362  | 3 | 460.92  | -7.515  |
| [P02671 FIBA_HUMAN Fibrinogen alpha chain | 8  |                       | DSHSLTTNIMEILR                    | 100 | 14 | 5  | 17.67  | b6b8y1y3y14                                   | 1629.83 | 87.766  | 39802  | 2 | 815.42  | 0.000   |
| [P02671 FIBA_HUMAN Fibrinogen alpha chain | 9  |                       | GDFSSANNRNTYNR                    | 114 | 15 | 7  | 51.74  | b7y3y5*y5y6y10y13                             | 1730.74 | 26.409  | 35081  | 3 | 577.59  | -2.469  |
| [P02671 FIBA_HUMAN Fibrinogen alpha chain | 10 |                       | ESSSHHPGIAEFPSR                   | 558 | 15 | 15 | 72.17  | b6°b6b10°b10b11°b11b15y3°y3y4y5y8°y8y9y15     | 1637.75 | 38.867  | 33685  | 3 | 546.59  | -7.528  |
| [P02671 FIBA_HUMAN Fibrinogen alpha chain | 11 |                       | GGSTSYGTGSETESPR                  | 271 | 16 | 7  | 32.84  | b2y5y9y10y12°y12y16                           | 1572.68 | 25.774  | 26010  | 2 | 786.85  | 3.881   |
| [P02671 FIBA_HUMAN Fibrinogen alpha chain | 12 | Carbamidomethyl+C(11) | EVVTSEDEGSDCPEAMDGLTSLSGIG TLDGFR | 480 | 30 | 5  | 17.38  | b3b5b8y7y13                                   | 3128.40 | 87.999  | 9760   | 3 | 1043.47 | -1.015  |
| [P02671 FIBA_HUMAN Fibrinogen alpha chain | 13 |                       | VTSGSTTTTRR                       | 448 | 11 | 5  | 34.12  | b4°b4b8b9y3                                   | 1166.60 | 34.233  | 8762   | 3 | 389.54  | -10.359 |
| [P02671 FIBA_HUMAN Fibrinogen alpha chain | 14 |                       | TVIGPDGHK                         | 467 | 9  | 5  | 36.27  | b6°b6b7b8b9                                   | 923.49  | 34.963  | 3266   | 2 | 462.25  | -7.601  |
| [P02671 FIBA_HUMAN Fibrinogen alpha chain | 15 |                       | MKVPVPLVPGNFK                     | 225 | 13 | 4  | 28.19  | y5*y5y8y11                                    | 1441.78 | 63.957  | 55440  | 3 | 481.26  | -7.535  |
| [P02671 FIBA_HUMAN Fibrinogen alpha chain | 16 |                       | IEVLK                             | 137 | 5  | 2  | 24.91  | b3b4                                          | 601.39  | 61.226  | 25693  | 1 | 601.39  | 3.248   |
| [P02671 FIBA_HUMAN Fibrinogen alpha chain | 17 |                       | GSVLR                             | 720 | 5  | 1  | 12.45  | b4                                            | 531.33  | 22.649  | 10189  | 1 | 531.33  | 4.940   |
| [P02671 FIBA_HUMAN Fibrinogen alpha chain | 18 |                       | NPSSAGSWNSGSSGPGSTGNR             | 287 | 21 | 9  | 33.65  | b3*b3b9y4*y4y6y11*y11y13                      | 1963.88 | 44.968  | 1895   | 2 | 982.44  | 15.415  |
| [P02671 FIBA_HUMAN Fibrinogen alpha chain | 19 |                       | MDGSLNFNRR                        | 678 | 9  | 6  | 42.7   | b8y4y6°y6*y6y7                                | 1053.46 | 41.842  | 1803   | 2 | 527.24  | -13.673 |
| [P02671 FIBA_HUMAN Fibrinogen alpha chain | 20 |                       | HPDEAAFFDTASTGK                   | 512 | 15 | 5  | 27.13  | b5b6°b6b12y8                                  | 1593.69 | 44.163  | 1569   | 2 | 797.35  | -17.464 |
| [P02671 FIBA_HUMAN Fibrinogen alpha chain | 21 |                       | LVTSKGDK                          | 432 | 8  | 3  | 34.03  | b6y3y7                                        | 847.50  | 27.833  | 253496 | 2 | 424.25  | 9.363   |
| [P02671 FIBA_HUMAN Fibrinogen alpha chain | 22 |                       | QFTSSTS YNRGDSTFESK               | 581 | 18 | 6  | 24.5   | b3°b3°b3y4y8y9                                | 2041.90 | 39.340  | 45245  | 3 | 681.31  | -3.647  |
| [P02671 FIBA_HUMAN Fibrinogen alpha chain | 23 |                       | SSSYSKQFTSSTS YNR                 | 575 | 16 | 3  | 15.7   | b13y7y12                                      | 1829.85 | 60.909  | 27214  | 2 | 915.43  | 8.673   |
| [P02671 FIBA_HUMAN Fibrinogen alpha chain | 24 |                       | HRHPDEAAFFDTASTGK                 | 510 | 17 | 4  | 25.24  | b3b13b14y13                                   | 1886.87 | 84.057  | 23971  | 3 | 629.63  | -4.982  |
| [P02671 FIBA_HUMAN Fibrinogen alpha chain | 25 |                       | NSLFEYQKNNK                       | 89  | 11 | 4  | 35.7   | b8b9y3y10                                     | 1384.69 | 89.209  | 9881   | 2 | 692.85  | 2.909   |
| [P02671 FIBA_HUMAN Fibrinogen alpha chain | 26 |                       | VPPEWKALTDMPQMR                   | 243 | 15 | 3  | 16.6   | b4y3y8                                        | 1798.90 | 70.284  | 8817   | 2 | 899.95  | 1.493   |
| [P02671 FIBA_HUMAN Fibrinogen alpha chain | 27 |                       | DSHSLTTNIMEILRGDFSSANNR           | 100 | 23 | 9  | 36.98  | b6b9°b9b12b13°b13y6y8y13                      | 2578.26 | 109.315 | 5417   | 4 | 645.32  | 10.416  |
| [P02671 FIBA_HUMAN Fibrinogen alpha chain | 28 |                       | DNTYNRVSEDLR                      | 123 | 12 | 5  | 20.51  | b7°b7b10y5°y5                                 | 1481.71 | 58.023  | 3559   | 3 | 494.57  | 6.920   |
| [P02671 FIBA_HUMAN Fibrinogen alpha chain | 29 | Carbamidomethyl+C(6)  | IFSVYCDQETSLGGWLLIQQRMD GSLNFNRR  | 657 | 30 | 3  | 10.98  | b8b11y10                                      | 3547.71 | 94.932  | 2502   | 3 | 1183.24 | 1.170   |

|                                          |    |                       |                                         |     |    |    |       |                                             |         |         |        |   |         |         |
|------------------------------------------|----|-----------------------|-----------------------------------------|-----|----|----|-------|---------------------------------------------|---------|---------|--------|---|---------|---------|
| P02671 FIBA_HUMAN Fibrinogen alpha chain | 30 |                       | MKGLIDEVNQDFTNR                         | 69  | 15 | 5  | 23.49 | b5b11y4*y4y8                                | 1779.88 | 53.173  | 2245   | 3 | 593.97  | 7.681   |
| P02671 FIBA_HUMAN Fibrinogen alpha chain | 31 |                       | NNKDSHSLTTNIMEILR                       | 97  | 17 | 9  | 70.38 | b3b6b8b9b11b12*b12b13*b13                   | 1986.02 | 80.105  | 1862   | 3 | 662.68  | 8.298   |
| P02671 FIBA_HUMAN Fibrinogen alpha chain | 32 |                       | MELERPGGNEITRGGSTSYGTGSE<br>TESPR       | 258 | 29 | 6  | 23.11 | b3*b3b4b11y4y8                              | 3055.39 | 93.532  | 1622   | 4 | 764.60  | -5.434  |
| P02671 FIBA_HUMAN Fibrinogen alpha chain | 33 |                       | EVDLKDYEDQQK                            | 190 | 12 | 5  | 20.51 | b4*b4b10*b10y6                              | 1509.69 | 41.854  | 1561   | 2 | 755.35  | -11.886 |
| P02671 FIBA_HUMAN Fibrinogen alpha chain | 34 | Phosphoryl STY()      | GSESGIFTNTKESSSHHPGIAEFPS<br>R          | 547 | 26 | 9  | 38.03 | b3b9_H3PO4<br>b9b11*b11b12y5y12*y12y13      | 2839.22 | 73.018  | 7877   | 4 | 710.56  | -13.156 |
| P02671 FIBA_HUMAN Fibrinogen alpha chain | 35 | Oxidation+M(8)        | ALTDMPQMR                               | 249 | 9  | 7  | 42.19 | b4*b4b7*b7y3*y3y8                           | 1078.50 | 46.888  | 46046  | 2 | 539.75  | -4.414  |
| P02671 FIBA_HUMAN Fibrinogen alpha chain | 36 | Oxidation+M(9)        | TFPGFFSPMLGEFVSETESR                    | 527 | 20 | 5  | 29.51 | b9y3y4y6y12                                 | 2281.07 | 105.334 | 21364  | 2 | 1141.04 | 8.991   |
| P02671 FIBA_HUMAN Fibrinogen alpha chain | 37 |                       | IGPDGHKEVTK                             | 469 | 11 | 0  | 3.84  |                                             | 1180.63 | 24.421  | 23963  | 2 | 590.82  | -0.310  |
| P02671 FIBA_HUMAN Fibrinogen alpha chain | 38 |                       | GPDGHKEVTK                              | 470 | 10 | 1  | 7.26  | b9                                          | 1067.55 | 24.434  | 11754  | 2 | 534.28  | 4.574   |
| P02671 FIBA_HUMAN Fibrinogen alpha chain | 39 |                       | LERPGGNEITR                             | 260 | 11 | 4  | 15.53 | b3b8*b8*b8                                  | 1241.64 | 41.809  | 5292   | 2 | 621.33  | -12.289 |
| P02671 FIBA_HUMAN Fibrinogen alpha chain | 40 |                       | MELERPG                                 | 258 | 7  | 0  | 3.84  |                                             | 831.41  | 41.821  | 2347   | 2 | 416.21  | 11.526  |
| P02671 FIBA_HUMAN Fibrinogen alpha chain | 41 |                       | NSLFEYQK                                | 89  | 8  | 0  | 1.44  |                                             | 1011.48 | 50.408  | 2739   | 2 | 506.24  | 3.319   |
| P31146 COR1A_HUMAN Coronin-1A            | 1  |                       | YFEITSEAPFLHYLSMFSSK                    | 293 | 20 | 10 | 56.23 | b3*b3b7y3y6y8y9y12y13y20                    | 2397.14 | 108.033 | 34462  | 3 | 799.72  | -1.120  |
| P31146 COR1A_HUMAN Coronin-1A            | 2  |                       | AAPEASGTPSSDAVSR                        | 416 | 16 | 13 | 94.12 | b2y2y5y7y8y9y10y11*y11y12*y12y14y16         | 1502.71 | 27.910  | 21717  | 2 | 751.86  | 1.950   |
| P31146 COR1A_HUMAN Coronin-1A            | 3  | Carbamidomethyl+C(32) | HLEELSLQLQELDTSSGVLLPFFDPD<br>TNIVYLCGK | 253 | 34 | 16 | 53.03 | b3*b3b4*b4b6*b6b7*b7b10y2y<br>3y5y6y8y15y34 | 3846.93 | 111.383 | 13233  | 3 | 1282.98 | 5.014   |
| P31146 COR1A_HUMAN Coronin-1A            | 4  |                       | SDLFQEDLYPPTAGPDPALTAEEW<br>LGGR        | 355 | 28 | 6  | 23.44 | b5b6b17y7*y7y9                              | 3045.47 | 81.806  | 6905   | 4 | 762.12  | 8.257   |
| P31146 COR1A_HUMAN Coronin-1A            | 5  |                       | GLDTGRR                                 | 408 | 7  | 8  | 53.78 | b2b3*b3b5*b5y5*y5y6                         | 774.42  | 41.814  | 3183   | 2 | 387.71  | -8.276  |
| P31146 COR1A_HUMAN Coronin-1A            | 6  | Carbamidomethyl+C(11) | VSQTTWDSGFCAVNPK                        | 29  | 16 | 5  | 35.14 | b13y10y11*y11y12                            | 1796.84 | 61.419  | 19402  | 2 | 898.92  | 7.337   |
| P31146 COR1A_HUMAN Coronin-1A            | 7  |                       | DRPHEGTRPVR                             | 214 | 11 | 3  | 29.45 | b6b8b9                                      | 1319.69 | 51.245  | 10986  | 2 | 660.35  | 0.278   |
| P31146 COR1A_HUMAN Coronin-1A            | 8  |                       | HVFGQPAK                                | 12  | 8  | 5  | 54.26 | b3b4b6b7*b7                                 | 883.47  | 34.980  | 9103   | 2 | 442.24  | -10.225 |
| P31146 COR1A_HUMAN Coronin-1A            | 9  |                       | GDSSIR                                  | 287 | 6  | 2  | 12.93 | y5*y5                                       | 634.32  | 85.967  | 2206   | 1 | 634.32  | 0.481   |
| P31146 COR1A_HUMAN Coronin-1A            | 10 | Carbamidomethyl+C(6)  | FVALICEASGGGAFLVPLGK                    | 45  | 21 | 3  | 12.79 | b6b14y4                                     | 2119.16 | 132.208 | 1918   | 3 | 707.06  | 1.037   |
| P31146 COR1A_HUMAN Coronin-1A            | 11 | Carbamidomethyl+C(12) | HVFGQPAKADQCYEDVR                       | 12  | 17 | 7  | 33.22 | b6b7*b7b10b14y10*y10                        | 2019.96 | 54.272  | 449791 | 3 | 673.99  | 12.570  |
| P31146 COR1A_HUMAN Coronin-1A            | 12 |                       | KSDLFQEDLYPPTAGPDPALTAEE<br>WLGGRR      | 354 | 29 | 13 | 82.04 | b9b10b11b14*b14y3y4y7y9y1<br>2y14y15y19     | 3173.55 | 95.372  | 56550  | 3 | 1058.52 | 2.462   |
| P31146 COR1A_HUMAN Coronin-1A            | 13 |                       | LDRLEETVQAK                             | 450 | 11 | 3  | 22.46 | b8y3y7                                      | 1301.70 | 63.350  | 16088  | 2 | 651.35  | -7.315  |
| P31146 COR1A_HUMAN Coronin-1A            | 14 |                       | YFEITSEAPFLHYLSMFSSKESQR                | 293 | 24 | 5  | 21.8  | b11b12b22y10*y10                            | 2897.36 | 136.432 | 7081   | 2 | 1449.19 | -6.151  |
| P31146 COR1A_HUMAN Coronin-1A            | 15 | Carbamidomethyl+C(7)  | GLEVNKCEIAR                             | 325 | 11 | 5  | 35.7  | b5b9*b9y5y6                                 | 1288.68 | 71.796  | 5706   | 2 | 644.84  | 10.988  |
| P31146 COR1A_HUMAN Coronin-1A            | 16 |                       | DGYVPPKSR                               | 393 | 9  | 3  | 28.49 | b6b7y5                                      | 1018.53 | 29.258  | 4036   | 2 | 509.77  | 1.678   |
| P31146 COR1A_HUMAN Coronin-1A            | 17 | Carbamidomethyl+C(2)  | RCEPIAMTVPR                             | 343 | 11 | 3  | 22.46 | b3b7y4                                      | 1329.67 | 47.330  | 2935   | 3 | 443.89  | -5.692  |

|                                    |    |                                         |                               |     |    |    |        |                                                                      |         |         |        |   |        |         |
|------------------------------------|----|-----------------------------------------|-------------------------------|-----|----|----|--------|----------------------------------------------------------------------|---------|---------|--------|---|--------|---------|
| P31146 COR1A_HUMAN Coronin-1A      | 18 |                                         | RAAPEASGTPSSDAVSR             | 415 | 17 | 4  | 22.33  | b5b7*b7b15                                                           | 1658.79 | 98.799  | 2336   | 2 | 829.90 | -10.008 |
| P31146 COR1A_HUMAN Coronin-1A      | 19 | Oxidation+M(16)                         | YFEITSEAPFLHYLSMFSSK          | 293 | 20 | 7  | 34.14  | b5*b5b9b10b19y6y8                                                    | 2413.15 | 102.357 | 8416   | 3 | 805.06 | 4.957   |
| P31146 COR1A_HUMAN Coronin-1A      | 20 | Carbamidomethyl+C(1);<br>Oxidation+M(6) | CEPIAMTVPR                    | 344 | 10 | 3  | 24.99  | b4b9y6                                                               | 1189.58 | 36.517  | 3852   | 2 | 595.30 | 11.185  |
| P31146 COR1A_HUMAN Coronin-1A      | 21 | Oxidation+M(2)                          | GMGYMPKR                      | 317 | 8  | 3  | 34.03  | b3b7y6                                                               | 955.45  | 34.952  | 1909   | 2 | 478.23 | 4.088   |
| O43707 ACTN4_HUMAN Alpha-actinin-4 | 1  |                                         | VGWEQLLTIAR                   | 733 | 12 | 22 | 142.01 | b2b3b5*b5b6*b6*b6b8y1y2y3<br>y4y5y6*y6y7y8*y8y9*y9y1y1<br>2          | 1386.77 | 97.916  | 209566 | 2 | 693.89 | -2.993  |
| O43707 ACTN4_HUMAN Alpha-actinin-4 | 2  |                                         | AIMTYVSSFYHAFSGAQK            | 255 | 18 | 23 | 132.16 | b2b3b5*b5b11y1y2*y2y4*y4y<br>5y6y7y8*y8y9y11y12*y12y13y<br>16*y16y18 | 2007.95 | 90.418  | 148514 | 3 | 669.99 | -9.058  |
| O43707 ACTN4_HUMAN Alpha-actinin-4 | 3  |                                         | TINEVENQILTR                  | 745 | 12 | 10 | 66.73  | b3b9b10*b10y1y3y4y6y10y12                                            | 1429.77 | 59.895  | 110286 | 2 | 715.39 | 0.854   |
| O43707 ACTN4_HUMAN Alpha-actinin-4 | 4  |                                         | LASDLEWIR                     | 300 | 10 | 5  | 24.99  | b8y2y3y8y10                                                          | 1215.67 | 92.047  | 92033  | 2 | 608.34 | -3.414  |
| O43707 ACTN4_HUMAN Alpha-actinin-4 | 5  | Carbamidomethyl+C(1)                    | CQLEINFNTLQTK                 | 350 | 13 | 9  | 38.11  | b2*b2b3b4b11y1y9y11y13                                               | 1608.81 | 70.243  | 39108  | 2 | 804.91 | 4.856   |
| O43707 ACTN4_HUMAN Alpha-actinin-4 | 6  | Carbamidomethyl+C(2)                    | ICDQWDALGSLTHSR               | 497 | 15 | 4  | 16.6   | b12*b12y3y13                                                         | 1758.82 | 69.440  | 7632   | 3 | 586.94 | -4.303  |
| O43707 ACTN4_HUMAN Alpha-actinin-4 | 7  |                                         | MAPYQGPDAVPGALDYK             | 882 | 17 | 4  | 25.24  | b10b12b13y11                                                         | 1792.84 | 73.604  | 4116   | 2 | 896.92 | -11.166 |
| O43707 ACTN4_HUMAN Alpha-actinin-4 | 8  |                                         | IMSLVDPNHSGLVTFQAFIDFMSR      | 813 | 24 | 6  | 25.2   | b2b9b10b14y5y8                                                       | 2725.34 | 119.123 | 4076   | 3 | 909.12 | -1.702  |
| O43707 ACTN4_HUMAN Alpha-actinin-4 | 9  |                                         | HTNYTMEHIR                    | 723 | 10 | 3  | 24.99  | b4b9y9                                                               | 1301.60 | 31.969  | 4043   | 3 | 434.54 | -3.189  |
| O43707 ACTN4_HUMAN Alpha-actinin-4 | 10 |                                         | FAIQDISVEETSAK                | 152 | 14 | 8  | 29.15  | b2b5*b5b9*b9b12y5*y5                                                 | 1537.78 | 74.458  | 3444   | 2 | 769.39 | 4.445   |
| O43707 ACTN4_HUMAN Alpha-actinin-4 | 11 | Carbamidomethyl+C(10)                   | ELPPDQAEYCIAR                 | 869 | 13 | 5  | 31.98  | b6b8*b8y5y6                                                          | 1561.75 | 34.888  | 2678   | 2 | 781.38 | 9.849   |
| O43707 ACTN4_HUMAN Alpha-actinin-4 | 12 |                                         | VLAVNQENEHLMEDYEK             | 283 | 17 | 5  | 34.78  | b2b9b10b11y5                                                         | 2060.97 | 93.098  | 2459   | 3 | 687.66 | 6.397   |
| O43707 ACTN4_HUMAN Alpha-actinin-4 | 13 |                                         | NFITAEELR                     | 859 | 9  | 8  | 36.27  | b1b3*b3b5b6b9y9*y9                                                   | 1092.58 | 39.977  | 2152   | 2 | 546.79 | 10.949  |
| O43707 ACTN4_HUMAN Alpha-actinin-4 | 14 |                                         | DHGGALGPEEFK                  | 779 | 12 | 6  | 34.72  | b2b3b5b7*b7y4                                                        | 1256.58 | 31.577  | 2137   | 3 | 419.53 | -5.537  |
| O43707 ACTN4_HUMAN Alpha-actinin-4 | 15 |                                         | VEQIAAIAQELNELDYDSDSHNVN<br>R | 469 | 25 | 10 | 59.23  | b3b4*b4b5*b5b6*b6y6*y6y7                                             | 2905.41 | 89.665  | 20710  | 3 | 969.14 | 4.118   |
| O43707 ACTN4_HUMAN Alpha-actinin-4 | 16 |                                         | ETD TD TADQVIASFK             | 837 | 16 | 6  | 31.77  | b3b13y3*y3y11y15                                                     | 1741.80 | 88.542  | 14456  | 3 | 581.27 | -6.868  |
| O43707 ACTN4_HUMAN Alpha-actinin-4 | 17 |                                         | MLDAEDIVNTARPDEK              | 239 | 16 | 6  | 34.88  | b4y3y6*y6y7y9                                                        | 1816.86 | 95.575  | 12141  | 2 | 908.93 | -9.742  |
| O43707 ACTN4_HUMAN Alpha-actinin-4 | 18 |                                         | NVNVQNFHISWK                  | 181 | 12 | 5  | 20.51  | b6b11*b11*b11y11                                                     | 1485.76 | 61.877  | 10367  | 2 | 743.39 | 3.286   |
| O43707 ACTN4_HUMAN Alpha-actinin-4 | 19 |                                         | QGAEAFNR                      | 805 | 8  | 3  | 34.03  | b3b7y4                                                               | 950.44  | 39.442  | 10254  | 2 | 475.72 | 8.413   |
| O43707 ACTN4_HUMAN Alpha-actinin-4 | 20 | Carbamidomethyl+C(2)                    | ACLISLGYDVENDR                | 791 | 14 | 6  | 35.88  | b5b10y5*y5y6y13                                                      | 1624.77 | 71.069  | 9809   | 2 | 812.89 | 2.855   |
| O43707 ACTN4_HUMAN Alpha-actinin-4 | 21 |                                         | MVSDINNGWQHLEQAEK             | 378 | 17 | 14 | 82.66  | b3*b3b5*b5b7*b7b8b9*b9b10b<br>16y8y10*y10                            | 1998.89 | 42.688  | 7796   | 3 | 666.97 | -20.824 |
| O43707 ACTN4_HUMAN Alpha-actinin-4 | 22 |                                         | IAESNHK                       | 596 | 8  | 4  | 34.03  | b4*b4b7y5                                                            | 911.49  | 56.747  | 4444   | 2 | 456.25 | -10.178 |
| O43707 ACTN4_HUMAN Alpha-actinin-4 | 23 |                                         | AGTQIENIDEDFR                 | 66  | 13 | 7  | 50.57  | b5b6b9b11*b11y3y8                                                    | 1507.73 | 47.915  | 3628   | 3 | 503.25 | 21.537  |
| O43707 ACTN4_HUMAN Alpha-actinin-4 | 24 |                                         | DDPVTNLNNAFEVAEK              | 217 | 16 | 8  | 53.35  | b7b8b9b12b13*b13y6*y6                                                | 1775.88 | 54.598  | 3229   | 2 | 888.44 | 17.804  |

|                                                |    |                       |                                    |      |    |    |        |                                                                                                  |         |         |        |   |         |         |
|------------------------------------------------|----|-----------------------|------------------------------------|------|----|----|--------|--------------------------------------------------------------------------------------------------|---------|---------|--------|---|---------|---------|
| O43707 ACTN4_HUMAN Alpha-actinin-4             | 25 |                       | LVSIGAEIVDGNNAK                    | 125  | 15 | 4  | 24.68  | y5*y5y9y12                                                                                       | 1514.78 | 97.436  | 2819   | 2 | 757.89  | -17.084 |
| O43707 ACTN4_HUMAN Alpha-actinin-4             | 26 |                       | STLPDADR                           | 574  | 8  | 3  | 34.03  | b7y5y7                                                                                           | 874.42  | 85.590  | 1980   | 1 | 874.42  | -12.913 |
| O43707 ACTN4_HUMAN Alpha-actinin-4             | 27 | Carbamidomethyl+C(2)  | ACLISLGYDVENDRQGEAEFNR             | 791  | 22 | 3  | 12.43  | b3y9y17                                                                                          | 2556.19 | 56.914  | 227156 | 3 | 852.73  | 3.534   |
| O43707 ACTN4_HUMAN Alpha-actinin-4             | 28 |                       | KDDPVTNLNNAFEVAEK                  | 216  | 17 | 6  | 45.22  | b3b4b6b10b14y3                                                                                   | 1903.94 | 71.062  | 15633  | 2 | 952.47  | 1.090   |
| O43707 ACTN4_HUMAN Alpha-actinin-4             | 29 |                       | AGTQIENIDEDFRDGLK                  | 66   | 17 | 4  | 14.93  | b4b11y11*y11                                                                                     | 1920.96 | 83.227  | 11812  | 3 | 640.99  | 14.616  |
| O43707 ACTN4_HUMAN Alpha-actinin-4             | 30 |                       | VLAVNQENEHLMEDYEKLASDLL<br>EWIR    | 283  | 27 | 3  | 21.28  | b6y3y4                                                                                           | 3257.61 | 85.937  | 9042   | 3 | 1086.54 | -2.623  |
| O43707 ACTN4_HUMAN Alpha-actinin-4             | 31 |                       | DAKGISQEQMQEFR                     | 757  | 14 | 9  | 35.88  | b4*b4b10*b10y6*y6y8y9*y9                                                                         | 1666.79 | 43.732  | 5171   | 4 | 417.45  | 2.124   |
| O43707 ACTN4_HUMAN Alpha-actinin-4             | 32 |                       | MAPYQGPDAVPGALDYKSFSTAL<br>YGESDL  | 882  | 29 | 3  | 11.05  | b5b11y5                                                                                          | 3063.40 | 51.917  | 2861   | 3 | 1021.80 | -10.440 |
| O43707 ACTN4_HUMAN Alpha-actinin-4             | 33 | Carbamidomethyl+C(10) | ELPPDQAEYCIARMAPYQGPDAV<br>PGALDYK | 869  | 30 | 5  | 13     | b7b13y5*y5y14                                                                                    | 3335.52 | 96.493  | 2655   | 4 | 834.64  | -14.639 |
| O43707 ACTN4_HUMAN Alpha-actinin-4             | 34 |                       | DHALLEEQSKQSQSNEHLR                | 633  | 18 | 17 | 65.12  | b7b8*b8b10*b10*b10b11*b11<br>b12*b12y5*y5y7*y7*y7y12*y<br>12                                     | 2162.03 | 96.007  | 2178   | 3 | 721.35  | -11.857 |
| O43707 ACTN4_HUMAN Alpha-actinin-4             | 35 |                       | RDHALLEEQSK                        | 632  | 11 | 3  | 22.46  | b3y6y8                                                                                           | 1325.69 | 71.038  | 2154   | 2 | 663.35  | 6.538   |
| O43707 ACTN4_HUMAN Alpha-actinin-4             | 36 |                       | ASIHEAWTDGKEAMLK                   | 421  | 16 | 6  | 38.97  | b12b13y8y9y13*y13                                                                                | 1786.86 | 95.407  | 1637   | 2 | 893.93  | -12.843 |
| O43707 ACTN4_HUMAN Alpha-actinin-4             | 37 | Phosphoryl STY(8)     | DYETATLSDIK                        | 439  | 11 | 4  | 25.47  | b5b6y4*y4                                                                                        | 1335.57 | 31.535  | 3830   | 2 | 668.29  | 3.016   |
| O43707 ACTN4_HUMAN Alpha-actinin-4             | 38 | Phosphoryl STY(10)    | HRDYETATLSDIK                      | 437  | 13 | 3  | 18.95  | b7b9y5                                                                                           | 1628.73 | 82.712  | 3812   | 2 | 814.87  | 3.673   |
| O43707 ACTN4_HUMAN Alpha-actinin-4             | 39 | Oxidation+M(8)        | LSNRPAFMPSEGG                      | 365  | 13 | 8  | 27.21  | b3*b3*b3b8*b8y7y12*y12                                                                           | 1449.72 | 59.995  | 27963  | 3 | 483.91  | 1.768   |
| O43707 ACTN4_HUMAN Alpha-actinin-4             | 40 | Oxidation+M(7)        | GISQEQMQEFR                        | 760  | 11 | 3  | 22.46  | b8y3y9                                                                                           | 1368.62 | 32.554  | 3695   | 2 | 684.81  | 0.981   |
| O43707 ACTN4_HUMAN Alpha-actinin-4             | 41 | Oxidation+M(1)        | MVSDINNGWQHLEQAEEK                 | 378  | 17 | 3  | 14.93  | b15y3y7                                                                                          | 2014.93 | 90.537  | 3199   | 3 | 672.31  | -0.424  |
| P09493 TPM1_HUMAN Tropomyosin<br>alpha-1 chain | 1  |                       | IQLVEEELDR                         | 91   | 10 | 16 | 95.04  | b2*b2b3y1y2y3y4*y4y5*y5y6y<br>7y8y9*y9y10                                                        | 1243.65 | 59.102  | 271670 | 2 | 622.33  | -2.454  |
| P09493 TPM1_HUMAN Tropomyosin<br>alpha-1 chain | 2  |                       | LATALQK                            | 105  | 7  | 10 | 60.22  | b4*b4y3y4y5*y5y6*y6y7*y7                                                                         | 744.45  | 28.648  | 24903  | 2 | 372.73  | -9.264  |
| P09493 TPM1_HUMAN Tropomyosin<br>alpha-1 chain | 3  |                       | SIDDELEDELYAQK                     | 251  | 13 | 5  | 31.98  | b3b10y7y8*y8                                                                                     | 1538.73 | 69.503  | 1886   | 2 | 769.87  | 5.315   |
| P09493 TPM1_HUMAN Tropomyosin<br>alpha-1 chain | 4  |                       | MEIQEIQLKEAK                       | 140  | 12 | 4  | 20.51  | b4b10*b10y6                                                                                      | 1459.80 | 55.670  | 79948  | 2 | 730.41  | 14.216  |
| P09493 TPM1_HUMAN Tropomyosin<br>alpha-1 chain | 5  |                       | ENALDRAEQAEADK                     | 15   | 14 | 9  | 49.11  | b10b11b12*b12*b12y9*y9y10<br>*y10                                                                | 1559.72 | 43.784  | 26890  | 2 | 780.36  | -8.609  |
| P09493 TPM1_HUMAN Tropomyosin<br>alpha-1 chain | 6  |                       | AEERAELSEGK                        | 178  | 11 | 4  | 22.46  | b5*b5b7y4                                                                                        | 1218.59 | 63.425  | 12145  | 2 | 609.80  | -9.116  |
| P09493 TPM1_HUMAN Tropomyosin<br>alpha-1 chain | 7  |                       | LEKSIDDELEDELYAQK                  | 248  | 16 | 4  | 15.7   | b9y7y10*y10                                                                                      | 1908.93 | 109.266 | 4611   | 2 | 954.97  | -4.860  |
| P35749 MYH11_HUMAN Myosin-11                   | 1  |                       | QLLQANPILEAFGNAK                   | 216  | 16 | 31 | 183.05 | b2*b2b3*b3b4*b4b5*b5b6*b6<br>b16y1y2y4*y4y5y6y7*y7*y7y8<br>y9y10y11y12*y12*y13*y13*y1<br>3y14y16 | 1726.94 | 91.394  | 242617 | 2 | 863.97  | -4.383  |
| P35749 MYH11_HUMAN Myosin-11                   | 2  |                       | TQLEEELEDELQATEDAK                 | 1545 | 17 | 9  | 49.38  | b4*b4b12b13y6y8y9y14y17                                                                          | 1961.93 | 79.033  | 161985 | 2 | 981.47  | 3.795   |
| P35749 MYH11_HUMAN Myosin-11                   | 3  |                       | KEEELQAALAR                        | 1087 | 11 | 13 | 121.39 | b4b8b10y2y3y4y5y7y8y9y10y<br>11*y11                                                              | 1257.68 | 42.574  | 93221  | 2 | 629.34  | -1.359  |

|                               |    |                      |                         |      |    |    |       |                            |         |         |       |   |         |         |
|-------------------------------|----|----------------------|-------------------------|------|----|----|-------|----------------------------|---------|---------|-------|---|---------|---------|
| IP35749 MYH11_HUMAN Myosin-11 | 4  | Carbamidomethyl+C(1) | CNGVLEGIR               | 700  | 9  | 10 | 58.17 | b1b2*b2b8*b8y1y3y4y5y7     | 1017.51 | 48.819  | 51840 | 2 | 509.26  | -3.179  |
| IP35749 MYH11_HUMAN Myosin-11 | 5  |                      | EEELQAALAR              | 1088 | 10 | 3  | 31.98 | y3y6y7                     | 1129.58 | 49.492  | 29166 | 2 | 565.30  | -1.513  |
| IP35749 MYH11_HUMAN Myosin-11 | 6  |                      | TEFSIIHYAGK             | 572  | 11 | 4  | 25.47 | b6b7y6y11                  | 1265.64 | 27.856  | 16560 | 2 | 633.33  | -7.137  |
| IP35749 MYH11_HUMAN Myosin-11 | 7  |                      | IVGLDQMAK               | 624  | 9  | 4  | 22.06 | y6°y6*y6y7                 | 974.54  | 26.507  | 10561 | 2 | 487.77  | 3.633   |
| IP35749 MYH11_HUMAN Myosin-11 | 8  |                      | MAQQMLDLEEQLEEEEAAR     | 947  | 19 | 3  | 22.88 | y4y5y14                    | 2263.02 | 68.522  | 6350  | 4 | 566.51  | -1.187  |
| IP35749 MYH11_HUMAN Myosin-11 | 9  |                      | LQQLFNHTMFILEQEEYQR     | 482  | 19 | 8  | 45.12 | b2b3*b3b8y8y9y11y12        | 2467.24 | 103.567 | 3902  | 3 | 823.08  | 12.963  |
| IP35749 MYH11_HUMAN Myosin-11 | 10 |                      | DLQARDEQNEEK            | 1578 | 12 | 6  | 29.65 | b9b11°b11y6y9*y9           | 1474.67 | 49.281  | 2577  | 3 | 492.23  | -4.304  |
| IP35749 MYH11_HUMAN Myosin-11 | 11 |                      | QLHEYETELEDERK          | 1596 | 14 | 5  | 35.88 | b8b10b11y5y9               | 1818.83 | 56.772  | 2330  | 2 | 909.92  | -9.530  |
| IP35749 MYH11_HUMAN Myosin-11 | 12 |                      | GNETSFVPSR              | 1930 | 10 | 5  | 24.99 | b9*b9y3y8y10               | 1093.54 | 44.213  | 2290  | 2 | 547.27  | 11.275  |
| IP35749 MYH11_HUMAN Myosin-11 | 13 |                      | DVASLSSQLQDTQELLQEETR   | 1308 | 21 | 4  | 17.07 | b9b11y10y15                | 2390.14 | 80.504  | 2064  | 2 | 1195.57 | -12.462 |
| IP35749 MYH11_HUMAN Myosin-11 | 14 |                      | SHEAQVQEMR              | 1188 | 10 | 3  | 24.99 | b7y4y6                     | 1214.55 | 31.649  | 1600  | 3 | 405.52  | -4.824  |
| IP35749 MYH11_HUMAN Myosin-11 | 15 |                      | DLGEELEALK              | 1142 | 10 | 4  | 24.99 | b3°b3b7y8                  | 1116.58 | 72.496  | 34130 | 2 | 558.79  | -0.437  |
| IP35749 MYH11_HUMAN Myosin-11 | 16 |                      | EELAEELASSLSGR          | 1710 | 14 | 7  | 41.32 | b4b9°b9b10°b10y9y10        | 1490.76 | 81.254  | 32001 | 2 | 745.88  | 19.325  |
| IP35749 MYH11_HUMAN Myosin-11 | 17 |                      | AELNDK                  | 1275 | 6  | 1  | 12.93 | b5                         | 689.34  | 30.441  | 13623 | 1 | 689.34  | -12.661 |
| IP35749 MYH11_HUMAN Myosin-11 | 18 |                      | VIENADGSEETDTR          | 1946 | 15 | 3  | 24.68 | y4y5y9                     | 1664.71 | 106.405 | 10354 | 2 | 832.86  | -6.526  |
| IP35749 MYH11_HUMAN Myosin-11 | 19 |                      | NTDQASMPDNATAAQK        | 365  | 15 | 3  | 16.6  | b5y5y14                    | 1591.73 | 45.227  | 10039 | 2 | 796.37  | 18.023  |
| IP35749 MYH11_HUMAN Myosin-11 | 20 |                      | LEDEILVMDDQNNK          | 982  | 14 | 4  | 30.63 | b11b12y5y10                | 1675.81 | 77.194  | 8294  | 2 | 838.41  | 18.284  |
| IP35749 MYH11_HUMAN Myosin-11 | 21 | Carbamidomethyl+C(2) | LCTEQGSHPK              | 552  | 10 | 3  | 26.75 | b7y5y6                     | 1156.53 | 37.403  | 7633  | 3 | 386.18  | -9.077  |
| IP35749 MYH11_HUMAN Myosin-11 | 22 |                      | EIENLTQYEEK             | 1399 | 12 | 3  | 27.71 | y4y5y8                     | 1523.70 | 37.587  | 7178  | 2 | 762.35  | -14.741 |
| IP35749 MYH11_HUMAN Myosin-11 | 23 |                      | EELER                   | 1499 | 5  | 2  | 12.45 | b3°b3                      | 675.33  | 41.783  | 5222  | 1 | 675.33  | 0.271   |
| IP35749 MYH11_HUMAN Myosin-11 | 24 |                      | ISDLTTNLAEIEEEK         | 1007 | 14 | 10 | 74.17 | b6°b6y3y5y6y9°y9y10y13*y13 | 1591.75 | 49.831  | 4539  | 2 | 796.38  | -13.957 |
| IP35749 MYH11_HUMAN Myosin-11 | 25 |                      | NLLQEQLQAETELYAEAEEMR   | 889  | 21 | 9  | 42.92 | b3b10°b10b11*b11y3y4y6y12  | 2508.21 | 99.841  | 3922  | 4 | 627.81  | 8.566   |
| IP35749 MYH11_HUMAN Myosin-11 | 26 |                      | LQNEVESVTGMLNEAEGK      | 1284 | 18 | 4  | 19.66 | b3b6y5y11                  | 1947.94 | 102.120 | 3282  | 2 | 974.47  | 4.512   |
| IP35749 MYH11_HUMAN Myosin-11 | 27 |                      | TELEDTLDSTATQQLR        | 1152 | 17 | 6  | 23.99 | b5°b5b8b15y13°y13          | 1949.93 | 84.095  | 3249  | 2 | 975.47  | 0.939   |
| IP35749 MYH11_HUMAN Myosin-11 | 28 |                      | QNLER                   | 1359 | 5  | 3  | 24.91 | b3*b3b4                    | 659.36  | 104.786 | 3070  | 2 | 330.18  | 14.811  |
| IP35749 MYH11_HUMAN Myosin-11 | 29 |                      | GQQLQAER                | 937  | 8  | 4  | 34.03 | b3b6*b6y4                  | 929.47  | 57.944  | 2895  | 2 | 465.24  | -14.118 |
| IP35749 MYH11_HUMAN Myosin-11 | 30 |                      | IVDMYK                  | 137  | 6  | 1  | 12.93 | b5                         | 768.40  | 45.748  | 2639  | 2 | 384.70  | 7.228   |
| IP35749 MYH11_HUMAN Myosin-11 | 31 |                      | AAAYDK                  | 1411 | 6  | 2  | 12.93 | y3°y3                      | 638.31  | 36.514  | 2457  | 1 | 638.31  | -10.996 |
| IP35749 MYH11_HUMAN Myosin-11 | 32 |                      | LEGDASDFHEQIADLQAQIAELK | 1059 | 23 | 5  | 27.1  | b4b9b10b12°b12             | 2541.30 | 122.806 | 2436  | 3 | 847.77  | 19.022  |



|                               |    |                       |                              |      |    |    |       |                            |         |         |        |   |         |         |
|-------------------------------|----|-----------------------|------------------------------|------|----|----|-------|----------------------------|---------|---------|--------|---|---------|---------|
| IP35749 MYH11_HUMAN Myosin-11 | 33 | Carbamidomethyl+C(12) | ITDVIMAFQAMCR                | 785  | 13 | 4  | 18.95 | b3b7°b7y9                  | 1555.77 | 68.780  | 2183   | 2 | 778.39  | 18.518  |
| IP35749 MYH11_HUMAN Myosin-11 | 34 |                       | TFHIFYMYIAGAK                | 279  | 13 | 3  | 18.95 | b12y3y8                    | 1561.77 | 78.261  | 2093   | 2 | 781.39  | -14.147 |
| IP35749 MYH11_HUMAN Myosin-11 | 35 |                       | HAQAVEELTEQLEQFK             | 1200 | 16 | 4  | 32.84 | b4b7b8b12                  | 1899.97 | 107.386 | 1774   | 2 | 950.49  | 11.886  |
| IP35749 MYH11_HUMAN Myosin-11 | 36 |                       | HSQLTEEK                     | 881  | 8  | 5  | 34.03 | b6°b6y3°y3y5               | 971.49  | 32.093  | 1681   | 2 | 486.25  | 14.073  |
| IP35749 MYH11_HUMAN Myosin-11 | 37 | Carbamidomethyl+C(2)  | VCHLMGINVTDVTR               | 380  | 14 | 5  | 39.26 | b4b6b7b11y4                | 1662.81 | 58.545  | 1658   | 2 | 831.91  | 0.073   |
| IP35749 MYH11_HUMAN Myosin-11 | 38 |                       | ELEGHISDLQEDLDSER            | 1114 | 17 | 7  | 49.38 | b5b6b11b15y3y13y14         | 1984.94 | 99.881  | 1590   | 2 | 992.97  | 15.498  |
| IP35749 MYH11_HUMAN Myosin-11 | 39 |                       | IAQLEEELEEEQGNMEAMSDR        | 1737 | 21 | 6  | 19.84 | b3°b3b7b9°b9y10            | 2451.10 | 102.383 | 1537   | 4 | 613.53  | 13.148  |
| IP35749 MYH11_HUMAN Myosin-11 | 40 |                       | TEFSIIHYAGKVDYNASAWLTK       | 572  | 22 | 7  | 35.87 | b5°b5b8b9b14b19°b19        | 2514.25 | 99.864  | 576104 | 3 | 838.75  | -7.865  |
| IP35749 MYH11_HUMAN Myosin-11 | 41 |                       | NLLQEQLQAETELYAEAEEMRVR      | 889  | 23 | 6  | 15.79 | b3b12°b12y8y10°y10         | 2763.35 | 73.051  | 119360 | 3 | 921.79  | -4.683  |
| IP35749 MYH11_HUMAN Myosin-11 | 42 |                       | ALDEETRSHEAQVQEMR            | 1181 | 17 | 6  | 31.56 | y3y5°y5y8*y8y9             | 2028.96 | 83.222  | 112857 | 3 | 676.99  | 11.311  |
| IP35749 MYH11_HUMAN Myosin-11 | 43 |                       | DADFNGTKASE                  | 1961 | 11 | 8  | 62.83 | b5b10y3y6°y6y7°y7y9        | 1154.51 | 42.661  | 50769  | 2 | 577.76  | 14.274  |
| IP35749 MYH11_HUMAN Myosin-11 | 44 |                       | RHEMPPHIYAIADTAYR            | 146  | 17 | 10 | 51.06 | b3°b3b4b9b11°b11b13y3y5°y5 | 2041.02 | 72.454  | 32238  | 2 | 1021.01 | 3.888   |
| IP35749 MYH11_HUMAN Myosin-11 | 45 |                       | SLEADMLQLQEDLAAERAR          | 1683 | 20 | 7  | 38.96 | b7b11b13b15b16y11*y11      | 2230.11 | 85.998  | 16554  | 3 | 744.04  | -2.190  |
| IP35749 MYH11_HUMAN Myosin-11 | 46 |                       | NALQDEKR                     | 1724 | 8  | 3  | 31.02 | b7y3y4                     | 973.50  | 70.640  | 16149  | 2 | 487.25  | -7.837  |
| IP35749 MYH11_HUMAN Myosin-11 | 47 |                       | LMTTLRNTTPNFVR               | 663  | 14 | 5  | 17.67 | b4°b4b12y9*y9              | 1663.91 | 116.284 | 13912  | 2 | 832.46  | 9.537   |
| IP35749 MYH11_HUMAN Myosin-11 | 48 | Carbamidomethyl+C(14) | YFSGLIYTYSGLFVVVNPYKHLPIYSEK | 108  | 29 | 4  | 22.24 | b10b11°b11b14              | 3457.70 | 132.224 | 9360   | 4 | 865.18  | -14.616 |
| IP35749 MYH11_HUMAN Myosin-11 | 49 | Carbamidomethyl+C(12) | FSKVEDMAELTCLNEASVLHNLR      | 83   | 23 | 4  | 22.2  | b8b10b11°b11               | 2676.27 | 124.065 | 6751   | 3 | 892.76  | -13.866 |
| IP35749 MYH11_HUMAN Myosin-11 | 50 |                       | DFQRELEDAR                   | 1655 | 10 | 4  | 24.99 | b3y4y7°y7                  | 1278.60 | 57.999  | 5051   | 3 | 426.87  | -6.683  |
| IP35749 MYH11_HUMAN Myosin-11 | 51 |                       | NISSKYADER                   | 1461 | 10 | 9  | 54.67 | b3b7b8°b8°b8b9°b9°b9y7     | 1182.57 | 40.574  | 4797   | 2 | 591.79  | -5.574  |
| IP35749 MYH11_HUMAN Myosin-11 | 52 |                       | GQFERDLQAR                   | 1573 | 10 | 4  | 31.98 | b3°b3b4b6                  | 1219.60 | 31.601  | 4410   | 2 | 610.31  | -11.010 |
| IP35749 MYH11_HUMAN Myosin-11 | 53 |                       | QGFEAASIKEEK                 | 42   | 12 | 4  | 20.51 | b4b6°b6y11                 | 1336.69 | 76.314  | 3793   | 3 | 446.23  | 9.224   |
| IP35749 MYH11_HUMAN Myosin-11 | 54 |                       | SHEAQVQEMRQK                 | 1188 | 12 | 4  | 27.71 | b4b6b7°b7                  | 1470.71 | 55.190  | 3497   | 2 | 735.86  | -3.237  |
| IP35749 MYH11_HUMAN Myosin-11 | 55 |                       | EEKGDEVVVELVENGK             | 51   | 16 | 3  | 24.07 | b3b4b13                    | 1772.88 | 63.499  | 3389   | 2 | 886.94  | -8.813  |
| IP35749 MYH11_HUMAN Myosin-11 | 56 |                       | MAQQMLDLEEQLEEEEAARQK        | 947  | 21 | 4  | 12.79 | b12y7*y7y11                | 2519.16 | 107.273 | 2669   | 3 | 840.39  | -6.978  |
| IP35749 MYH11_HUMAN Myosin-11 | 57 |                       | QELEEILHEMEARLEEEEDR         | 917  | 20 | 5  | 20.69 | b4°b4b9b11y3               | 2527.18 | 82.684  | 2356   | 3 | 843.06  | 6.183   |
| IP35749 MYH11_HUMAN Myosin-11 | 58 |                       | KLEDEILVMDDQNNK              | 981  | 15 | 5  | 27.13 | b3y5y9y10*y10              | 1803.88 | 59.520  | 2250   | 2 | 902.44  | 1.489   |
| IP35749 MYH11_HUMAN Myosin-11 | 59 |                       | GNETSFVPSRR                  | 1930 | 11 | 8  | 49.58 | b4°b4b7b8°b8b9y3°y3        | 1249.62 | 49.789  | 2084   | 2 | 625.31  | -9.964  |
| IP35749 MYH11_HUMAN Myosin-11 | 60 | Carbamidomethyl+C(7)  | SFVEKLCTEQGSHPK              | 547  | 15 | 6  | 48.52 | b4b8y3y5y8y12              | 1746.84 | 97.033  | 1998   | 3 | 582.95  | -6.429  |
| IP35749 MYH11_HUMAN Myosin-11 | 61 |                       | ELEGHISDLQEDLDSERAAR         | 1114 | 20 | 5  | 30.07 | b5b7°b7b10b15              | 2283.10 | 76.188  | 1945   | 3 | 761.70  | 5.454   |

|                                          |    |                                            |                                |      |    |    |        |                                                               |         |         |        |   |         |         |
|------------------------------------------|----|--------------------------------------------|--------------------------------|------|----|----|--------|---------------------------------------------------------------|---------|---------|--------|---|---------|---------|
| P35749 MYH11_HUMAN Myosin-11             | 62 |                                            | RALETQMEEMK                    | 1534 | 11 | 7  | 49.13  | b7b8b9y3°y3y8°y8                                              | 1365.65 | 43.274  | 1849   | 2 | 683.33  | -1.609  |
| P35749 MYH11_HUMAN Myosin-11             | 63 |                                            | QTLEKENADLAGELR                | 1226 | 15 | 5  | 39.17  | b3b6*b6b10b13                                                 | 1686.85 | 95.455  | 1707   | 3 | 562.95  | -9.914  |
| P35749 MYH11_HUMAN Myosin-11             | 64 |                                            | AEMEDLVSSKDDVVGK               | 1510 | 15 | 3  | 24.68  | y3y5y12                                                       | 1622.77 | 45.681  | 1647   | 3 | 541.59  | 7.447   |
| P35749 MYH11_HUMAN Myosin-11             | 65 | Phosphoryl STY(2)                          | VTVGKDDIQK                     | 68   | 10 | 3  | 26.75  | b5y7y8                                                        | 1182.56 | 30.235  | 11108  | 2 | 591.78  | -9.497  |
| P35749 MYH11_HUMAN Myosin-11             | 66 | Phosphoryl STY(7)                          | LQDFASTVEALEEGKK               | 1379 | 16 | 7  | 28.56  | b4°b4b6y10°y11_H3PO4<br>y10y11°y11                            | 1844.88 | 65.865  | 6539   | 3 | 615.63  | 9.594   |
| P35749 MYH11_HUMAN Myosin-11             | 67 | Phosphoryl STY(9)                          | ASRDEIFATAK                    | 1665 | 11 | 8  | 59.82  | b4b6b7°b7b8y4y9°y9                                            | 1288.60 | 34.979  | 6036   | 2 | 644.80  | 9.947   |
| P35749 MYH11_HUMAN Myosin-11             | 68 | Carbamidomethyl+C(14)<br>;Phosphoryl STY() | YFSGLIYTYGLFCVVVNPYK           | 108  | 21 | 3  | 12.79  | b6b8y11                                                       | 2570.23 | 61.366  | 4980   | 3 | 857.42  | 14.058  |
| P35749 MYH11_HUMAN Myosin-11             | 69 | Phosphoryl STY(7)                          | TFHFIFYMIAGAK                  | 279  | 13 | 6  | 29.85  | b6b9°b10_HPO3 b9b10°b10y7                                     | 1641.74 | 42.631  | 3890   | 2 | 821.37  | -4.982  |
| P35749 MYH11_HUMAN Myosin-11             | 70 | Oxidation+M(8)                             | TFHFIFYMIAGAKEK                | 279  | 15 | 5  | 22.62  | b3°b3b4°b4y6                                                  | 1834.90 | 58.060  | 28410  | 3 | 612.31  | -8.316  |
| P35749 MYH11_HUMAN Myosin-11             | 71 | Oxidation+M(15)                            | LQRELDEATESNEAMGREVNALK        | 1902 | 23 | 5  | 12.12  | b10°b10y10y13°y13                                             | 2619.29 | 82.718  | 7929   | 4 | 655.58  | 8.389   |
| P35749 MYH11_HUMAN Myosin-11             | 72 | Oxidation+M(6)                             | ALETQMEEMK                     | 1535 | 10 | 3  | 26.75  | b7b8y4                                                        | 1225.54 | 33.218  | 6322   | 2 | 613.27  | -7.172  |
| P35749 MYH11_HUMAN Myosin-11             | 73 | Oxidation+M(11)                            | NSLQDQLDEEMKAK                 | 1345 | 14 | 4  | 17.67  | b7°b7y3y10                                                    | 1665.71 | 43.267  | 4765   | 2 | 833.36  | -10.333 |
| P35749 MYH11_HUMAN Myosin-11             | 74 | Oxidation+M(12)                            | ELDEATESNEAMGREVNALK           | 1905 | 20 | 4  | 13.21  | b3y13°y13y15                                                  | 2222.03 | 65.836  | 2992   | 3 | 741.35  | 1.978   |
| Q13885 TBB2A_HUMAN Tubulin beta-2A chain | 1  |                                            | SGPFGQIFRPDNFVFGQSGAGNN<br>WAK | 77   | 26 | 13 | 60.34  | b5b7b14b15y1y2y3y4y6y8y9y<br>12y26                            | 2798.36 | 89.820  | 170532 | 3 | 933.46  | 4.188   |
| Q13885 TBB2A_HUMAN Tubulin beta-2A chain | 2  |                                            | LAVNMVFPFR                     | 252  | 10 | 8  | 77.12  | b2y4y5y6y7y8y9y10                                             | 1143.63 | 72.778  | 168761 | 2 | 572.32  | -4.483  |
| Q13885 TBB2A_HUMAN Tubulin beta-2A chain | 3  | Carbamidomethyl+C(23)                      | LTTPTYGDLNHLVSATMSGVTTC<br>LR  | 216  | 25 | 20 | 167.71 | y1y2y3y4°y4y5y6y7y8y9y10y1<br>1y12°y12y13y14y22y23y25*y<br>25 | 2708.33 | 95.559  | 75112  | 3 | 903.45  | -1.262  |
| Q13885 TBB2A_HUMAN Tubulin beta-2A chain | 4  |                                            | LHFFMPGFAPLTSR                 | 262  | 14 | 6  | 35.88  | b5b8b9y3y12y14                                                | 1620.82 | 89.694  | 38804  | 3 | 540.94  | -10.393 |
| Q13885 TBB2A_HUMAN Tubulin beta-2A chain | 5  |                                            | IREEYPDR                       | 154  | 8  | 7  | 51.25  | b2b4b7y1y3y6y8                                                | 1077.54 | 25.047  | 19158  | 2 | 539.27  | 3.285   |
| Q13885 TBB2A_HUMAN Tubulin beta-2A chain | 6  |                                            | IMNTFSVMPSPK                   | 162  | 12 | 5  | 47.85  | b6b9b11y7y8                                                   | 1351.67 | 59.515  | 77328  | 3 | 451.23  | -2.077  |
| Q13885 TBB2A_HUMAN Tubulin beta-2A chain | 7  |                                            | MSATFIGNSTAIQELFK              | 362  | 17 | 8  | 53.54  | b5b6°b6b7b8y3y5*y5                                            | 1857.93 | 116.281 | 13647  | 3 | 619.98  | -5.585  |
| Q13885 TBB2A_HUMAN Tubulin beta-2A chain | 8  |                                            | INVYYNEAAGNK                   | 46   | 12 | 7  | 43.87  | b6b9°b9b11y8°y8y10                                            | 1355.63 | 54.287  | 5344   | 2 | 678.32  | -22.151 |
| Q13885 TBB2A_HUMAN Tubulin beta-2A chain | 9  | Phosphoryl STY()                           | ALTVPELTQMFDSK                 | 282  | 15 | 3  | 24.68  | y6y7y12                                                       | 1787.84 | 43.743  | 1605   | 3 | 596.62  | 12.154  |
| Q13885 TBB2A_HUMAN Tubulin beta-2A chain | 10 | Carbamidomethyl+C(12)<br>;Oxidation+M(1)   | MREIVHIQAGQCGNQIGAK            | 0    | 19 | 8  | 43.36  | b3b5°b5b6b18y9*y9y10                                          | 2126.09 | 65.864  | 5215   | 2 | 1063.55 | 12.746  |
| Q9BVA1 TBB2B_HUMAN Tubulin beta-2B chain | 1  |                                            | SGPFGQIFRPDNFVFGQSGAGNN<br>WAK | 77   | 26 | 13 | 60.34  | b5b7b14b15y1y2y3y4y6y8y9y<br>12y26                            | 2798.36 | 89.820  | 170532 | 3 | 933.46  | 4.188   |
| Q9BVA1 TBB2B_HUMAN Tubulin beta-2B chain | 2  |                                            | LAVNMVFPFR                     | 252  | 10 | 8  | 77.12  | b2y4y5y6y7y8y9y10                                             | 1143.63 | 72.778  | 168761 | 2 | 572.32  | -4.483  |
| Q9BVA1 TBB2B_HUMAN Tubulin beta-2B chain | 3  | Carbamidomethyl+C(23)                      | LTTPTYGDLNHLVSATMSGVTTC<br>LR  | 216  | 25 | 20 | 167.71 | y1y2y3y4°y4y5y6y7y8y9y10y1<br>1y12°y12y13y14y22y23y25*y<br>25 | 2708.33 | 95.559  | 75112  | 3 | 903.45  | -1.262  |
| Q9BVA1 TBB2B_HUMAN Tubulin beta-2B chain | 4  |                                            | LHFFMPGFAPLTSR                 | 262  | 14 | 6  | 35.88  | b5b8b9y3y12y14                                                | 1620.82 | 89.694  | 38804  | 3 | 540.94  | -10.393 |

|                                                                 |    |                                         |                               |     |    |    |        |                                                    |         |         |       |   |         |         |
|-----------------------------------------------------------------|----|-----------------------------------------|-------------------------------|-----|----|----|--------|----------------------------------------------------|---------|---------|-------|---|---------|---------|
| Q9BVA1 TBB2B_HUMAN Tubulin beta-2B chain                        | 5  |                                         | IREEYPDR                      | 154 | 8  | 7  | 51.25  | b2b4b7y1y3y6y8                                     | 1077.54 | 25.047  | 19158 | 2 | 539.27  | 3.285   |
| Q01518 CAP1_HUMAN Adenylyl cyclase-associated protein 1         | 1  |                                         | AGAAPYVQAFDSSLGAPVAEYLK       | 37  | 23 | 21 | 128.09 | b2b3b4b6b7b8b9*b9b13°b13b15°b15y1y2y3y4°y4y5y7y8y9 | 2351.21 | 115.361 | 68126 | 3 | 784.41  | -6.749  |
| Q01518 CAP1_HUMAN Adenylyl cyclase-associated protein 1         | 2  | Carbamidomethyl+C(5)                    | NSLDCEIVSAK                   | 422 | 11 | 6  | 29.45  | b1b2y3y8y9y11                                      | 1235.59 | 46.666  | 59342 | 2 | 618.30  | -1.087  |
| Q01518 CAP1_HUMAN Adenylyl cyclase-associated protein 1         | 3  |                                         | LSDLLAPISEQIK                 | 100 | 13 | 4  | 31.98  | b3b4y5y7                                           | 1426.81 | 77.668  | 53938 | 2 | 713.91  | -0.599  |
| Q01518 CAP1_HUMAN Adenylyl cyclase-associated protein 1         | 4  | Carbamidomethyl+C(9)                    | ALLVTASQCQPAENK               | 84  | 16 | 11 | 78.57  | b3b11b14y3y5y6y8y11°y11y12y16                      | 1757.88 | 43.608  | 41553 | 2 | 879.45  | -0.625  |
| Q01518 CAP1_HUMAN Adenylyl cyclase-associated protein 1         | 5  |                                         | VENQENVSNLVIEDTELK            | 330 | 18 | 8  | 37.3   | b3b4y1y2y6y7y11y18                                 | 2073.04 | 70.207  | 30737 | 2 | 1037.03 | 4.240   |
| Q01518 CAP1_HUMAN Adenylyl cyclase-associated protein 1         | 6  |                                         | EMNDAAMFYTNR                  | 155 | 12 | 7  | 60.86  | y2y4y5y6y7y8y12                                    | 1462.62 | 57.469  | 24184 | 2 | 731.81  | 5.425   |
| Q01518 CAP1_HUMAN Adenylyl cyclase-associated protein 1         | 7  |                                         | LEAVSHTSDMHR                  | 17  | 12 | 8  | 74.97  | b2b4b5y3y4y6y7y8                                   | 1382.64 | 25.071  | 16016 | 3 | 461.55  | -5.209  |
| Q01518 CAP1_HUMAN Adenylyl cyclase-associated protein 1         | 8  |                                         | SSEMNVLIPTEGGDFNEFPVEQFK      | 433 | 25 | 4  | 11.62  | b12y5y17y25                                        | 2811.34 | 91.892  | 15802 | 2 | 1406.17 | 6.253   |
| Q01518 CAP1_HUMAN Adenylyl cyclase-associated protein 1         | 9  |                                         | SGPKPFSAPKQTSPPSK             | 294 | 18 | 13 | 43.22  | b1b2b6b8y1y2y4°y4y6y7*y7y8y18                      | 1837.97 | 34.244  | 14027 | 3 | 613.33  | -6.907  |
| Q01518 CAP1_HUMAN Adenylyl cyclase-associated protein 1         | 10 |                                         | LFNHLSAVSESIQALGWVAMAPKPGPYVK | 126 | 29 | 5  | 15.66  | b3*b3b10b13y6                                      | 3110.62 | 97.864  | 52488 | 4 | 778.41  | -9.340  |
| Q01518 CAP1_HUMAN Adenylyl cyclase-associated protein 1         | 11 |                                         | AVGR                          | 13  | 4  | 1  | 11.97  | b3                                                 | 402.25  | 92.550  | 14922 | 1 | 402.25  | 1.138   |
| Q01518 CAP1_HUMAN Adenylyl cyclase-associated protein 1         | 12 |                                         | EVITFR                        | 113 | 6  | 1  | 12.93  | b3                                                 | 764.42  | 51.739  | 11715 | 1 | 764.42  | -13.254 |
| Q01518 CAP1_HUMAN Adenylyl cyclase-associated protein 1         | 13 |                                         | GYADSPSK                      | 29  | 8  | 4  | 38.8   | y4y6y7°y7                                          | 824.37  | 58.062  | 2982  | 1 | 824.37  | -7.404  |
| Q01518 CAP1_HUMAN Adenylyl cyclase-associated protein 1         | 14 | Carbamidomethyl+C(9)                    | ALLVTASQCQPAENKLSDLLAPISEQIK  | 84  | 29 | 9  | 44.72  | b3b4b14b22y4y7y8y12y25                             | 3165.69 | 89.650  | 83949 | 3 | 1055.90 | 3.933   |
| Q01518 CAP1_HUMAN Adenylyl cyclase-associated protein 1         | 15 | Carbamidomethyl+C(12)                   | VPTISINKTDGCHAYLSK            | 404 | 18 | 4  | 32.83  | y8y10y12y14                                        | 2004.00 | 48.925  | 21812 | 4 | 501.75  | -12.183 |
| Q01518 CAP1_HUMAN Adenylyl cyclase-associated protein 1         | 16 |                                         | LEAVSHTSDMHRGYADSPSK          | 17  | 20 | 4  | 23.32  | b9b11b12y12                                        | 2188.03 | 63.428  | 11166 | 3 | 730.01  | 8.815   |
| Q01518 CAP1_HUMAN Adenylyl cyclase-associated protein 1         | 17 |                                         | EFHTTGLAWSKTGPVAK             | 198 | 17 | 4  | 37     | b7b10b11b12                                        | 1829.95 | 68.832  | 2837  | 3 | 610.65  | -3.135  |
| Q01518 CAP1_HUMAN Adenylyl cyclase-associated protein 1         | 18 | Carbamidomethyl+C(9)                    | INSITVDNCKK                   | 366 | 11 | 7  | 47.37  | b5b9°b9b10y6y7*y7                                  | 1291.68 | 34.972  | 1611  | 2 | 646.34  | 8.033   |
| Q01518 CAP1_HUMAN Adenylyl cyclase-associated protein 1         | 19 | Carbamidomethyl+C(9); Phosphoryl.STY(5) | ALLVTASQCQPAENK               | 84  | 16 | 6  | 26.11  | b14°b14*b14y11_HPO3y10y11y13_HPO3y13               | 1837.82 | 76.292  | 21767 | 2 | 919.42  | -9.299  |
| Q01518 CAP1_HUMAN Adenylyl cyclase-associated protein 1         | 20 | Carbamidomethyl+C(9); Phosphoryl.STY(3) | INSITVDNCK                    | 366 | 10 | 4  | 49.2   | y4_HPO3y4y6_HPO3y6y7y8_HPO3y8                      | 1243.52 | 49.794  | 11047 | 1 | 1243.52 | -10.209 |
| Q01518 CAP1_HUMAN Adenylyl cyclase-associated protein 1         | 21 |                                         | SDLLAPISEQIK                  | 101 | 12 | 1  | 7.26   | b5                                                 | 1313.72 | 77.629  | 3577  | 2 | 657.36  | -9.849  |
| Q01518 CAP1_HUMAN Adenylyl cyclase-associated protein 1         | 22 |                                         | SGPKPFSAPKQTSPPSK             | 294 | 18 | 0  | 6.24   |                                                    | 1819.95 | 34.214  | 2668  | 4 | 455.74  | -7.915  |
| Q9Y536 PAL4B_HUMAN Peptidylprolyl cis-trans isomerase A-like 4B | 1  | Carbamidomethyl+C(7)                    | IIPGFMCGGDFTR                 | 55  | 14 | 10 | 100.94 | b2y3y6y7y8y9y10y11y12y14                           | 1598.75 | 71.096  | 84876 | 2 | 799.88  | 3.207   |
| Q9Y536 PAL4B_HUMAN Peptidylprolyl cis-trans isomerase A-like 4B | 2  |                                         | TEWLDGK                       | 118 | 7  | 4  | 38.32  | b4y4y6y7                                           | 848.42  | 55.679  | 5275  | 1 | 848.42  | 8.993   |
| Q9Y536 PAL4B_HUMAN Peptidylprolyl cis-trans isomerase A-like 4B | 3  |                                         | VNIVEAMEHFGYR                 | 135 | 13 | 9  | 63.23  | b6b8*b8b9y4y6y7°y7y8                               | 1564.76 | 34.936  | 7036  | 3 | 522.26  | 0.936   |

|                                                                 |    |                                                                         |                                        |     |    |    |        |                                                                      |         |         |        |   |         |         |
|-----------------------------------------------------------------|----|-------------------------------------------------------------------------|----------------------------------------|-----|----|----|--------|----------------------------------------------------------------------|---------|---------|--------|---|---------|---------|
| Q9Y536 PAL4B_HUMAN Peptidylprolyl cis-trans isomerase A-like 4B | 4  | Carbamidomethyl+C(24)                                                   | HTGSGILSMANAGPNTNGSQFFIC<br>AAKTEWLDGK | 91  | 34 | 6  | 25.52  | b5b13b15y5y7y8                                                       | 3580.66 | 94.462  | 3108   | 3 | 1194.22 | -11.114 |
| P02768 ALBU_HUMAN Serum albumin                                 | 1  | Carbamidomethyl+C(3)                                                    | YICENQDSISSK                           | 286 | 12 | 23 | 137.33 | b1b2b3b5b8b9*b9b11b12y2°y<br>2y3°y3y4y6y9°y9*y9y10°y10*<br>y10y11y12 | 1443.65 | 33.462  | 882768 | 2 | 722.33  | 3.721   |
| P02768 ALBU_HUMAN Serum albumin                                 | 2  |                                                                         | YLYEIAR                                | 161 | 7  | 13 | 75.68  | b1b2b3b4b7y1y2y3y4°y4y5y6<br>y7                                      | 927.48  | 51.775  | 772220 | 2 | 464.24  | -14.543 |
| P02768 ALBU_HUMAN Serum albumin                                 | 3  | Carbamidomethyl+C(1);<br>Carbamidomethyl+C(2)                           | CCTESLVNR                              | 499 | 9  | 9  | 64.19  | b2y2y3y4y5y6y7°y7y9                                                  | 1138.50 | 32.249  | 98816  | 2 | 569.75  | 0.000   |
| P02768 ALBU_HUMAN Serum albumin                                 | 4  | Carbamidomethyl+C(14)                                                   | ALVLIIFAQYLQCPFDHVK                    | 44  | 21 | 16 | 127.78 | b2b3b4b5b6b7y2y3y4y7y10y1<br>2y13y15y19y21                           | 2490.28 | 108.256 | 73211  | 3 | 830.76  | -3.824  |
| P02768 ALBU_HUMAN Serum albumin                                 | 5  |                                                                         | VPQVSTPTLVEVSR                         | 438 | 14 | 8  | 49.8   | b3b6y2y3y9y10y11y14                                                  | 1511.84 | 60.119  | 50970  | 2 | 756.43  | -0.081  |
| P02768 ALBU_HUMAN Serum albumin                                 | 6  | Carbamidomethyl+C(6);<br>Carbamidomethyl+C(7)                           | AAFTECCQAADK                           | 186 | 12 | 15 | 55.07  | b1b2b3b6°b6b8b12°b12y1y2y<br>6°y6y7y9y12                             | 1371.57 | 31.578  | 32462  | 2 | 686.29  | 2.314   |
| P02768 ALBU_HUMAN Serum albumin                                 | 7  |                                                                         | AEFAEVSK                               | 249 | 8  | 4  | 31.02  | b2b3b4y6                                                             | 880.44  | 33.040  | 28006  | 2 | 440.72  | -1.109  |
| P02768 ALBU_HUMAN Serum albumin                                 | 8  | Carbamidomethyl+C(3)                                                    | RPCFSALEVDETYVVK                       | 508 | 16 | 4  | 33.1   | b8b9b10y2                                                            | 1910.92 | 65.385  | 18578  | 3 | 637.65  | -3.769  |
| P02768 ALBU_HUMAN Serum albumin                                 | 9  | Carbamidomethyl+C(2);<br>Carbamidomethyl+C(11)                          | TCVADESAENCDK                          | 75  | 13 | 3  | 18.95  | b11y8y11                                                             | 1498.58 | 22.043  | 13224  | 2 | 749.80  | 3.747   |
| P02768 ALBU_HUMAN Serum albumin                                 | 10 | Carbamidomethyl+C(3)                                                    | SHCIAEVENDEMPADLPSLAADFV<br>ESK        | 310 | 27 | 4  | 47.59  | y6y7y8y9                                                             | 2974.37 | 111.365 | 1737   | 3 | 992.13  | 9.686   |
| P02768 ALBU_HUMAN Serum albumin                                 | 11 |                                                                         | LVTDLTK                                | 257 | 7  | 6  | 63.23  | b4b5y4y5y6°y6                                                        | 789.45  | 38.544  | 554267 | 2 | 395.23  | -21.956 |
| P02768 ALBU_HUMAN Serum albumin                                 | 12 | Carbamidomethyl+C(10)                                                   | LVRPEVDVMCTAFHDNEETFLK                 | 138 | 22 | 10 | 53.96  | b11°b11b12y6y7°y7y8°y8y10y<br>14                                     | 2650.21 | 88.541  | 74378  | 3 | 884.07  | -20.911 |
| P02768 ALBU_HUMAN Serum albumin                                 | 13 | Carbamidomethyl+C(3)                                                    | QNCSELFQGEYK                           | 413 | 13 | 4  | 28.19  | y4y7*y7y11                                                           | 1657.77 | 71.094  | 31502  | 2 | 829.39  | 7.437   |
| P02768 ALBU_HUMAN Serum albumin                                 | 14 |                                                                         | SLHTLFGDK                              | 88  | 9  | 3  | 28.49  | b4b5y3                                                               | 1017.51 | 60.090  | 6635   | 1 | 1017.51 | -22.014 |
| P02768 ALBU_HUMAN Serum albumin                                 | 15 |                                                                         | SEVAHR                                 | 28  | 6  | 2  | 28.4   | y3y5                                                                 | 698.35  | 30.438  | 5411   | 2 | 349.68  | -11.537 |
| P02768 ALBU_HUMAN Serum albumin                                 | 16 |                                                                         | HPYFYAPPELLFFAK                        | 169 | 14 | 5  | 28.36  | b8°b8b9b11y11                                                        | 1742.87 | 62.851  | 4224   | 2 | 871.94  | -14.568 |
| P02768 ALBU_HUMAN Serum albumin                                 | 17 |                                                                         | DVFLGMFLYEYAR                          | 347 | 13 | 3  | 26.43  | y4y5y10                                                              | 1623.77 | 54.271  | 3944   | 2 | 812.39  | -9.172  |
| P02768 ALBU_HUMAN Serum albumin                                 | 18 | Carbamidomethyl+C(14)                                                   | EFNAETFTFHADICTLSEK                    | 524 | 19 | 8  | 40.74  | b6y4°y4y7y8y10y14°y14                                                | 2260.07 | 89.604  | 2171   | 2 | 1130.54 | 19.985  |
| P02768 ALBU_HUMAN Serum albumin                                 | 19 |                                                                         | KVPQVSTPTLVEVSR                        | 437 | 15 | 22 | 173.82 | b4b5b7°b7b9°b9b10°b10y3y4°<br>y4y5°y5y6y7y8y9y10°y10y11°<br>y11y13   | 1639.92 | 55.281  | 713025 | 3 | 547.31  | -10.272 |
| P02768 ALBU_HUMAN Serum albumin                                 | 20 | Carbamidomethyl+C(14)                                                   | EFNAETFTFHADICTLSEKER                  | 524 | 21 | 6  | 22.85  | b13°b13y4y5y10°y10                                                   | 2545.19 | 103.591 | 17389  | 3 | 849.07  | 11.031  |
| P02768 ALBU_HUMAN Serum albumin                                 | 21 | Carbamidomethyl+C(6);<br>Carbamidomethyl+C(7);<br>Carbamidomethyl+C(15) | AAFTECCQAADKAACLLPK                    | 186 | 19 | 4  | 13.7   | b5°b5y7y13                                                           | 2124.98 | 63.378  | 7901   | 3 | 709.00  | -4.251  |
| P02768 ALBU_HUMAN Serum albumin                                 | 22 |                                                                         | NYAEAKDVFLGMFLYEYAR                    | 341 | 19 | 4  | 13.7   | b8°b8y3y10                                                           | 2300.08 | 68.106  | 7515   | 3 | 767.37  | -9.128  |
| P02768 ALBU_HUMAN Serum albumin                                 | 23 | Carbamidomethyl+C(3)                                                    | DVCKNYAEAK                             | 337 | 10 | 3  | 34.99  | y4y5y6                                                               | 1197.56 | 84.450  | 4361   | 2 | 599.28  | 4.383   |
| P02768 ALBU_HUMAN Serum albumin                                 | 24 | Carbamidomethyl+C(3)                                                    | NECFLQHKDDNPNLPR                       | 122 | 16 | 4  | 15.7   | b15y7y10°y10                                                         | 1996.94 | 99.854  | 4133   | 3 | 666.32  | 2.812   |

|                                                         |    |                       |                                               |     |    |    |       |                                  |         |         |       |   |         |         |
|---------------------------------------------------------|----|-----------------------|-----------------------------------------------|-----|----|----|-------|----------------------------------|---------|---------|-------|---|---------|---------|
| P02768 ALBU_HUMAN Serum albumin                         | 25 | Carbamidomethyl+C(3)  | ETCFAEEGKK                                    | 588 | 10 | 3  | 24.99 | b3y4y8                           | 1198.53 | 32.070  | 2602  | 2 | 599.77  | -10.185 |
| P02768 ALBU_HUMAN Serum albumin                         | 26 | Oxidation+M(6)        | DVFLGMFLYEYAR                                 | 347 | 13 | 4  | 28.19 | y4°y4y7y10                       | 1639.76 | 77.289  | 3051  | 2 | 820.39  | -10.794 |
| P02768 ALBU_HUMAN Serum albumin                         | 27 | Oxidation+M(12)       | NYAEAKDVFLGMFLYEYAR                           | 341 | 19 | 7  | 26.64 | b8b12*b12y4°y4y9y12              | 2316.07 | 82.701  | 2013  | 2 | 1158.54 | -13.176 |
| P02768 ALBU_HUMAN Serum albumin                         | 28 |                       | AEFAEVSK                                      | 249 | 8  | 0  | 1.44  |                                  | 862.43  | 33.082  | 3089  | 1 | 862.43  | 7.077   |
| P50552 VASP_HUMAN Vasodilator-stimulated phosphoprotein | 1  |                       | VQIYHNPTANSFR                                 | 35  | 13 | 9  | 74.2  | b11y3y5y6y7*y7y8y9y13            | 1546.77 | 45.436  | 48233 | 3 | 516.26  | -6.156  |
| P50552 VASP_HUMAN Vasodilator-stimulated phosphoprotein | 2  |                       | WLPAGTGPQAFSR                                 | 22  | 13 | 4  | 31.98 | b6b8y10y11                       | 1387.72 | 62.101  | 39535 | 2 | 694.37  | 8.269   |
| P50552 VASP_HUMAN Vasodilator-stimulated phosphoprotein | 3  | Carbamidomethyl+C(13) | SSSVTTSETQPCTPSSSDYSDLQR                      | 321 | 25 | 11 | 40.66 | b1b6b10°b10y7*y7y8y11°y11y12°y12 | 2707.12 | 47.313  | 10288 | 4 | 677.54  | -14.610 |
| P50552 VASP_HUMAN Vasodilator-stimulated phosphoprotein | 4  |                       | QQPGPSEHIER                                   | 143 | 11 | 8  | 82.27 | b7y4y5y6°y6y7y8y9                | 1277.62 | 24.473  | 17858 | 3 | 426.54  | -4.491  |
| P50552 VASP_HUMAN Vasodilator-stimulated phosphoprotein | 5  |                       | SGGGGLMEEMNAMLAR                              | 257 | 16 | 9  | 51.63 | b4b5b7y6y8*y8y9°y9y15            | 1623.74 | 88.497  | 15518 | 2 | 812.37  | 6.240   |
| P50552 VASP_HUMAN Vasodilator-stimulated phosphoprotein | 6  |                       | VPAQSESVR                                     | 298 | 9  | 4  | 28.49 | b4y5°y5y6                        | 972.49  | 24.992  | 4676  | 2 | 486.75  | -16.820 |
| P50552 VASP_HUMAN Vasodilator-stimulated phosphoprotein | 7  |                       | QEEASGGPTAPK                                  | 240 | 12 | 3  | 20.51 | b4b7y11                          | 1171.56 | 40.573  | 3404  | 2 | 586.28  | -0.729  |
| P50552 VASP_HUMAN Vasodilator-stimulated phosphoprotein | 8  |                       | YNQATPNFHQWR                                  | 71  | 12 | 11 | 84.41 | b3b7°b7b8*b8b10y3y4y9°y9y10      | 1561.72 | 41.814  | 3202  | 2 | 781.36  | -8.129  |
| P50552 VASP_HUMAN Vasodilator-stimulated phosphoprotein | 9  | Carbamidomethyl+C(7)  | MSETVICSSR                                    | 0   | 10 | 6  | 37.44 | b5y5°y5y8°y8y9                   | 1169.55 | 33.104  | 2231  | 2 | 585.28  | 17.013  |
| P50552 VASP_HUMAN Vasodilator-stimulated phosphoprotein | 10 | Carbamidomethyl+C(6)  | SETVICSSRATVMLYDDGNK                          | 1   | 20 | 7  | 28.82 | y5y9°y9y12y13°y13*y13            | 2246.06 | 77.351  | 29671 | 2 | 1123.54 | 9.131   |
| P50552 VASP_HUMAN Vasodilator-stimulated phosphoprotein | 11 |                       | AESGRSGGGGLMEEMNAMLAR                         | 252 | 21 | 12 | 82.09 | b3b5°b5b7b9b10b11y7y8y11°y11y12  | 2123.98 | 108.128 | 6335  | 2 | 1062.49 | 6.437   |
| P50552 VASP_HUMAN Vasodilator-stimulated phosphoprotein | 12 | Carbamidomethyl+C(13) | SSSVTTSETQPCTPSSSDYSDLQRVK                    | 321 | 27 | 3  | 17.36 | y4y9y11                          | 2934.36 | 64.218  | 5588  | 3 | 978.79  | 10.899  |
| P50552 VASP_HUMAN Vasodilator-stimulated phosphoprotein | 13 |                       | EDAAQFAAGMASALEALEGGGPPPPPALPTWSVPNGSPSEVEQQR | 96  | 47 | 8  | 23.5  | b5°b5b22y9y11y13y14y26           | 4781.32 | 111.940 | 4995  | 4 | 1196.08 | 0.409   |
| P50552 VASP_HUMAN Vasodilator-stimulated phosphoprotein | 14 | Carbamidomethyl+C(7)  | MSETVICSSRATVMLYDDGNK                         | 0   | 21 | 7  | 33.65 | b7b10y3y7*y7y11y14               | 2377.09 | 94.465  | 3176  | 2 | 1189.05 | 2.260   |
| P50552 VASP_HUMAN Vasodilator-stimulated phosphoprotein | 15 |                       | TPKDESANQEEPEAR                               | 283 | 15 | 3  | 16.6  | b3b12y10                         | 1700.79 | 64.955  | 2652  | 2 | 850.90  | 12.345  |
| P50552 VASP_HUMAN Vasodilator-stimulated phosphoprotein | 16 |                       | VSKQEEASGGPTAPK                               | 237 | 15 | 3  | 22.62 | b8y13y14                         | 1485.74 | 41.897  | 2389  | 2 | 743.37  | -10.024 |
| P08514 ITA2B_HUMAN Integrin alpha-Iib                   | 1  |                       | GPHALGAPSLLLTGTQLYGR                          | 366 | 20 | 10 | 48.61 | b4b6b10b20y2y3y6y7y8y20          | 2022.10 | 77.889  | 66244 | 3 | 674.70  | -8.150  |

|                                       |    |                                                                          |                                   |     |    |    |       |                                        |         |         |       |   |         |         |
|---------------------------------------|----|--------------------------------------------------------------------------|-----------------------------------|-----|----|----|-------|----------------------------------------|---------|---------|-------|---|---------|---------|
| P08514 ITA2B_HUMAN Integrin alpha-IIb | 2  | Carbamidomethyl+C(6)                                                     | AEGGQCPSLLFDLR                    | 90  | 14 | 4  | 29.15 | b5y3y8y11                              | 1562.77 | 79.389  | 66226 | 2 | 781.89  | 1.953   |
| P08514 ITA2B_HUMAN Integrin alpha-IIb | 3  |                                                                          | IVLLDVPVR                         | 765 | 9  | 7  | 42.7  | b2b3y4y5°y5y7y9                        | 1023.65 | 73.421  | 62626 | 2 | 512.33  | -5.724  |
| P08514 ITA2B_HUMAN Integrin alpha-IIb | 4  |                                                                          | SRPSQVLDSPFPTGSAFGFSLR            | 431 | 22 | 5  | 23.06 | b8b11y6y8y10                           | 2353.19 | 86.739  | 59139 | 3 | 785.07  | -3.528  |
| P08514 ITA2B_HUMAN Integrin alpha-IIb | 5  |                                                                          | ALSNVEGFER                        | 692 | 10 | 15 | 94.24 | b2b4°b4*b4b5b9y4y5°y5y6y7°y7y8*y8y10   | 1121.56 | 47.958  | 48326 | 2 | 561.28  | -1.306  |
| P08514 ITA2B_HUMAN Integrin alpha-IIb | 6  | Carbamidomethyl+C(4)                                                     | VVLCELGNPMKK                      | 714 | 12 | 5  | 33.73 | b2y9y10y11y12                          | 1387.73 | 53.937  | 41488 | 3 | 463.25  | -10.380 |
| P08514 ITA2B_HUMAN Integrin alpha-IIb | 7  |                                                                          | VYLFLQPR                          | 358 | 8  | 6  | 38.8  | b2y1y4y5y6y8                           | 1035.59 | 72.447  | 41008 | 2 | 518.30  | -4.715  |
| P08514 ITA2B_HUMAN Integrin alpha-IIb | 8  | Carbamidomethyl+C(15)                                                    | TLGPSQEETGGVFLCPWR                | 72  | 18 | 14 | 80.42 | b1°b1b6b13b14*b14y3y4y5y6y11°y11y12y18 | 2033.98 | 80.683  | 40607 | 2 | 1017.49 | 3.001   |
| P08514 ITA2B_HUMAN Integrin alpha-IIb | 9  |                                                                          | VAIVVGAPR                         | 63  | 9  | 7  | 70.62 | b3y4y5y6y7y8y9                         | 881.55  | 46.424  | 40576 | 2 | 441.28  | -4.777  |
| P08514 ITA2B_HUMAN Integrin alpha-IIb | 10 |                                                                          | FGSAIAPLGDLDLDRDGYNDIAVAAPYGGPSGR | 386 | 31 | 10 | 27.12 | b2b4b6b17y8y10y17°y17y25y31            | 3092.51 | 80.080  | 32642 | 3 | 1031.51 | 0.947   |
| P08514 ITA2B_HUMAN Integrin alpha-IIb | 11 | Carbamidomethyl+C(2)                                                     | SCVLPQTK                          | 502 | 8  | 8  | 46.48 | b2°b2b3b4b5y4°y4y8                     | 932.49  | 32.160  | 18459 | 2 | 466.75  | 0.000   |
| P08514 ITA2B_HUMAN Integrin alpha-IIb | 12 |                                                                          | IYVENDFSWDK                       | 184 | 11 | 5  | 47.92 | y4y6y8y9*y9                            | 1415.63 | 44.939  | 4242  | 2 | 708.32  | -10.692 |
| P08514 ITA2B_HUMAN Integrin alpha-IIb | 13 |                                                                          | HDLLVGAPLYMESR                    | 334 | 14 | 6  | 36.35 | b1y4y7°y7y8y11                         | 1600.82 | 60.969  | 3515  | 3 | 534.28  | 5.262   |
| P08514 ITA2B_HUMAN Integrin alpha-IIb | 14 | Carbamidomethyl+C(17)                                                    | QGLGASVVSWSDVVACAPWQHWNVLEK       | 121 | 28 | 4  | 16    | b11y8y12y24                            | 3136.56 | 88.407  | 2291  | 4 | 784.89  | -3.814  |
| P08514 ITA2B_HUMAN Integrin alpha-IIb | 15 | Carbamidomethyl+C(6)                                                     | TPVGCFLAQPEGR                     | 155 | 16 | 4  | 25.44 | b6b8b11y5                              | 1761.88 | 54.180  | 1660  | 2 | 881.44  | 6.166   |
| P08514 ITA2B_HUMAN Integrin alpha-IIb | 16 |                                                                          | FGSAIAPLGDLDLDR                   | 386 | 13 | 3  | 28.19 | y5y7y12                                | 1331.70 | 70.686  | 19385 | 2 | 666.35  | -0.275  |
| P08514 ITA2B_HUMAN Integrin alpha-IIb | 17 | Carbamidomethyl+C(3)                                                     | LICNQK                            | 702 | 6  | 4  | 37.84 | b4b5*b5y4                              | 775.41  | 27.370  | 6070  | 2 | 388.21  | -2.361  |
| P08514 ITA2B_HUMAN Integrin alpha-IIb | 18 | Carbamidomethyl+C(9);<br>Carbamidomethyl+C(14);<br>Carbamidomethyl+C(19) | LQDPVLSVCSAPCTVVQCDLQEMAR         | 902 | 26 | 5  | 21.33 | b12y7°y7y10y11                         | 2991.43 | 89.718  | 5519  | 5 | 599.09  | 20.404  |
| P08514 ITA2B_HUMAN Integrin alpha-IIb | 19 |                                                                          | GNSFPASLVVAAEEGER                 | 782 | 17 | 10 | 58.05 | b3°b3b11y5y6°y6y7y9°y9y10              | 1732.84 | 62.785  | 3871  | 3 | 578.29  | -4.649  |
| P08514 ITA2B_HUMAN Integrin alpha-IIb | 20 | Carbamidomethyl+C(5);<br>Carbamidomethyl+C(11)                           | TPVSCFNQMCVATGHNIPQK              | 510 | 22 | 5  | 22.45 | b7b12b13y10°y10                        | 2459.15 | 107.335 | 2294  | 3 | 820.39  | -3.276  |
| P08514 ITA2B_HUMAN Integrin alpha-IIb | 21 |                                                                          | QIFLPEPEQPSR                      | 890 | 12 | 4  | 20.51 | b3b11y8*y8                             | 1440.77 | 39.524  | 2087  | 2 | 720.89  | 18.555  |
| P08514 ITA2B_HUMAN Integrin alpha-IIb | 22 |                                                                          | LRAEQMASYFGHSVAVTDVNGDGR          | 310 | 24 | 5  | 25.2  | b3b14y13y14y21                         | 2580.21 | 70.791  | 61660 | 4 | 645.81  | -6.056  |
| P08514 ITA2B_HUMAN Integrin alpha-IIb | 23 | Carbamidomethyl+C(12)                                                    | TEEAEKTPVGCFLAQPEGR               | 149 | 21 | 4  | 19.84 | b5b8b11y5                              | 2293.07 | 53.659  | 17441 | 3 | 765.03  | -1.171  |
| P08514 ITA2B_HUMAN Integrin alpha-IIb | 24 |                                                                          | IYVENDFSWDKR                      | 184 | 12 | 7  | 33.63 | b5*b5b6°b6y4°y4y8                      | 1571.75 | 73.884  | 17217 | 3 | 524.59  | -0.854  |
| P08514 ITA2B_HUMAN Integrin alpha-IIb | 25 | Carbamidomethyl+C(6)                                                     | AEYSPCRGNTLSR                     | 171 | 13 | 3  | 26.43 | b3b11b12                               | 1510.73 | 80.576  | 10370 | 2 | 755.87  | 12.767  |
| P08514 ITA2B_HUMAN Integrin alpha-IIb | 26 | Carbamidomethyl+C(17)                                                    | QGLGASVVSWSDVVACAPWQHWNVLEKTEEAEK | 121 | 34 | 7  | 25.52 | b3b5b7*b7y4y5y8                        | 3823.91 | 116.307 | 7122  | 4 | 956.73  | 9.066   |
| P08514 ITA2B_HUMAN Integrin alpha-IIb | 27 | Carbamidomethyl+C(9)                                                     | ENETRVVLCELGNPMK                  | 709 | 16 | 5  | 22.23 | b5b6y9°y9*y9                           | 1888.94 | 87.536  | 6329  | 3 | 630.32  | 9.952   |
| P08514 ITA2B_HUMAN Integrin alpha-IIb | 28 |                                                                          | GNTLSRIYVENDFSWDK                 | 178 | 17 | 4  | 27.76 | b4b11y3y4                              | 2043.99 | 65.833  | 4017  | 2 | 1022.50 | 4.658   |
| P08514 ITA2B_HUMAN Integrin alpha-IIb | 29 | Carbamidomethyl+C(5)                                                     | HSPICHTTMAFLRDEADFR               | 571 | 19 | 6  | 29.59 | y3°y3y4y7y10°y10                       | 2304.09 | 82.710  | 1694  | 2 | 1152.55 | 12.292  |

|                                         |    |                                                                                     |                               |     |    |    |       |                                  |         |         |        |   |         |         |
|-----------------------------------------|----|-------------------------------------------------------------------------------------|-------------------------------|-----|----|----|-------|----------------------------------|---------|---------|--------|---|---------|---------|
| P08514 ITA2B_HUMAN Integrin alpha-IIb   | 30 | Carbamidomethyl+C(5); Oxidation+M(9)                                                | HSPICHTTMAFLRDEADFRDK         | 571 | 21 | 5  | 35.59 | b5b8b9y8y9                       | 2563.15 | 43.815  | 42837  | 3 | 855.06  | -11.620 |
| P08514 ITA2B_HUMAN Integrin alpha-IIb   | 31 | Carbamidomethyl+C(9); Carbamidomethyl+C(14); Carbamidomethyl+C(19); Oxidation+M(24) | LQDPVLVSCDSAPCTVVQC DLQEMAR   | 902 | 26 | 6  | 25.24 | b10*b10y3y4y6y11                 | 3007.38 | 95.420  | 14522  | 3 | 1003.13 | 4.059   |
| P08514 ITA2B_HUMAN Integrin alpha-IIb   | 32 | Carbamidomethyl+C(5); Carbamidomethyl+C(11); Oxidation+M(10)                        | TPVSCFNQMVCVGATGHNPQK         | 510 | 22 | 7  | 41.09 | b5b6b8b13*b13b14*b14             | 2475.17 | 75.302  | 1808   | 2 | 1238.09 | 3.058   |
| P08514 ITA2B_HUMAN Integrin alpha-IIb   | 33 | Carbamidomethyl+C(2)                                                                | LCELGNPMKK                    | 716 | 10 | 1  | 7.36  | b3                               | 1189.60 | 53.969  | 7606   | 2 | 595.31  | -3.078  |
| P08514 ITA2B_HUMAN Integrin alpha-IIb   | 34 |                                                                                     | SNVEGFER                      | 694 | 8  | 1  | 7.86  | b5                               | 937.44  | 47.905  | 1653   | 2 | 469.22  | -0.912  |
| P08514 ITA2B_HUMAN Integrin alpha-IIb   | 35 | Carbamidomethyl+C(3)                                                                | GQCPSLLFDLR                   | 93  | 11 | 0  | 4.32  |                                  | 1305.67 | 79.332  | 1501   | 2 | 653.34  | 5.142   |
| P02675 FIBB_HUMAN Fibrinogen beta chain | 1  |                                                                                     | IRPFPQQ                       | 483 | 8  | 7  | 63.71 | b2b4b6b7y3*y3y6                  | 1032.56 | 60.802  | 157116 | 2 | 516.78  | -6.029  |
| P02675 FIBB_HUMAN Fibrinogen beta chain | 2  | Carbamidomethyl+C(3); Carbamidomethyl+C(7)                                          | TPCTVSCNIPVVSGK               | 224 | 15 | 13 | 78.89 | b2b3*b3b9b10b11b13y1y3y4y6y10y15 | 1618.80 | 51.449  | 157108 | 2 | 809.90  | 2.564   |
| P02675 FIBB_HUMAN Fibrinogen beta chain | 3  |                                                                                     | DNENVVNEYSSELEK               | 163 | 15 | 12 | 72.17 | b4b5b14y2*y2y7y8y9y10*y10y12y15  | 1768.79 | 60.080  | 141572 | 2 | 884.90  | 1.449   |
| P02675 FIBB_HUMAN Fibrinogen beta chain | 4  |                                                                                     | HGTDDGVVWMNWK                 | 458 | 13 | 13 | 77.9  | b2b3b7b8*b8y2y4y5y6y7*y7y12y13   | 1544.71 | 71.064  | 52286  | 2 | 772.86  | 10.431  |
| P02675 FIBB_HUMAN Fibrinogen beta chain | 5  |                                                                                     | GGETSEMYLIQPDSSVKPYR          | 247 | 20 | 6  | 20.69 | b2b3y1y4y11y15                   | 2257.08 | 61.912  | 50332  | 3 | 753.03  | -0.757  |
| P02675 FIBB_HUMAN Fibrinogen beta chain | 6  | Carbamidomethyl+C(3)                                                                | NYCGLPGEYWLGNDK               | 313 | 15 | 4  | 27.13 | b3b11b13y10                      | 1785.81 | 74.754  | 49898  | 2 | 893.41  | 10.664  |
| P02675 FIBB_HUMAN Fibrinogen beta chain | 7  |                                                                                     | REEAPSLRPAPPISGGGYR           | 52  | 20 | 6  | 46.92 | b2b10y3y4y5y6                    | 2107.08 | 48.022  | 38154  | 4 | 527.53  | -9.617  |
| P02675 FIBB_HUMAN Fibrinogen beta chain | 8  |                                                                                     | AHYGGFTVQNEANK                | 353 | 14 | 9  | 52.81 | b2b3b10y6*y6y7y11y12y14          | 1535.71 | 38.813  | 27246  | 3 | 512.58  | -6.439  |
| P02675 FIBB_HUMAN Fibrinogen beta chain | 9  |                                                                                     | SILENLR                       | 199 | 7  | 5  | 38.32 | y2y3y4y5*y5                      | 844.49  | 55.373  | 24955  | 1 | 844.49  | 3.686   |
| P02675 FIBB_HUMAN Fibrinogen beta chain | 10 | Carbamidomethyl+C(3); Carbamidomethyl+C(7); Carbamidomethyl+C(17)                   | TPCTVSCNIPVSGKECEEIIR         | 224 | 22 | 6  | 48.5  | y6y10y11y12y13y22                | 2548.23 | 61.366  | 24490  | 3 | 850.08  | 4.503   |
| P02675 FIBB_HUMAN Fibrinogen beta chain | 11 |                                                                                     | HQLYIDETVNSNIPTNLR            | 178 | 18 | 5  | 28.14 | b7b13y3y5y9                      | 2127.09 | 62.937  | 19470  | 2 | 1064.05 | 2.984   |
| P02675 FIBB_HUMAN Fibrinogen beta chain | 12 |                                                                                     | NSVDELNNNVEAVSQTSSSSSFQYMYLLK | 124 | 28 | 10 | 39.95 | b2b3b4b10b11b27y2y4y11y28        | 3167.49 | 89.422  | 14152  | 2 | 1584.25 | 2.929   |
| P02675 FIBB_HUMAN Fibrinogen beta chain | 13 |                                                                                     | YQISVNK                       | 367 | 7  | 3  | 35.31 | b6y4y5                           | 851.46  | 35.475  | 24848  | 2 | 426.23  | -6.882  |
| P02675 FIBB_HUMAN Fibrinogen beta chain | 14 |                                                                                     | EEAPSLRPAPPISGGGYR            | 53  | 19 | 12 | 77.28 | b3b4b6b9*b9y5y6y8*y8y9y10y16     | 1951.01 | 51.810  | 21866  | 2 | 976.01  | 5.318   |
| P02675 FIBB_HUMAN Fibrinogen beta chain | 15 |                                                                                     | DLWQK                         | 152 | 5  | 2  | 12.45 | b4*b4                            | 689.35  | 39.470  | 13004  | 1 | 689.35  | -14.343 |
| P02675 FIBB_HUMAN Fibrinogen beta chain | 16 |                                                                                     | EDGGGWYNR                     | 426 | 10 | 3  | 31.98 | y4y6y7                           | 1239.52 | 61.042  | 8683   | 2 | 620.26  | 3.053   |
| P02675 FIBB_HUMAN Fibrinogen beta chain | 17 |                                                                                     | MVSWSFHK                      | 3   | 8  | 4  | 51.25 | b3b7y3y7                         | 1021.48 | 41.796  | 4045   | 2 | 511.24  | -15.834 |
| P02675 FIBB_HUMAN Fibrinogen beta chain | 18 |                                                                                     | MGPTELLIEMEDWK                | 334 | 14 | 4  | 17.67 | b8b12y4*y4                       | 1691.80 | 120.327 | 3025   | 2 | 846.40  | -3.319  |
| P02675 FIBB_HUMAN Fibrinogen beta chain | 19 | Carbamidomethyl+C(12)                                                               | LESDVSAQMEYCR                 | 211 | 13 | 11 | 83.47 | b3*b3b5b6b7*b7y3y5y9y11*y11      | 1587.69 | 49.783  | 2077   | 2 | 794.35  | 5.536   |

|                                         |    |                                                                    |                                       |     |    |    |        |                                                                            |         |         |        |   |         |         |
|-----------------------------------------|----|--------------------------------------------------------------------|---------------------------------------|-----|----|----|--------|----------------------------------------------------------------------------|---------|---------|--------|---|---------|---------|
| P02675 FIBB_HUMAN Fibrinogen beta chain | 20 |                                                                    | DNDGWLTS DPR                          | 410 | 11 | 8  | 89.95  | b4b6b8b9y3y4y5y10                                                          | 1275.59 | 43.279  | 2002   | 2 | 638.30  | 20.767  |
| P02675 FIBB_HUMAN Fibrinogen beta chain | 21 | Carbamidomethyl+C(8); Carbamidomethyl+C(19); Carbamidomethyl+C(23) | KAPDAGGCLHADPDLGVLCPTGC QLQEALLQQRPIR | 87  | 37 | 25 | 157.92 | b4b9b10b12b14b16b17b18b19y3y4y10y11y12*y12y15y18*y18y19*y19y20y22y23y25y35 | 4083.97 | 78.981  | 234381 | 5 | 817.60  | -11.597 |
| P02675 FIBB_HUMAN Fibrinogen beta chain | 22 |                                                                    | AHYGGFTVQNEANKYQISVNK                 | 353 | 21 | 3  | 12.79  | b5b7y4                                                                     | 2368.14 | 53.657  | 148698 | 4 | 592.79  | -13.196 |
| P02675 FIBB_HUMAN Fibrinogen beta chain | 23 |                                                                    | MGPTELLIEMEDWKGDK                     | 334 | 17 | 3  | 23.58  | y3y4y15                                                                    | 1991.93 | 90.514  | 148381 | 3 | 664.65  | -9.499  |
| P02675 FIBB_HUMAN Fibrinogen beta chain | 24 |                                                                    | NSVDELNNNVEAVSQTSSSFQY MYLLKDLWQK     | 124 | 33 | 3  | 22.02  | b7b8y5                                                                     | 3837.80 | 117.478 | 94012  | 3 | 1279.94 | -5.980  |
| P02675 FIBB_HUMAN Fibrinogen beta chain | 25 |                                                                    | DNENVVNEYSSELEKHLYIDETV NSNIPTNLR     | 163 | 33 | 4  | 22.68  | y4y5*y5y11                                                                 | 3876.84 | 84.108  | 51396  | 4 | 969.96  | -4.219  |
| P02675 FIBB_HUMAN Fibrinogen beta chain | 26 | Carbamidomethyl+C(3)                                               | NYCGLPGEYWLGNDKISQLTR                 | 313 | 21 | 3  | 12.79  | b5y16y19                                                                   | 2484.20 | 79.684  | 31119  | 3 | 828.74  | -0.885  |
| P02675 FIBB_HUMAN Fibrinogen beta chain | 27 |                                                                    | REEAPSLRPAPPPISGGGYR                  | 52  | 20 | 5  | 34.12  | b3*b3y5y6y7                                                                | 2107.09 | 74.475  | 11095  | 3 | 703.04  | -5.098  |
| P02675 FIBB_HUMAN Fibrinogen beta chain | 28 |                                                                    | YRGTAGNALMDGASQLMGENR                 | 374 | 21 | 9  | 27.14  | b6b15y4*y4y5*y5y7*y7                                                       | 2212.01 | 63.351  | 3735   | 3 | 738.01  | -6.733  |
| P02675 FIBB_HUMAN Fibrinogen beta chain | 29 | Carbamidomethyl+C(1)                                               | CHAANPNGRYWGQYTWDMAK                  | 436 | 22 | 6  | 27.74  | b10y6y7y9*y9y16                                                            | 2646.14 | 125.115 | 3477   | 2 | 1323.57 | -0.461  |
| P02675 FIBB_HUMAN Fibrinogen beta chain | 30 | Carbamidomethyl+C(3)                                               | VYCDMNTENGWTVIQRQDGS VDFGR            | 267 | 27 | 5  | 21.16  | b5b6b11y6*y6                                                               | 3118.35 | 28.258  | 2637   | 3 | 1040.12 | -6.655  |
| P02675 FIBB_HUMAN Fibrinogen beta chain | 31 |                                                                    | TMTIHNGMFFSTYDRDNDGWLTS DPR           | 395 | 26 | 9  | 41.37  | b3*b3b5y3y5*y5y6y7y13                                                      | 3077.38 | 97.904  | 2592   | 3 | 1026.47 | 10.234  |
| P02675 FIBB_HUMAN Fibrinogen beta chain | 32 |                                                                    | QVKDNNVVNEYSSELEK                     | 160 | 18 | 11 | 54.74  | b3b4*b4*b4b7*b7b13y5y6y13y17                                               | 2124.00 | 93.606  | 1682   | 2 | 1062.50 | -3.678  |
| P02675 FIBB_HUMAN Fibrinogen beta chain | 33 | Phosphoryl STY(16)                                                 | NSVDELNNNVEAVSQTSSSFQY MYLLK          | 124 | 28 | 3  | 21.36  | b13b14y13                                                                  | 3247.49 | 71.187  | 16663  | 3 | 1083.17 | 14.660  |
| P02675 FIBB_HUMAN Fibrinogen beta chain | 34 | Phosphoryl STY(15)                                                 | HQLYIDETVNSNIPTNLR                    | 178 | 18 | 6  | 34.15  | b3b6b8b13*b13y5                                                            | 2207.05 | 83.989  | 10993  | 3 | 736.35  | 2.544   |
| P02675 FIBB_HUMAN Fibrinogen beta chain | 35 | Oxidation+M(8)                                                     | TMTIHNGMFFSTYDRDNDGWLTS DPR           | 395 | 26 | 9  | 28.13  | b3*b3b10y5y9*y9y10*y10y12                                                  | 3093.35 | 118.264 | 12422  | 4 | 774.09  | 1.263   |
| P02675 FIBB_HUMAN Fibrinogen beta chain | 36 | Oxidation+M(24)                                                    | NSVDELNNNVEAVSQTSSSFQY MYLLK          | 124 | 28 | 5  | 21.01  | b16y10*y10y13y14                                                           | 3183.52 | 89.525  | 3256   | 3 | 1061.84 | 12.194  |
| P02675 FIBB_HUMAN Fibrinogen beta chain | 37 | Oxidation+M(8)                                                     | GTAGNALMDGASQLMGENR                   | 376 | 19 | 3  | 13.7   | b11y4y16                                                                   | 1908.86 | 81.905  | 2665   | 3 | 636.96  | 3.517   |
| P02675 FIBB_HUMAN Fibrinogen beta chain | 38 | Oxidation+M(24)                                                    | NSVDELNNNVEAVSQTSSSFQY MYLLKDLWQK     | 124 | 33 | 3  | 10.88  | b4b15y21                                                                   | 3853.78 | 108.161 | 1801   | 4 | 964.20  | -10.770 |
| P02675 FIBB_HUMAN Fibrinogen beta chain | 39 |                                                                    | REEAPSLRPAP                           | 52  | 11 | 1  | 7.9    | y3                                                                         | 1222.64 | 48.047  | 36492  | 2 | 611.82  | -10.483 |
| P00924 ENO1_YEAST Enolase 1             | 1  |                                                                    | NVNDVIAPAFVK                          | 67  | 12 | 4  | 27.71  | b2y5y6y10                                                                  | 1286.70 | 65.671  | 107933 | 2 | 643.85  | -6.261  |
| P00924 ENO1_YEAST Enolase 1             | 2  |                                                                    | SIVPSGASTGVHEALEMR                    | 32  | 18 | 11 | 57.01  | b1b2b3y5y6y11y13*y13y14y15y18                                              | 1840.91 | 60.726  | 73152  | 3 | 614.31  | -6.830  |
| P00924 ENO1_YEAST Enolase 1             | 3  |                                                                    | VNQIGTLSSEIK                          | 346 | 12 | 7  | 60.86  | b2y3y5y8y9y10y12                                                           | 1288.71 | 53.932  | 72391  | 2 | 644.86  | -4.452  |
| P00924 ENO1_YEAST Enolase 1             | 4  |                                                                    | IGSEVYHNLK                            | 185 | 10 | 6  | 49.2   | y2y3y4y5y9y10                                                              | 1159.59 | 36.901  | 70591  | 3 | 387.20  | -13.895 |
| P00924 ENO1_YEAST Enolase 1             | 5  |                                                                    | IEEELGDNAVFAFENFHGGDK                 | 415 | 21 | 15 | 83.51  | b2*b2b3*b3b4b6b7b10*b10y3y5y6y8y9y11                                       | 2328.02 | 57.092  | 37927  | 4 | 582.76  | -13.109 |
| P00924 ENO1_YEAST Enolase 1             | 6  |                                                                    | IATAIEK                               | 330 | 7  | 5  | 50.77  | y3y4y5y6y7                                                                 | 745.44  | 27.662  | 13428  | 2 | 373.22  | -10.480 |
| P00924 ENO1_YEAST Enolase 1             | 7  |                                                                    | AADALLK                               | 338 | 8  | 8  | 101.07 | b3b5b6y3y4y5y6y7                                                           | 814.49  | 52.578  | 65603  | 2 | 407.75  | -15.212 |
| P00924 ENO1_YEAST Enolase 1             | 8  |                                                                    | YDLDFK                                | 258 | 6  | 6  | 50.29  | b3y3*y3y4y5*y5                                                             | 800.37  | 54.233  | 51316  | 2 | 400.69  | -9.914  |
| P00924 ENO1_YEAST Enolase 1             | 9  |                                                                    | LNQLLR                                | 409 | 6  | 2  | 25.39  | y4y5                                                                       | 756.46  | 41.631  | 44705  | 2 | 378.74  | -10.489 |
| P00924 ENO1_YEAST Enolase 1             | 10 | Carbamidomethyl+C(5)                                               | IGLDCASSEFFK                          | 243 | 12 | 7  | 44.84  | b4b6*b6b7y5*y5y6                                                           | 1373.66 | 91.343  | 15484  | 2 | 687.33  | 14.041  |
| P00924 ENO1_YEAST Enolase 1             | 11 |                                                                    | SVYDSR                                | 9   | 6  | 2  | 25.39  | b4y4                                                                       | 726.35  | 76.253  | 6851   | 1 | 726.35  | 8.739   |
| P00924 ENO1_YEAST Enolase 1             | 12 |                                                                    | YGASAGNVGDEGGVAPNIQTAEELDLIVDAIK      | 201 | 33 | 5  | 20.22  | b10b12b18b21y4                                                             | 3257.56 | 84.028  | 3601   | 3 | 1086.53 | -17.312 |



|                                                             |    |                       |                                        |     |    |    |        |                                                 |         |         |        |   |         |         |
|-------------------------------------------------------------|----|-----------------------|----------------------------------------|-----|----|----|--------|-------------------------------------------------|---------|---------|--------|---|---------|---------|
| P00924 ENO1_YEAST Enolase 1                                 | 13 |                       | AAQDSFAAGWGMVSHR                       | 358 | 17 | 11 | 76.84  | b3b7b16°b16y3y5°y5y7y11y12y16                   | 1789.82 | 95.948  | 1647   | 2 | 895.41  | -14.595 |
| P00924 ENO1_YEAST Enolase 1                                 | 14 |                       | RYGASAGNVGDEGGVAPNIQTAE<br>EALDLIVDAIK | 200 | 34 | 11 | 64.12  | b6b8°b8b10°b10b11b12b13°b13b16b17               | 3413.74 | 126.471 | 72683  | 3 | 1138.59 | 6.794   |
| P00924 ENO1_YEAST Enolase 1                                 | 15 |                       | IEEELGDNAVFAGENFHGGDKL                 | 415 | 22 | 4  | 18.94  | y5°y5y10y12                                     | 2441.10 | 63.364  | 51228  | 4 | 611.03  | -13.402 |
| P00924 ENO1_YEAST Enolase 1                                 | 16 | Carbamidomethyl+C(5)  | IGLDCASSEFFKDGK                        | 243 | 15 | 7  | 34.02  | b7b10b12y4°y4y9°y9                              | 1673.79 | 42.623  | 3525   | 4 | 419.20  | 3.792   |
| P00924 ENO1_YEAST Enolase 1                                 | 17 |                       | VYARSVYDSR                             | 5   | 10 | 3  | 24.99  | b3y5y9                                          | 1215.62 | 69.611  | 3154   | 2 | 608.31  | 8.937   |
| P00924 ENO1_YEAST Enolase 1                                 | 18 |                       | YDLDFKNPNSDK                           | 258 | 12 | 5  | 29.65  | b7°b7b10y4y9                                    | 1455.69 | 58.545  | 2389   | 2 | 728.35  | 9.224   |
| P00924 ENO1_YEAST Enolase 1                                 | 19 | Phosphoryl STY(14)    | TAGIQIVADDLTVTNPK                      | 312 | 17 | 6  | 38.07  | b12b14b15°b15y8y9                               | 1835.91 | 76.222  | 3015   | 2 | 918.46  | 1.064   |
| P00924 ENO1_YEAST Enolase 1                                 | 20 |                       | PSGASTGVHEALEMR                        | 35  | 15 | 1  | 7.56   | b12                                             | 1541.76 | 60.715  | 7162   | 2 | 771.38  | 11.322  |
| P00924 ENO1_YEAST Enolase 1                                 | 21 |                       | ENFHHGDK                               | 428 | 8  | 0  | 7.68   |                                                 | 983.43  | 57.118  | 4439   | 1 | 983.43  | -5.772  |
| P00924 ENO1_YEAST Enolase 1                                 | 22 |                       | SEVYHNLK                               | 187 | 8  | 0  | 2.4    |                                                 | 989.51  | 36.935  | 2208   | 2 | 495.26  | 5.613   |
| O00299 CLIC1_HUMAN Chloride intracellular channel protein 1 | 1  |                       | LAALNPESNTAGLDIFAK                     | 95  | 18 | 12 | 83.89  | b3b5y2y3y4y5y11y12y13°y13y14y18                 | 1844.98 | 80.521  | 69339  | 2 | 922.99  | 3.110   |
| O00299 CLIC1_HUMAN Chloride intracellular channel protein 1 | 2  |                       | VLDNYLTSPLPEEVDDETSAEDEGV<br>SQRK      | 138 | 28 | 7  | 23.8   | b2b5b6y1y4y10y28                                | 3120.50 | 70.226  | 31637  | 3 | 1040.84 | 3.443   |
| O00299 CLIC1_HUMAN Chloride intracellular channel protein 1 | 3  | Carbamidomethyl+C(4)  | IGNCPFSQR                              | 20  | 9  | 5  | 42.7   | b3y3y4y5y9                                      | 1078.51 | 37.699  | 17585  | 2 | 539.76  | -0.226  |
| O00299 CLIC1_HUMAN Chloride intracellular channel protein 1 | 4  | Carbamidomethyl+C(2)  | LCPGGQLPFLLYGTEVHTDTNK                 | 57  | 22 | 3  | 18.94  | y3y15y20                                        | 2460.21 | 83.404  | 39129  | 3 | 820.74  | -4.565  |
| O00299 CLIC1_HUMAN Chloride intracellular channel protein 1 | 5  | Carbamidomethyl+C(12) | FLDGNELTLADCNLLPK                      | 166 | 17 | 7  | 58.05  | b7b8b12b13b14y3y10                              | 1932.97 | 84.895  | 28098  | 2 | 966.99  | 0.632   |
| O00299 CLIC1_HUMAN Chloride intracellular channel protein 1 | 6  |                       | NSNPALNDNLEK                           | 119 | 12 | 9  | 55.53  | b3b6°b6y4°y4y6y8°y8y9                           | 1328.64 | 37.431  | 25428  | 2 | 664.83  | 0.092   |
| O00299 CLIC1_HUMAN Chloride intracellular channel protein 1 | 7  |                       | GVTFNVTTVDTK                           | 37  | 12 | 3  | 30.72  | y3y6y8                                          | 1281.68 | 55.420  | 14946  | 2 | 641.34  | 6.000   |
| O00299 CLIC1_HUMAN Chloride intracellular channel protein 1 | 8  |                       | VLDNYLTSPLPEEVDDETSAEDEGV<br>SQR       | 138 | 27 | 9  | 23.81  | b6°b6°b6b12y3y8°y8y9°y9                         | 2992.38 | 74.479  | 13639  | 3 | 998.13  | -2.448  |
| O00299 CLIC1_HUMAN Chloride intracellular channel protein 1 | 9  | Carbamidomethyl+C(7)  | EEFASTCPDDEEIELAYEQVAK                 | 216 | 22 | 3  | 12.43  | b5y7y10                                         | 2573.18 | 98.951  | 6621   | 3 | 858.40  | 20.684  |
| O00299 CLIC1_HUMAN Chloride intracellular channel protein 1 | 10 |                       | YLSNAYAR                               | 208 | 8  | 4  | 31.02  | b4y5y6°y6                                       | 957.48  | 44.207  | 2826   | 2 | 479.24  | 1.466   |
| O00299 CLIC1_HUMAN Chloride intracellular channel protein 1 | 11 |                       | FSAYIKNSNPALNDNLEK                     | 113 | 18 | 7  | 29.9   | b8b13°b13y6y7°y7y11                             | 2038.04 | 61.015  | 144863 | 2 | 1019.52 | 7.248   |
| O00299 CLIC1_HUMAN Chloride intracellular channel protein 1 | 12 |                       | MAEEQPQVELFVKAGSDGAK                   | 0   | 20 | 3  | 21.34  | b10y4y5                                         | 2134.05 | 58.640  | 96626  | 2 | 1067.53 | -1.487  |
| O00299 CLIC1_HUMAN Chloride intracellular channel protein 1 | 13 | Carbamidomethyl+C(11) | AGSDGAKIGNCPFSQR                       | 13  | 16 | 7  | 38.3   | b3°b3b13°b13b15y11y12                           | 1664.79 | 44.144  | 9780   | 2 | 832.90  | 2.786   |
| O00299 CLIC1_HUMAN Chloride intracellular channel protein 1 | 14 | Carbamidomethyl+C(8)  | TETVQKLCPPGQLPFLLYGTEVH<br>TDTNK       | 51  | 28 | 6  | 21.01  | b8°b8y6°y6y8y9                                  | 3146.58 | 106.233 | 6153   | 3 | 1049.53 | -1.474  |
| O00299 CLIC1_HUMAN Chloride intracellular channel protein 1 | 15 |                       | VLDNYLTSPLPEEVDDETSAEDEGV<br>SQRK      | 138 | 28 | 3  | 17.17  | b5b8b15                                         | 3120.48 | 136.550 | 5259   | 2 | 1560.74 | -2.347  |
| O00299 CLIC1_HUMAN Chloride intracellular channel protein 1 | 16 |                       | AEEQPQVELFVKAGSDGAK                    | 1   | 19 | 6  | 34.28  | b6b7°b7b8y5°y5                                  | 2002.98 | 72.498  | 4300   | 3 | 668.33  | -11.762 |
| O00299 CLIC1_HUMAN Chloride intracellular channel protein 1 | 17 | Phosphoryl STY(8)     | GVTFNVTTVDTKR                          | 37  | 13 | 8  | 31.98  | b6°b6b7°b7y6°y6y10°y10                          | 1517.73 | 41.773  | 23748  | 3 | 506.58  | 4.182   |
| O00299 CLIC1_HUMAN Chloride intracellular channel protein 1 | 18 | Phosphoryl STY(7)     | VLDNYLTSPLPEEVDDETSAEDEGV<br>SQRK      | 138 | 28 | 5  | 21.01  | b6b7b9y9°y9                                     | 3200.44 | 67.622  | 5471   | 5 | 640.89  | -0.839  |
| O95810 SDPR_HUMAN Serum deprivation-response protein        | 1  |                       | VLIFQEENEIPASVFK                       | 156 | 17 | 17 | 110.52 | b2b3b4b8b9b10°b10b12y3y5y7y12y13°y13°y13y14y17  | 1962.06 | 89.213  | 107283 | 2 | 981.53  | 2.053   |
| O95810 SDPR_HUMAN Serum deprivation-response protein        | 2  |                       | LVNMLDAVQENQHK                         | 64  | 14 | 18 | 86.62  | b2b3y1y2y4°y4y5°y5°y5y7y8y9°y9y10°y10y12°y12y14 | 1638.81 | 59.540  | 72168  | 3 | 546.94  | -11.545 |
| O95810 SDPR_HUMAN Serum deprivation-response protein        | 3  |                       | SDGDPVQP AVLQVHQTS                     | 408 | 17 | 6  | 23.58  | b10°b10b11b13y1y17                              | 1777.88 | 53.165  | 19563  | 2 | 889.45  | 6.454   |

|                                                      |    |                      |                                     |     |    |    |       |                                                 |         |         |        |   |         |         |
|------------------------------------------------------|----|----------------------|-------------------------------------|-----|----|----|-------|-------------------------------------------------|---------|---------|--------|---|---------|---------|
| O95810 SDPR_HUMAN Serum deprivation-response protein | 4  |                      | QEKPSSPMPSPSTPSPSLNLGNTE<br>EAIR    | 19  | 29 | 4  | 11.05 | b12b15y15y29                                    | 3038.47 | 62.400  | 7774   | 3 | 1013.50 | -0.643  |
| O95810 SDPR_HUMAN Serum deprivation-response protein | 5  |                      | IVSVVER                             | 261 | 6  | 1  | 12.93 | y4                                              | 702.41  | 38.173  | 14394  | 1 | 702.41  | -6.430  |
| O95810 SDPR_HUMAN Serum deprivation-response protein | 6  |                      | GSNSGMSDNIDLTIIVEDEEEESVA<br>LEQAQK | 362 | 30 | 3  | 16.88 | y5y12y16                                        | 3237.49 | 76.256  | 12784  | 4 | 810.13  | 9.728   |
| O95810 SDPR_HUMAN Serum deprivation-response protein | 7  |                      | YEGSYALTSEEAEER                     | 394 | 14 | 5  | 29.15 | b4y3y10y12°y12                                  | 1604.68 | 48.643  | 8977   | 2 | 802.84  | -17.116 |
| O95810 SDPR_HUMAN Serum deprivation-response protein | 8  |                      | YQASTSNTVSK                         | 102 | 11 | 9  | 66.81 | b3b6b7°b7b8b9°b9°b9y9                           | 1185.56 | 34.935  | 1623   | 2 | 593.29  | -9.473  |
| O95810 SDPR_HUMAN Serum deprivation-response protein | 9  |                      | LENNHAQLLRR                         | 141 | 11 | 4  | 34.22 | b3b4°b4b5                                       | 1363.74 | 93.103  | 23195  | 3 | 455.25  | -9.220  |
| O95810 SDPR_HUMAN Serum deprivation-response protein | 10 |                      | MEQRQISLEGSVK                       | 78  | 13 | 4  | 18.95 | b3b6°b6y9                                       | 1504.79 | 65.736  | 20391  | 3 | 502.27  | 4.300   |
| O95810 SDPR_HUMAN Serum deprivation-response protein | 11 |                      | ISSGKSSPFK                          | 281 | 10 | 4  | 24.99 | b5y5y9°y9                                       | 1037.58 | 24.928  | 9021   | 2 | 519.29  | 12.471  |
| O95810 SDPR_HUMAN Serum deprivation-response protein | 12 |                      | LVNMLDAVQENQHKMEQR                  | 64  | 18 | 3  | 23.19 | y6y10y11                                        | 2183.05 | 65.884  | 4983   | 3 | 728.36  | -7.381  |
| O95810 SDPR_HUMAN Serum deprivation-response protein | 13 |                      | VRYEGSYALTSEEAEER                   | 392 | 16 | 3  | 15.7  | b4y12y14                                        | 1859.89 | 71.075  | 3173   | 2 | 930.45  | 9.517   |
| O95810 SDPR_HUMAN Serum deprivation-response protein | 14 |                      | QPVS GAVEGKEELPDENK                 | 173 | 18 | 3  | 14.27 | b16y4y17                                        | 1925.93 | 77.270  | 1858   | 2 | 963.47  | -10.268 |
| O95810 SDPR_HUMAN Serum deprivation-response protein | 15 | Oxidation+M(6)       | GSNSGMSDNIDLTIIVEDEEEESVA<br>LEQAQK | 362 | 30 | 3  | 16.88 | y5y11y13                                        | 3253.43 | 93.071  | 52713  | 4 | 814.11  | -7.804  |
| O95810 SDPR_HUMAN Serum deprivation-response protein | 16 | Oxidation+M(10)      | QEKPSSPMPSPSTPSPSLNLGNTE<br>EAIR    | 19  | 29 | 5  | 20.89 | b13y9y14*y14y15                                 | 3054.48 | 136.519 | 4986   | 2 | 1527.74 | 2.478   |
| O95810 SDPR_HUMAN Serum deprivation-response protein | 17 |                      | SPSLNLGNTEEAIR                      | 34  | 14 | 0  | 11.53 |                                                 | 1500.76 | 62.354  | 44751  | 2 | 750.88  | -4.555  |
| O95810 SDPR_HUMAN Serum deprivation-response protein | 18 |                      | NMLDAVQENQHK                        | 66  | 12 | 6  | 25.45 | b4°b4°b4b5°b5b9                                 | 1426.69 | 59.552  | 6088   | 2 | 713.85  | 7.530   |
| Q9Y247 FA50B_HUMAN Protein FAM50B                    | 1  | Carbamidomethyl+C(3) | ISCLSFALDDLDQADAAEARR               | 116 | 22 | 15 | 67.93 | b2°b2b5b6b7b13°b13b14°b14<br>y9°y9y10y13*y13y15 | 2452.14 | 94.447  | 30117  | 3 | 818.05  | 0.498   |
| Q9Y247 FA50B_HUMAN Protein FAM50B                    | 2  |                      | NPDVDTSLPDRDR                       | 144 | 14 | 5  | 25.45 | b2y2y4y5y8                                      | 1646.79 | 78.546  | 6528   | 3 | 549.60  | 7.635   |
| Q9Y247 FA50B_HUMAN Protein FAM50B                    | 3  |                      | LLSDATMEK                           | 275 | 9  | 6  | 28.49 | b5b7y2°y2y5y9                                   | 1007.51 | 45.716  | 5302   | 2 | 504.26  | 3.817   |
| Q9Y247 FA50B_HUMAN Protein FAM50B                    | 4  |                      | GTMREAGR                            | 5   | 8  | 3  | 34.03 | b5y4y7                                          | 877.42  | 42.605  | 3594   | 2 | 439.22  | -7.930  |
| Q9Y247 FA50B_HUMAN Protein FAM50B                    | 5  |                      | NPDVDTSLPDRDREEEENR                 | 144 | 20 | 3  | 20.65 | b10°b10b11                                      | 2433.10 | 68.787  | 2799   | 3 | 811.71  | 4.917   |
| Q9Y247 FA50B_HUMAN Protein FAM50B                    | 6  | Carbamidomethyl+C(3) | ISCLSFALDDLDQADAAEAR                | 116 | 21 | 4  | 19.84 | b9y3y6y10                                       | 2296.02 | 85.844  | 90974  | 3 | 766.01  | -9.889  |
| Q9Y247 FA50B_HUMAN Protein FAM50B                    | 7  |                      | DFLELR                              | 222 | 6  | 4  | 37.84 | b4°b4b5y3                                       | 792.43  | 30.675  | 8563   | 1 | 792.43  | 4.005   |
| Q9Y247 FA50B_HUMAN Protein FAM50B                    | 8  |                      | QHLEEQR                             | 91  | 7  | 7  | 66.24 | b3b4b6°b6y4y6°y6                                | 939.46  | 57.032  | 4010   | 2 | 470.24  | -1.559  |
| Q9Y247 FA50B_HUMAN Protein FAM50B                    | 9  |                      | LQQR                                | 98  | 5  | 1  | 12.45 | b4                                              | 673.37  | 29.803  | 3038   | 1 | 673.37  | 7.161   |
| Q9Y247 FA50B_HUMAN Protein FAM50B                    | 10 |                      | SGPLFSFDVHDDVRLSDATMEK              | 261 | 23 | 13 | 74.55 | b5b9b11°b11b12b17y3°y3y4°y<br>4y7y8y9           | 2579.24 | 121.432 | 147264 | 3 | 860.42  | -3.313  |
| Q9Y247 FA50B_HUMAN Protein FAM50B                    | 11 |                      | QHLEEQLQQR                          | 91  | 12 | 3  | 20.51 | b4b11y11                                        | 1593.79 | 54.272  | 142366 | 2 | 797.40  | -10.646 |
| Q9Y247 FA50B_HUMAN Protein FAM50B                    | 12 |                      | AQYKGTMR                            | 1   | 8  | 3  | 31.02 | b3b4y4                                          | 954.48  | 41.835  | 12180  | 2 | 477.75  | 1.535   |
| Q9Y247 FA50B_HUMAN Protein FAM50B                    | 13 |                      | EELRQEWEAQR                         | 166 | 11 | 3  | 22.46 | b5b9y5                                          | 1473.71 | 30.487  | 6727   | 3 | 491.91  | -1.160  |
| Q9Y247 FA50B_HUMAN Protein FAM50B                    | 14 |                      | VKDEEMEVTFSYWDGSGHR                 | 179 | 19 | 4  | 26.48 | b10b11y12y14                                    | 2272.01 | 77.307  | 6555   | 4 | 568.76  | 6.340   |

|                                   |    |                                             |                       |      |    |    |       |                                         |         |         |        |   |         |         |
|-----------------------------------|----|---------------------------------------------|-----------------------|------|----|----|-------|-----------------------------------------|---------|---------|--------|---|---------|---------|
| Q9Y247 FA50B_HUMAN Protein FAM50B | 15 |                                             | NPDVDTSFLPDRDR        | 144  | 14 | 6  | 36.07 | b8b9°b9*b9y6y7                          | 1646.76 | 49.790  | 2240   | 2 | 823.88  | -9.711  |
| P35580 MYH10_HUMAN Myosin-10      | 1  |                                             | TQLEELEDELQATEDAK     | 1545 | 17 | 9  | 49.38 | b4*b4b12b13y6y8y9y14y17                 | 1961.93 | 79.033  | 161985 | 2 | 981.47  | 3.795   |
| P35580 MYH10_HUMAN Myosin-10      | 2  |                                             | LDPHLVLDQLR           | 689  | 11 | 9  | 82.27 | b5y3y4*y4y5y6y7y9y11                    | 1318.74 | 71.280  | 118926 | 2 | 659.87  | -4.999  |
| P35580 MYH10_HUMAN Myosin-10      | 3  | Carbamidomethyl+C(9)                        | VEDMAELTCLNEASVLHNLK  | 86   | 20 | 9  | 34.14 | b2b3b5y2y4y5y13y18y20                   | 2286.10 | 79.887  | 84489  | 3 | 762.70  | -5.767  |
| P35580 MYH10_HUMAN Myosin-10      | 4  | Carbamidomethyl+C(4)                        | ADFCIIHYAGK           | 572  | 11 | 7  | 62.14 | y1y3y4y5y7y8y11                         | 1294.62 | 58.830  | 78073  | 2 | 647.81  | -3.300  |
| P35580 MYH10_HUMAN Myosin-10      | 5  |                                             | AGVLAHLEEER           | 771  | 11 | 17 | 92.51 | b1b2b3b6y1y2°y2y3°y3y4y5°y5y6y7°y7y8y11 | 1223.63 | 49.784  | 75274  | 2 | 612.32  | -3.492  |
| P35580 MYH10_HUMAN Myosin-10      | 6  | Carbamidomethyl+C(1)                        | CNGVLEGIR             | 700  | 9  | 10 | 58.17 | b1b2*b2b8*b8y1y3y4y5y7                  | 1017.51 | 48.819  | 51840  | 2 | 509.26  | -3.179  |
| P35580 MYH10_HUMAN Myosin-10      | 7  |                                             | LQAQMKDYQRELEEAR      | 1649 | 16 | 5  | 22.23 | b11b16y9*y9y10                          | 2008.01 | 61.781  | 18199  | 2 | 1004.51 | 10.517  |
| P35580 MYH10_HUMAN Myosin-10      | 8  |                                             | SLEAEILQEQELASSER     | 1683 | 18 | 5  | 31.81 | b11y3y4y8y10                            | 2045.02 | 76.367  | 18102  | 3 | 682.35  | -8.178  |
| P35580 MYH10_HUMAN Myosin-10      | 9  | Carbamidomethyl+C(1); Carbamidomethyl+C(13) | CMLQDREDQSILCTGESGAGK | 163  | 21 | 8  | 17.07 | b6*b6b11y2y5y8°y8y21                    | 2355.06 | 75.298  | 9392   | 2 | 1178.03 | 8.708   |
| P35580 MYH10_HUMAN Myosin-10      | 10 |                                             | MEIDLKDLAQIEAANK      | 1621 | 17 | 3  | 14.93 | b4b15y5                                 | 1930.97 | 57.300  | 7745   | 3 | 644.33  | -4.741  |
| P35580 MYH10_HUMAN Myosin-10      | 11 |                                             | KEEELQGALAR           | 1087 | 11 | 5  | 34.22 | b3°b3b6b10*b10                          | 1243.65 | 88.507  | 5137   | 2 | 622.33  | -8.932  |
| P35580 MYH10_HUMAN Myosin-10      | 12 |                                             | IGQLEEQLQEAK          | 1822 | 13 | 5  | 27.21 | b3b11*b11y8y12                          | 1514.77 | 80.129  | 4796   | 2 | 757.89  | 2.579   |
| P35580 MYH10_HUMAN Myosin-10      | 13 |                                             | LQQLFNHTMFILEQEEYQR   | 482  | 19 | 8  | 45.12 | b2b3*b3b8y8y9y11y12                     | 2467.24 | 103.567 | 3902   | 3 | 823.08  | 12.963  |
| P35580 MYH10_HUMAN Myosin-10      | 14 |                                             | VEGELEEMER            | 870  | 10 | 3  | 24.99 | b3y4y7                                  | 1220.54 | 30.655  | 3531   | 2 | 610.77  | -3.701  |
| P35580 MYH10_HUMAN Myosin-10      | 15 |                                             | YAEERDR               | 1466 | 7  | 4  | 35.31 | b6y3y4y7                                | 938.43  | 35.734  | 2241   | 2 | 469.72  | -5.789  |
| P35580 MYH10_HUMAN Myosin-10      | 16 |                                             | NSLQEQEQEEEEEAR       | 1345 | 14 | 4  | 23.11 | b4b5y5°y5                               | 1718.71 | 62.176  | 77984  | 2 | 859.86  | -22.159 |
| P35580 MYH10_HUMAN Myosin-10      | 17 |                                             | IVGLDQVTGMTETAFGSAYK  | 624  | 20 | 5  | 30.07 | y4y6°y6y8y15                            | 2088.07 | 79.544  | 54010  | 3 | 696.70  | 19.994  |
| P35580 MYH10_HUMAN Myosin-10      | 18 |                                             | MEEEILLLEDQNSK        | 982  | 14 | 8  | 39.26 | b10y5°y5y6y8°y8y11°y11                  | 1690.80 | 42.616  | 49888  | 3 | 564.27  | -14.078 |
| P35580 MYH10_HUMAN Myosin-10      | 19 |                                             | QLEEAEEEAATR          | 1884 | 11 | 12 | 49.13 | b3°b3*b3b4°b4b5°b5*b5y6°y6y9°y9         | 1304.61 | 42.661  | 43104  | 2 | 652.81  | 7.953   |
| P35580 MYH10_HUMAN Myosin-10      | 20 |                                             | FDQLLAEEK             | 1452 | 9  | 4  | 42.7  | b4y5y6y8                                | 1092.56 | 50.206  | 39417  | 2 | 546.78  | -1.564  |
| P35580 MYH10_HUMAN Myosin-10      | 21 |                                             | HADQYK                | 1863 | 6  | 1  | 12.93 | y5                                      | 761.36  | 85.754  | 19341  | 1 | 761.36  | -1.924  |
| P35580 MYH10_HUMAN Myosin-10      | 22 |                                             | NVHELEK               | 1525 | 7  | 5  | 38.32 | b4*b4y3y5°y5                            | 868.47  | 34.207  | 13796  | 2 | 434.74  | 19.889  |
| P35580 MYH10_HUMAN Myosin-10      | 23 |                                             | HQQLLEEK              | 881  | 8  | 4  | 38.8  | b3*b3b6b7                               | 1024.54 | 45.721  | 12675  | 2 | 512.77  | -6.196  |
| P35580 MYH10_HUMAN Myosin-10      | 24 |                                             | ALEEEETK              | 1181 | 7  | 3  | 35.31 | b4b5y4                                  | 819.41  | 43.752  | 9799   | 1 | 819.41  | 4.246   |
| P35580 MYH10_HUMAN Myosin-10      | 25 |                                             | ALAYDK                | 1411 | 6  | 2  | 12.93 | y4°y4                                   | 680.36  | 55.291  | 9625   | 1 | 680.36  | 0.897   |
| P35580 MYH10_HUMAN Myosin-10      | 26 |                                             | DLEAQIEAANK           | 1627 | 11 | 4  | 22.46 | b7b10y7°y7                              | 1201.62 | 30.610  | 9479   | 2 | 601.31  | 10.565  |
| P35580 MYH10_HUMAN Myosin-10      | 27 |                                             | LQLAK                 | 1082 | 5  | 1  | 12.45 | y3                                      | 572.38  | 43.577  | 9478   | 1 | 572.38  | -0.640  |
| P35580 MYH10_HUMAN Myosin-10      | 28 |                                             | SDLLLEGFNRYR          | 296  | 12 | 6  | 20.51 | b3°b3b10y11°y11*y11                     | 1440.71 | 98.821  | 8718   | 2 | 720.86  | -0.763  |

|                              |    |                      |                            |      |    |    |       |                                        |         |         |        |   |         |         |
|------------------------------|----|----------------------|----------------------------|------|----|----|-------|----------------------------------------|---------|---------|--------|---|---------|---------|
| P35580 MYH10_HUMAN Myosin-10 | 29 |                      | LLIK                       | 1592 | 4  | 1  | 11.97 | y3                                     | 486.37  | 54.302  | 8091   | 1 | 486.37  | 8.659   |
| P35580 MYH10_HUMAN Myosin-10 | 30 |                      | NMDPLNDNVATLLHQSSDR        | 594  | 19 | 5  | 30.58 | b5b12b13b16y12                         | 2140.01 | 65.760  | 6997   | 2 | 1070.51 | 1.255   |
| P35580 MYH10_HUMAN Myosin-10 | 31 |                      | NHEAQIQDMR                 | 1188 | 10 | 7  | 57.68 | b6*b6y3y4y4y6y9                        | 1241.57 | 31.576  | 6389   | 2 | 621.29  | -2.458  |
| P35580 MYH10_HUMAN Myosin-10 | 32 |                      | LQNELDNVSTLLEEAKE          | 1284 | 17 | 4  | 25.24 | b8y6y13y14                             | 1945.01 | 64.514  | 6121   | 3 | 649.01  | 16.695  |
| P35580 MYH10_HUMAN Myosin-10 | 33 |                      | HEMPPHIYAISESAYR           | 147  | 16 | 3  | 15.7  | b8y12y15                               | 1900.93 | 65.740  | 5918   | 3 | 634.31  | 12.779  |
| P35580 MYH10_HUMAN Myosin-10 | 34 |                      | LQQELDDLTVDLDHQR           | 1424 | 16 | 15 | 73.62 | b6°b6*b6b7°b7b9*b9b11y4°y4*y4y5y6*y6y7 | 1937.96 | 73.866  | 4946   | 3 | 646.66  | 1.260   |
| P35580 MYH10_HUMAN Myosin-10 | 35 |                      | QELEEILHDLESR              | 917  | 13 | 5  | 46.66 | y3°y3y5y10y12                          | 1610.80 | 55.675  | 4846   | 2 | 805.90  | -1.895  |
| P35580 MYH10_HUMAN Myosin-10 | 36 |                      | LDGETTDLQDQIAELQAQIDELK    | 1059 | 23 | 10 | 45.57 | b4°b4b6b8b17y5y10*y10y11y13            | 2586.26 | 109.330 | 4220   | 4 | 647.32  | -6.419  |
| P35580 MYH10_HUMAN Myosin-10 | 37 |                      | SAAQK                      | 1777 | 5  | 1  | 12.45 | y4                                     | 504.28  | 71.187  | 4142   | 1 | 504.28  | -0.484  |
| P35580 MYH10_HUMAN Myosin-10 | 38 |                      | EQADFAVEALAK               | 414  | 12 | 3  | 20.51 | b7b9y5                                 | 1291.63 | 45.623  | 4132   | 2 | 646.32  | -20.603 |
| P35580 MYH10_HUMAN Myosin-10 | 39 |                      | AVIYNPATQADWTAK            | 18   | 15 | 5  | 49.29 | b3b4b6b8b13                            | 1648.82 | 136.615 | 3995   | 1 | 1648.82 | -7.255  |
| P35580 MYH10_HUMAN Myosin-10 | 40 |                      | GDDETLHK                   | 1098 | 8  | 3  | 34.03 | b7y5y7                                 | 914.42  | 96.413  | 3288   | 1 | 914.42  | -2.737  |
| P35580 MYH10_HUMAN Myosin-10 | 41 |                      | QLHLEGASLELSDDDTESK        | 1944 | 19 | 4  | 13.7  | b12y3°y3y12                            | 2086.99 | 110.508 | 2747   | 2 | 1044.00 | 6.902   |
| P35580 MYH10_HUMAN Myosin-10 | 42 |                      | LNLSSR                     | 1331 | 6  | 1  | 12.93 | y5                                     | 689.39  | 26.820  | 2666   | 1 | 689.39  | -8.499  |
| P35580 MYH10_HUMAN Myosin-10 | 43 |                      | DELADEITNSASGK             | 1710 | 14 | 4  | 17.67 | b7°b7b13y12                            | 1449.66 | 86.516  | 2474   | 2 | 725.34  | -4.042  |
| P35580 MYH10_HUMAN Myosin-10 | 44 |                      | DAASLESQLODTQELLQEETR      | 1308 | 21 | 6  | 28.57 | b5y5*y5y8y12y13                        | 2404.18 | 88.447  | 1866   | 4 | 601.80  | 13.912  |
| P35580 MYH10_HUMAN Myosin-10 | 45 |                      | HWQWWR                     | 830  | 6  | 2  | 12.93 | y4*y4                                  | 998.46  | 34.921  | 1782   | 2 | 499.73  | -14.671 |
| P35580 MYH10_HUMAN Myosin-10 | 46 |                      | FLSNGYIPIPGQQDK            | 308  | 15 | 5  | 22.62 | b5°b5b6y4*y4                           | 1676.87 | 66.695  | 1705   | 3 | 559.63  | 5.460   |
| P35580 MYH10_HUMAN Myosin-10 | 47 |                      | VDDDLGTIESLEEAK            | 1379 | 15 | 3  | 16.6  | b8b14y10                               | 1633.78 | 77.255  | 1704   | 2 | 817.39  | -3.138  |
| P35580 MYH10_HUMAN Myosin-10 | 48 | Carbamidomethyl+C(4) | IAECSSQLAEIEEEK            | 1007 | 14 | 5  | 25.19 | b4b10y5y8*y8                           | 1622.69 | 44.173  | 1657   | 2 | 811.85  | -17.753 |
| P35580 MYH10_HUMAN Myosin-10 | 49 |                      | ELEEAR                     | 1659 | 6  | 2  | 25.39 | b3y4                                   | 746.37  | 111.437 | 1561   | 1 | 746.37  | 2.535   |
| P35580 MYH10_HUMAN Myosin-10 | 50 | Carbamidomethyl+C(7) | EDQSILCTGESGAGK            | 169  | 15 | 3  | 16.6  | b4y6y8                                 | 1551.71 | 114.461 | 1530   | 2 | 776.36  | 12.194  |
| P35580 MYH10_HUMAN Myosin-10 | 51 |                      | DVDRIVGLDQVTGMTETAFGSAYK   | 620  | 24 | 6  | 34.02 | y5y6°y6y8y10y12                        | 2573.23 | 121.425 | 154855 | 3 | 858.41  | -11.575 |
| P35580 MYH10_HUMAN Myosin-10 | 52 |                      | LEVNMQAMKAQFER             | 1564 | 14 | 5  | 29.15 | b3b8b13y13°y13                         | 1694.83 | 97.354  | 141344 | 2 | 847.92  | -5.186  |
| P35580 MYH10_HUMAN Myosin-10 | 53 |                      | LVQEQGSHSKFQKPR            | 552  | 15 | 4  | 24.68 | b3b8b12°b12                            | 1768.97 | 83.951  | 54668  | 3 | 590.33  | 14.837  |
| P35580 MYH10_HUMAN Myosin-10 | 54 |                      | EIFMQVEDERR                | 1852 | 11 | 5  | 32.69 | b3°b3b5y5y10                           | 1451.71 | 64.418  | 38810  | 2 | 726.36  | 7.652   |
| P35580 MYH10_HUMAN Myosin-10 | 55 | Carbamidomethyl+C(4) | ELACEVKVLQQVK              | 1234 | 13 | 5  | 26.43 | b3b4°b4b6°b6                           | 1543.83 | 92.542  | 26313  | 2 | 772.42  | -14.549 |
| P35580 MYH10_HUMAN Myosin-10 | 56 |                      | HATALEELSEQLEQAKR          | 1200 | 17 | 5  | 25.24 | b9b14b15*b15y12                        | 1953.01 | 80.131  | 19072  | 3 | 651.67  | 3.125   |
| P35580 MYH10_HUMAN Myosin-10 | 57 |                      | DLSEELALKTELEDTLDTTAAQQELR | 1142 | 27 | 10 | 59.27 | b10°b10b11y5°y5*y5y6*y6y7y8            | 3061.46 | 118.251 | 18387  | 3 | 1021.16 | -14.673 |

|                              |    |                       |                          |      |    |    |       |                               |         |         |       |   |         |         |
|------------------------------|----|-----------------------|--------------------------|------|----|----|-------|-------------------------------|---------|---------|-------|---|---------|---------|
| P35580 MYH10_HUMAN Myosin-10 | 58 |                       | KVDDDLGTIESLEEAK         | 1378 | 16 | 5  | 35.09 | b5b6y7°y7y8                   | 1761.85 | 49.785  | 18066 | 3 | 587.96  | -12.125 |
| P35580 MYH10_HUMAN Myosin-10 | 59 |                       | KALEEETK                 | 1180 | 8  | 5  | 60.7  | b5b6y4y5y7                    | 947.49  | 40.572  | 17204 | 2 | 474.25  | -10.307 |
| P35580 MYH10_HUMAN Myosin-10 | 60 |                       | DDVGKNVHELEK             | 1520 | 12 | 7  | 53.17 | b3°b3b6°b6b9b11°b11           | 1382.69 | 40.562  | 17084 | 2 | 691.85  | -3.620  |
| P35580 MYH10_HUMAN Myosin-10 | 61 |                       | QLRADMEDLMSSK            | 1507 | 13 | 4  | 23.72 | b9b10y10°y10                  | 1523.74 | 41.861  | 13168 | 2 | 762.37  | 11.376  |
| P35580 MYH10_HUMAN Myosin-10 | 62 |                       | NHEAQIQDMRQR             | 1188 | 12 | 7  | 55.53 | b6b11°b11y5y8y9y10            | 1525.73 | 68.083  | 11461 | 2 | 763.37  | -1.200  |
| P35580 MYH10_HUMAN Myosin-10 | 63 |                       | EEELQGALARGDDETLHK       | 1088 | 18 | 3  | 21.67 | b13y9y10                      | 2010.99 | 61.349  | 9890  | 3 | 671.00  | 10.684  |
| P35580 MYH10_HUMAN Myosin-10 | 64 |                       | QRHATALEELSEQLQAK        | 1198 | 18 | 6  | 14.27 | b6°b6°b6b10°b10y14            | 2081.06 | 71.862  | 9677  | 3 | 694.36  | -2.346  |
| P35580 MYH10_HUMAN Myosin-10 | 65 |                       | NKQEVMSIDLEER            | 1029 | 13 | 4  | 23.72 | b6y5y6°y6                     | 1590.79 | 63.464  | 8182  | 2 | 795.90  | 5.218   |
| P35580 MYH10_HUMAN Myosin-10 | 66 |                       | LQAQMKDYQR               | 1649 | 10 | 3  | 24.99 | b9y4y7                        | 1280.66 | 71.950  | 7509  | 2 | 640.83  | 14.584  |
| P35580 MYH10_HUMAN Myosin-10 | 67 |                       | NRLQQLDDLTVDLDHQR        | 1422 | 18 | 5  | 28.14 | b9b11y4y8y11                  | 2208.08 | 97.147  | 6686  | 3 | 736.70  | -8.735  |
| P35580 MYH10_HUMAN Myosin-10 | 68 |                       | KLDGETTDLQDQIAELQAQIDELK | 1058 | 24 | 3  | 18.16 | y4y7y11                       | 2714.37 | 98.103  | 6352  | 3 | 905.46  | -0.090  |
| P35580 MYH10_HUMAN Myosin-10 | 69 |                       | VEGELEEMERK              | 870  | 11 | 4  | 22.46 | b3y5°y5y9                     | 1348.65 | 80.196  | 5761  | 2 | 674.83  | 9.776   |
| P35580 MYH10_HUMAN Myosin-10 | 70 |                       | MAQRTGLEDPER             | 0    | 12 | 3  | 20.51 | b7y6y8                        | 1402.69 | 65.692  | 5718  | 3 | 468.23  | 9.051   |
| P35580 MYH10_HUMAN Myosin-10 | 71 |                       | LEEKALAYDK               | 1407 | 10 | 4  | 26.75 | b3°b3y3y4                     | 1179.63 | 47.866  | 5600  | 2 | 590.32  | 6.726   |
| P35580 MYH10_HUMAN Myosin-10 | 72 |                       | RGGPISFSSSR              | 1929 | 11 | 4  | 22.46 | b8°b8y4y8                     | 1150.60 | 107.272 | 5517  | 2 | 575.81  | 5.835   |
| P35580 MYH10_HUMAN Myosin-10 | 73 |                       | KHQQLLEEK                | 880  | 9  | 4  | 28.49 | b3°b3y3y8                     | 1152.63 | 55.629  | 4627  | 2 | 576.82  | -9.426  |
| P35580 MYH10_HUMAN Myosin-10 | 74 |                       | KQELEEILHDLESR           | 916  | 14 | 6  | 39.26 | b3°b3y5y7y8y10                | 1738.91 | 78.337  | 4219  | 3 | 580.31  | 7.441   |
| P35580 MYH10_HUMAN Myosin-10 | 75 |                       | AQRTGLEDPER              | 1    | 11 | 8  | 32.69 | b4°b4b10°b10°b10y6y8°y8       | 1271.62 | 42.601  | 3908  | 2 | 636.32  | -7.680  |
| P35580 MYH10_HUMAN Myosin-10 | 76 |                       | ALEEETKNHEAQIQDMR        | 1181 | 17 | 11 | 49.38 | b4°b4b5b9y3°y3y5°y5y10y11°y11 | 2041.98 | 73.857  | 3159  | 2 | 1021.49 | 9.625   |
| P35580 MYH10_HUMAN Myosin-10 | 77 | Carbamidomethyl+C(17) | HEMPPHIYAISESAYRCMLQDR   | 147  | 22 | 9  | 52.52 | b7b8b10b11°b11y4°y4y10y11     | 2704.27 | 124.070 | 3069  | 3 | 902.09  | 9.570   |
| P35580 MYH10_HUMAN Myosin-10 | 78 |                       | DELADEITNSASGKSALLDEK    | 1710 | 21 | 6  | 28.95 | b3°b3b5°b5b11b13              | 2206.04 | 63.388  | 2837  | 3 | 736.02  | -14.608 |
| P35580 MYH10_HUMAN Myosin-10 | 79 | Carbamidomethyl+C(9)  | LMEDRIAECSSQLAEEEEK      | 1002 | 19 | 4  | 18.69 | b6b14y6y11                    | 2267.03 | 77.917  | 2468  | 3 | 756.35  | 7.108   |
| P35580 MYH10_HUMAN Myosin-10 | 80 |                       | ERNTDQASMPENTVAQK        | 363  | 17 | 3  | 14.93 | b6y10y12                      | 1918.91 | 104.705 | 2181  | 2 | 959.96  | 11.069  |
| P35580 MYH10_HUMAN Myosin-10 | 81 |                       | ALEEALAKEEFER            | 1490 | 14 | 7  | 52.81 | b5b8y4°y4y6y8y10              | 1663.83 | 80.144  | 1919  | 3 | 555.28  | 6.530   |
| P35580 MYH10_HUMAN Myosin-10 | 82 |                       | NKQGLETDNK               | 1224 | 10 | 8  | 56.88 | b4b6b8°b8y3°y3*y3y5           | 1146.56 | 26.449  | 1749  | 2 | 573.78  | -14.799 |
| P35580 MYH10_HUMAN Myosin-10 | 83 |                       | LQRELDDATEANEGLSR        | 1902 | 17 | 9  | 41.4  | b7°b7b12b13y6y7°y7y13°y13     | 1916.92 | 95.956  | 1670  | 3 | 639.65  | -4.267  |
| P35580 MYH10_HUMAN Myosin-10 | 84 |                       | KEEELQGALAR              | 1087 | 11 | 5  | 25.47 | b6°b6b7°b7y3                  | 1243.65 | 34.935  | 1645  | 2 | 622.33  | -14.723 |
| P35580 MYH10_HUMAN Myosin-10 | 85 |                       | HAEQERDELADEITNSASGK     | 1704 | 20 | 6  | 35.39 | b4b6y3y7y11y13                | 2200.02 | 44.154  | 1603  | 2 | 1100.51 | 4.106   |
| P35580 MYH10_HUMAN Myosin-10 | 86 | Carbamidomethyl+C(12) | QGLETDNKELACEVK          | 1226 | 15 | 7  | 34.02 | b5°b5b6b8y5°y5y11             | 1733.83 | 119.125 | 1535  | 2 | 867.42  | -2.112  |

|                                                        |    |                                                                                                    |                                      |      |    |    |        |                                                                                                                   |         |         |        |   |         |         |
|--------------------------------------------------------|----|----------------------------------------------------------------------------------------------------|--------------------------------------|------|----|----|--------|-------------------------------------------------------------------------------------------------------------------|---------|---------|--------|---|---------|---------|
| P35580 MYH10_HUMAN Myosin-10                           | 87 | Phosphoryl STY(11)                                                                                 | NILAEQLQAETELFAEAEEMR                | 889  | 21 | 3  | 12.79  | b11y10y13                                                                                                         | 2515.15 | 91.820  | 134532 | 3 | 839.05  | 6.698   |
| P35580 MYH10_HUMAN Myosin-10                           | 88 | Phosphoryl STY(13)                                                                                 | AVIYNPATQADWTAK                      | 18   | 15 | 3  | 16.6   | b5b12y4                                                                                                           | 1728.77 | 42.590  | 4679   | 2 | 864.89  | -8.826  |
| P35580 MYH10_HUMAN Myosin-10                           | 89 | Phosphoryl STY(8)                                                                                  | LQAQMKDYQR                           | 1649 | 10 | 9  | 50.86  | b3b4b7 <sup>b</sup> 7y4_H3PO4<br>y4 <sup>y</sup> 4 <sup>y</sup> 4y5_H3PO4 y5 <sup>y</sup> 5                       | 1360.59 | 23.875  | 3687   | 3 | 454.20  | -3.320  |
| P35580 MYH10_HUMAN Myosin-10                           | 90 | Phosphoryl STY(10)                                                                                 | VDDDLGTIESLEEAKK                     | 1379 | 16 | 7  | 28.56  | b8 <sup>b</sup> 8b9 <sup>b</sup> 9y8 <sup>y</sup> 8y11                                                            | 1841.81 | 49.841  | 3591   | 2 | 921.41  | -13.984 |
| P35580 MYH10_HUMAN Myosin-10                           | 91 | Phosphoryl STY(10)                                                                                 | LQNELDNVSTLLEAEKK                    | 1284 | 18 | 10 | 38.37  | b7 <sup>b</sup> 7b9 <sup>b</sup> b9b15_H3PO4<br>b15y9y12_H3PO4<br>y12y13 <sup>y</sup> 13 <sup>y</sup> 13          | 2153.00 | 108.136 | 3032   | 2 | 1077.00 | -13.267 |
| P35580 MYH10_HUMAN Myosin-10                           | 92 | Phosphoryl STY(11)                                                                                 | IVGLDQVTGMTETAFGSAYK                 | 624  | 20 | 4  | 21.34  | b10 <sup>b</sup> 10b11y6                                                                                          | 2168.02 | 98.827  | 1803   | 2 | 1084.51 | 14.752  |
| P35580 MYH10_HUMAN Myosin-10                           | 93 | Oxidation+M(2)                                                                                     | NMDPLNDNVATLLHQSSDR                  | 594  | 19 | 8  | 49.44  | b11b12b13y3 <sup>y</sup> 3y4y13 <sup>y</sup> 13                                                                   | 2156.00 | 58.621  | 64015  | 3 | 719.34  | -1.132  |
| P35580 MYH10_HUMAN Myosin-10                           | 94 | Oxidation+M(10)                                                                                    | IVGLDQVTGMTETAFGSAYK                 | 624  | 20 | 3  | 13.21  | b14y7y16                                                                                                          | 2104.03 | 81.462  | 13076  | 3 | 702.01  | 0.116   |
| P35580 MYH10_HUMAN Myosin-10                           | 95 | Oxidation+M(15)                                                                                    | IAQLEEELEEEQSNMELLNDR                | 1737 | 21 | 5  | 19.84  | b9b11b13 <sup>b</sup> b13y7                                                                                       | 2548.17 | 92.502  | 2194   | 2 | 1274.59 | 0.671   |
| P35580 MYH10_HUMAN Myosin-10                           | 96 | Oxidation+M(0)                                                                                     | LQLLFNHTMFILEQEEYQR                  | 482  | 19 | 7  | 36.81  | b3b8b11y4y9y10 <sup>y</sup> 10                                                                                    | 2483.17 | 136.456 | 1816   | 2 | 1242.09 | -12.585 |
| P35580 MYH10_HUMAN Myosin-10                           | 97 | Oxidation+M(4)                                                                                     | EIFMQVEDER                           | 1852 | 10 | 3  | 24.99  | b4y3y8                                                                                                            | 1311.60 | 34.942  | 1599   | 2 | 656.31  | 11.727  |
| P35580 MYH10_HUMAN Myosin-10                           | 98 | Carbamidomethyl+C(4)                                                                               | ADFCIIHYAGK                          | 572  | 11 | 2  | 17.79  | y6y8                                                                                                              | 1276.60 | 58.819  | 1554   | 3 | 426.20  | -10.614 |
| P09486 SPRC_HUMAN SPARC                                | 1  | Carbamidomethyl+C(5)                                                                               | YIPPLDSELTEFPLR                      | 150  | 16 | 7  | 32.44  | b8b9b12 <sup>b</sup> b12y9y14y16                                                                                  | 1949.98 | 88.311  | 21654  | 2 | 975.50  | 8.389   |
| P09486 SPRC_HUMAN SPARC                                | 2  | Carbamidomethyl+C(2);<br>Carbamidomethyl+C(12);<br>Carbamidomethyl+C(14);<br>Carbamidomethyl+C(20) | VCELDENNTPMCVCQDPTSCPAPI<br>GEFEK    | 81   | 29 | 6  | 47.99  | b2y7y8y9y12y13                                                                                                    | 3397.41 | 68.714  | 8721   | 3 | 1133.14 | -1.078  |
| P09486 SPRC_HUMAN SPARC                                | 3  |                                                                                                    | DEDNNLLTEK                           | 181  | 10 | 4  | 26.75  | b7b8y9y10                                                                                                         | 1190.54 | 29.441  | 6156   | 2 | 595.78  | -7.793  |
| P09486 SPRC_HUMAN SPARC                                | 4  |                                                                                                    | QKDIDKDLVI                           | 293  | 10 | 6  | 13.33  | b2b4 <sup>b</sup> b4b5 <sup>b</sup> b5 <sup>y</sup> 5                                                             | 1186.68 | 89.166  | 5223   | 2 | 593.84  | 7.304   |
| P09486 SPRC_HUMAN SPARC                                | 5  | Carbamidomethyl+C(10)                                                                              | YIALDEWAGCFGIK                       | 279  | 14 | 8  | 70.03  | b4b8 <sup>b</sup> b8y6y7y8y9y10                                                                                   | 1642.81 | 44.131  | 39081  | 2 | 821.91  | 9.809   |
| P09486 SPRC_HUMAN SPARC                                | 6  | Carbamidomethyl+C(10)                                                                              | YIALDEWAGCFGIKQK                     | 279  | 16 | 5  | 32.44  | b6b7b11y11y13                                                                                                     | 1898.97 | 53.205  | 7201   | 3 | 633.66  | 13.371  |
| P09486 SPRC_HUMAN SPARC                                | 7  | Carbamidomethyl+C(12)                                                                              | GHKLHLDYIGPCK                        | 137  | 13 | 5  | 43.65  | y4y5y8y9 <sup>y</sup> 9                                                                                           | 1537.80 | 75.337  | 3182   | 2 | 769.40  | 3.652   |
| P09486 SPRC_HUMAN SPARC                                | 8  |                                                                                                    | EDNNLLTEK                            | 182  | 9  | 1  | 7.86   | b8                                                                                                                | 1075.53 | 29.377  | 4739   | 2 | 538.27  | 4.880   |
| P10236 UL52_HHV11 DNA helicase/primase complex protein | 1  |                                                                                                    | ALYQASGGLNGDSFR                      | 75   | 15 | 18 | 101.06 | b6 <sup>b</sup> b6b7 <sup>b</sup> b7b9y1y2y3y4 <sup>y</sup> 4y7<br>y9y10 <sup>y</sup> 10y11 <sup>y</sup> 11y13y15 | 1555.77 | 73.846  | 59257  | 2 | 778.39  | 11.299  |
| P10236 UL52_HHV11 DNA helicase/primase complex protein | 2  | Carbamidomethyl+C(24)                                                                              | GWPAFAPASPGEDTAGTPPPQT<br>CGIVK      | 474  | 28 | 10 | 39.95  | b7b9y5y6y7 <sup>y</sup> 7 <sup>y</sup> 7y13y17y28                                                                 | 2766.31 | 62.845  | 44372  | 3 | 922.77  | -3.354  |
| P10236 UL52_HHV11 DNA helicase/primase complex protein | 3  |                                                                                                    | DAAAAQYDQGASLR                       | 175  | 14 | 7  | 48.16  | b6 <sup>b</sup> b6b9b13y4y11y13                                                                                   | 1436.68 | 92.534  | 10571  | 2 | 718.85  | 5.098   |
| P10236 UL52_HHV11 DNA helicase/primase complex protein | 4  |                                                                                                    | AQGPVMPGGDLDAGGQMYVNR                | 591  | 21 | 15 | 91.73  | b3b5b7 <sup>b</sup> b7b10b11 <sup>b</sup> b11b13 <sup>b</sup> b1<br>3b16y5y6y7y12y21                              | 2115.01 | 108.143 | 10097  | 3 | 705.67  | -0.577  |
| P10236 UL52_HHV11 DNA helicase/primase complex protein | 5  | Carbamidomethyl+C(29)                                                                              | AVTTHDPNPAASTEQPSPLGREAV<br>EQFFCHVR | 373  | 32 | 3  | 10.89  | b10y12y18                                                                                                         | 3548.66 | 69.001  | 4185   | 4 | 887.92  | -11.008 |
| P10236 UL52_HHV11 DNA helicase/primase complex protein | 6  |                                                                                                    | YNVQPDAGGTVEGFASELLGR                | 919  | 21 | 5  | 22.85  | b17 <sup>b</sup> 17y10y16y17                                                                                      | 2180.04 | 105.002 | 2123   | 3 | 727.35  | -9.743  |
| P10236 UL52_HHV11 DNA helicase/primase complex protein | 7  |                                                                                                    | DFVEAIGSYVK                          | 795  | 11 | 5  | 34.12  | b3b6 <sup>b</sup> b6b7y5                                                                                          | 1227.61 | 105.664 | 1615   | 1 | 1227.61 | -13.225 |
| P10236 UL52_HHV11 DNA helicase/primase complex protein | 8  | Carbamidomethyl+C(4)                                                                               | IVACIETHFPEHAGEYQAVSVR               | 940  | 22 | 6  | 23.06  | b12 <sup>b</sup> 12b14b18y11y13                                                                                   | 2513.23 | 71.046  | 35066  | 3 | 838.41  | 2.040   |

|                                                        |    |                                                                  |                        |      |    |    |       |                                 |         |         |        |   |         |         |
|--------------------------------------------------------|----|------------------------------------------------------------------|------------------------|------|----|----|-------|---------------------------------|---------|---------|--------|---|---------|---------|
| P10236 UL52_HHV11 DNA helicase/primase complex protein | 9  | Carbamidomethyl+C(13)                                            | EFITYYLAHFECFSPPR      | 349  | 18 | 4  | 14.27 | b8°b8y8y12                      | 2290.12 | 100.557 | 22091  | 3 | 764.05  | 10.234  |
| P10236 UL52_HHV11 DNA helicase/primase complex protein | 10 |                                                                  | AVTTHDPNPAASTEQPSPLGR  | 373  | 21 | 4  | 19.84 | b11b13b15y5                     | 2146.04 | 70.957  | 17066  | 3 | 716.02  | -5.916  |
| P10236 UL52_HHV11 DNA helicase/primase complex protein | 11 | Carbamidomethyl+C(2); Carbamidomethyl+C(6); Carbamidomethyl+C(9) | LCVSLCQQCFAAK          | 1014 | 13 | 5  | 27.21 | b4°b4b6y5y8                     | 1584.74 | 79.502  | 8399   | 2 | 792.87  | 5.469   |
| P10236 UL52_HHV11 DNA helicase/primase complex protein | 12 |                                                                  | GVAR                   | 781  | 4  | 1  | 11.97 | y3                              | 402.24  | 97.343  | 5124   | 1 | 402.24  | -4.856  |
| P10236 UL52_HHV11 DNA helicase/primase complex protein | 13 | Carbamidomethyl+C(2); Carbamidomethyl+C(3)                       | FCCTSQYAR              | 299  | 9  | 5  | 36.27 | y5y7°y7y8°y8                    | 1192.47 | 42.602  | 4439   | 2 | 596.74  | -14.741 |
| P10236 UL52_HHV11 DNA helicase/primase complex protein | 14 |                                                                  | LAEAVVSAEAAAHPDHGALGR  | 563  | 21 | 5  | 35.98 | b5y7y9y10y11                    | 2042.08 | 62.758  | 3957   | 3 | 681.36  | 18.711  |
| P10236 UL52_HHV11 DNA helicase/primase complex protein | 15 | Carbamidomethyl+C(8)                                             | IAPDGPACGR             | 829  | 10 | 5  | 36.65 | b4b9°b9y6y9                     | 1013.47 | 49.751  | 3300   | 2 | 507.24  | -14.815 |
| P10236 UL52_HHV11 DNA helicase/primase complex protein | 16 |                                                                  | NALEHFGR               | 901  | 8  | 3  | 31.02 | b3y6y7                          | 943.47  | 34.967  | 2900   | 2 | 472.24  | -7.957  |
| P10236 UL52_HHV11 DNA helicase/primase complex protein | 17 |                                                                  | LGGAGATYDLQAIK         | 255  | 14 | 4  | 17.67 | b6b11°b11y7                     | 1377.72 | 52.245  | 2459   | 2 | 689.36  | -13.468 |
| P10236 UL52_HHV11 DNA helicase/primase complex protein | 18 |                                                                  | VLHSLGGDYVSFFER        | 882  | 15 | 3  | 16.6  | b10y8y10                        | 1725.82 | 53.775  | 2408   | 2 | 863.42  | -20.653 |
| P10236 UL52_HHV11 DNA helicase/primase complex protein | 19 |                                                                  | FGPDEK                 | 234  | 6  | 2  | 25.39 | b3y4                            | 692.32  | 103.550 | 2265   | 1 | 692.32  | -9.257  |
| P10236 UL52_HHV11 DNA helicase/primase complex protein | 20 | Carbamidomethyl+C(2)                                             | VCMPVPAPYVVHGSLTMR     | 763  | 18 | 3  | 21.43 | b6b10b14                        | 2013.97 | 77.389  | 1952   | 2 | 1007.49 | -18.547 |
| P10236 UL52_HHV11 DNA helicase/primase complex protein | 21 |                                                                  | ADGPTEQDR              | 61   | 9  | 6  | 42.7  | b4b5°b5b7y6°y6                  | 988.45  | 93.556  | 1800   | 1 | 988.45  | 15.561  |
| P10236 UL52_HHV11 DNA helicase/primase complex protein | 22 |                                                                  | DVPAFVAAHADPR          | 851  | 13 | 4  | 18.95 | b8y4°y4y9                       | 1365.67 | 54.248  | 1562   | 2 | 683.34  | -14.212 |
| P10236 UL52_HHV11 DNA helicase/primase complex protein | 23 |                                                                  | ISMVPTGQAFALAALWDDWAR  | 537  | 20 | 4  | 38.82 | b3b4b6b7                        | 2206.05 | 118.082 | 1527   | 2 | 1103.53 | -11.067 |
| P10236 UL52_HHV11 DNA helicase/primase complex protein | 24 |                                                                  | GLTTLVYVHHEVRVLAAYR    | 200  | 18 | 4  | 21.43 | b3°b3b6b11                      | 2098.14 | 118.073 | 163768 | 3 | 700.05  | -6.167  |
| P10236 UL52_HHV11 DNA helicase/primase complex protein | 25 |                                                                  | NALEHFGR               | 901  | 9  | 5  | 54.74 | b3b4b6b7°b7                     | 1099.57 | 37.475  | 136377 | 2 | 550.29  | -4.552  |
| P10236 UL52_HHV11 DNA helicase/primase complex protein | 26 | Carbamidomethyl+C(9)                                             | GRTRPMFVCR             | 107  | 10 | 4  | 37.44 | b4b5b9y3                        | 1279.64 | 69.733  | 75571  | 3 | 427.22  | -9.253  |
| P10236 UL52_HHV11 DNA helicase/primase complex protein | 27 |                                                                  | FEESRALYQASGGLNGDSFR   | 70   | 20 | 12 | 55.32 | b5°b5b6°b6b9°b9b10b13y6y8°y8y10 | 2204.04 | 81.262  | 52690  | 3 | 735.35  | 2.437   |
| P10236 UL52_HHV11 DNA helicase/primase complex protein | 28 | Carbamidomethyl+C(7)                                             | TRPMFVCRFER            | 109  | 11 | 4  | 22.46 | b6b8°b8y3                       | 1498.73 | 56.325  | 4346   | 3 | 500.25  | -4.072  |
| P10236 UL52_HHV11 DNA helicase/primase complex protein | 29 |                                                                  | RAYYGSAQSPFWFLSK       | 218  | 16 | 6  | 36.64 | b6°b6b8b11b13°b13               | 1907.93 | 76.248  | 3627   | 3 | 636.65  | -8.957  |
| P10236 UL52_HHV11 DNA helicase/primase complex protein | 30 |                                                                  | MGQEDGNRGER            | 0    | 11 | 4  | 22.46 | b8y3y7°y7                       | 1248.55 | 81.289  | 2623   | 1 | 1248.55 | 8.115   |
| P10236 UL52_HHV11 DNA helicase/primase complex protein | 31 |                                                                  | AYYGSAQSPFWFLSKFGPDEK  | 219  | 21 | 4  | 33.58 | b11b12b13°b13                   | 2425.14 | 76.184  | 1530   | 2 | 1213.08 | -2.517  |
| P10236 UL52_HHV11 DNA helicase/primase complex protein | 32 | Carbamidomethyl+C(7); Carbamidomethyl+C(9); Phosphoryl STY(2)    | ETDSPVCSTDK            | 747  | 12 | 4  | 33.73 | y9_H3PO4 y8y9°y9y10_H3PO4 y10   | 1478.53 | 34.889  | 362211 | 2 | 739.77  | 11.559  |
| P10236 UL52_HHV11 DNA helicase/primase complex protein | 33 | Phosphoryl STY()                                                 | AVTTHDPNPAASTEQPSPLGR  | 373  | 21 | 9  | 27.14 | b6°b6b7b11°b11°b11y10°y10y12    | 2226.02 | 81.254  | 9668   | 3 | 742.68  | 3.619   |
| P10236 UL52_HHV11 DNA helicase/primase complex protein | 34 | Carbamidomethyl+C(14); Phosphoryl STY(8)                         | TYAPGALTPAPAYCGAVDSATK | 437  | 22 | 3  | 12.43 | b6y11y13                        | 2262.02 | 56.355  | 6830   | 2 | 1131.51 | 4.425   |

|                                                          |    |                                         |                              |     |    |    |       |                                            |         |         |        |   |         |         |
|----------------------------------------------------------|----|-----------------------------------------|------------------------------|-----|----|----|-------|--------------------------------------------|---------|---------|--------|---|---------|---------|
| [P10236]UL52_HHV11 DNA helicase/primase complex protein  | 35 | Phosphoryl STY(7)                       | LGGAGATYDLQAIK               | 255 | 14 | 4  | 25.19 | b3b5y8y13                                  | 1457.68 | 136.469 | 6566   | 1 | 1457.68 | -11.138 |
| [P10236]UL52_HHV11 DNA helicase/primase complex protein  | 36 | Carbamidomethyl+C(17);Phosphoryl STY(9) | VSDREFITYIYLAHFECFSPPR       | 345 | 22 | 3  | 12.43 | b7y6y12                                    | 2827.25 | 77.371  | 2967   | 3 | 943.09  | -13.557 |
| [P10236]UL52_HHV11 DNA helicase/primase complex protein  | 37 | Carbamidomethyl+C(2);Oxidation+M(17)    | VCMPVPAPYVVHGSLTMR           | 763 | 18 | 3  | 14.27 | b11y6y9                                    | 2029.98 | 61.266  | 16440  | 2 | 1015.49 | -10.944 |
| [P10236]UL52_HHV11 DNA helicase/primase complex protein  | 38 | Carbamidomethyl+C(7);Oxidation+M(4)     | TRPMFVCR                     | 109 | 8  | 6  | 60.7  | b4*b4b5y4y6y7                              | 1082.52 | 80.128  | 6082   | 1 | 1082.52 | -5.864  |
| [P10236]UL52_HHV11 DNA helicase/primase complex protein  | 39 | Oxidation+M(0)                          | AQGPVMPGGDLDAGGQMYVNR        | 591 | 21 | 12 | 50.22 | b4*b4b8b12*b12b17y7*y7y10y12*y12y15        | 2131.03 | 93.113  | 2027   | 3 | 711.02  | 11.915  |
| [P10236]UL52_HHV11 DNA helicase/primase complex protein  | 40 |                                         | YNVQPDAGGTVEGFASEL           | 919 | 18 | 0  | 7.68  |                                            | 1853.84 | 105.053 | 3312   | 2 | 927.43  | -6.519  |
| [P48741]HSP77_HUMAN Putative heat shock 70 kDa protein 7 | 1  |                                         | FADTTVQSDMK                  | 79  | 11 | 10 | 59.82 | b3b8y1y2y4y5*y5y6y10y11                    | 1242.55 | 68.085  | 197798 | 3 | 414.86  | -12.870 |
| [P48741]HSP77_HUMAN Putative heat shock 70 kDa protein 7 | 2  |                                         | VEILANDQGNR                  | 27  | 11 | 8  | 66.81 | b3y4y6*y6y7y8y9y11                         | 1228.63 | 36.321  | 66077  | 2 | 614.82  | -0.894  |
| [P48741]HSP77_HUMAN Putative heat shock 70 kDa protein 7 | 3  |                                         | TTPSYVAFTDTER                | 38  | 13 | 12 | 71.77 | b1*b1b5*b5b9y1y3y5y6y9y11y13               | 1487.71 | 55.116  | 52107  | 2 | 744.36  | 5.580   |
| [P48741]HSP77_HUMAN Putative heat shock 70 kDa protein 7 | 4  |                                         | SQAALNPHNTVFDK               | 58  | 15 | 10 | 54.28 | b6*b6b10b12*b12b13y2y5y9y13                | 1612.81 | 59.460  | 39723  | 2 | 806.91  | 4.314   |
| [P48741]HSP77_HUMAN Putative heat shock 70 kDa protein 7 | 5  | Carbamidomethyl+C(5)                    | FEELCSDLFR                   | 303 | 10 | 3  | 31.98 | y4y5y8                                     | 1315.58 | 62.891  | 2488   | 3 | 439.20  | -11.413 |
| [P48741]HSP77_HUMAN Putative heat shock 70 kDa protein 7 | 6  |                                         | ATAGDTHLGGEDFDNR             | 222 | 16 | 4  | 15.7  | b5*b5y6y13                                 | 1675.74 | 39.397  | 1761   | 2 | 838.37  | 6.483   |
| [P48741]HSP77_HUMAN Putative heat shock 70 kDa protein 7 | 7  |                                         | TPSSSTQATLEIDSLFEGVDFYK      | 274 | 23 | 14 | 57.98 | b4b5b6*b6b11*b11*b11b12*b12b14*b14b19y4*y4 | 2535.26 | 121.418 | 445922 | 3 | 845.76  | 16.853  |
| [P48741]HSP77_HUMAN Putative heat shock 70 kDa protein 7 | 8  |                                         | TFYPEEISSMVLK                | 114 | 14 | 5  | 25.45 | b4b5*b5b7*b7                               | 1630.84 | 36.637  | 3544   | 3 | 544.28  | 20.135  |
| [P48741]HSP77_HUMAN Putative heat shock 70 kDa protein 7 | 9  |                                         | HAVITVPTYFSNSQR              | 142 | 15 | 6  | 29.51 | b13b14y3*y3y8*y8                           | 1719.86 | 75.324  | 3394   | 3 | 573.96  | -10.434 |
| [P48741]HSP77_HUMAN Putative heat shock 70 kDa protein 7 | 10 |                                         | LVNHFMEEFR                   | 238 | 10 | 3  | 26.75 | b3b4y6                                     | 1321.64 | 83.173  | 1562   | 2 | 661.32  | 2.586   |
| [P48741]HSP77_HUMAN Putative heat shock 70 kDa protein 7 | 11 | Phosphoryl STY(5)                       | HAVITVPTYFSNSQR              | 142 | 15 | 4  | 16.6  | b4b11y12*y12                               | 1799.86 | 66.642  | 18737  | 2 | 900.43  | 10.784  |
| [P48741]HSP77_HUMAN Putative heat shock 70 kDa protein 7 | 12 | Phosphoryl STY(0)                       | MKETAEAYLGQPVK               | 128 | 14 | 6  | 30.63 | b7b10_H3PO4 b10y8y9*y9*y9                  | 1644.78 | 34.923  | 9131   | 3 | 548.93  | 12.691  |
| [P48741]HSP77_HUMAN Putative heat shock 70 kDa protein 7 | 13 | Carbamidomethyl+C(18);Phosphoryl STY(0) | QAPRELAVGIDLGTTYSCVGVFQ QGR  | 1   | 26 | 11 | 29.6  | b3b5*b5b13y4*y4y9*y9y10*y10*y10            | 2902.38 | 41.859  | 4800   | 6 | 484.57  | 0.505   |
| [P62258]1433E_HUMAN 14-3-3 protein epsilon               | 1  |                                         | NLLSVAYK                     | 42  | 8  | 9  | 46.48 | b1b2b4*b4y1y2y3y5y6                        | 907.52  | 58.041  | 98856  | 2 | 454.26  | -5.986  |
| [P62258]1433E_HUMAN 14-3-3 protein epsilon               | 2  |                                         | AAFDDAIAELDTLSEESYKDSLIMQLLR | 196 | 29 | 14 | 54.5  | b2b3b6b7*b7b8y1y2y5y6y9y19y22y29           | 3258.62 | 136.167 | 42823  | 3 | 1086.88 | 2.547   |
| [P62258]1433E_HUMAN 14-3-3 protein epsilon               | 3  |                                         | DSTLIMQLLR                   | 215 | 10 | 5  | 31.98 | y2y4y5y7y10                                | 1189.67 | 92.652  | 22909  | 2 | 595.34  | 3.899   |
| [P62258]1433E_HUMAN 14-3-3 protein epsilon               | 4  |                                         | AAFDDAIAELDTLSEESYK          | 196 | 19 | 5  | 29.59 | b1y4y7y13y14                               | 2087.97 | 77.443  | 3310   | 3 | 696.66  | 0.234   |
| [P62258]1433E_HUMAN 14-3-3 protein epsilon               | 5  |                                         | EDLVYQAK                     | 4   | 8  | 5  | 38.8  | b3*b3b4b6*b6                               | 965.49  | 58.043  | 42678  | 1 | 965.49  | -0.253  |
| [P62258]1433E_HUMAN 14-3-3 protein epsilon               | 6  |                                         | HLIPAANTGESK                 | 106 | 12 | 5  | 34.72 | b10*b10y5y8y10                             | 1237.65 | 73.032  | 24337  | 2 | 619.33  | 0.888   |
| [P62258]1433E_HUMAN 14-3-3 protein epsilon               | 7  |                                         | VFYYK                        | 118 | 5  | 1  | 12.45 | y3                                         | 719.37  | 55.784  | 9572   | 1 | 719.37  | -7.466  |
| [P62258]1433E_HUMAN 14-3-3 protein epsilon               | 8  |                                         | VAGMDVELTVEER                | 29  | 13 | 3  | 26.43 | b7b8b12                                    | 1447.71 | 84.807  | 1723   | 3 | 483.24  | 0.337   |
| [P62258]1433E_HUMAN 14-3-3 protein epsilon               | 9  |                                         | HLIPAANTGESKVFYYK            | 106 | 17 | 3  | 23.58 | y4y5y14                                    | 1938.00 | 66.480  | 138840 | 3 | 646.67  | -5.480  |



|                                                    |    |                                                                   |                                |     |    |    |       |                                          |         |         |        |   |         |         |
|----------------------------------------------------|----|-------------------------------------------------------------------|--------------------------------|-----|----|----|-------|------------------------------------------|---------|---------|--------|---|---------|---------|
| P62258 1433E_HUMAN 14-3-3 protein epsilon          | 10 |                                                                   | LAEQAERYDEMVESMK               | 12  | 16 | 6  | 38.97 | b10b11y4y5°y5y10                         | 1928.85 | 88.552  | 14152  | 2 | 964.93  | -12.657 |
| P62258 1433E_HUMAN 14-3-3 protein epsilon          | 11 | Carbamidomethyl+C(3); Carbamidomethyl+C(4)                        | LICCDILDVLDKHLIPAANTGESK       | 94  | 24 | 3  | 18.16 | y4y6y9                                   | 2695.35 | 93.465  | 10995  | 4 | 674.59  | -10.869 |
| P62258 1433E_HUMAN 14-3-3 protein epsilon          | 12 |                                                                   | EDLVYQAKLAEQAER                | 4   | 15 | 6  | 27.13 | b4b5b11y5°y5*y5                          | 1762.88 | 81.182  | 9717   | 3 | 588.30  | -10.110 |
| P62258 1433E_HUMAN 14-3-3 protein epsilon          | 13 |                                                                   | MDDREDLVYQAK                   | 0   | 12 | 3  | 30.72 | y4y8y11                                  | 1482.68 | 136.505 | 8716   | 1 | 1482.68 | -4.693  |
| P62258 1433E_HUMAN 14-3-3 protein epsilon          | 14 | Carbamidomethyl+C(11);Carbamidomethyl+C(12)                       | QMVETELKLI CCDILDVL DK         | 86  | 20 | 3  | 13.21 | b3b8y10                                  | 2435.19 | 43.313  | 3360   | 4 | 609.55  | -12.131 |
| P62258 1433E_HUMAN 14-3-3 protein epsilon          | 15 |                                                                   | GDYHRYLAEFATGNDR               | 125 | 16 | 6  | 31.77 | b9b11y3y5y11°y11                         | 1884.88 | 80.098  | 2033   | 2 | 942.94  | 7.254   |
| P62258 1433E_HUMAN 14-3-3 protein epsilon          | 16 |                                                                   | EYRQMVETELK                    | 83  | 11 | 4  | 29.45 | b3°b3b7b8                                | 1425.69 | 103.312 | 2004   | 2 | 713.35  | -12.415 |
| P62258 1433E_HUMAN 14-3-3 protein epsilon          | 17 | Oxidation+M(4)                                                    | VAGMDVELTVEER                  | 29  | 13 | 4  | 23.72 | b3b4y5°y5                                | 1463.70 | 64.917  | 7927   | 2 | 732.35  | -2.419  |
| P62258 1433E_HUMAN 14-3-3 protein epsilon          | 18 |                                                                   | NLLSVAYK                       | 42  | 8  | 0  | 1.44  |                                          | 890.50  | 58.009  | 2222   | 2 | 445.75  | 6.374   |
| Q9BUN1 CA056_HUMAN Uncharacterized protein C1orf56 | 1  |                                                                   | ELPSATPNTAGSSSTR               | 122 | 16 | 14 | 71.98 | b2b4b5b12b13°b13y2°y2y4y8°y8y11y14y16    | 1575.78 | 45.755  | 157910 | 3 | 525.93  | 9.761   |
| Q9BUN1 CA056_HUMAN Uncharacterized protein C1orf56 | 2  |                                                                   | STEDLPGSQATLSQWSTPGSTPSR       | 160 | 24 | 13 | 51.23 | b1b2b3b11b12b13°b13b14*b14y11y13°y13*y13 | 2490.17 | 75.277  | 9238   | 3 | 830.73  | -3.039  |
| Q9BUN1 CA056_HUMAN Uncharacterized protein C1orf56 | 3  | Carbamidomethyl+C(5); Carbamidomethyl+C(12);Carbamidomethyl+C(17) | LREECPLDTS LCTDTNCASQSTTS TR   | 257 | 26 | 6  | 28.13 | b5b8b9b11y6y9                            | 3003.32 | 68.206  | 6120   | 3 | 1001.78 | 3.414   |
| Q9BUN1 CA056_HUMAN Uncharacterized protein C1orf56 | 4  |                                                                   | IGLEDIWNLSVFTMQPIDR            | 316 | 22 | 9  | 32.09 | b5b10y5*y5y7*y7y9y12*y12                 | 2550.24 | 117.262 | 11990  | 3 | 850.75  | -5.552  |
| Q9BUN1 CA056_HUMAN Uncharacterized protein C1orf56 | 5  | Carbamidomethyl+C(11);Carbamidomethyl+C(13)                       | LVLMPWGPWHCHCK                 | 200 | 14 | 5  | 35.88 | b10b12b13y3y7                            | 1820.86 | 74.555  | 9351   | 4 | 455.97  | 1.073   |
| Q9BUN1 CA056_HUMAN Uncharacterized protein C1orf56 | 6  |                                                                   | WSPSPPTAMPSPEDLR               | 184 | 16 | 10 | 60.4  | b3b4b7b9y6y7°y7y11°y11y13                | 1767.84 | 65.805  | 4457   | 2 | 884.42  | 0.552   |
| Q9BUN1 CA056_HUMAN Uncharacterized protein C1orf56 | 7  |                                                                   | AAGAQGLTQTPTEMQR               | 19  | 16 | 8  | 79.13 | b4b5b10b11b12y10y11y12                   | 1659.82 | 93.649  | 4334   | 2 | 830.41  | 4.045   |
| Q9BUN1 CA056_HUMAN Uncharacterized protein C1orf56 | 8  |                                                                   | FIANSQEPEIR                    | 138 | 11 | 4  | 38.89 | b4b7b10y9                                | 1303.65 | 26.429  | 3284   | 2 | 652.33  | -10.581 |
| Q9BUN1 CA056_HUMAN Uncharacterized protein C1orf56 | 9  |                                                                   | DSTSRELPATPNTAGSSSTR           | 117 | 21 | 3  | 12.79 | b7b15y8                                  | 2122.00 | 100.755 | 58943  | 3 | 708.00  | -2.186  |
| Q9BUN1 CA056_HUMAN Uncharacterized protein C1orf56 | 10 |                                                                   | IGLEDIWNLSVFTMQPIDRNR          | 316 | 25 | 6  | 24.68 | b6b7°b7b9y5y9                            | 2948.41 | 71.824  | 34599  | 5 | 590.49  | -14.822 |
| Q9BUN1 CA056_HUMAN Uncharacterized protein C1orf56 | 11 |                                                                   | VSLRFGGPMTR                    | 35  | 11 | 3  | 29.45 | y3y4y8                                   | 1220.66 | 68.135  | 18918  | 2 | 610.84  | 5.600   |
| Q9BUN1 CA056_HUMAN Uncharacterized protein C1orf56 | 12 |                                                                   | ELPSATPNTAGSSSTRFIANSQEPEIR    | 122 | 27 | 6  | 23.81 | b3b9y6°y6y7y24                           | 2860.37 | 86.571  | 9001   | 3 | 954.13  | -11.693 |
| Q9BUN1 CA056_HUMAN Uncharacterized protein C1orf56 | 13 |                                                                   | SSAINEEDGSSEGVVINAGKDSTSR      | 96  | 26 | 3  | 11.43 | b10b14y5                                 | 2638.22 | 92.532  | 2091   | 2 | 1319.62 | 6.200   |
| Q9BUN1 CA056_HUMAN Uncharacterized protein C1orf56 | 14 | Oxidation+M(14)                                                   | AAGAQGLTQTPTEMQR               | 19  | 16 | 5  | 40.62 | b5b6b10°b10b11                           | 1675.82 | 105.781 | 2387   | 3 | 559.28  | 8.304   |
| Q9BUN1 CA056_HUMAN Uncharacterized protein C1orf56 | 15 |                                                                   | STEDLPGSQATLSQWSTPGSTPSR       | 160 | 24 | 1  | 8.79  | y8                                       | 2472.18 | 75.290  | 12825  | 3 | 824.73  | 6.518   |
| P09104 ENOG_HUMAN Gamma-enolase                    | 1  |                                                                   | HIAQLAGNSDLILPVPAFNVINGGSHAGNK | 132 | 30 | 11 | 36.73 | b2b3y1y2y6y8y9y10y14°y14y30              | 3024.59 | 95.554  | 149033 | 4 | 756.90  | -4.359  |
| P09104 ENOG_HUMAN Gamma-enolase                    | 2  |                                                                   | AAVPSGASTGIYEALRLR             | 32  | 18 | 8  | 51.2  | b7b12y7y10y13y14y15y18                   | 1804.95 | 78.562  | 51936  | 2 | 902.98  | 3.787   |
| P09104 ENOG_HUMAN Gamma-enolase                    | 3  |                                                                   | LAMQEFMILPVGAESFR              | 162 | 17 | 5  | 34.78 | b6b7b8y6°y6                              | 1939.00 | 87.521  | 6178   | 3 | 647.00  | 7.932   |

|                                                     |    |                       |                                       |      |    |    |       |                                   |         |         |        |   |         |         |
|-----------------------------------------------------|----|-----------------------|---------------------------------------|------|----|----|-------|-----------------------------------|---------|---------|--------|---|---------|---------|
| [P09104]ENOG_HUMAN Gamma-enolase                    | 4  |                       | DYPVVSIEDPFDQDDWAAWSK                 | 285  | 21 | 4  | 19.84 | b6b10b13y8                        | 2483.13 | 94.387  | 2116   | 3 | 828.38  | 10.815  |
| [P09104]ENOG_HUMAN Gamma-enolase                    | 5  |                       | LAQENGWGVMSHR                         | 358  | 14 | 4  | 29.15 | b3b5b10y13                        | 1583.76 | 83.973  | 1727   | 2 | 792.39  | -6.629  |
| [P09104]ENOG_HUMAN Gamma-enolase                    | 6  |                       | IVIGMDVAASEFYR                        | 239  | 14 | 6  | 39.26 | b12y3y8y9°y9y11                   | 1570.81 | 54.221  | 162649 | 2 | 785.91  | 10.802  |
| [P09104]ENOG_HUMAN Gamma-enolase                    | 7  | Carbamidomethyl+C(14) | VNQIGSVTEAIQACK                       | 343  | 15 | 7  | 44.56 | b5b8b14°b14y4y12y14               | 1617.83 | 94.509  | 2603   | 2 | 809.42  | 1.132   |
| [P09104]ENOG_HUMAN Gamma-enolase                    | 8  |                       | AVDHINSTIAPALISSGLSVVEQEK             | 64   | 25 | 8  | 17.29 | b7°b7b10°b10b12°b12y5*y5          | 2578.32 | 109.324 | 1914   | 2 | 1289.67 | -19.127 |
| [P09104]ENOG_HUMAN Gamma-enolase                    | 9  |                       | AGYTEKIVIGMDVAASEFYR                  | 233  | 20 | 4  | 25.96 | b3b4y7y11                         | 2220.08 | 94.386  | 7922   | 2 | 1110.54 | -10.007 |
| [P09104]ENOG_HUMAN Gamma-enolase                    | 10 |                       | SPTDPSRYITGDQLGALYQDFVR               | 262  | 23 | 3  | 12.12 | b8y6y11                           | 2599.27 | 109.295 | 5482   | 3 | 867.09  | -4.696  |
| [P09104]ENOG_HUMAN Gamma-enolase                    | 11 |                       | LAMQEFMILPVGAESFRDAMR                 | 162  | 21 | 4  | 19.84 | b20y5y10y12                       | 2412.16 | 84.024  | 4380   | 2 | 1206.58 | -11.639 |
| [P09104]ENOG_HUMAN Gamma-enolase                    | 12 |                       | EAIDKAGYTEK                           | 228  | 11 | 3  | 34.22 | b6b7b8                            | 1224.62 | 76.189  | 1968   | 2 | 612.81  | 6.878   |
| [P09104]ENOG_HUMAN Gamma-enolase                    | 13 | Phosphoryl STY(15)    | FTANVGIQIVGDDLTVTNPK                  | 306  | 20 | 6  | 33.44 | b3b13b16y4*y4y5                   | 2182.09 | 76.748  | 11109  | 3 | 728.04  | 11.524  |
| [P09104]ENOG_HUMAN Gamma-enolase                    | 14 | Phosphoryl STY(8)     | LGAEVYHTLK                            | 183  | 10 | 4  | 39.76 | b5b7b9_H3PO4 b9°b9                | 1210.59 | 67.067  | 5218   | 1 | 1210.59 | 8.470   |
| [P09104]ENOG_HUMAN Gamma-enolase                    | 15 | Oxidation+M(5)        | LDNLMLELDGTENK                        | 89   | 14 | 3  | 17.67 | b4y7y9                            | 1620.78 | 62.711  | 175280 | 2 | 810.90  | 3.163   |
| [P09104]ENOG_HUMAN Gamma-enolase                    | 16 | Oxidation+M(5)        | IVIGMDVAASEFYR                        | 239  | 14 | 4  | 17.67 | b6°b6b12y7                        | 1586.77 | 47.981  | 11417  | 2 | 793.89  | -12.540 |
| [Q6TFL3]CI093_HUMAN Uncharacterized protein C9orf93 | 1  |                       | QTSELEFSTQREER                        | 254  | 14 | 8  | 35.88 | b7b11y1y3y4°y4y7y14               | 1739.84 | 84.394  | 36010  | 3 | 580.62  | 11.647  |
| [Q6TFL3]CI093_HUMAN Uncharacterized protein C9orf93 | 2  |                       | RELQFVQEQDTAVQNMHK                    | 217  | 19 | 5  | 21.65 | b8y8y11y13y19                     | 2314.15 | 53.299  | 21139  | 3 | 772.06  | -2.849  |
| [Q6TFL3]CI093_HUMAN Uncharacterized protein C9orf93 | 3  |                       | ELELQYSELFLEVQK                       | 665  | 15 | 12 | 51.74 | b2b7b9°b9°b9b10°b10b11b13°b13y1y9 | 1867.97 | 99.918  | 19438  | 2 | 934.49  | 1.503   |
| [Q6TFL3]CI093_HUMAN Uncharacterized protein C9orf93 | 4  |                       | AQAAQSESELQK                          | 542  | 12 | 5  | 33.73 | b4b5b6b7°y12                      | 1289.64 | 38.797  | 13773  | 3 | 430.55  | 8.235   |
| [Q6TFL3]CI093_HUMAN Uncharacterized protein C9orf93 | 5  |                       | ELQQTQEDTFTK                          | 636  | 12 | 6  | 46.38 | b2b5y5y7y8y9                      | 1467.68 | 71.801  | 8705   | 2 | 734.34  | -11.395 |
| [Q6TFL3]CI093_HUMAN Uncharacterized protein C9orf93 | 6  |                       | SHEQLVLENSHFVK                        | 701  | 14 | 6  | 36.68 | b6b10b13y2y3y7                    | 1695.89 | 76.840  | 5777   | 3 | 565.97  | 2.303   |
| [Q6TFL3]CI093_HUMAN Uncharacterized protein C9orf93 | 7  |                       | NQTLGEAVK                             | 1080 | 9  | 4  | 28.49 | b5b7°b7y6                         | 959.52  | 34.947  | 3195   | 2 | 480.26  | 6.234   |
| [Q6TFL3]CI093_HUMAN Uncharacterized protein C9orf93 | 8  |                       | AELDTTYTFLK                           | 1282 | 11 | 3  | 29.45 | b5b8b9                            | 1301.66 | 76.263  | 2612   | 1 | 1301.66 | -0.844  |
| [Q6TFL3]CI093_HUMAN Uncharacterized protein C9orf93 | 9  |                       | SFMDVYQLASTR                          | 1204 | 12 | 3  | 20.51 | b3b9y7                            | 1417.68 | 68.242  | 1667   | 2 | 709.34  | 0.344   |
| [Q6TFL3]CI093_HUMAN Uncharacterized protein C9orf93 | 10 |                       | EMTSHR                                | 1222 | 6  | 2  | 25.39 | b4b5                              | 760.34  | 48.339  | 58507  | 1 | 760.34  | -6.904  |
| [Q6TFL3]CI093_HUMAN Uncharacterized protein C9orf93 | 11 |                       | LHAAEVER                              | 982  | 8  | 5  | 63.71 | b5b7y3y4y6                        | 924.49  | 24.930  | 34083  | 2 | 462.75  | -1.651  |
| [Q6TFL3]CI093_HUMAN Uncharacterized protein C9orf93 | 12 |                       | HLTQLEQDK                             | 1110 | 9  | 8  | 58.17 | b3y3°y3°y3y4y5°y5y7               | 1111.55 | 21.952  | 28417  | 2 | 556.28  | -20.646 |
| [Q6TFL3]CI093_HUMAN Uncharacterized protein C9orf93 | 13 |                       | SVNEMK                                | 1002 | 6  | 5  | 37.84 | b3°b3°b3b4y4                      | 707.34  | 26.530  | 11282  | 1 | 707.34  | 0.777   |
| [Q6TFL3]CI093_HUMAN Uncharacterized protein C9orf93 | 14 | Carbamidomethyl+C(8)  | GGPEVVACQAMIK                         | 1191 | 13 | 3  | 18.95 | b3y5y8                            | 1359.65 | 63.535  | 11193  | 2 | 680.33  | -16.609 |
| [Q6TFL3]CI093_HUMAN Uncharacterized protein C9orf93 | 15 | Carbamidomethyl+C(9)  | VELQNVLHCWEK                          | 528  | 12 | 6  | 46.38 | b3y6y8y9°y9y10                    | 1554.80 | 65.861  | 8431   | 3 | 518.94  | 19.000  |
| [Q6TFL3]CI093_HUMAN Uncharacterized protein C9orf93 | 16 |                       | ETFINTVPHALTSSHSSPVTMSAN<br>ANRPTQIGL | 1293 | 33 | 6  | 22.24 | b6b8b10°b10°b10b14                | 3478.71 | 132.222 | 7376   | 4 | 870.43  | -9.545  |

|                                                    |    |                       |                              |      |    |    |       |                                     |         |         |        |   |         |         |
|----------------------------------------------------|----|-----------------------|------------------------------|------|----|----|-------|-------------------------------------|---------|---------|--------|---|---------|---------|
| Q6TFL3 CI093_HUMAN Uncharacterized protein C9orf93 | 17 | Carbamidomethyl+C(6)  | HLEYICK                      | 622  | 7  | 5  | 35.31 | b3°b3b4y5°y5                        | 962.50  | 48.681  | 5056   | 2 | 481.75  | 20.103  |
| Q6TFL3 CI093_HUMAN Uncharacterized protein C9orf93 | 18 | Carbamidomethyl+C(5)  | FESACEELNNALLR               | 1034 | 14 | 5  | 29.15 | b3b8°b8b10y10                       | 1665.78 | 32.523  | 4257   | 2 | 833.39  | -4.763  |
| Q6TFL3 CI093_HUMAN Uncharacterized protein C9orf93 | 19 |                       | ETALEEFR                     | 199  | 8  | 3  | 34.03 | b4y4y6                              | 994.47  | 41.454  | 3901   | 2 | 497.74  | -18.228 |
| Q6TFL3 CI093_HUMAN Uncharacterized protein C9orf93 | 20 |                       | QTSELEFSTQR                  | 254  | 11 | 4  | 22.46 | b8b10y9°y9                          | 1325.62 | 32.490  | 3107   | 2 | 663.31  | -9.209  |
| Q6TFL3 CI093_HUMAN Uncharacterized protein C9orf93 | 21 |                       | ELQFIVQEQDTAVQNMHK           | 218  | 18 | 11 | 38.37 | b3°b3*b3b5°b5b9y6*y6y12y13*y13      | 2158.06 | 85.857  | 2825   | 2 | 1079.54 | 1.584   |
| Q6TFL3 CI093_HUMAN Uncharacterized protein C9orf93 | 22 |                       | DFLQEQVNTFELFK               | 752  | 14 | 4  | 17.67 | b4°b4y5y10                          | 1757.85 | 70.509  | 2128   | 2 | 879.43  | -12.430 |
| Q6TFL3 CI093_HUMAN Uncharacterized protein C9orf93 | 23 |                       | SEVEK                        | 71   | 5  | 1  | 12.45 | b3                                  | 591.30  | 26.801  | 1928   | 1 | 591.30  | 6.503   |
| Q6TFL3 CI093_HUMAN Uncharacterized protein C9orf93 | 24 |                       | QPEGMLDK                     | 585  | 8  | 5  | 31.02 | b3°b3*b3b4y3                        | 917.44  | 32.088  | 1900   | 2 | 459.23  | 4.125   |
| Q6TFL3 CI093_HUMAN Uncharacterized protein C9orf93 | 25 |                       | ADPNRS                       | 889  | 6  | 4  | 37.84 | b3b4y3*y3                           | 659.31  | 82.683  | 1631   | 1 | 659.31  | 1.944   |
| Q6TFL3 CI093_HUMAN Uncharacterized protein C9orf93 | 26 |                       | MNLNTSSNTGDTQR               | 0    | 14 | 5  | 25.19 | b5b11y6y9°y9                        | 1538.72 | 60.072  | 1598   | 2 | 769.86  | 21.500  |
| Q6TFL3 CI093_HUMAN Uncharacterized protein C9orf93 | 27 | Carbamidomethyl+C(9)  | HQAFLVETCENNVK               | 408  | 14 | 4  | 17.67 | b8°b8b11y8                          | 1688.84 | 62.843  | 1584   | 3 | 563.62  | 19.950  |
| Q6TFL3 CI093_HUMAN Uncharacterized protein C9orf93 | 28 | Carbamidomethyl+C(7)  | ISLVMCEIPLHSSR               | 915  | 14 | 3  | 26.24 | y4y9y13                             | 1641.81 | 47.903  | 1537   | 2 | 821.41  | -22.231 |
| Q6TFL3 CI093_HUMAN Uncharacterized protein C9orf93 | 29 | Carbamidomethyl+C(20) | LHLETFAMEGLKGGPEVVACQAMIK    | 1179 | 25 | 4  | 21.17 | b23y9y10°y10                        | 2729.37 | 79.377  | 19208  | 4 | 683.10  | -5.635  |
| Q6TFL3 CI093_HUMAN Uncharacterized protein C9orf93 | 30 |                       | AFQTSQQKWK                   | 132  | 10 | 8  | 54.67 | b4b5°b5b6°b6b9°b9y9                 | 1251.65 | 80.126  | 14494  | 2 | 626.33  | 3.706   |
| Q6TFL3 CI093_HUMAN Uncharacterized protein C9orf93 | 31 | Carbamidomethyl+C(10) | KHQAFLVETCENNVK              | 407  | 15 | 4  | 16.6  | b12y5°y5y13                         | 1816.87 | 62.031  | 13673  | 3 | 606.30  | -14.579 |
| Q6TFL3 CI093_HUMAN Uncharacterized protein C9orf93 | 32 | Carbamidomethyl+C(7)  | FSWSSELCAVLQENVDALIADLNRANEK | 593  | 27 | 5  | 21.16 | b11y5y8*y8y9                        | 3105.55 | 112.926 | 13443  | 4 | 777.14  | 4.953   |
| Q6TFL3 CI093_HUMAN Uncharacterized protein C9orf93 | 33 |                       | ELESILDSFTVSGQWTSGIHKDK      | 422  | 23 | 3  | 12.12 | b13y9y11                            | 2577.30 | 90.688  | 5737   | 3 | 859.77  | 6.442   |
| Q6TFL3 CI093_HUMAN Uncharacterized protein C9orf93 | 34 |                       | RLEENIHDAESALR               | 1120 | 14 | 4  | 26.24 | b4b9°b9b12                          | 1652.85 | 43.325  | 4909   | 2 | 826.93  | 10.414  |
| Q6TFL3 CI093_HUMAN Uncharacterized protein C9orf93 | 35 |                       | FQEIAEKMEK                   | 684  | 11 | 3  | 22.46 | b3b5y6                              | 1366.66 | 90.240  | 4537   | 3 | 456.23  | -4.913  |
| Q6TFL3 CI093_HUMAN Uncharacterized protein C9orf93 | 36 |                       | ELQQTQEDTFTKVAEQIK           | 636  | 18 | 3  | 14.27 | b10b14y13                           | 2136.11 | 86.387  | 4353   | 2 | 1068.56 | 12.801  |
| Q6TFL3 CI093_HUMAN Uncharacterized protein C9orf93 | 37 |                       | RFEHDLEER                    | 146  | 9  | 5  | 42.19 | b7b8°b8y6y7                         | 1230.58 | 40.620  | 3708   | 1 | 1230.58 | -4.266  |
| Q6TFL3 CI093_HUMAN Uncharacterized protein C9orf93 | 38 |                       | SDTMRELQQTQEDTFTK            | 631  | 17 | 3  | 14.93 | b9b11y7                             | 2057.94 | 99.798  | 3674   | 2 | 1029.47 | -1.068  |
| Q6TFL3 CI093_HUMAN Uncharacterized protein C9orf93 | 39 |                       | LEENIHDAESALRMAAK            | 1121 | 17 | 5  | 25.24 | b3b4b7°b7y11                        | 1897.94 | 71.082  | 2777   | 2 | 949.48  | 0.000   |
| Q6TFL3 CI093_HUMAN Uncharacterized protein C9orf93 | 40 |                       | IMTLEKEMTSR                  | 1216 | 12 | 6  | 29.65 | b5b8y4°y4y7°y7                      | 1475.76 | 80.180  | 2606   | 3 | 492.59  | 14.558  |
| Q6TFL3 CI093_HUMAN Uncharacterized protein C9orf93 | 41 |                       | ELDKAQLQMQLNEFK              | 1009 | 16 | 5  | 15.7  | b7°b7b13y8°y8                       | 1891.94 | 93.099  | 2165   | 2 | 946.47  | -10.194 |
| Q6TFL3 CI093_HUMAN Uncharacterized protein C9orf93 | 42 |                       | QTSELEFSTQREER               | 254  | 14 | 3  | 23.11 | b11y11y12                           | 1739.80 | 100.529 | 2039   | 2 | 870.40  | -11.647 |
| Q6TFL3 CI093_HUMAN Uncharacterized protein C9orf93 | 43 | Phosphoryl STY(7)     | DKPPSFSVVLER                 | 445  | 12 | 3  | 20.51 | b5y7y9                              | 1453.69 | 39.463  | 100385 | 3 | 485.23  | -6.382  |
| Q6TFL3 CI093_HUMAN Uncharacterized protein C9orf93 | 44 | Phosphoryl STY(9)     | DKDKPPSFSVVLER               | 443  | 14 | 10 | 64.01 | b7b9_HPO3<br>b9°b9y6°y6y7°y7y8y9y12 | 1696.82 | 42.598  | 11713  | 2 | 848.91  | -1.223  |
| Q6TFL3 CI093_HUMAN Uncharacterized protein C9orf93 | 45 | Phosphoryl STY(7)     | ELELQYSELFLEVQK              | 665  | 15 | 4  | 27.13 | b6y3y10y11                          | 1947.90 | 71.002  | 9748   | 3 | 649.97  | -10.591 |

|                                                       |    |                                            |                                         |      |    |    |       |                                            |         |         |        |   |         |         |
|-------------------------------------------------------|----|--------------------------------------------|-----------------------------------------|------|----|----|-------|--------------------------------------------|---------|---------|--------|---|---------|---------|
| [Q6TFL3]CI093_HUMAN Uncharacterized protein C9orf93   | 46 | Phosphoryl STY(10)                         | NEMESHIRETALEEFR                        | 191  | 16 | 5  | 22.03 | b7_H3PO4 b7_HPO3<br>b7b9°b9y6y10_H3PO4 y10 | 2070.90 | 42.665  | 6688   | 3 | 690.97  | 6.484   |
| [Q6TFL3]CI093_HUMAN Uncharacterized protein C9orf93   | 47 | Carbamidomethyl+C(1);<br>Phosphoryl STY(9) | CADREALISTLK                            | 516  | 12 | 3  | 30.72 | b5b7b9_H3PO4 b9                            | 1456.69 | 25.552  | 2134   | 2 | 728.85  | 6.369   |
| [Q6TFL3]CI093_HUMAN Uncharacterized protein C9orf93   | 48 | Phosphoryl STY(12)                         | ELESILDSFTVSGQWTSGIHKDKD<br>KPPSFSVVLER | 422  | 35 | 5  | 19.46 | b4b7b10b12_H3PO4<br>b12_HPO3 b12y28        | 4011.99 | 120.382 | 1986   | 5 | 803.20  | 6.511   |
| [Q6TFL3]CI093_HUMAN Uncharacterized protein C9orf93   | 49 | Phosphoryl STY(7)                          | TLAQUALSTVEEK                           | 770  | 12 | 4  | 34.72 | b5b8b11_H3PO4 b11y9                        | 1369.64 | 97.999  | 1562   | 2 | 685.32  | -7.130  |
| [Q6TFL3]CI093_HUMAN Uncharacterized protein C9orf93   | 50 | Phosphoryl STY(6)                          | VRDQISLSWSAASR                          | 1156 | 14 | 8  | 46.79 | b3b4b6b12°b12y6°y6y10                      | 1655.78 | 83.994  | 1544   | 2 | 828.39  | 0.811   |
| [Q6TFL3]CI093_HUMAN Uncharacterized protein C9orf93   | 51 | Carbamidomethyl+C(9);<br>Oxidation+M(3)    | EQMSLLAACALMAGALYPLYSR                  | 722  | 22 | 6  | 16.39 | b8°b8b15°b15y5y8                           | 2445.19 | 68.113  | 5130   | 3 | 815.73  | -4.194  |
| [Q6TFL3]CI093_HUMAN Uncharacterized protein C9orf93   | 52 | Carbamidomethyl+C(8);<br>Oxidation+M(13)   | MAAKDKECVANHMR                          | 1134 | 14 | 8  | 57.48 | b7b9b10°b10y4y6y7y9                        | 1676.76 | 59.539  | 4928   | 2 | 838.89  | -1.820  |
| [Q6TFL3]CI093_HUMAN Uncharacterized protein C9orf93   | 53 | Oxidation+M(4)                             | SDTMRELQQTQEDTFTK                       | 631  | 17 | 4  | 22.33 | y6y9y11°y11                                | 2073.92 | 82.707  | 3742   | 2 | 1037.46 | -9.888  |
| [Q6TFL3]CI093_HUMAN Uncharacterized protein C9orf93   | 54 | Carbamidomethyl+C(2);<br>Oxidation+M(11)   | SCSELQEELVMAKK                          | 394  | 14 | 3  | 17.67 | b3b10y4                                    | 1667.78 | 46.852  | 2840   | 3 | 556.60  | -13.467 |
| [P11142]HSP7C_HUMAN Heat shock cognate 71 kDa protein | 1  |                                            | TTPSYVAFDTER                            | 36   | 13 | 12 | 71.77 | b1°b1b5°b5b9y1y3y5y6y9y11y<br>13           | 1487.71 | 55.116  | 52107  | 2 | 744.36  | 5.580   |
| [P11142]HSP7C_HUMAN Heat shock cognate 71 kDa protein | 2  |                                            | NQVAMNPTNTVFDAK                         | 56   | 15 | 5  | 22.62 | b3y11°y11y12y15                            | 1649.80 | 57.493  | 25790  | 2 | 825.40  | 3.700   |
| [P11142]HSP7C_HUMAN Heat shock cognate 71 kDa protein | 3  |                                            | TVTNAVVTVPAYFNDSQR                      | 137  | 18 | 7  | 55.7  | y3y4°y4y5y9y11y12                          | 1982.01 | 69.063  | 24638  | 2 | 991.51  | 6.529   |
| [P11142]HSP7C_HUMAN Heat shock cognate 71 kDa protein | 4  |                                            | STAGDTHLGGEDFDNR                        | 220  | 16 | 6  | 35.14 | b1b4y8y9y10y16                             | 1691.72 | 38.466  | 18315  | 3 | 564.58  | -5.123  |
| [P11142]HSP7C_HUMAN Heat shock cognate 71 kDa protein | 5  |                                            | FEELNADLFR                              | 301  | 10 | 4  | 37.44 | b3y4y7y8                                   | 1253.61 | 74.377  | 22953  | 2 | 627.31  | -3.700  |
| [P11142]HSP7C_HUMAN Heat shock cognate 71 kDa protein | 6  |                                            | EIAEAYLGK                               | 128  | 9  | 3  | 36.27 | b5b6b8                                     | 993.52  | 60.019  | 11706  | 2 | 497.26  | -7.618  |
| [P11142]HSP7C_HUMAN Heat shock cognate 71 kDa protein | 7  |                                            | GTLDPVEK                                | 311  | 8  | 4  | 31.02 | b3b4y4°y4                                  | 858.45  | 33.066  | 11695  | 2 | 429.73  | -7.608  |
| [P11142]HSP7C_HUMAN Heat shock cognate 71 kDa protein | 8  |                                            | GVPQIEVTFDIDANGILNVAVDK                 | 469  | 24 | 4  | 11.85 | b3b13°b13y5                                | 2514.27 | 67.652  | 10593  | 3 | 838.76  | -13.885 |
| [P11142]HSP7C_HUMAN Heat shock cognate 71 kDa protein | 9  |                                            | TLSSSTQASIEIDSLYEGIDFYTSIT<br>R         | 272  | 27 | 4  | 11.28 | b12°b12y6y9                                | 2997.46 | 83.974  | 5148   | 4 | 750.12  | -0.815  |
| [P11142]HSP7C_HUMAN Heat shock cognate 71 kDa protein | 10 |                                            | VEIANDQGNR                              | 25   | 11 | 5  | 32.69 | b5°b5b7y7y9                                | 1228.63 | 55.695  | 3572   | 3 | 410.21  | 1.192   |
| [P11142]HSP7C_HUMAN Heat shock cognate 71 kDa protein | 11 |                                            | VQVEYK                                  | 102  | 6  | 1  | 12.93 | y3                                         | 765.41  | 39.259  | 3435   | 2 | 383.21  | 0.399   |
| [P11142]HSP7C_HUMAN Heat shock cognate 71 kDa protein | 12 |                                            | QTQFTTYSNQPGLVQVYEGER                   | 423  | 24 | 4  | 24.54 | b3b4y3y6                                   | 2774.34 | 97.875  | 3307   | 3 | 925.45  | 6.248   |
| [P11142]HSP7C_HUMAN Heat shock cognate 71 kDa protein | 13 |                                            | NSLESYAFNMK                             | 539  | 11 | 5  | 22.46 | b8°b8y5y8°y8                               | 1303.58 | 50.355  | 3298   | 2 | 652.29  | -15.732 |
| [P11142]HSP7C_HUMAN Heat shock cognate 71 kDa protein | 14 |                                            | HWPFMVVNDAGRPK                          | 88   | 14 | 3  | 17.67 | b11y8y11                                   | 1653.80 | 60.870  | 3098   | 2 | 827.40  | -18.157 |
| [P11142]HSP7C_HUMAN Heat shock cognate 71 kDa protein | 15 |                                            | DISENK                                  | 251  | 6  | 2  | 25.39 | y4y5                                       | 705.34  | 49.324  | 1769   | 1 | 705.34  | -5.365  |
| [P11142]HSP7C_HUMAN Heat shock cognate 71 kDa protein | 16 |                                            | QTQFTTYSNQPGLVQVYEGER<br>AMTK           | 423  | 28 | 5  | 21.01 | b7y3°y3y4y10                               | 3205.58 | 80.170  | 250740 | 4 | 802.15  | 8.835   |
| [P11142]HSP7C_HUMAN Heat shock cognate 71 kDa protein | 17 |                                            | NSLESYAFNMKATVEDEK                      | 539  | 18 | 5  | 24.5  | b12y8°y8y9y11                              | 2075.99 | 60.964  | 4966   | 3 | 692.67  | 14.113  |
| [P11142]HSP7C_HUMAN Heat shock cognate 71 kDa protein | 18 |                                            | RFDDAVVQSDMK                            | 76   | 12 | 3  | 20.51 | b10y4y6                                    | 1410.67 | 45.048  | 4820   | 2 | 705.84  | -0.519  |

|                                                      |    |                       |                                 |     |    |    |       |                              |         |         |        |   |         |         |
|------------------------------------------------------|----|-----------------------|---------------------------------|-----|----|----|-------|------------------------------|---------|---------|--------|---|---------|---------|
| P11142 HSP7C_HUMAN Heat shock cognate 71 kDa protein | 19 |                       | MVQEAEKYK                       | 517 | 9  | 5  | 28.49 | b3*b3b8y6*y6                 | 1125.55 | 94.427  | 2670   | 1 | 1125.55 | -7.700  |
| P11142 HSP7C_HUMAN Heat shock cognate 71 kDa protein | 20 |                       | LIGDAAKNQVAMNPTNTVFDKAK         | 49  | 22 | 7  | 32.09 | b3b6y4y8*y8y11y21            | 2318.16 | 95.482  | 2418   | 2 | 1159.59 | -6.951  |
| P11142 HSP7C_HUMAN Heat shock cognate 71 kDa protein | 21 |                       | NQVAMNPTNTVFDKAKR               | 56  | 16 | 8  | 45.99 | b3b4b5b12*b12y10*y10y12      | 1805.89 | 116.304 | 1618   | 2 | 903.45  | -2.231  |
| P11142 HSP7C_HUMAN Heat shock cognate 71 kDa protein | 22 |                       | GETKSFYPEEVSSMVLTK              | 108 | 18 | 3  | 14.27 | b3b12y12                     | 2031.98 | 96.977  | 1526   | 3 | 678.00  | -6.068  |
| P11142 HSP7C_HUMAN Heat shock cognate 71 kDa protein | 23 | Phosphoryl STY(9)     | SFYPEEVSSMVLTK                  | 112 | 14 | 4  | 17.67 | b8_HPO3 b8b13y7*y7           | 1696.77 | 95.530  | 3087   | 3 | 566.26  | 14.820  |
| P11142 HSP7C_HUMAN Heat shock cognate 71 kDa protein | 24 | Oxidation+M(5)        | NQVAMNPTNTVFDKAKR               | 56  | 16 | 3  | 22.23 | b3b4y15                      | 1821.88 | 76.238  | 10340  | 3 | 607.97  | -3.953  |
| P13929 ENOB_HUMAN Beta-enolase                       | 1  |                       | AAVPSGASTGIYEALRLR              | 32  | 18 | 8  | 51.2  | b7b12y7y10y13y14y15y18       | 1804.95 | 78.562  | 51936  | 2 | 902.98  | 3.787   |
| P13929 ENOB_HUMAN Beta-enolase                       | 2  |                       | VVIGMDVAASEFYR                  | 239 | 14 | 6  | 46.35 | y9y10y11*y11y12y14           | 1556.79 | 67.132  | 8791   | 2 | 778.90  | 7.136   |
| P13929 ENOB_HUMAN Beta-enolase                       | 3  |                       | LGELYK                          | 275 | 6  | 4  | 40.85 | b3b5*b5y5                    | 722.41  | 41.731  | 150549 | 1 | 722.41  | -2.112  |
| P13929 ENOB_HUMAN Beta-enolase                       | 4  |                       | LAMQEFMILPVGASSFK               | 162 | 17 | 4  | 23.58 | b3b14*b14b15                 | 1868.94 | 65.719  | 7372   | 2 | 934.97  | -15.088 |
| P13929 ENOB_HUMAN Beta-enolase                       | 5  |                       | TAIQAAGYPDK                     | 228 | 11 | 5  | 29.45 | y3*y3y7y8*y8                 | 1134.56 | 74.455  | 2976   | 2 | 567.78  | -17.645 |
| P13929 ENOB_HUMAN Beta-enolase                       | 6  |                       | VDFKMIELDG TENK                 | 89  | 14 | 8  | 52.81 | b4b7*b7b10*b10b13y7y10       | 1638.79 | 60.061  | 18815  | 2 | 819.90  | -9.013  |
| P13929 ENOB_HUMAN Beta-enolase                       | 7  |                       | YDLDFKSPDDPAR                   | 256 | 13 | 5  | 23.72 | b6*b6b7*b7y11                | 1538.69 | 37.636  | 15461  | 2 | 769.85  | -12.693 |
| P13929 ENOB_HUMAN Beta-enolase                       | 8  |                       | FMIELDG TENKSK                  | 92  | 13 | 4  | 27.21 | b5b10y10y12                  | 1511.75 | 136.558 | 6005   | 1 | 1511.75 | 2.745   |
| P13929 ENOB_HUMAN Beta-enolase                       | 9  | Oxidation+M(20)       | LAMQEFMILPVGASSFKEAMR           | 162 | 21 | 3  | 19.43 | b4b8b16                      | 2372.17 | 92.378  | 2985   | 3 | 791.39  | -6.278  |
| P13929 ENOB_HUMAN Beta-enolase                       | 10 | Oxidation+M(10)       | LAQSNWGWVMVSHR                  | 358 | 14 | 6  | 36.14 | b4*b4*b4y10y11y12            | 1557.75 | 55.166  | 2523   | 2 | 779.38  | -4.153  |
| P13929 ENOB_HUMAN Beta-enolase                       | 11 |                       | VVIGMDVAASE                     | 239 | 11 | 0  | 4.32  |                              | 1090.55 | 67.083  | 2417   | 2 | 545.78  | 6.828   |
| P17066 HSP76_HUMAN Heat shock 70 kDa protein 6       | 1  |                       | FADTTVQSDMK                     | 79  | 11 | 10 | 59.82 | b3b8y1y2y4y5*y5y6y10y11      | 1242.55 | 68.085  | 197798 | 3 | 414.86  | -12.870 |
| P17066 HSP76_HUMAN Heat shock 70 kDa protein 6       | 2  |                       | VEILANDQG NR                    | 27  | 11 | 8  | 66.81 | b3y4y6*y6y7y8y9y11           | 1228.63 | 36.321  | 66077  | 2 | 614.82  | -0.894  |
| P17066 HSP76_HUMAN Heat shock 70 kDa protein 6       | 3  |                       | TTPSYVAFTDTER                   | 38  | 13 | 12 | 71.77 | b1*b1b5*b5b9y1y3y5y6y9y11y13 | 1487.71 | 55.116  | 52107  | 2 | 744.36  | 5.580   |
| P17066 HSP76_HUMAN Heat shock 70 kDa protein 6       | 4  |                       | SQAALNPHNTVFDKAK                | 58  | 15 | 10 | 54.28 | b6*b6b10b12*b12b13y2y5y9y13  | 1612.81 | 59.460  | 39723  | 2 | 806.91  | 4.314   |
| P17066 HSP76_HUMAN Heat shock 70 kDa protein 6       | 5  |                       | AEDEAQRDR                       | 528 | 9  | 4  | 28.49 | b5b7y6y9                     | 1089.51 | 25.472  | 3464   | 2 | 545.26  | 13.893  |
| P17066 HSP76_HUMAN Heat shock 70 kDa protein 6       | 6  | Carbamidomethyl+C(5)  | FEELCSDLFR                      | 303 | 10 | 3  | 31.98 | y4y5y8                       | 1315.58 | 62.891  | 2488   | 3 | 439.20  | -11.413 |
| P17066 HSP76_HUMAN Heat shock 70 kDa protein 6       | 7  |                       | ATAGDTHLGGEDFDNR                | 222 | 16 | 4  | 15.7  | b5*b5y6y13                   | 1675.74 | 39.397  | 1761   | 2 | 838.37  | 6.483   |
| P17066 HSP76_HUMAN Heat shock 70 kDa protein 6       | 8  | Carbamidomethyl+C(13) | LYGGPGVPGSSCGTQAR               | 611 | 18 | 4  | 19.66 | b8b14y13y16                  | 1720.80 | 60.830  | 78095  | 3 | 574.27  | -4.540  |
| P17066 HSP76_HUMAN Heat shock 70 kDa protein 6       | 9  |                       | TLSSSTQATLEIDSLFEGVDFYTSI TRAR  | 274 | 29 | 5  | 11.05 | b8b14*b14y13*y13             | 3208.61 | 86.444  | 226487 | 3 | 1070.21 | 2.891   |
| P17066 HSP76_HUMAN Heat shock 70 kDa protein 6       | 10 | Carbamidomethyl+C(19) | MQAPRELAVIDLGTYSYCVGVF QQGR     | 0   | 27 | 7  | 13.93 | b8*b8b10*b10y4y10*y10        | 2953.48 | 105.721 | 38494  | 3 | 985.16  | 3.472   |
| P17066 HSP76_HUMAN Heat shock 70 kDa protein 6       | 11 | Carbamidomethyl+C(13) | LYGGPGVPGSSCGTQARQGDPS TGPIIEVD | 611 | 32 | 7  | 24.73 | b6b11y7y8*y8y12y14           | 3158.51 | 67.664  | 8429   | 4 | 790.38  | 12.986  |
| P17066 HSP76_HUMAN Heat shock 70 kDa protein 6       | 12 | Carbamidomethyl+C(1)  | CREVLAWLEHNQLAEK                | 575 | 16 | 6  | 25.44 | b4*b4b7b12*b12y11            | 1995.99 | 93.623  | 7710   | 3 | 666.00  | -8.012  |

|                                                         |    |                       |                                    |     |    |    |       |                              |         |         |        |   |         |         |
|---------------------------------------------------------|----|-----------------------|------------------------------------|-----|----|----|-------|------------------------------|---------|---------|--------|---|---------|---------|
| IP17066[HSP76_HUMAN Heat shock 70 kDa protein 6         | 13 |                       | FADTTVQSDMKHWPFR                   | 79  | 16 | 5  | 25.44 | b4°b4b7b11y15                | 1965.95 | 59.512  | 7393   | 3 | 655.99  | 10.059  |
| IP17066[HSP76_HUMAN Heat shock 70 kDa protein 6         | 14 |                       | TFYPEEISSMVLKMK                    | 114 | 16 | 3  | 24.07 | b4b5b12                      | 1889.93 | 81.276  | 6638   | 2 | 945.47  | -6.330  |
| IP17066[HSP76_HUMAN Heat shock 70 kDa protein 6         | 15 | Carbamidomethyl+C(7)  | RELEQICRPIFSR                      | 598 | 13 | 6  | 39.87 | b4b7y3°y3y10y12              | 1703.92 | 75.297  | 5146   | 3 | 568.64  | 10.746  |
| IP17066[HSP76_HUMAN Heat shock 70 kDa protein 6         | 16 | Carbamidomethyl+C(5)  | FEELCSDLFRSTLEPVEK                 | 303 | 18 | 3  | 23.19 | y5y6y13                      | 2199.09 | 104.666 | 4798   | 3 | 733.70  | 12.434  |
| IP17066[HSP76_HUMAN Heat shock 70 kDa protein 6         | 17 |                       | RTLSSSTQATLEIDSLFEGVDFYTS ITR      | 273 | 28 | 9  | 36.33 | b13°b13b15y8°y8y11y12y13°y13 | 3137.52 | 80.105  | 4521   | 3 | 1046.51 | -13.306 |
| IP17066[HSP76_HUMAN Heat shock 70 kDa protein 6         | 18 |                       | GEDKTFYPEEISSMVLK                  | 110 | 18 | 8  | 47.44 | b4b6b10b11y7°y7y11y12        | 2059.99 | 116.312 | 2391   | 2 | 1030.50 | 0.119   |
| IP17066[HSP76_HUMAN Heat shock 70 kDa protein 6         | 19 |                       | DAGAIAGLNVLRINEPTAAAIAYG LDR       | 161 | 28 | 4  | 11.15 | b6b14°b14y5                  | 2838.52 | 136.459 | 2043   | 3 | 946.85  | -9.289  |
| IP17066[HSP76_HUMAN Heat shock 70 kDa protein 6         | 20 |                       | LLQDFFNKGELNK                      | 350 | 13 | 4  | 23.72 | b3b4y10*y10                  | 1565.84 | 66.435  | 1884   | 2 | 783.43  | 7.328   |
| IP17066[HSP76_HUMAN Heat shock 70 kDa protein 6         | 21 | Phosphoryl STY(10)    | SINPDEAVAYGA AVQA AVMGDK           | 363 | 23 | 5  | 22.1  | b5b8b9y4°y4                  | 2370.12 | 81.845  | 12176  | 3 | 790.71  | 9.580   |
| IP54652[HSP72_HUMAN Heat shock-related 70 kDa protein 2 | 1  |                       | TTPSYVAFTDTER                      | 37  | 13 | 12 | 71.77 | b1°b1b5°b5b9y1y3y5y6y9y11y13 | 1487.71 | 55.116  | 52107  | 2 | 744.36  | 5.580   |
| IP54652[HSP72_HUMAN Heat shock-related 70 kDa protein 2 | 2  |                       | STAGDTHLGGEDFDNR                   | 223 | 16 | 6  | 35.14 | b1b4y8y9y10y16               | 1691.72 | 38.466  | 18315  | 3 | 564.58  | -5.123  |
| IP54652[HSP72_HUMAN Heat shock-related 70 kDa protein 2 | 3  |                       | EIAEAYLG GK                        | 129 | 10 | 6  | 37.44 | b2b8°b8y3y7y8                | 1050.54 | 69.576  | 5614   | 2 | 525.77  | -4.532  |
| IP54652[HSP72_HUMAN Heat shock-related 70 kDa protein 2 | 4  |                       | MVSHLAEFFKR                        | 239 | 11 | 3  | 22.46 | b3y5y9                       | 1346.67 | 51.611  | 1807   | 2 | 673.84  | -11.875 |
| IP54652[HSP72_HUMAN Heat shock-related 70 kDa protein 2 | 5  |                       | VHSAVITVPAYFNDSQR                  | 139 | 17 | 3  | 22.33 | y4y7y10                      | 1903.95 | 64.403  | 16850  | 2 | 952.48  | -8.207  |
| IP54652[HSP72_HUMAN Heat shock-related 70 kDa protein 2 | 6  |                       | DIGPNK                             | 254 | 6  | 1  | 12.93 | b5                           | 643.33  | 68.046  | 8125   | 1 | 643.33  | -10.151 |
| IP54652[HSP72_HUMAN Heat shock-related 70 kDa protein 2 | 7  |                       | QTQTFTTYSDNQSSVLVQVYEGE R          | 426 | 24 | 11 | 47.19 | b5°b5b9°b9b10y6°y6y7°y7y8°y8 | 2780.25 | 96.012  | 3790   | 3 | 927.42  | -19.757 |
| IP54652[HSP72_HUMAN Heat shock-related 70 kDa protein 2 | 8  |                       | TLSSSTQASIEIDSLYEGVDFYTSIT R       | 275 | 27 | 3  | 11.28 | b13y7y9                      | 2983.45 | 117.395 | 2788   | 4 | 746.62  | 1.146   |
| IP54652[HSP72_HUMAN Heat shock-related 70 kDa protein 2 | 9  |                       | MVQEAE R                           | 520 | 7  | 4  | 38.32 | b6y3°y3y6                    | 862.42  | 34.939  | 2719   | 1 | 862.42  | 14.225  |
| IP54652[HSP72_HUMAN Heat shock-related 70 kDa protein 2 | 10 |                       | AMTKDNNLLGK                        | 450 | 11 | 3  | 25.47 | b7b8y3                       | 1204.62 | 68.082  | 258728 | 2 | 602.82  | -9.525  |
| IP54652[HSP72_HUMAN Heat shock-related 70 kDa protein 2 | 11 |                       | IINEPTAAAIAYGLDKK                  | 172 | 17 | 4  | 23.58 | y5y13y14°y14                 | 1787.97 | 64.938  | 60819  | 3 | 596.66  | -12.562 |
| IP54652[HSP72_HUMAN Heat shock-related 70 kDa protein 2 | 12 |                       | NTTIPTKQTQTFTTYSDNQSSVLVQVYEGE R   | 419 | 31 | 4  | 10.92 | b6°b6y3y15                   | 3535.67 | 94.489  | 41229  | 3 | 1179.23 | -14.362 |
| IP54652[HSP72_HUMAN Heat shock-related 70 kDa protein 2 | 13 |                       | FEELNADLFRGTLEPVEK                 | 304 | 18 | 7  | 30.49 | b8°b8b9°b9b11°b11b14         | 2107.05 | 96.000  | 13577  | 3 | 703.02  | -8.458  |
| IP54652[HSP72_HUMAN Heat shock-related 70 kDa protein 2 | 14 |                       | VQVEYKGETK                         | 103 | 10 | 4  | 26.75 | b3b4°b4y8                    | 1180.62 | 80.133  | 10853  | 2 | 590.81  | -3.722  |
| IP54652[HSP72_HUMAN Heat shock-related 70 kDa protein 2 | 15 |                       | EIAEAYLG GKVHSAVITVPAYFND SQR      | 129 | 27 | 3  | 11.28 | b8b13y12                     | 2935.48 | 119.665 | 5753   | 3 | 979.16  | -5.572  |
| IP54652[HSP72_HUMAN Heat shock-related 70 kDa protein 2 | 16 | Carbamidomethyl+C(18) | MSARGPAIGIDL GTTYSCVGVFQHGK        | 0   | 26 | 5  | 17.58 | y7y12°y12*y12y17             | 2722.32 | 76.176  | 5414   | 3 | 908.11  | -10.044 |
| IP54652[HSP72_HUMAN Heat shock-related 70 kDa protein 2 | 17 |                       | YKSEDEANR                          | 527 | 9  | 3  | 28.49 | b4y5y8                       | 1111.50 | 65.919  | 4545   | 2 | 556.25  | -4.283  |
| IP54652[HSP72_HUMAN Heat shock-related 70 kDa protein 2 | 18 | Carbamidomethyl+C(14) | GPAIGIDL GTTYSCVGVFQHGKVE IANDQGNR | 4   | 33 | 4  | 12.35 | b14b16y9y11                  | 3486.69 | 86.570  | 4496   | 5 | 698.14  | -14.774 |
| IP54652[HSP72_HUMAN Heat shock-related 70 kDa protein 2 | 19 | Carbamidomethyl+C(2)  | VCNPIISKLYQGGPGGGGGGGSG ASGGPTIEVD | 604 | 35 | 4  | 12.05 | b3b5y6y16                    | 3231.50 | 71.185  | 4409   | 2 | 1616.25 | -7.933  |
| IP54652[HSP72_HUMAN Heat shock-related 70 kDa protein 2 | 20 |                       | TFFPEEISSMVLTKMK                   | 113 | 16 | 5  | 38.68 | b4b7b9b12y14                 | 1887.95 | 99.890  | 2143   | 2 | 944.48  | -6.466  |

|                                                                         |    |                                             |                                    |     |    |    |       |                               |         |         |       |   |         |         |
|-------------------------------------------------------------------------|----|---------------------------------------------|------------------------------------|-----|----|----|-------|-------------------------------|---------|---------|-------|---|---------|---------|
| P54652 HSP72_HUMAN Heat shock-related 70 kDa protein 2                  | 21 | Phosphoryl STY(8)                           | MKEIAEAYLGGK                       | 127 | 12 | 5  | 29.65 | b7°b7b9y5y7                   | 1389.62 | 59.513  | 8666  | 3 | 463.88  | -13.967 |
| P54652 HSP72_HUMAN Heat shock-related 70 kDa protein 2                  | 22 | Phosphoryl STY(7)                           | VHSAVITVPAYFNDSQR                  | 139 | 17 | 5  | 37    | y3y9_H3PO4 y8y9y10°y10        | 1983.94 | 76.269  | 1611  | 2 | 992.47  | 8.922   |
| Q9HCU5 PREB_HUMAN Prolactin regulatory element-binding protein          | 1  |                                             | GPELLGSHETALFVAVDSR                | 357 | 20 | 10 | 42.27 | b2b8b9°b9b11°b11b14y3y4°y4    | 2085.09 | 95.997  | 6831  | 2 | 1043.05 | 14.285  |
| Q9HCU5 PREB_HUMAN Prolactin regulatory element-binding protein          | 2  |                                             | DQLVTQLHWQENGPTFSSTPYR             | 224 | 22 | 3  | 12.43 | b11y4y10                      | 2604.22 | 103.612 | 3137  | 3 | 868.74  | -11.437 |
| Q9HCU5 PREB_HUMAN Prolactin regulatory element-binding protein          | 3  |                                             | VENLQAVQTDFFSSDPLQK                | 140 | 18 | 6  | 14.27 | b1b11°b11b13y2y15             | 2019.03 | 70.996  | 2432  | 4 | 505.51  | 12.999  |
| Q9HCU5 PREB_HUMAN Prolactin regulatory element-binding protein          | 4  |                                             | LVTVGR                             | 209 | 6  | 1  | 12.93 | b5                            | 644.40  | 60.869  | 9925  | 1 | 644.40  | -11.934 |
| Q9HCU5 PREB_HUMAN Prolactin regulatory element-binding protein          | 5  |                                             | FGQVPDQPAGLR                       | 251 | 12 | 4  | 24.49 | b9°b9b10y3                    | 1284.68 | 65.763  | 9349  | 2 | 642.84  | 5.986   |
| Q9HCU5 PREB_HUMAN Prolactin regulatory element-binding protein          | 6  | Carbamidomethyl+C(20)                       | ATMNLALAGDILAAGQDAHCQLLR           | 70  | 24 | 10 | 39.7  | b4b5b18°b18y6°y6y7y11°y11y17  | 2523.26 | 99.851  | 7637  | 2 | 1262.13 | -7.837  |
| Q9HCU5 PREB_HUMAN Prolactin regulatory element-binding protein          | 7  | Carbamidomethyl+C(5)                        | QPPPCYLTAWDGSNFLPLR                | 275 | 19 | 5  | 39.75 | b5b7b8b10b12                  | 2232.10 | 106.352 | 2945  | 2 | 1116.55 | 3.281   |
| Q9HCU5 PREB_HUMAN Prolactin regulatory element-binding protein          | 8  |                                             | AHEGEIEDLALGPDGK                   | 193 | 16 | 5  | 22.03 | b7b10°b10y3y9                 | 1650.83 | 55.075  | 2063  | 2 | 825.92  | 17.599  |
| Q9HCU5 PREB_HUMAN Prolactin regulatory element-binding protein          | 9  | Carbamidomethyl+C(2)                        | KCGAETQHEGLELR                     | 126 | 14 | 4  | 17.67 | b5y4y13°y13                   | 1627.78 | 136.615 | 8036  | 1 | 1627.78 | -1.425  |
| Q9HCU5 PREB_HUMAN Prolactin regulatory element-binding protein          | 10 |                                             | FQAHQQQGNKAEK                      | 94  | 13 | 5  | 27.21 | b3°b3b5y7y12                  | 1513.74 | 71.896  | 2755  | 2 | 757.37  | -6.209  |
| Q9HCU5 PREB_HUMAN Prolactin regulatory element-binding protein          | 11 |                                             | AGSKEQGPR                          | 107 | 9  | 4  | 28.49 | b5°b5b8y5                     | 929.49  | 44.214  | 2010  | 2 | 465.25  | 7.420   |
| Q9HCU5 PREB_HUMAN Prolactin regulatory element-binding protein          | 12 | Carbamidomethyl+C(26)                       | DQLVTQLHWQENGPTFSSTPYRYQACR        | 224 | 27 | 4  | 22.13 | b3b4b12°b12                   | 3282.57 | 90.191  | 1921  | 3 | 1094.86 | 8.107   |
| Q9HCU5 PREB_HUMAN Prolactin regulatory element-binding protein          | 13 | Phosphoryl STY(10)                          | GPELLGSHETALFVAVDSR                | 357 | 20 | 7  | 32.79 | b3b8°b8b14_HPO3<br>b14y3y8y11 | 2165.01 | 109.383 | 12643 | 2 | 1083.01 | -1.466  |
| Q9HCU5 PREB_HUMAN Prolactin regulatory element-binding protein          | 14 | Phosphoryl STY(4)                           | LSASLLHSHDTETR                     | 56  | 14 | 3  | 17.67 | b3b9y10                       | 1646.75 | 70.216  | 5388  | 3 | 549.59  | 4.151   |
| Q9HCU5 PREB_HUMAN Prolactin regulatory element-binding protein          | 15 | Carbamidomethyl+C(3);<br>Phosphoryl STY(13) | VVCFNHDNTLLATGGTDGYVR              | 158 | 21 | 6  | 22.85 | b5b12°b12b13°b13y8            | 2389.03 | 58.690  | 2389  | 2 | 1195.02 | -11.752 |
| Q9HCU5 PREB_HUMAN Prolactin regulatory element-binding protein          | 16 |                                             | QLVTQLHWQENGPTFSSTPYR              | 225 | 21 | 4  | 18.94 | b3b10b12°b12                  | 2489.20 | 103.600 | 2323  | 4 | 623.06  | -6.768  |
| Q9HCU5 PREB_HUMAN Prolactin regulatory element-binding protein          | 17 |                                             | PTFSSTPYR                          | 237 | 9  | 1  | 8.31  | b3                            | 1055.51 | 103.592 | 1611  | 1 | 1055.51 | -9.021  |
| Q13347 EIF3I_HUMAN Eukaryotic translation initiation factor 3 subunit I | 1  |                                             | QINDIQLSRDMTMFVTASK                | 189 | 19 | 9  | 57.19 | b10b11°b11y1y3y9y10y13y14     | 2198.11 | 94.294  | 6489  | 2 | 1099.56 | 8.775   |
| Q13347 EIF3I_HUMAN Eukaryotic translation initiation factor 3 subunit I | 2  | Carbamidomethyl+C(12)                       | ITSAVWGVLGECIAGHESGELNQYSAK        | 148 | 28 | 4  | 11.15 | b13y5y10y28                   | 2987.42 | 90.882  | 1583  | 2 | 1494.21 | -11.605 |
| Q13347 EIF3I_HUMAN Eukaryotic translation initiation factor 3 subunit I | 3  | Carbamidomethyl+C(2)                        | TCGFDFGGNIIMFSTDK                  | 97  | 17 | 3  | 14.93 | b13y8y11                      | 1909.81 | 70.508  | 8945  | 2 | 955.41  | -19.942 |
| Q13347 EIF3I_HUMAN Eukaryotic translation initiation factor 3 subunit I | 4  |                                             | LFDSTTLEHQK                        | 213 | 11 | 4  | 34.12 | b5y3y4y6                      | 1318.69 | 47.869  | 4814  | 3 | 440.24  | 22.125  |
| Q13347 EIF3I_HUMAN Eukaryotic translation initiation factor 3 subunit I | 5  |                                             | TERPVNSAALSPNYDHVVLGGGQEAMDVTTTSTR | 227 | 34 | 3  | 10.89 | b8b13y5                       | 3573.74 | 68.783  | 3254  | 5 | 715.55  | 3.757   |
| Q13347 EIF3I_HUMAN Eukaryotic translation initiation factor 3 subunit I | 6  |                                             | GHFGPINSVAFHPDGK                   | 282 | 16 | 7  | 49.38 | b6b7°b7b10b13b14y11           | 1679.81 | 57.964  | 3134  | 2 | 840.41  | -10.392 |

|                                                                         |    |                                             |                                   |     |    |    |       |                                         |         |         |       |   |         |         |
|-------------------------------------------------------------------------|----|---------------------------------------------|-----------------------------------|-----|----|----|-------|-----------------------------------------|---------|---------|-------|---|---------|---------|
| Q13347 EIF3L_HUMAN Eukaryotic translation initiation factor 3 subunit I | 7  |                                             | DPIVNVWYSVNGER                    | 30  | 14 | 4  | 17.67 | b5b12y7°y7                              | 1647.79 | 69.597  | 2066  | 2 | 824.40  | -13.927 |
| Q13347 EIF3L_HUMAN Eukaryotic translation initiation factor 3 subunit I | 8  | Carbamidomethyl+C(16)                       | DPSQIDNNEPYMKIPCNDISK             | 128 | 20 | 4  | 13.21 | b6°b6y7y12                              | 2365.02 | 81.737  | 5635  | 4 | 592.01  | -8.258  |
| Q13347 EIF3L_HUMAN Eukaryotic translation initiation factor 3 subunit I | 9  |                                             | FFHLAFEEEFGRVK                    | 268 | 14 | 5  | 42.12 | b3b5b8y7y8                              | 1755.90 | 58.001  | 4344  | 3 | 585.97  | 6.187   |
| Q13347 EIF3L_HUMAN Eukaryotic translation initiation factor 3 subunit I | 10 |                                             | DNTAKLFDSTTLEHQK                  | 208 | 16 | 5  | 22.03 | b4b8y10°y10y14                          | 1847.91 | 54.593  | 2660  | 2 | 924.46  | -3.501  |
| Q13347 EIF3L_HUMAN Eukaryotic translation initiation factor 3 subunit I | 11 | Carbamidomethyl+C(3); Carbamidomethyl+C(19) | IPCNDKITSAVWGPLGECIAGHESGELNQYSAK | 141 | 35 | 3  | 22.37 | b19y11y12                               | 3801.80 | 84.202  | 2132  | 4 | 951.21  | -5.715  |
| Q13347 EIF3L_HUMAN Eukaryotic translation initiation factor 3 subunit I | 12 |                                             | QINDIQLSRDMTMFVTASK               | 189 | 19 | 3  | 22.88 | b4b5b7                                  | 2198.12 | 84.466  | 2105  | 2 | 1099.57 | 12.884  |
| Q13347 EIF3L_HUMAN Eukaryotic translation initiation factor 3 subunit I | 13 |                                             | DMTMFVTASKDNTAK                   | 198 | 15 | 3  | 16.6  | b10b12y7                                | 1659.77 | 41.407  | 2019  | 2 | 830.39  | -1.545  |
| Q13347 EIF3L_HUMAN Eukaryotic translation initiation factor 3 subunit I | 14 | Phosphoryl STY(8)                           | DPIVNVWYSVNGER                    | 30  | 14 | 11 | 71.28 | b3_H3PO4<br>b3°b3b5°b5b8b12y4y5°y5*y5y6 | 1727.78 | 62.806  | 22994 | 2 | 864.40  | 8.549   |
| Q13347 EIF3L_HUMAN Eukaryotic translation initiation factor 3 subunit I | 15 | Phosphoryl STY(7)                           | EGDLLFTVAK                        | 20  | 10 | 4  | 45.22 | b4b6b9y5                                | 1172.55 | 75.335  | 1599  | 1 | 1172.55 | -0.729  |
| Q13347 EIF3L_HUMAN Eukaryotic translation initiation factor 3 subunit I | 16 | Oxidation+M(13)                             | QINDIQLSRDMTMFVTASK               | 189 | 19 | 4  | 21.48 | b5b6y8°y8                               | 2214.08 | 94.386  | 3632  | 2 | 1107.54 | -4.300  |
| Q13347 EIF3L_HUMAN Eukaryotic translation initiation factor 3 subunit I | 17 | Carbamidomethyl+C(2); Oxidation+M(12)       | TCGFDFGGNIIMFSTDK                 | 97  | 17 | 5  | 23.99 | b13y3°y3y5y7                            | 1925.82 | 49.839  | 1505  | 2 | 963.42  | -9.318  |
| Q13347 EIF3L_HUMAN Eukaryotic translation initiation factor 3 subunit I | 18 |                                             | RDMTMFVTASK                       | 197 | 11 | 2  | 7.71  | b7°b7                                   | 1286.63 | 94.305  | 2556  | 1 | 1286.63 | 4.554   |
| Q13347 EIF3L_HUMAN Eukaryotic translation initiation factor 3 subunit I | 19 |                                             | IAGHESGELNQYSAK                   | 161 | 15 | 0  | 11.05 |                                         | 1603.79 | 90.907  | 1825  | 2 | 802.40  | 11.189  |
| Q99613 EIF3C_HUMAN Eukaryotic translation initiation factor 3 subunit C | 1  |                                             | MIINEELMASLDQPTQTVVMHR            | 824 | 22 | 7  | 31.81 | b4b10b19y1y12y13y22                     | 2556.26 | 117.262 | 42977 | 3 | 852.76  | 0.669   |
| Q99613 EIF3C_HUMAN Eukaryotic translation initiation factor 3 subunit C | 2  |                                             | QGTYYGGYFRDQKGYR                  | 877 | 16 | 10 | 55.73 | b3°b3b4b5b8y3y10*y10y15y16              | 1910.85 | 54.159  | 18844 | 2 | 955.93  | -13.096 |
| Q99613 EIF3C_HUMAN Eukaryotic translation initiation factor 3 subunit C | 3  | Carbamidomethyl+C(2); Carbamidomethyl+C(6)  | TCAILCHYHHALHSR                   | 565 | 16 | 3  | 15.7  | b14y8y14                                | 1988.96 | 82.110  | 13382 | 3 | 663.66  | -4.419  |
| Q99613 EIF3C_HUMAN Eukaryotic translation initiation factor 3 subunit C | 4  |                                             | DAHALLDIQSSGR                     | 627 | 14 | 4  | 26.24 | b3b8°b8b12                              | 1496.77 | 88.459  | 7038  | 2 | 748.89  | 13.946  |
| Q99613 EIF3C_HUMAN Eukaryotic translation initiation factor 3 subunit C | 5  |                                             | YNRDFESHITSYK                     | 147 | 13 | 4  | 23.72 | b3y3°y3y4                               | 1659.75 | 94.043  | 3148  | 2 | 830.38  | -14.342 |
| Q99613 EIF3C_HUMAN Eukaryotic translation initiation factor 3 subunit C | 6  |                                             | IMQNTDPHSQEYVEHLK                 | 457 | 17 | 4  | 9.09  | b2b10y10*y10                            | 2069.00 | 42.629  | 2613  | 3 | 690.34  | 10.974  |



|                                                                         |    |                       |                                    |     |    |   |       |                        |         |         |        |   |         |         |
|-------------------------------------------------------------------------|----|-----------------------|------------------------------------|-----|----|---|-------|------------------------|---------|---------|--------|---|---------|---------|
| Q99613 EIF3C_HUMAN Eukaryotic translation initiation factor 3 subunit C | 7  |                       | ILADLEDYLNELWEDKEGK                | 108 | 19 | 6 | 22.88 | y2y7y8y11*y11*y11      | 2293.14 | 108.734 | 1623   | 3 | 765.05  | 9.156   |
| Q99613 EIF3C_HUMAN Eukaryotic translation initiation factor 3 subunit C | 8  | Carbamidomethyl+C(7)  | GTTEEVCR                           | 493 | 8  | 4 | 34.03 | b3°b3b7y3              | 951.42  | 45.859  | 216414 | 2 | 476.22  | 3.079   |
| Q99613 EIF3C_HUMAN Eukaryotic translation initiation factor 3 subunit C | 9  |                       | YIYAK                              | 553 | 5  | 2 | 24.91 | b3b4                   | 657.36  | 42.681  | 53325  | 1 | 657.36  | -1.486  |
| Q99613 EIF3C_HUMAN Eukaryotic translation initiation factor 3 subunit C | 10 |                       | DLMLMSHLQDNIQHADPPVQILY<br>NR      | 586 | 25 | 3 | 34.41 | b6b7b8                 | 2961.44 | 117.381 | 23196  | 4 | 741.11  | -11.954 |
| Q99613 EIF3C_HUMAN Eukaryotic translation initiation factor 3 subunit C | 11 |                       | TMLVR                              | 776 | 5  | 2 | 12.45 | b3°b3                  | 619.35  | 70.580  | 20629  | 1 | 619.35  | -11.037 |
| Q99613 EIF3C_HUMAN Eukaryotic translation initiation factor 3 subunit C | 12 |                       | QNPEQSADEDAEK                      | 160 | 13 | 7 | 39.87 | b5b7°b7b12y3y12°y12    | 1460.62 | 64.884  | 8597   | 3 | 487.55  | 6.686   |
| Q99613 EIF3C_HUMAN Eukaryotic translation initiation factor 3 subunit C | 13 |                       | NAMK                               | 68  | 4  | 1 | 11.97 | b3                     | 463.24  | 33.038  | 6964   | 1 | 463.24  | 4.677   |
| Q99613 EIF3C_HUMAN Eukaryotic translation initiation factor 3 subunit C | 14 | Carbamidomethyl+C(1)  | CLEEFELLGK                         | 78  | 10 | 5 | 36.65 | b4b7y3y8°y8            | 1237.60 | 69.572  | 6231   | 3 | 413.20  | -10.850 |
| Q99613 EIF3C_HUMAN Eukaryotic translation initiation factor 3 subunit C | 15 |                       | NQEQEK                             | 658 | 6  | 1 | 12.93 | b3                     | 775.36  | 86.584  | 2789   | 1 | 775.36  | 2.440   |
| Q99613 EIF3C_HUMAN Eukaryotic translation initiation factor 3 subunit C | 16 |                       | LGSLVENNER                         | 862 | 10 | 3 | 24.99 | b4y5y7                 | 1130.58 | 30.551  | 2475   | 2 | 565.79  | -3.563  |
| Q99613 EIF3C_HUMAN Eukaryotic translation initiation factor 3 subunit C | 17 |                       | FFTTGSDSESESSLGEEELVTKPVG<br>GNYGK | 3   | 30 | 6 | 32.64 | b3b6b7y4y5y14          | 3109.50 | 91.375  | 2166   | 3 | 1037.17 | 17.038  |
| Q99613 EIF3C_HUMAN Eukaryotic translation initiation factor 3 subunit C | 18 |                       | ILADLEDYLNELWEDK                   | 108 | 16 | 5 | 33.1  | b10*b10b11°b11b12      | 1978.96 | 102.776 | 1939   | 2 | 989.98  | -1.357  |
| Q99613 EIF3C_HUMAN Eukaryotic translation initiation factor 3 subunit C | 19 |                       | VWDLFPEADK                         | 764 | 10 | 5 | 24.99 | b3°b3y3y8°y8           | 1219.58 | 64.878  | 1898   | 2 | 610.29  | -19.518 |
| Q99613 EIF3C_HUMAN Eukaryotic translation initiation factor 3 subunit C | 20 | Carbamidomethyl+C(8)  | TMVQLGICAFR                        | 611 | 11 | 4 | 29.45 | b6b8b9*b9              | 1295.64 | 88.507  | 1567   | 2 | 648.32  | -18.560 |
| Q99613 EIF3C_HUMAN Eukaryotic translation initiation factor 3 subunit C | 21 |                       | ALSTLR                             | 136 | 6  | 2 | 12.93 | y3°y3                  | 660.40  | 30.193  | 1505   | 1 | 660.40  | -11.091 |
| Q99613 EIF3C_HUMAN Eukaryotic translation initiation factor 3 subunit C | 22 |                       | VFDHKQGTGGYFR                      | 872 | 14 | 8 | 46.58 | b4b11*b11b12°b12y4y5y8 | 1674.83 | 42.615  | 80276  | 3 | 558.95  | 13.848  |
| Q99613 EIF3C_HUMAN Eukaryotic translation initiation factor 3 subunit C | 23 |                       | GGYRQQSQTAY                        | 901 | 12 | 7 | 46.38 | b3y4*y4y6y7*y7y10      | 1386.66 | 58.597  | 21165  | 2 | 693.83  | 11.180  |
| Q99613 EIF3C_HUMAN Eukaryotic translation initiation factor 3 subunit C | 24 | Carbamidomethyl+C(12) | YLEEKGTTTEVCR                      | 488 | 13 | 6 | 26.43 | b4°b4b5°b5b10°b10      | 1613.74 | 45.737  | 15599  | 3 | 538.58  | -6.203  |
| Q99613 EIF3C_HUMAN Eukaryotic translation initiation factor 3 subunit C | 25 |                       | QLTPPEGSSKSEQDAENEGEDSA<br>VLMER   | 521 | 29 | 5 | 23.69 | b12b13*b13y9y12        | 3161.42 | 122.228 | 8351   | 3 | 1054.48 | -0.695  |

|                                                                         |    |                                                      |                                    |     |    |   |       |                     |         |         |        |   |         |         |
|-------------------------------------------------------------------------|----|------------------------------------------------------|------------------------------------|-----|----|---|-------|---------------------|---------|---------|--------|---|---------|---------|
| Q99613 EIF3C_HUMAN Eukaryotic translation initiation factor 3 subunit C | 26 |                                                      | SEAPSGESRK                         | 200 | 10 | 4 | 24.99 | b4y7°y7y9           | 1047.49 | 68.788  | 6642   | 2 | 524.25  | -13.635 |
| Q99613 EIF3C_HUMAN Eukaryotic translation initiation factor 3 subunit C | 27 |                                                      | SLQERNQEKEK                        | 653 | 11 | 7 | 38.89 | b3*b3b7b9°b9*b9y7   | 1388.67 | 64.930  | 2836   | 2 | 694.84  | -8.175  |
| Q99613 EIF3C_HUMAN Eukaryotic translation initiation factor 3 subunit C | 28 |                                                      | QGLTKDAHNALLDIQSSGR                | 622 | 19 | 3 | 13.7  | b9y3y12             | 2024.03 | 82.678  | 2578   | 3 | 675.35  | -11.459 |
| Q99613 EIF3C_HUMAN Eukaryotic translation initiation factor 3 subunit C | 29 |                                                      | QGTYGGYFRDQK                       | 877 | 12 | 4 | 31.71 | b5y3y4y10           | 1419.67 | 58.654  | 1815   | 2 | 710.34  | 2.580   |
| Q99613 EIF3C_HUMAN Eukaryotic translation initiation factor 3 subunit C | 30 | Oxidation+M(1)                                       | MIINEELMASLDQPTQTVVMHR             | 824 | 22 | 3 | 12.43 | b4b9y14             | 2572.23 | 81.364  | 7135   | 4 | 643.81  | -10.820 |
| Q99613 EIF3C_HUMAN Eukaryotic translation initiation factor 3 subunit C | 31 |                                                      | QGTYGGYFRDQKDG                     | 877 | 14 | 2 | 13.66 | y5y8                | 1591.73 | 54.216  | 1883   | 4 | 398.69  | 12.117  |
| P28062 PSB8_HUMAN Proteasome subunit beta type-8                        | 1  |                                                      | AIAAYATHRDSYSGGVVNMVYHMK           | 230 | 22 | 3 | 12.43 | b6b12y11            | 2471.15 | 49.217  | 4432   | 3 | 824.39  | -4.940  |
| P28062 PSB8_HUMAN Proteasome subunit beta type-8                        | 2  |                                                      | VESTDVS DLLHQYR                    | 258 | 14 | 4 | 20.2  | b10b11°b11y2        | 1661.82 | 63.426  | 2821   | 3 | 554.61  | 4.334   |
| P28062 PSB8_HUMAN Proteasome subunit beta type-8                        | 3  |                                                      | AIAAYATHRDSYSGGVVNMVYHMK<br>EDGWVK | 230 | 28 | 7 | 13.59 | b2b5b15°b15y8°y8y11 | 3185.46 | 104.735 | 2792   | 4 | 797.12  | -11.573 |
| P28062 PSB8_HUMAN Proteasome subunit beta type-8                        | 4  |                                                      | VESTDVS DLLHQYREANQ                | 258 | 18 | 4 | 23.19 | y6y11y12*y12        | 2104.01 | 101.772 | 2120   | 3 | 702.01  | 8.587   |
| P28062 PSB8_HUMAN Proteasome subunit beta type-8                        | 5  |                                                      | GMPKTEFFQSLGGDGER                  | 46  | 17 | 6 | 29.83 | b4b6b11y7y9°y9      | 1855.88 | 80.208  | 144740 | 2 | 928.45  | 10.656  |
| P28062 PSB8_HUMAN Proteasome subunit beta type-8                        | 6  | Carbamidomethyl+C(15)<br>;Carbamidomethyl+C(19)<br>) | VIEINPYLLGTMSGCAADCQYWE<br>R       | 105 | 24 | 3 | 11.85 | b13y4y9             | 2846.28 | 94.517  | 58005  | 4 | 712.32  | -6.004  |
| P28062 PSB8_HUMAN Proteasome subunit beta type-8                        | 7  | Carbamidomethyl+C(7)                                 | LLSNMCMQYR                         | 153 | 10 | 6 | 31.98 | b5°b5b7°b7b8*b8     | 1315.57 | 27.396  | 5936   | 2 | 658.29  | -20.135 |
| P28062 PSB8_HUMAN Proteasome subunit beta type-8                        | 8  |                                                      | GPGLYYVDEHGTR                      | 179 | 13 | 5 | 29.85 | b9b10b12°b12y6      | 1463.67 | 58.581  | 5036   | 2 | 732.34  | -12.677 |
| P28062 PSB8_HUMAN Proteasome subunit beta type-8                        | 9  |                                                      | GQRPEALPVAGSGR                     | 11  | 15 | 6 | 27.13 | b5*b5y4°y4y8y9      | 1481.79 | 37.520  | 2491   | 2 | 741.40  | 7.002   |
| P28062 PSB8_HUMAN Proteasome subunit beta type-8                        | 10 |                                                      | NGER                               | 141 | 4  | 2 | 11.97 | y3°y3               | 475.22  | 80.653  | 1848   | 1 | 475.22  | -7.642  |
| P28062 PSB8_HUMAN Proteasome subunit beta type-8                        | 11 |                                                      | EDGWVKVESTDVS DLLHQYR              | 252 | 20 | 4 | 20.69 | b8b10b15y12         | 2376.12 | 79.549  | 4414   | 2 | 1188.56 | -13.254 |
| P28062 PSB8_HUMAN Proteasome subunit beta type-8                        | 12 |                                                      | VESTDVS DLLHQYREANQ                | 258 | 18 | 3 | 14.27 | b3b9y8              | 2103.98 | 71.037  | 1957   | 2 | 1052.49 | -6.034  |
| P28062 PSB8_HUMAN Proteasome subunit beta type-8                        | 13 |                                                      | AIAAYATHRDSYSGGVVNMVYHMK           | 230 | 22 | 6 | 26.42 | b10b12y6y7y9*y9     | 2471.19 | 43.272  | 1539   | 3 | 824.40  | 11.065  |
| P28062 PSB8_HUMAN Proteasome subunit beta type-8                        | 14 | Phosphoryl STY(12)                                   | AIAAYATHRDSYSGGVVNMVYHMK           | 230 | 22 | 4 | 16.39 | b16b19y9y12         | 2551.09 | 75.311  | 5278   | 3 | 851.03  | -11.101 |
| P28062 PSB8_HUMAN Proteasome subunit beta type-8                        | 15 | Phosphoryl STY(10)                                   | GMPKTEFFQSLGGDGER                  | 46  | 17 | 5 | 36.23 | b4b6b8b11y9         | 1935.84 | 42.618  | 2261   | 2 | 968.42  | 8.513   |
| P28062 PSB8_HUMAN Proteasome subunit beta type-8                        | 16 | Carbamidomethyl+C(11)<br>;Oxidation+M()              | GMGLSMGSMICGWDKK                   | 163 | 16 | 3 | 15.7  | b15y6y10            | 1773.80 | 70.562  | 52704  | 2 | 887.40  | 12.112  |
| P28062 PSB8_HUMAN Proteasome subunit beta type-8                        | 17 | Oxidation+M(2)                                       | GMPKTEFFQSLGGDGER                  | 46  | 17 | 4 | 21.92 | b12b13°b13y12       | 1871.85 | 62.383  | 3392   | 2 | 936.43  | -3.848  |
| P28062 PSB8_HUMAN Proteasome subunit beta type-8                        | 18 | Oxidation+M(21)                                      | AIAAYATHRDSYSGGVVNMVYHMK<br>EDGWVK | 230 | 28 | 5 | 16    | b5b7°b7b12y8        | 3201.52 | 80.135  | 2709   | 5 | 641.11  | 10.829  |
| Q13509 TBB3_HUMAN Tubulin beta-3 chain                                  | 1  |                                                      | LAVNMVPPFR                         | 252 | 10 | 8 | 77.12 | b2y4y5y6y7y8y9y10   | 1143.63 | 72.778  | 168761 | 2 | 572.32  | -4.483  |
| Q13509 TBB3_HUMAN Tubulin beta-3 chain                                  | 2  |                                                      | IMNTFSVVPSPK                       | 162 | 12 | 7 | 57.85 | y4°y4y6y7y8y9y12    | 1319.71 | 63.743  | 106849 | 2 | 660.36  | 1.850   |

|                                        |    |                                                                                        |                                         |     |    |    |       |                             |         |         |        |   |         |         |
|----------------------------------------|----|----------------------------------------------------------------------------------------|-----------------------------------------|-----|----|----|-------|-----------------------------|---------|---------|--------|---|---------|---------|
| Q13509 TBB3_HUMAN Tubulin beta-3 chain | 3  |                                                                                        | ALTVPELTQQMFDK                          | 282 | 15 | 10 | 59.29 | y1y3y7°y7*y7y9*y9y11°y11y14 | 1691.87 | 85.950  | 31120  | 2 | 846.44  | 0.433   |
| Q13509 TBB3_HUMAN Tubulin beta-3 chain | 4  |                                                                                        | FWEVISDEHGDIPSGNYVGDSDLQLER             | 19  | 27 | 6  | 24.77 | b9y3y4y8y11y27              | 3077.41 | 118.255 | 23106  | 3 | 1026.47 | -0.793  |
| Q13509 TBB3_HUMAN Tubulin beta-3 chain | 5  |                                                                                        | MSSTFIGNSTAIQELFK                       | 362 | 17 | 8  | 38.9  | b5b8b15°b15*b15y5y10y15     | 1873.96 | 99.889  | 17910  | 2 | 937.48  | 10.162  |
| Q13509 TBB3_HUMAN Tubulin beta-3 chain | 6  |                                                                                        | GHYTEGAELVDSVLDVVR                      | 103 | 18 | 3  | 14.27 | b8y5y8                      | 1958.97 | 92.169  | 9688   | 3 | 653.66  | -5.172  |
| Q13509 TBB3_HUMAN Tubulin beta-3 chain | 7  |                                                                                        | LATPTYGDLNHLVSATMSGVTTSLR               | 216 | 25 | 7  | 14.76 | b7°b7b15y12°y12y15°y15      | 2605.27 | 109.302 | 7190   | 3 | 869.10  | -20.897 |
| Q13509 TBB3_HUMAN Tubulin beta-3 chain | 8  |                                                                                        | ISEQFTAMFR                              | 380 | 10 | 5  | 49.1  | b4b7y3y4y6                  | 1229.60 | 73.048  | 6791   | 2 | 615.30  | -2.482  |
| Q13509 TBB3_HUMAN Tubulin beta-3 chain | 9  | Carbamidomethyl+C(27);Carbamidomethyl+C(37)                                            | VSDTVVEPYNATLSIHQLVENTDETYCIDNEALYDICFR | 174 | 39 | 3  | 38.64 | y3y4y5                      | 4607.20 | 113.378 | 4136   | 4 | 1152.56 | 17.169  |
| Q13509 TBB3_HUMAN Tubulin beta-3 chain | 10 |                                                                                        | ISVYNEASSHK                             | 46  | 12 | 10 | 77.98 | b9b10y4y5y6°y6y7*y7y8°y8    | 1397.64 | 32.080  | 3385   | 2 | 699.32  | -20.001 |
| Q13509 TBB3_HUMAN Tubulin beta-3 chain | 11 | Carbamidomethyl+C(10)                                                                  | EIVHIQAGQCGNQIGAK                       | 2   | 17 | 8  | 23.99 | b4°b4b10°b10b12°b12y9*y9    | 1822.91 | 90.724  | 1969   | 4 | 456.48  | -5.491  |
| Q13509 TBB3_HUMAN Tubulin beta-3 chain | 12 |                                                                                        | VREEYPDR                                | 154 | 8  | 3  | 31.02 | b3b4y6                      | 1063.52 | 58.673  | 2340   | 2 | 532.27  | 5.854   |
| P05106 ITB3_HUMAN Integrin beta-3      | 1  |                                                                                        | VLEDRPLSDK                              | 88  | 10 | 8  | 40.45 | b1b2b4y7y8°y8y9y10          | 1171.65 | 26.601  | 102856 | 3 | 391.22  | 13.545  |
| P05106 ITB3_HUMAN Integrin beta-3      | 2  |                                                                                        | NDASHLLVFTTDAK                          | 265 | 14 | 12 | 74.7  | b2b3b4b6b7°b7b8y2y3y4y7y14  | 1531.76 | 63.365  | 56048  | 3 | 511.26  | -12.830 |
| P05106 ITB3_HUMAN Integrin beta-3      | 3  | Carbamidomethyl+C(3)                                                                   | DNCAPESEIEFPVSEAR                       | 72  | 16 | 4  | 32.84 | y3y5y6y12                   | 1820.83 | 63.688  | 45509  | 2 | 910.92  | 7.710   |
| P05106 ITB3_HUMAN Integrin beta-3      | 4  | Carbamidomethyl+C(4);Carbamidomethyl+C(12)                                             | TDTCMSNGLLCSGR                          | 589 | 15 | 9  | 47.73 | b3b11y3y4°y4y5°y5y8y15      | 1658.70 | 48.798  | 37400  | 2 | 829.85  | 2.797   |
| P05106 ITB3_HUMAN Integrin beta-3      | 5  |                                                                                        | EATSTFTNITYR                            | 774 | 12 | 7  | 46.38 | b4y3y6*y6y8y9y12            | 1403.68 | 53.510  | 33242  | 2 | 702.35  | 1.913   |
| P05106 ITB3_HUMAN Integrin beta-3      | 6  | Carbamidomethyl+C(2);Carbamidomethyl+C(4);Carbamidomethyl+C(9)                         | YCECDFSCVR                              | 545 | 11 | 5  | 47.92 | y5y6y8y9y11                 | 1510.55 | 45.377  | 32190  | 2 | 755.78  | 7.192   |
| P05106 ITB3_HUMAN Integrin beta-3      | 7  | Carbamidomethyl+C(3);Carbamidomethyl+C(5);Carbamidomethyl+C(8);Carbamidomethyl+C(10)   | GECLCGQCVCHSSDFGK                       | 524 | 17 | 10 | 86.81 | b2b3y2y3y4y6y8y10y12y14     | 2000.79 | 39.716  | 15440  | 2 | 1000.90 | 9.030   |
| P05106 ITB3_HUMAN Integrin beta-3      | 8  | Carbamidomethyl+C(1);Carbamidomethyl+C(10);Carbamidomethyl+C(12);Carbamidomethyl+C(25) | CGPGWLGSQCECSEEDYRPSQQDECSFR            | 487 | 28 | 4  | 11.15 | b6y5y9y28                   | 3374.35 | 53.263  | 14819  | 3 | 1125.45 | 7.308   |
| P05106 ITB3_HUMAN Integrin beta-3      | 9  |                                                                                        | LRPDDSK                                 | 117 | 7  | 5  | 38.32 | b6y3°y3y6y7                 | 830.45  | 34.904  | 9748   | 1 | 830.45  | 11.980  |
| P05106 ITB3_HUMAN Integrin beta-3      | 10 | Carbamidomethyl+C(19)                                                                  | DEIESVKELKDTGKDAVNCTYK                  | 662 | 22 | 7  | 39.48 | b10y3y6y8*y8y10y13          | 2542.25 | 93.594  | 4094   | 4 | 636.32  | 5.186   |
| P05106 ITB3_HUMAN Integrin beta-3      | 11 | Carbamidomethyl+C(18)                                                                  | NRDAPEGGFDAIMQATVCDEK                   | 240 | 21 | 6  | 27.14 | b5b11b12*b12y9y14           | 2324.05 | 72.942  | 3660   | 3 | 775.35  | 9.455   |
| P05106 ITB3_HUMAN Integrin beta-3      | 12 | Carbamidomethyl+C(27)                                                                  | IGFGAFVDKPVSPYMYISPEALENPCYDMK          | 176 | 31 | 4  | 12.76 | b3b8y9y11                   | 3535.63 | 81.826  | 9413   | 4 | 884.66  | -9.253  |
| P05106 ITB3_HUMAN Integrin beta-3      | 13 | Carbamidomethyl+C(12)                                                                  | LAGIVQPNDDGQCHVGSNDHYSASTTMDYPSLGLMTEK  | 287 | 37 | 7  | 32.74 | b3b4b12y6y10y11y13          | 3993.85 | 71.816  | 7378   | 3 | 1331.95 | 10.209  |
| P05106 ITB3_HUMAN Integrin beta-3      | 14 | Carbamidomethyl+C(3)                                                                   | TTCLPMFGYK                              | 207 | 10 | 5  | 52.11 | b6b8y6y7y8                  | 1217.59 | 39.559  | 2828   | 2 | 609.30  | 20.052  |

|                                   |    |                                                                                                       |                                       |     |    |    |       |                                                                         |         |         |        |   |         |         |
|-----------------------------------|----|-------------------------------------------------------------------------------------------------------|---------------------------------------|-----|----|----|-------|-------------------------------------------------------------------------|---------|---------|--------|---|---------|---------|
| P05106 ITB3_HUMAN Integrin beta-3 | 15 | Carbamidomethyl+C(6)                                                                                  | EGQPVCQSQR                            | 515 | 9  | 8  | 70.62 | b3y3 <sup>3</sup> y3y4y5y7*y7y8                                         | 1060.47 | 87.402  | 2582   | 1 | 1060.47 | -10.245 |
| P05106 ITB3_HUMAN Integrin beta-3 | 16 |                                                                                                       | IGDTVSFSIEAKVR                        | 416 | 14 | 6  | 39.26 | b6 <sup>6</sup> b6y6y8y11y12                                            | 1521.85 | 92.543  | 308659 | 2 | 761.43  | 13.636  |
| P05106 ITB3_HUMAN Integrin beta-3 | 17 |                                                                                                       | VLEDRPLSDKSGSDSSQVTQVSPQR             | 88  | 25 | 17 | 96.69 | b5b9b10b17 <sup>7</sup> b17b18b20y3*y3y4 <sup>4</sup> y4*y4y5y6*y6y7y15 | 2685.32 | 40.108  | 74890  | 4 | 672.09  | -7.455  |
| P05106 ITB3_HUMAN Integrin beta-3 | 18 |                                                                                                       | DDLWSIQNLGTKLATQMR                    | 151 | 18 | 4  | 19.66 | b6b9y3y5                                                                | 2090.07 | 54.178  | 6241   | 2 | 1045.54 | -0.935  |
| P05106 ITB3_HUMAN Integrin beta-3 | 19 |                                                                                                       | AKWDTANNPLYK                          | 762 | 12 | 7  | 42.38 | b3b7b8 <sup>8</sup> b8*b8b11*b11                                        | 1420.73 | 44.151  | 4233   | 3 | 474.25  | 8.850   |
| P05106 ITB3_HUMAN Integrin beta-3 | 20 | Carbamidomethyl+C(16)                                                                                 | DAPEGGFDAIMQATVCDEKIGWR               | 242 | 23 | 4  | 22.1  | b3b9b10y12                                                              | 2566.14 | 103.563 | 3692   | 4 | 642.29  | -13.605 |
| P05106 ITB3_HUMAN Integrin beta-3 | 21 | Carbamidomethyl+C(3)                                                                                  | TTCLPMFGYKHVLTLDQVTR                  | 207 | 21 | 4  | 12.79 | b5 <sup>5</sup> b5b12y6                                                 | 2481.23 | 105.702 | 3592   | 3 | 827.75  | -12.988 |
| P05106 ITB3_HUMAN Integrin beta-3 | 22 | Carbamidomethyl+C(18)                                                                                 | NRDAPEGGFDAIMQATVCDEK                 | 240 | 21 | 3  | 12.79 | b4y6y19                                                                 | 2324.03 | 105.322 | 3144   | 3 | 775.35  | 2.731   |
| P05106 ITB3_HUMAN Integrin beta-3 | 23 | Carbamidomethyl+C(8)                                                                                  | ENLLKDNCAPIESIEFPVSEAR                | 67  | 21 | 9  | 42.92 | b3 <sup>3</sup> b3b4 <sup>4</sup> b4b6b11y10y11y13                      | 2418.19 | 105.750 | 2301   | 4 | 605.30  | 13.428  |
| P05106 ITB3_HUMAN Integrin beta-3 | 24 |                                                                                                       | NFSIQVRQVEDYVVDIYYLMDLSYSMK           | 124 | 27 | 4  | 22.13 | y3 <sup>3</sup> y3y4y9                                                  | 3316.59 | 79.408  | 2117   | 3 | 1106.20 | -0.810  |
| P05106 ITB3_HUMAN Integrin beta-3 | 25 |                                                                                                       | EATSTFTNITYRGT                        | 774 | 14 | 3  | 17.67 | b10b12y10                                                               | 1561.73 | 56.663  | 1680   | 2 | 781.37  | -13.522 |
| P05106 ITB3_HUMAN Integrin beta-3 | 26 | Carbamidomethyl+C(4)                                                                                  | VRGCPQEK                              | 428 | 8  | 3  | 34.03 | b7y4y6                                                                  | 973.48  | 47.230  | 1575   | 2 | 487.24  | -10.471 |
| P05106 ITB3_HUMAN Integrin beta-3 | 27 | Carbamidomethyl+C(12);Oxidation+M(34)                                                                 | LAGIVQPNDGQCHVGSDNHYSASTTMDYPSLGLMTEK | 287 | 37 | 3  | 11    | b10y8y11                                                                | 4009.85 | 115.374 | 18876  | 4 | 1003.22 | 12.116  |
| P05106 ITB3_HUMAN Integrin beta-3 | 28 | Carbamidomethyl+C(5);Carbamidomethyl+C(8);Carbamidomethyl+C(15);Carbamidomethyl+C(18);Oxidation+M(14) | GVSSCQQCLAVSPMCAWCSDEALPLGSPR         | 34  | 29 | 5  | 46.77 | b11b12b13b14y14                                                         | 3239.44 | 101.579 | 5642   | 3 | 1080.48 | 9.421   |
| P05106 ITB3_HUMAN Integrin beta-3 | 29 | Oxidation+M(19)                                                                                       | QVEDYVVDIYYLMDLSYSMK                  | 131 | 20 | 10 | 45.5  | b3b7 <sup>7</sup> b7b8y4 <sup>4</sup> y4y6 <sup>6</sup> y6y10y15        | 2488.11 | 75.292  | 2881   | 2 | 1244.56 | -7.752  |
| P05106 ITB3_HUMAN Integrin beta-3 | 30 | Carbamidomethyl+C(18);Oxidation+M(13)                                                                 | NRDAPEGGFDAIMQATVCDEK                 | 240 | 21 | 7  | 32.86 | b3b8b9b15y6y11*y11                                                      | 2340.03 | 109.321 | 1754   | 3 | 780.68  | 4.591   |
| Q9H501 ESF1_HUMAN ESF1 homolog    | 1  |                                                                                                       | FQAMYTSHLFLNLDPSDPNFK                 | 761 | 20 | 5  | 13.21 | b10y1y8*y8y15                                                           | 2372.09 | 70.632  | 27748  | 4 | 593.78  | -6.484  |
| Q9H501 ESF1_HUMAN ESF1 homolog    | 2  |                                                                                                       | FWEMPEKDR                             | 21  | 9  | 3  | 36.27 | y3y4y6                                                                  | 1237.56 | 64.623  | 11979  | 2 | 619.28  | -4.735  |
| Q9H501 ESF1_HUMAN ESF1 homolog    | 3  |                                                                                                       | DVASEVNLTAYKPK                        | 481 | 14 | 4  | 29.15 | b3b6b10y3                                                               | 1534.81 | 58.685  | 7886   | 3 | 512.28  | -0.318  |
| Q9H501 ESF1_HUMAN ESF1 homolog    | 4  |                                                                                                       | LTPWEQFLEK                            | 628 | 10 | 6  | 45.22 | b5b7b9 <sup>9</sup> b9y9*y9                                             | 1290.66 | 68.080  | 7352   | 2 | 645.83  | -9.836  |
| Q9H501 ESF1_HUMAN ESF1 homolog    | 5  |                                                                                                       | GRPISHSTTEDLKR                        | 56  | 14 | 3  | 26.24 | b3b7b10                                                                 | 1596.86 | 66.403  | 5957   | 3 | 532.96  | 6.498   |
| Q9H501 ESF1_HUMAN ESF1 homolog    | 6  |                                                                                                       | GNIETSSSEDEDDTADLFPEESGFHAWR          | 306 | 28 | 10 | 37.51 | b7b28y4y5 <sup>5</sup> y5y7 <sup>7</sup> y7y11 <sup>11</sup> y11y12     | 3183.34 | 97.967  | 3851   | 4 | 796.59  | 3.681   |
| Q9H501 ESF1_HUMAN ESF1 homolog    | 7  |                                                                                                       | GKENDMEMEIK                           | 595 | 11 | 11 | 69.82 | b1b5b11 <sup>11</sup> *b11y2y3y5 <sup>5</sup> y5y7y8y9                  | 1323.61 | 34.950  | 3321   | 2 | 662.31  | 11.621  |
| Q9H501 ESF1_HUMAN ESF1 homolog    | 8  |                                                                                                       | EEQVQGPVELLSIPEDAPEKDWTSREK           | 395 | 27 | 5  | 11.28 | b2b5b12y2y12                                                            | 3109.50 | 80.084  | 3158   | 3 | 1037.17 | -10.207 |
| Q9H501 ESF1_HUMAN ESF1 homolog    | 9  | Carbamidomethyl+C(4)                                                                                  | LAVCNMDWDR                            | 349 | 10 | 8  | 61.56 | b4b8 <sup>8</sup> *b8b9y3y8y9*y9                                        | 1279.57 | 34.991  | 2720   | 2 | 640.29  | 13.738  |
| Q9H501 ESF1_HUMAN ESF1 homolog    | 10 |                                                                                                       | MKEEQVQGPVELLSIPEDAPEKDWTSREK         | 393 | 29 | 3  | 22.24 | b6b9b10                                                                 | 3368.68 | 90.268  | 2379   | 3 | 1123.57 | 4.711   |

|                                                |    |                       |                             |     |    |    |       |                                |         |         |       |   |         |         |
|------------------------------------------------|----|-----------------------|-----------------------------|-----|----|----|-------|--------------------------------|---------|---------|-------|---|---------|---------|
| Q9H501 ESF1_HUMAN ESF1 homolog                 | 11 |                       | YFTSAAMGTSTVEITWDETDHER     | 495 | 23 | 8  | 30.68 | b7b12y4°y4y6y7°y7y9            | 2647.11 | 125.075 | 17837 | 3 | 883.04  | -18.353 |
| Q9H501 ESF1_HUMAN ESF1 homolog                 | 12 |                       | IDSNSPK                     | 147 | 8  | 3  | 31.02 | b4b5y3                         | 873.46  | 50.510  | 14661 | 1 | 873.46  | -10.272 |
| Q9H501 ESF1_HUMAN ESF1 homolog                 | 13 | Carbamidomethyl+C(8)  | YYYAVVDCDSPETASK            | 432 | 16 | 3  | 15.7  | b4y4y9                         | 1867.80 | 45.860  | 8925  | 4 | 467.71  | -0.588  |
| Q9H501 ESF1_HUMAN ESF1 homolog                 | 14 |                       | ELIEDDFEVNVNDAR             | 746 | 15 | 7  | 34.02 | b4b10y5*y5y9y10°y10            | 1777.85 | 72.475  | 7671  | 2 | 889.43  | 14.625  |
| Q9H501 ESF1_HUMAN ESF1 homolog                 | 15 |                       | EEQVQGPVELLSIPEDAPEK        | 395 | 20 | 5  | 20.69 | b4°b4b6b10y7                   | 2207.10 | 95.975  | 2716  | 3 | 736.37  | -5.310  |
| Q9H501 ESF1_HUMAN ESF1 homolog                 | 16 |                       | FIPDDITFDDEPK               | 468 | 13 | 11 | 58.35 | b5°b5b8°b8y4°y4y8°y8y10y12°y12 | 1551.71 | 65.875  | 2695  | 2 | 776.36  | -4.641  |
| Q9H501 ESF1_HUMAN ESF1 homolog                 | 17 |                       | AMFHDK                      | 39  | 6  | 1  | 12.93 | y5                             | 748.34  | 36.430  | 2669  | 1 | 748.34  | -9.543  |
| Q9H501 ESF1_HUMAN ESF1 homolog                 | 18 |                       | TEQFQAR                     | 838 | 7  | 4  | 35.31 | b6y5y6*y6                      | 879.43  | 32.070  | 2214  | 2 | 440.22  | -2.013  |
| Q9H501 ESF1_HUMAN ESF1 homolog                 | 19 |                       | DGTSPEEEIEIER               | 690 | 13 | 3  | 18.95 | b9y4y8                         | 1503.69 | 38.568  | 2026  | 2 | 752.35  | 6.089   |
| Q9H501 ESF1_HUMAN ESF1 homolog                 | 20 |                       | TLDSGTSEIVK                 | 186 | 11 | 4  | 25.47 | b4b5°b5y9                      | 1149.58 | 71.880  | 1585  | 2 | 575.30  | -13.061 |
| Q9H501 ESF1_HUMAN ESF1 homolog                 | 21 |                       | DGTSPEEEIEIERQK             | 690 | 15 | 5  | 16.6  | b3°b3b5y13*y13                 | 1759.82 | 110.776 | 31524 | 2 | 880.41  | -8.532  |
| Q9H501 ESF1_HUMAN ESF1 homolog                 | 22 | Carbamidomethyl+C(10) | LKYYYAVVDCDSPETASK          | 430 | 18 | 5  | 29.9  | b10b13y7y13y14                 | 2108.98 | 108.157 | 24361 | 3 | 703.67  | -0.579  |
| Q9H501 ESF1_HUMAN ESF1 homolog                 | 23 |                       | ANHKGSENK                   | 119 | 9  | 4  | 28.49 | b7b8*b8y8                      | 984.49  | 32.479  | 20401 | 2 | 492.75  | 0.868   |
| Q9H501 ESF1_HUMAN ESF1 homolog                 | 24 |                       | KNIVQHTTDSLEEK              | 169 | 15 | 3  | 16.6  | b13y3y8                        | 1728.87 | 91.356  | 12892 | 3 | 576.96  | -6.002  |
| Q9H501 ESF1_HUMAN ESF1 homolog                 | 25 |                       | GSENKTDLDSIGIK              | 123 | 15 | 4  | 33.13 | b5*b5b6b7                      | 1590.78 | 31.584  | 5349  | 4 | 398.45  | -12.815 |
| Q9H501 ESF1_HUMAN ESF1 homolog                 | 26 |                       | MSSKQEIMSDQR                | 0   | 12 | 3  | 24.49 | b8y8y9                         | 1439.68 | 136.494 | 2835  | 1 | 1439.68 | 9.666   |
| Q9H501 ESF1_HUMAN ESF1 homolog                 | 27 |                       | ESAEEMVKNK                  | 612 | 10 | 3  | 26.75 | b8b9y8                         | 1164.55 | 30.201  | 2667  | 3 | 388.85  | -6.499  |
| Q9H501 ESF1_HUMAN ESF1 homolog                 | 28 | Carbamidomethyl+C(4)  | LAVCNMDWDRLK                | 349 | 12 | 7  | 40.86 | b4b6*b6y7°y7y8y11              | 1520.73 | 90.759  | 2085  | 2 | 760.87  | -1.044  |
| Q9H501 ESF1_HUMAN ESF1 homolog                 | 29 |                       | MKEEQVQGPVELLSIPEDAPEK      | 393 | 22 | 8  | 33.08 | b5b7b11°b11y5y6y9°y9           | 2466.22 | 95.541  | 1596  | 3 | 822.75  | -8.810  |
| Q9H501 ESF1_HUMAN ESF1 homolog                 | 30 |                       | QEIMSDQRFR                  | 4   | 10 | 3  | 26.75 | b5y7y8                         | 1309.65 | 84.886  | 1583  | 2 | 655.33  | 10.533  |
| Q9H501 ESF1_HUMAN ESF1 homolog                 | 31 | Phosphoryl STY(14)    | MKEEQVQGPVELLSIPEDAPEK      | 393 | 22 | 12 | 62.46 | b3b6°b6*b6b9y3y6y7°y7y8y12y13  | 2546.17 | 99.847  | 22383 | 4 | 637.30  | -11.219 |
| Q9H501 ESF1_HUMAN ESF1 homolog                 | 32 | Phosphoryl STY(6)     | FQAMYTSHLFNLDPSDPNFKK       | 761 | 21 | 3  | 21.24 | b12y15y16                      | 2580.18 | 99.844  | 2730  | 4 | 645.80  | 11.071  |
| Q9H501 ESF1_HUMAN ESF1 homolog                 | 33 | Oxidation+M(1)        | MKEEQVQGPVELLSIPEDAPEKDWTSR | 393 | 27 | 4  | 21.16 | b3b6b7y12                      | 3127.51 | 89.683  | 2594  | 3 | 1043.18 | -4.450  |
| Q9H501 ESF1_HUMAN ESF1 homolog                 | 34 | Oxidation+M(4)        | FQAMYTSHLFNLDPSDPNFK        | 761 | 20 | 4  | 13.21 | b9y7y9°y9                      | 2388.11 | 85.570  | 2508  | 3 | 796.71  | 6.441   |
| Q9H501 ESF1_HUMAN ESF1 homolog                 | 35 |                       | RPISHSTEDLKR                | 57  | 13 | 1  | 7.23  | b6                             | 1539.83 | 66.401  | 1654  | 4 | 385.71  | 6.184   |
| P08107 HSP71_HUMAN Heat shock 70 kDa protein 1 | 1  |                       | TTPSYVAFTDTER               | 36  | 13 | 12 | 71.77 | b1°b1b5°b5b9y1y3y5y6y9y11y13   | 1487.71 | 55.116  | 52107 | 2 | 744.36  | 5.580   |
| P08107 HSP71_HUMAN Heat shock 70 kDa protein 1 | 2  | Carbamidomethyl+C(5)  | FEELCSDLFR                  | 301 | 10 | 3  | 31.98 | y4y5y8                         | 1315.58 | 62.891  | 2488  | 3 | 439.20  | -11.413 |
| P08107 HSP71_HUMAN Heat shock 70 kDa protein 1 | 3  |                       | ATAGDTHLGGEDFDNR            | 220 | 16 | 4  | 15.7  | b5°b5y6y13                     | 1675.74 | 39.397  | 1761  | 2 | 838.37  | 6.483   |
| P08107 HSP71_HUMAN Heat shock 70 kDa protein 1 | 4  | Carbamidomethyl+C(14) | AAAIGIDLGTYSYCVGFQHGK       | 3   | 22 | 3  | 12.43 | b11y5y11                       | 2265.09 | 77.008  | 10133 | 3 | 755.70  | -19.185 |

|                                                             |    |                       |                                 |     |    |    |       |                                            |         |         |        |   |         |         |
|-------------------------------------------------------------|----|-----------------------|---------------------------------|-----|----|----|-------|--------------------------------------------|---------|---------|--------|---|---------|---------|
| P08107 HSP71_HUMAN Heat shock 70 kDa protein 1              | 5  |                       | NQVALNPQNTVFDKAK                | 56  | 15 | 6  | 43.85 | b6y3°y3y4y7y8                              | 1658.87 | 69.663  | 6217   | 2 | 829.94  | 10.891  |
| P08107 HSP71_HUMAN Heat shock 70 kDa protein 1              | 6  | Carbamidomethyl+C(1)  | CQEVISWLDANTLAEK                | 573 | 16 | 5  | 26.11 | b5b8b9y10°y10                              | 1876.92 | 57.071  | 5386   | 2 | 938.97  | 6.374   |
| P08107 HSP71_HUMAN Heat shock 70 kDa protein 1              | 7  |                       | FGDPVVQSDMK                     | 77  | 11 | 6  | 44.35 | b6°b6b9y3y4y6                              | 1222.60 | 32.105  | 3054   | 3 | 408.21  | 19.071  |
| P08107 HSP71_HUMAN Heat shock 70 kDa protein 1              | 8  |                       | VSAKNALESYAFNMK                 | 535 | 15 | 4  | 22.62 | b12y10y11*y11                              | 1672.83 | 59.123  | 27444  | 3 | 558.28  | -3.868  |
| P08107 HSP71_HUMAN Heat shock 70 kDa protein 1              | 9  |                       | DAGVIAGLNVLRINEPTAAAIAYG<br>LDR | 159 | 28 | 4  | 22.17 | y6y14*y14y15                               | 2866.55 | 75.230  | 9340   | 3 | 956.19  | -10.987 |
| P08107 HSP71_HUMAN Heat shock 70 kDa protein 1              | 10 |                       | FGDPVVQSDMKHWPQVINDGD<br>KPK    | 77  | 25 | 6  | 25.65 | y7y9y11°y11*y11y13                         | 2884.40 | 108.772 | 5542   | 3 | 962.14  | -4.740  |
| P08107 HSP71_HUMAN Heat shock 70 kDa protein 1              | 11 |                       | NALESYAFNMKSAVEDEGLK            | 539 | 20 | 5  | 25.31 | b4b11y4y7y10                               | 2216.06 | 110.734 | 1761   | 3 | 739.36  | 1.983   |
| P08107 HSP71_HUMAN Heat shock 70 kDa protein 1              | 12 |                       | KFGDPVVQSDMK                    | 76  | 12 | 4  | 33.63 | b9b10y7y11                                 | 1350.69 | 90.221  | 1677   | 3 | 450.90  | 12.111  |
| P08107 HSP71_HUMAN Heat shock 70 kDa protein 1              | 13 | Phosphoryl STY(18)    | NVLIFDLGGGTFDVSILTIDDGIFE<br>VK | 193 | 27 | 6  | 13.93 | b13*b13b21y8°y8y11                         | 2977.46 | 105.729 | 4088   | 3 | 993.16  | -4.182  |
| Q8WVQ1 CANT1_HUMAN Soluble calcium-activated nucleotidase 1 | 1  |                       | VAVEWDKDHGVLESHLAEK             | 142 | 19 | 14 | 63.38 | b3b4°b4b9b10b11y1y2y3y14°<br>y14y16°y16y19 | 2162.08 | 63.436  | 118987 | 3 | 721.37  | -2.146  |
| Q8WVQ1 CANT1_HUMAN Soluble calcium-activated nucleotidase 1 | 2  |                       | LGQAPANWYNDTYPLSPQR             | 78  | 20 | 10 | 36.08 | b1b2b12b14b15°b15y9*y9y10<br>*y10          | 2288.09 | 65.876  | 24971  | 3 | 763.37  | -9.070  |
| Q8WVQ1 CANT1_HUMAN Soluble calcium-activated nucleotidase 1 | 3  |                       | DHGVLESHLAEK                    | 149 | 12 | 4  | 24.49 | b7b8°b8y8                                  | 1334.67 | 30.490  | 3614   | 2 | 667.84  | 1.646   |
| Q8WVQ1 CANT1_HUMAN Soluble calcium-activated nucleotidase 1 | 4  |                       | GMELSDLIVFNGK                   | 163 | 13 | 5  | 28.19 | b3b8°b8b11y2                               | 1422.73 | 72.456  | 2205   | 2 | 711.87  | 3.260   |
| Q8WVQ1 CANT1_HUMAN Soluble calcium-activated nucleotidase 1 | 5  |                       | GYLTLSDSGDK                     | 131 | 11 | 7  | 47.92 | b1y2y3y7y8y10°y10                          | 1155.56 | 34.982  | 1988   | 2 | 578.29  | 10.353  |
| Q8WVQ1 CANT1_HUMAN Soluble calcium-activated nucleotidase 1 | 6  |                       | MPVQLSEHPEWNESMHSLR             | 0   | 19 | 7  | 35.57 | b5b8y7y10y12y13*y13                        | 2307.08 | 86.440  | 13806  | 3 | 769.70  | 6.561   |
| Q8WVQ1 CANT1_HUMAN Soluble calcium-activated nucleotidase 1 | 7  |                       | PVQLSEHPEWNESMHSLR              | 1   | 18 | 5  | 23.19 | b9b10*b10b12*b12                           | 2176.01 | 58.596  | 12698  | 3 | 726.01  | -4.151  |
| Q8WVQ1 CANT1_HUMAN Soluble calcium-activated nucleotidase 1 | 8  |                       | EWTTTTGDVVNENPEWVK              | 231 | 18 | 5  | 22.74 | b3b9b12y12°y12                             | 2104.94 | 69.399  | 7461   | 2 | 1052.98 | -18.441 |
| Q8WVQ1 CANT1_HUMAN Soluble calcium-activated nucleotidase 1 | 9  | Carbamidomethyl+C(17) | AAAGIQPPGYLIHESACWSDTLQR        | 270 | 24 | 6  | 34.8  | b4y6°y6y7y8y11                             | 2641.26 | 72.956  | 6414   | 3 | 881.09  | -7.580  |
| Q8WVQ1 CANT1_HUMAN Soluble calcium-activated nucleotidase 1 | 10 |                       | AVPWVILSDGDGTVEK                | 194 | 16 | 5  | 25.44 | b10y4°y4y10y13                             | 1685.86 | 95.483  | 2942   | 2 | 843.44  | -6.010  |
| Q8WVQ1 CANT1_HUMAN Soluble calcium-activated nucleotidase 1 | 11 |                       | VASYIMAFTLDGR                   | 369 | 13 | 5  | 23.72 | b11b12°b12y3°y3                            | 1443.71 | 43.771  | 1973   | 2 | 722.36  | -12.260 |
| Q8WVQ1 CANT1_HUMAN Soluble calcium-activated nucleotidase 1 | 12 |                       | GSVDHENWVSNYNALR                | 254 | 16 | 6  | 22.03 | b7°b7b10*b10y10y13                         | 1860.90 | 44.144  | 1784   | 2 | 930.95  | 20.598  |
| Q8WVQ1 CANT1_HUMAN Soluble calcium-activated nucleotidase 1 | 13 |                       | GRGMELSDLIVFNGK                 | 161 | 15 | 5  | 27.13 | b4b11b14y13°y13                            | 1635.88 | 84.491  | 21613  | 2 | 818.44  | 14.402  |

|                                                             |    |                                              |                                    |     |    |    |       |                                     |         |         |       |   |         |         |
|-------------------------------------------------------------|----|----------------------------------------------|------------------------------------|-----|----|----|-------|-------------------------------------|---------|---------|-------|---|---------|---------|
| Q8WVQ1 CANT1_HUMAN Soluble calcium-activated nucleotidase 1 | 14 |                                              | GMELSDLIVFNGKLYSVDDR               | 163 | 20 | 4  | 21.34 | b10b11°b11y13                       | 2271.12 | 61.348  | 7059  | 4 | 568.54  | -6.020  |
| Q8WVQ1 CANT1_HUMAN Soluble calcium-activated nucleotidase 1 | 15 |                                              | LGQAPANWYNDTYPLSPQRTPA<br>GIR      | 78  | 26 | 8  | 34.27 | b3*b3b7b8*b8b9y21°y21               | 2883.46 | 119.060 | 6788  | 3 | 961.82  | 1.778   |
| Q8WVQ1 CANT1_HUMAN Soluble calcium-activated nucleotidase 1 | 16 |                                              | FIPNTDDQIIVALKSEEDSGR              | 348 | 21 | 8  | 37.39 | b10y3y4°y4y10y15y17°y17             | 2347.16 | 99.841  | 3170  | 3 | 783.06  | -9.257  |
| Q8WVQ1 CANT1_HUMAN Soluble calcium-activated nucleotidase 1 | 17 | Phosphoryl STY(11)                           | LYVGGGLGKEWTTTGDVVNENP<br>EWWK     | 223 | 26 | 3  | 11.43 | b11b14y14                           | 2972.36 | 77.007  | 15345 | 3 | 991.46  | -11.828 |
| Q8WVQ1 CANT1_HUMAN Soluble calcium-activated nucleotidase 1 | 18 | Phosphoryl STY(13)                           | AVPWVILSDGDGTVEK                   | 194 | 16 | 4  | 26.11 | b3b11b12y4                          | 1765.81 | 106.411 | 2308  | 3 | 589.27  | -12.858 |
| Q8WVQ1 CANT1_HUMAN Soluble calcium-activated nucleotidase 1 | 19 | Carbamidomethyl+C(17)<br>;Phosphoryl STY(10) | AAAGIQPPGYLIHESACWSDTLQR           | 270 | 24 | 5  | 15.24 | b8b13*b13y10y14                     | 2721.25 | 76.182  | 2096  | 5 | 545.05  | 2.064   |
| Q8WVQ1 CANT1_HUMAN Soluble calcium-activated nucleotidase 1 | 20 | Oxidation+M(15)                              | MPVQLSEHPEWNESMHSLR                | 0   | 19 | 4  | 13.7  | b7°b7y3y13                          | 2323.08 | 90.644  | 2241  | 3 | 775.03  | 9.984   |
| Q8WVQ1 CANT1_HUMAN Soluble calcium-activated nucleotidase 1 | 21 |                                              | DHGVLESHLA                         | 149 | 10 | 0  | 3.36  |                                     | 1077.54 | 30.541  | 1619  | 2 | 539.27  | 6.118   |
| Q8WVQ1 CANT1_HUMAN Soluble calcium-activated nucleotidase 1 | 22 |                                              | VAVEWDKDHGVLESHLAE                 | 142 | 18 | 4  | 22.88 | y4°y4y6y7                           | 2033.97 | 63.451  | 1532  | 3 | 678.66  | -9.903  |
| P47756 CAPZB_HUMAN F-actin-capping protein subunit beta     | 1  | Carbamidomethyl+C(13)                        | NLSLDLIDLVPSCEDLLSSVDQPL<br>K      | 23  | 25 | 7  | 30.35 | b2b4b7b8y3y5y8                      | 2783.43 | 129.179 | 9204  | 3 | 928.48  | -1.579  |
| P47756 CAPZB_HUMAN F-actin-capping protein subunit beta     | 2  |                                              | SGSGTMNLGGSLTR                     | 181 | 14 | 3  | 17.67 | b4y6y12                             | 1337.65 | 36.693  | 7190  | 2 | 669.33  | 2.190   |
| P47756 CAPZB_HUMAN F-actin-capping protein subunit beta     | 3  |                                              | STLNEIYFGK                         | 225 | 10 | 4  | 45.22 | b5b7b9y7                            | 1171.58 | 33.151  | 25462 | 1 | 1171.58 | -18.963 |
| P47756 CAPZB_HUMAN F-actin-capping protein subunit beta     | 4  | Carbamidomethyl+C(7)                         | DETVSDCSPHIANIGR                   | 199 | 16 | 4  | 24.07 | b5°b5b6b14                          | 1770.81 | 92.508  | 7525  | 2 | 885.91  | 1.930   |
| P47756 CAPZB_HUMAN F-actin-capping protein subunit beta     | 5  | Carbamidomethyl+C(7)                         | SDQQLDCALDLMR                      | 1   | 13 | 7  | 38.11 | b8b11b12°b12y6y11*y11               | 1564.70 | 122.206 | 6642  | 2 | 782.86  | -3.745  |
| P47756 CAPZB_HUMAN F-actin-capping protein subunit beta     | 6  | Carbamidomethyl+C(2)                         | GCWDSIHVVEVQEK                     | 145 | 14 | 3  | 17.67 | b11y8y11                            | 1685.83 | 76.786  | 5276  | 2 | 843.42  | 19.986  |
| P47756 CAPZB_HUMAN F-actin-capping protein subunit beta     | 7  |                                              | SIDAIPDNQK                         | 244 | 10 | 6  | 24.99 | b4y5°y5y8°y8*y8                     | 1100.58 | 26.510  | 2597  | 3 | 367.53  | 21.740  |
| P47756 CAPZB_HUMAN F-actin-capping protein subunit beta     | 8  | Carbamidomethyl+C(11)                        | QMEKDET VSDCSPHIANIGR              | 195 | 20 | 7  | 27.95 | b8b10y11y12°y12y19*y19              | 2287.02 | 109.315 | 80204 | 3 | 763.01  | -9.607  |
| P47756 CAPZB_HUMAN F-actin-capping protein subunit beta     | 9  |                                              | IRSTLNEIYFGK                       | 223 | 12 | 7  | 65.63 | y3y4y6y8°y8y10*y10                  | 1440.80 | 62.797  | 8466  | 3 | 480.94  | 9.574   |
| P47756 CAPZB_HUMAN F-actin-capping protein subunit beta     | 10 |                                              | KLEVEANNAFDQYR                     | 94  | 14 | 5  | 17.67 | b8b12°b12y13°y13                    | 1696.81 | 87.388  | 4897  | 2 | 848.91  | -11.582 |
| P47756 CAPZB_HUMAN F-actin-capping protein subunit beta     | 11 | Carbamidomethyl+C(8)                         | MSDQQLDCALDLMRR                    | 0   | 15 | 3  | 16.6  | b11b13y9                            | 1851.83 | 49.882  | 2243  | 2 | 926.42  | -11.404 |
| P47756 CAPZB_HUMAN F-actin-capping protein subunit beta     | 12 | Carbamidomethyl+C(11)<br>;Oxidation+M(2)     | QMEKDET VSDCSPHIANIGR              | 195 | 20 | 3  | 13.21 | b10b19y13                           | 2303.03 | 105.334 | 21641 | 3 | 768.35  | -5.194  |
| O75083 WDR1_HUMAN WD repeat-containing protein 1            | 1  |                                              | VFASLPQVER                         | 7   | 10 | 8  | 37.44 | b1b2b3y5*y5y7y8y10                  | 1145.63 | 58.711  | 51761 | 2 | 573.32  | -3.410  |
| O75083 WDR1_HUMAN WD repeat-containing protein 1            | 2  |                                              | GNNFLYTNGK                         | 28  | 10 | 8  | 37.44 | b7y2y3y5*y5y6°y6y10                 | 1127.55 | 45.017  | 29996 | 2 | 564.28  | 1.840   |
| O75083 WDR1_HUMAN WD repeat-containing protein 1            | 3  | Carbamidomethyl+C(26)                        | IWDVSVNSVVSTFPMGSTVLDQQ<br>LGCLWQK | 259 | 30 | 12 | 35.49 | b2b3b4b9°b9y5*y5y7*y7y10°<br>y10y11 | 3394.69 | 111.986 | 7611  | 3 | 1132.23 | 1.870   |

|                                                  |    |                                                |                                         |     |    |    |       |                             |         |         |        |   |         |         |
|--------------------------------------------------|----|------------------------------------------------|-----------------------------------------|-----|----|----|-------|-----------------------------|---------|---------|--------|---|---------|---------|
| O75083 WDR1_HUMAN WD repeat-containing protein 1 | 4  |                                                | LYSILGTTLKDEGK                          | 470 | 14 | 4  | 23.11 | b3b4y3°y3                   | 1537.85 | 92.515  | 6374   | 2 | 769.43  | -0.079  |
| O75083 WDR1_HUMAN WD repeat-containing protein 1 | 5  |                                                | FGAVFLWDSGSSVGEITGHNK                   | 126 | 21 | 5  | 19.84 | b4b14°b14b17y14             | 2208.08 | 70.941  | 5524   | 3 | 736.70  | 3.096   |
| O75083 WDR1_HUMAN WD repeat-containing protein 1 | 6  |                                                | NIDNPALADIYTEHAHQVVVAK                  | 43  | 22 | 11 | 68.8  | b3b4b6°b6b7b9y3y12y17y18y20 | 2418.20 | 62.167  | 128963 | 4 | 605.30  | -17.971 |
| O75083 WDR1_HUMAN WD repeat-containing protein 1 | 7  |                                                | LYSILGTTLK                              | 470 | 10 | 3  | 26.75 | b3y5y6                      | 1108.65 | 73.262  | 33831  | 2 | 554.83  | -7.267  |
| O75083 WDR1_HUMAN WD repeat-containing protein 1 | 8  | Carbamidomethyl+C(12)                          | MTVDESQLISCSMDDTVR                      | 370 | 19 | 4  | 18.69 | b3b9y4y9                    | 2143.95 | 67.514  | 33433  | 2 | 1072.48 | 10.135  |
| O75083 WDR1_HUMAN WD repeat-containing protein 1 | 9  |                                                | VVTVFSVADGYSENNVFYGHHA<br>K             | 511 | 23 | 6  | 48.8  | y3y5y6y7y12y19              | 2540.22 | 73.933  | 12256  | 3 | 847.41  | -0.865  |
| O75083 WDR1_HUMAN WD repeat-containing protein 1 | 10 |                                                | FTIGDHSR                                | 182 | 8  | 3  | 31.02 | b7y3y4                      | 932.45  | 29.853  | 11945  | 2 | 466.73  | -4.124  |
| O75083 WDR1_HUMAN WD repeat-containing protein 1 | 11 | Carbamidomethyl+C(18)                          | GPVTDVAYSHDGAFLAVCDASK                  | 489 | 22 | 5  | 23.06 | b5b8b10y3y7                 | 2280.06 | 64.836  | 11051  | 2 | 1140.53 | -1.606  |
| O75083 WDR1_HUMAN WD repeat-containing protein 1 | 12 |                                                | AHDGGIYAIWSPDSTHLLSASGD<br>K            | 231 | 25 | 6  | 24.68 | b6b7°b7b11y6y8              | 2585.21 | 72.582  | 9675   | 3 | 862.41  | -7.366  |
| O75083 WDR1_HUMAN WD repeat-containing protein 1 | 13 |                                                | DHLLSVSLSGYINYLR                        | 289 | 17 | 5  | 23.99 | b4b10b14y13*y13             | 1965.05 | 80.097  | 7364   | 2 | 983.03  | 19.134  |
| O75083 WDR1_HUMAN WD repeat-containing protein 1 | 14 | Carbamidomethyl+C(1);<br>Carbamidomethyl+C(14) | CVAVGPGGYAVVVCIGQIVLLK                  | 411 | 22 | 6  | 49.92 | b3b5b9b10b11b13             | 2272.25 | 116.284 | 5636   | 3 | 758.09  | -1.182  |
| O75083 WDR1_HUMAN WD repeat-containing protein 1 | 15 | Carbamidomethyl+C(4)                           | SIQCLTVHK                               | 321 | 9  | 7  | 56.4  | b3b4b6°b6y6y7°y7            | 1085.58 | 50.491  | 4234   | 2 | 543.30  | 5.173   |
| O75083 WDR1_HUMAN WD repeat-containing protein 1 | 16 |                                                | FATASADGQIYYDGGK                        | 203 | 16 | 5  | 26.11 | b3°b3b4b15y3                | 1719.82 | 88.534  | 3406   | 3 | 573.94  | -3.407  |
| O75083 WDR1_HUMAN WD repeat-containing protein 1 | 17 |                                                | EWTITY                                  | 600 | 6  | 1  | 12.93 | y5                          | 812.39  | 55.637  | 3118   | 1 | 812.39  | 11.570  |
| O75083 WDR1_HUMAN WD repeat-containing protein 1 | 18 |                                                | YAPSGFYIASGDVSGK                        | 65  | 16 | 3  | 15.7  | b3y5y12                     | 1618.79 | 112.236 | 3100   | 2 | 809.90  | 9.275   |
| O75083 WDR1_HUMAN WD repeat-containing protein 1 | 19 |                                                | DYSGQGVVK                               | 396 | 9  | 4  | 42.7  | b6b7b8y7                    | 952.49  | 34.952  | 2077   | 2 | 476.75  | 15.379  |
| O75083 WDR1_HUMAN WD repeat-containing protein 1 | 20 |                                                | AHDGGIYAIWSPDSTHLLSASGD<br>KTSK         | 231 | 28 | 5  | 33.65 | b7b8b12y16y17               | 2901.37 | 68.358  | 33117  | 4 | 726.10  | -9.172  |
| O75083 WDR1_HUMAN WD repeat-containing protein 1 | 21 | Carbamidomethyl+C(2)                           | KCFSIDNPGYEPEVVAVHPGGDT<br>VAIGVDGNVR   | 436 | 34 | 4  | 24.82 | y5y7y8y23                   | 3525.69 | 69.012  | 27766  | 4 | 882.18  | -4.986  |
| O75083 WDR1_HUMAN WD repeat-containing protein 1 | 22 |                                                | DIAWTEDSKR                              | 106 | 10 | 5  | 37.44 | b4°b4b8b9y6                 | 1220.59 | 45.816  | 18031  | 2 | 610.80  | -0.300  |
| O75083 WDR1_HUMAN WD repeat-containing protein 1 | 23 | Carbamidomethyl+C(8)                           | GHSKSIQCLTVHK                           | 317 | 13 | 5  | 18.95 | b4b9°b9y7°y7                | 1494.79 | 104.144 | 10648  | 2 | 747.90  | 4.328   |
| O75083 WDR1_HUMAN WD repeat-containing protein 1 | 24 | Carbamidomethyl+C(3)                           | IVCLAWSPDNEHFASGGMDMMV<br>YVWTLSDPETRVK | 534 | 35 | 5  | 35.76 | b6b7b8b11*b11               | 4041.85 | 115.346 | 9497   | 4 | 1011.22 | -3.201  |
| O75083 WDR1_HUMAN WD repeat-containing protein 1 | 25 | Carbamidomethyl+C(4)                           | FVNCVRFSPDGNR                           | 190 | 13 | 4  | 23.72 | b3b4y10°y10                 | 1567.73 | 93.609  | 8626   | 1 | 1567.73 | -5.762  |
| O75083 WDR1_HUMAN WD repeat-containing protein 1 | 26 | Carbamidomethyl+C(12)                          | FTIGDHSRFVNCVR                          | 182 | 14 | 8  | 64.01 | b7b11y3y5y8°y8y11y12        | 1707.84 | 68.098  | 3832   | 3 | 569.95  | 2.216   |
| O75083 WDR1_HUMAN WD repeat-containing protein 1 | 27 | Carbamidomethyl+C(6)                           | TGEKVCALGGSK                            | 219 | 12 | 4  | 24.49 | b7b8°b8y11                  | 1206.61 | 71.810  | 2323   | 2 | 603.81  | -1.821  |
| O75083 WDR1_HUMAN WD repeat-containing protein 1 | 28 |                                                | YAPSGFYIASGDVSGKLR                      | 65  | 18 | 3  | 21.43 | b5b12b14                    | 1887.94 | 79.491  | 2220   | 3 | 629.99  | -9.117  |
| O75083 WDR1_HUMAN WD repeat-containing protein 1 | 29 |                                                | EKGAVFLWDSGSSVGEITGHNK                  | 124 | 23 | 3  | 12.12 | b4b14y15                    | 2465.17 | 99.846  | 1840   | 3 | 822.40  | -14.756 |
| O75083 WDR1_HUMAN WD repeat-containing protein 1 | 30 | Carbamidomethyl+C(15)                          | QSRPYRLATGSDDNCAAFEGPPF<br>K            | 155 | 25 | 3  | 11.62 | b13y8y11                    | 2831.32 | 74.529  | 1518   | 4 | 708.59  | 0.431   |
| O75083 WDR1_HUMAN WD repeat-containing protein 1 | 31 | Phosphoryl STY(4)                              | IWDTTQKEHLLK                            | 83  | 12 | 3  | 24.49 | b3y10y11                    | 1591.77 | 53.172  | 2037   | 2 | 796.39  | -2.761  |
| O75083 WDR1_HUMAN WD repeat-containing protein 1 | 32 |                                                | FGAVFLWDSGSSVGEI                        | 126 | 16 | 0  | 7.68  |                             | 1670.80 | 70.906  | 6502   | 2 | 835.91  | -1.607  |



|                                                   |    |                                             |                                |     |    |    |       |                                                 |         |         |       |   |        |         |
|---------------------------------------------------|----|---------------------------------------------|--------------------------------|-----|----|----|-------|-------------------------------------------------|---------|---------|-------|---|--------|---------|
| O75083 WDR1_HUMAN WD repeat-containing protein 1  | 33 |                                             | LYSILGTTLLKDEGK                | 470 | 14 | 0  | 4.32  |                                                 | 1519.83 | 92.513  | 3888  | 2 | 760.42 | 0.723   |
| P30101 PDIA3_HUMAN Protein disulfide-isomerase A3 | 1  |                                             | ELSDFISYLQREATNPPVQEEKPK       | 471 | 25 | 11 | 25.76 | b2b6b10°b10*b10b20b21y1y5°y5y25                 | 2931.47 | 105.729 | 85567 | 4 | 733.62 | -12.576 |
| P30101 PDIA3_HUMAN Protein disulfide-isomerase A3 | 2  |                                             | FISDKDASIVGFFDDSFSEAHSEFLK     | 147 | 26 | 19 | 99.29 | b2b4b6b7b11b14y1y3y4y6°y6y8°y8y9y11y12y14y16y26 | 2938.36 | 98.919  | 50699 | 4 | 735.35 | -6.481  |
| P30101 PDIA3_HUMAN Protein disulfide-isomerase A3 | 3  |                                             | ELSDFISYLQR                    | 471 | 11 | 7  | 49.13 | b4b6°b6b9y4y9y11                                | 1370.69 | 85.484  | 26691 | 2 | 685.85 | -1.959  |
| P30101 PDIA3_HUMAN Protein disulfide-isomerase A3 | 4  |                                             | LAPEYEEAATR                    | 62  | 11 | 8  | 65.15 | y3°y3y5y6y7°y7y9y11                             | 1191.60 | 37.582  | 23139 | 2 | 596.31 | 2.561   |
| P30101 PDIA3_HUMAN Protein disulfide-isomerase A3 | 5  |                                             | LSKDPNIVIAK                    | 422 | 11 | 4  | 22.46 | b6y2y4y7                                        | 1197.71 | 40.394  | 13705 | 3 | 399.91 | -10.498 |
| P30101 PDIA3_HUMAN Protein disulfide-isomerase A3 | 6  |                                             | FLQDYFDGNLKR                   | 351 | 12 | 6  | 20.51 | b6b8°b8*b8y8y12                                 | 1515.76 | 60.134  | 4895  | 2 | 758.38 | -2.255  |
| P30101 PDIA3_HUMAN Protein disulfide-isomerase A3 | 7  |                                             | IFRDGEEAGAYDGPR                | 104 | 15 | 5  | 34.02 | b11b13y6y7y9                                    | 1652.75 | 83.312  | 3315  | 2 | 826.88 | -8.198  |
| P30101 PDIA3_HUMAN Protein disulfide-isomerase A3 | 8  | Carbamidomethyl+C(11);Carbamidomethyl+C(14) | DVLIEFYAPWCGHCK                | 395 | 15 | 3  | 16.6  | b3b13y9                                         | 1894.87 | 53.277  | 2542  | 2 | 947.94 | 2.255   |
| P30101 PDIA3_HUMAN Protein disulfide-isomerase A3 | 9  |                                             | ELGEK                          | 417 | 5  | 1  | 12.45 | b4                                              | 575.31  | 25.480  | 10513 | 1 | 575.31 | 6.896   |
| P30101 PDIA3_HUMAN Protein disulfide-isomerase A3 | 10 |                                             | DASIVGFFDDSFSEAHSEFLK          | 152 | 21 | 4  | 17.07 | b12b14y6y13                                     | 2348.11 | 101.895 | 9433  | 3 | 783.37 | 14.868  |
| P30101 PDIA3_HUMAN Protein disulfide-isomerase A3 | 11 |                                             | YGVSGYPTLK                     | 94  | 10 | 5  | 49.2  | b4°b4b5b6b8                                     | 1084.57 | 49.800  | 5180  | 2 | 542.79 | 4.052   |
| P30101 PDIA3_HUMAN Protein disulfide-isomerase A3 | 12 |                                             | SEPIPESNDGPVK                  | 366 | 13 | 4  | 18.95 | b3b7y7°y7                                       | 1368.68 | 44.951  | 4779  | 2 | 684.84 | 8.741   |
| P30101 PDIA3_HUMAN Protein disulfide-isomerase A3 | 13 | Carbamidomethyl+C(19);Carbamidomethyl+C(22) | ISDTGSAGLMLVEFFAPWCGHCK        | 38  | 23 | 6  | 30.68 | b5b7b12b16y4y12                                 | 2583.21 | 85.380  | 4323  | 3 | 861.74 | 11.341  |
| P30101 PDIA3_HUMAN Protein disulfide-isomerase A3 | 14 |                                             | TFSHELSDFGLESTAGEIPVVAIR       | 305 | 24 | 4  | 17.82 | b5b7b10y19                                      | 2575.28 | 109.327 | 3614  | 3 | 859.10 | -8.153  |
| P30101 PDIA3_HUMAN Protein disulfide-isomerase A3 | 15 |                                             | GSNYWR                         | 274 | 6  | 1  | 12.93 | y5                                              | 782.36  | 58.697  | 2826  | 1 | 782.36 | 8.270   |
| P30101 PDIA3_HUMAN Protein disulfide-isomerase A3 | 16 |                                             | LAAASDVLELTDDNFESR             | 20  | 18 | 4  | 14.27 | b5°b5b7y11                                      | 1965.94 | 47.957  | 2640  | 3 | 655.99 | 1.304   |
| P30101 PDIA3_HUMAN Protein disulfide-isomerase A3 | 17 |                                             | FLQDYFDGNLK                    | 351 | 11 | 10 | 49.13 | b8*b8b10°b10y7y8°y8*y8y9°y9                     | 1359.63 | 42.606  | 2346  | 2 | 680.32 | -19.393 |
| P30101 PDIA3_HUMAN Protein disulfide-isomerase A3 | 18 |                                             | FVMQEFSR                       | 335 | 9  | 7  | 78.4  | b4b6b8y5y7°y7y8                                 | 1172.56 | 34.967  | 2034  | 2 | 586.79 | 20.197  |
| P30101 PDIA3_HUMAN Protein disulfide-isomerase A3 | 19 | Carbamidomethyl+C(10)                       | FIQENIFGICPHMTEDNK             | 234 | 18 | 3  | 14.27 | b8b11y13                                        | 2193.05 | 51.227  | 1596  | 3 | 731.69 | 18.258  |
| P30101 PDIA3_HUMAN Protein disulfide-isomerase A3 | 20 |                                             | FISDKDASIVGFFDDSFSEAHSEFLK     | 147 | 26 | 4  | 17.58 | y6°y6y8y14                                      | 2938.39 | 121.980 | 35592 | 3 | 980.13 | 4.071   |
| P30101 PDIA3_HUMAN Protein disulfide-isomerase A3 | 21 |                                             | ELGEKLSK                       | 417 | 8  | 3  | 38.8  | y3y4y7                                          | 903.51  | 26.278  | 7691  | 2 | 452.26 | -3.851  |
| P30101 PDIA3_HUMAN Protein disulfide-isomerase A3 | 22 |                                             | DASIVGFFDDSFSEAHSEFLKAASNLR    | 152 | 27 | 3  | 17.36 | b5b10b15                                        | 2960.42 | 78.874  | 5237  | 3 | 987.48 | 3.299   |
| P30101 PDIA3_HUMAN Protein disulfide-isomerase A3 | 23 |                                             | QAGPASVPLRTEEFK                | 130 | 16 | 4  | 15.7  | b6b13*b13y7                                     | 1758.89 | 71.931  | 1544  | 2 | 879.95 | -8.328  |
| P30101 PDIA3_HUMAN Protein disulfide-isomerase A3 | 24 | Phosphoryl STY(13)                          | YEGGRELSDFISYLQREATNPPVIQEEKPK | 466 | 30 | 6  | 21.65 | b7b9b14_H3PO4b14°b14b22y16                      | 3573.68 | 92.499  | 9671  | 4 | 894.18 | -9.291  |
| P30101 PDIA3_HUMAN Protein disulfide-isomerase A3 | 25 | Phosphoryl STY(6)                           | GFPTIYFSPANKK                  | 448 | 13 | 6  | 42.88 | b3b4b10y9°y9y10                                 | 1549.74 | 65.847  | 3194  | 2 | 775.38 | 5.514   |
| P30101 PDIA3_HUMAN Protein disulfide-isomerase A3 | 26 | Oxidation+M(1)                              | MDATANDVPSPYEVR                | 433 | 15 | 4  | 27.13 | b4b11b13y6                                      | 1680.77 | 43.715  | 23851 | 3 | 560.93 | 8.861   |

|                                                    |    |                                                |                                   |     |    |    |       |                             |         |         |        |   |         |         |
|----------------------------------------------------|----|------------------------------------------------|-----------------------------------|-----|----|----|-------|-----------------------------|---------|---------|--------|---|---------|---------|
| IP30101 PDIA3_HUMAN Protein disulfide-isomerase A3 | 27 | Carbamidomethyl+C(10);Oxidation+M(13)          | FIQENIFGICPHMTEDNK                | 234 | 18 | 5  | 23.19 | y3y4°y4*y4y10               | 2208.98 | 58.588  | 1661   | 2 | 1104.99 | -13.484 |
| IP30101 PDIA3_HUMAN Protein disulfide-isomerase A3 | 28 |                                                | SKDPNIVIAK                        | 423 | 10 | 0  | 2.88  |                             | 1084.62 | 40.355  | 5733   | 2 | 542.82  | -10.354 |
| IP02533 K1C14_HUMAN Keratin                        | 1  |                                                | LLEGEDAHLSSSQFSSGSQSSRDV<br>TSSSR | 417 | 29 | 4  | 11.05 | b5y5y8y29                   | 3041.40 | 66.561  | 48733  | 3 | 1014.47 | -1.365  |
| IP02533 K1C14_HUMAN Keratin                        | 2  |                                                | VTMQNLNDR                         | 116 | 9  | 7  | 61.18 | b6y3y5°y5y7y8*y8            | 1090.53 | 35.742  | 18548  | 2 | 545.77  | 0.672   |
| IP02533 K1C14_HUMAN Keratin                        | 3  |                                                | ILNEMRDQYEK                       | 282 | 11 | 5  | 38.89 | b5b7b9y2y9                  | 1438.72 | 47.828  | 6915   | 3 | 480.24  | 13.406  |
| IP02533 K1C14_HUMAN Keratin                        | 4  |                                                | LEQEIATYR                         | 407 | 9  | 9  | 56.4  | b4°b4b5°b5b7°b7y3y7°y7      | 1122.58 | 83.177  | 36796  | 2 | 561.80  | 3.806   |
| IP02533 K1C14_HUMAN Keratin                        | 5  |                                                | TMQNLEIELQSLSMK                   | 336 | 16 | 9  | 22.03 | b7°b7*b7b11°b11y5*y5y12*y12 | 1892.93 | 71.827  | 20593  | 3 | 631.65  | -9.544  |
| IP02533 K1C14_HUMAN Keratin                        | 6  |                                                | VMDVHDGK                          | 451 | 8  | 4  | 38.8  | b5°b5b6b7                   | 900.42  | 89.663  | 10611  | 1 | 900.42  | -7.321  |
| IP02533 K1C14_HUMAN Keratin                        | 7  |                                                | DQYEK                             | 288 | 5  | 3  | 24.91 | y3y4*y4                     | 682.30  | 71.061  | 4064   | 1 | 682.30  | -5.636  |
| IP02533 K1C14_HUMAN Keratin                        | 8  |                                                | DYSPYFK                           | 160 | 7  | 4  | 35.31 | b3y5y6°y6                   | 919.42  | 95.937  | 3731   | 1 | 919.42  | 0.730   |
| IP02533 K1C14_HUMAN Keratin                        | 9  |                                                | LLEGEDAHLSSSQFSSGSQSSR            | 417 | 22 | 5  | 19.09 | b8y6y9y15°y15               | 2309.03 | 77.295  | 3508   | 2 | 1155.02 | -16.177 |
| IP02533 K1C14_HUMAN Keratin                        | 10 |                                                | YETELNLR                          | 203 | 8  | 6  | 31.02 | b4°b4y5°y5y6*y6             | 1037.51 | 34.945  | 2767   | 2 | 519.26  | -11.177 |
| IP02533 K1C14_HUMAN Keratin                        | 11 |                                                | ASLENSLEETK                       | 352 | 11 | 3  | 29.45 | b5b6b8                      | 1220.60 | 58.653  | 2503   | 1 | 1220.60 | -0.700  |
| IP02533 K1C14_HUMAN Keratin                        | 12 |                                                | TEELNR                            | 309 | 6  | 2  | 12.93 | b3°b3                       | 761.37  | 34.941  | 2046   | 2 | 381.19  | -9.459  |
| IP02533 K1C14_HUMAN Keratin                        | 13 | Carbamidomethyl+C(3)                           | GSCGIGGGIGGGSSR                   | 15  | 15 | 5  | 34.4  | y4y9y10y12°y12              | 1278.58 | 40.526  | 1519   | 2 | 639.79  | -6.015  |
| IP02533 K1C14_HUMAN Keratin                        | 14 |                                                | RLLEGEDAHLSSSQFSSGSQSSR           | 416 | 23 | 4  | 18.42 | b12y6y11y17                 | 2465.20 | 92.566  | 204998 | 3 | 822.40  | 14.261  |
| IP02533 K1C14_HUMAN Keratin                        | 15 | Carbamidomethyl+C(10)                          | ISSVLAGGSCRAPSTYGGGLSVSS<br>SR    | 30  | 26 | 6  | 19.7  | b12b14b21y10°y10y13         | 2513.26 | 103.599 | 40288  | 3 | 838.43  | 9.423   |
| IP02533 K1C14_HUMAN Keratin                        | 16 |                                                | ASLENSLEETKGR                     | 352 | 13 | 3  | 18.95 | b3b6y9                      | 1433.72 | 44.271  | 10940  | 3 | 478.58  | -2.980  |
| IP02533 K1C14_HUMAN Keratin                        | 17 | Carbamidomethyl+C(3);<br>Carbamidomethyl+C(25) | GSCGIGGGIGGGSSRISVLAGGSC<br>R     | 15  | 26 | 4  | 14.32 | b11b14y15y23                | 2366.10 | 75.278  | 4758   | 3 | 789.37  | -14.549 |
| IP02533 K1C14_HUMAN Keratin                        | 18 |                                                | ALEEANADLEVKIR                    | 134 | 14 | 5  | 25.45 | b7°b7b8b11°b11              | 1570.83 | 106.327 | 3557   | 2 | 785.92  | -9.947  |
| IP02533 K1C14_HUMAN Keratin                        | 19 | Carbamidomethyl+C(12)                          | QFTSSSSMKGSCGIGGGIGGGSSR          | 6   | 24 | 3  | 11.85 | b13y7y9                     | 2262.00 | 65.980  | 3332   | 3 | 754.67  | -12.628 |
| IP02533 K1C14_HUMAN Keratin                        | 20 |                                                | DAEEWFFTKTEELNR                   | 300 | 15 | 3  | 24.68 | b8b9b11                     | 1914.91 | 54.636  | 2497   | 2 | 957.96  | 9.754   |
| IP02533 K1C14_HUMAN Keratin                        | 21 |                                                | YETELNLRMSVEADINGLR               | 203 | 19 | 4  | 20.66 | b7°b7b9b11                  | 2223.09 | 72.453  | 2463   | 3 | 741.70  | -6.260  |
| IP02533 K1C14_HUMAN Keratin                        | 22 |                                                | EVATNSELVQSGKSEISELR              | 315 | 20 | 3  | 13.21 | b14y7y11                    | 2176.11 | 110.540 | 2451   | 2 | 1088.56 | -1.122  |
| IP02533 K1C14_HUMAN Keratin                        | 23 |                                                | TKVMDVHDGK                        | 449 | 10 | 4  | 26.75 | b6b7y8*y8                   | 1129.55 | 41.863  | 1954   | 2 | 565.28  | -13.725 |
| IP02533 K1C14_HUMAN Keratin                        | 24 | Carbamidomethyl+C(3)                           | TTCSTRQFTSSSMK                    | 1   | 14 | 7  | 28.36 | b7°b7*b7y7y7y8y11           | 1607.72 | 41.844  | 1603   | 2 | 804.36  | 4.328   |
| IP02533 K1C14_HUMAN Keratin                        | 25 |                                                | TMQNLEIELQSLSMKASLENSLE<br>ETK    | 336 | 27 | 6  | 26.18 | b5b8y4y6y10y13              | 3094.51 | 95.979  | 1526   | 3 | 1032.17 | -6.469  |
| IP02533 K1C14_HUMAN Keratin                        | 26 | Phosphoryl STY(4)                              | EVATNSELVQSGK                     | 315 | 13 | 4  | 18.95 | b3b9*b9y9                   | 1441.65 | 33.445  | 6325   | 2 | 721.33  | -0.677  |
| IP02533 K1C14_HUMAN Keratin                        | 27 | Phosphoryl STY(7)                              | LEQEIATYRR                        | 407 | 10 | 5  | 26.75 | b6°b6b7_H3PO4 b7y8*y8       | 1358.63 | 41.828  | 2755   | 3 | 453.55  | -7.457  |
| IP02533 K1C14_HUMAN Keratin                        | 28 | Carbamidomethyl+C(3);<br>Phosphoryl STY(13)    | GSCGIGGGIGGGSSR                   | 15  | 15 | 4  | 27.13 | b4b11b12y7                  | 1358.55 | 47.308  | 2321   | 2 | 679.78  | 2.336   |
| IP02533 K1C14_HUMAN Keratin                        | 29 | Phosphoryl STY(11)                             | TMQNLEIELQSLSMK                   | 336 | 16 | 4  | 33.1  | b10b11°b11b12               | 1972.88 | 93.673  | 1922   | 3 | 658.30  | -12.437 |
| IP02533 K1C14_HUMAN Keratin                        | 30 | Phosphoryl STY(9)                              | ADLEMQIESLK                       | 232 | 11 | 10 | 56.02 | b3°b3b6b7°b7y3y6°y6*y6y7    | 1356.62 | 36.552  | 1915   | 2 | 678.81  | 10.618  |
| IP02533 K1C14_HUMAN Keratin                        | 31 | Oxidation+M(15)                                | TMQNLEIELQSLSMK                   | 336 | 16 | 4  | 15.7  | b4b11°b11y7                 | 1908.92 | 73.843  | 20027  | 3 | 636.98  | -13.237 |
| IP02533 K1C14_HUMAN Keratin                        | 32 | Oxidation+M(2)                                 | VMDVHDGK                          | 451 | 8  | 5  | 34.03 | b4°b4y3y5°y5                | 916.42  | 71.853  | 4508   | 2 | 458.71  | -2.997  |
| IQ3ZCM7 TBB8_HUMAN Tubulin beta-8 chain            | 1  |                                                | LAVNMVPPFR                        | 252 | 10 | 8  | 77.12 | b2y4y5y6y7y8y9y10           | 1143.63 | 72.778  | 168761 | 2 | 572.32  | -4.483  |
| IQ3ZCM7 TBB8_HUMAN Tubulin beta-8 chain            | 2  |                                                | AVLVDPGPTMDSVR                    | 62  | 15 | 8  | 27.13 | b2b3y2y8°y8y9y11y15         | 1601.82 | 71.013  | 47589  | 2 | 801.41  | -0.915  |
| IQ3ZCM7 TBB8_HUMAN Tubulin beta-8 chain            | 3  |                                                | LHFFMPGFAPLTSR                    | 262 | 14 | 6  | 35.88 | b5b8b9y3y12y14              | 1620.82 | 89.694  | 38804  | 3 | 540.94  | -10.393 |
| IQ3ZCM7 TBB8_HUMAN Tubulin beta-8 chain            | 4  |                                                | VSEQFTAMFR                        | 380 | 10 | 7  | 31.98 | b1b3b4°b4b9b10y10           | 1215.57 | 50.525  | 25349  | 2 | 608.29  | -9.540  |

|                                        |    |                                                                                                               |                                              |     |    |    |       |                                |         |         |       |   |         |         |
|----------------------------------------|----|---------------------------------------------------------------------------------------------------------------|----------------------------------------------|-----|----|----|-------|--------------------------------|---------|---------|-------|---|---------|---------|
| Q3ZCM7 TBB8_HUMAN Tubulin beta-8 chain | 5  |                                                                                                               | IREEYPDR                                     | 154 | 8  | 7  | 51.25 | b2b4b7y1y3y6y8                 | 1077.54 | 25.047  | 19158 | 2 | 539.27  | 3.285   |
| Q3ZCM7 TBB8_HUMAN Tubulin beta-8 chain | 6  |                                                                                                               | MSATFIGNNTAIQELFK                            | 362 | 17 | 3  | 21.92 | b4y10y11                       | 1884.97 | 94.631  | 11299 | 3 | 629.00  | 11.333  |
| Q3ZCM7 TBB8_HUMAN Tubulin beta-8 chain | 7  |                                                                                                               | FWEVISDEHAIDSAGTYHGDSLQLER                   | 19  | 27 | 10 | 40.92 | b4°b4b7°b7b10b11y7y13y14y19    | 3112.49 | 95.954  | 8531  | 3 | 1038.17 | 15.453  |
| Q3ZCM7 TBB8_HUMAN Tubulin beta-8 chain | 8  |                                                                                                               | NSSYFADWLPNNVK                               | 336 | 14 | 7  | 29.15 | b3b11°b11b13y10°y10*y10        | 1654.81 | 59.583  | 5422  | 3 | 552.27  | 12.836  |
| Q3ZCM7 TBB8_HUMAN Tubulin beta-8 chain | 9  | Carbamidomethyl+C(18)                                                                                         | SGPFGQVFRPDNFIFGQCAGNNWAK                    | 77  | 26 | 4  | 11.43 | b8*b8b11y9                     | 2871.40 | 108.765 | 3655  | 3 | 957.81  | 20.662  |
| Q3ZCM7 TBB8_HUMAN Tubulin beta-8 chain | 10 |                                                                                                               | EVDEQMFNIQDK                                 | 324 | 12 | 5  | 42.38 | y5y6*y6y9y11                   | 1495.70 | 78.281  | 2546  | 2 | 748.35  | 15.997  |
| Q3ZCM7 TBB8_HUMAN Tubulin beta-8 chain | 11 | Carbamidomethyl+C(18)                                                                                         | SGPFGQVFRPDNFIFGQCAGNNWAKGHYTEGAELMESVMDVVR  | 77  | 44 | 5  | 21.39 | b8b12*b12b13y10                | 4875.27 | 125.960 | 30831 | 4 | 1219.57 | 3.205   |
| Q3ZCM7 TBB8_HUMAN Tubulin beta-8 chain | 12 |                                                                                                               | MPMREVDEQMFNIQDK                             | 320 | 16 | 4  | 24.07 | y9y10°y10y13                   | 2010.90 | 67.029  | 8812  | 3 | 670.97  | -3.764  |
| Q3ZCM7 TBB8_HUMAN Tubulin beta-8 chain | 13 |                                                                                                               | INVYYNEASGGRYVPR                             | 46  | 16 | 4  | 25.44 | b6b10b12y8                     | 1857.92 | 42.670  | 2130  | 2 | 929.46  | -4.796  |
| Q3ZCM7 TBB8_HUMAN Tubulin beta-8 chain | 14 | Oxidation+M(11)                                                                                               | ALTVAELTQMFDK                                | 282 | 15 | 6  | 27.13 | b6°b6y6y8°y8y14                | 1681.86 | 85.936  | 50856 | 3 | 561.29  | 10.379  |
| Q3ZCM7 TBB8_HUMAN Tubulin beta-8 chain | 15 | Oxidation+M(8)                                                                                                | VSEQFTAMFRR                                  | 380 | 11 | 3  | 34.22 | b4b5b6                         | 1387.70 | 37.399  | 6904  | 2 | 694.35  | 14.603  |
| Q3ZCM7 TBB8_HUMAN Tubulin beta-8 chain | 16 | Oxidation+M(14)                                                                                               | GHYTEGAELMESVMDVVR                           | 103 | 18 | 4  | 14.27 | b9y8°y8y11                     | 2038.91 | 83.120  | 5375  | 2 | 1019.96 | -7.424  |
| Q3ZCM7 TBB8_HUMAN Tubulin beta-8 chain | 17 | Oxidation+M(6)                                                                                                | EVDEQMFNIQDK                                 | 324 | 12 | 7  | 60.86 | y5°y5y6y7*y7y8y9               | 1511.68 | 41.785  | 3241  | 3 | 504.57  | 8.883   |
| Q3ZCM7 TBB8_HUMAN Tubulin beta-8 chain | 18 | Oxidation+M(8)                                                                                                | VSEQFTAMFR                                   | 380 | 10 | 4  | 40.45 | b3y6y7y8                       | 1231.56 | 34.952  | 2033  | 2 | 616.28  | -14.570 |
| Q15942 ZYX_HUMAN Zyxin                 | 1  | Carbamidomethyl+C(10);Carbamidomethyl+C(13);Carbamidomethyl+C(16);Carbamidomethyl+C(34);Carbamidomethyl+C(37) | ALGQLFHIACTCHQCAQLQGGQ QFYSLGAPYCEGCYTDITLEK | 399 | 44 | 9  | 28.45 | b3b15b20b21b25b31y2y11y13      | 5228.33 | 87.352  | 63892 | 4 | 1307.84 | 3.269   |
| Q15942 ZYX_HUMAN Zyxin                 | 2  |                                                                                                               | LGHPREALSAGTGSPQPPSFTYAQQR                   | 295 | 25 | 6  | 11.62 | b3b6°y5*y5y11y25               | 2597.26 | 56.810  | 40741 | 3 | 866.43  | -3.572  |
| Q15942 ZYX_HUMAN Zyxin                 | 3  |                                                                                                               | VNPFPRPGDSEPPAPGAQR                          | 35  | 19 | 7  | 37.11 | b2b8y7y8y9y17y19               | 1988.99 | 45.432  | 25319 | 3 | 663.67  | -2.087  |
| Q15942 ZYX_HUMAN Zyxin                 | 4  | Carbamidomethyl+C(1);Carbamidomethyl+C(4);Carbamidomethyl+C(17);Carbamidomethyl+C(26)                         | CEDCGKPLSIEADDNGCFPLDGHV LCR                 | 536 | 27 | 6  | 13.93 | b1b10b21y6y12y27               | 3134.35 | 68.846  | 21266 | 4 | 784.34  | 2.726   |
| Q15942 ZYX_HUMAN Zyxin                 | 5  |                                                                                                               | FSPGAPGGSGSQPNQK                             | 279 | 16 | 11 | 54.76 | b5°b5b8b15y4y6°y6y11*y11y14y16 | 1515.72 | 29.114  | 14298 | 2 | 758.36  | 1.208   |
| Q15942 ZYX_HUMAN Zyxin                 | 6  |                                                                                                               | FGPVVAPKPK                                   | 25  | 10 | 7  | 40.45 | b2b4y2y4y5y6y10                | 1039.63 | 39.477  | 10972 | 2 | 520.32  | -3.405  |
| Q15942 ZYX_HUMAN Zyxin                 | 7  | Carbamidomethyl+C(1);Carbamidomethyl+C(4);Carbamidomethyl+C(17);Carbamidomethyl+C(26)                         | CEDCGKPLSIEADDNGCFPLDGHV LCRK                | 536 | 28 | 4  | 22.17 | y12y14°y14y15                  | 3262.46 | 92.488  | 8920  | 2 | 1631.74 | 7.483   |
| Q15942 ZYX_HUMAN Zyxin                 | 8  |                                                                                                               | GPPASSPAPAK                                  | 253 | 12 | 4  | 20.51 | b4b7y1y10                      | 1076.57 | 23.385  | 8712  | 2 | 538.79  | -2.381  |
| Q15942 ZYX_HUMAN Zyxin                 | 9  |                                                                                                               | QHPVPPAQNQNVQR                               | 328 | 15 | 4  | 16.6  | b4°b4b8y5                      | 1709.87 | 24.894  | 5669  | 3 | 570.63  | -6.996  |
| Q15942 ZYX_HUMAN Zyxin                 | 10 |                                                                                                               | SSTKPAAGGTAPLPPWK                            | 184 | 17 | 4  | 33.12 | b10°b10b11b12                  | 1665.92 | 85.943  | 50241 | 2 | 833.46  | 15.095  |
| Q15942 ZYX_HUMAN Zyxin                 | 11 |                                                                                                               | QYAPR                                        | 498 | 5  | 1  | 12.45 | b3                             | 634.32  | 50.511  | 23318 | 1 | 634.32  | -12.990 |
| Q15942 ZYX_HUMAN Zyxin                 | 12 | Carbamidomethyl+C(1);Carbamidomethyl+C(4)                                                                     | CNTCGEPITDR                                  | 443 | 11 | 4  | 29.45 | y4y5°y5y9                      | 1322.55 | 28.264  | 8607  | 2 | 661.78  | 3.784   |

|                                                                   |    |                       |                                      |     |    |   |       |                                   |         |         |       |   |         |         |
|-------------------------------------------------------------------|----|-----------------------|--------------------------------------|-----|----|---|-------|-----------------------------------|---------|---------|-------|---|---------|---------|
| Q15942 ZYX_HUMAN Zyxin                                            | 13 |                       | VSSIDLEIDSLSSLLDDMTK                 | 140 | 20 | 6 | 25.31 | b10b12y7°y7y11y13                 | 2181.06 | 65.852  | 3216  | 3 | 727.69  | -11.753 |
| Q15942 ZYX_HUMAN Zyxin                                            | 14 |                       | NDPFK                                | 160 | 5  | 1 | 12.45 | b4                                | 620.30  | 89.753  | 2907  | 1 | 620.30  | -1.181  |
| Q15942 ZYX_HUMAN Zyxin                                            | 15 |                       | EVEELEQLTQQLMQDMEHPQR                | 354 | 21 | 5 | 19.84 | b3b9b13°b13y9                     | 2611.21 | 88.018  | 2055  | 3 | 871.08  | 0.655   |
| Q15942 ZYX_HUMAN Zyxin                                            | 16 | Carbamidomethyl+C(9)  | QNVAVNELCGR                          | 375 | 11 | 8 | 47.37 | b3b4*b4y4y9°y9y10*y10             | 1259.61 | 49.741  | 1847  | 2 | 630.31  | -3.004  |
| Q15942 ZYX_HUMAN Zyxin                                            | 17 |                       | VSSIDLEIDSLSSLLDDMTKNDPFK            | 140 | 25 | 6 | 24.68 | b7b9y10y11°y11y23                 | 2782.35 | 124.110 | 8690  | 3 | 928.12  | -6.581  |
| Q15942 ZYX_HUMAN Zyxin                                            | 18 | Carbamidomethyl+C(6)  | NFHMKCYK                             | 528 | 8  | 5 | 54.26 | b3*b3y3y5y7                       | 1127.50 | 26.537  | 6330  | 2 | 564.25  | -10.394 |
| Q15942 ZYX_HUMAN Zyxin                                            | 19 | Carbamidomethyl+C(30) | EVEELEQLTQQLMQDMEHPQRQ<br>NVAVNELCGR | 354 | 32 | 5 | 12.54 | b7b12y4y6°y6                      | 3851.86 | 63.439  | 2235  | 4 | 963.72  | 13.754  |
| Q15942 ZYX_HUMAN Zyxin                                            | 20 | Phosphoryl.STY(9)     | FSPGAPGGSGSQPNQK                     | 279 | 16 | 6 | 32.84 | b3b5°b5b7b8°b8                    | 1595.66 | 44.147  | 31641 | 2 | 798.34  | -7.268  |
| Q15942 ZYX_HUMAN Zyxin                                            | 21 | Oxidation+M()         | EVEELEQLTQQLMQDMEHPQR                | 354 | 21 | 5 | 21.24 | b9°b9b10°b10y10                   | 2627.18 | 136.372 | 4440  | 2 | 1314.09 | -10.687 |
| Q96SB8 SMC6_HUMAN Structural maintenance of chromosomes protein 6 | 1  |                       | DELNLADSEVDNQK                       | 798 | 14 | 9 | 25.19 | b10°b10b12b14y6y10°y10y13<br>*y14 | 1589.73 | 93.068  | 54293 | 2 | 795.37  | -0.384  |
| Q96SB8 SMC6_HUMAN Structural maintenance of chromosomes protein 6 | 2  |                       | REELDVK                              | 449 | 7  | 9 | 66.24 | b2°b2b3b5°b5y3y5y6y7              | 888.47  | 46.835  | 29407 | 2 | 444.74  | -10.030 |
| Q96SB8 SMC6_HUMAN Structural maintenance of chromosomes protein 6 | 3  |                       | ATQLEQMKEDYSYIMETK                   | 212 | 18 | 8 | 40.13 | b7b11°b11b12y7y8y12y18            | 2208.04 | 69.488  | 14195 | 3 | 736.69  | 10.946  |
| Q96SB8 SMC6_HUMAN Structural maintenance of chromosomes protein 6 | 4  |                       | DELNLADSEVDNQKR                      | 798 | 15 | 8 | 49.29 | b2b3b4b5°b5b8b14y15               | 1745.85 | 84.430  | 3824  | 3 | 582.62  | 9.230   |
| Q96SB8 SMC6_HUMAN Structural maintenance of chromosomes protein 6 | 5  |                       | FLSRDVDSEISDLENEVENK                 | 658 | 20 | 3 | 13.21 | b3b7y15                           | 2338.11 | 84.500  | 3426  | 2 | 1169.56 | 2.715   |
| Q96SB8 SMC6_HUMAN Structural maintenance of chromosomes protein 6 | 6  |                       | FQSIAGLSTMK                          | 257 | 11 | 4 | 29.45 | b3b4*b4b8                         | 1182.61 | 105.678 | 1787  | 1 | 1182.61 | -10.838 |
| Q96SB8 SMC6_HUMAN Structural maintenance of chromosomes protein 6 | 7  |                       | EQIHQGEER                            | 234 | 9  | 4 | 44.05 | b3°b3b6b8                         | 1125.53 | 36.488  | 1514  | 2 | 563.27  | 3.796   |
| Q96SB8 SMC6_HUMAN Structural maintenance of chromosomes protein 6 | 8  |                       | NETLSISVQPGEENK                      | 963 | 15 | 6 | 35.53 | b5b6*b6y7y8*y8                    | 1572.76 | 80.020  | 13823 | 2 | 786.88  | -15.600 |
| Q96SB8 SMC6_HUMAN Structural maintenance of chromosomes protein 6 | 9  |                       | HALSYNQR                             | 456 | 8  | 7 | 51.25 | b3b6°b6*b6y3*y3y7                 | 988.49  | 71.890  | 10580 | 2 | 494.75  | -8.891  |
| Q96SB8 SMC6_HUMAN Structural maintenance of chromosomes protein 6 | 10 |                       | FGSNVNFVVGNGSGK                      | 66  | 16 | 9 | 35.14 | b4°b4*b4b5°b5*b5b6°b6y11          | 1596.74 | 48.778  | 9023  | 2 | 798.88  | -20.794 |
| Q96SB8 SMC6_HUMAN Structural maintenance of chromosomes protein 6 | 11 |                       | STDQSLEPER                           | 393 | 10 | 5 | 40.45 | b4°b4y5y6y7                       | 1161.52 | 21.930  | 7788  | 3 | 387.84  | -19.337 |
| Q96SB8 SMC6_HUMAN Structural maintenance of chromosomes protein 6 | 12 |                       | EELIAILDHFNIQVDNPVSVLTQE<br>MSK      | 168 | 27 | 5 | 13.93 | b4b13y4y11*y11                    | 3082.52 | 122.213 | 7289  | 3 | 1028.18 | -19.008 |
| Q96SB8 SMC6_HUMAN Structural maintenance of chromosomes protein 6 | 13 |                       | SATGSVVSTR                           | 157 | 10 | 3 | 24.99 | b3b5y7                            | 964.51  | 61.124  | 6498  | 2 | 482.76  | -0.696  |
| Q96SB8 SMC6_HUMAN Structural maintenance of chromosomes protein 6 | 14 |                       | AFQNQENSVNQEIEQFQAIEK                | 418 | 22 | 4 | 22.3  | b3b13*b13b14                      | 2622.20 | 67.085  | 5358  | 3 | 874.74  | -15.269 |

|                                                                   |    |                       |                                |      |    |    |       |                                    |         |         |        |   |         |         |
|-------------------------------------------------------------------|----|-----------------------|--------------------------------|------|----|----|-------|------------------------------------|---------|---------|--------|---|---------|---------|
| Q96SB8 SMC6_HUMAN Structural maintenance of chromosomes protein 6 | 15 |                       | ETYLDLDSK                      | 899  | 9  | 6  | 71.87 | b4b5b6b8y4y7                       | 1083.50 | 58.052  | 3860   | 3 | 361.84  | -17.575 |
| Q96SB8 SMC6_HUMAN Structural maintenance of chromosomes protein 6 | 16 |                       | ASVYGNLILQQHISIDGSR            | 132  | 20 | 4  | 13.21 | b3y4y6°y6                          | 2158.08 | 118.079 | 2617   | 3 | 720.03  | -19.345 |
| Q96SB8 SMC6_HUMAN Structural maintenance of chromosomes protein 6 | 17 |                       | MNFDHK                         | 957  | 6  | 2  | 25.39 | b3y5                               | 791.35  | 29.072  | 2445   | 1 | 791.35  | -3.625  |
| Q96SB8 SMC6_HUMAN Structural maintenance of chromosomes protein 6 | 18 |                       | DVDSEISDLENEVENK               | 662  | 16 | 6  | 39.65 | b3b11*b11b12b13y11                 | 1834.86 | 52.750  | 2022   | 3 | 612.29  | 20.890  |
| Q96SB8 SMC6_HUMAN Structural maintenance of chromosomes protein 6 | 19 |                       | ELENIEEHQSVDIATLEDEAQENK       | 725  | 24 | 5  | 30.51 | b7b10b21y8y9                       | 2783.31 | 95.504  | 1975   | 3 | 928.44  | 7.719   |
| Q96SB8 SMC6_HUMAN Structural maintenance of chromosomes protein 6 | 20 |                       | AVMQSQKPPK                     | 621  | 10 | 4  | 24.99 | b4b9*b9y9                          | 1113.60 | 55.643  | 1916   | 2 | 557.30  | -8.769  |
| Q96SB8 SMC6_HUMAN Structural maintenance of chromosomes protein 6 | 21 |                       | QFILLTPQSMSSLPSSK              | 1043 | 17 | 4  | 23.99 | b15y4y8y11                         | 1863.98 | 98.070  | 1873   | 3 | 622.00  | -6.614  |
| Q96SB8 SMC6_HUMAN Structural maintenance of chromosomes protein 6 | 22 |                       | MVEEHMEQQK                     | 753  | 10 | 4  | 31.98 | y4y5°y5y9                          | 1288.58 | 98.009  | 1711   | 2 | 644.79  | 9.947   |
| Q96SB8 SMC6_HUMAN Structural maintenance of chromosomes protein 6 | 23 |                       | ENMEHLKSLK                     | 763  | 10 | 4  | 34.99 | b7°b7b8b9                          | 1228.62 | 99.055  | 139286 | 2 | 614.81  | -14.506 |
| Q96SB8 SMC6_HUMAN Structural maintenance of chromosomes protein 6 | 24 | Carbamidomethyl+C(12) | ISEETNARAPECMALK               | 334  | 16 | 5  | 28.56 | b4°b4b5y5y12                       | 1819.84 | 74.582  | 23941  | 3 | 607.29  | -13.751 |
| Q96SB8 SMC6_HUMAN Structural maintenance of chromosomes protein 6 | 25 |                       | RFGPNVPALLEAIDDAYR             | 478  | 18 | 3  | 14.27 | b6y4y6                             | 2017.05 | 105.660 | 7490   | 3 | 673.02  | 1.392   |
| Q96SB8 SMC6_HUMAN Structural maintenance of chromosomes protein 6 | 26 |                       | VKAFQNQENSVNQEIEQFQAIEK        | 416  | 24 | 5  | 21.14 | b11y11*y11y12*y12                  | 2849.40 | 90.254  | 6283   | 3 | 950.47  | -2.913  |
| Q96SB8 SMC6_HUMAN Structural maintenance of chromosomes protein 6 | 27 |                       | ELENIEEHQSVDIATLEDEAQENK<br>SK | 725  | 26 | 5  | 21.33 | b4b5°b5b12y6                       | 2998.44 | 76.836  | 5602   | 3 | 1000.15 | 10.422  |
| Q96SB8 SMC6_HUMAN Structural maintenance of chromosomes protein 6 | 28 |                       | DNKIGEDR                       | 294  | 9  | 5  | 42.19 | b4*b4b8y4y5                        | 1059.54 | 49.841  | 4665   | 2 | 530.27  | -3.456  |
| Q96SB8 SMC6_HUMAN Structural maintenance of chromosomes protein 6 | 29 | Carbamidomethyl+C(8)  | MSQARQICPER                    | 846  | 11 | 4  | 22.46 | b6°b6b8y5                          | 1375.65 | 136.429 | 3863   | 1 | 1375.65 | -8.519  |
| Q96SB8 SMC6_HUMAN Structural maintenance of chromosomes protein 6 | 30 |                       | RAYNEAEVLYNR                   | 357  | 12 | 3  | 20.51 | b11y3y8                            | 1497.74 | 83.990  | 3713   | 2 | 749.37  | -1.875  |
| Q96SB8 SMC6_HUMAN Structural maintenance of chromosomes protein 6 | 31 |                       | STDQSLEPERLER                  | 393  | 13 | 11 | 71.77 | b6b9°b9b10b11b12°b12y11y12°y12*y12 | 1559.78 | 76.296  | 2748   | 2 | 780.39  | 5.948   |
| Q96SB8 SMC6_HUMAN Structural maintenance of chromosomes protein 6 | 32 |                       | RPRQEELEDFDK                   | 16   | 12 | 3  | 20.51 | b6y4y7                             | 1561.74 | 53.218  | 2549   | 2 | 781.37  | -13.678 |
| Q96SB8 SMC6_HUMAN Structural maintenance of chromosomes protein 6 | 33 |                       | IQAHASHGDRREEIMR               | 877  | 16 | 6  | 32.84 | b4b5*b5b10*b10b12                  | 1878.89 | 53.227  | 2394   | 2 | 939.95  | -0.715  |

|                                                                   |    |                                          |                      |     |    |    |       |                                    |         |         |         |   |         |         |
|-------------------------------------------------------------------|----|------------------------------------------|----------------------|-----|----|----|-------|------------------------------------|---------|---------|---------|---|---------|---------|
| Q96SB8 SMC6_HUMAN Structural maintenance of chromosomes protein 6 | 34 |                                          | QFLQSKNEGDK          | 195 | 11 | 13 | 60.79 | b3*b3b8*b8b10y5°y5y6°y6*y6y8°y8*y8 | 1293.63 | 42.601  | 2056    | 2 | 647.32  | -9.531  |
| Q96SB8 SMC6_HUMAN Structural maintenance of chromosomes protein 6 | 35 | Phosphoryl STY(8)                        | DELNLADSEVDNQKR      | 798 | 15 | 4  | 29.51 | b5b6y6y12_H3PO4 y12                | 1825.78 | 86.550  | 13186   | 2 | 913.39  | -4.212  |
| Q96SB8 SMC6_HUMAN Structural maintenance of chromosomes protein 6 | 36 | Phosphoryl STY(15)                       | ASVYGNLSILQQHISIDGSR | 132 | 20 | 3  | 13.21 | b13y4y13                           | 2238.07 | 64.774  | 10993   | 4 | 560.27  | -6.981  |
| Q96SB8 SMC6_HUMAN Structural maintenance of chromosomes protein 6 | 37 | Carbamidomethyl+C(6); Phosphoryl STY(10) | SFSTVCFILSLWSIAESPFR | 992 | 20 | 8  | 44.25 | b5°b5b8b9b14_HPO3 b14y3y11y12      | 2427.14 | 79.481  | 2066    | 3 | 809.72  | 1.811   |
| Q96SB8 SMC6_HUMAN Structural maintenance of chromosomes protein 6 | 38 | Oxidation+M(15)                          | ATQLEQMKEDYSYIMETKER | 212 | 20 | 7  | 36.08 | b6b7*b7y7°y7y9y10                  | 2509.14 | 88.469  | 3310    | 3 | 837.05  | -6.227  |
| Q96SB8 SMC6_HUMAN Structural maintenance of chromosomes protein 6 | 39 | Oxidation+M(15)                          | ATQLEQMKEDYSYIMETK   | 212 | 18 | 6  | 43.22 | b3b4b5b8y8y11                      | 2224.04 | 77.268  | 2215    | 2 | 1112.52 | 10.978  |
| Q96SB8 SMC6_HUMAN Structural maintenance of chromosomes protein 6 | 40 | Oxidation+M(15)                          | IQAEHASHGDREEIMR     | 877 | 16 | 4  | 22.23 | b9°b9y8y9                          | 1894.87 | 94.429  | 1685    | 2 | 947.94  | -6.700  |
| Q96SB8 SMC6_HUMAN Structural maintenance of chromosomes protein 6 | 41 |                                          | SYIMETK              | 223 | 7  | 0  | 6.24  |                                    | 871.41  | 69.475  | 10115   | 1 | 871.41  | -14.779 |
| O15144 ARPC2_HUMAN Actin-related protein 2/3 complex subunit 2    | 1  |                                          | VFMQEFK              | 179 | 7  | 6  | 35.31 | b3b7y5y6y7*y7                      | 928.46  | 55.618  | 12666   | 2 | 464.74  | 4.207   |
| O15144 ARPC2_HUMAN Actin-related protein 2/3 complex subunit 2    | 2  |                                          | DNTINLIHTFR          | 237 | 11 | 7  | 25.47 | b5°b5*b5b6°b6*b6y3                 | 1343.72 | 54.145  | 12544   | 2 | 672.36  | 7.359   |
| O15144 ARPC2_HUMAN Actin-related protein 2/3 complex subunit 2    | 3  |                                          | YFQFQEEGKEGENR       | 127 | 14 | 4  | 17.67 | b6b8y4°y4                          | 1760.78 | 49.720  | 4264    | 4 | 440.95  | -6.725  |
| O15144 ARPC2_HUMAN Actin-related protein 2/3 complex subunit 2    | 4  |                                          | DYLHYHIK             | 248 | 8  | 3  | 34.03 | b3b5y5                             | 1088.57 | 49.733  | 4818    | 1 | 1088.57 | 15.139  |
| O15144 ARPC2_HUMAN Actin-related protein 2/3 complex subunit 2    | 5  |                                          | DTDAAVGDNIGYITFVLFPR | 210 | 20 | 4  | 30.07 | b4b6b12b17                         | 2184.11 | 108.089 | 2893    | 2 | 1092.56 | 5.924   |
| O15144 ARPC2_HUMAN Actin-related protein 2/3 complex subunit 2    | 6  |                                          | ELQAHGADLLKR         | 65  | 13 | 5  | 28.19 | b6*b6b9b12*b12                     | 1479.80 | 74.549  | 1514259 | 2 | 740.40  | 2.475   |
| O15144 ARPC2_HUMAN Actin-related protein 2/3 complex subunit 2    | 7  |                                          | FYKELQAHGADLLK       | 62  | 15 | 4  | 24.68 | b3b4°b4b6                          | 1761.89 | 58.067  | 59967   | 2 | 881.45  | -14.827 |
| O15144 ARPC2_HUMAN Actin-related protein 2/3 complex subunit 2    | 8  |                                          | TITGKTFSSR           | 290 | 10 | 3  | 24.99 | b9y5y8                             | 1097.60 | 83.316  | 4609    | 2 | 549.30  | 0.222   |
| O15144 ARPC2_HUMAN Actin-related protein 2/3 complex subunit 2    | 9  | Carbamidomethyl+C(2)                     | NCFASVFEKYFQFQEEGK   | 118 | 18 | 5  | 19.66 | b7b12y4y7*y7                       | 2258.02 | 94.392  | 2636    | 3 | 753.34  | -2.811  |
| O15144 ARPC2_HUMAN Actin-related protein 2/3 complex subunit 2    | 10 | Phosphoryl STY(10)                       | HTNASARDNTINLIHTFR   | 230 | 18 | 3  | 14.27 | b8y9y17                            | 2161.01 | 108.154 | 3220    | 2 | 1081.01 | -7.004  |
| P34931 HS71L_HUMAN Heat shock 70 kDa protein 1L                   | 1  |                                          | TTPSYVAFTDTER        | 38  | 13 | 12 | 71.77 | b1°b1b5°b5b9y1y3y5y6y9y11y13       | 1487.71 | 55.116  | 52107   | 2 | 744.36  | 5.580   |
| P34931 HS71L_HUMAN Heat shock 70 kDa protein 1L                   | 2  |                                          | ATAGDTHLGGEDFDNR     | 222 | 16 | 4  | 15.7  | b5°b5y6y13                         | 1675.74 | 39.397  | 1761    | 2 | 838.37  | 6.483   |

|                                                  |    |                                             |                                  |     |    |   |       |                          |         |         |       |   |         |         |
|--------------------------------------------------|----|---------------------------------------------|----------------------------------|-----|----|---|-------|--------------------------|---------|---------|-------|---|---------|---------|
| IP34931 HS71L_HUMAN Heat shock 70 kDa protein 1L | 3  | Carbamidomethyl+C(6); Carbamidomethyl+C(11) | LYQGGCTGPACGTGYVPGRPATG PTIEEVD  | 611 | 30 | 6 | 23.67 | b4b8b10b15y4y14          | 3080.42 | 110.768 | 34975 | 4 | 770.86  | 4.676   |
| IP34931 HS71L_HUMAN Heat shock 70 kDa protein 1L | 4  | Carbamidomethyl+C(6)                        | ELEQMCPNPIITK                    | 599 | 12 | 5 | 27.71 | b3°b3b9°b9b10            | 1475.69 | 39.459  | 13577 | 2 | 738.35  | -20.266 |
| IP34931 HS71L_HUMAN Heat shock 70 kDa protein 1L | 5  |                                             | DEFDHK                           | 591 | 6  | 1 | 12.93 | y4                       | 790.35  | 21.869  | 11550 | 2 | 395.68  | 14.828  |
| IP34931 HS71L_HUMAN Heat shock 70 kDa protein 1L | 6  |                                             | MVLDAEK                          | 519 | 7  | 3 | 35.31 | b5b6y3                   | 805.42  | 43.707  | 5997  | 2 | 403.22  | 13.110  |
| IP34931 HS71L_HUMAN Heat shock 70 kDa protein 1L | 7  |                                             | ISESDK                           | 563 | 6  | 2 | 12.93 | y3°y3                    | 678.34  | 42.674  | 5354  | 1 | 678.34  | 8.458   |
| IP34931 HS71L_HUMAN Heat shock 70 kDa protein 1L | 8  |                                             | ETAEAFLGHPVTNAVITVPAYFND SQR     | 130 | 27 | 6 | 23.81 | b5b6b13°b13y4y6          | 2947.39 | 84.040  | 4070  | 4 | 737.60  | -21.950 |
| IP34931 HS71L_HUMAN Heat shock 70 kDa protein 1L | 9  |                                             | FNDPVVQADMK                      | 79  | 11 | 8 | 34.12 | b7°b7°b7y4°y6°y6y7       | 1263.59 | 50.385  | 3967  | 2 | 632.30  | -11.399 |
| IP34931 HS71L_HUMAN Heat shock 70 kDa protein 1L | 10 |                                             | AEDEVQR                          | 528 | 7  | 3 | 38.32 | b3y4y6                   | 846.41  | 32.130  | 2402  | 1 | 846.41  | 15.144  |
| IP34931 HS71L_HUMAN Heat shock 70 kDa protein 1L | 11 | Carbamidomethyl+C(1)                        | CNELLSWLEVNQLAEK                 | 575 | 16 | 7 | 24.07 | b8°b8b9°b9°b9b11°b11     | 1946.00 | 86.478  | 2320  | 3 | 649.34  | 16.937  |
| IP34931 HS71L_HUMAN Heat shock 70 kDa protein 1L | 12 |                                             | LLQDYFNQR                        | 350 | 9  | 8 | 42.19 | b6°b6b8°b8°b8y4y7°y7     | 1125.56 | 34.954  | 1733  | 2 | 563.28  | -9.978  |
| IP34931 HS71L_HUMAN Heat shock 70 kDa protein 1L | 13 |                                             | NALESYAFNMK                      | 541 | 11 | 5 | 22.46 | b3y7°y7y9°y9             | 1287.58 | 32.590  | 1508  | 2 | 644.29  | -17.634 |
| IP34931 HS71L_HUMAN Heat shock 70 kDa protein 1L | 14 | Carbamidomethyl+C(5)                        | LRTACER                          | 264 | 7  | 4 | 47.76 | b6y4y5y6                 | 905.46  | 41.769  | 8328  | 2 | 453.24  | 2.090   |
| IP34931 HS71L_HUMAN Heat shock 70 kDa protein 1L | 15 |                                             | ETAEAFLGHPVTNAVITVPAYFND SQRQATK | 130 | 31 | 4 | 21.72 | b11°b11b12y11            | 3375.69 | 136.394 | 3945  | 3 | 1125.90 | -1.157  |
| IP34931 HS71L_HUMAN Heat shock 70 kDa protein 1L | 16 |                                             | NALESYAFNMKSVVSDEGLK             | 541 | 20 | 5 | 20.69 | b8°b8y4y14y17            | 2202.04 | 58.597  | 3348  | 2 | 1101.53 | -13.859 |
| IP34931 HS71L_HUMAN Heat shock 70 kDa protein 1L | 17 | Carbamidomethyl+C(1)                        | CNELLSWLEVNQLAEKDEFDHK           | 575 | 22 | 9 | 33.08 | b8b9°b9b21y7°y7y9y11°y11 | 2717.30 | 98.873  | 3160  | 3 | 906.44  | 4.043   |
| IP34931 HS71L_HUMAN Heat shock 70 kDa protein 1L | 18 |                                             | ATAGDTHLGGEDFDNRLVSHFVE EFK      | 222 | 26 | 7 | 28.13 | b5°b5b10b11b15y6y8       | 2891.33 | 43.359  | 2212  | 2 | 1446.17 | -8.697  |
| IP34931 HS71L_HUMAN Heat shock 70 kDa protein 1L | 19 | Carbamidomethyl+C(7)                        | ARFEELCADLFR                     | 301 | 12 | 4 | 20.51 | b5y6°y6y11               | 1526.73 | 103.461 | 1571  | 2 | 763.87  | -10.794 |
| IP34931 HS71L_HUMAN Heat shock 70 kDa protein 1L | 20 | Oxidation+M(10)                             | FNDPVVQADMK                      | 79  | 11 | 4 | 38.89 | b8b9b10y6                | 1279.60 | 66.540  | 24903 | 2 | 640.30  | 1.049   |
